# Supplementary material for: Evolution of gene dosage on the Z-chromosome of schistosome parasites
Source: eLife. 2018 Jul 25;7:e35684. doi: 10.7554/eLife.35684 (PMC6089595; doi:10.7554/eLife.35684)
Supplement: Figure 1—source data 1. [file elife-35684-fig1-data1.xlsx]

## Sheet: Figure 1-source data 1
Figure 1-source data 1 : Comparative genomics: coverage analysis and strata identification
Gene_ID_mans	Chrom_loc_GFF_mans	First_Base_GFF_mans	Gene_length_GFF_mans	Loc_cov_mans	Bestloc_input_mans	Scaffold_ID_jap	Scaffold_length_jap	Scaffold_Bestloc_jap	Male_Cov_jap	Female_Cov_jap	Loc_cov_jap	Scaffold_ID_haem	Scaffold_length_haem	Scaffold_Bestloc_haem	Female1_Cov_haem	Female2_Cov_haem	Loc_cov_haem	Strata1_Stringent	Strata2_Exhaustive
Smp_006190	Chr_ZW	12994687	7182	Z	Chr_Z	SJC_S009018	5758	Chr_Z	42	17	Z	Sha_scaffold781	63443	Chr_Z	13	4.5	Z	S0	S0
Smp_006230	Chr_ZW	12587764	5292	Z	Chr_Z	SJC_S002477	40683	Chr_Z	35	18	Z	Sha_scaffold717	216658	Chr_Z	13	4.1	Z	S0	S0
Smp_006250	Chr_ZW	12606856	12872	Z	Chr_Z	SJC_S003973	53386	Chr_Z	36	19	Z	Sha_scaffold717	216658	Chr_Z	13	4.1	Z	S0	S0
Smp_006290	Chr_ZW	12728164	5360	Z	Chr_Z	SJC_S008273	3308	Chr_Z	31	14	Z	Sha_scaffold717	216658	Chr_Z	13	4.1	Z	S0	S0
Smp_006300	Chr_ZW	12746277	2952	Z	Chr_Z	SJC_S001448	14366	Chr_Z	45	24	Z	Sha_scaffold717	216658	Chr_Z	13	4.1	Z	S0	S0
Smp_006320	Chr_ZW	12764172	10867	Z	Chr_Z	SJC_S008462	26826	Chr_Z	35	18	Z	Sha_scaffold2247	79753	Chr_Z	13	4.2	Z	S0	S0
Smp_006350	Chr_ZW	14167059	18348	Z	Chr_Z	SJC_S027968	9107	Chr_Z	35	16	Z	Sha_scaffold1526	100734	Chr_Z	12	4	Z	S0	S0
Smp_011560	Chr_ZW	19506646	23772	Z	Chr_Z	SJC_S000880	47459	Chr_Z	35	16	Z	Sha_scaffold740	649873	Chr_Z	14	4.4	Z	S0	S0
Smp_011600	Chr_ZW	19612683	1275	Z	Chr_Z	SJC_S001555	24032	Chr_Z	35	19	Z	Sha_scaffold740	649873	Chr_Z	14	4.4	Z	S0	S0
Smp_011680	Chr_ZW	23396548	25643	Z	Chr_Z	SJC_S000750	23556	Chr_Z	33	14	Z	Sha_scaffold740	649873	Chr_Z	14	4.4	Z	S0	S0
Smp_011690	Chr_ZW	23511340	22201	Z	Chr_Z	SJC_S021066	2860	Chr_Z	29	15	Z	Sha_scaffold1792	158631	Chr_Z	14	4.4	Z	S0	S0
Smp_011700	Chr_ZW	23539784	21080	Z	Chr_Z	SJC_S002742	14043	Chr_Z	35	17	Z	Sha_scaffold1792	158631	Chr_Z	14	4.4	Z	S0	S0
Smp_011710	Chr_ZW	23567972	13674	Z	Chr_Z	SJC_S025624	6292	Chr_Z	37	18	Z	Sha_scaffold1792	158631	Chr_Z	14	4.4	Z	S0	S0
Smp_011720	Chr_ZW	23627145	8718	Z	Chr_Z	SJC_S000649	67362	Chr_Z	36	19	Z	Sha_scaffold3072	21242	Chr_Z	12	3.8	Z	S0	S0
Smp_011860	Chr_ZW	23941159	15434	Z	Chr_Z	SJC_S000500	126336	Chr_Z	34	17	Z	Sha_scaffold59	264706	Chr_Z	13	4.2	Z	S0	S0
Smp_011870	Chr_ZW	23957019	821	Z	Chr_Z	SJC_S000500	126336	Chr_Z	34	17	Z	Sha_scaffold59	264706	Chr_Z	13	4.2	Z	S0	S0
Smp_011960	Chr_ZW	18401750	23907	Z	Chr_Z	SJC_S002725	14194	Chr_Z	34	16	Z	Sha_scaffold1751	135328	Chr_Z	15	4.5	Z	S0	S0
Smp_012000	Chr_ZW	18619127	5769	Z	Chr_Z	SJC_S025897	7423	Chr_Z	33	16	Z	Sha_scaffold2736	317484	Chr_Z	14	4.4	Z	S0	S0
Smp_012030	Chr_ZW	18712900	15465	Z	Chr_Z	SJC_S023768	11729	Chr_Z	36	19	Z	Sha_scaffold2736	317484	Chr_Z	14	4.4	Z	S0	S0
Smp_012050	Chr_ZW	18787660	305	Z	Chr_Z	SJC_S001697	130467	Chr_Z	30	15	Z	Sha_scaffold6	200389	Chr_Z	13	4.1	Z	S0	S0
Smp_012150	Chr_ZW	18944403	18702	Z	Chr_Z	SJC_S001068	40976	Chr_Z	34	17	Z	Sha_scaffold2134	106030	Chr_Z	12	4.1	Z	S0	S0
Smp_012200	Chr_ZW	19123003	5215	Z	Chr_Z	SJC_S000877	27433	Chr_Z	31	16	Z	Sha_scaffold1463	120812	Chr_Z	13	4.3	Z	S0	S0
Smp_019610	Chr_ZW	28267764	1349	Z	Chr_Z	SJC_S008078	6593	Chr_Z	38	16	Z	Sha_scaffold5931	17770	Chr_Z	13	3.8	Z	S0	S0
Smp_020840	Chr_ZW	11317299	170	Z	Chr_Z	SJC_S000608	155270	Chr_Z	32	15	Z	Sha_scaffold422	1179553	Chr_Z	14	4.4	Z	S0	S0
Smp_020920	Chr_ZW	11121564	3919	Z	Chr_Z	SJC_S002689	17240	Chr_Z	36	19	Z	Sha_scaffold2447	262647	Chr_Z	14	4.4	Z	S0	S0
Smp_020960	Chr_ZW	10952788	632	Z	Chr_Z	SJC_S002743	13303	Chr_Z	48	23	Z	Sha_scaffold250	130469	Chr_Z	15	4.5	Z	S0	S0
Smp_021390	Chr_ZW	24419085	22963	Z	Chr_Z	SJC_S002074	23431	Chr_Z	30	13	Z	Sha_scaffold737	171283	Chr_Z	13	4.2	Z	S0	S0
Smp_032920	Chr_ZW	15202318	4591	Z	Chr_Z	SJC_S001721	46906	Chr_Z	37	19	Z	Sha_scaffold2073	109154	Chr_UP	12	3.8	Z	S0	S0
Smp_032930	Chr_ZW	15207630	20498	Z	Chr_Z	SJC_S010106	7305	Chr_Z	35	18	Z	Sha_scaffold2073	109154	Chr_UP	12	3.8	Z	S0	S0
Smp_032970	Chr_ZW	15303525	2605	Z	Chr_Z	SJC_S025436	2708	Chr_Z	31	12	Z	Sha_scaffold2556	279375	Chr_Z	14	4.3	Z	S0	S0
Smp_033000	Chr_ZW	15333249	414	Z	Chr_Z	SJC_S008126	4560	Chr_Z	68	29	Z	Sha_scaffold2556	279375	Chr_Z	14	4.3	Z	S0	S0
Smp_033010	Chr_ZW	15348004	7793	Z	Chr_Z	SJC_S008546	19157	Chr_Z	37	19	Z	Sha_scaffold2556	279375	Chr_Z	14	4.3	Z	S0	S0
Smp_033020	Chr_ZW	15369612	10280	Z	Chr_Z	SJC_S008546	19157	Chr_Z	37	19	Z	Sha_scaffold2556	279375	Chr_Z	14	4.3	Z	S0	S0
Smp_033050	Chr_ZW	15422359	6456	Z	Chr_Z	SJC_S002527	48719	Chr_Z	33	18	Z	Sha_scaffold2556	279375	Chr_Z	14	4.3	Z	S0	S0
Smp_036470	Chr_ZW	11559354	5665	Z	Chr_Z	SJC_S000697	102625	Chr_Z	37	15	Z	Sha_scaffold422	1179553	Chr_Z	14	4.4	Z	S0	S0
Smp_036500	Chr_ZW	11703125	19824	Z	Chr_Z	SJC_S004792	8325	Chr_Z	35	17	Z	Sha_scaffold422	1179553	Chr_Z	14	4.4	Z	S0	S0
Smp_036550	Chr_ZW	11855599	7640	Z	Chr_Z	SJC_S005768	4682	Chr_Z	32	17	Z	Sha_scaffold422	1179553	Chr_Z	14	4.4	Z	S0	S0
Smp_036570	Chr_ZW	11967791	4049	Z	Chr_Z	SJC_S000427	87293	Chr_Z	36	18	Z	Sha_scaffold422	1179553	Chr_Z	14	4.4	Z	S0	S0
Smp_036590	Chr_ZW	12006412	5777	Z	Chr_Z	SJC_S000427	87293	Chr_Z	36	18	Z	Sha_scaffold422	1179553	Chr_Z	14	4.4	Z	S0	S0
Smp_036630	Chr_ZW	12085514	12602	Z	Chr_Z	SJC_S000427	87293	Chr_Z	36	18	Z	Sha_scaffold422	1179553	Chr_Z	14	4.4	Z	S0	S0
Smp_037190	Chr_ZW	15548800	2876	Z	Chr_Z	SJC_S004056	12909	Chr_Z	28	15	Z	Sha_scaffold1421	49644	Chr_Z	14	4.3	Z	S0	S0
Smp_038530	Chr_ZW	30762793	1460	Z	Chr_Z	SJC_S004225	12046	Chr_Z	41	20	Z	Sha_scaffold3024	167301	Chr_Z	14	4.3	Z	S0	S0
Smp_038540	Chr_ZW	30716599	1034	Z	Chr_Z	SJC_S001686	15554	Chr_Z	31	14	Z	Sha_scaffold1138	298986	Chr_Z	14	4.3	Z	S0	S0
Smp_038560	Chr_ZW	30638962	906	Z	Chr_Z	SJC_S000754	209660	Chr_PSA	33	16	Z	Sha_scaffold1138	298986	Chr_Z	14	4.3	Z	S0	S0
Smp_043390	Chr_ZW	17810791	17943	Z	Chr_Z	SJC_S007484	3770	Chr_Z	61	30	Z	Sha_scaffold1949	129328	Chr_Z	13	4.2	Z	S0	S0
Smp_043420	Chr_ZW	17755618	1007	Z	Chr_Z	SJC_S001983	23894	Chr_Z	33	15	Z	Sha_scaffold3428	27665	Chr_Z	14	4.3	Z	S0	S0
Smp_043430	Chr_ZW	17752755	2573	Z	Chr_Z	SJC_S001983	23894	Chr_Z	33	15	Z	Sha_scaffold3428	27665	Chr_Z	14	4.3	Z	S0	S0
Smp_043500	Chr_ZW	17586707	18317	Z	Chr_Z	SJC_S027815	7654	Chr_Z	32	15	Z	Sha_scaffold627	195226	Chr_Z	11	3.8	Z	S0	S0
Smp_044470	Chr_ZW	13912491	25484	Z	Chr_Z	SJC_S001151	101019	Chr_Z	45	22	Z	Sha_scaffold764	252691	Chr_Z	13	4.1	Z	S0	S0
Smp_044520	Chr_ZW	13270619	2214	Z	Chr_Z	SJC_S022627	1687	Chr_Z	58	28	Z	Sha_scaffold764	252691	Chr_Z	13	4.1	Z	S0	S0
Smp_046980	Chr_ZW	29181128	2804	Z	Chr_Z	SJC_S001451	50456	Chr_Z	36	18	Z	Sha_scaffold1268	520774	Chr_Z	13	4.3	Z	S0	S0
Smp_047020	Chr_ZW	29034207	620	Z	Chr_Z	SJC_S005097	3628	Chr_Z	30	13	Z	Sha_C10178214	3499	Chr_Z	15	4.3	Z	S0	S0
Smp_047060	Chr_ZW	28888532	7503	Z	Chr_Z	SJC_S001449	46935	Chr_Z	31	15	Z	Sha_scaffold1238	66559	Chr_UP	14	4.7	Z	S0	S0
Smp_047090	Chr_ZW	28791866	5401	Z	Chr_Z	SJC_S008319	9066	Chr_Z	36	18	Z	Sha_scaffold1504	506468	Chr_Z	14	4.4	Z	S0	S0
Smp_047100	Chr_ZW	28767209	18897	Z	Chr_Z	SJC_S001606	48419	Chr_Z	33	15	Z	Sha_scaffold1504	506468	Chr_Z	14	4.4	Z	S0	S0
Smp_047110	Chr_ZW	28756968	10752	Z	Chr_Z	SJC_S001606	48419	Chr_Z	33	15	Z	Sha_scaffold1504	506468	Chr_Z	14	4.4	Z	S0	S0
Smp_047240	Chr_ZW	29337688	5146	Z	Chr_Z	SJC_S001388	42085	Chr_Z	37	17	Z	Sha_scaffold1268	520774	Chr_Z	13	4.3	Z	S0	S0
Smp_053420	Chr_ZW	16479381	2768	Z	Chr_Z	SJC_S002080	23388	Chr_Z	33	16	Z	Sha_scaffold271	336557	Chr_Z	14	4.4	Z	S0	S0
Smp_053460	Chr_ZW	16409733	6149	Z	Chr_Z	SJC_S000441	101854	Chr_Z	36	18	Z	Sha_scaffold1844	231660	Chr_Z	14	4.4	Z	S0	S0
Smp_053470	Chr_ZW	16401603	5412	Z	Chr_Z	SJC_S000441	101854	Chr_Z	36	18	Z	Sha_C10185596	4218	Chr_Z	15	5.7	Z	S0	S0
Smp_058730	Chr_ZW	12523957	13743	Z	Chr_Z	SJC_S003973	53386	Chr_Z	36	19	Z	Sha_scaffold3453	45782	Chr_Z	12	4.1	Z	S0	S0
Smp_058780	Chr_ZW	12410305	3940	Z	Chr_Z	SJC_S006766	3667	Chr_Z	25	13	Z	Sha_scaffold3453	45782	Chr_Z	12	4.1	Z	S0	S0
Smp_058790	Chr_ZW	12400145	8348	Z	Chr_Z	SJC_S001587	34774	Chr_Z	31	16	Z	Sha_scaffold3068	30052	Chr_Z	11	3.6	Z	S0	S0
Smp_059910	Chr_ZW	24119967	1062	Z	Chr_Z	SJC_S013925	3347	Chr_Z	31	15	Z	Sha_scaffold59	264706	Chr_Z	13	4.2	Z	S0	S0
Smp_059930	Chr_ZW	24076254	356	Z	Chr_Z	SJC_S000602	53458	Chr_Z	30	15	Z	Sha_scaffold59	264706	Chr_Z	13	4.2	Z	S0	S0
Smp_061840	Chr_ZW	30261923	18647	Z	Chr_Z	SJC_S002625	20860	Chr_Z	34	17	Z	Sha_scaffold1828	58446	Chr_Z	13	4.2	Z	S0	S0
Smp_061870	Chr_ZW	30146754	11239	Z	Chr_Z	SJC_S004475	24015	Chr_Z	35	18	Z	Sha_scaffold1504	506468	Chr_Z	14	4.4	Z	S0	S0
Smp_061940	Chr_ZW	29940617	10632	Z	Chr_Z	SJC_S001485	31393	Chr_Z	33	17	Z	Sha_scaffold1530	79166	Chr_Z	12	4.1	Z	S0	S0
Smp_061950	Chr_ZW	29912411	7970	Z	Chr_Z	SJC_S000505	163621	Chr_Z	32	16	Z	Sha_scaffold1530	79166	Chr_Z	12	4.1	Z	S0	S0
Smp_068220	Chr_ZW	25120005	7998	Z	Chr_Z	SJC_S004004	13297	Chr_Z	36	19	Z	Sha_scaffold824	605303	Chr_Z	14	4.4	Z	S0	S0
Smp_068230	Chr_ZW	25166851	7616	Z	Chr_Z	SJC_S003228	6873	Chr_Z	35	19	Z	Sha_scaffold824	605303	Chr_Z	14	4.4	Z	S0	S0
Smp_068240	Chr_ZW	25235598	4565	Z	Chr_Z	SJC_S000440	78376	Chr_Z	36	18	Z	Sha_scaffold824	605303	Chr_Z	14	4.4	Z	S0	S0
Smp_068250	Chr_ZW	25245269	17910	Z	Chr_Z	SJC_S000440	78376	Chr_Z	36	18	Z	Sha_scaffold824	605303	Chr_Z	14	4.4	Z	S0	S0
Smp_068270	Chr_ZW	25286915	11848	Z	Chr_Z	SJC_S000780	26663	Chr_Z	30	15	Z	Sha_scaffold824	605303	Chr_Z	14	4.4	Z	S0	S0
Smp_068280	Chr_ZW	25311577	25619	Z	Chr_Z	SJC_S000929	31658	Chr_Z	41	20	Z	Sha_scaffold3877	26644	Chr_Z	12	4	Z	S0	S0
Smp_068300	Chr_ZW	25344404	13346	Z	Chr_Z	SJC_S008139	14365	Chr_Z	36	18	Z	Sha_scaffold1291	23446	Chr_Z	12	4.1	Z	S0	S0
Smp_078270	Chr_ZW	26185644	1878	Z	Chr_Z	SJC_S001791	168667	Chr_Z	45	22	Z	Sha_scaffold1482	100012	Chr_Z	11	3.5	Z	S0	S0
Smp_078280	Chr_ZW	26206232	26020	Z	Chr_Z	SJC_S001791	168667	Chr_Z	45	22	Z	Sha_scaffold2498	72265	Chr_Z	14	4.4	Z	S0	S0
Smp_078310	Chr_ZW	26251877	5121	Z	Chr_Z	SJC_S003919	14150	Chr_Z	37	18	Z	Sha_scaffold2498	72265	Chr_Z	14	4.4	Z	S0	S0
Smp_078320	Chr_ZW	26272420	620	Z	Chr_Z	SJC_S005781	9188	Chr_Z	31	16	Z	Sha_scaffold960	38894	Chr_UP	14	4.8	Z	S0	S0
Smp_078410	Chr_ZW	17453849	3494	Z	Chr_Z	SJC_S000213	217068	Chr_Z	38	17	Z	Sha_scaffold1239	347083	Chr_Z	14	4.4	Z	S0	S0
Smp_078420	Chr_ZW	17458353	8415	Z	Chr_Z	SJC_S000213	217068	Chr_Z	38	17	Z	Sha_scaffold1239	347083	Chr_Z	14	4.4	Z	S0	S0
Smp_079910	Chr_ZW	24578141	11337	Z	Chr_Z	SJC_S002796	13184	Chr_Z	39	17	Z	Sha_C10194232	6155	Chr_Z	14	3.9	Z	S0	S0
Smp_079920	Chr_ZW	24606396	9958	Z	Chr_Z	SJC_S000565	147778	Chr_Z	37	18	Z	Sha_scaffold2922	78959	Chr_Z	13	3.9	Z	S0	S0
Smp_079950	Chr_ZW	24665408	4246	Z	Chr_Z	SJC_S004440	10261	Chr_Z	35	17	Z	Sha_scaffold1483	408413	Chr_Z	13	4.3	Z	S0	S0
Smp_080030	Chr_ZW	24842240	4529	Z	Chr_Z	SJC_S000440	78376	Chr_Z	36	18	Z	Sha_scaffold824	605303	Chr_Z	14	4.4	Z	S0	S0
Smp_080370	Chr_ZW	26430357	990	Z	Chr_Z	SJC_S004713	26577	Chr_Z	32	15	Z	Sha_scaffold5190	5166	Chr_Z	8.1	3	Z	S0	S0
Smp_080530	Chr_ZW	17082626	3885	Z	Chr_Z	SJC_S002499	22662	Chr_Z	39	21	Z	Sha_scaffold3384	36978	Chr_Z	9.7	3.1	Z	S0	S0
Smp_080550	Chr_ZW	17151880	9488	Z	Chr_Z	SJC_S000213	217068	Chr_Z	38	17	Z	Sha_scaffold1239	347083	Chr_Z	14	4.4	Z	S0	S0
Smp_080560	Chr_ZW	17161564	14673	Z	Chr_Z	SJC_S028041	7242	Chr_Z	32	15	Z	Sha_scaffold1239	347083	Chr_Z	14	4.4	Z	S0	S0
Smp_087980	Chr_ZW	27310535	2127	Z	Chr_Z	SJC_S015850	7713	Chr_Z	31	14	Z	Sha_scaffold1483	408413	Chr_Z	13	4.3	Z	S0	S0
Smp_088060	Chr_ZW	27551441	1409	Z	Chr_Z	SJC_S003874	10840	Chr_Z	30	15	Z	Sha_scaffold1517	416780	Chr_Z	14	4.4	Z	S0	S0
Smp_088090	Chr_ZW	27678198	7344	Z	Chr_Z	SJC_S008378	8523	Chr_Z	31	15	Z	Sha_scaffold1517	416780	Chr_Z	14	4.4	Z	S0	S0
Smp_091160	Chr_ZW	16051910	3130	Z	Chr_Z	SJC_S001697	130467	Chr_Z	30	15	Z	Sha_scaffold1156	205486	Chr_Z	13	4.1	Z	S0	S0
Smp_091170	Chr_ZW	15996790	290	Z	Chr_Z	SJC_S000441	101854	Chr_Z	36	18	Z	Sha_scaffold1156	205486	Chr_Z	13	4.1	Z	S0	S0
Smp_091190	Chr_ZW	15961543	19342	Z	Chr_Z	SJC_S000441	101854	Chr_Z	36	18	Z	Sha_scaffold1156	205486	Chr_Z	13	4.1	Z	S0	S0
Smp_091210	Chr_ZW	15908074	1610	Z	Chr_Z	SJC_S020781	4138	Chr_Z	38	16	Z	Sha_scaffold1156	205486	Chr_Z	13	4.1	Z	S0	S0
Smp_093930	Chr_ZW	17917286	59898	Z	Chr_Z	SJC_S005412	6246	Chr_Z	31	15	Z	Sha_scaffold1738	171371	Chr_UP	14	4.4	Z	S0	S0
Smp_094470	Chr_ZW	27274100	1067	Z	Chr_Z	SJC_S000565	147778	Chr_Z	37	18	Z	Sha_scaffold2609	81274	Chr_Z	13	4.1	Z	S0	S0
Smp_094500	Chr_ZW	27201149	26301	Z	Chr_Z	SJC_S001210	32997	Chr_Z	34	16	Z	Sha_scaffold1145	207737	Chr_Z	14	4.5	Z	S0	S0
Smp_094760	Chr_ZW	28003646	5556	Z	Chr_Z	SJC_S003540	30721	Chr_Z	32	16	Z	Sha_scaffold1483	408413	Chr_Z	13	4.3	Z	S0	S0
Smp_094810	Chr_ZW	27882842	15735	Z	Chr_Z	SJC_S000651	61452	Chr_Z	34	17	Z	Sha_scaffold1483	408413	Chr_Z	13	4.3	Z	S0	S0
Smp_094820	Chr_ZW	27864788	8105	Z	Chr_Z	SJC_S000879	41920	Chr_Z	35	17	Z	Sha_scaffold1151	148286	Chr_Z	13	4.2	Z	S0	S0
Smp_094950	Chr_ZW	18094638	18746	Z	Chr_Z	SJC_S000721	118070	Chr_Z	66	31	Z	Sha_scaffold1406	127494	Chr_Z	15	4.7	Z	S0	S0
Smp_095000	Chr_ZW	18194525	16958	Z	Chr_Z	SJC_S000783	114736	Chr_Z	31	16	Z	Sha_scaffold1616	66132	Chr_Z	12	4.2	Z	S0	S0
Smp_095010	Chr_ZW	18221116	12697	Z	Chr_Z	SJC_S001486	23221	Chr_Z	34	17	Z	Sha_scaffold1616	66132	Chr_Z	12	4.2	Z	S0	S0
Smp_095150	Chr_ZW	16716567	7806	Z	Chr_Z	SJC_S014397	16021	Chr_Z	32	16	Z	Sha_scaffold2059	271576	Chr_Z	14	4.5	Z	S0	S0
Smp_095190	Chr_ZW	16834051	6431	Z	Chr_Z	SJC_S003979	60367	Chr_Z	33	15	Z	Sha_scaffold2059	271576	Chr_Z	14	4.5	Z	S0	S0
Smp_096410	Chr_ZW	14576860	5472	Z	Chr_Z	SJC_S001412	41663	Chr_Z	34	17	Z	Sha_scaffold452	276764	Chr_Z	14	4.4	Z	S0	S0
Smp_096450	Chr_ZW	14438004	26708	Z	Chr_Z	SJC_S001390	34737	Chr_Z	37	17	Z	Sha_scaffold452	276764	Chr_Z	14	4.4	Z	S0	S0
Smp_096480	Chr_ZW	14367763	1535	Z	Chr_Z	SJC_S001394	61049	Chr_Z	36	17	Z	Sha_scaffold5129	40298	Chr_Z	13	4.1	Z	S0	S0
Smp_101890	Chr_ZW	26335416	317	Z	Chr_Z	SJC_S001791	168667	Chr_Z	45	22	Z	Sha_scaffold2601	23949	Chr_Z	11	3.7	Z	S0	S0
Smp_101970	Chr_ZW	25009922	7678	Z	Chr_Z	SJC_S001573	59778	Chr_Z	37	18	Z	Sha_scaffold824	605303	Chr_Z	14	4.4	Z	S0	S0
Smp_102240	Chr_ZW	12864642	1888	Z	Chr_Z	SJC_S004203	19697	Chr_Z	31	16	Z	Sha_scaffold2247	79753	Chr_Z	13	4.2	Z	S0	S0
Smp_102330	Chr_ZW	16938180	18391	Z	Chr_Z	SJC_S003801	14838	Chr_Z	40	19	Z	Sha_scaffold771	89710	Chr_Z	14	4.6	Z	S0	S0
Smp_103100	Chr_ZW	26872311	15391	Z	Chr_Z	SJC_S001588	121741	Chr_Z	34	17	Z	Sha_scaffold617	312176	Chr_Z	13	4.2	Z	S0	S0
Smp_103740	Chr_ZW	17301738	11679	Z	Chr_Z	SJC_S001045	37533	Chr_Z	42	21	Z	Sha_scaffold1239	347083	Chr_Z	14	4.4	Z	S0	S0
Smp_107200	Chr_ZW	18371863	398	Z	Chr_Z	SJC_S001564	39616	Chr_Z	39	19	Z	Sha_scaffold1751	135328	Chr_Z	15	4.5	Z	S0	S0
Smp_114290	Chr_ZW	15683559	4640	Z	Chr_Z	SJC_S001911	28026	Chr_Z	34	15	Z	Sha_scaffold1089	240715	Chr_Z	14	4.4	Z	S0	S0
Smp_119110	Chr_ZW	17354499	1979	Z	Chr_Z	SJC_S000213	217068	Chr_Z	38	17	Z	Sha_scaffold1239	347083	Chr_Z	14	4.4	Z	S0	S0
Smp_125530	Chr_ZW	13023630	29265	Z	Chr_Z	SJC_S000944	56755	Chr_Z	76	26	Z	Sha_scaffold658	69623	Chr_Z	12	4	Z	S0	S0
Smp_125550	Chr_ZW	12638688	39710	Z	Chr_Z	SJC_S001462	24340	Chr_Z	35	17	Z	Sha_scaffold2245	61333	Chr_Z	12	3.8	Z	S0	S0
Smp_125580	Chr_ZW	12736751	5776	Z	Chr_Z	SJC_S024238	1393	Chr_Z	50	20	Z	Sha_scaffold717	216658	Chr_Z	13	4.1	Z	S0	S0
Smp_125590	Chr_ZW	12801377	14508	Z	Chr_Z	SJC_S001290	28134	Chr_Z	38	19	Z	Sha_scaffold2247	79753	Chr_Z	13	4.2	Z	S0	S0
Smp_128330	Chr_ZW	19247864	11408	Z	Chr_Z	SJC_S002439	8325	Chr_Z	35	17	Z	Sha_scaffold740	649873	Chr_Z	14	4.4	Z	S0	S0
Smp_128350	Chr_ZW	19323888	12384	Z	Chr_Z	SJC_S003549	1158	Chr_Z	36	18	Z	Sha_scaffold740	649873	Chr_Z	14	4.4	Z	S0	S0
Smp_128360	Chr_ZW	19359832	36828	Z	Chr_Z	SJC_S007565	13435	Chr_Z	34	17	Z	Sha_scaffold740	649873	Chr_Z	14	4.4	Z	S0	S0
Smp_128370	Chr_ZW	19423835	16656	Z	Chr_Z	SJC_S003236	3591	Chr_Z	31	15	Z	Sha_scaffold740	649873	Chr_Z	14	4.4	Z	S0	S0
Smp_128380	Chr_ZW	19452173	49264	Z	Chr_Z	SJC_S000880	47459	Chr_Z	35	16	Z	Sha_scaffold740	649873	Chr_Z	14	4.4	Z	S0	S0
Smp_128400	Chr_ZW	19620598	12668	Z	Chr_Z	SJC_S001555	24032	Chr_Z	35	19	Z	Sha_scaffold740	649873	Chr_Z	14	4.4	Z	S0	S0
Smp_128420	Chr_ZW	23639413	3231	Z	Chr_Z	SJC_S000649	67362	Chr_Z	36	19	Z	Sha_scaffold3072	21242	Chr_Z	12	3.8	Z	S0	S0
Smp_128460	Chr_ZW	23791889	22699	Z	Chr_Z	SJC_S000594	261777	Chr_Z	34	16	Z	Sha_scaffold4373	24814	Chr_Z	15	5	Z	S0	S0
Smp_128470	Chr_ZW	23818990	9688	Z	Chr_Z	SJC_S000594	261777	Chr_Z	34	16	Z	Sha_scaffold3463	913	Chr_Z	10	3.7	Z	S0	S0
Smp_128480	Chr_ZW	23871999	51350	Z	Chr_Z	SJC_S000594	261777	Chr_Z	34	16	Z	Sha_scaffold2130	80138	Chr_Z	14	4.4	Z	S0	S0
Smp_128490	Chr_ZW	23958186	35565	Z	Chr_Z	SJC_S004273	4032	Chr_Z	33	18	Z	Sha_scaffold59	264706	Chr_Z	13	4.2	Z	S0	S0
Smp_128550	Chr_ZW	18481425	3821	Z	Chr_Z	SJC_S007625	11438	Chr_Z	32	14	Z	Sha_scaffold2736	317484	Chr_Z	14	4.4	Z	S0	S0
Smp_128580	Chr_ZW	18667779	14549	Z	Chr_Z	SJC_S004838	24321	Chr_Z	31	14	Z	Sha_scaffold2736	317484	Chr_Z	14	4.4	Z	S0	S0
Smp_128590	Chr_ZW	18685492	9727	Z	Chr_Z	SJC_S006350	9818	Chr_Z	32	13	Z	Sha_scaffold2736	317484	Chr_Z	14	4.4	Z	S0	S0
Smp_128600	Chr_ZW	18749576	27483	Z	Chr_Z	SJC_S001497	24072	Chr_Z	46	21	Z	Sha_scaffold6	200389	Chr_Z	13	4.1	Z	S0	S0
Smp_128610	Chr_ZW	18788117	631	Z	Chr_Z	SJC_S001697	130467	Chr_Z	30	15	Z	Sha_scaffold6	200389	Chr_Z	13	4.1	Z	S0	S0
Smp_128650	Chr_ZW	18935125	6889	Z	Chr_Z	SJC_S001068	40976	Chr_Z	34	17	Z	Sha_scaffold2134	106030	Chr_Z	12	4.1	Z	S0	S0
Smp_128660	Chr_ZW	18977675	40206	Z	Chr_Z	SJC_S003808	9475	Chr_Z	40	20	Z	Sha_scaffold2134	106030	Chr_Z	12	4.1	Z	S0	S0
Smp_128680	Chr_ZW	19077289	30813	Z	Chr_Z	SJC_S026309	17740	Chr_Z	45	21	Z	Sha_scaffold1463	120812	Chr_Z	13	4.3	Z	S0	S0
Smp_128690	Chr_ZW	19130240	43234	Z	Chr_Z	SJC_S000877	27433	Chr_Z	31	16	Z	Sha_scaffold1463	120812	Chr_Z	13	4.3	Z	S0	S0
Smp_132900	Chr_ZW	28276785	11977	Z	Chr_Z	SJC_S000807	184739	Chr_Z	35	17	Z	Sha_scaffold2363	48711	Chr_Z	13	4.2	Z	S0	S0
Smp_133510	Chr_ZW	11266179	46384	Z	Chr_Z	SJC_S002408	24185	Chr_Z	36	20	Z	Sha_scaffold422	1179553	Chr_Z	14	4.4	Z	S0	S0
Smp_133520	Chr_ZW	11171054	9454	Z	Chr_Z	SJC_S027604	3637	Chr_Z	32	14	Z	Sha_scaffold2447	262647	Chr_Z	14	4.4	Z	S0	S0
Smp_133540	Chr_ZW	11076454	29946	Z	Chr_Z	SJC_S023607	12241	Chr_Z	37	18	Z	Sha_scaffold2447	262647	Chr_Z	14	4.4	Z	S0	S0
Smp_133550	Chr_ZW	11070338	1748	Z	Chr_Z	SJC_S007229	7205	Chr_Z	32	13	Z	Sha_scaffold2447	262647	Chr_Z	14	4.4	Z	S0	S0
Smp_133560	Chr_ZW	11019227	14281	Z	Chr_Z	SJC_S004830	22133	Chr_Z	33	15	Z	Sha_scaffold2447	262647	Chr_Z	14	4.4	Z	S0	S0
Smp_133730	Chr_ZW	24274239	580	Z	Chr_Z	SJC_S000594	261777	Chr_Z	34	16	Z	Sha_scaffold6581	15973	Chr_Z	12	4.2	Z	S0	S0
Smp_133740	Chr_ZW	24284358	35139	Z	Chr_Z	SJC_S000594	261777	Chr_Z	34	16	Z	Sha_scaffold2424	99013	Chr_Z	13	4.1	Z	S0	S0
Smp_133750	Chr_ZW	24328651	1307	Z	Chr_Z	SJC_S001445	21571	Chr_Z	31	15	Z	Sha_scaffold2424	99013	Chr_Z	13	4.1	Z	S0	S0
Smp_133770	Chr_ZW	24463517	5369	Z	Chr_Z	SJC_S003008	14657	Chr_Z	33	15	Z	Sha_scaffold737	171283	Chr_Z	13	4.2	Z	S0	S0
Smp_133790	Chr_ZW	24500216	26742	Z	Chr_Z	SJC_S001113	40942	Chr_Z	32	17	Z	Sha_scaffold737	171283	Chr_Z	13	4.2	Z	S0	S0
Smp_134980	Chr_ZW	11510740	14862	Z	Chr_Z	SJC_S000697	102625	Chr_Z	37	15	Z	Sha_scaffold422	1179553	Chr_Z	14	4.4	Z	S0	S0
Smp_135010	Chr_ZW	11393307	20865	Z	Chr_Z	SJC_S002827	23900	Chr_Z	30	14	Z	Sha_scaffold422	1179553	Chr_Z	14	4.4	Z	S0	S0
Smp_135020	Chr_ZW	11320473	10756	Z	Chr_Z	SJC_S000608	155270	Chr_Z	32	15	Z	Sha_scaffold422	1179553	Chr_Z	14	4.4	Z	S0	S0
Smp_139950	Chr_ZW	15231318	6000	Z	Chr_Z	SJC_S002314	30859	Chr_Z	35	17	Z	Sha_scaffold2556	279375	Chr_Z	14	4.3	Z	S0	S0
Smp_139970	Chr_ZW	15283962	1353	Z	Chr_Z	SJC_S003137	1936	Chr_Z	30	13	Z	Sha_scaffold2556	279375	Chr_Z	14	4.3	Z	S0	S0
Smp_141800	Chr_ZW	11553838	4893	Z	Chr_Z	SJC_S000697	102625	Chr_Z	37	15	Z	Sha_scaffold422	1179553	Chr_Z	14	4.4	Z	S0	S0
Smp_141810	Chr_ZW	11615451	55977	Z	Chr_Z	SJC_S002343	31099	Chr_Z	33	17	Z	Sha_scaffold422	1179553	Chr_Z	14	4.4	Z	S0	S0
Smp_141830	Chr_ZW	11736970	45730	Z	Chr_Z	SJC_S005767	10799	Chr_Z	32	14	Z	Sha_scaffold422	1179553	Chr_Z	14	4.4	Z	S0	S0
Smp_141840	Chr_ZW	11815576	5520	Z	Chr_Z	SJC_S002597	47567	Chr_Z	34	16	Z	Sha_scaffold422	1179553	Chr_Z	14	4.4	Z	S0	S0
Smp_141850	Chr_ZW	11822467	24329	Z	Chr_Z	SJC_S002597	47567	Chr_Z	34	16	Z	Sha_scaffold422	1179553	Chr_Z	14	4.4	Z	S0	S0
Smp_141860	Chr_ZW	11866487	84552	Z	Chr_Z	SJC_S001187	68355	Chr_Z	33	16	Z	Sha_scaffold422	1179553	Chr_Z	14	4.4	Z	S0	S0
Smp_141880	Chr_ZW	12043626	29499	Z	Chr_Z	SJC_S002448	8541	Chr_Z	32	15	Z	Sha_scaffold422	1179553	Chr_Z	14	4.4	Z	S0	S0
Smp_141890	Chr_ZW	12098882	19908	Z	Chr_Z	SJC_S000427	87293	Chr_Z	36	18	Z	Sha_scaffold422	1179553	Chr_Z	14	4.4	Z	S0	S0
Smp_141900	Chr_ZW	12134884	57845	Z	Chr_Z	SJC_S014464	10552	Chr_Z	31	16	Z	Sha_scaffold422	1179553	Chr_Z	14	4.4	Z	S0	S0
Smp_141910	Chr_ZW	12199790	52119	Z	Chr_Z	SJC_S008719	19270	Chr_Z	33	16	Z	Sha_scaffold422	1179553	Chr_Z	14	4.4	Z	S0	S0
Smp_141920	Chr_ZW	12254470	3521	Z	Chr_Z	SJC_S002225	15873	Chr_Z	31	15	Z	Sha_scaffold422	1179553	Chr_Z	14	4.4	Z	S0	S0
Smp_142130	Chr_ZW	15614833	62713	Z	Chr_Z	SJC_S008992	9737	Chr_Z	29	13	Z	Sha_scaffold1089	240715	Chr_Z	14	4.4	Z	S0	S0
Smp_142140	Chr_ZW	15697361	22066	Z	Chr_Z	SJC_S001911	28026	Chr_Z	34	15	Z	Sha_scaffold1089	240715	Chr_Z	14	4.4	Z	S0	S0
Smp_142150	Chr_ZW	15756355	21455	Z	Chr_Z	SJC_S008309	10276	Chr_Z	35	15	Z	Sha_scaffold1089	240715	Chr_Z	14	4.4	Z	S0	S0
Smp_142160	Chr_ZW	15804259	4898	Z	Chr_Z	SJC_S007963	11436	Chr_Z	34	15	Z	Sha_scaffold1089	240715	Chr_Z	14	4.4	Z	S0	S0
Smp_142170	Chr_ZW	15810007	16814	Z	Chr_Z	SJC_S003725	20330	Chr_Z	37	19	Z	Sha_C10197490	9908	Chr_Z	14	4.8	Z	S0	S0
Smp_142180	Chr_ZW	15838466	20139	Z	Chr_Z	SJC_S003725	20330	Chr_Z	37	19	Z	Sha_scaffold1918	43038	Chr_Z	12	3.9	Z	S0	S0
Smp_142190	Chr_ZW	15560921	21458	Z	Chr_Z	SJC_S002062	13146	Chr_Z	31	15	Z	Sha_scaffold1089	240715	Chr_Z	14	4.4	Z	S0	S0
Smp_143060	Chr_ZW	26172439	1113	Z	Chr_Z	SJC_S001906	36404	Chr_Z	33	16	Z	Sha_scaffold1482	100012	Chr_Z	11	3.5	Z	S0	S0
Smp_143070	Chr_ZW	26153363	12133	Z	Chr_Z	SJC_S001906	36404	Chr_Z	33	16	Z	Sha_scaffold1482	100012	Chr_Z	11	3.5	Z	S0	S0
Smp_143090	Chr_ZW	30771622	8251	Z	Chr_Z	SJC_S010452	2016	Chr_Z	30	16	Z	Sha_scaffold3024	167301	Chr_Z	14	4.3	Z	S0	S0
Smp_143110	Chr_ZW	30649836	57084	Z	Chr_Z	SJC_S003458	10077	Chr_Z	32	14	Z	Sha_scaffold1138	298986	Chr_Z	14	4.3	Z	S0	S0
Smp_143130	Chr_ZW	30589781	24297	Z	Chr_Z	SJC_S000754	209660	Chr_PSA	33	16	Z	Sha_scaffold1138	298986	Chr_Z	14	4.3	Z	S0	S0
Smp_145550	Chr_ZW	17831970	19637	Z	Chr_Z	SJC_S002356	14681	Chr_Z	34	17	Z	Sha_scaffold1949	129328	Chr_Z	13	4.2	Z	S0	S0
Smp_145560	Chr_ZW	17769372	29912	Z	Chr_Z	SJC_S004816	8341	Chr_Z	65	33	Z	Sha_scaffold1949	129328	Chr_Z	13	4.2	Z	S0	S0
Smp_145570	Chr_ZW	17761199	683	Z	Chr_Z	SJC_S001983	23894	Chr_Z	33	15	Z	Sha_scaffold3428	27665	Chr_Z	14	4.3	Z	S0	S0
Smp_145580	Chr_ZW	17756883	3700	Z	Chr_Z	SJC_S001983	23894	Chr_Z	33	15	Z	Sha_scaffold3428	27665	Chr_Z	14	4.3	Z	S0	S0
Smp_145600	Chr_ZW	17678470	19667	Z	Chr_Z	SJC_S001278	46594	Chr_Z	39	19	Z	Sha_scaffold627	195226	Chr_Z	11	3.8	Z	S0	S0
Smp_145610	Chr_ZW	17646970	13725	Z	Chr_Z	SJC_S001278	46594	Chr_Z	39	19	Z	Sha_scaffold627	195226	Chr_Z	11	3.8	Z	S0	S0
Smp_145620	Chr_ZW	17576949	2952	Z	Chr_Z	SJC_S000213	217068	Chr_Z	38	17	Z	Sha_scaffold627	195226	Chr_Z	11	3.8	Z	S0	S0
Smp_145630	Chr_ZW	17486314	8165	Z	Chr_Z	SJC_S025610	3378	Chr_Z	43	16	Z	Sha_scaffold627	195226	Chr_Z	11	3.8	Z	S0	S0
Smp_145640	Chr_ZW	17545593	3445	Z	Chr_Z	SJC_S000213	217068	Chr_Z	38	17	Z	Sha_scaffold1239	347083	Chr_Z	14	4.4	Z	S0	S0
Smp_145650	Chr_ZW	17508659	20347	Z	Chr_Z	SJC_S000213	217068	Chr_Z	38	17	Z	Sha_scaffold627	195226	Chr_Z	11	3.8	Z	S0	S0
Smp_145880	Chr_ZW	26423138	765	Z	Chr_Z	SJC_S001791	168667	Chr_Z	45	22	Z	Sha_scaffold4849	8945	Chr_Z	15	5	Z	S0	S0
Smp_146140	Chr_ZW	14056502	30088	Z	Chr_Z	SJC_S001635	32993	Chr_Z	43	23	Z	Sha_scaffold1864	47219	Chr_Z	12	4	Z	S0	S0
Smp_146160	Chr_ZW	13960161	45136	Z	Chr_Z	SJC_S001723	31063	Chr_Z	29	16	Z	Sha_scaffold764	252691	Chr_Z	13	4.1	Z	S0	S0
Smp_146180	Chr_ZW	13223814	8583	Z	Chr_Z	SJC_S025901	5443	Chr_Z	35	15	Z	Sha_scaffold470	207824	Chr_Z	14	4.4	Z	S0	S0
Smp_146200	Chr_ZW	13136766	9720	Z	Chr_Z	SJC_S026507	9792	Chr_Z	57	28	Z	Sha_scaffold2227	33884	Chr_Z	12	4.1	Z	S0	S0
Smp_147360	Chr_ZW	29198049	15507	Z	Chr_Z	SJC_S001451	50456	Chr_Z	36	18	Z	Sha_scaffold1268	520774	Chr_Z	13	4.3	Z	S0	S0
Smp_147370	Chr_ZW	29156851	11446	Z	Chr_Z	SJC_S001666	34688	Chr_Z	35	18	Z	Sha_scaffold1268	520774	Chr_Z	13	4.3	Z	S0	S0
Smp_147380	Chr_ZW	29080957	2169	Z	Chr_Z	SJC_S001675	35638	Chr_Z	31	15	Z	Sha_scaffold1268	520774	Chr_Z	13	4.3	Z	S0	S0
Smp_147390	Chr_ZW	29036128	30414	Z	Chr_Z	SJC_S001640	20067	Chr_Z	32	14	Z	Sha_scaffold1268	520774	Chr_Z	13	4.3	Z	S0	S0
Smp_147400	Chr_ZW	28974560	23219	Z	Chr_Z	SJC_S002266	58171	Chr_Z	32	16	Z	Sha_scaffold1268	520774	Chr_Z	13	4.3	Z	S0	S0
Smp_147440	Chr_ZW	28683196	11796	Z	Chr_Z	SJC_S001606	48419	Chr_Z	33	15	Z	Sha_scaffold1504	506468	Chr_Z	14	4.4	Z	S0	S0
Smp_147470	Chr_ZW	29298146	16124	Z	Chr_Z	SJC_S001388	42085	Chr_Z	37	17	Z	Sha_scaffold1268	520774	Chr_Z	13	4.3	Z	S0	S0
Smp_147500	Chr_ZW	29348720	3772	Z	Chr_Z	SJC_S007505	1413	Chr_Z	32	15	Z	Sha_scaffold1268	520774	Chr_Z	13	4.3	Z	S0	S0
Smp_147510	Chr_ZW	29358952	6261	Z	Chr_Z	SJC_S004429	15033	Chr_Z	31	16	Z	Sha_scaffold1268	520774	Chr_Z	13	4.3	Z	S0	S0
Smp_150770	Chr_ZW	16513845	72880	Z	Chr_Z	SJC_S008140	23310	Chr_Z	38	19	Z	Sha_scaffold271	336557	Chr_Z	14	4.4	Z	S0	S0
Smp_150780	Chr_ZW	16421848	22109	Z	Chr_Z	SJC_S000890	32953	Chr_Z	36	18	Z	Sha_scaffold271	336557	Chr_Z	14	4.4	Z	S0	S0
Smp_153750	Chr_ZW	12521443	682	Z	Chr_Z	SJC_S002477	40683	Chr_Z	35	18	Z	Sha_scaffold3453	45782	Chr_Z	12	4.1	Z	S0	S0
Smp_153760	Chr_ZW	12467916	41779	Z	Chr_Z	SJC_S003618	42956	Chr_Z	38	19	Z	Sha_scaffold4400	28162	Chr_Z	9.3	3	Z	S0	S0
Smp_153780	Chr_ZW	12306887	38454	Z	Chr_Z	SJC_S023587	9486	Chr_Z	32	16	Z	Sha_scaffold422	1179553	Chr_Z	14	4.4	Z	S0	S0
Smp_154030	Chr_ZW	14931823	15703	Z	Chr_Z	SJC_S001151	101019	Chr_Z	45	22	Z	Sha_scaffold369	224453	Chr_Z	12	3.9	Z	S0	S0
Smp_154370	Chr_ZW	24147259	3850	Z	Chr_Z	SJC_S002198	9349	Chr_Z	33	13	Z	Sha_scaffold59	264706	Chr_Z	13	4.2	Z	S0	S0
Smp_154400	Chr_ZW	23996561	48593	Z	Chr_Z	SJC_S000602	53458	Chr_Z	30	15	Z	Sha_scaffold59	264706	Chr_Z	13	4.2	Z	S0	S0
Smp_155360	Chr_ZW	30459010	2427	Z	Chr_Z	SJC_S000956	69402	Chr_Z	33	17	Z	Sha_scaffold1138	298986	Chr_Z	14	4.3	Z	S0	S0
Smp_155370	Chr_ZW	30411179	30965	Z	Chr_Z	SJC_S000956	69402	Chr_Z	33	17	Z	Sha_scaffold121	70593	Chr_Z	13	4.2	Z	S0	S0
Smp_155420	Chr_ZW	30223252	20380	Z	Chr_Z	SJC_S026039	6191	Chr_Z	36	17	Z	Sha_scaffold1504	506468	Chr_Z	14	4.4	Z	S0	S0
Smp_155430	Chr_ZW	30165320	20422	Z	Chr_Z	SJC_S005774	14232	Chr_Z	29	13	Z	Sha_scaffold1504	506468	Chr_Z	14	4.4	Z	S0	S0
Smp_155440	Chr_ZW	30161132	2840	Z	Chr_Z	SJC_S024639	3162	Chr_Z	32	14	Z	Sha_scaffold1504	506468	Chr_Z	14	4.4	Z	S0	S0
Smp_155450	Chr_ZW	30065471	51999	Z	Chr_Z	SJC_S009036	18332	Chr_Z	31	14	Z	Sha_scaffold1504	506468	Chr_Z	14	4.4	Z	S0	S0
Smp_159090	Chr_ZW	25062618	48961	Z	Chr_Z	SJC_S003465	8019	Chr_Z	31	13	Z	Sha_scaffold824	605303	Chr_Z	14	4.4	Z	S0	S0
Smp_159100	Chr_ZW	25148230	13945	Z	Chr_Z	SJC_S023770	8034	Chr_Z	34	16	Z	Sha_scaffold824	605303	Chr_Z	14	4.4	Z	S0	S0
Smp_159110	Chr_ZW	25358869	138520	Z	Chr_Z	SJC_S000886	42249	Chr_Z	51	25	Z	Sha_scaffold666	209300	Chr_Z	11	3.7	Z	S0	S0
Smp_164400	Chr_ZW	26246037	458	Z	Chr_Z	SJC_S003919	14150	Chr_Z	37	18	Z	Sha_scaffold2498	72265	Chr_Z	14	4.4	Z	S0	S0
Smp_164430	Chr_ZW	14206036	5925	Z	Chr_Z	SJC_S008462	26826	Chr_Z	35	18	Z	Sha_scaffold1526	100734	Chr_Z	12	4	Z	S0	S0
Smp_164440	Chr_ZW	14234008	3681	Z	Chr_Z	SJC_S005920	7439	Chr_Z	32	16	Z	Sha_scaffold3497	54079	Chr_Z	11	3.8	Z	S0	S0
Smp_164470	Chr_ZW	17438102	5637	Z	Chr_Z	SJC_S001712	51785	Chr_Z	35	17	Z	Sha_scaffold1239	347083	Chr_Z	14	4.4	Z	S0	S0
Smp_165220	Chr_ZW	24633278	6329	Z	Chr_Z	SJC_S000565	147778	Chr_Z	37	18	Z	Sha_scaffold1483	408413	Chr_Z	13	4.3	Z	S0	S0
Smp_165230	Chr_ZW	24719707	82801	Z	Chr_Z	SJC_S001492	32489	Chr_Z	37	17	Z	Sha_scaffold824	605303	Chr_Z	14	4.4	Z	S0	S0
Smp_165240	Chr_ZW	24825376	15201	Z	Chr_Z	SJC_S014254	1246	Chr_Z	37	18	Z	Sha_scaffold824	605303	Chr_Z	14	4.4	Z	S0	S0
Smp_165250	Chr_ZW	24848398	5248	Z	Chr_Z	SJC_S000440	78376	Chr_Z	36	18	Z	Sha_scaffold824	605303	Chr_Z	14	4.4	Z	S0	S0
Smp_165270	Chr_ZW	24972201	239	Z	Chr_Z	SJC_S020799	3995	Chr_Z	32	15	Z	Sha_scaffold824	605303	Chr_Z	14	4.4	Z	S0	S0
Smp_165430	Chr_ZW	26448269	43289	Z	Chr_Z	SJC_S007742	23725	Chr_Z	34	16	Z	Sha_scaffold2984	64991	Chr_Z	14	4.2	Z	S0	S0
Smp_165440	Chr_ZW	26573924	53569	Z	Chr_Z	SJC_S001558	51678	Chr_Z	30	14	Z	Sha_scaffold1385	224879	Chr_Z	15	4.6	Z	S0	S0
Smp_165460	Chr_ZW	26672339	10034	Z	Chr_Z	SJC_S001363	111548	Chr_Z	33	17	Z	Sha_scaffold1385	224879	Chr_Z	15	4.6	Z	S0	S0
Smp_165470	Chr_ZW	26716389	60851	Z	Chr_Z	SJC_S001363	111548	Chr_Z	33	17	Z	Sha_scaffold617	312176	Chr_Z	13	4.2	Z	S0	S0
Smp_165540	Chr_ZW	17054298	8742	Z	Chr_Z	SJC_S002499	22662	Chr_Z	39	21	Z	Sha_scaffold3384	36978	Chr_Z	9.7	3.1	Z	S0	S0
Smp_165550	Chr_ZW	17112939	17876	Z	Chr_Z	SJC_S002270	29258	Chr_Z	32	16	Z	Sha_scaffold5963	21287	Chr_Z	8	3	Z	S0	S0
Smp_165560	Chr_ZW	17198281	8914	Z	Chr_Z	SJC_S000213	217068	Chr_Z	38	17	Z	Sha_scaffold1239	347083	Chr_Z	14	4.4	Z	S0	S0
Smp_165580	Chr_ZW	17233560	29099	Z	Chr_Z	SJC_S008660	3783	Chr_Z	29	12	Z	Sha_scaffold1239	347083	Chr_Z	14	4.4	Z	S0	S0
Smp_165790	Chr_ZW	25662575	4255	Z	Chr_Z	SJC_S001100	9873	Chr_Z	39	19	Z	Sha_scaffold2388	64882	Chr_Z	13	4	Z	S0	S0
Smp_165800	Chr_ZW	25676723	87688	Z	Chr_Z	SJC_S026135	15375	Chr_Z	32	16	Z	Sha_scaffold1950	85379	Chr_Z	13	4.1	Z	S0	S0
Smp_165820	Chr_ZW	25791130	95770	Z	Chr_Z	SJC_S002450	22553	Chr_Z	35	17	Z	Sha_scaffold3624	128610	Chr_Z	14	4.4	Z	S0	S0
Smp_165830	Chr_ZW	25895590	6934	Z	Chr_Z	SJC_S001588	121741	Chr_Z	34	17	Z	Sha_scaffold1950	85379	Chr_Z	13	4.1	Z	S0	S0
Smp_165840	Chr_ZW	25902896	18599	Z	Chr_Z	SJC_S000599	24896	Chr_Z	42	22	Z	Sha_scaffold1950	85379	Chr_Z	13	4.1	Z	S0	S0
Smp_167860	Chr_ZW	12923010	51602	Z	Chr_Z	SJC_S002389	23378	Chr_Z	38	20	Z	Sha_scaffold3596	51740	Chr_Z	12	4	Z	S0	S0
Smp_167940	Chr_ZW	14249825	47468	Z	Chr_Z	SJC_S001934	17860	Chr_Z	57	29	Z	Sha_scaffold373	52682	Chr_Z	13	4.7	Z	S0	S0
Smp_167950	Chr_ZW	14324538	1720	Z	Chr_Z	SJC_S002422	8955	Chr_Z	31	17	Z	Sha_scaffold373	52682	Chr_Z	13	4.7	Z	S0	S0
Smp_168050	Chr_ZW	15449231	60442	Z	Chr_Z	SJC_S000888	17938	Chr_Z	36	18	Z	Sha_scaffold2556	279375	Chr_Z	14	4.3	Z	S0	S0
Smp_168060	Chr_ZW	15486123	5518	Z	Chr_Z	SJC_S003957	12028	Chr_Z	63	29	Z	Sha_scaffold2556	279375	Chr_Z	14	4.3	Z	S0	S0
Smp_170020	Chr_ZW	27330529	18116	Z	Chr_Z	SJC_S002951	9744	Chr_Z	30	14	Z	Sha_scaffold1517	416780	Chr_Z	14	4.4	Z	S0	S0
Smp_170030	Chr_ZW	27380866	1262	Z	Chr_Z	SJC_S000500	126336	Chr_Z	34	17	Z	Sha_scaffold1517	416780	Chr_Z	14	4.4	Z	S0	S0
Smp_170050	Chr_ZW	27404836	4359	Z	Chr_Z	SJC_S002378	5334	Chr_Z	37	20	Z	Sha_scaffold1517	416780	Chr_Z	14	4.4	Z	S0	S0
Smp_170070	Chr_ZW	27497596	4927	Z	Chr_Z	SJC_S007614	13457	Chr_Z	31	15	Z	Sha_scaffold1517	416780	Chr_Z	14	4.4	Z	S0	S0
Smp_170080	Chr_ZW	27576961	94545	Z	Chr_Z	SJC_S004006	54964	Chr_Z	31	15	Z	Sha_scaffold1517	416780	Chr_Z	14	4.4	Z	S0	S0
Smp_170100	Chr_ZW	27698388	43396	Z	Chr_Z	SJC_S000651	61452	Chr_Z	34	17	Z	Sha_scaffold2609	81274	Chr_Z	13	4.1	Z	S0	S0
Smp_171850	Chr_ZW	16320446	47282	Z	Chr_Z	SJC_S000441	101854	Chr_Z	36	18	Z	Sha_scaffold1844	231660	Chr_Z	14	4.4	Z	S0	S0
Smp_171860	Chr_ZW	16224775	35474	Z	Chr_Z	SJC_S002840	29751	Chr_Z	31	15	Z	Sha_scaffold1844	231660	Chr_Z	14	4.4	Z	S0	S0
Smp_171870	Chr_ZW	16178486	38647	Z	Chr_Z	SJC_S004485	30846	Chr_Z	38	19	Z	Sha_scaffold1844	231660	Chr_Z	14	4.4	Z	S0	S0
Smp_171880	Chr_ZW	16102913	52278	Z	Chr_Z	SJC_S000943	33831	Chr_Z	35	17	Z	Sha_scaffold621	110181	Chr_Z	14	4.7	Z	S0	S0
Smp_171900	Chr_ZW	16069789	17295	Z	Chr_Z	SJC_S001697	130467	Chr_Z	30	15	Z	Sha_scaffold621	110181	Chr_Z	14	4.7	Z	S0	S0
Smp_171920	Chr_ZW	16375992	12877	Z	Chr_Z	SJC_S000441	101854	Chr_Z	36	18	Z	Sha_scaffold1844	231660	Chr_Z	14	4.4	Z	S0	S0
Smp_171930	Chr_ZW	16009686	22925	Z	Chr_Z	SJC_S002923	5251	Chr_Z	95	46	Z	Sha_scaffold1156	205486	Chr_Z	13	4.1	Z	S0	S0
Smp_171940	Chr_ZW	15986956	5880	Z	Chr_Z	SJC_S024373	1119	Chr_Z	29	15	Z	Sha_scaffold1156	205486	Chr_Z	13	4.1	Z	S0	S0
Smp_171960	Chr_ZW	15911751	35474	Z	Chr_Z	SJC_S001346	40414	Chr_Z	34	17	Z	Sha_scaffold1156	205486	Chr_Z	13	4.1	Z	S0	S0
Smp_171970	Chr_ZW	15867563	38671	Z	Chr_Z	SJC_S006804	13218	Chr_Z	35	18	Z	Sha_scaffold1918	43038	Chr_Z	12	3.9	Z	S0	S0
Smp_172730	Chr_ZW	11230114	21111	Z	Chr_Z	SJC_S000608	155270	Chr_Z	32	15	Z	Sha_scaffold2447	262647	Chr_Z	14	4.4	Z	S0	S0
Smp_172810	Chr_ZW	27084066	20269	Z	Chr_Z	SJC_S002444	13311	Chr_Z	31	14	Z	Sha_scaffold1145	207737	Chr_Z	14	4.5	Z	S0	S0
Smp_172820	Chr_ZW	27023957	10595	Z	Chr_Z	SJC_S025765	9384	Chr_Z	37	19	Z	Sha_scaffold1145	207737	Chr_Z	14	4.5	Z	S0	S0
Smp_172860	Chr_ZW	16655072	2988	Z	Chr_Z	SJC_S010063	7551	Chr_Z	32	17	Z	Sha_scaffold271	336557	Chr_Z	14	4.4	Z	S0	S0
Smp_172870	Chr_ZW	16640897	440	Z	Chr_Z	SJC_S007059	11947	Chr_Z	31	16	Z	Sha_scaffold271	336557	Chr_Z	14	4.4	Z	S0	S0
Smp_173550	Chr_ZW	28248100	12525	Z	Chr_Z	SJC_S008078	6593	Chr_Z	38	16	Z	Sha_scaffold5931	17770	Chr_Z	13	3.8	Z	S0	S0
Smp_173900	Chr_ZW	27299699	3495	Z	Chr_Z	SJC_S000565	147778	Chr_Z	37	18	Z	Sha_scaffold6570	19210	Chr_Z	13	4	Z	S0	S0
Smp_174060	Chr_ZW	27840304	527	Z	Chr_Z	SJC_S024998	4941	Chr_Z	34	15	Z	Sha_scaffold1151	148286	Chr_Z	13	4.2	Z	S0	S0
Smp_174090	Chr_ZW	28028121	21729	Z	Chr_Z	SJC_S000807	184739	Chr_Z	35	17	Z	Sha_scaffold1483	408413	Chr_Z	13	4.3	Z	S0	S0
Smp_174110	Chr_ZW	27914049	76498	Z	Chr_Z	SJC_S007292	5411	Chr_Z	32	16	Z	Sha_scaffold1483	408413	Chr_Z	13	4.3	Z	S0	S0
Smp_174130	Chr_ZW	27899647	2851	Z	Chr_Z	SJC_S000651	61452	Chr_Z	34	17	Z	Sha_scaffold1483	408413	Chr_Z	13	4.3	Z	S0	S0
Smp_174210	Chr_ZW	18036935	98575	Z	Chr_Z	SJC_S000721	118070	Chr_Z	66	31	Z	Sha_scaffold1406	127494	Chr_Z	15	4.7	Z	S0	S0
Smp_174220	Chr_ZW	18166165	14754	Z	Chr_Z	SJC_S000783	114736	Chr_Z	31	16	Z	Sha_scaffold2240	47058	Chr_Z	10	3.7	Z	S0	S0
Smp_174230	Chr_ZW	18264210	102640	Z	Chr_Z	SJC_S000783	114736	Chr_Z	31	16	Z	Sha_scaffold1751	135328	Chr_Z	15	4.5	Z	S0	S0
Smp_174310	Chr_ZW	16677700	11747	Z	Chr_Z	SJC_S004438	17375	Chr_Z	35	17	Z	Sha_scaffold271	336557	Chr_Z	14	4.4	Z	S0	S0
Smp_174320	Chr_ZW	16794973	30315	Z	Chr_Z	SJC_S004847	26955	Chr_Z	35	16	Z	Sha_scaffold2059	271576	Chr_Z	14	4.5	Z	S0	S0
Smp_174350	Chr_ZW	16893740	9421	Z	Chr_Z	SJC_S025679	3977	Chr_Z	33	15	Z	Sha_scaffold2059	271576	Chr_Z	14	4.5	Z	S0	S0
Smp_174890	Chr_ZW	14619599	13819	Z	Chr_Z	SJC_S002532	74668	Chr_Z	32	17	Z	Sha_scaffold452	276764	Chr_Z	14	4.4	Z	S0	S0
Smp_174910	Chr_ZW	14744995	38158	Z	Chr_Z	SJC_S001787	56136	Chr_Z	36	19	Z	Sha_scaffold470	207824	Chr_Z	14	4.4	Z	S0	S0
Smp_174920	Chr_ZW	14794641	14504	Z	Chr_Z	SJC_S001471	6807	Chr_Z	37	15	Z	Sha_scaffold470	207824	Chr_Z	14	4.4	Z	S0	S0
Smp_174930	Chr_ZW	14852234	4994	Z	Chr_Z	SJC_S000164	168473	Chr_Z	39	21	Z	Sha_scaffold3986	9469	Chr_Z	14	4.3	Z	S0	S0
Smp_174940	Chr_ZW	14850251	289	Z	Chr_Z	SJC_S000164	168473	Chr_Z	39	21	Z	Sha_scaffold3986	9469	Chr_Z	14	4.3	Z	S0	S0
Smp_174960	Chr_ZW	14881150	27219	Z	Chr_Z	SJC_S004178	21921	Chr_Z	41	20	Z	Sha_scaffold6477	22263	Chr_Z	12	4.1	Z	S0	S0
Smp_175100	Chr_ZW	14342221	18558	Z	Chr_Z	SJC_S001394	61049	Chr_Z	36	17	Z	Sha_scaffold5129	40298	Chr_Z	13	4.1	Z	S0	S0
Smp_177540	Chr_ZW	18604520	4697	Z	Chr_Z	SJC_S003580	7406	Chr_Z	34	15	Z	Sha_scaffold2736	317484	Chr_Z	14	4.4	Z	S0	S0
Smp_178480	Chr_ZW	17637156	1905	Z	Chr_Z	SJC_S001278	46594	Chr_Z	39	19	Z	Sha_scaffold627	195226	Chr_Z	11	3.8	Z	S0	S0
Smp_178740	Chr_ZW	26328618	6505	Z	Chr_Z	SJC_S001791	168667	Chr_Z	45	22	Z	Sha_scaffold2601	23949	Chr_Z	11	3.7	Z	S0	S0
Smp_178750	Chr_ZW	26335933	26267	Z	Chr_Z	SJC_S001791	168667	Chr_Z	45	22	Z	Sha_scaffold4006	23224	Chr_Z	12	3.9	Z	S0	S0
Smp_178780	Chr_ZW	24978092	25513	Z	Chr_Z	SJC_S004730	9768	Chr_Z	35	17	Z	Sha_scaffold824	605303	Chr_Z	14	4.4	Z	S0	S0
Smp_179020	Chr_ZW	17026286	3443	Z	Chr_Z	SJC_S001539	11605	Chr_Z	30	15	Z	Sha_scaffold102	48603	Chr_Z	14	4.4	Z	S0	S0
Smp_179600	Chr_ZW	26806529	1297	Z	Chr_Z	SJC_S027817	1293	Chr_Z	37	18	Z	Sha_scaffold617	312176	Chr_Z	13	4.2	Z	S0	S0
Smp_179610	Chr_ZW	26827523	24913	Z	Chr_Z	SJC_S001871	33717	Chr_Z	30	15	Z	Sha_scaffold617	312176	Chr_Z	13	4.2	Z	S0	S0
Smp_179620	Chr_ZW	26853871	7839	Z	Chr_Z	SJC_S003218	28759	Chr_Z	31	16	Z	Sha_scaffold617	312176	Chr_Z	13	4.2	Z	S0	S0
Smp_179720	Chr_ZW	28090501	30469	Z	Chr_Z	SJC_S000807	184739	Chr_Z	35	17	Z	Sha_scaffold1483	408413	Chr_Z	13	4.3	Z	S0	S0
Smp_180000	Chr_ZW	26921840	644	Z	Chr_Z	SJC_S001674	27754	Chr_Z	33	17	Z	Sha_C10145608	2201	Chr_Z	12	6.4	Z	S0	S0
Smp_180060	Chr_ZW	17278694	14099	Z	Chr_Z	SJC_S001045	37533	Chr_Z	42	21	Z	Sha_scaffold1239	347083	Chr_Z	14	4.4	Z	S0	S0
Smp_180070	Chr_ZW	28212967	11925	Z	Chr_Z	SJC_S001593	57105	Chr_Z	34	16	Z	Sha_scaffold1483	408413	Chr_Z	13	4.3	Z	S0	S0
Smp_180080	Chr_ZW	28159958	32711	Z	Chr_Z	SJC_S003885	10645	Chr_Z	32	16	Z	Sha_scaffold1483	408413	Chr_Z	13	4.3	Z	S0	S0
Smp_181900	Chr_ZW	16933384	143	Z	Chr_Z	SJC_S001101	19101	Chr_Z	37	18	Z	Sha_scaffold771	89710	Chr_Z	14	4.6	Z	S0	S0
Smp_182620	Chr_ZW	15591794	428	Z	Chr_Z	SJC_S001141	17652	Chr_Z	33	17	Z	Sha_scaffold1089	240715	Chr_Z	14	4.4	Z	S0	S0
Smp_187540	Chr_ZW	30190864	2403	Z	Chr_Z	SJC_S007255	7940	Chr_Z	31	14	Z	Sha_scaffold1504	506468	Chr_Z	14	4.4	Z	S0	S0
Smp_187740	Chr_ZW	11165398	571	Z	Chr_Z	SJC_S025135	3768	Chr_Z	80	25	Z	Sha_scaffold2447	262647	Chr_Z	14	4.4	Z	S0	S0
Smp_187920	Chr_ZW	15681420	314	Z	Chr_Z	SJC_S001911	28026	Chr_Z	34	15	Z	Sha_scaffold1089	240715	Chr_Z	14	4.4	Z	S0	S0
Smp_192000	Chr_ZW	16418541	1918	Z	Chr_Z	SJC_S025188	1896	Chr_Z	56	27	Z	Sha_scaffold6238	18891	Chr_Z	14	4.4	Z	S0	S0
Smp_193390	Chr_ZW	14329609	1180	Z	Chr_Z	SJC_S008035	3315	Chr_Z	39	20	Z	Sha_scaffold5129	40298	Chr_Z	13	4.1	Z	S0	S0
Smp_193440	Chr_ZW	26896077	19192	Z	Chr_Z	SJC_S001674	27754	Chr_Z	33	17	Z	Sha_scaffold617	312176	Chr_Z	13	4.2	Z	S0	S0
Smp_193600	Chr_ZW	29072411	406	Z	Chr_Z	SJC_S001675	35638	Chr_Z	31	15	Z	Sha_scaffold1268	520774	Chr_Z	13	4.3	Z	S0	S0
Smp_196110	Chr_ZW	29234416	17265	Z	Chr_Z	SJC_S008244	15333	Chr_Z	34	17	Z	Sha_scaffold1268	520774	Chr_Z	13	4.3	Z	S0	S0
Smp_203480	Chr_ZW	16965545	12832	Z	Chr_Z	SJC_S001938	14064	Chr_Z	37	19	Z	Sha_scaffold771	89710	Chr_Z	14	4.6	Z	S0	S0
Smp_203500	Chr_ZW	18466353	1190	Z	Chr_Z	SJC_S007860	13581	Chr_Z	34	15	Z	Sha_scaffold2736	317484	Chr_Z	14	4.4	Z	S0	S0
Smp_203560	Chr_ZW	24531148	149	Z	Chr_Z	SJC_S026172	10059	Chr_Z	31	13	Z	Sha_scaffold737	171283	Chr_Z	13	4.2	Z	S0	S0
Smp_203590	Chr_ZW	27444843	3229	Z	Chr_Z	SJC_S002068	14978	Chr_Z	32	16	Z	Sha_scaffold1517	416780	Chr_Z	14	4.4	Z	S0	S0
Smp_203610	Chr_ZW	28901189	468	Z	Chr_Z	SJC_S007950	12524	Chr_Z	33	16	Z	Sha_scaffold1268	520774	Chr_Z	13	4.3	Z	S0	S0
Smp_204120	Chr_ZW	23678590	3725	Z	Chr_Z	SJC_S001746	28864	Chr_Z	31	16	Z	Sha_scaffold155	130586	Chr_Z	13	4	Z	S0	S0
Smp_204130	Chr_ZW	23925135	547	Z	Chr_Z	SJC_S000594	261777	Chr_Z	34	16	Z	Sha_scaffold59	264706	Chr_Z	13	4.2	Z	S0	S0
Smp_204160	Chr_ZW	25035104	986	Z	Chr_Z	SJC_S018551	1716	Chr_Z	24	12	Z	Sha_scaffold824	605303	Chr_Z	14	4.4	Z	S0	S0
Smp_207000	Chr_ZW	13053826	5753	Z	Chr_Z	SJC_S000944	56755	Chr_Z	76	26	Z	Sha_scaffold658	69623	Chr_Z	12	4	Z	S0	S0
Smp_209030	Chr_ZW	13895682	11841	Z	Chr_Z	SJC_S001151	101019	Chr_Z	45	22	Z	Sha_scaffold764	252691	Chr_Z	13	4.1	Z	S0	S0
Smp_209040	Chr_ZW	15449231	79851	Z	Chr_Z	SJC_S000520	70875	Chr_Z	41	20	Z	Sha_scaffold1421	49644	Chr_Z	14	4.3	Z	S0	S0
Smp_209050	Chr_ZW	17035580	27460	Z	Chr_Z	SJC_S002425	19764	Chr_Z	30	15	Z	Sha_scaffold102	48603	Chr_Z	14	4.4	Z	S0	S0
Smp_210550	Chr_ZW	28379931	10617	Z	Chr_Z	SJC_S000565	147778	Chr_Z	37	18	Z	Sha_scaffold2343	56973	Chr_Z	13	3.9	Z	S0	S0
Smp_210580	Chr_ZW	28131230	7856	Z	Chr_Z	SJC_S000807	184739	Chr_Z	35	17	Z	Sha_scaffold1483	408413	Chr_Z	13	4.3	Z	S0	S0
Smp_210590	Chr_ZW	28153824	3961	Z	Chr_Z	SJC_S023794	6282	Chr_Z	35	14	Z	Sha_scaffold1483	408413	Chr_Z	13	4.3	Z	S0	S0
Smp_210860	Chr_ZW	27775793	46785	Z	Chr_Z	SJC_S025785	3186	Chr_Z	33	15	Z	Sha_scaffold1151	148286	Chr_Z	13	4.2	Z	S0	S0
Smp_210940	Chr_ZW	13280463	21401	Z	Chr_Z	SJC_S001864	26921	Chr_Z	33	17	Z	Sha_scaffold764	252691	Chr_Z	13	4.1	Z	S0	S0
Smp_210950	Chr_ZW	13304777	20796	Z	Chr_Z	SJC_S000164	168473	Chr_Z	39	21	Z	Sha_scaffold764	252691	Chr_Z	13	4.1	Z	S0	S0
Smp_210960	Chr_ZW	28293173	14753	Z	Chr_Z	SJC_S000807	184739	Chr_Z	35	17	Z	Sha_scaffold2363	48711	Chr_Z	13	4.2	Z	S0	S0
Smp_044610	Chr_ZW	12854272	329	Z	Chr_Z	SJC_S001643	18354	Chr_Z	27	15	Z	n.a.	n.a.	n.a.	n.a.	n.a.	n.a.	S0	S0
Smp_091010	Chr_ZW	16343044	4583	Z	Chr_Z	SJC_S001346	40414	Chr_Z	34	17	Z	n.a.	n.a.	n.a.	n.a.	n.a.	n.a.	S0	S0
Smp_093740	Chr_ZW	25416472	21594	Z	Chr_Z	SJC_S002618	24318	Chr_Z	30	15	Z	Sha_scaffold1591	n.a.	Chr_Z	n.a.	n.a.	n.a.	S0	S0
Smp_093750	Chr_ZW	25399385	9668	Z	Chr_Z	SJC_S000886	42249	Chr_Z	51	25	Z	Sha_scaffold1591	n.a.	Chr_Z	n.a.	n.a.	n.a.	S0	S0
Smp_114910	Chr_ZW	15936079	218	Z	Chr_Z	SJC_S001346	40414	Chr_Z	34	17	Z	n.a.	n.a.	n.a.	n.a.	n.a.	n.a.	S0	S0
Smp_118020	Chr_ZW	27414052	158	Z	Chr_Z	SJC_S005718	7437	Chr_Z	32	16	Z	n.a.	n.a.	n.a.	n.a.	n.a.	n.a.	S0	S0
Smp_128640	Chr_ZW	18905004	16007	Z	Chr_Z	SJC_S007280	3979	Chr_Z	36	15	Z	n.a.	n.a.	n.a.	n.a.	n.a.	n.a.	S0	S0
Smp_147410	Chr_ZW	28922651	19147	Z	Chr_Z	SJC_S007950	12524	Chr_Z	33	16	Z	n.a.	n.a.	n.a.	n.a.	n.a.	n.a.	S0	S0
Smp_175090	Chr_ZW	14384750	51471	Z	Chr_Z	SJC_S001390	34737	Chr_Z	37	17	Z	Sha_scaffold3004	n.a.	Chr_Z	n.a.	n.a.	n.a.	S0	S0
Smp_177730	Chr_ZW	15462229	841	Z	Chr_Z	SJC_S000888	17938	Chr_Z	36	18	Z	n.a.	n.a.	n.a.	n.a.	n.a.	n.a.	S0	S0
Smp_193530	Chr_ZW	15566386	146	Z	Chr_Z	SJC_S002062	13146	Chr_Z	31	15	Z	n.a.	n.a.	n.a.	n.a.	n.a.	n.a.	S0	S0
Smp_011740	Chr_ZW	23651589	7421	Z	Chr_Z	SJC_S000649	67362	Chr_Z	36	19	Z	Sha_C10100277	1481	Chr_Z	60	19	Autosome	S0	S0
Smp_037200	Chr_ZW	15541091	2278	Z	Chr_Z	SJC_S002527	48719	Chr_Z	33	18	Z	Sha_C10118659	1711	Chr_Z	24	7.7	Autosome	S0	S0
Smp_096180	Chr_ZW	14858661	410	Z	Chr_Z	SJC_S000164	168473	Chr_Z	39	21	Z	Sha_C9995187	798	Chr_Z	24	7.1	Autosome	S0	S0
Smp_145870	Chr_ZW	26408079	14540	Z	Chr_Z	SJC_S001791	168667	Chr_Z	45	22	Z	Sha_scaffold5959	5634	Chr_Z	24	6.5	Autosome	S0	S0
Smp_186740	Chr_ZW	14842925	754	Z	Chr_Z	SJC_S000164	168473	Chr_Z	39	21	Z	Sha_scaffold7334	6572	Chr_Z	19	6	Autosome	S0	S0
Smp_047330	Chr_ZW	29503387	9128	Z	Chr_Z	SJC_S004813	4247	Chr_Z	36	17	Z	Sha_scaffold1006	744907	Chr_Z	16	5.2	Ambiguous	S0	S0
Smp_059870	Chr_ZW	24227886	6883	Z	Chr_Z	SJC_S000594	261777	Chr_Z	34	16	Z	Sha_scaffold1179	42879	Chr_Z	17	5.5	Ambiguous	S0	S0
Smp_059880	Chr_ZW	24216002	11748	Z	Chr_Z	SJC_S000594	261777	Chr_Z	34	16	Z	Sha_scaffold1179	42879	Chr_Z	17	5.5	Ambiguous	S0	S0
Smp_061920	Chr_ZW	29968850	5458	Z	Chr_Z	SJC_S000505	163621	Chr_Z	32	16	Z	Sha_scaffold6948	7890	Chr_Z	17	5.8	Ambiguous	S0	S0
Smp_061970	Chr_ZW	29898330	4575	Z	Chr_Z	SJC_S000505	163621	Chr_Z	32	16	Z	Sha_scaffold1006	744907	Chr_Z	16	5.2	Ambiguous	S0	S0
Smp_066770	Chr_ZW	29690298	11010	Z	Chr_Z	SJC_S001644	22819	Chr_Z	33	16	Z	Sha_scaffold1006	744907	Chr_Z	16	5.2	Ambiguous	S0	S0
Smp_115450	Chr_ZW	29757043	974	Z	Chr_Z	SJC_S026757	3086	Chr_Z	39	19	Z	Sha_scaffold1006	744907	Chr_Z	16	5.2	Ambiguous	S0	S0
Smp_147540	Chr_ZW	29479515	7345	Z	Chr_Z	SJC_S005515	12011	Chr_Z	32	17	Z	Sha_scaffold1006	744907	Chr_Z	16	5.2	Ambiguous	S0	S0
Smp_151690	Chr_ZW	29778749	455	Z	Chr_Z	SJC_S001216	28137	Chr_Z	30	14	Z	Sha_scaffold1006	744907	Chr_Z	16	5.2	Ambiguous	S0	S0
Smp_155490	Chr_ZW	29863144	24665	Z	Chr_Z	SJC_S000505	163621	Chr_Z	32	16	Z	Sha_scaffold1006	744907	Chr_Z	16	5.2	Ambiguous	S0	S0
Smp_155500	Chr_ZW	29824014	25192	Z	Chr_Z	SJC_S002750	15402	Chr_Z	32	17	Z	Sha_scaffold1006	744907	Chr_Z	16	5.2	Ambiguous	S0	S0
Smp_158290	Chr_ZW	29740787	7759	Z	Chr_Z	SJC_S008553	14819	Chr_Z	40	17	Z	Sha_scaffold1006	744907	Chr_Z	16	5.2	Ambiguous	S0	S0
Smp_158300	Chr_ZW	29635121	53959	Z	Chr_Z	SJC_S000891	56090	Chr_Z	35	17	Z	Sha_scaffold1006	744907	Chr_Z	16	5.2	Ambiguous	S0	S0
Smp_158310	Chr_ZW	29592046	30566	Z	Chr_Z	SJC_S001223	29923	Chr_Z	37	19	Z	Sha_scaffold1006	744907	Chr_Z	16	5.2	Ambiguous	S0	S0
Smp_203570	Chr_ZW	26395902	5287	Z	Chr_Z	SJC_S001791	168667	Chr_Z	45	22	Z	Sha_scaffold1998	21055	Chr_Z	16	5.2	Ambiguous	S0	S0
Smp_210900	Chr_ZW	29779260	11997	Z	Chr_Z	SJC_S001490	4980	Chr_Z	36	15	Z	Sha_scaffold1006	744907	Chr_Z	16	5.2	Ambiguous	S0	S0
Smp_210910	Chr_ZW	29792394	410	Z	Chr_Z	SJC_S017104	1384	Chr_Z	30	12	Z	Sha_scaffold1006	744907	Chr_Z	16	5.2	Ambiguous	S0	S0
Smp_009710	SC_0187	137555	29716	Z	Chr_newZ	SJC_S001797	51916	Chr_newZ	31	15	Z	Sha_scaffold33	96926	Chr_newZ	13	4.1	Z	n.a.	S0
Smp_012070	Chr_ZW	18800757	778	Z	Chr_Z	SJC_S000698	111844	Chr_UP	53	29	Z	Sha_scaffold6	200389	Chr_Z	13	4.1	Z	n.a.	S0
Smp_013560	SC_0187	169659	1268	Z	Chr_newZ	SJC_S006070	9234	Chr_newZ	27	14	Z	Sha_scaffold33	96926	Chr_newZ	13	4.1	Z	n.a.	S0
Smp_019630	SC_0187	243174	10762	Z	Chr_newZ	SJC_S007954	19097	Chr_newZ	29	15	Z	Sha_scaffold963	142638	Chr_newZ	14	4.3	Z	n.a.	S0
Smp_019640	SC_0187	279403	4185	Z	Chr_newZ	SJC_S002192	13397	Chr_newZ	30	15	Z	Sha_scaffold963	142638	Chr_newZ	14	4.3	Z	n.a.	S0
Smp_019680	SC_0187	380931	12542	Z	Chr_newZ	SJC_S001183	66777	Chr_newZ	37	19	Z	Sha_scaffold2400	51627	Chr_newZ	14	4.3	Z	n.a.	S0
Smp_019730	SC_0187	516600	3511	Z	Chr_newZ	SJC_S000598	89916	Chr_newZ	34	15	Z	Sha_scaffold535	220865	Chr_newZ	13	4.2	Z	n.a.	S0
Smp_019750	SC_0136	36657	785	Z	Chr_newZ	SJC_S002991	24485	Chr_newZ	30	15	Z	Sha_scaffold535	220865	Chr_newZ	13	4.2	Z	n.a.	S0
Smp_019760	SC_0136	44253	25205	Z	Chr_newZ	SJC_S002991	24485	Chr_newZ	30	15	Z	Sha_scaffold535	220865	Chr_newZ	13	4.2	Z	n.a.	S0
Smp_019790	SC_0136	209761	28983	Z	Chr_newZ	SJC_S001848	43566	Chr_newZ	63	30	Z	Sha_scaffold1902	58617	Chr_newZ	12	4	Z	n.a.	S0
Smp_019820	SC_0136	368698	7696	Z	Chr_newZ	SJC_S000779	52105	Chr_newZ	36	19	Z	Sha_scaffold1503	27476	Chr_newZ	11	3.6	Z	n.a.	S0
Smp_019840	SC_0136	392074	18501	Z	Chr_newZ	SJC_S001848	43566	Chr_newZ	63	30	Z	Sha_scaffold2344	47851	Chr_newZ	13	4	Z	n.a.	S0
Smp_021460	SC_0129	26907	11508	Z	Chr_newZ	SJC_S004292	14267	Chr_newZ	34	17	Z	Sha_scaffold6831	9060	Chr_newZ	13	4.2	Z	n.a.	S0
Smp_037700	SC_0136	604105	2497	Z	Chr_newZ	SJC_S004474	21623	Chr_newZ	39	19	Z	Sha_scaffold1558	68615	Chr_newZ	12	3.9	Z	n.a.	S0
Smp_059240	SC_0129	855156	3973	Z	Chr_newZ	SJC_S010120	5922	Chr_newZ	30	16	Z	Sha_scaffold2983	42172	Chr_newZ	9	3	Z	n.a.	S0
Smp_059340	SC_0129	709946	7012	Z	Chr_newZ	SJC_S027827	5685	Chr_newZ	34	18	Z	Sha_scaffold1288	191514	Chr_newZ	12	4.2	Z	n.a.	S0
Smp_059350	SC_0129	700637	4646	Z	Chr_newZ	SJC_S002537	34436	Chr_newZ	38	19	Z	Sha_scaffold1288	191514	Chr_newZ	12	4.2	Z	n.a.	S0
Smp_059360	SC_0129	674608	9075	Z	Chr_newZ	SJC_S002537	34436	Chr_newZ	38	19	Z	Sha_scaffold1288	191514	Chr_newZ	12	4.2	Z	n.a.	S0
Smp_066410	SC_0136	538662	9783	Z	Chr_newZ	SJC_S004087	39113	Chr_newZ	50	26	Z	Sha_scaffold1558	68615	Chr_newZ	12	3.9	Z	n.a.	S0
Smp_066430	SC_0136	642679	803	Z	Chr_newZ	SJC_S000438	93289	Chr_newZ	36	18	Z	Sha_scaffold538	90264	Chr_newZ	12	4	Z	n.a.	S0
Smp_078030	SC_0129	742150	1559	Z	Chr_newZ	SJC_S001027	157483	Chr_newZ	63	35	Z	Sha_scaffold3786	21420	Chr_newZ	11	3.8	Z	n.a.	S0
Smp_078050	SC_0111	269394	5865	Z	Chr_newZ	SJC_S008437	13865	Chr_newZ	38	21	Z	Sha_scaffold164	326698	Chr_newZ	14	4.4	Z	n.a.	S0
Smp_078060	SC_0111	353408	1941	Z	Chr_newZ	SJC_S000895	12238	Chr_newZ	33	14	Z	Sha_scaffold164	326698	Chr_newZ	14	4.4	Z	n.a.	S0
Smp_080920	Chr_ZW	25557137	3913	Z	Chr_Z	SJC_S001162	42157	Chr_UP	57	28	Z	Sha_scaffold666	209300	Chr_Z	11	3.7	Z	n.a.	S0
Smp_082120	SC_0111	641087	24698	Z	Chr_newZ	SJC_S001631	34554	Chr_newZ	35	18	Z	Sha_scaffold1545	88689	Chr_newZ	14	4.4	Z	n.a.	S0
Smp_091820	Chr_1.unplaced.SC_0034	1844080	14108	Z	Chr_newZ	SJC_S007725	23128	Chr_newZ	32	16	Z	Sha_scaffold2149	45666	Chr_newZ	15	4.8	Z	n.a.	S0
Smp_093820	SC_0136	313471	15379	Z	Chr_newZ	SJC_S008134	13613	Chr_newZ	36	17	Z	Sha_scaffold6845	14319	Chr_newZ	14	4.5	Z	n.a.	S0
Smp_093830	SC_0136	308016	737	Z	Chr_newZ	SJC_S000781	103614	Chr_newZ	36	17	Z	Sha_scaffold2596	37909	Chr_newZ	14	4.6	Z	n.a.	S0
Smp_095250	SC_0111	599718	684	Z	Chr_newZ	SJC_S000858	87466	Chr_newZ	33	16	Z	Sha_scaffold1143	220366	Chr_newZ	14	4.2	Z	n.a.	S0
Smp_095290	SC_0111	417904	24524	Z	Chr_newZ	SJC_S003510	9007	Chr_newZ	36	16	Z	Sha_scaffold1143	220366	Chr_newZ	14	4.2	Z	n.a.	S0
Smp_096160	Chr_ZW	14812702	14577	Z	Chr_Z	SJC_S003006	30058	Chr_UP	34	16	Z	Sha_scaffold470	207824	Chr_Z	14	4.4	Z	n.a.	S0
Smp_096210	SC_0341	39642	1978	Z	Chr_newZ	SJC_S001151	101019	Chr_Z	45	22	Z	Sha_scaffold369	224453	Chr_Z	12	3.9	Z	n.a.	S0
Smp_103420	SC_0129	584551	10176	Z	Chr_newZ	SJC_S003207	11107	Chr_newZ	32	15	Z	Sha_scaffold1288	191514	Chr_newZ	12	4.2	Z	n.a.	S0
Smp_103460	SC_0129	409064	15938	Z	Chr_newZ	SJC_S001027	157483	Chr_newZ	63	35	Z	Sha_scaffold755	86879	Chr_newZ	13	4.2	Z	n.a.	S0
Smp_103470	SC_0129	402411	1433	Z	Chr_newZ	SJC_S003901	16615	Chr_newZ	30	16	Z	Sha_scaffold755	86879	Chr_newZ	13	4.2	Z	n.a.	S0
Smp_103920	SC_0129	367412	9916	Z	Chr_newZ	SJC_S001240	16923	Chr_newZ	33	16	Z	Sha_scaffold251	24103	Chr_newZ	14	4.6	Z	n.a.	S0
Smp_103930	SC_0129	378195	3855	Z	Chr_newZ	SJC_S004781	23653	Chr_newZ	36	19	Z	Sha_scaffold251	24103	Chr_newZ	14	4.6	Z	n.a.	S0
Smp_114390	Chr_1.unplaced.SC_0034	1921159	383	Z	Chr_newZ	SJC_S007725	23128	Chr_newZ	32	16	Z	Sha_scaffold5680	3803	Chr_newZ	13	3.7	Z	n.a.	S0
Smp_119020	SC_0136	433034	709	Z	Chr_newZ	SJC_S007228	1935	Chr_newZ	33	17	Z	Sha_scaffold1899	19563	Chr_newZ	12	4.2	Z	n.a.	S0
Smp_121160	SC_0278	57257	13029	Z	Chr_newZ	SJC_S027121	5982	Chr_newZ	30	14	Z	Sha_scaffold3266	82762	Chr_newZ	13	4.1	Z	n.a.	S0
Smp_121190	SC_0136	820052	17921	Z	Chr_newZ	SJC_S009218	4472	Chr_newZ	61	28	Z	Sha_scaffold1618	152570	Chr_newZ	13	4	Z	n.a.	S0
Smp_127250	SC_0187	1066	26082	Z	Chr_newZ	SJC_S005535	17950	Chr_newZ	34	16	Z	Sha_scaffold2059	271576	Chr_Z	14	4.5	Z	n.a.	S0
Smp_127270	SC_0187	53747	9311	Z	Chr_newZ	SJC_S001797	51916	Chr_newZ	31	15	Z	Sha_scaffold2059	271576	Chr_Z	14	4.5	Z	n.a.	S0
Smp_127280	SC_0187	91254	43147	Z	Chr_newZ	SJC_S005721	9359	Chr_newZ	36	17	Z	Sha_scaffold33	96926	Chr_newZ	13	4.1	Z	n.a.	S0
Smp_132920	SC_0187	295812	55354	Z	Chr_newZ	SJC_S001183	66777	Chr_newZ	37	19	Z	Sha_scaffold963	142638	Chr_newZ	14	4.3	Z	n.a.	S0
Smp_132930	SC_0187	408719	61357	Z	Chr_newZ	SJC_S007710	30521	Chr_newZ	32	15	Z	Sha_scaffold2400	51627	Chr_newZ	14	4.3	Z	n.a.	S0
Smp_132940	SC_0136	10446	22669	Z	Chr_newZ	SJC_S008144	8742	Chr_newZ	35	18	Z	Sha_scaffold535	220865	Chr_newZ	13	4.2	Z	n.a.	S0
Smp_132950	SC_0136	115096	371	Z	Chr_newZ	SJC_S000781	103614	Chr_newZ	36	17	Z	Sha_scaffold535	220865	Chr_newZ	13	4.2	Z	n.a.	S0
Smp_132970	SC_0136	131586	4196	Z	Chr_newZ	SJC_S000781	103614	Chr_newZ	36	17	Z	Sha_scaffold535	220865	Chr_newZ	13	4.2	Z	n.a.	S0
Smp_133000	SC_0136	420251	1181	Z	Chr_newZ	SJC_S002517	10165	Chr_newZ	47	25	Z	Sha_scaffold2344	47851	Chr_newZ	13	4	Z	n.a.	S0
Smp_133010	SC_0136	421873	2840	Z	Chr_newZ	SJC_S002517	10165	Chr_newZ	47	25	Z	Sha_scaffold2344	47851	Chr_newZ	13	4	Z	n.a.	S0
Smp_133800	SC_0129	5472	3036	Z	Chr_newZ	SJC_S005373	4038	Chr_newZ	34	16	Z	Sha_scaffold1011	202521	Chr_newZ	13	4.2	Z	n.a.	S0
Smp_154000	SC_0129	798121	17924	Z	Chr_newZ	SJC_S007856	18849	Chr_newZ	45	22	Z	Sha_scaffold2034	98642	Chr_newZ	13	4.6	Z	n.a.	S0
Smp_154060	SC_0129	603107	19102	Z	Chr_newZ	SJC_S003587	9593	Chr_newZ	34	16	Z	Sha_scaffold1288	191514	Chr_newZ	12	4.2	Z	n.a.	S0
Smp_155400	Chr_ZW	30315020	25855	Z	Chr_Z	SJC_S000108	296063	Chr_UP	33	17	Z	Sha_scaffold1707	84947	Chr_UP	13	4.2	Z	n.a.	S0
Smp_155410	Chr_ZW	30284678	24565	Z	Chr_Z	SJC_S000108	296063	Chr_UP	33	17	Z	Sha_scaffold1828	58446	Chr_Z	13	4.2	Z	n.a.	S0
Smp_155470	Chr_ZW	30019564	2507	Z	Chr_Z	SJC_S004482	12564	Chr_UP	37	16	Z	Sha_scaffold1504	506468	Chr_Z	14	4.4	Z	n.a.	S0
Smp_157610	SC_0136	271054	6853	Z	Chr_newZ	SJC_S000781	103614	Chr_newZ	36	17	Z	Sha_scaffold2596	37909	Chr_newZ	14	4.6	Z	n.a.	S0
Smp_158030	SC_0136	723605	26760	Z	Chr_newZ	SJC_S014316	3835	Chr_newZ	39	20	Z	Sha_scaffold538	90264	Chr_newZ	12	4	Z	n.a.	S0
Smp_158050	SC_0136	511777	23407	Z	Chr_newZ	SJC_S004087	39113	Chr_newZ	50	26	Z	Sha_scaffold1558	68615	Chr_newZ	12	3.9	Z	n.a.	S0
Smp_158070	SC_0136	647658	4693	Z	Chr_newZ	SJC_S000438	93289	Chr_newZ	36	18	Z	Sha_scaffold538	90264	Chr_newZ	12	4	Z	n.a.	S0
Smp_158080	SC_0136	663616	230	Z	Chr_newZ	SJC_S000438	93289	Chr_newZ	36	18	Z	Sha_scaffold538	90264	Chr_newZ	12	4	Z	n.a.	S0
Smp_164220	Chr_1.unplaced.SC_0034	2327343	19301	Z	Chr_newZ	SJC_S004038	8566	Chr_newZ	30	13	Z	Sha_scaffold1870	89605	Chr_UP	12	3.6	Z	n.a.	S0
Smp_164260	SC_0111	297356	26092	Z	Chr_newZ	SJC_S008133	24675	Chr_newZ	30	14	Z	Sha_scaffold164	326698	Chr_newZ	14	4.4	Z	n.a.	S0
Smp_164740	SC_0234	100919	6313	Z	Chr_newZ	SJC_S007626	5087	Chr_newZ	32	12	Z	Sha_scaffold815	188422	Chr_newZ	12	3.9	Z	n.a.	S0
Smp_164760	SC_0234	135610	29432	Z	Chr_newZ	SJC_S003722	18771	Chr_newZ	35	17	Z	Sha_scaffold815	188422	Chr_newZ	12	3.9	Z	n.a.	S0
Smp_164770	SC_0234	171525	34488	Z	Chr_newZ	SJC_S008189	7442	Chr_newZ	40	18	Z	Sha_scaffold815	188422	Chr_newZ	12	3.9	Z	n.a.	S0
Smp_164780	SC_0234	217832	13999	Z	Chr_newZ	SJC_S003830	17885	Chr_newZ	36	18	Z	Sha_scaffold709	33300	Chr_newZ	13	4.2	Z	n.a.	S0
Smp_164790	SC_0234	243798	1452	Z	Chr_newZ	SJC_S003830	17885	Chr_newZ	36	18	Z	Sha_scaffold709	33300	Chr_newZ	13	4.2	Z	n.a.	S0
Smp_164800	SC_0234	263565	2087	Z	Chr_newZ	SJC_S001488	23096	Chr_newZ	35	18	Z	Sha_scaffold709	33300	Chr_newZ	13	4.2	Z	n.a.	S0
Smp_165770	Chr_ZW	25603835	9150	Z	Chr_Z	SJC_S001431	26726	Chr_newZ	36	19	Z	Sha_scaffold666	209300	Chr_Z	11	3.7	Z	n.a.	S0
Smp_166490	SC_0111	669508	3729	Z	Chr_newZ	SJC_S001631	34554	Chr_newZ	35	18	Z	Sha_scaffold1545	88689	Chr_newZ	14	4.4	Z	n.a.	S0
Smp_166500	SC_0111	646047	7773	Z	Chr_newZ	SJC_S001631	34554	Chr_newZ	35	18	Z	Sha_scaffold1545	88689	Chr_newZ	14	4.4	Z	n.a.	S0
Smp_166520	SC_0111	693843	26267	Z	Chr_newZ	SJC_S004720	20944	Chr_newZ	28	13	Z	Sha_scaffold1545	88689	Chr_newZ	14	4.4	Z	n.a.	S0
Smp_166530	SC_0111	737985	5032	Z	Chr_newZ	SJC_S001382	31629	Chr_newZ	30	14	Z	Sha_scaffold1693	290204	Chr_newZ	14	4.4	Z	n.a.	S0
Smp_166540	SC_0111	745114	13238	Z	Chr_newZ	SJC_S001382	31629	Chr_newZ	30	14	Z	Sha_scaffold1693	290204	Chr_newZ	14	4.4	Z	n.a.	S0
Smp_166550	SC_0111	770045	6185	Z	Chr_newZ	SJC_S003769	13273	Chr_newZ	36	19	Z	Sha_scaffold1693	290204	Chr_newZ	14	4.4	Z	n.a.	S0
Smp_166560	SC_0111	835205	6886	Z	Chr_newZ	SJC_S000897	43451	Chr_newZ	31	14	Z	Sha_scaffold1693	290204	Chr_newZ	14	4.4	Z	n.a.	S0
Smp_166570	SC_0111	891063	5778	Z	Chr_newZ	SJC_S004804	5916	Chr_newZ	33	11	Z	Sha_scaffold1693	290204	Chr_newZ	14	4.4	Z	n.a.	S0
Smp_166610	SC_0111	1091254	905	Z	Chr_newZ	SJC_S001985	16182	Chr_newZ	35	15	Z	Sha_scaffold951	319925	Chr_Z	14	4.3	Z	n.a.	S0
Smp_166620	SC_0111	1111475	27527	Z	Chr_newZ	SJC_S014406	11385	Chr_newZ	29	14	Z	Sha_scaffold951	319925	Chr_Z	14	4.3	Z	n.a.	S0
Smp_168090	Chr_1.unplaced.SC_0034	2245336	13490	Z	Chr_newZ	SJC_S003782	21560	Chr_newZ	31	15	Z	Sha_scaffold5214	19421	Chr_newZ	11	3.4	Z	n.a.	S0
Smp_168130	Chr_1.unplaced.SC_0034	2158176	21735	Z	Chr_newZ	SJC_S007946	14315	Chr_newZ	31	15	Z	Sha_scaffold1840	47549	Chr_newZ	12	4	Z	n.a.	S0
Smp_172270	Chr_1.unplaced.SC_0034	1683454	35715	Z	Chr_newZ	SJC_S001431	26726	Chr_newZ	36	19	Z	Sha_scaffold513	63788	Chr_newZ	13	4	Z	n.a.	S0
Smp_172660	SC_0136	454370	25242	Z	Chr_newZ	SJC_S000779	52105	Chr_newZ	36	19	Z	Sha_scaffold1204	48652	Chr_newZ	13	4.3	Z	n.a.	S0
Smp_173510	SC_0136	287523	296	Z	Chr_newZ	SJC_S000781	103614	Chr_newZ	36	17	Z	Sha_scaffold2596	37909	Chr_newZ	14	4.6	Z	n.a.	S0
Smp_174360	Chr_ZW	16917971	2308	Z	Chr_Z	SJC_S007954	19097	Chr_newZ	29	15	Z	Sha_scaffold2059	271576	Chr_Z	14	4.5	Z	n.a.	S0
Smp_174370	SC_0111	566036	18432	Z	Chr_newZ	SJC_S000858	87466	Chr_newZ	33	16	Z	Sha_scaffold1143	220366	Chr_newZ	14	4.2	Z	n.a.	S0
Smp_174380	SC_0111	552233	13542	Z	Chr_newZ	SJC_S000858	87466	Chr_newZ	33	16	Z	Sha_scaffold1143	220366	Chr_newZ	14	4.2	Z	n.a.	S0
Smp_177280	SC_0187	187297	28071	Z	Chr_newZ	SJC_S003585	25508	Chr_newZ	35	17	Z	Sha_scaffold963	142638	Chr_newZ	14	4.3	Z	n.a.	S0
Smp_178770	Chr_ZW	26045697	16641	Z	Chr_Z	SJC_S002223	38367	Chr_UP	35	17	Z	Sha_scaffold3024	167301	Chr_Z	14	4.3	Z	n.a.	S0
Smp_179200	SC_0129	774125	503	Z	Chr_newZ	SJC_S027142	3988	Chr_newZ	34	13	Z	Sha_scaffold2034	98642	Chr_newZ	13	4.6	Z	n.a.	S0
Smp_179890	SC_0129	443930	4107	Z	Chr_newZ	SJC_S001027	157483	Chr_newZ	63	35	Z	Sha_scaffold1210	51976	Chr_newZ	12	3.7	Z	n.a.	S0
Smp_180190	SC_0129	267230	41782	Z	Chr_newZ	SJC_S002394	21226	Chr_newZ	36	18	Z	Sha_scaffold2031	26262	Chr_newZ	12	3.8	Z	n.a.	S0
Smp_188160	SC_0129	458268	269	Z	Chr_newZ	SJC_S008343	13402	Chr_UP	35	17	Z	Sha_scaffold1210	51976	Chr_newZ	12	3.7	Z	n.a.	S0
Smp_189960	Chr_1.unplaced.SC_0034	1797721	806	Z	Chr_newZ	SJC_S002354	26656	Chr_UP	40	20	Z	Sha_scaffold3420	32484	Chr_UP	8.9	2.9	Z	n.a.	S0
Smp_194270	SC_0278	93750	14557	Z	Chr_newZ	SJC_S001278	46594	Chr_Z	39	19	Z	Sha_scaffold771	89710	Chr_Z	14	4.6	Z	n.a.	S0
Smp_194280	SC_0278	33688	3547	Z	Chr_newZ	SJC_S001712	51785	Chr_Z	35	17	Z	Sha_scaffold3266	82762	Chr_newZ	13	4.1	Z	n.a.	S0
Smp_210650	SC_0129	528646	25018	Z	Chr_newZ	SJC_S002087	25989	Chr_newZ	49	24	Z	Sha_scaffold3041	31365	Chr_newZ	14	4.9	Z	n.a.	S0
Smp_212200	SC_0129	114768	23978	Z	Chr_newZ	SJC_S003292	30040	Chr_newZ	59	27	Z	Sha_scaffold1011	202521	Chr_newZ	13	4.2	Z	n.a.	S0
Smp_212530	SC_0129	860801	21894	Z	Chr_newZ	SJC_S007857	17201	Chr_newZ	30	16	Z	Sha_scaffold2983	42172	Chr_newZ	9	3	Z	n.a.	S0
Smp_132980	SC_0136	137408	27652	Z	Chr_newZ	SJC_S000781	103614	Chr_newZ	36	17	Z	Sha_scaffold3095	n.a.	Chr_newZ	n.a.	n.a.	n.a.	n.a.	S0
Smp_009690	SC_0187	76180	1382	Z	Chr_newZ	SJC_S008728	18453	Chr_newZ	34	16	Z	Sha_scaffold4159	29643	Chr_newZ	22	6.9	Autosome	n.a.	S0
Smp_091840	Chr_1.unplaced.SC_0034	1883584	13258	Z	Chr_newZ	SJC_S008506	12509	Chr_newZ	30	15	Z	Sha_scaffold2897	64693	Chr_newZ	27	8.4	Autosome	n.a.	S0
Smp_091850	Chr_1.unplaced.SC_0034	1910886	8052	Z	Chr_newZ	SJC_S002997	7071	Chr_newZ	34	16	Z	Sha_scaffold2897	64693	Chr_newZ	27	8.4	Autosome	n.a.	S0
Smp_172280	Chr_1.unplaced.SC_0034	2056393	19389	Z	Chr_newZ	SJC_S002926	8551	Chr_newZ	38	18	Z	Sha_scaffold2225	108701	Chr_newZ	19	6	Autosome	n.a.	S0
Smp_172300	Chr_1.unplaced.SC_0034	2088515	423	Z	Chr_newZ	SJC_S003803	12259	Chr_newZ	33	16	Z	Sha_scaffold4158	11037	Chr_newZ	26	7.5	Autosome	n.a.	S0
Smp_188150	Chr_1.unplaced.SC_0034	1966543	194	Z	Chr_newZ	SJC_S002211	17278	Chr_UP	28	13	Z	Sha_scaffold2225	108701	Chr_newZ	19	6	Autosome	n.a.	S0
Smp_066760	Chr_ZW	29718055	13068	Z	Chr_Z	SJC_S003728	25683	Chr_UP	34	16	Z	Sha_scaffold1006	744907	Chr_Z	16	5.2	Ambiguous	n.a.	S0
Smp_084270	SC_0677	2067	1109	Not analysed (Scaffold < 40kb)	Chr_UP	SJC_S001227	22714	Chr_UP	31	13	Z	Sha_scaffold164	326698	Chr_newZ	14	4.4	Z	n.a.	n.a.
Smp_120380	SC_0388	9968	21453	Not analysed (Scaffold < 40kb)	Chr_UP	SJC_S002835	6845	Chr_UP	70	34	Z	Sha_scaffold717	216658	Chr_Z	13	4.1	Z	n.a.	n.a.
Smp_132870	SC_0416	9057	6620	Not analysed (Scaffold < 40kb)	Chr_UP	SJC_S003837	20653	Chr_UP	41	22	Z	Sha_C10177974	3481	Chr_UP	13	4.9	Z	n.a.	n.a.
Smp_141820	SC_0638	38	3443	Not analysed (Scaffold < 40kb)	Chr_UP	SJC_S003618	42956	Chr_Z	38	19	Z	Sha_scaffold422	1179553	Chr_Z	14	4.4	Z	n.a.	n.a.
Smp_145590	SC_1608	2380	1234	Not analysed (Scaffold < 40kb)	Chr_UP	SJC_S001983	23894	Chr_Z	33	15	Z	Sha_scaffold3428	27665	Chr_Z	14	4.3	Z	n.a.	n.a.
Smp_166480	SC_0887	1662	3869	Not analysed (Scaffold < 40kb)	Chr_UP	SJC_S001382	31629	Chr_newZ	30	14	Z	Sha_scaffold1693	290204	Chr_newZ	14	4.4	Z	n.a.	n.a.
Smp_186940	SC_0729	7921	473	Not analysed (Scaffold < 40kb)	Chr_UP	SJC_S007474	5951	Chr_UP	39	19	Z	Sha_scaffold369	224453	Chr_Z	12	3.9	Z	n.a.	n.a.
Smp_193810	SC_0388	1519	6912	Not analysed (Scaffold < 40kb)	Chr_UP	SJC_S015365	3052	Chr_UP	36	18	Z	Sha_scaffold717	216658	Chr_Z	13	4.1	Z	n.a.	n.a.
Smp_199730	SC_0434	7463	9189	Not analysed (Scaffold < 40kb)	Chr_UP	SJC_S003728	25683	Chr_UP	34	16	Z	Sha_scaffold1268	520774	Chr_Z	13	4.3	Z	n.a.	n.a.
Smp_199780	SC_0459	15891	572	Not analysed (Scaffold < 40kb)	Chr_UP	SJC_S003782	21560	Chr_newZ	31	15	Z	Sha_scaffold5214	19421	Chr_newZ	11	3.4	Z	n.a.	n.a.
Smp_033370	SC_0434	1842	1036	Not analysed (Scaffold < 40kb)	Chr_UP	SJC_S003728	25683	Chr_UP	34	16	Z	n.a.	n.a.	n.a.	n.a.	n.a.	n.a.	n.a.	n.a.
Smp_128310	SC_0636	939	12731	Not analysed (Scaffold < 40kb)	Chr_UP	SJC_S001531	18343	Chr_UP	33	17	Z	n.a.	n.a.	n.a.	n.a.	n.a.	n.a.	n.a.	n.a.
Smp_194120	SC_0542	504	3846	Not analysed (Scaffold < 40kb)	Chr_UP	SJC_S001321	99131	Chr_UP	46	23	Z	n.a.	n.a.	n.a.	n.a.	n.a.	n.a.	n.a.	n.a.
Smp_199720	SC_0434	20971	695	Not analysed (Scaffold < 40kb)	Chr_UP	SJC_S008371	2103	Chr_UP	38	17	Z	n.a.	n.a.	n.a.	n.a.	n.a.	n.a.	n.a.	n.a.
Smp_205470	SC_0387	25820	494	Not analysed (Scaffold < 40kb)	Chr_UP	SJC_S014921	3659	Chr_UP	31	16	Z	Sha_scaffold1	502984	Chr_7	24	7.5	Autosome	n.a.	n.a.
Smp_011660	Chr_ZW	23288651	47068	Excluded	Chr_UP	SJC_S002288	44394	Chr_UP	34	17	Z	Sha_scaffold740	649873	Chr_Z	14	4.4	Z	n.a.	n.a.
Smp_047180	Chr_ZW	28606676	2549	Excluded	Chr_UP	SJC_S025449	2102	Chr_UP	27	12	Z	Sha_scaffold3572	29999	Chr_UP	13	4.3	Z	n.a.	n.a.
Smp_080040	Chr_ZW	24861582	10869	Excluded	Chr_UP	SJC_S000440	78376	Chr_Z	36	18	Z	Sha_scaffold824	605303	Chr_Z	14	4.4	Z	n.a.	n.a.
Smp_082250	SC_0111	1059446	7625	Excluded	Chr_UP	SJC_S024512	4872	Chr_UP	31	17	Z	Sha_scaffold951	319925	Chr_Z	14	4.3	Z	n.a.	n.a.
Smp_091770	Chr_1.unplaced.SC_0034	1635865	45345	Excluded	Chr_UP	SJC_S013691	4739	Chr_UP	33	16	Z	Sha_scaffold513	63788	Chr_newZ	13	4	Z	n.a.	n.a.
Smp_091810	Chr_1.unplaced.SC_0034	1796996	12189	Excluded	Chr_UP	SJC_S002354	26656	Chr_UP	40	20	Z	Sha_scaffold3420	32484	Chr_UP	8.9	2.9	Z	n.a.	n.a.
Smp_102840	Chr_ZW	23603245	7459	Excluded	Chr_UP	SJC_S000746	67591	Chr_UP	34	17	Z	Sha_scaffold1792	158631	Chr_Z	14	4.4	Z	n.a.	n.a.
Smp_125540	Chr_ZW	12846417	993	Excluded	Chr_UP	SJC_S004203	19697	Chr_Z	31	16	Z	Sha_scaffold2113	3241	Chr_UP	9.8	3.9	Z	n.a.	n.a.
Smp_128440	Chr_ZW	23733434	30324	Excluded	Chr_UP	SJC_S000698	111844	Chr_UP	53	29	Z	Sha_scaffold155	130586	Chr_Z	13	4	Z	n.a.	n.a.
Smp_128630	Chr_ZW	18868793	5606	Excluded	Chr_UP	SJC_S002429	11347	Chr_UP	35	19	Z	Sha_scaffold6	200389	Chr_Z	13	4.1	Z	n.a.	n.a.
Smp_139930	Chr_ZW	15147480	16837	Excluded	Chr_UP	SJC_S002205	10114	Chr_UP	35	17	Z	Sha_scaffold2073	109154	Chr_UP	12	3.8	Z	n.a.	n.a.
Smp_139940	Chr_ZW	15173779	10633	Excluded	Chr_UP	SJC_S003006	30058	Chr_UP	34	16	Z	Sha_scaffold2073	109154	Chr_UP	12	3.8	Z	n.a.	n.a.
Smp_143080	Chr_ZW	30810540	28081	Excluded	Chr_UP	SJC_S002223	38367	Chr_UP	35	17	Z	Sha_scaffold3024	167301	Chr_Z	14	4.3	Z	n.a.	n.a.
Smp_146210	Chr_ZW	13080349	32997	Excluded	Chr_UP	SJC_S002532	74668	Chr_Z	32	17	Z	Sha_scaffold4907	26748	Chr_UP	11	3.5	Z	n.a.	n.a.
Smp_147420	Chr_ZW	28799445	51680	Excluded	Chr_UP	SJC_S003687	27732	Chr_UP	32	15	Z	Sha_scaffold1238	66559	Chr_UP	14	4.7	Z	n.a.	n.a.
Smp_147460	Chr_ZW	28471723	33815	Excluded	Chr_UP	SJC_S000444	35469	Chr_UP	34	16	Z	Sha_scaffold1730	44622	Chr_UP	13	4.2	Z	n.a.	n.a.
Smp_147520	Chr_ZW	29409839	50963	Excluded	Chr_UP	SJC_S001513	36161	Chr_UP	40	20	Z	Sha_scaffold2301	64044	Chr_UP	12	4	Z	n.a.	n.a.
Smp_154010	Chr_ZW	15096676	4664	Excluded	Chr_UP	SJC_S023579	6116	Chr_UP	32	17	Z	Sha_scaffold4639	12349	Chr_UP	8.1	2.8	Z	n.a.	n.a.
Smp_155380	Chr_ZW	30387043	4855	Excluded	Chr_UP	SJC_S008470	22636	Chr_UP	34	16	Z	Sha_scaffold1707	84947	Chr_UP	13	4.2	Z	n.a.	n.a.
Smp_155390	Chr_ZW	30346500	21217	Excluded	Chr_UP	SJC_S004535	10373	Chr_UP	32	16	Z	Sha_scaffold1707	84947	Chr_UP	13	4.2	Z	n.a.	n.a.
Smp_155480	Chr_ZW	29999110	17631	Excluded	Chr_UP	SJC_S004482	12564	Chr_UP	37	16	Z	Sha_scaffold1504	506468	Chr_Z	14	4.4	Z	n.a.	n.a.
Smp_158010	Chr_3	1512810	200	Excluded	Chr_UP	SJC_S000213	217068	Chr_Z	38	17	Z	Sha_scaffold791	67403	Chr_UP	14	5.2	Z	n.a.	n.a.
Smp_158040	SC_0136	665504	35349	Excluded	Chr_UP	SJC_S000438	93289	Chr_newZ	36	18	Z	Sha_scaffold538	90264	Chr_newZ	12	4	Z	n.a.	n.a.
Smp_159120	Chr_ZW	25500694	39103	Excluded	Chr_UP	SJC_S001162	42157	Chr_UP	57	28	Z	Sha_scaffold666	209300	Chr_Z	11	3.7	Z	n.a.	n.a.
Smp_164410	Chr_ZW	26279962	22158	Excluded	Chr_UP	SJC_S028066	14824	Chr_UP	37	18	Z	Sha_scaffold960	38894	Chr_UP	14	4.8	Z	n.a.	n.a.
Smp_165260	Chr_ZW	24894224	35932	Excluded	Chr_UP	SJC_S004302	23012	Chr_UP	35	17	Z	Sha_scaffold824	605303	Chr_Z	14	4.4	Z	n.a.	n.a.
Smp_165850	Chr_ZW	25933591	47972	Excluded	Chr_UP	SJC_S001588	121741	Chr_Z	34	17	Z	Sha_scaffold1870	89605	Chr_UP	12	3.6	Z	n.a.	n.a.
Smp_166580	SC_0111	930766	10823	Excluded	Chr_UP	SJC_S003980	53820	Chr_UP	33	16	Z	Sha_scaffold1693	290204	Chr_newZ	14	4.4	Z	n.a.	n.a.
Smp_166590	SC_0111	963054	58993	Excluded	Chr_UP	SJC_S001423	46855	Chr_UP	31	16	Z	Sha_scaffold951	319925	Chr_Z	14	4.3	Z	n.a.	n.a.
Smp_173580	Chr_ZW	18020014	11796	Excluded	Chr_UP	SJC_S001990	41158	Chr_UP	34	17	Z	Sha_scaffold1406	127494	Chr_Z	15	4.7	Z	n.a.	n.a.
Smp_174390	SC_0111	409119	4607	Excluded	Chr_UP	SJC_S002673	16743	Chr_UP	41	17	Z	Sha_scaffold1143	220366	Chr_newZ	14	4.2	Z	n.a.	n.a.
Smp_179460	Chr_ZW	23613602	281	Excluded	Chr_UP	SJC_S000746	67591	Chr_UP	34	17	Z	Sha_scaffold1792	158631	Chr_Z	14	4.4	Z	n.a.	n.a.
Smp_179880	SC_0129	469937	19520	Excluded	Chr_UP	SJC_S008343	13402	Chr_UP	35	17	Z	Sha_scaffold1210	51976	Chr_newZ	12	3.7	Z	n.a.	n.a.
Smp_180010	Chr_ZW	27003998	8689	Excluded	Chr_UP	SJC_S025992	3930	Chr_UP	28	15	Z	Sha_scaffold1145	207737	Chr_Z	14	4.5	Z	n.a.	n.a.
Smp_182180	Chr_ZW	30840202	161	Excluded	Chr_UP	SJC_S002223	38367	Chr_UP	35	17	Z	Sha_scaffold3024	167301	Chr_Z	14	4.3	Z	n.a.	n.a.
Smp_188670	Chr_1.unplaced.SC_0034	1834138	621	Excluded	Chr_UP	SJC_S002211	17278	Chr_UP	28	13	Z	Sha_scaffold2149	45666	Chr_newZ	15	4.8	Z	n.a.	n.a.
Smp_197050	Chr_1	16927	388	Excluded	Chr_UP	SJC_S008734	26019	Chr_UP	37	18	Z	Sha_scaffold1738	171371	Chr_UP	14	4.4	Z	n.a.	n.a.
Smp_210970	Chr_ZW	28314035	8189	Excluded	Chr_UP	SJC_S003540	30721	Chr_Z	32	16	Z	Sha_scaffold2960	58514	Chr_UP	13	4.3	Z	n.a.	n.a.
Smp_186980	Chr_1	11159	1591	Excluded	Chr_UP	SJC_S007798	10939	Chr_UP	36	18	Z	Sha_C10190374	n.a.	Chr_UP	0	0	n.a.	n.a.	n.a.
Smp_157800	Chr_ZW	34355089	10726	Excluded	Chr_UP	SJC_S000158	179731	Chr_PSA	34	18	Z	Sha_scaffold1169	455880	Chr_PSA	23	7.2	Autosome	n.a.	n.a.
Smp_132010	Chr_ZW	32741637	1864	Excluded	Chr_UP	SJC_S000995	40033	Chr_PSA	35	17	Z	Sha_scaffold1006	744907	Chr_Z	16	5.2	Ambiguous	n.a.	n.a.
Smp_047190	Chr_ZW	28551975	41600	Autosome	Chr_PSA	SJC_S000887	15942	Chr_PSA	36	17	Z	Sha_scaffold2660	79188	Chr_PSA	13	4.4	Z	S1_jap	S1_jap
Smp_047200	Chr_ZW	28525276	1476	Autosome	Chr_PSA	SJC_S001231	17092	Chr_PSA	31	16	Z	Sha_scaffold2660	79188	Chr_PSA	13	4.4	Z	S1_jap	S1_jap
Smp_189130	Chr_ZW	34210056	221	Autosome	Chr_PSA	SJC_S028012	5228	Chr_PSA	40	17	Z	n.a.	n.a.	n.a.	n.a.	n.a.	n.a.	S1_jap	S1_jap
Smp_017750	Chr_ZW	31924567	13039	Autosome	Chr_PSA	SJC_S000269	248397	Chr_PSA	35	17	Z	Sha_scaffold293	568615	Chr_PSA	24	7.3	Autosome	S1_jap	S1_jap
Smp_017810	Chr_ZW	32143644	38367	Autosome	Chr_PSA	SJC_S000773	89136	Chr_PSA	34	18	Z	Sha_scaffold293	568615	Chr_PSA	24	7.3	Autosome	S1_jap	S1_jap
Smp_017860	Chr_ZW	32427462	6060	Autosome	Chr_PSA	SJC_S001086	18504	Chr_PSA	38	18	Z	Sha_scaffold863	174594	Chr_PSA	20	6	Autosome	S1_jap	S1_jap
Smp_017870	Chr_ZW	32448958	7810	Autosome	Chr_PSA	SJC_S001086	18504	Chr_PSA	38	18	Z	Sha_scaffold863	174594	Chr_PSA	20	6	Autosome	S1_jap	S1_jap
Smp_017900	Chr_ZW	32550658	59929	Autosome	Chr_PSA	SJC_S000818	82918	Chr_PSA	100	33	Z	Sha_scaffold2028	164072	Chr_PSA	25	7.7	Autosome	S1_jap	S1_jap
Smp_018030	Chr_ZW	33008539	6254	Autosome	Chr_PSA	SJC_S008069	6991	Chr_PSA	35	17	Z	Sha_scaffold7	183041	Chr_PSA	22	6.9	Autosome	S1_jap	S1_jap
Smp_018120	Chr_ZW	33315753	58451	Autosome	Chr_PSA	SJC_S007678	11185	Chr_PSA	31	16	Z	Sha_scaffold1614	229064	Chr_PSA	25	7.5	Autosome	S1_jap	S1_jap
Smp_018160	Chr_ZW	33505914	62899	Autosome	Chr_PSA	SJC_S001838	25637	Chr_PSA	36	19	Z	Sha_scaffold1193	137118	Chr_PSA	27	8.2	Autosome	S1_jap	S1_jap
Smp_018170	Chr_ZW	33574748	1541	Autosome	Chr_PSA	SJC_S001196	36958	Chr_PSA	36	17	Z	Sha_C10090275	1381	Chr_PSA	30	8.1	Autosome	S1_jap	S1_jap
Smp_065980	Chr_ZW	34476422	7449	Autosome	Chr_PSA	SJC_S025738	3627	Chr_PSA	36	18	Z	Sha_scaffold1169	455880	Chr_PSA	23	7.2	Autosome	S1_jap	S1_jap
Smp_066010	Chr_ZW	34323463	12865	Autosome	Chr_PSA	SJC_S000158	179731	Chr_PSA	34	18	Z	Sha_scaffold1169	455880	Chr_PSA	23	7.2	Autosome	S1_jap	S1_jap
Smp_066050	Chr_ZW	34113227	23078	Autosome	Chr_PSA	SJC_S000158	179731	Chr_PSA	34	18	Z	Sha_scaffold1169	455880	Chr_PSA	23	7.2	Autosome	S1_jap	S1_jap
Smp_074710	Chr_ZW	31863210	43361	Autosome	Chr_PSA	SJC_S000269	248397	Chr_PSA	35	17	Z	Sha_scaffold293	568615	Chr_PSA	24	7.3	Autosome	S1_jap	S1_jap
Smp_086130	Chr_ZW	31570462	31605	Autosome	Chr_PSA	SJC_S023791	7456	Chr_PSA	32	17	Z	Sha_scaffold225	150397	Chr_PSA	22	6.9	Autosome	S1_jap	S1_jap
Smp_131940	Chr_ZW	31959787	35518	Autosome	Chr_PSA	SJC_S002008	32652	Chr_PSA	40	19	Z	Sha_scaffold293	568615	Chr_PSA	24	7.3	Autosome	S1_jap	S1_jap
Smp_131950	Chr_ZW	32053729	17614	Autosome	Chr_PSA	SJC_S002219	13951	Chr_PSA	32	15	Z	Sha_scaffold293	568615	Chr_PSA	24	7.3	Autosome	S1_jap	S1_jap
Smp_131960	Chr_ZW	32072460	33114	Autosome	Chr_PSA	SJC_S000773	89136	Chr_PSA	34	18	Z	Sha_scaffold293	568615	Chr_PSA	24	7.3	Autosome	S1_jap	S1_jap
Smp_131970	Chr_ZW	32126671	14225	Autosome	Chr_PSA	SJC_S000773	89136	Chr_PSA	34	18	Z	Sha_scaffold293	568615	Chr_PSA	24	7.3	Autosome	S1_jap	S1_jap
Smp_131980	Chr_ZW	32304147	257	Autosome	Chr_PSA	SJC_S000734	95029	Chr_PSA	36	17	Z	Sha_scaffold293	568615	Chr_PSA	24	7.3	Autosome	S1_jap	S1_jap
Smp_131990	Chr_ZW	32386592	29607	Autosome	Chr_PSA	SJC_S001114	28844	Chr_PSA	33	17	Z	Sha_scaffold863	174594	Chr_PSA	20	6	Autosome	S1_jap	S1_jap
Smp_132000	Chr_ZW	32618406	44995	Autosome	Chr_PSA	SJC_S003683	14135	Chr_PSA	110	34	Z	Sha_scaffold2028	164072	Chr_PSA	25	7.7	Autosome	S1_jap	S1_jap
Smp_132070	Chr_ZW	33024641	91807	Autosome	Chr_PSA	SJC_S002998	14807	Chr_PSA	33	16	Z	Sha_scaffold7	183041	Chr_PSA	22	6.9	Autosome	S1_jap	S1_jap
Smp_132080	Chr_ZW	33181151	22325	Autosome	Chr_PSA	SJC_S000754	209660	Chr_PSA	33	16	Z	Sha_scaffold7	183041	Chr_PSA	22	6.9	Autosome	S1_jap	S1_jap
Smp_132090	Chr_ZW	33204262	5121	Autosome	Chr_PSA	SJC_S000754	209660	Chr_PSA	33	16	Z	Sha_scaffold7	183041	Chr_PSA	22	6.9	Autosome	S1_jap	S1_jap
Smp_132120	Chr_ZW	33231313	13001	Autosome	Chr_PSA	SJC_S000754	209660	Chr_PSA	33	16	Z	Sha_scaffold1614	229064	Chr_PSA	25	7.5	Autosome	S1_jap	S1_jap
Smp_132130	Chr_ZW	33248131	56655	Autosome	Chr_PSA	SJC_S000754	209660	Chr_PSA	33	16	Z	Sha_scaffold1614	229064	Chr_PSA	25	7.5	Autosome	S1_jap	S1_jap
Smp_132150	Chr_ZW	33380950	33590	Autosome	Chr_PSA	SJC_S000754	209660	Chr_PSA	33	16	Z	Sha_scaffold1614	229064	Chr_PSA	25	7.5	Autosome	S1_jap	S1_jap
Smp_132160	Chr_ZW	33425239	2826	Autosome	Chr_PSA	SJC_S004211	10643	Chr_PSA	31	14	Z	Sha_scaffold1614	229064	Chr_PSA	25	7.5	Autosome	S1_jap	S1_jap
Smp_132170	Chr_ZW	33616418	42581	Autosome	Chr_PSA	SJC_S007088	8552	Chr_PSA	27	14	Z	Sha_scaffold1772	153426	Chr_PSA	25	8.2	Autosome	S1_jap	S1_jap
Smp_132180	Chr_ZW	33674364	11466	Autosome	Chr_PSA	SJC_S001144	31984	Chr_PSA	35	19	Z	Sha_scaffold1772	153426	Chr_PSA	25	8.2	Autosome	S1_jap	S1_jap
Smp_135970	Chr_ZW	35738034	4373	Autosome	Chr_PSA	SJC_S018055	3040	Chr_PSA	37	17	Z	Sha_scaffold1162	241121	Chr_PSA	23	7.3	Autosome	S1_jap	S1_jap
Smp_146870	Chr_ZW	37064612	17422	Autosome	Chr_PSA	SJC_S001907	35324	Chr_PSA	32	16	Z	Sha_scaffold2280	34327	Chr_PSA	19	6.1	Autosome	S1_jap	S1_jap
Smp_157710	Chr_ZW	34731383	17442	Autosome	Chr_PSA	SJC_S008169	11430	Chr_PSA	39	19	Z	Sha_scaffold773	415109	Chr_PSA	25	7.7	Autosome	S1_jap	S1_jap
Smp_157760	Chr_ZW	34552089	22529	Autosome	Chr_PSA	SJC_S001191	45019	Chr_PSA	35	17	Z	Sha_scaffold1872	85896	Chr_PSA	19	6.1	Autosome	S1_jap	S1_jap
Smp_157770	Chr_ZW	34520072	24064	Autosome	Chr_PSA	SJC_S001191	45019	Chr_PSA	35	17	Z	Sha_scaffold1872	85896	Chr_PSA	19	6.1	Autosome	S1_jap	S1_jap
Smp_157790	Chr_ZW	34409321	22994	Autosome	Chr_PSA	SJC_S001548	19397	Chr_PSA	34	15	Z	Sha_scaffold1169	455880	Chr_PSA	23	7.2	Autosome	S1_jap	S1_jap
Smp_157810	Chr_ZW	34308092	13920	Autosome	Chr_PSA	SJC_S000158	179731	Chr_PSA	34	18	Z	Sha_scaffold1169	455880	Chr_PSA	23	7.2	Autosome	S1_jap	S1_jap
Smp_157830	Chr_ZW	34151905	44956	Autosome	Chr_PSA	SJC_S000158	179731	Chr_PSA	34	18	Z	Sha_scaffold1169	455880	Chr_PSA	23	7.2	Autosome	S1_jap	S1_jap
Smp_157840	Chr_ZW	34071275	32540	Autosome	Chr_PSA	SJC_S003536	13405	Chr_PSA	33	15	Z	Sha_scaffold1169	455880	Chr_PSA	23	7.2	Autosome	S1_jap	S1_jap
Smp_157860	Chr_ZW	33901299	31943	Autosome	Chr_PSA	SJC_S020523	2112	Chr_PSA	37	19	Z	Sha_scaffold1472	128397	Chr_PSA	22	6.8	Autosome	S1_jap	S1_jap
Smp_157870	Chr_ZW	33816050	31759	Autosome	Chr_PSA	SJC_S000898	45768	Chr_PSA	35	15	Z	Sha_scaffold839	409397	Chr_PSA	20	6.3	Autosome	S1_jap	S1_jap
Smp_157880	Chr_ZW	33772893	10908	Autosome	Chr_PSA	SJC_S000898	45768	Chr_PSA	35	15	Z	Sha_scaffold839	409397	Chr_PSA	20	6.3	Autosome	S1_jap	S1_jap
Smp_162480	Chr_ZW	31849889	6047	Autosome	Chr_PSA	SJC_S007615	27273	Chr_PSA	32	13	Z	Sha_scaffold293	568615	Chr_PSA	24	7.3	Autosome	S1_jap	S1_jap
Smp_162490	Chr_ZW	31827314	14963	Autosome	Chr_PSA	SJC_S007615	27273	Chr_PSA	32	13	Z	Sha_scaffold293	568615	Chr_PSA	24	7.3	Autosome	S1_jap	S1_jap
Smp_162500	Chr_ZW	31784965	12464	Autosome	Chr_PSA	SJC_S000269	248397	Chr_PSA	35	17	Z	Sha_scaffold293	568615	Chr_PSA	24	7.3	Autosome	S1_jap	S1_jap
Smp_162510	Chr_ZW	31750611	23578	Autosome	Chr_PSA	SJC_S006977	2878	Chr_PSA	31	11	Z	Sha_scaffold293	568615	Chr_PSA	24	7.3	Autosome	S1_jap	S1_jap
Smp_162580	Chr_ZW	31535559	68	Autosome	Chr_PSA	SJC_S013725	3481	Chr_PSA	29	15	Z	Sha_scaffold839	409397	Chr_PSA	20	6.3	Autosome	S1_jap	S1_jap
Smp_168970	Chr_ZW	31537477	23493	Autosome	Chr_PSA	SJC_S002733	7639	Chr_PSA	29	15	Z	Sha_scaffold839	409397	Chr_PSA	20	6.3	Autosome	S1_jap	S1_jap
Smp_168980	Chr_ZW	31607628	49756	Autosome	Chr_PSA	SJC_S001148	16014	Chr_PSA	32	14	Z	Sha_scaffold225	150397	Chr_PSA	22	6.9	Autosome	S1_jap	S1_jap
Smp_168990	Chr_ZW	31669847	16028	Autosome	Chr_PSA	SJC_S000269	248397	Chr_PSA	35	17	Z	Sha_scaffold225	150397	Chr_PSA	22	6.9	Autosome	S1_jap	S1_jap
Smp_169010	Chr_ZW	31706411	13441	Autosome	Chr_PSA	SJC_S000269	248397	Chr_PSA	35	17	Z	Sha_scaffold225	150397	Chr_PSA	22	6.9	Autosome	S1_jap	S1_jap
Smp_182140	Chr_ZW	33209977	257	Autosome	Chr_PSA	SJC_S000754	209660	Chr_PSA	33	16	Z	Sha_scaffold7	183041	Chr_PSA	22	6.9	Autosome	S1_jap	S1_jap
Smp_187090	Chr_ZW	32491848	2402	Autosome	Chr_PSA	SJC_S000743	37863	Chr_PSA	36	16	Z	Sha_scaffold863	174594	Chr_PSA	20	6	Autosome	S1_jap	S1_jap
Smp_198620	Chr_ZW	31471454	428	Autosome	Chr_PSA	SJC_S002147	30050	Chr_PSA	32	14	Z	Sha_scaffold839	409397	Chr_PSA	20	6.3	Autosome	S1_jap	S1_jap
Smp_204190	Chr_ZW	33737465	7806	Autosome	Chr_PSA	SJC_S003574	19147	Chr_PSA	36	17	Z	Sha_scaffold839	409397	Chr_PSA	20	6.3	Autosome	S1_jap	S1_jap
Smp_017990	Chr_ZW	32911026	483	Autosome	Chr_PSA	SJC_S013552	3196	Chr_PSA	30	16	Z	Sha_scaffold1006	744907	Chr_Z	16	5.2	Ambiguous	S1_jap	S1_jap
Smp_018010	Chr_ZW	32977857	13897	Autosome	Chr_PSA	SJC_S000442	68749	Chr_PSA	37	19	Z	Sha_scaffold1006	744907	Chr_Z	16	5.2	Ambiguous	S1_jap	S1_jap
Smp_025260	Chr_ZW	36072594	6968	Autosome	Chr_PSA	SJC_S009840	7183	Chr_PSA	29	15	Z	Sha_scaffold1613	64837	Chr_PSA	17	5.4	Ambiguous	S1_jap	S1_jap
Smp_132020	Chr_ZW	32771192	8848	Autosome	Chr_PSA	SJC_S000995	40033	Chr_PSA	35	17	Z	Sha_scaffold1006	744907	Chr_Z	16	5.2	Ambiguous	S1_jap	S1_jap
Smp_132040	Chr_ZW	32800547	18859	Autosome	Chr_PSA	SJC_S002090	35648	Chr_PSA	35	17	Z	Sha_scaffold1006	744907	Chr_Z	16	5.2	Ambiguous	S1_jap	S1_jap
Smp_132050	Chr_ZW	32884309	17665	Autosome	Chr_PSA	SJC_S008551	21350	Chr_PSA	36	18	Z	Sha_scaffold1006	744907	Chr_Z	16	5.2	Ambiguous	S1_jap	S1_jap
Smp_132060	Chr_ZW	32926538	3977	Autosome	Chr_PSA	SJC_S008469	27325	Chr_PSA	34	15	Z	Sha_scaffold1006	744907	Chr_Z	16	5.2	Ambiguous	S1_jap	S1_jap
Smp_135910	Chr_ZW	36033605	19654	Autosome	Chr_PSA	SJC_S000893	15759	Chr_PSA	34	16	Z	Sha_scaffold1613	64837	Chr_PSA	17	5.4	Ambiguous	S1_jap	S1_jap
Smp_075470	SC_0138	794818	9374	Autosome	Chr_UP	SJC_S000782	39432	Chr_UP	34	16	Z	Sha_scaffold741	78686	Chr_UP	14	4.5	Z	n.a.	S1_jap
Smp_162880	SC_0138	813911	27396	Autosome	Chr_UP	SJC_S000782	39432	Chr_UP	34	16	Z	Sha_scaffold741	78686	Chr_UP	14	4.5	Z	n.a.	S1_jap
Smp_125830	Chr_1	24187468	524	Autosome	Chr_1	SJC_S002334	20118	Chr_1	28	15	Z	n.a.	n.a.	n.a.	n.a.	n.a.	n.a.	n.a.	S1_jap
Smp_173290	SC_0154	81573	1182	Autosome	Chr_UP	SJC_S001321	99131	Chr_UP	46	23	Z	n.a.	n.a.	n.a.	n.a.	n.a.	n.a.	n.a.	S1_jap
Smp_202920	Chr_6	1670877	332	Autosome	Chr_6	SJC_S005893	2688	Chr_6	22	9.2	Z	n.a.	n.a.	n.a.	n.a.	n.a.	n.a.	n.a.	S1_jap
Smp_212070	SC_0238	131937	3378	Autosome	Chr_UP	SJC_S000410	74164	Chr_UP	30	16	Z	n.a.	n.a.	n.a.	n.a.	n.a.	n.a.	n.a.	S1_jap
Smp_018240	SC_0186	44480	10955	Autosome	Chr_UP	SJC_S001834	22527	Chr_UP	33	17	Z	Sha_scaffold14	425436	Chr_UP	25	7.9	Autosome	n.a.	S1_jap
Smp_026630	SC_0013	390963	2990	Autosome	Chr_UP	SJC_S009203	11393	Chr_UP	25	12	Z	Sha_scaffold1267	378798	Chr_UP	26	8.1	Autosome	n.a.	S1_jap
Smp_026670	SC_0013	158984	47518	Autosome	Chr_UP	SJC_S000935	60234	Chr_UP	32	15	Z	Sha_scaffold1267	378798	Chr_UP	26	8.1	Autosome	n.a.	S1_jap
Smp_026700	SC_0013	70146	29720	Autosome	Chr_UP	SJC_S000739	73072	Chr_UP	37	18	Z	Sha_scaffold1725	90810	Chr_UP	23	7.5	Autosome	n.a.	S1_jap
Smp_058650	SC_0013	684279	6552	Autosome	Chr_UP	SJC_S001359	22722	Chr_UP	51	25	Z	Sha_scaffold923	152792	Chr_UP	24	7.6	Autosome	n.a.	S1_jap
Smp_058680	SC_0013	640494	6901	Autosome	Chr_UP	SJC_S010103	24340	Chr_UP	31	17	Z	Sha_scaffold923	152792	Chr_UP	24	7.6	Autosome	n.a.	S1_jap
Smp_058690	SC_0013	623632	2381	Autosome	Chr_UP	SJC_S007125	3756	Chr_UP	38	20	Z	Sha_C10033287	972	Chr_UP	46	16	Autosome	n.a.	S1_jap
Smp_058720	SC_0013	562455	1905	Autosome	Chr_UP	SJC_S024514	3535	Chr_UP	40	20	Z	Sha_scaffold473	19357	Chr_UP	21	6.6	Autosome	n.a.	S1_jap
Smp_072100	SC_0177	86373	680	Autosome	Chr_UP	SJC_S012343	1001	Chr_UP	11	4.1	Z	Sha_scaffold905	324318	Chr_UP	24	7.7	Autosome	n.a.	S1_jap
Smp_074280	Chr_6	615851	683	Autosome	Chr_6	SJC_S017781	2500	Chr_6	26	13	Z	Sha_scaffold104	647123	Chr_6	21	6.7	Autosome	n.a.	S1_jap
Smp_076230	SC_0138	767546	3747	Autosome	Chr_UP	SJC_S000782	39432	Chr_UP	34	16	Z	Sha_scaffold95	289222	Chr_UP	19	6.1	Autosome	n.a.	S1_jap
Smp_076300	SC_0138	641583	21799	Autosome	Chr_UP	SJC_S000878	44359	Chr_UP	35	17	Z	Sha_scaffold95	289222	Chr_UP	19	6.1	Autosome	n.a.	S1_jap
Smp_076320	SC_0138	568740	1253	Autosome	Chr_UP	SJC_S024977	1914	Chr_UP	29	14	Z	Sha_scaffold95	289222	Chr_UP	19	6.1	Autosome	n.a.	S1_jap
Smp_076370	SC_0138	503090	4003	Autosome	Chr_UP	SJC_S000636	157675	Chr_UP	34	17	Z	Sha_scaffold1465	14505	Chr_UP	22	7.5	Autosome	n.a.	S1_jap
Smp_076390	SC_0149	702329	2349	Autosome	Chr_UP	SJC_S000636	157675	Chr_UP	34	17	Z	Sha_scaffold1716	240364	Chr_UP	20	6.4	Autosome	n.a.	S1_jap
Smp_076400	SC_0149	658194	632	Autosome	Chr_UP	SJC_S000636	157675	Chr_UP	34	17	Z	Sha_scaffold1716	240364	Chr_UP	20	6.4	Autosome	n.a.	S1_jap
Smp_076450	SC_0149	519007	6745	Autosome	Chr_UP	SJC_S013792	3626	Chr_UP	38	19	Z	Sha_scaffold1716	240364	Chr_UP	20	6.4	Autosome	n.a.	S1_jap
Smp_076490	SC_0149	484885	953	Autosome	Chr_UP	SJC_S004461	10039	Chr_UP	36	16	Z	Sha_scaffold299	68892	Chr_UP	19	6.2	Autosome	n.a.	S1_jap
Smp_083430	SC_0037	775330	1963	Autosome	Chr_UP	SJC_S006862	1681	Chr_UP	16	7.7	Z	Sha_scaffold1429	262016	Chr_UP	25	7.6	Autosome	n.a.	S1_jap
Smp_085990	SC_0013	487207	49070	Autosome	Chr_UP	SJC_S000108	296063	Chr_UP	33	17	Z	Sha_scaffold539	84374	Chr_UP	32	10	Autosome	n.a.	S1_jap
Smp_093800	SC_0186	360226	12459	Autosome	Chr_UP	SJC_S002357	22702	Chr_UP	35	18	Z	Sha_scaffold14	425436	Chr_UP	25	7.9	Autosome	n.a.	S1_jap
Smp_098590	SC_0186	265367	473	Autosome	Chr_UP	SJC_S001975	20790	Chr_UP	33	18	Z	Sha_scaffold14	425436	Chr_UP	25	7.9	Autosome	n.a.	S1_jap
Smp_098610	SC_0186	241693	228	Autosome	Chr_UP	SJC_S000647	77365	Chr_UP	33	16	Z	Sha_scaffold14	425436	Chr_UP	25	7.9	Autosome	n.a.	S1_jap
Smp_098650	SC_0186	114863	3715	Autosome	Chr_UP	SJC_S000647	77365	Chr_UP	33	16	Z	Sha_scaffold14	425436	Chr_UP	25	7.9	Autosome	n.a.	S1_jap
Smp_106260	SC_0149	497363	560	Autosome	Chr_UP	SJC_S008430	7343	Chr_UP	29	13	Z	Sha_scaffold1716	240364	Chr_UP	20	6.4	Autosome	n.a.	S1_jap
Smp_116760	Chr_7	5029135	1010	Autosome	Chr_7	SJC_S026042	2999	Chr_7	10	4.7	Z	Sha_C9111378	103	Chr_7	230	70	Autosome	n.a.	S1_jap
Smp_123720	Chr_4	17040956	41478	Autosome	Chr_4	SJC_S004884	6361	Chr_4	22	11	Z	Sha_scaffold451	329572	Chr_4	19	6.3	Autosome	n.a.	S1_jap
Smp_126000	Chr_1	30583044	17709	Autosome	Chr_1	SJC_S000108	296063	Chr_UP	33	17	Z	Sha_scaffold2674	54537	Chr_1	26	7.7	Autosome	n.a.	S1_jap
Smp_134770	Chr_7	4363677	1177	Autosome	Chr_7	SJC_S028087	14880	Chr_7	22	1.2	Z	Sha_scaffold705	990905	Chr_UP	24	7.6	Autosome	n.a.	S1_jap
Smp_136550	SC_0013	341699	40651	Autosome	Chr_UP	SJC_S000108	296063	Chr_UP	33	17	Z	Sha_scaffold1267	378798	Chr_UP	26	8.1	Autosome	n.a.	S1_jap
Smp_136560	SC_0013	278815	50862	Autosome	Chr_UP	SJC_S007801	25745	Chr_UP	37	19	Z	Sha_scaffold1267	378798	Chr_UP	26	8.1	Autosome	n.a.	S1_jap
Smp_136570	SC_0013	260301	13908	Autosome	Chr_UP	SJC_S004034	6202	Chr_UP	29	16	Z	Sha_scaffold1267	378798	Chr_UP	26	8.1	Autosome	n.a.	S1_jap
Smp_136580	SC_0013	100681	27652	Autosome	Chr_UP	SJC_S000739	73072	Chr_UP	37	18	Z	Sha_scaffold1725	90810	Chr_UP	23	7.5	Autosome	n.a.	S1_jap
Smp_136590	SC_0013	65604	1912	Autosome	Chr_UP	SJC_S000739	73072	Chr_UP	37	18	Z	Sha_scaffold1725	90810	Chr_UP	23	7.5	Autosome	n.a.	S1_jap
Smp_153720	SC_0013	709112	48618	Autosome	Chr_UP	SJC_S000871	45320	Chr_UP	32	16	Z	Sha_scaffold923	152792	Chr_UP	24	7.6	Autosome	n.a.	S1_jap
Smp_153730	SC_0013	564379	1260	Autosome	Chr_UP	SJC_S024514	3535	Chr_UP	40	20	Z	Sha_scaffold473	19357	Chr_UP	21	6.6	Autosome	n.a.	S1_jap
Smp_155540	SC_0154	264107	16137	Autosome	Chr_UP	SJC_S000698	111844	Chr_UP	53	29	Z	Sha_scaffold215	263704	Chr_UP	20	6.7	Autosome	n.a.	S1_jap
Smp_157890	Chr_ZW	33720784	10739	Autosome	Chr_PSA	SJC_S001056	59240	Chr_UP	35	17	Z	Sha_scaffold839	409397	Chr_PSA	20	6.3	Autosome	n.a.	S1_jap
Smp_163250	SC_0138	721878	45603	Autosome	Chr_UP	SJC_S003921	14138	Chr_UP	34	16	Z	Sha_scaffold95	289222	Chr_UP	19	6.1	Autosome	n.a.	S1_jap
Smp_163260	SC_0138	711883	5001	Autosome	Chr_UP	SJC_S002954	6233	Chr_UP	36	17	Z	Sha_scaffold95	289222	Chr_UP	19	6.1	Autosome	n.a.	S1_jap
Smp_163270	SC_0138	668013	11487	Autosome	Chr_UP	SJC_S000878	44359	Chr_UP	35	17	Z	Sha_scaffold95	289222	Chr_UP	19	6.1	Autosome	n.a.	S1_jap
Smp_163280	SC_0138	577762	7549	Autosome	Chr_UP	SJC_S003562	11105	Chr_UP	30	14	Z	Sha_C9990307	780	Chr_UP	37	11	Autosome	n.a.	S1_jap
Smp_163290	SC_0138	525940	38487	Autosome	Chr_UP	SJC_S000636	157675	Chr_UP	34	17	Z	Sha_scaffold95	289222	Chr_UP	19	6.1	Autosome	n.a.	S1_jap
Smp_163300	SC_0138	510078	1272	Autosome	Chr_UP	SJC_S000636	157675	Chr_UP	34	17	Z	Sha_scaffold95	289222	Chr_UP	19	6.1	Autosome	n.a.	S1_jap
Smp_163310	SC_0149	598653	40992	Autosome	Chr_UP	SJC_S007766	23715	Chr_UP	27	13	Z	Sha_scaffold1716	240364	Chr_UP	20	6.4	Autosome	n.a.	S1_jap
Smp_163320	SC_0149	560551	22163	Autosome	Chr_UP	SJC_S003861	21493	Chr_UP	38	18	Z	Sha_scaffold1716	240364	Chr_UP	20	6.4	Autosome	n.a.	S1_jap
Smp_163330	SC_0149	554275	6482	Autosome	Chr_UP	SJC_S005530	4642	Chr_UP	30	14	Z	Sha_scaffold1716	240364	Chr_UP	20	6.4	Autosome	n.a.	S1_jap
Smp_163340	SC_0149	525941	25433	Autosome	Chr_UP	SJC_S001288	31838	Chr_UP	46	24	Z	Sha_scaffold1716	240364	Chr_UP	20	6.4	Autosome	n.a.	S1_jap
Smp_164040	Chr_6	19280186	14380	Autosome	Chr_6	SJC_S000698	111844	Chr_UP	53	29	Z	Sha_scaffold685	386850	Chr_6	20	6.6	Autosome	n.a.	S1_jap
Smp_165610	SC_0156	297560	4103	Autosome	Chr_UP	SJC_S013763	1280	Chr_UP	16	7.4	Z	Sha_scaffold605	552705	Chr_UP	24	7.4	Autosome	n.a.	S1_jap
Smp_168700	Chr_6	6514197	365	Autosome	Chr_6	SJC_S003718	22062	Chr_6	33	17	Z	Sha_scaffold281	415703	Chr_4	27	8.2	Autosome	n.a.	S1_jap
Smp_168720	Chr_6	6593282	1947	Autosome	Chr_6	SJC_S025748	1062	Chr_6	27	14	Z	Sha_scaffold55	648287	Chr_6	25	7.7	Autosome	n.a.	S1_jap
Smp_168910	SC_0013	479074	7214	Autosome	Chr_UP	SJC_S000108	296063	Chr_UP	33	17	Z	Sha_scaffold539	84374	Chr_UP	32	10	Autosome	n.a.	S1_jap
Smp_168950	SC_0297	1385	8024	Autosome	Chr_UP	SJC_S001056	59240	Chr_UP	35	17	Z	Sha_scaffold839	409397	Chr_PSA	20	6.3	Autosome	n.a.	S1_jap
Smp_168960	SC_0297	49023	29519	Autosome	Chr_UP	SJC_S008428	17095	Chr_UP	32	13	Z	Sha_scaffold839	409397	Chr_PSA	20	6.3	Autosome	n.a.	S1_jap
Smp_176340	SC_0186	249865	11099	Autosome	Chr_UP	SJC_S001975	20790	Chr_UP	33	18	Z	Sha_scaffold14	425436	Chr_UP	25	7.9	Autosome	n.a.	S1_jap
Smp_176350	SC_0186	219108	22526	Autosome	Chr_UP	SJC_S000647	77365	Chr_UP	33	16	Z	Sha_scaffold14	425436	Chr_UP	25	7.9	Autosome	n.a.	S1_jap
Smp_176360	SC_0186	139959	71251	Autosome	Chr_UP	SJC_S000647	77365	Chr_UP	33	16	Z	Sha_scaffold14	425436	Chr_UP	25	7.9	Autosome	n.a.	S1_jap
Smp_176370	SC_0186	103152	10545	Autosome	Chr_UP	SJC_S000647	77365	Chr_UP	33	16	Z	Sha_scaffold14	425436	Chr_UP	25	7.9	Autosome	n.a.	S1_jap
Smp_177780	Chr_4	21101461	1574	Autosome	Chr_4	SJC_S025518	1050	Chr_4	15	6	Z	Sha_scaffold636	850956	Chr_4	24	7.5	Autosome	n.a.	S1_jap
Smp_178410	SC_0013	598614	9282	Autosome	Chr_UP	SJC_S000108	296063	Chr_UP	33	17	Z	Sha_scaffold585	34210	Chr_UP	34	11	Autosome	n.a.	S1_jap
Smp_181700	SC_0182	170725	676	Autosome	Chr_UP	SJC_S001983	23894	Chr_Z	33	15	Z	Sha_scaffold1399	641753	Chr_1	24	7.5	Autosome	n.a.	S1_jap
Smp_198740	SC_0013	943096	49309	Autosome	Chr_UP	SJC_S001396	37922	Chr_UP	31	16	Z	Sha_scaffold637	346796	Chr_UP	24	7.5	Autosome	n.a.	S1_jap
Smp_199050	SC_0186	346898	752	Autosome	Chr_UP	SJC_S002357	22702	Chr_UP	35	18	Z	Sha_scaffold14	425436	Chr_UP	25	7.9	Autosome	n.a.	S1_jap
Smp_202150	Chr_3	20394538	260	Autosome	Chr_3	SJC_S013200	4226	Chr_3	31	15	Z	Sha_scaffold120	319968	Chr_PSA	20	6.3	Autosome	n.a.	S1_jap
Smp_168490	Chr_1.unplaced.SC_0094	805559	458	Excluded	Chr_UP	SJC_S000164	168473	Chr_Z	39	21	Z	n.a.	n.a.	n.a.	n.a.	n.a.	n.a.	n.a.	n.a.
Smp_006240	Chr_ZW	12595611	651	Z	Chr_Z	n.a.	n.a.	n.a.	n.a.	n.a.	n.a.	Sha_scaffold3453	45782	Chr_Z	12	4.1	Z	n.a.	n.a.
Smp_011830	Chr_ZW	23842197	15691	Z	Chr_Z	n.a.	n.a.	n.a.	n.a.	n.a.	n.a.	Sha_scaffold2130	80138	Chr_Z	14	4.4	Z	n.a.	n.a.
Smp_019620	SC_0187	228560	11601	Z	Chr_newZ	n.a.	n.a.	n.a.	n.a.	n.a.	n.a.	Sha_scaffold963	142638	Chr_newZ	14	4.3	Z	n.a.	n.a.
Smp_019690	SC_0187	396372	1839	Z	Chr_newZ	SJC_S011451	2972	Chr_newZ	1	17	n.a.	Sha_scaffold2400	51627	Chr_newZ	14	4.3	Z	n.a.	n.a.
Smp_020880	Chr_ZW	11182851	1497	Z	Chr_Z	n.a.	n.a.	n.a.	n.a.	n.a.	n.a.	Sha_scaffold2447	262647	Chr_Z	14	4.4	Z	n.a.	n.a.
Smp_021370	Chr_ZW	24369074	10414	Z	Chr_Z	n.a.	n.a.	n.a.	n.a.	n.a.	n.a.	Sha_scaffold992	68109	Chr_UP	15	5.6	Z	n.a.	n.a.
Smp_022450	Chr_ZW	5760489	10684	Z	Chr_Z	n.a.	n.a.	n.a.	n.a.	n.a.	n.a.	Sha_scaffold1225	83311	Chr_Z	13	4.4	Z	n.a.	n.a.
Smp_028360	Chr_ZW.unplaced.SC_0115	516885	10256	Z	Chr_newZ	n.a.	n.a.	n.a.	n.a.	n.a.	n.a.	Sha_scaffold1300	379407	Chr_newZ	15	4.6	Z	n.a.	n.a.
Smp_028370	Chr_ZW.unplaced.SC_0115	547155	224	Z	Chr_newZ	n.a.	n.a.	n.a.	n.a.	n.a.	n.a.	Sha_scaffold1300	379407	Chr_newZ	15	4.6	Z	n.a.	n.a.
Smp_028410	Chr_ZW.unplaced.SC_0115	730006	783	Z	Chr_newZ	n.a.	n.a.	n.a.	n.a.	n.a.	n.a.	Sha_scaffold1300	379407	Chr_newZ	15	4.6	Z	n.a.	n.a.
Smp_028440	Chr_ZW.unplaced.SC_0115	757023	5279	Z	Chr_newZ	n.a.	n.a.	n.a.	n.a.	n.a.	n.a.	Sha_scaffold1300	379407	Chr_newZ	15	4.6	Z	n.a.	n.a.
Smp_028450	Chr_ZW.unplaced.SC_0115	775788	135	Z	Chr_newZ	n.a.	n.a.	n.a.	n.a.	n.a.	n.a.	Sha_scaffold1300	379407	Chr_newZ	15	4.6	Z	n.a.	n.a.
Smp_028690	Chr_ZW	4500681	36409	Z	Chr_Z	n.a.	n.a.	n.a.	n.a.	n.a.	n.a.	Sha_scaffold472	494879	Chr_Z	13	4.2	Z	n.a.	n.a.
Smp_031350	Chr_ZW	7667659	1041	Z	Chr_Z	n.a.	n.a.	n.a.	n.a.	n.a.	n.a.	Sha_scaffold998	966843	Chr_Z	13	4.2	Z	n.a.	n.a.
Smp_031390	SC_0288	29278	10539	Z	Chr_newZ	n.a.	n.a.	n.a.	n.a.	n.a.	n.a.	Sha_scaffold998	966843	Chr_Z	13	4.2	Z	n.a.	n.a.
Smp_032980	Chr_ZW	15307421	1743	Z	Chr_Z	n.a.	n.a.	n.a.	n.a.	n.a.	n.a.	Sha_scaffold2556	279375	Chr_Z	14	4.3	Z	n.a.	n.a.
Smp_032990	Chr_ZW	15318616	2243	Z	Chr_Z	n.a.	n.a.	n.a.	n.a.	n.a.	n.a.	Sha_scaffold2556	279375	Chr_Z	14	4.3	Z	n.a.	n.a.
Smp_036660	Chr_ZW	12122648	3263	Z	Chr_Z	n.a.	n.a.	n.a.	n.a.	n.a.	n.a.	Sha_scaffold422	1179553	Chr_Z	14	4.4	Z	n.a.	n.a.
Smp_036670	Chr_ZW	12126204	2775	Z	Chr_Z	n.a.	n.a.	n.a.	n.a.	n.a.	n.a.	Sha_scaffold422	1179553	Chr_Z	14	4.4	Z	n.a.	n.a.
Smp_037120	Chr_ZW	15731783	8222	Z	Chr_Z	n.a.	n.a.	n.a.	n.a.	n.a.	n.a.	Sha_scaffold1089	240715	Chr_Z	14	4.4	Z	n.a.	n.a.
Smp_053430	Chr_ZW	16453405	2491	Z	Chr_Z	n.a.	n.a.	n.a.	n.a.	n.a.	n.a.	Sha_scaffold271	336557	Chr_Z	14	4.4	Z	n.a.	n.a.
Smp_059250	SC_0129	841175	451	Z	Chr_newZ	n.a.	n.a.	n.a.	n.a.	n.a.	n.a.	Sha_C10196412	7768	Chr_newZ	12	3.9	Z	n.a.	n.a.
Smp_062620	Chr_ZW	25594192	2880	Z	Chr_Z	n.a.	n.a.	n.a.	n.a.	n.a.	n.a.	Sha_scaffold980	13386	Chr_Z	11	4.6	Z	n.a.	n.a.
Smp_067500	Chr_ZW	10855400	944	Z	Chr_Z	n.a.	n.a.	n.a.	n.a.	n.a.	n.a.	Sha_scaffold250	130469	Chr_Z	15	4.5	Z	n.a.	n.a.
Smp_068920	Chr_ZW	10109307	5235	Z	Chr_Z	n.a.	n.a.	n.a.	n.a.	n.a.	n.a.	Sha_scaffold1721	67976	Chr_Z	14	4.6	Z	n.a.	n.a.
Smp_078040	SC_0129	746926	1412	Z	Chr_newZ	n.a.	n.a.	n.a.	n.a.	n.a.	n.a.	Sha_scaffold3786	21420	Chr_newZ	11	3.8	Z	n.a.	n.a.
Smp_078070	SC_0111	355496	344	Z	Chr_newZ	n.a.	n.a.	n.a.	n.a.	n.a.	n.a.	Sha_scaffold164	326698	Chr_newZ	14	4.4	Z	n.a.	n.a.
Smp_078400	Chr_ZW	17402272	17884	Z	Chr_Z	n.a.	n.a.	n.a.	n.a.	n.a.	n.a.	Sha_scaffold1239	347083	Chr_Z	14	4.4	Z	n.a.	n.a.
Smp_079970	Chr_ZW	24707365	6760	Z	Chr_Z	n.a.	n.a.	n.a.	n.a.	n.a.	n.a.	Sha_scaffold824	605303	Chr_Z	14	4.4	Z	n.a.	n.a.
Smp_080420	Chr_ZW	26708265	1733	Z	Chr_Z	n.a.	n.a.	n.a.	n.a.	n.a.	n.a.	Sha_scaffold1385	224879	Chr_Z	15	4.6	Z	n.a.	n.a.
Smp_082240	SC_0111	1051360	502	Z	Chr_newZ	SJC_S014053	10496	Chr_newZ	0	16	n.a.	Sha_scaffold951	319925	Chr_Z	14	4.3	Z	n.a.	n.a.
Smp_091790	Chr_1.unplaced.SC_0034	1738022	24526	Z	Chr_newZ	n.a.	n.a.	n.a.	n.a.	n.a.	n.a.	Sha_scaffold2272	20488	Chr_newZ	12	4.1	Z	n.a.	n.a.
Smp_092570	SC_0129	760607	2940	Z	Chr_newZ	n.a.	n.a.	n.a.	n.a.	n.a.	n.a.	Sha_scaffold2034	98642	Chr_newZ	13	4.6	Z	n.a.	n.a.
Smp_093160	SC_0173	63111	18648	Z	Chr_newZ	n.a.	n.a.	n.a.	n.a.	n.a.	n.a.	Sha_scaffold649	294059	Chr_newZ	13	4.1	Z	n.a.	n.a.
Smp_093760	Chr_ZW	25394051	1226	Z	Chr_Z	n.a.	n.a.	n.a.	n.a.	n.a.	n.a.	Sha_scaffold666	209300	Chr_Z	11	3.7	Z	n.a.	n.a.
Smp_093780	Chr_3.unplaced.SC_0192	96067	4472	Z	Chr_newZ	n.a.	n.a.	n.a.	n.a.	n.a.	n.a.	Sha_scaffold3413	32490	Chr_newZ	14	4.5	Z	n.a.	n.a.
Smp_096390	Chr_ZW	14595703	3349	Z	Chr_Z	n.a.	n.a.	n.a.	n.a.	n.a.	n.a.	Sha_scaffold452	276764	Chr_Z	14	4.4	Z	n.a.	n.a.
Smp_096420	Chr_ZW	14540552	8163	Z	Chr_Z	n.a.	n.a.	n.a.	n.a.	n.a.	n.a.	Sha_scaffold452	276764	Chr_Z	14	4.4	Z	n.a.	n.a.
Smp_102000	Chr_2	5259232	7968	Z	Chr_newZ	n.a.	n.a.	n.a.	n.a.	n.a.	n.a.	Sha_scaffold997	245234	Chr_newZ	14	4.3	Z	n.a.	n.a.
Smp_103090	Chr_ZW	26887907	7977	Z	Chr_Z	n.a.	n.a.	n.a.	n.a.	n.a.	n.a.	Sha_scaffold617	312176	Chr_Z	13	4.2	Z	n.a.	n.a.
Smp_104730	Chr_ZW	9536672	3719	Z	Chr_Z	n.a.	n.a.	n.a.	n.a.	n.a.	n.a.	Sha_scaffold951	319925	Chr_Z	14	4.3	Z	n.a.	n.a.
Smp_113680	Chr_3.unplaced.SC_0192	159990	320	Z	Chr_newZ	n.a.	n.a.	n.a.	n.a.	n.a.	n.a.	Sha_scaffold688	111118	Chr_newZ	12	3.9	Z	n.a.	n.a.
Smp_114870	SC_0129	749787	1421	Z	Chr_newZ	n.a.	n.a.	n.a.	n.a.	n.a.	n.a.	Sha_scaffold2005	41733	Chr_newZ	14	5.2	Z	n.a.	n.a.
Smp_115510	Chr_ZW.unplaced.SC_0115	566707	677	Z	Chr_newZ	n.a.	n.a.	n.a.	n.a.	n.a.	n.a.	Sha_scaffold1300	379407	Chr_newZ	15	4.6	Z	n.a.	n.a.
Smp_125570	Chr_ZW	12719433	7686	Z	Chr_Z	n.a.	n.a.	n.a.	n.a.	n.a.	n.a.	Sha_scaffold717	216658	Chr_Z	13	4.1	Z	n.a.	n.a.
Smp_126340	Chr_ZW	8129378	5433	Z	Chr_Z	n.a.	n.a.	n.a.	n.a.	n.a.	n.a.	Sha_scaffold531	917805	Chr_Z	14	4.3	Z	n.a.	n.a.
Smp_128340	Chr_ZW	19281520	2714	Z	Chr_Z	n.a.	n.a.	n.a.	n.a.	n.a.	n.a.	Sha_scaffold740	649873	Chr_Z	14	4.4	Z	n.a.	n.a.
Smp_128560	Chr_ZW	18442728	11633	Z	Chr_Z	n.a.	n.a.	n.a.	n.a.	n.a.	n.a.	Sha_scaffold2736	317484	Chr_Z	14	4.4	Z	n.a.	n.a.
Smp_128570	Chr_ZW	18527857	14254	Z	Chr_Z	n.a.	n.a.	n.a.	n.a.	n.a.	n.a.	Sha_scaffold2736	317484	Chr_Z	14	4.4	Z	n.a.	n.a.
Smp_128670	Chr_ZW	19028601	4604	Z	Chr_Z	n.a.	n.a.	n.a.	n.a.	n.a.	n.a.	Sha_scaffold1463	120812	Chr_Z	13	4.3	Z	n.a.	n.a.
Smp_131170	Chr_ZW	23672166	1603	Z	Chr_Z	n.a.	n.a.	n.a.	n.a.	n.a.	n.a.	Sha_scaffold155	130586	Chr_Z	13	4	Z	n.a.	n.a.
Smp_133530	Chr_ZW	11127656	24511	Z	Chr_Z	n.a.	n.a.	n.a.	n.a.	n.a.	n.a.	Sha_scaffold2447	262647	Chr_Z	14	4.4	Z	n.a.	n.a.
Smp_133760	Chr_ZW	24393321	2875	Z	Chr_Z	n.a.	n.a.	n.a.	n.a.	n.a.	n.a.	Sha_scaffold737	171283	Chr_Z	13	4.2	Z	n.a.	n.a.
Smp_133780	Chr_ZW	24470800	1157	Z	Chr_Z	n.a.	n.a.	n.a.	n.a.	n.a.	n.a.	Sha_scaffold737	171283	Chr_Z	13	4.2	Z	n.a.	n.a.
Smp_134230	Chr_ZW	5685014	19075	Z	Chr_Z	n.a.	n.a.	n.a.	n.a.	n.a.	n.a.	Sha_scaffold1225	83311	Chr_Z	13	4.4	Z	n.a.	n.a.
Smp_134260	Chr_2	5371158	30673	Z	Chr_newZ	n.a.	n.a.	n.a.	n.a.	n.a.	n.a.	Sha_scaffold997	245234	Chr_newZ	14	4.3	Z	n.a.	n.a.
Smp_134340	Chr_ZW	9448443	1365	Z	Chr_Z	n.a.	n.a.	n.a.	n.a.	n.a.	n.a.	Sha_scaffold1217	115473	Chr_UP	14	4.4	Z	n.a.	n.a.
Smp_134990	Chr_ZW	11436449	60616	Z	Chr_Z	n.a.	n.a.	n.a.	n.a.	n.a.	n.a.	Sha_scaffold422	1179553	Chr_Z	14	4.4	Z	n.a.	n.a.
Smp_135000	Chr_ZW	11425989	1915	Z	Chr_Z	n.a.	n.a.	n.a.	n.a.	n.a.	n.a.	Sha_scaffold422	1179553	Chr_Z	14	4.4	Z	n.a.	n.a.
Smp_137500	Chr_ZW.unplaced.SC_0115	482114	236	Z	Chr_newZ	n.a.	n.a.	n.a.	n.a.	n.a.	n.a.	Sha_scaffold688	111118	Chr_newZ	12	3.9	Z	n.a.	n.a.
Smp_137520	Chr_ZW.unplaced.SC_0115	600155	10611	Z	Chr_newZ	n.a.	n.a.	n.a.	n.a.	n.a.	n.a.	Sha_scaffold1300	379407	Chr_newZ	15	4.6	Z	n.a.	n.a.
Smp_137530	Chr_ZW.unplaced.SC_0115	674929	40598	Z	Chr_newZ	n.a.	n.a.	n.a.	n.a.	n.a.	n.a.	Sha_scaffold1300	379407	Chr_newZ	15	4.6	Z	n.a.	n.a.
Smp_137540	Chr_ZW.unplaced.SC_0115	732706	14831	Z	Chr_newZ	n.a.	n.a.	n.a.	n.a.	n.a.	n.a.	Sha_scaffold1300	379407	Chr_newZ	15	4.6	Z	n.a.	n.a.
Smp_138990	Chr_ZW	6801588	5099	Z	Chr_Z	n.a.	n.a.	n.a.	n.a.	n.a.	n.a.	Sha_scaffold3100	42638	Chr_Z	13	4	Z	n.a.	n.a.
Smp_146150	Chr_ZW	14025480	712	Z	Chr_Z	n.a.	n.a.	n.a.	n.a.	n.a.	n.a.	Sha_scaffold764	252691	Chr_Z	13	4.1	Z	n.a.	n.a.
Smp_146220	Chr_ZW	12880461	8994	Z	Chr_Z	n.a.	n.a.	n.a.	n.a.	n.a.	n.a.	Sha_scaffold3596	51740	Chr_Z	12	4	Z	n.a.	n.a.
Smp_147430	Chr_ZW	28703083	20461	Z	Chr_Z	n.a.	n.a.	n.a.	n.a.	n.a.	n.a.	Sha_scaffold1504	506468	Chr_Z	14	4.4	Z	n.a.	n.a.
Smp_153770	Chr_ZW	12442652	18942	Z	Chr_Z	n.a.	n.a.	n.a.	n.a.	n.a.	n.a.	Sha_scaffold3055	36357	Chr_Z	11	3.3	Z	n.a.	n.a.
Smp_154020	Chr_ZW	15009964	84826	Z	Chr_Z	n.a.	n.a.	n.a.	n.a.	n.a.	n.a.	Sha_scaffold369	224453	Chr_Z	12	3.9	Z	n.a.	n.a.
Smp_154050	SC_0129	642104	16786	Z	Chr_newZ	n.a.	n.a.	n.a.	n.a.	n.a.	n.a.	Sha_scaffold1288	191514	Chr_newZ	12	4.2	Z	n.a.	n.a.
Smp_154070	SC_0129	601704	410	Z	Chr_newZ	n.a.	n.a.	n.a.	n.a.	n.a.	n.a.	Sha_scaffold1288	191514	Chr_newZ	12	4.2	Z	n.a.	n.a.
Smp_154360	Chr_ZW	24160210	17024	Z	Chr_Z	n.a.	n.a.	n.a.	n.a.	n.a.	n.a.	Sha_scaffold59	264706	Chr_Z	13	4.2	Z	n.a.	n.a.
Smp_154390	Chr_ZW	24062902	1610	Z	Chr_Z	n.a.	n.a.	n.a.	n.a.	n.a.	n.a.	Sha_scaffold59	264706	Chr_Z	13	4.2	Z	n.a.	n.a.
Smp_159080	Chr_ZW	25045062	1824	Z	Chr_Z	n.a.	n.a.	n.a.	n.a.	n.a.	n.a.	Sha_scaffold824	605303	Chr_Z	14	4.4	Z	n.a.	n.a.
Smp_159480	Chr_ZW	9997119	371	Z	Chr_Z	n.a.	n.a.	n.a.	n.a.	n.a.	n.a.	Sha_scaffold1051	257216	Chr_Z	15	4.5	Z	n.a.	n.a.
Smp_161090	SC_0136	428557	2764	Z	Chr_newZ	n.a.	n.a.	n.a.	n.a.	n.a.	n.a.	Sha_scaffold1899	19563	Chr_newZ	12	4.2	Z	n.a.	n.a.
Smp_165570	Chr_ZW	17225112	41162	Z	Chr_Z	n.a.	n.a.	n.a.	n.a.	n.a.	n.a.	Sha_scaffold1239	347083	Chr_Z	14	4.4	Z	n.a.	n.a.
Smp_168310	Chr_ZW	3709765	28344	Z	Chr_Z	n.a.	n.a.	n.a.	n.a.	n.a.	n.a.	Sha_scaffold1231	36761	Chr_Z	10	3.5	Z	n.a.	n.a.
Smp_170040	Chr_ZW	27403001	710	Z	Chr_Z	n.a.	n.a.	n.a.	n.a.	n.a.	n.a.	Sha_scaffold1517	416780	Chr_Z	14	4.4	Z	n.a.	n.a.
Smp_173520	SC_0136	302191	188	Z	Chr_newZ	n.a.	n.a.	n.a.	n.a.	n.a.	n.a.	Sha_scaffold2596	37909	Chr_newZ	14	4.6	Z	n.a.	n.a.
Smp_173910	Chr_ZW	27275255	5827	Z	Chr_Z	n.a.	n.a.	n.a.	n.a.	n.a.	n.a.	Sha_scaffold2609	81274	Chr_Z	13	4.1	Z	n.a.	n.a.
Smp_174200	Chr_ZW	18119063	5910	Z	Chr_Z	n.a.	n.a.	n.a.	n.a.	n.a.	n.a.	Sha_scaffold1406	127494	Chr_Z	15	4.7	Z	n.a.	n.a.
Smp_174290	SC_0196	84799	6012	Z	Chr_newZ	n.a.	n.a.	n.a.	n.a.	n.a.	n.a.	Sha_scaffold1833	57062	Chr_newZ	9.6	3.4	Z	n.a.	n.a.
Smp_174340	Chr_ZW	16886951	3704	Z	Chr_Z	n.a.	n.a.	n.a.	n.a.	n.a.	n.a.	Sha_scaffold2059	271576	Chr_Z	14	4.5	Z	n.a.	n.a.
Smp_174870	Chr_ZW	14688766	8490	Z	Chr_Z	n.a.	n.a.	n.a.	n.a.	n.a.	n.a.	Sha_scaffold452	276764	Chr_Z	14	4.4	Z	n.a.	n.a.
Smp_174900	Chr_ZW	14736976	7343	Z	Chr_Z	n.a.	n.a.	n.a.	n.a.	n.a.	n.a.	Sha_scaffold470	207824	Chr_Z	14	4.4	Z	n.a.	n.a.
Smp_175060	Chr_ZW	14536620	3293	Z	Chr_Z	n.a.	n.a.	n.a.	n.a.	n.a.	n.a.	Sha_scaffold452	276764	Chr_Z	14	4.4	Z	n.a.	n.a.
Smp_175070	Chr_ZW	14493227	8459	Z	Chr_Z	n.a.	n.a.	n.a.	n.a.	n.a.	n.a.	Sha_scaffold452	276764	Chr_Z	14	4.4	Z	n.a.	n.a.
Smp_179030	Chr_ZW	16998245	10826	Z	Chr_Z	n.a.	n.a.	n.a.	n.a.	n.a.	n.a.	Sha_scaffold102	48603	Chr_Z	14	4.4	Z	n.a.	n.a.
Smp_180650	Chr_ZW	9556420	269	Z	Chr_Z	n.a.	n.a.	n.a.	n.a.	n.a.	n.a.	Sha_scaffold951	319925	Chr_Z	14	4.3	Z	n.a.	n.a.
Smp_186950	SC_0173	269789	575	Z	Chr_newZ	n.a.	n.a.	n.a.	n.a.	n.a.	n.a.	Sha_scaffold552	192776	Chr_newZ	11	3.7	Z	n.a.	n.a.
Smp_187290	SC_0129	662042	164	Z	Chr_newZ	n.a.	n.a.	n.a.	n.a.	n.a.	n.a.	Sha_scaffold1288	191514	Chr_newZ	12	4.2	Z	n.a.	n.a.
Smp_188230	Chr_ZW	14553261	533	Z	Chr_Z	n.a.	n.a.	n.a.	n.a.	n.a.	n.a.	Sha_scaffold452	276764	Chr_Z	14	4.4	Z	n.a.	n.a.
Smp_189850	Chr_ZW	16181183	236	Z	Chr_Z	n.a.	n.a.	n.a.	n.a.	n.a.	n.a.	Sha_scaffold1844	231660	Chr_Z	14	4.4	Z	n.a.	n.a.
Smp_191160	Chr_ZW	25369017	827	Z	Chr_Z	n.a.	n.a.	n.a.	n.a.	n.a.	n.a.	Sha_scaffold1291	23446	Chr_Z	12	4.1	Z	n.a.	n.a.
Smp_194240	SC_0136	752981	16769	Z	Chr_newZ	n.a.	n.a.	n.a.	n.a.	n.a.	n.a.	Sha_scaffold1618	152570	Chr_newZ	13	4	Z	n.a.	n.a.
Smp_194260	SC_0278	84850	7548	Z	Chr_newZ	n.a.	n.a.	n.a.	n.a.	n.a.	n.a.	Sha_scaffold3266	82762	Chr_newZ	13	4.1	Z	n.a.	n.a.
Smp_194290	SC_0278	43795	356	Z	Chr_newZ	n.a.	n.a.	n.a.	n.a.	n.a.	n.a.	Sha_scaffold3266	82762	Chr_newZ	13	4.1	Z	n.a.	n.a.
Smp_194300	SC_0278	3935	146	Z	Chr_newZ	n.a.	n.a.	n.a.	n.a.	n.a.	n.a.	Sha_scaffold1618	152570	Chr_newZ	13	4	Z	n.a.	n.a.
Smp_196010	Chr_ZW.unplaced.SC_0115	639029	17923	Z	Chr_newZ	n.a.	n.a.	n.a.	n.a.	n.a.	n.a.	Sha_scaffold1300	379407	Chr_newZ	15	4.6	Z	n.a.	n.a.
Smp_198680	Chr_ZW.unplaced.SC_0115	489484	24105	Z	Chr_newZ	n.a.	n.a.	n.a.	n.a.	n.a.	n.a.	Sha_scaffold1300	379407	Chr_newZ	15	4.6	Z	n.a.	n.a.
Smp_198900	SC_0136	854452	554	Z	Chr_newZ	n.a.	n.a.	n.a.	n.a.	n.a.	n.a.	Sha_scaffold1618	152570	Chr_newZ	13	4	Z	n.a.	n.a.
Smp_203370	Chr_ZW	5772805	164	Z	Chr_Z	n.a.	n.a.	n.a.	n.a.	n.a.	n.a.	Sha_scaffold1225	83311	Chr_Z	13	4.4	Z	n.a.	n.a.
Smp_203440	Chr_ZW	12385559	212	Z	Chr_Z	n.a.	n.a.	n.a.	n.a.	n.a.	n.a.	Sha_scaffold422	1179553	Chr_Z	14	4.4	Z	n.a.	n.a.
Smp_203460	Chr_ZW	14527597	200	Z	Chr_Z	n.a.	n.a.	n.a.	n.a.	n.a.	n.a.	Sha_scaffold452	276764	Chr_Z	14	4.4	Z	n.a.	n.a.
Smp_203470	Chr_ZW	16486784	254	Z	Chr_Z	n.a.	n.a.	n.a.	n.a.	n.a.	n.a.	Sha_scaffold271	336557	Chr_Z	14	4.4	Z	n.a.	n.a.
Smp_203540	Chr_ZW	23869157	344	Z	Chr_Z	n.a.	n.a.	n.a.	n.a.	n.a.	n.a.	Sha_scaffold2130	80138	Chr_Z	14	4.4	Z	n.a.	n.a.
Smp_203580	Chr_ZW	26812006	2457	Z	Chr_Z	n.a.	n.a.	n.a.	n.a.	n.a.	n.a.	Sha_scaffold617	312176	Chr_Z	13	4.2	Z	n.a.	n.a.
Smp_204070	Chr_ZW	11674088	290	Z	Chr_Z	n.a.	n.a.	n.a.	n.a.	n.a.	n.a.	Sha_scaffold422	1179553	Chr_Z	14	4.4	Z	n.a.	n.a.
Smp_204100	Chr_ZW	19422155	200	Z	Chr_Z	n.a.	n.a.	n.a.	n.a.	n.a.	n.a.	Sha_scaffold740	649873	Chr_Z	14	4.4	Z	n.a.	n.a.
Smp_204340	Chr_ZW	4117311	209	Z	Chr_Z	n.a.	n.a.	n.a.	n.a.	n.a.	n.a.	Sha_scaffold472	494879	Chr_Z	13	4.2	Z	n.a.	n.a.
Smp_204350	Chr_ZW	4180036	224	Z	Chr_Z	n.a.	n.a.	n.a.	n.a.	n.a.	n.a.	Sha_scaffold472	494879	Chr_Z	13	4.2	Z	n.a.	n.a.
Smp_204380	Chr_ZW.unplaced.SC_0115	621639	3632	Z	Chr_newZ	n.a.	n.a.	n.a.	n.a.	n.a.	n.a.	Sha_scaffold1300	379407	Chr_newZ	15	4.6	Z	n.a.	n.a.
Smp_210540	Chr_ZW	28367708	8527	Z	Chr_Z	n.a.	n.a.	n.a.	n.a.	n.a.	n.a.	Sha_scaffold2343	56973	Chr_Z	13	3.9	Z	n.a.	n.a.
Smp_210850	Chr_ZW	27695294	127349	Z	Chr_Z	n.a.	n.a.	n.a.	n.a.	n.a.	n.a.	Sha_scaffold1517	416780	Chr_Z	14	4.4	Z	n.a.	n.a.
Smp_000330	SC_0187	128654	80	Z	Chr_newZ	n.a.	n.a.	n.a.	n.a.	n.a.	n.a.	n.a.	n.a.	n.a.	n.a.	n.a.	n.a.	n.a.	n.a.
Smp_001280	Chr_2	32160728	23762	Z	Chr_newZ	n.a.	n.a.	n.a.	n.a.	n.a.	n.a.	Sha_C10134895	n.a.	Chr_newZ	0	0	n.a.	n.a.	n.a.
Smp_012230.2	Chr_ZW	19175029	56	Z	Chr_Z	n.a.	n.a.	n.a.	n.a.	n.a.	n.a.	n.a.	n.a.	n.a.	n.a.	n.a.	n.a.	n.a.	n.a.
Smp_019810	SC_0136	410631	1922	Z	Chr_newZ	n.a.	n.a.	n.a.	n.a.	n.a.	n.a.	n.a.	n.a.	n.a.	n.a.	n.a.	n.a.	n.a.	n.a.
Smp_022480	Chr_ZW	5708231	1317	Z	Chr_Z	n.a.	n.a.	n.a.	n.a.	n.a.	n.a.	n.a.	n.a.	n.a.	n.a.	n.a.	n.a.	n.a.	n.a.
Smp_022520	Chr_ZW	5650082	2388	Z	Chr_Z	n.a.	n.a.	n.a.	n.a.	n.a.	n.a.	n.a.	n.a.	n.a.	n.a.	n.a.	n.a.	n.a.	n.a.
Smp_022710	Chr_ZW	9493212	162	Z	Chr_Z	n.a.	n.a.	n.a.	n.a.	n.a.	n.a.	n.a.	n.a.	n.a.	n.a.	n.a.	n.a.	n.a.	n.a.
Smp_028500	Chr_ZW.unplaced.SC_0115	910043	69	Z	Chr_newZ	n.a.	n.a.	n.a.	n.a.	n.a.	n.a.	n.a.	n.a.	n.a.	n.a.	n.a.	n.a.	n.a.	n.a.
Smp_037690	SC_0136	589756	993	Z	Chr_newZ	n.a.	n.a.	n.a.	n.a.	n.a.	n.a.	n.a.	n.a.	n.a.	n.a.	n.a.	n.a.	n.a.	n.a.
Smp_061980	Chr_ZW	29887875	296	Z	Chr_Z	n.a.	n.a.	n.a.	n.a.	n.a.	n.a.	n.a.	n.a.	n.a.	n.a.	n.a.	n.a.	n.a.	n.a.
Smp_078010	Chr_1.unplaced.SC_0034	2210186	410	Z	Chr_newZ	n.a.	n.a.	n.a.	n.a.	n.a.	n.a.	n.a.	n.a.	n.a.	n.a.	n.a.	n.a.	n.a.	n.a.
Smp_092580	SC_0129	758925	380	Z	Chr_newZ	n.a.	n.a.	n.a.	n.a.	n.a.	n.a.	n.a.	n.a.	n.a.	n.a.	n.a.	n.a.	n.a.	n.a.
Smp_095200	Chr_ZW	16846490	281	Z	Chr_Z	n.a.	n.a.	n.a.	n.a.	n.a.	n.a.	n.a.	n.a.	n.a.	n.a.	n.a.	n.a.	n.a.	n.a.
Smp_097720	Chr_2	5583403	110	Z	Chr_newZ	n.a.	n.a.	n.a.	n.a.	n.a.	n.a.	Sha_C10102779	n.a.	Chr_newZ	0	0	n.a.	n.a.	n.a.
Smp_100540	Chr_ZW	11662353	407	Z	Chr_Z	n.a.	n.a.	n.a.	n.a.	n.a.	n.a.	n.a.	n.a.	n.a.	n.a.	n.a.	n.a.	n.a.	n.a.
Smp_113520	Chr_1.unplaced.SC_0034	2104650	935	Z	Chr_newZ	n.a.	n.a.	n.a.	n.a.	n.a.	n.a.	n.a.	n.a.	n.a.	n.a.	n.a.	n.a.	n.a.	n.a.
Smp_114540	Chr_ZW	7534863	830	Z	Chr_Z	n.a.	n.a.	n.a.	n.a.	n.a.	n.a.	n.a.	n.a.	n.a.	n.a.	n.a.	n.a.	n.a.	n.a.
Smp_120020	Chr_1.unplaced.SC_0034	2123885	1346	Z	Chr_newZ	n.a.	n.a.	n.a.	n.a.	n.a.	n.a.	n.a.	n.a.	n.a.	n.a.	n.a.	n.a.	n.a.	n.a.
Smp_120330	SC_0251	142335	744	Z	Chr_newZ	n.a.	n.a.	n.a.	n.a.	n.a.	n.a.	n.a.	n.a.	n.a.	n.a.	n.a.	n.a.	n.a.	n.a.
Smp_127260	SC_0187	51165	845	Z	Chr_newZ	n.a.	n.a.	n.a.	n.a.	n.a.	n.a.	n.a.	n.a.	n.a.	n.a.	n.a.	n.a.	n.a.	n.a.
Smp_127290	SC_0187	135167	2304	Z	Chr_newZ	n.a.	n.a.	n.a.	n.a.	n.a.	n.a.	n.a.	n.a.	n.a.	n.a.	n.a.	n.a.	n.a.	n.a.
Smp_128430	Chr_ZW	23683591	38197	Z	Chr_Z	n.a.	n.a.	n.a.	n.a.	n.a.	n.a.	n.a.	n.a.	n.a.	n.a.	n.a.	n.a.	n.a.	n.a.
Smp_130390	SC_0340	47823	23	Z	Chr_newZ	n.a.	n.a.	n.a.	n.a.	n.a.	n.a.	n.a.	n.a.	n.a.	n.a.	n.a.	n.a.	n.a.	n.a.
Smp_132960	SC_0136	125922	1393	Z	Chr_newZ	n.a.	n.a.	n.a.	n.a.	n.a.	n.a.	n.a.	n.a.	n.a.	n.a.	n.a.	n.a.	n.a.	n.a.
Smp_132990	SC_0136	176235	9988	Z	Chr_newZ	n.a.	n.a.	n.a.	n.a.	n.a.	n.a.	n.a.	n.a.	n.a.	n.a.	n.a.	n.a.	n.a.	n.a.
Smp_133930	SC_0129	102365	879	Z	Chr_newZ	n.a.	n.a.	n.a.	n.a.	n.a.	n.a.	n.a.	n.a.	n.a.	n.a.	n.a.	n.a.	n.a.	n.a.
Smp_134240	Chr_2	5307170	287	Z	Chr_newZ	n.a.	n.a.	n.a.	n.a.	n.a.	n.a.	n.a.	n.a.	n.a.	n.a.	n.a.	n.a.	n.a.	n.a.
Smp_134270	Chr_2	5435241	3596	Z	Chr_newZ	n.a.	n.a.	n.a.	n.a.	n.a.	n.a.	n.a.	n.a.	n.a.	n.a.	n.a.	n.a.	n.a.	n.a.
Smp_134310	Chr_2	5632095	119	Z	Chr_newZ	n.a.	n.a.	n.a.	n.a.	n.a.	n.a.	n.a.	n.a.	n.a.	n.a.	n.a.	n.a.	n.a.	n.a.
Smp_138580	SC_0111	34239	257	Z	Chr_newZ	n.a.	n.a.	n.a.	n.a.	n.a.	n.a.	n.a.	n.a.	n.a.	n.a.	n.a.	n.a.	n.a.	n.a.
Smp_139960	Chr_ZW	15268980	83	Z	Chr_Z	n.a.	n.a.	n.a.	n.a.	n.a.	n.a.	n.a.	n.a.	n.a.	n.a.	n.a.	n.a.	n.a.	n.a.
Smp_141750	Chr_ZW	25591758	26	Z	Chr_Z	n.a.	n.a.	n.a.	n.a.	n.a.	n.a.	n.a.	n.a.	n.a.	n.a.	n.a.	n.a.	n.a.	n.a.
Smp_141870	Chr_ZW	11960065	845	Z	Chr_Z	n.a.	n.a.	n.a.	n.a.	n.a.	n.a.	n.a.	n.a.	n.a.	n.a.	n.a.	n.a.	n.a.	n.a.
Smp_142200	Chr_ZW	15558966	490	Z	Chr_Z	n.a.	n.a.	n.a.	n.a.	n.a.	n.a.	n.a.	n.a.	n.a.	n.a.	n.a.	n.a.	n.a.	n.a.
Smp_146130	Chr_ZW	14100503	280	Z	Chr_Z	n.a.	n.a.	n.a.	n.a.	n.a.	n.a.	n.a.	n.a.	n.a.	n.a.	n.a.	n.a.	n.a.	n.a.
Smp_149780	Chr_ZW	9970319	6482	Z	Chr_Z	n.a.	n.a.	n.a.	n.a.	n.a.	n.a.	n.a.	n.a.	n.a.	n.a.	n.a.	n.a.	n.a.	n.a.
Smp_151790	Chr_ZW	25800985	1109	Z	Chr_Z	n.a.	n.a.	n.a.	n.a.	n.a.	n.a.	n.a.	n.a.	n.a.	n.a.	n.a.	n.a.	n.a.	n.a.
Smp_152070	Chr_2	5224593	3782	Z	Chr_newZ	n.a.	n.a.	n.a.	n.a.	n.a.	n.a.	n.a.	n.a.	n.a.	n.a.	n.a.	n.a.	n.a.	n.a.
Smp_159130	Chr_ZW	25508456	221	Z	Chr_Z	n.a.	n.a.	n.a.	n.a.	n.a.	n.a.	n.a.	n.a.	n.a.	n.a.	n.a.	n.a.	n.a.	n.a.
Smp_159500	Chr_ZW	10103757	845	Z	Chr_Z	n.a.	n.a.	n.a.	n.a.	n.a.	n.a.	n.a.	n.a.	n.a.	n.a.	n.a.	n.a.	n.a.	n.a.
Smp_164750	SC_0234	124359	2501	Z	Chr_newZ	n.a.	n.a.	n.a.	n.a.	n.a.	n.a.	n.a.	n.a.	n.a.	n.a.	n.a.	n.a.	n.a.	n.a.
Smp_166510	SC_0111	615919	8108	Z	Chr_newZ	n.a.	n.a.	n.a.	n.a.	n.a.	n.a.	n.a.	n.a.	n.a.	n.a.	n.a.	n.a.	n.a.	n.a.
Smp_166600	SC_0111	1027935	20220	Z	Chr_newZ	n.a.	n.a.	n.a.	n.a.	n.a.	n.a.	n.a.	n.a.	n.a.	n.a.	n.a.	n.a.	n.a.	n.a.
Smp_172750	Chr_ZW	24181448	22900	Z	Chr_Z	n.a.	n.a.	n.a.	n.a.	n.a.	n.a.	n.a.	n.a.	n.a.	n.a.	n.a.	n.a.	n.a.	n.a.
Smp_172880	Chr_ZW	19049499	1640	Z	Chr_Z	n.a.	n.a.	n.a.	n.a.	n.a.	n.a.	n.a.	n.a.	n.a.	n.a.	n.a.	n.a.	n.a.	n.a.
Smp_173920	Chr_ZW	27247008	1095	Z	Chr_Z	n.a.	n.a.	n.a.	n.a.	n.a.	n.a.	n.a.	n.a.	n.a.	n.a.	n.a.	n.a.	n.a.	n.a.
Smp_173930	Chr_ZW	27228327	1906	Z	Chr_Z	n.a.	n.a.	n.a.	n.a.	n.a.	n.a.	n.a.	n.a.	n.a.	n.a.	n.a.	n.a.	n.a.	n.a.
Smp_174050	Chr_ZW	17529981	62	Z	Chr_Z	n.a.	n.a.	n.a.	n.a.	n.a.	n.a.	n.a.	n.a.	n.a.	n.a.	n.a.	n.a.	n.a.	n.a.
Smp_174080	Chr_ZW	28053457	320	Z	Chr_Z	n.a.	n.a.	n.a.	n.a.	n.a.	n.a.	n.a.	n.a.	n.a.	n.a.	n.a.	n.a.	n.a.	n.a.
Smp_174100	Chr_ZW	28009249	17924	Z	Chr_Z	n.a.	n.a.	n.a.	n.a.	n.a.	n.a.	n.a.	n.a.	n.a.	n.a.	n.a.	n.a.	n.a.	n.a.
Smp_174280	SC_0196	89513	50	Z	Chr_newZ	n.a.	n.a.	n.a.	n.a.	n.a.	n.a.	n.a.	n.a.	n.a.	n.a.	n.a.	n.a.	n.a.	n.a.
Smp_174330	Chr_ZW	16845596	275	Z	Chr_Z	n.a.	n.a.	n.a.	n.a.	n.a.	n.a.	n.a.	n.a.	n.a.	n.a.	n.a.	n.a.	n.a.	n.a.
Smp_175080	Chr_ZW	14466824	845	Z	Chr_Z	n.a.	n.a.	n.a.	n.a.	n.a.	n.a.	n.a.	n.a.	n.a.	n.a.	n.a.	n.a.	n.a.	n.a.
Smp_177290	Chr_ZW	28915690	47	Z	Chr_Z	n.a.	n.a.	n.a.	n.a.	n.a.	n.a.	n.a.	n.a.	n.a.	n.a.	n.a.	n.a.	n.a.	n.a.
Smp_178760	Chr_ZW	26365456	284	Z	Chr_Z	n.a.	n.a.	n.a.	n.a.	n.a.	n.a.	n.a.	n.a.	n.a.	n.a.	n.a.	n.a.	n.a.	n.a.
Smp_179100	Chr_ZW	5493688	1616	Z	Chr_Z	n.a.	n.a.	n.a.	n.a.	n.a.	n.a.	n.a.	n.a.	n.a.	n.a.	n.a.	n.a.	n.a.	n.a.
Smp_182870	Chr_ZW	7698525	284	Z	Chr_Z	n.a.	n.a.	n.a.	n.a.	n.a.	n.a.	n.a.	n.a.	n.a.	n.a.	n.a.	n.a.	n.a.	n.a.
Smp_183760	Chr_ZW	25913420	140	Z	Chr_Z	n.a.	n.a.	n.a.	n.a.	n.a.	n.a.	n.a.	n.a.	n.a.	n.a.	n.a.	n.a.	n.a.	n.a.
Smp_184420	Chr_ZW	3693841	638	Z	Chr_Z	SJC_S005144	1909	Chr_Z	1	1.9	n.a.	n.a.	n.a.	n.a.	n.a.	n.a.	n.a.	n.a.	n.a.
Smp_190530	Chr_ZW	8029415	410	Z	Chr_Z	n.a.	n.a.	n.a.	n.a.	n.a.	n.a.	n.a.	n.a.	n.a.	n.a.	n.a.	n.a.	n.a.	n.a.
Smp_193270	SC_0251	155265	197	Z	Chr_newZ	n.a.	n.a.	n.a.	n.a.	n.a.	n.a.	n.a.	n.a.	n.a.	n.a.	n.a.	n.a.	n.a.	n.a.
Smp_198500	Chr_ZW	15539789	104	Z	Chr_Z	n.a.	n.a.	n.a.	n.a.	n.a.	n.a.	n.a.	n.a.	n.a.	n.a.	n.a.	n.a.	n.a.	n.a.
Smp_198600	Chr_ZW	7886175	164	Z	Chr_Z	n.a.	n.a.	n.a.	n.a.	n.a.	n.a.	n.a.	n.a.	n.a.	n.a.	n.a.	n.a.	n.a.	n.a.
Smp_198880	SC_0129	196917	134	Z	Chr_newZ	n.a.	n.a.	n.a.	n.a.	n.a.	n.a.	n.a.	n.a.	n.a.	n.a.	n.a.	n.a.	n.a.	n.a.
Smp_203380	Chr_ZW	7108443	386	Z	Chr_Z	n.a.	n.a.	n.a.	n.a.	n.a.	n.a.	n.a.	n.a.	n.a.	n.a.	n.a.	n.a.	n.a.	n.a.
Smp_203550	Chr_ZW	24246469	179	Z	Chr_Z	n.a.	n.a.	n.a.	n.a.	n.a.	n.a.	n.a.	n.a.	n.a.	n.a.	n.a.	n.a.	n.a.	n.a.
Smp_203620	Chr_ZW	29012318	872	Z	Chr_Z	n.a.	n.a.	n.a.	n.a.	n.a.	n.a.	n.a.	n.a.	n.a.	n.a.	n.a.	n.a.	n.a.	n.a.
Smp_204090	Chr_ZW	14481694	203	Z	Chr_Z	n.a.	n.a.	n.a.	n.a.	n.a.	n.a.	n.a.	n.a.	n.a.	n.a.	n.a.	n.a.	n.a.	n.a.
Smp_204140	Chr_ZW	24247787	155	Z	Chr_Z	n.a.	n.a.	n.a.	n.a.	n.a.	n.a.	Sha_C10131793	n.a.	Chr_Z	0	0	n.a.	n.a.	n.a.
Smp_204150	Chr_ZW	24336781	755	Z	Chr_Z	n.a.	n.a.	n.a.	n.a.	n.a.	n.a.	n.a.	n.a.	n.a.	n.a.	n.a.	n.a.	n.a.	n.a.
Smp_205330	SC_0288	93516	215	Z	Chr_newZ	n.a.	n.a.	n.a.	n.a.	n.a.	n.a.	n.a.	n.a.	n.a.	n.a.	n.a.	n.a.	n.a.	n.a.
SmtRNA_00004_Gln.1	Chr_ZW	26429763	66	Z	Chr_Z	n.a.	n.a.	n.a.	n.a.	n.a.	n.a.	n.a.	n.a.	n.a.	n.a.	n.a.	n.a.	n.a.	n.a.
SmtRNA_00014_Ser.1	Chr_ZW	19074460	81	Z	Chr_Z	n.a.	n.a.	n.a.	n.a.	n.a.	n.a.	n.a.	n.a.	n.a.	n.a.	n.a.	n.a.	n.a.	n.a.
SmtRNA_00016_Gln.1	Chr_ZW.unplaced.SC_0115	80998	67	Z	Chr_newZ	n.a.	n.a.	n.a.	n.a.	n.a.	n.a.	n.a.	n.a.	n.a.	n.a.	n.a.	n.a.	n.a.	n.a.
SmtRNA_00039_Pseudo_TTG.1.1	Chr_ZW	18809565	66	Z	Chr_Z	n.a.	n.a.	n.a.	n.a.	n.a.	n.a.	n.a.	n.a.	n.a.	n.a.	n.a.	n.a.	n.a.	n.a.
SmtRNA_00071_Pseudo_TTG.1.1	Chr_ZW	29149592	70	Z	Chr_Z	n.a.	n.a.	n.a.	n.a.	n.a.	n.a.	n.a.	n.a.	n.a.	n.a.	n.a.	n.a.	n.a.	n.a.
SmtRNA_00119_Gln_TTG.1.1	Chr_ZW	8998949	66	Z	Chr_Z	n.a.	n.a.	n.a.	n.a.	n.a.	n.a.	n.a.	n.a.	n.a.	n.a.	n.a.	n.a.	n.a.	n.a.
SmtRNA_00127_Pseudo_TTG.1.1	Chr_ZW	18662051	69	Z	Chr_Z	n.a.	n.a.	n.a.	n.a.	n.a.	n.a.	n.a.	n.a.	n.a.	n.a.	n.a.	n.a.	n.a.	n.a.
SmtRNA_00196_Gln_CTG.1.1	Chr_ZW	8057471	66	Z	Chr_Z	n.a.	n.a.	n.a.	n.a.	n.a.	n.a.	n.a.	n.a.	n.a.	n.a.	n.a.	n.a.	n.a.	n.a.
SmtRNA_00204_Gln_TTG.1.1	Chr_ZW	19395335	66	Z	Chr_Z	n.a.	n.a.	n.a.	n.a.	n.a.	n.a.	n.a.	n.a.	n.a.	n.a.	n.a.	n.a.	n.a.	n.a.
SmtRNA_00268_Gln_TTG.1.1	Chr_ZW	8233492	66	Z	Chr_Z	n.a.	n.a.	n.a.	n.a.	n.a.	n.a.	n.a.	n.a.	n.a.	n.a.	n.a.	n.a.	n.a.	n.a.
SmtRNA_00323_Sup_TTA.1.1	Chr_ZW	8239341	66	Z	Chr_Z	n.a.	n.a.	n.a.	n.a.	n.a.	n.a.	n.a.	n.a.	n.a.	n.a.	n.a.	n.a.	n.a.	n.a.
SmtRNA_00367_Gln_TTG.1.1	Chr_ZW	8371649	66	Z	Chr_Z	n.a.	n.a.	n.a.	n.a.	n.a.	n.a.	n.a.	n.a.	n.a.	n.a.	n.a.	n.a.	n.a.	n.a.
SmtRNA_00412_Gln_TTG.1.1	Chr_ZW	15315968	433	Z	Chr_Z	n.a.	n.a.	n.a.	n.a.	n.a.	n.a.	n.a.	n.a.	n.a.	n.a.	n.a.	n.a.	n.a.	n.a.
SmtRNA_00497_Phe_GAA.1.1	Chr_ZW	8722794	71	Z	Chr_Z	n.a.	n.a.	n.a.	n.a.	n.a.	n.a.	n.a.	n.a.	n.a.	n.a.	n.a.	n.a.	n.a.	n.a.
SmtRNA_00501_Pseudo_TTG.1.1	Chr_ZW	19240232	66	Z	Chr_Z	n.a.	n.a.	n.a.	n.a.	n.a.	n.a.	n.a.	n.a.	n.a.	n.a.	n.a.	n.a.	n.a.	n.a.
SmtRNA_00502_Gln_TTG.1.1	Chr_ZW	18593070	65	Z	Chr_Z	n.a.	n.a.	n.a.	n.a.	n.a.	n.a.	n.a.	n.a.	n.a.	n.a.	n.a.	n.a.	n.a.	n.a.
SmtRNA_00534_Gln_TTG.1.1	Chr_ZW.unplaced.SC_0115	348686	65	Z	Chr_newZ	n.a.	n.a.	n.a.	n.a.	n.a.	n.a.	n.a.	n.a.	n.a.	n.a.	n.a.	n.a.	n.a.	n.a.
SmtRNA_00544_Pseudo_ATG.1.1	Chr_ZW	15362087	71	Z	Chr_Z	n.a.	n.a.	n.a.	n.a.	n.a.	n.a.	n.a.	n.a.	n.a.	n.a.	n.a.	n.a.	n.a.	n.a.
SmtRNA_00553_Pseudo_TTG.1.1	Chr_ZW	11657820	70	Z	Chr_Z	n.a.	n.a.	n.a.	n.a.	n.a.	n.a.	n.a.	n.a.	n.a.	n.a.	n.a.	n.a.	n.a.	n.a.
SmtRNA_00615_Pseudo_TTG.1.1	SC_0173	375150	71	Z	Chr_newZ	n.a.	n.a.	n.a.	n.a.	n.a.	n.a.	n.a.	n.a.	n.a.	n.a.	n.a.	n.a.	n.a.	n.a.
SmtRNA_00653_Gln_TTG.1.1	Chr_ZW	10607064	65	Z	Chr_Z	n.a.	n.a.	n.a.	n.a.	n.a.	n.a.	n.a.	n.a.	n.a.	n.a.	n.a.	n.a.	n.a.	n.a.
SmtRNA_00720_Pseudo_CGA.1.1	SC_0196	175301	71	Z	Chr_newZ	n.a.	n.a.	n.a.	n.a.	n.a.	n.a.	n.a.	n.a.	n.a.	n.a.	n.a.	n.a.	n.a.	n.a.
SmtRNA_00725_Pseudo_TTG.1.1	SC_0267	14619	70	Z	Chr_newZ	n.a.	n.a.	n.a.	n.a.	n.a.	n.a.	n.a.	n.a.	n.a.	n.a.	n.a.	n.a.	n.a.	n.a.
SmtRNA_00738_Pseudo_TTG.1.1	Chr_ZW	5612290	70	Z	Chr_Z	n.a.	n.a.	n.a.	n.a.	n.a.	n.a.	n.a.	n.a.	n.a.	n.a.	n.a.	n.a.	n.a.	n.a.
SmtRNA_00747_Gln_TTG.1.1	Chr_ZW	18160212	65	Z	Chr_Z	n.a.	n.a.	n.a.	n.a.	n.a.	n.a.	n.a.	n.a.	n.a.	n.a.	n.a.	n.a.	n.a.	n.a.
SmtRNA_00822_Pseudo_TTG.1.1	Chr_ZW	28909804	425	Z	Chr_Z	n.a.	n.a.	n.a.	n.a.	n.a.	n.a.	n.a.	n.a.	n.a.	n.a.	n.a.	n.a.	n.a.	n.a.
SmtRNA_00851_Pseudo_CGA.1.1	SC_0196	175302	71	Z	Chr_newZ	n.a.	n.a.	n.a.	n.a.	n.a.	n.a.	n.a.	n.a.	n.a.	n.a.	n.a.	n.a.	n.a.	n.a.
SmtRNA_00907_Pseudo_CGA.1.1	Chr_2	32147616	71	Z	Chr_newZ	n.a.	n.a.	n.a.	n.a.	n.a.	n.a.	n.a.	n.a.	n.a.	n.a.	n.a.	n.a.	n.a.	n.a.
SmtRNA_00924_Pseudo_TTG.1.1	Chr_ZW	23387090	66	Z	Chr_Z	n.a.	n.a.	n.a.	n.a.	n.a.	n.a.	n.a.	n.a.	n.a.	n.a.	n.a.	n.a.	n.a.	n.a.
SmtRNA_00969_Pseudo_CGA.1.1	Chr_ZW	15421909	71	Z	Chr_Z	n.a.	n.a.	n.a.	n.a.	n.a.	n.a.	n.a.	n.a.	n.a.	n.a.	n.a.	n.a.	n.a.	n.a.
SmtRNA_00976_Pseudo_TTG.1.1	Chr_ZW	11905757	71	Z	Chr_Z	n.a.	n.a.	n.a.	n.a.	n.a.	n.a.	n.a.	n.a.	n.a.	n.a.	n.a.	n.a.	n.a.	n.a.
SmtRNA_01031_Pseudo_TTG.1.1	SC_0173	429130	66	Z	Chr_newZ	n.a.	n.a.	n.a.	n.a.	n.a.	n.a.	n.a.	n.a.	n.a.	n.a.	n.a.	n.a.	n.a.	n.a.
SmtRNA_01035_Pseudo_CGA.1.1	Chr_ZW	15008628	71	Z	Chr_Z	n.a.	n.a.	n.a.	n.a.	n.a.	n.a.	n.a.	n.a.	n.a.	n.a.	n.a.	n.a.	n.a.	n.a.
SmtRNA_01065_Pseudo_TTA.1.1	Chr_ZW	25051104	65	Z	Chr_Z	n.a.	n.a.	n.a.	n.a.	n.a.	n.a.	n.a.	n.a.	n.a.	n.a.	n.a.	n.a.	n.a.	n.a.
SmtRNA_01106_Pseudo_TTG.1.1	Chr_ZW	26650135	66	Z	Chr_Z	n.a.	n.a.	n.a.	n.a.	n.a.	n.a.	n.a.	n.a.	n.a.	n.a.	n.a.	n.a.	n.a.	n.a.
SmtRNA_01108_Gln_TTG.1.1	Chr_ZW	25819708	66	Z	Chr_Z	n.a.	n.a.	n.a.	n.a.	n.a.	n.a.	n.a.	n.a.	n.a.	n.a.	n.a.	n.a.	n.a.	n.a.
SmtRNA_01126_Pseudo_???.1.1	SC_0196	348769	66	Z	Chr_newZ	n.a.	n.a.	n.a.	n.a.	n.a.	n.a.	n.a.	n.a.	n.a.	n.a.	n.a.	n.a.	n.a.	n.a.
SmtRNA_01133_Gln_TTG.1.1	Chr_ZW	27505483	70	Z	Chr_Z	n.a.	n.a.	n.a.	n.a.	n.a.	n.a.	n.a.	n.a.	n.a.	n.a.	n.a.	n.a.	n.a.	n.a.
SmtRNA_01144_Pseudo_CGA.1.1	Chr_ZW	5213501	71	Z	Chr_Z	n.a.	n.a.	n.a.	n.a.	n.a.	n.a.	n.a.	n.a.	n.a.	n.a.	n.a.	n.a.	n.a.	n.a.
SmtRNA_01266_Pseudo_TTG.1.1	SC_0173	52853	71	Z	Chr_newZ	n.a.	n.a.	n.a.	n.a.	n.a.	n.a.	n.a.	n.a.	n.a.	n.a.	n.a.	n.a.	n.a.	n.a.
SmtRNA_01268_Pseudo_TTG.1.1	Chr_ZW	8024063	70	Z	Chr_Z	n.a.	n.a.	n.a.	n.a.	n.a.	n.a.	n.a.	n.a.	n.a.	n.a.	n.a.	n.a.	n.a.	n.a.
SmtRNA_01308_Pseudo_TTG.1.1	Chr_ZW	4821829	70	Z	Chr_Z	n.a.	n.a.	n.a.	n.a.	n.a.	n.a.	n.a.	n.a.	n.a.	n.a.	n.a.	n.a.	n.a.	n.a.
SmtRNA_01324_Gln_TTG.1.1	Chr_ZW	12046838	65	Z	Chr_Z	n.a.	n.a.	n.a.	n.a.	n.a.	n.a.	n.a.	n.a.	n.a.	n.a.	n.a.	n.a.	n.a.	n.a.
SmtRNA_01406_Pseudo_TTC.1.1	Chr_ZW	10573306	69	Z	Chr_Z	n.a.	n.a.	n.a.	n.a.	n.a.	n.a.	n.a.	n.a.	n.a.	n.a.	n.a.	n.a.	n.a.	n.a.
SmtRNA_01446_Pseudo_???.1.1	Chr_ZW	26525674	69	Z	Chr_Z	n.a.	n.a.	n.a.	n.a.	n.a.	n.a.	n.a.	n.a.	n.a.	n.a.	n.a.	n.a.	n.a.	n.a.
SmtRNA_01464_Gln_TTG.1.1	Chr_ZW	3608409	65	Z	Chr_Z	n.a.	n.a.	n.a.	n.a.	n.a.	n.a.	n.a.	n.a.	n.a.	n.a.	n.a.	n.a.	n.a.	n.a.
SmtRNA_01477_Gln_TTG.1.1	Chr_ZW	5187312	66	Z	Chr_Z	n.a.	n.a.	n.a.	n.a.	n.a.	n.a.	n.a.	n.a.	n.a.	n.a.	n.a.	n.a.	n.a.	n.a.
SmtRNA_01479_Pseudo_TTG.1.1	Chr_ZW	16319417	72	Z	Chr_Z	n.a.	n.a.	n.a.	n.a.	n.a.	n.a.	n.a.	n.a.	n.a.	n.a.	n.a.	n.a.	n.a.	n.a.
SmtRNA_01570_Leu_TAG.1.1	Chr_ZW	6210331	66	Z	Chr_Z	n.a.	n.a.	n.a.	n.a.	n.a.	n.a.	n.a.	n.a.	n.a.	n.a.	n.a.	n.a.	n.a.	n.a.
SmtRNA_01674_Sup_TTA.1.1	Chr_ZW	10798212	65	Z	Chr_Z	n.a.	n.a.	n.a.	n.a.	n.a.	n.a.	n.a.	n.a.	n.a.	n.a.	n.a.	n.a.	n.a.	n.a.
SmtRNA_01770_Gln_TTG.1.1	Chr_ZW	19404801	66	Z	Chr_Z	n.a.	n.a.	n.a.	n.a.	n.a.	n.a.	n.a.	n.a.	n.a.	n.a.	n.a.	n.a.	n.a.	n.a.
SmtRNA_01786_Pseudo_TTA.1.1	Chr_ZW	5939215	71	Z	Chr_Z	n.a.	n.a.	n.a.	n.a.	n.a.	n.a.	n.a.	n.a.	n.a.	n.a.	n.a.	n.a.	n.a.	n.a.
SmtRNA_01787_Gln_TTG.1.1	Chr_ZW	9258937	65	Z	Chr_Z	n.a.	n.a.	n.a.	n.a.	n.a.	n.a.	n.a.	n.a.	n.a.	n.a.	n.a.	n.a.	n.a.	n.a.
SmtRNA_01796_Pseudo_???.1.1	Chr_ZW	4631882	73	Z	Chr_Z	n.a.	n.a.	n.a.	n.a.	n.a.	n.a.	n.a.	n.a.	n.a.	n.a.	n.a.	n.a.	n.a.	n.a.
SmtRNA_01799_Pseudo_TTG.1.1	Chr_3.unplaced.SC_0124	547616	66	Z	Chr_newZ	n.a.	n.a.	n.a.	n.a.	n.a.	n.a.	n.a.	n.a.	n.a.	n.a.	n.a.	n.a.	n.a.	n.a.
SmtRNA_01813_Pseudo_CGA.1.1	Chr_ZW	11883966	71	Z	Chr_Z	n.a.	n.a.	n.a.	n.a.	n.a.	n.a.	n.a.	n.a.	n.a.	n.a.	n.a.	n.a.	n.a.	n.a.
SmtRNA_01834_Gln_TTG.1.1	Chr_ZW	29240504	66	Z	Chr_Z	n.a.	n.a.	n.a.	n.a.	n.a.	n.a.	n.a.	n.a.	n.a.	n.a.	n.a.	n.a.	n.a.	n.a.
SmtRNA_01959_Pseudo_TCG.1.1	Chr_ZW	19189712	71	Z	Chr_Z	n.a.	n.a.	n.a.	n.a.	n.a.	n.a.	n.a.	n.a.	n.a.	n.a.	n.a.	n.a.	n.a.	n.a.
SmtRNA_01974_Leu_TAG.1.1	Chr_2	5331554	66	Z	Chr_newZ	n.a.	n.a.	n.a.	n.a.	n.a.	n.a.	n.a.	n.a.	n.a.	n.a.	n.a.	n.a.	n.a.	n.a.
SmtRNA_01994_Gln_TTG.1.1	Chr_ZW	11656336	65	Z	Chr_Z	n.a.	n.a.	n.a.	n.a.	n.a.	n.a.	n.a.	n.a.	n.a.	n.a.	n.a.	n.a.	n.a.	n.a.
SmtRNA_02124_Pseudo_TTG.1.1	Chr_ZW	5898705	66	Z	Chr_Z	n.a.	n.a.	n.a.	n.a.	n.a.	n.a.	n.a.	n.a.	n.a.	n.a.	n.a.	n.a.	n.a.	n.a.
SmtRNA_02144_Gln_TTG.1.1	Chr_ZW	11587755	65	Z	Chr_Z	n.a.	n.a.	n.a.	n.a.	n.a.	n.a.	n.a.	n.a.	n.a.	n.a.	n.a.	n.a.	n.a.	n.a.
SmtRNA_02163_Gln_TTG.1.1	Chr_ZW	28844373	65	Z	Chr_Z	n.a.	n.a.	n.a.	n.a.	n.a.	n.a.	n.a.	n.a.	n.a.	n.a.	n.a.	n.a.	n.a.	n.a.
SmtRNA_02269_Pseudo_CGA.1.1	Chr_ZW	30783362	71	Z	Chr_Z	n.a.	n.a.	n.a.	n.a.	n.a.	n.a.	n.a.	n.a.	n.a.	n.a.	n.a.	n.a.	n.a.	n.a.
SmtRNA_02348_Gln_TTG.1.1	Chr_ZW	7786727	65	Z	Chr_Z	n.a.	n.a.	n.a.	n.a.	n.a.	n.a.	n.a.	n.a.	n.a.	n.a.	n.a.	n.a.	n.a.	n.a.
SmtRNA_02367_Gln_TTG.1.1	Chr_ZW	10939277	66	Z	Chr_Z	n.a.	n.a.	n.a.	n.a.	n.a.	n.a.	n.a.	n.a.	n.a.	n.a.	n.a.	n.a.	n.a.	n.a.
SmtRNA_02393_Gln_TTG.1.1	Chr_ZW	29120597	65	Z	Chr_Z	n.a.	n.a.	n.a.	n.a.	n.a.	n.a.	n.a.	n.a.	n.a.	n.a.	n.a.	n.a.	n.a.	n.a.
Smp_006960	Chr_3.unplaced.SC_0192	156831	1273	Z	Chr_newZ	n.a.	n.a.	n.a.	n.a.	n.a.	n.a.	Sha_scaffold904	154217	Chr_1	22	7	Autosome	n.a.	n.a.
Smp_028640	Chr_ZW	4766002	6192	Z	Chr_Z	n.a.	n.a.	n.a.	n.a.	n.a.	n.a.	Sha_scaffold1182	47831	Chr_PSA	22	7	Autosome	n.a.	n.a.
Smp_061930	Chr_ZW	29953740	296	Z	Chr_Z	n.a.	n.a.	n.a.	n.a.	n.a.	n.a.	Sha_scaffold650	402093	Chr_PSA	19	6.2	Autosome	n.a.	n.a.
Smp_066420	SC_0136	561780	81732	Z	Chr_newZ	n.a.	n.a.	n.a.	n.a.	n.a.	n.a.	Sha_scaffold1432	403905	Chr_PSA	22	6.9	Autosome	n.a.	n.a.
Smp_083580	Chr_ZW	12699589	625	Z	Chr_Z	n.a.	n.a.	n.a.	n.a.	n.a.	n.a.	Sha_scaffold858	385361	Chr_UP	19	6.1	Autosome	n.a.	n.a.
Smp_086370	SC_0196	274863	305	Z	Chr_newZ	n.a.	n.a.	n.a.	n.a.	n.a.	n.a.	Sha_scaffold1059	415253	Chr_2	25	7.7	Autosome	n.a.	n.a.
Smp_147480	Chr_ZW	29319474	412	Z	Chr_Z	n.a.	n.a.	n.a.	n.a.	n.a.	n.a.	Sha_scaffold1621	421576	Chr_7	21	6.8	Autosome	n.a.	n.a.
Smp_174120	Chr_ZW	27907844	278	Z	Chr_Z	n.a.	n.a.	n.a.	n.a.	n.a.	n.a.	Sha_scaffold744	241227	Chr_5	24	7.6	Autosome	n.a.	n.a.
Smp_201210	Chr_1.unplaced.SC_0034	1941136	218	Z	Chr_newZ	n.a.	n.a.	n.a.	n.a.	n.a.	n.a.	Sha_scaffold2897	64693	Chr_newZ	27	8.4	Autosome	n.a.	n.a.
Smp_204370	Chr_ZW.unplaced.SC_0115	469082	176	Z	Chr_newZ	n.a.	n.a.	n.a.	n.a.	n.a.	n.a.	Sha_scaffold3290	36742	Chr_PSA	23	7	Autosome	n.a.	n.a.
Smp_047320	Chr_ZW	29474056	2064	Z	Chr_Z	n.a.	n.a.	n.a.	n.a.	n.a.	n.a.	Sha_scaffold1006	744907	Chr_Z	16	5.2	Ambiguous	n.a.	n.a.
Smp_147530	Chr_ZW	29502864	284	Z	Chr_Z	n.a.	n.a.	n.a.	n.a.	n.a.	n.a.	Sha_scaffold1006	744907	Chr_Z	16	5.2	Ambiguous	n.a.	n.a.
Smp_154040	SC_0129	733131	3755	Z	Chr_newZ	n.a.	n.a.	n.a.	n.a.	n.a.	n.a.	Sha_scaffold7362	3152	Chr_newZ	16	5.4	Ambiguous	n.a.	n.a.
Smp_169120	SC_0689	7266	743	Not analysed (Scaffold < 40kb)	Chr_UP	n.a.	n.a.	n.a.	n.a.	n.a.	n.a.	Sha_scaffold5249	33470	Chr_UP	12	3.8	Z	n.a.	n.a.
Smp_181730	SC_0550	11397	233	Not analysed (Scaffold < 40kb)	Chr_UP	n.a.	n.a.	n.a.	n.a.	n.a.	n.a.	Sha_C9857731	440	Chr_UP	7	2.4	Z	n.a.	n.a.
Smp_194330	SC_2114	2725	215	Not analysed (Scaffold < 40kb)	Chr_UP	n.a.	n.a.	n.a.	n.a.	n.a.	n.a.	Sha_C9665706	224	Chr_UP	12	4.2	Z	n.a.	n.a.
Smp_199650	SC_0390	8304	119	Not analysed (Scaffold < 40kb)	Chr_UP	n.a.	n.a.	n.a.	n.a.	n.a.	n.a.	Sha_scaffold1217	115473	Chr_UP	14	4.4	Z	n.a.	n.a.
Smp_205900	SC_0810	6208	494	Not analysed (Scaffold < 40kb)	Chr_UP	n.a.	n.a.	n.a.	n.a.	n.a.	n.a.	Sha_scaffold1738	171371	Chr_UP	14	4.4	Z	n.a.	n.a.
Smp_206000	SC_1195	991	212	Not analysed (Scaffold < 40kb)	Chr_UP	n.a.	n.a.	n.a.	n.a.	n.a.	n.a.	Sha_scaffold717	216658	Chr_Z	13	4.1	Z	n.a.	n.a.
Smp_206060	SC_1338	881	377	Not analysed (Scaffold < 40kb)	Chr_UP	n.a.	n.a.	n.a.	n.a.	n.a.	n.a.	Sha_scaffold1738	171371	Chr_UP	14	4.4	Z	n.a.	n.a.
sma.18s-61.1	SC_0368	13100	1020	Not analysed (Scaffold < 40kb)	Chr_UP	n.a.	n.a.	n.a.	n.a.	n.a.	n.a.	n.a.	n.a.	n.a.	n.a.	n.a.	n.a.	n.a.	n.a.
sma.18s-62.1	SC_0368	13098	1969	Not analysed (Scaffold < 40kb)	Chr_UP	n.a.	n.a.	n.a.	n.a.	n.a.	n.a.	n.a.	n.a.	n.a.	n.a.	n.a.	n.a.	n.a.	n.a.
sma.18s-85.1	SC_0368	13100	1986	Not analysed (Scaffold < 40kb)	Chr_UP	n.a.	n.a.	n.a.	n.a.	n.a.	n.a.	n.a.	n.a.	n.a.	n.a.	n.a.	n.a.	n.a.	n.a.
sma.28s-104.1	SC_0402	5522	1692	Not analysed (Scaffold < 40kb)	Chr_UP	n.a.	n.a.	n.a.	n.a.	n.a.	n.a.	n.a.	n.a.	n.a.	n.a.	n.a.	n.a.	n.a.	n.a.
sma.28s-105.1	SC_0402	4237	1690	Not analysed (Scaffold < 40kb)	Chr_UP	n.a.	n.a.	n.a.	n.a.	n.a.	n.a.	n.a.	n.a.	n.a.	n.a.	n.a.	n.a.	n.a.	n.a.
sma.28s-72.1	SC_0368	12345	1692	Not analysed (Scaffold < 40kb)	Chr_UP	n.a.	n.a.	n.a.	n.a.	n.a.	n.a.	n.a.	n.a.	n.a.	n.a.	n.a.	n.a.	n.a.	n.a.
sma.5.8s-122.1	SC_0402	5257	153	Not analysed (Scaffold < 40kb)	Chr_UP	n.a.	n.a.	n.a.	n.a.	n.a.	n.a.	n.a.	n.a.	n.a.	n.a.	n.a.	n.a.	n.a.	n.a.
sma.5.8s-69.1	SC_0368	12468	153	Not analysed (Scaffold < 40kb)	Chr_UP	n.a.	n.a.	n.a.	n.a.	n.a.	n.a.	n.a.	n.a.	n.a.	n.a.	n.a.	n.a.	n.a.	n.a.
sma.5.8s-85.1	SC_0368	12457	162	Not analysed (Scaffold < 40kb)	Chr_UP	n.a.	n.a.	n.a.	n.a.	n.a.	n.a.	n.a.	n.a.	n.a.	n.a.	n.a.	n.a.	n.a.	n.a.
sma.5s-7.1	SC_0387	23470	116	Not analysed (Scaffold < 40kb)	Chr_UP	n.a.	n.a.	n.a.	n.a.	n.a.	n.a.	n.a.	n.a.	n.a.	n.a.	n.a.	n.a.	n.a.	n.a.
sma.5s-8.1	SC_0387	26976	116	Not analysed (Scaffold < 40kb)	Chr_UP	n.a.	n.a.	n.a.	n.a.	n.a.	n.a.	n.a.	n.a.	n.a.	n.a.	n.a.	n.a.	n.a.	n.a.
Smp_028910	SC_0476	10627	321	Not analysed (Scaffold < 40kb)	Chr_UP	n.a.	n.a.	n.a.	n.a.	n.a.	n.a.	n.a.	n.a.	n.a.	n.a.	n.a.	n.a.	n.a.	n.a.
Smp_075000	SC_0657	6222	586	Not analysed (Scaffold < 40kb)	Chr_UP	n.a.	n.a.	n.a.	n.a.	n.a.	n.a.	n.a.	n.a.	n.a.	n.a.	n.a.	n.a.	n.a.	n.a.
Smp_084330	SC_0455	16180	758	Not analysed (Scaffold < 40kb)	Chr_UP	n.a.	n.a.	n.a.	n.a.	n.a.	n.a.	n.a.	n.a.	n.a.	n.a.	n.a.	n.a.	n.a.	n.a.
Smp_091300	SC_0622	4099	596	Not analysed (Scaffold < 40kb)	Chr_UP	n.a.	n.a.	n.a.	n.a.	n.a.	n.a.	n.a.	n.a.	n.a.	n.a.	n.a.	n.a.	n.a.	n.a.
Smp_093470	SC_0643	11235	298	Not analysed (Scaffold < 40kb)	Chr_UP	n.a.	n.a.	n.a.	n.a.	n.a.	n.a.	n.a.	n.a.	n.a.	n.a.	n.a.	n.a.	n.a.	n.a.
Smp_107070	SC_1069	349	224	Not analysed (Scaffold < 40kb)	Chr_UP	n.a.	n.a.	n.a.	n.a.	n.a.	n.a.	n.a.	n.a.	n.a.	n.a.	n.a.	n.a.	n.a.	n.a.
Smp_107330	SC_0478	21264	242	Not analysed (Scaffold < 40kb)	Chr_UP	n.a.	n.a.	n.a.	n.a.	n.a.	n.a.	n.a.	n.a.	n.a.	n.a.	n.a.	n.a.	n.a.	n.a.
Smp_107450	SC_1069	5591	478	Not analysed (Scaffold < 40kb)	Chr_UP	n.a.	n.a.	n.a.	n.a.	n.a.	n.a.	n.a.	n.a.	n.a.	n.a.	n.a.	n.a.	n.a.	n.a.
Smp_107470	SC_1069	4641	242	Not analysed (Scaffold < 40kb)	Chr_UP	n.a.	n.a.	n.a.	n.a.	n.a.	n.a.	n.a.	n.a.	n.a.	n.a.	n.a.	n.a.	n.a.	n.a.
Smp_107640	SC_0478	17329	242	Not analysed (Scaffold < 40kb)	Chr_UP	n.a.	n.a.	n.a.	n.a.	n.a.	n.a.	n.a.	n.a.	n.a.	n.a.	n.a.	n.a.	n.a.	n.a.
Smp_107650	SC_0478	16854	242	Not analysed (Scaffold < 40kb)	Chr_UP	n.a.	n.a.	n.a.	n.a.	n.a.	n.a.	n.a.	n.a.	n.a.	n.a.	n.a.	n.a.	n.a.	n.a.
Smp_108360	SC_1069	1627	1192	Not analysed (Scaffold < 40kb)	Chr_UP	n.a.	n.a.	n.a.	n.a.	n.a.	n.a.	n.a.	n.a.	n.a.	n.a.	n.a.	n.a.	n.a.	n.a.
Smp_108530	SC_0478	14694	71	Not analysed (Scaffold < 40kb)	Chr_UP	n.a.	n.a.	n.a.	n.a.	n.a.	n.a.	n.a.	n.a.	n.a.	n.a.	n.a.	n.a.	n.a.	n.a.
Smp_108730	SC_0478	12971	242	Not analysed (Scaffold < 40kb)	Chr_UP	n.a.	n.a.	n.a.	n.a.	n.a.	n.a.	n.a.	n.a.	n.a.	n.a.	n.a.	n.a.	n.a.	n.a.
Smp_109040	SC_0730	116	392	Not analysed (Scaffold < 40kb)	Chr_UP	n.a.	n.a.	n.a.	n.a.	n.a.	n.a.	n.a.	n.a.	n.a.	n.a.	n.a.	n.a.	n.a.	n.a.
Smp_110790	SC_0478	18656	95	Not analysed (Scaffold < 40kb)	Chr_UP	n.a.	n.a.	n.a.	n.a.	n.a.	n.a.	n.a.	n.a.	n.a.	n.a.	n.a.	n.a.	n.a.	n.a.
Smp_111090	SC_0478	18280	356	Not analysed (Scaffold < 40kb)	Chr_UP	n.a.	n.a.	n.a.	n.a.	n.a.	n.a.	n.a.	n.a.	n.a.	n.a.	n.a.	n.a.	n.a.	n.a.
Smp_111100	SC_0478	10283	242	Not analysed (Scaffold < 40kb)	Chr_UP	n.a.	n.a.	n.a.	n.a.	n.a.	n.a.	n.a.	n.a.	n.a.	n.a.	n.a.	n.a.	n.a.	n.a.
Smp_111890	SC_0419	21916	410	Not analysed (Scaffold < 40kb)	Chr_UP	n.a.	n.a.	n.a.	n.a.	n.a.	n.a.	n.a.	n.a.	n.a.	n.a.	n.a.	n.a.	n.a.	n.a.
Smp_111950	SC_0478	6910	242	Not analysed (Scaffold < 40kb)	Chr_UP	n.a.	n.a.	n.a.	n.a.	n.a.	n.a.	n.a.	n.a.	n.a.	n.a.	n.a.	n.a.	n.a.	n.a.
Smp_111960	SC_0478	6435	242	Not analysed (Scaffold < 40kb)	Chr_UP	n.a.	n.a.	n.a.	n.a.	n.a.	n.a.	n.a.	n.a.	n.a.	n.a.	n.a.	n.a.	n.a.	n.a.
Smp_112120	SC_0478	20313	371	Not analysed (Scaffold < 40kb)	Chr_UP	n.a.	n.a.	n.a.	n.a.	n.a.	n.a.	n.a.	n.a.	n.a.	n.a.	n.a.	n.a.	n.a.	n.a.
Smp_112170	SC_0478	11233	548	Not analysed (Scaffold < 40kb)	Chr_UP	n.a.	n.a.	n.a.	n.a.	n.a.	n.a.	n.a.	n.a.	n.a.	n.a.	n.a.	n.a.	n.a.	n.a.
Smp_112590	SC_0509	11381	3764	Not analysed (Scaffold < 40kb)	Chr_UP	n.a.	n.a.	n.a.	n.a.	n.a.	n.a.	n.a.	n.a.	n.a.	n.a.	n.a.	n.a.	n.a.	n.a.
Smp_112600	SC_0509	8205	849	Not analysed (Scaffold < 40kb)	Chr_UP	n.a.	n.a.	n.a.	n.a.	n.a.	n.a.	n.a.	n.a.	n.a.	n.a.	n.a.	n.a.	n.a.	n.a.
Smp_112610	SC_0509	2371	653	Not analysed (Scaffold < 40kb)	Chr_UP	n.a.	n.a.	n.a.	n.a.	n.a.	n.a.	n.a.	n.a.	n.a.	n.a.	n.a.	n.a.	n.a.	n.a.
Smp_112640	SC_0419	9867	404	Not analysed (Scaffold < 40kb)	Chr_UP	n.a.	n.a.	n.a.	n.a.	n.a.	n.a.	n.a.	n.a.	n.a.	n.a.	n.a.	n.a.	n.a.	n.a.
Smp_113460	SC_0483	7516	3593	Not analysed (Scaffold < 40kb)	Chr_UP	n.a.	n.a.	n.a.	n.a.	n.a.	n.a.	n.a.	n.a.	n.a.	n.a.	n.a.	n.a.	n.a.	n.a.
Smp_114810	SC_0478	5960	242	Not analysed (Scaffold < 40kb)	Chr_UP	n.a.	n.a.	n.a.	n.a.	n.a.	n.a.	n.a.	n.a.	n.a.	n.a.	n.a.	n.a.	n.a.	n.a.
Smp_116920	SC_0478	7839	242	Not analysed (Scaffold < 40kb)	Chr_UP	n.a.	n.a.	n.a.	n.a.	n.a.	n.a.	n.a.	n.a.	n.a.	n.a.	n.a.	n.a.	n.a.	n.a.
Smp_117130	SC_1069	3055	242	Not analysed (Scaffold < 40kb)	Chr_UP	n.a.	n.a.	n.a.	n.a.	n.a.	n.a.	n.a.	n.a.	n.a.	n.a.	n.a.	n.a.	n.a.	n.a.
Smp_117160	SC_1069	677	242	Not analysed (Scaffold < 40kb)	Chr_UP	n.a.	n.a.	n.a.	n.a.	n.a.	n.a.	n.a.	n.a.	n.a.	n.a.	n.a.	n.a.	n.a.	n.a.
Smp_117270	SC_0478	13920	242	Not analysed (Scaffold < 40kb)	Chr_UP	n.a.	n.a.	n.a.	n.a.	n.a.	n.a.	n.a.	n.a.	n.a.	n.a.	n.a.	n.a.	n.a.	n.a.
Smp_117280	SC_0478	14395	242	Not analysed (Scaffold < 40kb)	Chr_UP	n.a.	n.a.	n.a.	n.a.	n.a.	n.a.	n.a.	n.a.	n.a.	n.a.	n.a.	n.a.	n.a.	n.a.
Smp_117520	SC_0478	13409	278	Not analysed (Scaffold < 40kb)	Chr_UP	n.a.	n.a.	n.a.	n.a.	n.a.	n.a.	n.a.	n.a.	n.a.	n.a.	n.a.	n.a.	n.a.	n.a.
Smp_117550	SC_0478	3594	242	Not analysed (Scaffold < 40kb)	Chr_UP	n.a.	n.a.	n.a.	n.a.	n.a.	n.a.	n.a.	n.a.	n.a.	n.a.	n.a.	n.a.	n.a.	n.a.
Smp_118960	SC_1667	3186	875	Not analysed (Scaffold < 40kb)	Chr_UP	n.a.	n.a.	n.a.	n.a.	n.a.	n.a.	n.a.	n.a.	n.a.	n.a.	n.a.	n.a.	n.a.	n.a.
Smp_120390	SC_0379	574	1336	Not analysed (Scaffold < 40kb)	Chr_UP	n.a.	n.a.	n.a.	n.a.	n.a.	n.a.	n.a.	n.a.	n.a.	n.a.	n.a.	n.a.	n.a.	n.a.
Smp_121030	SC_0908	3747	386	Not analysed (Scaffold < 40kb)	Chr_UP	n.a.	n.a.	n.a.	n.a.	n.a.	n.a.	n.a.	n.a.	n.a.	n.a.	n.a.	n.a.	n.a.	n.a.
Smp_121530	SC_0352	35356	53	Not analysed (Scaffold < 40kb)	Chr_UP	n.a.	n.a.	n.a.	n.a.	n.a.	n.a.	n.a.	n.a.	n.a.	n.a.	n.a.	n.a.	n.a.	n.a.
Smp_125000	SC_0660	9487	1184	Not analysed (Scaffold < 40kb)	Chr_UP	n.a.	n.a.	n.a.	n.a.	n.a.	n.a.	n.a.	n.a.	n.a.	n.a.	n.a.	n.a.	n.a.	n.a.
Smp_128100	SC_0548	6297	3984	Not analysed (Scaffold < 40kb)	Chr_UP	n.a.	n.a.	n.a.	n.a.	n.a.	n.a.	n.a.	n.a.	n.a.	n.a.	n.a.	n.a.	n.a.	n.a.
Smp_133290	SC_0560	14033	221	Not analysed (Scaffold < 40kb)	Chr_UP	n.a.	n.a.	n.a.	n.a.	n.a.	n.a.	n.a.	n.a.	n.a.	n.a.	n.a.	n.a.	n.a.	n.a.
Smp_138420.2	SC_1405	1025	3127	Not analysed (Scaffold < 40kb)	Chr_UP	n.a.	n.a.	n.a.	n.a.	n.a.	n.a.	n.a.	n.a.	n.a.	n.a.	n.a.	n.a.	n.a.	n.a.
Smp_154660	SC_0558	1411	350	Not analysed (Scaffold < 40kb)	Chr_UP	n.a.	n.a.	n.a.	n.a.	n.a.	n.a.	n.a.	n.a.	n.a.	n.a.	n.a.	n.a.	n.a.	n.a.
Smp_158260	SC_0710	3308	71	Not analysed (Scaffold < 40kb)	Chr_UP	n.a.	n.a.	n.a.	n.a.	n.a.	n.a.	n.a.	n.a.	n.a.	n.a.	n.a.	n.a.	n.a.	n.a.
Smp_160860.2	SC_1429	140	2382	Not analysed (Scaffold < 40kb)	Chr_UP	n.a.	n.a.	n.a.	n.a.	n.a.	n.a.	n.a.	n.a.	n.a.	n.a.	n.a.	n.a.	n.a.	n.a.
Smp_163390	SC_0534	2900	563	Not analysed (Scaffold < 40kb)	Chr_UP	n.a.	n.a.	n.a.	n.a.	n.a.	n.a.	n.a.	n.a.	n.a.	n.a.	n.a.	n.a.	n.a.	n.a.
Smp_163990	SC_0640	8394	32	Not analysed (Scaffold < 40kb)	Chr_UP	n.a.	n.a.	n.a.	n.a.	n.a.	n.a.	n.a.	n.a.	n.a.	n.a.	n.a.	n.a.	n.a.	n.a.
Smp_165890	SC_0441	7049	20167	Not analysed (Scaffold < 40kb)	Chr_UP	n.a.	n.a.	n.a.	n.a.	n.a.	n.a.	n.a.	n.a.	n.a.	n.a.	n.a.	n.a.	n.a.	n.a.
Smp_166450	SC_0436	18051	83	Not analysed (Scaffold < 40kb)	Chr_UP	n.a.	n.a.	n.a.	n.a.	n.a.	n.a.	n.a.	n.a.	n.a.	n.a.	n.a.	n.a.	n.a.	n.a.
Smp_166460	SC_0352	40647	50	Not analysed (Scaffold < 40kb)	Chr_UP	n.a.	n.a.	n.a.	n.a.	n.a.	n.a.	n.a.	n.a.	n.a.	n.a.	n.a.	n.a.	n.a.	n.a.
Smp_177260	SC_0468	676	2559	Not analysed (Scaffold < 40kb)	Chr_UP	n.a.	n.a.	n.a.	n.a.	n.a.	n.a.	n.a.	n.a.	n.a.	n.a.	n.a.	n.a.	n.a.	n.a.
Smp_179860	SC_0398	27832	2426	Not analysed (Scaffold < 40kb)	Chr_UP	n.a.	n.a.	n.a.	n.a.	n.a.	n.a.	n.a.	n.a.	n.a.	n.a.	n.a.	n.a.	n.a.	n.a.
Smp_181370	SC_0746	2648	5353	Not analysed (Scaffold < 40kb)	Chr_UP	n.a.	n.a.	n.a.	n.a.	n.a.	n.a.	n.a.	n.a.	n.a.	n.a.	n.a.	n.a.	n.a.	n.a.
Smp_181510	SC_0446	8316	14263	Not analysed (Scaffold < 40kb)	Chr_UP	n.a.	n.a.	n.a.	n.a.	n.a.	n.a.	n.a.	n.a.	n.a.	n.a.	n.a.	n.a.	n.a.	n.a.
Smp_181720	SC_0475	55	1183	Not analysed (Scaffold < 40kb)	Chr_UP	n.a.	n.a.	n.a.	n.a.	n.a.	n.a.	n.a.	n.a.	n.a.	n.a.	n.a.	n.a.	n.a.	n.a.
Smp_182030	SC_0419	1147	1071	Not analysed (Scaffold < 40kb)	Chr_UP	n.a.	n.a.	n.a.	n.a.	n.a.	n.a.	n.a.	n.a.	n.a.	n.a.	n.a.	n.a.	n.a.	n.a.
Smp_182090	SC_0430	6675	205	Not analysed (Scaffold < 40kb)	Chr_UP	n.a.	n.a.	n.a.	n.a.	n.a.	n.a.	n.a.	n.a.	n.a.	n.a.	n.a.	n.a.	n.a.	n.a.
Smp_182280	SC_1185	903	299	Not analysed (Scaffold < 40kb)	Chr_UP	n.a.	n.a.	n.a.	n.a.	n.a.	n.a.	n.a.	n.a.	n.a.	n.a.	n.a.	n.a.	n.a.	n.a.
Smp_182360	SC_0485	6901	495	Not analysed (Scaffold < 40kb)	Chr_UP	n.a.	n.a.	n.a.	n.a.	n.a.	n.a.	n.a.	n.a.	n.a.	n.a.	n.a.	n.a.	n.a.	n.a.
Smp_182890	SC_1299	633	282	Not analysed (Scaffold < 40kb)	Chr_UP	n.a.	n.a.	n.a.	n.a.	n.a.	n.a.	n.a.	n.a.	n.a.	n.a.	n.a.	n.a.	n.a.	n.a.
Smp_183020	SC_0703	2556	2850	Not analysed (Scaffold < 40kb)	Chr_UP	n.a.	n.a.	n.a.	n.a.	n.a.	n.a.	n.a.	n.a.	n.a.	n.a.	n.a.	n.a.	n.a.	n.a.
Smp_183180	SC_1154	584	221	Not analysed (Scaffold < 40kb)	Chr_UP	n.a.	n.a.	n.a.	n.a.	n.a.	n.a.	n.a.	n.a.	n.a.	n.a.	n.a.	n.a.	n.a.	n.a.
Smp_183230	SC_1154	5117	299	Not analysed (Scaffold < 40kb)	Chr_UP	n.a.	n.a.	n.a.	n.a.	n.a.	n.a.	n.a.	n.a.	n.a.	n.a.	n.a.	n.a.	n.a.	n.a.
Smp_183240	SC_1154	4165	299	Not analysed (Scaffold < 40kb)	Chr_UP	n.a.	n.a.	n.a.	n.a.	n.a.	n.a.	n.a.	n.a.	n.a.	n.a.	n.a.	n.a.	n.a.	n.a.
Smp_183630	SC_1471	188	305	Not analysed (Scaffold < 40kb)	Chr_UP	n.a.	n.a.	n.a.	n.a.	n.a.	n.a.	n.a.	n.a.	n.a.	n.a.	n.a.	n.a.	n.a.	n.a.
Smp_183840	SC_0730	1102	404	Not analysed (Scaffold < 40kb)	Chr_UP	n.a.	n.a.	n.a.	n.a.	n.a.	n.a.	n.a.	n.a.	n.a.	n.a.	n.a.	n.a.	n.a.	n.a.
Smp_184510	SC_1185	3547	305	Not analysed (Scaffold < 40kb)	Chr_UP	n.a.	n.a.	n.a.	n.a.	n.a.	n.a.	n.a.	n.a.	n.a.	n.a.	n.a.	n.a.	n.a.	n.a.
Smp_184590	SC_0730	1598	410	Not analysed (Scaffold < 40kb)	Chr_UP	n.a.	n.a.	n.a.	n.a.	n.a.	n.a.	n.a.	n.a.	n.a.	n.a.	n.a.	n.a.	n.a.	n.a.
Smp_184620	SC_0478	567	242	Not analysed (Scaffold < 40kb)	Chr_UP	n.a.	n.a.	n.a.	n.a.	n.a.	n.a.	n.a.	n.a.	n.a.	n.a.	n.a.	n.a.	n.a.	n.a.
Smp_184630	SC_0478	15830	242	Not analysed (Scaffold < 40kb)	Chr_UP	n.a.	n.a.	n.a.	n.a.	n.a.	n.a.	n.a.	n.a.	n.a.	n.a.	n.a.	n.a.	n.a.	n.a.
Smp_184640	SC_0478	2953	206	Not analysed (Scaffold < 40kb)	Chr_UP	n.a.	n.a.	n.a.	n.a.	n.a.	n.a.	n.a.	n.a.	n.a.	n.a.	n.a.	n.a.	n.a.	n.a.
Smp_184720	SC_0478	19382	698	Not analysed (Scaffold < 40kb)	Chr_UP	n.a.	n.a.	n.a.	n.a.	n.a.	n.a.	n.a.	n.a.	n.a.	n.a.	n.a.	n.a.	n.a.	n.a.
Smp_184800	SC_0478	18984	221	Not analysed (Scaffold < 40kb)	Chr_UP	n.a.	n.a.	n.a.	n.a.	n.a.	n.a.	n.a.	n.a.	n.a.	n.a.	n.a.	n.a.	n.a.	n.a.
Smp_184870	SC_0730	2100	410	Not analysed (Scaffold < 40kb)	Chr_UP	n.a.	n.a.	n.a.	n.a.	n.a.	n.a.	n.a.	n.a.	n.a.	n.a.	n.a.	n.a.	n.a.	n.a.
Smp_184890	SC_0419	12829	407	Not analysed (Scaffold < 40kb)	Chr_UP	n.a.	n.a.	n.a.	n.a.	n.a.	n.a.	n.a.	n.a.	n.a.	n.a.	n.a.	n.a.	n.a.	n.a.
Smp_185070	SC_0419	12327	410	Not analysed (Scaffold < 40kb)	Chr_UP	n.a.	n.a.	n.a.	n.a.	n.a.	n.a.	n.a.	n.a.	n.a.	n.a.	n.a.	n.a.	n.a.	n.a.
Smp_185300	SC_0853	2897	299	Not analysed (Scaffold < 40kb)	Chr_UP	n.a.	n.a.	n.a.	n.a.	n.a.	n.a.	n.a.	n.a.	n.a.	n.a.	n.a.	n.a.	n.a.	n.a.
Smp_185390	SC_0478	7385	221	Not analysed (Scaffold < 40kb)	Chr_UP	n.a.	n.a.	n.a.	n.a.	n.a.	n.a.	n.a.	n.a.	n.a.	n.a.	n.a.	n.a.	n.a.	n.a.
Smp_185430	SC_0975	2161	273	Not analysed (Scaffold < 40kb)	Chr_UP	n.a.	n.a.	n.a.	n.a.	n.a.	n.a.	n.a.	n.a.	n.a.	n.a.	n.a.	n.a.	n.a.	n.a.
Smp_185450	SC_0554	16186	131	Not analysed (Scaffold < 40kb)	Chr_UP	n.a.	n.a.	n.a.	n.a.	n.a.	n.a.	n.a.	n.a.	n.a.	n.a.	n.a.	n.a.	n.a.	n.a.
Smp_185520	SC_0478	12014	242	Not analysed (Scaffold < 40kb)	Chr_UP	n.a.	n.a.	n.a.	n.a.	n.a.	n.a.	n.a.	n.a.	n.a.	n.a.	n.a.	n.a.	n.a.	n.a.
Smp_185710	SC_0419	9362	413	Not analysed (Scaffold < 40kb)	Chr_UP	n.a.	n.a.	n.a.	n.a.	n.a.	n.a.	n.a.	n.a.	n.a.	n.a.	n.a.	n.a.	n.a.	n.a.
Smp_185770	SC_0509	3485	152	Not analysed (Scaffold < 40kb)	Chr_UP	n.a.	n.a.	n.a.	n.a.	n.a.	n.a.	n.a.	n.a.	n.a.	n.a.	n.a.	n.a.	n.a.	n.a.
Smp_186130	SC_1309	1053	1095	Not analysed (Scaffold < 40kb)	Chr_UP	n.a.	n.a.	n.a.	n.a.	n.a.	n.a.	n.a.	n.a.	n.a.	n.a.	n.a.	n.a.	n.a.	n.a.
Smp_186190	SC_0559	13430	185	Not analysed (Scaffold < 40kb)	Chr_UP	n.a.	n.a.	n.a.	n.a.	n.a.	n.a.	n.a.	n.a.	n.a.	n.a.	n.a.	n.a.	n.a.	n.a.
Smp_186220	SC_0730	5061	248	Not analysed (Scaffold < 40kb)	Chr_UP	n.a.	n.a.	n.a.	n.a.	n.a.	n.a.	n.a.	n.a.	n.a.	n.a.	n.a.	n.a.	n.a.	n.a.
Smp_186350	SC_0853	410	131	Not analysed (Scaffold < 40kb)	Chr_UP	n.a.	n.a.	n.a.	n.a.	n.a.	n.a.	n.a.	n.a.	n.a.	n.a.	n.a.	n.a.	n.a.	n.a.
Smp_186470	SC_0483	17185	1118	Not analysed (Scaffold < 40kb)	Chr_UP	n.a.	n.a.	n.a.	n.a.	n.a.	n.a.	n.a.	n.a.	n.a.	n.a.	n.a.	n.a.	n.a.	n.a.
Smp_186480	SC_0595	1612	496	Not analysed (Scaffold < 40kb)	Chr_UP	n.a.	n.a.	n.a.	n.a.	n.a.	n.a.	n.a.	n.a.	n.a.	n.a.	n.a.	n.a.	n.a.	n.a.
Smp_186490	SC_0595	4671	1682	Not analysed (Scaffold < 40kb)	Chr_UP	n.a.	n.a.	n.a.	n.a.	n.a.	n.a.	n.a.	n.a.	n.a.	n.a.	n.a.	n.a.	n.a.	n.a.
Smp_186500	SC_0595	8486	203	Not analysed (Scaffold < 40kb)	Chr_UP	n.a.	n.a.	n.a.	n.a.	n.a.	n.a.	n.a.	n.a.	n.a.	n.a.	n.a.	n.a.	n.a.	n.a.
Smp_186510	SC_0595	12827	278	Not analysed (Scaffold < 40kb)	Chr_UP	n.a.	n.a.	n.a.	n.a.	n.a.	n.a.	n.a.	n.a.	n.a.	n.a.	n.a.	n.a.	n.a.	n.a.
Smp_186520	SC_0483	2304	286	Not analysed (Scaffold < 40kb)	Chr_UP	n.a.	n.a.	n.a.	n.a.	n.a.	n.a.	n.a.	n.a.	n.a.	n.a.	n.a.	n.a.	n.a.	n.a.
Smp_186530	SC_1277	2311	193	Not analysed (Scaffold < 40kb)	Chr_UP	n.a.	n.a.	n.a.	n.a.	n.a.	n.a.	n.a.	n.a.	n.a.	n.a.	n.a.	n.a.	n.a.	n.a.
Smp_186540	SC_1277	2527	2719	Not analysed (Scaffold < 40kb)	Chr_UP	n.a.	n.a.	n.a.	n.a.	n.a.	n.a.	n.a.	n.a.	n.a.	n.a.	n.a.	n.a.	n.a.	n.a.
Smp_186690	SC_0475	4966	407	Not analysed (Scaffold < 40kb)	Chr_UP	n.a.	n.a.	n.a.	n.a.	n.a.	n.a.	n.a.	n.a.	n.a.	n.a.	n.a.	n.a.	n.a.	n.a.
Smp_187080	SC_0419	6708	413	Not analysed (Scaffold < 40kb)	Chr_UP	n.a.	n.a.	n.a.	n.a.	n.a.	n.a.	n.a.	n.a.	n.a.	n.a.	n.a.	n.a.	n.a.	n.a.
Smp_187960	SC_1352	265	1544	Not analysed (Scaffold < 40kb)	Chr_UP	n.a.	n.a.	n.a.	n.a.	n.a.	n.a.	n.a.	n.a.	n.a.	n.a.	n.a.	n.a.	n.a.	n.a.
Smp_189060	SC_0478	5452	275	Not analysed (Scaffold < 40kb)	Chr_UP	n.a.	n.a.	n.a.	n.a.	n.a.	n.a.	n.a.	n.a.	n.a.	n.a.	n.a.	n.a.	n.a.	n.a.
Smp_190110	SC_1964	804	176	Not analysed (Scaffold < 40kb)	Chr_UP	n.a.	n.a.	n.a.	n.a.	n.a.	n.a.	n.a.	n.a.	n.a.	n.a.	n.a.	n.a.	n.a.	n.a.
Smp_190360	SC_0730	5370	278	Not analysed (Scaffold < 40kb)	Chr_UP	n.a.	n.a.	n.a.	n.a.	n.a.	n.a.	n.a.	n.a.	n.a.	n.a.	n.a.	n.a.	n.a.	n.a.
Smp_191070	SC_1471	2932	158	Not analysed (Scaffold < 40kb)	Chr_UP	n.a.	n.a.	n.a.	n.a.	n.a.	n.a.	n.a.	n.a.	n.a.	n.a.	n.a.	n.a.	n.a.	n.a.
Smp_191080	SC_1471	3154	152	Not analysed (Scaffold < 40kb)	Chr_UP	n.a.	n.a.	n.a.	n.a.	n.a.	n.a.	n.a.	n.a.	n.a.	n.a.	n.a.	n.a.	n.a.	n.a.
Smp_193230	SC_0686	10232	287	Not analysed (Scaffold < 40kb)	Chr_UP	n.a.	n.a.	n.a.	n.a.	n.a.	n.a.	n.a.	n.a.	n.a.	n.a.	n.a.	n.a.	n.a.	n.a.
Smp_193510	SC_0419	27729	401	Not analysed (Scaffold < 40kb)	Chr_UP	n.a.	n.a.	n.a.	n.a.	n.a.	n.a.	n.a.	n.a.	n.a.	n.a.	n.a.	n.a.	n.a.	n.a.
Smp_193520	SC_0730	8997	407	Not analysed (Scaffold < 40kb)	Chr_UP	n.a.	n.a.	n.a.	n.a.	n.a.	n.a.	n.a.	n.a.	n.a.	n.a.	n.a.	n.a.	n.a.	n.a.
Smp_194070.2	SC_1031	4221	95	Not analysed (Scaffold < 40kb)	Chr_UP	n.a.	n.a.	n.a.	n.a.	n.a.	n.a.	n.a.	n.a.	n.a.	n.a.	n.a.	n.a.	n.a.	n.a.
Smp_194210	SC_0908	181	190	Not analysed (Scaffold < 40kb)	Chr_UP	n.a.	n.a.	n.a.	n.a.	n.a.	n.a.	n.a.	n.a.	n.a.	n.a.	n.a.	n.a.	n.a.	n.a.
Smp_199710	SC_0434	517	287	Not analysed (Scaffold < 40kb)	Chr_UP	n.a.	n.a.	n.a.	n.a.	n.a.	n.a.	n.a.	n.a.	n.a.	n.a.	n.a.	n.a.	n.a.	n.a.
Smp_199740	SC_0436	2397	8121	Not analysed (Scaffold < 40kb)	Chr_UP	n.a.	n.a.	n.a.	n.a.	n.a.	n.a.	n.a.	n.a.	n.a.	n.a.	n.a.	n.a.	n.a.	n.a.
Smp_199850	SC_0579	13515	308	Not analysed (Scaffold < 40kb)	Chr_UP	n.a.	n.a.	n.a.	n.a.	n.a.	n.a.	n.a.	n.a.	n.a.	n.a.	n.a.	n.a.	n.a.	n.a.
Smp_199860	SC_0581	231	2149	Not analysed (Scaffold < 40kb)	Chr_UP	n.a.	n.a.	n.a.	n.a.	n.a.	n.a.	n.a.	n.a.	n.a.	n.a.	n.a.	n.a.	n.a.	n.a.
Smp_199910	SC_0686	2318	2135	Not analysed (Scaffold < 40kb)	Chr_UP	n.a.	n.a.	n.a.	n.a.	n.a.	n.a.	n.a.	n.a.	n.a.	n.a.	n.a.	n.a.	n.a.	n.a.
Smp_199920	SC_0740	11817	5	Not analysed (Scaffold < 40kb)	Chr_UP	n.a.	n.a.	n.a.	n.a.	n.a.	n.a.	n.a.	n.a.	n.a.	n.a.	n.a.	n.a.	n.a.	n.a.
Smp_199950	SC_1109	4402	26	Not analysed (Scaffold < 40kb)	Chr_UP	n.a.	n.a.	n.a.	n.a.	n.a.	n.a.	n.a.	n.a.	n.a.	n.a.	n.a.	n.a.	n.a.	n.a.
Smp_205430	SC_0369	5792	10799	Not analysed (Scaffold < 40kb)	Chr_UP	n.a.	n.a.	n.a.	n.a.	n.a.	n.a.	n.a.	n.a.	n.a.	n.a.	n.a.	n.a.	n.a.	n.a.
Smp_205450	SC_0387	4863	581	Not analysed (Scaffold < 40kb)	Chr_UP	n.a.	n.a.	n.a.	n.a.	n.a.	n.a.	n.a.	n.a.	n.a.	n.a.	n.a.	n.a.	n.a.	n.a.
Smp_205460	SC_0387	6037	1665	Not analysed (Scaffold < 40kb)	Chr_UP	n.a.	n.a.	n.a.	n.a.	n.a.	n.a.	n.a.	n.a.	n.a.	n.a.	n.a.	n.a.	n.a.	n.a.
Smp_205480	SC_0387	29327	518	Not analysed (Scaffold < 40kb)	Chr_UP	n.a.	n.a.	n.a.	n.a.	n.a.	n.a.	n.a.	n.a.	n.a.	n.a.	n.a.	n.a.	n.a.	n.a.
Smp_205500	SC_0395	8998	188	Not analysed (Scaffold < 40kb)	Chr_UP	n.a.	n.a.	n.a.	n.a.	n.a.	n.a.	n.a.	n.a.	n.a.	n.a.	n.a.	n.a.	n.a.	n.a.
Smp_205520	SC_0402	7855	233	Not analysed (Scaffold < 40kb)	Chr_UP	n.a.	n.a.	n.a.	n.a.	n.a.	n.a.	n.a.	n.a.	n.a.	n.a.	n.a.	n.a.	n.a.	n.a.
Smp_205540	SC_0404	1306	872	Not analysed (Scaffold < 40kb)	Chr_UP	n.a.	n.a.	n.a.	n.a.	n.a.	n.a.	n.a.	n.a.	n.a.	n.a.	n.a.	n.a.	n.a.	n.a.
Smp_205560	SC_0420	12550	416	Not analysed (Scaffold < 40kb)	Chr_UP	n.a.	n.a.	n.a.	n.a.	n.a.	n.a.	n.a.	n.a.	n.a.	n.a.	n.a.	n.a.	n.a.	n.a.
Smp_205590	SC_0446	5669	152	Not analysed (Scaffold < 40kb)	Chr_UP	n.a.	n.a.	n.a.	n.a.	n.a.	n.a.	n.a.	n.a.	n.a.	n.a.	n.a.	n.a.	n.a.	n.a.
Smp_205630	SC_0470	4196	887	Not analysed (Scaffold < 40kb)	Chr_UP	n.a.	n.a.	n.a.	n.a.	n.a.	n.a.	n.a.	n.a.	n.a.	n.a.	n.a.	n.a.	n.a.	n.a.
Smp_205640	SC_0476	7840	305	Not analysed (Scaffold < 40kb)	Chr_UP	n.a.	n.a.	n.a.	n.a.	n.a.	n.a.	n.a.	n.a.	n.a.	n.a.	n.a.	n.a.	n.a.	n.a.
Smp_205680	SC_0534	9868	185	Not analysed (Scaffold < 40kb)	Chr_UP	n.a.	n.a.	n.a.	n.a.	n.a.	n.a.	n.a.	n.a.	n.a.	n.a.	n.a.	n.a.	n.a.	n.a.
Smp_205710	SC_0547	7480	1591	Not analysed (Scaffold < 40kb)	Chr_UP	n.a.	n.a.	n.a.	n.a.	n.a.	n.a.	n.a.	n.a.	n.a.	n.a.	n.a.	n.a.	n.a.	n.a.
Smp_205750	SC_0586	6630	3931	Not analysed (Scaffold < 40kb)	Chr_UP	n.a.	n.a.	n.a.	n.a.	n.a.	n.a.	n.a.	n.a.	n.a.	n.a.	n.a.	n.a.	n.a.	n.a.
Smp_205780	SC_0641	7502	152	Not analysed (Scaffold < 40kb)	Chr_UP	n.a.	n.a.	n.a.	n.a.	n.a.	n.a.	n.a.	n.a.	n.a.	n.a.	n.a.	n.a.	n.a.	n.a.
Smp_205790	SC_0660	8048	215	Not analysed (Scaffold < 40kb)	Chr_UP	n.a.	n.a.	n.a.	n.a.	n.a.	n.a.	n.a.	n.a.	n.a.	n.a.	n.a.	n.a.	n.a.	n.a.
Smp_205840	SC_0695	9108	296	Not analysed (Scaffold < 40kb)	Chr_UP	n.a.	n.a.	n.a.	n.a.	n.a.	n.a.	n.a.	n.a.	n.a.	n.a.	n.a.	n.a.	n.a.	n.a.
Smp_205860	SC_0743	496	203	Not analysed (Scaffold < 40kb)	Chr_UP	n.a.	n.a.	n.a.	n.a.	n.a.	n.a.	n.a.	n.a.	n.a.	n.a.	n.a.	n.a.	n.a.	n.a.
Smp_205870	SC_0743	6345	203	Not analysed (Scaffold < 40kb)	Chr_UP	n.a.	n.a.	n.a.	n.a.	n.a.	n.a.	n.a.	n.a.	n.a.	n.a.	n.a.	n.a.	n.a.	n.a.
Smp_205940	SC_0942	753	2350	Not analysed (Scaffold < 40kb)	Chr_UP	n.a.	n.a.	n.a.	n.a.	n.a.	n.a.	n.a.	n.a.	n.a.	n.a.	n.a.	n.a.	n.a.	n.a.
Smp_205950	SC_0975	5733	323	Not analysed (Scaffold < 40kb)	Chr_UP	n.a.	n.a.	n.a.	n.a.	n.a.	n.a.	n.a.	n.a.	n.a.	n.a.	n.a.	n.a.	n.a.	n.a.
Smp_205980	SC_1068	1575	179	Not analysed (Scaffold < 40kb)	Chr_UP	n.a.	n.a.	n.a.	n.a.	n.a.	n.a.	n.a.	n.a.	n.a.	n.a.	n.a.	n.a.	n.a.	n.a.
Smp_205990	SC_1145	571	4968	Not analysed (Scaffold < 40kb)	Chr_UP	n.a.	n.a.	n.a.	n.a.	n.a.	n.a.	n.a.	n.a.	n.a.	n.a.	n.a.	n.a.	n.a.	n.a.
Smp_206020	SC_1225	1191	149	Not analysed (Scaffold < 40kb)	Chr_UP	n.a.	n.a.	n.a.	n.a.	n.a.	n.a.	n.a.	n.a.	n.a.	n.a.	n.a.	n.a.	n.a.	n.a.
Smp_206040	SC_1281	506	2790	Not analysed (Scaffold < 40kb)	Chr_UP	n.a.	n.a.	n.a.	n.a.	n.a.	n.a.	n.a.	n.a.	n.a.	n.a.	n.a.	n.a.	n.a.	n.a.
Smp_206090	SC_1373	998	203	Not analysed (Scaffold < 40kb)	Chr_UP	n.a.	n.a.	n.a.	n.a.	n.a.	n.a.	n.a.	n.a.	n.a.	n.a.	n.a.	n.a.	n.a.	n.a.
Smp_206100	SC_1373	2363	158	Not analysed (Scaffold < 40kb)	Chr_UP	n.a.	n.a.	n.a.	n.a.	n.a.	n.a.	n.a.	n.a.	n.a.	n.a.	n.a.	n.a.	n.a.	n.a.
Smp_206110	SC_1373	4057	203	Not analysed (Scaffold < 40kb)	Chr_UP	n.a.	n.a.	n.a.	n.a.	n.a.	n.a.	n.a.	n.a.	n.a.	n.a.	n.a.	n.a.	n.a.	n.a.
Smp_206150	SC_1469	4270	326	Not analysed (Scaffold < 40kb)	Chr_UP	n.a.	n.a.	n.a.	n.a.	n.a.	n.a.	n.a.	n.a.	n.a.	n.a.	n.a.	n.a.	n.a.	n.a.
Smp_206180	SC_1569	3211	161	Not analysed (Scaffold < 40kb)	Chr_UP	n.a.	n.a.	n.a.	n.a.	n.a.	n.a.	n.a.	n.a.	n.a.	n.a.	n.a.	n.a.	n.a.	n.a.
Smp_206210	SC_1651	1923	158	Not analysed (Scaffold < 40kb)	Chr_UP	n.a.	n.a.	n.a.	n.a.	n.a.	n.a.	n.a.	n.a.	n.a.	n.a.	n.a.	n.a.	n.a.	n.a.
Smp_206220	SC_1681	251	209	Not analysed (Scaffold < 40kb)	Chr_UP	n.a.	n.a.	n.a.	n.a.	n.a.	n.a.	n.a.	n.a.	n.a.	n.a.	n.a.	n.a.	n.a.	n.a.
Smp_206230	SC_1882	443	230	Not analysed (Scaffold < 40kb)	Chr_UP	n.a.	n.a.	n.a.	n.a.	n.a.	n.a.	n.a.	n.a.	n.a.	n.a.	n.a.	n.a.	n.a.	n.a.
Smp_206240	SC_1882	3659	230	Not analysed (Scaffold < 40kb)	Chr_UP	n.a.	n.a.	n.a.	n.a.	n.a.	n.a.	n.a.	n.a.	n.a.	n.a.	n.a.	n.a.	n.a.	n.a.
Smp_206250	SC_1929	2194	1088	Not analysed (Scaffold < 40kb)	Chr_UP	n.a.	n.a.	n.a.	n.a.	n.a.	n.a.	n.a.	n.a.	n.a.	n.a.	n.a.	n.a.	n.a.	n.a.
Smp_206260	SC_1938	1533	338	Not analysed (Scaffold < 40kb)	Chr_UP	n.a.	n.a.	n.a.	n.a.	n.a.	n.a.	n.a.	n.a.	n.a.	n.a.	n.a.	n.a.	n.a.	n.a.
Smp_206300	SC_2440	906	218	Not analysed (Scaffold < 40kb)	Chr_UP	n.a.	n.a.	n.a.	n.a.	n.a.	n.a.	n.a.	n.a.	n.a.	n.a.	n.a.	n.a.	n.a.	n.a.
Smp_212510	SC_0449	21681	2505	Not analysed (Scaffold < 40kb)	Chr_UP	n.a.	n.a.	n.a.	n.a.	n.a.	n.a.	n.a.	n.a.	n.a.	n.a.	n.a.	n.a.	n.a.	n.a.
SmtRNA_00008_Gln.1	SC_0579	10958	67	Not analysed (Scaffold < 40kb)	Chr_UP	n.a.	n.a.	n.a.	n.a.	n.a.	n.a.	n.a.	n.a.	n.a.	n.a.	n.a.	n.a.	n.a.	n.a.
SmtRNA_00015_Gln.1	SC_1569	141	67	Not analysed (Scaffold < 40kb)	Chr_UP	n.a.	n.a.	n.a.	n.a.	n.a.	n.a.	n.a.	n.a.	n.a.	n.a.	n.a.	n.a.	n.a.	n.a.
SmtRNA_00036_Gln_TTG.1.1	SC_0442	20156	66	Not analysed (Scaffold < 40kb)	Chr_UP	n.a.	n.a.	n.a.	n.a.	n.a.	n.a.	n.a.	n.a.	n.a.	n.a.	n.a.	n.a.	n.a.	n.a.
SmtRNA_00721_Pseudo_TTG.1.1	SC_0664	11243	71	Not analysed (Scaffold < 40kb)	Chr_UP	n.a.	n.a.	n.a.	n.a.	n.a.	n.a.	n.a.	n.a.	n.a.	n.a.	n.a.	n.a.	n.a.	n.a.
SmtRNA_00757_Pseudo_TTG.1.1	SC_0549	10010	74	Not analysed (Scaffold < 40kb)	Chr_UP	n.a.	n.a.	n.a.	n.a.	n.a.	n.a.	n.a.	n.a.	n.a.	n.a.	n.a.	n.a.	n.a.	n.a.
SmtRNA_00876_Pseudo_TGA.1.1	SC_0400	664	71	Not analysed (Scaffold < 40kb)	Chr_UP	n.a.	n.a.	n.a.	n.a.	n.a.	n.a.	n.a.	n.a.	n.a.	n.a.	n.a.	n.a.	n.a.	n.a.
SmtRNA_01109_Gln_TTG.1.1	SC_0441	13415	66	Not analysed (Scaffold < 40kb)	Chr_UP	n.a.	n.a.	n.a.	n.a.	n.a.	n.a.	n.a.	n.a.	n.a.	n.a.	n.a.	n.a.	n.a.	n.a.
SmtRNA_01152_Pseudo_???.1.1	SC_0565	4347	72	Not analysed (Scaffold < 40kb)	Chr_UP	n.a.	n.a.	n.a.	n.a.	n.a.	n.a.	n.a.	n.a.	n.a.	n.a.	n.a.	n.a.	n.a.	n.a.
SmtRNA_01213_Trp_CCA.1.1	SC_1333	4291	70	Not analysed (Scaffold < 40kb)	Chr_UP	n.a.	n.a.	n.a.	n.a.	n.a.	n.a.	n.a.	n.a.	n.a.	n.a.	n.a.	n.a.	n.a.	n.a.
SmtRNA_01277_Pseudo_TTG.1.1	SC_0389	24391	70	Not analysed (Scaffold < 40kb)	Chr_UP	n.a.	n.a.	n.a.	n.a.	n.a.	n.a.	n.a.	n.a.	n.a.	n.a.	n.a.	n.a.	n.a.	n.a.
SmtRNA_01546_Sup_TTA.1.1	SC_0442	18826	66	Not analysed (Scaffold < 40kb)	Chr_UP	n.a.	n.a.	n.a.	n.a.	n.a.	n.a.	n.a.	n.a.	n.a.	n.a.	n.a.	n.a.	n.a.	n.a.
SmtRNA_01622_Gln_TTG.1.1	SC_0977	2426	65	Not analysed (Scaffold < 40kb)	Chr_UP	n.a.	n.a.	n.a.	n.a.	n.a.	n.a.	n.a.	n.a.	n.a.	n.a.	n.a.	n.a.	n.a.	n.a.
SmtRNA_01837_Gln_TTG.1.1	SC_0977	2759	65	Not analysed (Scaffold < 40kb)	Chr_UP	n.a.	n.a.	n.a.	n.a.	n.a.	n.a.	n.a.	n.a.	n.a.	n.a.	n.a.	n.a.	n.a.	n.a.
SmtRNA_01918_Gln_TTG.1.1	SC_0357	37	65	Not analysed (Scaffold < 40kb)	Chr_UP	n.a.	n.a.	n.a.	n.a.	n.a.	n.a.	n.a.	n.a.	n.a.	n.a.	n.a.	n.a.	n.a.	n.a.
SmtRNA_01938_Pseudo_TTG.1.1	SC_0413	13769	70	Not analysed (Scaffold < 40kb)	Chr_UP	n.a.	n.a.	n.a.	n.a.	n.a.	n.a.	n.a.	n.a.	n.a.	n.a.	n.a.	n.a.	n.a.	n.a.
SmtRNA_01973_Gln_TTG.1.1	SC_0977	1157	65	Not analysed (Scaffold < 40kb)	Chr_UP	n.a.	n.a.	n.a.	n.a.	n.a.	n.a.	n.a.	n.a.	n.a.	n.a.	n.a.	n.a.	n.a.	n.a.
SmtRNA_02121_Gln_TTG.1.1	SC_0977	1490	65	Not analysed (Scaffold < 40kb)	Chr_UP	n.a.	n.a.	n.a.	n.a.	n.a.	n.a.	n.a.	n.a.	n.a.	n.a.	n.a.	n.a.	n.a.	n.a.
Smp_100310	SC_0468	5257	6995	Not analysed (Scaffold < 40kb)	Chr_UP	n.a.	n.a.	n.a.	n.a.	n.a.	n.a.	Sha_scaffold761	446444	Chr_3	26	8	Autosome	n.a.	n.a.
Smp_110400	SC_0828	3019	2997	Not analysed (Scaffold < 40kb)	Chr_UP	n.a.	n.a.	n.a.	n.a.	n.a.	n.a.	Sha_C9717602	261	Chr_UP	820	270	Autosome	n.a.	n.a.
Smp_114130	SC_0468	13570	439	Not analysed (Scaffold < 40kb)	Chr_UP	n.a.	n.a.	n.a.	n.a.	n.a.	n.a.	Sha_scaffold13	943893	Chr_4	27	8.3	Autosome	n.a.	n.a.
Smp_114220	SC_0461	10060	2728	Not analysed (Scaffold < 40kb)	Chr_UP	n.a.	n.a.	n.a.	n.a.	n.a.	n.a.	Sha_scaffold459	511848	Chr_1	26	7.9	Autosome	n.a.	n.a.
Smp_114510	SC_0420	11386	197	Not analysed (Scaffold < 40kb)	Chr_UP	n.a.	n.a.	n.a.	n.a.	n.a.	n.a.	Sha_scaffold4415	8297	Chr_UP	85	33	Autosome	n.a.	n.a.
Smp_118780	SC_0559	1932	947	Not analysed (Scaffold < 40kb)	Chr_UP	n.a.	n.a.	n.a.	n.a.	n.a.	n.a.	Sha_scaffold1060	131158	Chr_UP	19	6.3	Autosome	n.a.	n.a.
Smp_129930	SC_0719	1298	10085	Not analysed (Scaffold < 40kb)	Chr_UP	n.a.	n.a.	n.a.	n.a.	n.a.	n.a.	Sha_scaffold1211	118184	Chr_1	27	8.2	Autosome	n.a.	n.a.
Smp_137250	SC_0384	8320	19739	Not analysed (Scaffold < 40kb)	Chr_UP	n.a.	n.a.	n.a.	n.a.	n.a.	n.a.	Sha_C9498434	158	Chr_UP	25	12	Autosome	n.a.	n.a.
Smp_150260	SC_0377	25318	7162	Not analysed (Scaffold < 40kb)	Chr_UP	n.a.	n.a.	n.a.	n.a.	n.a.	n.a.	Sha_scaffold273	565638	Chr_UP	21	6.6	Autosome	n.a.	n.a.
Smp_170000	SC_0424	13788	755	Not analysed (Scaffold < 40kb)	Chr_UP	n.a.	n.a.	n.a.	n.a.	n.a.	n.a.	Sha_scaffold1621	421576	Chr_7	21	6.8	Autosome	n.a.	n.a.
Smp_170820	SC_0357	5604	24511	Not analysed (Scaffold < 40kb)	Chr_UP	n.a.	n.a.	n.a.	n.a.	n.a.	n.a.	Sha_scaffold2260	67623	Chr_UP	22	6.7	Autosome	n.a.	n.a.
Smp_171700	SC_0542	9132	158	Not analysed (Scaffold < 40kb)	Chr_UP	n.a.	n.a.	n.a.	n.a.	n.a.	n.a.	Sha_scaffold328	418517	Chr_PSA	23	7.4	Autosome	n.a.	n.a.
Smp_172020	SC_0622	24	161	Not analysed (Scaffold < 40kb)	Chr_UP	n.a.	n.a.	n.a.	n.a.	n.a.	n.a.	Sha_scaffold690	134355	Chr_UP	25	7.8	Autosome	n.a.	n.a.
Smp_175240	SC_0662	11081	3385	Not analysed (Scaffold < 40kb)	Chr_UP	n.a.	n.a.	n.a.	n.a.	n.a.	n.a.	Sha_scaffold861	251152	Chr_UP	25	7.8	Autosome	n.a.	n.a.
Smp_178380	SC_0436	23875	107	Not analysed (Scaffold < 40kb)	Chr_UP	n.a.	n.a.	n.a.	n.a.	n.a.	n.a.	Sha_scaffold1728	93314	Chr_UP	46	15	Autosome	n.a.	n.a.
Smp_178620	SC_0550	7969	619	Not analysed (Scaffold < 40kb)	Chr_UP	n.a.	n.a.	n.a.	n.a.	n.a.	n.a.	Sha_scaffold7356	1770	Chr_UP	52	21	Autosome	n.a.	n.a.
Smp_178630	SC_0550	7468	163	Not analysed (Scaffold < 40kb)	Chr_UP	n.a.	n.a.	n.a.	n.a.	n.a.	n.a.	Sha_scaffold7356	1770	Chr_UP	52	21	Autosome	n.a.	n.a.
Smp_184710	SC_0466	3506	542	Not analysed (Scaffold < 40kb)	Chr_UP	SJC_S018730	1109	Chr_UP	1	0	n.a.	Sha_scaffold325	768499	Chr_1	22	7	Autosome	n.a.	n.a.
Smp_185460	SC_0554	15274	167	Not analysed (Scaffold < 40kb)	Chr_UP	n.a.	n.a.	n.a.	n.a.	n.a.	n.a.	Sha_C9143882	106	Chr_UP	280	87	Autosome	n.a.	n.a.
Smp_186230	SC_1173	606	3251	Not analysed (Scaffold < 40kb)	Chr_UP	n.a.	n.a.	n.a.	n.a.	n.a.	n.a.	Sha_C9941279	624	Chr_UP	750	260	Autosome	n.a.	n.a.
Smp_187430	SC_2011	202	158	Not analysed (Scaffold < 40kb)	Chr_UP	n.a.	n.a.	n.a.	n.a.	n.a.	n.a.	Sha_scaffold628	349458	Chr_UP	22	6.9	Autosome	n.a.	n.a.
Smp_190940	SC_0373	9249	248	Not analysed (Scaffold < 40kb)	Chr_UP	n.a.	n.a.	n.a.	n.a.	n.a.	n.a.	Sha_scaffold1077	263651	Chr_UP	26	7.7	Autosome	n.a.	n.a.
Smp_199670	SC_0393	29448	551	Not analysed (Scaffold < 40kb)	Chr_UP	n.a.	n.a.	n.a.	n.a.	n.a.	n.a.	Sha_scaffold1082	215535	Chr_2	23	7.1	Autosome	n.a.	n.a.
Smp_199750	SC_0443	539	3085	Not analysed (Scaffold < 40kb)	Chr_UP	n.a.	n.a.	n.a.	n.a.	n.a.	n.a.	Sha_scaffold296	723424	Chr_UP	25	7.7	Autosome	n.a.	n.a.
Smp_199890	SC_0670	2249	1408	Not analysed (Scaffold < 40kb)	Chr_UP	n.a.	n.a.	n.a.	n.a.	n.a.	n.a.	Sha_scaffold1159	302472	Chr_6	22	7.2	Autosome	n.a.	n.a.
Smp_205510	SC_0402	4755	248	Not analysed (Scaffold < 40kb)	Chr_UP	SJC_S004095	24122	Chr_UP	0	0	n.a.	Sha_scaffold156	653045	Chr_UP	24	7.4	Autosome	n.a.	n.a.
Smp_205550	SC_0420	8179	770	Not analysed (Scaffold < 40kb)	Chr_UP	n.a.	n.a.	n.a.	n.a.	n.a.	n.a.	Sha_scaffold7227	1587	Chr_UP	43	14	Autosome	n.a.	n.a.
Smp_205610	SC_0463	5866	221	Not analysed (Scaffold < 40kb)	Chr_UP	n.a.	n.a.	n.a.	n.a.	n.a.	n.a.	Sha_scaffold586	686263	Chr_6	25	7.8	Autosome	n.a.	n.a.
Smp_205620	SC_0467	12902	350	Not analysed (Scaffold < 40kb)	Chr_UP	n.a.	n.a.	n.a.	n.a.	n.a.	n.a.	Sha_scaffold111	850837	Chr_UP	21	6.7	Autosome	n.a.	n.a.
Smp_205650	SC_0488	2282	636	Not analysed (Scaffold < 40kb)	Chr_UP	n.a.	n.a.	n.a.	n.a.	n.a.	n.a.	Sha_scaffold119	567300	Chr_6	20	6.5	Autosome	n.a.	n.a.
Smp_205660	SC_0501	7965	629	Not analysed (Scaffold < 40kb)	Chr_UP	n.a.	n.a.	n.a.	n.a.	n.a.	n.a.	Sha_scaffold201	306738	Chr_2	23	7.2	Autosome	n.a.	n.a.
Smp_205670	SC_0502	13229	182	Not analysed (Scaffold < 40kb)	Chr_UP	n.a.	n.a.	n.a.	n.a.	n.a.	n.a.	Sha_C9642404	211	Chr_UP	420	140	Autosome	n.a.	n.a.
Smp_205690	SC_0547	213	920	Not analysed (Scaffold < 40kb)	Chr_UP	n.a.	n.a.	n.a.	n.a.	n.a.	n.a.	Sha_scaffold887	94324	Chr_2	20	6.3	Autosome	n.a.	n.a.
Smp_205740	SC_0579	8214	233	Not analysed (Scaffold < 40kb)	Chr_UP	n.a.	n.a.	n.a.	n.a.	n.a.	n.a.	Sha_scaffold582	219704	Chr_UP	26	8.5	Autosome	n.a.	n.a.
Smp_205800	SC_0662	961	354	Not analysed (Scaffold < 40kb)	Chr_UP	n.a.	n.a.	n.a.	n.a.	n.a.	n.a.	Sha_scaffold861	251152	Chr_UP	25	7.8	Autosome	n.a.	n.a.
Smp_205830	SC_0679	4515	173	Not analysed (Scaffold < 40kb)	Chr_UP	n.a.	n.a.	n.a.	n.a.	n.a.	n.a.	Sha_scaffold1185	206412	Chr_3	26	8.2	Autosome	n.a.	n.a.
Smp_205970	SC_0995	4577	179	Not analysed (Scaffold < 40kb)	Chr_UP	n.a.	n.a.	n.a.	n.a.	n.a.	n.a.	Sha_scaffold146	388369	Chr_PSA	26	8	Autosome	n.a.	n.a.
Smp_206140	SC_1432	4004	242	Not analysed (Scaffold < 40kb)	Chr_UP	n.a.	n.a.	n.a.	n.a.	n.a.	n.a.	Sha_scaffold29	282958	Chr_4	18	6.1	Autosome	n.a.	n.a.
Smp_206190	SC_1586	2717	200	Not analysed (Scaffold < 40kb)	Chr_UP	n.a.	n.a.	n.a.	n.a.	n.a.	n.a.	Sha_scaffold1595	73945	Chr_2	25	7.9	Autosome	n.a.	n.a.
Smp_206200	SC_1611	3590	203	Not analysed (Scaffold < 40kb)	Chr_UP	n.a.	n.a.	n.a.	n.a.	n.a.	n.a.	Sha_scaffold1874	31318	Chr_UP	44	15	Autosome	n.a.	n.a.
Smp_210000	SC_0621	3638	4246	Not analysed (Scaffold < 40kb)	Chr_UP	n.a.	n.a.	n.a.	n.a.	n.a.	n.a.	Sha_scaffold690	134355	Chr_UP	25	7.8	Autosome	n.a.	n.a.
Smp_056680	SC_1734	3400	227	Not analysed (Scaffold < 40kb)	Chr_UP	n.a.	n.a.	n.a.	n.a.	n.a.	n.a.	Sha_scaffold832	103510	Chr_UP	18	5.8	Ambiguous	n.a.	n.a.
Smp_199790	SC_0476	19466	1473	Not analysed (Scaffold < 40kb)	Chr_UP	n.a.	n.a.	n.a.	n.a.	n.a.	n.a.	Sha_scaffold309	92460	Chr_UP	16	6.7	Ambiguous	n.a.	n.a.
Smp_205600	SC_0452	12481	770	Not analysed (Scaffold < 40kb)	Chr_UP	n.a.	n.a.	n.a.	n.a.	n.a.	n.a.	Sha_scaffold681	16931	Chr_UP	16	5.5	Ambiguous	n.a.	n.a.
Smp_179340	Chr_5	4865134	71	Exluded	Chr_UP	n.a.	n.a.	n.a.	n.a.	n.a.	n.a.	Sha_scaffold4969	4977	Chr_UP	14	4.3	Z	n.a.	n.a.
Smp_092740	Chr_5	1112141	10058	Exluded	Chr_UP	n.a.	n.a.	n.a.	n.a.	n.a.	n.a.	n.a.	n.a.	n.a.	n.a.	n.a.	n.a.	n.a.	n.a.
Smp_145710	Chr_5	4859287	1440	Exluded	Chr_UP	n.a.	n.a.	n.a.	n.a.	n.a.	n.a.	n.a.	n.a.	n.a.	n.a.	n.a.	n.a.	n.a.	n.a.
Smp_153370	Chr_5	2394139	6809	Exluded	Chr_UP	n.a.	n.a.	n.a.	n.a.	n.a.	n.a.	n.a.	n.a.	n.a.	n.a.	n.a.	n.a.	n.a.	n.a.
SmtRNA_00565_Arg_ACG.1.1	Chr_5	7007269	71	Exluded	Chr_UP	n.a.	n.a.	n.a.	n.a.	n.a.	n.a.	n.a.	n.a.	n.a.	n.a.	n.a.	n.a.	n.a.	n.a.
SmtRNA_00800_Arg_ACG.1.1	Chr_5	6990770	71	Exluded	Chr_UP	n.a.	n.a.	n.a.	n.a.	n.a.	n.a.	n.a.	n.a.	n.a.	n.a.	n.a.	n.a.	n.a.	n.a.
SmtRNA_00808_Asn_GTT.1.1	Chr_5	3413316	72	Exluded	Chr_UP	n.a.	n.a.	n.a.	n.a.	n.a.	n.a.	n.a.	n.a.	n.a.	n.a.	n.a.	n.a.	n.a.	n.a.
SmtRNA_00815_Asn_GTT.1.1	Chr_5	3412042	72	Exluded	Chr_UP	n.a.	n.a.	n.a.	n.a.	n.a.	n.a.	n.a.	n.a.	n.a.	n.a.	n.a.	n.a.	n.a.	n.a.
SmtRNA_00819_Arg_ACG.1.1	Chr_5	7018203	71	Exluded	Chr_UP	n.a.	n.a.	n.a.	n.a.	n.a.	n.a.	n.a.	n.a.	n.a.	n.a.	n.a.	n.a.	n.a.	n.a.
SmtRNA_01071_Asn_GTT.1.1	Chr_5	3400877	72	Exluded	Chr_UP	n.a.	n.a.	n.a.	n.a.	n.a.	n.a.	n.a.	n.a.	n.a.	n.a.	n.a.	n.a.	n.a.	n.a.
SmtRNA_01203_Asn_GTT.1.1	Chr_5	3404681	72	Exluded	Chr_UP	n.a.	n.a.	n.a.	n.a.	n.a.	n.a.	n.a.	n.a.	n.a.	n.a.	n.a.	n.a.	n.a.	n.a.
SmtRNA_01216_Asn_GTT.1.1	Chr_5	3407219	72	Exluded	Chr_UP	n.a.	n.a.	n.a.	n.a.	n.a.	n.a.	n.a.	n.a.	n.a.	n.a.	n.a.	n.a.	n.a.	n.a.
SmtRNA_01218_Arg_ACG.1.1	Chr_5	7004538	71	Exluded	Chr_UP	n.a.	n.a.	n.a.	n.a.	n.a.	n.a.	n.a.	n.a.	n.a.	n.a.	n.a.	n.a.	n.a.	n.a.
SmtRNA_01222_Arg_ACG.1.1	Chr_5	7016823	71	Exluded	Chr_UP	n.a.	n.a.	n.a.	n.a.	n.a.	n.a.	n.a.	n.a.	n.a.	n.a.	n.a.	n.a.	n.a.	n.a.
Smp_159210	Chr_5	6130127	161	Exluded	Chr_UP	n.a.	n.a.	n.a.	n.a.	n.a.	n.a.	Sha_scaffold46	785811	Chr_UP	23	7.2	Autosome	n.a.	n.a.
Smp_022870	Chr_ZW	9118194	4330	Excluded	Chr_UP	n.a.	n.a.	n.a.	n.a.	n.a.	n.a.	Sha_scaffold488	311465	Chr_Z	14	4.3	Z	n.a.	n.a.
Smp_044560	Chr_ZW	13177615	608	Excluded	Chr_UP	n.a.	n.a.	n.a.	n.a.	n.a.	n.a.	Sha_scaffold470	207824	Chr_Z	14	4.4	Z	n.a.	n.a.
Smp_103430	SC_0129	501307	245	Excluded	Chr_UP	n.a.	n.a.	n.a.	n.a.	n.a.	n.a.	Sha_scaffold2018	96811	Chr_UP	15	5.5	Z	n.a.	n.a.
Smp_111800	SC_0129	335082	317	Excluded	Chr_UP	n.a.	n.a.	n.a.	n.a.	n.a.	n.a.	Sha_scaffold755	86879	Chr_newZ	13	4.2	Z	n.a.	n.a.
Smp_113550	Chr_1.unplaced.SC_0122	7796	723	Excluded	Chr_UP	n.a.	n.a.	n.a.	n.a.	n.a.	n.a.	Sha_scaffold2576	47862	Chr_UP	12	4	Z	n.a.	n.a.
Smp_114450	SC_0111	1069281	158	Excluded	Chr_UP	n.a.	n.a.	n.a.	n.a.	n.a.	n.a.	Sha_scaffold951	319925	Chr_Z	14	4.3	Z	n.a.	n.a.
Smp_132880	Chr_ZW	28325892	239	Excluded	Chr_UP	n.a.	n.a.	n.a.	n.a.	n.a.	n.a.	Sha_scaffold2960	58514	Chr_UP	13	4.3	Z	n.a.	n.a.
Smp_145750	SC_0261	88883	4457	Excluded	Chr_UP	n.a.	n.a.	n.a.	n.a.	n.a.	n.a.	Sha_C9455860	148	Chr_UP	9.1	1.8	Z	n.a.	n.a.
Smp_147450	Chr_ZW	28613847	60734	Excluded	Chr_UP	n.a.	n.a.	n.a.	n.a.	n.a.	n.a.	Sha_scaffold3572	29999	Chr_UP	13	4.3	Z	n.a.	n.a.
Smp_179170	Chr_3.unplaced.SC_0105	1044569	6858	Excluded	Chr_UP	n.a.	n.a.	n.a.	n.a.	n.a.	n.a.	Sha_scaffold357	40309	Chr_UP	13	4.6	Z	n.a.	n.a.
Smp_191400	Chr_3.unplaced.SC_0083	961414	428	Excluded	Chr_UP	n.a.	n.a.	n.a.	n.a.	n.a.	n.a.	Sha_scaffold2848	9691	Chr_UP	9	3.1	Z	n.a.	n.a.
Smp_201670	Chr_2	178760	296	Excluded	Chr_UP	n.a.	n.a.	n.a.	n.a.	n.a.	n.a.	Sha_scaffold2556	279375	Chr_Z	14	4.3	Z	n.a.	n.a.
Smp_202330	Chr_3.unplaced.SC_0083	954344	302	Excluded	Chr_UP	n.a.	n.a.	n.a.	n.a.	n.a.	n.a.	Sha_scaffold89	154229	Chr_5	15	5.3	Z	n.a.	n.a.
sma-mir-789a.1.1	Chr_2	26166998	92	Excluded	Chr_UP	n.a.	n.a.	n.a.	n.a.	n.a.	n.a.	n.a.	n.a.	n.a.	n.a.	n.a.	n.a.	n.a.	n.a.
sma.18s-86.1	Chr_4	17464600	1970	Excluded	Chr_UP	n.a.	n.a.	n.a.	n.a.	n.a.	n.a.	n.a.	n.a.	n.a.	n.a.	n.a.	n.a.	n.a.	n.a.
sma.5s-17.1	Chr_1	8233837	116	Excluded	Chr_UP	n.a.	n.a.	n.a.	n.a.	n.a.	n.a.	n.a.	n.a.	n.a.	n.a.	n.a.	n.a.	n.a.	n.a.
sma.srp-1.1.1	Chr_2.unplaced.SC_0120	273037	295	Excluded	Chr_UP	n.a.	n.a.	n.a.	n.a.	n.a.	n.a.	n.a.	n.a.	n.a.	n.a.	n.a.	n.a.	n.a.	n.a.
sma.srp.1.1	Chr_2.unplaced.SC_0120	281455	295	Excluded	Chr_UP	n.a.	n.a.	n.a.	n.a.	n.a.	n.a.	n.a.	n.a.	n.a.	n.a.	n.a.	n.a.	n.a.	n.a.
sma.U4.1.1	Chr_4	8451175	141	Excluded	Chr_UP	n.a.	n.a.	n.a.	n.a.	n.a.	n.a.	n.a.	n.a.	n.a.	n.a.	n.a.	n.a.	n.a.	n.a.
Smp_000290	Chr_3.unplaced.SC_0044	427181	716	Excluded	Chr_UP	n.a.	n.a.	n.a.	n.a.	n.a.	n.a.	n.a.	n.a.	n.a.	n.a.	n.a.	n.a.	n.a.	n.a.
Smp_000370	Chr_3.unplaced.SC_0044	1771	18171	Excluded	Chr_UP	n.a.	n.a.	n.a.	n.a.	n.a.	n.a.	n.a.	n.a.	n.a.	n.a.	n.a.	n.a.	n.a.	n.a.
Smp_006510	SC_0243	62314	1412	Excluded	Chr_UP	n.a.	n.a.	n.a.	n.a.	n.a.	n.a.	n.a.	n.a.	n.a.	n.a.	n.a.	n.a.	n.a.	n.a.
Smp_009230	Chr_6	18567332	412	Excluded	Chr_UP	n.a.	n.a.	n.a.	n.a.	n.a.	n.a.	n.a.	n.a.	n.a.	n.a.	n.a.	n.a.	n.a.	n.a.
Smp_027830	SC_0176	78834	10451	Excluded	Chr_UP	n.a.	n.a.	n.a.	n.a.	n.a.	n.a.	n.a.	n.a.	n.a.	n.a.	n.a.	n.a.	n.a.	n.a.
Smp_028190	Chr_ZW.unplaced.SC_0115	37685	17537	Excluded	Chr_UP	n.a.	n.a.	n.a.	n.a.	n.a.	n.a.	n.a.	n.a.	n.a.	n.a.	n.a.	n.a.	n.a.	n.a.
Smp_032690	Chr_2	728350	15234	Excluded	Chr_UP	n.a.	n.a.	n.a.	n.a.	n.a.	n.a.	n.a.	n.a.	n.a.	n.a.	n.a.	n.a.	n.a.	n.a.
Smp_032710	Chr_2	751880	5390	Excluded	Chr_UP	n.a.	n.a.	n.a.	n.a.	n.a.	n.a.	n.a.	n.a.	n.a.	n.a.	n.a.	n.a.	n.a.	n.a.
Smp_037430	Chr_2.unplaced.SC_0213	33322	1233	Excluded	Chr_UP	n.a.	n.a.	n.a.	n.a.	n.a.	n.a.	n.a.	n.a.	n.a.	n.a.	n.a.	n.a.	n.a.	n.a.
Smp_056460	SC_0097	1244102	7722	Excluded	Chr_UP	n.a.	n.a.	n.a.	n.a.	n.a.	n.a.	n.a.	n.a.	n.a.	n.a.	n.a.	n.a.	n.a.	n.a.
Smp_084340	Chr_2	30277198	2311	Excluded	Chr_UP	n.a.	n.a.	n.a.	n.a.	n.a.	n.a.	n.a.	n.a.	n.a.	n.a.	n.a.	n.a.	n.a.	n.a.
Smp_084450	Chr_ZW	20791158	1478	Excluded	Chr_UP	n.a.	n.a.	n.a.	n.a.	n.a.	n.a.	n.a.	n.a.	n.a.	n.a.	n.a.	n.a.	n.a.	n.a.
Smp_086630	Chr_1.unplaced.SC_0122	71297	2959	Excluded	Chr_UP	n.a.	n.a.	n.a.	n.a.	n.a.	n.a.	n.a.	n.a.	n.a.	n.a.	n.a.	n.a.	n.a.	n.a.
Smp_089330	Chr_6	1546428	1721	Excluded	Chr_UP	n.a.	n.a.	n.a.	n.a.	n.a.	n.a.	n.a.	n.a.	n.a.	n.a.	n.a.	n.a.	n.a.	n.a.
Smp_089470	Chr_2	2746269	2715	Excluded	Chr_UP	n.a.	n.a.	n.a.	n.a.	n.a.	n.a.	n.a.	n.a.	n.a.	n.a.	n.a.	n.a.	n.a.	n.a.
Smp_096830	SC_0154	529182	1276	Excluded	Chr_UP	n.a.	n.a.	n.a.	n.a.	n.a.	n.a.	n.a.	n.a.	n.a.	n.a.	n.a.	n.a.	n.a.	n.a.
Smp_101240	SC_0270	19430	5015	Excluded	Chr_UP	n.a.	n.a.	n.a.	n.a.	n.a.	n.a.	n.a.	n.a.	n.a.	n.a.	n.a.	n.a.	n.a.	n.a.
Smp_102190	Chr_6	17817499	877	Excluded	Chr_UP	n.a.	n.a.	n.a.	n.a.	n.a.	n.a.	n.a.	n.a.	n.a.	n.a.	n.a.	n.a.	n.a.	n.a.
Smp_111710	Chr_1	57623157	362	Excluded	Chr_UP	n.a.	n.a.	n.a.	n.a.	n.a.	n.a.	n.a.	n.a.	n.a.	n.a.	n.a.	n.a.	n.a.	n.a.
Smp_113200	Chr_2	12007017	10936	Excluded	Chr_UP	n.a.	n.a.	n.a.	n.a.	n.a.	n.a.	n.a.	n.a.	n.a.	n.a.	n.a.	n.a.	n.a.	n.a.
Smp_114470	Chr_3.unplaced.SC_0124	780056	302	Excluded	Chr_UP	n.a.	n.a.	n.a.	n.a.	n.a.	n.a.	n.a.	n.a.	n.a.	n.a.	n.a.	n.a.	n.a.	n.a.
Smp_117620	SC_0062	1271456	836	Excluded	Chr_UP	n.a.	n.a.	n.a.	n.a.	n.a.	n.a.	n.a.	n.a.	n.a.	n.a.	n.a.	n.a.	n.a.	n.a.
Smp_118720	SC_0271	87514	36	Excluded	Chr_UP	n.a.	n.a.	n.a.	n.a.	n.a.	n.a.	n.a.	n.a.	n.a.	n.a.	n.a.	n.a.	n.a.	n.a.
Smp_120420	SC_0181	23656	2736	Excluded	Chr_UP	n.a.	n.a.	n.a.	n.a.	n.a.	n.a.	n.a.	n.a.	n.a.	n.a.	n.a.	n.a.	n.a.	n.a.
Smp_121200	Chr_7	8080232	44393	Excluded	Chr_UP	n.a.	n.a.	n.a.	n.a.	n.a.	n.a.	n.a.	n.a.	n.a.	n.a.	n.a.	n.a.	n.a.	n.a.
Smp_122740	Chr_2	32278459	10652	Excluded	Chr_UP	n.a.	n.a.	n.a.	n.a.	n.a.	n.a.	n.a.	n.a.	n.a.	n.a.	n.a.	n.a.	n.a.	n.a.
Smp_122750	Chr_2	32102305	52033	Excluded	Chr_UP	n.a.	n.a.	n.a.	n.a.	n.a.	n.a.	n.a.	n.a.	n.a.	n.a.	n.a.	n.a.	n.a.	n.a.
Smp_122760	Chr_2	32086307	6615	Excluded	Chr_UP	n.a.	n.a.	n.a.	n.a.	n.a.	n.a.	n.a.	n.a.	n.a.	n.a.	n.a.	n.a.	n.a.	n.a.
Smp_122770	Chr_2	32083152	1842	Excluded	Chr_UP	n.a.	n.a.	n.a.	n.a.	n.a.	n.a.	n.a.	n.a.	n.a.	n.a.	n.a.	n.a.	n.a.	n.a.
Smp_122850	Chr_2	17727382	44	Excluded	Chr_UP	n.a.	n.a.	n.a.	n.a.	n.a.	n.a.	n.a.	n.a.	n.a.	n.a.	n.a.	n.a.	n.a.	n.a.
Smp_130620	Chr_ZW	47826405	5758	Excluded	Chr_UP	n.a.	n.a.	n.a.	n.a.	n.a.	n.a.	n.a.	n.a.	n.a.	n.a.	n.a.	n.a.	n.a.	n.a.
Smp_131920	Chr_ZW	4168796	575	Excluded	Chr_UP	n.a.	n.a.	n.a.	n.a.	n.a.	n.a.	n.a.	n.a.	n.a.	n.a.	n.a.	n.a.	n.a.	n.a.
Smp_136600	SC_0186	440053	33920	Excluded	Chr_UP	n.a.	n.a.	n.a.	n.a.	n.a.	n.a.	n.a.	n.a.	n.a.	n.a.	n.a.	n.a.	n.a.	n.a.
Smp_137730	Chr_ZW	1907940	95	Excluded	Chr_UP	n.a.	n.a.	n.a.	n.a.	n.a.	n.a.	n.a.	n.a.	n.a.	n.a.	n.a.	n.a.	n.a.	n.a.
Smp_139870	SC_0307	14907	845	Excluded	Chr_UP	n.a.	n.a.	n.a.	n.a.	n.a.	n.a.	n.a.	n.a.	n.a.	n.a.	n.a.	n.a.	n.a.	n.a.
Smp_140280	Chr_ZW	13336682	845	Excluded	Chr_UP	n.a.	n.a.	n.a.	n.a.	n.a.	n.a.	n.a.	n.a.	n.a.	n.a.	n.a.	n.a.	n.a.	n.a.
Smp_146930	Chr_2	32258013	233	Excluded	Chr_UP	n.a.	n.a.	n.a.	n.a.	n.a.	n.a.	n.a.	n.a.	n.a.	n.a.	n.a.	n.a.	n.a.	n.a.
Smp_153880	Chr_4	14841708	4271	Excluded	Chr_UP	n.a.	n.a.	n.a.	n.a.	n.a.	n.a.	n.a.	n.a.	n.a.	n.a.	n.a.	n.a.	n.a.	n.a.
Smp_154590	Chr_1.unplaced.SC_0122	260665	1672	Excluded	Chr_UP	n.a.	n.a.	n.a.	n.a.	n.a.	n.a.	n.a.	n.a.	n.a.	n.a.	n.a.	n.a.	n.a.	n.a.
Smp_161390	Chr_1	51087513	553	Excluded	Chr_UP	n.a.	n.a.	n.a.	n.a.	n.a.	n.a.	n.a.	n.a.	n.a.	n.a.	n.a.	n.a.	n.a.	n.a.
Smp_164170	Chr_6	19821650	29019	Excluded	Chr_UP	n.a.	n.a.	n.a.	n.a.	n.a.	n.a.	n.a.	n.a.	n.a.	n.a.	n.a.	n.a.	n.a.	n.a.
Smp_166470	Chr_4	17447548	1654	Excluded	Chr_UP	n.a.	n.a.	n.a.	n.a.	n.a.	n.a.	n.a.	n.a.	n.a.	n.a.	n.a.	n.a.	n.a.	n.a.
Smp_166750	Chr_7	8118770	3420	Excluded	Chr_UP	n.a.	n.a.	n.a.	n.a.	n.a.	n.a.	n.a.	n.a.	n.a.	n.a.	n.a.	n.a.	n.a.	n.a.
Smp_170190	Chr_ZW	48276902	845	Excluded	Chr_UP	n.a.	n.a.	n.a.	n.a.	n.a.	n.a.	n.a.	n.a.	n.a.	n.a.	n.a.	n.a.	n.a.	n.a.
Smp_173350	SC_0212	224250	7950	Excluded	Chr_UP	n.a.	n.a.	n.a.	n.a.	n.a.	n.a.	n.a.	n.a.	n.a.	n.a.	n.a.	n.a.	n.a.	n.a.
Smp_173560	Chr_2	32011108	10071	Excluded	Chr_UP	n.a.	n.a.	n.a.	n.a.	n.a.	n.a.	n.a.	n.a.	n.a.	n.a.	n.a.	n.a.	n.a.	n.a.
Smp_174570	Chr_ZW	48285674	260	Excluded	Chr_UP	n.a.	n.a.	n.a.	n.a.	n.a.	n.a.	n.a.	n.a.	n.a.	n.a.	n.a.	n.a.	n.a.	n.a.
Smp_177970	Chr_ZW	28870839	302	Excluded	Chr_UP	n.a.	n.a.	n.a.	n.a.	n.a.	n.a.	n.a.	n.a.	n.a.	n.a.	n.a.	n.a.	n.a.	n.a.
Smp_178030	Chr_1	57621576	516	Excluded	Chr_UP	n.a.	n.a.	n.a.	n.a.	n.a.	n.a.	n.a.	n.a.	n.a.	n.a.	n.a.	n.a.	n.a.	n.a.
Smp_178340	SC_0270	2578	179	Excluded	Chr_UP	n.a.	n.a.	n.a.	n.a.	n.a.	n.a.	Sha_C9998411	n.a.	Chr_UP	0	0	n.a.	n.a.	n.a.
Smp_178820	SC_0041	1962573	188	Excluded	Chr_UP	n.a.	n.a.	n.a.	n.a.	n.a.	n.a.	n.a.	n.a.	n.a.	n.a.	n.a.	n.a.	n.a.	n.a.
Smp_182200	Chr_2	32259381	407	Excluded	Chr_UP	n.a.	n.a.	n.a.	n.a.	n.a.	n.a.	n.a.	n.a.	n.a.	n.a.	n.a.	n.a.	n.a.	n.a.
Smp_182530	SC_0181	15598	2611	Excluded	Chr_UP	n.a.	n.a.	n.a.	n.a.	n.a.	n.a.	n.a.	n.a.	n.a.	n.a.	n.a.	n.a.	n.a.	n.a.
Smp_182990	Chr_1	57631912	317	Excluded	Chr_UP	n.a.	n.a.	n.a.	n.a.	n.a.	n.a.	n.a.	n.a.	n.a.	n.a.	n.a.	n.a.	n.a.	n.a.
Smp_184340	SC_0263	36203	205	Excluded	Chr_UP	n.a.	n.a.	n.a.	n.a.	n.a.	n.a.	n.a.	n.a.	n.a.	n.a.	n.a.	n.a.	n.a.	n.a.
Smp_184360	Chr_1	1006126	2568	Excluded	Chr_UP	n.a.	n.a.	n.a.	n.a.	n.a.	n.a.	n.a.	n.a.	n.a.	n.a.	n.a.	n.a.	n.a.	n.a.
Smp_184380	Chr_1.unplaced.SC_0034	1014893	151	Excluded	Chr_UP	n.a.	n.a.	n.a.	n.a.	n.a.	n.a.	n.a.	n.a.	n.a.	n.a.	n.a.	n.a.	n.a.	n.a.
Smp_185150	SC_0243	93767	5647	Excluded	Chr_UP	n.a.	n.a.	n.a.	n.a.	n.a.	n.a.	n.a.	n.a.	n.a.	n.a.	n.a.	n.a.	n.a.	n.a.
Smp_185160	Chr_ZW	28867087	302	Excluded	Chr_UP	n.a.	n.a.	n.a.	n.a.	n.a.	n.a.	n.a.	n.a.	n.a.	n.a.	n.a.	n.a.	n.a.	n.a.
Smp_185170	SC_0277	72887	504	Excluded	Chr_UP	n.a.	n.a.	n.a.	n.a.	n.a.	n.a.	n.a.	n.a.	n.a.	n.a.	n.a.	n.a.	n.a.	n.a.
Smp_185310	Chr_1	57618762	215	Excluded	Chr_UP	n.a.	n.a.	n.a.	n.a.	n.a.	n.a.	n.a.	n.a.	n.a.	n.a.	n.a.	n.a.	n.a.	n.a.
Smp_185340	Chr_1	26663105	1173	Excluded	Chr_UP	n.a.	n.a.	n.a.	n.a.	n.a.	n.a.	n.a.	n.a.	n.a.	n.a.	n.a.	n.a.	n.a.	n.a.
Smp_185560	Chr_1.unplaced.SC_0034	996858	193	Excluded	Chr_UP	n.a.	n.a.	n.a.	n.a.	n.a.	n.a.	n.a.	n.a.	n.a.	n.a.	n.a.	n.a.	n.a.	n.a.
Smp_186260	SC_0263	32371	101	Excluded	Chr_UP	n.a.	n.a.	n.a.	n.a.	n.a.	n.a.	n.a.	n.a.	n.a.	n.a.	n.a.	n.a.	n.a.	n.a.
Smp_186830	SC_0263	27259	2902	Excluded	Chr_UP	n.a.	n.a.	n.a.	n.a.	n.a.	n.a.	n.a.	n.a.	n.a.	n.a.	n.a.	n.a.	n.a.	n.a.
Smp_187590	Chr_2	6292629	664	Excluded	Chr_UP	n.a.	n.a.	n.a.	n.a.	n.a.	n.a.	n.a.	n.a.	n.a.	n.a.	n.a.	n.a.	n.a.	n.a.
Smp_188780	Chr_6	19843899	335	Excluded	Chr_UP	n.a.	n.a.	n.a.	n.a.	n.a.	n.a.	n.a.	n.a.	n.a.	n.a.	n.a.	n.a.	n.a.	n.a.
Smp_189050	Chr_3	19401027	1215	Excluded	Chr_UP	n.a.	n.a.	n.a.	n.a.	n.a.	n.a.	n.a.	n.a.	n.a.	n.a.	n.a.	n.a.	n.a.	n.a.
Smp_189110	Chr_3	19393033	192	Excluded	Chr_UP	n.a.	n.a.	n.a.	n.a.	n.a.	n.a.	n.a.	n.a.	n.a.	n.a.	n.a.	n.a.	n.a.	n.a.
Smp_190330	SC_0186	477112	494	Excluded	Chr_UP	n.a.	n.a.	n.a.	n.a.	n.a.	n.a.	n.a.	n.a.	n.a.	n.a.	n.a.	n.a.	n.a.	n.a.
Smp_192040	SC_0323	38952	180	Excluded	Chr_UP	n.a.	n.a.	n.a.	n.a.	n.a.	n.a.	n.a.	n.a.	n.a.	n.a.	n.a.	n.a.	n.a.	n.a.
Smp_192470	SC_0163	544551	227	Excluded	Chr_UP	n.a.	n.a.	n.a.	n.a.	n.a.	n.a.	n.a.	n.a.	n.a.	n.a.	n.a.	n.a.	n.a.	n.a.
Smp_192670	SC_0111	397814	431	Excluded	Chr_UP	n.a.	n.a.	n.a.	n.a.	n.a.	n.a.	n.a.	n.a.	n.a.	n.a.	n.a.	n.a.	n.a.	n.a.
Smp_193030	Chr_1.unplaced.SC_0094	965131	2445	Excluded	Chr_UP	n.a.	n.a.	n.a.	n.a.	n.a.	n.a.	n.a.	n.a.	n.a.	n.a.	n.a.	n.a.	n.a.	n.a.
Smp_193630	SC_0271	99951	770	Excluded	Chr_UP	n.a.	n.a.	n.a.	n.a.	n.a.	n.a.	n.a.	n.a.	n.a.	n.a.	n.a.	n.a.	n.a.	n.a.
Smp_193860	Chr_1	1020554	2568	Excluded	Chr_UP	n.a.	n.a.	n.a.	n.a.	n.a.	n.a.	n.a.	n.a.	n.a.	n.a.	n.a.	n.a.	n.a.	n.a.
Smp_193880	Chr_2	17759194	2514	Excluded	Chr_UP	n.a.	n.a.	n.a.	n.a.	n.a.	n.a.	n.a.	n.a.	n.a.	n.a.	n.a.	n.a.	n.a.	n.a.
Smp_194130	Chr_4	31000516	7592	Excluded	Chr_UP	n.a.	n.a.	n.a.	n.a.	n.a.	n.a.	n.a.	n.a.	n.a.	n.a.	n.a.	n.a.	n.a.	n.a.
Smp_194320	SC_0041	2121066	1801	Excluded	Chr_UP	n.a.	n.a.	n.a.	n.a.	n.a.	n.a.	n.a.	n.a.	n.a.	n.a.	n.a.	n.a.	n.a.	n.a.
Smp_198840	SC_0125	1007177	3030	Excluded	Chr_UP	n.a.	n.a.	n.a.	n.a.	n.a.	n.a.	n.a.	n.a.	n.a.	n.a.	n.a.	n.a.	n.a.	n.a.
Smp_200710	Chr_1	18998820	152	Excluded	Chr_UP	n.a.	n.a.	n.a.	n.a.	n.a.	n.a.	n.a.	n.a.	n.a.	n.a.	n.a.	n.a.	n.a.	n.a.
Smp_200820	Chr_1	26650051	3582	Excluded	Chr_UP	n.a.	n.a.	n.a.	n.a.	n.a.	n.a.	n.a.	n.a.	n.a.	n.a.	n.a.	n.a.	n.a.	n.a.
Smp_200830	Chr_1	26654382	386	Excluded	Chr_UP	n.a.	n.a.	n.a.	n.a.	n.a.	n.a.	n.a.	n.a.	n.a.	n.a.	n.a.	n.a.	n.a.	n.a.
Smp_200840	Chr_1	26656410	407	Excluded	Chr_UP	n.a.	n.a.	n.a.	n.a.	n.a.	n.a.	n.a.	n.a.	n.a.	n.a.	n.a.	n.a.	n.a.	n.a.
Smp_200850	Chr_1	26662865	287	Excluded	Chr_UP	n.a.	n.a.	n.a.	n.a.	n.a.	n.a.	n.a.	n.a.	n.a.	n.a.	n.a.	n.a.	n.a.	n.a.
Smp_201830	Chr_2	32539509	290	Excluded	Chr_UP	n.a.	n.a.	n.a.	n.a.	n.a.	n.a.	n.a.	n.a.	n.a.	n.a.	n.a.	n.a.	n.a.	n.a.
Smp_201980	Chr_3	3089432	167	Excluded	Chr_UP	n.a.	n.a.	n.a.	n.a.	n.a.	n.a.	n.a.	n.a.	n.a.	n.a.	n.a.	n.a.	n.a.	n.a.
Smp_202420	Chr_3.unplaced.SC_0220	282027	2738	Excluded	Chr_UP	n.a.	n.a.	n.a.	n.a.	n.a.	n.a.	n.a.	n.a.	n.a.	n.a.	n.a.	n.a.	n.a.	n.a.
Smp_203010	Chr_6	9515588	218	Excluded	Chr_UP	n.a.	n.a.	n.a.	n.a.	n.a.	n.a.	Sha_C10127101	n.a.	Chr_UP	0	0	n.a.	n.a.	n.a.
Smp_203450	Chr_ZW	13111718	1529	Excluded	Chr_UP	n.a.	n.a.	n.a.	n.a.	n.a.	n.a.	n.a.	n.a.	n.a.	n.a.	n.a.	n.a.	n.a.	n.a.
Smp_203600	Chr_ZW	28359457	359	Excluded	Chr_UP	n.a.	n.a.	n.a.	n.a.	n.a.	n.a.	n.a.	n.a.	n.a.	n.a.	n.a.	n.a.	n.a.	n.a.
Smp_204710	SC_0147	61606	4034	Excluded	Chr_UP	n.a.	n.a.	n.a.	n.a.	n.a.	n.a.	Sha_scaffold802	n.a.	Chr_UP	1.5	0	n.a.	n.a.	n.a.
Smp_204790	SC_0150	689867	1656	Excluded	Chr_UP	n.a.	n.a.	n.a.	n.a.	n.a.	n.a.	n.a.	n.a.	n.a.	n.a.	n.a.	n.a.	n.a.	n.a.
Smp_204820	SC_0160	253883	155	Excluded	Chr_UP	n.a.	n.a.	n.a.	n.a.	n.a.	n.a.	n.a.	n.a.	n.a.	n.a.	n.a.	n.a.	n.a.	n.a.
Smp_204840	SC_0163	508204	254	Excluded	Chr_UP	n.a.	n.a.	n.a.	n.a.	n.a.	n.a.	Sha_C9694384	n.a.	Chr_UP	0	1	n.a.	n.a.	n.a.
Smp_205030	SC_0221	318700	242	Excluded	Chr_UP	n.a.	n.a.	n.a.	n.a.	n.a.	n.a.	n.a.	n.a.	n.a.	n.a.	n.a.	n.a.	n.a.	n.a.
Smp_205070	SC_0221	154094	188	Excluded	Chr_UP	n.a.	n.a.	n.a.	n.a.	n.a.	n.a.	n.a.	n.a.	n.a.	n.a.	n.a.	n.a.	n.a.	n.a.
Smp_205080	SC_0221	314721	188	Excluded	Chr_UP	n.a.	n.a.	n.a.	n.a.	n.a.	n.a.	n.a.	n.a.	n.a.	n.a.	n.a.	n.a.	n.a.	n.a.
Smp_205090	SC_0221	317678	188	Excluded	Chr_UP	n.a.	n.a.	n.a.	n.a.	n.a.	n.a.	n.a.	n.a.	n.a.	n.a.	n.a.	n.a.	n.a.	n.a.
Smp_205120	SC_0224	306417	182	Excluded	Chr_UP	n.a.	n.a.	n.a.	n.a.	n.a.	n.a.	n.a.	n.a.	n.a.	n.a.	n.a.	n.a.	n.a.	n.a.
Smp_205220	SC_0261	75433	215	Excluded	Chr_UP	n.a.	n.a.	n.a.	n.a.	n.a.	n.a.	n.a.	n.a.	n.a.	n.a.	n.a.	n.a.	n.a.	n.a.
Smp_205290	SC_0271	86838	167	Excluded	Chr_UP	n.a.	n.a.	n.a.	n.a.	n.a.	n.a.	n.a.	n.a.	n.a.	n.a.	n.a.	n.a.	n.a.	n.a.
SmtRNA_00001_His.1	Chr_4	4368331	71	Excluded	Chr_UP	n.a.	n.a.	n.a.	n.a.	n.a.	n.a.	n.a.	n.a.	n.a.	n.a.	n.a.	n.a.	n.a.	n.a.
SmtRNA_00003_Thr.1	SC_0277	91120	72	Excluded	Chr_UP	n.a.	n.a.	n.a.	n.a.	n.a.	n.a.	n.a.	n.a.	n.a.	n.a.	n.a.	n.a.	n.a.	n.a.
SmtRNA_00021_Arg.1	Chr_ZW	28348020	72	Excluded	Chr_UP	n.a.	n.a.	n.a.	n.a.	n.a.	n.a.	n.a.	n.a.	n.a.	n.a.	n.a.	n.a.	n.a.	n.a.
SmtRNA_00107_Gln_CTG.1.1	Chr_6	19660484	70	Excluded	Chr_UP	n.a.	n.a.	n.a.	n.a.	n.a.	n.a.	n.a.	n.a.	n.a.	n.a.	n.a.	n.a.	n.a.	n.a.
SmtRNA_00139_Pseudo_TTG.1.1	Chr_ZW	11356699	70	Excluded	Chr_UP	n.a.	n.a.	n.a.	n.a.	n.a.	n.a.	n.a.	n.a.	n.a.	n.a.	n.a.	n.a.	n.a.	n.a.
SmtRNA_00142_Leu_TAA.1.1	Chr_1	28989553	82	Excluded	Chr_UP	n.a.	n.a.	n.a.	n.a.	n.a.	n.a.	n.a.	n.a.	n.a.	n.a.	n.a.	n.a.	n.a.	n.a.
SmtRNA_00146_Pseudo_TTG.1.1	Chr_3.unplaced.SC_0124	626730	71	Excluded	Chr_UP	n.a.	n.a.	n.a.	n.a.	n.a.	n.a.	n.a.	n.a.	n.a.	n.a.	n.a.	n.a.	n.a.	n.a.
SmtRNA_00168_Gln_TTG.1.1	Chr_4	2462925	65	Excluded	Chr_UP	n.a.	n.a.	n.a.	n.a.	n.a.	n.a.	n.a.	n.a.	n.a.	n.a.	n.a.	n.a.	n.a.	n.a.
SmtRNA_00181_Sup_CTA.1.1	Chr_2	21524897	71	Excluded	Chr_UP	n.a.	n.a.	n.a.	n.a.	n.a.	n.a.	n.a.	n.a.	n.a.	n.a.	n.a.	n.a.	n.a.	n.a.
SmtRNA_00185_Gln_CTG.1.1	Chr_6	19661755	70	Excluded	Chr_UP	n.a.	n.a.	n.a.	n.a.	n.a.	n.a.	n.a.	n.a.	n.a.	n.a.	n.a.	n.a.	n.a.	n.a.
SmtRNA_00199_Gly_CCC.1.1	Chr_2	26563891	69	Excluded	Chr_UP	n.a.	n.a.	n.a.	n.a.	n.a.	n.a.	n.a.	n.a.	n.a.	n.a.	n.a.	n.a.	n.a.	n.a.
SmtRNA_00200_Pseudo_TCG.1.1	Chr_1	22040125	71	Excluded	Chr_UP	n.a.	n.a.	n.a.	n.a.	n.a.	n.a.	n.a.	n.a.	n.a.	n.a.	n.a.	n.a.	n.a.	n.a.
SmtRNA_00212_Gln_TTG.1.1	Chr_ZW	11359920	66	Excluded	Chr_UP	n.a.	n.a.	n.a.	n.a.	n.a.	n.a.	n.a.	n.a.	n.a.	n.a.	n.a.	n.a.	n.a.	n.a.
SmtRNA_00215_Leu_TAA.1.1	Chr_1	28991053	82	Excluded	Chr_UP	n.a.	n.a.	n.a.	n.a.	n.a.	n.a.	n.a.	n.a.	n.a.	n.a.	n.a.	n.a.	n.a.	n.a.
SmtRNA_00217_Ser_CGA.1.1	Chr_4	26207001	80	Excluded	Chr_UP	n.a.	n.a.	n.a.	n.a.	n.a.	n.a.	n.a.	n.a.	n.a.	n.a.	n.a.	n.a.	n.a.	n.a.
SmtRNA_00219_Pseudo_TTG.1.1	Chr_3.unplaced.SC_0124	888029	71	Excluded	Chr_UP	n.a.	n.a.	n.a.	n.a.	n.a.	n.a.	n.a.	n.a.	n.a.	n.a.	n.a.	n.a.	n.a.	n.a.
SmtRNA_00247_Pseudo_TTG.1.1	SC_0225	3355	66	Excluded	Chr_UP	n.a.	n.a.	n.a.	n.a.	n.a.	n.a.	n.a.	n.a.	n.a.	n.a.	n.a.	n.a.	n.a.	n.a.
SmtRNA_00261_Pseudo_GTG.1.1	Chr_3.unplaced.SC_0044	37831	70	Excluded	Chr_UP	n.a.	n.a.	n.a.	n.a.	n.a.	n.a.	n.a.	n.a.	n.a.	n.a.	n.a.	n.a.	n.a.	n.a.
SmtRNA_00271_Gly_CCC.1.1	Chr_2	26561939	69	Excluded	Chr_UP	n.a.	n.a.	n.a.	n.a.	n.a.	n.a.	n.a.	n.a.	n.a.	n.a.	n.a.	n.a.	n.a.	n.a.
SmtRNA_00320_Arg_TCG.1.1	Chr_2	26179071	71	Excluded	Chr_UP	n.a.	n.a.	n.a.	n.a.	n.a.	n.a.	n.a.	n.a.	n.a.	n.a.	n.a.	n.a.	n.a.	n.a.
SmtRNA_00365_Arg_TCG.1.1	Chr_2	26180271	71	Excluded	Chr_UP	n.a.	n.a.	n.a.	n.a.	n.a.	n.a.	n.a.	n.a.	n.a.	n.a.	n.a.	n.a.	n.a.	n.a.
SmtRNA_00407_Pseudo_CGA.1.1	Chr_ZW	32738142	69	Excluded	Chr_UP	n.a.	n.a.	n.a.	n.a.	n.a.	n.a.	n.a.	n.a.	n.a.	n.a.	n.a.	n.a.	n.a.	n.a.
SmtRNA_00439_Gln_TTG.1.1	Chr_ZW	15174175	66	Excluded	Chr_UP	n.a.	n.a.	n.a.	n.a.	n.a.	n.a.	n.a.	n.a.	n.a.	n.a.	n.a.	n.a.	n.a.	n.a.
SmtRNA_00442_Gln_TTG.1.1	Chr_4.unplaced.SC_0032	430155	66	Excluded	Chr_UP	n.a.	n.a.	n.a.	n.a.	n.a.	n.a.	n.a.	n.a.	n.a.	n.a.	n.a.	n.a.	n.a.	n.a.
SmtRNA_00545_Pseudo_TTC.1.1	Chr_2	6350832	68	Excluded	Chr_UP	n.a.	n.a.	n.a.	n.a.	n.a.	n.a.	n.a.	n.a.	n.a.	n.a.	n.a.	n.a.	n.a.	n.a.
SmtRNA_00647_Gln_TTG.1.1	Chr_6	11345259	66	Excluded	Chr_UP	n.a.	n.a.	n.a.	n.a.	n.a.	n.a.	n.a.	n.a.	n.a.	n.a.	n.a.	n.a.	n.a.	n.a.
SmtRNA_00698_Gln_TTG.1.1	Chr_1.unplaced.SC_0094	639958	66	Excluded	Chr_UP	n.a.	n.a.	n.a.	n.a.	n.a.	n.a.	n.a.	n.a.	n.a.	n.a.	n.a.	n.a.	n.a.	n.a.
SmtRNA_00715_His_GTG.1.1	Chr_1	21153672	70	Excluded	Chr_UP	n.a.	n.a.	n.a.	n.a.	n.a.	n.a.	n.a.	n.a.	n.a.	n.a.	n.a.	n.a.	n.a.	n.a.
SmtRNA_00779_Gln_CTG.1.1	Chr_6	19655382	70	Excluded	Chr_UP	n.a.	n.a.	n.a.	n.a.	n.a.	n.a.	n.a.	n.a.	n.a.	n.a.	n.a.	n.a.	n.a.	n.a.
SmtRNA_00799_Trp_CCA.1.1	Chr_1	53484926	70	Excluded	Chr_UP	n.a.	n.a.	n.a.	n.a.	n.a.	n.a.	n.a.	n.a.	n.a.	n.a.	n.a.	n.a.	n.a.	n.a.
SmtRNA_00801_Phe_GAA.1.1	SC_0013	2681826	71	Excluded	Chr_UP	n.a.	n.a.	n.a.	n.a.	n.a.	n.a.	n.a.	n.a.	n.a.	n.a.	n.a.	n.a.	n.a.	n.a.
SmtRNA_00803_Leu_CAG.1.1	Chr_4	26201012	81	Excluded	Chr_UP	n.a.	n.a.	n.a.	n.a.	n.a.	n.a.	n.a.	n.a.	n.a.	n.a.	n.a.	n.a.	n.a.	n.a.
SmtRNA_00804_Glu_TTC.1.1	SC_0013	2693197	70	Excluded	Chr_UP	n.a.	n.a.	n.a.	n.a.	n.a.	n.a.	n.a.	n.a.	n.a.	n.a.	n.a.	n.a.	n.a.	n.a.
SmtRNA_00810_Gln_CTG.1.1	Chr_6	19687725	70	Excluded	Chr_UP	n.a.	n.a.	n.a.	n.a.	n.a.	n.a.	n.a.	n.a.	n.a.	n.a.	n.a.	n.a.	n.a.	n.a.
SmtRNA_00811_Ser_CGA.1.1	Chr_4	26186728	80	Excluded	Chr_UP	n.a.	n.a.	n.a.	n.a.	n.a.	n.a.	n.a.	n.a.	n.a.	n.a.	n.a.	n.a.	n.a.	n.a.
SmtRNA_00816_Thr_AGT.1.1	Chr_1.unplaced.SC_0034	1011499	71	Excluded	Chr_UP	n.a.	n.a.	n.a.	n.a.	n.a.	n.a.	n.a.	n.a.	n.a.	n.a.	n.a.	n.a.	n.a.	n.a.
SmtRNA_00818_Trp_CCA.1.1	Chr_1	53487507	70	Excluded	Chr_UP	n.a.	n.a.	n.a.	n.a.	n.a.	n.a.	n.a.	n.a.	n.a.	n.a.	n.a.	n.a.	n.a.	n.a.
SmtRNA_00820_Glu_CTC.1.1	SC_0013	2702178	69	Excluded	Chr_UP	n.a.	n.a.	n.a.	n.a.	n.a.	n.a.	n.a.	n.a.	n.a.	n.a.	n.a.	n.a.	n.a.	n.a.
SmtRNA_00823_Ser_CGA.1.1	Chr_4	26173764	79	Excluded	Chr_UP	n.a.	n.a.	n.a.	n.a.	n.a.	n.a.	n.a.	n.a.	n.a.	n.a.	n.a.	n.a.	n.a.	n.a.
SmtRNA_00944_Gln_TTG.1.1	Chr_ZW	626728	66	Excluded	Chr_UP	n.a.	n.a.	n.a.	n.a.	n.a.	n.a.	n.a.	n.a.	n.a.	n.a.	n.a.	n.a.	n.a.	n.a.
SmtRNA_00971_Pseudo_TTG.1.1	Chr_2	6447072	68	Excluded	Chr_UP	n.a.	n.a.	n.a.	n.a.	n.a.	n.a.	n.a.	n.a.	n.a.	n.a.	n.a.	n.a.	n.a.	n.a.
SmtRNA_01001_Pseudo_???.1.1	Chr_ZW	28601710	74	Excluded	Chr_UP	n.a.	n.a.	n.a.	n.a.	n.a.	n.a.	n.a.	n.a.	n.a.	n.a.	n.a.	n.a.	n.a.	n.a.
SmtRNA_01083_Gln_TTG.1.1	Chr_1	25704787	66	Excluded	Chr_UP	n.a.	n.a.	n.a.	n.a.	n.a.	n.a.	n.a.	n.a.	n.a.	n.a.	n.a.	n.a.	n.a.	n.a.
SmtRNA_01122_Gln_TTG.1.1	Chr_3	15441792	66	Excluded	Chr_UP	n.a.	n.a.	n.a.	n.a.	n.a.	n.a.	n.a.	n.a.	n.a.	n.a.	n.a.	n.a.	n.a.	n.a.
SmtRNA_01136_Val_TAC.1.1	Chr_1	58832739	71	Excluded	Chr_UP	n.a.	n.a.	n.a.	n.a.	n.a.	n.a.	n.a.	n.a.	n.a.	n.a.	n.a.	n.a.	n.a.	n.a.
SmtRNA_01180_Gln_TTG.1.1	Chr_6	19656640	70	Excluded	Chr_UP	n.a.	n.a.	n.a.	n.a.	n.a.	n.a.	n.a.	n.a.	n.a.	n.a.	n.a.	n.a.	n.a.	n.a.
SmtRNA_01195_Glu_TTC.1.1	SC_0013	2693198	70	Excluded	Chr_UP	n.a.	n.a.	n.a.	n.a.	n.a.	n.a.	n.a.	n.a.	n.a.	n.a.	n.a.	n.a.	n.a.	n.a.
SmtRNA_01199_Gln_CTG.1.1	Chr_6	19687724	70	Excluded	Chr_UP	n.a.	n.a.	n.a.	n.a.	n.a.	n.a.	n.a.	n.a.	n.a.	n.a.	n.a.	n.a.	n.a.	n.a.
SmtRNA_01200_His_GTG.1.1	Chr_1	21176459	70	Excluded	Chr_UP	n.a.	n.a.	n.a.	n.a.	n.a.	n.a.	n.a.	n.a.	n.a.	n.a.	n.a.	n.a.	n.a.	n.a.
SmtRNA_01201_Ser_CGA.1.1	Chr_4	26203288	80	Excluded	Chr_UP	n.a.	n.a.	n.a.	n.a.	n.a.	n.a.	n.a.	n.a.	n.a.	n.a.	n.a.	n.a.	n.a.	n.a.
SmtRNA_01208_Gln_TTG.1.1	Chr_6	19689004	70	Excluded	Chr_UP	n.a.	n.a.	n.a.	n.a.	n.a.	n.a.	n.a.	n.a.	n.a.	n.a.	n.a.	n.a.	n.a.	n.a.
SmtRNA_01215_Ala_TGC.1.1	Chr_1	9457701	70	Excluded	Chr_UP	n.a.	n.a.	n.a.	n.a.	n.a.	n.a.	n.a.	n.a.	n.a.	n.a.	n.a.	n.a.	n.a.	n.a.
SmtRNA_01217_Gln_TTG.1.1	Chr_6	19665549	70	Excluded	Chr_UP	n.a.	n.a.	n.a.	n.a.	n.a.	n.a.	n.a.	n.a.	n.a.	n.a.	n.a.	n.a.	n.a.	n.a.
SmtRNA_01220_Ser_TGA.1.1	Chr_3	19393146	80	Excluded	Chr_UP	n.a.	n.a.	n.a.	n.a.	n.a.	n.a.	n.a.	n.a.	n.a.	n.a.	n.a.	n.a.	n.a.	n.a.
SmtRNA_01236_Pseudo_TTG.1.1	Chr_1	6712242	71	Excluded	Chr_UP	n.a.	n.a.	n.a.	n.a.	n.a.	n.a.	n.a.	n.a.	n.a.	n.a.	n.a.	n.a.	n.a.	n.a.
SmtRNA_01256_Lys_CTT.1.1	Chr_1	8319980	71	Excluded	Chr_UP	n.a.	n.a.	n.a.	n.a.	n.a.	n.a.	n.a.	n.a.	n.a.	n.a.	n.a.	n.a.	n.a.	n.a.
SmtRNA_01296_Gln_TTG.1.1	Chr_ZW	9099761	65	Excluded	Chr_UP	n.a.	n.a.	n.a.	n.a.	n.a.	n.a.	n.a.	n.a.	n.a.	n.a.	n.a.	n.a.	n.a.	n.a.
SmtRNA_01297_Sup_TTA.1.1	Chr_7	7136826	66	Excluded	Chr_UP	n.a.	n.a.	n.a.	n.a.	n.a.	n.a.	n.a.	n.a.	n.a.	n.a.	n.a.	n.a.	n.a.	n.a.
SmtRNA_01310_Gln_TTG.1.1	Chr_3.unplaced.SC_0124	839427	66	Excluded	Chr_UP	n.a.	n.a.	n.a.	n.a.	n.a.	n.a.	n.a.	n.a.	n.a.	n.a.	n.a.	n.a.	n.a.	n.a.
SmtRNA_01311_Gln_TTG.1.1	Chr_3.unplaced.SC_0192	40683	66	Excluded	Chr_UP	n.a.	n.a.	n.a.	n.a.	n.a.	n.a.	n.a.	n.a.	n.a.	n.a.	n.a.	n.a.	n.a.	n.a.
SmtRNA_01327_Thr_AGT.1.1	Chr_1.unplaced.SC_0034	995288	71	Excluded	Chr_UP	n.a.	n.a.	n.a.	n.a.	n.a.	n.a.	n.a.	n.a.	n.a.	n.a.	n.a.	n.a.	n.a.	n.a.
SmtRNA_01348_Leu_TAG.1.1	Chr_ZW	37603189	78	Excluded	Chr_UP	n.a.	n.a.	n.a.	n.a.	n.a.	n.a.	n.a.	n.a.	n.a.	n.a.	n.a.	n.a.	n.a.	n.a.
SmtRNA_01352_Gln_TTG.1.1	Chr_ZW	28476118	66	Excluded	Chr_UP	n.a.	n.a.	n.a.	n.a.	n.a.	n.a.	n.a.	n.a.	n.a.	n.a.	n.a.	n.a.	n.a.	n.a.
SmtRNA_01365_Gln_TTG.1.1	SC_0041	834007	66	Excluded	Chr_UP	n.a.	n.a.	n.a.	n.a.	n.a.	n.a.	n.a.	n.a.	n.a.	n.a.	n.a.	n.a.	n.a.	n.a.
SmtRNA_01380_Gln_TTG.1.1	SC_0173	522069	66	Excluded	Chr_UP	n.a.	n.a.	n.a.	n.a.	n.a.	n.a.	n.a.	n.a.	n.a.	n.a.	n.a.	n.a.	n.a.	n.a.
SmtRNA_01405_Trp_CCA.1.1	Chr_1	53490906	70	Excluded	Chr_UP	n.a.	n.a.	n.a.	n.a.	n.a.	n.a.	n.a.	n.a.	n.a.	n.a.	n.a.	n.a.	n.a.	n.a.
SmtRNA_01407_Pseudo_TTG.1.1	Chr_4	916998	70	Excluded	Chr_UP	n.a.	n.a.	n.a.	n.a.	n.a.	n.a.	n.a.	n.a.	n.a.	n.a.	n.a.	n.a.	n.a.	n.a.
SmtRNA_01457_Gln_TTG.1.1	Chr_3	15456890	65	Excluded	Chr_UP	n.a.	n.a.	n.a.	n.a.	n.a.	n.a.	n.a.	n.a.	n.a.	n.a.	n.a.	n.a.	n.a.	n.a.
SmtRNA_01470_Val_TAC.1.1	Chr_1	58848305	71	Excluded	Chr_UP	n.a.	n.a.	n.a.	n.a.	n.a.	n.a.	n.a.	n.a.	n.a.	n.a.	n.a.	n.a.	n.a.	n.a.
SmtRNA_01481_Lys_CTT.1.1	Chr_6	9960606	71	Excluded	Chr_UP	n.a.	n.a.	n.a.	n.a.	n.a.	n.a.	n.a.	n.a.	n.a.	n.a.	n.a.	n.a.	n.a.	n.a.
SmtRNA_01487_Sup_TTA.1.1	Chr_ZW	44076152	66	Excluded	Chr_UP	n.a.	n.a.	n.a.	n.a.	n.a.	n.a.	n.a.	n.a.	n.a.	n.a.	n.a.	n.a.	n.a.	n.a.
SmtRNA_01510_Ala_TGC.1.1	Chr_1	9432398	70	Excluded	Chr_UP	n.a.	n.a.	n.a.	n.a.	n.a.	n.a.	n.a.	n.a.	n.a.	n.a.	n.a.	n.a.	n.a.	n.a.
SmtRNA_01542_Pseudo_TTG.1.1	SC_0243	212516	71	Excluded	Chr_UP	n.a.	n.a.	n.a.	n.a.	n.a.	n.a.	n.a.	n.a.	n.a.	n.a.	n.a.	n.a.	n.a.	n.a.
SmtRNA_01571_Gln_TTG.1.1	Chr_ZW	9102871	66	Excluded	Chr_UP	n.a.	n.a.	n.a.	n.a.	n.a.	n.a.	n.a.	n.a.	n.a.	n.a.	n.a.	n.a.	n.a.	n.a.
SmtRNA_01584_Gln_TTG.1.1	Chr_3.unplaced.SC_0124	625210	66	Excluded	Chr_UP	n.a.	n.a.	n.a.	n.a.	n.a.	n.a.	n.a.	n.a.	n.a.	n.a.	n.a.	n.a.	n.a.	n.a.
SmtRNA_01643_Gln_TTG.1.1	Chr_1	3820005	65	Excluded	Chr_UP	n.a.	n.a.	n.a.	n.a.	n.a.	n.a.	n.a.	n.a.	n.a.	n.a.	n.a.	n.a.	n.a.	n.a.
SmtRNA_01672_Trp_CCA.1.1	Chr_1	53490043	70	Excluded	Chr_UP	n.a.	n.a.	n.a.	n.a.	n.a.	n.a.	n.a.	n.a.	n.a.	n.a.	n.a.	n.a.	n.a.	n.a.
SmtRNA_01718_Met_CAT.1.1	SC_0041	991347	70	Excluded	Chr_UP	n.a.	n.a.	n.a.	n.a.	n.a.	n.a.	n.a.	n.a.	n.a.	n.a.	n.a.	n.a.	n.a.	n.a.
SmtRNA_01737_Glu_TTC.1.1	SC_0013	2676545	70	Excluded	Chr_UP	n.a.	n.a.	n.a.	n.a.	n.a.	n.a.	n.a.	n.a.	n.a.	n.a.	n.a.	n.a.	n.a.	n.a.
SmtRNA_01875_Trp_CCA.1.1	Chr_1	53489174	70	Excluded	Chr_UP	n.a.	n.a.	n.a.	n.a.	n.a.	n.a.	n.a.	n.a.	n.a.	n.a.	n.a.	n.a.	n.a.	n.a.
SmtRNA_01942_Pseudo_TAC.1.1	Chr_3.unplaced.SC_0044	918769	82	Excluded	Chr_UP	n.a.	n.a.	n.a.	n.a.	n.a.	n.a.	n.a.	n.a.	n.a.	n.a.	n.a.	n.a.	n.a.	n.a.
SmtRNA_01960_Pseudo_TCG.1.1	Chr_2	11998628	70	Excluded	Chr_UP	n.a.	n.a.	n.a.	n.a.	n.a.	n.a.	n.a.	n.a.	n.a.	n.a.	n.a.	n.a.	n.a.	n.a.
SmtRNA_01977_Gln_TTG.1.1	Chr_6	10790585	65	Excluded	Chr_UP	n.a.	n.a.	n.a.	n.a.	n.a.	n.a.	n.a.	n.a.	n.a.	n.a.	n.a.	n.a.	n.a.	n.a.
SmtRNA_01982_Gln_TTG.1.1	Chr_ZW.unplaced.SC_0115	38989	66	Excluded	Chr_UP	n.a.	n.a.	n.a.	n.a.	n.a.	n.a.	n.a.	n.a.	n.a.	n.a.	n.a.	n.a.	n.a.	n.a.
SmtRNA_02020_Pseudo_TTG.1.1	Chr_4.unplaced.SC_0032	1357093	70	Excluded	Chr_UP	n.a.	n.a.	n.a.	n.a.	n.a.	n.a.	n.a.	n.a.	n.a.	n.a.	n.a.	n.a.	n.a.	n.a.
SmtRNA_02054_Trp_CCA.1.1	Chr_1	53488311	70	Excluded	Chr_UP	n.a.	n.a.	n.a.	n.a.	n.a.	n.a.	n.a.	n.a.	n.a.	n.a.	n.a.	n.a.	n.a.	n.a.
SmtRNA_02073_Lys_CTT.1.1	Chr_6	9972708	71	Excluded	Chr_UP	n.a.	n.a.	n.a.	n.a.	n.a.	n.a.	n.a.	n.a.	n.a.	n.a.	n.a.	n.a.	n.a.	n.a.
SmtRNA_02080_Pseudo_TTG.1.1	SC_0228	200389	72	Excluded	Chr_UP	n.a.	n.a.	n.a.	n.a.	n.a.	n.a.	n.a.	n.a.	n.a.	n.a.	n.a.	n.a.	n.a.	n.a.
SmtRNA_02086_Gln_TTG.1.1	SC_0207	86570	68	Excluded	Chr_UP	n.a.	n.a.	n.a.	n.a.	n.a.	n.a.	n.a.	n.a.	n.a.	n.a.	n.a.	n.a.	n.a.	n.a.
SmtRNA_02117_Pseudo_TTG.1.1	Chr_3.unplaced.SC_0105	580161	66	Excluded	Chr_UP	n.a.	n.a.	n.a.	n.a.	n.a.	n.a.	n.a.	n.a.	n.a.	n.a.	n.a.	n.a.	n.a.	n.a.
SmtRNA_02129_Sup_TTA.1.1	Chr_6	10829592	66	Excluded	Chr_UP	n.a.	n.a.	n.a.	n.a.	n.a.	n.a.	n.a.	n.a.	n.a.	n.a.	n.a.	n.a.	n.a.	n.a.
SmtRNA_02130_Pseudo_TTG.1.1	Chr_1	637214	71	Excluded	Chr_UP	n.a.	n.a.	n.a.	n.a.	n.a.	n.a.	n.a.	n.a.	n.a.	n.a.	n.a.	n.a.	n.a.	n.a.
SmtRNA_02150_Pseudo_CGA.1.1	SC_0151	7188	69	Excluded	Chr_UP	n.a.	n.a.	n.a.	n.a.	n.a.	n.a.	n.a.	n.a.	n.a.	n.a.	n.a.	n.a.	n.a.	n.a.
SmtRNA_02196_Trp_CCA.1.1	Chr_1	53485806	70	Excluded	Chr_UP	n.a.	n.a.	n.a.	n.a.	n.a.	n.a.	n.a.	n.a.	n.a.	n.a.	n.a.	n.a.	n.a.	n.a.
SmtRNA_02209_Gln_CTG.1.1	Chr_6	19632738	70	Excluded	Chr_UP	n.a.	n.a.	n.a.	n.a.	n.a.	n.a.	n.a.	n.a.	n.a.	n.a.	n.a.	n.a.	n.a.	n.a.
SmtRNA_02244_Ser_CGA.1.1	Chr_3.unplaced.SC_0105	585819	80	Excluded	Chr_UP	n.a.	n.a.	n.a.	n.a.	n.a.	n.a.	n.a.	n.a.	n.a.	n.a.	n.a.	n.a.	n.a.	n.a.
SmtRNA_02261_Ser_TGA.1.1	Chr_3	19398438	80	Excluded	Chr_UP	n.a.	n.a.	n.a.	n.a.	n.a.	n.a.	n.a.	n.a.	n.a.	n.a.	n.a.	n.a.	n.a.	n.a.
SmtRNA_02316_Trp_CCA.1.1	Chr_1	53484927	70	Excluded	Chr_UP	n.a.	n.a.	n.a.	n.a.	n.a.	n.a.	n.a.	n.a.	n.a.	n.a.	n.a.	n.a.	n.a.	n.a.
SmtRNA_02326_Gln_CTG.1.1	Chr_6	19633996	70	Excluded	Chr_UP	n.a.	n.a.	n.a.	n.a.	n.a.	n.a.	n.a.	n.a.	n.a.	n.a.	n.a.	n.a.	n.a.	n.a.
SmtRNA_02331_Pseudo_TTG.1.1	Chr_3.unplaced.SC_0044	1748043	66	Excluded	Chr_UP	n.a.	n.a.	n.a.	n.a.	n.a.	n.a.	n.a.	n.a.	n.a.	n.a.	n.a.	n.a.	n.a.	n.a.
SmtRNA_02377_Ser_TGA.1.1	Chr_3	19386109	80	Excluded	Chr_UP	n.a.	n.a.	n.a.	n.a.	n.a.	n.a.	n.a.	n.a.	n.a.	n.a.	n.a.	n.a.	n.a.	n.a.
SmtRNA_02426_Trp_CCA.1.1	Chr_1	53484052	70	Excluded	Chr_UP	n.a.	n.a.	n.a.	n.a.	n.a.	n.a.	n.a.	n.a.	n.a.	n.a.	n.a.	n.a.	n.a.	n.a.
SmtRNA_02436_Gln_CTG.1.1	Chr_6	19659213	70	Excluded	Chr_UP	n.a.	n.a.	n.a.	n.a.	n.a.	n.a.	n.a.	n.a.	n.a.	n.a.	n.a.	n.a.	n.a.	n.a.
Smp_002860	Chr_6	2814048	2335	Excluded	Chr_UP	n.a.	n.a.	n.a.	n.a.	n.a.	n.a.	Sha_scaffold93	289380	Chr_UP	22	6.8	Autosome	n.a.	n.a.
Smp_004790	Chr_2	26142866	8021	Excluded	Chr_UP	n.a.	n.a.	n.a.	n.a.	n.a.	n.a.	Sha_scaffold2226	142176	Chr_2	23	7.1	Autosome	n.a.	n.a.
Smp_027290	Chr_4	26337681	1633	Excluded	Chr_UP	n.a.	n.a.	n.a.	n.a.	n.a.	n.a.	Sha_scaffold500	129947	Chr_UP	22	7.1	Autosome	n.a.	n.a.
Smp_029400	Chr_3.unplaced.SC_0124	890177	9301	Excluded	Chr_UP	n.a.	n.a.	n.a.	n.a.	n.a.	n.a.	Sha_scaffold362	579311	Chr_UP	25	7.8	Autosome	n.a.	n.a.
Smp_049300	Chr_1	49146690	1721	Excluded	Chr_UP	n.a.	n.a.	n.a.	n.a.	n.a.	n.a.	Sha_scaffold2886	37675	Chr_1	18	6.3	Autosome	n.a.	n.a.
Smp_075800	Chr_3.unplaced.SC_0105	1059980	23897	Excluded	Chr_UP	n.a.	n.a.	n.a.	n.a.	n.a.	n.a.	Sha_scaffold290	82252	Chr_UP	19	6	Autosome	n.a.	n.a.
Smp_077920	Chr_3.unplaced.SC_0044	414976	1030	Excluded	Chr_UP	n.a.	n.a.	n.a.	n.a.	n.a.	n.a.	Sha_scaffold1670	134015	Chr_UP	23	7.1	Autosome	n.a.	n.a.
Smp_084440	Chr_ZW	20792746	38468	Excluded	Chr_UP	n.a.	n.a.	n.a.	n.a.	n.a.	n.a.	Sha_scaffold3708	9151	Chr_UP	19	6.3	Autosome	n.a.	n.a.
Smp_089320	Chr_6	1519965	4790	Excluded	Chr_UP	n.a.	n.a.	n.a.	n.a.	n.a.	n.a.	Sha_scaffold514	163886	Chr_6	21	6.7	Autosome	n.a.	n.a.
Smp_099910	Chr_1	56403269	2294	Excluded	Chr_UP	n.a.	n.a.	n.a.	n.a.	n.a.	n.a.	Sha_scaffold1982	154760	Chr_UP	23	7.2	Autosome	n.a.	n.a.
Smp_110310	Chr_ZW	24884583	825	Excluded	Chr_UP	n.a.	n.a.	n.a.	n.a.	n.a.	n.a.	Sha_scaffold772	98697	Chr_PSA	20	6.4	Autosome	n.a.	n.a.
Smp_111320	SC_0221	135352	1177	Excluded	Chr_UP	n.a.	n.a.	n.a.	n.a.	n.a.	n.a.	Sha_scaffold2110	27217	Chr_UP	25	8.2	Autosome	n.a.	n.a.
Smp_111640	SC_0335	42907	161	Excluded	Chr_UP	n.a.	n.a.	n.a.	n.a.	n.a.	n.a.	Sha_scaffold4549	5718	Chr_UP	30	11	Autosome	n.a.	n.a.
Smp_112110	Chr_3	12695776	614	Excluded	Chr_UP	n.a.	n.a.	n.a.	n.a.	n.a.	n.a.	Sha_scaffold576	38584	Chr_UP	24	7.5	Autosome	n.a.	n.a.
Smp_119060	Chr_6	1585987	1739	Excluded	Chr_UP	n.a.	n.a.	n.a.	n.a.	n.a.	n.a.	Sha_scaffold429	720268	Chr_6	20	6.6	Autosome	n.a.	n.a.
Smp_119130	SC_0201	400694	1703	Excluded	Chr_UP	n.a.	n.a.	n.a.	n.a.	n.a.	n.a.	Sha_scaffold6580	14160	Chr_UP	18	5.9	Autosome	n.a.	n.a.
Smp_122630	Chr_1	64283320	17989	Excluded	Chr_UP	n.a.	n.a.	n.a.	n.a.	n.a.	n.a.	Sha_scaffold4	744367	Chr_1	20	6.6	Autosome	n.a.	n.a.
Smp_122860	Chr_2	17709596	57805	Excluded	Chr_UP	n.a.	n.a.	n.a.	n.a.	n.a.	n.a.	Sha_scaffold2052	307068	Chr_2	26	7.9	Autosome	n.a.	n.a.
Smp_123940	Chr_1	8302778	27595	Excluded	Chr_UP	n.a.	n.a.	n.a.	n.a.	n.a.	n.a.	Sha_scaffold468	278539	Chr_1	20	6.2	Autosome	n.a.	n.a.
Smp_123950	Chr_1	8285710	17474	Excluded	Chr_UP	n.a.	n.a.	n.a.	n.a.	n.a.	n.a.	Sha_scaffold468	278539	Chr_1	20	6.2	Autosome	n.a.	n.a.
Smp_124720	Chr_2	26151024	62216	Excluded	Chr_UP	n.a.	n.a.	n.a.	n.a.	n.a.	n.a.	Sha_scaffold239	103474	Chr_2	21	6.7	Autosome	n.a.	n.a.
Smp_125140	SC_0148	238521	7177	Excluded	Chr_UP	n.a.	n.a.	n.a.	n.a.	n.a.	n.a.	Sha_scaffold277	498365	Chr_UP	22	6.9	Autosome	n.a.	n.a.
Smp_136610	SC_0186	445233	176	Excluded	Chr_UP	n.a.	n.a.	n.a.	n.a.	n.a.	n.a.	Sha_scaffold14	425436	Chr_UP	25	7.9	Autosome	n.a.	n.a.
Smp_138410	Chr_3.unplaced.SC_0192	47843	116	Excluded	Chr_UP	n.a.	n.a.	n.a.	n.a.	n.a.	n.a.	Sha_scaffold510	367761	Chr_3	25	7.8	Autosome	n.a.	n.a.
Smp_140960	Chr_1.unplaced.SC_0094	957771	227	Excluded	Chr_UP	n.a.	n.a.	n.a.	n.a.	n.a.	n.a.	Sha_scaffold2567	29101	Chr_UP	40	14	Autosome	n.a.	n.a.
Smp_145760	SC_0261	78170	6437	Excluded	Chr_UP	n.a.	n.a.	n.a.	n.a.	n.a.	n.a.	Sha_C10119853	1728	Chr_UP	55	16	Autosome	n.a.	n.a.
Smp_146920	Chr_2	32250599	985	Excluded	Chr_UP	n.a.	n.a.	n.a.	n.a.	n.a.	n.a.	Sha_scaffold880	103111	Chr_UP	29	9.6	Autosome	n.a.	n.a.
Smp_170600	Chr_1	58815638	8905	Excluded	Chr_UP	n.a.	n.a.	n.a.	n.a.	n.a.	n.a.	Sha_scaffold2015	43928	Chr_UP	20	6.3	Autosome	n.a.	n.a.
Smp_170890	Chr_6	1613641	8894	Excluded	Chr_UP	n.a.	n.a.	n.a.	n.a.	n.a.	n.a.	Sha_scaffold846	326243	Chr_6	21	6.9	Autosome	n.a.	n.a.
Smp_173160	Chr_2	30244857	16880	Excluded	Chr_UP	n.a.	n.a.	n.a.	n.a.	n.a.	n.a.	Sha_scaffold436	452813	Chr_2	23	7.2	Autosome	n.a.	n.a.
Smp_173460	Chr_3.unplaced.SC_0083	123533	239	Excluded	Chr_UP	n.a.	n.a.	n.a.	n.a.	n.a.	n.a.	Sha_scaffold1256	154811	Chr_UP	28	9.5	Autosome	n.a.	n.a.
Smp_174260	SC_0260	28963	22642	Excluded	Chr_UP	n.a.	n.a.	n.a.	n.a.	n.a.	n.a.	Sha_scaffold1134	164840	Chr_UP	20	6.4	Autosome	n.a.	n.a.
Smp_176870	Chr_3.unplaced.SC_0105	26600	16623	Excluded	Chr_UP	n.a.	n.a.	n.a.	n.a.	n.a.	n.a.	Sha_scaffold353	169979	Chr_UP	21	6.9	Autosome	n.a.	n.a.
Smp_177900	Chr_ZW.unplaced.SC_0115	1032228	2381	Excluded	Chr_UP	n.a.	n.a.	n.a.	n.a.	n.a.	n.a.	Sha_scaffold596	277804	Chr_PSA	23	7.3	Autosome	n.a.	n.a.
Smp_178330	SC_0270	16425	302	Excluded	Chr_UP	n.a.	n.a.	n.a.	n.a.	n.a.	n.a.	Sha_scaffold2414	130586	Chr_UP	22	6.8	Autosome	n.a.	n.a.
Smp_182410	Chr_1.unplaced.SC_0034	1013202	223	Excluded	Chr_UP	n.a.	n.a.	n.a.	n.a.	n.a.	n.a.	Sha_C9809066	363	Chr_UP	270	92	Autosome	n.a.	n.a.
Smp_182600	SC_0327	53000	224	Excluded	Chr_UP	n.a.	n.a.	n.a.	n.a.	n.a.	n.a.	Sha_C9745212	286	Chr_UP	52	20	Autosome	n.a.	n.a.
Smp_183080	SC_0224	303019	383	Excluded	Chr_UP	n.a.	n.a.	n.a.	n.a.	n.a.	n.a.	Sha_C9721452	264	Chr_UP	550	200	Autosome	n.a.	n.a.
Smp_183600	Chr_2	32031186	1560	Excluded	Chr_UP	n.a.	n.a.	n.a.	n.a.	n.a.	n.a.	Sha_C10012611	871	Chr_UP	42	11	Autosome	n.a.	n.a.
Smp_187950	Chr_2	26562719	323	Excluded	Chr_UP	n.a.	n.a.	n.a.	n.a.	n.a.	n.a.	Sha_C9842527	414	Chr_UP	110	32	Autosome	n.a.	n.a.
Smp_190340	Chr_1	57615832	215	Excluded	Chr_UP	n.a.	n.a.	n.a.	n.a.	n.a.	n.a.	Sha_C9859969	445	Chr_UP	430	140	Autosome	n.a.	n.a.
Smp_192060	SC_0335	12792	23937	Excluded	Chr_UP	n.a.	n.a.	n.a.	n.a.	n.a.	n.a.	Sha_scaffold2438	1448	Chr_UP	160	57	Autosome	n.a.	n.a.
Smp_192140	Chr_6	1548868	1047	Excluded	Chr_UP	n.a.	n.a.	n.a.	n.a.	n.a.	n.a.	Sha_C10095565	1432	Chr_UP	150	50	Autosome	n.a.	n.a.
Smp_192220	Chr_3.unplaced.SC_0044	6811	2375	Excluded	Chr_UP	n.a.	n.a.	n.a.	n.a.	n.a.	n.a.	Sha_scaffold159	469019	Chr_UP	25	7.8	Autosome	n.a.	n.a.
Smp_194950	Chr_4	26339718	1607	Excluded	Chr_UP	n.a.	n.a.	n.a.	n.a.	n.a.	n.a.	Sha_scaffold500	129947	Chr_UP	22	7.1	Autosome	n.a.	n.a.
Smp_197780	Chr_3.unplaced.SC_0220	309024	9166	Excluded	Chr_UP	n.a.	n.a.	n.a.	n.a.	n.a.	n.a.	Sha_scaffold392	272288	Chr_UP	21	6.9	Autosome	n.a.	n.a.
Smp_197810	Chr_3.unplaced.SC_0233	190377	74	Excluded	Chr_UP	n.a.	n.a.	n.a.	n.a.	n.a.	n.a.	Sha_scaffold152	554035	Chr_UP	18	6	Autosome	n.a.	n.a.
Smp_200320	Chr_1	7675233	218	Excluded	Chr_UP	n.a.	n.a.	n.a.	n.a.	n.a.	n.a.	Sha_scaffold273	565638	Chr_UP	21	6.6	Autosome	n.a.	n.a.
Smp_200470	Chr_1	9462495	275	Excluded	Chr_UP	n.a.	n.a.	n.a.	n.a.	n.a.	n.a.	Sha_C9465328	150	Chr_UP	250	90	Autosome	n.a.	n.a.
Smp_200480	Chr_1	9464949	479	Excluded	Chr_UP	n.a.	n.a.	n.a.	n.a.	n.a.	n.a.	Sha_scaffold669	279820	Chr_2	20	6.6	Autosome	n.a.	n.a.
Smp_200670	Chr_1	63406385	212	Excluded	Chr_UP	n.a.	n.a.	n.a.	n.a.	n.a.	n.a.	Sha_scaffold891	752079	Chr_2	25	7.8	Autosome	n.a.	n.a.
Smp_200860	Chr_1	26665095	272	Excluded	Chr_UP	n.a.	n.a.	n.a.	n.a.	n.a.	n.a.	Sha_C9702792	249	Chr_UP	530	150	Autosome	n.a.	n.a.
Smp_200870	Chr_1	26673442	407	Excluded	Chr_UP	n.a.	n.a.	n.a.	n.a.	n.a.	n.a.	Sha_scaffold5382	1380	Chr_UP	120	41	Autosome	n.a.	n.a.
Smp_202490	Chr_4	8473830	209	Excluded	Chr_UP	SJC_S001145	2986	Chr_UP	0	1.5	n.a.	Sha_scaffold407	601718	Chr_4	27	8.2	Autosome	n.a.	n.a.
Smp_203090	Chr_6	18599762	307	Excluded	Chr_UP	n.a.	n.a.	n.a.	n.a.	n.a.	n.a.	Sha_scaffold4919	1168	Chr_UP	21	7.1	Autosome	n.a.	n.a.
Smp_203630	Chr_ZW	29404993	869	Excluded	Chr_UP	n.a.	n.a.	n.a.	n.a.	n.a.	n.a.	Sha_C10186136	4285	Chr_UP	48	15	Autosome	n.a.	n.a.
Smp_204180	Chr_ZW	28333375	677	Excluded	Chr_UP	n.a.	n.a.	n.a.	n.a.	n.a.	n.a.	Sha_scaffold643	105529	Chr_2	21	6.8	Autosome	n.a.	n.a.
Smp_204460	SC_0041	984304	206	Excluded	Chr_UP	n.a.	n.a.	n.a.	n.a.	n.a.	n.a.	Sha_C9873483	470	Chr_UP	370	130	Autosome	n.a.	n.a.
Smp_204830	SC_0163	576870	8904	Excluded	Chr_UP	n.a.	n.a.	n.a.	n.a.	n.a.	n.a.	Sha_scaffold110	501683	Chr_UP	21	6.7	Autosome	n.a.	n.a.
Smp_204980	SC_0204	408911	218	Excluded	Chr_UP	n.a.	n.a.	n.a.	n.a.	n.a.	n.a.	Sha_C9899423	524	Chr_UP	86	30	Autosome	n.a.	n.a.
Smp_205320	SC_0283	1570	944	Excluded	Chr_UP	n.a.	n.a.	n.a.	n.a.	n.a.	n.a.	Sha_scaffold770	480042	Chr_UP	24	7.5	Autosome	n.a.	n.a.
Smp_177890	Chr_ZW.unplaced.SC_0115	1034673	593	Excluded	Chr_UP	n.a.	n.a.	n.a.	n.a.	n.a.	n.a.	Sha_scaffold2472	27067	Chr_UP	16	5.6	Ambiguous	n.a.	n.a.
Smp_189290	Chr_1.unplaced.SC_0076	158740	750	Excluded	Chr_UP	n.a.	n.a.	n.a.	n.a.	n.a.	n.a.	Sha_scaffold949	40895	Chr_UP	16	5.5	Ambiguous	n.a.	n.a.
Smp_060070	Chr_1	27017647	21335	Autosome	Chr_1	n.a.	n.a.	n.a.	n.a.	n.a.	n.a.	Sha_scaffold3407	11086	Chr_1	11	5.1	Z	n.a.	n.a.
Smp_077380	Chr_ZW	58211586	452	Autosome	Chr_PSA	n.a.	n.a.	n.a.	n.a.	n.a.	n.a.	Sha_scaffold271	336557	Chr_Z	14	4.4	Z	n.a.	n.a.
Smp_082460	Chr_3	2322642	281	Autosome	Chr_3	n.a.	n.a.	n.a.	n.a.	n.a.	n.a.	Sha_scaffold1132	96652	Chr_3	13	5	Z	n.a.	n.a.
Smp_103640	Chr_3.unplaced.SC_0141	19669	7480	Autosome	Chr_UP	n.a.	n.a.	n.a.	n.a.	n.a.	n.a.	Sha_scaffold2848	9691	Chr_UP	9	3.1	Z	n.a.	n.a.
Smp_106390	SC_0221	3573	1428	Autosome	Chr_UP	n.a.	n.a.	n.a.	n.a.	n.a.	n.a.	Sha_scaffold781	63443	Chr_Z	13	4.5	Z	n.a.	n.a.
Smp_108050	Chr_ZW	1416488	11822	Autosome	Chr_PSA	n.a.	n.a.	n.a.	n.a.	n.a.	n.a.	Sha_scaffold899	56695	Chr_PSA	11	3.3	Z	n.a.	n.a.
Smp_113530	SC_0316	56329	1907	Autosome	Chr_UP	n.a.	n.a.	n.a.	n.a.	n.a.	n.a.	Sha_scaffold2919	32396	Chr_UP	13	4.2	Z	n.a.	n.a.
Smp_114240	Chr_1	5912610	414	Autosome	Chr_1	n.a.	n.a.	n.a.	n.a.	n.a.	n.a.	Sha_scaffold1053	73815	Chr_UP	14	4.7	Z	n.a.	n.a.
Smp_128800	Chr_2	15473871	31345	Autosome	Chr_2	n.a.	n.a.	n.a.	n.a.	n.a.	n.a.	Sha_scaffold4087	5936	Chr_2	7.5	2.4	Z	n.a.	n.a.
Smp_129980	SC_0037	1972984	9784	Autosome	Chr_UP	n.a.	n.a.	n.a.	n.a.	n.a.	n.a.	Sha_scaffold5100	29474	Chr_UP	16	4.8	Z	n.a.	n.a.
Smp_131640	Chr_2	33636894	58639	Autosome	Chr_2	n.a.	n.a.	n.a.	n.a.	n.a.	n.a.	Sha_scaffold877	112800	Chr_2	16	5	Z	n.a.	n.a.
Smp_136880	Chr_4	26742984	8029	Autosome	Chr_4	n.a.	n.a.	n.a.	n.a.	n.a.	n.a.	Sha_C10147634	2251	Chr_4	14	4.5	Z	n.a.	n.a.
Smp_141020	Chr_1.unplaced.SC_0094	1320689	810	Autosome	Chr_UP	n.a.	n.a.	n.a.	n.a.	n.a.	n.a.	Sha_scaffold6	200389	Chr_Z	13	4.1	Z	n.a.	n.a.
Smp_146490	Chr_ZW	13695909	8135	Autosome	Chr_PSA	n.a.	n.a.	n.a.	n.a.	n.a.	n.a.	Sha_scaffold5242	1284	Chr_PSA	8.1	4.6	Z	n.a.	n.a.
Smp_153210	Chr_ZW	3049119	5573	Autosome	Chr_PSA	n.a.	n.a.	n.a.	n.a.	n.a.	n.a.	Sha_scaffold530	320112	Chr_PSA	14	4.6	Z	n.a.	n.a.
Smp_154450	SC_0306	7499	2854	Autosome	Chr_UP	n.a.	n.a.	n.a.	n.a.	n.a.	n.a.	Sha_scaffold406	20411	Chr_UP	9.3	4	Z	n.a.	n.a.
Smp_154460	Chr_3.unplaced.SC_0083	538299	5624	Autosome	Chr_UP	n.a.	n.a.	n.a.	n.a.	n.a.	n.a.	Sha_scaffold992	68109	Chr_UP	15	5.6	Z	n.a.	n.a.
Smp_155170	Chr_5	8323884	2424	Autosome	Chr_5	n.a.	n.a.	n.a.	n.a.	n.a.	n.a.	Sha_scaffold89	154229	Chr_5	15	5.3	Z	n.a.	n.a.
Smp_155910	Chr_4	17562595	2513	Autosome	Chr_4	n.a.	n.a.	n.a.	n.a.	n.a.	n.a.	Sha_scaffold5294	870	Chr_4	8.2	4.1	Z	n.a.	n.a.
Smp_156090	SC_0229	188812	1115	Autosome	Chr_UP	n.a.	n.a.	n.a.	n.a.	n.a.	n.a.	Sha_scaffold403	272548	Chr_UP	12	4	Z	n.a.	n.a.
Smp_160050	SC_0160	461173	9868	Autosome	Chr_UP	n.a.	n.a.	n.a.	n.a.	n.a.	n.a.	Sha_scaffold918	42256	Chr_UP	16	4.9	Z	n.a.	n.a.
Smp_162420	SC_0144	547030	1359	Autosome	Chr_UP	n.a.	n.a.	n.a.	n.a.	n.a.	n.a.	Sha_scaffold422	1179553	Chr_Z	14	4.4	Z	n.a.	n.a.
Smp_167100	SC_0132	326194	25583	Autosome	Chr_UP	n.a.	n.a.	n.a.	n.a.	n.a.	n.a.	Sha_scaffold1024	41078	Chr_UP	13	5.1	Z	n.a.	n.a.
Smp_167670	Chr_3.unplaced.SC_0044	1814005	461	Autosome	Chr_UP	n.a.	n.a.	n.a.	n.a.	n.a.	n.a.	Sha_scaffold271	336557	Chr_Z	14	4.4	Z	n.a.	n.a.
Smp_168440	SC_0247	36480	522	Autosome	Chr_UP	n.a.	n.a.	n.a.	n.a.	n.a.	n.a.	Sha_scaffold866	16735	Chr_UP	7.9	3.5	Z	n.a.	n.a.
Smp_170840	Chr_6	1337890	2094	Autosome	Chr_6	n.a.	n.a.	n.a.	n.a.	n.a.	n.a.	Sha_scaffold1743	31555	Chr_6	10	3.9	Z	n.a.	n.a.
Smp_174140	Chr_1	21211098	248	Autosome	Chr_1	n.a.	n.a.	n.a.	n.a.	n.a.	n.a.	Sha_C9623390	201	Chr_1	9.5	3	Z	n.a.	n.a.
Smp_178170	Chr_1.unplaced.SC_0094	336798	329	Autosome	Chr_UP	n.a.	n.a.	n.a.	n.a.	n.a.	n.a.	Sha_C9326397	126	Chr_UP	5.8	1.7	Z	n.a.	n.a.
Smp_181430	Chr_3	11064156	275	Autosome	Chr_3	n.a.	n.a.	n.a.	n.a.	n.a.	n.a.	Sha_scaffold998	966843	Chr_Z	13	4.2	Z	n.a.	n.a.
Smp_182880	Chr_1	52219628	866	Autosome	Chr_1	n.a.	n.a.	n.a.	n.a.	n.a.	n.a.	Sha_scaffold1504	506468	Chr_Z	14	4.4	Z	n.a.	n.a.
Smp_186170	SC_0037	1550462	1694	Autosome	Chr_UP	SJC_S026421	3159	Chr_UP	1	1.3	n.a.	Sha_scaffold1870	89605	Chr_UP	12	3.6	Z	n.a.	n.a.
Smp_186660	Chr_2	12030236	233	Autosome	Chr_2	n.a.	n.a.	n.a.	n.a.	n.a.	n.a.	Sha_C9746852	288	Chr_2	4.6	2.7	Z	n.a.	n.a.
Smp_190210	SC_0176	6257	206	Autosome	Chr_UP	n.a.	n.a.	n.a.	n.a.	n.a.	n.a.	Sha_scaffold1088	16559	Chr_UP	13	5.4	Z	n.a.	n.a.
Smp_193320	SC_0176	11893	284	Autosome	Chr_UP	n.a.	n.a.	n.a.	n.a.	n.a.	n.a.	Sha_scaffold866	16735	Chr_UP	7.9	3.5	Z	n.a.	n.a.
Smp_193380	SC_0134	777221	5359	Autosome	Chr_UP	n.a.	n.a.	n.a.	n.a.	n.a.	n.a.	Sha_scaffold1986	75792	Chr_UP	12	4	Z	n.a.	n.a.
Smp_195080	SC_0166	555822	528	Autosome	Chr_UP	n.a.	n.a.	n.a.	n.a.	n.a.	n.a.	Sha_C9934203	606	Chr_UP	9.4	2.9	Z	n.a.	n.a.
Smp_201240	Chr_1.unplaced.SC_0071	626775	182	Autosome	Chr_UP	n.a.	n.a.	n.a.	n.a.	n.a.	n.a.	Sha_scaffold951	319925	Chr_Z	14	4.3	Z	n.a.	n.a.
Smp_202010	Chr_3	6722940	248	Autosome	Chr_3	n.a.	n.a.	n.a.	n.a.	n.a.	n.a.	Sha_scaffold250	130469	Chr_Z	15	4.5	Z	n.a.	n.a.
Smp_202310	Chr_3.unplaced.SC_0044	1922417	242	Autosome	Chr_UP	n.a.	n.a.	n.a.	n.a.	n.a.	n.a.	Sha_scaffold531	917805	Chr_Z	14	4.3	Z	n.a.	n.a.
Smp_202320	Chr_3.unplaced.SC_0077	800846	1189	Autosome	Chr_UP	n.a.	n.a.	n.a.	n.a.	n.a.	n.a.	Sha_scaffold4119	28658	Chr_UP	8.1	3.9	Z	n.a.	n.a.
Smp_202620	Chr_4	28301572	155	Autosome	Chr_4	n.a.	n.a.	n.a.	n.a.	n.a.	n.a.	Sha_scaffold998	966843	Chr_Z	13	4.2	Z	n.a.	n.a.
Smp_202700	Chr_4	17255653	3424	Autosome	Chr_4	n.a.	n.a.	n.a.	n.a.	n.a.	n.a.	Sha_scaffold128	342583	Chr_4	12	4.5	Z	n.a.	n.a.
Smp_202840	Chr_5	7614378	7656	Autosome	Chr_5	n.a.	n.a.	n.a.	n.a.	n.a.	n.a.	Sha_scaffold302	35774	Chr_5	10	3.9	Z	n.a.	n.a.
Smp_203670	Chr_ZW	31569076	209	Autosome	Chr_PSA	n.a.	n.a.	n.a.	n.a.	n.a.	n.a.	Sha_scaffold5220	7640	Chr_PSA	13	4.3	Z	n.a.	n.a.
Smp_204290	Chr_ZW	55846769	233	Autosome	Chr_PSA	n.a.	n.a.	n.a.	n.a.	n.a.	n.a.	Sha_scaffold1415	36781	Chr_PSA	14	4.6	Z	n.a.	n.a.
Smp_204650	SC_0137	442244	287	Autosome	Chr_UP	n.a.	n.a.	n.a.	n.a.	n.a.	n.a.	Sha_scaffold1300	379407	Chr_newZ	15	4.6	Z	n.a.	n.a.
Smp_212520	Chr_3.unplaced.SC_0083	1178520	4376	Autosome	Chr_UP	n.a.	n.a.	n.a.	n.a.	n.a.	n.a.	Sha_scaffold992	68109	Chr_UP	15	5.6	Z	n.a.	n.a.
rajko.90nt.slRNA-3.1.1	SC_0142	709962	88	Autosome	Chr_UP	n.a.	n.a.	n.a.	n.a.	n.a.	n.a.	n.a.	n.a.	n.a.	n.a.	n.a.	n.a.	n.a.	n.a.
rajko.90nt.slRNA-31.1.1	SC_0142	709448	88	Autosome	Chr_UP	n.a.	n.a.	n.a.	n.a.	n.a.	n.a.	n.a.	n.a.	n.a.	n.a.	n.a.	n.a.	n.a.	n.a.
rajko.90nt.slRNA-39.1.1	SC_0142	709447	88	Autosome	Chr_UP	n.a.	n.a.	n.a.	n.a.	n.a.	n.a.	n.a.	n.a.	n.a.	n.a.	n.a.	n.a.	n.a.	n.a.
rajko.90nt.slRNA-41.1.1	SC_0142	808573	3	Autosome	Chr_UP	n.a.	n.a.	n.a.	n.a.	n.a.	n.a.	n.a.	n.a.	n.a.	n.a.	n.a.	n.a.	n.a.	n.a.
rajko.90nt.slRNA-45.1.1	Chr_ZW	44770565	90	Autosome	Chr_PSA	n.a.	n.a.	n.a.	n.a.	n.a.	n.a.	n.a.	n.a.	n.a.	n.a.	n.a.	n.a.	n.a.	n.a.
rajko.90nt.slRNA-46.1.1	Chr_ZW	44771168	88	Autosome	Chr_PSA	n.a.	n.a.	n.a.	n.a.	n.a.	n.a.	n.a.	n.a.	n.a.	n.a.	n.a.	n.a.	n.a.	n.a.
rajko.90nt.slRNA-5.1.1	Chr_ZW	44771169	88	Autosome	Chr_PSA	n.a.	n.a.	n.a.	n.a.	n.a.	n.a.	n.a.	n.a.	n.a.	n.a.	n.a.	n.a.	n.a.	n.a.
SM-001-1.1.1	Chr_4	15507268	67	Autosome	Chr_4	n.a.	n.a.	n.a.	n.a.	n.a.	n.a.	n.a.	n.a.	n.a.	n.a.	n.a.	n.a.	n.a.	n.a.
SM-124-1_1_1	Chr_6	18429530	85	Autosome	Chr_6	n.a.	n.a.	n.a.	n.a.	n.a.	n.a.	n.a.	n.a.	n.a.	n.a.	n.a.	n.a.	n.a.	n.a.
sma-mir-2a-2.1.1	Chr_2	7720655	93	Autosome	Chr_2	n.a.	n.a.	n.a.	n.a.	n.a.	n.a.	n.a.	n.a.	n.a.	n.a.	n.a.	n.a.	n.a.	n.a.
sma.18s-10.1	Chr_2.unplaced.SC_0332	27661	983	Autosome	Chr_UP	n.a.	n.a.	n.a.	n.a.	n.a.	n.a.	n.a.	n.a.	n.a.	n.a.	n.a.	n.a.	n.a.	n.a.
sma.18s-13.1	Chr_2.unplaced.SC_0332	1342	1829	Autosome	Chr_UP	n.a.	n.a.	n.a.	n.a.	n.a.	n.a.	n.a.	n.a.	n.a.	n.a.	n.a.	n.a.	n.a.	n.a.
sma.18s-18.1	Chr_ZW.unplaced.SC_0272	13413	1971	Autosome	Chr_UP	n.a.	n.a.	n.a.	n.a.	n.a.	n.a.	n.a.	n.a.	n.a.	n.a.	n.a.	n.a.	n.a.	n.a.
sma.18s-25.1	Chr_1.unplaced.SC_0076	1212569	1967	Autosome	Chr_UP	n.a.	n.a.	n.a.	n.a.	n.a.	n.a.	n.a.	n.a.	n.a.	n.a.	n.a.	n.a.	n.a.	n.a.
sma.18s-53.1	Chr_1	39930966	1972	Autosome	Chr_1	n.a.	n.a.	n.a.	n.a.	n.a.	n.a.	n.a.	n.a.	n.a.	n.a.	n.a.	n.a.	n.a.	n.a.
sma.18s-54.1	Chr_1	39930903	1969	Autosome	Chr_1	n.a.	n.a.	n.a.	n.a.	n.a.	n.a.	n.a.	n.a.	n.a.	n.a.	n.a.	n.a.	n.a.	n.a.
sma.18s-58.1	SC_0236	4101	1734	Autosome	Chr_UP	n.a.	n.a.	n.a.	n.a.	n.a.	n.a.	n.a.	n.a.	n.a.	n.a.	n.a.	n.a.	n.a.	n.a.
sma.18s-66.1	Chr_2.unplaced.SC_0332	37606	633	Autosome	Chr_UP	n.a.	n.a.	n.a.	n.a.	n.a.	n.a.	n.a.	n.a.	n.a.	n.a.	n.a.	n.a.	n.a.	n.a.
sma.18s-74.1	Chr_2.unplaced.SC_0332	12350	452	Autosome	Chr_UP	n.a.	n.a.	n.a.	n.a.	n.a.	n.a.	n.a.	n.a.	n.a.	n.a.	n.a.	n.a.	n.a.	n.a.
sma.18s-8.1	Chr_2.unplaced.SC_0332	26981	1663	Autosome	Chr_UP	n.a.	n.a.	n.a.	n.a.	n.a.	n.a.	n.a.	n.a.	n.a.	n.a.	n.a.	n.a.	n.a.	n.a.
sma.18s.1	Chr_2.unplaced.SC_0332	26674	1972	Autosome	Chr_UP	n.a.	n.a.	n.a.	n.a.	n.a.	n.a.	n.a.	n.a.	n.a.	n.a.	n.a.	n.a.	n.a.	n.a.
sma.28s-18.1	Chr_2.unplaced.SC_0332	29389	1692	Autosome	Chr_UP	n.a.	n.a.	n.a.	n.a.	n.a.	n.a.	n.a.	n.a.	n.a.	n.a.	n.a.	n.a.	n.a.	n.a.
sma.28s-25.1	Chr_1.unplaced.SC_0076	1210131	1694	Autosome	Chr_UP	n.a.	n.a.	n.a.	n.a.	n.a.	n.a.	n.a.	n.a.	n.a.	n.a.	n.a.	n.a.	n.a.	n.a.
sma.28s-5.1	Chr_2.unplaced.SC_0213	47790	1693	Autosome	Chr_UP	n.a.	n.a.	n.a.	n.a.	n.a.	n.a.	n.a.	n.a.	n.a.	n.a.	n.a.	n.a.	n.a.	n.a.
sma.28s-6.1	Chr_2.unplaced.SC_0213	913	1694	Autosome	Chr_UP	n.a.	n.a.	n.a.	n.a.	n.a.	n.a.	n.a.	n.a.	n.a.	n.a.	n.a.	n.a.	n.a.	n.a.
sma.28s-95.1	SC_0062	1036985	1692	Autosome	Chr_UP	n.a.	n.a.	n.a.	n.a.	n.a.	n.a.	n.a.	n.a.	n.a.	n.a.	n.a.	n.a.	n.a.	n.a.
sma.28s-96.1	SC_0062	1037539	1693	Autosome	Chr_UP	n.a.	n.a.	n.a.	n.a.	n.a.	n.a.	n.a.	n.a.	n.a.	n.a.	n.a.	n.a.	n.a.	n.a.
sma.5.8s-107.1	Chr_5	3010690	153	Autosome	Chr_5	n.a.	n.a.	n.a.	n.a.	n.a.	n.a.	n.a.	n.a.	n.a.	n.a.	n.a.	n.a.	n.a.	n.a.
sma.5.8s-114.1	SC_0062	1036720	153	Autosome	Chr_UP	n.a.	n.a.	n.a.	n.a.	n.a.	n.a.	n.a.	n.a.	n.a.	n.a.	n.a.	n.a.	n.a.	n.a.
sma.5.8s-13.1	Chr_2.unplaced.SC_0332	3650	153	Autosome	Chr_UP	n.a.	n.a.	n.a.	n.a.	n.a.	n.a.	n.a.	n.a.	n.a.	n.a.	n.a.	n.a.	n.a.	n.a.
sma.5.8s-20.1	Chr_2.unplaced.SC_0213	646	153	Autosome	Chr_UP	n.a.	n.a.	n.a.	n.a.	n.a.	n.a.	n.a.	n.a.	n.a.	n.a.	n.a.	n.a.	n.a.	n.a.
sma.5.8s-23.1	SC_0062	1036718	153	Autosome	Chr_UP	n.a.	n.a.	n.a.	n.a.	n.a.	n.a.	n.a.	n.a.	n.a.	n.a.	n.a.	n.a.	n.a.	n.a.
sma.5.8s-24.1	Chr_1.unplaced.SC_0076	1211937	153	Autosome	Chr_UP	n.a.	n.a.	n.a.	n.a.	n.a.	n.a.	n.a.	n.a.	n.a.	n.a.	n.a.	n.a.	n.a.	n.a.
sma.5.8s-45.1	Chr_1.unplaced.SC_0076	1211935	153	Autosome	Chr_UP	n.a.	n.a.	n.a.	n.a.	n.a.	n.a.	n.a.	n.a.	n.a.	n.a.	n.a.	n.a.	n.a.	n.a.
sma.5.8s-5.1	Chr_2.unplaced.SC_0213	648	153	Autosome	Chr_UP	n.a.	n.a.	n.a.	n.a.	n.a.	n.a.	n.a.	n.a.	n.a.	n.a.	n.a.	n.a.	n.a.	n.a.
sma.5.8s-57.1	Chr_2.unplaced.SC_0332	3648	153	Autosome	Chr_UP	n.a.	n.a.	n.a.	n.a.	n.a.	n.a.	n.a.	n.a.	n.a.	n.a.	n.a.	n.a.	n.a.	n.a.
sma.5.8s-58.1	Chr_2.unplaced.SC_0332	29129	146	Autosome	Chr_UP	n.a.	n.a.	n.a.	n.a.	n.a.	n.a.	n.a.	n.a.	n.a.	n.a.	n.a.	n.a.	n.a.	n.a.
sma.5.8s-6.1	Chr_2.unplaced.SC_0213	47525	153	Autosome	Chr_UP	n.a.	n.a.	n.a.	n.a.	n.a.	n.a.	n.a.	n.a.	n.a.	n.a.	n.a.	n.a.	n.a.	n.a.
sma.5.8s-81.1	Chr_2.unplaced.SC_0332	38716	153	Autosome	Chr_UP	n.a.	n.a.	n.a.	n.a.	n.a.	n.a.	n.a.	n.a.	n.a.	n.a.	n.a.	n.a.	n.a.	n.a.
sma.5.8s-9.1	Chr_2.unplaced.SC_0332	29122	153	Autosome	Chr_UP	n.a.	n.a.	n.a.	n.a.	n.a.	n.a.	n.a.	n.a.	n.a.	n.a.	n.a.	n.a.	n.a.	n.a.
sma.5.8s-90.1	Chr_2.unplaced.SC_0332	38718	153	Autosome	Chr_UP	n.a.	n.a.	n.a.	n.a.	n.a.	n.a.	n.a.	n.a.	n.a.	n.a.	n.a.	n.a.	n.a.	n.a.
sma.5.8s.1	Chr_2.unplaced.SC_0332	29125	152	Autosome	Chr_UP	n.a.	n.a.	n.a.	n.a.	n.a.	n.a.	n.a.	n.a.	n.a.	n.a.	n.a.	n.a.	n.a.	n.a.
sma.5s-14.1	Chr_5	877979	116	Autosome	Chr_5	n.a.	n.a.	n.a.	n.a.	n.a.	n.a.	n.a.	n.a.	n.a.	n.a.	n.a.	n.a.	n.a.	n.a.
sma.5s-18.1	Chr_3.unplaced.SC_0105	547682	116	Autosome	Chr_UP	n.a.	n.a.	n.a.	n.a.	n.a.	n.a.	n.a.	n.a.	n.a.	n.a.	n.a.	n.a.	n.a.	n.a.
sma.5s-19.1	Chr_4	31561221	116	Autosome	Chr_4	n.a.	n.a.	n.a.	n.a.	n.a.	n.a.	n.a.	n.a.	n.a.	n.a.	n.a.	n.a.	n.a.	n.a.
sma.5s-20.1	SC_0154	582104	116	Autosome	Chr_UP	n.a.	n.a.	n.a.	n.a.	n.a.	n.a.	n.a.	n.a.	n.a.	n.a.	n.a.	n.a.	n.a.	n.a.
sma.5s-5.1	Chr_2	8722302	116	Autosome	Chr_2	n.a.	n.a.	n.a.	n.a.	n.a.	n.a.	n.a.	n.a.	n.a.	n.a.	n.a.	n.a.	n.a.	n.a.
sma.MAYBE.7sk.1.1	Chr_2	25371083	254	Autosome	Chr_2	n.a.	n.a.	n.a.	n.a.	n.a.	n.a.	n.a.	n.a.	n.a.	n.a.	n.a.	n.a.	n.a.	n.a.
sma.MAYBE.mrp.1.1	Chr_4	27389454	334	Autosome	Chr_4	n.a.	n.a.	n.a.	n.a.	n.a.	n.a.	n.a.	n.a.	n.a.	n.a.	n.a.	n.a.	n.a.	n.a.
sma.rnase_p-1.1.1	SC_0041	1323641	293	Autosome	Chr_UP	n.a.	n.a.	n.a.	n.a.	n.a.	n.a.	n.a.	n.a.	n.a.	n.a.	n.a.	n.a.	n.a.	n.a.
sma.rnase_p.1.1	SC_0041	1366565	293	Autosome	Chr_UP	n.a.	n.a.	n.a.	n.a.	n.a.	n.a.	n.a.	n.a.	n.a.	n.a.	n.a.	n.a.	n.a.	n.a.
sma.U1-1.1.1	Chr_1	12013238	158	Autosome	Chr_1	n.a.	n.a.	n.a.	n.a.	n.a.	n.a.	n.a.	n.a.	n.a.	n.a.	n.a.	n.a.	n.a.	n.a.
sma.U1.1.1	Chr_2	11581663	158	Autosome	Chr_2	n.a.	n.a.	n.a.	n.a.	n.a.	n.a.	n.a.	n.a.	n.a.	n.a.	n.a.	n.a.	n.a.	n.a.
sma.U11.1.1	Chr_ZW	21304708	115	Autosome	Chr_PSA	n.a.	n.a.	n.a.	n.a.	n.a.	n.a.	n.a.	n.a.	n.a.	n.a.	n.a.	n.a.	n.a.	n.a.
sma.U12.1.1	Chr_1.unplaced.SC_0010	413639	140	Autosome	Chr_UP	n.a.	n.a.	n.a.	n.a.	n.a.	n.a.	n.a.	n.a.	n.a.	n.a.	n.a.	n.a.	n.a.	n.a.
sma.U4atac.1.1	Chr_6	14260692	129	Autosome	Chr_6	n.a.	n.a.	n.a.	n.a.	n.a.	n.a.	n.a.	n.a.	n.a.	n.a.	n.a.	n.a.	n.a.	n.a.
sma.U5-1.1.1	SC_0041	1621835	116	Autosome	Chr_UP	n.a.	n.a.	n.a.	n.a.	n.a.	n.a.	n.a.	n.a.	n.a.	n.a.	n.a.	n.a.	n.a.	n.a.
sma.U5.1.1	Chr_6	17344669	116	Autosome	Chr_6	n.a.	n.a.	n.a.	n.a.	n.a.	n.a.	n.a.	n.a.	n.a.	n.a.	n.a.	n.a.	n.a.	n.a.
sma.U6-4.1.1	Chr_3.unplaced.SC_0141	60903	105	Autosome	Chr_UP	n.a.	n.a.	n.a.	n.a.	n.a.	n.a.	n.a.	n.a.	n.a.	n.a.	n.a.	n.a.	n.a.	n.a.
sma.U6-7.1.1	Chr_ZW	36182992	105	Autosome	Chr_PSA	n.a.	n.a.	n.a.	n.a.	n.a.	n.a.	n.a.	n.a.	n.a.	n.a.	n.a.	n.a.	n.a.	n.a.
sma.U6-8.1.1	Chr_1	62797778	105	Autosome	Chr_1	n.a.	n.a.	n.a.	n.a.	n.a.	n.a.	n.a.	n.a.	n.a.	n.a.	n.a.	n.a.	n.a.	n.a.
sma.U6.1.1	Chr_3	18425131	105	Autosome	Chr_3	n.a.	n.a.	n.a.	n.a.	n.a.	n.a.	n.a.	n.a.	n.a.	n.a.	n.a.	n.a.	n.a.	n.a.
sma.U6atac.1.1	Chr_2	18476304	110	Autosome	Chr_2	n.a.	n.a.	n.a.	n.a.	n.a.	n.a.	n.a.	n.a.	n.a.	n.a.	n.a.	n.a.	n.a.	n.a.
Smp_000250	Chr_3.unplaced.SC_0044	510204	3472	Autosome	Chr_UP	n.a.	n.a.	n.a.	n.a.	n.a.	n.a.	n.a.	n.a.	n.a.	n.a.	n.a.	n.a.	n.a.	n.a.
Smp_000400	SC_0113	868615	817	Autosome	Chr_UP	n.a.	n.a.	n.a.	n.a.	n.a.	n.a.	n.a.	n.a.	n.a.	n.a.	n.a.	n.a.	n.a.	n.a.
Smp_000550	SC_0113	453890	8809	Autosome	Chr_UP	n.a.	n.a.	n.a.	n.a.	n.a.	n.a.	n.a.	n.a.	n.a.	n.a.	n.a.	n.a.	n.a.	n.a.
Smp_000610	SC_0113	304891	8714	Autosome	Chr_UP	n.a.	n.a.	n.a.	n.a.	n.a.	n.a.	n.a.	n.a.	n.a.	n.a.	n.a.	n.a.	n.a.	n.a.
Smp_000770	Chr_1	65267837	1100	Autosome	Chr_1	n.a.	n.a.	n.a.	n.a.	n.a.	n.a.	n.a.	n.a.	n.a.	n.a.	n.a.	n.a.	n.a.	n.a.
Smp_002390	Chr_2.unplaced.SC_0171	223665	554	Autosome	Chr_UP	n.a.	n.a.	n.a.	n.a.	n.a.	n.a.	n.a.	n.a.	n.a.	n.a.	n.a.	n.a.	n.a.	n.a.
Smp_002470	Chr_3	15319150	314	Autosome	Chr_3	n.a.	n.a.	n.a.	n.a.	n.a.	n.a.	n.a.	n.a.	n.a.	n.a.	n.a.	n.a.	n.a.	n.a.
Smp_002500	Chr_3	15284439	308	Autosome	Chr_3	n.a.	n.a.	n.a.	n.a.	n.a.	n.a.	n.a.	n.a.	n.a.	n.a.	n.a.	n.a.	n.a.	n.a.
Smp_002630	Chr_3	24185015	1903	Autosome	Chr_3	n.a.	n.a.	n.a.	n.a.	n.a.	n.a.	n.a.	n.a.	n.a.	n.a.	n.a.	n.a.	n.a.	n.a.
Smp_004230	Chr_1	50178847	317	Autosome	Chr_1	n.a.	n.a.	n.a.	n.a.	n.a.	n.a.	n.a.	n.a.	n.a.	n.a.	n.a.	n.a.	n.a.	n.a.
Smp_004530	SC_0037	134968	317	Autosome	Chr_UP	n.a.	n.a.	n.a.	n.a.	n.a.	n.a.	n.a.	n.a.	n.a.	n.a.	n.a.	n.a.	n.a.	n.a.
Smp_005170	Chr_1	32770616	236	Autosome	Chr_1	n.a.	n.a.	n.a.	n.a.	n.a.	n.a.	n.a.	n.a.	n.a.	n.a.	n.a.	n.a.	n.a.	n.a.
Smp_005670	SC_0148	190660	7287	Autosome	Chr_UP	n.a.	n.a.	n.a.	n.a.	n.a.	n.a.	n.a.	n.a.	n.a.	n.a.	n.a.	n.a.	n.a.	n.a.
Smp_008390	Chr_1	40454269	606	Autosome	Chr_1	n.a.	n.a.	n.a.	n.a.	n.a.	n.a.	n.a.	n.a.	n.a.	n.a.	n.a.	n.a.	n.a.	n.a.
Smp_008640	SC_0211	149145	92	Autosome	Chr_UP	n.a.	n.a.	n.a.	n.a.	n.a.	n.a.	n.a.	n.a.	n.a.	n.a.	n.a.	n.a.	n.a.	n.a.
Smp_009340	Chr_6	18093796	4968	Autosome	Chr_6	n.a.	n.a.	n.a.	n.a.	n.a.	n.a.	n.a.	n.a.	n.a.	n.a.	n.a.	n.a.	n.a.	n.a.
Smp_010550	Chr_7	1704808	16748	Autosome	Chr_7	n.a.	n.a.	n.a.	n.a.	n.a.	n.a.	n.a.	n.a.	n.a.	n.a.	n.a.	n.a.	n.a.	n.a.
Smp_010850	Chr_4	14745160	1392	Autosome	Chr_4	n.a.	n.a.	n.a.	n.a.	n.a.	n.a.	n.a.	n.a.	n.a.	n.a.	n.a.	n.a.	n.a.	n.a.
Smp_012560	Chr_4	30704613	11375	Autosome	Chr_4	n.a.	n.a.	n.a.	n.a.	n.a.	n.a.	n.a.	n.a.	n.a.	n.a.	n.a.	n.a.	n.a.	n.a.
Smp_014430	SC_0037	1933801	3667	Autosome	Chr_UP	n.a.	n.a.	n.a.	n.a.	n.a.	n.a.	n.a.	n.a.	n.a.	n.a.	n.a.	n.a.	n.a.	n.a.
Smp_018510	Chr_3	3626442	3871	Autosome	Chr_3	n.a.	n.a.	n.a.	n.a.	n.a.	n.a.	n.a.	n.a.	n.a.	n.a.	n.a.	n.a.	n.a.	n.a.
Smp_018800	Chr_3	23573831	4135	Autosome	Chr_3	n.a.	n.a.	n.a.	n.a.	n.a.	n.a.	n.a.	n.a.	n.a.	n.a.	n.a.	n.a.	n.a.	n.a.
Smp_018880	Chr_3	23864818	3010	Autosome	Chr_3	n.a.	n.a.	n.a.	n.a.	n.a.	n.a.	n.a.	n.a.	n.a.	n.a.	n.a.	n.a.	n.a.	n.a.
Smp_019460	Chr_1.unplaced.SC_0010	1182584	5142	Autosome	Chr_UP	n.a.	n.a.	n.a.	n.a.	n.a.	n.a.	n.a.	n.a.	n.a.	n.a.	n.a.	n.a.	n.a.	n.a.
Smp_020460	SC_0169	24215	491	Autosome	Chr_UP	n.a.	n.a.	n.a.	n.a.	n.a.	n.a.	n.a.	n.a.	n.a.	n.a.	n.a.	n.a.	n.a.	n.a.
Smp_023140	Chr_2	17070213	2731	Autosome	Chr_2	n.a.	n.a.	n.a.	n.a.	n.a.	n.a.	n.a.	n.a.	n.a.	n.a.	n.a.	n.a.	n.a.	n.a.
Smp_025390	Chr_ZW	35748808	3188	Autosome	Chr_PSA	n.a.	n.a.	n.a.	n.a.	n.a.	n.a.	n.a.	n.a.	n.a.	n.a.	n.a.	n.a.	n.a.	n.a.
Smp_025690	Chr_1	29095379	6695	Autosome	Chr_1	n.a.	n.a.	n.a.	n.a.	n.a.	n.a.	n.a.	n.a.	n.a.	n.a.	n.a.	n.a.	n.a.	n.a.
Smp_026100	Chr_5	214119	567	Autosome	Chr_5	n.a.	n.a.	n.a.	n.a.	n.a.	n.a.	n.a.	n.a.	n.a.	n.a.	n.a.	n.a.	n.a.	n.a.
Smp_026450	Chr_ZW	55339688	108539	Autosome	Chr_PSA	n.a.	n.a.	n.a.	n.a.	n.a.	n.a.	n.a.	n.a.	n.a.	n.a.	n.a.	n.a.	n.a.	n.a.
Smp_026860	Chr_1.unplaced.SC_0071	483954	515	Autosome	Chr_UP	n.a.	n.a.	n.a.	n.a.	n.a.	n.a.	n.a.	n.a.	n.a.	n.a.	n.a.	n.a.	n.a.	n.a.
Smp_026880	Chr_3	22865502	14291	Autosome	Chr_3	n.a.	n.a.	n.a.	n.a.	n.a.	n.a.	n.a.	n.a.	n.a.	n.a.	n.a.	n.a.	n.a.	n.a.
Smp_027580	Chr_4	6754989	131	Autosome	Chr_4	n.a.	n.a.	n.a.	n.a.	n.a.	n.a.	n.a.	n.a.	n.a.	n.a.	n.a.	n.a.	n.a.	n.a.
Smp_029070	Chr_3	5125524	7775	Autosome	Chr_3	n.a.	n.a.	n.a.	n.a.	n.a.	n.a.	n.a.	n.a.	n.a.	n.a.	n.a.	n.a.	n.a.	n.a.
Smp_032120	SC_0125	463448	1741	Autosome	Chr_UP	n.a.	n.a.	n.a.	n.a.	n.a.	n.a.	n.a.	n.a.	n.a.	n.a.	n.a.	n.a.	n.a.	n.a.
Smp_032370	Chr_ZW	51466832	2950	Autosome	Chr_PSA	n.a.	n.a.	n.a.	n.a.	n.a.	n.a.	n.a.	n.a.	n.a.	n.a.	n.a.	n.a.	n.a.	n.a.
Smp_032470	Chr_ZW	51077274	251	Autosome	Chr_PSA	n.a.	n.a.	n.a.	n.a.	n.a.	n.a.	n.a.	n.a.	n.a.	n.a.	n.a.	n.a.	n.a.	n.a.
Smp_033440	Chr_7	3914452	56	Autosome	Chr_7	n.a.	n.a.	n.a.	n.a.	n.a.	n.a.	n.a.	n.a.	n.a.	n.a.	n.a.	n.a.	n.a.	n.a.
Smp_033530	Chr_ZW	13406839	3727	Autosome	Chr_PSA	n.a.	n.a.	n.a.	n.a.	n.a.	n.a.	n.a.	n.a.	n.a.	n.a.	n.a.	n.a.	n.a.	n.a.
Smp_034580	Chr_1	20280157	4548	Autosome	Chr_1	n.a.	n.a.	n.a.	n.a.	n.a.	n.a.	n.a.	n.a.	n.a.	n.a.	n.a.	n.a.	n.a.	n.a.
Smp_038960	Chr_ZW	43636759	1446	Autosome	Chr_PSA	n.a.	n.a.	n.a.	n.a.	n.a.	n.a.	n.a.	n.a.	n.a.	n.a.	n.a.	n.a.	n.a.	n.a.
Smp_039010	Chr_5.unplaced.SC_0198	299239	446	Autosome	Chr_UP	n.a.	n.a.	n.a.	n.a.	n.a.	n.a.	n.a.	n.a.	n.a.	n.a.	n.a.	n.a.	n.a.	n.a.
Smp_043300	Chr_4	13641082	1568	Autosome	Chr_4	n.a.	n.a.	n.a.	n.a.	n.a.	n.a.	n.a.	n.a.	n.a.	n.a.	n.a.	n.a.	n.a.	n.a.
Smp_045490	Chr_4	4611818	13650	Autosome	Chr_4	n.a.	n.a.	n.a.	n.a.	n.a.	n.a.	n.a.	n.a.	n.a.	n.a.	n.a.	n.a.	n.a.	n.a.
Smp_046040	Chr_ZW	37287782	50	Autosome	Chr_PSA	n.a.	n.a.	n.a.	n.a.	n.a.	n.a.	n.a.	n.a.	n.a.	n.a.	n.a.	n.a.	n.a.	n.a.
Smp_046180	Chr_2	32839194	1048	Autosome	Chr_2	n.a.	n.a.	n.a.	n.a.	n.a.	n.a.	n.a.	n.a.	n.a.	n.a.	n.a.	n.a.	n.a.	n.a.
Smp_046780	Chr_2	20209163	788	Autosome	Chr_2	n.a.	n.a.	n.a.	n.a.	n.a.	n.a.	n.a.	n.a.	n.a.	n.a.	n.a.	n.a.	n.a.	n.a.
Smp_047680	Chr_2	8424075	998	Autosome	Chr_2	n.a.	n.a.	n.a.	n.a.	n.a.	n.a.	n.a.	n.a.	n.a.	n.a.	n.a.	n.a.	n.a.	n.a.
Smp_048050	Chr_1	48987956	1925	Autosome	Chr_1	n.a.	n.a.	n.a.	n.a.	n.a.	n.a.	n.a.	n.a.	n.a.	n.a.	n.a.	n.a.	n.a.	n.a.
Smp_052430	Chr_6	10370923	17	Autosome	Chr_6	n.a.	n.a.	n.a.	n.a.	n.a.	n.a.	n.a.	n.a.	n.a.	n.a.	n.a.	n.a.	n.a.	n.a.
Smp_052460	Chr_4	30697908	412	Autosome	Chr_4	n.a.	n.a.	n.a.	n.a.	n.a.	n.a.	n.a.	n.a.	n.a.	n.a.	n.a.	n.a.	n.a.	n.a.
Smp_052630	SC_0134	709328	17645	Autosome	Chr_UP	n.a.	n.a.	n.a.	n.a.	n.a.	n.a.	n.a.	n.a.	n.a.	n.a.	n.a.	n.a.	n.a.	n.a.
Smp_054360	Chr_ZW	41343853	1796	Autosome	Chr_PSA	n.a.	n.a.	n.a.	n.a.	n.a.	n.a.	n.a.	n.a.	n.a.	n.a.	n.a.	n.a.	n.a.	n.a.
Smp_054440	Chr_ZW	41204682	305	Autosome	Chr_PSA	n.a.	n.a.	n.a.	n.a.	n.a.	n.a.	n.a.	n.a.	n.a.	n.a.	n.a.	n.a.	n.a.	n.a.
Smp_055850	SC_0258	115622	2212	Autosome	Chr_UP	n.a.	n.a.	n.a.	n.a.	n.a.	n.a.	n.a.	n.a.	n.a.	n.a.	n.a.	n.a.	n.a.	n.a.
Smp_056420	Chr_ZW	22654113	233	Autosome	Chr_PSA	n.a.	n.a.	n.a.	n.a.	n.a.	n.a.	n.a.	n.a.	n.a.	n.a.	n.a.	n.a.	n.a.	n.a.
Smp_058200	Chr_1	11854447	237	Autosome	Chr_1	n.a.	n.a.	n.a.	n.a.	n.a.	n.a.	n.a.	n.a.	n.a.	n.a.	n.a.	n.a.	n.a.	n.a.
Smp_058700	SC_0013	583343	816	Autosome	Chr_UP	n.a.	n.a.	n.a.	n.a.	n.a.	n.a.	n.a.	n.a.	n.a.	n.a.	n.a.	n.a.	n.a.	n.a.
Smp_059400	Chr_4	4818687	760	Autosome	Chr_4	n.a.	n.a.	n.a.	n.a.	n.a.	n.a.	n.a.	n.a.	n.a.	n.a.	n.a.	n.a.	n.a.	n.a.
Smp_060760	Chr_1	52755853	377	Autosome	Chr_1	n.a.	n.a.	n.a.	n.a.	n.a.	n.a.	n.a.	n.a.	n.a.	n.a.	n.a.	n.a.	n.a.	n.a.
Smp_061500	Chr_5	8693642	629	Autosome	Chr_5	n.a.	n.a.	n.a.	n.a.	n.a.	n.a.	n.a.	n.a.	n.a.	n.a.	n.a.	n.a.	n.a.	n.a.
Smp_062120	SC_0154	249416	6868	Autosome	Chr_UP	n.a.	n.a.	n.a.	n.a.	n.a.	n.a.	n.a.	n.a.	n.a.	n.a.	n.a.	n.a.	n.a.	n.a.
Smp_062240	Chr_2.unplaced.SC_0213	150454	590	Autosome	Chr_UP	n.a.	n.a.	n.a.	n.a.	n.a.	n.a.	n.a.	n.a.	n.a.	n.a.	n.a.	n.a.	n.a.	n.a.
Smp_063550	Chr_1	54692805	248	Autosome	Chr_1	n.a.	n.a.	n.a.	n.a.	n.a.	n.a.	n.a.	n.a.	n.a.	n.a.	n.a.	n.a.	n.a.	n.a.
Smp_063790	SC_0203	369305	350	Autosome	Chr_UP	n.a.	n.a.	n.a.	n.a.	n.a.	n.a.	n.a.	n.a.	n.a.	n.a.	n.a.	n.a.	n.a.	n.a.
Smp_067050	Chr_1	962831	56	Autosome	Chr_1	n.a.	n.a.	n.a.	n.a.	n.a.	n.a.	n.a.	n.a.	n.a.	n.a.	n.a.	n.a.	n.a.	n.a.
Smp_067990	SC_0167	480817	1349	Autosome	Chr_UP	n.a.	n.a.	n.a.	n.a.	n.a.	n.a.	n.a.	n.a.	n.a.	n.a.	n.a.	n.a.	n.a.	n.a.
Smp_070250	Chr_6	13075257	4386	Autosome	Chr_6	n.a.	n.a.	n.a.	n.a.	n.a.	n.a.	n.a.	n.a.	n.a.	n.a.	n.a.	n.a.	n.a.	n.a.
Smp_070390	Chr_1	24786912	3304	Autosome	Chr_1	n.a.	n.a.	n.a.	n.a.	n.a.	n.a.	n.a.	n.a.	n.a.	n.a.	n.a.	n.a.	n.a.	n.a.
Smp_070810	Chr_3	10564429	1000	Autosome	Chr_3	n.a.	n.a.	n.a.	n.a.	n.a.	n.a.	n.a.	n.a.	n.a.	n.a.	n.a.	n.a.	n.a.	n.a.
Smp_071290	SC_0241	160900	198	Autosome	Chr_UP	n.a.	n.a.	n.a.	n.a.	n.a.	n.a.	n.a.	n.a.	n.a.	n.a.	n.a.	n.a.	n.a.	n.a.
Smp_072670	SC_0049	751237	293	Autosome	Chr_UP	n.a.	n.a.	n.a.	n.a.	n.a.	n.a.	n.a.	n.a.	n.a.	n.a.	n.a.	n.a.	n.a.	n.a.
Smp_073820	Chr_1	39931383	347	Autosome	Chr_1	n.a.	n.a.	n.a.	n.a.	n.a.	n.a.	n.a.	n.a.	n.a.	n.a.	n.a.	n.a.	n.a.	n.a.
Smp_074160	Chr_6	363056	3970	Autosome	Chr_6	n.a.	n.a.	n.a.	n.a.	n.a.	n.a.	n.a.	n.a.	n.a.	n.a.	n.a.	n.a.	n.a.	n.a.
Smp_074250	Chr_6	565649	483	Autosome	Chr_6	n.a.	n.a.	n.a.	n.a.	n.a.	n.a.	n.a.	n.a.	n.a.	n.a.	n.a.	n.a.	n.a.	n.a.
Smp_075060	Chr_3	6983133	2341	Autosome	Chr_3	n.a.	n.a.	n.a.	n.a.	n.a.	n.a.	n.a.	n.a.	n.a.	n.a.	n.a.	n.a.	n.a.	n.a.
Smp_075790	Chr_3.unplaced.SC_0105	1015795	3518	Autosome	Chr_UP	n.a.	n.a.	n.a.	n.a.	n.a.	n.a.	n.a.	n.a.	n.a.	n.a.	n.a.	n.a.	n.a.	n.a.
Smp_076550	SC_0149	137602	1043	Autosome	Chr_UP	n.a.	n.a.	n.a.	n.a.	n.a.	n.a.	Sha_C9904361	n.a.	Chr_UP	0	0	n.a.	n.a.	n.a.
Smp_076710	Chr_1	11811781	1154	Autosome	Chr_1	n.a.	n.a.	n.a.	n.a.	n.a.	n.a.	n.a.	n.a.	n.a.	n.a.	n.a.	n.a.	n.a.	n.a.
Smp_077690	Chr_6	19401410	624	Autosome	Chr_6	n.a.	n.a.	n.a.	n.a.	n.a.	n.a.	n.a.	n.a.	n.a.	n.a.	n.a.	n.a.	n.a.	n.a.
Smp_077740	Chr_6	19499081	9437	Autosome	Chr_6	n.a.	n.a.	n.a.	n.a.	n.a.	n.a.	n.a.	n.a.	n.a.	n.a.	n.a.	n.a.	n.a.	n.a.
Smp_077790	Chr_6	19709750	248	Autosome	Chr_6	n.a.	n.a.	n.a.	n.a.	n.a.	n.a.	n.a.	n.a.	n.a.	n.a.	n.a.	n.a.	n.a.	n.a.
Smp_078490	Chr_1.unplaced.SC_0076	241026	1489	Autosome	Chr_UP	n.a.	n.a.	n.a.	n.a.	n.a.	n.a.	n.a.	n.a.	n.a.	n.a.	n.a.	n.a.	n.a.	n.a.
Smp_080080	SC_0249	85372	17	Autosome	Chr_UP	n.a.	n.a.	n.a.	n.a.	n.a.	n.a.	n.a.	n.a.	n.a.	n.a.	n.a.	n.a.	n.a.	n.a.
Smp_082430	Chr_3	2163280	21305	Autosome	Chr_3	n.a.	n.a.	n.a.	n.a.	n.a.	n.a.	n.a.	n.a.	n.a.	n.a.	n.a.	n.a.	n.a.	n.a.
Smp_082500	Chr_3	2396402	934	Autosome	Chr_3	n.a.	n.a.	n.a.	n.a.	n.a.	n.a.	n.a.	n.a.	n.a.	n.a.	n.a.	n.a.	n.a.	n.a.
Smp_082750	Chr_2	16360827	293	Autosome	Chr_2	n.a.	n.a.	n.a.	n.a.	n.a.	n.a.	n.a.	n.a.	n.a.	n.a.	n.a.	n.a.	n.a.	n.a.
Smp_084690	Chr_1.unplaced.SC_0010	339770	32	Autosome	Chr_UP	n.a.	n.a.	n.a.	n.a.	n.a.	n.a.	n.a.	n.a.	n.a.	n.a.	n.a.	n.a.	n.a.	n.a.
Smp_085700	Chr_6	6586210	314	Autosome	Chr_6	n.a.	n.a.	n.a.	n.a.	n.a.	n.a.	n.a.	n.a.	n.a.	n.a.	n.a.	n.a.	n.a.	n.a.
Smp_086310	Chr_2	17169450	257	Autosome	Chr_2	n.a.	n.a.	n.a.	n.a.	n.a.	n.a.	n.a.	n.a.	n.a.	n.a.	n.a.	n.a.	n.a.	n.a.
Smp_088570	Chr_2	1723708	523	Autosome	Chr_2	n.a.	n.a.	n.a.	n.a.	n.a.	n.a.	n.a.	n.a.	n.a.	n.a.	n.a.	n.a.	n.a.	n.a.
Smp_088610	Chr_2	1242650	1118	Autosome	Chr_2	n.a.	n.a.	n.a.	n.a.	n.a.	n.a.	n.a.	n.a.	n.a.	n.a.	n.a.	n.a.	n.a.	n.a.
Smp_088700	Chr_2	1468345	840	Autosome	Chr_2	n.a.	n.a.	n.a.	n.a.	n.a.	n.a.	n.a.	n.a.	n.a.	n.a.	n.a.	n.a.	n.a.	n.a.
Smp_088800	SC_0249	50275	2300	Autosome	Chr_UP	n.a.	n.a.	n.a.	n.a.	n.a.	n.a.	n.a.	n.a.	n.a.	n.a.	n.a.	n.a.	n.a.	n.a.
Smp_089270	Chr_6	1316842	21026	Autosome	Chr_6	n.a.	n.a.	n.a.	n.a.	n.a.	n.a.	n.a.	n.a.	n.a.	n.a.	n.a.	n.a.	n.a.	n.a.
Smp_091660	Chr_6	4195157	697	Autosome	Chr_6	n.a.	n.a.	n.a.	n.a.	n.a.	n.a.	n.a.	n.a.	n.a.	n.a.	n.a.	n.a.	n.a.	n.a.
Smp_093070	SC_0286	55313	1269	Autosome	Chr_UP	n.a.	n.a.	n.a.	n.a.	n.a.	n.a.	n.a.	n.a.	n.a.	n.a.	n.a.	n.a.	n.a.	n.a.
Smp_094390	Chr_2	1768875	3236	Autosome	Chr_2	n.a.	n.a.	n.a.	n.a.	n.a.	n.a.	n.a.	n.a.	n.a.	n.a.	n.a.	n.a.	n.a.	n.a.
Smp_095460	Chr_1	44090155	826	Autosome	Chr_1	n.a.	n.a.	n.a.	n.a.	n.a.	n.a.	n.a.	n.a.	n.a.	n.a.	n.a.	n.a.	n.a.	n.a.
Smp_095650	SC_0204	104402	8009	Autosome	Chr_UP	n.a.	n.a.	n.a.	n.a.	n.a.	n.a.	n.a.	n.a.	n.a.	n.a.	n.a.	n.a.	n.a.	n.a.
Smp_096500	SC_0151	534666	342	Autosome	Chr_UP	n.a.	n.a.	n.a.	n.a.	n.a.	n.a.	n.a.	n.a.	n.a.	n.a.	n.a.	n.a.	n.a.	n.a.
Smp_098240	SC_0230	111021	15677	Autosome	Chr_UP	n.a.	n.a.	n.a.	n.a.	n.a.	n.a.	n.a.	n.a.	n.a.	n.a.	n.a.	n.a.	n.a.	n.a.
Smp_098420	Chr_6	15633036	1082	Autosome	Chr_6	n.a.	n.a.	n.a.	n.a.	n.a.	n.a.	Sha_scaffold9	n.a.	Chr_6	n.a.	n.a.	n.a.	n.a.	n.a.
Smp_099090	Chr_ZW	44494512	35524	Autosome	Chr_PSA	n.a.	n.a.	n.a.	n.a.	n.a.	n.a.	n.a.	n.a.	n.a.	n.a.	n.a.	n.a.	n.a.	n.a.
Smp_099100	Chr_ZW	44566095	717	Autosome	Chr_PSA	n.a.	n.a.	n.a.	n.a.	n.a.	n.a.	n.a.	n.a.	n.a.	n.a.	n.a.	n.a.	n.a.	n.a.
Smp_100360	Chr_4	7658192	516	Autosome	Chr_4	n.a.	n.a.	n.a.	n.a.	n.a.	n.a.	n.a.	n.a.	n.a.	n.a.	n.a.	n.a.	n.a.	n.a.
Smp_100450	Chr_2.unplaced.SC_0332	27091	347	Autosome	Chr_UP	n.a.	n.a.	n.a.	n.a.	n.a.	n.a.	n.a.	n.a.	n.a.	n.a.	n.a.	n.a.	n.a.	n.a.
Smp_100600	SC_0160	8019	230	Autosome	Chr_UP	n.a.	n.a.	n.a.	n.a.	n.a.	n.a.	n.a.	n.a.	n.a.	n.a.	n.a.	n.a.	n.a.	n.a.
Smp_100790	SC_0125	208251	317	Autosome	Chr_UP	n.a.	n.a.	n.a.	n.a.	n.a.	n.a.	n.a.	n.a.	n.a.	n.a.	n.a.	n.a.	n.a.	n.a.
Smp_101100	Chr_1.unplaced.SC_0010	2082098	509	Autosome	Chr_UP	n.a.	n.a.	n.a.	n.a.	n.a.	n.a.	n.a.	n.a.	n.a.	n.a.	n.a.	n.a.	n.a.	n.a.
Smp_101200	Chr_1	37983299	368	Autosome	Chr_1	n.a.	n.a.	n.a.	n.a.	n.a.	n.a.	n.a.	n.a.	n.a.	n.a.	n.a.	n.a.	n.a.	n.a.
Smp_101720	Chr_3	1742503	476	Autosome	Chr_3	n.a.	n.a.	n.a.	n.a.	n.a.	n.a.	n.a.	n.a.	n.a.	n.a.	n.a.	n.a.	n.a.	n.a.
Smp_102020	Chr_1.unplaced.SC_0122	1013419	4546	Autosome	Chr_UP	n.a.	n.a.	n.a.	n.a.	n.a.	n.a.	n.a.	n.a.	n.a.	n.a.	n.a.	n.a.	n.a.	n.a.
Smp_104170	Chr_1	26693887	527	Autosome	Chr_1	n.a.	n.a.	n.a.	n.a.	n.a.	n.a.	n.a.	n.a.	n.a.	n.a.	n.a.	n.a.	n.a.	n.a.
Smp_104460	SC_0178	375202	248	Autosome	Chr_UP	n.a.	n.a.	n.a.	n.a.	n.a.	n.a.	n.a.	n.a.	n.a.	n.a.	n.a.	n.a.	n.a.	n.a.
Smp_106750	SC_0221	12349	955	Autosome	Chr_UP	n.a.	n.a.	n.a.	n.a.	n.a.	n.a.	n.a.	n.a.	n.a.	n.a.	n.a.	n.a.	n.a.	n.a.
Smp_107750	Chr_5	3012530	347	Autosome	Chr_5	n.a.	n.a.	n.a.	n.a.	n.a.	n.a.	n.a.	n.a.	n.a.	n.a.	n.a.	n.a.	n.a.	n.a.
Smp_107810	SC_0160	13461	173	Autosome	Chr_UP	n.a.	n.a.	n.a.	n.a.	n.a.	n.a.	n.a.	n.a.	n.a.	n.a.	n.a.	n.a.	n.a.	n.a.
Smp_107860	SC_0160	20570	173	Autosome	Chr_UP	n.a.	n.a.	n.a.	n.a.	n.a.	n.a.	n.a.	n.a.	n.a.	n.a.	n.a.	n.a.	n.a.	n.a.
Smp_108010	Chr_2.unplaced.SC_0332	1616	376	Autosome	Chr_UP	n.a.	n.a.	n.a.	n.a.	n.a.	n.a.	n.a.	n.a.	n.a.	n.a.	n.a.	n.a.	n.a.	n.a.
Smp_108640	Chr_1.unplaced.SC_0010	1265924	55	Autosome	Chr_UP	n.a.	n.a.	n.a.	n.a.	n.a.	n.a.	n.a.	n.a.	n.a.	n.a.	n.a.	n.a.	n.a.	n.a.
Smp_109090	SC_0328	31664	737	Autosome	Chr_UP	n.a.	n.a.	n.a.	n.a.	n.a.	n.a.	n.a.	n.a.	n.a.	n.a.	n.a.	n.a.	n.a.	n.a.
Smp_109300	Chr_5	3039138	1127	Autosome	Chr_5	n.a.	n.a.	n.a.	n.a.	n.a.	n.a.	n.a.	n.a.	n.a.	n.a.	n.a.	n.a.	n.a.	n.a.
Smp_109340	Chr_4	4406263	1023	Autosome	Chr_4	n.a.	n.a.	n.a.	n.a.	n.a.	n.a.	n.a.	n.a.	n.a.	n.a.	n.a.	n.a.	n.a.	n.a.
Smp_110390	SC_0160	19468	173	Autosome	Chr_UP	n.a.	n.a.	n.a.	n.a.	n.a.	n.a.	n.a.	n.a.	n.a.	n.a.	n.a.	n.a.	n.a.	n.a.
Smp_110560	SC_0247	185427	817	Autosome	Chr_UP	n.a.	n.a.	n.a.	n.a.	n.a.	n.a.	n.a.	n.a.	n.a.	n.a.	n.a.	n.a.	n.a.	n.a.
Smp_110730	SC_0126	719911	126	Autosome	Chr_UP	n.a.	n.a.	n.a.	n.a.	n.a.	n.a.	n.a.	n.a.	n.a.	n.a.	n.a.	n.a.	n.a.	n.a.
Smp_111340	Chr_2.unplaced.SC_0120	603	1019	Autosome	Chr_UP	n.a.	n.a.	n.a.	n.a.	n.a.	n.a.	Sha_C9073707	n.a.	Chr_UP	n.a.	n.a.	n.a.	n.a.	n.a.
Smp_111980	Chr_4	6968422	1119	Autosome	Chr_4	n.a.	n.a.	n.a.	n.a.	n.a.	n.a.	n.a.	n.a.	n.a.	n.a.	n.a.	n.a.	n.a.	n.a.
Smp_112090	SC_0243	55611	1498	Autosome	Chr_UP	n.a.	n.a.	n.a.	n.a.	n.a.	n.a.	n.a.	n.a.	n.a.	n.a.	n.a.	n.a.	n.a.	n.a.
Smp_112450	Chr_3.unplaced.SC_0044	396163	10439	Autosome	Chr_UP	n.a.	n.a.	n.a.	n.a.	n.a.	n.a.	n.a.	n.a.	n.a.	n.a.	n.a.	n.a.	n.a.	n.a.
Smp_112480	SC_0037	1552676	278	Autosome	Chr_UP	n.a.	n.a.	n.a.	n.a.	n.a.	n.a.	n.a.	n.a.	n.a.	n.a.	n.a.	n.a.	n.a.	n.a.
Smp_112520	Chr_ZW	35375524	668	Autosome	Chr_PSA	n.a.	n.a.	n.a.	n.a.	n.a.	n.a.	n.a.	n.a.	n.a.	n.a.	n.a.	n.a.	n.a.	n.a.
Smp_112910	SC_0037	1507713	737	Autosome	Chr_UP	n.a.	n.a.	n.a.	n.a.	n.a.	n.a.	n.a.	n.a.	n.a.	n.a.	n.a.	n.a.	n.a.	n.a.
Smp_112930	Chr_3	11757890	483	Autosome	Chr_3	SJC_S016367	1509	Chr_3	0	0	n.a.	n.a.	n.a.	n.a.	n.a.	n.a.	n.a.	n.a.	n.a.
Smp_113640	Chr_3	10791968	119	Autosome	Chr_3	n.a.	n.a.	n.a.	n.a.	n.a.	n.a.	n.a.	n.a.	n.a.	n.a.	n.a.	n.a.	n.a.	n.a.
Smp_113750	Chr_2.unplaced.SC_0108	110319	3469	Autosome	Chr_UP	n.a.	n.a.	n.a.	n.a.	n.a.	n.a.	n.a.	n.a.	n.a.	n.a.	n.a.	n.a.	n.a.	n.a.
Smp_114020	SC_0236	148696	131	Autosome	Chr_UP	n.a.	n.a.	n.a.	n.a.	n.a.	n.a.	n.a.	n.a.	n.a.	n.a.	n.a.	n.a.	n.a.	n.a.
Smp_114080	Chr_6	13963725	167	Autosome	Chr_6	n.a.	n.a.	n.a.	n.a.	n.a.	n.a.	n.a.	n.a.	n.a.	n.a.	n.a.	n.a.	n.a.	n.a.
Smp_114210	Chr_1.unplaced.SC_0135	638822	656	Autosome	Chr_UP	n.a.	n.a.	n.a.	n.a.	n.a.	n.a.	n.a.	n.a.	n.a.	n.a.	n.a.	n.a.	n.a.	n.a.
Smp_114280	Chr_ZW	35443577	302	Autosome	Chr_PSA	n.a.	n.a.	n.a.	n.a.	n.a.	n.a.	n.a.	n.a.	n.a.	n.a.	n.a.	n.a.	n.a.	n.a.
Smp_114340	Chr_4	18813447	6425	Autosome	Chr_4	n.a.	n.a.	n.a.	n.a.	n.a.	n.a.	n.a.	n.a.	n.a.	n.a.	n.a.	n.a.	n.a.	n.a.
Smp_114740	Chr_2	2156102	317	Autosome	Chr_2	n.a.	n.a.	n.a.	n.a.	n.a.	n.a.	n.a.	n.a.	n.a.	n.a.	n.a.	n.a.	n.a.	n.a.
Smp_114900	Chr_4	16505614	158	Autosome	Chr_4	n.a.	n.a.	n.a.	n.a.	n.a.	n.a.	n.a.	n.a.	n.a.	n.a.	n.a.	n.a.	n.a.	n.a.
Smp_114970	Chr_4	30070351	1428	Autosome	Chr_4	n.a.	n.a.	n.a.	n.a.	n.a.	n.a.	n.a.	n.a.	n.a.	n.a.	n.a.	n.a.	n.a.	n.a.
Smp_116070	Chr_1	4762018	266	Autosome	Chr_1	n.a.	n.a.	n.a.	n.a.	n.a.	n.a.	n.a.	n.a.	n.a.	n.a.	n.a.	n.a.	n.a.	n.a.
Smp_116290	Chr_1	52297572	341	Autosome	Chr_1	n.a.	n.a.	n.a.	n.a.	n.a.	n.a.	n.a.	n.a.	n.a.	n.a.	n.a.	n.a.	n.a.	n.a.
Smp_116370	Chr_1	56919133	188	Autosome	Chr_1	n.a.	n.a.	n.a.	n.a.	n.a.	n.a.	n.a.	n.a.	n.a.	n.a.	n.a.	n.a.	n.a.	n.a.
Smp_116960	Chr_2.unplaced.SC_0332	36684	347	Autosome	Chr_UP	SJC_S018992	1952	Chr_UP	0	1	n.a.	n.a.	n.a.	n.a.	n.a.	n.a.	n.a.	n.a.	n.a.
Smp_117000	SC_0134	851276	386	Autosome	Chr_UP	n.a.	n.a.	n.a.	n.a.	n.a.	n.a.	n.a.	n.a.	n.a.	n.a.	n.a.	n.a.	n.a.	n.a.
Smp_117390	Chr_3.unplaced.SC_0174	487486	350	Autosome	Chr_UP	n.a.	n.a.	n.a.	n.a.	n.a.	n.a.	n.a.	n.a.	n.a.	n.a.	n.a.	n.a.	n.a.	n.a.
Smp_117880	Chr_1	27841572	296	Autosome	Chr_1	n.a.	n.a.	n.a.	n.a.	n.a.	n.a.	n.a.	n.a.	n.a.	n.a.	n.a.	n.a.	n.a.	n.a.
Smp_117920	Chr_3.unplaced.SC_0083	641276	224	Autosome	Chr_UP	n.a.	n.a.	n.a.	n.a.	n.a.	n.a.	n.a.	n.a.	n.a.	n.a.	n.a.	n.a.	n.a.	n.a.
Smp_117990	Chr_1	51953485	612	Autosome	Chr_1	n.a.	n.a.	n.a.	n.a.	n.a.	n.a.	n.a.	n.a.	n.a.	n.a.	n.a.	n.a.	n.a.	n.a.
Smp_118010	Chr_1.unplaced.SC_0094	447563	764	Autosome	Chr_UP	n.a.	n.a.	n.a.	n.a.	n.a.	n.a.	n.a.	n.a.	n.a.	n.a.	n.a.	n.a.	n.a.	n.a.
Smp_118190	Chr_3.unplaced.SC_0220	21003	467	Autosome	Chr_UP	n.a.	n.a.	n.a.	n.a.	n.a.	n.a.	n.a.	n.a.	n.a.	n.a.	n.a.	n.a.	n.a.	n.a.
Smp_118230	Chr_1	54954651	230	Autosome	Chr_1	n.a.	n.a.	n.a.	n.a.	n.a.	n.a.	n.a.	n.a.	n.a.	n.a.	n.a.	n.a.	n.a.	n.a.
Smp_118280	Chr_1	9884208	563	Autosome	Chr_1	n.a.	n.a.	n.a.	n.a.	n.a.	n.a.	n.a.	n.a.	n.a.	n.a.	n.a.	n.a.	n.a.	n.a.
Smp_118350	SC_0176	23267	398	Autosome	Chr_UP	n.a.	n.a.	n.a.	n.a.	n.a.	n.a.	n.a.	n.a.	n.a.	n.a.	n.a.	n.a.	n.a.	n.a.
Smp_118560	Chr_4	9783596	422	Autosome	Chr_4	n.a.	n.a.	n.a.	n.a.	n.a.	n.a.	n.a.	n.a.	n.a.	n.a.	n.a.	n.a.	n.a.	n.a.
Smp_119050	Chr_4	11433791	1683	Autosome	Chr_4	n.a.	n.a.	n.a.	n.a.	n.a.	n.a.	n.a.	n.a.	n.a.	n.a.	n.a.	n.a.	n.a.	n.a.
Smp_119210	SC_0049	1869920	274	Autosome	Chr_UP	n.a.	n.a.	n.a.	n.a.	n.a.	n.a.	n.a.	n.a.	n.a.	n.a.	n.a.	n.a.	n.a.	n.a.
Smp_119320	SC_0147	150825	197	Autosome	Chr_UP	n.a.	n.a.	n.a.	n.a.	n.a.	n.a.	Sha_C9757928	n.a.	Chr_UP	0	0	n.a.	n.a.	n.a.
Smp_119550	Chr_5	4354481	86	Autosome	Chr_5	n.a.	n.a.	n.a.	n.a.	n.a.	n.a.	n.a.	n.a.	n.a.	n.a.	n.a.	n.a.	n.a.	n.a.
Smp_119730	SC_0246	208677	221	Autosome	Chr_UP	n.a.	n.a.	n.a.	n.a.	n.a.	n.a.	Sha_C9973347	n.a.	Chr_UP	0	0	n.a.	n.a.	n.a.
Smp_120050	Chr_2.unplaced.SC_0108	1163972	923	Autosome	Chr_UP	n.a.	n.a.	n.a.	n.a.	n.a.	n.a.	Sha_C10009195	n.a.	Chr_UP	0	0	n.a.	n.a.	n.a.
Smp_120260	SC_0176	135656	245	Autosome	Chr_UP	n.a.	n.a.	n.a.	n.a.	n.a.	n.a.	n.a.	n.a.	n.a.	n.a.	n.a.	n.a.	n.a.	n.a.
Smp_120280	Chr_2	305363	1840	Autosome	Chr_2	n.a.	n.a.	n.a.	n.a.	n.a.	n.a.	n.a.	n.a.	n.a.	n.a.	n.a.	n.a.	n.a.	n.a.
Smp_120660	SC_0236	136209	17	Autosome	Chr_UP	n.a.	n.a.	n.a.	n.a.	n.a.	n.a.	n.a.	n.a.	n.a.	n.a.	n.a.	n.a.	n.a.	n.a.
Smp_122020	Chr_1	60013796	625	Autosome	Chr_1	n.a.	n.a.	n.a.	n.a.	n.a.	n.a.	n.a.	n.a.	n.a.	n.a.	n.a.	n.a.	n.a.	n.a.
Smp_122320	SC_0113	785087	918	Autosome	Chr_UP	n.a.	n.a.	n.a.	n.a.	n.a.	n.a.	n.a.	n.a.	n.a.	n.a.	n.a.	n.a.	n.a.	n.a.
Smp_122990	Chr_2	18459160	59	Autosome	Chr_2	n.a.	n.a.	n.a.	n.a.	n.a.	n.a.	n.a.	n.a.	n.a.	n.a.	n.a.	n.a.	n.a.	n.a.
Smp_123100	Chr_6	1962372	5233	Autosome	Chr_6	n.a.	n.a.	n.a.	n.a.	n.a.	n.a.	n.a.	n.a.	n.a.	n.a.	n.a.	n.a.	n.a.	n.a.
Smp_123200	Chr_6	3054607	4678	Autosome	Chr_6	n.a.	n.a.	n.a.	n.a.	n.a.	n.a.	n.a.	n.a.	n.a.	n.a.	n.a.	n.a.	n.a.	n.a.
Smp_123400	Chr_2.unplaced.SC_0171	140935	845	Autosome	Chr_UP	n.a.	n.a.	n.a.	n.a.	n.a.	n.a.	n.a.	n.a.	n.a.	n.a.	n.a.	n.a.	n.a.	n.a.
Smp_123900	Chr_1	8475573	1431	Autosome	Chr_1	n.a.	n.a.	n.a.	n.a.	n.a.	n.a.	n.a.	n.a.	n.a.	n.a.	n.a.	n.a.	n.a.	n.a.
Smp_123980	Chr_1	8116630	602	Autosome	Chr_1	n.a.	n.a.	n.a.	n.a.	n.a.	n.a.	n.a.	n.a.	n.a.	n.a.	n.a.	n.a.	n.a.	n.a.
Smp_124000	Chr_1	7842571	24359	Autosome	Chr_1	n.a.	n.a.	n.a.	n.a.	n.a.	n.a.	n.a.	n.a.	n.a.	n.a.	n.a.	n.a.	n.a.	n.a.
Smp_124560	SC_0037	156047	563	Autosome	Chr_UP	n.a.	n.a.	n.a.	n.a.	n.a.	n.a.	n.a.	n.a.	n.a.	n.a.	n.a.	n.a.	n.a.	n.a.
Smp_124870	Chr_1	32787092	862	Autosome	Chr_1	n.a.	n.a.	n.a.	n.a.	n.a.	n.a.	n.a.	n.a.	n.a.	n.a.	n.a.	n.a.	n.a.	n.a.
Smp_124880	Chr_1	32791440	778	Autosome	Chr_1	n.a.	n.a.	n.a.	n.a.	n.a.	n.a.	n.a.	n.a.	n.a.	n.a.	n.a.	n.a.	n.a.	n.a.
Smp_124900	Chr_1	32935034	4597	Autosome	Chr_1	n.a.	n.a.	n.a.	n.a.	n.a.	n.a.	n.a.	n.a.	n.a.	n.a.	n.a.	n.a.	n.a.	n.a.
Smp_125090	SC_0148	504590	1040	Autosome	Chr_UP	n.a.	n.a.	n.a.	n.a.	n.a.	n.a.	n.a.	n.a.	n.a.	n.a.	n.a.	n.a.	n.a.	n.a.
Smp_125180	Chr_1	38906977	437	Autosome	Chr_1	n.a.	n.a.	n.a.	n.a.	n.a.	n.a.	n.a.	n.a.	n.a.	n.a.	n.a.	n.a.	n.a.	n.a.
Smp_125240	Chr_ZW	33724456	1817	Autosome	Chr_PSA	n.a.	n.a.	n.a.	n.a.	n.a.	n.a.	n.a.	n.a.	n.a.	n.a.	n.a.	n.a.	n.a.	n.a.
Smp_125320	Chr_1	38370338	12941	Autosome	Chr_1	n.a.	n.a.	n.a.	n.a.	n.a.	n.a.	n.a.	n.a.	n.a.	n.a.	n.a.	n.a.	n.a.	n.a.
Smp_125410	SC_0097	246924	41	Autosome	Chr_UP	n.a.	n.a.	n.a.	n.a.	n.a.	n.a.	n.a.	n.a.	n.a.	n.a.	n.a.	n.a.	n.a.	n.a.
Smp_126040	Chr_1	30407301	35	Autosome	Chr_1	n.a.	n.a.	n.a.	n.a.	n.a.	n.a.	n.a.	n.a.	n.a.	n.a.	n.a.	n.a.	n.a.	n.a.
Smp_126470	Chr_7	8547841	18134	Autosome	Chr_7	n.a.	n.a.	n.a.	n.a.	n.a.	n.a.	n.a.	n.a.	n.a.	n.a.	n.a.	n.a.	n.a.	n.a.
Smp_126570	Chr_2	9836767	845	Autosome	Chr_2	n.a.	n.a.	n.a.	n.a.	n.a.	n.a.	n.a.	n.a.	n.a.	n.a.	n.a.	n.a.	n.a.	n.a.
Smp_126710	Chr_ZW	53214469	6681	Autosome	Chr_PSA	n.a.	n.a.	n.a.	n.a.	n.a.	n.a.	n.a.	n.a.	n.a.	n.a.	n.a.	n.a.	n.a.	n.a.
Smp_127300.2	Chr_1.unplaced.SC_0010	3892928	98	Autosome	Chr_UP	n.a.	n.a.	n.a.	n.a.	n.a.	n.a.	n.a.	n.a.	n.a.	n.a.	n.a.	n.a.	n.a.	n.a.
Smp_127320.2	Chr_1.unplaced.SC_0010	3770197	29	Autosome	Chr_UP	n.a.	n.a.	n.a.	n.a.	n.a.	n.a.	n.a.	n.a.	n.a.	n.a.	n.a.	n.a.	n.a.	n.a.
Smp_127350	Chr_1.unplaced.SC_0010	3590391	13399	Autosome	Chr_UP	n.a.	n.a.	n.a.	n.a.	n.a.	n.a.	n.a.	n.a.	n.a.	n.a.	n.a.	n.a.	n.a.	n.a.
Smp_127550	Chr_3	12004207	372	Autosome	Chr_3	n.a.	n.a.	n.a.	n.a.	n.a.	n.a.	n.a.	n.a.	n.a.	n.a.	n.a.	n.a.	n.a.	n.a.
Smp_128030	SC_0097	930850	18896	Autosome	Chr_UP	n.a.	n.a.	n.a.	n.a.	n.a.	n.a.	n.a.	n.a.	n.a.	n.a.	n.a.	n.a.	n.a.	n.a.
Smp_128080	Chr_2	27430587	170	Autosome	Chr_2	n.a.	n.a.	n.a.	n.a.	n.a.	n.a.	n.a.	n.a.	n.a.	n.a.	n.a.	n.a.	n.a.	n.a.
Smp_128520	Chr_2	9248649	1550	Autosome	Chr_2	n.a.	n.a.	n.a.	n.a.	n.a.	n.a.	n.a.	n.a.	n.a.	n.a.	n.a.	n.a.	n.a.	n.a.
Smp_128520.2	Chr_ZW	20691483	17	Autosome	Chr_PSA	n.a.	n.a.	n.a.	n.a.	n.a.	n.a.	n.a.	n.a.	n.a.	n.a.	n.a.	n.a.	n.a.	n.a.
Smp_128710	Chr_2	15937480	1745	Autosome	Chr_2	n.a.	n.a.	n.a.	n.a.	n.a.	n.a.	n.a.	n.a.	n.a.	n.a.	n.a.	n.a.	n.a.	n.a.
Smp_128820	Chr_2	15365957	877	Autosome	Chr_2	n.a.	n.a.	n.a.	n.a.	n.a.	n.a.	n.a.	n.a.	n.a.	n.a.	n.a.	n.a.	n.a.	n.a.
Smp_128830	Chr_2	15360855	935	Autosome	Chr_2	n.a.	n.a.	n.a.	n.a.	n.a.	n.a.	n.a.	n.a.	n.a.	n.a.	n.a.	n.a.	n.a.	n.a.
Smp_128900	Chr_1	21620809	748	Autosome	Chr_1	n.a.	n.a.	n.a.	n.a.	n.a.	n.a.	n.a.	n.a.	n.a.	n.a.	n.a.	n.a.	n.a.	n.a.
Smp_128910	Chr_1	21643574	3164	Autosome	Chr_1	n.a.	n.a.	n.a.	n.a.	n.a.	n.a.	Sha_C10050065	n.a.	Chr_1	0	0	n.a.	n.a.	n.a.
Smp_129160	Chr_3	12735159	814	Autosome	Chr_3	n.a.	n.a.	n.a.	n.a.	n.a.	n.a.	n.a.	n.a.	n.a.	n.a.	n.a.	n.a.	n.a.	n.a.
Smp_129550	Chr_1	5343433	25540	Autosome	Chr_1	n.a.	n.a.	n.a.	n.a.	n.a.	n.a.	n.a.	n.a.	n.a.	n.a.	n.a.	n.a.	n.a.	n.a.
Smp_130150	Chr_2	12414066	684	Autosome	Chr_2	n.a.	n.a.	n.a.	n.a.	n.a.	n.a.	n.a.	n.a.	n.a.	n.a.	n.a.	n.a.	n.a.	n.a.
Smp_130720	Chr_ZW	21422908	563	Autosome	Chr_PSA	n.a.	n.a.	n.a.	n.a.	n.a.	n.a.	n.a.	n.a.	n.a.	n.a.	n.a.	n.a.	n.a.	n.a.
Smp_130730	Chr_ZW	21426610	1657	Autosome	Chr_PSA	n.a.	n.a.	n.a.	n.a.	n.a.	n.a.	n.a.	n.a.	n.a.	n.a.	n.a.	n.a.	n.a.	n.a.
Smp_131040	Chr_4	27701146	32	Autosome	Chr_4	n.a.	n.a.	n.a.	n.a.	n.a.	n.a.	n.a.	n.a.	n.a.	n.a.	n.a.	n.a.	n.a.	n.a.
Smp_131450	Chr_ZW	57607061	458	Autosome	Chr_PSA	n.a.	n.a.	n.a.	n.a.	n.a.	n.a.	n.a.	n.a.	n.a.	n.a.	n.a.	n.a.	n.a.	n.a.
Smp_131480	Chr_ZW	57191775	4553	Autosome	Chr_PSA	n.a.	n.a.	n.a.	n.a.	n.a.	n.a.	n.a.	n.a.	n.a.	n.a.	n.a.	n.a.	n.a.	n.a.
Smp_131490	Chr_ZW	57127559	10001	Autosome	Chr_PSA	n.a.	n.a.	n.a.	n.a.	n.a.	n.a.	n.a.	n.a.	n.a.	n.a.	n.a.	n.a.	n.a.	n.a.
Smp_131750	Chr_3.unplaced.SC_0105	813816	563	Autosome	Chr_UP	n.a.	n.a.	n.a.	n.a.	n.a.	n.a.	n.a.	n.a.	n.a.	n.a.	n.a.	n.a.	n.a.	n.a.
Smp_132110	Chr_ZW	33224939	845	Autosome	Chr_PSA	n.a.	n.a.	n.a.	n.a.	n.a.	n.a.	n.a.	n.a.	n.a.	n.a.	n.a.	n.a.	n.a.	n.a.
Smp_132360	Chr_3	3277057	845	Autosome	Chr_3	n.a.	n.a.	n.a.	n.a.	n.a.	n.a.	n.a.	n.a.	n.a.	n.a.	n.a.	n.a.	n.a.	n.a.
Smp_132470	Chr_3	23599291	4772	Autosome	Chr_3	n.a.	n.a.	n.a.	n.a.	n.a.	n.a.	n.a.	n.a.	n.a.	n.a.	n.a.	n.a.	n.a.	n.a.
Smp_132760	Chr_1.unplaced.SC_0010	1363548	419	Autosome	Chr_UP	n.a.	n.a.	n.a.	n.a.	n.a.	n.a.	n.a.	n.a.	n.a.	n.a.	n.a.	n.a.	n.a.	n.a.
Smp_133340	SC_0080	504267	2620	Autosome	Chr_UP	n.a.	n.a.	n.a.	n.a.	n.a.	n.a.	n.a.	n.a.	n.a.	n.a.	n.a.	n.a.	n.a.	n.a.
Smp_133400	SC_0080	917651	8924	Autosome	Chr_UP	n.a.	n.a.	n.a.	n.a.	n.a.	n.a.	Sha_scaffold1289	n.a.	Chr_UP	n.a.	n.a.	n.a.	n.a.	n.a.
Smp_133890	Chr_ZW	460666	17397	Autosome	Chr_PSA	n.a.	n.a.	n.a.	n.a.	n.a.	n.a.	n.a.	n.a.	n.a.	n.a.	n.a.	n.a.	n.a.	n.a.
Smp_134030	Chr_2	3562298	1154	Autosome	Chr_2	n.a.	n.a.	n.a.	n.a.	n.a.	n.a.	n.a.	n.a.	n.a.	n.a.	n.a.	n.a.	n.a.	n.a.
Smp_134460	Chr_4	4802429	1615	Autosome	Chr_4	n.a.	n.a.	n.a.	n.a.	n.a.	n.a.	n.a.	n.a.	n.a.	n.a.	n.a.	n.a.	n.a.	n.a.
Smp_134700	Chr_3	22808453	17593	Autosome	Chr_3	n.a.	n.a.	n.a.	n.a.	n.a.	n.a.	n.a.	n.a.	n.a.	n.a.	n.a.	n.a.	n.a.	n.a.
Smp_134710	Chr_3	22723749	38275	Autosome	Chr_3	n.a.	n.a.	n.a.	n.a.	n.a.	n.a.	n.a.	n.a.	n.a.	n.a.	n.a.	n.a.	n.a.	n.a.
Smp_135090	Chr_2	24675548	451	Autosome	Chr_2	n.a.	n.a.	n.a.	n.a.	n.a.	n.a.	n.a.	n.a.	n.a.	n.a.	n.a.	n.a.	n.a.	n.a.
Smp_135320	Chr_ZW	40131341	774	Autosome	Chr_PSA	n.a.	n.a.	n.a.	n.a.	n.a.	n.a.	n.a.	n.a.	n.a.	n.a.	n.a.	n.a.	n.a.	n.a.
Smp_135690	Chr_6	11116628	3797	Autosome	Chr_6	n.a.	n.a.	n.a.	n.a.	n.a.	n.a.	n.a.	n.a.	n.a.	n.a.	n.a.	n.a.	n.a.	n.a.
Smp_135700	Chr_6	11098873	458	Autosome	Chr_6	n.a.	n.a.	n.a.	n.a.	n.a.	n.a.	n.a.	n.a.	n.a.	n.a.	n.a.	n.a.	n.a.	n.a.
Smp_136090	Chr_1	29179417	13846	Autosome	Chr_1	n.a.	n.a.	n.a.	n.a.	n.a.	n.a.	n.a.	n.a.	n.a.	n.a.	n.a.	n.a.	n.a.	n.a.
Smp_136220	Chr_5	471	3390	Autosome	Chr_5	n.a.	n.a.	n.a.	n.a.	n.a.	n.a.	n.a.	n.a.	n.a.	n.a.	n.a.	n.a.	n.a.	n.a.
Smp_136790	Chr_2	23380390	26	Autosome	Chr_2	n.a.	n.a.	n.a.	n.a.	n.a.	n.a.	n.a.	n.a.	n.a.	n.a.	n.a.	n.a.	n.a.	n.a.
Smp_136830	Chr_3	23488372	55334	Autosome	Chr_3	n.a.	n.a.	n.a.	n.a.	n.a.	n.a.	n.a.	n.a.	n.a.	n.a.	n.a.	n.a.	n.a.	n.a.
Smp_136840	Chr_3	23549713	2145	Autosome	Chr_3	n.a.	n.a.	n.a.	n.a.	n.a.	n.a.	n.a.	n.a.	n.a.	n.a.	n.a.	n.a.	n.a.	n.a.
Smp_137290	SC_0241	160030	764	Autosome	Chr_UP	n.a.	n.a.	n.a.	n.a.	n.a.	n.a.	n.a.	n.a.	n.a.	n.a.	n.a.	n.a.	n.a.	n.a.
Smp_137400	Chr_1	33305584	339	Autosome	Chr_1	n.a.	n.a.	n.a.	n.a.	n.a.	n.a.	n.a.	n.a.	n.a.	n.a.	n.a.	n.a.	n.a.	n.a.
Smp_137450	Chr_3.unplaced.SC_0083	174222	20448	Autosome	Chr_UP	n.a.	n.a.	n.a.	n.a.	n.a.	n.a.	n.a.	n.a.	n.a.	n.a.	n.a.	n.a.	n.a.	n.a.
Smp_138060	SC_0163	92674	14478	Autosome	Chr_UP	n.a.	n.a.	n.a.	n.a.	n.a.	n.a.	n.a.	n.a.	n.a.	n.a.	n.a.	n.a.	n.a.	n.a.
Smp_138080	SC_0163	45359	18473	Autosome	Chr_UP	n.a.	n.a.	n.a.	n.a.	n.a.	n.a.	n.a.	n.a.	n.a.	n.a.	n.a.	n.a.	n.a.	n.a.
Smp_138460	Chr_3	19777257	1367	Autosome	Chr_3	n.a.	n.a.	n.a.	n.a.	n.a.	n.a.	n.a.	n.a.	n.a.	n.a.	n.a.	n.a.	n.a.	n.a.
Smp_138650	SC_0246	121789	845	Autosome	Chr_UP	n.a.	n.a.	n.a.	n.a.	n.a.	n.a.	n.a.	n.a.	n.a.	n.a.	n.a.	n.a.	n.a.	n.a.
Smp_138720	Chr_3.unplaced.SC_0083	1294801	674	Autosome	Chr_UP	n.a.	n.a.	n.a.	n.a.	n.a.	n.a.	n.a.	n.a.	n.a.	n.a.	n.a.	n.a.	n.a.	n.a.
Smp_138750	Chr_3.unplaced.SC_0083	1134138	17732	Autosome	Chr_UP	n.a.	n.a.	n.a.	n.a.	n.a.	n.a.	n.a.	n.a.	n.a.	n.a.	n.a.	n.a.	n.a.	n.a.
Smp_138800	Chr_1	39486760	470	Autosome	Chr_1	n.a.	n.a.	n.a.	n.a.	n.a.	n.a.	n.a.	n.a.	n.a.	n.a.	n.a.	n.a.	n.a.	n.a.
Smp_138820	Chr_1	39443974	820	Autosome	Chr_1	n.a.	n.a.	n.a.	n.a.	n.a.	n.a.	n.a.	n.a.	n.a.	n.a.	n.a.	n.a.	n.a.	n.a.
Smp_139270	SC_0226	172413	47	Autosome	Chr_UP	n.a.	n.a.	n.a.	n.a.	n.a.	n.a.	n.a.	n.a.	n.a.	n.a.	n.a.	n.a.	n.a.	n.a.
Smp_139300	SC_0177	247724	4882	Autosome	Chr_UP	n.a.	n.a.	n.a.	n.a.	n.a.	n.a.	n.a.	n.a.	n.a.	n.a.	n.a.	n.a.	n.a.	n.a.
Smp_139320	SC_0177	234152	17	Autosome	Chr_UP	n.a.	n.a.	n.a.	n.a.	n.a.	n.a.	n.a.	n.a.	n.a.	n.a.	n.a.	n.a.	n.a.	n.a.
Smp_139380	Chr_7	9327558	2483	Autosome	Chr_7	n.a.	n.a.	n.a.	n.a.	n.a.	n.a.	n.a.	n.a.	n.a.	n.a.	n.a.	n.a.	n.a.	n.a.
Smp_139610	SC_0125	546741	22271	Autosome	Chr_UP	n.a.	n.a.	n.a.	n.a.	n.a.	n.a.	n.a.	n.a.	n.a.	n.a.	n.a.	n.a.	n.a.	n.a.
Smp_139780	Chr_ZW	51093228	44	Autosome	Chr_PSA	n.a.	n.a.	n.a.	n.a.	n.a.	n.a.	n.a.	n.a.	n.a.	n.a.	n.a.	n.a.	n.a.	n.a.
Smp_140380	SC_0179	77364	122	Autosome	Chr_UP	n.a.	n.a.	n.a.	n.a.	n.a.	n.a.	n.a.	n.a.	n.a.	n.a.	n.a.	n.a.	n.a.	n.a.
Smp_141260	Chr_1	13874530	356	Autosome	Chr_1	n.a.	n.a.	n.a.	n.a.	n.a.	n.a.	n.a.	n.a.	n.a.	n.a.	n.a.	n.a.	n.a.	n.a.
Smp_141560	Chr_6	13016946	1188	Autosome	Chr_6	n.a.	n.a.	n.a.	n.a.	n.a.	n.a.	n.a.	n.a.	n.a.	n.a.	n.a.	n.a.	n.a.	n.a.
Smp_141620	SC_0211	36868	434	Autosome	Chr_UP	n.a.	n.a.	n.a.	n.a.	n.a.	n.a.	n.a.	n.a.	n.a.	n.a.	n.a.	n.a.	n.a.	n.a.
Smp_142000	Chr_1.unplaced.SC_0153	351633	62	Autosome	Chr_UP	n.a.	n.a.	n.a.	n.a.	n.a.	n.a.	n.a.	n.a.	n.a.	n.a.	n.a.	n.a.	n.a.	n.a.
Smp_142800	Chr_4	30463947	1391	Autosome	Chr_4	n.a.	n.a.	n.a.	n.a.	n.a.	n.a.	n.a.	n.a.	n.a.	n.a.	n.a.	n.a.	n.a.	n.a.
Smp_143210	Chr_4	5060337	582	Autosome	Chr_4	n.a.	n.a.	n.a.	n.a.	n.a.	n.a.	n.a.	n.a.	n.a.	n.a.	n.a.	n.a.	n.a.	n.a.
Smp_143450	SC_0182	139558	3167	Autosome	Chr_UP	n.a.	n.a.	n.a.	n.a.	n.a.	n.a.	n.a.	n.a.	n.a.	n.a.	n.a.	n.a.	n.a.	n.a.
Smp_143870	Chr_ZW	52099837	465	Autosome	Chr_PSA	n.a.	n.a.	n.a.	n.a.	n.a.	n.a.	n.a.	n.a.	n.a.	n.a.	n.a.	n.a.	n.a.	n.a.
Smp_144000	Chr_5	7698575	591	Autosome	Chr_5	n.a.	n.a.	n.a.	n.a.	n.a.	n.a.	n.a.	n.a.	n.a.	n.a.	n.a.	n.a.	n.a.	n.a.
Smp_144100	Chr_1	60440875	437	Autosome	Chr_1	n.a.	n.a.	n.a.	n.a.	n.a.	n.a.	n.a.	n.a.	n.a.	n.a.	n.a.	n.a.	n.a.	n.a.
Smp_144150	Chr_1	60665714	845	Autosome	Chr_1	n.a.	n.a.	n.a.	n.a.	n.a.	n.a.	n.a.	n.a.	n.a.	n.a.	n.a.	n.a.	n.a.	n.a.
Smp_144260	Chr_1	61289955	8747	Autosome	Chr_1	n.a.	n.a.	n.a.	n.a.	n.a.	n.a.	n.a.	n.a.	n.a.	n.a.	n.a.	n.a.	n.a.	n.a.
Smp_144420	SC_0237	34882	29	Autosome	Chr_UP	n.a.	n.a.	n.a.	n.a.	n.a.	n.a.	n.a.	n.a.	n.a.	n.a.	n.a.	n.a.	n.a.	n.a.
Smp_144710	Chr_7.unplaced.SC_0100	446949	35	Autosome	Chr_UP	n.a.	n.a.	n.a.	n.a.	n.a.	n.a.	n.a.	n.a.	n.a.	n.a.	n.a.	n.a.	n.a.	n.a.
Smp_144900	Chr_4	21445362	985	Autosome	Chr_4	n.a.	n.a.	n.a.	n.a.	n.a.	n.a.	n.a.	n.a.	n.a.	n.a.	n.a.	n.a.	n.a.	n.a.
Smp_145160	Chr_4	19019731	702	Autosome	Chr_4	n.a.	n.a.	n.a.	n.a.	n.a.	n.a.	n.a.	n.a.	n.a.	n.a.	n.a.	n.a.	n.a.	n.a.
Smp_145340	Chr_ZW	22125822	845	Autosome	Chr_PSA	n.a.	n.a.	n.a.	n.a.	n.a.	n.a.	n.a.	n.a.	n.a.	n.a.	n.a.	n.a.	n.a.	n.a.
Smp_145520	Chr_4	13602495	6260	Autosome	Chr_4	n.a.	n.a.	n.a.	n.a.	n.a.	n.a.	n.a.	n.a.	n.a.	n.a.	n.a.	n.a.	n.a.	n.a.
Smp_145690	Chr_3	20180870	1009	Autosome	Chr_3	n.a.	n.a.	n.a.	n.a.	n.a.	n.a.	n.a.	n.a.	n.a.	n.a.	n.a.	n.a.	n.a.	n.a.
Smp_145920	Chr_3	9460516	4561	Autosome	Chr_3	n.a.	n.a.	n.a.	n.a.	n.a.	n.a.	n.a.	n.a.	n.a.	n.a.	n.a.	n.a.	n.a.	n.a.
Smp_146350	Chr_2	9582631	122	Autosome	Chr_2	n.a.	n.a.	n.a.	n.a.	n.a.	n.a.	n.a.	n.a.	n.a.	n.a.	n.a.	n.a.	n.a.	n.a.
Smp_146360	Chr_2	9610782	6002	Autosome	Chr_2	n.a.	n.a.	n.a.	n.a.	n.a.	n.a.	n.a.	n.a.	n.a.	n.a.	n.a.	n.a.	n.a.	n.a.
Smp_146980	Chr_2	33357128	53	Autosome	Chr_2	n.a.	n.a.	n.a.	n.a.	n.a.	n.a.	n.a.	n.a.	n.a.	n.a.	n.a.	n.a.	n.a.	n.a.
Smp_147130	Chr_6	6221427	845	Autosome	Chr_6	n.a.	n.a.	n.a.	n.a.	n.a.	n.a.	n.a.	n.a.	n.a.	n.a.	n.a.	n.a.	n.a.	n.a.
Smp_147200	Chr_2	20648474	233	Autosome	Chr_2	n.a.	n.a.	n.a.	n.a.	n.a.	n.a.	n.a.	n.a.	n.a.	n.a.	n.a.	n.a.	n.a.	n.a.
Smp_147740	Chr_2	30327811	33471	Autosome	Chr_2	n.a.	n.a.	n.a.	n.a.	n.a.	n.a.	n.a.	n.a.	n.a.	n.a.	n.a.	n.a.	n.a.	n.a.
Smp_147910	Chr_1	48510919	74	Autosome	Chr_1	n.a.	n.a.	n.a.	n.a.	n.a.	n.a.	n.a.	n.a.	n.a.	n.a.	n.a.	n.a.	n.a.	n.a.
Smp_148170	Chr_ZW	19924006	2294	Autosome	Chr_PSA	n.a.	n.a.	n.a.	n.a.	n.a.	n.a.	n.a.	n.a.	n.a.	n.a.	n.a.	n.a.	n.a.	n.a.
Smp_148350	Chr_2	13712729	827	Autosome	Chr_2	n.a.	n.a.	n.a.	n.a.	n.a.	n.a.	n.a.	n.a.	n.a.	n.a.	n.a.	n.a.	n.a.	n.a.
Smp_148520	Chr_2	14633402	3868	Autosome	Chr_2	n.a.	n.a.	n.a.	n.a.	n.a.	n.a.	n.a.	n.a.	n.a.	n.a.	n.a.	n.a.	n.a.	n.a.
Smp_148810	Chr_4.unplaced.SC_0032	1733832	4381	Autosome	Chr_UP	n.a.	n.a.	n.a.	n.a.	n.a.	n.a.	n.a.	n.a.	n.a.	n.a.	n.a.	n.a.	n.a.	n.a.
Smp_148840	Chr_4.unplaced.SC_0032	1642634	859	Autosome	Chr_UP	n.a.	n.a.	n.a.	n.a.	n.a.	n.a.	n.a.	n.a.	n.a.	n.a.	n.a.	n.a.	n.a.	n.a.
Smp_149190	Chr_4	25038784	4095	Autosome	Chr_4	n.a.	n.a.	n.a.	n.a.	n.a.	n.a.	n.a.	n.a.	n.a.	n.a.	n.a.	n.a.	n.a.	n.a.
Smp_149940	Chr_4	3439475	74	Autosome	Chr_4	n.a.	n.a.	n.a.	n.a.	n.a.	n.a.	n.a.	n.a.	n.a.	n.a.	n.a.	n.a.	n.a.	n.a.
Smp_150000	Chr_4	3167599	845	Autosome	Chr_4	n.a.	n.a.	n.a.	n.a.	n.a.	n.a.	n.a.	n.a.	n.a.	n.a.	n.a.	n.a.	n.a.	n.a.
Smp_150330	Chr_2	23246412	50	Autosome	Chr_2	n.a.	n.a.	n.a.	n.a.	n.a.	n.a.	n.a.	n.a.	n.a.	n.a.	n.a.	n.a.	n.a.	n.a.
Smp_150540	Chr_5	1691103	224	Autosome	Chr_5	n.a.	n.a.	n.a.	n.a.	n.a.	n.a.	n.a.	n.a.	n.a.	n.a.	n.a.	n.a.	n.a.	n.a.
Smp_150700	SC_0041	302194	16608	Autosome	Chr_UP	n.a.	n.a.	n.a.	n.a.	n.a.	n.a.	n.a.	n.a.	n.a.	n.a.	n.a.	n.a.	n.a.	n.a.
Smp_150920	SC_0150	247306	17714	Autosome	Chr_UP	n.a.	n.a.	n.a.	n.a.	n.a.	n.a.	n.a.	n.a.	n.a.	n.a.	n.a.	n.a.	n.a.	n.a.
Smp_151130	SC_0166	414392	392	Autosome	Chr_UP	n.a.	n.a.	n.a.	n.a.	n.a.	n.a.	n.a.	n.a.	n.a.	n.a.	n.a.	n.a.	n.a.	n.a.
Smp_151170	Chr_1	17509636	845	Autosome	Chr_1	n.a.	n.a.	n.a.	n.a.	n.a.	n.a.	n.a.	n.a.	n.a.	n.a.	n.a.	n.a.	n.a.	n.a.
Smp_151200	Chr_ZW	41761245	452	Autosome	Chr_PSA	n.a.	n.a.	n.a.	n.a.	n.a.	n.a.	n.a.	n.a.	n.a.	n.a.	n.a.	n.a.	n.a.	n.a.
Smp_151340	SC_0214	47639	20	Autosome	Chr_UP	n.a.	n.a.	n.a.	n.a.	n.a.	n.a.	n.a.	n.a.	n.a.	n.a.	n.a.	n.a.	n.a.	n.a.
Smp_152040	Chr_1	62223382	641	Autosome	Chr_1	n.a.	n.a.	n.a.	n.a.	n.a.	n.a.	n.a.	n.a.	n.a.	n.a.	n.a.	n.a.	n.a.	n.a.
Smp_152360	Chr_ZW	22873562	945	Autosome	Chr_PSA	n.a.	n.a.	n.a.	n.a.	n.a.	n.a.	n.a.	n.a.	n.a.	n.a.	n.a.	n.a.	n.a.	n.a.
Smp_152580	SC_0097	577432	14770	Autosome	Chr_UP	n.a.	n.a.	n.a.	n.a.	n.a.	n.a.	n.a.	n.a.	n.a.	n.a.	n.a.	n.a.	n.a.	n.a.
Smp_152590	SC_0097	472316	3966	Autosome	Chr_UP	n.a.	n.a.	n.a.	n.a.	n.a.	n.a.	n.a.	n.a.	n.a.	n.a.	n.a.	n.a.	n.a.	n.a.
Smp_152600	SC_0097	362498	7344	Autosome	Chr_UP	n.a.	n.a.	n.a.	n.a.	n.a.	n.a.	n.a.	n.a.	n.a.	n.a.	n.a.	n.a.	n.a.	n.a.
Smp_152630	SC_0097	246235	9849	Autosome	Chr_UP	n.a.	n.a.	n.a.	n.a.	n.a.	n.a.	n.a.	n.a.	n.a.	n.a.	n.a.	n.a.	n.a.	n.a.
Smp_152700	SC_0225	127626	2136	Autosome	Chr_UP	n.a.	n.a.	n.a.	n.a.	n.a.	n.a.	n.a.	n.a.	n.a.	n.a.	n.a.	n.a.	n.a.	n.a.
Smp_152720	Chr_1	31378688	2006	Autosome	Chr_1	n.a.	n.a.	n.a.	n.a.	n.a.	n.a.	Sha_C9776974	n.a.	Chr_1	0	0	n.a.	n.a.	n.a.
Smp_152920	Chr_7	5407186	2613	Autosome	Chr_7	n.a.	n.a.	n.a.	n.a.	n.a.	n.a.	n.a.	n.a.	n.a.	n.a.	n.a.	n.a.	n.a.	n.a.
Smp_153110	Chr_ZW	47811277	3630	Autosome	Chr_PSA	n.a.	n.a.	n.a.	n.a.	n.a.	n.a.	n.a.	n.a.	n.a.	n.a.	n.a.	n.a.	n.a.	n.a.
Smp_153330	Chr_5	2269461	1224	Autosome	Chr_5	n.a.	n.a.	n.a.	n.a.	n.a.	n.a.	n.a.	n.a.	n.a.	n.a.	n.a.	n.a.	n.a.	n.a.
Smp_153400	Chr_5	2501272	4139	Autosome	Chr_5	n.a.	n.a.	n.a.	n.a.	n.a.	n.a.	n.a.	n.a.	n.a.	n.a.	n.a.	n.a.	n.a.	n.a.
Smp_153800	Chr_4	15209999	287	Autosome	Chr_4	n.a.	n.a.	n.a.	n.a.	n.a.	n.a.	n.a.	n.a.	n.a.	n.a.	n.a.	n.a.	n.a.	n.a.
Smp_154130	Chr_6	10512882	2231	Autosome	Chr_6	n.a.	n.a.	n.a.	n.a.	n.a.	n.a.	n.a.	n.a.	n.a.	n.a.	n.a.	n.a.	n.a.	n.a.
Smp_154190	Chr_3.unplaced.SC_0105	158175	1456	Autosome	Chr_UP	n.a.	n.a.	n.a.	n.a.	n.a.	n.a.	Sha_C10029243	n.a.	Chr_UP	0	0	n.a.	n.a.	n.a.
Smp_154290	Chr_6	12380635	2695	Autosome	Chr_6	n.a.	n.a.	n.a.	n.a.	n.a.	n.a.	n.a.	n.a.	n.a.	n.a.	n.a.	n.a.	n.a.	n.a.
Smp_154570	Chr_5	916774	825	Autosome	Chr_5	n.a.	n.a.	n.a.	n.a.	n.a.	n.a.	n.a.	n.a.	n.a.	n.a.	n.a.	n.a.	n.a.	n.a.
Smp_154710	Chr_1	53224326	3253	Autosome	Chr_1	n.a.	n.a.	n.a.	n.a.	n.a.	n.a.	n.a.	n.a.	n.a.	n.a.	n.a.	n.a.	n.a.	n.a.
Smp_155110	Chr_ZW	55472156	3421	Autosome	Chr_PSA	n.a.	n.a.	n.a.	n.a.	n.a.	n.a.	n.a.	n.a.	n.a.	n.a.	n.a.	n.a.	n.a.	n.a.
Smp_155150	SC_0279	86314	3259	Autosome	Chr_UP	n.a.	n.a.	n.a.	n.a.	n.a.	n.a.	n.a.	n.a.	n.a.	n.a.	n.a.	n.a.	n.a.	n.a.
Smp_155160	Chr_5	8316390	1513	Autosome	Chr_5	n.a.	n.a.	n.a.	n.a.	n.a.	n.a.	n.a.	n.a.	n.a.	n.a.	n.a.	n.a.	n.a.	n.a.
Smp_155190	Chr_5	8405372	1203	Autosome	Chr_5	n.a.	n.a.	n.a.	n.a.	n.a.	n.a.	n.a.	n.a.	n.a.	n.a.	n.a.	n.a.	n.a.	n.a.
Smp_155530	SC_0154	289872	12081	Autosome	Chr_UP	n.a.	n.a.	n.a.	n.a.	n.a.	n.a.	n.a.	n.a.	n.a.	n.a.	n.a.	n.a.	n.a.	n.a.
Smp_155560	SC_0154	170109	7457	Autosome	Chr_UP	n.a.	n.a.	n.a.	n.a.	n.a.	n.a.	n.a.	n.a.	n.a.	n.a.	n.a.	n.a.	n.a.	n.a.
Smp_155640	Chr_2.unplaced.SC_0213	151075	7514	Autosome	Chr_UP	n.a.	n.a.	n.a.	n.a.	n.a.	n.a.	n.a.	n.a.	n.a.	n.a.	n.a.	n.a.	n.a.	n.a.
Smp_155710	Chr_7	174569	845	Autosome	Chr_7	n.a.	n.a.	n.a.	n.a.	n.a.	n.a.	n.a.	n.a.	n.a.	n.a.	n.a.	n.a.	n.a.	n.a.
Smp_156050	Chr_4	537270	1556	Autosome	Chr_4	n.a.	n.a.	n.a.	n.a.	n.a.	n.a.	n.a.	n.a.	n.a.	n.a.	n.a.	n.a.	n.a.	n.a.
Smp_156200	Chr_6	13304454	4122	Autosome	Chr_6	n.a.	n.a.	n.a.	n.a.	n.a.	n.a.	n.a.	n.a.	n.a.	n.a.	n.a.	n.a.	n.a.	n.a.
Smp_156560	SC_0203	252520	6288	Autosome	Chr_UP	n.a.	n.a.	n.a.	n.a.	n.a.	n.a.	n.a.	n.a.	n.a.	n.a.	n.a.	n.a.	n.a.	n.a.
Smp_156700	Chr_2	19575945	5359	Autosome	Chr_2	n.a.	n.a.	n.a.	n.a.	n.a.	n.a.	n.a.	n.a.	n.a.	n.a.	n.a.	n.a.	n.a.	n.a.
Smp_156830	SC_0298	27736	10378	Autosome	Chr_UP	n.a.	n.a.	n.a.	n.a.	n.a.	n.a.	n.a.	n.a.	n.a.	n.a.	n.a.	n.a.	n.a.	n.a.
Smp_157030	Chr_ZW	1772218	845	Autosome	Chr_PSA	n.a.	n.a.	n.a.	n.a.	n.a.	n.a.	n.a.	n.a.	n.a.	n.a.	n.a.	n.a.	n.a.	n.a.
Smp_157580	Chr_3	6928082	188	Autosome	Chr_3	n.a.	n.a.	n.a.	n.a.	n.a.	n.a.	n.a.	n.a.	n.a.	n.a.	n.a.	n.a.	n.a.	n.a.
Smp_158110	Chr_1.unplaced.SC_0094	423651	1356	Autosome	Chr_UP	n.a.	n.a.	n.a.	n.a.	n.a.	n.a.	n.a.	n.a.	n.a.	n.a.	n.a.	n.a.	n.a.	n.a.
Smp_158420	Chr_1	889167	3720	Autosome	Chr_1	n.a.	n.a.	n.a.	n.a.	n.a.	n.a.	n.a.	n.a.	n.a.	n.a.	n.a.	n.a.	n.a.	n.a.
Smp_158530	Chr_1	53314890	555	Autosome	Chr_1	n.a.	n.a.	n.a.	n.a.	n.a.	n.a.	n.a.	n.a.	n.a.	n.a.	n.a.	n.a.	n.a.	n.a.
Smp_158540	Chr_1	53315535	1664	Autosome	Chr_1	n.a.	n.a.	n.a.	n.a.	n.a.	n.a.	n.a.	n.a.	n.a.	n.a.	n.a.	n.a.	n.a.	n.a.
Smp_158890	Chr_4	981938	16748	Autosome	Chr_4	n.a.	n.a.	n.a.	n.a.	n.a.	n.a.	n.a.	n.a.	n.a.	n.a.	n.a.	n.a.	n.a.	n.a.
Smp_158980	SC_0167	321218	6501	Autosome	Chr_UP	n.a.	n.a.	n.a.	n.a.	n.a.	n.a.	n.a.	n.a.	n.a.	n.a.	n.a.	n.a.	n.a.	n.a.
Smp_159290	Chr_6	9477248	1581	Autosome	Chr_6	n.a.	n.a.	n.a.	n.a.	n.a.	n.a.	n.a.	n.a.	n.a.	n.a.	n.a.	n.a.	n.a.	n.a.
Smp_159460	Chr_ZW	38734762	20721	Autosome	Chr_PSA	n.a.	n.a.	n.a.	n.a.	n.a.	n.a.	n.a.	n.a.	n.a.	n.a.	n.a.	n.a.	n.a.	n.a.
Smp_159610	Chr_6	11268332	845	Autosome	Chr_6	n.a.	n.a.	n.a.	n.a.	n.a.	n.a.	n.a.	n.a.	n.a.	n.a.	n.a.	n.a.	n.a.	n.a.
Smp_159650	SC_0156	639197	3461	Autosome	Chr_UP	n.a.	n.a.	n.a.	n.a.	n.a.	n.a.	n.a.	n.a.	n.a.	n.a.	n.a.	n.a.	n.a.	n.a.
Smp_159800	SC_0255	145838	9372	Autosome	Chr_UP	n.a.	n.a.	n.a.	n.a.	n.a.	n.a.	n.a.	n.a.	n.a.	n.a.	n.a.	n.a.	n.a.	n.a.
Smp_159830	SC_0223	22953	8518	Autosome	Chr_UP	n.a.	n.a.	n.a.	n.a.	n.a.	n.a.	n.a.	n.a.	n.a.	n.a.	n.a.	n.a.	n.a.	n.a.
Smp_160230	Chr_4	18081356	840	Autosome	Chr_4	n.a.	n.a.	n.a.	n.a.	n.a.	n.a.	n.a.	n.a.	n.a.	n.a.	n.a.	n.a.	n.a.	n.a.
Smp_160250	Chr_6	13048593	17693	Autosome	Chr_6	n.a.	n.a.	n.a.	n.a.	n.a.	n.a.	n.a.	n.a.	n.a.	n.a.	n.a.	n.a.	n.a.	n.a.
Smp_160300	Chr_ZW	56659184	7614	Autosome	Chr_PSA	n.a.	n.a.	n.a.	n.a.	n.a.	n.a.	n.a.	n.a.	n.a.	n.a.	n.a.	n.a.	n.a.	n.a.
Smp_160340	Chr_ZW	56441185	11429	Autosome	Chr_PSA	n.a.	n.a.	n.a.	n.a.	n.a.	n.a.	n.a.	n.a.	n.a.	n.a.	n.a.	n.a.	n.a.	n.a.
Smp_160660	Chr_7	3641367	44	Autosome	Chr_7	n.a.	n.a.	n.a.	n.a.	n.a.	n.a.	n.a.	n.a.	n.a.	n.a.	n.a.	n.a.	n.a.	n.a.
Smp_160720	Chr_1	43475504	845	Autosome	Chr_1	n.a.	n.a.	n.a.	n.a.	n.a.	n.a.	n.a.	n.a.	n.a.	n.a.	n.a.	n.a.	n.a.	n.a.
Smp_160990	Chr_1	23009541	845	Autosome	Chr_1	n.a.	n.a.	n.a.	n.a.	n.a.	n.a.	n.a.	n.a.	n.a.	n.a.	n.a.	n.a.	n.a.	n.a.
Smp_161200	Chr_2	23244855	53	Autosome	Chr_2	n.a.	n.a.	n.a.	n.a.	n.a.	n.a.	n.a.	n.a.	n.a.	n.a.	n.a.	n.a.	n.a.	n.a.
Smp_161340	Chr_1	51496155	5281	Autosome	Chr_1	n.a.	n.a.	n.a.	n.a.	n.a.	n.a.	n.a.	n.a.	n.a.	n.a.	n.a.	n.a.	n.a.	n.a.
Smp_161460	Chr_1	55556455	1212	Autosome	Chr_1	n.a.	n.a.	n.a.	n.a.	n.a.	n.a.	n.a.	n.a.	n.a.	n.a.	n.a.	n.a.	n.a.	n.a.
Smp_161690	Chr_1	24896039	833	Autosome	Chr_1	n.a.	n.a.	n.a.	n.a.	n.a.	n.a.	n.a.	n.a.	n.a.	n.a.	n.a.	n.a.	n.a.	n.a.
Smp_161760	Chr_1	25272503	1902	Autosome	Chr_1	n.a.	n.a.	n.a.	n.a.	n.a.	n.a.	n.a.	n.a.	n.a.	n.a.	n.a.	n.a.	n.a.	n.a.
Smp_161880	Chr_ZW	53786711	1130	Autosome	Chr_PSA	n.a.	n.a.	n.a.	n.a.	n.a.	n.a.	n.a.	n.a.	n.a.	n.a.	n.a.	n.a.	n.a.	n.a.
Smp_161930	Chr_ZW	54377183	1545	Autosome	Chr_PSA	n.a.	n.a.	n.a.	n.a.	n.a.	n.a.	n.a.	n.a.	n.a.	n.a.	n.a.	n.a.	n.a.	n.a.
Smp_161950	Chr_1	10168971	362	Autosome	Chr_1	n.a.	n.a.	n.a.	n.a.	n.a.	n.a.	n.a.	n.a.	n.a.	n.a.	n.a.	n.a.	n.a.	n.a.
Smp_162070	SC_0172	15345	956	Autosome	Chr_UP	n.a.	n.a.	n.a.	n.a.	n.a.	n.a.	n.a.	n.a.	n.a.	n.a.	n.a.	n.a.	n.a.	n.a.
Smp_162160	Chr_6	258618	12839	Autosome	Chr_6	n.a.	n.a.	n.a.	n.a.	n.a.	n.a.	n.a.	n.a.	n.a.	n.a.	n.a.	n.a.	n.a.	n.a.
Smp_162530	Chr_3	7596445	278	Autosome	Chr_3	n.a.	n.a.	n.a.	n.a.	n.a.	n.a.	n.a.	n.a.	n.a.	n.a.	n.a.	n.a.	n.a.	n.a.
Smp_162700	Chr_3	6826568	2308	Autosome	Chr_3	n.a.	n.a.	n.a.	n.a.	n.a.	n.a.	n.a.	n.a.	n.a.	n.a.	n.a.	n.a.	n.a.	n.a.
Smp_162850	Chr_ZW.unplaced.SC_0185	185308	1244	Autosome	Chr_UP	n.a.	n.a.	n.a.	n.a.	n.a.	n.a.	n.a.	n.a.	n.a.	n.a.	n.a.	n.a.	n.a.	n.a.
Smp_162950	Chr_ZW	55885170	782	Autosome	Chr_PSA	n.a.	n.a.	n.a.	n.a.	n.a.	n.a.	n.a.	n.a.	n.a.	n.a.	n.a.	n.a.	n.a.	n.a.
Smp_163150	Chr_ZW	53499494	95	Autosome	Chr_PSA	n.a.	n.a.	n.a.	n.a.	n.a.	n.a.	n.a.	n.a.	n.a.	n.a.	n.a.	n.a.	n.a.	n.a.
Smp_163370	SC_0149	177682	1433	Autosome	Chr_UP	n.a.	n.a.	n.a.	n.a.	n.a.	n.a.	n.a.	n.a.	n.a.	n.a.	n.a.	n.a.	n.a.	n.a.
Smp_163440	Chr_1	11815968	2314	Autosome	Chr_1	n.a.	n.a.	n.a.	n.a.	n.a.	n.a.	n.a.	n.a.	n.a.	n.a.	n.a.	n.a.	n.a.	n.a.
Smp_163590	SC_0013	3309964	14214	Autosome	Chr_UP	n.a.	n.a.	n.a.	n.a.	n.a.	n.a.	n.a.	n.a.	n.a.	n.a.	n.a.	n.a.	n.a.	n.a.
Smp_163630	Chr_1	11777473	28179	Autosome	Chr_1	n.a.	n.a.	n.a.	n.a.	n.a.	n.a.	n.a.	n.a.	n.a.	n.a.	n.a.	n.a.	n.a.	n.a.
Smp_163710	Chr_ZW	59221949	33012	Autosome	Chr_PSA	n.a.	n.a.	n.a.	n.a.	n.a.	n.a.	n.a.	n.a.	n.a.	n.a.	n.a.	n.a.	n.a.	n.a.
Smp_163800	Chr_ZW	58458662	1106	Autosome	Chr_PSA	n.a.	n.a.	n.a.	n.a.	n.a.	n.a.	n.a.	n.a.	n.a.	n.a.	n.a.	n.a.	n.a.	n.a.
Smp_164290	Chr_7	8581452	5894	Autosome	Chr_7	n.a.	n.a.	n.a.	n.a.	n.a.	n.a.	n.a.	n.a.	n.a.	n.a.	n.a.	n.a.	n.a.	n.a.
Smp_164310	SC_0179	209474	1269	Autosome	Chr_UP	n.a.	n.a.	n.a.	n.a.	n.a.	n.a.	n.a.	n.a.	n.a.	n.a.	n.a.	n.a.	n.a.	n.a.
Smp_164350	Chr_6	7051135	281	Autosome	Chr_6	n.a.	n.a.	n.a.	n.a.	n.a.	n.a.	n.a.	n.a.	n.a.	n.a.	n.a.	n.a.	n.a.	n.a.
Smp_164460	SC_0138	175361	50	Autosome	Chr_UP	n.a.	n.a.	n.a.	n.a.	n.a.	n.a.	n.a.	n.a.	n.a.	n.a.	n.a.	n.a.	n.a.	n.a.
Smp_164480	Chr_1.unplaced.SC_0076	261206	695	Autosome	Chr_UP	n.a.	n.a.	n.a.	n.a.	n.a.	n.a.	n.a.	n.a.	n.a.	n.a.	n.a.	n.a.	n.a.	n.a.
Smp_164530	Chr_1	54416544	95	Autosome	Chr_1	n.a.	n.a.	n.a.	n.a.	n.a.	n.a.	n.a.	n.a.	n.a.	n.a.	n.a.	n.a.	n.a.	n.a.
Smp_164570	Chr_3	17582335	686	Autosome	Chr_3	n.a.	n.a.	n.a.	n.a.	n.a.	n.a.	n.a.	n.a.	n.a.	n.a.	n.a.	n.a.	n.a.	n.a.
Smp_164710	Chr_1.unplaced.SC_0094	656715	269	Autosome	Chr_UP	n.a.	n.a.	n.a.	n.a.	n.a.	n.a.	n.a.	n.a.	n.a.	n.a.	n.a.	n.a.	n.a.	n.a.
Smp_165110	Chr_3	17087532	2569	Autosome	Chr_3	n.a.	n.a.	n.a.	n.a.	n.a.	n.a.	n.a.	n.a.	n.a.	n.a.	n.a.	n.a.	n.a.	n.a.
Smp_165180	Chr_3	17363591	681	Autosome	Chr_3	n.a.	n.a.	n.a.	n.a.	n.a.	n.a.	n.a.	n.a.	n.a.	n.a.	n.a.	n.a.	n.a.	n.a.
Smp_165300	Chr_4	20926881	679	Autosome	Chr_4	n.a.	n.a.	n.a.	n.a.	n.a.	n.a.	n.a.	n.a.	n.a.	n.a.	n.a.	n.a.	n.a.	n.a.
Smp_165600	SC_0212	78181	3811	Autosome	Chr_UP	n.a.	n.a.	n.a.	n.a.	n.a.	n.a.	n.a.	n.a.	n.a.	n.a.	n.a.	n.a.	n.a.	n.a.
Smp_165690	Chr_6	6844633	251	Autosome	Chr_6	n.a.	n.a.	n.a.	n.a.	n.a.	n.a.	n.a.	n.a.	n.a.	n.a.	n.a.	n.a.	n.a.	n.a.
Smp_166080	Chr_1.unplaced.SC_0135	408316	18874	Autosome	Chr_UP	n.a.	n.a.	n.a.	n.a.	n.a.	n.a.	n.a.	n.a.	n.a.	n.a.	n.a.	n.a.	n.a.	n.a.
Smp_166100	Chr_1.unplaced.SC_0135	458733	777	Autosome	Chr_UP	n.a.	n.a.	n.a.	n.a.	n.a.	n.a.	n.a.	n.a.	n.a.	n.a.	n.a.	n.a.	n.a.	n.a.
Smp_166700	Chr_7	7830978	4378	Autosome	Chr_7	n.a.	n.a.	n.a.	n.a.	n.a.	n.a.	n.a.	n.a.	n.a.	n.a.	n.a.	n.a.	n.a.	n.a.
Smp_166710	Chr_7	7849109	6470	Autosome	Chr_7	n.a.	n.a.	n.a.	n.a.	n.a.	n.a.	n.a.	n.a.	n.a.	n.a.	n.a.	n.a.	n.a.	n.a.
Smp_166720	Chr_7	7985479	4454	Autosome	Chr_7	n.a.	n.a.	n.a.	n.a.	n.a.	n.a.	n.a.	n.a.	n.a.	n.a.	n.a.	n.a.	n.a.	n.a.
Smp_166730	Chr_7	8029961	2212	Autosome	Chr_7	n.a.	n.a.	n.a.	n.a.	n.a.	n.a.	n.a.	n.a.	n.a.	n.a.	n.a.	n.a.	n.a.	n.a.
Smp_166740	Chr_7	8105508	12067	Autosome	Chr_7	n.a.	n.a.	n.a.	n.a.	n.a.	n.a.	n.a.	n.a.	n.a.	n.a.	n.a.	n.a.	n.a.	n.a.
Smp_166850	Chr_3.unplaced.SC_0077	783266	296	Autosome	Chr_UP	n.a.	n.a.	n.a.	n.a.	n.a.	n.a.	n.a.	n.a.	n.a.	n.a.	n.a.	n.a.	n.a.	n.a.
Smp_166860	SC_0224	39199	21703	Autosome	Chr_UP	n.a.	n.a.	n.a.	n.a.	n.a.	n.a.	n.a.	n.a.	n.a.	n.a.	n.a.	n.a.	n.a.	n.a.
Smp_166870	SC_0224	64681	1915	Autosome	Chr_UP	n.a.	n.a.	n.a.	n.a.	n.a.	n.a.	n.a.	n.a.	n.a.	n.a.	n.a.	n.a.	n.a.	n.a.
Smp_167070	SC_0132	377843	12816	Autosome	Chr_UP	n.a.	n.a.	n.a.	n.a.	n.a.	n.a.	n.a.	n.a.	n.a.	n.a.	n.a.	n.a.	n.a.	n.a.
Smp_167130	SC_0132	99405	15838	Autosome	Chr_UP	n.a.	n.a.	n.a.	n.a.	n.a.	n.a.	n.a.	n.a.	n.a.	n.a.	n.a.	n.a.	n.a.	n.a.
Smp_167490	SC_0037	1241291	8540	Autosome	Chr_UP	n.a.	n.a.	n.a.	n.a.	n.a.	n.a.	n.a.	n.a.	n.a.	n.a.	n.a.	n.a.	n.a.	n.a.
Smp_167530	SC_0037	1350866	1024	Autosome	Chr_UP	n.a.	n.a.	n.a.	n.a.	n.a.	n.a.	n.a.	n.a.	n.a.	n.a.	n.a.	n.a.	n.a.	n.a.
Smp_167560	SC_0037	1420748	1090	Autosome	Chr_UP	n.a.	n.a.	n.a.	n.a.	n.a.	n.a.	n.a.	n.a.	n.a.	n.a.	n.a.	n.a.	n.a.	n.a.
Smp_167710	Chr_3.unplaced.SC_0044	2147456	1394	Autosome	Chr_UP	n.a.	n.a.	n.a.	n.a.	n.a.	n.a.	n.a.	n.a.	n.a.	n.a.	n.a.	n.a.	n.a.	n.a.
Smp_167720	Chr_3.unplaced.SC_0044	2141406	845	Autosome	Chr_UP	n.a.	n.a.	n.a.	n.a.	n.a.	n.a.	n.a.	n.a.	n.a.	n.a.	n.a.	n.a.	n.a.	n.a.
Smp_167760	Chr_ZW	46735710	469	Autosome	Chr_PSA	n.a.	n.a.	n.a.	n.a.	n.a.	n.a.	n.a.	n.a.	n.a.	n.a.	n.a.	n.a.	n.a.	n.a.
Smp_167830	Chr_1	3123822	302	Autosome	Chr_1	n.a.	n.a.	n.a.	n.a.	n.a.	n.a.	Sha_C10104399	n.a.	Chr_1	0	0	n.a.	n.a.	n.a.
Smp_167840	Chr_ZW	55427591	380	Autosome	Chr_PSA	n.a.	n.a.	n.a.	n.a.	n.a.	n.a.	n.a.	n.a.	n.a.	n.a.	n.a.	n.a.	n.a.	n.a.
Smp_167990	Chr_3.unplaced.SC_0083	610486	218	Autosome	Chr_UP	n.a.	n.a.	n.a.	n.a.	n.a.	n.a.	n.a.	n.a.	n.a.	n.a.	n.a.	n.a.	n.a.	n.a.
Smp_168290	Chr_1	1164964	335	Autosome	Chr_1	n.a.	n.a.	n.a.	n.a.	n.a.	n.a.	n.a.	n.a.	n.a.	n.a.	n.a.	n.a.	n.a.	n.a.
Smp_168300	Chr_1	1136276	1935	Autosome	Chr_1	n.a.	n.a.	n.a.	n.a.	n.a.	n.a.	n.a.	n.a.	n.a.	n.a.	n.a.	n.a.	n.a.	n.a.
Smp_168430	SC_0247	47775	323	Autosome	Chr_UP	n.a.	n.a.	n.a.	n.a.	n.a.	n.a.	n.a.	n.a.	n.a.	n.a.	n.a.	n.a.	n.a.	n.a.
Smp_168470	Chr_7	6525129	3731	Autosome	Chr_7	n.a.	n.a.	n.a.	n.a.	n.a.	n.a.	n.a.	n.a.	n.a.	n.a.	n.a.	n.a.	n.a.	n.a.
Smp_168510	Chr_ZW	47517333	77	Autosome	Chr_PSA	n.a.	n.a.	n.a.	n.a.	n.a.	n.a.	n.a.	n.a.	n.a.	n.a.	n.a.	n.a.	n.a.	n.a.
Smp_168740	Chr_6	6712322	143	Autosome	Chr_6	n.a.	n.a.	n.a.	n.a.	n.a.	n.a.	n.a.	n.a.	n.a.	n.a.	n.a.	n.a.	n.a.	n.a.
Smp_169810	Chr_3	16770705	536	Autosome	Chr_3	n.a.	n.a.	n.a.	n.a.	n.a.	n.a.	n.a.	n.a.	n.a.	n.a.	n.a.	n.a.	n.a.	n.a.
Smp_170180	SC_0049	269235	77	Autosome	Chr_UP	n.a.	n.a.	n.a.	n.a.	n.a.	n.a.	n.a.	n.a.	n.a.	n.a.	n.a.	n.a.	n.a.	n.a.
Smp_170370	Chr_2	1680559	5453	Autosome	Chr_2	n.a.	n.a.	n.a.	n.a.	n.a.	n.a.	n.a.	n.a.	n.a.	n.a.	n.a.	n.a.	n.a.	n.a.
Smp_170420	Chr_2	1484322	840	Autosome	Chr_2	n.a.	n.a.	n.a.	n.a.	n.a.	n.a.	n.a.	n.a.	n.a.	n.a.	n.a.	n.a.	n.a.	n.a.
Smp_170460	Chr_2	22179665	206	Autosome	Chr_2	n.a.	n.a.	n.a.	n.a.	n.a.	n.a.	n.a.	n.a.	n.a.	n.a.	n.a.	n.a.	n.a.	n.a.
Smp_170490	Chr_2	22220515	20405	Autosome	Chr_2	n.a.	n.a.	n.a.	n.a.	n.a.	n.a.	n.a.	n.a.	n.a.	n.a.	n.a.	n.a.	n.a.	n.a.
Smp_170830	Chr_6	1315832	994	Autosome	Chr_6	n.a.	n.a.	n.a.	n.a.	n.a.	n.a.	n.a.	n.a.	n.a.	n.a.	n.a.	n.a.	n.a.	n.a.
Smp_170850	Chr_6	1343362	1836	Autosome	Chr_6	n.a.	n.a.	n.a.	n.a.	n.a.	n.a.	n.a.	n.a.	n.a.	n.a.	n.a.	n.a.	n.a.	n.a.
[truncated: 11,278 more rows]
