# Supplementary material for: Evolution of gene dosage on the Z-chromosome of schistosome parasites
Source: eLife. 2018 Jul 25;7:e35684. doi: 10.7554/eLife.35684 (PMC6089595; doi:10.7554/eLife.35684)
Supplement: Figure 1—source data 2. [file elife-35684-fig1-data2.xlsx]

## Sheet: Figure 1-source data 2
Figure 1-source data 2: S. mansoni reference species: coverage analysis and Z-Autosome assignment
Scaffold / Chromosome_ID_mans	SoapCoverage output per 10Kb windows				Z:Autosome assignment based on F:M ratio of coverage	Z:Autosome assignment without ambiguity	Assignated location of contained genes, used for bestlocation input* *see BigTable_Genomics
	Window_start	Window_stop	Male_Cov_mans	Female_Cov_mans
Chr_1	1	10000	31.231	20.6649	Z	Excluded	Chr_UP
Chr_1	10001	20000	21.5979	12.4185	Z	Excluded	Chr_UP
Chr_1	20001	30000	11.9416	7.615	Z	Excluded	Chr_UP
Chr_1	30001	40000	0.4577	0.8648	Autosome	Excluded	Chr_UP
Chr_1	40001	50000	16.254	14.4419	Autosome	Autosome	Chr_1
Chr_1	50001	60000	24.5898	24.2415	Autosome	Autosome	Chr_1
Chr_1	60001	70000	22.5856	22.3682	Autosome	Autosome	Chr_1
Chr_1	70001	80000	21.4234	20.3132	Autosome	Autosome	Chr_1
Chr_1	80001	90000	17.0015	15.501	Autosome	Autosome	Chr_1
Chr_1	90001	100000	24.8776	24.6094	Autosome	Autosome	Chr_1
Chr_1	100001	110000	20.4038	17.75	Autosome	Autosome	Chr_1
Chr_1	110001	120000	17.4291	17.7915	Autosome	Autosome	Chr_1
Chr_1	120001	130000	19.8335	18.0531	Autosome	Autosome	Chr_1
Chr_1	130001	140000	20.5722	18.9232	Autosome	Autosome	Chr_1
Chr_1	140001	150000	14.1635	14.2061	Autosome	Autosome	Chr_1
Chr_1	150001	160000	25.3393	24.34	Autosome	Autosome	Chr_1
Chr_1	160001	170000	15.6821	19.6837	Autosome	Autosome	Chr_1
Chr_1	170001	180000	21.9014	22.681	Autosome	Autosome	Chr_1
Chr_1	180001	190000	16.6787	16.5763	Autosome	Autosome	Chr_1
Chr_1	190001	200000	19.0502	20.4085	Autosome	Autosome	Chr_1
Chr_1	200001	210000	21.8034	20.2655	Autosome	Autosome	Chr_1
Chr_1	210001	220000	20.0233	18.0885	Autosome	Autosome	Chr_1
Chr_1	220001	230000	23.1768	22.1243	Autosome	Autosome	Chr_1
Chr_1	230001	240000	10.8941	14.9	Autosome	Autosome	Chr_1
Chr_1	240001	250000	19.5892	18.9586	Autosome	Autosome	Chr_1
Chr_1	250001	260000	16.4045	19.0521	Autosome	Autosome	Chr_1
Chr_1	260001	270000	20.4358	21.0969	Autosome	Autosome	Chr_1
Chr_1	270001	280000	19.7752	20.3978	Autosome	Autosome	Chr_1
Chr_1	280001	290000	19.4896	20.9495	Autosome	Autosome	Chr_1
Chr_1	290001	300000	16.454	17.2692	Autosome	Autosome	Chr_1
Chr_1	300001	310000	23.0365	23.2768	Autosome	Autosome	Chr_1
Chr_1	310001	320000	20.8087	24.5769	Autosome	Autosome	Chr_1
Chr_1	320001	330000	13.9644	14.6413	Autosome	Autosome	Chr_1
Chr_1	330001	340000	14.8079	14.1924	Autosome	Autosome	Chr_1
Chr_1	340001	350000	22.4513	21.8876	Autosome	Autosome	Chr_1
Chr_1	350001	360000	23.3164	23.3948	Autosome	Autosome	Chr_1
Chr_1	360001	370000	18.5007	19.9077	Autosome	Autosome	Chr_1
Chr_1	370001	380000	16.895	15.5793	Autosome	Autosome	Chr_1
Chr_1	380001	390000	21.928	22.6022	Autosome	Autosome	Chr_1
Chr_1	390001	400000	18.6602	17.6965	Autosome	Autosome	Chr_1
Chr_1	400001	410000	27.3918	26.0983	Autosome	Autosome	Chr_1
Chr_1	410001	420000	27.3248	26.755	Autosome	Autosome	Chr_1
Chr_1	420001	430000	24.2762	22.2959	Autosome	Autosome	Chr_1
Chr_1	430001	440000	19.9195	19.1692	Autosome	Autosome	Chr_1
Chr_1	440001	450000	22.8216	22.2094	Autosome	Autosome	Chr_1
Chr_1	450001	460000	23.765	25.0339	Autosome	Autosome	Chr_1
Chr_1	460001	470000	15.6561	14.156	Autosome	Autosome	Chr_1
Chr_1	470001	480000	12.3723	13.9302	Autosome	Autosome	Chr_1
Chr_1	480001	490000	16.7328	17.5162	Autosome	Autosome	Chr_1
Chr_1	490001	500000	16.3858	19.0189	Autosome	Autosome	Chr_1
Chr_1	500001	510000	20.9668	21.4675	Autosome	Autosome	Chr_1
Chr_1	510001	520000	22.4195	24.3613	Autosome	Autosome	Chr_1
Chr_1	520001	530000	27.4238	25.6741	Autosome	Autosome	Chr_1
Chr_1	530001	540000	24.0335	22.6801	Autosome	Autosome	Chr_1
Chr_1	540001	550000	20.2817	21.3344	Autosome	Autosome	Chr_1
Chr_1	550001	560000	21.2699	21.0309	Autosome	Autosome	Chr_1
Chr_1	560001	570000	15.0394	16.0545	Autosome	Autosome	Chr_1
Chr_1	570001	580000	15.6843	12.4523	Autosome	Autosome	Chr_1
Chr_1	580001	590000	19.1496	21.6867	Autosome	Autosome	Chr_1
Chr_1	590001	600000	22.5444	22.0842	Autosome	Autosome	Chr_1
Chr_1	600001	610000	13.4997	12.0889	Autosome	Excluded	Chr_UP
Chr_1	610001	620000	30.666	13.8965	Z	Excluded	Chr_UP
Chr_1	620001	630000	18.9344	12.3143	Z	Excluded	Chr_UP
Chr_1	630001	640000	12.4168	13.0973	Autosome	Excluded	Chr_UP
Chr_1	640001	650000	7.4283	7.0831	Autosome	Autosome	Chr_1
Chr_1	650001	660000	15.9707	17.2248	Autosome	Autosome	Chr_1
Chr_1	660001	670000	18.1124	20.3582	Autosome	Autosome	Chr_1
Chr_1	670001	680000	22.9089	24.9236	Autosome	Autosome	Chr_1
Chr_1	680001	690000	7.2164	8.4469	Autosome	Autosome	Chr_1
Chr_1	690001	700000	24.1429	23.5764	Autosome	Autosome	Chr_1
Chr_1	700001	710000	18.3866	20.2733	Autosome	Autosome	Chr_1
Chr_1	710001	720000	16.7046	18.0913	Autosome	Autosome	Chr_1
Chr_1	720001	730000	17.0372	16.4376	Autosome	Autosome	Chr_1
Chr_1	730001	740000	21.2657	19.5381	Autosome	Autosome	Chr_1
Chr_1	740001	750000	24.9327	22.7678	Autosome	Autosome	Chr_1
Chr_1	750001	760000	20.2321	20.2715	Autosome	Autosome	Chr_1
Chr_1	760001	770000	21.0677	21.7497	Autosome	Autosome	Chr_1
Chr_1	770001	780000	20.2271	19.2538	Autosome	Autosome	Chr_1
Chr_1	780001	790000	19.2178	18.6734	Autosome	Autosome	Chr_1
Chr_1	790001	800000	20.0482	19.9133	Autosome	Autosome	Chr_1
Chr_1	800001	810000	20.7194	19.5036	Autosome	Autosome	Chr_1
Chr_1	810001	820000	27.1563	29.3989	Autosome	Autosome	Chr_1
Chr_1	820001	830000	22.1432	22.0618	Autosome	Autosome	Chr_1
Chr_1	830001	840000	16.4604	17.5884	Autosome	Autosome	Chr_1
Chr_1	840001	850000	27.1269	27.9617	Autosome	Autosome	Chr_1
Chr_1	850001	860000	21.9877	22.6673	Autosome	Autosome	Chr_1
Chr_1	860001	870000	12.4142	15.3376	Autosome	Autosome	Chr_1
Chr_1	870001	880000	21.4881	22.6877	Autosome	Autosome	Chr_1
Chr_1	880001	890000	20.5917	18.4284	Autosome	Autosome	Chr_1
Chr_1	890001	900000	18.2194	18.8026	Autosome	Autosome	Chr_1
Chr_1	900001	910000	10.0963	11.2241	Autosome	Autosome	Chr_1
Chr_1	910001	920000	4.4019	3.5608	Autosome	Autosome	Chr_1
Chr_1	920001	930000	7.795	8.4516	Autosome	Autosome	Chr_1
Chr_1	930001	940000	6.0933	5.4617	Autosome	Autosome	Chr_1
Chr_1	940001	950000	10.9327	12.0755	Autosome	Autosome	Chr_1
Chr_1	950001	960000	21.1055	19.801	Autosome	Autosome	Chr_1
Chr_1	960001	970000	14.4971	17.7599	Autosome	Autosome	Chr_1
Chr_1	970001	980000	13.4546	13.6935	Autosome	Autosome	Chr_1
Chr_1	980001	990000	1.8292	2.2675	Autosome	Autosome	Chr_1
Chr_1	990001	1000000	0.1578	0.382	Autosome	Autosome	Chr_1
Chr_1	1000001	1010000	0.0991	0.1414	Autosome	Excluded	Chr_UP
Chr_1	1010001	1020000	0.485	0.3459	Z	Excluded	Chr_UP
Chr_1	1020001	1030000	0.378	0.5437	Autosome	Excluded	Chr_UP
Chr_1	1030001	1040000	2.2464	2.3858	Autosome	Autosome	Chr_1
Chr_1	1040001	1050000	3.418	3.5228	Autosome	Autosome	Chr_1
Chr_1	1050001	1060000	4.3487	4.9675	Autosome	Autosome	Chr_1
Chr_1	1060001	1070000	5.4096	6.2903	Autosome	Autosome	Chr_1
Chr_1	1070001	1080000	4.7127	4.0436	Autosome	Autosome	Chr_1
Chr_1	1080001	1090000	21.3127	25.2151	Autosome	Autosome	Chr_1
Chr_1	1090001	1100000	18.5529	20.1814	Autosome	Autosome	Chr_1
Chr_1	1100001	1110000	2.4284	2.4855	Autosome	Autosome	Chr_1
Chr_1	1110001	1120000	27.9405	30.6735	Autosome	Autosome	Chr_1
Chr_1	1120001	1130000	24.804	29.2039	Autosome	Autosome	Chr_1
Chr_1	1130001	1140000	21.8396	24.1582	Autosome	Autosome	Chr_1
Chr_1	1140001	1150000	24.1331	23.1811	Autosome	Autosome	Chr_1
Chr_1	1150001	1160000	18.5904	19.1577	Autosome	Autosome	Chr_1
Chr_1	1160001	1170000	21.1954	19.4933	Autosome	Autosome	Chr_1
Chr_1	1170001	1180000	18.5088	21.18	Autosome	Autosome	Chr_1
Chr_1	1180001	1190000	21.7761	23.6392	Autosome	Autosome	Chr_1
Chr_1	1190001	1200000	178.435	189.564	Autosome	Autosome	Chr_1
Chr_1	1200001	1210000	21.555	18.9481	Autosome	Autosome	Chr_1
Chr_1	1210001	1220000	17.6576	13.606	Autosome	Autosome	Chr_1
Chr_1	1220001	1230000	24.4666	29.929	Autosome	Autosome	Chr_1
Chr_1	1230001	1240000	20.8293	22.8003	Autosome	Autosome	Chr_1
Chr_1	1240001	1250000	18.1636	20.7089	Autosome	Autosome	Chr_1
Chr_1	1250001	1260000	18.5762	17.6684	Autosome	Autosome	Chr_1
Chr_1	1260001	1270000	18.2973	20.095	Autosome	Autosome	Chr_1
Chr_1	1270001	1280000	19.9124	22.32	Autosome	Autosome	Chr_1
Chr_1	1280001	1290000	23.4005	21.3629	Autosome	Autosome	Chr_1
Chr_1	1290001	1300000	28.5836	31.8503	Autosome	Autosome	Chr_1
Chr_1	1300001	1310000	26.5853	26.3455	Autosome	Autosome	Chr_1
Chr_1	1310001	1320000	22.8191	21.3085	Autosome	Autosome	Chr_1
Chr_1	1320001	1330000	20.8566	19.5593	Autosome	Autosome	Chr_1
Chr_1	1330001	1340000	26.1443	24.4236	Autosome	Autosome	Chr_1
Chr_1	1340001	1350000	23.4471	23.9535	Autosome	Autosome	Chr_1
Chr_1	1350001	1360000	27.9663	26.2804	Autosome	Autosome	Chr_1
Chr_1	1360001	1370000	20.3156	18.0505	Autosome	Autosome	Chr_1
Chr_1	1370001	1380000	26.452	25.748	Autosome	Autosome	Chr_1
Chr_1	1380001	1390000	23.5858	19.4845	Autosome	Autosome	Chr_1
Chr_1	1390001	1400000	21.2764	21.2447	Autosome	Autosome	Chr_1
Chr_1	1400001	1410000	15.7483	16.9661	Autosome	Autosome	Chr_1
Chr_1	1410001	1420000	23.6829	20.205	Autosome	Autosome	Chr_1
Chr_1	1420001	1430000	23.0508	23.3641	Autosome	Autosome	Chr_1
Chr_1	1430001	1440000	23.8385	19.8127	Autosome	Autosome	Chr_1
Chr_1	1440001	1450000	23.922	20.0688	Autosome	Autosome	Chr_1
Chr_1	1450001	1460000	21.8791	20.4957	Autosome	Autosome	Chr_1
Chr_1	1460001	1470000	20.3512	18.3481	Autosome	Autosome	Chr_1
Chr_1	1470001	1480000	20.655	22.4902	Autosome	Autosome	Chr_1
Chr_1	1480001	1490000	21.4812	22.1862	Autosome	Autosome	Chr_1
Chr_1	1490001	1500000	26.3573	29.6319	Autosome	Autosome	Chr_1
Chr_1	1500001	1510000	27.9588	27.6891	Autosome	Autosome	Chr_1
Chr_1	1510001	1520000	20.6634	22.9277	Autosome	Autosome	Chr_1
Chr_1	1520001	1530000	22.9267	25.4051	Autosome	Autosome	Chr_1
Chr_1	1530001	1540000	23.3101	24.6348	Autosome	Autosome	Chr_1
Chr_1	1540001	1550000	25.5703	24.7289	Autosome	Autosome	Chr_1
Chr_1	1550001	1560000	23.1956	23.2283	Autosome	Autosome	Chr_1
Chr_1	1560001	1570000	20.9719	20.8088	Autosome	Autosome	Chr_1
Chr_1	1570001	1580000	22.6843	22.9717	Autosome	Autosome	Chr_1
Chr_1	1580001	1590000	22.0749	19.2435	Autosome	Autosome	Chr_1
Chr_1	1590001	1600000	15.7452	15.0048	Autosome	Autosome	Chr_1
Chr_1	1600001	1610000	19.2037	19.4366	Autosome	Autosome	Chr_1
Chr_1	1610001	1620000	24.6061	23.5685	Autosome	Autosome	Chr_1
Chr_1	1620001	1630000	4.1988	5.8108	Autosome	Autosome	Chr_1
Chr_1	1630001	1640000	11.9933	13.2449	Autosome	Autosome	Chr_1
Chr_1	1640001	1650000	8.2712	8.0754	Autosome	Autosome	Chr_1
Chr_1	1650001	1660000	15.6305	20.1458	Autosome	Autosome	Chr_1
Chr_1	1660001	1670000	18.3853	17.467	Autosome	Autosome	Chr_1
Chr_1	1670001	1680000	21.0011	19.1781	Autosome	Autosome	Chr_1
Chr_1	1680001	1690000	12.0316	10.969	Autosome	Autosome	Chr_1
Chr_1	1690001	1700000	24.3034	22.2024	Autosome	Autosome	Chr_1
Chr_1	1700001	1710000	22.4067	24.4648	Autosome	Autosome	Chr_1
Chr_1	1710001	1720000	3.9716	3.9532	Autosome	Autosome	Chr_1
Chr_1	1720001	1730000	24.299	24.3878	Autosome	Autosome	Chr_1
Chr_1	1730001	1740000	14.4146	17.3171	Autosome	Autosome	Chr_1
Chr_1	1740001	1750000	18.4914	16.4751	Autosome	Autosome	Chr_1
Chr_1	1750001	1760000	23.8572	24.8847	Autosome	Autosome	Chr_1
Chr_1	1760001	1770000	18.8266	17.679	Autosome	Autosome	Chr_1
Chr_1	1770001	1780000	25.7169	26.1834	Autosome	Autosome	Chr_1
Chr_1	1780001	1790000	23.4836	24.2096	Autosome	Autosome	Chr_1
Chr_1	1790001	1800000	20.9251	18.5134	Autosome	Autosome	Chr_1
Chr_1	1800001	1810000	25.5684	27.3265	Autosome	Autosome	Chr_1
Chr_1	1810001	1820000	24.943	28.2585	Autosome	Autosome	Chr_1
Chr_1	1820001	1830000	8.2312	10.5415	Autosome	Autosome	Chr_1
Chr_1	1830001	1840000	13.6817	14.1895	Autosome	Autosome	Chr_1
Chr_1	1840001	1850000	25.9546	23.6018	Autosome	Autosome	Chr_1
Chr_1	1850001	1860000	9.7997	8.4731	Autosome	Autosome	Chr_1
Chr_1	1860001	1870000	22.5733	18.6748	Autosome	Autosome	Chr_1
Chr_1	1870001	1880000	25.6841	24.161	Autosome	Autosome	Chr_1
Chr_1	1880001	1890000	23.3872	24.9621	Autosome	Autosome	Chr_1
Chr_1	1890001	1900000	13.0857	14.2553	Autosome	Autosome	Chr_1
Chr_1	1900001	1910000	21.2575	19.285	Autosome	Autosome	Chr_1
Chr_1	1910001	1920000	20.8795	20.9029	Autosome	Autosome	Chr_1
Chr_1	1920001	1930000	9.8418	10.4041	Autosome	Autosome	Chr_1
Chr_1	1930001	1940000	22.1692	20.8044	Autosome	Autosome	Chr_1
Chr_1	1940001	1950000	17.4724	16.5608	Autosome	Autosome	Chr_1
Chr_1	1950001	1960000	22.5634	21.222	Autosome	Autosome	Chr_1
Chr_1	1960001	1970000	26.5603	23.7392	Autosome	Autosome	Chr_1
Chr_1	1970001	1980000	21.3474	20.4755	Autosome	Autosome	Chr_1
Chr_1	1980001	1990000	14.4222	14.3937	Autosome	Autosome	Chr_1
Chr_1	1990001	2000000	25.2138	22.9565	Autosome	Autosome	Chr_1
Chr_1	2000001	2010000	18.2036	17.2933	Autosome	Autosome	Chr_1
Chr_1	2010001	2020000	28.551	25.9822	Autosome	Autosome	Chr_1
Chr_1	2020001	2030000	23.8481	23.6663	Autosome	Autosome	Chr_1
Chr_1	2030001	2040000	25.7748	27.2517	Autosome	Autosome	Chr_1
Chr_1	2040001	2050000	21.3656	20.0582	Autosome	Autosome	Chr_1
Chr_1	2050001	2060000	22.9278	25.0621	Autosome	Autosome	Chr_1
Chr_1	2060001	2070000	20.2221	20.3196	Autosome	Autosome	Chr_1
Chr_1	2070001	2080000	19.7209	19.7103	Autosome	Autosome	Chr_1
Chr_1	2080001	2090000	15.1651	13.567	Autosome	Autosome	Chr_1
Chr_1	2090001	2100000	21.621	22.6131	Autosome	Autosome	Chr_1
Chr_1	2100001	2110000	20.8566	26.6046	Autosome	Autosome	Chr_1
Chr_1	2110001	2120000	15.808	15.5929	Autosome	Autosome	Chr_1
Chr_1	2120001	2130000	18.7822	21.947	Autosome	Autosome	Chr_1
Chr_1	2130001	2140000	11.9855	15.1177	Autosome	Autosome	Chr_1
Chr_1	2140001	2150000	23.9219	28.9255	Autosome	Autosome	Chr_1
Chr_1	2150001	2160000	23.5191	22.6651	Autosome	Autosome	Chr_1
Chr_1	2160001	2170000	13.5995	14.6268	Autosome	Autosome	Chr_1
Chr_1	2170001	2180000	20.2649	19.9283	Autosome	Autosome	Chr_1
Chr_1	2180001	2190000	21.3523	21.4835	Autosome	Autosome	Chr_1
Chr_1	2190001	2200000	27.8905	27.7699	Autosome	Autosome	Chr_1
Chr_1	2200001	2210000	20.5434	22.0943	Autosome	Autosome	Chr_1
Chr_1	2210001	2220000	20.7526	22.4001	Autosome	Autosome	Chr_1
Chr_1	2220001	2230000	14.7906	13.6247	Autosome	Autosome	Chr_1
Chr_1	2230001	2240000	17.8195	17.3353	Autosome	Autosome	Chr_1
Chr_1	2240001	2250000	23.694	24.6257	Autosome	Autosome	Chr_1
Chr_1	2250001	2260000	20.0965	18.6141	Autosome	Autosome	Chr_1
Chr_1	2260001	2270000	21.8792	22.0308	Autosome	Autosome	Chr_1
Chr_1	2270001	2280000	19.4053	16.7371	Autosome	Autosome	Chr_1
Chr_1	2280001	2290000	23.5126	22.2655	Autosome	Autosome	Chr_1
Chr_1	2290001	2300000	24.6571	22.2361	Autosome	Autosome	Chr_1
Chr_1	2300001	2310000	22.5097	22.0734	Autosome	Autosome	Chr_1
Chr_1	2310001	2320000	13.7604	13.7144	Autosome	Autosome	Chr_1
Chr_1	2320001	2330000	23.3619	20.906	Autosome	Autosome	Chr_1
Chr_1	2330001	2340000	22.9515	20.539	Autosome	Autosome	Chr_1
Chr_1	2340001	2350000	26.5665	26.1253	Autosome	Autosome	Chr_1
Chr_1	2350001	2360000	24.3608	29.0492	Autosome	Autosome	Chr_1
Chr_1	2360001	2370000	20.7839	23.4006	Autosome	Autosome	Chr_1
Chr_1	2370001	2380000	25.5914	27.6443	Autosome	Autosome	Chr_1
Chr_1	2380001	2390000	26.3827	28.0366	Autosome	Autosome	Chr_1
Chr_1	2390001	2400000	24.7928	24.26	Autosome	Autosome	Chr_1
Chr_1	2400001	2410000	24.607	24.4297	Autosome	Autosome	Chr_1
Chr_1	2410001	2420000	24.7594	21.8361	Autosome	Autosome	Chr_1
Chr_1	2420001	2430000	23.0198	19.0069	Autosome	Autosome	Chr_1
Chr_1	2430001	2440000	19.2598	24.2682	Autosome	Autosome	Chr_1
Chr_1	2440001	2450000	23.1047	26.0555	Autosome	Autosome	Chr_1
Chr_1	2450001	2460000	17.1257	18.8029	Autosome	Autosome	Chr_1
Chr_1	2460001	2470000	20.4997	21.1087	Autosome	Autosome	Chr_1
Chr_1	2470001	2480000	24.0078	19.9522	Autosome	Autosome	Chr_1
Chr_1	2480001	2490000	21.3538	23.0555	Autosome	Autosome	Chr_1
Chr_1	2490001	2500000	19.404	20.7636	Autosome	Autosome	Chr_1
Chr_1	2500001	2510000	11.719	12.891	Autosome	Autosome	Chr_1
Chr_1	2510001	2520000	15.7191	17.8027	Autosome	Autosome	Chr_1
Chr_1	2520001	2530000	19.5154	18.281	Autosome	Autosome	Chr_1
Chr_1	2530001	2540000	25.4532	25.3038	Autosome	Autosome	Chr_1
Chr_1	2540001	2550000	25.0999	26.3992	Autosome	Autosome	Chr_1
Chr_1	2550001	2560000	27.8676	24.0038	Autosome	Autosome	Chr_1
Chr_1	2560001	2570000	22.0256	23.1271	Autosome	Autosome	Chr_1
Chr_1	2570001	2580000	9.5645	13.1528	Autosome	Autosome	Chr_1
Chr_1	2580001	2590000	25.2746	25.3348	Autosome	Autosome	Chr_1
Chr_1	2590001	2600000	17.6999	18.403	Autosome	Autosome	Chr_1
Chr_1	2600001	2610000	14.7721	13.815	Autosome	Autosome	Chr_1
Chr_1	2610001	2620000	20.6664	23.4016	Autosome	Autosome	Chr_1
Chr_1	2620001	2630000	25.5696	27.1674	Autosome	Autosome	Chr_1
Chr_1	2630001	2640000	17.2131	20.1184	Autosome	Autosome	Chr_1
Chr_1	2640001	2650000	10.3325	8.4919	Autosome	Autosome	Chr_1
Chr_1	2650001	2660000	18.9139	17.2749	Autosome	Autosome	Chr_1
Chr_1	2660001	2670000	20.9976	19.3197	Autosome	Autosome	Chr_1
Chr_1	2670001	2680000	20.178	19.4147	Autosome	Autosome	Chr_1
Chr_1	2680001	2690000	17.9432	18.983	Autosome	Autosome	Chr_1
Chr_1	2690001	2700000	22.6349	20.5466	Autosome	Autosome	Chr_1
Chr_1	2700001	2710000	20.5116	19.4437	Autosome	Autosome	Chr_1
Chr_1	2710001	2720000	10.6393	9.9366	Autosome	Autosome	Chr_1
Chr_1	2720001	2730000	14.92	15.0135	Autosome	Autosome	Chr_1
Chr_1	2730001	2740000	16.334	21.5791	Autosome	Autosome	Chr_1
Chr_1	2740001	2750000	19.049	16.7308	Autosome	Autosome	Chr_1
Chr_1	2750001	2760000	23.5743	25.2232	Autosome	Autosome	Chr_1
Chr_1	2760001	2770000	27.4876	24.4397	Autosome	Autosome	Chr_1
Chr_1	2770001	2780000	25.063	27.2486	Autosome	Autosome	Chr_1
Chr_1	2780001	2790000	14.0837	15.6676	Autosome	Autosome	Chr_1
Chr_1	2790001	2800000	25.0208	28.6214	Autosome	Autosome	Chr_1
Chr_1	2800001	2810000	30.3064	29.7751	Autosome	Autosome	Chr_1
Chr_1	2810001	2820000	21.467	19.2579	Autosome	Autosome	Chr_1
Chr_1	2820001	2830000	13.2566	13.0697	Autosome	Autosome	Chr_1
Chr_1	2830001	2840000	24.3117	25.556	Autosome	Autosome	Chr_1
Chr_1	2840001	2850000	13.9269	12.6262	Autosome	Autosome	Chr_1
Chr_1	2850001	2860000	16.4527	17.8425	Autosome	Autosome	Chr_1
Chr_1	2860001	2870000	18.3453	19.6391	Autosome	Autosome	Chr_1
Chr_1	2870001	2880000	13.5734	14.5574	Autosome	Autosome	Chr_1
Chr_1	2880001	2890000	18.8695	18.1903	Autosome	Autosome	Chr_1
Chr_1	2890001	2900000	20.1803	21.1183	Autosome	Autosome	Chr_1
Chr_1	2900001	2910000	21.7013	22.5253	Autosome	Autosome	Chr_1
Chr_1	2910001	2920000	21.2137	20.3352	Autosome	Autosome	Chr_1
Chr_1	2920001	2930000	16.2787	15.043	Autosome	Autosome	Chr_1
Chr_1	2930001	2940000	19.9274	19.7261	Autosome	Autosome	Chr_1
Chr_1	2940001	2950000	25.3588	24.9892	Autosome	Autosome	Chr_1
Chr_1	2950001	2960000	13.5251	12.7845	Autosome	Autosome	Chr_1
Chr_1	2960001	2970000	18.8961	18.1927	Autosome	Autosome	Chr_1
Chr_1	2970001	2980000	19.2774	21.0952	Autosome	Autosome	Chr_1
Chr_1	2980001	2990000	22.0896	20.1958	Autosome	Autosome	Chr_1
Chr_1	2990001	3000000	18.9311	18.6279	Autosome	Autosome	Chr_1
Chr_1	3000001	3010000	19.5453	21.0876	Autosome	Autosome	Chr_1
Chr_1	3010001	3020000	19.0062	18.1898	Autosome	Autosome	Chr_1
Chr_1	3020001	3030000	20.9628	16.8736	Autosome	Autosome	Chr_1
Chr_1	3030001	3040000	20.9731	22.2668	Autosome	Autosome	Chr_1
Chr_1	3040001	3050000	29.1656	30.5218	Autosome	Autosome	Chr_1
Chr_1	3050001	3060000	22.4371	24.9311	Autosome	Autosome	Chr_1
Chr_1	3060001	3070000	0.8167	0.8362	Autosome	Autosome	Chr_1
Chr_1	3070001	3080000	0.2707	0.2933	Autosome	Autosome	Chr_1
Chr_1	3080001	3090000	0.149	0.5675	Autosome	Autosome	Chr_1
Chr_1	3090001	3100000	2.6663	2.6997	Autosome	Autosome	Chr_1
Chr_1	3100001	3110000	22.6988	23.2976	Autosome	Autosome	Chr_1
Chr_1	3110001	3120000	55.5288	55.8995	Autosome	Autosome	Chr_1
Chr_1	3120001	3130000	26.4161	28.5394	Autosome	Autosome	Chr_1
Chr_1	3130001	3140000	20.162	21.3554	Autosome	Autosome	Chr_1
Chr_1	3140001	3150000	13.8732	14.5609	Autosome	Autosome	Chr_1
Chr_1	3150001	3160000	5.9036	7.0086	Autosome	Autosome	Chr_1
Chr_1	3160001	3170000	19.5258	18.6621	Autosome	Autosome	Chr_1
Chr_1	3170001	3180000	22.9695	21.9178	Autosome	Autosome	Chr_1
Chr_1	3180001	3190000	28.9956	27.0641	Autosome	Autosome	Chr_1
Chr_1	3190001	3200000	22.9141	23.7545	Autosome	Autosome	Chr_1
Chr_1	3200001	3210000	15.8322	20.1847	Autosome	Autosome	Chr_1
Chr_1	3210001	3220000	20.675	20.8535	Autosome	Autosome	Chr_1
Chr_1	3220001	3230000	14.4403	14.2491	Autosome	Autosome	Chr_1
Chr_1	3230001	3240000	18.0781	18.2232	Autosome	Autosome	Chr_1
Chr_1	3240001	3250000	24.1907	23.9502	Autosome	Autosome	Chr_1
Chr_1	3250001	3260000	20.111	21.2711	Autosome	Autosome	Chr_1
Chr_1	3260001	3270000	15.6989	16.6115	Autosome	Autosome	Chr_1
Chr_1	3270001	3280000	12.027	12.272	Autosome	Autosome	Chr_1
Chr_1	3280001	3290000	21.1989	22.7081	Autosome	Autosome	Chr_1
Chr_1	3290001	3300000	22.8364	21.5735	Autosome	Autosome	Chr_1
Chr_1	3300001	3310000	20.3008	18.6828	Autosome	Autosome	Chr_1
Chr_1	3310001	3320000	20.7317	19.4414	Autosome	Autosome	Chr_1
Chr_1	3320001	3330000	19.5531	18.3672	Autosome	Autosome	Chr_1
Chr_1	3330001	3340000	17.9182	18.3695	Autosome	Autosome	Chr_1
Chr_1	3340001	3350000	16.2128	15.7976	Autosome	Autosome	Chr_1
Chr_1	3350001	3360000	19.6555	19.1391	Autosome	Autosome	Chr_1
Chr_1	3360001	3370000	18.2372	17.6074	Autosome	Autosome	Chr_1
Chr_1	3370001	3380000	21.8409	24.2114	Autosome	Autosome	Chr_1
Chr_1	3380001	3390000	24.3031	28.4839	Autosome	Autosome	Chr_1
Chr_1	3390001	3400000	27.7167	24.3313	Autosome	Autosome	Chr_1
Chr_1	3400001	3410000	8.5262	9.6674	Autosome	Autosome	Chr_1
Chr_1	3410001	3420000	23.1301	21.983	Autosome	Autosome	Chr_1
Chr_1	3420001	3430000	21.0438	23.3089	Autosome	Autosome	Chr_1
Chr_1	3430001	3440000	19.568	22.0335	Autosome	Autosome	Chr_1
Chr_1	3440001	3450000	20.9419	18.1189	Autosome	Autosome	Chr_1
Chr_1	3450001	3460000	23.6951	25.1038	Autosome	Autosome	Chr_1
Chr_1	3460001	3470000	26.3324	26.2199	Autosome	Autosome	Chr_1
Chr_1	3470001	3480000	24.0039	20.7373	Autosome	Autosome	Chr_1
Chr_1	3480001	3490000	23.6676	21.4194	Autosome	Autosome	Chr_1
Chr_1	3490001	3500000	20.8988	18.7294	Autosome	Autosome	Chr_1
Chr_1	3500001	3510000	27.3939	21.4998	Autosome	Autosome	Chr_1
Chr_1	3510001	3520000	24.0955	24.1523	Autosome	Autosome	Chr_1
Chr_1	3520001	3530000	22.1451	21.4407	Autosome	Autosome	Chr_1
Chr_1	3530001	3540000	23.2639	25.5658	Autosome	Autosome	Chr_1
Chr_1	3540001	3550000	25.7619	23.0563	Autosome	Autosome	Chr_1
Chr_1	3550001	3560000	17.514	16.4451	Autosome	Autosome	Chr_1
Chr_1	3560001	3570000	17.6236	15.7141	Autosome	Autosome	Chr_1
Chr_1	3570001	3580000	24.0069	20.469	Autosome	Autosome	Chr_1
Chr_1	3580001	3590000	22.453	24.5112	Autosome	Autosome	Chr_1
Chr_1	3590001	3600000	19.1473	18.3307	Autosome	Autosome	Chr_1
Chr_1	3600001	3610000	17.9759	16.5871	Autosome	Autosome	Chr_1
Chr_1	3610001	3620000	14.4942	15.3395	Autosome	Autosome	Chr_1
Chr_1	3620001	3630000	20.2172	19.6985	Autosome	Autosome	Chr_1
Chr_1	3630001	3640000	23.7661	21.7891	Autosome	Autosome	Chr_1
Chr_1	3640001	3650000	20.4703	22.1852	Autosome	Autosome	Chr_1
Chr_1	3650001	3660000	17.2812	14.2223	Autosome	Autosome	Chr_1
Chr_1	3660001	3670000	17.713	19.9154	Autosome	Autosome	Chr_1
Chr_1	3670001	3680000	19.013	17.3469	Autosome	Autosome	Chr_1
Chr_1	3680001	3690000	19.676	19.822	Autosome	Autosome	Chr_1
Chr_1	3690001	3700000	20.7752	22.3293	Autosome	Autosome	Chr_1
Chr_1	3700001	3710000	19.6531	20.0283	Autosome	Autosome	Chr_1
Chr_1	3710001	3720000	19.6531	17.6531	Autosome	Autosome	Chr_1
Chr_1	3720001	3730000	18.3615	17.027	Autosome	Autosome	Chr_1
Chr_1	3730001	3740000	19.5266	18.4353	Autosome	Autosome	Chr_1
Chr_1	3740001	3750000	23.2347	26.2181	Autosome	Autosome	Chr_1
Chr_1	3750001	3760000	20.3106	19.1748	Autosome	Autosome	Chr_1
Chr_1	3760001	3770000	17.2701	15.8987	Autosome	Autosome	Chr_1
Chr_1	3770001	3780000	25.7553	20.0961	Autosome	Autosome	Chr_1
Chr_1	3780001	3790000	18.6244	16.9037	Autosome	Autosome	Chr_1
Chr_1	3790001	3800000	23.8516	20.7982	Autosome	Autosome	Chr_1
Chr_1	3800001	3810000	18.1645	14.6096	Autosome	Autosome	Chr_1
Chr_1	3810001	3820000	18.6609	16.1559	Autosome	Excluded	Chr_UP
Chr_1	3820001	3830000	13.862	10.3263	Z	Excluded	Chr_UP
Chr_1	3830001	3840000	23.2746	20.9623	Autosome	Excluded	Chr_UP
Chr_1	3840001	3850000	16.4316	16.4426	Autosome	Autosome	Chr_1
Chr_1	3850001	3860000	27.1282	27.7875	Autosome	Autosome	Chr_1
Chr_1	3860001	3870000	23.6884	22.5693	Autosome	Autosome	Chr_1
Chr_1	3870001	3880000	17.7887	19.0598	Autosome	Autosome	Chr_1
Chr_1	3880001	3890000	18.8814	16.7115	Autosome	Autosome	Chr_1
Chr_1	3890001	3900000	20.9419	18.6575	Autosome	Autosome	Chr_1
Chr_1	3900001	3910000	20.1191	19.9838	Autosome	Autosome	Chr_1
Chr_1	3910001	3920000	9.9144	12.0127	Autosome	Autosome	Chr_1
Chr_1	3920001	3930000	28.7631	27.6965	Autosome	Autosome	Chr_1
Chr_1	3930001	3940000	19.895	19.2442	Autosome	Autosome	Chr_1
Chr_1	3940001	3950000	16.2744	14.9552	Autosome	Autosome	Chr_1
Chr_1	3950001	3960000	16.9958	16.3912	Autosome	Autosome	Chr_1
Chr_1	3960001	3970000	29.4689	29.7157	Autosome	Autosome	Chr_1
Chr_1	3970001	3980000	16.9855	16.6798	Autosome	Autosome	Chr_1
Chr_1	3980001	3990000	19.2344	20.4441	Autosome	Autosome	Chr_1
Chr_1	3990001	4000000	15.3396	15.0573	Autosome	Autosome	Chr_1
Chr_1	4000001	4010000	10.5283	10.9644	Autosome	Autosome	Chr_1
Chr_1	4010001	4020000	20.8491	19.6009	Autosome	Autosome	Chr_1
Chr_1	4020001	4030000	16.3859	18.9948	Autosome	Autosome	Chr_1
Chr_1	4030001	4040000	28.4084	24.9916	Autosome	Autosome	Chr_1
Chr_1	4040001	4050000	24.2069	23.5168	Autosome	Autosome	Chr_1
Chr_1	4050001	4060000	18.5459	20.8127	Autosome	Autosome	Chr_1
Chr_1	4060001	4070000	38.4108	39.6687	Autosome	Autosome	Chr_1
Chr_1	4070001	4080000	19.2705	19.8869	Autosome	Autosome	Chr_1
Chr_1	4080001	4090000	18.7368	20.9863	Autosome	Autosome	Chr_1
Chr_1	4090001	4100000	19.8076	21.4858	Autosome	Autosome	Chr_1
Chr_1	4100001	4110000	21.0298	21.8337	Autosome	Autosome	Chr_1
Chr_1	4110001	4120000	25.2962	22.1347	Autosome	Autosome	Chr_1
Chr_1	4120001	4130000	25.5333	23.6011	Autosome	Autosome	Chr_1
Chr_1	4130001	4140000	11.9108	11.977	Autosome	Autosome	Chr_1
Chr_1	4140001	4150000	13.9586	14.0495	Autosome	Autosome	Chr_1
Chr_1	4150001	4160000	9.3665	10.8507	Autosome	Autosome	Chr_1
Chr_1	4160001	4170000	15.2301	15.8177	Autosome	Autosome	Chr_1
Chr_1	4170001	4180000	14.629	16.0414	Autosome	Autosome	Chr_1
Chr_1	4180001	4190000	19.9947	22.2604	Autosome	Autosome	Chr_1
Chr_1	4190001	4200000	13.8072	11.0819	Autosome	Autosome	Chr_1
Chr_1	4200001	4210000	20.5658	21.3448	Autosome	Autosome	Chr_1
Chr_1	4210001	4220000	16.2257	18.7125	Autosome	Autosome	Chr_1
Chr_1	4220001	4230000	15.865	13.6419	Autosome	Autosome	Chr_1
Chr_1	4230001	4240000	19.7608	17.572	Autosome	Autosome	Chr_1
Chr_1	4240001	4250000	16.7064	15.6655	Autosome	Autosome	Chr_1
Chr_1	4250001	4260000	21.9299	20.6343	Autosome	Autosome	Chr_1
Chr_1	4260001	4270000	20.7393	18.2523	Autosome	Autosome	Chr_1
Chr_1	4270001	4280000	24.1948	23.8967	Autosome	Autosome	Chr_1
Chr_1	4280001	4290000	18.162	18.2186	Autosome	Autosome	Chr_1
Chr_1	4290001	4300000	14.8785	15.5984	Autosome	Autosome	Chr_1
Chr_1	4300001	4310000	21.7461	23.971	Autosome	Autosome	Chr_1
Chr_1	4310001	4320000	20.5997	21.1107	Autosome	Autosome	Chr_1
Chr_1	4320001	4330000	16.9189	15.7037	Autosome	Autosome	Chr_1
Chr_1	4330001	4340000	17.1172	15.4268	Autosome	Autosome	Chr_1
Chr_1	4340001	4350000	16.8053	14.6356	Autosome	Autosome	Chr_1
Chr_1	4350001	4360000	16.5024	16.7676	Autosome	Autosome	Chr_1
Chr_1	4360001	4370000	15.0067	17.7333	Autosome	Autosome	Chr_1
Chr_1	4370001	4380000	13.8876	15.1077	Autosome	Autosome	Chr_1
Chr_1	4380001	4390000	16.7497	15.828	Autosome	Autosome	Chr_1
Chr_1	4390001	4400000	21.3895	21.1463	Autosome	Autosome	Chr_1
Chr_1	4400001	4410000	17.3599	17.6033	Autosome	Autosome	Chr_1
Chr_1	4410001	4420000	15.4	16.0119	Autosome	Autosome	Chr_1
Chr_1	4420001	4430000	17.63	18.1474	Autosome	Autosome	Chr_1
Chr_1	4430001	4440000	18.0856	15.0516	Autosome	Autosome	Chr_1
Chr_1	4440001	4450000	19.1892	16.9914	Autosome	Autosome	Chr_1
Chr_1	4450001	4460000	21.5813	19.2322	Autosome	Autosome	Chr_1
Chr_1	4460001	4470000	17.6955	19.1514	Autosome	Autosome	Chr_1
Chr_1	4470001	4480000	25.0873	25.1082	Autosome	Autosome	Chr_1
Chr_1	4480001	4490000	11.6834	12.8198	Autosome	Autosome	Chr_1
Chr_1	4490001	4500000	21.9588	22.4958	Autosome	Autosome	Chr_1
Chr_1	4500001	4510000	27.9317	31.7179	Autosome	Autosome	Chr_1
Chr_1	4510001	4520000	28.29	25.2256	Autosome	Autosome	Chr_1
Chr_1	4520001	4530000	20.5856	19.9667	Autosome	Autosome	Chr_1
Chr_1	4530001	4540000	22.2193	22.7225	Autosome	Autosome	Chr_1
Chr_1	4540001	4550000	19.1398	18.8949	Autosome	Excluded	Chr_UP
Chr_1	4550001	4560000	13.8659	5.9315	Z	Excluded	Chr_UP
Chr_1	4560001	4570000	14.0364	4.6203	Z	Excluded	Chr_UP
Chr_1	4570001	4580000	13.6729	12.8073	Autosome	Excluded	Chr_UP
Chr_1	4580001	4590000	22.4548	20.7008	Autosome	Autosome	Chr_1
Chr_1	4590001	4600000	14.4527	15.7436	Autosome	Autosome	Chr_1
Chr_1	4600001	4610000	18.0297	17.8669	Autosome	Autosome	Chr_1
Chr_1	4610001	4620000	16.8912	18.268	Autosome	Autosome	Chr_1
Chr_1	4620001	4630000	19.3809	21.3142	Autosome	Autosome	Chr_1
Chr_1	4630001	4640000	18.4423	20.698	Autosome	Autosome	Chr_1
Chr_1	4640001	4650000	14.5811	14.5815	Autosome	Autosome	Chr_1
Chr_1	4650001	4660000	21.379	21.8344	Autosome	Autosome	Chr_1
Chr_1	4660001	4670000	22.8067	23.9594	Autosome	Autosome	Chr_1
Chr_1	4670001	4680000	21.393	20.1575	Autosome	Autosome	Chr_1
Chr_1	4680001	4690000	15.0564	14.7859	Autosome	Autosome	Chr_1
Chr_1	4690001	4700000	12.3121	10.2572	Autosome	Autosome	Chr_1
Chr_1	4700001	4710000	8.8668	10.5897	Autosome	Autosome	Chr_1
Chr_1	4710001	4720000	17.5002	17.3838	Autosome	Autosome	Chr_1
Chr_1	4720001	4730000	26.2087	26.5793	Autosome	Autosome	Chr_1
Chr_1	4730001	4740000	14.8121	15.1727	Autosome	Autosome	Chr_1
Chr_1	4740001	4750000	20.5185	18.1947	Autosome	Autosome	Chr_1
Chr_1	4750001	4760000	18.8261	19.226	Autosome	Autosome	Chr_1
Chr_1	4760001	4770000	16.2963	14.0141	Autosome	Autosome	Chr_1
Chr_1	4770001	4780000	22.7399	19.0437	Autosome	Autosome	Chr_1
Chr_1	4780001	4790000	20.3457	18.2733	Autosome	Autosome	Chr_1
Chr_1	4790001	4800000	20.8882	22.3954	Autosome	Autosome	Chr_1
Chr_1	4800001	4810000	22.1144	23.2069	Autosome	Autosome	Chr_1
Chr_1	4810001	4820000	24.5802	25.3656	Autosome	Autosome	Chr_1
Chr_1	4820001	4830000	20.4868	21.6056	Autosome	Autosome	Chr_1
Chr_1	4830001	4840000	15.5822	16.9346	Autosome	Autosome	Chr_1
Chr_1	4840001	4850000	18.9287	20.8782	Autosome	Autosome	Chr_1
Chr_1	4850001	4860000	13.9962	12.2404	Autosome	Autosome	Chr_1
Chr_1	4860001	4870000	20.4869	18.15	Autosome	Autosome	Chr_1
Chr_1	4870001	4880000	16.2522	15.17	Autosome	Autosome	Chr_1
Chr_1	4880001	4890000	17.7107	15.9688	Autosome	Autosome	Chr_1
Chr_1	4890001	4900000	19.676	17.949	Autosome	Autosome	Chr_1
Chr_1	4900001	4910000	20.0769	16.6438	Autosome	Autosome	Chr_1
Chr_1	4910001	4920000	23.5352	20.9198	Autosome	Autosome	Chr_1
Chr_1	4920001	4930000	20.0821	18.1932	Autosome	Autosome	Chr_1
Chr_1	4930001	4940000	20.698	18.6128	Autosome	Autosome	Chr_1
Chr_1	4940001	4950000	22.3287	19.1009	Autosome	Autosome	Chr_1
Chr_1	4950001	4960000	21.4448	21.2318	Autosome	Autosome	Chr_1
Chr_1	4960001	4970000	24.0104	26.5648	Autosome	Autosome	Chr_1
Chr_1	4970001	4980000	21.331	19.4268	Autosome	Autosome	Chr_1
Chr_1	4980001	4990000	22.2921	19.423	Autosome	Autosome	Chr_1
Chr_1	4990001	5000000	19.4662	19.1695	Autosome	Autosome	Chr_1
Chr_1	5000001	5010000	20.209	21.613	Autosome	Autosome	Chr_1
Chr_1	5010001	5020000	17.543	19.6101	Autosome	Autosome	Chr_1
Chr_1	5020001	5030000	22.0639	19.1399	Autosome	Autosome	Chr_1
Chr_1	5030001	5040000	23.1619	21.8921	Autosome	Autosome	Chr_1
Chr_1	5040001	5050000	20.7702	19.6832	Autosome	Autosome	Chr_1
Chr_1	5050001	5060000	24.1588	19.9284	Autosome	Autosome	Chr_1
Chr_1	5060001	5070000	21.2096	19.9497	Autosome	Autosome	Chr_1
Chr_1	5070001	5080000	19.2151	19.2217	Autosome	Autosome	Chr_1
Chr_1	5080001	5090000	20.2684	17.5272	Autosome	Autosome	Chr_1
Chr_1	5090001	5100000	26.6854	21.5317	Autosome	Autosome	Chr_1
Chr_1	5100001	5110000	23.9449	21.0915	Autosome	Autosome	Chr_1
Chr_1	5110001	5120000	19.0069	19.2539	Autosome	Autosome	Chr_1
Chr_1	5120001	5130000	16.7	13.5353	Autosome	Autosome	Chr_1
Chr_1	5130001	5140000	14.511	13.8571	Autosome	Autosome	Chr_1
Chr_1	5140001	5150000	18.5543	17.0701	Autosome	Autosome	Chr_1
Chr_1	5150001	5160000	19.6911	20.9375	Autosome	Autosome	Chr_1
Chr_1	5160001	5170000	13.1742	13.0416	Autosome	Autosome	Chr_1
Chr_1	5170001	5180000	11.9282	13.7801	Autosome	Autosome	Chr_1
Chr_1	5180001	5190000	12.1678	14.0247	Autosome	Autosome	Chr_1
Chr_1	5190001	5200000	12.8821	15.7514	Autosome	Autosome	Chr_1
Chr_1	5200001	5210000	24.1518	25.1279	Autosome	Autosome	Chr_1
Chr_1	5210001	5220000	12.444	12.834	Autosome	Autosome	Chr_1
Chr_1	5220001	5230000	22.9453	20.9174	Autosome	Autosome	Chr_1
Chr_1	5230001	5240000	15.3323	14.4999	Autosome	Autosome	Chr_1
Chr_1	5240001	5250000	15.735	16.3944	Autosome	Autosome	Chr_1
Chr_1	5250001	5260000	13.9147	15.3154	Autosome	Autosome	Chr_1
Chr_1	5260001	5270000	19.4633	20.9434	Autosome	Autosome	Chr_1
Chr_1	5270001	5280000	25.3698	22.7277	Autosome	Autosome	Chr_1
Chr_1	5280001	5290000	24.8216	22.3746	Autosome	Autosome	Chr_1
Chr_1	5290001	5300000	21.1164	21.2502	Autosome	Autosome	Chr_1
Chr_1	5300001	5310000	4.1848	4.4364	Autosome	Autosome	Chr_1
Chr_1	5310001	5320000	9.5517	9.1049	Autosome	Autosome	Chr_1
Chr_1	5320001	5330000	4.2162	3.339	Autosome	Autosome	Chr_1
Chr_1	5330001	5340000	14.4302	14.5697	Autosome	Autosome	Chr_1
Chr_1	5340001	5350000	9.3124	9.3201	Autosome	Autosome	Chr_1
Chr_1	5350001	5360000	3.8494	4.2592	Autosome	Autosome	Chr_1
Chr_1	5360001	5370000	10.193	10.8364	Autosome	Autosome	Chr_1
Chr_1	5370001	5380000	19.0116	20.1694	Autosome	Autosome	Chr_1
Chr_1	5380001	5390000	30.5062	30.0708	Autosome	Autosome	Chr_1
Chr_1	5390001	5400000	26.3111	27.5534	Autosome	Autosome	Chr_1
Chr_1	5400001	5410000	16.2933	18.8596	Autosome	Autosome	Chr_1
Chr_1	5410001	5420000	26.7333	27.3952	Autosome	Autosome	Chr_1
Chr_1	5420001	5430000	13.0822	11.7379	Autosome	Autosome	Chr_1
Chr_1	5430001	5440000	27.4144	30.4313	Autosome	Autosome	Chr_1
Chr_1	5440001	5450000	19.0698	23.438	Autosome	Autosome	Chr_1
Chr_1	5450001	5460000	20.0133	20.2065	Autosome	Autosome	Chr_1
Chr_1	5460001	5470000	10.7072	10.7119	Autosome	Autosome	Chr_1
Chr_1	5470001	5480000	12.905	15.1526	Autosome	Autosome	Chr_1
Chr_1	5480001	5490000	17.5689	17.0299	Autosome	Autosome	Chr_1
Chr_1	5490001	5500000	24.0488	22.6445	Autosome	Autosome	Chr_1
Chr_1	5500001	5510000	7.2736	7.8405	Autosome	Autosome	Chr_1
Chr_1	5510001	5520000	12.3771	12.5082	Autosome	Autosome	Chr_1
Chr_1	5520001	5530000	20.8388	21.2684	Autosome	Autosome	Chr_1
Chr_1	5530001	5540000	26.3847	30.356	Autosome	Autosome	Chr_1
Chr_1	5540001	5550000	12.5274	15.8977	Autosome	Autosome	Chr_1
Chr_1	5550001	5560000	23.0732	26.0173	Autosome	Autosome	Chr_1
Chr_1	5560001	5570000	21.4189	21.3611	Autosome	Autosome	Chr_1
Chr_1	5570001	5580000	24.0001	24.5457	Autosome	Autosome	Chr_1
Chr_1	5580001	5590000	12.3985	13.9717	Autosome	Autosome	Chr_1
Chr_1	5590001	5600000	16.12	16.1551	Autosome	Autosome	Chr_1
Chr_1	5600001	5610000	14.8804	18.4861	Autosome	Autosome	Chr_1
Chr_1	5610001	5620000	22.3262	23.5098	Autosome	Autosome	Chr_1
Chr_1	5620001	5630000	26.4287	23.6903	Autosome	Autosome	Chr_1
Chr_1	5630001	5640000	22.9019	22.8093	Autosome	Autosome	Chr_1
Chr_1	5640001	5650000	23.3991	20.5713	Autosome	Autosome	Chr_1
Chr_1	5650001	5660000	22.8126	22.4918	Autosome	Autosome	Chr_1
Chr_1	5660001	5670000	27.3912	26.8948	Autosome	Autosome	Chr_1
Chr_1	5670001	5680000	13.0631	15.001	Autosome	Autosome	Chr_1
Chr_1	5680001	5690000	24.786	25.9394	Autosome	Autosome	Chr_1
Chr_1	5690001	5700000	21.4582	24.8245	Autosome	Autosome	Chr_1
Chr_1	5700001	5710000	16.3128	15.1346	Autosome	Autosome	Chr_1
Chr_1	5710001	5720000	23.4831	23.6784	Autosome	Autosome	Chr_1
Chr_1	5720001	5730000	18.6778	19.4586	Autosome	Autosome	Chr_1
Chr_1	5730001	5740000	18.7589	17.2445	Autosome	Autosome	Chr_1
Chr_1	5740001	5750000	20.2055	24.7814	Autosome	Autosome	Chr_1
Chr_1	5750001	5760000	24.3822	20.7643	Autosome	Autosome	Chr_1
Chr_1	5760001	5770000	22.9305	22.2148	Autosome	Autosome	Chr_1
Chr_1	5770001	5780000	26.4141	24.4374	Autosome	Autosome	Chr_1
Chr_1	5780001	5790000	27.444	25.8663	Autosome	Autosome	Chr_1
Chr_1	5790001	5800000	20.0263	23.1015	Autosome	Autosome	Chr_1
Chr_1	5800001	5810000	19.3348	21.9864	Autosome	Autosome	Chr_1
Chr_1	5810001	5820000	15.2973	14.9909	Autosome	Autosome	Chr_1
Chr_1	5820001	5830000	21.8439	23.9974	Autosome	Autosome	Chr_1
Chr_1	5830001	5840000	18.1339	17.0821	Autosome	Autosome	Chr_1
Chr_1	5840001	5850000	19.0322	18.247	Autosome	Autosome	Chr_1
Chr_1	5850001	5860000	24.0165	21.2906	Autosome	Autosome	Chr_1
Chr_1	5860001	5870000	22.6873	21.4093	Autosome	Autosome	Chr_1
Chr_1	5870001	5880000	31.399	31.3863	Autosome	Autosome	Chr_1
Chr_1	5880001	5890000	22.8406	25.0068	Autosome	Autosome	Chr_1
Chr_1	5890001	5900000	23.3384	21.3344	Autosome	Autosome	Chr_1
Chr_1	5900001	5910000	27.957	24.986	Autosome	Autosome	Chr_1
Chr_1	5910001	5920000	14.7587	16.5429	Autosome	Autosome	Chr_1
Chr_1	5920001	5930000	22.0171	21.7251	Autosome	Autosome	Chr_1
Chr_1	5930001	5940000	19.8028	22.7089	Autosome	Autosome	Chr_1
Chr_1	5940001	5950000	25.7624	24.7265	Autosome	Autosome	Chr_1
Chr_1	5950001	5960000	18.7879	20.2142	Autosome	Autosome	Chr_1
Chr_1	5960001	5970000	15.0066	13.9488	Autosome	Autosome	Chr_1
Chr_1	5970001	5980000	21.2536	21.268	Autosome	Autosome	Chr_1
Chr_1	5980001	5990000	20.0766	19.9543	Autosome	Autosome	Chr_1
Chr_1	5990001	6000000	22.75	20.4743	Autosome	Autosome	Chr_1
Chr_1	6000001	6010000	26.6584	25.8031	Autosome	Autosome	Chr_1
Chr_1	6010001	6020000	22.2484	23.7624	Autosome	Autosome	Chr_1
Chr_1	6020001	6030000	19.4104	20.9687	Autosome	Autosome	Chr_1
Chr_1	6030001	6040000	25.4305	25.5075	Autosome	Autosome	Chr_1
Chr_1	6040001	6050000	28.6873	24.3734	Autosome	Autosome	Chr_1
Chr_1	6050001	6060000	26.4252	24.9441	Autosome	Autosome	Chr_1
Chr_1	6060001	6070000	24.444	27.3116	Autosome	Autosome	Chr_1
Chr_1	6070001	6080000	11.5115	11.1951	Autosome	Autosome	Chr_1
Chr_1	6080001	6090000	15.609	14.319	Autosome	Autosome	Chr_1
Chr_1	6090001	6100000	7.8917	9.0449	Autosome	Autosome	Chr_1
Chr_1	6100001	6110000	13.0465	14.3111	Autosome	Autosome	Chr_1
Chr_1	6110001	6120000	17.6015	18.8155	Autosome	Autosome	Chr_1
Chr_1	6120001	6130000	18.1949	21.5964	Autosome	Autosome	Chr_1
Chr_1	6130001	6140000	19.2033	16.7251	Autosome	Autosome	Chr_1
Chr_1	6140001	6150000	18.9117	17.5534	Autosome	Autosome	Chr_1
Chr_1	6150001	6160000	23.9807	19.7949	Autosome	Autosome	Chr_1
Chr_1	6160001	6170000	19.4752	16.9932	Autosome	Autosome	Chr_1
Chr_1	6170001	6180000	22.3562	19.0587	Autosome	Autosome	Chr_1
Chr_1	6180001	6190000	14.8668	16.6339	Autosome	Autosome	Chr_1
Chr_1	6190001	6200000	16.0755	15.3198	Autosome	Autosome	Chr_1
Chr_1	6200001	6210000	25.4306	23.9312	Autosome	Autosome	Chr_1
Chr_1	6210001	6220000	15.6097	14.499	Autosome	Autosome	Chr_1
Chr_1	6220001	6230000	19.801	19.3986	Autosome	Autosome	Chr_1
Chr_1	6230001	6240000	22.8456	20.1928	Autosome	Autosome	Chr_1
Chr_1	6240001	6250000	23.0218	21.8192	Autosome	Autosome	Chr_1
Chr_1	6250001	6260000	14.1476	12.9384	Autosome	Autosome	Chr_1
Chr_1	6260001	6270000	19.9389	19.7504	Autosome	Autosome	Chr_1
Chr_1	6270001	6280000	26.1081	26.3635	Autosome	Autosome	Chr_1
Chr_1	6280001	6290000	22.6414	24.7115	Autosome	Autosome	Chr_1
Chr_1	6290001	6300000	25.3197	27.2129	Autosome	Autosome	Chr_1
Chr_1	6300001	6310000	20.3178	20.4707	Autosome	Autosome	Chr_1
Chr_1	6310001	6320000	20.7813	21.4292	Autosome	Autosome	Chr_1
Chr_1	6320001	6330000	23.9875	24.1556	Autosome	Autosome	Chr_1
Chr_1	6330001	6340000	27.0642	26.788	Autosome	Autosome	Chr_1
Chr_1	6340001	6350000	25.0096	22.2752	Autosome	Autosome	Chr_1
Chr_1	6350001	6360000	21.3356	23.5504	Autosome	Autosome	Chr_1
Chr_1	6360001	6370000	24.5792	24.246	Autosome	Autosome	Chr_1
Chr_1	6370001	6380000	24.7263	25.5776	Autosome	Autosome	Chr_1
Chr_1	6380001	6390000	16.6625	19.7287	Autosome	Autosome	Chr_1
Chr_1	6390001	6400000	23.5746	19.2625	Autosome	Autosome	Chr_1
Chr_1	6400001	6410000	18.7512	16.7101	Autosome	Autosome	Chr_1
Chr_1	6410001	6420000	19.498	19.3098	Autosome	Autosome	Chr_1
Chr_1	6420001	6430000	20.0137	21.3669	Autosome	Autosome	Chr_1
Chr_1	6430001	6440000	19.829	21.5729	Autosome	Autosome	Chr_1
Chr_1	6440001	6450000	18.1042	18.2906	Autosome	Autosome	Chr_1
Chr_1	6450001	6460000	17.3777	23.1305	Autosome	Autosome	Chr_1
Chr_1	6460001	6470000	19.6552	21.464	Autosome	Autosome	Chr_1
Chr_1	6470001	6480000	16.4489	17.5607	Autosome	Autosome	Chr_1
Chr_1	6480001	6490000	22.1164	24.4001	Autosome	Autosome	Chr_1
Chr_1	6490001	6500000	23.1002	25.1576	Autosome	Autosome	Chr_1
Chr_1	6500001	6510000	21.3407	19.5239	Autosome	Autosome	Chr_1
Chr_1	6510001	6520000	13.3613	13.4317	Autosome	Autosome	Chr_1
Chr_1	6520001	6530000	21.7784	19.6829	Autosome	Autosome	Chr_1
Chr_1	6530001	6540000	18.414	18.5187	Autosome	Autosome	Chr_1
Chr_1	6540001	6550000	21.1803	22.8671	Autosome	Autosome	Chr_1
Chr_1	6550001	6560000	24.787	25.5216	Autosome	Autosome	Chr_1
Chr_1	6560001	6570000	23.338	22.7516	Autosome	Autosome	Chr_1
Chr_1	6570001	6580000	13.9799	13.6142	Autosome	Autosome	Chr_1
Chr_1	6580001	6590000	20.7493	19.3992	Autosome	Autosome	Chr_1
Chr_1	6590001	6600000	18.2175	14.6175	Autosome	Autosome	Chr_1
Chr_1	6600001	6610000	15.4256	15.0275	Autosome	Autosome	Chr_1
Chr_1	6610001	6620000	27.4264	26.6831	Autosome	Autosome	Chr_1
Chr_1	6620001	6630000	25.5003	24.9891	Autosome	Autosome	Chr_1
Chr_1	6630001	6640000	24.3011	22.6993	Autosome	Autosome	Chr_1
Chr_1	6640001	6650000	17.102	17.1279	Autosome	Autosome	Chr_1
Chr_1	6650001	6660000	24.1983	24.9657	Autosome	Autosome	Chr_1
Chr_1	6660001	6670000	25.2406	24.0924	Autosome	Autosome	Chr_1
Chr_1	6670001	6680000	25.4783	27.2111	Autosome	Autosome	Chr_1
Chr_1	6680001	6690000	28.117	27.9102	Autosome	Autosome	Chr_1
Chr_1	6690001	6700000	24.0157	19.6049	Autosome	Excluded	Chr_UP
Chr_1	6700001	6710000	27.2121	18.5666	Z	Excluded	Chr_UP
Chr_1	6710001	6720000	24.4256	19.8316	Autosome	Excluded	Chr_UP
Chr_1	6720001	6730000	21.1474	16.8358	Autosome	Autosome	Chr_1
Chr_1	6730001	6740000	14.7647	17.2123	Autosome	Autosome	Chr_1
Chr_1	6740001	6750000	29.6586	23.0673	Autosome	Autosome	Chr_1
Chr_1	6750001	6760000	21.9579	17.6664	Autosome	Autosome	Chr_1
Chr_1	6760001	6770000	20.7187	18.2827	Autosome	Autosome	Chr_1
Chr_1	6770001	6780000	28.5642	30.4941	Autosome	Autosome	Chr_1
Chr_1	6780001	6790000	17.2925	19.344	Autosome	Autosome	Chr_1
Chr_1	6790001	6800000	24.7101	23.2728	Autosome	Autosome	Chr_1
Chr_1	6800001	6810000	12.5438	12.8087	Autosome	Autosome	Chr_1
Chr_1	6810001	6820000	14.4222	13.8863	Autosome	Autosome	Chr_1
Chr_1	6820001	6830000	20.0146	18.3505	Autosome	Autosome	Chr_1
Chr_1	6830001	6840000	22.9919	18.7767	Autosome	Autosome	Chr_1
Chr_1	6840001	6850000	24.2837	22.4956	Autosome	Autosome	Chr_1
Chr_1	6850001	6860000	19.3434	20.7748	Autosome	Autosome	Chr_1
Chr_1	6860001	6870000	20.3246	20.4689	Autosome	Autosome	Chr_1
Chr_1	6870001	6880000	23.8415	24.83	Autosome	Autosome	Chr_1
Chr_1	6880001	6890000	19.11	18.3963	Autosome	Autosome	Chr_1
Chr_1	6890001	6900000	16.9394	16.6254	Autosome	Autosome	Chr_1
Chr_1	6900001	6910000	17.0154	17.6777	Autosome	Autosome	Chr_1
Chr_1	6910001	6920000	22.7595	20.3686	Autosome	Autosome	Chr_1
Chr_1	6920001	6930000	17.9996	16.9522	Autosome	Autosome	Chr_1
Chr_1	6930001	6940000	17.0809	14.827	Autosome	Autosome	Chr_1
Chr_1	6940001	6950000	16.8972	15.2869	Autosome	Autosome	Chr_1
Chr_1	6950001	6960000	27.9462	25.3991	Autosome	Autosome	Chr_1
Chr_1	6960001	6970000	24.4573	22.9973	Autosome	Autosome	Chr_1
Chr_1	6970001	6980000	25.1067	20.509	Autosome	Autosome	Chr_1
Chr_1	6980001	6990000	23.5685	19.9227	Autosome	Autosome	Chr_1
Chr_1	6990001	7000000	19.6818	17.2129	Autosome	Autosome	Chr_1
Chr_1	7000001	7010000	27.2093	24.7352	Autosome	Autosome	Chr_1
Chr_1	7010001	7020000	23.4545	23.4057	Autosome	Autosome	Chr_1
Chr_1	7020001	7030000	9.7995	12.6647	Autosome	Autosome	Chr_1
Chr_1	7030001	7040000	18.3082	15.5561	Autosome	Autosome	Chr_1
Chr_1	7040001	7050000	22.1614	23.0539	Autosome	Autosome	Chr_1
Chr_1	7050001	7060000	21.8219	18.1069	Autosome	Autosome	Chr_1
Chr_1	7060001	7070000	21.198	19.6603	Autosome	Autosome	Chr_1
Chr_1	7070001	7080000	21.4376	22.8261	Autosome	Autosome	Chr_1
Chr_1	7080001	7090000	27.2675	24.9433	Autosome	Autosome	Chr_1
Chr_1	7090001	7100000	30.3211	27.1159	Autosome	Autosome	Chr_1
Chr_1	7100001	7110000	22.1781	21.5655	Autosome	Autosome	Chr_1
Chr_1	7110001	7120000	25.4965	25.261	Autosome	Autosome	Chr_1
Chr_1	7120001	7130000	22.7101	20.0742	Autosome	Autosome	Chr_1
Chr_1	7130001	7140000	28.1078	26.3362	Autosome	Autosome	Chr_1
Chr_1	7140001	7150000	18.4594	20.193	Autosome	Autosome	Chr_1
Chr_1	7150001	7160000	13.5335	12.0639	Autosome	Autosome	Chr_1
Chr_1	7160001	7170000	19.715	19.8752	Autosome	Autosome	Chr_1
Chr_1	7170001	7180000	9.7852	10.6479	Autosome	Autosome	Chr_1
Chr_1	7180001	7190000	9.7164	9.4954	Autosome	Autosome	Chr_1
Chr_1	7190001	7200000	16.9914	17.0812	Autosome	Autosome	Chr_1
Chr_1	7200001	7210000	12.7706	14.1408	Autosome	Autosome	Chr_1
Chr_1	7210001	7220000	22.9294	25.7959	Autosome	Autosome	Chr_1
Chr_1	7220001	7230000	25.2604	24.4281	Autosome	Autosome	Chr_1
Chr_1	7230001	7240000	19.0015	19.4156	Autosome	Autosome	Chr_1
Chr_1	7240001	7250000	19.3491	19.2252	Autosome	Autosome	Chr_1
Chr_1	7250001	7260000	18.7203	19.1286	Autosome	Autosome	Chr_1
Chr_1	7260001	7270000	23.9184	21.9121	Autosome	Autosome	Chr_1
Chr_1	7270001	7280000	21.6269	21.0882	Autosome	Autosome	Chr_1
Chr_1	7280001	7290000	25.6857	25.6923	Autosome	Autosome	Chr_1
Chr_1	7290001	7300000	18.9933	18.7651	Autosome	Autosome	Chr_1
Chr_1	7300001	7310000	23.2193	22.0491	Autosome	Autosome	Chr_1
Chr_1	7310001	7320000	22.264	21.9045	Autosome	Autosome	Chr_1
Chr_1	7320001	7330000	23.2134	22.0213	Autosome	Autosome	Chr_1
Chr_1	7330001	7340000	21.9663	20.9161	Autosome	Autosome	Chr_1
Chr_1	7340001	7350000	17.5996	17.7046	Autosome	Autosome	Chr_1
Chr_1	7350001	7360000	13.6604	14.2466	Autosome	Autosome	Chr_1
Chr_1	7360001	7370000	24.1956	23.4498	Autosome	Autosome	Chr_1
Chr_1	7370001	7380000	20.2938	22.9537	Autosome	Autosome	Chr_1
Chr_1	7380001	7390000	15.2366	16.8144	Autosome	Autosome	Chr_1
Chr_1	7390001	7400000	16.7477	14.5496	Autosome	Autosome	Chr_1
Chr_1	7400001	7410000	18.2062	19.0655	Autosome	Autosome	Chr_1
Chr_1	7410001	7420000	22.393	21.0382	Autosome	Autosome	Chr_1
Chr_1	7420001	7430000	22.8895	23.8489	Autosome	Autosome	Chr_1
Chr_1	7430001	7440000	21.3166	19.9043	Autosome	Autosome	Chr_1
Chr_1	7440001	7450000	19.0414	20.3372	Autosome	Autosome	Chr_1
Chr_1	7450001	7460000	20.9184	23.9742	Autosome	Autosome	Chr_1
Chr_1	7460001	7470000	18.6771	17.772	Autosome	Autosome	Chr_1
Chr_1	7470001	7480000	17.8844	17.2176	Autosome	Autosome	Chr_1
Chr_1	7480001	7490000	24.7071	21.9188	Autosome	Autosome	Chr_1
Chr_1	7490001	7500000	18.5346	21.4205	Autosome	Autosome	Chr_1
Chr_1	7500001	7510000	22.921	21.4155	Autosome	Autosome	Chr_1
Chr_1	7510001	7520000	22.8679	22.0115	Autosome	Autosome	Chr_1
Chr_1	7520001	7530000	19.6664	21.6505	Autosome	Autosome	Chr_1
Chr_1	7530001	7540000	23.9664	23.3656	Autosome	Autosome	Chr_1
Chr_1	7540001	7550000	21.2924	21.2878	Autosome	Autosome	Chr_1
Chr_1	7550001	7560000	19.0413	19.9805	Autosome	Autosome	Chr_1
Chr_1	7560001	7570000	21.2434	19.1738	Autosome	Autosome	Chr_1
Chr_1	7570001	7580000	20.2238	20.8377	Autosome	Autosome	Chr_1
Chr_1	7580001	7590000	17.9551	16.8993	Autosome	Autosome	Chr_1
Chr_1	7590001	7600000	19.3887	17.9676	Autosome	Autosome	Chr_1
Chr_1	7600001	7610000	19.5098	22.4692	Autosome	Autosome	Chr_1
Chr_1	7610001	7620000	22.1307	20.5478	Autosome	Autosome	Chr_1
Chr_1	7620001	7630000	22.0945	21.2486	Autosome	Autosome	Chr_1
Chr_1	7630001	7640000	28.5071	24.4382	Autosome	Autosome	Chr_1
Chr_1	7640001	7650000	22.3402	20.2214	Autosome	Autosome	Chr_1
Chr_1	7650001	7660000	18.2665	19.7028	Autosome	Autosome	Chr_1
Chr_1	7660001	7670000	7.0393	6.6362	Autosome	Excluded	Chr_UP
Chr_1	7670001	7680000	0.3627	0.0326	Z	Excluded	Chr_UP
Chr_1	7680001	7690000	4.805	4.6127	Autosome	Excluded	Chr_UP
Chr_1	7690001	7700000	17.9131	18.5975	Autosome	Autosome	Chr_1
Chr_1	7700001	7710000	23.7891	33.5591	Autosome	Autosome	Chr_1
Chr_1	7710001	7720000	5.7456	11.0814	Autosome	Autosome	Chr_1
Chr_1	7720001	7730000	22.1632	26.1866	Autosome	Autosome	Chr_1
Chr_1	7730001	7740000	9.673	9.667	Autosome	Autosome	Chr_1
Chr_1	7740001	7750000	12.2905	13.5838	Autosome	Autosome	Chr_1
Chr_1	7750001	7760000	15.8172	16.5645	Autosome	Autosome	Chr_1
Chr_1	7760001	7770000	19.1124	20.3246	Autosome	Autosome	Chr_1
Chr_1	7770001	7780000	17.1955	18.1054	Autosome	Autosome	Chr_1
Chr_1	7780001	7790000	21.911	23.3571	Autosome	Autosome	Chr_1
Chr_1	7790001	7800000	21.9819	23.0512	Autosome	Autosome	Chr_1
Chr_1	7800001	7810000	21.1195	23.6073	Autosome	Autosome	Chr_1
Chr_1	7810001	7820000	17.6266	17.9322	Autosome	Autosome	Chr_1
Chr_1	7820001	7830000	18.0244	14.6448	Autosome	Autosome	Chr_1
Chr_1	7830001	7840000	15.0601	12.9191	Autosome	Autosome	Chr_1
Chr_1	7840001	7850000	8.9194	8.6117	Autosome	Autosome	Chr_1
Chr_1	7850001	7860000	10.5051	10.087	Autosome	Autosome	Chr_1
Chr_1	7860001	7870000	22.2434	24.0163	Autosome	Autosome	Chr_1
Chr_1	7870001	7880000	20.3052	16.6254	Autosome	Autosome	Chr_1
Chr_1	7880001	7890000	19.5243	16.8069	Autosome	Autosome	Chr_1
Chr_1	7890001	7900000	12.0612	12.145	Autosome	Autosome	Chr_1
Chr_1	7900001	7910000	18.0427	19.2139	Autosome	Autosome	Chr_1
Chr_1	7910001	7920000	22.0404	21.5607	Autosome	Autosome	Chr_1
Chr_1	7920001	7930000	15.8344	14.2833	Autosome	Autosome	Chr_1
Chr_1	7930001	7940000	16.8762	18.0645	Autosome	Autosome	Chr_1
Chr_1	7940001	7950000	21.751	25.3107	Autosome	Autosome	Chr_1
Chr_1	7950001	7960000	21.6561	21.9384	Autosome	Autosome	Chr_1
Chr_1	7960001	7970000	21.3376	23.1	Autosome	Autosome	Chr_1
Chr_1	7970001	7980000	21.8498	22.6987	Autosome	Autosome	Chr_1
Chr_1	7980001	7990000	15.5107	15.7001	Autosome	Autosome	Chr_1
Chr_1	7990001	8000000	24.7421	24.5684	Autosome	Autosome	Chr_1
Chr_1	8000001	8010000	24.0179	18.9004	Autosome	Autosome	Chr_1
Chr_1	8010001	8020000	19.3879	19.2551	Autosome	Autosome	Chr_1
Chr_1	8020001	8030000	17.1341	20.5837	Autosome	Autosome	Chr_1
Chr_1	8030001	8040000	20.3363	19.2991	Autosome	Autosome	Chr_1
Chr_1	8040001	8050000	22.8837	22.9203	Autosome	Autosome	Chr_1
Chr_1	8050001	8060000	23.4771	25.7441	Autosome	Autosome	Chr_1
Chr_1	8060001	8070000	21.1656	17.3857	Autosome	Autosome	Chr_1
Chr_1	8070001	8080000	21.3181	19.0264	Autosome	Autosome	Chr_1
Chr_1	8080001	8090000	24.5591	19.1512	Autosome	Autosome	Chr_1
Chr_1	8090001	8100000	18.9862	18.679	Autosome	Autosome	Chr_1
Chr_1	8100001	8110000	14.806	14.633	Autosome	Autosome	Chr_1
Chr_1	8110001	8120000	22.2072	24.9047	Autosome	Autosome	Chr_1
Chr_1	8120001	8130000	25.4791	25.9852	Autosome	Autosome	Chr_1
Chr_1	8130001	8140000	30.4147	27.688	Autosome	Autosome	Chr_1
Chr_1	8140001	8150000	30.2928	26.3387	Autosome	Autosome	Chr_1
Chr_1	8150001	8160000	24.8199	21.3607	Autosome	Autosome	Chr_1
Chr_1	8160001	8170000	22.6936	21.3462	Autosome	Autosome	Chr_1
Chr_1	8170001	8180000	18.8553	17.0404	Autosome	Autosome	Chr_1
Chr_1	8180001	8190000	28.4285	23.7331	Autosome	Autosome	Chr_1
Chr_1	8190001	8200000	28.3146	24.1301	Autosome	Autosome	Chr_1
Chr_1	8200001	8210000	23.5219	18.6592	Autosome	Autosome	Chr_1
Chr_1	8210001	8220000	27.0308	23.2282	Autosome	Autosome	Chr_1
Chr_1	8220001	8230000	18.4381	15.49	Autosome	Autosome	Chr_1
Chr_1	8230001	8240000	22.3997	20.7848	Autosome	Excluded	Chr_UP
Chr_1	8240001	8250000	24.8111	18.5701	Z	Excluded	Chr_UP
Chr_1	8250001	8260000	21.4488	18.476	Autosome	Excluded	Chr_UP
Chr_1	8260001	8270000	27.7157	23.6709	Autosome	Autosome	Chr_1
Chr_1	8270001	8280000	22.7838	21.3108	Autosome	Autosome	Chr_1
Chr_1	8280001	8290000	23.0423	19.0572	Autosome	Autosome	Chr_1
Chr_1	8290001	8300000	24.5794	24.3232	Autosome	Excluded	Chr_UP
Chr_1	8300001	8310000	21.5605	15.3097	Z	Excluded	Chr_UP
Chr_1	8310001	8320000	26.1816	26.8299	Autosome	Excluded	Chr_UP
Chr_1	8320001	8330000	23.2091	22.5056	Autosome	Autosome	Chr_1
Chr_1	8330001	8340000	24.6207	21.8049	Autosome	Autosome	Chr_1
Chr_1	8340001	8350000	23.3668	24.3573	Autosome	Autosome	Chr_1
Chr_1	8350001	8360000	23.8755	24.9666	Autosome	Autosome	Chr_1
Chr_1	8360001	8370000	20.3848	21.1294	Autosome	Autosome	Chr_1
Chr_1	8370001	8380000	12.3812	13.7143	Autosome	Autosome	Chr_1
Chr_1	8380001	8390000	22.1054	18.4086	Autosome	Autosome	Chr_1
Chr_1	8390001	8400000	23.3713	27.88	Autosome	Autosome	Chr_1
Chr_1	8400001	8410000	23.6088	22.4578	Autosome	Autosome	Chr_1
Chr_1	8410001	8420000	27.0751	24.8637	Autosome	Autosome	Chr_1
Chr_1	8420001	8430000	21.8914	23.9259	Autosome	Autosome	Chr_1
Chr_1	8430001	8440000	16.2385	16.9703	Autosome	Autosome	Chr_1
Chr_1	8440001	8450000	22.2373	21.5521	Autosome	Autosome	Chr_1
Chr_1	8450001	8460000	29.1641	29.5027	Autosome	Autosome	Chr_1
Chr_1	8460001	8470000	22.2165	21.627	Autosome	Autosome	Chr_1
Chr_1	8470001	8480000	17.4043	18.7932	Autosome	Autosome	Chr_1
Chr_1	8480001	8490000	15.6217	17.8546	Autosome	Autosome	Chr_1
Chr_1	8490001	8500000	20.8763	23.1297	Autosome	Autosome	Chr_1
Chr_1	8500001	8510000	22.3553	21.9022	Autosome	Autosome	Chr_1
Chr_1	8510001	8520000	20.3511	19.2019	Autosome	Autosome	Chr_1
Chr_1	8520001	8530000	21.2797	21.4731	Autosome	Autosome	Chr_1
Chr_1	8530001	8540000	12.1702	12.5642	Autosome	Autosome	Chr_1
Chr_1	8540001	8550000	10.0476	10.5674	Autosome	Autosome	Chr_1
Chr_1	8550001	8560000	20.4807	20.1474	Autosome	Autosome	Chr_1
Chr_1	8560001	8570000	25.9604	26.0052	Autosome	Autosome	Chr_1
Chr_1	8570001	8580000	12.3736	11.6429	Autosome	Autosome	Chr_1
Chr_1	8580001	8590000	27.0077	29.6983	Autosome	Autosome	Chr_1
Chr_1	8590001	8600000	17.4748	19.9407	Autosome	Autosome	Chr_1
Chr_1	8600001	8610000	21.3635	24.9363	Autosome	Autosome	Chr_1
Chr_1	8610001	8620000	26.0198	24.9998	Autosome	Autosome	Chr_1
Chr_1	8620001	8630000	21.6705	20.4094	Autosome	Autosome	Chr_1
Chr_1	8630001	8640000	20.9739	17.2121	Autosome	Autosome	Chr_1
Chr_1	8640001	8650000	19.5277	19.1096	Autosome	Autosome	Chr_1
Chr_1	8650001	8660000	22.9925	20.2344	Autosome	Autosome	Chr_1
Chr_1	8660001	8670000	21.0183	20.8622	Autosome	Autosome	Chr_1
Chr_1	8670001	8680000	20.0198	19.6789	Autosome	Autosome	Chr_1
Chr_1	8680001	8690000	19.3716	20.4073	Autosome	Autosome	Chr_1
Chr_1	8690001	8700000	24.6262	23.6638	Autosome	Autosome	Chr_1
Chr_1	8700001	8710000	17.7652	19.9708	Autosome	Autosome	Chr_1
Chr_1	8710001	8720000	19.7138	19.3636	Autosome	Autosome	Chr_1
Chr_1	8720001	8730000	19.1382	21.1578	Autosome	Autosome	Chr_1
Chr_1	8730001	8740000	23.4866	23.0985	Autosome	Autosome	Chr_1
Chr_1	8740001	8750000	22.2393	24.0703	Autosome	Autosome	Chr_1
Chr_1	8750001	8760000	21.1587	19.8919	Autosome	Autosome	Chr_1
Chr_1	8760001	8770000	24.8506	22.3456	Autosome	Autosome	Chr_1
Chr_1	8770001	8780000	16.5211	18.1511	Autosome	Autosome	Chr_1
Chr_1	8780001	8790000	22.2236	20.0647	Autosome	Autosome	Chr_1
Chr_1	8790001	8800000	24.7493	25.4314	Autosome	Autosome	Chr_1
Chr_1	8800001	8810000	26.91	26.9455	Autosome	Autosome	Chr_1
Chr_1	8810001	8820000	21.2473	19.697	Autosome	Autosome	Chr_1
Chr_1	8820001	8830000	23.7825	22.003	Autosome	Autosome	Chr_1
Chr_1	8830001	8840000	23.3551	23.9586	Autosome	Autosome	Chr_1
Chr_1	8840001	8850000	21.0055	20.8735	Autosome	Autosome	Chr_1
Chr_1	8850001	8860000	17.7264	18.4562	Autosome	Autosome	Chr_1
Chr_1	8860001	8870000	25.7454	28.892	Autosome	Autosome	Chr_1
Chr_1	8870001	8880000	23.0048	23.749	Autosome	Autosome	Chr_1
Chr_1	8880001	8890000	25.5402	24.896	Autosome	Autosome	Chr_1
Chr_1	8890001	8900000	20.1761	20.6144	Autosome	Autosome	Chr_1
Chr_1	8900001	8910000	22.031	24.7867	Autosome	Autosome	Chr_1
Chr_1	8910001	8920000	22.8349	22.6402	Autosome	Autosome	Chr_1
Chr_1	8920001	8930000	19.4909	20.631	Autosome	Autosome	Chr_1
Chr_1	8930001	8940000	21.1341	22.7267	Autosome	Autosome	Chr_1
Chr_1	8940001	8950000	22.6769	21.832	Autosome	Autosome	Chr_1
Chr_1	8950001	8960000	21.5194	21.7717	Autosome	Autosome	Chr_1
Chr_1	8960001	8970000	21.8812	21.6862	Autosome	Autosome	Chr_1
Chr_1	8970001	8980000	24.476	22.647	Autosome	Autosome	Chr_1
Chr_1	8980001	8990000	22.2642	22.269	Autosome	Autosome	Chr_1
Chr_1	8990001	9000000	19.5006	19.6991	Autosome	Autosome	Chr_1
Chr_1	9000001	9010000	18.7514	19.1366	Autosome	Autosome	Chr_1
Chr_1	9010001	9020000	22.418	21.3198	Autosome	Autosome	Chr_1
Chr_1	9020001	9030000	19.5801	23.1209	Autosome	Autosome	Chr_1
Chr_1	9030001	9040000	21.8141	23.3025	Autosome	Autosome	Chr_1
Chr_1	9040001	9050000	18.9981	21.0486	Autosome	Autosome	Chr_1
Chr_1	9050001	9060000	17.9136	18.4293	Autosome	Autosome	Chr_1
Chr_1	9060001	9070000	24.6319	23.0365	Autosome	Autosome	Chr_1
Chr_1	9070001	9080000	20.7021	17.8277	Autosome	Autosome	Chr_1
Chr_1	9080001	9090000	22.2556	22.283	Autosome	Autosome	Chr_1
Chr_1	9090001	9100000	23.1643	21.7789	Autosome	Autosome	Chr_1
Chr_1	9100001	9110000	25.4799	25.7671	Autosome	Autosome	Chr_1
Chr_1	9110001	9120000	14.4272	15.2129	Autosome	Autosome	Chr_1
Chr_1	9120001	9130000	12.3743	19.215	Autosome	Autosome	Chr_1
Chr_1	9130001	9140000	24.9689	27.0951	Autosome	Autosome	Chr_1
Chr_1	9140001	9150000	23.7583	21.0438	Autosome	Autosome	Chr_1
Chr_1	9150001	9160000	22.4249	21.1586	Autosome	Autosome	Chr_1
Chr_1	9160001	9170000	18.3753	20.3504	Autosome	Autosome	Chr_1
Chr_1	9170001	9180000	20.4399	21.079	Autosome	Autosome	Chr_1
Chr_1	9180001	9190000	20.1688	20.7953	Autosome	Autosome	Chr_1
Chr_1	9190001	9200000	18.5222	23.2947	Autosome	Autosome	Chr_1
Chr_1	9200001	9210000	25.4626	23.1925	Autosome	Autosome	Chr_1
Chr_1	9210001	9220000	16.5703	14.8753	Autosome	Autosome	Chr_1
Chr_1	9220001	9230000	16.7621	14.6314	Autosome	Autosome	Chr_1
Chr_1	9230001	9240000	23.3812	21.386	Autosome	Autosome	Chr_1
Chr_1	9240001	9250000	24.5601	27.0344	Autosome	Autosome	Chr_1
Chr_1	9250001	9260000	25.6025	25.3125	Autosome	Autosome	Chr_1
Chr_1	9260001	9270000	26.4504	24.2806	Autosome	Autosome	Chr_1
Chr_1	9270001	9280000	26.3973	25.0599	Autosome	Autosome	Chr_1
Chr_1	9280001	9290000	28.258	24.413	Autosome	Autosome	Chr_1
Chr_1	9290001	9300000	22.7492	21.0295	Autosome	Autosome	Chr_1
Chr_1	9300001	9310000	17.1095	16.324	Autosome	Autosome	Chr_1
Chr_1	9310001	9320000	26.6866	23.2377	Autosome	Autosome	Chr_1
Chr_1	9320001	9330000	23.4081	23.7454	Autosome	Autosome	Chr_1
Chr_1	9330001	9340000	24.2452	25.1413	Autosome	Autosome	Chr_1
Chr_1	9340001	9350000	23.7891	25.2306	Autosome	Autosome	Chr_1
Chr_1	9350001	9360000	26.1657	24.3589	Autosome	Autosome	Chr_1
Chr_1	9360001	9370000	21.8335	19.3848	Autosome	Autosome	Chr_1
Chr_1	9370001	9380000	22.9688	24.6682	Autosome	Autosome	Chr_1
Chr_1	9380001	9390000	24.6461	23.5176	Autosome	Autosome	Chr_1
Chr_1	9390001	9400000	23.0543	20.8577	Autosome	Autosome	Chr_1
Chr_1	9400001	9410000	19.5289	21.1912	Autosome	Autosome	Chr_1
Chr_1	9410001	9420000	23.6026	23.1114	Autosome	Autosome	Chr_1
Chr_1	9420001	9430000	1.519	1.2586	Autosome	Excluded	Chr_UP
Chr_1	9430001	9440000	0.0356	0.0178	Z	Excluded	Chr_UP
Chr_1	9440001	9450000	0.007	0.0163	Autosome	Excluded	Chr_UP
Chr_1	9450001	9460000	0.227	0.1123	Z	Excluded	Chr_UP
Chr_1	9460001	9470000	8.1279	7.8141	Autosome	Excluded	Chr_UP
Chr_1	9470001	9480000	20.5604	18.3374	Autosome	Autosome	Chr_1
Chr_1	9480001	9490000	14.1104	15.8969	Autosome	Autosome	Chr_1
Chr_1	9490001	9500000	19.4542	20.3239	Autosome	Autosome	Chr_1
Chr_1	9500001	9510000	23.4327	24.7497	Autosome	Autosome	Chr_1
Chr_1	9510001	9520000	24.165	26.6474	Autosome	Autosome	Chr_1
Chr_1	9520001	9530000	18.4027	17.9117	Autosome	Autosome	Chr_1
Chr_1	9530001	9540000	20.5786	22.2301	Autosome	Autosome	Chr_1
Chr_1	9540001	9550000	23.9055	23.0494	Autosome	Autosome	Chr_1
Chr_1	9550001	9560000	21.1281	18.4367	Autosome	Autosome	Chr_1
Chr_1	9560001	9570000	32.4705	29.6382	Autosome	Autosome	Chr_1
Chr_1	9570001	9580000	23.95	24.509	Autosome	Autosome	Chr_1
Chr_1	9580001	9590000	24.1513	23.7499	Autosome	Autosome	Chr_1
Chr_1	9590001	9600000	17.502	17.6291	Autosome	Autosome	Chr_1
Chr_1	9600001	9610000	14.7673	13.934	Autosome	Autosome	Chr_1
Chr_1	9610001	9620000	20.427	20.1714	Autosome	Autosome	Chr_1
Chr_1	9620001	9630000	27.9145	23.8637	Autosome	Autosome	Chr_1
Chr_1	9630001	9640000	23.9119	24.2315	Autosome	Autosome	Chr_1
Chr_1	9640001	9650000	16.1967	15.4263	Autosome	Autosome	Chr_1
Chr_1	9650001	9660000	25.3238	23.2187	Autosome	Autosome	Chr_1
Chr_1	9660001	9670000	24.0712	21.8081	Autosome	Autosome	Chr_1
Chr_1	9670001	9680000	19.6475	21.3698	Autosome	Autosome	Chr_1
Chr_1	9680001	9690000	16.9795	15.474	Autosome	Autosome	Chr_1
Chr_1	9690001	9700000	28.3127	23.5771	Autosome	Autosome	Chr_1
Chr_1	9700001	9710000	26.9141	27.0109	Autosome	Autosome	Chr_1
Chr_1	9710001	9720000	26.2223	26.5795	Autosome	Autosome	Chr_1
Chr_1	9720001	9730000	25.2468	24.0697	Autosome	Autosome	Chr_1
Chr_1	9730001	9740000	27.7722	25.8211	Autosome	Autosome	Chr_1
Chr_1	9740001	9750000	26.1394	28.7588	Autosome	Autosome	Chr_1
Chr_1	9750001	9760000	28.6859	28.3159	Autosome	Autosome	Chr_1
Chr_1	9760001	9770000	21.9624	22.7442	Autosome	Autosome	Chr_1
Chr_1	9770001	9780000	17.6918	17.4762	Autosome	Autosome	Chr_1
Chr_1	9780001	9790000	23.9876	22.1773	Autosome	Autosome	Chr_1
Chr_1	9790001	9800000	22.7402	21.8177	Autosome	Autosome	Chr_1
Chr_1	9800001	9810000	22.785	22.159	Autosome	Autosome	Chr_1
Chr_1	9810001	9820000	23.901	23.7002	Autosome	Autosome	Chr_1
Chr_1	9820001	9830000	26.6781	28.0336	Autosome	Autosome	Chr_1
Chr_1	9830001	9840000	29.3903	26.6561	Autosome	Autosome	Chr_1
Chr_1	9840001	9850000	17.8133	22.4756	Autosome	Autosome	Chr_1
Chr_1	9850001	9860000	28.0405	29.487	Autosome	Autosome	Chr_1
Chr_1	9860001	9870000	28.3967	29.7511	Autosome	Autosome	Chr_1
Chr_1	9870001	9880000	25.7273	28.3902	Autosome	Autosome	Chr_1
Chr_1	9880001	9890000	25.4471	28.3045	Autosome	Autosome	Chr_1
Chr_1	9890001	9900000	26.1144	23.1374	Autosome	Autosome	Chr_1
Chr_1	9900001	9910000	23.8782	23.4941	Autosome	Autosome	Chr_1
Chr_1	9910001	9920000	22.858	20.996	Autosome	Autosome	Chr_1
Chr_1	9920001	9930000	30.9962	30.2437	Autosome	Autosome	Chr_1
Chr_1	9930001	9940000	26.0591	23.6933	Autosome	Autosome	Chr_1
Chr_1	9940001	9950000	24.6411	25.6185	Autosome	Autosome	Chr_1
Chr_1	9950001	9960000	28.2545	23.9744	Autosome	Autosome	Chr_1
Chr_1	9960001	9970000	26.3596	25.6216	Autosome	Autosome	Chr_1
Chr_1	9970001	9980000	25.9584	22.5906	Autosome	Autosome	Chr_1
Chr_1	9980001	9990000	24.0215	23.1434	Autosome	Autosome	Chr_1
Chr_1	9990001	10000000	17.1113	16.7289	Autosome	Autosome	Chr_1
Chr_1	10000001	10010000	16.4864	18.4979	Autosome	Autosome	Chr_1
Chr_1	10010001	10020000	22.2188	22.3002	Autosome	Autosome	Chr_1
Chr_1	10020001	10030000	13.625	12.325	Autosome	Autosome	Chr_1
Chr_1	10030001	10040000	25.1365	23.029	Autosome	Autosome	Chr_1
Chr_1	10040001	10050000	23.8506	22.6202	Autosome	Autosome	Chr_1
Chr_1	10050001	10060000	21.9382	24.1861	Autosome	Autosome	Chr_1
Chr_1	10060001	10070000	16.4724	19.2172	Autosome	Autosome	Chr_1
Chr_1	10070001	10080000	21.6335	23.1832	Autosome	Autosome	Chr_1
Chr_1	10080001	10090000	6.4175	7.8305	Autosome	Autosome	Chr_1
Chr_1	10090001	10100000	0.7231	0.6992	Autosome	Autosome	Chr_1
Chr_1	10100001	10110000	14.8964	15.6599	Autosome	Autosome	Chr_1
Chr_1	10110001	10120000	9.6341	11.4446	Autosome	Autosome	Chr_1
Chr_1	10120001	10130000	19.6773	21.4234	Autosome	Autosome	Chr_1
Chr_1	10130001	10140000	20.3324	21.7514	Autosome	Autosome	Chr_1
Chr_1	10140001	10150000	19.5685	19.9187	Autosome	Autosome	Chr_1
Chr_1	10150001	10160000	26.4421	25.3925	Autosome	Autosome	Chr_1
Chr_1	10160001	10170000	21.0307	21.8164	Autosome	Autosome	Chr_1
Chr_1	10170001	10180000	25.7348	27.1074	Autosome	Autosome	Chr_1
Chr_1	10180001	10190000	17.07	19.1116	Autosome	Autosome	Chr_1
Chr_1	10190001	10200000	27.6792	27.019	Autosome	Autosome	Chr_1
Chr_1	10200001	10210000	8.7533	9.5805	Autosome	Autosome	Chr_1
Chr_1	10210001	10220000	26.3301	28.3999	Autosome	Autosome	Chr_1
Chr_1	10220001	10230000	24.9986	25.3888	Autosome	Autosome	Chr_1
Chr_1	10230001	10240000	19.5298	19.6434	Autosome	Autosome	Chr_1
Chr_1	10240001	10250000	16.0839	15.6214	Autosome	Autosome	Chr_1
Chr_1	10250001	10260000	15.7162	15.4688	Autosome	Autosome	Chr_1
Chr_1	10260001	10270000	20.8795	19.9911	Autosome	Autosome	Chr_1
Chr_1	10270001	10280000	23.8454	23.3441	Autosome	Autosome	Chr_1
Chr_1	10280001	10290000	28.8589	27.796	Autosome	Autosome	Chr_1
Chr_1	10290001	10300000	22.0376	23.7293	Autosome	Autosome	Chr_1
Chr_1	10300001	10310000	17.613	18.6372	Autosome	Autosome	Chr_1
Chr_1	10310001	10320000	21.2586	26.8729	Autosome	Autosome	Chr_1
Chr_1	10320001	10330000	2.8645	3.2452	Autosome	Autosome	Chr_1
Chr_1	10330001	10340000	13.1242	12.7077	Autosome	Autosome	Chr_1
Chr_1	10340001	10350000	23.2157	24.6383	Autosome	Autosome	Chr_1
Chr_1	10350001	10360000	5.6652	5.0578	Autosome	Autosome	Chr_1
Chr_1	10360001	10370000	18.3025	20.0373	Autosome	Autosome	Chr_1
Chr_1	10370001	10380000	25.1065	27.4975	Autosome	Autosome	Chr_1
Chr_1	10380001	10390000	24.0192	26.6877	Autosome	Autosome	Chr_1
Chr_1	10390001	10400000	24.4008	24.0736	Autosome	Autosome	Chr_1
Chr_1	10400001	10410000	11.8786	12.1683	Autosome	Autosome	Chr_1
Chr_1	10410001	10420000	25.073	26.2554	Autosome	Autosome	Chr_1
Chr_1	10420001	10430000	20.6458	19.3347	Autosome	Autosome	Chr_1
Chr_1	10430001	10440000	16.4198	21.7384	Autosome	Autosome	Chr_1
Chr_1	10440001	10450000	27.9804	29.0203	Autosome	Autosome	Chr_1
Chr_1	10450001	10460000	9.2008	9.6258	Autosome	Autosome	Chr_1
Chr_1	10460001	10470000	19.1764	18.8564	Autosome	Autosome	Chr_1
Chr_1	10470001	10480000	24.7858	22.247	Autosome	Autosome	Chr_1
Chr_1	10480001	10490000	19.0446	21.0273	Autosome	Autosome	Chr_1
Chr_1	10490001	10500000	19.325	20.3348	Autosome	Autosome	Chr_1
Chr_1	10500001	10510000	24.8922	25.8657	Autosome	Autosome	Chr_1
Chr_1	10510001	10520000	20.9226	22.4136	Autosome	Autosome	Chr_1
Chr_1	10520001	10530000	26.2534	24.6615	Autosome	Autosome	Chr_1
Chr_1	10530001	10540000	15.0811	18.0383	Autosome	Autosome	Chr_1
Chr_1	10540001	10550000	23.4157	24.2566	Autosome	Autosome	Chr_1
Chr_1	10550001	10560000	28.7404	28.3958	Autosome	Autosome	Chr_1
Chr_1	10560001	10570000	26.0126	25.5944	Autosome	Autosome	Chr_1
Chr_1	10570001	10580000	21.9226	19.3177	Autosome	Autosome	Chr_1
Chr_1	10580001	10590000	17.0319	16.3957	Autosome	Autosome	Chr_1
Chr_1	10590001	10600000	20.9149	19.8565	Autosome	Autosome	Chr_1
Chr_1	10600001	10610000	18.3613	18.329	Autosome	Autosome	Chr_1
Chr_1	10610001	10620000	23.1704	25.1515	Autosome	Autosome	Chr_1
Chr_1	10620001	10630000	23.9155	23.2357	Autosome	Autosome	Chr_1
Chr_1	10630001	10640000	25.7064	25.85	Autosome	Autosome	Chr_1
Chr_1	10640001	10650000	27.8674	25.5743	Autosome	Autosome	Chr_1
Chr_1	10650001	10660000	23.0034	22.6571	Autosome	Autosome	Chr_1
Chr_1	10660001	10670000	20.3299	23.8228	Autosome	Autosome	Chr_1
Chr_1	10670001	10680000	26.6567	27.8794	Autosome	Autosome	Chr_1
Chr_1	10680001	10690000	23.3751	21.5301	Autosome	Autosome	Chr_1
Chr_1	10690001	10700000	26.8961	27.4959	Autosome	Autosome	Chr_1
Chr_1	10700001	10710000	20.6149	22.5644	Autosome	Autosome	Chr_1
Chr_1	10710001	10720000	16.4023	19.092	Autosome	Autosome	Chr_1
Chr_1	10720001	10730000	22.4026	24.9873	Autosome	Autosome	Chr_1
Chr_1	10730001	10740000	27.4893	27.359	Autosome	Autosome	Chr_1
Chr_1	10740001	10750000	27.2063	28.3318	Autosome	Autosome	Chr_1
Chr_1	10750001	10760000	23.9689	24.5546	Autosome	Autosome	Chr_1
Chr_1	10760001	10770000	21.0477	22.2901	Autosome	Autosome	Chr_1
Chr_1	10770001	10780000	19.0577	21.9773	Autosome	Autosome	Chr_1
Chr_1	10780001	10790000	15.8598	14.8395	Autosome	Autosome	Chr_1
Chr_1	10790001	10800000	20.3497	16.6309	Autosome	Autosome	Chr_1
Chr_1	10800001	10810000	21.4776	20.2808	Autosome	Autosome	Chr_1
Chr_1	10810001	10820000	24.5981	22.0856	Autosome	Autosome	Chr_1
Chr_1	10820001	10830000	17.3626	19.3701	Autosome	Autosome	Chr_1
Chr_1	10830001	10840000	19.2131	19.6222	Autosome	Autosome	Chr_1
Chr_1	10840001	10850000	26.6567	28.8388	Autosome	Autosome	Chr_1
Chr_1	10850001	10860000	35.6013	33.6483	Autosome	Autosome	Chr_1
Chr_1	10860001	10870000	32.9234	33.087	Autosome	Autosome	Chr_1
Chr_1	10870001	10880000	42.9743	42.9516	Autosome	Autosome	Chr_1
Chr_1	10880001	10890000	25.7836	20.0146	Autosome	Autosome	Chr_1
Chr_1	10890001	10900000	23.4988	22.0323	Autosome	Autosome	Chr_1
Chr_1	10900001	10910000	23.0628	22.3027	Autosome	Autosome	Chr_1
Chr_1	10910001	10920000	21.4809	18.0388	Autosome	Autosome	Chr_1
Chr_1	10920001	10930000	24.35	23.4077	Autosome	Autosome	Chr_1
Chr_1	10930001	10940000	23.4368	18.535	Autosome	Autosome	Chr_1
Chr_1	10940001	10950000	19.2652	17.8314	Autosome	Autosome	Chr_1
Chr_1	10950001	10960000	20.9458	21.1163	Autosome	Autosome	Chr_1
Chr_1	10960001	10970000	21.4909	22.3316	Autosome	Autosome	Chr_1
Chr_1	10970001	10980000	17.488	19.4738	Autosome	Autosome	Chr_1
Chr_1	10980001	10990000	24.1022	23.1026	Autosome	Autosome	Chr_1
Chr_1	10990001	11000000	18.2649	17.1977	Autosome	Autosome	Chr_1
Chr_1	11000001	11010000	19.9363	18.3043	Autosome	Autosome	Chr_1
Chr_1	11010001	11020000	20.2404	18.2274	Autosome	Autosome	Chr_1
Chr_1	11020001	11030000	26.7497	27.9491	Autosome	Autosome	Chr_1
Chr_1	11030001	11040000	18.207	22.5363	Autosome	Autosome	Chr_1
Chr_1	11040001	11050000	25.6004	23.8804	Autosome	Autosome	Chr_1
Chr_1	11050001	11060000	22.899	24.7226	Autosome	Autosome	Chr_1
Chr_1	11060001	11070000	26.0277	25.0828	Autosome	Autosome	Chr_1
Chr_1	11070001	11080000	22.9755	21.1808	Autosome	Autosome	Chr_1
Chr_1	11080001	11090000	19.1801	19.8428	Autosome	Autosome	Chr_1
Chr_1	11090001	11100000	26.0986	23.847	Autosome	Autosome	Chr_1
Chr_1	11100001	11110000	23.9061	22.8008	Autosome	Autosome	Chr_1
Chr_1	11110001	11120000	28.0209	26.691	Autosome	Autosome	Chr_1
Chr_1	11120001	11130000	25.9094	23.4751	Autosome	Autosome	Chr_1
Chr_1	11130001	11140000	16.9666	16.4586	Autosome	Autosome	Chr_1
Chr_1	11140001	11150000	25.5007	23.3009	Autosome	Autosome	Chr_1
Chr_1	11150001	11160000	18.4134	19.0293	Autosome	Autosome	Chr_1
Chr_1	11160001	11170000	21.2371	21.0634	Autosome	Autosome	Chr_1
Chr_1	11170001	11180000	26.2701	22.6228	Autosome	Autosome	Chr_1
Chr_1	11180001	11190000	22.4504	19.9027	Autosome	Autosome	Chr_1
Chr_1	11190001	11200000	21.9204	22.2631	Autosome	Autosome	Chr_1
Chr_1	11200001	11210000	19.5761	18.7421	Autosome	Autosome	Chr_1
Chr_1	11210001	11220000	19.2366	17.1147	Autosome	Autosome	Chr_1
Chr_1	11220001	11230000	25.2795	23.6329	Autosome	Autosome	Chr_1
Chr_1	11230001	11240000	25.9877	23.1619	Autosome	Autosome	Chr_1
Chr_1	11240001	11250000	25.8902	25.476	Autosome	Autosome	Chr_1
Chr_1	11250001	11260000	25.5177	23.8317	Autosome	Autosome	Chr_1
Chr_1	11260001	11270000	25.2807	24.7107	Autosome	Autosome	Chr_1
Chr_1	11270001	11280000	21.8232	20.0929	Autosome	Autosome	Chr_1
Chr_1	11280001	11290000	20.7304	22.2867	Autosome	Autosome	Chr_1
Chr_1	11290001	11300000	25.438	22.2935	Autosome	Autosome	Chr_1
Chr_1	11300001	11310000	20.7848	19.5978	Autosome	Autosome	Chr_1
Chr_1	11310001	11320000	19.8661	21.8076	Autosome	Autosome	Chr_1
Chr_1	11320001	11330000	26.8471	26.7595	Autosome	Autosome	Chr_1
Chr_1	11330001	11340000	23.5412	23.3142	Autosome	Autosome	Chr_1
Chr_1	11340001	11350000	18.5235	17.8854	Autosome	Autosome	Chr_1
Chr_1	11350001	11360000	22.2023	21.1979	Autosome	Autosome	Chr_1
Chr_1	11360001	11370000	22.3163	19.0676	Autosome	Autosome	Chr_1
Chr_1	11370001	11380000	21.571	22.6063	Autosome	Autosome	Chr_1
Chr_1	11380001	11390000	25.2833	24.7848	Autosome	Autosome	Chr_1
Chr_1	11390001	11400000	22.3631	22.6717	Autosome	Autosome	Chr_1
Chr_1	11400001	11410000	17.0181	17.2683	Autosome	Autosome	Chr_1
Chr_1	11410001	11420000	10.1275	10.4059	Autosome	Autosome	Chr_1
Chr_1	11420001	11430000	0.1373	0.2077	Autosome	Autosome	Chr_1
Chr_1	11430001	11440000	14.706	14.7857	Autosome	Autosome	Chr_1
Chr_1	11440001	11450000	19.3417	18.8095	Autosome	Autosome	Chr_1
Chr_1	11450001	11460000	20.0884	19.5427	Autosome	Autosome	Chr_1
Chr_1	11460001	11470000	23.496	22.3665	Autosome	Autosome	Chr_1
Chr_1	11470001	11480000	19.6354	18.9276	Autosome	Autosome	Chr_1
Chr_1	11480001	11490000	15.0098	16.5312	Autosome	Autosome	Chr_1
Chr_1	11490001	11500000	24.3069	23.2032	Autosome	Autosome	Chr_1
Chr_1	11500001	11510000	20.8424	20.8839	Autosome	Autosome	Chr_1
Chr_1	11510001	11520000	11.5185	14.0791	Autosome	Autosome	Chr_1
Chr_1	11520001	11530000	17.5414	18.0803	Autosome	Autosome	Chr_1
Chr_1	11530001	11540000	27.6766	27.1605	Autosome	Autosome	Chr_1
Chr_1	11540001	11550000	34.3173	35.1984	Autosome	Autosome	Chr_1
Chr_1	11550001	11560000	22.7742	20.659	Autosome	Autosome	Chr_1
Chr_1	11560001	11570000	10.1258	9.7864	Autosome	Autosome	Chr_1
Chr_1	11570001	11580000	17.3659	16.2611	Autosome	Autosome	Chr_1
Chr_1	11580001	11590000	20.8454	21.7984	Autosome	Autosome	Chr_1
Chr_1	11590001	11600000	23.6199	26.0132	Autosome	Autosome	Chr_1
Chr_1	11600001	11610000	20.3147	20.4954	Autosome	Autosome	Chr_1
Chr_1	11610001	11620000	19.9779	20.2013	Autosome	Autosome	Chr_1
Chr_1	11620001	11630000	20.2007	21.9852	Autosome	Autosome	Chr_1
Chr_1	11630001	11640000	22.3051	23.5037	Autosome	Autosome	Chr_1
Chr_1	11640001	11650000	20.5495	16.5778	Autosome	Autosome	Chr_1
Chr_1	11650001	11660000	21.532	20.3919	Autosome	Autosome	Chr_1
Chr_1	11660001	11670000	24.2668	25.6897	Autosome	Autosome	Chr_1
Chr_1	11670001	11680000	10.9417	8.9202	Autosome	Autosome	Chr_1
Chr_1	11680001	11690000	27.1634	27.3247	Autosome	Autosome	Chr_1
Chr_1	11690001	11700000	18.6723	16.5645	Autosome	Autosome	Chr_1
Chr_1	11700001	11710000	12.7563	11.2339	Autosome	Autosome	Chr_1
Chr_1	11710001	11720000	10.7026	12.4126	Autosome	Autosome	Chr_1
Chr_1	11720001	11730000	19.8241	21.0226	Autosome	Autosome	Chr_1
Chr_1	11730001	11740000	21.9949	23.8507	Autosome	Autosome	Chr_1
Chr_1	11740001	11750000	8.8957	9.6158	Autosome	Autosome	Chr_1
Chr_1	11750001	11760000	21.2609	20.5036	Autosome	Autosome	Chr_1
Chr_1	11760001	11770000	25.212	21.7556	Autosome	Autosome	Chr_1
Chr_1	11770001	11780000	22.3256	20.858	Autosome	Autosome	Chr_1
Chr_1	11780001	11790000	38.8121	38.418	Autosome	Autosome	Chr_1
Chr_1	11790001	11800000	35.0266	36.8453	Autosome	Autosome	Chr_1
Chr_1	11800001	11810000	24.8023	21.4302	Autosome	Autosome	Chr_1
Chr_1	11810001	11820000	18.9781	20.5266	Autosome	Autosome	Chr_1
Chr_1	11820001	11830000	27.2298	25.7706	Autosome	Autosome	Chr_1
Chr_1	11830001	11840000	26.1999	26.7449	Autosome	Autosome	Chr_1
Chr_1	11840001	11850000	22.5185	24.5162	Autosome	Autosome	Chr_1
Chr_1	11850001	11860000	28.8987	25.6162	Autosome	Autosome	Chr_1
Chr_1	11860001	11870000	25.2308	21.3166	Autosome	Autosome	Chr_1
Chr_1	11870001	11880000	24.4572	22.4928	Autosome	Autosome	Chr_1
Chr_1	11880001	11890000	24.8562	26.3361	Autosome	Autosome	Chr_1
Chr_1	11890001	11900000	32.2188	29.2223	Autosome	Autosome	Chr_1
Chr_1	11900001	11910000	28.5663	30.184	Autosome	Autosome	Chr_1
Chr_1	11910001	11920000	10.3398	10.6754	Autosome	Autosome	Chr_1
Chr_1	11920001	11930000	23.8691	21.6632	Autosome	Autosome	Chr_1
Chr_1	11930001	11940000	20.6275	21.7822	Autosome	Autosome	Chr_1
Chr_1	11940001	11950000	12.5766	14.0171	Autosome	Autosome	Chr_1
Chr_1	11950001	11960000	27.8794	29.3008	Autosome	Autosome	Chr_1
Chr_1	11960001	11970000	15.8796	14.5984	Autosome	Autosome	Chr_1
Chr_1	11970001	11980000	26.7761	29.0025	Autosome	Autosome	Chr_1
Chr_1	11980001	11990000	15.6004	15.63	Autosome	Autosome	Chr_1
Chr_1	11990001	12000000	2.759	2.7249	Autosome	Autosome	Chr_1
Chr_1	12000001	12010000	0.0667	0.054	Autosome	Autosome	Chr_1
Chr_1	12010001	12020000	0.0518	0.0428	Autosome	Autosome	Chr_1
Chr_1	12020001	12030000	0.0185	0.048	Autosome	Autosome	Chr_1
Chr_1	12030001	12040000	12.5154	10.5724	Autosome	Autosome	Chr_1
Chr_1	12040001	12050000	23.6791	23.5189	Autosome	Autosome	Chr_1
Chr_1	12050001	12060000	19.1384	18.2493	Autosome	Autosome	Chr_1
Chr_1	12060001	12070000	17.9195	17.3743	Autosome	Autosome	Chr_1
Chr_1	12070001	12080000	23.5535	21.8122	Autosome	Autosome	Chr_1
Chr_1	12080001	12090000	25.4823	20.6405	Autosome	Autosome	Chr_1
Chr_1	12090001	12100000	9.2885	10.1996	Autosome	Autosome	Chr_1
Chr_1	12100001	12110000	15.5491	15.7391	Autosome	Autosome	Chr_1
Chr_1	12110001	12120000	19.9459	20.1862	Autosome	Autosome	Chr_1
Chr_1	12120001	12130000	19.9757	17.9905	Autosome	Autosome	Chr_1
Chr_1	12130001	12140000	19.6002	19.4817	Autosome	Autosome	Chr_1
Chr_1	12140001	12150000	23.3035	23.0421	Autosome	Autosome	Chr_1
Chr_1	12150001	12160000	24.9932	28.3837	Autosome	Autosome	Chr_1
Chr_1	12160001	12170000	20.1686	19.6856	Autosome	Autosome	Chr_1
Chr_1	12170001	12180000	25.0003	25.9407	Autosome	Autosome	Chr_1
Chr_1	12180001	12190000	25.889	27.1114	Autosome	Autosome	Chr_1
Chr_1	12190001	12200000	28.8014	25.6094	Autosome	Autosome	Chr_1
Chr_1	12200001	12210000	26.4898	27.7869	Autosome	Autosome	Chr_1
Chr_1	12210001	12220000	24.9697	24.3172	Autosome	Autosome	Chr_1
Chr_1	12220001	12230000	18.7928	20.0547	Autosome	Autosome	Chr_1
Chr_1	12230001	12240000	24.8153	22.3507	Autosome	Autosome	Chr_1
Chr_1	12240001	12250000	14.4166	16.2415	Autosome	Autosome	Chr_1
Chr_1	12250001	12260000	23.1541	21.4686	Autosome	Autosome	Chr_1
Chr_1	12260001	12270000	22.3496	21.257	Autosome	Autosome	Chr_1
Chr_1	12270001	12280000	17.5117	17.0295	Autosome	Autosome	Chr_1
Chr_1	12280001	12290000	8.835	9.2037	Autosome	Autosome	Chr_1
Chr_1	12290001	12300000	0.0489	0.1411	Autosome	Autosome	Chr_1
Chr_1	12300001	12310000	0.101	0.205	Autosome	Autosome	Chr_1
Chr_1	12310001	12320000	8.1062	9.4572	Autosome	Autosome	Chr_1
Chr_1	12320001	12330000	20.7237	20.4501	Autosome	Autosome	Chr_1
Chr_1	12330001	12340000	23.2487	25.0408	Autosome	Autosome	Chr_1
Chr_1	12340001	12350000	23.7522	22.8255	Autosome	Autosome	Chr_1
Chr_1	12350001	12360000	21.9095	23.3008	Autosome	Autosome	Chr_1
Chr_1	12360001	12370000	22.4409	21.0727	Autosome	Autosome	Chr_1
Chr_1	12370001	12380000	23.2586	22.0948	Autosome	Autosome	Chr_1
Chr_1	12380001	12390000	18.1866	17.3841	Autosome	Autosome	Chr_1
Chr_1	12390001	12400000	20.341	20.4562	Autosome	Autosome	Chr_1
Chr_1	12400001	12410000	16.9479	16.4518	Autosome	Autosome	Chr_1
Chr_1	12410001	12420000	18.7897	18.3232	Autosome	Autosome	Chr_1
Chr_1	12420001	12430000	23.0875	24.0216	Autosome	Autosome	Chr_1
Chr_1	12430001	12440000	25.1497	24.6952	Autosome	Autosome	Chr_1
Chr_1	12440001	12450000	14.1209	15.1706	Autosome	Autosome	Chr_1
Chr_1	12450001	12460000	26.2157	25.0993	Autosome	Autosome	Chr_1
Chr_1	12460001	12470000	21.7602	23.4517	Autosome	Autosome	Chr_1
Chr_1	12470001	12480000	25.8139	22.4973	Autosome	Autosome	Chr_1
Chr_1	12480001	12490000	26.0484	24.5812	Autosome	Autosome	Chr_1
Chr_1	12490001	12500000	18.9794	20.9035	Autosome	Autosome	Chr_1
Chr_1	12500001	12510000	26.4004	22.8814	Autosome	Autosome	Chr_1
Chr_1	12510001	12520000	22.3315	21.841	Autosome	Autosome	Chr_1
Chr_1	12520001	12530000	19.4009	19.4217	Autosome	Autosome	Chr_1
Chr_1	12530001	12540000	20.7325	20.4643	Autosome	Autosome	Chr_1
Chr_1	12540001	12550000	22.2565	22.1994	Autosome	Autosome	Chr_1
Chr_1	12550001	12560000	21.6155	21.3671	Autosome	Autosome	Chr_1
Chr_1	12560001	12570000	19.1718	19.7282	Autosome	Autosome	Chr_1
Chr_1	12570001	12580000	20.0147	15.5758	Autosome	Autosome	Chr_1
Chr_1	12580001	12590000	21.2084	19.5632	Autosome	Autosome	Chr_1
Chr_1	12590001	12600000	21.0698	19.3707	Autosome	Autosome	Chr_1
Chr_1	12600001	12610000	22.9687	23.7796	Autosome	Autosome	Chr_1
Chr_1	12610001	12620000	26.2872	29.4869	Autosome	Autosome	Chr_1
Chr_1	12620001	12630000	24.5265	22.3265	Autosome	Autosome	Chr_1
Chr_1	12630001	12640000	25.998	24.6676	Autosome	Autosome	Chr_1
Chr_1	12640001	12650000	23.3785	23.7913	Autosome	Autosome	Chr_1
Chr_1	12650001	12660000	21.0752	23.6558	Autosome	Autosome	Chr_1
Chr_1	12660001	12670000	21.6332	19.1405	Autosome	Autosome	Chr_1
Chr_1	12670001	12680000	23.1968	21.2304	Autosome	Autosome	Chr_1
Chr_1	12680001	12690000	20.2749	18.8933	Autosome	Autosome	Chr_1
Chr_1	12690001	12700000	21.9955	21.3154	Autosome	Autosome	Chr_1
Chr_1	12700001	12710000	27.2589	29.5296	Autosome	Autosome	Chr_1
Chr_1	12710001	12720000	25.7643	27.6353	Autosome	Autosome	Chr_1
Chr_1	12720001	12730000	31.3617	29.0999	Autosome	Autosome	Chr_1
Chr_1	12730001	12740000	19.5652	15.8431	Autosome	Autosome	Chr_1
Chr_1	12740001	12750000	17.5635	19.4239	Autosome	Autosome	Chr_1
Chr_1	12750001	12760000	19.4148	20.7318	Autosome	Autosome	Chr_1
Chr_1	12760001	12770000	19.7745	20.007	Autosome	Autosome	Chr_1
Chr_1	12770001	12780000	10.4513	11.4988	Autosome	Autosome	Chr_1
Chr_1	12780001	12790000	17.4101	17.9066	Autosome	Autosome	Chr_1
Chr_1	12790001	12800000	25.928	26.6804	Autosome	Autosome	Chr_1
Chr_1	12800001	12810000	1.8558	2.2208	Autosome	Autosome	Chr_1
Chr_1	12810001	12820000	25.2267	25.4919	Autosome	Autosome	Chr_1
Chr_1	12820001	12830000	24.52	24.0672	Autosome	Autosome	Chr_1
Chr_1	12830001	12840000	24.2751	23.7765	Autosome	Autosome	Chr_1
Chr_1	12840001	12850000	23.3457	23.4988	Autosome	Autosome	Chr_1
Chr_1	12850001	12860000	20.1294	21.4653	Autosome	Autosome	Chr_1
Chr_1	12860001	12870000	21.4178	19.4576	Autosome	Autosome	Chr_1
Chr_1	12870001	12880000	19.5878	17.4316	Autosome	Autosome	Chr_1
Chr_1	12880001	12890000	17.9392	16.1715	Autosome	Autosome	Chr_1
Chr_1	12890001	12900000	19.991	20.616	Autosome	Autosome	Chr_1
Chr_1	12900001	12910000	22.962	22.621	Autosome	Autosome	Chr_1
Chr_1	12910001	12920000	19.5921	21.3623	Autosome	Autosome	Chr_1
Chr_1	12920001	12930000	22.4058	24.2962	Autosome	Autosome	Chr_1
Chr_1	12930001	12940000	27.61	28.2925	Autosome	Autosome	Chr_1
Chr_1	12940001	12950000	23.8132	24.956	Autosome	Autosome	Chr_1
Chr_1	12950001	12960000	22.6388	19.8917	Autosome	Autosome	Chr_1
Chr_1	12960001	12970000	26.8056	24.9556	Autosome	Autosome	Chr_1
Chr_1	12970001	12980000	25.713	24.9078	Autosome	Autosome	Chr_1
Chr_1	12980001	12990000	22.7633	22.8452	Autosome	Autosome	Chr_1
Chr_1	12990001	13000000	20.833	20.5695	Autosome	Autosome	Chr_1
Chr_1	13000001	13010000	20.9004	19.8132	Autosome	Autosome	Chr_1
Chr_1	13010001	13020000	25.2953	23.672	Autosome	Autosome	Chr_1
Chr_1	13020001	13030000	22.6051	18.0565	Autosome	Autosome	Chr_1
Chr_1	13030001	13040000	11.584	11.3464	Autosome	Autosome	Chr_1
Chr_1	13040001	13050000	23.8142	25.9805	Autosome	Autosome	Chr_1
Chr_1	13050001	13060000	23.7701	20.9526	Autosome	Autosome	Chr_1
Chr_1	13060001	13070000	21.2201	21.5846	Autosome	Autosome	Chr_1
Chr_1	13070001	13080000	20.2921	17.9168	Autosome	Autosome	Chr_1
Chr_1	13080001	13090000	19.8288	17.2481	Autosome	Autosome	Chr_1
Chr_1	13090001	13100000	21.2651	21.8539	Autosome	Autosome	Chr_1
Chr_1	13100001	13110000	20.5875	16.5039	Autosome	Autosome	Chr_1
Chr_1	13110001	13120000	23.2347	23.4415	Autosome	Autosome	Chr_1
Chr_1	13120001	13130000	21.2568	22.4806	Autosome	Autosome	Chr_1
Chr_1	13130001	13140000	19.5645	17.5109	Autosome	Autosome	Chr_1
Chr_1	13140001	13150000	14.4174	16.1181	Autosome	Autosome	Chr_1
Chr_1	13150001	13160000	24.2064	24.4364	Autosome	Autosome	Chr_1
Chr_1	13160001	13170000	22.1009	22.7678	Autosome	Autosome	Chr_1
Chr_1	13170001	13180000	23.7721	24.1096	Autosome	Autosome	Chr_1
Chr_1	13180001	13190000	25.9	25.7205	Autosome	Autosome	Chr_1
Chr_1	13190001	13200000	20.1849	20.6094	Autosome	Autosome	Chr_1
Chr_1	13200001	13210000	24.0994	21.0993	Autosome	Autosome	Chr_1
Chr_1	13210001	13220000	19.2188	19.9993	Autosome	Autosome	Chr_1
Chr_1	13220001	13230000	19.9391	18.5964	Autosome	Autosome	Chr_1
Chr_1	13230001	13240000	17.9414	19.6609	Autosome	Autosome	Chr_1
Chr_1	13240001	13250000	20.7543	21.7219	Autosome	Autosome	Chr_1
Chr_1	13250001	13260000	21.6378	22.9207	Autosome	Autosome	Chr_1
Chr_1	13260001	13270000	17.5283	18.511	Autosome	Autosome	Chr_1
Chr_1	13270001	13280000	19.5943	18.5131	Autosome	Autosome	Chr_1
Chr_1	13280001	13290000	21.716	24.6731	Autosome	Autosome	Chr_1
Chr_1	13290001	13300000	23.1303	23.033	Autosome	Autosome	Chr_1
Chr_1	13300001	13310000	24.627	21.2298	Autosome	Autosome	Chr_1
Chr_1	13310001	13320000	14.7919	15.3501	Autosome	Autosome	Chr_1
Chr_1	13320001	13330000	15.0705	15.2313	Autosome	Autosome	Chr_1
Chr_1	13330001	13340000	23.2949	21.3468	Autosome	Autosome	Chr_1
Chr_1	13340001	13350000	18.5853	17.2607	Autosome	Autosome	Chr_1
Chr_1	13350001	13360000	20.0613	18.1191	Autosome	Autosome	Chr_1
Chr_1	13360001	13370000	19.9052	18.5453	Autosome	Autosome	Chr_1
Chr_1	13370001	13380000	21.4896	19.5957	Autosome	Autosome	Chr_1
Chr_1	13380001	13390000	22.0428	21.7294	Autosome	Autosome	Chr_1
Chr_1	13390001	13400000	18.6321	21.0171	Autosome	Autosome	Chr_1
Chr_1	13400001	13410000	23.2155	24.8889	Autosome	Autosome	Chr_1
Chr_1	13410001	13420000	14.9514	14.5737	Autosome	Autosome	Chr_1
Chr_1	13420001	13430000	27.2873	24.081	Autosome	Autosome	Chr_1
Chr_1	13430001	13440000	18.3585	15.8428	Autosome	Autosome	Chr_1
Chr_1	13440001	13450000	20.7554	19.5311	Autosome	Autosome	Chr_1
Chr_1	13450001	13460000	26.4417	22.7927	Autosome	Autosome	Chr_1
Chr_1	13460001	13470000	22.692	23.3146	Autosome	Autosome	Chr_1
Chr_1	13470001	13480000	23.8092	24.0612	Autosome	Autosome	Chr_1
Chr_1	13480001	13490000	23.2159	21.9959	Autosome	Autosome	Chr_1
Chr_1	13490001	13500000	28.5266	29.2206	Autosome	Autosome	Chr_1
Chr_1	13500001	13510000	27.4849	31.0211	Autosome	Autosome	Chr_1
Chr_1	13510001	13520000	24.5328	21.8887	Autosome	Autosome	Chr_1
Chr_1	13520001	13530000	24.6377	24.4148	Autosome	Autosome	Chr_1
Chr_1	13530001	13540000	26.654	25.5036	Autosome	Autosome	Chr_1
Chr_1	13540001	13550000	26.7688	23.0299	Autosome	Autosome	Chr_1
Chr_1	13550001	13560000	18.2019	19.8063	Autosome	Autosome	Chr_1
Chr_1	13560001	13570000	13.5207	13.5973	Autosome	Autosome	Chr_1
Chr_1	13570001	13580000	25.6169	23.5793	Autosome	Autosome	Chr_1
Chr_1	13580001	13590000	25.312	25.1085	Autosome	Autosome	Chr_1
Chr_1	13590001	13600000	15.5697	14.5472	Autosome	Autosome	Chr_1
Chr_1	13600001	13610000	27.9204	26.0092	Autosome	Autosome	Chr_1
Chr_1	13610001	13620000	26.1301	26.8256	Autosome	Autosome	Chr_1
Chr_1	13620001	13630000	23.1917	31.6074	Autosome	Autosome	Chr_1
Chr_1	13630001	13640000	23.0363	26.1034	Autosome	Autosome	Chr_1
Chr_1	13640001	13650000	22.0194	21.8637	Autosome	Autosome	Chr_1
Chr_1	13650001	13660000	14.8145	15.1581	Autosome	Autosome	Chr_1
Chr_1	13660001	13670000	19.2084	16.0362	Autosome	Autosome	Chr_1
Chr_1	13670001	13680000	21.6685	19.7773	Autosome	Autosome	Chr_1
Chr_1	13680001	13690000	26.6586	24.6851	Autosome	Autosome	Chr_1
Chr_1	13690001	13700000	19.8657	21.2596	Autosome	Autosome	Chr_1
Chr_1	13700001	13710000	18.767	18.9717	Autosome	Autosome	Chr_1
Chr_1	13710001	13720000	23.0975	21.2909	Autosome	Autosome	Chr_1
Chr_1	13720001	13730000	22.4425	22.5994	Autosome	Autosome	Chr_1
Chr_1	13730001	13740000	21.0044	22.0799	Autosome	Autosome	Chr_1
Chr_1	13740001	13750000	14.29	15.7562	Autosome	Autosome	Chr_1
Chr_1	13750001	13760000	20.8465	18.0163	Autosome	Autosome	Chr_1
Chr_1	13760001	13770000	19.8892	18.2733	Autosome	Autosome	Chr_1
Chr_1	13770001	13780000	20.3598	21.6605	Autosome	Autosome	Chr_1
Chr_1	13780001	13790000	25.1415	20.7431	Autosome	Autosome	Chr_1
Chr_1	13790001	13800000	25.7308	25.7996	Autosome	Autosome	Chr_1
Chr_1	13800001	13810000	27.7277	28.6299	Autosome	Autosome	Chr_1
Chr_1	13810001	13820000	22.6055	26.9313	Autosome	Autosome	Chr_1
Chr_1	13820001	13830000	27.5926	25.2838	Autosome	Autosome	Chr_1
Chr_1	13830001	13840000	14.2502	13.673	Autosome	Autosome	Chr_1
Chr_1	13840001	13850000	20.005	22.7774	Autosome	Autosome	Chr_1
Chr_1	13850001	13860000	29.2536	28.7277	Autosome	Autosome	Chr_1
Chr_1	13860001	13870000	22.9742	22.9306	Autosome	Autosome	Chr_1
Chr_1	13870001	13880000	23.3333	26.405	Autosome	Autosome	Chr_1
Chr_1	13880001	13890000	20.3248	22.3994	Autosome	Autosome	Chr_1
Chr_1	13890001	13900000	9.8292	8.9762	Autosome	Autosome	Chr_1
Chr_1	13900001	13910000	14.8577	16.5752	Autosome	Autosome	Chr_1
Chr_1	13910001	13920000	25.8733	21.698	Autosome	Autosome	Chr_1
Chr_1	13920001	13930000	20.3359	20.4044	Autosome	Autosome	Chr_1
Chr_1	13930001	13940000	18.4805	19.3811	Autosome	Autosome	Chr_1
Chr_1	13940001	13950000	21.8786	22.1628	Autosome	Autosome	Chr_1
Chr_1	13950001	13960000	19.9345	20.3836	Autosome	Autosome	Chr_1
Chr_1	13960001	13970000	19.1345	21.0397	Autosome	Autosome	Chr_1
Chr_1	13970001	13980000	24.9152	24.2401	Autosome	Autosome	Chr_1
Chr_1	13980001	13990000	23.4126	24.9153	Autosome	Autosome	Chr_1
Chr_1	13990001	14000000	24.7424	26.313	Autosome	Autosome	Chr_1
Chr_1	14000001	14010000	22.0609	24.0472	Autosome	Autosome	Chr_1
Chr_1	14010001	14020000	24.7858	24.518	Autosome	Autosome	Chr_1
Chr_1	14020001	14030000	13.1317	16.2011	Autosome	Autosome	Chr_1
Chr_1	14030001	14040000	7.5753	9.1955	Autosome	Autosome	Chr_1
Chr_1	14040001	14050000	7.4247	8.0086	Autosome	Autosome	Chr_1
Chr_1	14050001	14060000	23.909	21.9703	Autosome	Autosome	Chr_1
Chr_1	14060001	14070000	23.4445	21.7466	Autosome	Autosome	Chr_1
Chr_1	14070001	14080000	18.512	20.2299	Autosome	Autosome	Chr_1
Chr_1	14080001	14090000	15.576	15.6172	Autosome	Autosome	Chr_1
Chr_1	14090001	14100000	19.3726	21.0594	Autosome	Autosome	Chr_1
Chr_1	14100001	14110000	18.5777	19.7452	Autosome	Autosome	Chr_1
Chr_1	14110001	14120000	19.3082	19.2028	Autosome	Autosome	Chr_1
Chr_1	14120001	14130000	10.821	10.3477	Autosome	Autosome	Chr_1
Chr_1	14130001	14140000	17.045	13.6322	Autosome	Autosome	Chr_1
Chr_1	14140001	14150000	21.2522	22.9212	Autosome	Autosome	Chr_1
Chr_1	14150001	14160000	21.2143	23.8044	Autosome	Autosome	Chr_1
Chr_1	14160001	14170000	13.3054	15.0399	Autosome	Autosome	Chr_1
Chr_1	14170001	14180000	23.6664	25.0076	Autosome	Autosome	Chr_1
Chr_1	14180001	14190000	22.4015	22.1762	Autosome	Autosome	Chr_1
Chr_1	14190001	14200000	21.286	24.3167	Autosome	Autosome	Chr_1
Chr_1	14200001	14210000	18.4801	17.372	Autosome	Autosome	Chr_1
Chr_1	14210001	14220000	17.0289	15.2125	Autosome	Autosome	Chr_1
Chr_1	14220001	14230000	23.7184	30.684	Autosome	Autosome	Chr_1
Chr_1	14230001	14240000	29.989	33.0562	Autosome	Autosome	Chr_1
Chr_1	14240001	14250000	29.4985	31.256	Autosome	Autosome	Chr_1
Chr_1	14250001	14260000	23.2083	24.9338	Autosome	Autosome	Chr_1
Chr_1	14260001	14270000	19.2568	18.1538	Autosome	Autosome	Chr_1
Chr_1	14270001	14280000	18.4453	17.3236	Autosome	Autosome	Chr_1
Chr_1	14280001	14290000	20.9697	21.9003	Autosome	Autosome	Chr_1
Chr_1	14290001	14300000	27.774	27.8231	Autosome	Autosome	Chr_1
Chr_1	14300001	14310000	25.065	21.4756	Autosome	Autosome	Chr_1
Chr_1	14310001	14320000	27.8239	26.0631	Autosome	Autosome	Chr_1
Chr_1	14320001	14330000	27.3025	25.0399	Autosome	Autosome	Chr_1
Chr_1	14330001	14340000	22.4513	25.6634	Autosome	Autosome	Chr_1
Chr_1	14340001	14350000	17.4003	17.8519	Autosome	Autosome	Chr_1
Chr_1	14350001	14360000	27.8587	26.9456	Autosome	Autosome	Chr_1
Chr_1	14360001	14370000	25.6283	24.1595	Autosome	Autosome	Chr_1
Chr_1	14370001	14380000	23.8202	21.1818	Autosome	Autosome	Chr_1
Chr_1	14380001	14390000	18.9792	19.9628	Autosome	Autosome	Chr_1
Chr_1	14390001	14400000	19.1819	18.0511	Autosome	Autosome	Chr_1
Chr_1	14400001	14410000	26.6163	24.8839	Autosome	Autosome	Chr_1
Chr_1	14410001	14420000	23.9845	26.4906	Autosome	Autosome	Chr_1
Chr_1	14420001	14430000	24.7145	25.0262	Autosome	Autosome	Chr_1
Chr_1	14430001	14440000	25.3864	26.1829	Autosome	Autosome	Chr_1
Chr_1	14440001	14450000	22.7599	22.4175	Autosome	Autosome	Chr_1
Chr_1	14450001	14460000	18.2873	19.2386	Autosome	Autosome	Chr_1
Chr_1	14460001	14470000	24.3226	26.3766	Autosome	Autosome	Chr_1
Chr_1	14470001	14480000	22.8878	28.4261	Autosome	Autosome	Chr_1
Chr_1	14480001	14490000	19.3113	18.7238	Autosome	Autosome	Chr_1
Chr_1	14490001	14500000	26.5461	26.5822	Autosome	Autosome	Chr_1
Chr_1	14500001	14510000	29.345	28.9558	Autosome	Autosome	Chr_1
Chr_1	14510001	14520000	26.3771	23.3171	Autosome	Autosome	Chr_1
Chr_1	14520001	14530000	22.6146	21.6459	Autosome	Autosome	Chr_1
Chr_1	14530001	14540000	20.4965	18.1261	Autosome	Autosome	Chr_1
Chr_1	14540001	14550000	15.511	14.4881	Autosome	Autosome	Chr_1
Chr_1	14550001	14560000	19.3757	17.6609	Autosome	Autosome	Chr_1
Chr_1	14560001	14570000	24.1235	24.3793	Autosome	Autosome	Chr_1
Chr_1	14570001	14580000	24.8636	23.438	Autosome	Autosome	Chr_1
Chr_1	14580001	14590000	26.5639	23.9123	Autosome	Autosome	Chr_1
Chr_1	14590001	14600000	22.0812	24.8639	Autosome	Autosome	Chr_1
Chr_1	14600001	14610000	19.6259	19.8766	Autosome	Autosome	Chr_1
Chr_1	14610001	14620000	29.1139	22.8028	Autosome	Autosome	Chr_1
Chr_1	14620001	14630000	28.2209	25.5737	Autosome	Autosome	Chr_1
Chr_1	14630001	14640000	26.3916	30.1872	Autosome	Autosome	Chr_1
Chr_1	14640001	14650000	24.4853	23.4639	Autosome	Autosome	Chr_1
Chr_1	14650001	14660000	22.7216	22.907	Autosome	Autosome	Chr_1
Chr_1	14660001	14670000	17.7487	19.5551	Autosome	Autosome	Chr_1
Chr_1	14670001	14680000	12.5761	15.3755	Autosome	Autosome	Chr_1
Chr_1	14680001	14690000	20.1966	20.2533	Autosome	Autosome	Chr_1
Chr_1	14690001	14700000	23.5272	22.5587	Autosome	Autosome	Chr_1
Chr_1	14700001	14710000	22.2767	22.5284	Autosome	Autosome	Chr_1
Chr_1	14710001	14720000	21.8035	20.8281	Autosome	Autosome	Chr_1
Chr_1	14720001	14730000	22.3766	22.6639	Autosome	Autosome	Chr_1
Chr_1	14730001	14740000	13.1424	14.7903	Autosome	Autosome	Chr_1
Chr_1	14740001	14750000	24.3754	26.1346	Autosome	Autosome	Chr_1
Chr_1	14750001	14760000	26.7784	25.5295	Autosome	Autosome	Chr_1
Chr_1	14760001	14770000	24.022	22.7981	Autosome	Autosome	Chr_1
Chr_1	14770001	14780000	22.1368	23.8249	Autosome	Autosome	Chr_1
Chr_1	14780001	14790000	22.7075	22.1209	Autosome	Autosome	Chr_1
Chr_1	14790001	14800000	19.1189	17.8537	Autosome	Autosome	Chr_1
Chr_1	14800001	14810000	23.7521	22.1115	Autosome	Autosome	Chr_1
Chr_1	14810001	14820000	22.3683	23.6383	Autosome	Autosome	Chr_1
Chr_1	14820001	14830000	23.9278	28.333	Autosome	Autosome	Chr_1
Chr_1	14830001	14840000	10.2215	11.6198	Autosome	Autosome	Chr_1
Chr_1	14840001	14850000	21.3779	21.3952	Autosome	Autosome	Chr_1
Chr_1	14850001	14860000	11.147	11.7392	Autosome	Autosome	Chr_1
Chr_1	14860001	14870000	18.7694	16.9399	Autosome	Autosome	Chr_1
Chr_1	14870001	14880000	26.6644	24.7418	Autosome	Autosome	Chr_1
Chr_1	14880001	14890000	21.6932	23.205	Autosome	Autosome	Chr_1
Chr_1	14890001	14900000	20.563	20.0872	Autosome	Autosome	Chr_1
Chr_1	14900001	14910000	10.3291	12.9222	Autosome	Autosome	Chr_1
Chr_1	14910001	14920000	10.2012	10.903	Autosome	Autosome	Chr_1
Chr_1	14920001	14930000	13.4824	14.3844	Autosome	Autosome	Chr_1
Chr_1	14930001	14940000	24.6483	22.9817	Autosome	Autosome	Chr_1
Chr_1	14940001	14950000	11.8233	14.3943	Autosome	Autosome	Chr_1
Chr_1	14950001	14960000	24.9293	24.1435	Autosome	Autosome	Chr_1
Chr_1	14960001	14970000	24.3865	26.636	Autosome	Autosome	Chr_1
Chr_1	14970001	14980000	19.8238	23.8918	Autosome	Autosome	Chr_1
Chr_1	14980001	14990000	20.5691	24.5385	Autosome	Autosome	Chr_1
Chr_1	14990001	15000000	20.8534	18.6646	Autosome	Autosome	Chr_1
Chr_1	15000001	15010000	16.229	18.6541	Autosome	Autosome	Chr_1
Chr_1	15010001	15020000	28.5689	32.4597	Autosome	Autosome	Chr_1
Chr_1	15020001	15030000	28.2645	28.3295	Autosome	Autosome	Chr_1
Chr_1	15030001	15040000	13.8933	14.9669	Autosome	Autosome	Chr_1
Chr_1	15040001	15050000	19.5966	19.6111	Autosome	Autosome	Chr_1
Chr_1	15050001	15060000	25.1205	23.4829	Autosome	Autosome	Chr_1
Chr_1	15060001	15070000	24.6996	24.1152	Autosome	Autosome	Chr_1
Chr_1	15070001	15080000	21.7147	24.0878	Autosome	Autosome	Chr_1
Chr_1	15080001	15090000	22.1768	22.1107	Autosome	Autosome	Chr_1
Chr_1	15090001	15100000	21.5306	19.6391	Autosome	Autosome	Chr_1
Chr_1	15100001	15110000	24.4604	20.5774	Autosome	Autosome	Chr_1
Chr_1	15110001	15120000	23.9981	23.3125	Autosome	Autosome	Chr_1
Chr_1	15120001	15130000	26.579	26.1988	Autosome	Autosome	Chr_1
Chr_1	15130001	15140000	26.5919	29.5079	Autosome	Autosome	Chr_1
Chr_1	15140001	15150000	25.934	27.0044	Autosome	Autosome	Chr_1
Chr_1	15150001	15160000	26.4947	23.2646	Autosome	Autosome	Chr_1
Chr_1	15160001	15170000	24.3925	20.582	Autosome	Autosome	Chr_1
Chr_1	15170001	15180000	28.5423	25.9455	Autosome	Autosome	Chr_1
Chr_1	15180001	15190000	23.5688	23.395	Autosome	Autosome	Chr_1
Chr_1	15190001	15200000	24.3657	23.5404	Autosome	Autosome	Chr_1
Chr_1	15200001	15210000	23.5661	22.1357	Autosome	Autosome	Chr_1
Chr_1	15210001	15220000	21.2085	19.7179	Autosome	Autosome	Chr_1
Chr_1	15220001	15230000	25.0654	23.3104	Autosome	Autosome	Chr_1
Chr_1	15230001	15240000	24.2803	23.8596	Autosome	Autosome	Chr_1
Chr_1	15240001	15250000	23.6654	23.7073	Autosome	Autosome	Chr_1
Chr_1	15250001	15260000	21.9994	21.5216	Autosome	Autosome	Chr_1
Chr_1	15260001	15270000	21.6344	20.5526	Autosome	Autosome	Chr_1
Chr_1	15270001	15280000	23.3052	22.458	Autosome	Autosome	Chr_1
Chr_1	15280001	15290000	21.7107	21.936	Autosome	Autosome	Chr_1
Chr_1	15290001	15300000	23.1826	20.9579	Autosome	Autosome	Chr_1
Chr_1	15300001	15310000	19.884	22.5138	Autosome	Autosome	Chr_1
Chr_1	15310001	15320000	18.3256	20.6945	Autosome	Autosome	Chr_1
Chr_1	15320001	15330000	23.529	30.0941	Autosome	Autosome	Chr_1
Chr_1	15330001	15340000	25.5472	23.7323	Autosome	Autosome	Chr_1
Chr_1	15340001	15350000	22.5714	20.8117	Autosome	Autosome	Chr_1
Chr_1	15350001	15360000	22.5357	22.0465	Autosome	Autosome	Chr_1
Chr_1	15360001	15370000	20.7766	17.2202	Autosome	Autosome	Chr_1
Chr_1	15370001	15380000	21.4686	17.5522	Autosome	Autosome	Chr_1
Chr_1	15380001	15390000	23.1581	19.0575	Autosome	Autosome	Chr_1
Chr_1	15390001	15400000	18.6304	18.6454	Autosome	Autosome	Chr_1
Chr_1	15400001	15410000	19.7111	16.8398	Autosome	Autosome	Chr_1
Chr_1	15410001	15420000	18.2107	17.2691	Autosome	Autosome	Chr_1
Chr_1	15420001	15430000	26.8872	27.7845	Autosome	Autosome	Chr_1
Chr_1	15430001	15440000	24.645	22.6927	Autosome	Autosome	Chr_1
Chr_1	15440001	15450000	20.3408	18.5199	Autosome	Autosome	Chr_1
Chr_1	15450001	15460000	19.4126	21.1221	Autosome	Autosome	Chr_1
Chr_1	15460001	15470000	15.3913	16.9713	Autosome	Autosome	Chr_1
Chr_1	15470001	15480000	23.891	23.7441	Autosome	Autosome	Chr_1
Chr_1	15480001	15490000	18.1328	19.2428	Autosome	Autosome	Chr_1
Chr_1	15490001	15500000	18.1853	15.799	Autosome	Autosome	Chr_1
Chr_1	15500001	15510000	25.7541	25.8421	Autosome	Autosome	Chr_1
Chr_1	15510001	15520000	23.3642	19.0831	Autosome	Autosome	Chr_1
Chr_1	15520001	15530000	25.7866	24.507	Autosome	Autosome	Chr_1
Chr_1	15530001	15540000	29.3633	27.9559	Autosome	Autosome	Chr_1
Chr_1	15540001	15550000	23.3278	22.6525	Autosome	Autosome	Chr_1
Chr_1	15550001	15560000	25.0046	23.9623	Autosome	Autosome	Chr_1
Chr_1	15560001	15570000	22.3021	22.053	Autosome	Autosome	Chr_1
Chr_1	15570001	15580000	24.9131	21.4015	Autosome	Autosome	Chr_1
Chr_1	15580001	15590000	9.7647	10.2426	Autosome	Autosome	Chr_1
Chr_1	15590001	15600000	21.2704	19.8814	Autosome	Autosome	Chr_1
Chr_1	15600001	15610000	10.4384	11.4166	Autosome	Autosome	Chr_1
Chr_1	15610001	15620000	10.7623	11.6948	Autosome	Autosome	Chr_1
Chr_1	15620001	15630000	23.3965	22.2258	Autosome	Autosome	Chr_1
Chr_1	15630001	15640000	18.7962	18.6145	Autosome	Autosome	Chr_1
Chr_1	15640001	15650000	23.3093	19.5725	Autosome	Autosome	Chr_1
Chr_1	15650001	15660000	18.5232	21.2129	Autosome	Autosome	Chr_1
Chr_1	15660001	15670000	17.1203	17.1937	Autosome	Autosome	Chr_1
Chr_1	15670001	15680000	22.3902	24.4863	Autosome	Autosome	Chr_1
Chr_1	15680001	15690000	21.4994	19.3627	Autosome	Autosome	Chr_1
Chr_1	15690001	15700000	19.3028	21.7962	Autosome	Autosome	Chr_1
Chr_1	15700001	15710000	21.2634	23.2211	Autosome	Autosome	Chr_1
Chr_1	15710001	15720000	20.4877	18.9526	Autosome	Autosome	Chr_1
Chr_1	15720001	15730000	29.7148	25.1727	Autosome	Autosome	Chr_1
Chr_1	15730001	15740000	27.9179	24.0702	Autosome	Autosome	Chr_1
Chr_1	15740001	15750000	24.7046	20.7346	Autosome	Autosome	Chr_1
Chr_1	15750001	15760000	26.7	23.8153	Autosome	Autosome	Chr_1
Chr_1	15760001	15770000	25.4034	23.2552	Autosome	Autosome	Chr_1
Chr_1	15770001	15780000	24.7913	23.8133	Autosome	Autosome	Chr_1
Chr_1	15780001	15790000	25.3014	24.8434	Autosome	Autosome	Chr_1
Chr_1	15790001	15800000	28.7046	24.3203	Autosome	Autosome	Chr_1
Chr_1	15800001	15810000	23.3701	24.6291	Autosome	Autosome	Chr_1
Chr_1	15810001	15820000	23.7461	25.2909	Autosome	Autosome	Chr_1
Chr_1	15820001	15830000	20.9262	21.8709	Autosome	Autosome	Chr_1
Chr_1	15830001	15840000	24.9708	24.6777	Autosome	Autosome	Chr_1
Chr_1	15840001	15850000	24.3672	23.3413	Autosome	Autosome	Chr_1
Chr_1	15850001	15860000	18.4809	18.2818	Autosome	Autosome	Chr_1
Chr_1	15860001	15870000	23.1538	21.879	Autosome	Autosome	Chr_1
Chr_1	15870001	15880000	21.1454	22.1224	Autosome	Autosome	Chr_1
Chr_1	15880001	15890000	23.6925	20.8288	Autosome	Autosome	Chr_1
Chr_1	15890001	15900000	21.0675	19.026	Autosome	Autosome	Chr_1
Chr_1	15900001	15910000	24.1066	21.8321	Autosome	Autosome	Chr_1
Chr_1	15910001	15920000	22.4949	19.8408	Autosome	Autosome	Chr_1
Chr_1	15920001	15930000	26.6316	26.2926	Autosome	Autosome	Chr_1
Chr_1	15930001	15940000	24.3903	21.8108	Autosome	Autosome	Chr_1
Chr_1	15940001	15950000	20.4758	22.6066	Autosome	Autosome	Chr_1
Chr_1	15950001	15960000	20.9231	20.5859	Autosome	Autosome	Chr_1
Chr_1	15960001	15970000	25.5366	23.4823	Autosome	Autosome	Chr_1
Chr_1	15970001	15980000	26.9958	25.3751	Autosome	Autosome	Chr_1
Chr_1	15980001	15990000	29.1367	29.3103	Autosome	Autosome	Chr_1
Chr_1	15990001	16000000	22.1739	23.1094	Autosome	Autosome	Chr_1
Chr_1	16000001	16010000	22.0649	26.7931	Autosome	Autosome	Chr_1
Chr_1	16010001	16020000	18.1416	19.849	Autosome	Autosome	Chr_1
Chr_1	16020001	16030000	22.1793	20.8311	Autosome	Autosome	Chr_1
Chr_1	16030001	16040000	23.2047	20.3839	Autosome	Autosome	Chr_1
Chr_1	16040001	16050000	23.1108	26.0228	Autosome	Autosome	Chr_1
Chr_1	16050001	16060000	19.7556	18.0141	Autosome	Autosome	Chr_1
Chr_1	16060001	16070000	19.1827	22.7774	Autosome	Autosome	Chr_1
Chr_1	16070001	16080000	26.3188	24.4193	Autosome	Autosome	Chr_1
Chr_1	16080001	16090000	14.4123	15.6876	Autosome	Autosome	Chr_1
Chr_1	16090001	16100000	24.1241	23.9594	Autosome	Autosome	Chr_1
Chr_1	16100001	16110000	21.8389	21.9029	Autosome	Autosome	Chr_1
Chr_1	16110001	16120000	22.9668	21.6294	Autosome	Autosome	Chr_1
Chr_1	16120001	16130000	16.9593	15.942	Autosome	Autosome	Chr_1
Chr_1	16130001	16140000	23.4079	22.58	Autosome	Autosome	Chr_1
Chr_1	16140001	16150000	26.2992	25.6593	Autosome	Autosome	Chr_1
Chr_1	16150001	16160000	25.4133	27.1344	Autosome	Autosome	Chr_1
Chr_1	16160001	16170000	19.9015	21.8482	Autosome	Autosome	Chr_1
Chr_1	16170001	16180000	17.0383	19.2138	Autosome	Autosome	Chr_1
Chr_1	16180001	16190000	7.9062	7.6169	Autosome	Autosome	Chr_1
Chr_1	16190001	16200000	23.9047	22.8021	Autosome	Autosome	Chr_1
Chr_1	16200001	16210000	23.4995	26.708	Autosome	Autosome	Chr_1
Chr_1	16210001	16220000	23.2663	20.6586	Autosome	Autosome	Chr_1
Chr_1	16220001	16230000	20.6418	20.0449	Autosome	Autosome	Chr_1
Chr_1	16230001	16240000	25.2544	23.4049	Autosome	Autosome	Chr_1
Chr_1	16240001	16250000	26.9664	26.3572	Autosome	Autosome	Chr_1
Chr_1	16250001	16260000	29.9656	25.7621	Autosome	Autosome	Chr_1
Chr_1	16260001	16270000	27.4872	25.7424	Autosome	Autosome	Chr_1
Chr_1	16270001	16280000	21.6055	19.5233	Autosome	Autosome	Chr_1
Chr_1	16280001	16290000	22.6283	24.1523	Autosome	Autosome	Chr_1
Chr_1	16290001	16300000	24.1966	24.9897	Autosome	Autosome	Chr_1
Chr_1	16300001	16310000	26.367	25.1243	Autosome	Autosome	Chr_1
Chr_1	16310001	16320000	24.0948	25.2089	Autosome	Autosome	Chr_1
Chr_1	16320001	16330000	26.2585	24.362	Autosome	Autosome	Chr_1
Chr_1	16330001	16340000	21.2035	20.3173	Autosome	Autosome	Chr_1
Chr_1	16340001	16350000	22.9277	21.9773	Autosome	Autosome	Chr_1
Chr_1	16350001	16360000	22.9699	22.4122	Autosome	Autosome	Chr_1
Chr_1	16360001	16370000	21.9426	22.2626	Autosome	Autosome	Chr_1
Chr_1	16370001	16380000	8.2095	10.8295	Autosome	Autosome	Chr_1
Chr_1	16380001	16390000	14.8224	16.5336	Autosome	Autosome	Chr_1
Chr_1	16390001	16400000	27.6045	31.925	Autosome	Autosome	Chr_1
Chr_1	16400001	16410000	11.58	13.3501	Autosome	Autosome	Chr_1
Chr_1	16410001	16420000	27.446	25.3416	Autosome	Autosome	Chr_1
Chr_1	16420001	16430000	21.7152	20.8509	Autosome	Autosome	Chr_1
Chr_1	16430001	16440000	14.3414	17.0148	Autosome	Autosome	Chr_1
Chr_1	16440001	16450000	12.3672	12.3308	Autosome	Autosome	Chr_1
Chr_1	16450001	16460000	22.1337	23.3521	Autosome	Autosome	Chr_1
Chr_1	16460001	16470000	17.2445	16.4712	Autosome	Autosome	Chr_1
Chr_1	16470001	16480000	24.4113	28.3984	Autosome	Autosome	Chr_1
Chr_1	16480001	16490000	22.7069	22.5708	Autosome	Autosome	Chr_1
Chr_1	16490001	16500000	26.1292	23.8434	Autosome	Autosome	Chr_1
Chr_1	16500001	16510000	20.7284	22.0449	Autosome	Autosome	Chr_1
Chr_1	16510001	16520000	21.3961	21.1828	Autosome	Autosome	Chr_1
Chr_1	16520001	16530000	19.4434	19.8605	Autosome	Autosome	Chr_1
Chr_1	16530001	16540000	19.0937	17.5942	Autosome	Autosome	Chr_1
Chr_1	16540001	16550000	23.3578	21.4948	Autosome	Autosome	Chr_1
Chr_1	16550001	16560000	20.1496	19.6282	Autosome	Autosome	Chr_1
Chr_1	16560001	16570000	23.8705	24.5605	Autosome	Autosome	Chr_1
Chr_1	16570001	16580000	24.9217	25.1044	Autosome	Autosome	Chr_1
Chr_1	16580001	16590000	24.5647	21.8804	Autosome	Autosome	Chr_1
Chr_1	16590001	16600000	23.6843	21.9484	Autosome	Autosome	Chr_1
Chr_1	16600001	16610000	21.1421	19.6359	Autosome	Autosome	Chr_1
Chr_1	16610001	16620000	20.5564	19.8075	Autosome	Autosome	Chr_1
Chr_1	16620001	16630000	20.2612	22.3195	Autosome	Autosome	Chr_1
Chr_1	16630001	16640000	20.2347	20.1161	Autosome	Autosome	Chr_1
Chr_1	16640001	16650000	22.2341	19.8066	Autosome	Autosome	Chr_1
Chr_1	16650001	16660000	24.3397	25.6781	Autosome	Autosome	Chr_1
Chr_1	16660001	16670000	23.5278	26.6077	Autosome	Autosome	Chr_1
Chr_1	16670001	16680000	31.1949	31.4096	Autosome	Autosome	Chr_1
Chr_1	16680001	16690000	26.4697	27.8244	Autosome	Autosome	Chr_1
Chr_1	16690001	16700000	21.2729	23.3279	Autosome	Autosome	Chr_1
Chr_1	16700001	16710000	24.1937	21.7856	Autosome	Autosome	Chr_1
Chr_1	16710001	16720000	25.5353	21.8255	Autosome	Autosome	Chr_1
Chr_1	16720001	16730000	26.0107	22.0438	Autosome	Autosome	Chr_1
Chr_1	16730001	16740000	22.0026	21.6379	Autosome	Autosome	Chr_1
Chr_1	16740001	16750000	27.2393	24.3661	Autosome	Autosome	Chr_1
Chr_1	16750001	16760000	26.0245	24.3836	Autosome	Autosome	Chr_1
Chr_1	16760001	16770000	21.0005	22.2866	Autosome	Autosome	Chr_1
Chr_1	16770001	16780000	27.9009	23.1089	Autosome	Autosome	Chr_1
Chr_1	16780001	16790000	25.0397	21.116	Autosome	Autosome	Chr_1
Chr_1	16790001	16800000	21.2733	21.2438	Autosome	Autosome	Chr_1
Chr_1	16800001	16810000	24.4278	24.3961	Autosome	Autosome	Chr_1
Chr_1	16810001	16820000	20.4885	18.4919	Autosome	Autosome	Chr_1
Chr_1	16820001	16830000	22.9842	21.0922	Autosome	Autosome	Chr_1
Chr_1	16830001	16840000	22.2034	22.873	Autosome	Autosome	Chr_1
Chr_1	16840001	16850000	18.1697	20.2087	Autosome	Autosome	Chr_1
Chr_1	16850001	16860000	28.337	28.1046	Autosome	Autosome	Chr_1
Chr_1	16860001	16870000	26.4835	24.8755	Autosome	Autosome	Chr_1
Chr_1	16870001	16880000	25.7021	23.7247	Autosome	Autosome	Chr_1
Chr_1	16880001	16890000	21.2979	22.6463	Autosome	Autosome	Chr_1
Chr_1	16890001	16900000	26.38	25.3532	Autosome	Autosome	Chr_1
Chr_1	16900001	16910000	19.9567	20.4539	Autosome	Autosome	Chr_1
Chr_1	16910001	16920000	27.9575	25.1817	Autosome	Autosome	Chr_1
Chr_1	16920001	16930000	27.2855	26.3386	Autosome	Autosome	Chr_1
Chr_1	16930001	16940000	18.833	19.4905	Autosome	Autosome	Chr_1
Chr_1	16940001	16950000	20.5574	22.5379	Autosome	Autosome	Chr_1
Chr_1	16950001	16960000	20.5283	21.1764	Autosome	Autosome	Chr_1
Chr_1	16960001	16970000	20.8448	18.8235	Autosome	Autosome	Chr_1
Chr_1	16970001	16980000	20.726	21.6349	Autosome	Autosome	Chr_1
Chr_1	16980001	16990000	21.6684	17.5979	Autosome	Autosome	Chr_1
Chr_1	16990001	17000000	23.0164	25.7096	Autosome	Autosome	Chr_1
Chr_1	17000001	17010000	18.3896	19.3276	Autosome	Autosome	Chr_1
Chr_1	17010001	17020000	13.9185	12.7745	Autosome	Autosome	Chr_1
Chr_1	17020001	17030000	24.4817	25.47	Autosome	Autosome	Chr_1
Chr_1	17030001	17040000	25.0589	24.7971	Autosome	Autosome	Chr_1
Chr_1	17040001	17050000	25.0688	22.2513	Autosome	Autosome	Chr_1
Chr_1	17050001	17060000	21.333	20.6762	Autosome	Autosome	Chr_1
Chr_1	17060001	17070000	20.6733	17.6239	Autosome	Autosome	Chr_1
Chr_1	17070001	17080000	21.8296	22.938	Autosome	Autosome	Chr_1
Chr_1	17080001	17090000	22.0035	21.4865	Autosome	Autosome	Chr_1
Chr_1	17090001	17100000	20.6026	22.2007	Autosome	Autosome	Chr_1
Chr_1	17100001	17110000	18.0455	18.6999	Autosome	Autosome	Chr_1
Chr_1	17110001	17120000	22.7477	23.7345	Autosome	Autosome	Chr_1
Chr_1	17120001	17130000	26.5007	24.7356	Autosome	Autosome	Chr_1
Chr_1	17130001	17140000	18.3857	16.7085	Autosome	Autosome	Chr_1
Chr_1	17140001	17150000	12.2884	11.562	Autosome	Autosome	Chr_1
Chr_1	17150001	17160000	21.7629	20.7674	Autosome	Autosome	Chr_1
Chr_1	17160001	17170000	30.6499	28.0392	Autosome	Autosome	Chr_1
Chr_1	17170001	17180000	21.0716	21.5393	Autosome	Autosome	Chr_1
Chr_1	17180001	17190000	24.5229	20.8833	Autosome	Autosome	Chr_1
Chr_1	17190001	17200000	22.7375	23.1581	Autosome	Autosome	Chr_1
Chr_1	17200001	17210000	17.1327	19.4041	Autosome	Autosome	Chr_1
Chr_1	17210001	17220000	24.0716	25.0938	Autosome	Autosome	Chr_1
Chr_1	17220001	17230000	30.2179	30.2135	Autosome	Autosome	Chr_1
Chr_1	17230001	17240000	19.64	18.4843	Autosome	Autosome	Chr_1
Chr_1	17240001	17250000	26.1611	27.6068	Autosome	Autosome	Chr_1
Chr_1	17250001	17260000	25.5664	24.8276	Autosome	Autosome	Chr_1
Chr_1	17260001	17270000	23.2025	26.9134	Autosome	Autosome	Chr_1
Chr_1	17270001	17280000	23.4558	28.7566	Autosome	Autosome	Chr_1
Chr_1	17280001	17290000	21.9217	21.3599	Autosome	Autosome	Chr_1
Chr_1	17290001	17300000	17.0001	17.4815	Autosome	Autosome	Chr_1
Chr_1	17300001	17310000	17.739	19.1372	Autosome	Autosome	Chr_1
Chr_1	17310001	17320000	12.4961	11.437	Autosome	Autosome	Chr_1
Chr_1	17320001	17330000	24.6788	25.3298	Autosome	Autosome	Chr_1
Chr_1	17330001	17340000	22.2499	26.3386	Autosome	Autosome	Chr_1
Chr_1	17340001	17350000	8.3279	10.1043	Autosome	Autosome	Chr_1
Chr_1	17350001	17360000	41.2412	45.088	Autosome	Autosome	Chr_1
Chr_1	17360001	17370000	0.2766	0.505	Autosome	Autosome	Chr_1
Chr_1	17370001	17380000	22.2861	22.2029	Autosome	Autosome	Chr_1
Chr_1	17380001	17390000	22.9557	22.8294	Autosome	Autosome	Chr_1
Chr_1	17390001	17400000	24.867	26.0057	Autosome	Autosome	Chr_1
Chr_1	17400001	17410000	23.8093	23.1445	Autosome	Autosome	Chr_1
Chr_1	17410001	17420000	20.7984	20.5196	Autosome	Autosome	Chr_1
Chr_1	17420001	17430000	11.3556	12.2169	Autosome	Autosome	Chr_1
Chr_1	17430001	17440000	23.4773	26.9486	Autosome	Autosome	Chr_1
Chr_1	17440001	17450000	25.8393	25.8096	Autosome	Autosome	Chr_1
Chr_1	17450001	17460000	17.3252	16.3501	Autosome	Autosome	Chr_1
Chr_1	17460001	17470000	24.296	29.2297	Autosome	Autosome	Chr_1
Chr_1	17470001	17480000	20.9074	25	Autosome	Autosome	Chr_1
Chr_1	17480001	17490000	26.3098	22.1256	Autosome	Autosome	Chr_1
Chr_1	17490001	17500000	28.4653	27.4627	Autosome	Autosome	Chr_1
Chr_1	17500001	17510000	8.4088	7.8092	Autosome	Autosome	Chr_1
Chr_1	17510001	17520000	1.4931	1.8767	Autosome	Autosome	Chr_1
Chr_1	17520001	17530000	22.3394	21.6855	Autosome	Autosome	Chr_1
Chr_1	17530001	17540000	20.9854	18.4152	Autosome	Autosome	Chr_1
Chr_1	17540001	17550000	29.5627	27.7131	Autosome	Autosome	Chr_1
Chr_1	17550001	17560000	14.1746	14.1441	Autosome	Autosome	Chr_1
Chr_1	17560001	17570000	26.5753	27.387	Autosome	Autosome	Chr_1
Chr_1	17570001	17580000	29.0182	26.1182	Autosome	Autosome	Chr_1
Chr_1	17580001	17590000	19.0046	15.6551	Autosome	Autosome	Chr_1
Chr_1	17590001	17600000	20.9306	17.251	Autosome	Autosome	Chr_1
Chr_1	17600001	17610000	26.4611	23.3011	Autosome	Autosome	Chr_1
Chr_1	17610001	17620000	27.329	23.999	Autosome	Autosome	Chr_1
Chr_1	17620001	17630000	25.3645	22.9451	Autosome	Autosome	Chr_1
Chr_1	17630001	17640000	26.3768	26.3817	Autosome	Autosome	Chr_1
Chr_1	17640001	17650000	23.7487	23.9629	Autosome	Autosome	Chr_1
Chr_1	17650001	17660000	17.3899	18.7536	Autosome	Autosome	Chr_1
Chr_1	17660001	17670000	24.9044	24.2937	Autosome	Autosome	Chr_1
Chr_1	17670001	17680000	15.6821	16.1556	Autosome	Autosome	Chr_1
Chr_1	17680001	17690000	12.572	13.4078	Autosome	Autosome	Chr_1
Chr_1	17690001	17700000	24.5351	26.3922	Autosome	Autosome	Chr_1
Chr_1	17700001	17710000	23.4387	24.9167	Autosome	Autosome	Chr_1
Chr_1	17710001	17720000	22.0085	23.1069	Autosome	Autosome	Chr_1
Chr_1	17720001	17730000	20.4305	18.5955	Autosome	Autosome	Chr_1
Chr_1	17730001	17740000	0.5552	0.6747	Autosome	Autosome	Chr_1
Chr_1	17740001	17750000	13.1858	14.3017	Autosome	Autosome	Chr_1
Chr_1	17750001	17760000	14.0879	13.6329	Autosome	Autosome	Chr_1
Chr_1	17760001	17770000	3.197	4.166	Autosome	Autosome	Chr_1
Chr_1	17770001	17780000	18.9229	16.438	Autosome	Autosome	Chr_1
Chr_1	17780001	17790000	34.3872	36.5276	Autosome	Autosome	Chr_1
Chr_1	17790001	17800000	35.3823	41.3095	Autosome	Autosome	Chr_1
Chr_1	17800001	17810000	40.2992	39.8892	Autosome	Autosome	Chr_1
Chr_1	17810001	17820000	4.6459	5.5745	Autosome	Autosome	Chr_1
Chr_1	17820001	17830000	22.0483	25.0544	Autosome	Autosome	Chr_1
Chr_1	17830001	17840000	17.9824	20.0559	Autosome	Autosome	Chr_1
Chr_1	17840001	17850000	19.4574	18.2051	Autosome	Autosome	Chr_1
Chr_1	17850001	17860000	7.6651	8.1254	Autosome	Autosome	Chr_1
Chr_1	17860001	17870000	10.902	11.533	Autosome	Autosome	Chr_1
Chr_1	17870001	17880000	20.737	20.859	Autosome	Autosome	Chr_1
Chr_1	17880001	17890000	30.8329	31.4831	Autosome	Autosome	Chr_1
Chr_1	17890001	17900000	30.7694	33.2687	Autosome	Autosome	Chr_1
Chr_1	17900001	17910000	16.2051	20.1274	Autosome	Autosome	Chr_1
Chr_1	17910001	17920000	24.0672	31.5416	Autosome	Autosome	Chr_1
Chr_1	17920001	17930000	23.0758	26.6857	Autosome	Autosome	Chr_1
Chr_1	17930001	17940000	21.0364	21.9701	Autosome	Autosome	Chr_1
Chr_1	17940001	17950000	24.297	23.3752	Autosome	Autosome	Chr_1
Chr_1	17950001	17960000	23.3926	26.4744	Autosome	Autosome	Chr_1
Chr_1	17960001	17970000	25.6595	22.5235	Autosome	Autosome	Chr_1
Chr_1	17970001	17980000	19.9492	19.7657	Autosome	Autosome	Chr_1
Chr_1	17980001	17990000	23.5124	22.4944	Autosome	Autosome	Chr_1
Chr_1	17990001	18000000	22.0398	21.6934	Autosome	Autosome	Chr_1
Chr_1	18000001	18010000	18.6098	18.1635	Autosome	Autosome	Chr_1
Chr_1	18010001	18020000	25.3786	24.788	Autosome	Autosome	Chr_1
Chr_1	18020001	18030000	17.696	15.8568	Autosome	Autosome	Chr_1
Chr_1	18030001	18040000	27.5625	22.7019	Autosome	Autosome	Chr_1
Chr_1	18040001	18050000	24.2846	24.8477	Autosome	Autosome	Chr_1
Chr_1	18050001	18060000	22.2214	21.5273	Autosome	Autosome	Chr_1
Chr_1	18060001	18070000	19.3926	21.3387	Autosome	Autosome	Chr_1
Chr_1	18070001	18080000	25.7636	27.0855	Autosome	Autosome	Chr_1
Chr_1	18080001	18090000	26.1952	23.2303	Autosome	Autosome	Chr_1
Chr_1	18090001	18100000	24.1869	21.0038	Autosome	Autosome	Chr_1
Chr_1	18100001	18110000	23.7897	23.2663	Autosome	Autosome	Chr_1
Chr_1	18110001	18120000	18.681	16.8125	Autosome	Autosome	Chr_1
Chr_1	18120001	18130000	19.7073	20.205	Autosome	Autosome	Chr_1
Chr_1	18130001	18140000	26.3797	26.673	Autosome	Autosome	Chr_1
Chr_1	18140001	18150000	24.3399	23.1991	Autosome	Autosome	Chr_1
Chr_1	18150001	18160000	26.831	23.5444	Autosome	Autosome	Chr_1
Chr_1	18160001	18170000	31.3061	25.0893	Autosome	Autosome	Chr_1
Chr_1	18170001	18180000	19.697	20.0768	Autosome	Autosome	Chr_1
Chr_1	18180001	18190000	24.0022	21.2955	Autosome	Autosome	Chr_1
Chr_1	18190001	18200000	25.1868	24.2629	Autosome	Autosome	Chr_1
Chr_1	18200001	18210000	23.8759	23.8728	Autosome	Autosome	Chr_1
Chr_1	18210001	18220000	22.9118	24.383	Autosome	Autosome	Chr_1
Chr_1	18220001	18230000	21.7387	20.659	Autosome	Autosome	Chr_1
Chr_1	18230001	18240000	25.0406	21.3071	Autosome	Autosome	Chr_1
Chr_1	18240001	18250000	27.452	26.6795	Autosome	Autosome	Chr_1
Chr_1	18250001	18260000	25.0608	23.5798	Autosome	Autosome	Chr_1
Chr_1	18260001	18270000	24.4209	24.0435	Autosome	Autosome	Chr_1
Chr_1	18270001	18280000	24.6256	24.4568	Autosome	Autosome	Chr_1
Chr_1	18280001	18290000	25.5301	25.6675	Autosome	Autosome	Chr_1
Chr_1	18290001	18300000	22.2103	21.1769	Autosome	Autosome	Chr_1
Chr_1	18300001	18310000	13.2556	13.3271	Autosome	Autosome	Chr_1
Chr_1	18310001	18320000	17.9725	20.433	Autosome	Autosome	Chr_1
Chr_1	18320001	18330000	14.2587	13.2939	Autosome	Autosome	Chr_1
Chr_1	18330001	18340000	18.839	19.5152	Autosome	Autosome	Chr_1
Chr_1	18340001	18350000	24.9113	23.7384	Autosome	Autosome	Chr_1
Chr_1	18350001	18360000	26.514	25.5709	Autosome	Autosome	Chr_1
Chr_1	18360001	18370000	21.2742	20.1351	Autosome	Autosome	Chr_1
Chr_1	18370001	18380000	24.718	25.9501	Autosome	Autosome	Chr_1
Chr_1	18380001	18390000	20.1897	17.4873	Autosome	Autosome	Chr_1
Chr_1	18390001	18400000	22.0511	20.7598	Autosome	Autosome	Chr_1
Chr_1	18400001	18410000	22.8273	20.0077	Autosome	Autosome	Chr_1
Chr_1	18410001	18420000	24.0811	24.1054	Autosome	Autosome	Chr_1
Chr_1	18420001	18430000	17.0553	19.8464	Autosome	Autosome	Chr_1
Chr_1	18430001	18440000	22.1701	22.7687	Autosome	Autosome	Chr_1
Chr_1	18440001	18450000	25.5517	23.8813	Autosome	Autosome	Chr_1
Chr_1	18450001	18460000	25.9042	22.2544	Autosome	Autosome	Chr_1
Chr_1	18460001	18470000	14.2123	13.6024	Autosome	Autosome	Chr_1
Chr_1	18470001	18480000	24.8285	24.7473	Autosome	Autosome	Chr_1
Chr_1	18480001	18490000	22.3242	22.7617	Autosome	Autosome	Chr_1
Chr_1	18490001	18500000	25.4415	27.0361	Autosome	Autosome	Chr_1
Chr_1	18500001	18510000	23.975	23.9345	Autosome	Autosome	Chr_1
Chr_1	18510001	18520000	18.0295	17.7434	Autosome	Autosome	Chr_1
Chr_1	18520001	18530000	23.0008	19.9704	Autosome	Autosome	Chr_1
Chr_1	18530001	18540000	24.1743	24.703	Autosome	Autosome	Chr_1
Chr_1	18540001	18550000	19.2383	23.104	Autosome	Autosome	Chr_1
Chr_1	18550001	18560000	20.59	21.0063	Autosome	Autosome	Chr_1
Chr_1	18560001	18570000	22.4197	23.7244	Autosome	Autosome	Chr_1
Chr_1	18570001	18580000	16.2338	14.0716	Autosome	Autosome	Chr_1
Chr_1	18580001	18590000	22.3312	20.3799	Autosome	Autosome	Chr_1
Chr_1	18590001	18600000	35.2887	33.0004	Autosome	Autosome	Chr_1
Chr_1	18600001	18610000	24.0396	26.6097	Autosome	Autosome	Chr_1
Chr_1	18610001	18620000	22.2193	23.9226	Autosome	Autosome	Chr_1
Chr_1	18620001	18630000	16.0124	16.4148	Autosome	Autosome	Chr_1
Chr_1	18630001	18640000	11.3012	12.5663	Autosome	Autosome	Chr_1
Chr_1	18640001	18650000	19.211	19.8314	Autosome	Autosome	Chr_1
Chr_1	18650001	18660000	22.1495	24.5438	Autosome	Autosome	Chr_1
Chr_1	18660001	18670000	10.5922	11.5502	Autosome	Autosome	Chr_1
Chr_1	18670001	18680000	18.2706	17.3662	Autosome	Autosome	Chr_1
Chr_1	18680001	18690000	23.9547	23.9107	Autosome	Autosome	Chr_1
Chr_1	18690001	18700000	8.3776	7.5033	Autosome	Autosome	Chr_1
Chr_1	18700001	18710000	12.7525	11.495	Autosome	Autosome	Chr_1
Chr_1	18710001	18720000	20.4406	22.708	Autosome	Autosome	Chr_1
Chr_1	18720001	18730000	26.1132	27.3532	Autosome	Autosome	Chr_1
Chr_1	18730001	18740000	29.955	29.9852	Autosome	Autosome	Chr_1
Chr_1	18740001	18750000	21.4191	21.9813	Autosome	Autosome	Chr_1
Chr_1	18750001	18760000	18.329	20.3228	Autosome	Autosome	Chr_1
Chr_1	18760001	18770000	14.2082	16.8687	Autosome	Autosome	Chr_1
Chr_1	18770001	18780000	11.7754	13.0091	Autosome	Autosome	Chr_1
Chr_1	18780001	18790000	19.7779	19.9848	Autosome	Autosome	Chr_1
Chr_1	18790001	18800000	28.804	29.4138	Autosome	Autosome	Chr_1
Chr_1	18800001	18810000	24.1422	21.3791	Autosome	Autosome	Chr_1
Chr_1	18810001	18820000	23.4765	20.9645	Autosome	Autosome	Chr_1
Chr_1	18820001	18830000	22.2322	23.6711	Autosome	Autosome	Chr_1
Chr_1	18830001	18840000	19.5669	19.0303	Autosome	Autosome	Chr_1
Chr_1	18840001	18850000	19.302	17.5289	Autosome	Autosome	Chr_1
Chr_1	18850001	18860000	19.1864	16.1181	Autosome	Autosome	Chr_1
Chr_1	18860001	18870000	20.0808	18.8515	Autosome	Autosome	Chr_1
Chr_1	18870001	18880000	23.7814	21.7285	Autosome	Autosome	Chr_1
Chr_1	18880001	18890000	16.9086	18.5788	Autosome	Autosome	Chr_1
Chr_1	18890001	18900000	24.5359	23.4279	Autosome	Autosome	Chr_1
Chr_1	18900001	18910000	24.6996	24.1471	Autosome	Autosome	Chr_1
Chr_1	18910001	18920000	20.7974	20.104	Autosome	Autosome	Chr_1
Chr_1	18920001	18930000	25.989	22.805	Autosome	Autosome	Chr_1
Chr_1	18930001	18940000	25.1144	23.2634	Autosome	Autosome	Chr_1
Chr_1	18940001	18950000	18.7753	20.4818	Autosome	Autosome	Chr_1
Chr_1	18950001	18960000	25.623	21.9179	Autosome	Autosome	Chr_1
Chr_1	18960001	18970000	16.8762	18.111	Autosome	Autosome	Chr_1
Chr_1	18970001	18980000	20.2663	23.5202	Autosome	Autosome	Chr_1
Chr_1	18980001	18990000	22.9249	24.2725	Autosome	Autosome	Chr_1
Chr_1	18990001	19000000	23.6792	22.9484	Autosome	Excluded	Chr_UP
Chr_1	19000001	19010000	28.2711	21.4408	Z	Excluded	Chr_UP
Chr_1	19010001	19020000	19.5793	20.7019	Autosome	Excluded	Chr_UP
Chr_1	19020001	19030000	21.8335	22.55	Autosome	Autosome	Chr_1
Chr_1	19030001	19040000	20.4211	17.3228	Autosome	Autosome	Chr_1
Chr_1	19040001	19050000	25.2332	22.7389	Autosome	Autosome	Chr_1
Chr_1	19050001	19060000	27.4101	24.9009	Autosome	Autosome	Chr_1
Chr_1	19060001	19070000	19.8267	19.2681	Autosome	Autosome	Chr_1
Chr_1	19070001	19080000	22.5235	22.9447	Autosome	Autosome	Chr_1
Chr_1	19080001	19090000	16.0931	16.3553	Autosome	Autosome	Chr_1
Chr_1	19090001	19100000	20.2394	19.1087	Autosome	Autosome	Chr_1
Chr_1	19100001	19110000	23.8321	22.5644	Autosome	Autosome	Chr_1
Chr_1	19110001	19120000	25.0734	24.666	Autosome	Autosome	Chr_1
Chr_1	19120001	19130000	23.3138	20.1895	Autosome	Autosome	Chr_1
Chr_1	19130001	19140000	25.4387	25.7019	Autosome	Autosome	Chr_1
Chr_1	19140001	19150000	24.9141	21.8826	Autosome	Autosome	Chr_1
Chr_1	19150001	19160000	26.0186	23.7536	Autosome	Autosome	Chr_1
Chr_1	19160001	19170000	25.5411	23.777	Autosome	Autosome	Chr_1
Chr_1	19170001	19180000	25.5443	25.1609	Autosome	Autosome	Chr_1
Chr_1	19180001	19190000	26.4807	25.3468	Autosome	Autosome	Chr_1
Chr_1	19190001	19200000	25.7506	25.1272	Autosome	Autosome	Chr_1
Chr_1	19200001	19210000	24.9692	27.5853	Autosome	Autosome	Chr_1
Chr_1	19210001	19220000	26.5382	23.5123	Autosome	Autosome	Chr_1
Chr_1	19220001	19230000	23.4363	25.8179	Autosome	Autosome	Chr_1
Chr_1	19230001	19240000	26.2595	29.5355	Autosome	Autosome	Chr_1
Chr_1	19240001	19250000	27.5368	28.6218	Autosome	Autosome	Chr_1
Chr_1	19250001	19260000	18.066	18.4875	Autosome	Autosome	Chr_1
Chr_1	19260001	19270000	19.3674	22.4732	Autosome	Autosome	Chr_1
Chr_1	19270001	19280000	25.1209	26.3249	Autosome	Autosome	Chr_1
Chr_1	19280001	19290000	18.6588	20.736	Autosome	Autosome	Chr_1
Chr_1	19290001	19300000	15.9644	15.4727	Autosome	Autosome	Chr_1
Chr_1	19300001	19310000	23.4942	21.3294	Autosome	Autosome	Chr_1
Chr_1	19310001	19320000	26.7303	24.7239	Autosome	Autosome	Chr_1
Chr_1	19320001	19330000	31.9561	26.7997	Autosome	Autosome	Chr_1
Chr_1	19330001	19340000	23.275	22.4275	Autosome	Autosome	Chr_1
Chr_1	19340001	19350000	13.3023	13.5113	Autosome	Autosome	Chr_1
Chr_1	19350001	19360000	24.2891	18.6168	Autosome	Autosome	Chr_1
Chr_1	19360001	19370000	19.3866	15.8139	Autosome	Autosome	Chr_1
Chr_1	19370001	19380000	25.3443	23.9114	Autosome	Autosome	Chr_1
Chr_1	19380001	19390000	26.746	25.0226	Autosome	Autosome	Chr_1
Chr_1	19390001	19400000	19.7326	17.2866	Autosome	Autosome	Chr_1
Chr_1	19400001	19410000	18.3879	17.7862	Autosome	Autosome	Chr_1
Chr_1	19410001	19420000	24.774	25.5134	Autosome	Autosome	Chr_1
Chr_1	19420001	19430000	20.5136	21.1396	Autosome	Autosome	Chr_1
Chr_1	19430001	19440000	20.4947	22.5302	Autosome	Autosome	Chr_1
Chr_1	19440001	19450000	22.7511	20.03	Autosome	Autosome	Chr_1
Chr_1	19450001	19460000	13.6793	16.1421	Autosome	Autosome	Chr_1
Chr_1	19460001	19470000	10.6963	11.3148	Autosome	Autosome	Chr_1
Chr_1	19470001	19480000	20.5969	19.1474	Autosome	Autosome	Chr_1
Chr_1	19480001	19490000	21.6591	21.738	Autosome	Autosome	Chr_1
Chr_1	19490001	19500000	23.0659	21.8006	Autosome	Autosome	Chr_1
Chr_1	19500001	19510000	22.1368	21.5364	Autosome	Autosome	Chr_1
Chr_1	19510001	19520000	22.8084	22.0595	Autosome	Autosome	Chr_1
Chr_1	19520001	19530000	18.9279	19.9109	Autosome	Autosome	Chr_1
Chr_1	19530001	19540000	22.2203	21.173	Autosome	Autosome	Chr_1
Chr_1	19540001	19550000	17.7082	17.4794	Autosome	Autosome	Chr_1
Chr_1	19550001	19560000	17.1679	15.8227	Autosome	Autosome	Chr_1
Chr_1	19560001	19570000	22.8688	21.4016	Autosome	Autosome	Chr_1
Chr_1	19570001	19580000	21.3932	21.2193	Autosome	Autosome	Chr_1
Chr_1	19580001	19590000	26.46	23.1684	Autosome	Autosome	Chr_1
Chr_1	19590001	19600000	22.0253	23.8113	Autosome	Autosome	Chr_1
Chr_1	19600001	19610000	24.975	26.7924	Autosome	Autosome	Chr_1
Chr_1	19610001	19620000	18.8703	23.2078	Autosome	Autosome	Chr_1
Chr_1	19620001	19630000	15.9839	17.3981	Autosome	Autosome	Chr_1
Chr_1	19630001	19640000	25.6588	24.3936	Autosome	Autosome	Chr_1
Chr_1	19640001	19650000	21.1256	22.4441	Autosome	Autosome	Chr_1
Chr_1	19650001	19660000	16.734	17.5952	Autosome	Autosome	Chr_1
Chr_1	19660001	19670000	21.2925	20.3864	Autosome	Autosome	Chr_1
Chr_1	19670001	19680000	20.8652	23.7187	Autosome	Autosome	Chr_1
Chr_1	19680001	19690000	24.1333	26.8657	Autosome	Autosome	Chr_1
Chr_1	19690001	19700000	24.577	24.7143	Autosome	Autosome	Chr_1
Chr_1	19700001	19710000	18.4462	19.9157	Autosome	Autosome	Chr_1
Chr_1	19710001	19720000	45.909	45.05	Autosome	Autosome	Chr_1
Chr_1	19720001	19730000	42.7366	39.4627	Autosome	Autosome	Chr_1
Chr_1	19730001	19740000	50.8068	49.3936	Autosome	Autosome	Chr_1
Chr_1	19740001	19750000	39.8198	42.2428	Autosome	Autosome	Chr_1
Chr_1	19750001	19760000	48.7698	50.6397	Autosome	Autosome	Chr_1
Chr_1	19760001	19770000	29.6187	28.412	Autosome	Autosome	Chr_1
Chr_1	19770001	19780000	22.938	24.7018	Autosome	Autosome	Chr_1
Chr_1	19780001	19790000	22.8881	21.7849	Autosome	Autosome	Chr_1
Chr_1	19790001	19800000	22.9895	22.8779	Autosome	Autosome	Chr_1
Chr_1	19800001	19810000	21.4543	22.764	Autosome	Autosome	Chr_1
Chr_1	19810001	19820000	28.1573	26.7885	Autosome	Autosome	Chr_1
Chr_1	19820001	19830000	27.2103	26.1703	Autosome	Autosome	Chr_1
Chr_1	19830001	19840000	24.3611	23.7348	Autosome	Autosome	Chr_1
Chr_1	19840001	19850000	25.6131	25.4281	Autosome	Autosome	Chr_1
Chr_1	19850001	19860000	23.4092	23.2812	Autosome	Autosome	Chr_1
Chr_1	19860001	19870000	27.2939	25.1102	Autosome	Autosome	Chr_1
Chr_1	19870001	19880000	12.3955	10.7906	Autosome	Autosome	Chr_1
Chr_1	19880001	19890000	17.4543	16.3816	Autosome	Autosome	Chr_1
Chr_1	19890001	19900000	20.9352	18.998	Autosome	Autosome	Chr_1
Chr_1	19900001	19910000	23.8434	20.8668	Autosome	Autosome	Chr_1
Chr_1	19910001	19920000	24.199	22.6067	Autosome	Autosome	Chr_1
Chr_1	19920001	19930000	29.4589	25.68	Autosome	Autosome	Chr_1
Chr_1	19930001	19940000	24.9286	27.9632	Autosome	Autosome	Chr_1
Chr_1	19940001	19950000	21.7066	23.0759	Autosome	Autosome	Chr_1
Chr_1	19950001	19960000	23.1549	23.8855	Autosome	Autosome	Chr_1
Chr_1	19960001	19970000	22.6236	24.0192	Autosome	Autosome	Chr_1
[truncated: 34,402 more rows]
