# Supplementary material for: Evolution of gene dosage on the Z-chromosome of schistosome parasites
Source: eLife. 2018 Jul 25;7:e35684. doi: 10.7554/eLife.35684 (PMC6089595; doi:10.7554/eLife.35684)
Supplement: Figure 1—source data 3. [file elife-35684-fig1-data3.xlsx]

## Sheet: Figure 1-source data 3
Figure 1-source data 3: S. haematobium autosome vs Z-specific region assigment
Scaffold_ID_Shaem	Scaffold_length_Shaem	Depth_ERR036251_Shaem	Depth_ERR037800_Shaem	log2Fcov_Shaem	flag_Shaem
Sha_C10000639	820	2.9	9.4	3.62058641045188	Z
Sha_C10001019	821	3.2	12	3.92599941855622	Z
Sha_C10002123	826	2.9	14	4.07895134139482	Z
Sha_C10002591	828	4.1	12	4.00898878322726	Z
Sha_C10005501	840	6.2	14	4.33628338786443	Z
Sha_C10006809	845	4.4	5.9	3.36457243229586	Z
Sha_C10006823	846	3	11	3.8073549220576	Z
Sha_C10007419	848	4.2	9.7	3.79701297783614	Z
Sha_C10007921	850	1.9	7.2	3.18586654531133	Z
Sha_C10009615	857	5.1	14	4.25550073314839	Z
Sha_C10009827	858	4.5	15	4.28540221886225	Z
Sha_C10010749	862	4.8	14	4.23266075679027	Z
Sha_C10011787	867	2	6.3	3.05311133645956	Z
Sha_C10011809	867	5.2	13	4.18586654531133	Z
Sha_C10011889	867	4.6	14	4.21723071622067	Z
Sha_C10012527	870	4.6	14	4.21723071622067	Z
Sha_C10012835	872	2.9	13	3.99095486039699	Z
Sha_C10015143	882	2.7	11	3.77610398807316	Z
Sha_C10015191	883	4.5	6.2	3.41953889151378	Z
Sha_C10015955	886	5.1	9	3.81762325751143	Z
Sha_C10017941	895	3.7	6.6	3.36457243229586	Z
Sha_C10018289	897	3.9	11	3.8972404255748	Z
Sha_C10019121	901	7.1	13	4.32912359629157	Z
Sha_C10019877	905	6	12	4.16992500144231	Z
Sha_C10019947	905	5.1	16	4.39917109381982	Z
Sha_C10019961	905	3.8	11	3.88752527074159	Z
Sha_C10021245	911	4	17	4.39231742277876	Z
Sha_C10021333	912	7	13	4.32192809488736	Z
Sha_C10022997	920	5.1	15	4.32912359629157	Z
Sha_C10023025	920	5.5	14	4.28540221886225	Z
Sha_C10023471	922	3	11	3.8073549220576	Z
Sha_C10024053	925	5.9	14	4.31469652565629	Z
Sha_C10025227	931	4.7	16	4.37155886261196	Z
Sha_C10025897	934	4.8	16	4.37851162325373	Z
Sha_C10027049	940	6.2	9.1	3.93545974780529	Z
Sha_C10027215	941	4.9	12	4.07895134139482	Z
Sha_C10027223	941	4.5	13	4.12928301694497	Z
Sha_C10028011	945	3.4	9.5	3.68929916053589	Z
Sha_C10028203	946	3.5	12	3.95419631038688	Z
Sha_C10028715	949	1.4	5.8	2.84799690655495	Z
Sha_C10032121	966	4.3	16	4.34340782229781	Z
Sha_C10032181	966	3.8	12	3.98185265328974	Z
Sha_C10034763	980	2.3	11	3.73335434061383	Z
Sha_C10035453	984	2.4	3.5	2.56071495447448	Z
Sha_C10035519	984	5.3	13	4.19377174339668	Z
Sha_C10036889	992	5.8	15	4.37851162325373	Z
Sha_C10036967	992	4.1	7.3	3.51096191927738	Z
Sha_C10037263	994	6	14	4.32192809488736	Z
Sha_C10039533	1006	3.9	6.4	3.36457243229586	Z
Sha_C10041579	1018	1.9	6.7	3.10433665981474	Z
Sha_C10045409	1040	3.2	10	3.72246602447109	Z
Sha_C10045493	1041	4.4	13	4.12101540096137	Z
Sha_C10046661	1048	2.6	9.9	3.64385618977472	Z
Sha_C10048773	1060	3.8	14	4.15380533607904	Z
Sha_C10050889	1074	6.7	6.5	3.72246602447109	Z
Sha_C10051355	1077	2.8	4.6	2.88752527074159	Z
Sha_C10051995	1081	4.4	15	4.27798474729977	Z
Sha_C10054943	1100	2.9	8.6	3.52356195605701	Z
Sha_C10056675	1112	3.9	13	4.07895134139482	Z
Sha_C10057163	1115	3.9	12	3.99095486039699	Z
Sha_C10057599	1118	3.8	11	3.88752527074159	Z
Sha_C10057953	1121	6.1	13	4.25550073314839	Z
Sha_C10062585	1153	5.6	14	4.29278174922785	Z
Sha_C10063533	1160	6.2	14	4.33628338786443	Z
Sha_C10063779	1161	4.2	10	3.82781902461732	Z
Sha_C10063955	1163	2.2	7	3.20163386116965	Z
Sha_C10069461	1203	5.9	12	4.16188768237689	Z
Sha_C10072147	1224	6.4	14	4.35049724708413	Z
Sha_C10074145	1240	3	16	4.24792751344359	Z
Sha_C10074241	1240	4.1	14	4.17791779219584	Z
Sha_C10074573	1243	4.1	13	4.09592441999854	Z
Sha_C10075673	1253	4.6	11	3.96347412397489	Z
Sha_C10076181	1256	3.1	11	3.81762325751143	Z
Sha_C10076247	1257	3.5	13	4.04439411935845	Z
Sha_C10076521	1259	3.5	12	3.95419631038688	Z
Sha_C10076937	1263	5.6	15	4.36457243229586	Z
Sha_C10077521	1267	6	15	4.39231742277876	Z
Sha_C10078603	1276	2	2	2	Z
Sha_C10079587	1285	1.6	2.9	2.16992500144231	Z
Sha_C10080781	1295	4.5	13	4.12928301694497	Z
Sha_C10087125	1351	5.1	11	4.00898878322726	Z
Sha_C10087905	1358	5	11	4	Z
Sha_C10091421	1392	4.5	13	4.12928301694497	Z
Sha_C10092863	1405	1.9	2.6	2.16992500144231	Z
Sha_C10094675	1423	3.9	13	4.07895134139482	Z
Sha_C10096577	1443	4.6	9.6	3.82781902461732	Z
Sha_C10099901	1477	3.2	10	3.72246602447109	Z
Sha_C10100645	1485	4.7	14	4.22496636500027	Z
Sha_C10102365	1505	4.5	12	4.04439411935845	Z
Sha_C10103217	1515	6.9	14	4.38543103719352	Z
Sha_C10106583	1554	2.7	14	4.06177619758669	Z
Sha_C10107463	1564	4.4	14	4.20163386116965	Z
Sha_C10108517	1577	4.3	13	4.11270013274936	Z
Sha_C10108703	1580	5.1	13	4.17791779219584	Z
Sha_C10109001	1583	3.7	13	4.06177619758669	Z
Sha_C10110415	1600	4.9	16	4.38543103719352	Z
Sha_C10112143	1622	4.7	13	4.14567745519564	Z
Sha_C10116469	1680	5.1	15	4.32912359629157	Z
Sha_C10116719	1683	5.6	14	4.29278174922785	Z
Sha_C10117243	1692	4.1	7.1	3.48542682717024	Z
Sha_C10117471	1694	4.2	14	4.18586654531133	Z
Sha_C10119681	1725	3.5	15	4.20945336562895	Z
Sha_C10123393	1779	4.6	12	4.05311133645956	Z
Sha_C10123429	1780	2.6	4.3	2.78659636189081	Z
Sha_C10124633	1798	3.8	15	4.23266075679027	Z
Sha_C10128421	1861	4.5	12	4.04439411935845	Z
Sha_C10129899	1886	3.6	13	4.05311133645956	Z
Sha_C10130357	1892	3.1	13	4.00898878322726	Z
Sha_C10133287	1945	5.2	15	4.33628338786443	Z
Sha_C10134355	1964	5.7	11	4.06177619758669	Z
Sha_C10137051	2018	4.5	13	4.12928301694497	Z
Sha_C10137677	2030	4.1	15	4.25550073314839	Z
Sha_C10138275	2042	4.6	10	3.86789646399265	Z
Sha_C10142984	2142	4.4	14	4.20163386116965	Z
Sha_C10143058	2144	5.8	15	4.37851162325373	Z
Sha_C10143416	2152	4.5	15	4.28540221886225	Z
Sha_C10145608	2201	6.4	12	4.20163386116965	Z
Sha_C10147634	2251	4.5	14	4.20945336562895	Z
Sha_C10151086	2338	2.8	11	3.78659636189081	Z
Sha_C10153698	2410	3.7	11	3.877744249949	Z
Sha_C10155194	2458	4.3	14	4.19377174339668	Z
Sha_C10156770	2505	2.8	10	3.67807190511264	Z
Sha_C10159722	2602	6.4	11	4.12101540096137	Z
Sha_C10160804	2639	5.1	14	4.25550073314839	Z
Sha_C10162468	2703	4	15	4.24792751344359	Z
Sha_C10164790	2792	4.3	14	4.19377174339668	Z
Sha_C10166262	2854	5.6	15	4.36457243229586	Z
Sha_C10168840	2966	4.1	12	4.00898878322726	Z
Sha_C10173180	3187	5	14	4.24792751344359	Z
Sha_C10175006	3293	4.2	14	4.18586654531133	Z
Sha_C10176120	3358	4.9	14	4.24031432933371	Z
Sha_C10177974	3481	4.9	13	4.16188768237689	Z
Sha_C10178214	3499	4.3	15	4.27052894238072	Z
Sha_C10180968	3733	2.5	9.4	3.57288966842058	Z
Sha_C10182062	3825	4.8	15	4.30742852519225	Z
Sha_C10184040	4035	4	13	4.08746284125034	Z
Sha_C10184510	4092	4	13	4.08746284125034	Z
Sha_C10185584	4217	4.2	13	4.10433665981474	Z
Sha_C10185596	4218	5.7	15	4.37155886261196	Z
Sha_C10185786	4244	5.1	16	4.39917109381982	Z
Sha_C10190136	4930	4.4	15	4.27798474729977	Z
Sha_C10190246	4951	4.2	14	4.18586654531133	Z
Sha_C10191642	5265	3.8	13	4.0703893278914	Z
Sha_C10192508	5514	4.7	15	4.30012372456901	Z
Sha_C10192604	5548	4.5	14	4.20945336562895	Z
Sha_C10193396	5794	4.4	14	4.20163386116965	Z
Sha_C10194232	6155	3.9	14	4.16188768237689	Z
Sha_C10196412	7768	3.9	12	3.99095486039699	Z
Sha_C10197058	8740	4.1	16	4.32912359629157	Z
Sha_C10197490	9908	4.8	14	4.23266075679027	Z
Sha_C9072193	100	1.8	2.4	2.0703893278914	Z
Sha_C9072197	100	3.3	6.6	3.30742852519225	Z
Sha_C9072201	100	3.3	5.9	3.20163386116965	Z
Sha_C9072215	100	3.9	12	3.99095486039699	Z
Sha_C9072267	100	2.7	6	3.12101540096137	Z
Sha_C9072315	100	3.6	3.7	2.86789646399265	Z
Sha_C9072345	100	2	3.6	2.48542682717024	Z
Sha_C9072389	100	1.8	2.9	2.23266075679027	Z
Sha_C9072407	100	1.6	8.3	3.30742852519225	Z
Sha_C9072509	100	3	11	3.8073549220576	Z
Sha_C9072511	100	4	10	3.8073549220576	Z
Sha_C9072595	100	4.9	13	4.16188768237689	Z
Sha_C9072605	100	1.5	1.9	1.76553474636298	Z
Sha_C9072621	100	2.5	11	3.75488750216347	Z
Sha_C9072649	100	2.7	3.3	2.58496250072116	Z
Sha_C9072655	100	1.9	2.5	2.13750352374994	Z
Sha_C9072717	100	1.5	3	2.16992500144231	Z
Sha_C9072771	100	3.5	5.4	3.15380533607904	Z
Sha_C9072809	100	2	1.2	1.67807190511264	Z
Sha_C9072811	100	1.6	4.4	2.58496250072116	Z
Sha_C9072951	100	3.3	3.2	2.70043971814109	Z
Sha_C9072955	100	3.1	8.6	3.54843662469604	Z
Sha_C9072985	100	2	2.8	2.26303440583379	Z
Sha_C9073035	100	2.2	9.1	3.49825086752783	Z
Sha_C9073061	100	2.6	7.8	3.37851162325373	Z
Sha_C9073095	100	2.8	5.1	2.98185265328974	Z
Sha_C9073097	100	3.2	10	3.72246602447109	Z
Sha_C9073175	100	3.5	9	3.64385618977472	Z
Sha_C9073227	100	2.8	10	3.67807190511264	Z
Sha_C9073269	100	3	8.8	3.56071495447448	Z
Sha_C9073323	100	1.9	9.9	3.56071495447448	Z
Sha_C9073395	100	4.2	9.2	3.74416109557041	Z
Sha_C9073407	100	2	1.9	1.96347412397489	Z
Sha_C9073427	100	2.9	7.7	3.40599235967584	Z
Sha_C9073467	100	1.8	11	3.67807190511264	Z
Sha_C9073479	100	1.5	4	2.4594316186373	Z
Sha_C9073721	100	2.4	11	3.74416109557041	Z
Sha_C9073887	100	4.2	11	3.92599941855622	Z
Sha_C9073925	100	3.9	5.5	3.23266075679027	Z
Sha_C9073985	100	2.4	2.3	2.23266075679027	Z
Sha_C9074035	100	1.6	2.4	2	Z
Sha_C9074125	100	4.2	14	4.18586654531133	Z
Sha_C9074153	100	5.5	6.4	3.57288966842058	Z
Sha_C9074187	100	4	5.3	3.21723071622067	Z
Sha_C9074193	100	1.9	11	3.68929916053589	Z
Sha_C9074329	100	1.8	5.1	2.78659636189081	Z
Sha_C9074355	100	4.7	8.4	3.71149490665009	Z
Sha_C9074445	100	3.4	9.9	3.73335434061383	Z
Sha_C9074449	100	3	5.7	3.12101540096137	Z
Sha_C9074451	100	4.5	5.8	3.36457243229586	Z
Sha_C9074477	100	3.2	7	3.35049724708413	Z
Sha_C9074481	100	1.5	3.3	2.26303440583379	Z
Sha_C9074563	100	2	2.9	2.29278174922785	Z
Sha_C9074571	100	1.5	7	3.08746284125034	Z
Sha_C9074623	100	2.7	9.6	3.62058641045188	Z
Sha_C9074629	100	3.8	6.8	3.40599235967584	Z
Sha_C9074677	100	2.9	3.7	2.72246602447109	Z
Sha_C9074719	100	2.4	8.1	3.39231742277876	Z
Sha_C9074725	100	1.8	4.4	2.63226821549951	Z
Sha_C9074733	100	2	4.2	2.63226821549951	Z
Sha_C9074761	100	3.3	6.8	3.33628338786443	Z
Sha_C9074773	100	3	3.2	2.63226821549951	Z
Sha_C9074775	100	1.9	9.4	3.49825086752783	Z
Sha_C9074799	100	1.6	3.1	2.23266075679027	Z
Sha_C9074881	100	3.6	5.7	3.21723071622067	Z
Sha_C9075013	100	2.2	14	4.01792190799726	Z
Sha_C9075029	100	1.6	12	3.76553474636298	Z
Sha_C9075041	100	1.2	10	3.48542682717024	Z
Sha_C9075047	100	1.5	6.5	3	Z
Sha_C9075085	100	2.3	3.1	2.43295940727611	Z
Sha_C9075093	100	2.7	12	3.877744249949	Z
Sha_C9075153	100	1.7	3.9	2.48542682717024	Z
Sha_C9075219	100	2.5	12	3.85798099512757	Z
Sha_C9075237	100	2	4	2.58496250072116	Z
Sha_C9075425	100	5.1	13	4.17791779219584	Z
Sha_C9075433	100	1.8	4	2.53605290024021	Z
Sha_C9075537	100	1.7	1.8	1.8073549220576	Z
Sha_C9075543	100	4.7	9.4	3.81762325751143	Z
Sha_C9075587	100	4.8	14	4.23266075679027	Z
Sha_C9075589	100	3.7	12	3.97269265400426	Z
Sha_C9075631	100	2.5	9.3	3.56071495447448	Z
Sha_C9075769	100	3.8	2.9	2.74416109557041	Z
Sha_C9075775	100	1.9	1.7	1.84799690655495	Z
Sha_C9075831	100	1.6	6.7	3.05311133645956	Z
Sha_C9075903	100	5.1	8.8	3.79701297783614	Z
Sha_C9075929	100	4	10	3.8073549220576	Z
Sha_C9075931	100	3.1	3.8	2.78659636189081	Z
Sha_C9075953	100	1.4	4.5	2.56071495447448	Z
Sha_C9075955	100	4.4	11	3.94485844580754	Z
Sha_C9075995	100	2.5	3.2	2.51096191927738	Z
Sha_C9076011	100	3	5.5	3.08746284125034	Z
Sha_C9076049	100	4.1	9.7	3.78659636189081	Z
Sha_C9076101	100	1.8	4.2	2.58496250072116	Z
Sha_C9076189	100	2.6	6.6	3.20163386116965	Z
Sha_C9076217	100	2.9	10	3.68929916053589	Z
Sha_C9076233	100	4.7	8.9	3.76553474636298	Z
Sha_C9076239	100	1.9	4.4	2.65535182861255	Z
Sha_C9076261	100	2.8	8.3	3.47248777146274	Z
Sha_C9076431	100	1.7	6.5	3.03562390973072	Z
Sha_C9076449	100	3.4	9.1	3.64385618977472	Z
Sha_C9076451	100	3	5.1	3.01792190799726	Z
Sha_C9076539	100	4.1	6.3	3.37851162325373	Z
Sha_C9076565	100	4.3	10	3.83794324189103	Z
Sha_C9076577	100	1.9	5	2.78659636189081	Z
Sha_C9076731	100	1.9	12	3.79701297783614	Z
Sha_C9076745	100	4.3	9.5	3.78659636189081	Z
Sha_C9076759	100	3.8	7.6	3.51096191927738	Z
Sha_C9076799	100	4.2	3.9	3.01792190799726	Z
Sha_C9076825	100	1.8	4.4	2.63226821549951	Z
Sha_C9076839	100	1.6	6.1	2.94485844580754	Z
Sha_C9076865	100	2.9	5.8	3.12101540096137	Z
Sha_C9076995	100	3.1	11	3.81762325751143	Z
Sha_C9077011	100	5.2	8.1	3.73335434061383	Z
Sha_C9077073	100	2.1	1.9	2	Z
Sha_C9077085	100	4.3	6.5	3.43295940727611	Z
Sha_C9077107	100	3.8	4.6	3.0703893278914	Z
Sha_C9077169	100	1.7	6.5	3.03562390973072	Z
Sha_C9077187	100	2.7	7.3	3.32192809488736	Z
Sha_C9077197	100	3.1	9.1	3.60880924267552	Z
Sha_C9077303	100	3.3	10	3.73335434061383	Z
Sha_C9077337	100	1.7	8	3.27798474729977	Z
Sha_C9077343	100	1.6	4.7	2.65535182861255	Z
Sha_C9077363	100	4.6	13	4.13750352374993	Z
Sha_C9077387	100	1.8	5	2.76553474636298	Z
Sha_C9077433	100	1.8	2.6	2.13750352374994	Z
Sha_C9077607	100	2.2	3.9	2.60880924267552	Z
Sha_C9077705	100	4.4	13	4.12101540096137	Z
Sha_C9077725	100	1.9	4.4	2.65535182861255	Z
Sha_C9077743	100	2.9	5.9	3.13750352374994	Z
Sha_C9077867	100	1.8	2.9	2.23266075679027	Z
Sha_C9077869	100	2	2	2	Z
Sha_C9077911	100	2.6	10	3.65535182861255	Z
Sha_C9077975	100	1.6	8.2	3.29278174922785	Z
Sha_C9077983	100	4.6	6.6	3.48542682717024	Z
Sha_C9077985	100	2.6	3.5	2.60880924267552	Z
Sha_C9078017	100	4	7.7	3.54843662469604	Z
Sha_C9078063	100	2.4	5.7	3.01792190799726	Z
Sha_C9078175	100	4.7	8.1	3.67807190511264	Z
Sha_C9078251	100	2.4	12	3.84799690655495	Z
Sha_C9078307	100	2.1	9.4	3.52356195605701	Z
Sha_C9078339	100	2.8	3.4	2.63226821549951	Z
Sha_C9078415	100	3.1	15	4.17791779219584	Z
Sha_C9078493	100	2.6	5.9	3.08746284125034	Z
Sha_C9078527	100	5.1	8.2	3.73335434061383	Z
Sha_C9078537	100	5.1	14	4.25550073314839	Z
Sha_C9078559	100	2.6	15	4.13750352374993	Z
Sha_C9078587	100	3.7	12	3.97269265400426	Z
Sha_C9078625	100	1.9	6.3	3.03562390973072	Z
Sha_C9078649	100	2.9	11	3.79701297783614	Z
Sha_C9078793	100	2.9	2.4	2.40599235967584	Z
Sha_C9078929	100	1.6	6.2	2.96347412397489	Z
Sha_C9078953	100	2	1.9	1.96347412397489	Z
Sha_C9078967	100	4.1	8.4	3.64385618977472	Z
Sha_C9079009	100	4.1	13	4.09592441999854	Z
Sha_C9079063	100	4.2	10	3.82781902461732	Z
Sha_C9079165	100	1.5	2.4	1.96347412397489	Z
Sha_C9079357	100	2.4	5	2.88752527074159	Z
Sha_C9079365	100	1.9	4.7	2.72246602447109	Z
Sha_C9079433	100	4.4	14	4.20163386116965	Z
Sha_C9079499	100	4.1	11	3.91647664443772	Z
Sha_C9079507	100	2.2	6.1	3.05311133645956	Z
Sha_C9079571	100	2.3	13	3.93545974780529	Z
Sha_C9079585	100	2.2	6	3.03562390973072	Z
Sha_C9079595	100	2	8.1	3.33628338786443	Z
Sha_C9079685	100	3.1	5.4	3.08746284125034	Z
Sha_C9079721	100	2.5	10	3.64385618977472	Z
Sha_C9079795	100	3	13	4	Z
Sha_C9079859	100	1.8	9.2	3.4594316186373	Z
Sha_C9079941	100	1.8	14	3.98185265328974	Z
Sha_C9080047	100	3.2	7.5	3.41953889151378	Z
Sha_C9080099	100	5.6	15	4.36457243229586	Z
Sha_C9080201	100	1.9	6.5	3.0703893278914	Z
Sha_C9080213	100	8.1	10	4.17791779219584	Z
Sha_C9080221	100	1.9	7.2	3.18586654531133	Z
Sha_C9080233	100	1.8	2	1.92599941855622	Z
Sha_C9080235	100	1.9	5.5	2.88752527074159	Z
Sha_C9080355	100	1.7	2.7	2.13750352374994	Z
Sha_C9080365	100	2.7	7.9	3.40599235967584	Z
Sha_C9080383	100	2.9	7	3.30742852519225	Z
Sha_C9080431	100	2.5	12	3.85798099512757	Z
Sha_C9080589	100	2	12	3.8073549220576	Z
Sha_C9080615	100	1.8	2	1.92599941855622	Z
Sha_C9080645	100	1.8	8	3.29278174922785	Z
Sha_C9080745	100	2.9	5	2.98185265328974	Z
Sha_C9080749	100	1.9	6.4	3.05311133645956	Z
Sha_C9080801	100	2.5	6.6	3.18586654531133	Z
Sha_C9080815	100	1.9	6.3	3.03562390973072	Z
Sha_C9080825	100	2	6.7	3.12101540096137	Z
Sha_C9080883	100	4.3	9.6	3.79701297783614	Z
Sha_C9080945	100	2.5	5.9	3.0703893278914	Z
Sha_C9080961	100	1.6	17	4.21723071622067	Z
Sha_C9080979	100	1.9	4.7	2.72246602447109	Z
Sha_C9081115	100	1.4	4.4	2.53605290024021	Z
Sha_C9081133	100	4	9.3	3.73335434061383	Z
Sha_C9081257	100	1.7	10	3.54843662469604	Z
Sha_C9081303	100	4.1	11	3.91647664443772	Z
Sha_C9081349	100	5.3	8.1	3.74416109557041	Z
Sha_C9081359	100	4.7	9.9	3.86789646399265	Z
Sha_C9081449	100	2.2	8	3.35049724708413	Z
Sha_C9081451	100	5.2	12	4.10433665981474	Z
Sha_C9081497	100	2.8	16	4.23266075679027	Z
Sha_C9081503	100	2	2.3	2.10433665981474	Z
Sha_C9081565	100	2.5	3.2	2.51096191927738	Z
Sha_C9081571	100	2.7	8.4	3.47248777146274	Z
Sha_C9081591	100	4.8	13	4.15380533607904	Z
Sha_C9081814	100	4.2	3.9	3.01792190799726	Z
Sha_C9081892	100	4.6	8.9	3.75488750216347	Z
Sha_C9081902	100	2.8	11	3.78659636189081	Z
Sha_C9081948	100	5.8	15	4.37851162325373	Z
Sha_C9081972	100	2.7	5.8	3.08746284125034	Z
Sha_C9082024	100	1.9	2.7	2.20163386116965	Z
Sha_C9082292	100	3.8	4.6	3.0703893278914	Z
Sha_C9082372	100	6.3	9.6	3.99095486039699	Z
Sha_C9082402	100	3.2	15	4.18586654531133	Z
Sha_C9082556	100	5.9	10	3.99095486039699	Z
Sha_C9082578	100	2.6	11	3.76553474636298	Z
Sha_C9082688	100	3.5	5.1	3.10433665981474	Z
Sha_C9082714	100	1.8	5	2.76553474636298	Z
Sha_C9082716	100	3.3	3.6	2.78659636189081	Z
Sha_C9082780	100	2.7	2.9	2.48542682717024	Z
Sha_C9082884	100	2.9	4.7	2.92599941855622	Z
Sha_C9082996	100	2.2	12	3.82781902461732	Z
Sha_C9083114	100	1.9	8.4	3.36457243229586	Z
Sha_C9083136	100	4.3	7.7	3.58496250072116	Z
Sha_C9083186	100	3.7	9	3.6667565918848	Z
Sha_C9083204	100	6.4	9.4	3.98185265328974	Z
Sha_C9083250	100	2.5	9.6	3.59693514238723	Z
Sha_C9083260	100	4.5	8.3	3.67807190511264	Z
Sha_C9083268	100	1.7	8.6	3.36457243229586	Z
Sha_C9083300	100	2	4.3	2.65535182861255	Z
Sha_C9083306	100	3.8	6.5	3.36457243229586	Z
Sha_C9083362	100	2.7	3.7	2.67807190511264	Z
Sha_C9083396	100	3.1	8.9	3.58496250072116	Z
Sha_C9083432	100	2.3	8.7	3.4594316186373	Z
Sha_C9083434	100	2.6	5.1	2.94485844580754	Z
Sha_C9083448	100	3.8	4	2.96347412397489	Z
Sha_C9083468	100	1.8	1.9	1.88752527074159	Z
Sha_C9083474	100	6	9.2	3.92599941855622	Z
Sha_C9083498	100	2.8	6	3.13750352374994	Z
Sha_C9083578	100	3.3	3.8	2.82781902461732	Z
Sha_C9083654	101	1.9	3.8	2.51096191927738	Z
Sha_C9083726	101	1.9	5.2	2.82781902461732	Z
Sha_C9083728	101	1.5	5.6	2.82781902461732	Z
Sha_C9083754	101	2.4	5.5	2.98185265328974	Z
Sha_C9083778	101	2.1	4.8	2.78659636189081	Z
Sha_C9083888	101	2.3	2.6	2.29278174922785	Z
Sha_C9084078	101	3.1	3.9	2.8073549220576	Z
Sha_C9084160	101	6.8	14	4.37851162325373	Z
Sha_C9084176	101	2.9	9	3.57288966842058	Z
Sha_C9084254	101	3.3	3.7	2.8073549220576	Z
Sha_C9084318	101	5.9	14	4.31469652565629	Z
Sha_C9084386	101	2	5	2.8073549220576	Z
Sha_C9084404	101	4.5	8.9	3.74416109557041	Z
Sha_C9084424	101	4.6	16	4.36457243229586	Z
Sha_C9084436	101	1.9	8.5	3.37851162325373	Z
Sha_C9084446	101	3	10	3.70043971814109	Z
Sha_C9084588	101	2	11	3.70043971814109	Z
Sha_C9084608	101	4.5	9.7	3.82781902461732	Z
Sha_C9084622	101	7	13	4.32192809488736	Z
Sha_C9084624	101	2.5	1.6	2.03562390973072	Z
Sha_C9084720	101	4.4	7.8	3.60880924267552	Z
Sha_C9084722	101	1.7	2	1.88752527074159	Z
Sha_C9084756	101	2.6	11	3.76553474636298	Z
Sha_C9084844	101	4	6.7	3.41953889151378	Z
Sha_C9084874	101	4.8	14	4.23266075679027	Z
Sha_C9084900	101	4.8	15	4.30742852519225	Z
Sha_C9084966	101	5.9	8.9	3.88752527074159	Z
Sha_C9085018	101	1.7	2.8	2.16992500144231	Z
Sha_C9085048	101	2.2	10	3.60880924267552	Z
Sha_C9085052	101	4	5.3	3.21723071622067	Z
Sha_C9085128	101	5.4	14	4.27798474729977	Z
Sha_C9085146	101	3.1	3.6	2.74416109557041	Z
Sha_C9085158	101	3.9	4.9	3.13750352374994	Z
Sha_C9085178	101	5.9	8.3	3.82781902461732	Z
Sha_C9085202	101	4.7	5.9	3.40599235967584	Z
Sha_C9085256	101	4.3	12	4.02680005934372	Z
Sha_C9085324	101	2.6	4.2	2.76553474636298	Z
Sha_C9085358	101	2	4.2	2.63226821549951	Z
Sha_C9085364	101	3.3	10	3.73335434061383	Z
Sha_C9085394	101	5	6.1	3.47248777146274	Z
Sha_C9085464	101	5.6	8.9	3.85798099512757	Z
Sha_C9085470	101	3.9	9.4	3.73335434061383	Z
Sha_C9085594	101	4.9	6.9	3.56071495447448	Z
Sha_C9085664	101	8.9	12	4.38543103719352	Z
Sha_C9085772	101	1.2	9.4	3.40599235967584	Z
Sha_C9085864	101	1.2	3.9	2.35049724708413	Z
Sha_C9085938	101	2.8	5	2.96347412397489	Z
Sha_C9085998	101	3.2	5.1	3.05311133645956	Z
Sha_C9086138	101	4.1	6.7	3.43295940727611	Z
Sha_C9086192	101	3.4	8.5	3.57288966842058	Z
Sha_C9086278	101	2.2	7.9	3.33628338786443	Z
Sha_C9086348	101	3.7	12	3.97269265400426	Z
Sha_C9086388	101	1.9	8.3	3.35049724708413	Z
Sha_C9086468	101	1.4	12	3.74416109557041	Z
Sha_C9086490	101	4.3	5.6	3.30742852519225	Z
Sha_C9086546	101	4	6	3.32192809488736	Z
Sha_C9086586	101	4.1	16	4.32912359629157	Z
Sha_C9086638	101	4.8	10	3.88752527074159	Z
Sha_C9086670	101	1.9	3.9	2.53605290024021	Z
Sha_C9086688	101	1.5	3.6	2.35049724708413	Z
Sha_C9086696	101	3.9	15	4.24031432933371	Z
Sha_C9086718	101	3	8.2	3.48542682717024	Z
Sha_C9086940	101	1.9	7.4	3.21723071622067	Z
Sha_C9086970	101	2.3	13	3.93545974780529	Z
Sha_C9086994	101	2	13	3.90689059560852	Z
Sha_C9087016	101	2.9	9.8	3.6667565918848	Z
Sha_C9087046	101	1.6	1.9	1.8073549220576	Z
Sha_C9087112	101	3.1	7.5	3.40599235967584	Z
Sha_C9087148	101	2.7	6.6	3.21723071622067	Z
Sha_C9087240	101	4	6.6	3.40599235967584	Z
Sha_C9087284	101	2.5	9.9	3.63226821549951	Z
Sha_C9087330	101	1.4	4.2	2.48542682717024	Z
Sha_C9087394	101	2.2	7.1	3.21723071622067	Z
Sha_C9087482	101	3.3	17	4.34340782229781	Z
Sha_C9087484	101	7.5	8.7	4.01792190799726	Z
Sha_C9087528	101	2.5	7.3	3.29278174922785	Z
Sha_C9087540	101	1.4	6.7	3.01792190799726	Z
Sha_C9087542	101	5.5	7.7	3.72246602447109	Z
Sha_C9087564	101	3.4	5.2	3.10433665981474	Z
Sha_C9087566	101	2	14	4	Z
Sha_C9087620	101	2.3	7.8	3.33628338786443	Z
Sha_C9087682	101	1.4	8.5	3.30742852519225	Z
Sha_C9087702	101	1.8	2.6	2.13750352374994	Z
Sha_C9087722	101	6.6	8	3.86789646399265	Z
Sha_C9087766	101	3	8.9	3.57288966842058	Z
Sha_C9087808	101	2.3	12	3.83794324189103	Z
Sha_C9087870	101	2	6.3	3.05311133645956	Z
Sha_C9087912	101	1.9	3.2	2.35049724708413	Z
Sha_C9087960	101	2.5	4.2	2.74416109557041	Z
Sha_C9088030	101	3	10	3.70043971814109	Z
Sha_C9088058	101	3.4	4.8	3.03562390973072	Z
Sha_C9088076	101	5.4	7.5	3.68929916053589	Z
Sha_C9088156	101	2.3	11	3.73335434061383	Z
Sha_C9088162	101	1.6	1.7	1.72246602447109	Z
Sha_C9088186	101	2.9	6.4	3.21723071622067	Z
Sha_C9088188	101	4.4	13	4.12101540096137	Z
Sha_C9088278	101	3.3	12	3.93545974780529	Z
Sha_C9088366	101	3.7	9	3.6667565918848	Z
Sha_C9088400	101	6.9	14	4.38543103719352	Z
Sha_C9088418	101	2.8	3.2	2.58496250072116	Z
Sha_C9088446	101	3.4	3.6	2.8073549220576	Z
Sha_C9088448	101	1.6	7.1	3.12101540096137	Z
Sha_C9088454	101	1.9	8.3	3.35049724708413	Z
Sha_C9088456	101	5.4	9.4	3.88752527074159	Z
Sha_C9088502	101	1.8	3.2	2.32192809488736	Z
Sha_C9088512	101	5.9	9	3.8972404255748	Z
Sha_C9088544	101	7.5	13	4.35755200461808	Z
Sha_C9088564	101	2.4	6.4	3.13750352374994	Z
Sha_C9088576	101	6.9	8.6	3.95419631038688	Z
Sha_C9088648	101	1.4	3.4	2.26303440583379	Z
Sha_C9088736	101	2	4.1	2.60880924267552	Z
Sha_C9088766	101	6.1	5.3	3.51096191927738	Z
Sha_C9088772	101	1.7	2.7	2.13750352374994	Z
Sha_C9088862	101	1.8	11	3.67807190511264	Z
Sha_C9088872	101	2.9	9	3.57288966842058	Z
Sha_C9088874	101	4.4	16	4.35049724708413	Z
Sha_C9088912	101	3.2	4.8	3	Z
Sha_C9088932	101	3.6	2.8	2.67807190511264	Z
Sha_C9088954	101	1.9	15	4.07895134139482	Z
Sha_C9089036	101	2.9	6.9	3.29278174922785	Z
Sha_C9089090	101	1.8	6.8	3.10433665981474	Z
Sha_C9089240	101	3.2	8.1	3.49825086752783	Z
Sha_C9089246	101	1.8	5.2	2.8073549220576	Z
Sha_C9089282	101	1.9	1.7	1.84799690655495	Z
Sha_C9089300	101	1.5	5.7	2.84799690655495	Z
Sha_C9089326	101	2.7	7.1	3.29278174922785	Z
Sha_C9089362	101	3.1	8.8	3.57288966842058	Z
Sha_C9089376	101	4.3	6	3.36457243229586	Z
Sha_C9089434	101	7	13	4.32192809488736	Z
Sha_C9089480	101	2	6.2	3.03562390973072	Z
Sha_C9089504	101	1.3	4.4	2.51096191927738	Z
Sha_C9089536	101	6.8	12	4.23266075679027	Z
Sha_C9089558	101	3.3	5.1	3.0703893278914	Z
Sha_C9089620	101	2.7	5	2.94485844580754	Z
Sha_C9089732	101	2.5	6.1	3.10433665981474	Z
Sha_C9089786	101	4.7	11	3.97269265400426	Z
Sha_C9089822	101	4.2	11	3.92599941855622	Z
Sha_C9089852	101	3.8	9.1	3.68929916053589	Z
Sha_C9089912	101	2.3	10	3.62058641045188	Z
Sha_C9089946	101	3.7	5.2	3.15380533607904	Z
Sha_C9089964	101	2	4	2.58496250072116	Z
Sha_C9089968	101	1.9	10	3.57288966842058	Z
Sha_C9090012	101	3.4	9.9	3.73335434061383	Z
Sha_C9090018	101	3.9	15	4.24031432933371	Z
Sha_C9090054	101	4.3	8.8	3.71149490665009	Z
Sha_C9090106	101	3.7	8.1	3.56071495447448	Z
Sha_C9090118	101	1.6	3.5	2.35049724708413	Z
Sha_C9090130	101	4	8	3.58496250072116	Z
Sha_C9090258	101	1.9	5.8	2.94485844580754	Z
Sha_C9090270	101	3.4	15	4.20163386116965	Z
Sha_C9090286	101	3.1	5.6	3.12101540096137	Z
Sha_C9090294	101	3.1	4.5	2.92599941855622	Z
Sha_C9090342	101	1.9	5.1	2.8073549220576	Z
Sha_C9090616	101	3.3	4.7	3	Z
Sha_C9090654	101	4.5	9.4	3.79701297783614	Z
Sha_C9090770	101	6.1	8.5	3.86789646399265	Z
Sha_C9090906	101	2.5	4.9	2.88752527074159	Z
Sha_C9090958	101	1.5	3.3	2.26303440583379	Z
Sha_C9090962	101	6.5	6.2	3.6667565918848	Z
Sha_C9090980	101	1.8	6.8	3.10433665981474	Z
Sha_C9091068	101	5.3	3.7	3.16992500144231	Z
Sha_C9091194	101	5.1	14	4.25550073314839	Z
Sha_C9091222	101	5.3	5	3.36457243229586	Z
Sha_C9091296	101	1.7	6.4	3.01792190799726	Z
Sha_C9091340	101	2.1	8.6	3.41953889151378	Z
Sha_C9091352	101	2	1.8	1.92599941855622	Z
Sha_C9091376	101	2.2	8.9	3.47248777146274	Z
Sha_C9091388	101	3.7	6.3	3.32192809488736	Z
Sha_C9091438	101	1.7	8.1	3.29278174922785	Z
Sha_C9091542	101	3.6	7.4	3.4594316186373	Z
Sha_C9091602	101	2.4	4.1	2.70043971814109	Z
Sha_C9091644	101	1.9	6.5	3.0703893278914	Z
Sha_C9091666	101	2.9	5.1	3	Z
Sha_C9091748	101	6.1	7.4	3.75488750216347	Z
Sha_C9091842	101	1.7	3.6	2.40599235967584	Z
Sha_C9091852	101	6.2	8.3	3.85798099512757	Z
Sha_C9091944	101	6.2	12	4.18586654531133	Z
Sha_C9092042	101	3.9	4.2	3.01792190799726	Z
Sha_C9092088	101	2	2	2	Z
Sha_C9092102	101	3.5	4	2.90689059560852	Z
Sha_C9092136	101	3.1	6.3	3.23266075679027	Z
Sha_C9092204	101	1.9	11	3.68929916053589	Z
Sha_C9092268	101	2.5	8.2	3.41953889151378	Z
Sha_C9092362	101	2.6	6.5	3.18586654531133	Z
Sha_C9092370	101	1.5	3.1	2.20163386116965	Z
Sha_C9092482	101	3.9	12	3.99095486039699	Z
Sha_C9092510	101	1.6	7.9	3.24792751344359	Z
Sha_C9092554	101	3.5	9.9	3.74416109557041	Z
Sha_C9092578	101	2.8	5.2	3	Z
Sha_C9092624	101	2.2	7.6	3.29278174922785	Z
Sha_C9092750	101	5	11	4	Z
Sha_C9092796	101	4.7	12	4.06177619758669	Z
Sha_C9092822	101	3.3	8.2	3.52356195605701	Z
Sha_C9092832	101	5.4	12	4.12101540096137	Z
Sha_C9092912	101	3.1	9.6	3.6667565918848	Z
Sha_C9093014	101	1.9	2.5	2.13750352374994	Z
Sha_C9093028	101	1.4	6.1	2.90689059560852	Z
Sha_C9093062	101	1.9	6	2.98185265328974	Z
Sha_C9093064	101	3.3	12	3.93545974780529	Z
Sha_C9093104	101	5.1	11	4.00898878322726	Z
Sha_C9093132	101	1.8	3.8	2.48542682717024	Z
Sha_C9093234	101	3.3	4.9	3.03562390973072	Z
Sha_C9093258	101	3.2	9.8	3.70043971814109	Z
Sha_C9093264	101	2.9	4.2	2.82781902461732	Z
Sha_C9093408	101	2	8.8	3.43295940727611	Z
Sha_C9093436	101	2.6	8.7	3.49825086752783	Z
Sha_C9093444	101	3.6	13	4.05311133645956	Z
Sha_C9093460	101	1.6	10	3.53605290024021	Z
Sha_C9093480	101	3.3	5	3.05311133645956	Z
Sha_C9093482	101	1.9	1.9	1.92599941855622	Z
Sha_C9093514	101	5.7	7.7	3.74416109557041	Z
Sha_C9093538	101	3.2	11	3.82781902461732	Z
Sha_C9093598	101	2.4	12	3.84799690655495	Z
Sha_C9093642	101	5.1	12	4.09592441999854	Z
Sha_C9093708	101	2.5	1.8	2.10433665981474	Z
Sha_C9093800	101	3.3	11	3.83794324189103	Z
Sha_C9093846	101	1.8	3	2.26303440583379	Z
Sha_C9093858	101	4.2	6.8	3.4594316186373	Z
Sha_C9093880	101	4.1	16	4.32912359629157	Z
Sha_C9094144	101	2	1.8	1.92599941855622	Z
Sha_C9094170	101	1.9	10	3.57288966842058	Z
Sha_C9094176	101	2.4	7	3.23266075679027	Z
Sha_C9094244	101	2.1	3.7	2.53605290024021	Z
Sha_C9094254	101	2.2	4.6	2.76553474636298	Z
Sha_C9094330	101	1.7	3.1	2.26303440583379	Z
Sha_C9094334	101	6.3	9.5	3.98185265328974	Z
Sha_C9094404	101	2.6	8.9	3.52356195605701	Z
Sha_C9094434	101	3	8.1	3.47248777146274	Z
Sha_C9094454	101	1.9	4.7	2.72246602447109	Z
Sha_C9094502	101	2.9	4.7	2.92599941855622	Z
Sha_C9094544	101	3.6	5.6	3.20163386116965	Z
Sha_C9094554	101	1.8	4.9	2.74416109557041	Z
Sha_C9094578	101	1.9	2.8	2.23266075679027	Z
Sha_C9094662	101	3.9	5.5	3.23266075679027	Z
Sha_C9094772	101	1.9	3.6	2.4594316186373	Z
Sha_C9094788	101	3.2	4.4	2.92599941855622	Z
Sha_C9094896	101	2.9	3.4	2.65535182861255	Z
Sha_C9094956	101	3.8	8.4	3.60880924267552	Z
Sha_C9094976	101	1.9	1.6	1.8073549220576	Z
Sha_C9095000	101	4.6	7	3.53605290024021	Z
Sha_C9095008	101	2.4	6.9	3.21723071622067	Z
Sha_C9095058	101	3.8	13	4.0703893278914	Z
Sha_C9095162	102	2.3	8.3	3.40599235967584	Z
Sha_C9095172	102	2.6	2.8	2.43295940727611	Z
Sha_C9095226	102	1.5	9.3	3.43295940727611	Z
Sha_C9095280	102	1.5	4.5	2.58496250072116	Z
Sha_C9095318	102	3.2	9.1	3.62058641045188	Z
Sha_C9095340	102	4	4	3	Z
Sha_C9095364	102	4.9	14	4.24031432933371	Z
Sha_C9095368	102	3	13	4	Z
Sha_C9095466	102	5.1	6.2	3.49825086752783	Z
Sha_C9095490	102	2	3.2	2.37851162325373	Z
Sha_C9095530	102	1.6	2.8	2.13750352374994	Z
Sha_C9095542	102	2.8	9.4	3.60880924267552	Z
Sha_C9095548	102	1.7	4.3	2.58496250072116	Z
Sha_C9095566	102	3	4.8	2.96347412397489	Z
Sha_C9095578	102	3	5.5	3.08746284125034	Z
Sha_C9095632	102	1.7	4.8	2.70043971814109	Z
Sha_C9095732	102	4.1	8.4	3.64385618977472	Z
Sha_C9095756	102	7.3	13	4.34340782229781	Z
Sha_C9095758	102	4.2	16	4.33628338786443	Z
Sha_C9095812	102	2.5	3.3	2.53605290024021	Z
Sha_C9095918	102	4.7	6.1	3.43295940727611	Z
Sha_C9095928	102	1.5	6.2	2.94485844580754	Z
Sha_C9095942	102	2.6	2.2	2.26303440583379	Z
Sha_C9095998	102	1.6	5.9	2.90689059560852	Z
Sha_C9096002	102	5.2	12	4.10433665981474	Z
Sha_C9096060	102	1.6	5.7	2.86789646399265	Z
Sha_C9096100	102	4.6	7.5	3.59693514238723	Z
Sha_C9096116	102	1.4	7.2	3.10433665981474	Z
Sha_C9096136	102	5	10	3.90689059560852	Z
Sha_C9096146	102	3.6	3.4	2.8073549220576	Z
Sha_C9096160	102	1.8	5.6	2.88752527074159	Z
Sha_C9096234	102	2.2	7.5	3.27798474729977	Z
Sha_C9096260	102	1.9	5.6	2.90689059560852	Z
Sha_C9096400	102	4.6	4.1	3.12101540096137	Z
Sha_C9096438	102	2.6	5	2.92599941855622	Z
Sha_C9096510	102	2.9	3	2.56071495447448	Z
Sha_C9096588	102	5.5	7.6	3.71149490665009	Z
Sha_C9096614	102	3.9	9.7	3.76553474636298	Z
Sha_C9096664	102	5.6	9.5	3.91647664443772	Z
Sha_C9096730	102	2	1.6	1.84799690655495	Z
Sha_C9096762	102	2.7	8.4	3.47248777146274	Z
Sha_C9096772	102	4.9	6.2	3.47248777146274	Z
Sha_C9096782	102	4.1	3.8	2.98185265328974	Z
Sha_C9096904	102	1.7	1.8	1.8073549220576	Z
Sha_C9096996	102	4.3	11	3.93545974780529	Z
Sha_C9097054	102	2	6.3	3.05311133645956	Z
Sha_C9097062	102	6.5	9.5	4	Z
Sha_C9097158	102	1.5	5.3	2.76553474636298	Z
Sha_C9097170	102	1.9	7	3.15380533607904	Z
Sha_C9097182	102	2.6	4.5	2.82781902461732	Z
Sha_C9097222	102	1.8	4.6	2.67807190511264	Z
Sha_C9097254	102	2.5	14	4.04439411935845	Z
Sha_C9097304	102	3.3	9.1	3.63226821549951	Z
Sha_C9097360	102	3.2	15	4.18586654531133	Z
Sha_C9097460	102	1.8	7.3	3.18586654531133	Z
Sha_C9097598	102	4.7	9.5	3.82781902461732	Z
Sha_C9097636	102	2	4.7	2.74416109557041	Z
Sha_C9097670	102	1.9	8	3.30742852519225	Z
Sha_C9097694	102	4.2	16	4.33628338786443	Z
Sha_C9097696	102	1.7	2.7	2.13750352374994	Z
Sha_C9097704	102	1.9	6.4	3.05311133645956	Z
Sha_C9097742	102	3.5	8.8	3.62058641045188	Z
Sha_C9097758	102	1.7	4.6	2.65535182861255	Z
Sha_C9097762	102	2	2.9	2.29278174922785	Z
Sha_C9097820	102	1.6	4	2.48542682717024	Z
Sha_C9097824	102	5.5	3.7	3.20163386116965	Z
Sha_C9097862	102	3.5	6.5	3.32192809488736	Z
Sha_C9097864	102	1.6	3.1	2.23266075679027	Z
Sha_C9097892	102	4.4	11	3.94485844580754	Z
Sha_C9097990	102	2.7	6.9	3.26303440583379	Z
Sha_C9098214	102	1.3	2.2	1.8073549220576	Z
Sha_C9098230	102	1.9	12	3.79701297783614	Z
Sha_C9098560	102	1.9	6.7	3.10433665981474	Z
Sha_C9098576	102	1.9	3.3	2.37851162325373	Z
Sha_C9098590	102	1.8	4.9	2.74416109557041	Z
Sha_C9098780	102	1.9	6	2.98185265328974	Z
Sha_C9098786	102	2.2	2.8	2.32192809488736	Z
Sha_C9098826	102	2	1.8	1.92599941855622	Z
Sha_C9098848	102	1.7	3.4	2.35049724708413	Z
Sha_C9098894	102	5.2	14	4.26303440583379	Z
Sha_C9098936	102	1.8	2.2	2	Z
Sha_C9098942	102	1.6	12	3.76553474636298	Z
Sha_C9098954	102	5.3	8	3.73335434061383	Z
Sha_C9098962	102	4.2	11	3.92599941855622	Z
Sha_C9098982	102	1.8	6.8	3.10433665981474	Z
Sha_C9099002	102	7.1	10	4.09592441999854	Z
Sha_C9099140	102	2.4	5.9	3.05311133645956	Z
Sha_C9099176	102	1.7	5.7	2.88752527074159	Z
Sha_C9099184	102	2	8.5	3.39231742277876	Z
Sha_C9099334	102	6	10	4	Z
Sha_C9099372	102	3.7	12	3.97269265400426	Z
Sha_C9099462	102	2.8	7.4	3.35049724708413	Z
Sha_C9099464	102	4.1	9.9	3.8073549220576	Z
Sha_C9099478	102	2	6	3	Z
Sha_C9099480	102	4.5	11	3.95419631038688	Z
Sha_C9099516	102	1.5	3.8	2.40599235967584	Z
Sha_C9099530	102	4	12	4	Z
Sha_C9099544	102	1.6	6.7	3.05311133645956	Z
Sha_C9099558	102	3.8	5.6	3.23266075679027	Z
Sha_C9099564	102	2.7	2.8	2.4594316186373	Z
Sha_C9099608	102	2.8	12	3.88752527074159	Z
Sha_C9099634	102	4.2	2.3	2.70043971814109	Z
Sha_C9099646	102	2.6	9.6	3.60880924267552	Z
Sha_C9099672	102	1.9	4.1	2.58496250072116	Z
Sha_C9099720	102	5.7	9.9	3.96347412397489	Z
Sha_C9099764	102	1.9	6.3	3.03562390973072	Z
Sha_C9099880	102	1.4	3.9	2.40599235967584	Z
Sha_C9099890	102	2	2	2	Z
Sha_C9099908	102	2.2	5.6	2.96347412397489	Z
Sha_C9099916	102	4.2	6.7	3.44625622988956	Z
Sha_C9099996	102	1.3	5.4	2.74416109557041	Z
Sha_C9100008	102	2.5	2.5	2.32192809488736	Z
Sha_C9100112	102	1.9	6.4	3.05311133645956	Z
Sha_C9100136	102	2	5	2.8073549220576	Z
Sha_C9100202	102	1.8	2	1.92599941855622	Z
Sha_C9100292	102	4.2	7.1	3.49825086752783	Z
Sha_C9100380	102	2.3	6.7	3.16992500144231	Z
Sha_C9100402	102	2.1	8.7	3.43295940727611	Z
Sha_C9100516	102	2.5	9.4	3.57288966842058	Z
Sha_C9100532	102	2.2	6.7	3.15380533607904	Z
Sha_C9100540	102	4.5	11	3.95419631038688	Z
Sha_C9100582	102	4.4	9.9	3.83794324189103	Z
Sha_C9100600	102	4.9	12	4.07895134139482	Z
Sha_C9100604	102	4	4.8	3.13750352374994	Z
Sha_C9100628	102	4.9	14	4.24031432933371	Z
Sha_C9100630	102	2.8	11	3.78659636189081	Z
Sha_C9100698	102	3	11	3.8073549220576	Z
Sha_C9100838	102	2.4	9.3	3.54843662469604	Z
Sha_C9100900	102	2.9	2.6	2.4594316186373	Z
Sha_C9100944	102	2.8	8.3	3.47248777146274	Z
Sha_C9101072	102	2.9	9.7	3.65535182861255	Z
Sha_C9101094	102	2	5.4	2.88752527074159	Z
Sha_C9101202	102	2.7	5.1	2.96347412397489	Z
Sha_C9101326	102	1.4	12	3.74416109557041	Z
Sha_C9101464	102	2.4	8.6	3.4594316186373	Z
Sha_C9101492	102	1.5	7.4	3.15380533607904	Z
Sha_C9101526	102	2.6	9.4	3.58496250072116	Z
Sha_C9101572	102	2.8	11	3.78659636189081	Z
Sha_C9101680	102	2.6	5.5	3.01792190799726	Z
Sha_C9101690	102	2.3	2.3	2.20163386116965	Z
Sha_C9101734	102	2.5	5.6	3.01792190799726	Z
Sha_C9101878	102	2.4	4.3	2.74416109557041	Z
Sha_C9101942	102	2.5	12	3.85798099512757	Z
Sha_C9101984	102	2.9	14	4.07895134139482	Z
Sha_C9102036	102	1.9	9.9	3.56071495447448	Z
Sha_C9102076	102	3.1	5.6	3.12101540096137	Z
Sha_C9102090	102	3.7	17	4.37155886261196	Z
Sha_C9102104	102	2.3	8.2	3.39231742277876	Z
Sha_C9102128	102	1.4	3.1	2.16992500144231	Z
Sha_C9102216	102	2.2	12	3.82781902461732	Z
Sha_C9102222	102	1.8	4	2.53605290024021	Z
Sha_C9102270	102	1.9	5.2	2.82781902461732	Z
Sha_C9102328	102	1.7	6.5	3.03562390973072	Z
Sha_C9102340	102	1.9	7	3.15380533607904	Z
Sha_C9102352	102	5.4	8.7	3.81762325751143	Z
Sha_C9102420	102	1.5	4.7	2.63226821549951	Z
Sha_C9102466	102	1.8	2.7	2.16992500144231	Z
Sha_C9102534	102	1.7	8.4	3.33628338786443	Z
Sha_C9102620	102	3.4	3.6	2.8073549220576	Z
Sha_C9102640	102	2.8	7.2	3.32192809488736	Z
Sha_C9102734	102	2.3	6.2	3.08746284125034	Z
Sha_C9102736	102	2.1	7.4	3.24792751344359	Z
Sha_C9102842	102	1.3	10	3.49825086752783	Z
Sha_C9102950	102	5.4	11	4.03562390973072	Z
Sha_C9102978	102	3.5	6.8	3.36457243229586	Z
Sha_C9102980	102	2.8	3.6	2.67807190511264	Z
Sha_C9102988	102	1.7	17	4.22496636500027	Z
Sha_C9103016	102	1.8	6.6	3.0703893278914	Z
Sha_C9103068	102	4.7	10	3.877744249949	Z
Sha_C9103124	102	3	8.2	3.48542682717024	Z
Sha_C9103138	102	1.6	9.9	3.52356195605701	Z
Sha_C9103180	102	1.8	5.9	2.94485844580754	Z
Sha_C9103252	102	2.8	5.5	3.05311133645956	Z
Sha_C9103294	102	3.6	15	4.21723071622067	Z
Sha_C9103470	102	2	7	3.16992500144231	Z
Sha_C9103586	102	1.9	4.2	2.60880924267552	Z
Sha_C9103598	102	1.4	1.9	1.72246602447109	Z
Sha_C9103678	102	4.3	6.2	3.39231742277876	Z
Sha_C9103710	102	4.3	10	3.83794324189103	Z
Sha_C9103816	102	2.4	3.2	2.48542682717024	Z
Sha_C9103894	102	3.1	6.6	3.27798474729977	Z
Sha_C9103958	102	4	10	3.8073549220576	Z
Sha_C9104034	102	1.8	11	3.67807190511264	Z
Sha_C9104066	102	1.8	8.2	3.32192809488736	Z
Sha_C9104084	102	2.7	17	4.30012372456901	Z
Sha_C9104104	102	2.6	7.9	3.39231742277876	Z
Sha_C9104110	102	1.8	4.9	2.74416109557041	Z
Sha_C9104122	102	1.7	9.6	3.49825086752783	Z
Sha_C9104246	102	3.6	6.4	3.32192809488736	Z
Sha_C9104304	102	1.5	13	3.85798099512757	Z
Sha_C9104334	102	4.3	9.4	3.77610398807316	Z
Sha_C9104442	102	1.8	4.7	2.70043971814109	Z
Sha_C9104458	102	1.9	3.7	2.48542682717024	Z
Sha_C9104470	102	2	10	3.58496250072116	Z
Sha_C9104516	102	3.8	5.6	3.23266075679027	Z
Sha_C9104524	102	3.5	4.3	2.96347412397489	Z
Sha_C9104544	102	2.1	7.6	3.27798474729977	Z
Sha_C9104562	102	1.7	5.6	2.86789646399265	Z
Sha_C9104580	102	2.6	9.9	3.64385618977472	Z
Sha_C9104640	102	3	2.6	2.48542682717024	Z
Sha_C9104696	102	1.6	12	3.76553474636298	Z
Sha_C9104706	102	2	6.8	3.13750352374994	Z
Sha_C9104716	102	1.6	4.1	2.51096191927738	Z
Sha_C9104718	102	2.2	7.1	3.21723071622067	Z
Sha_C9104724	102	1.8	6.1	2.98185265328974	Z
Sha_C9104782	102	6.2	13	4.26303440583379	Z
Sha_C9104926	102	3.5	7.5	3.4594316186373	Z
Sha_C9104960	102	3.8	12	3.98185265328974	Z
Sha_C9105006	102	3.1	11	3.81762325751143	Z
Sha_C9105108	102	2.8	1.9	2.23266075679027	Z
Sha_C9105146	102	2.6	7.3	3.30742852519225	Z
Sha_C9105180	102	4	16	4.32192809488736	Z
Sha_C9105328	102	4.4	13	4.12101540096137	Z
Sha_C9105430	102	2.3	7.2	3.24792751344359	Z
Sha_C9105446	102	4.1	2.1	2.63226821549951	Z
Sha_C9105464	102	3.4	7	3.37851162325373	Z
Sha_C9105478	102	4.7	12	4.06177619758669	Z
Sha_C9105486	102	3.9	13	4.07895134139482	Z
Sha_C9105534	102	2.8	3.7	2.70043971814109	Z
Sha_C9105622	102	3.4	8.3	3.54843662469604	Z
Sha_C9105712	102	1.9	5.2	2.82781902461732	Z
Sha_C9105766	102	1.9	10	3.57288966842058	Z
Sha_C9105870	102	1.9	12	3.79701297783614	Z
Sha_C9105902	102	2.5	3.9	2.67807190511264	Z
Sha_C9105932	102	2.8	7.5	3.36457243229586	Z
Sha_C9105994	102	1.8	2.6	2.13750352374994	Z
Sha_C9106020	102	6.7	8.4	3.91647664443772	Z
Sha_C9106028	102	1.8	7.1	3.15380533607904	Z
Sha_C9106082	102	2.5	4.5	2.8073549220576	Z
Sha_C9106146	102	2.2	4.3	2.70043971814109	Z
Sha_C9106156	102	4.5	9.7	3.82781902461732	Z
Sha_C9106176	102	2.5	4.2	2.74416109557041	Z
Sha_C9106200	102	1.6	5.1	2.74416109557041	Z
Sha_C9106204	102	1.6	2.5	2.03562390973072	Z
Sha_C9106226	102	2.8	3.2	2.58496250072116	Z
Sha_C9106370	103	4.6	9.7	3.83794324189103	Z
Sha_C9106394	103	1.6	8.9	3.39231742277876	Z
Sha_C9106444	103	2.1	4.1	2.63226821549951	Z
Sha_C9106488	103	2.6	7.4	3.32192809488736	Z
Sha_C9106492	103	2	4.8	2.76553474636298	Z
Sha_C9106542	103	2	4.9	2.78659636189081	Z
Sha_C9106558	103	4.2	6.2	3.37851162325373	Z
Sha_C9106574	103	1.5	2.8	2.10433665981474	Z
Sha_C9106576	103	1.5	8.6	3.33628338786443	Z
Sha_C9106642	103	2.6	7.3	3.30742852519225	Z
Sha_C9106734	103	1.9	8.3	3.35049724708413	Z
Sha_C9106740	103	3.1	7	3.33628338786443	Z
Sha_C9106830	103	1.5	3.2	2.23266075679027	Z
Sha_C9106910	103	1.9	1.9	1.92599941855622	Z
Sha_C9106984	103	4.8	11	3.98185265328974	Z
Sha_C9107010	103	2	8	3.32192809488736	Z
Sha_C9107072	103	4	7.3	3.49825086752783	Z
Sha_C9107086	103	3	8.3	3.49825086752783	Z
Sha_C9107156	103	4.3	5.6	3.30742852519225	Z
Sha_C9107228	103	2.4	13	3.94485844580754	Z
Sha_C9107230	103	3.6	15	4.21723071622067	Z
Sha_C9107350	103	3.7	7.7	3.51096191927738	Z
Sha_C9107386	103	1.6	6.1	2.94485844580754	Z
Sha_C9107440	103	1.9	1.9	1.92599941855622	Z
Sha_C9107442	103	2.7	3.4	2.60880924267552	Z
Sha_C9107502	103	1.7	3.6	2.40599235967584	Z
Sha_C9107658	103	2.6	3.1	2.51096191927738	Z
Sha_C9107720	103	1.9	8.1	3.32192809488736	Z
Sha_C9107756	103	3.3	8.6	3.57288966842058	Z
Sha_C9107808	103	1.8	4.4	2.63226821549951	Z
Sha_C9107812	103	2	8.8	3.43295940727611	Z
Sha_C9107942	103	8.9	11	4.31469652565629	Z
Sha_C9107978	103	3.5	5.9	3.23266075679027	Z
Sha_C9108044	103	1.5	6.5	3	Z
Sha_C9108084	103	2	3.1	2.35049724708413	Z
Sha_C9108166	103	1.7	3.5	2.37851162325373	Z
Sha_C9108224	103	1.6	4.8	2.67807190511264	Z
Sha_C9108400	103	1.6	5.8	2.88752527074159	Z
Sha_C9108420	103	2.4	3	2.43295940727611	Z
Sha_C9108436	103	3.1	9.9	3.70043971814109	Z
Sha_C9108462	103	3.6	8	3.53605290024021	Z
Sha_C9108508	103	1.4	4.9	2.65535182861255	Z
Sha_C9108582	103	2	12	3.8073549220576	Z
Sha_C9108688	103	4.3	15	4.27052894238072	Z
Sha_C9108784	103	7.8	13	4.37851162325373	Z
Sha_C9108842	103	2	11	3.70043971814109	Z
Sha_C9108872	103	2.7	5.6	3.05311133645956	Z
Sha_C9108934	103	4.7	11	3.97269265400426	Z
Sha_C9108940	103	3.6	6.2	3.29278174922785	Z
Sha_C9108994	103	2.5	13	3.95419631038688	Z
Sha_C9108998	103	2.6	12	3.86789646399265	Z
Sha_C9109048	103	3.8	1.8	2.48542682717024	Z
Sha_C9109102	103	2.6	9.9	3.64385618977472	Z
Sha_C9109104	103	5.1	4.5	3.26303440583379	Z
Sha_C9109130	103	1.6	2.9	2.16992500144231	Z
Sha_C9109144	103	1.8	5.3	2.82781902461732	Z
Sha_C9109154	103	3.3	7.4	3.41953889151378	Z
Sha_C9109290	103	2.6	6.1	3.12101540096137	Z
Sha_C9109482	103	1.5	9.8	3.49825086752783	Z
Sha_C9109522	103	4.5	11	3.95419631038688	Z
Sha_C9109528	103	2.4	7.9	3.36457243229586	Z
Sha_C9109574	103	5.4	11	4.03562390973072	Z
Sha_C9109778	103	2.2	7.5	3.27798474729977	Z
Sha_C9109786	103	1.4	6.3	2.94485844580754	Z
Sha_C9109818	103	1.6	1.8	1.76553474636298	Z
Sha_C9109884	103	4.7	9.7	3.84799690655495	Z
Sha_C9109906	103	4.6	4.7	3.21723071622067	Z
Sha_C9109940	103	4.3	12	4.02680005934372	Z
Sha_C9110006	103	3.9	9.3	3.72246602447109	Z
Sha_C9110058	103	3.6	7.2	3.43295940727611	Z
Sha_C9110072	103	2.8	5.1	2.98185265328974	Z
Sha_C9110096	103	6.3	8.7	3.90689059560852	Z
Sha_C9110156	103	3	4.6	2.92599941855622	Z
Sha_C9110296	103	1.9	5.3	2.84799690655495	Z
Sha_C9110510	103	1.9	3.4	2.40599235967584	Z
Sha_C9110612	103	2.7	9.1	3.56071495447448	Z
Sha_C9110622	103	3	2.7	2.51096191927738	Z
Sha_C9110626	103	3.3	6.4	3.27798474729977	Z
Sha_C9110640	103	4.3	12	4.02680005934372	Z
Sha_C9110712	103	2.2	5.5	2.94485844580754	Z
Sha_C9110738	103	3.1	2.7	2.53605290024021	Z
Sha_C9110756	103	2.8	11	3.78659636189081	Z
Sha_C9110758	103	4.3	5.5	3.29278174922785	Z
Sha_C9110770	103	2.5	1.7	2.0703893278914	Z
Sha_C9110808	103	2.3	6.5	3.13750352374994	Z
Sha_C9110822	103	1.7	5.5	2.84799690655495	Z
Sha_C9110872	103	5	11	4	Z
Sha_C9111048	103	2.8	5.8	3.10433665981474	Z
Sha_C9111052	103	1.6	2.9	2.16992500144231	Z
Sha_C9111078	103	2	11	3.70043971814109	Z
Sha_C9111080	103	1.5	4	2.4594316186373	Z
Sha_C9111086	103	5.3	8.1	3.74416109557041	Z
Sha_C9111182	103	4.1	6.8	3.44625622988956	Z
Sha_C9111228	103	2.2	4.9	2.82781902461732	Z
Sha_C9111250	103	1.9	2	1.96347412397489	Z
Sha_C9111254	103	1.4	7.6	3.16992500144231	Z
Sha_C9111274	103	1.9	1.8	1.88752527074159	Z
Sha_C9111330	103	2	4.9	2.78659636189081	Z
Sha_C9111346	103	1.7	13	3.877744249949	Z
Sha_C9111348	103	3.4	6.7	3.33628338786443	Z
Sha_C9111412	103	3.1	12	3.91647664443772	Z
Sha_C9111458	103	3.5	4.5	3	Z
Sha_C9111490	103	1.6	3.2	2.26303440583379	Z
Sha_C9111494	103	3.2	8.9	3.59693514238723	Z
Sha_C9111502	103	2.7	10	3.6667565918848	Z
Sha_C9111724	103	1.8	2.9	2.23266075679027	Z
Sha_C9111890	103	4.9	8.2	3.71149490665009	Z
Sha_C9111930	103	3.8	12	3.98185265328974	Z
Sha_C9111942	103	3.1	5.2	3.05311133645956	Z
Sha_C9111978	103	5.5	15	4.35755200461808	Z
Sha_C9111998	103	1.7	3.4	2.35049724708413	Z
Sha_C9112058	103	5.4	5.1	3.39231742277876	Z
Sha_C9112064	103	1.6	5.5	2.82781902461732	Z
Sha_C9112076	103	1.4	12	3.74416109557041	Z
Sha_C9112120	103	3.4	7.7	3.47248777146274	Z
Sha_C9112182	103	2	4.7	2.74416109557041	Z
Sha_C9112260	103	4.2	12	4.01792190799726	Z
Sha_C9112272	103	1.5	7.3	3.13750352374994	Z
Sha_C9112274	103	3.1	6.3	3.23266075679027	Z
Sha_C9112300	103	2.9	12	3.8972404255748	Z
Sha_C9112404	103	2.9	6.7	3.26303440583379	Z
Sha_C9112458	103	3.1	12	3.91647664443772	Z
Sha_C9112496	103	1.6	5.1	2.74416109557041	Z
Sha_C9112558	103	4	8.2	3.60880924267552	Z
Sha_C9112758	103	6.9	12	4.24031432933371	Z
Sha_C9112760	103	6	13	4.24792751344359	Z
Sha_C9112874	103	1.8	3.8	2.48542682717024	Z
Sha_C9112924	103	2.8	9	3.56071495447448	Z
Sha_C9112944	103	2.8	13	3.98185265328974	Z
Sha_C9112960	103	3	5.6	3.10433665981474	Z
Sha_C9113100	103	3.9	6.2	3.33628338786443	Z
Sha_C9113118	103	6.2	6.1	3.62058641045188	Z
Sha_C9113140	103	3.1	6.6	3.27798474729977	Z
Sha_C9113168	103	2.3	11	3.73335434061383	Z
Sha_C9113174	103	3	7.1	3.33628338786443	Z
Sha_C9113188	103	2.6	10	3.65535182861255	Z
Sha_C9113190	103	1.6	8.6	3.35049724708413	Z
Sha_C9113222	103	2	2.6	2.20163386116965	Z
Sha_C9113254	103	3.5	6.6	3.33628338786443	Z
Sha_C9113266	103	2.8	6.8	3.26303440583379	Z
Sha_C9113354	103	2.9	2.6	2.4594316186373	Z
Sha_C9113360	103	6.1	13	4.25550073314839	Z
Sha_C9113374	103	2.4	5.9	3.05311133645956	Z
Sha_C9113404	103	3.4	3.9	2.86789646399265	Z
Sha_C9113486	103	1.4	5.5	2.78659636189081	Z
Sha_C9113558	103	1.6	5.2	2.76553474636298	Z
Sha_C9113628	103	1.8	4.1	2.56071495447448	Z
Sha_C9113636	103	2.6	14	4.05311133645956	Z
Sha_C9113710	103	2.7	9.8	3.64385618977472	Z
Sha_C9113724	103	2.5	4.3	2.76553474636298	Z
Sha_C9113752	103	2.6	14	4.05311133645956	Z
Sha_C9113766	103	3.5	7.2	3.41953889151378	Z
Sha_C9113930	103	3.1	10	3.71149490665009	Z
Sha_C9114010	103	3	10	3.70043971814109	Z
Sha_C9114026	103	6.2	10	4.01792190799726	Z
Sha_C9114056	103	3.8	2	2.53605290024021	Z
Sha_C9114230	103	5.6	10	3.96347412397489	Z
Sha_C9114334	103	2.5	7.7	3.35049724708413	Z
Sha_C9114354	103	6.9	11	4.16188768237689	Z
Sha_C9114404	103	5.6	8.8	3.84799690655495	Z
Sha_C9114416	103	2.3	9.2	3.52356195605701	Z
Sha_C9114528	103	5.1	14	4.25550073314839	Z
Sha_C9114536	103	5.2	8.3	3.75488750216347	Z
Sha_C9114606	103	1.9	4.2	2.60880924267552	Z
Sha_C9114670	103	2.1	4.1	2.63226821549951	Z
Sha_C9114706	103	4.4	8.6	3.70043971814109	Z
Sha_C9114710	103	5.6	11	4.05311133645956	Z
Sha_C9114764	103	4.1	12	4.00898878322726	Z
Sha_C9114766	103	5	11	4	Z
Sha_C9114844	103	2.4	4.8	2.84799690655495	Z
Sha_C9114852	103	4	6.3	3.36457243229586	Z
Sha_C9114854	103	1.8	2.8	2.20163386116965	Z
Sha_C9114904	103	3.1	6.5	3.26303440583379	Z
Sha_C9114940	103	2.3	3.7	2.58496250072116	Z
Sha_C9114994	103	5	3.7	3.12101540096137	Z
Sha_C9115022	103	2.4	10	3.63226821549951	Z
Sha_C9115098	103	3.4	13	4.03562390973072	Z
Sha_C9115232	103	3.1	15	4.17791779219584	Z
Sha_C9115234	103	3.4	11	3.84799690655495	Z
Sha_C9115292	103	4.1	5.4	3.24792751344359	Z
Sha_C9115320	103	2.6	4.4	2.8073549220576	Z
Sha_C9115332	103	3.9	8.2	3.59693514238723	Z
Sha_C9115376	103	3.4	4.1	2.90689059560852	Z
Sha_C9115404	103	3.9	8.1	3.58496250072116	Z
Sha_C9115412	103	4.6	5.9	3.39231742277876	Z
Sha_C9115508	103	4.4	11	3.94485844580754	Z
Sha_C9115526	103	2.9	6.9	3.29278174922785	Z
Sha_C9115538	103	4.6	2	2.72246602447109	Z
Sha_C9115562	103	2.2	7.4	3.26303440583379	Z
Sha_C9115600	103	1.7	4.9	2.72246602447109	Z
Sha_C9115742	103	5.8	4.1	3.30742852519225	Z
Sha_C9115782	103	1.3	7.3	3.10433665981474	Z
Sha_C9115796	103	1.5	7.9	3.23266075679027	Z
Sha_C9115964	103	2.6	4.8	2.88752527074159	Z
Sha_C9116030	103	6.4	12	4.20163386116965	Z
Sha_C9116050	103	1.5	1.5	1.58496250072116	Z
Sha_C9116102	103	3.5	7	3.39231742277876	Z
Sha_C9116114	103	1.8	8.6	3.37851162325373	Z
Sha_C9116134	103	4.8	6.5	3.49825086752783	Z
Sha_C9116174	103	2.1	5.5	2.92599941855622	Z
Sha_C9116276	103	2.8	13	3.98185265328974	Z
Sha_C9116340	103	6	10	4	Z
Sha_C9116376	103	1.7	4.6	2.65535182861255	Z
Sha_C9116382	103	3.7	14	4.14567745519564	Z
Sha_C9116492	103	3.5	12	3.95419631038688	Z
Sha_C9116502	103	3.3	2.3	2.48542682717024	Z
Sha_C9116534	103	1.8	11	3.67807190511264	Z
Sha_C9116660	103	2.5	5.5	3	Z
Sha_C9116676	103	3	7.4	3.37851162325373	Z
Sha_C9116690	103	2.9	6.7	3.26303440583379	Z
Sha_C9116824	103	3.3	14	4.11270013274936	Z
Sha_C9116894	103	2	2.4	2.13750352374994	Z
Sha_C9116996	103	2.8	2.8	2.48542682717024	Z
Sha_C9117036	103	1.8	6.1	2.98185265328974	Z
Sha_C9117124	103	1.5	2.9	2.13750352374994	Z
Sha_C9117146	103	5.5	15	4.35755200461808	Z
Sha_C9117194	103	1.4	9.6	3.4594316186373	Z
Sha_C9117228	103	2	1.4	1.76553474636298	Z
Sha_C9117252	103	1.7	5.5	2.84799690655495	Z
Sha_C9117262	103	2	4.3	2.65535182861255	Z
Sha_C9117308	104	4.1	4.7	3.13750352374994	Z
Sha_C9117360	104	3.9	11	3.8972404255748	Z
Sha_C9117400	104	3.8	9.6	3.74416109557041	Z
Sha_C9117486	104	4.2	9.6	3.78659636189081	Z
Sha_C9117502	104	5.3	11	4.02680005934372	Z
Sha_C9117558	104	2.5	14	4.04439411935845	Z
Sha_C9117594	104	3.9	11	3.8972404255748	Z
Sha_C9117660	104	3.6	10	3.76553474636298	Z
Sha_C9117662	104	2.8	5.4	3.03562390973072	Z
Sha_C9117698	104	4.9	10	3.8972404255748	Z
Sha_C9117794	104	2.5	4.3	2.76553474636298	Z
Sha_C9117802	104	6.4	14	4.35049724708413	Z
Sha_C9117808	104	3.3	8.7	3.58496250072116	Z
Sha_C9117850	104	3.1	5.7	3.13750352374994	Z
Sha_C9117858	104	7.4	11	4.20163386116965	Z
Sha_C9117928	104	1.8	1.9	1.88752527074159	Z
Sha_C9117968	104	4.7	12	4.06177619758669	Z
Sha_C9118002	104	4.8	9.8	3.86789646399265	Z
Sha_C9118018	104	3.6	15	4.21723071622067	Z
Sha_C9118034	104	3.5	13	4.04439411935845	Z
Sha_C9118048	104	1.6	6.4	3	Z
Sha_C9118066	104	5	12	4.08746284125034	Z
Sha_C9118074	104	2.6	7.6	3.35049724708413	Z
Sha_C9118076	104	1.9	1.6	1.8073549220576	Z
Sha_C9118146	104	3.5	7.3	3.43295940727611	Z
Sha_C9118154	104	1.9	3.8	2.51096191927738	Z
Sha_C9118188	104	1.9	6.8	3.12101540096137	Z
Sha_C9118202	104	3.1	14	4.09592441999854	Z
Sha_C9118224	104	1.5	2.8	2.10433665981474	Z
Sha_C9118262	104	1.9	18	4.31469652565629	Z
Sha_C9118300	104	4.8	8.4	3.72246602447109	Z
Sha_C9118328	104	2	4	2.58496250072116	Z
Sha_C9118342	104	4	11	3.90689059560852	Z
Sha_C9118392	104	1.6	7	3.10433665981474	Z
Sha_C9118444	104	2.5	3	2.4594316186373	Z
Sha_C9118450	104	3.5	8.2	3.54843662469604	Z
Sha_C9118478	104	2.4	9.9	3.62058641045188	Z
Sha_C9118592	104	2.5	11	3.75488750216347	Z
Sha_C9118886	104	1.7	4.3	2.58496250072116	Z
Sha_C9119224	104	3.1	9.1	3.60880924267552	Z
Sha_C9119232	104	5.3	9.8	3.91647664443772	Z
Sha_C9119234	104	1.8	5.5	2.86789646399265	Z
Sha_C9119308	104	2.7	3.5	2.63226821549951	Z
Sha_C9119316	104	2.6	8.2	3.43295940727611	Z
Sha_C9119382	104	4.9	3.5	3.0703893278914	Z
Sha_C9119412	104	3.4	11	3.84799690655495	Z
Sha_C9119428	104	4.8	16	4.37851162325373	Z
Sha_C9119440	104	4.3	9.6	3.79701297783614	Z
Sha_C9119450	104	5.5	12	4.12928301694497	Z
Sha_C9119532	104	3.5	9.7	3.72246602447109	Z
Sha_C9119538	104	1.6	3.5	2.35049724708413	Z
Sha_C9119604	104	1.9	1.9	1.92599941855622	Z
Sha_C9119668	104	1.9	3.4	2.40599235967584	Z
Sha_C9119730	104	1.9	4	2.56071495447448	Z
Sha_C9119750	104	5.7	12	4.14567745519564	Z
Sha_C9119766	104	1.6	5	2.72246602447109	Z
Sha_C9119818	104	1.8	7.8	3.26303440583379	Z
Sha_C9119888	104	2	4.6	2.72246602447109	Z
Sha_C9119938	104	2.3	5.4	2.94485844580754	Z
Sha_C9119966	104	2.9	8.5	3.51096191927738	Z
Sha_C9119980	104	4.9	12	4.07895134139482	Z
Sha_C9119988	104	2.6	6.7	3.21723071622067	Z
Sha_C9119990	104	3.8	6.7	3.39231742277876	Z
Sha_C9120154	104	2	3.1	2.35049724708413	Z
Sha_C9120262	104	4.7	11	3.97269265400426	Z
Sha_C9120330	104	1.9	3.6	2.4594316186373	Z
Sha_C9120396	104	1.5	4.6	2.60880924267552	Z
Sha_C9120452	104	2.6	7.7	3.36457243229586	Z
Sha_C9120476	104	4.5	15	4.28540221886225	Z
Sha_C9120542	104	2.9	2.2	2.35049724708413	Z
Sha_C9120544	104	3.3	9.7	3.70043971814109	Z
Sha_C9120642	104	1.9	4.6	2.70043971814109	Z
Sha_C9120720	104	3.4	4.6	3	Z
Sha_C9120738	104	1.9	5.6	2.90689059560852	Z
Sha_C9120778	104	2.9	5.9	3.13750352374994	Z
Sha_C9120896	104	2.1	4	2.60880924267552	Z
Sha_C9120938	104	2.7	6.4	3.18586654531133	Z
Sha_C9120972	104	3	4.9	2.98185265328974	Z
Sha_C9120990	104	2.3	5.7	3	Z
Sha_C9120996	104	1.9	7.9	3.29278174922785	Z
Sha_C9121168	104	4.8	10	3.88752527074159	Z
Sha_C9121240	104	1.4	3.2	2.20163386116965	Z
Sha_C9121258	104	2.4	12	3.84799690655495	Z
Sha_C9121354	104	4	8.4	3.63226821549951	Z
Sha_C9121402	104	4.3	11	3.93545974780529	Z
Sha_C9121464	104	2	11	3.70043971814109	Z
Sha_C9121542	104	3.8	3.7	2.90689059560852	Z
Sha_C9121544	104	1.6	6.1	2.94485844580754	Z
Sha_C9121568	104	1.9	6.8	3.12101540096137	Z
Sha_C9121598	104	2	7.3	3.21723071622067	Z
Sha_C9121600	104	2.3	7	3.21723071622067	Z
Sha_C9121680	104	2.7	6.2	3.15380533607904	Z
Sha_C9121688	104	3	4.6	2.92599941855622	Z
Sha_C9121692	104	2.6	6.1	3.12101540096137	Z
Sha_C9121728	104	2.8	6.5	3.21723071622067	Z
Sha_C9121734	104	2.6	4.4	2.8073549220576	Z
Sha_C9121764	104	3.6	17	4.36457243229586	Z
Sha_C9121776	104	3.1	12	3.91647664443772	Z
Sha_C9121834	104	3.7	5.2	3.15380533607904	Z
Sha_C9121932	104	2	3	2.32192809488736	Z
Sha_C9121934	104	6.4	4.2	3.40599235967584	Z
Sha_C9121976	104	1.9	3.2	2.35049724708413	Z
Sha_C9121990	104	3	13	4	Z
Sha_C9122028	104	1.7	4.9	2.72246602447109	Z
Sha_C9122118	104	1.7	4.1	2.53605290024021	Z
Sha_C9122254	104	3.2	7.3	3.39231742277876	Z
Sha_C9122274	104	3.4	11	3.84799690655495	Z
Sha_C9122280	104	2	3	2.32192809488736	Z
Sha_C9122326	104	7.6	9	4.05311133645956	Z
Sha_C9122328	104	2.7	6.4	3.18586654531133	Z
Sha_C9122332	104	2.7	8.6	3.49825086752783	Z
Sha_C9122336	104	1.4	2.3	1.88752527074159	Z
Sha_C9122460	104	4.2	11	3.92599941855622	Z
Sha_C9122462	104	1.2	4.2	2.43295940727611	Z
Sha_C9122472	104	1.5	8	3.24792751344359	Z
Sha_C9122476	104	4	17	4.39231742277876	Z
Sha_C9122480	104	2.5	1.9	2.13750352374994	Z
Sha_C9122548	104	2.6	13	3.96347412397489	Z
Sha_C9122626	104	2.4	2	2.13750352374994	Z
Sha_C9122670	104	2.8	5.5	3.05311133645956	Z
Sha_C9122698	104	3.8	9.1	3.68929916053589	Z
Sha_C9122718	104	1.9	9.7	3.53605290024021	Z
Sha_C9122726	104	2.4	8.1	3.39231742277876	Z
Sha_C9122814	104	6.2	9	3.92599941855622	Z
Sha_C9122862	104	3.3	6.5	3.29278174922785	Z
Sha_C9122884	104	2.4	14	4.03562390973072	Z
Sha_C9122918	104	1.6	6.9	3.08746284125034	Z
Sha_C9122960	104	1.7	5.5	2.84799690655495	Z
Sha_C9122996	104	4.8	12	4.0703893278914	Z
Sha_C9123006	104	2	3	2.32192809488736	Z
Sha_C9123012	104	2.5	5.4	2.98185265328974	Z
Sha_C9123022	104	2	7.3	3.21723071622067	Z
Sha_C9123048	104	2.4	6.8	3.20163386116965	Z
Sha_C9123054	104	2.4	4.9	2.86789646399265	Z
Sha_C9123072	104	5.3	7.8	3.71149490665009	Z
Sha_C9123104	104	6.6	12	4.21723071622067	Z
Sha_C9123238	104	5.5	14	4.28540221886225	Z
Sha_C9123388	104	2.3	9.9	3.60880924267552	Z
Sha_C9123406	104	3	6.3	3.21723071622067	Z
Sha_C9123412	104	3.8	6	3.29278174922785	Z
Sha_C9123418	104	2	6.2	3.03562390973072	Z
Sha_C9123440	104	2.1	10	3.59693514238723	Z
Sha_C9123504	104	1.9	4.5	2.67807190511264	Z
Sha_C9123540	104	2.6	7.4	3.32192809488736	Z
Sha_C9123628	104	2.8	7.9	3.41953889151378	Z
Sha_C9123658	104	2.2	14	4.01792190799726	Z
Sha_C9123670	104	2.2	12	3.82781902461732	Z
Sha_C9123716	104	5.1	15	4.32912359629157	Z
Sha_C9123848	104	1.5	9.6	3.47248777146274	Z
Sha_C9123888	104	3.8	7.5	3.49825086752783	Z
Sha_C9123914	104	4.3	7.9	3.60880924267552	Z
Sha_C9124068	104	4.4	15	4.27798474729977	Z
Sha_C9124072	104	3.2	9.2	3.63226821549951	Z
Sha_C9124144	104	2.2	8.5	3.41953889151378	Z
Sha_C9124156	104	3.5	7	3.39231742277876	Z
Sha_C9124230	104	6.6	14	4.36457243229586	Z
Sha_C9124242	104	2.8	4.2	2.8073549220576	Z
Sha_C9124314	104	5.9	13	4.24031432933371	Z
Sha_C9124360	104	1.9	1.7	1.84799690655495	Z
Sha_C9124368	104	4.2	7.1	3.49825086752783	Z
Sha_C9124432	104	3.4	13	4.03562390973072	Z
Sha_C9124444	104	3.3	14	4.11270013274936	Z
Sha_C9124638	104	2	6.3	3.05311133645956	Z
Sha_C9124678	104	3.7	4	2.94485844580754	Z
Sha_C9124774	104	5.3	8	3.73335434061383	Z
Sha_C9124778	104	4.7	12	4.06177619758669	Z
Sha_C9124822	104	1.7	4.2	2.56071495447448	Z
Sha_C9124850	104	1.9	3	2.29278174922785	Z
Sha_C9124942	104	3.1	8.8	3.57288966842058	Z
Sha_C9124962	104	1.9	6	2.98185265328974	Z
Sha_C9124972	104	6.2	12	4.18586654531133	Z
Sha_C9125040	104	1.7	3.7	2.43295940727611	Z
Sha_C9125056	104	2.9	9.6	3.64385618977472	Z
Sha_C9125148	104	2.6	1.9	2.16992500144231	Z
Sha_C9125174	104	2.6	6.7	3.21723071622067	Z
Sha_C9125200	104	2	3.8	2.53605290024021	Z
Sha_C9125260	104	4.6	4.9	3.24792751344359	Z
Sha_C9125290	104	3.8	11	3.88752527074159	Z
Sha_C9125336	104	1.9	1.5	1.76553474636298	Z
Sha_C9125356	104	1.7	2.6	2.10433665981474	Z
Sha_C9125408	104	3.3	5	3.05311133645956	Z
Sha_C9125642	104	2.4	5.9	3.05311133645956	Z
Sha_C9125822	104	2.9	14	4.07895134139482	Z
Sha_C9125910	104	2.5	8	3.39231742277876	Z
Sha_C9125972	104	2	13	3.90689059560852	Z
Sha_C9125984	104	2.7	14	4.06177619758669	Z
Sha_C9126204	104	1.5	11	3.64385618977472	Z
Sha_C9126386	104	1.3	6.8	3.01792190799726	Z
Sha_C9126414	104	3	5.9	3.15380533607904	Z
Sha_C9126424	104	4.1	11	3.91647664443772	Z
Sha_C9126524	104	1.6	8.2	3.29278174922785	Z
Sha_C9126556	104	3.3	15	4.19377174339668	Z
Sha_C9126684	104	1.5	4.4	2.56071495447448	Z
Sha_C9126698	104	3.7	7.9	3.53605290024021	Z
Sha_C9126712	104	2.5	5.5	3	Z
Sha_C9126778	104	2.2	3	2.37851162325373	Z
Sha_C9126806	104	2	1.9	1.96347412397489	Z
Sha_C9126826	104	2.7	6.9	3.26303440583379	Z
Sha_C9126920	104	2.6	9.8	3.63226821549951	Z
Sha_C9126988	104	2	4.4	2.67807190511264	Z
Sha_C9127008	104	2.4	5	2.88752527074159	Z
Sha_C9127022	104	4.3	10	3.83794324189103	Z
Sha_C9127070	104	6.3	9.5	3.98185265328974	Z
Sha_C9127096	104	2.6	5.4	3	Z
Sha_C9127106	104	5	6.5	3.52356195605701	Z
Sha_C9127146	104	3.3	6.1	3.23266075679027	Z
Sha_C9127164	104	4.8	6.2	3.4594316186373	Z
Sha_C9127192	104	5.2	7.8	3.70043971814109	Z
Sha_C9127218	104	1.5	1.8	1.72246602447109	Z
Sha_C9127228	104	2	3.7	2.51096191927738	Z
Sha_C9127250	104	1.8	4	2.53605290024021	Z
Sha_C9127372	104	3.7	5.4	3.18586654531133	Z
Sha_C9127384	104	1.8	8	3.29278174922785	Z
Sha_C9127492	104	1.9	7.4	3.21723071622067	Z
Sha_C9127508	104	3.2	11	3.82781902461732	Z
Sha_C9127552	104	5	6.9	3.57288966842058	Z
Sha_C9127582	104	3.2	10	3.72246602447109	Z
Sha_C9127586	104	6.3	6.1	3.63226821549951	Z
Sha_C9127646	104	7.4	12	4.27798474729977	Z
Sha_C9127690	104	3.6	10	3.76553474636298	Z
Sha_C9127716	104	2.4	6.4	3.13750352374994	Z
Sha_C9127726	104	1.8	2.5	2.10433665981474	Z
Sha_C9127728	104	2.6	6.2	3.13750352374994	Z
Sha_C9127838	104	2.9	7.8	3.41953889151378	Z
Sha_C9127840	104	3.9	8.1	3.58496250072116	Z
Sha_C9127942	104	2.4	11	3.74416109557041	Z
Sha_C9127948	104	1.2	12	3.72246602447109	Z
Sha_C9128066	104	3.7	7.2	3.44625622988956	Z
Sha_C9128076	104	1.9	4.9	2.76553474636298	Z
Sha_C9128100	104	2.5	3.7	2.63226821549951	Z
Sha_C9128132	104	3.7	7.6	3.49825086752783	Z
Sha_C9128136	104	4.3	6.5	3.43295940727611	Z
Sha_C9128198	105	6.5	12	4.20945336562895	Z
Sha_C9128204	105	1.8	5.7	2.90689059560852	Z
Sha_C9128216	105	6.8	5.2	3.58496250072116	Z
Sha_C9128228	105	2	2	2	Z
Sha_C9128238	105	2.9	4.2	2.82781902461732	Z
Sha_C9128242	105	1.9	6.7	3.10433665981474	Z
Sha_C9128252	105	3.8	5.4	3.20163386116965	Z
Sha_C9128332	105	4.2	13	4.10433665981474	Z
Sha_C9128358	105	4	9.5	3.75488750216347	Z
Sha_C9128404	105	3.6	17	4.36457243229586	Z
Sha_C9128412	105	2.8	7.6	3.37851162325373	Z
Sha_C9128466	105	1.5	3.5	2.32192809488736	Z
Sha_C9128594	105	2.1	16	4.17791779219584	Z
Sha_C9128630	105	1.7	4.1	2.53605290024021	Z
Sha_C9128658	105	1.6	5.5	2.82781902461732	Z
Sha_C9128680	105	1.4	11	3.63226821549951	Z
Sha_C9128768	105	2	1.5	1.8073549220576	Z
Sha_C9128780	105	2.9	11	3.79701297783614	Z
Sha_C9128796	105	1.9	4.1	2.58496250072116	Z
Sha_C9128810	105	5.6	8.7	3.83794324189103	Z
Sha_C9128822	105	4.1	7.1	3.48542682717024	Z
Sha_C9128834	105	2.4	6.5	3.15380533607904	Z
Sha_C9128854	105	4.4	15	4.27798474729977	Z
Sha_C9128918	105	1.7	3.5	2.37851162325373	Z
Sha_C9128922	105	3.1	13	4.00898878322726	Z
Sha_C9128932	105	2.7	6.8	3.24792751344359	Z
Sha_C9128970	105	4.3	14	4.19377174339668	Z
Sha_C9128976	105	1.7	8.2	3.30742852519225	Z
Sha_C9129020	105	1.5	3.5	2.32192809488736	Z
Sha_C9129038	105	2.5	12	3.85798099512757	Z
Sha_C9129046	105	1.1	6.5	2.92599941855622	Z
Sha_C9129052	105	1.9	2.3	2.0703893278914	Z
Sha_C9129094	105	6.9	11	4.16188768237689	Z
Sha_C9129116	105	2	4.2	2.63226821549951	Z
Sha_C9129224	105	3.2	5.5	3.12101540096137	Z
Sha_C9129244	105	2	7.9	3.30742852519225	Z
Sha_C9129302	105	2.7	5.1	2.96347412397489	Z
Sha_C9129384	105	3.3	4.1	2.88752527074159	Z
Sha_C9129450	105	2.5	5	2.90689059560852	Z
Sha_C9129502	105	1.6	2.9	2.16992500144231	Z
Sha_C9129612	105	1.9	6.2	3.01792190799726	Z
Sha_C9129636	105	5.1	10	3.91647664443772	Z
Sha_C9129676	105	2.6	5.7	3.05311133645956	Z
Sha_C9129784	105	2	3.5	2.4594316186373	Z
Sha_C9129790	105	2.5	7.7	3.35049724708413	Z
Sha_C9129816	105	2	4.3	2.65535182861255	Z
Sha_C9129840	105	1.8	3.6	2.43295940727611	Z
Sha_C9129848	105	4.6	10	3.86789646399265	Z
Sha_C9129874	105	3.5	8.9	3.63226821549951	Z
Sha_C9129930	105	2.1	15	4.09592441999854	Z
Sha_C9129970	105	2.7	4.8	2.90689059560852	Z
Sha_C9129990	105	3.2	13	4.01792190799726	Z
Sha_C9130040	105	2.8	8.1	3.44625622988956	Z
Sha_C9130136	105	2.6	11	3.76553474636298	Z
Sha_C9130154	105	2.9	6	3.15380533607904	Z
Sha_C9130198	105	3.6	8.7	3.62058641045188	Z
Sha_C9130286	105	3	4.9	2.98185265328974	Z
Sha_C9130346	105	3.4	5.5	3.15380533607904	Z
Sha_C9130356	105	4.2	11	3.92599941855622	Z
Sha_C9130390	105	4.2	11	3.92599941855622	Z
Sha_C9130460	105	1.7	4.8	2.70043971814109	Z
Sha_C9130574	105	2	2	2	Z
Sha_C9130632	105	2	5.9	2.98185265328974	Z
Sha_C9130670	105	7.5	13	4.35755200461808	Z
Sha_C9130744	105	2.9	6.7	3.26303440583379	Z
Sha_C9130746	105	3.6	5.7	3.21723071622067	Z
Sha_C9130946	105	2	4.9	2.78659636189081	Z
Sha_C9130968	105	2.5	8.9	3.51096191927738	Z
Sha_C9130980	105	1.5	3.1	2.20163386116965	Z
Sha_C9131004	105	4.5	6.9	3.51096191927738	Z
Sha_C9131014	105	6.6	9.6	4.01792190799726	Z
Sha_C9131038	105	1.9	2.1	2	Z
Sha_C9131058	105	1.8	4.9	2.74416109557041	Z
Sha_C9131090	105	1.9	6.8	3.12101540096137	Z
Sha_C9131164	105	2.5	8.2	3.41953889151378	Z
Sha_C9131260	105	2.6	7.3	3.30742852519225	Z
Sha_C9131264	105	2.8	8.4	3.48542682717024	Z
Sha_C9131300	105	3.6	9.9	3.75488750216347	Z
Sha_C9131304	105	1.8	3.6	2.43295940727611	Z
Sha_C9131340	105	3.7	4	2.94485844580754	Z
Sha_C9131348	105	2.5	7.2	3.27798474729977	Z
Sha_C9131350	105	1.6	2	1.84799690655495	Z
Sha_C9131364	105	3.4	6	3.23266075679027	Z
Sha_C9131392	105	2.5	8.7	3.48542682717024	Z
Sha_C9131400	105	2	13	3.90689059560852	Z
Sha_C9131402	105	4.1	14	4.17791779219584	Z
Sha_C9131426	105	3.6	14	4.13750352374993	Z
Sha_C9131438	105	4.1	6.9	3.4594316186373	Z
Sha_C9131460	105	1.9	4.7	2.72246602447109	Z
Sha_C9131484	105	2.8	2.6	2.43295940727611	Z
Sha_C9131506	105	4.1	8.9	3.70043971814109	Z
Sha_C9131548	105	1.9	4.1	2.58496250072116	Z
Sha_C9131590	105	1.9	7.3	3.20163386116965	Z
Sha_C9131602	105	6.6	6	3.65535182861255	Z
Sha_C9131614	105	2	3	2.32192809488736	Z
Sha_C9131622	105	2.6	1.8	2.13750352374994	Z
Sha_C9131688	105	1.8	7.9	3.27798474729977	Z
Sha_C9131690	105	4.3	10	3.83794324189103	Z
Sha_C9131840	105	2.7	3.4	2.60880924267552	Z
Sha_C9131844	105	2.2	8.2	3.37851162325373	Z
Sha_C9131886	105	1.9	14	3.99095486039699	Z
Sha_C9131910	105	3.2	7.6	3.43295940727611	Z
Sha_C9132088	105	1.6	4.1	2.51096191927738	Z
Sha_C9132090	105	2.1	14	4.00898878322726	Z
Sha_C9132100	105	3.6	7.8	3.51096191927738	Z
Sha_C9132102	105	2.9	8.3	3.48542682717024	Z
Sha_C9132112	105	3	8.5	3.52356195605701	Z
Sha_C9132148	105	2	4.3	2.65535182861255	Z
Sha_C9132162	105	1.6	3.8	2.43295940727611	Z
Sha_C9132196	105	2	8.5	3.39231742277876	Z
Sha_C9132238	105	3.9	6.2	3.33628338786443	Z
Sha_C9132360	105	3	6.6	3.26303440583379	Z
Sha_C9132368	105	4.1	12	4.00898878322726	Z
Sha_C9132376	105	3.5	11	3.85798099512757	Z
Sha_C9132378	105	1.6	3.9	2.4594316186373	Z
Sha_C9132442	105	1.7	3	2.23266075679027	Z
Sha_C9132490	105	3.5	6.7	3.35049724708413	Z
Sha_C9132500	105	4.3	13	4.11270013274936	Z
Sha_C9132520	105	4.3	8.6	3.68929916053589	Z
Sha_C9132550	105	2.6	12	3.86789646399265	Z
Sha_C9132560	105	3.9	16	4.31469652565629	Z
Sha_C9132638	105	5.6	11	4.05311133645956	Z
Sha_C9132666	105	2.2	6.9	3.18586654531133	Z
Sha_C9132742	105	3.8	6	3.29278174922785	Z
Sha_C9132782	105	3.8	12	3.98185265328974	Z
Sha_C9132800	105	3.5	5.4	3.15380533607904	Z
Sha_C9132808	105	1.8	10	3.56071495447448	Z
Sha_C9132810	105	3	3.6	2.72246602447109	Z
Sha_C9132814	105	2.4	8.6	3.4594316186373	Z
Sha_C9132852	105	4.2	8.2	3.63226821549951	Z
Sha_C9132932	105	6	15	4.39231742277876	Z
Sha_C9132976	105	1.2	6.7	2.98185265328974	Z
Sha_C9133042	105	3.2	12	3.92599941855622	Z
Sha_C9133144	105	3.1	11	3.81762325751143	Z
Sha_C9133162	105	2.8	10	3.67807190511264	Z
Sha_C9133264	105	1.8	2.7	2.16992500144231	Z
Sha_C9133274	105	2.1	6	3.01792190799726	Z
Sha_C9133278	105	6.4	14	4.35049724708413	Z
Sha_C9133344	105	3	5.1	3.01792190799726	Z
Sha_C9133362	105	2	5.5	2.90689059560852	Z
Sha_C9133364	105	4.1	6.3	3.37851162325373	Z
Sha_C9133388	105	2.2	6.2	3.0703893278914	Z
Sha_C9133448	105	3.7	9.8	3.75488750216347	Z
Sha_C9133450	105	1.8	3.8	2.48542682717024	Z
Sha_C9133552	105	2	1.9	1.96347412397489	Z
Sha_C9133560	105	1.4	5.4	2.76553474636298	Z
Sha_C9133562	105	1.7	4.1	2.53605290024021	Z
Sha_C9133584	105	2.9	11	3.79701297783614	Z
Sha_C9133672	105	5.9	13	4.24031432933371	Z
Sha_C9133686	105	3.8	12	3.98185265328974	Z
Sha_C9133690	105	4	5.1	3.18586654531133	Z
Sha_C9133694	105	3	8.3	3.49825086752783	Z
Sha_C9133740	105	1.5	5.7	2.84799690655495	Z
Sha_C9133810	105	1.9	8	3.30742852519225	Z
Sha_C9133874	105	1.3	2.8	2.03562390973072	Z
Sha_C9133920	105	1.8	4.2	2.58496250072116	Z
Sha_C9133946	105	1.8	4.1	2.56071495447448	Z
Sha_C9134004	105	1.6	3.6	2.37851162325373	Z
Sha_C9134060	105	3.8	11	3.88752527074159	Z
Sha_C9134062	105	2.9	12	3.8972404255748	Z
Sha_C9134144	105	2.8	5.7	3.08746284125034	Z
Sha_C9134164	105	2	5.2	2.84799690655495	Z
Sha_C9134234	105	4.8	6.6	3.51096191927738	Z
Sha_C9134256	105	1.9	6.6	3.08746284125034	Z
Sha_C9134264	105	1.9	3.7	2.48542682717024	Z
Sha_C9134372	105	3	13	4	Z
Sha_C9134378	105	3.2	9	3.60880924267552	Z
Sha_C9134380	105	2	5.4	2.88752527074159	Z
Sha_C9134388	105	1.9	9.5	3.51096191927738	Z
Sha_C9134394	105	7	7.3	3.83794324189103	Z
Sha_C9134484	105	2.3	12	3.83794324189103	Z
Sha_C9134586	105	2.9	6.5	3.23266075679027	Z
Sha_C9134600	105	3	9.7	3.6667565918848	Z
Sha_C9134634	105	3.6	6.2	3.29278174922785	Z
Sha_C9134638	105	2	3.5	2.4594316186373	Z
Sha_C9134648	105	3.1	6.9	3.32192809488736	Z
Sha_C9134658	105	3	7.4	3.37851162325373	Z
Sha_C9134716	105	1.5	4.2	2.51096191927738	Z
Sha_C9134730	105	1.8	4.3	2.60880924267552	Z
Sha_C9134792	105	3.1	1.8	2.29278174922785	Z
Sha_C9134870	105	2.4	9.6	3.58496250072116	Z
Sha_C9134880	105	2	2	2	Z
Sha_C9134898	105	1.6	6.4	3	Z
Sha_C9135048	105	1.9	6.1	3	Z
Sha_C9135096	105	3.4	13	4.03562390973072	Z
Sha_C9135132	105	1.9	2.5	2.13750352374994	Z
Sha_C9135156	105	4	8.5	3.64385618977472	Z
Sha_C9135174	105	2.1	7.9	3.32192809488736	Z
Sha_C9135252	105	2.3	2.8	2.35049724708413	Z
Sha_C9135280	105	4.2	11	3.92599941855622	Z
Sha_C9135358	105	2.5	5.8	3.05311133645956	Z
Sha_C9135418	105	2.9	4.6	2.90689059560852	Z
Sha_C9135476	105	1.9	6.3	3.03562390973072	Z
Sha_C9135496	105	2.5	5.7	3.03562390973072	Z
Sha_C9135512	105	1.6	2.8	2.13750352374994	Z
Sha_C9135524	105	1.7	5	2.74416109557041	Z
Sha_C9135548	105	2.2	4.3	2.70043971814109	Z
Sha_C9135602	105	3.1	7.1	3.35049724708413	Z
Sha_C9135608	105	1.5	7.2	3.12101540096137	Z
Sha_C9135710	105	1.7	3.6	2.40599235967584	Z
Sha_C9135742	105	1.7	2.7	2.13750352374994	Z
Sha_C9135744	105	3.4	11	3.84799690655495	Z
Sha_C9135754	105	4.3	9.4	3.77610398807316	Z
Sha_C9135822	105	5.9	9.1	3.90689059560852	Z
Sha_C9135958	105	2.3	7.9	3.35049724708413	Z
Sha_C9135966	105	3.4	12	3.94485844580754	Z
Sha_C9135984	105	2.2	7.1	3.21723071622067	Z
Sha_C9136064	105	3.5	8.2	3.54843662469604	Z
Sha_C9136066	105	7.1	9.1	4.01792190799726	Z
Sha_C9136078	105	5.3	13	4.19377174339668	Z
Sha_C9136086	105	1.5	4.4	2.56071495447448	Z
Sha_C9136146	105	3.2	4.1	2.86789646399265	Z
Sha_C9136204	105	1.3	17	4.19377174339668	Z
Sha_C9136252	105	3.3	6.3	3.26303440583379	Z
Sha_C9136386	105	3.9	15	4.24031432933371	Z
Sha_C9136400	105	1.2	4.3	2.4594316186373	Z
Sha_C9136424	105	4	9.6	3.76553474636298	Z
Sha_C9136474	105	2.4	9	3.51096191927738	Z
Sha_C9136532	105	1.9	3.1	2.32192809488736	Z
Sha_C9136544	105	1.9	4.2	2.60880924267552	Z
Sha_C9136600	105	3.4	2.7	2.60880924267552	Z
Sha_C9136658	105	1.9	3.6	2.4594316186373	Z
Sha_C9136708	105	4.2	6	3.35049724708413	Z
Sha_C9136770	105	3.1	7.9	3.4594316186373	Z
Sha_C9136778	105	3	7	3.32192809488736	Z
Sha_C9136848	105	2.4	4.6	2.8073549220576	Z
Sha_C9136922	105	4.5	5.9	3.37851162325373	Z
Sha_C9136930	105	1.9	4.5	2.67807190511264	Z
Sha_C9136934	105	2.9	4.3	2.84799690655495	Z
Sha_C9136984	105	4	12	4	Z
Sha_C9136986	105	1.7	8.2	3.30742852519225	Z
Sha_C9137032	105	2	6.8	3.13750352374994	Z
Sha_C9137044	105	1.8	7.9	3.27798474729977	Z
Sha_C9137114	105	3.8	6.6	3.37851162325373	Z
Sha_C9137152	105	2.9	8.4	3.49825086752783	Z
Sha_C9137300	105	1.3	3.9	2.37851162325373	Z
Sha_C9137320	105	4	13	4.08746284125034	Z
Sha_C9137390	105	2.5	13	3.95419631038688	Z
Sha_C9137410	105	2.6	7.8	3.37851162325373	Z
Sha_C9137474	105	5.5	14	4.28540221886225	Z
Sha_C9137514	105	2.9	12	3.8972404255748	Z
Sha_C9137524	105	1.8	2.8	2.20163386116965	Z
Sha_C9137532	105	1.9	2.7	2.20163386116965	Z
Sha_C9137554	105	1.8	4.3	2.60880924267552	Z
Sha_C9137618	105	4.2	16	4.33628338786443	Z
Sha_C9137718	105	4.7	7.6	3.62058641045188	Z
Sha_C9137734	105	2	13	3.90689059560852	Z
Sha_C9137800	105	1.8	7.9	3.27798474729977	Z
Sha_C9137808	105	4.9	9.1	3.8073549220576	Z
Sha_C9137820	105	1.9	8.5	3.37851162325373	Z
Sha_C9137930	105	3.4	8.2	3.53605290024021	Z
Sha_C9137934	105	3.6	4.5	3.01792190799726	Z
Sha_C9137960	105	1.9	4	2.56071495447448	Z
Sha_C9138070	105	2.2	5.3	2.90689059560852	Z
Sha_C9138096	105	4.1	6.1	3.35049724708413	Z
Sha_C9138124	105	3.1	15	4.17791779219584	Z
Sha_C9138168	105	2.9	16	4.24031432933371	Z
Sha_C9138248	105	4.9	8.5	3.74416109557041	Z
Sha_C9138264	105	2.8	6.9	3.27798474729977	Z
Sha_C9138310	105	4.6	15	4.29278174922785	Z
Sha_C9138334	105	6	5.6	3.53605290024021	Z
Sha_C9138354	105	2.5	2	2.16992500144231	Z
Sha_C9138464	105	3.6	10	3.76553474636298	Z
Sha_C9138498	105	1.5	5.5	2.8073549220576	Z
Sha_C9138584	105	1.7	2.5	2.0703893278914	Z
Sha_C9138604	105	2.8	1.2	2	Z
Sha_C9138648	105	2.2	5.7	2.98185265328974	Z
Sha_C9138652	105	2.5	8.3	3.43295940727611	Z
Sha_C9138776	105	3.3	6.3	3.26303440583379	Z
Sha_C9138778	105	1.8	8.1	3.30742852519225	Z
Sha_C9138798	105	2.4	11	3.74416109557041	Z
Sha_C9138848	105	2.6	7.8	3.37851162325373	Z
Sha_C9138938	105	4.6	6.6	3.48542682717024	Z
Sha_C9139048	105	5.2	13	4.18586654531133	Z
Sha_C9139074	105	1.6	5.8	2.88752527074159	Z
Sha_C9139114	105	2.9	6.7	3.26303440583379	Z
Sha_C9139186	105	2.7	2	2.23266075679027	Z
Sha_C9139216	105	1.6	3.2	2.26303440583379	Z
Sha_C9139224	105	1.7	4.3	2.58496250072116	Z
Sha_C9139240	105	2.4	4.5	2.78659636189081	Z
Sha_C9139262	105	6.3	14	4.34340782229781	Z
Sha_C9139268	105	5	13	4.16992500144231	Z
Sha_C9139312	105	5.9	7.9	3.78659636189081	Z
Sha_C9139372	105	1.8	1.4	1.67807190511264	Z
Sha_C9139374	105	5	10	3.90689059560852	Z
Sha_C9139392	105	4.6	11	3.96347412397489	Z
Sha_C9139418	105	2.1	7.2	3.21723071622067	Z
Sha_C9139440	105	3.9	12	3.99095486039699	Z
Sha_C9139468	105	3.4	4.3	2.94485844580754	Z
Sha_C9139494	105	4.2	9.5	3.77610398807316	Z
Sha_C9139504	105	2.8	3.4	2.63226821549951	Z
Sha_C9139506	105	1.6	4.7	2.65535182861255	Z
Sha_C9139544	105	1.6	4.8	2.67807190511264	Z
Sha_C9139646	106	5.2	9.4	3.86789646399265	Z
Sha_C9139648	106	1.7	2.6	2.10433665981474	Z
Sha_C9139706	106	3	8.7	3.54843662469604	Z
Sha_C9139710	106	3.7	12	3.97269265400426	Z
Sha_C9139728	106	2.3	6.4	3.12101540096137	Z
Sha_C9139884	106	2.7	12	3.877744249949	Z
Sha_C9139892	106	1.8	8.8	3.40599235967584	Z
Sha_C9139964	106	1.7	3	2.23266075679027	Z
Sha_C9139994	106	3	5.4	3.0703893278914	Z
Sha_C9140026	106	6.4	8.6	3.90689059560852	Z
Sha_C9140030	106	3.8	13	4.0703893278914	Z
Sha_C9140088	106	4.2	12	4.01792190799726	Z
Sha_C9140194	106	7.2	2.9	3.33628338786443	Z
Sha_C9140214	106	3.1	14	4.09592441999854	Z
Sha_C9140218	106	2	3.2	2.37851162325373	Z
Sha_C9140220	106	3.6	8.3	3.57288966842058	Z
Sha_C9140230	106	3.5	6.2	3.27798474729977	Z
Sha_C9140252	106	2.7	5.7	3.0703893278914	Z
Sha_C9140304	106	1.9	3.8	2.51096191927738	Z
Sha_C9140358	106	6.1	8.9	3.90689059560852	Z
Sha_C9140416	106	1.8	1.6	1.76553474636298	Z
Sha_C9140420	106	2	14	4	Z
Sha_C9140426	106	3.9	15	4.24031432933371	Z
Sha_C9140440	106	4.9	14	4.24031432933371	Z
Sha_C9140464	106	2.4	11	3.74416109557041	Z
Sha_C9140482	106	4.4	14	4.20163386116965	Z
Sha_C9140508	106	3	7.7	3.41953889151378	Z
Sha_C9140582	106	3.4	12	3.94485844580754	Z
Sha_C9140668	106	2.5	7.6	3.33628338786443	Z
Sha_C9140706	106	4.6	10	3.86789646399265	Z
Sha_C9140736	106	3.4	5.7	3.18586654531133	Z
Sha_C9140748	106	2.7	13	3.97269265400426	Z
Sha_C9140752	106	2.9	6.1	3.16992500144231	Z
Sha_C9140772	106	2	4.2	2.63226821549951	Z
Sha_C9140786	106	1.9	2	1.96347412397489	Z
Sha_C9140800	106	2.4	11	3.74416109557041	Z
Sha_C9140806	106	1.6	5.5	2.82781902461732	Z
Sha_C9140874	106	1.7	1.9	1.84799690655495	Z
Sha_C9140922	106	1.8	7.5	3.21723071622067	Z
Sha_C9140978	106	1.8	2.6	2.13750352374994	Z
Sha_C9140980	106	3.9	7.8	3.54843662469604	Z
Sha_C9140982	106	5.1	10	3.91647664443772	Z
Sha_C9140992	106	3.6	17	4.36457243229586	Z
Sha_C9141028	106	1.5	1.7	1.67807190511264	Z
Sha_C9141076	106	2	6.5	3.08746284125034	Z
Sha_C9141078	106	1.6	3.6	2.37851162325373	Z
Sha_C9141104	106	1.5	5.4	2.78659636189081	Z
Sha_C9141120	106	2.3	7.1	3.23266075679027	Z
Sha_C9141124	106	1.7	4.1	2.53605290024021	Z
Sha_C9141150	106	3	8.2	3.48542682717024	Z
Sha_C9141162	106	2.4	7.1	3.24792751344359	Z
Sha_C9141210	106	3.1	5.8	3.15380533607904	Z
Sha_C9141290	106	3.3	6.1	3.23266075679027	Z
Sha_C9141292	106	5.5	13	4.20945336562895	Z
Sha_C9141316	106	5.7	15	4.37155886261196	Z
Sha_C9141400	106	1.9	1.5	1.76553474636298	Z
Sha_C9141424	106	1.8	4.3	2.60880924267552	Z
Sha_C9141442	106	1.5	3	2.16992500144231	Z
Sha_C9141490	106	2.3	1.8	2.03562390973072	Z
Sha_C9141506	106	3.1	9.4	3.64385618977472	Z
Sha_C9141508	106	4.8	14	4.23266075679027	Z
Sha_C9141634	106	3.8	12	3.98185265328974	Z
Sha_C9141650	106	3.8	9.9	3.77610398807316	Z
Sha_C9141678	106	2.7	2.7	2.43295940727611	Z
Sha_C9141694	106	2.8	5.5	3.05311133645956	Z
Sha_C9141700	106	1.8	8.9	3.41953889151378	Z
Sha_C9141732	106	2	8.1	3.33628338786443	Z
Sha_C9141824	106	5.4	14	4.27798474729977	Z
Sha_C9141894	106	2.8	6.9	3.27798474729977	Z
Sha_C9141900	106	1.9	6.5	3.0703893278914	Z
Sha_C9141914	106	3.3	3	2.65535182861255	Z
Sha_C9141992	106	1.7	12	3.77610398807316	Z
Sha_C9142004	106	3.4	1.9	2.40599235967584	Z
Sha_C9142032	106	2.4	7.8	3.35049724708413	Z
Sha_C9142062	106	3.3	13	4.02680005934372	Z
Sha_C9142080	106	1.4	6.9	3.05311133645956	Z
Sha_C9142094	106	1.5	4.7	2.63226821549951	Z
Sha_C9142132	106	2.4	3.2	2.48542682717024	Z
Sha_C9142182	106	7.5	12	4.28540221886225	Z
Sha_C9142186	106	4.1	13	4.09592441999854	Z
Sha_C9142188	106	3.2	8.7	3.57288966842058	Z
Sha_C9142216	106	8	10	4.16992500144231	Z
Sha_C9142236	106	2.8	2	2.26303440583379	Z
Sha_C9142266	106	2.6	6.6	3.20163386116965	Z
Sha_C9142376	106	2.6	9.6	3.60880924267552	Z
Sha_C9142448	106	1.6	2.5	2.03562390973072	Z
Sha_C9142500	106	1.3	11	3.62058641045188	Z
Sha_C9142504	106	1.3	4.1	2.43295940727611	Z
Sha_C9142518	106	1.8	3	2.26303440583379	Z
Sha_C9142544	106	2.5	3.5	2.58496250072116	Z
Sha_C9142556	106	4.2	8.4	3.65535182861255	Z
Sha_C9142712	106	3.1	6.8	3.30742852519225	Z
Sha_C9142718	106	1.9	1.9	1.92599941855622	Z
Sha_C9142762	106	2.4	2.6	2.32192809488736	Z
Sha_C9142766	106	2.8	6.4	3.20163386116965	Z
Sha_C9142786	106	3.7	9.2	3.68929916053589	Z
Sha_C9142886	106	4.8	10	3.88752527074159	Z
Sha_C9142914	106	2.4	13	3.94485844580754	Z
Sha_C9142926	106	2.2	3	2.37851162325373	Z
Sha_C9142936	106	1.2	5.4	2.72246602447109	Z
Sha_C9142972	106	2	6	3	Z
Sha_C9142996	106	1.7	7.7	3.23266075679027	Z
Sha_C9143004	106	1.8	8.1	3.30742852519225	Z
Sha_C9143070	106	2.1	6.3	3.0703893278914	Z
Sha_C9143168	106	4.4	10	3.84799690655495	Z
Sha_C9143172	106	1.2	4.2	2.43295940727611	Z
Sha_C9143218	106	6.1	9.5	3.96347412397489	Z
Sha_C9143274	106	2	7.8	3.29278174922785	Z
Sha_C9143310	106	2.7	4.8	2.90689059560852	Z
Sha_C9143344	106	1.6	7.1	3.12101540096137	Z
Sha_C9143348	106	3.4	10	3.74416109557041	Z
Sha_C9143396	106	3.4	8.4	3.56071495447448	Z
Sha_C9143436	106	3.2	5.6	3.13750352374994	Z
Sha_C9143564	106	1.6	8.4	3.32192809488736	Z
Sha_C9143610	106	2.6	2.5	2.35049724708413	Z
Sha_C9143644	106	7.7	13	4.37155886261196	Z
Sha_C9143670	106	5	11	4	Z
Sha_C9143796	106	2.4	8.4	3.43295940727611	Z
Sha_C9143938	106	3.6	3.2	2.76553474636298	Z
Sha_C9143942	106	2	9.3	3.49825086752783	Z
Sha_C9144050	106	2.1	5.2	2.86789646399265	Z
Sha_C9144068	106	3.5	5.4	3.15380533607904	Z
Sha_C9144082	106	1.8	5.3	2.82781902461732	Z
Sha_C9144104	106	2	1.5	1.8073549220576	Z
Sha_C9144134	106	2.7	7.7	3.37851162325373	Z
Sha_C9144158	106	1.8	2	1.92599941855622	Z
Sha_C9144162	106	3.8	11	3.88752527074159	Z
Sha_C9144198	106	2.5	4.3	2.76553474636298	Z
Sha_C9144222	106	3.3	3.6	2.78659636189081	Z
Sha_C9144238	106	5.1	11	4.00898878322726	Z
Sha_C9144250	106	4.4	5.8	3.35049724708413	Z
Sha_C9144380	106	1.4	2	1.76553474636298	Z
Sha_C9144456	106	3.1	5.4	3.08746284125034	Z
Sha_C9144460	106	2.3	4.6	2.78659636189081	Z
Sha_C9144486	106	2.2	6.7	3.15380533607904	Z
Sha_C9144498	106	2.8	6.6	3.23266075679027	Z
Sha_C9144512	106	1.9	7.7	3.26303440583379	Z
Sha_C9144542	106	5.4	12	4.12101540096137	Z
Sha_C9144620	106	3.4	4.5	2.98185265328974	Z
Sha_C9144640	106	2.1	8	3.33628338786443	Z
Sha_C9144670	106	5	5.3	3.36457243229586	Z
Sha_C9144728	106	5	9.1	3.81762325751143	Z
Sha_C9144838	106	1.9	4.9	2.76553474636298	Z
Sha_C9144876	106	1.8	5.8	2.92599941855622	Z
Sha_C9144962	106	2.9	11	3.79701297783614	Z
Sha_C9144972	106	1.9	9.3	3.48542682717024	Z
Sha_C9145054	106	2	12	3.8073549220576	Z
Sha_C9145240	106	3.6	6	3.26303440583379	Z
Sha_C9145280	106	2.6	1.6	2.0703893278914	Z
Sha_C9145302	106	5.1	8	3.71149490665009	Z
Sha_C9145336	106	2.7	8.6	3.49825086752783	Z
Sha_C9145344	106	7.7	9.8	4.12928301694497	Z
Sha_C9145400	106	4.3	12	4.02680005934372	Z
Sha_C9145402	106	3.2	9.7	3.68929916053589	Z
Sha_C9145504	106	2.3	6.3	3.10433665981474	Z
Sha_C9145510	106	3.1	13	4.00898878322726	Z
Sha_C9145536	106	2.1	5.1	2.84799690655495	Z
Sha_C9145584	106	4.8	7.8	3.65535182861255	Z
Sha_C9145684	106	1.5	2	1.8073549220576	Z
Sha_C9145702	106	1.9	11	3.68929916053589	Z
Sha_C9145792	106	2.7	6.8	3.24792751344359	Z
Sha_C9145840	106	4.1	7.2	3.49825086752783	Z
Sha_C9145852	106	3.5	9.5	3.70043971814109	Z
Sha_C9145910	106	3.6	2.3	2.56071495447448	Z
Sha_C9145926	106	4.1	11	3.91647664443772	Z
Sha_C9145948	106	3.8	8.8	3.65535182861255	Z
Sha_C9145988	106	2.1	7.6	3.27798474729977	Z
Sha_C9146042	106	2.6	3.4	2.58496250072116	Z
Sha_C9146110	106	1.5	2.1	1.84799690655495	Z
Sha_C9146180	106	2.2	5.6	2.96347412397489	Z
Sha_C9146198	106	4.9	10	3.8972404255748	Z
Sha_C9146486	106	6.7	9	3.97269265400426	Z
Sha_C9146496	106	3.6	10	3.76553474636298	Z
Sha_C9146706	106	2.9	4.9	2.96347412397489	Z
Sha_C9146712	106	3.3	7.7	3.4594316186373	Z
Sha_C9146752	106	2.3	15	4.11270013274936	Z
Sha_C9146808	106	4	12	4	Z
Sha_C9146950	106	3	7.3	3.36457243229586	Z
Sha_C9147052	106	2.6	3.2	2.53605290024021	Z
Sha_C9147110	106	1.8	6.8	3.10433665981474	Z
Sha_C9147144	106	2.8	10	3.67807190511264	Z
Sha_C9147158	106	1.9	5.3	2.84799690655495	Z
Sha_C9147172	106	1.5	2.7	2.0703893278914	Z
Sha_C9147182	106	1.8	4.7	2.70043971814109	Z
Sha_C9147186	106	1.9	7.1	3.16992500144231	Z
Sha_C9147280	106	2.3	6.6	3.15380533607904	Z
Sha_C9147346	106	1.4	6.7	3.01792190799726	Z
Sha_C9147388	106	2	5.5	2.90689059560852	Z
Sha_C9147398	106	3.8	14	4.15380533607904	Z
Sha_C9147408	106	3.6	7.3	3.44625622988956	Z
Sha_C9147438	106	1.4	6	2.88752527074159	Z
Sha_C9147450	106	3.6	11	3.86789646399265	Z
Sha_C9147508	106	3.3	4.8	3.01792190799726	Z
Sha_C9147628	106	7	8.7	3.97269265400426	Z
Sha_C9147650	106	3	15	4.16992500144231	Z
Sha_C9147670	106	2.4	8.4	3.43295940727611	Z
Sha_C9147744	106	2.3	9.6	3.57288966842058	Z
Sha_C9147784	106	3.9	5	3.15380533607904	Z
Sha_C9147804	106	6.1	13	4.25550073314839	Z
Sha_C9147846	106	1.7	2.6	2.10433665981474	Z
Sha_C9147960	106	2.7	2.9	2.48542682717024	Z
Sha_C9148138	106	1.4	4.8	2.63226821549951	Z
Sha_C9148150	106	2.3	3.2	2.4594316186373	Z
Sha_C9148174	106	5.4	11	4.03562390973072	Z
Sha_C9148256	106	1.5	4.2	2.51096191927738	Z
Sha_C9148294	106	4.3	11	3.93545974780529	Z
Sha_C9148312	106	2	2	2	Z
Sha_C9148394	106	1.9	5.5	2.88752527074159	Z
Sha_C9148428	106	2	6.4	3.0703893278914	Z
Sha_C9148446	106	3.4	16	4.27798474729977	Z
Sha_C9148486	106	1.7	3.4	2.35049724708413	Z
Sha_C9148568	106	1.7	3.6	2.40599235967584	Z
Sha_C9148658	106	4.1	6.7	3.43295940727611	Z
Sha_C9148858	106	1.8	7.2	3.16992500144231	Z
Sha_C9148904	106	1.9	4.4	2.65535182861255	Z
Sha_C9148906	106	3.2	7.8	3.4594316186373	Z
Sha_C9148976	106	3.2	5.4	3.10433665981474	Z
Sha_C9149052	106	2.5	2.1	2.20163386116965	Z
Sha_C9149076	106	1.9	6.5	3.0703893278914	Z
Sha_C9149078	106	2.5	5.6	3.01792190799726	Z
Sha_C9149186	106	1.9	12	3.79701297783614	Z
Sha_C9149252	106	2.5	6.6	3.18586654531133	Z
Sha_C9149258	106	4.1	7.4	3.52356195605701	Z
Sha_C9149350	106	3.2	5.5	3.12101540096137	Z
Sha_C9149390	106	2.6	5.6	3.03562390973072	Z
Sha_C9149458	106	4.1	13	4.09592441999854	Z
Sha_C9149466	106	1.4	8.3	3.27798474729977	Z
Sha_C9149502	106	4.4	13	4.12101540096137	Z
Sha_C9149538	106	2	4	2.58496250072116	Z
Sha_C9149578	106	2.9	13	3.99095486039699	Z
Sha_C9149662	106	3	7.5	3.39231742277876	Z
Sha_C9149666	106	3.4	3.2	2.72246602447109	Z
Sha_C9149680	106	1.2	6.7	2.98185265328974	Z
Sha_C9149734	106	1.7	2.5	2.0703893278914	Z
Sha_C9149818	106	4.2	1.4	2.48542682717024	Z
Sha_C9149906	106	1.5	6.1	2.92599941855622	Z
Sha_C9149910	106	4.3	8.7	3.70043971814109	Z
Sha_C9149938	106	3.6	8.5	3.59693514238723	Z
Sha_C9150082	106	4	13	4.08746284125034	Z
Sha_C9150150	106	6.6	14	4.36457243229586	Z
Sha_C9150198	106	1.8	3.5	2.40599235967584	Z
Sha_C9150220	106	1.8	5	2.76553474636298	Z
Sha_C9150224	106	4.2	11	3.92599941855622	Z
Sha_C9150242	106	1.3	4	2.40599235967584	Z
Sha_C9150262	106	2.8	1.9	2.23266075679027	Z
Sha_C9150296	106	1.9	5	2.78659636189081	Z
Sha_C9150314	106	3.6	5.4	3.16992500144231	Z
Sha_C9150320	106	3.9	10	3.79701297783614	Z
Sha_C9150416	106	6.3	6.1	3.63226821549951	Z
Sha_C9150456	106	4.1	6.6	3.41953889151378	Z
Sha_C9150470	106	1.8	5.4	2.84799690655495	Z
Sha_C9150494	106	3.4	7.6	3.4594316186373	Z
Sha_C9150528	106	3.8	3.9	2.94485844580754	Z
Sha_C9150534	106	2.1	5.9	3	Z
Sha_C9150556	106	1.9	1.9	1.92599941855622	Z
Sha_C9150594	106	3.2	7.8	3.4594316186373	Z
Sha_C9150640	106	2	4.9	2.78659636189081	Z
Sha_C9150656	106	1.6	5.3	2.78659636189081	Z
Sha_C9150678	106	1.9	6.8	3.12101540096137	Z
Sha_C9150716	106	5.4	10	3.94485844580754	Z
Sha_C9150862	106	2.3	4	2.65535182861255	Z
Sha_C9150880	106	2.7	6.6	3.21723071622067	Z
Sha_C9150922	106	2.8	8.7	3.52356195605701	Z
Sha_C9150976	106	3.6	2.7	2.65535182861255	Z
Sha_C9150998	106	1.7	4.2	2.56071495447448	Z
Sha_C9151072	106	1.8	1.9	1.88752527074159	Z
Sha_C9151128	106	3.9	11	3.8972404255748	Z
Sha_C9151176	106	6.4	9.3	3.97269265400426	Z
Sha_C9151198	106	4.4	13	4.12101540096137	Z
Sha_C9151214	106	3.5	3.6	2.82781902461732	Z
Sha_C9151236	107	1.6	4.5	2.60880924267552	Z
Sha_C9151254	107	4.8	8.9	3.77610398807316	Z
Sha_C9151286	107	3.4	6.1	3.24792751344359	Z
Sha_C9151324	107	3.4	4.1	2.90689059560852	Z
Sha_C9151386	107	1.3	1.5	1.48542682717024	Z
Sha_C9151396	107	2	6.8	3.13750352374994	Z
Sha_C9151450	107	3.3	7.7	3.4594316186373	Z
Sha_C9151490	107	3.2	11	3.82781902461732	Z
Sha_C9151512	107	3.4	9.7	3.71149490665009	Z
Sha_C9151534	107	2	5	2.8073549220576	Z
Sha_C9151538	107	1.6	5.9	2.90689059560852	Z
Sha_C9151554	107	5.1	7.7	3.67807190511264	Z
Sha_C9151596	107	1.7	3.1	2.26303440583379	Z
Sha_C9151666	107	5.3	14	4.27052894238072	Z
Sha_C9151698	107	4.4	16	4.35049724708413	Z
Sha_C9151752	107	2.3	5.8	3.01792190799726	Z
Sha_C9151830	107	1.5	5.3	2.76553474636298	Z
Sha_C9151882	107	1.5	3.2	2.23266075679027	Z
Sha_C9151884	107	1.7	5.9	2.92599941855622	Z
Sha_C9151908	107	2.7	8.3	3.4594316186373	Z
Sha_C9151922	107	3.8	11	3.88752527074159	Z
Sha_C9151928	107	1.3	2.2	1.8073549220576	Z
Sha_C9151930	107	3.6	13	4.05311133645956	Z
Sha_C9152108	107	3	5.6	3.10433665981474	Z
Sha_C9152138	107	2.4	4.1	2.70043971814109	Z
Sha_C9152180	107	2.1	7	3.18586654531133	Z
Sha_C9152304	107	2.6	6.6	3.20163386116965	Z
Sha_C9152320	107	3.2	3.7	2.78659636189081	Z
Sha_C9152348	107	3.5	9.4	3.68929916053589	Z
Sha_C9152404	107	7.7	12	4.30012372456901	Z
Sha_C9152410	107	4.1	9.5	3.76553474636298	Z
Sha_C9152422	107	2	3.6	2.48542682717024	Z
Sha_C9152462	107	1.6	5.4	2.8073549220576	Z
Sha_C9152600	107	2.9	10	3.68929916053589	Z
Sha_C9152666	107	1.8	7.8	3.26303440583379	Z
Sha_C9152674	107	1.5	4.7	2.63226821549951	Z
Sha_C9152676	107	1.3	10	3.49825086752783	Z
Sha_C9152680	107	6.5	11	4.12928301694497	Z
Sha_C9152760	107	1.7	5.6	2.86789646399265	Z
Sha_C9152774	107	3.5	7.9	3.51096191927738	Z
Sha_C9152830	107	3.1	7.5	3.40599235967584	Z
Sha_C9152848	107	1.7	6.2	2.98185265328974	Z
Sha_C9152880	107	1.4	2.6	2	Z
Sha_C9152888	107	3.8	3.4	2.84799690655495	Z
Sha_C9152900	107	2	1.5	1.8073549220576	Z
Sha_C9152908	107	2.6	4.9	2.90689059560852	Z
Sha_C9152934	107	5	5.4	3.37851162325373	Z
Sha_C9153034	107	2.3	6.1	3.0703893278914	Z
Sha_C9153068	107	2.6	9.3	3.57288966842058	Z
Sha_C9153106	107	2	6	3	Z
Sha_C9153214	107	2.2	7.1	3.21723071622067	Z
Sha_C9153258	107	4	9.3	3.73335434061383	Z
Sha_C9153324	107	1.4	2.2	1.84799690655495	Z
Sha_C9153328	107	4	12	4	Z
Sha_C9153334	107	3.7	6.8	3.39231742277876	Z
Sha_C9153408	107	2.3	4.5	2.76553474636298	Z
Sha_C9153422	107	4.2	7.1	3.49825086752783	Z
Sha_C9153472	107	2.6	8.3	3.44625622988956	Z
Sha_C9153516	107	3.7	6.3	3.32192809488736	Z
Sha_C9153528	107	1.9	3.4	2.40599235967584	Z
Sha_C9153602	107	2.4	8.3	3.41953889151378	Z
Sha_C9153638	107	2	2.3	2.10433665981474	Z
Sha_C9153640	107	2.7	7.7	3.37851162325373	Z
Sha_C9153644	107	5.6	5.9	3.52356195605701	Z
Sha_C9153716	107	2.7	1.9	2.20163386116965	Z
Sha_C9153730	107	1.7	1.8	1.8073549220576	Z
Sha_C9153762	107	6.3	10	4.02680005934372	Z
Sha_C9153826	107	2.9	14	4.07895134139482	Z
Sha_C9153836	107	1.9	8.5	3.37851162325373	Z
Sha_C9153860	107	3.1	15	4.17791779219584	Z
Sha_C9153910	107	2.2	4.2	2.67807190511264	Z
Sha_C9153924	107	3	4.2	2.84799690655495	Z
Sha_C9153984	107	1.9	7.7	3.26303440583379	Z
Sha_C9154026	107	2.2	6.5	3.12101540096137	Z
Sha_C9154056	107	3.6	13	4.05311133645956	Z
Sha_C9154254	107	1.9	10	3.57288966842058	Z
Sha_C9154288	107	3.8	9.3	3.71149490665009	Z
Sha_C9154384	107	2.4	6.9	3.21723071622067	Z
Sha_C9154444	107	2.7	8.4	3.47248777146274	Z
Sha_C9154540	107	2.8	12	3.88752527074159	Z
Sha_C9154674	107	6.1	13	4.25550073314839	Z
Sha_C9154680	107	2.7	3	2.51096191927738	Z
Sha_C9154710	107	4.1	13	4.09592441999854	Z
Sha_C9154780	107	2.1	8.4	3.39231742277876	Z
Sha_C9154860	107	1.4	4.2	2.48542682717024	Z
Sha_C9154888	107	2.7	2.3	2.32192809488736	Z
Sha_C9154976	107	4.2	10	3.82781902461732	Z
Sha_C9154982	107	1.9	4.2	2.60880924267552	Z
Sha_C9154984	107	3.1	9.6	3.6667565918848	Z
Sha_C9155000	107	1.7	3.5	2.37851162325373	Z
Sha_C9155084	107	2.7	5	2.94485844580754	Z
Sha_C9155202	107	1.8	6	2.96347412397489	Z
Sha_C9155244	107	3.3	8.6	3.57288966842058	Z
Sha_C9155410	107	2.5	4.6	2.82781902461732	Z
Sha_C9155426	107	3	5.9	3.15380533607904	Z
Sha_C9155608	107	1.6	6.4	3	Z
Sha_C9155612	107	2.6	6.3	3.15380533607904	Z
Sha_C9155626	107	2.5	6.2	3.12101540096137	Z
Sha_C9155670	107	5.1	13	4.17791779219584	Z
Sha_C9155748	107	1.4	8.9	3.36457243229586	Z
Sha_C9155784	107	2.9	1.9	2.26303440583379	Z
Sha_C9155870	107	4.7	11	3.97269265400426	Z
Sha_C9155892	107	1.7	4.1	2.53605290024021	Z
Sha_C9155936	107	3.6	9.4	3.70043971814109	Z
Sha_C9155938	107	1.7	2.7	2.13750352374994	Z
Sha_C9155994	107	3.1	8.8	3.57288966842058	Z
Sha_C9156012	107	4.7	9.4	3.81762325751143	Z
Sha_C9156014	107	3.4	6.7	3.33628338786443	Z
Sha_C9156056	107	3.1	9.8	3.68929916053589	Z
Sha_C9156062	107	4.3	12	4.02680005934372	Z
Sha_C9156238	107	3.5	4.1	2.92599941855622	Z
Sha_C9156248	107	1.8	1.9	1.88752527074159	Z
Sha_C9156374	107	1.9	4.1	2.58496250072116	Z
Sha_C9156410	107	2.4	11	3.74416109557041	Z
Sha_C9156420	107	4.1	9.4	3.75488750216347	Z
Sha_C9156430	107	2.7	14	4.06177619758669	Z
[truncated: 28,785 more rows]
