# Supplementary material for: Evolution of gene dosage on the Z-chromosome of schistosome parasites
Source: eLife. 2018 Jul 25;7:e35684. doi: 10.7554/eLife.35684 (PMC6089595; doi:10.7554/eLife.35684)
Supplement: Figure 1—source data 4. [file elife-35684-fig1-data4.xlsx]

## Sheet: Figure 1-source data 4
Figure 1-source data 4: S. japonicum autosome vs Z-specific region assigment
Scaffold_ID_Sjap	Scaffold_Size_Sjap	Depth_40640_Sjap	Depth_40641_Sjap	FMratio_Sjap	log2FMcov_Sjap	flag_Sjap
SJC_S000108	296063	33	17	0.515151515151515	-0.956931278108114	Z
SJC_S000158	179731	34	18	0.529411764705882	-0.917537839808027	Z
SJC_S000164	168473	39	21	0.538461538461538	-0.893084796083488	Z
SJC_S000213	217068	38	17	0.447368421052632	-1.16046467219325	Z
SJC_S000231	149475	22	12	0.545454545454545	-0.874469117916141	Z
SJC_S000269	248397	35	17	0.485714285714286	-1.04182017569463	Z
SJC_S000410	74164	30	16	0.533333333333333	-0.906890595608519	Z
SJC_S000427	87293	36	18	0.5	-1	Z
SJC_S000438	93289	36	18	0.5	-1	Z
SJC_S000440	78376	36	18	0.5	-1	Z
SJC_S000441	101854	36	18	0.5	-1	Z
SJC_S000442	68749	37	19	0.513513513513513	-0.961525852185364	Z
SJC_S000444	35469	34	16	0.470588235294118	-1.08746284125034	Z
SJC_S000500	126336	34	17	0.5	-1	Z
SJC_S000505	163621	32	16	0.5	-1	Z
SJC_S000520	70875	41	20	0.48780487804878	-1.03562390973072	Z
SJC_S000565	147778	37	18	0.486486486486487	-1.03952836418664	Z
SJC_S000594	261777	34	16	0.470588235294118	-1.08746284125034	Z
SJC_S000598	89916	34	15	0.441176470588235	-1.18057224564182	Z
SJC_S000599	24896	42	22	0.523809523809524	-0.932885804141463	Z
SJC_S000602	53458	30	15	0.5	-1	Z
SJC_S000608	155270	32	15	0.46875	-1.09310940439148	Z
SJC_S000636	157675	34	17	0.5	-1	Z
SJC_S000647	77365	33	16	0.484848484848485	-1.04439411935845	Z
SJC_S000649	67362	36	19	0.527777777777778	-0.921997487998727	Z
SJC_S000651	61452	34	17	0.5	-1	Z
SJC_S000677	30355	46	24	0.521739130434783	-0.938599455335857	Z
SJC_S000678	48701	30	15	0.5	-1	Z
SJC_S000697	102625	37	15	0.405405405405405	-1.30256277002043	Z
SJC_S000698	111844	53	29	0.547169811320755	-0.869939459435627	Z
SJC_S000700	55936	31	15	0.483870967741935	-1.04730571477836	Z
SJC_S000721	118070	66	31	0.46969696969697	-1.09019780897158	Z
SJC_S000734	95029	36	17	0.472222222222222	-1.08246216019197	Z
SJC_S000739	73072	37	18	0.486486486486487	-1.03952836418664	Z
SJC_S000743	37863	36	16	0.444444444444444	-1.16992500144231	Z
SJC_S000746	67591	34	17	0.5	-1	Z
SJC_S000750	23556	33	14	0.424242424242424	-1.23703919730085	Z
SJC_S000754	209660	33	16	0.484848484848485	-1.04439411935845	Z
SJC_S000773	89136	34	18	0.529411764705882	-0.917537839808027	Z
SJC_S000779	52105	36	19	0.527777777777778	-0.921997487998727	Z
SJC_S000780	26663	30	15	0.5	-1	Z
SJC_S000781	103614	36	17	0.472222222222222	-1.08246216019197	Z
SJC_S000782	39432	34	16	0.470588235294118	-1.08746284125034	Z
SJC_S000783	114736	31	16	0.516129032258065	-0.954196310386875	Z
SJC_S000787	13874	36	17	0.472222222222222	-1.08246216019197	Z
SJC_S000807	184739	35	17	0.485714285714286	-1.04182017569463	Z
SJC_S000818	82918	100	33	0.33	-1.59946207041627	Z
SJC_S000858	87466	33	16	0.484848484848485	-1.04439411935845	Z
SJC_S000871	45320	32	16	0.5	-1	Z
SJC_S000877	27433	31	16	0.516129032258065	-0.954196310386875	Z
SJC_S000878	44359	35	17	0.485714285714286	-1.04182017569463	Z
SJC_S000879	41920	35	17	0.485714285714286	-1.04182017569463	Z
SJC_S000880	47459	35	16	0.457142857142857	-1.12928301694497	Z
SJC_S000886	42249	51	25	0.490196078431373	-1.02856915219677	Z
SJC_S000887	15942	36	17	0.472222222222222	-1.08246216019197	Z
SJC_S000888	17938	36	18	0.5	-1	Z
SJC_S000890	32953	36	18	0.5	-1	Z
SJC_S000891	56090	35	17	0.485714285714286	-1.04182017569463	Z
SJC_S000893	15759	34	16	0.470588235294118	-1.08746284125034	Z
SJC_S000895	12238	33	14	0.424242424242424	-1.23703919730085	Z
SJC_S000896	13639	33	16	0.484848484848485	-1.04439411935845	Z
SJC_S000897	43451	31	14	0.451612903225806	-1.14684138832927	Z
SJC_S000898	45768	35	15	0.428571428571429	-1.22239242133645	Z
SJC_S000929	31658	41	20	0.48780487804878	-1.03562390973072	Z
SJC_S000932	25021	32	15	0.46875	-1.09310940439148	Z
SJC_S000935	60234	32	15	0.46875	-1.09310940439148	Z
SJC_S000943	33831	35	17	0.485714285714286	-1.04182017569463	Z
SJC_S000944	56755	76	26	0.342105263157895	-1.54748779530249	Z
SJC_S000956	69402	33	17	0.515151515151515	-0.956931278108114	Z
SJC_S000995	40033	35	17	0.485714285714286	-1.04182017569463	Z
SJC_S001027	157483	63	35	0.555555555555556	-0.84799690655495	Z
SJC_S001045	37533	42	21	0.5	-1	Z
SJC_S001056	59240	35	17	0.485714285714286	-1.04182017569463	Z
SJC_S001068	40976	34	17	0.5	-1	Z
SJC_S001086	18504	38	18	0.473684210526316	-1.07800251200127	Z
SJC_S001100	9873	39	19	0.487179487179487	-1.03747470541866	Z
SJC_S001101	19101	37	18	0.486486486486487	-1.03952836418664	Z
SJC_S001113	40942	32	17	0.53125	-0.912537158749661	Z
SJC_S001114	28844	33	17	0.515151515151515	-0.956931278108114	Z
SJC_S001126	26111	33	18	0.545454545454545	-0.874469117916141	Z
SJC_S001141	17652	33	17	0.515151515151515	-0.956931278108114	Z
SJC_S001144	31984	35	19	0.542857142857143	-0.881355503501381	Z
SJC_S001148	16014	32	14	0.4375	-1.1926450779424	Z
SJC_S001151	101019	45	22	0.488888888888889	-1.03242147769238	Z
SJC_S001162	42157	57	28	0.491228070175439	-1.02553509210714	Z
SJC_S001176	38960	29	14	0.482758620689655	-1.05062607306997	Z
SJC_S001183	66777	37	19	0.513513513513513	-0.961525852185364	Z
SJC_S001187	68355	33	16	0.484848484848485	-1.04439411935845	Z
SJC_S001191	45019	35	17	0.485714285714286	-1.04182017569463	Z
SJC_S001196	36958	36	17	0.472222222222222	-1.08246216019197	Z
SJC_S001210	32997	34	16	0.470588235294118	-1.08746284125034	Z
SJC_S001216	28137	30	14	0.466666666666667	-1.09953567355091	Z
SJC_S001223	29923	37	19	0.513513513513513	-0.961525852185364	Z
SJC_S001227	22714	31	13	0.419354838709677	-1.25375659224578	Z
SJC_S001231	17092	31	16	0.516129032258065	-0.954196310386875	Z
SJC_S001237	9791	20	8.8	0.44	-1.18442457113743	Z
SJC_S001240	16923	33	16	0.484848484848485	-1.04439411935845	Z
SJC_S001278	46594	39	19	0.487179487179487	-1.03747470541866	Z
SJC_S001288	31838	46	24	0.521739130434783	-0.938599455335857	Z
SJC_S001290	28134	38	19	0.5	-1	Z
SJC_S001291	15571	40	19	0.475	-1.07400058144378	Z
SJC_S001321	99131	46	23	0.5	-1	Z
SJC_S001346	40414	34	17	0.5	-1	Z
SJC_S001359	22722	51	25	0.490196078431373	-1.02856915219677	Z
SJC_S001363	111548	33	17	0.515151515151515	-0.956931278108114	Z
SJC_S001382	31629	30	14	0.466666666666667	-1.09953567355091	Z
SJC_S001388	42085	37	17	0.459459459459459	-1.12199052437861	Z
SJC_S001390	34737	37	17	0.459459459459459	-1.12199052437861	Z
SJC_S001394	61049	36	17	0.472222222222222	-1.08246216019197	Z
SJC_S001396	37922	31	16	0.516129032258065	-0.954196310386875	Z
SJC_S001411	22264	34	15	0.441176470588235	-1.18057224564182	Z
SJC_S001412	41663	34	17	0.5	-1	Z
SJC_S001423	46855	31	16	0.516129032258065	-0.954196310386875	Z
SJC_S001431	26726	36	19	0.527777777777778	-0.921997487998727	Z
SJC_S001445	21571	31	15	0.483870967741935	-1.04730571477836	Z
SJC_S001447	10343	35	18	0.514285714285714	-0.959358015502654	Z
SJC_S001448	14366	45	24	0.533333333333333	-0.906890595608519	Z
SJC_S001449	46935	31	15	0.483870967741935	-1.04730571477836	Z
SJC_S001451	50456	36	18	0.5	-1	Z
SJC_S001459	11213	28	15	0.535714285714286	-0.900464326449086	Z
SJC_S001462	24340	35	17	0.485714285714286	-1.04182017569463	Z
SJC_S001464	15362	30	13	0.433333333333333	-1.20645087746743	Z
SJC_S001468	11183	32	15	0.46875	-1.09310940439148	Z
SJC_S001471	6807	37	15	0.405405405405405	-1.30256277002043	Z
SJC_S001479	30977	33	16	0.484848484848485	-1.04439411935845	Z
SJC_S001481	15166	15	1.5	0.1	-3.32192809488736	Z
SJC_S001485	31393	33	17	0.515151515151515	-0.956931278108114	Z
SJC_S001486	23221	34	17	0.5	-1	Z
SJC_S001488	23096	35	18	0.514285714285714	-0.959358015502654	Z
SJC_S001490	4980	36	15	0.416666666666667	-1.26303440583379	Z
SJC_S001492	32489	37	17	0.459459459459459	-1.12199052437861	Z
SJC_S001497	24072	46	21	0.456521739130435	-1.13124453327825	Z
SJC_S001502	6425	25	8.3	0.332	-1.59074485331516	Z
SJC_S001511	6953	29	12	0.413793103448276	-1.27301849440642	Z
SJC_S001513	36161	40	20	0.5	-1	Z
SJC_S001515	14367	33	16	0.484848484848485	-1.04439411935845	Z
SJC_S001516	17542	32	16	0.5	-1	Z
SJC_S001520	12947	29	12	0.413793103448276	-1.27301849440642	Z
SJC_S001531	18343	33	17	0.515151515151515	-0.956931278108114	Z
SJC_S001539	11605	30	15	0.5	-1	Z
SJC_S001543	15786	30	15	0.5	-1	Z
SJC_S001548	19397	34	15	0.441176470588235	-1.18057224564182	Z
SJC_S001551	4816	230	28	0.121739130434783	-3.03813512888677	Z
SJC_S001553	17205	35	17	0.485714285714286	-1.04182017569463	Z
SJC_S001555	24032	35	19	0.542857142857143	-0.881355503501381	Z
SJC_S001556	21026	34	16	0.470588235294118	-1.08746284125034	Z
SJC_S001558	51678	30	14	0.466666666666667	-1.09953567355091	Z
SJC_S001564	39616	39	19	0.487179487179487	-1.03747470541866	Z
SJC_S001573	59778	37	18	0.486486486486487	-1.03952836418664	Z
SJC_S001587	34774	31	16	0.516129032258065	-0.954196310386875	Z
SJC_S001588	121741	34	17	0.5	-1	Z
SJC_S001593	57105	34	16	0.470588235294118	-1.08746284125034	Z
SJC_S001606	48419	33	15	0.454545454545455	-1.13750352374993	Z
SJC_S001626	19797	36	18	0.5	-1	Z
SJC_S001631	34554	35	18	0.514285714285714	-0.959358015502654	Z
SJC_S001635	32993	43	23	0.534883720930233	-0.902702798645085	Z
SJC_S001639	16776	23	12	0.521739130434783	-0.938599455335857	Z
SJC_S001640	20067	32	14	0.4375	-1.1926450779424	Z
SJC_S001643	18354	27	15	0.555555555555556	-0.84799690655495	Z
SJC_S001644	22819	33	16	0.484848484848485	-1.04439411935845	Z
SJC_S001657	24815	29	15	0.517241379310345	-0.951090399519053	Z
SJC_S001664	7569	14	5.2	0.371428571428571	-1.42884329880387	Z
SJC_S001666	34688	35	18	0.514285714285714	-0.959358015502654	Z
SJC_S001672	12620	32	16	0.5	-1	Z
SJC_S001674	27754	33	17	0.515151515151515	-0.956931278108114	Z
SJC_S001675	35638	31	15	0.483870967741935	-1.04730571477836	Z
SJC_S001679	15104	35	17	0.485714285714286	-1.04182017569463	Z
SJC_S001686	15554	31	14	0.451612903225806	-1.14684138832927	Z
SJC_S001687	9530	110	35	0.318181818181818	-1.65207669657969	Z
SJC_S001697	130467	30	15	0.5	-1	Z
SJC_S001712	51785	35	17	0.485714285714286	-1.04182017569463	Z
SJC_S001721	46906	37	19	0.513513513513513	-0.961525852185364	Z
SJC_S001723	31063	29	16	0.551724137931034	-0.857980995127572	Z
SJC_S001735	26546	32	14	0.4375	-1.1926450779424	Z
SJC_S001739	20614	32	17	0.53125	-0.912537158749661	Z
SJC_S001746	28864	31	16	0.516129032258065	-0.954196310386875	Z
SJC_S001748	22452	30	15	0.5	-1	Z
SJC_S001787	56136	36	19	0.527777777777778	-0.921997487998727	Z
SJC_S001791	168667	45	22	0.488888888888889	-1.03242147769238	Z
SJC_S001797	51916	31	15	0.483870967741935	-1.04730571477836	Z
SJC_S001830	17426	8.2	4.5	0.548780487804878	-0.865698908288409	Z
SJC_S001834	22527	33	17	0.515151515151515	-0.956931278108114	Z
SJC_S001838	25637	36	19	0.527777777777778	-0.921997487998727	Z
SJC_S001848	43566	63	30	0.476190476190476	-1.0703893278914	Z
SJC_S001864	26921	33	17	0.515151515151515	-0.956931278108114	Z
SJC_S001871	33717	30	15	0.5	-1	Z
SJC_S001898	16808	30	16	0.533333333333333	-0.906890595608519	Z
SJC_S001904	22980	35	17	0.485714285714286	-1.04182017569463	Z
SJC_S001906	36404	33	16	0.484848484848485	-1.04439411935845	Z
SJC_S001907	35324	32	16	0.5	-1	Z
SJC_S001911	28026	34	15	0.441176470588235	-1.18057224564182	Z
SJC_S001916	30611	35	16	0.457142857142857	-1.12928301694497	Z
SJC_S001930	8728	31	14	0.451612903225806	-1.14684138832927	Z
SJC_S001934	17860	57	29	0.508771929824561	-0.974909019037169	Z
SJC_S001936	19340	35	16	0.457142857142857	-1.12928301694497	Z
SJC_S001938	14064	37	19	0.513513513513513	-0.961525852185364	Z
SJC_S001971	26986	30	15	0.5	-1	Z
SJC_S001972	14717	34	17	0.5	-1	Z
SJC_S001975	20790	33	18	0.545454545454545	-0.874469117916141	Z
SJC_S001980	19290	34	18	0.529411764705882	-0.917537839808027	Z
SJC_S001982	25287	30	14	0.466666666666667	-1.09953567355091	Z
SJC_S001983	23894	33	15	0.454545454545455	-1.13750352374993	Z
SJC_S001985	16182	35	15	0.428571428571429	-1.22239242133645	Z
SJC_S001986	14362	31	13	0.419354838709677	-1.25375659224578	Z
SJC_S001990	41158	34	17	0.5	-1	Z
SJC_S001992	15884	32	13	0.40625	-1.29956028185891	Z
SJC_S001997	28397	30	15	0.5	-1	Z
SJC_S002008	32652	40	19	0.475	-1.07400058144378	Z
SJC_S002034	13964	30	14	0.466666666666667	-1.09953567355091	Z
SJC_S002041	20521	33	13	0.393939393939394	-1.34395440121736	Z
SJC_S002050	10546	31	15	0.483870967741935	-1.04730571477836	Z
SJC_S002061	16717	34	17	0.5	-1	Z
SJC_S002062	13146	31	15	0.483870967741935	-1.04730571477836	Z
SJC_S002068	14978	32	16	0.5	-1	Z
SJC_S002074	23431	30	13	0.433333333333333	-1.20645087746743	Z
SJC_S002075	14439	32	16	0.5	-1	Z
SJC_S002076	16074	31	13	0.419354838709677	-1.25375659224578	Z
SJC_S002080	23388	33	16	0.484848484848485	-1.04439411935845	Z
SJC_S002081	15141	37	17	0.459459459459459	-1.12199052437861	Z
SJC_S002082	14488	32	15	0.46875	-1.09310940439148	Z
SJC_S002087	25989	49	24	0.489795918367347	-1.02974734339405	Z
SJC_S002089	24559	35	16	0.457142857142857	-1.12928301694497	Z
SJC_S002090	35648	35	17	0.485714285714286	-1.04182017569463	Z
SJC_S002118	13838	37	17	0.459459459459459	-1.12199052437861	Z
SJC_S002134	8006	33	14	0.424242424242424	-1.23703919730085	Z
SJC_S002140	10925	31	13	0.419354838709677	-1.25375659224578	Z
SJC_S002142	11717	36	15	0.416666666666667	-1.26303440583379	Z
SJC_S002147	30050	32	14	0.4375	-1.1926450779424	Z
SJC_S002153	24897	32	14	0.4375	-1.1926450779424	Z
SJC_S002154	3587	30	13	0.433333333333333	-1.20645087746743	Z
SJC_S002161	16488	36	18	0.5	-1	Z
SJC_S002162	19287	27	12	0.444444444444444	-1.16992500144231	Z
SJC_S002189	8413	35	16	0.457142857142857	-1.12928301694497	Z
SJC_S002190	12608	29	12	0.413793103448276	-1.27301849440642	Z
SJC_S002192	13397	30	15	0.5	-1	Z
SJC_S002197	2158	37	20	0.540540540540541	-0.887525270741587	Z
SJC_S002198	9349	33	13	0.393939393939394	-1.34395440121736	Z
SJC_S002201	5995	26	13	0.5	-1	Z
SJC_S002205	10114	35	17	0.485714285714286	-1.04182017569463	Z
SJC_S002211	17278	28	13	0.464285714285714	-1.10691520391651	Z
SJC_S002217	11691	37	18	0.486486486486487	-1.03952836418664	Z
SJC_S002218	8772	35	15	0.428571428571429	-1.22239242133645	Z
SJC_S002219	13951	32	15	0.46875	-1.09310940439148	Z
SJC_S002221	4240	37	15	0.405405405405405	-1.30256277002043	Z
SJC_S002222	11526	38	17	0.447368421052632	-1.16046467219325	Z
SJC_S002223	38367	35	17	0.485714285714286	-1.04182017569463	Z
SJC_S002225	15873	31	15	0.483870967741935	-1.04730571477836	Z
SJC_S002226	20333	33	15	0.454545454545455	-1.13750352374993	Z
SJC_S002227	24055	33	15	0.454545454545455	-1.13750352374993	Z
SJC_S002245	19199	15	7.2	0.48	-1.05889368905357	Z
SJC_S002266	58171	32	16	0.5	-1	Z
SJC_S002270	29258	32	16	0.5	-1	Z
SJC_S002282	24948	24	6.4	0.266666666666667	-1.90689059560852	Z
SJC_S002288	44394	34	17	0.5	-1	Z
SJC_S002313	22300	27	15	0.555555555555556	-0.84799690655495	Z
SJC_S002314	30859	35	17	0.485714285714286	-1.04182017569463	Z
SJC_S002316	28235	32	14	0.4375	-1.1926450779424	Z
SJC_S002320	13122	33	14	0.424242424242424	-1.23703919730085	Z
SJC_S002323	36866	23	12	0.521739130434783	-0.938599455335857	Z
SJC_S002330	30445	24	13	0.541666666666667	-0.884522782580064	Z
SJC_S002334	20118	28	15	0.535714285714286	-0.900464326449086	Z
SJC_S002343	31099	33	17	0.515151515151515	-0.956931278108114	Z
SJC_S002354	26656	40	20	0.5	-1	Z
SJC_S002356	14681	34	17	0.5	-1	Z
SJC_S002357	22702	35	18	0.514285714285714	-0.959358015502654	Z
SJC_S002359	13392	110	30	0.272727272727273	-1.87446911791614	Z
SJC_S002377	23591	29	15	0.517241379310345	-0.951090399519053	Z
SJC_S002378	5334	37	20	0.540540540540541	-0.887525270741587	Z
SJC_S002381	11625	21	11	0.523809523809524	-0.932885804141463	Z
SJC_S002382	3044	27	12	0.444444444444444	-1.16992500144231	Z
SJC_S002384	2348	43	22	0.511627906976744	-0.966833136064801	Z
SJC_S002389	23378	38	20	0.526315789473684	-0.925999418556223	Z
SJC_S002394	21226	36	18	0.5	-1	Z
SJC_S002405	15834	26	9.8	0.376923076923077	-1.40765796891325	Z
SJC_S002408	24185	36	20	0.555555555555556	-0.84799690655495	Z
SJC_S002409	16416	49	16	0.326530612244898	-1.61470984411521	Z
SJC_S002412	7515	38	17	0.447368421052632	-1.16046467219325	Z
SJC_S002413	4914	32	15	0.46875	-1.09310940439148	Z
SJC_S002415	5033	30	15	0.5	-1	Z
SJC_S002422	8955	31	17	0.548387096774194	-0.866733469136536	Z
SJC_S002425	19764	30	15	0.5	-1	Z
SJC_S002429	11347	35	19	0.542857142857143	-0.881355503501381	Z
SJC_S002439	8325	35	17	0.485714285714286	-1.04182017569463	Z
SJC_S002440	8855	33	16	0.484848484848485	-1.04439411935845	Z
SJC_S002444	13311	31	14	0.451612903225806	-1.14684138832927	Z
SJC_S002448	8541	32	15	0.46875	-1.09310940439148	Z
SJC_S002450	22553	35	17	0.485714285714286	-1.04182017569463	Z
SJC_S002473	23669	36	17	0.472222222222222	-1.08246216019197	Z
SJC_S002477	40683	35	18	0.514285714285714	-0.959358015502654	Z
SJC_S002480	7791	21	3	0.142857142857143	-2.8073549220576	Z
SJC_S002499	22662	39	21	0.538461538461538	-0.893084796083488	Z
SJC_S002506	24364	33	18	0.545454545454545	-0.874469117916141	Z
SJC_S002517	10165	47	25	0.531914893617021	-0.910732661902913	Z
SJC_S002519	16994	32	15	0.46875	-1.09310940439148	Z
SJC_S002522	61729	47	24	0.51063829787234	-0.969626350956481	Z
SJC_S002527	48719	33	18	0.545454545454545	-0.874469117916141	Z
SJC_S002532	74668	32	17	0.53125	-0.912537158749661	Z
SJC_S002537	34436	38	19	0.5	-1	Z
SJC_S002547	44362	31	17	0.548387096774194	-0.866733469136536	Z
SJC_S002550	47648	32	16	0.5	-1	Z
SJC_S002563	16462	10	5.4	0.54	-0.888968687611256	Z
SJC_S002597	47567	34	16	0.470588235294118	-1.08746284125034	Z
SJC_S002599	10975	20	8.6	0.43	-1.21759143507263	Z
SJC_S002618	24318	30	15	0.5	-1	Z
SJC_S002625	20860	34	17	0.5	-1	Z
SJC_S002660	9088	57	28	0.491228070175439	-1.02553509210714	Z
SJC_S002673	16743	41	17	0.414634146341463	-1.27008916336774	Z
SJC_S002674	29014	30	14	0.466666666666667	-1.09953567355091	Z
SJC_S002676	12582	28	14	0.5	-1	Z
SJC_S002683	22538	33	16	0.484848484848485	-1.04439411935845	Z
SJC_S002684	19631	30	14	0.466666666666667	-1.09953567355091	Z
SJC_S002689	17240	36	19	0.527777777777778	-0.921997487998727	Z
SJC_S002703	23381	29	13	0.448275862068966	-1.15754127698648	Z
SJC_S002707	11725	32	14	0.4375	-1.1926450779424	Z
SJC_S002718	10704	37	17	0.459459459459459	-1.12199052437861	Z
SJC_S002724	8257	39	20	0.512820512820513	-0.963474123974886	Z
SJC_S002725	14194	34	16	0.470588235294118	-1.08746284125034	Z
SJC_S002732	7119	110	47	0.427272727272727	-1.22677086184702	Z
SJC_S002733	7639	29	15	0.517241379310345	-0.951090399519053	Z
SJC_S002742	14043	35	17	0.485714285714286	-1.04182017569463	Z
SJC_S002743	13303	48	23	0.479166666666667	-1.06140054466414	Z
SJC_S002750	15402	32	17	0.53125	-0.912537158749661	Z
SJC_S002757	15133	390	180	0.461538461538462	-1.11547721741994	Z
SJC_S002764	9042	8.9	3.6	0.404494382022472	-1.30580842952409	Z
SJC_S002785	8087	33	16	0.484848484848485	-1.04439411935845	Z
SJC_S002793	13179	33	17	0.515151515151515	-0.956931278108114	Z
SJC_S002796	13184	39	17	0.435897435897436	-1.19793937761191	Z
SJC_S002798	3040	29	15	0.517241379310345	-0.951090399519053	Z
SJC_S002811	6574	5	1.9	0.38	-1.39592867633114	Z
SJC_S002812	14744	28	13	0.464285714285714	-1.10691520391651	Z
SJC_S002817	11627	34	16	0.470588235294118	-1.08746284125034	Z
SJC_S002820	8489	35	16	0.457142857142857	-1.12928301694497	Z
SJC_S002827	23900	30	14	0.466666666666667	-1.09953567355091	Z
SJC_S002831	7802	35	15	0.428571428571429	-1.22239242133645	Z
SJC_S002835	6845	70	34	0.485714285714286	-1.04182017569463	Z
SJC_S002840	29751	31	15	0.483870967741935	-1.04730571477836	Z
SJC_S002845	10794	32	15	0.46875	-1.09310940439148	Z
SJC_S002867	28205	23	7.3	0.317391304347826	-1.65566549206436	Z
SJC_S002887	4557	13	7.1	0.546153846153846	-0.872620693523773	Z
SJC_S002888	15277	25	13	0.52	-0.943416471633633	Z
SJC_S002910	1089	38	17	0.447368421052632	-1.16046467219325	Z
SJC_S002911	2379	10	3.5	0.35	-1.51457317282976	Z
SJC_S002920	5404	31	14	0.451612903225806	-1.14684138832927	Z
SJC_S002923	5251	95	46	0.484210526315789	-1.04629365227394	Z
SJC_S002926	8551	38	18	0.473684210526316	-1.07800251200127	Z
SJC_S002943	12965	33	14	0.424242424242424	-1.23703919730085	Z
SJC_S002951	9744	30	14	0.466666666666667	-1.09953567355091	Z
SJC_S002954	6233	36	17	0.472222222222222	-1.08246216019197	Z
SJC_S002964	16136	33	15	0.454545454545455	-1.13750352374993	Z
SJC_S002978	8661	34	16	0.470588235294118	-1.08746284125034	Z
SJC_S002980	6291	35	16	0.457142857142857	-1.12928301694497	Z
SJC_S002984	8381	34	16	0.470588235294118	-1.08746284125034	Z
SJC_S002985	13589	35	16	0.457142857142857	-1.12928301694497	Z
SJC_S002986	6123	35	17	0.485714285714286	-1.04182017569463	Z
SJC_S002991	24485	30	15	0.5	-1	Z
SJC_S002997	7071	34	16	0.470588235294118	-1.08746284125034	Z
SJC_S002998	14807	33	16	0.484848484848485	-1.04439411935845	Z
SJC_S003006	30058	34	16	0.470588235294118	-1.08746284125034	Z
SJC_S003008	14657	33	15	0.454545454545455	-1.13750352374993	Z
SJC_S003015	29637	27	15	0.555555555555556	-0.84799690655495	Z
SJC_S003030	5186	6.9	3.6	0.521739130434783	-0.938599455335857	Z
SJC_S003041	7882	35	15	0.428571428571429	-1.22239242133645	Z
SJC_S003059	4501	22	12	0.545454545454545	-0.874469117916141	Z
SJC_S003063	8088	45	15	0.333333333333333	-1.58496250072116	Z
SJC_S003081	2291	36	20	0.555555555555556	-0.84799690655495	Z
SJC_S003082	2485	33	13	0.393939393939394	-1.34395440121736	Z
SJC_S003094	12142	33	16	0.484848484848485	-1.04439411935845	Z
SJC_S003137	1936	30	13	0.433333333333333	-1.20645087746743	Z
SJC_S003140	11719	32	16	0.5	-1	Z
SJC_S003142	3267	24	9.9	0.4125	-1.27753397552891	Z
SJC_S003149	2015	31	11	0.354838709677419	-1.49476469174958	Z
SJC_S003163	11805	20	7.4	0.37	-1.43440282414577	Z
SJC_S003170	19220	37	19	0.513513513513513	-0.961525852185364	Z
SJC_S003189	9699	33	16	0.484848484848485	-1.04439411935845	Z
SJC_S003198	4530	33	14	0.424242424242424	-1.23703919730085	Z
SJC_S003200	2554	37	17	0.459459459459459	-1.12199052437861	Z
SJC_S003205	4927	33	17	0.515151515151515	-0.956931278108114	Z
SJC_S003207	11107	32	15	0.46875	-1.09310940439148	Z
SJC_S003214	2596	27	13	0.481481481481481	-1.05444778402238	Z
SJC_S003215	19243	33	15	0.454545454545455	-1.13750352374993	Z
SJC_S003218	28759	31	16	0.516129032258065	-0.954196310386875	Z
SJC_S003221	15191	33	17	0.515151515151515	-0.956931278108114	Z
SJC_S003228	6873	35	19	0.542857142857143	-0.881355503501381	Z
SJC_S003234	5753	35	16	0.457142857142857	-1.12928301694497	Z
SJC_S003235	8584	39	19	0.487179487179487	-1.03747470541866	Z
SJC_S003236	3591	31	15	0.483870967741935	-1.04730571477836	Z
SJC_S003238	4903	31	15	0.483870967741935	-1.04730571477836	Z
SJC_S003241	7010	29	13	0.448275862068966	-1.15754127698648	Z
SJC_S003244	11024	34	16	0.470588235294118	-1.08746284125034	Z
SJC_S003248	10935	30	14	0.466666666666667	-1.09953567355091	Z
SJC_S003258	12965	33	14	0.424242424242424	-1.23703919730085	Z
SJC_S003262	9761	29	16	0.551724137931034	-0.857980995127572	Z
SJC_S003271	15001	29	13	0.448275862068966	-1.15754127698648	Z
SJC_S003292	30040	59	27	0.457627118644068	-1.12775554719837	Z
SJC_S003315	3340	50	24	0.48	-1.05889368905357	Z
SJC_S003320	4797	2.2	1.2	0.545454545454545	-0.874469117916141	Z
SJC_S003329	4625	37	17	0.459459459459459	-1.12199052437861	Z
SJC_S003355	4060	38	18	0.473684210526316	-1.07800251200127	Z
SJC_S003368	1559	3.7	1.8	0.486486486486486	-1.03952836418664	Z
SJC_S003386	11792	31	15	0.483870967741935	-1.04730571477836	Z
SJC_S003387	2541	87	26	0.298850574712644	-1.74250377770764	Z
SJC_S003390	5112	19	9.5	0.5	-1	Z
SJC_S003402	1627	22	10	0.454545454545455	-1.13750352374993	Z
SJC_S003416	3509	39	15	0.384615384615385	-1.37851162325373	Z
SJC_S003419	1023	27	12	0.444444444444444	-1.16992500144231	Z
SJC_S003432	5362	34	16	0.470588235294118	-1.08746284125034	Z
SJC_S003435	1622	31	5.6	0.180645161290323	-2.46876948321663	Z
SJC_S003437	6531	33	12	0.363636363636364	-1.4594316186373	Z
SJC_S003443	9346	34	18	0.529411764705882	-0.917537839808027	Z
SJC_S003448	2363	36	19	0.527777777777778	-0.921997487998727	Z
SJC_S003449	2538	33	14	0.424242424242424	-1.23703919730085	Z
SJC_S003458	10077	32	14	0.4375	-1.1926450779424	Z
SJC_S003462	2251	32	14	0.4375	-1.1926450779424	Z
SJC_S003465	8019	31	13	0.419354838709677	-1.25375659224578	Z
SJC_S003466	1515	32	15	0.46875	-1.09310940439148	Z
SJC_S003467	6651	32	14	0.4375	-1.1926450779424	Z
SJC_S003470	8670	29	14	0.482758620689655	-1.05062607306997	Z
SJC_S003479	3539	33	14	0.424242424242424	-1.23703919730085	Z
SJC_S003486	3692	30	13	0.433333333333333	-1.20645087746743	Z
SJC_S003490	3183	21	8	0.380952380952381	-1.39231742277876	Z
SJC_S003497	7507	31	17	0.548387096774194	-0.866733469136536	Z
SJC_S003501	1514	29	13	0.448275862068966	-1.15754127698648	Z
SJC_S003505	1170	34	16	0.470588235294118	-1.08746284125034	Z
SJC_S003510	9007	36	16	0.444444444444444	-1.16992500144231	Z
SJC_S003511	1518	28	15	0.535714285714286	-0.900464326449086	Z
SJC_S003513	7221	32	14	0.4375	-1.1926450779424	Z
SJC_S003514	6989	25	10	0.4	-1.32192809488736	Z
SJC_S003517	1887	25	11	0.44	-1.18442457113743	Z
SJC_S003521	1512	27	11	0.407407407407407	-1.29545588352617	Z
SJC_S003522	10341	31	15	0.483870967741935	-1.04730571477836	Z
SJC_S003536	13405	33	15	0.454545454545455	-1.13750352374993	Z
SJC_S003538	15961	33	17	0.515151515151515	-0.956931278108114	Z
SJC_S003540	30721	32	16	0.5	-1	Z
SJC_S003541	10836	34	18	0.529411764705882	-0.917537839808027	Z
SJC_S003548	15332	34	15	0.441176470588235	-1.18057224564182	Z
SJC_S003549	1158	36	18	0.5	-1	Z
SJC_S003552	1618	28	12	0.428571428571429	-1.22239242133645	Z
SJC_S003554	6633	36	16	0.444444444444444	-1.16992500144231	Z
SJC_S003562	11105	30	14	0.466666666666667	-1.09953567355091	Z
SJC_S003568	10948	34	17	0.5	-1	Z
SJC_S003570	5947	30	14	0.466666666666667	-1.09953567355091	Z
SJC_S003574	19147	36	17	0.472222222222222	-1.08246216019197	Z
SJC_S003576	13125	32	15	0.46875	-1.09310940439148	Z
SJC_S003577	2245	35	14	0.4	-1.32192809488736	Z
SJC_S003578	1949	27	10	0.37037037037037	-1.43295940727611	Z
SJC_S003579	5433	31	17	0.548387096774194	-0.866733469136536	Z
SJC_S003580	7406	34	15	0.441176470588235	-1.18057224564182	Z
SJC_S003585	25508	35	17	0.485714285714286	-1.04182017569463	Z
SJC_S003587	9593	34	16	0.470588235294118	-1.08746284125034	Z
SJC_S003618	42956	38	19	0.5	-1	Z
SJC_S003683	14135	110	34	0.309090909090909	-1.69389687227432	Z
SJC_S003687	27732	32	15	0.46875	-1.09310940439148	Z
SJC_S003718	22062	33	17	0.515151515151515	-0.956931278108114	Z
SJC_S003722	18771	35	17	0.485714285714286	-1.04182017569463	Z
SJC_S003725	20330	37	19	0.513513513513513	-0.961525852185364	Z
SJC_S003728	25683	34	16	0.470588235294118	-1.08746284125034	Z
SJC_S003744	14144	37	20	0.540540540540541	-0.887525270741587	Z
SJC_S003754	18935	33	15	0.454545454545455	-1.13750352374993	Z
SJC_S003769	13273	36	19	0.527777777777778	-0.921997487998727	Z
SJC_S003780	5411	15	6.8	0.453333333333333	-1.14135584924554	Z
SJC_S003782	21560	31	15	0.483870967741935	-1.04730571477836	Z
SJC_S003800	26823	50	26	0.52	-0.943416471633633	Z
SJC_S003801	14838	40	19	0.475	-1.07400058144378	Z
SJC_S003803	12259	33	16	0.484848484848485	-1.04439411935845	Z
SJC_S003808	9475	40	20	0.5	-1	Z
SJC_S003817	17997	34	18	0.529411764705882	-0.917537839808027	Z
SJC_S003830	17885	36	18	0.5	-1	Z
SJC_S003837	20653	41	22	0.536585365853659	-0.898120385980786	Z
SJC_S003861	21493	38	18	0.473684210526316	-1.07800251200127	Z
SJC_S003874	10840	30	15	0.5	-1	Z
SJC_S003885	10645	32	16	0.5	-1	Z
SJC_S003888	10508	31	13	0.419354838709677	-1.25375659224578	Z
SJC_S003894	23081	33	16	0.484848484848485	-1.04439411935845	Z
SJC_S003896	4598	7.6	3.7	0.486842105263158	-1.03847414781464	Z
SJC_S003900	6240	3.7	1.1	0.297297297297297	-1.75002174699165	Z
SJC_S003901	16615	30	16	0.533333333333333	-0.906890595608519	Z
SJC_S003906	6740	25	12	0.48	-1.05889368905357	Z
SJC_S003919	14150	37	18	0.486486486486487	-1.03952836418664	Z
SJC_S003921	14138	34	16	0.470588235294118	-1.08746284125034	Z
SJC_S003925	4151	3.4	1.3	0.382352941176471	-1.38702312310925	Z
SJC_S003929	7626	31	14	0.451612903225806	-1.14684138832927	Z
SJC_S003931	3858	32	16	0.5	-1	Z
SJC_S003948	9057	34	18	0.529411764705882	-0.917537839808027	Z
SJC_S003949	13972	31	15	0.483870967741935	-1.04730571477836	Z
SJC_S003957	12028	63	29	0.46031746031746	-1.11929892837234	Z
SJC_S003969	12476	36	17	0.472222222222222	-1.08246216019197	Z
SJC_S003971	14686	30	16	0.533333333333333	-0.906890595608519	Z
SJC_S003973	53386	36	19	0.527777777777778	-0.921997487998727	Z
SJC_S003979	60367	33	15	0.454545454545455	-1.13750352374993	Z
SJC_S003980	53820	33	16	0.484848484848485	-1.04439411935845	Z
SJC_S004004	13297	36	19	0.527777777777778	-0.921997487998727	Z
SJC_S004006	54964	31	15	0.483870967741935	-1.04730571477836	Z
SJC_S004022	11953	110	35	0.318181818181818	-1.65207669657969	Z
SJC_S004029	14406	26	14	0.538461538461538	-0.893084796083488	Z
SJC_S004034	6202	29	16	0.551724137931034	-0.857980995127572	Z
SJC_S004038	8566	30	13	0.433333333333333	-1.20645087746743	Z
SJC_S004050	17979	34	14	0.411764705882353	-1.28010791919274	Z
SJC_S004054	5216	16	8.7	0.54375	-0.878984599038634	Z
SJC_S004055	6786	35	18	0.514285714285714	-0.959358015502654	Z
SJC_S004056	12909	28	15	0.535714285714286	-0.900464326449086	Z
SJC_S004087	39113	50	26	0.52	-0.943416471633633	Z
SJC_S004121	9594	15	6.3	0.42	-1.25153876699596	Z
SJC_S004148	4053	18	8.1	0.45	-1.15200309344505	Z
SJC_S004161	21372	35	17	0.485714285714286	-1.04182017569463	Z
SJC_S004167	19084	29	13	0.448275862068966	-1.15754127698648	Z
SJC_S004178	21921	41	20	0.48780487804878	-1.03562390973072	Z
SJC_S004194	17957	36	19	0.527777777777778	-0.921997487998727	Z
SJC_S004203	19697	31	16	0.516129032258065	-0.954196310386875	Z
SJC_S004211	10643	31	14	0.451612903225806	-1.14684138832927	Z
SJC_S004213	16836	54	28	0.518518518518518	-0.947532580105864	Z
SJC_S004225	12046	41	20	0.48780487804878	-1.03562390973072	Z
SJC_S004233	4601	12	5.5	0.458333333333333	-1.12553088208386	Z
SJC_S004240	22105	32	15	0.46875	-1.09310940439148	Z
SJC_S004256	13210	34	16	0.470588235294118	-1.08746284125034	Z
SJC_S004273	4032	33	18	0.545454545454545	-0.874469117916141	Z
SJC_S004275	5771	26	13	0.5	-1	Z
SJC_S004283	17003	37	16	0.432432432432432	-1.20945336562895	Z
SJC_S004292	14267	34	17	0.5	-1	Z
SJC_S004302	23012	35	17	0.485714285714286	-1.04182017569463	Z
SJC_S004307	13801	36	16	0.444444444444444	-1.16992500144231	Z
SJC_S004314	4953	15	7.8	0.52	-0.943416471633633	Z
SJC_S004316	18265	8.6	1.3	0.151162790697674	-2.72582503656101	Z
SJC_S004325	10420	19	9.3	0.489473684210526	-1.03069679722292	Z
SJC_S004344	7538	19	9.1	0.478947368421053	-1.06206096813225	Z
SJC_S004363	25444	32	15	0.46875	-1.09310940439148	Z
SJC_S004364	7923	32	17	0.53125	-0.912537158749661	Z
SJC_S004368	8550	27	8.8	0.325925925925926	-1.61738397841353	Z
SJC_S004369	4677	34	15	0.441176470588235	-1.18057224564182	Z
SJC_S004374	2599	85	47	0.552941176470588	-0.854802084460064	Z
SJC_S004409	9971	34	17	0.5	-1	Z
SJC_S004429	15033	31	16	0.516129032258065	-0.954196310386875	Z
SJC_S004438	17375	35	17	0.485714285714286	-1.04182017569463	Z
SJC_S004439	9599	28	15	0.535714285714286	-0.900464326449086	Z
SJC_S004440	10261	35	17	0.485714285714286	-1.04182017569463	Z
SJC_S004445	1088	24	13	0.541666666666667	-0.884522782580064	Z
SJC_S004458	9226	31	14	0.451612903225806	-1.14684138832927	Z
SJC_S004461	10039	36	16	0.444444444444444	-1.16992500144231	Z
SJC_S004472	11427	34	14	0.411764705882353	-1.28010791919274	Z
SJC_S004474	21623	39	19	0.487179487179487	-1.03747470541866	Z
SJC_S004475	24015	35	18	0.514285714285714	-0.959358015502654	Z
SJC_S004482	12564	37	16	0.432432432432432	-1.20945336562895	Z
SJC_S004485	30846	38	19	0.5	-1	Z
SJC_S004498	4116	16	4.4	0.275	-1.86249647625006	Z
SJC_S004526	3547	13	4.7	0.361538461538462	-1.46777896135082	Z
SJC_S004535	10373	32	16	0.5	-1	Z
SJC_S004602	1706	22	8.8	0.4	-1.32192809488736	Z
SJC_S004612	1066	16	5.9	0.36875	-1.43928504552552	Z
SJC_S004613	9572	42	21	0.5	-1	Z
SJC_S004618	2314	3.6	2	0.555555555555556	-0.84799690655495	Z
SJC_S004622	10011	22	12	0.545454545454545	-0.874469117916141	Z
SJC_S004625	5172	32	17	0.53125	-0.912537158749661	Z
SJC_S004633	3569	38	18	0.473684210526316	-1.07800251200127	Z
SJC_S004660	1326	10	3	0.3	-1.73696559416621	Z
SJC_S004663	2207	45	18	0.4	-1.32192809488736	Z
SJC_S004666	1607	35	15	0.428571428571429	-1.22239242133645	Z
SJC_S004674	2766	7.6	2.5	0.328947368421053	-1.60407132366886	Z
SJC_S004690	7854	30	15	0.5	-1	Z
SJC_S004695	8457	31	15	0.483870967741935	-1.04730571477836	Z
SJC_S004699	6304	34	13	0.382352941176471	-1.38702312310925	Z
SJC_S004700	2260	27	14	0.518518518518518	-0.947532580105864	Z
SJC_S004703	1195	18	9.1	0.505555555555556	-0.984058456130979	Z
SJC_S004713	26577	32	15	0.46875	-1.09310940439148	Z
SJC_S004720	20944	28	13	0.464285714285714	-1.10691520391651	Z
SJC_S004721	22507	35	18	0.514285714285714	-0.959358015502654	Z
SJC_S004725	11855	31	15	0.483870967741935	-1.04730571477836	Z
SJC_S004730	9768	35	17	0.485714285714286	-1.04182017569463	Z
SJC_S004739	14612	30	16	0.533333333333333	-0.906890595608519	Z
SJC_S004740	11131	42	20	0.476190476190476	-1.0703893278914	Z
SJC_S004752	7429	110	32	0.290909090909091	-1.78135971352466	Z
SJC_S004754	10168	36	14	0.388888888888889	-1.36257007938471	Z
SJC_S004756	7102	36	17	0.472222222222222	-1.08246216019197	Z
SJC_S004775	5911	36	19	0.527777777777778	-0.921997487998727	Z
SJC_S004781	23653	36	19	0.527777777777778	-0.921997487998727	Z
SJC_S004789	16219	33	17	0.515151515151515	-0.956931278108114	Z
SJC_S004792	8325	35	17	0.485714285714286	-1.04182017569463	Z
SJC_S004804	5916	33	11	0.333333333333333	-1.58496250072116	Z
SJC_S004807	9905	34	16	0.470588235294118	-1.08746284125034	Z
SJC_S004813	4247	36	17	0.472222222222222	-1.08246216019197	Z
SJC_S004816	8341	65	33	0.507692307692308	-0.977973693670001	Z
SJC_S004819	5697	36	18	0.5	-1	Z
SJC_S004822	14715	33	17	0.515151515151515	-0.956931278108114	Z
SJC_S004829	13422	35	16	0.457142857142857	-1.12928301694497	Z
SJC_S004830	22133	33	15	0.454545454545455	-1.13750352374993	Z
SJC_S004838	24321	31	14	0.451612903225806	-1.14684138832927	Z
SJC_S004847	26955	35	16	0.457142857142857	-1.12928301694497	Z
SJC_S004864	7061	26	12	0.461538461538462	-1.11547721741994	Z
SJC_S004880	19359	34	17	0.5	-1	Z
SJC_S004884	6361	22	11	0.5	-1	Z
SJC_S004886	4723	87	45	0.517241379310345	-0.951090399519053	Z
SJC_S004887	14128	48	26	0.541666666666667	-0.884522782580064	Z
SJC_S004892	5964	9.3	5	0.537634408602151	-0.895302621333307	Z
SJC_S004901	2027	17	6.9	0.405882352941176	-1.30086647935953	Z
SJC_S004910	12517	15	7.8	0.52	-0.943416471633633	Z
SJC_S004912	5243	14	7.8	0.557142857142857	-0.843880798082718	Z
SJC_S004919	3451	7.8	3.8	0.487179487179487	-1.03747470541866	Z
SJC_S004924	7689	17	6.3	0.370588235294118	-1.43211101263779	Z
SJC_S004939	9856	30	16	0.533333333333333	-0.906890595608519	Z
SJC_S004971	3154	2.4	1.1	0.458333333333333	-1.12553088208386	Z
SJC_S004972	2249	20	9.5	0.475	-1.07400058144378	Z
SJC_S004991	1837	10	3	0.3	-1.73696559416621	Z
SJC_S005001	8811	110	34	0.309090909090909	-1.69389687227432	Z
SJC_S005048	3106	9	4.6	0.511111111111111	-0.968291140272662	Z
SJC_S005052	3623	30	16	0.533333333333333	-0.906890595608519	Z
SJC_S005053	1760	20	10	0.5	-1	Z
SJC_S005063	1263	41	12	0.292682926829268	-1.77258950389693	Z
SJC_S005073	1415	15	6.5	0.433333333333333	-1.20645087746743	Z
SJC_S005076	1133	12	6	0.5	-1	Z
SJC_S005094	1188	23	12	0.521739130434783	-0.938599455335857	Z
SJC_S005097	3628	30	13	0.433333333333333	-1.20645087746743	Z
SJC_S005123	1237	14	5.6	0.4	-1.32192809488736	Z
SJC_S005130	4417	30	14	0.466666666666667	-1.09953567355091	Z
SJC_S005132	1737	8.9	4.7	0.528089887640449	-0.92114457928876	Z
SJC_S005165	7920	21	10	0.476190476190476	-1.0703893278914	Z
SJC_S005166	1880	38	19	0.5	-1	Z
SJC_S005172	13410	34	18	0.529411764705882	-0.917537839808027	Z
SJC_S005174	2398	23	8.4	0.365217391304348	-1.45317262816561	Z
SJC_S005176	18402	32	14	0.4375	-1.1926450779424	Z
SJC_S005197	7348	22	12	0.545454545454545	-0.874469117916141	Z
SJC_S005200	6532	17	8.8	0.517647058823529	-0.949959317500404	Z
SJC_S005206	1085	21	5.8	0.276190476190476	-1.85626452253855	Z
SJC_S005207	1567	18	6.5	0.361111111111111	-1.46948528330122	Z
SJC_S005222	3204	16	7.8	0.4875	-1.03652587602511	Z
SJC_S005223	2514	18	7.7	0.427777777777778	-1.22506655563477	Z
SJC_S005242	1816	4	1.4	0.35	-1.51457317282976	Z
SJC_S005248	1188	33	18	0.545454545454545	-0.874469117916141	Z
SJC_S005252	2223	16	8.8	0.55	-0.862496476250065	Z
SJC_S005256	1620	6.3	1.6	0.253968253968254	-1.97727992349992	Z
SJC_S005278	1267	33	13	0.393939393939394	-1.34395440121736	Z
SJC_S005282	4810	27	15	0.555555555555556	-0.84799690655495	Z
SJC_S005288	2665	31	13	0.419354838709677	-1.25375659224578	Z
SJC_S005289	1152	37	18	0.486486486486487	-1.03952836418664	Z
SJC_S005302	2702	29	13	0.448275862068966	-1.15754127698648	Z
SJC_S005309	1297	34	15	0.441176470588235	-1.18057224564182	Z
SJC_S005311	4415	29	10	0.344827586206897	-1.53605290024021	Z
SJC_S005316	1458	32	16	0.5	-1	Z
SJC_S005318	1485	7.7	3.7	0.480519480519481	-1.05733317506595	Z
SJC_S005320	2648	11	4	0.363636363636364	-1.4594316186373	Z
SJC_S005327	3797	33	16	0.484848484848485	-1.04439411935845	Z
SJC_S005329	1738	15	3.5	0.233333333333333	-2.09953567355091	Z
SJC_S005333	1382	16	8.7	0.54375	-0.878984599038634	Z
SJC_S005334	2550	33	18	0.545454545454545	-0.874469117916141	Z
SJC_S005337	7089	23	11	0.478260869565217	-1.06413033741972	Z
SJC_S005344	2647	26	13	0.5	-1	Z
SJC_S005347	1676	3.1	1.4	0.451612903225806	-1.14684138832927	Z
SJC_S005353	5120	36	20	0.555555555555556	-0.84799690655495	Z
SJC_S005359	4330	38	17	0.447368421052632	-1.16046467219325	Z
SJC_S005369	1629	26	5.1	0.196153846153846	-2.34994247105696	Z
SJC_S005373	4038	34	16	0.470588235294118	-1.08746284125034	Z
SJC_S005378	3766	21	9.5	0.452380952380952	-1.14438990933517	Z
SJC_S005380	1111	29	7.7	0.26551724137931	-1.91312254932003	Z
SJC_S005387	1526	63	32	0.507936507936508	-0.977279923499917	Z
SJC_S005392	2204	14	3.5	0.25	-2	Z
SJC_S005412	6246	31	15	0.483870967741935	-1.04730571477836	Z
SJC_S005413	1046	8.5	4.1	0.482352941176471	-1.05183893151962	Z
SJC_S005423	5753	26	14	0.538461538461538	-0.893084796083488	Z
SJC_S005441	3371	29	16	0.551724137931034	-0.857980995127572	Z
SJC_S005447	6177	31	14	0.451612903225806	-1.14684138832927	Z
SJC_S005449	2772	78	26	0.333333333333333	-1.58496250072116	Z
SJC_S005459	1293	19	9.8	0.515789473684211	-0.955145764215739	Z
SJC_S005461	1536	39	20	0.512820512820513	-0.963474123974886	Z
SJC_S005462	2254	33	18	0.545454545454545	-0.874469117916141	Z
SJC_S005478	6357	14	6.8	0.485714285714286	-1.04182017569463	Z
SJC_S005491	1863	18	9.2	0.511111111111111	-0.968291140272662	Z
SJC_S005496	11415	32	15	0.46875	-1.09310940439148	Z
SJC_S005497	1542	65	33	0.507692307692308	-0.977973693670001	Z
SJC_S005515	12011	32	17	0.53125	-0.912537158749661	Z
SJC_S005525	9785	36	15	0.416666666666667	-1.26303440583379	Z
SJC_S005530	4642	30	14	0.466666666666667	-1.09953567355091	Z
SJC_S005534	2309	27	12	0.444444444444444	-1.16992500144231	Z
SJC_S005535	17950	34	16	0.470588235294118	-1.08746284125034	Z
SJC_S005541	13537	36	19	0.527777777777778	-0.921997487998727	Z
SJC_S005551	2967	31	14	0.451612903225806	-1.14684138832927	Z
SJC_S005552	1539	17	3.3	0.194117647058824	-2.36499681677925	Z
SJC_S005573	2504	25	12	0.48	-1.05889368905357	Z
SJC_S005574	1982	34	16	0.470588235294118	-1.08746284125034	Z
SJC_S005575	2955	16	8.4	0.525	-0.929610672108602	Z
SJC_S005576	4291	33	15	0.454545454545455	-1.13750352374993	Z
SJC_S005578	5013	30	15	0.5	-1	Z
SJC_S005601	4441	32	14	0.4375	-1.1926450779424	Z
SJC_S005606	5725	32	16	0.5	-1	Z
SJC_S005617	7160	35	16	0.457142857142857	-1.12928301694497	Z
SJC_S005623	8907	28	12	0.428571428571429	-1.22239242133645	Z
SJC_S005624	3968	33	13	0.393939393939394	-1.34395440121736	Z
SJC_S005626	1960	31	14	0.451612903225806	-1.14684138832927	Z
SJC_S005628	6627	34	14	0.411764705882353	-1.28010791919274	Z
SJC_S005631	15218	33	17	0.515151515151515	-0.956931278108114	Z
SJC_S005633	1012	10	4	0.4	-1.32192809488736	Z
SJC_S005663	9042	33	17	0.515151515151515	-0.956931278108114	Z
SJC_S005664	7846	34	13	0.382352941176471	-1.38702312310925	Z
SJC_S005670	8292	33	15	0.454545454545455	-1.13750352374993	Z
SJC_S005678	6421	30	14	0.466666666666667	-1.09953567355091	Z
SJC_S005685	1106	32	17	0.53125	-0.912537158749661	Z
SJC_S005689	2141	35	17	0.485714285714286	-1.04182017569463	Z
SJC_S005690	1527	35	12	0.342857142857143	-1.54432051622381	Z
SJC_S005696	5888	30	12	0.4	-1.32192809488736	Z
SJC_S005708	2714	35	12	0.342857142857143	-1.54432051622381	Z
SJC_S005718	7437	32	16	0.5	-1	Z
SJC_S005721	9359	36	17	0.472222222222222	-1.08246216019197	Z
SJC_S005727	6974	35	15	0.428571428571429	-1.22239242133645	Z
SJC_S005730	15660	39	19	0.487179487179487	-1.03747470541866	Z
SJC_S005736	6042	35	18	0.514285714285714	-0.959358015502654	Z
SJC_S005741	10036	33	16	0.484848484848485	-1.04439411935845	Z
SJC_S005754	4795	33	14	0.424242424242424	-1.23703919730085	Z
SJC_S005759	2073	32	12	0.375	-1.41503749927884	Z
SJC_S005762	1675	34	18	0.529411764705882	-0.917537839808027	Z
SJC_S005766	10984	37	18	0.486486486486487	-1.03952836418664	Z
SJC_S005767	10799	32	14	0.4375	-1.1926450779424	Z
SJC_S005768	4682	32	17	0.53125	-0.912537158749661	Z
SJC_S005774	14232	29	13	0.448275862068966	-1.15754127698648	Z
SJC_S005781	9188	31	16	0.516129032258065	-0.954196310386875	Z
SJC_S005790	9077	29	14	0.482758620689655	-1.05062607306997	Z
SJC_S005810	6738	38	18	0.473684210526316	-1.07800251200127	Z
SJC_S005818	4774	42	19	0.452380952380952	-1.14438990933517	Z
SJC_S005821	2803	3.1	1.6	0.516129032258065	-0.954196310386875	Z
SJC_S005823	5342	10	5.1	0.51	-0.971430847803229	Z
SJC_S005832	7266	83	40	0.481927710843373	-1.05311133645956	Z
SJC_S005847	7602	140	65	0.464285714285714	-1.10691520391651	Z
SJC_S005851	2761	28	13	0.464285714285714	-1.10691520391651	Z
SJC_S005866	3801	7.7	2.6	0.337662337662338	-1.56634682255381	Z
SJC_S005884	4443	30	16	0.533333333333333	-0.906890595608519	Z
SJC_S005892	2956	3	1.4	0.466666666666667	-1.09953567355091	Z
SJC_S005893	2688	22	9.2	0.418181818181818	-1.25779775746765	Z
SJC_S005898	3547	34	17	0.5	-1	Z
SJC_S005903	1656	6.4	2.9	0.453125	-1.14201900487243	Z
SJC_S005910	1308	15	7	0.466666666666667	-1.09953567355091	Z
SJC_S005920	7439	32	16	0.5	-1	Z
SJC_S005924	5064	24	11	0.458333333333333	-1.12553088208386	Z
SJC_S005925	4140	7.9	3.8	0.481012658227848	-1.05585323473352	Z
SJC_S005933	5357	29	16	0.551724137931034	-0.857980995127572	Z
SJC_S005948	1618	28	13	0.464285714285714	-1.10691520391651	Z
SJC_S005992	3281	27	15	0.555555555555556	-0.84799690655495	Z
SJC_S005994	2425	23	12	0.521739130434783	-0.938599455335857	Z
SJC_S005997	2123	28	14	0.5	-1	Z
SJC_S005998	3144	25	7.2	0.288	-1.79585928321977	Z
SJC_S006011	3983	33	16	0.484848484848485	-1.04439411935845	Z
SJC_S006018	1227	25	12	0.48	-1.05889368905357	Z
SJC_S006019	1568	32	17	0.53125	-0.912537158749661	Z
SJC_S006030	2941	26	14	0.538461538461538	-0.893084796083488	Z
SJC_S006038	1626	20	10	0.5	-1	Z
SJC_S006041	1239	5.7	2.7	0.473684210526316	-1.07800251200127	Z
SJC_S006049	1177	30	14	0.466666666666667	-1.09953567355091	Z
SJC_S006055	1263	10	3.5	0.35	-1.51457317282976	Z
SJC_S006061	11502	31	14	0.451612903225806	-1.14684138832927	Z
SJC_S006063	1374	7.3	3.3	0.452054794520548	-1.14543043952156	Z
SJC_S006064	3080	27	14	0.518518518518518	-0.947532580105864	Z
SJC_S006065	2181	30	15	0.5	-1	Z
SJC_S006070	9234	27	14	0.518518518518518	-0.947532580105864	Z
SJC_S006074	10105	33	14	0.424242424242424	-1.23703919730085	Z
SJC_S006083	3200	3.4	1.4	0.411764705882353	-1.28010791919274	Z
SJC_S006086	1865	3.8	1.9	0.5	-1	Z
SJC_S006093	2766	8.4	2.9	0.345238095238095	-1.53433642765119	Z
SJC_S006099	12088	34	17	0.5	-1	Z
SJC_S006124	2580	15	5.5	0.366666666666667	-1.44745897697122	Z
SJC_S006126	2274	31	12	0.387096774193548	-1.36923380966572	Z
SJC_S006128	1114	24	11	0.458333333333333	-1.12553088208386	Z
SJC_S006132	3450	47	16	0.340425531914894	-1.55458885167764	Z
SJC_S006163	3231	31	12	0.387096774193548	-1.36923380966572	Z
SJC_S006169	1143	14	3.7	0.264285714285714	-1.91982965131602	Z
SJC_S006202	2192	26	12	0.461538461538462	-1.11547721741994	Z
SJC_S006211	1816	11	5.6	0.509090909090909	-0.974004791467056	Z
SJC_S006252	1172	22	10	0.454545454545455	-1.13750352374993	Z
SJC_S006258	1200	40	17	0.425	-1.23446525363702	Z
SJC_S006260	1108	4.5	1.8	0.4	-1.32192809488736	Z
SJC_S006282	2124	9.9	4.2	0.424242424242424	-1.23703919730085	Z
SJC_S006285	1632	8.8	2	0.227272727272727	-2.13750352374994	Z
SJC_S006288	2339	19	6.9	0.363157894736842	-1.46133115155278	Z
SJC_S006332	4299	30	14	0.466666666666667	-1.09953567355091	Z
SJC_S006346	1053	21	7.8	0.371428571428571	-1.42884329880387	Z
SJC_S006350	9818	32	13	0.40625	-1.29956028185891	Z
SJC_S006390	1280	29	16	0.551724137931034	-0.857980995127572	Z
SJC_S006400	3685	24	13	0.541666666666667	-0.884522782580064	Z
SJC_S006438	1226	27	15	0.555555555555556	-0.84799690655495	Z
SJC_S006456	1604	37	13	0.351351351351351	-1.50901364748786	Z
SJC_S006465	1685	29	9.4	0.324137931034483	-1.6253202383373	Z
SJC_S006480	1473	5.7	2.8	0.491228070175439	-1.02553509210714	Z
SJC_S006487	1429	7.8	3.1	0.397435897435897	-1.33120590847537	Z
SJC_S006491	2544	6.4	1.8	0.28125	-1.83007499855769	Z
SJC_S006495	1526	17	7.4	0.435294117647059	-1.19993757050875	Z
SJC_S006530	1223	24	13	0.541666666666667	-0.884522782580064	Z
SJC_S006532	1037	22	12	0.545454545454545	-0.874469117916141	Z
SJC_S006547	1265	10	3.5	0.35	-1.51457317282976	Z
SJC_S006555	1908	14	6.4	0.457142857142857	-1.12928301694497	Z
SJC_S006559	1930	33	16	0.484848484848485	-1.04439411935845	Z
SJC_S006590	2350	26	11	0.423076923076923	-1.24100809950379	Z
SJC_S006591	1343	42	17	0.404761904761905	-1.30485458152842	Z
SJC_S006593	1137	21	11	0.523809523809524	-0.932885804141463	Z
SJC_S006606	1292	31	16	0.516129032258065	-0.954196310386875	Z
SJC_S006610	1281	9	1.5	0.166666666666667	-2.58496250072116	Z
SJC_S006613	3335	34	18	0.529411764705882	-0.917537839808027	Z
SJC_S006624	2375	35	13	0.371428571428571	-1.42884329880387	Z
SJC_S006638	3698	27	12	0.444444444444444	-1.16992500144231	Z
SJC_S006653	1959	31	12	0.387096774193548	-1.36923380966572	Z
SJC_S006666	1419	14	5	0.357142857142857	-1.48542682717024	Z
SJC_S006681	1963	28	13	0.464285714285714	-1.10691520391651	Z
SJC_S006708	3181	32	15	0.46875	-1.09310940439148	Z
SJC_S006717	3734	31	14	0.451612903225806	-1.14684138832927	Z
SJC_S006726	1602	59	21	0.355932203389831	-1.49032562658308	Z
SJC_S006745	6413	35	19	0.542857142857143	-0.881355503501381	Z
SJC_S006750	1013	31	11	0.354838709677419	-1.49476469174958	Z
SJC_S006765	10175	32	14	0.4375	-1.1926450779424	Z
SJC_S006766	3667	25	13	0.52	-0.943416471633633	Z
SJC_S006773	5230	30	15	0.5	-1	Z
SJC_S006793	1430	16	8.8	0.55	-0.862496476250065	Z
SJC_S006804	13218	35	18	0.514285714285714	-0.959358015502654	Z
SJC_S006805	1249	30	10	0.333333333333333	-1.58496250072116	Z
SJC_S006812	9508	16	5.8	0.3625	-1.46394709975979	Z
SJC_S006829	4996	35	14	0.4	-1.32192809488736	Z
SJC_S006854	1632	7.7	1.9	0.246753246753247	-2.01885902725132	Z
SJC_S006862	1681	16	7.7	0.48125	-1.05514155419246	Z
SJC_S006866	1150	26	11	0.423076923076923	-1.24100809950379	Z
SJC_S006868	3683	34	15	0.441176470588235	-1.18057224564182	Z
SJC_S006871	6544	14	3.1	0.221428571428571	-2.17508670655809	Z
SJC_S006877	5509	36	16	0.444444444444444	-1.16992500144231	Z
SJC_S006881	2329	12	4.7	0.391666666666667	-1.35230174393088	Z
SJC_S006892	1018	27	15	0.555555555555556	-0.84799690655495	Z
SJC_S006895	1298	13	2.1	0.161538461538462	-2.63005039024969	Z
SJC_S006900	3570	31	13	0.419354838709677	-1.25375659224578	Z
SJC_S006907	8587	32	13	0.40625	-1.29956028185891	Z
SJC_S006916	1699	11	3.8	0.345454545454545	-1.53343220008107	Z
SJC_S006952	1272	28	14	0.5	-1	Z
SJC_S006959	1625	6.1	3	0.491803278688525	-1.02384674195437	Z
SJC_S006966	1006	4	1.1	0.275	-1.86249647625006	Z
SJC_S006970	1228	27	15	0.555555555555556	-0.84799690655495	Z
SJC_S006977	2878	31	11	0.354838709677419	-1.49476469174958	Z
SJC_S006991	1986	8.1	3.4	0.419753086419753	-1.25238716163429	Z
SJC_S007000	1620	42	23	0.547619047619048	-0.868755466721747	Z
SJC_S007005	2478	8.6	3.3	0.383720930232558	-1.38187063534364	Z
SJC_S007007	1796	18	5.3	0.294444444444444	-1.76393264176648	Z
SJC_S007022	3777	36	20	0.555555555555556	-0.84799690655495	Z
SJC_S007059	11947	31	16	0.516129032258065	-0.954196310386875	Z
SJC_S007066	10819	27	13	0.481481481481481	-1.05444778402238	Z
SJC_S007075	8698	34	16	0.470588235294118	-1.08746284125034	Z
SJC_S007077	4431	29	16	0.551724137931034	-0.857980995127572	Z
SJC_S007088	8552	27	14	0.518518518518518	-0.947532580105864	Z
SJC_S007089	1312	27	14	0.518518518518518	-0.947532580105864	Z
SJC_S007098	1844	24	13	0.541666666666667	-0.884522782580064	Z
SJC_S007100	1776	24	12	0.5	-1	Z
SJC_S007125	3756	38	20	0.526315789473684	-0.925999418556223	Z
SJC_S007132	2612	36	18	0.5	-1	Z
SJC_S007170	2996	40	16	0.4	-1.32192809488736	Z
SJC_S007174	1281	33	17	0.515151515151515	-0.956931278108114	Z
SJC_S007186	1167	33	15	0.454545454545455	-1.13750352374993	Z
SJC_S007187	1017	33	14	0.424242424242424	-1.23703919730085	Z
SJC_S007193	1674	33	16	0.484848484848485	-1.04439411935845	Z
SJC_S007194	2736	35	15	0.428571428571429	-1.22239242133645	Z
SJC_S007200	1597	29	12	0.413793103448276	-1.27301849440642	Z
SJC_S007203	3680	31	15	0.483870967741935	-1.04730571477836	Z
SJC_S007206	1205	37	18	0.486486486486487	-1.03952836418664	Z
SJC_S007219	1764	29	15	0.517241379310345	-0.951090399519053	Z
SJC_S007228	1935	33	17	0.515151515151515	-0.956931278108114	Z
SJC_S007229	7205	32	13	0.40625	-1.29956028185891	Z
SJC_S007234	1388	32	15	0.46875	-1.09310940439148	Z
SJC_S007237	5980	32	12	0.375	-1.41503749927884	Z
SJC_S007240	1174	32	15	0.46875	-1.09310940439148	Z
SJC_S007241	1152	31	12	0.387096774193548	-1.36923380966572	Z
SJC_S007244	1683	35	16	0.457142857142857	-1.12928301694497	Z
SJC_S007255	7940	31	14	0.451612903225806	-1.14684138832927	Z
SJC_S007270	7124	35	17	0.485714285714286	-1.04182017569463	Z
SJC_S007273	10553	33	14	0.424242424242424	-1.23703919730085	Z
SJC_S007278	1159	30	12	0.4	-1.32192809488736	Z
SJC_S007280	3979	36	15	0.416666666666667	-1.26303440583379	Z
SJC_S007288	3184	32	11	0.34375	-1.5405683813627	Z
SJC_S007289	2371	31	14	0.451612903225806	-1.14684138832927	Z
SJC_S007292	5411	32	16	0.5	-1	Z
SJC_S007294	1912	34	12	0.352941176470588	-1.50250034052918	Z
SJC_S007297	2581	21	5.9	0.280952380952381	-1.83160246830428	Z
SJC_S007300	2030	34	18	0.529411764705882	-0.917537839808027	Z
SJC_S007307	14133	32	14	0.4375	-1.1926450779424	Z
SJC_S007322	1075	660	140	0.212121212121212	-2.23703919730085	Z
SJC_S007334	9742	34	15	0.441176470588235	-1.18057224564182	Z
SJC_S007337	2501	23	10	0.434782608695652	-1.20163386116965	Z
SJC_S007351	2131	31	16	0.516129032258065	-0.954196310386875	Z
SJC_S007352	6521	31	16	0.516129032258065	-0.954196310386875	Z
SJC_S007353	1216	13	6.6	0.507692307692308	-0.977973693670001	Z
SJC_S007358	2472	24	9.3	0.3875	-1.36773178450049	Z
SJC_S007386	1438	27	12	0.444444444444444	-1.16992500144231	Z
SJC_S007421	8935	40	20	0.5	-1	Z
SJC_S007426	8211	33	14	0.424242424242424	-1.23703919730085	Z
SJC_S007431	4537	40	17	0.425	-1.23446525363702	Z
SJC_S007435	1210	28	14	0.5	-1	Z
SJC_S007439	2932	33	14	0.424242424242424	-1.23703919730085	Z
SJC_S007440	2134	30	10	0.333333333333333	-1.58496250072116	Z
SJC_S007461	8342	33	14	0.424242424242424	-1.23703919730085	Z
SJC_S007474	5951	39	19	0.487179487179487	-1.03747470541866	Z
SJC_S007481	1169	31	12	0.387096774193548	-1.36923380966572	Z
SJC_S007484	3770	61	30	0.491803278688525	-1.02384674195437	Z
SJC_S007493	2510	26	12	0.461538461538462	-1.11547721741994	Z
SJC_S007505	1413	32	15	0.46875	-1.09310940439148	Z
SJC_S007517	3680	32	16	0.5	-1	Z
SJC_S007519	1976	32	13	0.40625	-1.29956028185891	Z
SJC_S007526	1790	28	13	0.464285714285714	-1.10691520391651	Z
SJC_S007550	2491	26	12	0.461538461538462	-1.11547721741994	Z
SJC_S007556	1149	36	16	0.444444444444444	-1.16992500144231	Z
SJC_S007558	1778	31	14	0.451612903225806	-1.14684138832927	Z
SJC_S007565	13435	34	17	0.5	-1	Z
SJC_S007569	10526	35	16	0.457142857142857	-1.12928301694497	Z
SJC_S007570	3530	34	13	0.382352941176471	-1.38702312310925	Z
SJC_S007571	5573	36	18	0.5	-1	Z
SJC_S007577	2119	30	16	0.533333333333333	-0.906890595608519	Z
SJC_S007580	1267	30	13	0.433333333333333	-1.20645087746743	Z
SJC_S007583	1278	23	8.7	0.378260869565217	-1.40254655509565	Z
SJC_S007597	10901	33	17	0.515151515151515	-0.956931278108114	Z
SJC_S007600	17360	33	17	0.515151515151515	-0.956931278108114	Z
SJC_S007610	5482	35	15	0.428571428571429	-1.22239242133645	Z
SJC_S007614	13457	31	15	0.483870967741935	-1.04730571477836	Z
SJC_S007615	27273	32	13	0.40625	-1.29956028185891	Z
SJC_S007625	11438	32	14	0.4375	-1.1926450779424	Z
SJC_S007626	5087	32	12	0.375	-1.41503749927884	Z
SJC_S007637	6877	32	13	0.40625	-1.29956028185891	Z
SJC_S007641	1910	31	16	0.516129032258065	-0.954196310386875	Z
SJC_S007651	2466	74	32	0.432432432432432	-1.20945336562895	Z
SJC_S007655	5982	38	19	0.5	-1	Z
SJC_S007659	3499	28	12	0.428571428571429	-1.22239242133645	Z
SJC_S007660	1246	44	15	0.340909090909091	-1.55254102302878	Z
SJC_S007666	9257	32	13	0.40625	-1.29956028185891	Z
SJC_S007678	11185	31	16	0.516129032258065	-0.954196310386875	Z
SJC_S007684	4727	32	16	0.5	-1	Z
SJC_S007689	8697	47	22	0.468085106382979	-1.09515723304034	Z
SJC_S007691	4697	28	14	0.5	-1	Z
SJC_S007693	3849	62	28	0.451612903225806	-1.14684138832927	Z
SJC_S007704	18972	34	17	0.5	-1	Z
SJC_S007710	30521	32	15	0.46875	-1.09310940439148	Z
SJC_S007725	23128	32	16	0.5	-1	Z
SJC_S007742	23725	34	16	0.470588235294118	-1.08746284125034	Z
SJC_S007754	13304	20	8.4	0.42	-1.25153876699596	Z
SJC_S007756	14007	30	16	0.533333333333333	-0.906890595608519	Z
SJC_S007765	13782	18	7.3	0.405555555555556	-1.30202853744966	Z
SJC_S007766	23715	27	13	0.481481481481481	-1.05444778402238	Z
SJC_S007776	15495	7.4	1.2	0.162162162162162	-2.62449086490779	Z
SJC_S007780	14267	15	8.3	0.553333333333333	-0.853779259148956	Z
SJC_S007788	9012	22	12	0.545454545454545	-0.874469117916141	Z
SJC_S007794	2663	37	20	0.540540540540541	-0.887525270741587	Z
SJC_S007798	10939	36	18	0.5	-1	Z
SJC_S007799	11323	35	14	0.4	-1.32192809488736	Z
SJC_S007801	25745	37	19	0.513513513513513	-0.961525852185364	Z
SJC_S007812	18982	49	25	0.510204081632653	-0.970853654340484	Z
SJC_S007836	9184	6.6	2.3	0.348484848484848	-1.52083216330144	Z
SJC_S007852	10143	23	12	0.521739130434783	-0.938599455335857	Z
SJC_S007856	18849	45	22	0.488888888888889	-1.03242147769238	Z
SJC_S007857	17201	30	16	0.533333333333333	-0.906890595608519	Z
SJC_S007859	10652	37	18	0.486486486486487	-1.03952836418664	Z
SJC_S007860	13581	34	15	0.441176470588235	-1.18057224564182	Z
SJC_S007875	13686	9.1	4.8	0.527472527472527	-0.92283213947754	Z
SJC_S007885	7290	60	27	0.45	-1.15200309344505	Z
SJC_S007913	8972	10	3.8	0.38	-1.39592867633114	Z
SJC_S007915	6352	29	16	0.551724137931034	-0.857980995127572	Z
SJC_S007925	8266	45	21	0.466666666666667	-1.09953567355091	Z
SJC_S007930	12211	29	13	0.448275862068966	-1.15754127698648	Z
SJC_S007934	5455	38	19	0.5	-1	Z
SJC_S007938	7824	31	14	0.451612903225806	-1.14684138832927	Z
SJC_S007946	14315	31	15	0.483870967741935	-1.04730571477836	Z
SJC_S007947	7552	33	17	0.515151515151515	-0.956931278108114	Z
SJC_S007948	15661	32	15	0.46875	-1.09310940439148	Z
SJC_S007950	12524	33	16	0.484848484848485	-1.04439411935845	Z
SJC_S007954	19097	29	15	0.517241379310345	-0.951090399519053	Z
SJC_S007956	28243	32	14	0.4375	-1.1926450779424	Z
SJC_S007963	11436	34	15	0.441176470588235	-1.18057224564182	Z
SJC_S007974	7859	19	9.8	0.515789473684211	-0.955145764215739	Z
SJC_S007979	17064	21	11	0.523809523809524	-0.932885804141463	Z
SJC_S007984	7888	24	10	0.416666666666667	-1.26303440583379	Z
SJC_S007997	3929	34	17	0.5	-1	Z
SJC_S008000	9688	91	33	0.362637362637363	-1.46340052084024	Z
SJC_S008002	5590	12	6	0.5	-1	Z
SJC_S008004	8994	11	1.7	0.154545454545455	-2.69389687227432	Z
SJC_S008008	8829	31	14	0.451612903225806	-1.14684138832927	Z
SJC_S008019	6846	14	1.9	0.135714285714286	-2.88135550350138	Z
SJC_S008025	4284	3.2	1.5	0.46875	-1.09310940439148	Z
SJC_S008034	3159	17	4.5	0.264705882352941	-1.91753783980803	Z
SJC_S008035	3315	39	20	0.512820512820513	-0.963474123974886	Z
SJC_S008053	4442	10	3.6	0.36	-1.47393118833241	Z
SJC_S008062	4890	35	15	0.428571428571429	-1.22239242133645	Z
SJC_S008069	6991	35	17	0.485714285714286	-1.04182017569463	Z
SJC_S008078	6593	38	16	0.421052631578947	-1.24792751344359	Z
SJC_S008114	23155	33	16	0.484848484848485	-1.04439411935845	Z
SJC_S008126	4560	68	29	0.426470588235294	-1.22948184612277	Z
SJC_S008133	24675	30	14	0.466666666666667	-1.09953567355091	Z
SJC_S008134	13613	36	17	0.472222222222222	-1.08246216019197	Z
SJC_S008136	13025	24	12	0.5	-1	Z
SJC_S008138	23287	29	15	0.517241379310345	-0.951090399519053	Z
SJC_S008139	14365	36	18	0.5	-1	Z
SJC_S008140	23310	38	19	0.5	-1	Z
SJC_S008141	14265	37	18	0.486486486486487	-1.03952836418664	Z
SJC_S008144	8742	35	18	0.514285714285714	-0.959358015502654	Z
SJC_S008151	6934	9.8	5.2	0.530612244897959	-0.914270125974116	Z
SJC_S008169	11430	39	19	0.487179487179487	-1.03747470541866	Z
SJC_S008189	7442	40	18	0.45	-1.15200309344505	Z
SJC_S008206	2928	29	16	0.551724137931034	-0.857980995127572	Z
SJC_S008207	2531	27	13	0.481481481481481	-1.05444778402238	Z
SJC_S008223	1047	35	14	0.4	-1.32192809488736	Z
SJC_S008225	3250	26	11	0.423076923076923	-1.24100809950379	Z
SJC_S008227	1460	18	8.6	0.477777777777778	-1.06558834162758	Z
SJC_S008228	5943	36	14	0.388888888888889	-1.36257007938471	Z
SJC_S008230	1216	11	5.4	0.490909090909091	-1.02647221136119	Z
SJC_S008231	2304	20	6.7	0.335	-1.57776699931695	Z
SJC_S008237	2207	3.2	1.7	0.53125	-0.912537158749661	Z
SJC_S008244	15333	34	17	0.5	-1	Z
SJC_S008249	13168	33	17	0.515151515151515	-0.956931278108114	Z
SJC_S008260	3072	38	20	0.526315789473684	-0.925999418556223	Z
SJC_S008273	3308	31	14	0.451612903225806	-1.14684138832927	Z
SJC_S008274	4823	32	14	0.4375	-1.1926450779424	Z
SJC_S008300	1428	5	2	0.4	-1.32192809488736	Z
SJC_S008302	2404	16	7.8	0.4875	-1.03652587602511	Z
SJC_S008305	1364	5.8	1.2	0.206896551724138	-2.27301849440642	Z
SJC_S008309	10276	35	15	0.428571428571429	-1.22239242133645	Z
SJC_S008312	1906	26	14	0.538461538461538	-0.893084796083488	Z
SJC_S008313	1057	7.9	4.1	0.518987341772152	-0.94622874355902	Z
SJC_S008316	14079	33	15	0.454545454545455	-1.13750352374993	Z
SJC_S008319	9066	36	18	0.5	-1	Z
SJC_S008321	6655	34	14	0.411764705882353	-1.28010791919274	Z
SJC_S008343	13402	35	17	0.485714285714286	-1.04182017569463	Z
SJC_S008344	8861	32	14	0.4375	-1.1926450779424	Z
SJC_S008350	1458	67	36	0.537313432835821	-0.89616418901546	Z
SJC_S008353	3141	33	13	0.393939393939394	-1.34395440121736	Z
SJC_S008354	4023	100	33	0.33	-1.59946207041627	Z
SJC_S008363	2387	33	15	0.454545454545455	-1.13750352374993	Z
SJC_S008366	3247	26	10	0.384615384615385	-1.37851162325373	Z
SJC_S008368	5741	25	10	0.4	-1.32192809488736	Z
SJC_S008370	3256	29	13	0.448275862068966	-1.15754127698648	Z
SJC_S008371	2103	38	17	0.447368421052632	-1.16046467219325	Z
SJC_S008378	8523	31	15	0.483870967741935	-1.04730571477836	Z
SJC_S008381	7669	36	19	0.527777777777778	-0.921997487998727	Z
SJC_S008390	2576	27	11	0.407407407407407	-1.29545588352617	Z
SJC_S008407	2769	34	13	0.382352941176471	-1.38702312310925	Z
SJC_S008415	3595	38	16	0.421052631578947	-1.24792751344359	Z
SJC_S008420	4650	31	15	0.483870967741935	-1.04730571477836	Z
SJC_S008428	17095	32	13	0.40625	-1.29956028185891	Z
SJC_S008429	2279	33	14	0.424242424242424	-1.23703919730085	Z
SJC_S008430	7343	29	13	0.448275862068966	-1.15754127698648	Z
SJC_S008437	13865	38	21	0.552631578947368	-0.855610090664825	Z
SJC_S008446	17940	7	2.6	0.371428571428571	-1.42884329880387	Z
SJC_S008452	22792	37	19	0.513513513513513	-0.961525852185364	Z
SJC_S008462	26826	35	18	0.514285714285714	-0.959358015502654	Z
SJC_S008469	27325	34	15	0.441176470588235	-1.18057224564182	Z
SJC_S008470	22636	34	16	0.470588235294118	-1.08746284125034	Z
SJC_S008479	13061	48	25	0.520833333333333	-0.941106310946431	Z
SJC_S008506	12509	30	15	0.5	-1	Z
SJC_S008512	9568	32	14	0.4375	-1.1926450779424	Z
SJC_S008514	9813	32	14	0.4375	-1.1926450779424	Z
SJC_S008518	14851	33	17	0.515151515151515	-0.956931278108114	Z
SJC_S008529	13883	22	7.4	0.336363636363636	-1.57190634789571	Z
SJC_S008530	9472	32	13	0.40625	-1.29956028185891	Z
SJC_S008534	6369	30	15	0.5	-1	Z
SJC_S008536	15788	36	20	0.555555555555556	-0.84799690655495	Z
SJC_S008546	19157	37	19	0.513513513513513	-0.961525852185364	Z
SJC_S008551	21350	36	18	0.5	-1	Z
SJC_S008552	8022	22	11	0.5	-1	Z
SJC_S008553	14819	40	17	0.425	-1.23446525363702	Z
SJC_S008560	9989	11	4	0.363636363636364	-1.4594316186373	Z
SJC_S008597	9571	8.8	4.6	0.522727272727273	-0.935869662580285	Z
SJC_S008637	4787	2.6	1.4	0.538461538461538	-0.893084796083488	Z
SJC_S008660	3783	29	12	0.413793103448276	-1.27301849440642	Z
SJC_S008669	7851	21	9.7	0.461904761904762	-1.114332675479	Z
SJC_S008670	1808	23	12	0.521739130434783	-0.938599455335857	Z
SJC_S008692	7327	28	14	0.5	-1	Z
SJC_S008707	21103	31	16	0.516129032258065	-0.954196310386875	Z
SJC_S008710	10722	33	15	0.454545454545455	-1.13750352374993	Z
SJC_S008719	19270	33	16	0.484848484848485	-1.04439411935845	Z
SJC_S008722	8094	36	17	0.472222222222222	-1.08246216019197	Z
SJC_S008726	7999	35	16	0.457142857142857	-1.12928301694497	Z
SJC_S008728	18453	34	16	0.470588235294118	-1.08746284125034	Z
SJC_S008733	39282	33	16	0.484848484848485	-1.04439411935845	Z
SJC_S008734	26019	37	18	0.486486486486487	-1.03952836418664	Z
SJC_S008742	10183	37	20	0.540540540540541	-0.887525270741587	Z
SJC_S008750	2437	5.4	2	0.37037037037037	-1.43295940727611	Z
SJC_S008769	12979	32	14	0.4375	-1.1926450779424	Z
SJC_S008787	1214	6.6	3.3	0.5	-1	Z
SJC_S008792	2924	5.2	2.2	0.423076923076923	-1.24100809950379	Z
SJC_S008802	5408	31	16	0.516129032258065	-0.954196310386875	Z
SJC_S008813	4839	19	9.8	0.515789473684211	-0.955145764215739	Z
SJC_S008815	3931	22	12	0.545454545454545	-0.874469117916141	Z
SJC_S008816	3739	25	10	0.4	-1.32192809488736	Z
SJC_S008819	17738	32	16	0.5	-1	Z
SJC_S008820	10843	34	15	0.441176470588235	-1.18057224564182	Z
SJC_S008825	6625	15	6.9	0.46	-1.12029423371771	Z
SJC_S008832	1304	6.2	1.4	0.225806451612903	-2.14684138832927	Z
SJC_S008845	2055	5.4	2.5	0.462962962962963	-1.11103131238874	Z
SJC_S008855	1630	24	11	0.458333333333333	-1.12553088208386	Z
SJC_S008858	3101	4.2	2.3	0.547619047619048	-0.868755466721748	Z
SJC_S008873	1326	16	1.4	0.0875	-3.51457317282976	Z
SJC_S008891	2649	10	2.8	0.28	-1.83650126771712	Z
SJC_S008916	5881	10	4.5	0.45	-1.15200309344505	Z
SJC_S008924	1053	14	4.6	0.328571428571429	-1.60572106088795	Z
SJC_S008927	2381	19	7.2	0.378947368421053	-1.39993060688864	Z
SJC_S008943	2547	11	4.7	0.427272727272727	-1.22677086184702	Z
SJC_S008951	3892	26	14	0.538461538461538	-0.893084796083488	Z
SJC_S008960	1854	20	7	0.35	-1.51457317282976	Z
SJC_S008966	1061	13	6.3	0.484615384615385	-1.04508788952854	Z
SJC_S008967	2083	34	18	0.529411764705882	-0.917537839808027	Z
SJC_S008992	9737	29	13	0.448275862068966	-1.15754127698648	Z
SJC_S008993	11293	34	16	0.470588235294118	-1.08746284125034	Z
SJC_S009006	4633	33	16	0.484848484848485	-1.04439411935845	Z
SJC_S009018	5758	42	17	0.404761904761905	-1.30485458152842	Z
SJC_S009036	18332	31	14	0.451612903225806	-1.14684138832927	Z
SJC_S009069	13182	30	16	0.533333333333333	-0.906890595608519	Z
SJC_S009076	3188	24	13	0.541666666666667	-0.884522782580064	Z
SJC_S009081	4185	18	7.7	0.427777777777778	-1.22506655563477	Z
SJC_S009085	2346	7.7	1.9	0.246753246753247	-2.01885902725132	Z
SJC_S009097	3358	66	32	0.484848484848485	-1.04439411935845	Z
SJC_S009112	3745	35	16	0.457142857142857	-1.12928301694497	Z
SJC_S009116	1494	4.3	2.2	0.511627906976744	-0.966833136064801	Z
SJC_S009144	3294	4.5	2.2	0.488888888888889	-1.03242147769238	Z
SJC_S009145	3589	24	11	0.458333333333333	-1.12553088208386	Z
SJC_S009155	1368	31	9.2	0.296774193548387	-1.75256244921722	Z
SJC_S009162	5323	23	9.4	0.408695652173913	-1.29090119926674	Z
SJC_S009175	2021	7.2	1.4	0.194444444444444	-2.36257007938471	Z
SJC_S009190	2044	42	20	0.476190476190476	-1.0703893278914	Z
SJC_S009193	2399	7.6	3.9	0.513157894736842	-0.962525294581337	Z
SJC_S009197	4608	8.1	4.1	0.506172839506173	-0.982297998266541	Z
SJC_S009203	11393	25	12	0.48	-1.05889368905357	Z
SJC_S009218	4472	61	28	0.459016393442623	-1.12338241550528	Z
SJC_S009219	5501	28	3.7	0.132142857142857	-2.91982965131602	Z
SJC_S009241	1843	11	5.1	0.463636363636364	-1.10893437155316	Z
SJC_S009265	3397	13	7.2	0.553846153846154	-0.852442811586142	Z
SJC_S009291	3542	4.7	2.4	0.51063829787234	-0.969626350956481	Z
SJC_S009297	1329	8	2.6	0.325	-1.62148837674627	Z
SJC_S009299	4386	26	12	0.461538461538462	-1.11547721741994	Z
SJC_S009304	4089	21	9.5	0.452380952380952	-1.14438990933517	Z
SJC_S009308	1058	11	5.9	0.536363636363636	-0.898716664162818	Z
SJC_S009318	1218	45	18	0.4	-1.32192809488736	Z
SJC_S009327	1410	9.6	2.6	0.270833333333333	-1.88452278258006	Z
SJC_S009349	1396	18	5.5	0.305555555555556	-1.71049338280502	Z
SJC_S009360	3403	8.4	2.4	0.285714285714286	-1.8073549220576	Z
SJC_S009367	7293	27	11	0.407407407407407	-1.29545588352617	Z
SJC_S009384	2555	12	3.9	0.325	-1.62148837674627	Z
SJC_S009391	1436	5	2.6	0.52	-0.943416471633633	Z
SJC_S009393	1594	13	2.6	0.2	-2.32192809488736	Z
SJC_S009394	5308	36	18	0.5	-1	Z
SJC_S009410	11498	31	16	0.516129032258065	-0.954196310386875	Z
SJC_S009414	1327	29	15	0.517241379310345	-0.951090399519053	Z
SJC_S009417	3016	86	48	0.558139534883721	-0.841302253980942	Z
SJC_S009423	7616	32	15	0.46875	-1.09310940439148	Z
SJC_S009425	2521	11	3.8	0.345454545454545	-1.53343220008107	Z
SJC_S009445	6522	22	12	0.545454545454545	-0.874469117916141	Z
SJC_S009450	2285	6.7	3.7	0.552238805970149	-0.856635824828823	Z
SJC_S009465	2092	4.4	2	0.454545454545455	-1.13750352374993	Z
SJC_S009468	3153	22	11	0.5	-1	Z
SJC_S009470	2835	12	3.8	0.316666666666667	-1.65896308216493	Z
SJC_S009478	1230	17	8.4	0.494117647058824	-1.01707351335894	Z
SJC_S009480	1949	19	8.7	0.457894736842105	-1.12691211248222	Z
SJC_S009516	1426	12	2	0.166666666666667	-2.58496250072116	Z
SJC_S009533	2835	27	11	0.407407407407407	-1.29545588352617	Z
SJC_S009552	3154	65	31	0.476923076923077	-1.06817150264158	Z
SJC_S009556	2229	29	14	0.482758620689655	-1.05062607306997	Z
SJC_S009564	1462	11	5.2	0.472727272727273	-1.08091999538357	Z
SJC_S009587	1370	31	12	0.387096774193548	-1.36923380966572	Z
SJC_S009610	1590	50	22	0.44	-1.18442457113743	Z
SJC_S009617	2050	11	3.8	0.345454545454545	-1.53343220008107	Z
SJC_S009629	2881	39	19	0.487179487179487	-1.03747470541866	Z
SJC_S009634	3090	5.8	3.1	0.53448275862069	-0.903784684740697	Z
SJC_S009636	1202	16	6.9	0.43125	-1.21340363810919	Z
SJC_S009647	2076	32	14	0.4375	-1.1926450779424	Z
SJC_S009651	1087	29	13	0.448275862068966	-1.15754127698648	Z
SJC_S009671	1374	9.1	3.5	0.384615384615385	-1.37851162325373	Z
SJC_S009673	9392	34	16	0.470588235294118	-1.08746284125034	Z
SJC_S009684	1521	12	4.7	0.391666666666667	-1.35230174393088	Z
SJC_S009722	3510	15	2	0.133333333333333	-2.90689059560852	Z
SJC_S009787	3285	13	6.8	0.523076923076923	-0.934904971778115	Z
SJC_S009815	1367	13	1.4	0.107692307692308	-3.21501289097085	Z
SJC_S009832	3405	22	11	0.5	-1	Z
SJC_S009833	1509	25	13	0.52	-0.943416471633633	Z
SJC_S009840	7183	29	15	0.517241379310345	-0.951090399519053	Z
SJC_S009849	1379	6.8	1.8	0.264705882352941	-1.91753783980803	Z
SJC_S009866	1610	13	5.9	0.453846153846154	-1.13972476366661	Z
SJC_S009877	3519	30	12	0.4	-1.32192809488736	Z
SJC_S009904	2523	12	4.4	0.366666666666667	-1.44745897697122	Z
SJC_S009905	6287	11	5.4	0.490909090909091	-1.02647221136119	Z
SJC_S009930	3103	9.3	3.8	0.408602150537634	-1.29123129766445	Z
SJC_S009937	2659	18	8.2	0.455555555555555	-1.13430109171159	Z
SJC_S009947	1244	13	5.1	0.392307692307692	-1.34994247105696	Z
SJC_S009953	2461	11	6.1	0.554545454545455	-0.850622375961773	Z
SJC_S009966	6700	8.7	4.8	0.551724137931034	-0.857980995127572	Z
SJC_S009968	8826	4.3	1.3	0.302325581395349	-1.72582503656101	Z
SJC_S009974	12219	29	14	0.482758620689655	-1.05062607306997	Z
SJC_S009978	4352	24	9.5	0.395833333333333	-1.33703498727757	Z
SJC_S009986	1697	33	14	0.424242424242424	-1.23703919730085	Z
SJC_S009995	2723	36	13	0.361111111111111	-1.46948528330122	Z
SJC_S010007	1888	38	18	0.473684210526316	-1.07800251200127	Z
SJC_S010010	1164	27	13	0.481481481481481	-1.05444778402238	Z
SJC_S010013	6902	35	14	0.4	-1.32192809488736	Z
SJC_S010026	6594	16	1.7	0.10625	-3.23446525363702	Z
SJC_S010027	3313	38	15	0.394736842105263	-1.34103691783507	Z
SJC_S010034	10215	34	16	0.470588235294118	-1.08746284125034	Z
SJC_S010044	3206	32	12	0.375	-1.41503749927884	Z
SJC_S010050	1788	27	15	0.555555555555556	-0.84799690655495	Z
SJC_S010054	2335	38	15	0.394736842105263	-1.34103691783507	Z
SJC_S010061	5179	29	12	0.413793103448276	-1.27301849440642	Z
SJC_S010063	7551	32	17	0.53125	-0.912537158749661	Z
SJC_S010067	6344	30	14	0.466666666666667	-1.09953567355091	Z
SJC_S010074	6142	29	14	0.482758620689655	-1.05062607306997	Z
SJC_S010084	1878	36	16	0.444444444444444	-1.16992500144231	Z
SJC_S010093	3976	18	9.3	0.516666666666667	-0.952694285221643	Z
SJC_S010094	2858	23	12	0.521739130434783	-0.938599455335857	Z
SJC_S010096	9976	43	20	0.465116279069767	-1.10433665981474	Z
SJC_S010103	24340	31	17	0.548387096774194	-0.866733469136536	Z
SJC_S010106	7305	35	18	0.514285714285714	-0.959358015502654	Z
SJC_S010107	8872	29	12	0.413793103448276	-1.27301849440642	Z
SJC_S010109	7023	31	15	0.483870967741935	-1.04730571477836	Z
SJC_S010120	5922	30	16	0.533333333333333	-0.906890595608519	Z
SJC_S010172	2300	12	4.6	0.383333333333333	-1.38332863955151	Z
SJC_S010179	6741	14	6.7	0.478571428571429	-1.06319382648719	Z
SJC_S010192	3792	40	19	0.475	-1.07400058144378	Z
SJC_S010220	3879	32	17	0.53125	-0.912537158749661	Z
SJC_S010221	3420	21	9.9	0.471428571428571	-1.08488889758651	Z
SJC_S010229	1475	36	15	0.416666666666667	-1.26303440583379	Z
SJC_S010259	1956	12	6.6	0.55	-0.862496476250065	Z
SJC_S010278	2133	18	3.8	0.211111111111111	-2.24392558288609	Z
SJC_S010282	4596	9.7	4.7	0.484536082474227	-1.04532399050949	Z
SJC_S010287	1663	20	11	0.55	-0.862496476250065	Z
SJC_S010288	2731	3	1.4	0.466666666666667	-1.09953567355091	Z
SJC_S010290	2236	12	6	0.5	-1	Z
SJC_S010292	1469	3	1.3	0.433333333333333	-1.20645087746743	Z
SJC_S010332	2120	13	5.9	0.453846153846154	-1.13972476366661	Z
SJC_S010345	1399	11	4.9	0.445454545454545	-1.16664986940945	Z
SJC_S010349	1303	21	11	0.523809523809524	-0.932885804141463	Z
SJC_S010350	2245	3.6	1.9	0.527777777777778	-0.921997487998727	Z
SJC_S010369	1282	12	5.2	0.433333333333333	-1.20645087746743	Z
SJC_S010373	1705	6.3	3.4	0.53968253968254	-0.889817082249577	Z
SJC_S010385	1861	5.4	3	0.555555555555555	-0.84799690655495	Z
SJC_S010396	2329	21	5	0.238095238095238	-2.0703893278914	Z
SJC_S010401	1472	30	9	0.3	-1.73696559416621	Z
SJC_S010407	1039	24	4.9	0.204166666666667	-2.29218075149331	Z
SJC_S010419	2869	60	32	0.533333333333333	-0.906890595608519	Z
SJC_S010424	2203	38	19	0.5	-1	Z
SJC_S010432	4034	11	5	0.454545454545455	-1.13750352374993	Z
SJC_S010436	2074	8.4	4.6	0.547619047619048	-0.868755466721748	Z
SJC_S010452	2016	30	16	0.533333333333333	-0.906890595608519	Z
SJC_S010457	2443	5.1	2.7	0.529411764705882	-0.917537839808027	Z
SJC_S010479	1938	42	19	0.452380952380952	-1.14438990933517	Z
SJC_S010514	2936	8	2.9	0.3625	-1.46394709975979	Z
SJC_S010520	1084	13	5.5	0.423076923076923	-1.24100809950379	Z
SJC_S010544	1361	26	9.7	0.373076923076923	-1.42245497084133	Z
SJC_S010546	2062	12	1.6	0.133333333333333	-2.90689059560852	Z
SJC_S010548	1166	13	6.3	0.484615384615385	-1.04508788952854	Z
SJC_S010558	3070	22	12	0.545454545454545	-0.874469117916141	Z
SJC_S010581	1322	22	8.5	0.386363636363636	-1.37196877738696	Z
SJC_S010594	2987	12	5.5	0.458333333333333	-1.12553088208386	Z
SJC_S010601	2509	11	3.2	0.290909090909091	-1.78135971352466	Z
SJC_S010615	3434	11	4.2	0.381818181818182	-1.3890422907459	Z
SJC_S010639	5374	25	9.6	0.384	-1.38082178394093	Z
SJC_S010644	2092	18	8.8	0.488888888888889	-1.03242147769238	Z
SJC_S010652	1646	16	5.6	0.35	-1.51457317282976	Z
SJC_S010654	1423	14	4.9	0.35	-1.51457317282976	Z
SJC_S010659	1407	6.7	3.5	0.522388059701492	-0.936806173512806	Z
SJC_S010660	3830	5.4	2.3	0.425925925925926	-1.23132554610646	Z
SJC_S010668	1063	11	5.9	0.536363636363636	-0.898716664162818	Z
SJC_S010671	1300	4.9	2	0.408163265306122	-1.29278174922785	Z
SJC_S010675	2615	7.6	1.4	0.184210526315789	-2.44057259138598	Z
SJC_S010683	4060	22	10	0.454545454545455	-1.13750352374993	Z
SJC_S010685	1593	15	3.9	0.26	-1.94341647163363	Z
SJC_S010693	2012	35	16	0.457142857142857	-1.12928301694497	Z
SJC_S010696	1149	4.5	2.3	0.511111111111111	-0.968291140272662	Z
SJC_S010703	1908	17	4.2	0.247058823529412	-2.01707351335894	Z
SJC_S010724	2609	15	8.2	0.546666666666667	-0.871266685877797	Z
SJC_S010734	1141	4	2	0.5	-1	Z
SJC_S010738	1380	20	5.9	0.295	-1.76121314041288	Z
SJC_S010744	1271	7.9	1.9	0.240506329113924	-2.05585323473352	Z
SJC_S010752	1495	34	15	0.441176470588235	-1.18057224564182	Z
SJC_S010771	1147	15	2	0.133333333333333	-2.90689059560852	Z
SJC_S010778	3496	14	6.5	0.464285714285714	-1.10691520391651	Z
SJC_S010789	1475	3.9	2	0.512820512820513	-0.963474123974886	Z
SJC_S010808	1492	36	20	0.555555555555556	-0.84799690655495	Z
SJC_S010833	1590	11	5.2	0.472727272727273	-1.08091999538357	Z
SJC_S010837	1206	24	13	0.541666666666667	-0.884522782580064	Z
SJC_S010847	2257	33	1.6	0.0484848484848485	-4.36632221424582	Z
SJC_S010860	3267	35	15	0.428571428571429	-1.22239242133645	Z
SJC_S010879	3537	37	17	0.459459459459459	-1.12199052437861	Z
SJC_S010884	1083	28	9.6	0.342857142857143	-1.54432051622381	Z
SJC_S010898	2851	34	15	0.441176470588235	-1.18057224564182	Z
SJC_S010902	3924	30	12	0.4	-1.32192809488736	Z
SJC_S010906	1329	13	7.1	0.546153846153846	-0.872620693523773	Z
SJC_S010911	1174	5.4	1.4	0.259259259259259	-1.94753258010586	Z
SJC_S010919	1503	9.7	1.7	0.175257731958763	-2.51245000093679	Z
SJC_S010972	1363	15	2.3	0.153333333333333	-2.70525673443887	Z
SJC_S011007	1214	43	22	0.511627906976744	-0.966833136064801	Z
SJC_S011008	1281	32	17	0.53125	-0.912537158749661	Z
SJC_S011020	1805	2	1.1	0.55	-0.862496476250065	Z
SJC_S011051	1987	230	98	0.426086956521739	-1.23078020682917	Z
SJC_S011079	1154	24	6.2	0.258333333333333	-1.95269428522164	Z
SJC_S011081	2324	27	13	0.481481481481481	-1.05444778402238	Z
SJC_S011091	1364	11	5.9	0.536363636363636	-0.898716664162818	Z
SJC_S011093	1574	25	13	0.52	-0.943416471633633	Z
SJC_S011101	1057	13	2.9	0.223076923076923	-2.16438681790088	Z
SJC_S011110	4346	8.9	4.4	0.49438202247191	-1.0163018123291	Z
SJC_S011115	5059	9	5	0.555555555555556	-0.84799690655495	Z
SJC_S011117	3017	35	16	0.457142857142857	-1.12928301694497	Z
SJC_S011125	1896	28	6.7	0.239285714285714	-2.06319382648719	Z
SJC_S011128	1738	14	5.5	0.392857142857143	-1.34792330342031	Z
SJC_S011143	11303	33	16	0.484848484848485	-1.04439411935845	Z
SJC_S011159	2408	13	4.4	0.338461538461538	-1.56293619439116	Z
SJC_S011171	1421	5.1	2.4	0.470588235294118	-1.08746284125034	Z
SJC_S011179	1242	20	3	0.15	-2.73696559416621	Z
SJC_S011182	2883	32	17	0.53125	-0.912537158749661	Z
SJC_S011186	1024	7.4	3	0.405405405405405	-1.30256277002043	Z
SJC_S011206	10878	15	6.5	0.433333333333333	-1.20645087746743	Z
SJC_S011213	1090	31	15	0.483870967741935	-1.04730571477836	Z
SJC_S011219	2888	24	12	0.5	-1	Z
SJC_S011229	2234	33	15	0.454545454545455	-1.13750352374993	Z
SJC_S011244	1250	23	4.7	0.204347826086957	-2.29090119926674	Z
SJC_S011246	1264	31	5.2	0.167741935483871	-2.57568468713315	Z
SJC_S011247	1495	28	13	0.464285714285714	-1.10691520391651	Z
SJC_S011262	1014	23	12	0.521739130434783	-0.938599455335857	Z
SJC_S011267	2240	27	15	0.555555555555556	-0.84799690655495	Z
SJC_S011300	1794	11	5.1	0.463636363636364	-1.10893437155316	Z
SJC_S011334	3445	38	18	0.473684210526316	-1.07800251200127	Z
SJC_S011347	2504	15	7.4	0.493333333333333	-1.01936532486693	Z
SJC_S011358	1395	36	10	0.277777777777778	-1.84799690655495	Z
SJC_S011362	1911	37	19	0.513513513513513	-0.961525852185364	Z
SJC_S011380	2040	5.3	2	0.377358490566038	-1.40599235967584	Z
SJC_S011383	2166	5.6	2	0.357142857142857	-1.48542682717024	Z
SJC_S011384	2429	3.4	1.8	0.529411764705882	-0.917537839808027	Z
SJC_S011387	1589	40	16	0.4	-1.32192809488736	Z
SJC_S011388	2866	11	3.9	0.354545454545455	-1.49595749466241	Z
SJC_S011401	1421	17	8.7	0.511764705882353	-0.966447440288974	Z
SJC_S011411	2445	24	13	0.541666666666667	-0.884522782580064	Z
SJC_S011412	3716	39	17	0.435897435897436	-1.19793937761191	Z
SJC_S011417	2133	31	13	0.419354838709677	-1.25375659224578	Z
SJC_S011445	1298	18	10	0.555555555555556	-0.84799690655495	Z
SJC_S011453	2742	2.9	1.5	0.517241379310345	-0.951090399519053	Z
SJC_S011458	2261	19	7.3	0.384210526315789	-1.38003104945093	Z
SJC_S011464	2905	9.5	3.5	0.368421052631579	-1.44057259138598	Z
SJC_S011475	1643	17	7.2	0.423529411764706	-1.23946593469539	Z
SJC_S011486	1456	14	6.6	0.471428571428571	-1.08488889758651	Z
SJC_S011516	2851	25	9.7	0.388	-1.36587144247496	Z
SJC_S011525	1242	14	4.5	0.321428571428571	-1.63742992061529	Z
SJC_S011529	1842	3.6	1.8	0.5	-1	Z
SJC_S011533	1275	19	7.3	0.384210526315789	-1.38003104945093	Z
SJC_S011553	2530	9	3.2	0.355555555555556	-1.49185309632967	Z
SJC_S011557	1028	27	14	0.518518518518518	-0.947532580105864	Z
SJC_S011573	1037	8	4.3	0.5375	-0.895663340185265	Z
SJC_S011583	2370	17	4.5	0.264705882352941	-1.91753783980803	Z
SJC_S011625	1774	10	5.2	0.52	-0.943416471633633	Z
SJC_S011660	1094	29	12	0.413793103448276	-1.27301849440642	Z
SJC_S011671	1612	18	8.8	0.488888888888889	-1.03242147769238	Z
SJC_S011675	3132	18	8.8	0.488888888888889	-1.03242147769238	Z
SJC_S011679	2347	7.8	2.8	0.358974358974359	-1.47804729680464	Z
SJC_S011702	1601	18	1.9	0.105555555555556	-3.24392558288609	Z
SJC_S011703	1397	18	8.1	0.45	-1.15200309344505	Z
SJC_S011708	1695	13	4.6	0.353846153846154	-1.49880585697144	Z
SJC_S011720	1339	8.3	4	0.481927710843373	-1.05311133645956	Z
SJC_S011729	1832	13	4.7	0.361538461538462	-1.46777896135082	Z
SJC_S011734	1748	6	1.8	0.3	-1.73696559416621	Z
SJC_S011749	1283	8.9	4.1	0.460674157303371	-1.11818142634831	Z
SJC_S011763	1043	36	16	0.444444444444444	-1.16992500144231	Z
SJC_S011776	1420	8.3	4.6	0.554216867469879	-0.851477475289912	Z
SJC_S011779	2025	33	15	0.454545454545455	-1.13750352374993	Z
SJC_S011783	1425	18	9.7	0.538888888888889	-0.891940254142547	Z
SJC_S011797	1211	16	6.2	0.3875	-1.36773178450049	Z
SJC_S011826	1239	5	2.3	0.46	-1.12029423371771	Z
SJC_S011836	1141	28	14	0.5	-1	Z
SJC_S011837	2692	2.6	1.3	0.5	-1	Z
SJC_S011842	1315	26	7.6	0.292307692307692	-1.77444029958487	Z
SJC_S011843	1463	23	9.8	0.426086956521739	-1.23078020682917	Z
SJC_S011863	2647	3.4	1.5	0.441176470588235	-1.18057224564182	Z
SJC_S011869	1040	10	5.5	0.55	-0.862496476250065	Z
SJC_S011878	1175	28	13	0.464285714285714	-1.10691520391651	Z
SJC_S011882	1230	3.2	1.4	0.4375	-1.1926450779424	Z
SJC_S011897	2511	10	4.5	0.45	-1.15200309344505	Z
SJC_S011907	1130	54	29	0.537037037037037	-0.896906507035896	Z
SJC_S011912	1086	29	15	0.517241379310345	-0.951090399519053	Z
SJC_S011921	2064	5.3	2.1	0.39622641509434	-1.33560303178444	Z
SJC_S011922	1828	8.5	4.3	0.505882352941176	-0.983126181435604	Z
SJC_S011940	2584	29	14	0.482758620689655	-1.05062607306997	Z
SJC_S011945	1196	13	4.6	0.353846153846154	-1.49880585697144	Z
SJC_S011948	2266	17	8	0.470588235294118	-1.08746284125034	Z
SJC_S011950	1538	35	16	0.457142857142857	-1.12928301694497	Z
SJC_S012014	5477	6	1.5	0.25	-2	Z
SJC_S012015	1201	16	6.8	0.425	-1.23446525363702	Z
SJC_S012027	2139	34	18	0.529411764705882	-0.917537839808027	Z
SJC_S012034	2978	36	18	0.5	-1	Z
SJC_S012039	5828	39	16	0.41025641025641	-1.28540221886225	Z
SJC_S012055	1228	5.4	2	0.37037037037037	-1.43295940727611	Z
SJC_S012059	1542	3.6	1.3	0.361111111111111	-1.46948528330122	Z
SJC_S012075	1031	7.7	1.3	0.168831168831169	-2.56634682255381	Z
SJC_S012089	2939	31	15	0.483870967741935	-1.04730571477836	Z
SJC_S012092	1568	5.1	2.3	0.450980392156863	-1.14886338591448	Z
SJC_S012097	1028	36	17	0.472222222222222	-1.08246216019197	Z
SJC_S012103	1270	11	4.2	0.381818181818182	-1.3890422907459	Z
SJC_S012105	1878	8.4	4.2	0.5	-1	Z
SJC_S012121	1642	19	7.1	0.373684210526316	-1.42010848882627	Z
SJC_S012133	4558	38	16	0.421052631578947	-1.24792751344359	Z
SJC_S012150	1236	7.1	2	0.28169014084507	-1.82781902461732	Z
SJC_S012152	1014	8.6	3.2	0.372093023255814	-1.4262647547021	Z
SJC_S012167	1161	9	4.4	0.488888888888889	-1.03242147769238	Z
SJC_S012178	1001	9.9	3.8	0.383838383838384	-1.38142910663602	Z
SJC_S012189	1424	27	6.6	0.244444444444444	-2.03242147769238	Z
SJC_S012199	1196	7.1	1.6	0.225352112676056	-2.14974711950468	Z
SJC_S012230	1550	13	6.6	0.507692307692308	-0.977973693670001	Z
SJC_S012239	4259	28	11	0.392857142857143	-1.34792330342031	Z
SJC_S012248	2146	5.8	1.1	0.189655172413793	-2.39854937649027	Z
SJC_S012271	1152	20	2.4	0.12	-3.05889368905357	Z
SJC_S012281	1380	16	8.5	0.53125	-0.912537158749661	Z
SJC_S012283	1539	38	19	0.5	-1	Z
SJC_S012288	2770	26	13	0.5	-1	Z
SJC_S012298	1108	4	2	0.5	-1	Z
SJC_S012301	1213	20	11	0.55	-0.862496476250065	Z
SJC_S012312	1664	9.9	3.1	0.313131313131313	-1.67516030969273	Z
SJC_S012314	1098	13	2.9	0.223076923076923	-2.16438681790088	Z
SJC_S012319	1140	9.3	3.4	0.365591397849462	-1.45169596985769	Z
SJC_S012322	2244	30	16	0.533333333333333	-0.906890595608519	Z
SJC_S012328	1212	7	2.2	0.314285714285714	-1.66985139830767	Z
SJC_S012336	1049	32	13	0.40625	-1.29956028185891	Z
SJC_S012343	1001	11	4.1	0.372727272727273	-1.42380770890658	Z
SJC_S012348	1270	10	4.6	0.46	-1.12029423371771	Z
SJC_S012352	1353	17	9.4	0.552941176470588	-0.854802084460064	Z
SJC_S012393	1354	18	9	0.5	-1	Z
SJC_S012398	1263	5.8	1.6	0.275862068965517	-1.85798099512757	Z
SJC_S012430	1511	25	6.6	0.264	-1.92139016530363	Z
SJC_S012433	1460	14	6.8	0.485714285714286	-1.04182017569463	Z
SJC_S012437	3134	23	9.9	0.430434782608696	-1.21613343086477	Z
SJC_S012442	1304	8.3	2.8	0.337349397590361	-1.56768450928932	Z
SJC_S012444	2989	17	8.9	0.523529411764706	-0.933657505171304	Z
SJC_S012457	1021	6.5	1.6	0.246153846153846	-2.02236781302845	Z
SJC_S012459	1103	15	6	0.4	-1.32192809488736	Z
SJC_S012479	1540	6.2	1.5	0.241935483870968	-2.04730571477836	Z
SJC_S012508	2828	30	15	0.5	-1	Z
SJC_S012535	2082	28	15	0.535714285714286	-0.900464326449086	Z
SJC_S012548	1370	15	5.8	0.386666666666667	-1.37083769536831	Z
SJC_S012549	1716	10	4.6	0.46	-1.12029423371771	Z
SJC_S012555	3258	47	24	0.51063829787234	-0.969626350956481	Z
SJC_S012568	2553	30	15	0.5	-1	Z
SJC_S012579	1310	6.4	3.4	0.53125	-0.912537158749661	Z
SJC_S012581	2272	16	6.3	0.39375	-1.34464817138745	Z
SJC_S012598	1415	9.9	2.5	0.252525252525253	-1.98550043030488	Z
SJC_S012602	1076	24	8.5	0.354166666666667	-1.49749965947082	Z
SJC_S012606	1571	32	15	0.46875	-1.09310940439148	Z
SJC_S012609	1209	23	10	0.434782608695652	-1.20163386116965	Z
SJC_S012645	1582	35	17	0.485714285714286	-1.04182017569463	Z
SJC_S012654	2331	4.8	1.9	0.395833333333333	-1.33703498727757	Z
SJC_S012657	1049	9.8	5.4	0.551020408163265	-0.85982234195174	Z
SJC_S012671	1331	6.3	2	0.317460317460317	-1.65535182861255	Z
SJC_S012673	3632	8.9	4.1	0.460674157303371	-1.11818142634831	Z
SJC_S012676	1380	18	10	0.555555555555556	-0.84799690655495	Z
SJC_S012680	1404	5.4	2.4	0.444444444444444	-1.16992500144231	Z
SJC_S012708	1041	24	9.2	0.383333333333333	-1.38332863955151	Z
SJC_S012726	1112	6.1	1.4	0.229508196721311	-2.12338241550528	Z
SJC_S012729	1600	17	5	0.294117647058824	-1.76553474636298	Z
SJC_S012730	1222	18	4.8	0.266666666666667	-1.90689059560852	Z
SJC_S012735	1429	34	15	0.441176470588235	-1.18057224564182	Z
SJC_S012736	2858	22	12	0.545454545454545	-0.874469117916141	Z
SJC_S012743	1248	21	11	0.523809523809524	-0.932885804141463	Z
SJC_S012773	2777	29	16	0.551724137931034	-0.857980995127572	Z
SJC_S012781	1269	2.8	1.3	0.464285714285714	-1.10691520391651	Z
SJC_S012784	5122	56	29	0.517857142857143	-0.949373926930032	Z
SJC_S012787	1401	32	15	0.46875	-1.09310940439148	Z
SJC_S012813	2844	18	10	0.555555555555556	-0.84799690655495	Z
SJC_S012826	1191	7.7	2.8	0.363636363636364	-1.4594316186373	Z
SJC_S012831	1052	15	6.7	0.446666666666667	-1.16272950003811	Z
SJC_S012835	1481	4	1.2	0.3	-1.73696559416621	Z
SJC_S012837	1399	8.2	2.9	0.353658536585366	-1.49957100949051	Z
SJC_S012870	2498	26	12	0.461538461538462	-1.11547721741994	Z
SJC_S012883	1597	30	15	0.5	-1	Z
SJC_S012885	1438	24	12	0.5	-1	Z
SJC_S012898	1186	14	7.3	0.521428571428571	-0.939458458064949	Z
SJC_S012902	1456	36	13	0.361111111111111	-1.46948528330122	Z
SJC_S012920	1406	32	14	0.4375	-1.1926450779424	Z
SJC_S012948	1575	34	14	0.411764705882353	-1.28010791919274	Z
SJC_S012958	6788	26	12	0.461538461538462	-1.11547721741994	Z
SJC_S012967	2590	20	7.5	0.375	-1.41503749927884	Z
SJC_S012975	1546	26	5.3	0.203846153846154	-2.29444735846526	Z
SJC_S013026	1745	24	11	0.458333333333333	-1.12553088208386	Z
SJC_S013032	1244	4.9	2.7	0.551020408163265	-0.85982234195174	Z
SJC_S013039	1297	27	13	0.481481481481481	-1.05444778402238	Z
SJC_S013049	1066	12	5.8	0.483333333333333	-1.04890960048095	Z
SJC_S013072	8171	26	14	0.538461538461538	-0.893084796083488	Z
SJC_S013077	2026	6	2.4	0.4	-1.32192809488736	Z
SJC_S013080	6663	32	17	0.53125	-0.912537158749661	Z
SJC_S013092	1513	31	11	0.354838709677419	-1.49476469174958	Z
SJC_S013096	4793	30	12	0.4	-1.32192809488736	Z
SJC_S013106	1408	30	13	0.433333333333333	-1.20645087746743	Z
SJC_S013146	1731	14	7.2	0.514285714285714	-0.959358015502654	Z
SJC_S013154	1149	22	12	0.545454545454545	-0.874469117916141	Z
SJC_S013159	2500	6.1	2.9	0.475409836065574	-1.07275634243531	Z
SJC_S013200	4226	31	15	0.483870967741935	-1.04730571477836	Z
SJC_S013204	1320	31	8.7	0.280645161290323	-1.83318090942551	Z
SJC_S013217	2213	17	1.4	0.0823529411764706	-3.6020360140801	Z
SJC_S013228	1583	12	3.4	0.283333333333333	-1.81942775435818	Z
SJC_S013240	2651	19	7	0.368421052631579	-1.44057259138598	Z
SJC_S013247	1233	13	1.4	0.107692307692308	-3.21501289097085	Z
SJC_S013285	1547	26	11	0.423076923076923	-1.24100809950379	Z
SJC_S013288	1578	11	2.6	0.236363636363636	-2.08091999538357	Z
SJC_S013299	1810	12	4.8	0.4	-1.32192809488736	Z
SJC_S013316	1243	24	8.3	0.345833333333333	-1.53185116426159	Z
SJC_S013317	1594	14	2.5	0.178571428571429	-2.48542682717024	Z
SJC_S013330	1594	2.4	1.2	0.5	-1	Z
SJC_S013341	2036	5.4	2.8	0.518518518518518	-0.947532580105864	Z
SJC_S013344	1496	4.4	1.4	0.318181818181818	-1.65207669657969	Z
SJC_S013365	1554	28	14	0.5	-1	Z
SJC_S013395	1623	16	4.7	0.29375	-1.76733924320973	Z
SJC_S013422	3515	37	18	0.486486486486487	-1.03952836418664	Z
SJC_S013437	6224	27	4.4	0.162962962962963	-2.61738397841353	Z
SJC_S013441	2142	12	6.6	0.55	-0.862496476250065	Z
SJC_S013442	1682	24	9.5	0.395833333333333	-1.33703498727757	Z
SJC_S013459	2501	4.2	1.7	0.404761904761905	-1.30485458152842	Z
SJC_S013473	2268	12	2.3	0.191666666666667	-2.38332863955151	Z
SJC_S013491	6391	13	2.8	0.215384615384615	-2.21501289097085	Z
SJC_S013515	5392	11	4.7	0.427272727272727	-1.22677086184702	Z
SJC_S013520	6316	22	11	0.5	-1	Z
SJC_S013533	1824	29	15	0.517241379310345	-0.951090399519053	Z
SJC_S013552	3196	30	16	0.533333333333333	-0.906890595608519	Z
SJC_S013596	2352	6.3	3.5	0.555555555555556	-0.84799690655495	Z
SJC_S013603	1459	11	2	0.181818181818182	-2.4594316186373	Z
SJC_S013620	3396	29	3.3	0.113793103448276	-3.13551497065648	Z
SJC_S013656	1361	32	12	0.375	-1.41503749927884	Z
SJC_S013664	2823	25	6.2	0.248	-2.01158797427521	Z
SJC_S013677	8151	8.6	4.8	0.558139534883721	-0.841302253980942	Z
SJC_S013678	4806	13	1.4	0.107692307692308	-3.21501289097085	Z
SJC_S013684	8464	23	12	0.521739130434783	-0.938599455335857	Z
SJC_S013685	6318	33	16	0.484848484848485	-1.04439411935845	Z
SJC_S013691	4739	33	16	0.484848484848485	-1.04439411935845	Z
SJC_S013699	3010	33	15	0.454545454545455	-1.13750352374993	Z
SJC_S013700	6898	20	10	0.5	-1	Z
SJC_S013702	1857	37	20	0.540540540540541	-0.887525270741587	Z
SJC_S013706	1144	17	9.2	0.541176470588235	-0.885828980080689	Z
SJC_S013712	3194	33	12	0.363636363636364	-1.4594316186373	Z
SJC_S013714	4554	35	15	0.428571428571429	-1.22239242133645	Z
SJC_S013715	10742	35	18	0.514285714285714	-0.959358015502654	Z
SJC_S013717	1747	38	16	0.421052631578947	-1.24792751344359	Z
SJC_S013725	3481	29	15	0.517241379310345	-0.951090399519053	Z
SJC_S013727	10620	30	16	0.533333333333333	-0.906890595608519	Z
SJC_S013728	7299	32	15	0.46875	-1.09310940439148	Z
SJC_S013763	1280	16	7.4	0.4625	-1.11247472925841	Z
SJC_S013774	4343	34	16	0.470588235294118	-1.08746284125034	Z
SJC_S013777	1882	31	16	0.516129032258065	-0.954196310386875	Z
SJC_S013782	1353	30	15	0.5	-1	Z
SJC_S013792	3626	38	19	0.5	-1	Z
SJC_S013802	1147	30	12	0.4	-1.32192809488736	Z
SJC_S013804	1057	31	11	0.354838709677419	-1.49476469174958	Z
SJC_S013821	4398	37	16	0.432432432432432	-1.20945336562895	Z
SJC_S013824	3462	33	17	0.515151515151515	-0.956931278108114	Z
SJC_S013827	2676	30	16	0.533333333333333	-0.906890595608519	Z
SJC_S013847	2919	27	12	0.444444444444444	-1.16992500144231	Z
SJC_S013856	1119	23	12	0.521739130434783	-0.938599455335857	Z
SJC_S013874	1061	29	15	0.517241379310345	-0.951090399519053	Z
SJC_S013875	1113	51	26	0.509803921568627	-0.971985623830404	Z
SJC_S013876	1420	35	15	0.428571428571429	-1.22239242133645	Z
SJC_S013884	1203	36	19	0.527777777777778	-0.921997487998727	Z
SJC_S013887	1034	22	6.1	0.277272727272727	-1.85062237596177	Z
SJC_S013900	1533	28	15	0.535714285714286	-0.900464326449086	Z
SJC_S013922	2173	35	15	0.428571428571429	-1.22239242133645	Z
SJC_S013925	3347	31	15	0.483870967741935	-1.04730571477836	Z
SJC_S013928	1164	9.5	4.2	0.442105263157895	-1.17753818555219	Z
SJC_S013931	1037	24	11	0.458333333333333	-1.12553088208386	Z
SJC_S013936	1737	34	15	0.441176470588235	-1.18057224564182	Z
SJC_S013942	1618	29	12	0.413793103448276	-1.27301849440642	Z
SJC_S013944	2608	25	10	0.4	-1.32192809488736	Z
SJC_S013951	1568	35	15	0.428571428571429	-1.22239242133645	Z
SJC_S013952	1561	32	14	0.4375	-1.1926450779424	Z
SJC_S013987	1118	36	19	0.527777777777778	-0.921997487998727	Z
SJC_S013994	1123	3.4	1.7	0.5	-1	Z
SJC_S013998	15574	32	16	0.5	-1	Z
SJC_S014007	2804	34	14	0.411764705882353	-1.28010791919274	Z
SJC_S014009	1466	20	11	0.55	-0.862496476250065	Z
SJC_S014013	3903	29	11	0.379310344827586	-1.39854937649027	Z
SJC_S014014	2346	24	12	0.5	-1	Z
SJC_S014015	6019	38	17	0.447368421052632	-1.16046467219325	Z
SJC_S014020	1399	31	14	0.451612903225806	-1.14684138832927	Z
SJC_S014041	2012	16	6.8	0.425	-1.23446525363702	Z
SJC_S014045	3057	31	14	0.451612903225806	-1.14684138832927	Z
SJC_S014056	3425	27	14	0.518518518518518	-0.947532580105864	Z
SJC_S014068	2986	36	17	0.472222222222222	-1.08246216019197	Z
SJC_S014081	7534	34	14	0.411764705882353	-1.28010791919274	Z
SJC_S014125	2325	27	14	0.518518518518518	-0.947532580105864	Z
SJC_S014132	3029	28	12	0.428571428571429	-1.22239242133645	Z
SJC_S014135	1114	20	11	0.55	-0.862496476250065	Z
SJC_S014153	6127	38	18	0.473684210526316	-1.07800251200127	Z
SJC_S014179	1730	36	20	0.555555555555556	-0.84799690655495	Z
SJC_S014184	1777	36	20	0.555555555555556	-0.84799690655495	Z
SJC_S014200	4533	36	15	0.416666666666667	-1.26303440583379	Z
SJC_S014226	2133	36	16	0.444444444444444	-1.16992500144231	Z
SJC_S014239	2143	31	17	0.548387096774194	-0.866733469136536	Z
SJC_S014245	3489	27	14	0.518518518518518	-0.947532580105864	Z
SJC_S014247	3081	36	13	0.361111111111111	-1.46948528330122	Z
SJC_S014254	1246	37	18	0.486486486486487	-1.03952836418664	Z
SJC_S014256	4383	35	16	0.457142857142857	-1.12928301694497	Z
SJC_S014261	1958	33	12	0.363636363636364	-1.4594316186373	Z
SJC_S014262	1327	31	15	0.483870967741935	-1.04730571477836	Z
SJC_S014263	1070	14	6.6	0.471428571428571	-1.08488889758651	Z
SJC_S014266	1781	33	16	0.484848484848485	-1.04439411935845	Z
SJC_S014267	5478	35	17	0.485714285714286	-1.04182017569463	Z
SJC_S014268	1175	27	14	0.518518518518518	-0.947532580105864	Z
SJC_S014269	4823	37	15	0.405405405405405	-1.30256277002043	Z
SJC_S014270	1171	32	14	0.4375	-1.1926450779424	Z
SJC_S014279	1382	29	16	0.551724137931034	-0.857980995127572	Z
SJC_S014296	1592	32	15	0.46875	-1.09310940439148	Z
SJC_S014300	1710	24	12	0.5	-1	Z
SJC_S014310	1276	38	20	0.526315789473684	-0.925999418556223	Z
SJC_S014316	3835	39	20	0.512820512820513	-0.963474123974886	Z
SJC_S014324	5642	36	15	0.416666666666667	-1.26303440583379	Z
SJC_S014326	3408	32	15	0.46875	-1.09310940439148	Z
SJC_S014349	1362	5.6	2.3	0.410714285714286	-1.28379296600059	Z
SJC_S014352	1788	26	13	0.5	-1	Z
SJC_S014358	8088	31	13	0.419354838709677	-1.25375659224578	Z
SJC_S014363	2011	26	10	0.384615384615385	-1.37851162325373	Z
SJC_S014370	1175	33	15	0.454545454545455	-1.13750352374993	Z
SJC_S014382	3305	31	13	0.419354838709677	-1.25375659224578	Z
SJC_S014397	16021	32	16	0.5	-1	Z
SJC_S014406	11385	29	14	0.482758620689655	-1.05062607306997	Z
SJC_S014407	6155	36	15	0.416666666666667	-1.26303440583379	Z
SJC_S014410	7095	31	16	0.516129032258065	-0.954196310386875	Z
SJC_S014411	3294	37	17	0.459459459459459	-1.12199052437861	Z
SJC_S014414	1984	35	16	0.457142857142857	-1.12928301694497	Z
SJC_S014427	4451	31	15	0.483870967741935	-1.04730571477836	Z
SJC_S014435	8805	31	13	0.419354838709677	-1.25375659224578	Z
SJC_S014438	8968	33	14	0.424242424242424	-1.23703919730085	Z
SJC_S014442	10520	32	15	0.46875	-1.09310940439148	Z
SJC_S014451	2508	27	14	0.518518518518518	-0.947532580105864	Z
SJC_S014454	8183	33	15	0.454545454545455	-1.13750352374993	Z
SJC_S014455	1445	33	15	0.454545454545455	-1.13750352374993	Z
SJC_S014464	10552	31	16	0.516129032258065	-0.954196310386875	Z
SJC_S014470	9123	33	15	0.454545454545455	-1.13750352374993	Z
SJC_S014472	4513	88	47	0.534090909090909	-0.90484276695966	Z
SJC_S014474	11104	3.1	1.5	0.483870967741935	-1.04730571477836	Z
SJC_S014490	4225	23	8.1	0.352173913043478	-1.50564004805975	Z
SJC_S014518	3671	52	12	0.230769230769231	-2.11547721741994	Z
SJC_S014534	2657	13	1.7	0.130769230769231	-2.93490497177811	Z
SJC_S014548	8879	10	3.4	0.34	-1.55639334852439	Z
SJC_S014557	1726	25	13	0.52	-0.943416471633633	Z
SJC_S014563	2940	6.5	3.2	0.492307692307692	-1.02236781302845	Z
SJC_S014602	3821	16	4.4	0.275	-1.86249647625006	Z
SJC_S014624	2452	8.1	3.5	0.432098765432099	-1.21056698593966	Z
SJC_S014626	2478	17	2.8	0.164705882352941	-2.6020360140801	Z
SJC_S014630	4223	7.8	3.8	0.487179487179487	-1.03747470541866	Z
SJC_S014638	3380	28	14	0.5	-1	Z
SJC_S014646	2543	17	8.7	0.511764705882353	-0.966447440288974	Z
SJC_S014650	1354	16	7	0.4375	-1.1926450779424	Z
SJC_S014674	1585	23	11	0.478260869565217	-1.06413033741972	Z
SJC_S014683	2852	14	5.2	0.371428571428571	-1.42884329880387	Z
SJC_S014687	1165	3.8	1.9	0.5	-1	Z
SJC_S014697	2457	14	6.5	0.464285714285714	-1.10691520391651	Z
SJC_S014715	1774	51	14	0.274509803921569	-1.86507041991389	Z
SJC_S014720	1027	3.5	1.9	0.542857142857143	-0.881355503501381	Z
SJC_S014725	1242	26	11	0.423076923076923	-1.24100809950379	Z
SJC_S014729	1330	27	8.1	0.3	-1.73696559416621	Z
SJC_S014740	4092	11	1.6	0.145454545454545	-2.78135971352466	Z
SJC_S014744	1541	6	3.3	0.55	-0.862496476250065	Z
SJC_S014745	1117	17	9.2	0.541176470588235	-0.885828980080689	Z
SJC_S014752	8402	38	19	0.5	-1	Z
SJC_S014809	2284	35	17	0.485714285714286	-1.04182017569463	Z
SJC_S014811	1003	8	3.5	0.4375	-1.1926450779424	Z
SJC_S014816	1296	13	2.2	0.169230769230769	-2.56293619439116	Z
SJC_S014818	1483	11	3.1	0.281818181818182	-1.82716340313778	Z
SJC_S014826	1456	8.8	2.3	0.261363636363636	-1.93586966258028	Z
SJC_S014835	2617	15	4.7	0.313333333333333	-1.67422983881824	Z
SJC_S014837	1443	11	4	0.363636363636364	-1.4594316186373	Z
SJC_S014864	6612	12	2.3	0.191666666666667	-2.38332863955151	Z
SJC_S014880	1794	29	16	0.551724137931034	-0.857980995127572	Z
SJC_S014905	2986	6.3	2.6	0.412698412698413	-1.27684020535882	Z
SJC_S014917	2727	32	15	0.46875	-1.09310940439148	Z
SJC_S014921	3659	31	16	0.516129032258065	-0.954196310386875	Z
SJC_S014926	3768	24	7.9	0.329166666666667	-1.60310984743142	Z
SJC_S014942	1994	11	5.6	0.509090909090909	-0.974004791467056	Z
SJC_S014943	1091	25	10	0.4	-1.32192809488736	Z
SJC_S014945	1236	9.2	3	0.326086956521739	-1.61667136044849	Z
SJC_S014947	6795	26	14	0.538461538461538	-0.893084796083488	Z
SJC_S014948	1110	4.5	2	0.444444444444444	-1.16992500144231	Z
SJC_S014972	1193	29	14	0.482758620689655	-1.05062607306997	Z
SJC_S014982	1397	18	7.4	0.411111111111111	-1.28239973070072	Z
SJC_S014983	1202	3.5	1.6	0.457142857142857	-1.12928301694497	Z
SJC_S015001	1131	14	6.3	0.45	-1.15200309344505	Z
SJC_S015014	1449	19	10	0.526315789473684	-0.925999418556223	Z
SJC_S015017	1346	13	6.4	0.492307692307692	-1.02236781302845	Z
SJC_S015018	1302	28	15	0.535714285714286	-0.900464326449086	Z
SJC_S015034	2485	20	9.7	0.485	-1.0439433475876	Z
SJC_S015056	1075	19	8.5	0.447368421052632	-1.16046467219325	Z
SJC_S015062	2607	31	8.2	0.264516129032258	-1.91857240065615	Z
SJC_S015065	1737	32	16	0.5	-1	Z
SJC_S015090	1661	21	11	0.523809523809524	-0.932885804141463	Z
SJC_S015092	1207	35	8.9	0.254285714285714	-1.97547768086593	Z
SJC_S015109	5916	2.6	1.4	0.538461538461538	-0.893084796083488	Z
SJC_S015110	1652	4.3	1.6	0.372093023255814	-1.4262647547021	Z
SJC_S015119	1020	22	6.8	0.309090909090909	-1.69389687227432	Z
SJC_S015120	1536	16	1.7	0.10625	-3.23446525363702	Z
SJC_S015126	1732	9.6	3.1	0.322916666666667	-1.63076619033428	Z
SJC_S015180	1721	5.2	2	0.384615384615385	-1.37851162325373	Z
SJC_S015220	1398	22	12	0.545454545454545	-0.874469117916141	Z
SJC_S015225	1038	14	5.4	0.385714285714286	-1.3743955147815	Z
SJC_S015229	1030	21	8.2	0.39047619047619	-1.35669351304804	Z
SJC_S015239	1098	15	3.4	0.226666666666667	-2.14135584924554	Z
SJC_S015256	1001	16	6.7	0.41875	-1.25583890442959	Z
SJC_S015268	1766	38	15	0.394736842105263	-1.34103691783507	Z
SJC_S015277	1930	11	3.2	0.290909090909091	-1.78135971352466	Z
SJC_S015290	1190	33	2	0.0606060606060606	-4.04439411935845	Z
SJC_S015293	2722	33	18	0.545454545454545	-0.874469117916141	Z
SJC_S015305	1041	13	4.5	0.346153846153846	-1.53051471669878	Z
SJC_S015322	1716	2.9	1.3	0.448275862068966	-1.15754127698648	Z
SJC_S015338	1225	29	6.8	0.23448275862069	-2.09244624876459	Z
SJC_S015350	1655	37	15	0.405405405405405	-1.30256277002043	Z
SJC_S015365	3052	36	18	0.5	-1	Z
SJC_S015369	1048	32	15	0.46875	-1.09310940439148	Z
SJC_S015400	1013	17	6.5	0.382352941176471	-1.38702312310925	Z
SJC_S015415	1833	13	4.7	0.361538461538462	-1.46777896135082	Z
SJC_S015423	1149	12	4.4	0.366666666666667	-1.44745897697122	Z
SJC_S015424	1079	8.5	4	0.470588235294118	-1.08746284125034	Z
SJC_S015429	1501	14	7	0.5	-1	Z
SJC_S015431	3331	7.8	3.5	0.448717948717949	-1.15611920191728	Z
SJC_S015440	3066	27	13	0.481481481481481	-1.05444778402238	Z
SJC_S015443	1128	3.7	1.3	0.351351351351351	-1.50901364748786	Z
SJC_S015449	1055	7.4	4	0.54054054054054	-0.887525270741588	Z
SJC_S015467	1236	17	1.7	0.1	-3.32192809488736	Z
SJC_S015493	3978	220	110	0.5	-1	Z
SJC_S015499	1575	3.7	2	0.54054054054054	-0.887525270741588	Z
SJC_S015506	2012	6.5	1.3	0.2	-2.32192809488736	Z
SJC_S015520	2280	15	7.3	0.486666666666667	-1.03899413161586	Z
SJC_S015525	1153	32	14	0.4375	-1.1926450779424	Z
SJC_S015548	2119	4.5	2.5	0.555555555555556	-0.84799690655495	Z
SJC_S015549	1472	17	6.3	0.370588235294118	-1.43211101263779	Z
SJC_S015584	1564	29	15	0.517241379310345	-0.951090399519053	Z
SJC_S015593	4822	3.1	1.7	0.548387096774194	-0.866733469136536	Z
SJC_S015602	1233	8.6	1.7	0.197674418604651	-2.33880191345176	Z
SJC_S015610	1473	25	11	0.44	-1.18442457113743	Z
SJC_S015617	2612	6.9	2.5	0.36231884057971	-1.46466826700344	Z
SJC_S015619	2668	9.3	5	0.537634408602151	-0.895302621333307	Z
SJC_S015628	1625	5.3	1.8	0.339622641509434	-1.55799545312089	Z
SJC_S015634	2447	7.1	3.7	0.52112676056338	-0.940293753875732	Z
SJC_S015636	2427	22	12	0.545454545454545	-0.874469117916141	Z
SJC_S015671	3912	37	16	0.432432432432432	-1.20945336562895	Z
SJC_S015678	1105	26	14	0.538461538461538	-0.893084796083488	Z
SJC_S015681	2917	2.3	1.2	0.521739130434783	-0.938599455335857	Z
SJC_S015683	1282	80	31	0.3875	-1.36773178450049	Z
SJC_S015694	1048	20	3.8	0.19	-2.39592867633114	Z
SJC_S015754	1021	14	7.1	0.507142857142857	-0.979535897440284	Z
SJC_S015786	1122	4.3	2	0.465116279069767	-1.10433665981474	Z
SJC_S015795	1013	6.5	1.8	0.276923076923077	-1.85244281158614	Z
SJC_S015818	2958	7	2.5	0.357142857142857	-1.48542682717024	Z
SJC_S015829	2295	29	15	0.517241379310345	-0.951090399519053	Z
SJC_S015837	1890	17	3.9	0.229411764705882	-2.12398871727545	Z
SJC_S015845	2633	8.4	4.3	0.511904761904762	-0.966052668076662	Z
SJC_S015850	7713	31	14	0.451612903225806	-1.14684138832927	Z
SJC_S015851	1627	17	7	0.411764705882353	-1.28010791919274	Z
SJC_S015853	1248	32	13	0.40625	-1.29956028185891	Z
SJC_S015855	1483	23	11	0.478260869565217	-1.06413033741972	Z
SJC_S015864	1400	9.6	2	0.208333333333333	-2.26303440583379	Z
SJC_S015887	2756	5.2	2.9	0.557692307692308	-0.84245872301352	Z
SJC_S015890	3806	5.5	2.5	0.454545454545455	-1.13750352374993	Z
SJC_S015900	1025	9.4	5.1	0.542553191489362	-0.882163509706142	Z
SJC_S015905	2690	4.6	1.5	0.326086956521739	-1.61667136044849	Z
SJC_S015931	1650	24	12	0.5	-1	Z
SJC_S015936	7477	3.2	1.7	0.53125	-0.912537158749661	Z
SJC_S015983	2152	24	10	0.416666666666667	-1.26303440583379	Z
SJC_S015991	1389	7.8	3.5	0.448717948717949	-1.15611920191728	Z
SJC_S016018	1055	15	7.1	0.473333333333333	-1.0790715709912	Z
SJC_S016025	1012	14	7.1	0.507142857142857	-0.979535897440284	Z
SJC_S016041	1163	4	1.3	0.325	-1.62148837674627	Z
SJC_S016048	1003	11	3.5	0.318181818181818	-1.65207669657969	Z
SJC_S016070	1212	8	4.4	0.55	-0.862496476250065	Z
SJC_S016073	1056	9.2	4.8	0.521739130434783	-0.938599455335857	Z
SJC_S016098	1901	3.7	1.6	0.432432432432432	-1.20945336562895	Z
SJC_S016146	1324	12	2.9	0.241666666666667	-2.04890960048095	Z
SJC_S016150	1045	10	5	0.5	-1	Z
SJC_S016157	1973	14	6.9	0.492857142857143	-1.0207585601668	Z
SJC_S016167	1474	26	11	0.423076923076923	-1.24100809950379	Z
SJC_S016205	1162	11	2	0.181818181818182	-2.4594316186373	Z
SJC_S016215	1801	63	34	0.53968253968254	-0.889817082249577	Z
SJC_S016250	1815	9.1	4.3	0.472527472527473	-1.0815298854966	Z
SJC_S016266	2293	12	5.2	0.433333333333333	-1.20645087746743	Z
SJC_S016297	1695	26	12	0.461538461538462	-1.11547721741994	Z
SJC_S016308	1492	12	4.9	0.408333333333333	-1.29218075149331	Z
SJC_S016325	1498	9.2	3.7	0.402173913043478	-1.31410859042806	Z
SJC_S016330	1122	26	5.1	0.196153846153846	-2.34994247105696	Z
SJC_S016331	1225	9.9	3	0.303030303030303	-1.72246602447109	Z
SJC_S016345	1407	36	14	0.388888888888889	-1.36257007938471	Z
SJC_S016358	1390	26	9.8	0.376923076923077	-1.40765796891325	Z
SJC_S016362	2137	8.4	2.7	0.321428571428571	-1.63742992061529	Z
SJC_S016370	1074	10	5.5	0.55	-0.862496476250065	Z
SJC_S016396	1080	8.6	4.3	0.5	-1	Z
SJC_S016423	1459	8.6	2	0.232558139534884	-2.10433665981474	Z
SJC_S016442	1893	10	2	0.2	-2.32192809488736	Z
SJC_S016447	1695	31	9.7	0.312903225806452	-1.67621156308711	Z
SJC_S016448	3039	18	9.9	0.55	-0.862496476250065	Z
SJC_S016456	1402	19	5.6	0.294736842105263	-1.76250068627334	Z
SJC_S016463	1215	14	5.4	0.385714285714286	-1.3743955147815	Z
SJC_S016464	2965	13	6.1	0.469230769230769	-1.09163047546557	Z
SJC_S016474	1231	11	4.5	0.409090909090909	-1.28950661719498	Z
SJC_S016484	1673	21	8.2	0.39047619047619	-1.35669351304804	Z
SJC_S016528	3238	69	36	0.521739130434783	-0.938599455335857	Z
SJC_S016530	1251	4.7	2	0.425531914893617	-1.23266075679027	Z
SJC_S016532	1226	11	4.1	0.372727272727273	-1.42380770890658	Z
SJC_S016547	1312	13	4.7	0.361538461538462	-1.46777896135082	Z
SJC_S016558	1162	8.7	4.5	0.517241379310345	-0.951090399519053	Z
SJC_S016574	1658	30	14	0.466666666666667	-1.09953567355091	Z
SJC_S016597	1047	24	12	0.5	-1	Z
SJC_S016644	1654	13	6.8	0.523076923076923	-0.934904971778115	Z
SJC_S016690	1799	4.7	2.5	0.531914893617021	-0.910732661902913	Z
SJC_S016698	1176	13	5.7	0.438461538461538	-1.18947779886371	Z
SJC_S016731	1888	5.1	2.5	0.490196078431373	-1.02856915219677	Z
SJC_S016738	3372	3.2	1.4	0.4375	-1.1926450779424	Z
SJC_S016745	1351	29	15	0.517241379310345	-0.951090399519053	Z
SJC_S016779	2137	16	8.4	0.525	-0.929610672108602	Z
SJC_S016787	2242	5.6	2.1	0.375	-1.41503749927884	Z
SJC_S016803	1482	15	8.2	0.546666666666667	-0.871266685877797	Z
SJC_S016828	1994	17	8.4	0.494117647058824	-1.01707351335894	Z
SJC_S016845	1602	41	15	0.365853658536585	-1.45066140900957	Z
SJC_S016855	1002	11	5.1	0.463636363636364	-1.10893437155316	Z
SJC_S016881	1310	3	1.3	0.433333333333333	-1.20645087746743	Z
SJC_S016885	2254	45	21	0.466666666666667	-1.09953567355091	Z
SJC_S016887	1991	94	44	0.468085106382979	-1.09515723304034	Z
SJC_S016908	1610	6.8	1.9	0.279411764705882	-1.83953532780675	Z
SJC_S016911	2827	35	15	0.428571428571429	-1.22239242133645	Z
SJC_S016924	1318	15	2	0.133333333333333	-2.90689059560852	Z
SJC_S016926	1637	21	8.5	0.404761904761905	-1.30485458152842	Z
SJC_S016955	1293	9.7	2	0.206185567010309	-2.27798474729977	Z
SJC_S016958	1290	17	7.3	0.429411764705882	-1.21956637725768	Z
SJC_S016965	1269	27	7.4	0.274074074074074	-1.86736223142188	Z
SJC_S016985	3348	8.3	3.7	0.44578313253012	-1.16558606571798	Z
SJC_S016987	1977	38	19	0.5	-1	Z
SJC_S016988	1463	26	12	0.461538461538462	-1.11547721741994	Z
SJC_S016990	2941	29	16	0.551724137931034	-0.857980995127572	Z
SJC_S016993	1172	70	27	0.385714285714286	-1.3743955147815	Z
SJC_S017006	1587	12	2.2	0.183333333333333	-2.44745897697122	Z
SJC_S017015	1244	6.7	3.5	0.522388059701492	-0.936806173512806	Z
SJC_S017025	1825	31	17	0.548387096774194	-0.866733469136536	Z
SJC_S017059	2045	6.7	2.8	0.417910447761194	-1.25873426840017	Z
SJC_S017083	2011	4	2	0.5	-1	Z
SJC_S017104	1384	30	12	0.4	-1.32192809488736	Z
SJC_S017106	2249	33	5.9	0.178787878787879	-2.48367916488397	Z
SJC_S017127	1036	11	5.4	0.490909090909091	-1.02647221136119	Z
SJC_S017128	1127	27	15	0.555555555555556	-0.84799690655495	Z
SJC_S017138	2200	9	4	0.444444444444444	-1.16992500144231	Z
SJC_S017157	1423	12	2.4	0.2	-2.32192809488736	Z
SJC_S017169	2372	17	1.9	0.111764705882353	-3.16146342269412	Z
SJC_S017173	1160	19	6.8	0.357894736842105	-1.48239276708061	Z
SJC_S017176	1751	3.6	2	0.555555555555556	-0.84799690655495	Z
SJC_S017177	1224	16	7.4	0.4625	-1.11247472925841	Z
SJC_S017187	1433	6.7	2.8	0.417910447761194	-1.25873426840017	Z
SJC_S017203	1012	15	8.3	0.553333333333333	-0.853779259148956	Z
SJC_S017229	1025	22	12	0.545454545454545	-0.874469117916141	Z
SJC_S017234	1342	12	6.6	0.55	-0.862496476250065	Z
SJC_S017250	2312	100	49	0.49	-1.02914634565952	Z
SJC_S017257	1209	22	6	0.272727272727273	-1.87446911791614	Z
SJC_S017285	4358	34	12	0.352941176470588	-1.50250034052918	Z
SJC_S017313	1415	9.4	4.7	0.5	-1	Z
SJC_S017321	1554	5.7	2.7	0.473684210526316	-1.07800251200127	Z
SJC_S017344	1787	17	8.9	0.523529411764706	-0.933657505171304	Z
SJC_S017346	1022	14	3.7	0.264285714285714	-1.91982965131602	Z
SJC_S017365	1154	22	12	0.545454545454545	-0.874469117916141	Z
SJC_S017377	1084	21	11	0.523809523809524	-0.932885804141463	Z
SJC_S017380	2718	11	3.8	0.345454545454545	-1.53343220008107	Z
SJC_S017382	1890	9.8	4.3	0.438775510204082	-1.18844508941311	Z
SJC_S017409	1021	29	15	0.517241379310345	-0.951090399519053	Z
SJC_S017427	1303	5	2	0.4	-1.32192809488736	Z
SJC_S017430	3672	31	15	0.483870967741935	-1.04730571477836	Z
SJC_S017443	1166	9.9	1.9	0.191919191919192	-2.38142910663602	Z
SJC_S017450	1873	22	11	0.5	-1	Z
SJC_S017474	2576	31	11	0.354838709677419	-1.49476469174958	Z
SJC_S017489	1527	8.7	4	0.459770114942529	-1.12101540096137	Z
SJC_S017497	3318	33	13	0.393939393939394	-1.34395440121736	Z
SJC_S017504	1294	8.1	2.4	0.296296296296296	-1.75488750216347	Z
SJC_S017508	1082	23	11	0.478260869565217	-1.06413033741972	Z
SJC_S017517	3898	30	14	0.466666666666667	-1.09953567355091	Z
SJC_S017522	1850	16	8.1	0.50625	-0.982078092002738	Z
SJC_S017535	1285	13	6.8	0.523076923076923	-0.934904971778115	Z
SJC_S017559	1490	33	15	0.454545454545455	-1.13750352374993	Z
SJC_S017565	4826	22	12	0.545454545454545	-0.874469117916141	Z
SJC_S017568	1562	25	11	0.44	-1.18442457113743	Z
SJC_S017571	1958	33	14	0.424242424242424	-1.23703919730085	Z
SJC_S017573	3427	9.1	2.5	0.274725274725275	-1.86393845042397	Z
SJC_S017595	4775	12	2.8	0.233333333333333	-2.09953567355091	Z
SJC_S017600	2003	31	15	0.483870967741935	-1.04730571477836	Z
SJC_S017605	1629	9.1	4.9	0.538461538461539	-0.893084796083488	Z
SJC_S017612	1445	3.6	1.9	0.527777777777778	-0.921997487998727	Z
SJC_S017616	1777	8	3.3	0.4125	-1.27753397552891	Z
SJC_S017653	2708	18	8	0.444444444444444	-1.16992500144231	Z
SJC_S017662	1325	8.8	1.8	0.204545454545455	-2.28950661719499	Z
SJC_S017695	1798	17	9	0.529411764705882	-0.917537839808027	Z
SJC_S017696	1179	31	17	0.548387096774194	-0.866733469136536	Z
SJC_S017724	1854	23	11	0.478260869565217	-1.06413033741972	Z
SJC_S017731	4529	30	15	0.5	-1	Z
SJC_S017738	2609	36	19	0.527777777777778	-0.921997487998727	Z
SJC_S017747	2606	11	6.1	0.554545454545455	-0.850622375961773	Z
SJC_S017761	1597	17	6.3	0.370588235294118	-1.43211101263779	Z
SJC_S017775	1870	33	18	0.545454545454545	-0.874469117916141	Z
SJC_S017781	2500	26	13	0.5	-1	Z
SJC_S017782	2118	19	8.4	0.442105263157895	-1.17753818555219	Z
SJC_S017806	2052	17	9	0.529411764705882	-0.917537839808027	Z
SJC_S017859	6115	7.3	2.1	0.287671232876712	-1.79750713610126	Z
SJC_S017870	1450	21	9.6	0.457142857142857	-1.12928301694497	Z
SJC_S017880	1292	11	2.9	0.263636363636364	-1.92337871839709	Z
SJC_S017899	1106	14	2.2	0.157142857142857	-2.66985139830767	Z
SJC_S017907	1433	26	13	0.5	-1	Z
SJC_S017918	1491	2.7	1.5	0.555555555555555	-0.84799690655495	Z
SJC_S017919	1781	7.7	4.2	0.545454545454545	-0.874469117916141	Z
SJC_S017953	3613	6.9	3.8	0.550724637681159	-0.860596943334584	Z
SJC_S017959	1504	4	2	0.5	-1	Z
SJC_S017967	1132	18	4	0.222222222222222	-2.16992500144231	Z
SJC_S017970	1051	34	8.3	0.244117647058824	-2.03435150479078	Z
SJC_S017999	2393	22	5.1	0.231818181818182	-2.10893437155316	Z
SJC_S018009	1550	4.6	2.5	0.543478260869565	-0.879705766282288	Z
SJC_S018012	3362	18	8.3	0.461111111111111	-1.11681366498275	Z
SJC_S018045	1025	18	10	0.555555555555556	-0.84799690655495	Z
SJC_S018048	3667	29	13	0.448275862068966	-1.15754127698648	Z
SJC_S018050	2793	12	5.6	0.466666666666667	-1.09953567355091	Z
SJC_S018055	3040	37	17	0.459459459459459	-1.12199052437861	Z
SJC_S018065	2781	16	6.3	0.39375	-1.34464817138745	Z
SJC_S018067	3175	36	19	0.527777777777778	-0.921997487998727	Z
SJC_S018078	3335	21	9.3	0.442857142857143	-1.17508670655809	Z
SJC_S018087	1605	27	8.3	0.307407407407407	-1.70177616570391	Z
SJC_S018093	5461	4.8	2.1	0.4375	-1.1926450779424	Z
SJC_S018106	4297	24	13	0.541666666666667	-0.884522782580064	Z
SJC_S018107	2764	17	6.4	0.376470588235294	-1.4093909361377	Z
SJC_S018109	1362	7.8	4.3	0.551282051282051	-0.85913746416015	Z
SJC_S018206	2106	4.2	1.9	0.452380952380952	-1.14438990933518	Z
SJC_S018208	1581	120	18	0.15	-2.73696559416621	Z
SJC_S018258	1885	9.1	3.7	0.406593406593407	-1.29834127456975	Z
SJC_S018267	1440	17	4.6	0.270588235294118	-1.88582898008069	Z
SJC_S018339	2806	33	15	0.454545454545455	-1.13750352374993	Z
SJC_S018361	1011	18	7.9	0.438888888888889	-1.18807234815257	Z
SJC_S018407	2439	24	7.2	0.3	-1.73696559416621	Z
SJC_S018411	1638	81	23	0.283950617283951	-1.81628804682761	Z
SJC_S018436	1004	5.4	1.4	0.259259259259259	-1.94753258010586	Z
SJC_S018446	1891	11	3.9	0.354545454545455	-1.49595749466241	Z
SJC_S018450	1011	29	16	0.551724137931034	-0.857980995127572	Z
SJC_S018487	1321	6.7	3.6	0.537313432835821	-0.89616418901546	Z
SJC_S018499	1186	7.3	3.4	0.465753424657534	-1.10236171762968	Z
SJC_S018533	1051	2.7	1.4	0.518518518518518	-0.947532580105864	Z
SJC_S018543	1650	33	14	0.424242424242424	-1.23703919730085	Z
SJC_S018545	1539	50	23	0.46	-1.12029423371771	Z
SJC_S018551	1716	24	12	0.5	-1	Z
SJC_S018649	1250	150	59	0.393333333333333	-1.34617564113404	Z
SJC_S018650	1659	11	5.2	0.472727272727273	-1.08091999538357	Z
SJC_S018653	1221	28	12	0.428571428571429	-1.22239242133645	Z
SJC_S018702	1376	7.1	3.9	0.549295774647887	-0.864344900642434	Z
SJC_S018709	2449	40	12	0.3	-1.73696559416621	Z
SJC_S018751	2897	4.4	1.2	0.272727272727273	-1.87446911791614	Z
SJC_S018765	2979	2.8	1.3	0.464285714285714	-1.10691520391651	Z
SJC_S018865	1973	37	12	0.324324324324324	-1.62449086490779	Z
SJC_S019022	2008	9.4	1.3	0.138297872340426	-2.85414913353654	Z
SJC_S019053	4738	33	14	0.424242424242424	-1.23703919730085	Z
SJC_S019073	1873	23	11	0.478260869565217	-1.06413033741972	Z
SJC_S019097	1321	13	5.3	0.407692307692308	-1.29444735846526	Z
SJC_S019138	1423	7.8	2.1	0.269230769230769	-1.89308479608349	Z
SJC_S019143	1176	7.3	3.8	0.520547945205479	-0.941897045436432	Z
SJC_S019153	1752	33	16	0.484848484848485	-1.04439411935845	Z
SJC_S019181	2846	36	15	0.416666666666667	-1.26303440583379	Z
SJC_S019184	1770	18	6.5	0.361111111111111	-1.46948528330122	Z
SJC_S019212	1623	6.8	2.4	0.352941176470588	-1.50250034052918	Z
SJC_S019223	2794	33	18	0.545454545454545	-0.874469117916141	Z
SJC_S019269	1754	49	7.6	0.155102040816327	-2.68871042555898	Z
SJC_S019286	1469	16	7.9	0.49375	-1.01814734671026	Z
SJC_S019334	1112	32	14	0.4375	-1.1926450779424	Z
SJC_S019336	1358	36	19	0.527777777777778	-0.921997487998727	Z
SJC_S019352	1223	20	6.9	0.345	-1.53533173299656	Z
SJC_S019370	2514	17	4	0.235294117647059	-2.08746284125034	Z
SJC_S019373	1177	4.6	2	0.434782608695652	-1.20163386116965	Z
SJC_S019455	2515	3.3	1.5	0.454545454545455	-1.13750352374993	Z
SJC_S019456	3628	2.9	1.6	0.551724137931034	-0.857980995127572	Z
SJC_S019500	1610	39	15	0.384615384615385	-1.37851162325373	Z
SJC_S019511	2248	30	12	0.4	-1.32192809488736	Z
SJC_S019514	2396	6.5	1.8	0.276923076923077	-1.85244281158614	Z
SJC_S019529	1877	6.3	1.4	0.222222222222222	-2.16992500144231	Z
SJC_S019595	1871	19	8.4	0.442105263157895	-1.17753818555219	Z
SJC_S019646	1344	9.1	3.2	0.351648351648352	-1.5077946401987	Z
SJC_S019675	3956	35	19	0.542857142857143	-0.881355503501381	Z
SJC_S019726	1479	570	110	0.192982456140351	-2.37345839552744	Z
SJC_S019803	3056	2.9	1.5	0.517241379310345	-0.951090399519053	Z
SJC_S019845	2264	40	15	0.375	-1.41503749927884	Z
SJC_S019964	1505	31	15	0.483870967741935	-1.04730571477836	Z
SJC_S019985	2854	17	4.4	0.258823529411765	-1.9499593175004	Z
SJC_S020016	1330	12	4.2	0.35	-1.51457317282976	Z
SJC_S020046	1872	14	5.8	0.414285714285714	-1.27130202181739	Z
SJC_S020072	1203	10	2.3	0.23	-2.12029423371771	Z
SJC_S020100	2557	7.9	4.3	0.544303797468354	-0.877515993475005	Z
SJC_S020136	1336	33	17	0.515151515151515	-0.956931278108114	Z
SJC_S020188	1445	11	4.7	0.427272727272727	-1.22677086184702	Z
SJC_S020222	2133	8.8	4	0.454545454545455	-1.13750352374993	Z
SJC_S020236	1565	11	3.3	0.3	-1.73696559416621	Z
SJC_S020241	2089	35	9.7	0.277142857142857	-1.8512982696452	Z
SJC_S020253	2756	26	13	0.5	-1	Z
SJC_S020257	2449	37	18	0.486486486486487	-1.03952836418664	Z
SJC_S020258	3075	19	3.9	0.205263157894737	-2.2844533894687	Z
SJC_S020270	2321	24	12	0.5	-1	Z
SJC_S020282	1211	9.1	1.5	0.164835164835165	-2.60090404459018	Z
SJC_S020328	2086	6.3	1.9	0.301587301587302	-1.72935241005633	Z
SJC_S020367	2659	34	12	0.352941176470588	-1.50250034052918	Z
SJC_S020374	5258	31	15	0.483870967741935	-1.04730571477836	Z
SJC_S020386	1713	27	11	0.407407407407407	-1.29545588352617	Z
SJC_S020388	1903	11	4.5	0.409090909090909	-1.28950661719498	Z
SJC_S020487	1187	26	3.8	0.146153846153846	-2.77444029958487	Z
SJC_S020523	2112	37	19	0.513513513513513	-0.961525852185364	Z
SJC_S020530	1556	8.2	3	0.365853658536585	-1.45066140900957	Z
SJC_S020535	2467	36	15	0.416666666666667	-1.26303440583379	Z
SJC_S020605	1377	9.3	2	0.21505376344086	-2.21723071622067	Z
SJC_S020611	1527	3.4	1.8	0.529411764705882	-0.917537839808027	Z
SJC_S020617	2645	3.8	1.1	0.289473684210526	-1.78849589480629	Z
SJC_S020621	2591	27	12	0.444444444444444	-1.16992500144231	Z
SJC_S020640	1481	4	1.5	0.375	-1.41503749927884	Z
SJC_S020656	1543	3.9	2	0.512820512820513	-0.963474123974886	Z
SJC_S020664	1382	7.1	2.4	0.338028169014085	-1.56478461878353	Z
SJC_S020722	1362	23	12	0.521739130434783	-0.938599455335857	Z
SJC_S020724	1680	8.3	2.4	0.289156626506024	-1.79007693062577	Z
SJC_S020768	1063	5.1	2.6	0.509803921568628	-0.971985623830403	Z
SJC_S020781	4138	38	16	0.421052631578947	-1.24792751344359	Z
SJC_S020799	3995	32	15	0.46875	-1.09310940439148	Z
SJC_S020803	6848	34	16	0.470588235294118	-1.08746284125034	Z
SJC_S020843	1778	110	42	0.381818181818182	-1.3890422907459	Z
SJC_S020850	1547	3.9	1.6	0.41025641025641	-1.28540221886225	Z
SJC_S020896	3614	2.6	1.2	0.461538461538462	-1.11547721741994	Z
SJC_S020950	3337	31	5.6	0.180645161290323	-2.46876948321663	Z
SJC_S020996	1915	30	16	0.533333333333333	-0.906890595608519	Z
[truncated: 16,854 more rows]
