# Supplementary material for: Evolution of gene dosage on the Z-chromosome of schistosome parasites
Source: eLife. 2018 Jul 25;7:e35684. doi: 10.7554/eLife.35684 (PMC6089595; doi:10.7554/eLife.35684)
Supplement: Figure 2—source data 1. [file elife-35684-fig2-data1.xlsx]

## Sheet: Figure 2-source data 1
Figure 2-source data 1: RPKM calculation for S. mansoni gene expression
Gene feature						Read count											Total count per library											Used RPKM for R
Gene_ID	Genomic_location	First_base	Last_base	Gene_length (kb)		SRR3223428	SRR3223429	SRR3223443	SRR3223444	ERR506090	ERR506088	ERR506084	ERR506083	ERR506082	ERR506076		SRR3223428	SRR3223429	SRR3223443	SRR3223444	ERR506090	ERR506088	ERR506084	ERR506083	ERR506082	ERR506076		Gene_ID	SRR3223428	SRR3223429	SRR3223443	SRR3223444	ERR506090	ERR506088	ERR506084	ERR506083	ERR506082	ERR506076
SM-001-1.1.1	Chr_4	15507268	15507335	0.067		0	0	0	0	0	0	0	0	0	0		29310039	28470299	27716462	27332307	4477828	4746467	3221676	3629274	2370375	6973855		SM-001-1.1.1	0	0	0	0	0	0	0	0	0	0
SM-124-1_1_1	Chr_6	18429530	18429615	0.085		0	0	0	0	0	0	0	0	0	0													SM-124-1_1_1	0	0	0	0	0	0	0	0	0	0
Schisto_mansoni.mitochondria_rRNA1	mitochondria	2565	3619	1.054		61421	24772	20087	71044	14400	18106	4885	6723	14234	63265													Schisto_mansoni.mitochondria_rRNA1	1988.2	825.522	687.601	2466.1	3051.09	3619.19	1438.61	1757.53	5697.3	8606.96
Schisto_mansoni.mitochondria_rRNA2	mitochondria	3686	4437	0.751		71386	30878	18192	61578	11047	12226	4232	4081	7185	34300		Total count per library / 1,000,000											Schisto_mansoni.mitochondria_rRNA2	3243.07	1444.17	873.982	2999.92	3285.01	3429.84	1749.14	1497.29	4036.17	6549.09
Sm_mito_tRNA1.1	mitochondria	1	68	0.067		21	1	1	23	0	0	0	0	0	0		SRR3223428	SRR3223429	SRR3223443	SRR3223444	ERR506090	ERR506088	ERR506084	ERR506083	ERR506082	ERR506076		Sm_mito_tRNA1.1	10.6937	0.524244	0.538502	12.5596	0	0	0	0	0	0
Sm_mito_tRNA10.1	mitochondria	5582	5646	0.064		102	42	24	78	2	0	2	0	1	1		29.31	28.4703	27.7165	27.3323	4.47783	4.74647	3.22168	3.62927	2.37038	6.97386		Sm_mito_tRNA10.1	54.3756	23.0503	13.5299	44.5901	6.97883	0	9.69992	0	6.59178	2.24051
Sm_mito_tRNA11.1	mitochondria	5691	5750	0.059		3	3	5	10	1	0	2	0	0	1													Sm_mito_tRNA11.1	1.73481	1.78598	3.0576	6.20114	3.78513	0	10.5219	0	0	2.43038
Sm_mito_tRNA12.1	mitochondria	5768	5841	0.073		69	37	11	37	5	0	0	0	0	2													Sm_mito_tRNA12.1	32.2485	17.8027	5.43666	18.544	15.2961	0	0	0	0	3.92857
Sm_mito_tRNA13.1	mitochondria	5870	5931	0.061		159	61	25	77	1	2	1	0	1	1													Sm_mito_tRNA13.1	88.9305	35.1243	14.7867	46.1833	3.66103	6.90764	5.08848	0	6.91597	2.3507
Sm_mito_tRNA14.1	mitochondria	5953	6017	0.064		8	0	14	14	0	0	1	0	0	1													Sm_mito_tRNA14.1	4.26475	0	7.89242	8.00335	0	0	4.84996	0	0	2.24051
Sm_mito_tRNA15.1	mitochondria	7441	7507	0.066		22	6	10	22	0	0	0	0	0	0													Sm_mito_tRNA15.1	11.3727	3.19312	5.46661	12.1956	0	0	0	0	0	0
Sm_mito_tRNA16.1	mitochondria	7515	7587	0.072		10	2	1	9	0	0	0	0	0	0													Sm_mito_tRNA16.1	4.73861	0.975676	0.501106	4.57334	0	0	0	0	0	0
Sm_mito_tRNA17.1	mitochondria	7597	7664	0.067		0	0	1	0	0	0	0	0	0	2													Sm_mito_tRNA17.1	0	0	0.538502	0	0	0	0	0	0	4.28038
Sm_mito_tRNA18.1	mitochondria	9333	9401	0.068		11	2	4	15	0	0	2	0	2	1													Sm_mito_tRNA18.1	5.51909	1.03307	2.12233	8.0706	0	0	9.12934	0	12.4081	2.10872
Sm_mito_tRNA19.1	mitochondria	10097	10167	0.07		0	1	0	1	0	0	0	0	0	0													Sm_mito_tRNA19.1	0	0.501776	0	0.522668	0	0	0	0	0	0
Sm_mito_tRNA2.1	mitochondria	73	142	0.069		33	8	4	5	0	0	1	0	4	1													Sm_mito_tRNA2.1	16.3173	4.07239	2.09157	2.65121	0	0	4.49851	0	24.4565	2.07816
Sm_mito_tRNA20.1	mitochondria	10172	10242	0.07		0	0	0	0	0	0	0	0	0	0													Sm_mito_tRNA20.1	0	0	0	0	0	0	0	0	0	0
Sm_mito_tRNA21.1	mitochondria	12891	12953	0.062		50	18	20	33	1	0	2	2	1	7													Sm_mito_tRNA21.1	27.5145	10.1974	11.6386	19.4736	3.60198	0	10.0128	8.8883	6.80442	16.1895
Sm_mito_tRNA22.1	mitochondria	12979	13048	0.069		4	1	5	17	0	0	0	0	0	0													Sm_mito_tRNA22.1	1.97786	0.509048	2.61447	9.01412	0	0	0	0	0	0
Sm_mito_tRNA23.1	mitochondria	13447	13520	0.073		4	5	14	14	0	0	0	0	5	12													Sm_mito_tRNA23.1	1.86948	2.40578	6.91938	7.01663	0	0	0	0	28.8955	23.5714
Sm_mito_tRNA3.1	mitochondria	367	436	0.069		4	4	2	2	0	1	5	1	1	4													Sm_mito_tRNA3.1	1.97786	2.03619	1.04579	1.06049	0	3.05338	22.4926	3.99329	6.11412	8.31262
Sm_mito_tRNA4.1	mitochondria	468	539	0.071		0	5	0	14	0	0	0	0	0	0													Sm_mito_tRNA4.1	0	2.47354	0	7.21429	0	0	0	0	0	0
Sm_mito_tRNA5.1	mitochondria	540	604	0.064		0	0	2	0	0	0	0	0	0	0													Sm_mito_tRNA5.1	0	0	1.12749	0	0	0	0	0	0	0
Sm_mito_tRNA6.1	mitochondria	2491	2564	0.073		40	12	17	60	7	13	7	8	14	40													Sm_mito_tRNA6.1	18.6948	5.77386	8.40211	30.0713	21.4145	37.5189	29.7641	30.1959	80.9074	78.5714
Sm_mito_tRNA7.1	mitochondria	3620	3679	0.059		0	0	0	0	0	0	0	0	0	0													Sm_mito_tRNA7.1	0	0	0	0	0	0	0	0	0	0
Sm_mito_tRNA8.1	mitochondria	3626	3685	0.059		0	0	0	0	0	0	0	0	0	0													Sm_mito_tRNA8.1	0	0	0	0	0	0	0	0	0	0
Sm_mito_tRNA9.1	mitochondria	5507	5571	0.064		4032	1446	1617	5382	0	0	0	0	0	0													Sm_mito_tRNA9.1	2149.43	793.59	911.575	3076.72	0	0	0	0	0	0
Smp_000020	Chr_1.unplaced.SC_0010	2527691	2553058	25.367		3292	4460	3896	3659	482	500	269	280	340	799													Smp_000020	4.42766	6.17552	5.5413	5.27736	4.24337	4.1527	3.29156	3.04137	5.65448	4.51653
Smp_000030	Chr_1.unplaced.SC_0010	2568817	2579229	10.412		17357	24766	17685	13353	3252	3244	1799	2247	1404	4440													Smp_000030	56.8754	83.5468	61.282	46.9211	69.7508	65.6412	53.6309	59.4633	56.8874	61.1471
Smp_000040	Chr_1.unplaced.SC_0010	2589634	2601091	11.457		2619	3626	3010	1756	1116	1134	571	664	391	1432													Smp_000040	7.79917	11.1164	9.4789	5.6076	21.7533	20.8532	15.4698	15.969	14.3976	17.9225
Smp_000050	Chr_1.unplaced.SC_0010	2670818	2730289	59.471		373	410	867	934	520	604	20	27	10	1129													Smp_000050	0.213987	0.242151	0.525988	0.5746	1.95268	2.13974	0.104386	0.125095	0.0709378	2.72217
Smp_000070	Chr_1.unplaced.SC_0010	2736439	2739738	3.299		2422	2583	2660	2872	325	364	401	311	272	404													Smp_000070	25.0481	27.5011	29.0912	31.8512	22.0006	23.246	37.7294	25.9752	34.7832	17.5601
Smp_000075	Chr_1.unplaced.SC_0010	2745932	2755972	10.04		1	0	9	2	0	0	0	0	0	0													Smp_000075	0.00339821	0	0.0323423	0.0072882	0	0	0	0	0	0
Smp_000080	Chr_1.unplaced.SC_0010	2774643	2783702	9.059		1265	1022	994	651	206	207	154	184	89	307													Smp_000080	4.76424	3.96259	3.95884	2.6292	5.07831	4.81415	5.27665	5.59652	4.1447	4.85943
Smp_000090	Chr_1.unplaced.SC_0010	2784503	2786863	2.36		197	127	244	345	28	22	7	10	2	43													Smp_000090	2.84799	1.89016	3.73027	5.34849	2.64959	1.96399	0.92067	1.16753	0.35752	2.61266
Smp_000100	Chr_3.unplaced.SC_0044	1255638	1349001	93.363		8223	13761	12872	4806	3395	2766	243	325	234	3927													Smp_000100	3.00496	5.17706	4.97432	1.88336	8.12078	6.24176	0.807885	0.959155	1.05736	6.03133
Smp_000110	Chr_3.unplaced.SC_0044	1217536	1251398	33.862		871	1086	1443	1707	179	210	149	172	92	214													Smp_000110	0.877585	1.12648	1.5375	1.84436	1.18052	1.30658	1.36581	1.39957	1.14619	0.906209
Smp_000120	Chr_3.unplaced.SC_0044	1215494	1215802	0.308		0	0	0	0	0	0	0	0	0	0													Smp_000120	0	0	0	0	0	0	0	0	0	0
Smp_000130	Chr_3.unplaced.SC_0044	1169317	1185844	16.527		919	1111	2146	1975	660	743	137	190	124	1131													Smp_000130	1.89716	2.36117	4.68487	4.37217	8.91831	9.47162	2.57303	3.16767	3.16527	9.81286
Smp_000140	Chr_3.unplaced.SC_0044	1153049	1160563	7.514		1922	1699	1934	2984	198	196	100	157	116	314													Smp_000140	8.72702	7.94201	9.2864	14.5295	5.88473	5.49559	4.13092	5.75717	6.51283	5.99219
Smp_000150	Chr_3.unplaced.SC_0044	1136317	1147777	11.46		2414	3077	3494	2931	564	529	237	463	237	830													Smp_000150	7.18681	9.43085	11.0002	9.35739	10.9907	9.72525	6.41921	11.1321	8.72462	10.3853
Smp_000160	Chr_3.unplaced.SC_0044	876924	879314	2.39		261	368	734	370	123	183	9	14	21	226													Smp_000160	3.72586	5.40826	11.0805	5.66406	11.4932	16.1318	1.16886	1.61403	3.70684	13.5593
Smp_000170	Chr_3.unplaced.SC_0044	759385	765434	6.049		239	201	186	104	30	34	0	1	0	62													Smp_000170	1.34802	1.16713	1.10941	0.629033	1.10757	1.1842	0	0.0455509	0	1.46972
Smp_000180	Chr_3.unplaced.SC_0044	747587	754525	6.938		35	23	21	5	23	17	0	0	1	57													Smp_000180	0.172114	0.11644	0.109206	0.0263669	0.740331	0.516231	0	0	0.0608063	1.17806
Smp_000190	Chr_3.unplaced.SC_0044	685360	698291	12.931		1289	1570	2940	2664	1133	1228	559	715	555	1352													Smp_000190	3.40098	4.26457	8.20309	7.53747	19.5673	20.0076	13.4183	15.2354	18.1069	14.9924
Smp_000200	Chr_3.unplaced.SC_0044	642897	661037	18.14		476	470	702	578	92	119	44	65	51	118													Smp_000200	0.895268	0.910057	1.39625	1.16577	1.13262	1.3821	0.752893	0.987316	1.18609	0.932764
Smp_000210	Chr_3.unplaced.SC_0044	564649	572728	8.079		0	3	4	3	1	1	3	4	0	8													Smp_000210	0	0.0130428	0.0178634	0.0135859	0.0276424	0.0260779	0.115261	0.136421	0	0.141991
Smp_000220	Chr_3.unplaced.SC_0044	552263	563105	10.842		114	192	551	360	53	63	29	36	30	80													Smp_000220	0.358739	0.622013	1.8336	1.21483	1.09169	1.22422	0.830246	0.914899	1.16733	1.05805
Smp_000230	Chr_3.unplaced.SC_0044	541872	551445	9.573		212	545	982	563	189	207	121	146	48	164													Smp_000230	0.755564	1.99966	3.70106	2.15171	4.40906	4.55567	3.92334	4.20228	2.11532	2.45653
Smp_000240	Chr_3.unplaced.SC_0044	524523	531780	7.257		24839	27588	19975	17322	2556	2694	2326	2341	1346	2294													Smp_000240	116.778	133.528	99.3097	87.3302	78.6568	78.2114	99.488	88.8842	78.2476	45.3277
Smp_000250	Chr_3.unplaced.SC_0044	510204	513676	3.472		0	0	0	0	0	0	0	0	0	0													Smp_000250	0	0	0	0	0	0	0	0	0	0
Smp_000260	Chr_3.unplaced.SC_0044	463559	489677	26.118		10611	17176	21098	15538	11227	15590	4651	4683	3338	15398													Smp_000260	13.8612	23.0988	29.145	21.766	95.9967	125.758	55.2745	49.4043	53.9175	84.5379
Smp_000270	Chr_3.unplaced.SC_0044	445086	446073	0.987		9	3	1	0	14	4	1451	1828	1149	0													Smp_000270	0.311106	0.106761	0.0365549	0	3.1677	0.853832	456.319	510.316	491.118	0
Smp_000280	Chr_3.unplaced.SC_0044	432016	432966	0.95		1	0	1	0	26	8	5246	5810	4268	8													Smp_000280	0.0359137	0	0.0379786	0	6.11199	1.77417	1714.05	1685.13	1895.33	1.20752
Smp_000290	Chr_3.unplaced.SC_0044	427181	427897	0.716		13	13	11	2	5	2	416	523	315	7													Smp_000290	0.619461	0.637732	0.554296	0.102198	1.55952	0.5885	180.343	201.265	185.601	1.40188
Smp_000300	Chr_3.unplaced.SC_0044	323093	371653	48.56		292	334	534	874	204	216	12	31	19	327													Smp_000300	0.205158	0.241588	0.396757	0.658501	0.938175	0.93714	0.0767045	0.175899	0.165066	0.965598
Smp_000310	Chr_3.unplaced.SC_0044	312288	317585	5.297		2174	2182	2289	2405	481	619	361	438	389	907													Smp_000310	14.0027	14.4688	15.5911	16.6115	20.2791	24.6201	21.1541	22.7837	30.9815	24.553
Smp_000320	Chr_3.unplaced.SC_0044	253351	280825	27.474		800	830	1255	987	335	371	46	51	43	373													Smp_000320	0.993463	1.06112	1.6481	1.31437	2.72305	2.845	0.519702	0.51148	0.660282	1.94677
Smp_000330	SC_0187	128654	128734	0.08		0	0	0	0	0	0	0	0	0	0													Smp_000330	0	0	0	0	0	0	0	0	0	0
Smp_000340	Chr_3.unplaced.SC_0044	101035	155991	54.956		16	42	79	77	30	31	160	118	86	31													Smp_000340	0.00993318	0.0268437	0.051865	0.0512624	0.12191	0.118844	0.903697	0.591626	0.660186	0.0808861
Smp_000350	Chr_3.unplaced.SC_0044	40704	73005	32.301		0	5	9	1	12	10	0	1	6	10													Smp_000350	0	0.00543703	0.0100528	0.00113268	0.0829656	0.0652249	0	0.0085303	0.0783643	0.0443927
Smp_000370	Chr_3.unplaced.SC_0044	1771	19942	18.171		0	0	1	1	0	0	8	23	20	1													Smp_000370	0	0	0.00198556	0.00201347	0	0	0.136656	0.348762	0.464338	0.00789129
Smp_000380	SC_0113	877491	877946	0.455		1	2	3	5	1	1	0	1	0	0													Smp_000380	0.0749846	0.154393	0.237888	0.402052	0.490819	0.46304	0	0.605576	0	0
Smp_000390	SC_0113	873116	873969	0.853		0	0	0	0	21	3	3036	3958	2426	1													Smp_000390	0	0	0	0	5.49798	0.740972	1104.77	1278.52	1199.84	0.168104
Smp_000400	SC_0113	868615	869432	0.817		0	0	0	0	2	0	618	784	502	0													Smp_000400	0	0	0	0	0.546689	0	234.793	264.408	259.218	0
Smp_000410	SC_0113	859598	866962	7.364		1	0	0	5	12	9	3680	4435	3149	6													Smp_000410	0.00463308	0	0	0.0248416	0.363915	0.257489	155.114	165.943	180.402	0.116833
Smp_000420	SC_0113	830802	832028	1.226		0	0	1	0	69	18	11251	13112	10845	48													Smp_000420	0	0	0.0294287	0	12.5687	3.09323	2848.52	2946.85	3731.83	5.61407
Smp_000430	SC_0113	814228	823997	9.769		0	0	0	0	59	27	13481	16799	11149	29													Smp_000430	0	0	0	0	1.34876	0.582295	428.341	473.82	481.469	0.425672
Smp_000440	SC_0113	796224	808185	11.961		3136	3703	3112	2334	405	379	452	523	369	597													Smp_000440	8.94524	10.8741	9.38716	7.13932	7.56171	6.67577	11.7298	12.048	13.0149	7.15705
Smp_000460	SC_0113	789025	791596	2.571		4387	8360	5404	2059	885	864	686	946	970	2007													Smp_000460	58.2169	114.212	75.836	29.3007	76.873	70.8013	82.8209	101.384	159.167	111.937
Smp_000470	SC_0113	761236	768587	7.351		1136	1074	1960	2804	248	326	120	175	166	438													Smp_000470	5.27249	5.13175	9.61993	13.9558	7.53421	9.34331	5.06702	6.55952	9.52675	8.54387
Smp_000480	SC_0113	709282	733307	24.025		7560	8600	8607	6181	1026	937	759	1057	645	1326													Smp_000480	10.736	12.5731	12.9256	9.4128	9.5371	8.21686	9.8061	12.1225	11.3261	7.9142
Smp_000500	SC_0113	671841	680550	8.709		0	0	1	0	0	1	21	18	6	0													Smp_000500	0	0	0.0041428	0	0	0.0241914	0.748461	0.569488	0.290647	0
Smp_000510	SC_0113	648124	662086	13.962		1240	1243	1280	1583	154	147	85	75	49	222													Smp_000510	3.0301	3.12703	3.30769	4.14817	2.46323	2.21819	1.88969	1.48011	1.48058	2.27999
Smp_000520	SC_0113	631207	633840	2.633		632	674	1278	1234	160	176	78	88	124	398													Smp_000520	8.18936	8.99119	17.5123	17.147	13.5707	14.0829	9.19521	9.20899	19.868	21.675
Smp_000530	SC_0113	538645	619674	81.029		1012	1984	3035	1994	1874	2218	428	507	302	2597													Smp_000530	0.426112	0.860021	1.35139	0.900344	5.1649	5.76701	1.63954	1.72404	1.57235	4.59577
Smp_000540	SC_0113	464181	494076	29.895		0	0	0	3	0	1	0	0	0	3													Smp_000540	0	0	0	0.00367152	0	0.00704743	0	0	0	0.0143896
Smp_000550	SC_0113	453890	462699	8.809		0	0	4	2	0	0	0	0	0	0													Smp_000550	0	0	0.0163831	0.00830667	0	0	0	0	0	0
Smp_000560	SC_0113	414904	431772	16.868		0	0	0	0	0	0	0	0	0	0													Smp_000560	0	0	0	0	0	0	0	0	0	0
Smp_000580	SC_0113	365430	375993	10.563		26	12	48	80	32	63	9	18	6	103													Smp_000580	0.0839788	0.0399027	0.163952	0.277094	0.676543	1.25656	0.264468	0.469532	0.239633	1.39822
Smp_000590	SC_0113	351639	355825	4.186		3547	2740	4126	4602	333	332	207	230	173	580													Smp_000590	28.9098	22.9911	35.5625	40.2227	17.7655	16.7097	15.3493	15.1394	17.4353	19.8681
Smp_000600	SC_0113	313718	331786	18.068		2532	3037	2729	1894	195	154	257	282	225	279													Smp_000600	4.7812	5.90395	5.44949	3.83525	2.41022	1.79573	4.41511	4.3005	5.25358	2.21422
Smp_000610	SC_0113	304891	313605	8.714		163	148	146	233	9	10	7	4	5	5													Smp_000610	0.638195	0.596557	0.604502	0.978278	0.230652	0.241775	0.249344	0.12648	0.242067	0.0822772
Smp_000620	SC_0113	302091	302822	0.731		27	23	44	42	0	1	0	0	1	4													Smp_000620	1.26017	1.10514	2.17169	2.10211	0	0.288212	0	0	0.577119	0.784639
Smp_000630	SC_0113	294987	299693	4.706		383	284	389	472	34	34	8	14	6	26													Smp_000630	2.77671	2.1197	2.98236	3.66956	1.61347	1.52215	0.527662	0.819703	0.537876	0.792225
Smp_000640	SC_0113	288908	294275	5.367		2279	1680	2300	3506	342	395	270	251	167	527													Smp_000640	14.4876	10.9948	15.4617	23.9003	14.2307	15.5058	15.6153	12.8861	13.1271	14.0801
Smp_000650	SC_0113	240626	252159	11.533		930	1419	1907	1323	180	195	117	164	141	327													Smp_000650	2.75121	4.32163	5.96583	4.19702	3.48548	3.56223	3.14892	3.91816	5.15774	4.06567
Smp_000660	SC_0113	206493	222136	15.643		3236	6486	4389	2322	3819	4135	3007	3344	2631	5753													Smp_000660	7.05784	14.5635	10.123	5.43083	54.5208	55.691	59.6666	58.9015	70.9551	52.7353
Smp_000670	SC_0113	172940	190307	17.367		2253	2708	3985	2623	844	990	380	455	309	1701													Smp_000670	4.42609	5.47686	8.27877	5.52583	10.853	12.0099	6.79168	7.21883	7.50614	14.0445
Smp_000680	SC_0113	163023	166984	3.961		1437	1717	1758	1389	145	172	123	141	89	258													Smp_000680	12.3776	15.2256	16.0131	12.8298	8.17515	9.14857	9.6387	9.80832	9.47912	9.33989
Smp_000690	SC_0113	148391	149533	1.142		0	0	8	12	1	2	1	1	1	3													Smp_000690	0	0	0.252747	0.384449	0.195554	0.368972	0.271802	0.241276	0.369417	0.376688
Smp_000700	SC_0113	125481	139636	14.155		581	859	1117	1364	358	416	116	124	95	436													Smp_000700	1.40039	2.13153	2.84712	3.52556	5.64814	6.19174	2.5437	2.41375	2.83137	4.41676
Smp_000710	SC_0113	118684	122954	4.27		1738	1483	3044	3056	480	502	267	399	255	642													Smp_000710	13.8869	12.1989	25.7205	26.1848	25.1042	24.7688	19.4089	25.7469	25.1939	21.5593
Smp_000720	SC_0113	83426	101509	18.083		2986	4715	6002	4541	802	807	548	769	457	1343													Smp_000720	5.63382	9.15839	11.9753	9.18766	9.90459	9.40227	9.4065	11.7175	10.6618	10.6496
Smp_000730	SC_0113	54923	60298	5.375		345	578	780	567	96	104	71	46	50	204													Smp_000730	2.1899	3.77709	5.23574	3.85948	3.98864	4.07647	4.10013	2.35809	3.92441	5.44225
Smp_000740	Chr_1	65357547	65363463	5.916		25805	26771	17602	12590	1847	1835	1400	1570	847	2028													Smp_000740	148.819	158.944	107.349	77.8612	69.7222	65.3488	73.4544	73.1226	60.4002	49.1549
Smp_000755	Chr_1	65280744	65352631	71.887		595	1158	1726	575	487	612	312	275	206	671													Smp_000755	0.282391	0.565804	0.866269	0.292645	1.5129	1.79362	1.34717	1.05405	1.20893	1.33844
Smp_000770	Chr_1	65267837	65268937	1.1		0	0	0	0	0	0	0	0	0	0													Smp_000770	0	0	0	0	0	0	0	0	0	0
Smp_000780	Chr_1	65187356	65239369	52.013		333	503	752	498	85	120	41	54	45	171													Smp_000780	0.218432	0.339675	0.521637	0.350301	0.364955	0.48607	0.244675	0.286063	0.364992	0.471424
Smp_000790	Chr_1	65148053	65172102	24.049		56	110	115	57	21	57	17	20	24	65													Smp_000790	0.0794465	0.160658	0.172529	0.0867165	0.195009	0.499353	0.219417	0.229146	0.421015	0.387564
Smp_000810	Chr_1	65118379	65121754	3.375		2236	1867	2747	3265	136	131	62	109	45	154													Smp_000810	22.6038	19.4303	29.3662	35.3943	8.99907	8.17762	5.70212	8.89883	5.62499	6.54296
Smp_000820	Chr_1	65075124	65075581	0.457		648	893	1327	427	1542	1670	296	291	126	1359													Smp_000820	48.3774	68.6346	104.765	34.185	753.53	769.892	201.045	175.451	116.315	426.413
Smp_000830	Chr_1	65034843	65058900	24.057		24	19	43	23	0	0	0	1	0	8													Smp_000830	0.0340372	0.0277409	0.0644895	0.0349792	0	0	0	0.0114535	0	0.0476843
Smp_000850	Chr_1	64972709	64987161	14.452		2278	2063	1924	1596	595	755	1031	936	551	1012													Smp_000850	5.37786	5.01394	4.8033	4.04044	9.19436	11.0065	22.1436	17.8455	16.0845	10.0411
Smp_000870	Chr_1	64920071	64962307	42.236		434	457	690	862	207	224	44	51	26	279													Smp_000870	0.350583	0.380051	0.589425	0.746704	1.09451	1.11736	0.323361	0.332711	0.259701	0.947215
Smp_000880	Chr_1	64899137	64899786	0.649		55046	41993	30544	33995	2229	1858	2180	2561	821	1958													Smp_000880	2893.77	2272.69	1698.02	1916.43	767.005	603.157	1042.63	1087.29	533.681	432.609
Smp_000890	Chr_1	64878211	64883937	5.726		984	1558	1568	1261	183	184	99	149	107	230													Smp_000890	5.8631	9.55705	9.88	8.05726	7.13727	6.77011	5.36663	7.16993	7.88343	5.75975
Smp_000900	Chr_1	64789242	64792098	2.856		6	1	18	10	11	15	8	6	8	19													Smp_000900	0.0716765	0.0122984	0.227393	0.128105	0.860136	1.10653	0.869461	0.57886	1.18172	0.953943
Smp_000910	Chr_1	64688876	64748274	59.398		78	47	126	209	24	39	3	1	1	58													Smp_000910	0.0448029	0.0277929	0.0765351	0.128735	0.0902344	0.138332	0.0156772	0.00463883	0.0071025	0.140018
Smp_000950	Chr_1	64637742	64639768	2.026		116	144	159	63	3	2	99	123	68	5													Smp_000950	1.95345	2.4965	2.83152	1.13769	0.330685	0.207979	15.1675	16.7281	14.1596	0.353881
Smp_000970	Chr_1	64577422	64600068	22.646		0	0	0	0	0	0	0	0	0	0													Smp_000970	0	0	0	0	0	0	0	0	0	0
Smp_000980	Chr_1	64575995	64577224	1.229		12660	10852	12790	12154	989	1079	601	591	395	1197													Smp_000980	351.452	310.146	375.475	361.819	179.712	184.969	151.789	132.5	135.59	139.659
Smp_000990	Chr_1	64547420	64575715	28.295		725	983	1217	606	313	437	134	218	104	631													Smp_000990	0.874202	1.22026	1.55183	0.783586	2.4704	3.25388	1.46999	2.12289	1.55062	3.19777
Smp_001000	Chr_1	64514614	64515577	0.963		1148	757	740	561	105	66	20	36	8	78													Smp_001000	40.6723	27.6107	27.7248	21.3138	24.3498	14.4393	6.44647	10.3005	3.50467	11.6144
Smp_001020	Chr_1	64461775	64472240	10.465		186	201	340	360	70	51	6	33	30	117													Smp_001020	0.606397	0.674629	1.1722	1.2586	1.4938	1.02674	0.177963	0.86887	1.20939	1.60315
Smp_001030	Chr_1	64404702	64446238	41.536		1636	1632	1826	1232	119	128	58	57	54	189													Smp_001030	1.34382	1.38008	1.58613	1.0852	0.639816	0.649254	0.433432	0.378121	0.548469	0.652476
Smp_001040	Chr_1	64368679	64391526	22.847		6337	9937	9039	4542	3797	3998	692	992	579	5777													Smp_001040	9.4632	15.2769	14.2743	7.27347	37.1145	36.8675	9.40145	11.9636	10.6913	36.2577
Smp_001050	Chr_1	64336438	64357604	21.166		2	10	15	6	0	0	0	2	0	0													Smp_001050	0.00322385	0.0165947	0.0255691	0.0103714	0	0	0	0.0260358	0	0
Smp_001070	Chr_1	64165239	64230896	65.657		22	18	41	17	30	33	3	6	3	65													Smp_001070	0.0114321	0.0096294	0.0225302	0.00947309	0.102041	0.105892	0.0141827	0.0251797	0.0192763	0.141958
Smp_001080	Chr_1	64159353	64160029	0.676		1319	909	1512	1935	408	400	103	110	52	461													Smp_001080	66.5705	47.2308	80.6988	104.727	134.786	124.665	47.2943	44.8359	32.4519	97.787
Smp_001085	Chr_1	64154973	64155944	0.971		6	13	25	6	0	2	0	3	0	0													Smp_001085	0.210822	0.470254	0.92893	0.226077	0	0.433951	0	0.851299	0	0
Smp_001090	Chr_1	64109298	64141323	32.025		1415	1555	2260	1472	187	198	118	144	121	389													Smp_001090	1.50748	1.70549	2.54614	1.68168	1.30402	1.30258	1.1437	1.23895	1.59397	1.74176
Smp_001095	Chr_1	64080993	64104028	23.035		437	446	825	784	138	108	67	88	75	161													Smp_001095	0.647257	0.680072	1.29219	1.24524	1.3379	0.987791	0.902827	1.05263	1.37359	1.00222
Smp_001100	Chr_1	63979857	64067977	88.12		3379	3089	6599	4233	1229	941	160	298	187	1675													Smp_001100	1.30827	1.23126	2.70188	1.75751	3.11466	2.2498	0.56359	0.931799	0.895262	2.72563
Smp_001120	Chr_1	63968808	63972571	3.763		456	317	663	701	57	71	47	29	31	61													Smp_001120	4.13442	2.95892	6.35684	6.81565	3.38278	3.97515	3.87687	2.12346	3.47544	2.32446
Smp_001150	Chr_1	63864753	63871268	6.515		2681	2242	4010	4514	517	566	385	499	267	768													Smp_001150	14.04	12.0873	22.2071	25.3496	17.7218	18.3034	18.3428	21.1041	17.2894	16.9034
Smp_001160	Chr_1	63831768	63850453	18.685		134	114	145	172	10	20	3	14	2	42													Smp_001160	0.244678	0.214299	0.279987	0.33679	0.11952	0.22551	0.0498364	0.20645	0.0451565	0.322317
Smp_001170	Chr_1	63790748	63823179	32.431		8297	11753	7873	4084	1058	947	1032	1218	710	1796													Smp_001170	8.7286	12.7291	8.75875	4.60733	7.28548	6.15204	9.87728	10.3483	9.23594	7.94096
Smp_001180	Chr_1	63725450	63790318	64.868		1151	2309	3301	1926	376	434	168	290	183	900													Smp_001180	0.60538	1.25026	1.83602	1.0863	1.29446	1.40958	0.803891	1.23182	1.19015	1.98948
Smp_001210	Chr_2	32496337	32519525	23.188		231	313	597	420	22	46	39	50	44	47													Smp_001210	0.339885	0.474121	0.928909	0.662689	0.211881	0.41795	0.522059	0.594137	0.80052	0.290644
Smp_001280	Chr_2	32160728	32184490	23.762		0	0	0	1	0	0	0	0	0	0													Smp_001280	0	0	0	0.00153972	0	0	0	0	0	0
Smp_001330	Chr_2	32045431	32045826	0.395		0	2	1	1	0	0	0	0	0	0													Smp_001330	0	0.177845	0.0913409	0.0926247	0	0	0	0	0	0
Smp_001360	SC_0799	2794	6392	3.598		11276	9397	10372	10118	751	825	482	557	384	1150													Smp_001360	106.925	91.7352	104.007	102.886	46.6135	48.3084	41.5819	42.6554	45.0249	45.8315
Smp_001390	Chr_2	31748772	31763425	14.653		1076	1503	1928	1246	191	245	64	91	103	474													Smp_001390	2.50536	3.6028	4.74726	3.11111	2.91098	3.52265	1.35572	1.71118	2.96547	4.63851
Smp_001410	Chr_2	31577081	31589031	11.95		1603	1255	2438	2839	648	655	528	686	391	1054													Smp_001410	4.57667	3.68879	7.36085	8.69203	12.1099	11.5479	13.7146	15.8174	13.8036	12.6474
Smp_001420	Chr_2.unplaced.SC_0193	471427	484914	13.487		359	386	535	333	139	133	80	60	36	163													Smp_001420	0.908161	1.00526	1.4312	0.903343	2.30161	2.07762	1.84117	1.22579	1.12608	1.733
Smp_001430	Chr_2.unplaced.SC_0193	452499	453287	0.788		4008	2801	4122	8368	231	216	164	174	121	255													Smp_001430	173.534	124.852	188.731	388.525	65.4664	57.7507	64.6005	60.842	64.7802	46.4025
Smp_001500	Chr_2	17870429	17874246	3.817		9333	8085	9569	9826	1177	1095	862	938	585	1906													Smp_001500	83.4224	74.3988	90.4496	94.1843	68.8632	60.4396	70.0976	67.7113	64.6572	71.6024
Smp_001520	Chr_2	17897027	17897890	0.863		323	224	561	790	57	79	33	35	42	147													Smp_001520	12.7695	9.11686	23.4539	33.4919	14.7502	19.2862	11.8692	11.1747	20.5315	24.4249
Smp_001530	Chr_2	17920211	17942418	22.207		2042	2596	2952	2308	569	597	200	276	118	711													Smp_001530	3.13725	4.10604	4.7961	3.8025	5.72209	5.66388	2.79549	3.42452	2.24169	4.59099
Smp_001560	Chr_2	18053778	18063146	9.368		145	147	308	235	101	105	12	14	18	182													Smp_001560	0.528086	0.551161	1.18622	0.917793	2.40773	2.36141	0.397606	0.411776	0.810604	2.78581
Smp_001590	Chr_2	18182313	18187827	5.514		2145	2002	2900	2798	221	268	162	194	120	401													Smp_001590	13.2722	12.7528	18.9755	18.5654	8.95072	10.2399	9.1194	9.69427	9.18116	10.4281
Smp_001610	Chr_2	18215967	18219313	3.346		372	299	640	595	76	103	21	20	10	156													Smp_001610	3.79316	3.13872	6.90107	6.50601	5.07248	6.48546	1.9481	1.64696	1.26083	6.68537
Smp_001640	Chr_2	18357850	18358448	0.598		2486	1975	2273	2407	537	579	274	288	309	806													Smp_001640	141.835	116.004	137.139	147.265	200.542	203.989	142.222	132.7	217.992	193.268
Smp_001780	Chr_2	18770571	18785114	14.543		198	252	409	304	107	215	14	36	55	265													Smp_001780	0.46451	0.608632	1.01469	0.764792	1.64309	3.11468	0.298808	0.68207	1.59548	2.61288
Smp_001830	Chr_6	1777804	1779029	1.225		17617	13260	21792	21519	2003	1751	2396	2846	1669	3006													Smp_001830	490.659	380.203	641.835	642.702	365.155	301.148	607.112	640.146	574.782	351.868
Smp_001890	Chr_6	1938426	1945900	7.474		0	0	0	0	0	0	0	0	0	0													Smp_001890	0	0	0	0	0	0	0	0	0	0
Smp_001900	Chr_6	2014063	2067280	53.217		0	0	0	3	0	3	3	3	4	3													Smp_001900	0	0	0	0.0020625	0	0.0118768	0.017498	0.0155328	0.0317097	0.00808347
Smp_001940	Chr_ZW	37658500	37666355	7.855		598	505	778	1210	273	357	116	143	149	430													Smp_001940	2.5974	2.25815	3.57352	5.63589	7.76156	9.57528	4.58385	5.01615	8.00245	7.84963
Smp_001950	Chr_6	2260505	2276438	15.933		3345	2597	6374	5990	462	474	91	99	97	988													Smp_001950	7.16279	5.72509	14.4337	13.7548	6.47556	6.26773	1.77281	1.71206	2.56837	8.89173
Smp_001960	Chr_6	2282022	2296128	14.106		2159	2030	2876	2467	275	310	155	227	167	446													Smp_001960	5.22195	5.05476	7.35609	6.39866	4.35373	4.63007	3.41072	4.43407	4.99454	4.53376
Smp_001980	Chr_6	2360845	2373016	12.171		7	2	15	3	1	1	0	1	1	8													Smp_001980	0.0196225	0.00577181	0.0444659	0.00901818	0.0183487	0.0173102	0	0.0226388	0.0346622	0.0942521
Smp_002010	Chr_6	2444113	2447332	3.219		1563	1140	1678	1799	99	81	125	88	90	127													Smp_002010	16.5662	12.4392	18.8076	20.4472	6.86826	5.30144	12.0533	7.53255	11.7952	5.65731
Smp_002060	Chr_6	2567283	2576393	9.11		0	0	1	0	0	0	0	0	0	1													Smp_002060	0	0	0.00396044	0	0	0	0	0	0	0.0157401
Smp_002070	Chr_6	2584632	2590619	5.987		0	0	0	0	0	0	0	3	0	0													Smp_002070	0	0	0	0	0	0	0	0.138068	0	0
Smp_002080	Chr_6	2609123	2619215	10.092		12934	12608	10500	7833	508	446	1008	1105	666	647													Smp_002080	43.7259	43.881	37.5383	28.3971	11.2414	9.3108	31.0028	30.1693	27.8407	9.19293
Smp_002100	Chr_6	3115303	3118224	2.921		2408	1795	2093	2641	1118	1367	209	224	141	1244													Smp_002100	28.126	21.5844	25.8523	33.0796	85.4757	98.5976	22.2092	21.1299	20.3643	61.0683
Smp_002150	Chr_6	3282737	3297493	14.756		1112	2223	2458	521	2027	3185	483	540	398	4432													Smp_002150	2.5711	5.2915	6.01001	1.29179	30.6773	45.4748	10.1601	10.0834	11.3788	43.0683
Smp_002160	Chr_6	3301187	3320010	18.823		1498	1977	2053	1749	191	188	168	255	144	360													Smp_002160	2.71523	3.68915	3.93516	3.39958	2.26609	2.10426	2.77038	3.73277	3.22743	2.74246
Smp_002180	Chr_6	3382451	3385063	2.612		11336	8798	13539	14563	1573	1317	1183	1334	753	1557													Smp_002180	148.071	118.309	187.015	203.986	134.489	106.229	140.582	140.722	121.62	85.4757
Smp_002190	Chr_6	3400717	3404328	3.611		1774	2176	2367	1572	184	183	179	133	73	212													Smp_002190	16.7614	21.166	23.6501	15.9275	11.3795	10.6771	15.3866	10.1486	8.52861	8.41851
Smp_002230	Chr_6	3519717	3532438	12.721		1389	1744	1906	1492	347	359	257	332	281	410													Smp_002230	3.72533	4.81541	5.40585	4.29113	6.09173	5.9457	6.2709	7.19113	9.31897	4.62157
Smp_002280	Chr_6	3793197	3828396	35.199		3497	4673	5668	3898	985	1067	460	568	293	1376													Smp_002280	3.3896	4.66309	5.80981	4.05168	6.2494	6.38651	4.05645	4.44629	3.51172	5.60551
Smp_002350	Chr_2.unplaced.SC_0171	494637	512997	18.36		48	99	195	85	2	11	0	1	2	6													Smp_002350	0.0891974	0.189396	0.383199	0.169383	0.0243271	0.126226	0	0.0150075	0.0459558	0.0468604
Smp_002380	Chr_2.unplaced.SC_0171	228111	229203	1.092		2663	2779	3179	2325	401	399	170	199	143	655													Smp_002380	83.2017	89.3869	105.034	77.8976	82.0076	76.9803	48.3219	50.2124	55.2454	86.0094
Smp_002390	Chr_2.unplaced.SC_0171	223665	224219	0.554		0	1	6	3	2	0	1	0	0	0													Smp_002390	0	0.0634013	0.390754	0.198123	0.806219	0	0.560284	0	0	0
Smp_002410	Chr_2.unplaced.SC_0171	128616	131145	2.529		27246	25953	24289	20964	2058	1782	1804	1988	1160	2102													Smp_002410	367.568	360.451	346.516	303.284	181.731	148.453	221.414	216.595	193.505	119.182
Smp_002470	Chr_3	15319150	15319464	0.314		0	0	1	0	0	0	0	0	0	0													Smp_002470	0	0	0.114903	0	0	0	0	0	0	0
Smp_002500	Chr_3	15284439	15284747	0.308		0	0	0	0	0	0	0	0	0	0													Smp_002500	0	0	0	0	0	0	0	0	0	0
Smp_002510	Chr_3	15270298	15280223	9.925		4069	4266	4068	2943	381	366	473	677	307	501													Smp_002510	13.9875	15.0973	14.7881	10.8488	8.57289	7.76927	14.7927	18.7948	13.0494	7.23826
Smp_002550	Chr_3	15186618	15188807	2.189		5873	3283	5870	7258	669	1025	551	843	417	1083													Smp_002550	91.5372	52.6785	96.7508	121.31	68.2516	98.6524	78.1311	106.111	80.3662	70.943
Smp_002600	Chr_3	15058201	15078252	20.051		1789	3283	4754	3412	3114	3667	3107	2902	2080	4623													Smp_002600	3.04409	5.75099	8.55432	6.22582	34.6829	38.5305	48.0976	39.8788	43.7633	33.0609
Smp_002630	Chr_3	24185015	24186918	1.903		0	0	0	0	0	0	0	0	0	0													Smp_002630	0	0	0	0	0	0	0	0	0	0
Smp_002640	Chr_3	14927124	14952715	25.591		81	167	238	109	90	97	4	4	11	218													Smp_002640	0.107989	0.229212	0.335546	0.155834	0.785394	0.798572	0.0485167	0.0430678	0.181338	1.22151
Smp_002740	Chr_6	3039477	3040596	1.119		4071	3953	3831	2965	258	256	343	383	282	387													Smp_002740	124.124	124.081	123.522	96.9434	51.4899	48.1992	95.1442	94.3081	106.317	49.5916
Smp_002810	Chr_6	2903236	2913488	10.252		1068	1092	1251	1382	72	71	68	53	57	71													Smp_002810	3.55424	3.7413	4.40262	4.932	1.5684	1.45908	2.05882	1.42445	2.34557	0.993063
Smp_002820	Chr_6	2896604	2903069	6.465		2599	2598	2885	3137	675	720	566	546	399	676													Smp_002820	13.7158	14.1149	16.1005	17.7529	23.3167	23.4635	27.1748	23.2704	26.0368	14.9936
Smp_002840	Chr_6	2870277	2884791	14.514		3222	3097	4787	6103	580	663	332	426	192	988													Smp_002840	7.57394	7.49483	11.8998	15.3844	8.92429	9.62401	7.10018	8.08728	5.58081	9.76106
Smp_002860	Chr_6	2814048	2816383	2.335		0	0	0	0	0	0	0	0	0	0													Smp_002860	0	0	0	0	0	0	0	0	0	0
Smp_002870	Chr_6	2800351	2804293	3.942		1923	1838	1618	1390	210	233	180	202	156	374													Smp_002870	16.6436	16.3771	14.8089	12.901	11.8969	12.4529	14.1734	14.1194	16.6952	13.6045
Smp_002880	Chr_6	2789807	2794137	4.33		54345	60590	36957	25494	3103	2939	3054	3615	1769	3445													Smp_002880	428.209	491.497	307.943	215.414	160.039	143.002	218.927	230.039	172.355	114.085
Smp_002920	Chr_6	2712094	2715746	3.652		610	620	1041	1403	120	235	48	29	46	331													Smp_002920	5.69879	5.96306	10.2845	14.0556	7.33809	13.5571	4.0797	2.188	5.31386	12.9964
Smp_002930	Chr_3	18141352	18141792	0.44		3984	2711	2045	2015	26	17	70	133	48	12													Smp_002930	308.923	216.414	167.688	167.551	13.1963	8.14003	49.3814	83.2874	46.0226	3.91071
Smp_002950	Chr_2	31503024	31503301	0.277		0	1	6	0	0	2	3	1	0	0													Smp_002950	0	0.126803	0.781508	0	0	1.52118	3.36171	0.994719	0	0
Smp_002960	Chr_2	31519167	31527593	8.426		735	815	1389	1065	160	195	148	183	114	285													Smp_002960	2.97611	3.39738	5.94762	4.62436	4.24064	4.87576	5.45203	5.98425	5.70777	4.8501
Smp_003000	Chr_4	17086843	17092229	5.386		804	855	1372	1390	217	202	201	214	140	316													Smp_003000	5.093	5.57581	9.19073	9.44218	8.99759	7.90159	11.5837	10.9478	10.9659	8.41294
Smp_003110	Chr_1	9253960	9263617	9.657		1719	2367	2060	777	1529	1628	130	172	239	5941													Smp_003110	6.0732	8.60922	7.69639	2.94376	35.3588	35.5174	4.17849	4.90757	10.4409	88.2154
Smp_003130	Chr_1	9109478	9117068	7.59		761	658	1277	1390	175	191	136	176	66	170													Smp_003130	3.42079	3.04503	6.07032	6.70034	5.14907	5.30177	5.5618	6.38927	3.66847	3.21169
Smp_003140	Chr_1	9077774	9097608	19.834		1104	1769	1519	1106	508	559	290	352	239	591													Smp_003140	1.89908	3.13275	2.76318	2.04018	5.71987	5.93787	4.53843	4.89004	5.08359	4.27272
Smp_003190	Chr_1	8860112	8865242	5.13		97	56	146	179	13	31	6	11	1	71													Smp_003190	0.645116	0.383423	1.02683	1.27661	0.565925	1.27313	0.363038	0.590821	0.0822367	1.98458
Smp_003230	Chr_1	8599604	8616274	16.67		2364	1799	2699	2634	959	1200	137	164	138	1219													Smp_003230	4.83833	3.79056	5.84157	5.78101	12.8474	15.1661	2.55096	2.71074	3.49242	10.4856
Smp_003250	Chr_1	8577770	8579038	1.268		959	802	1002	1587	170	210	68	99	76	244													Smp_003250	25.8038	22.2159	28.5109	45.7911	29.9407	34.8923	16.6459	21.5128	25.2858	27.5929
Smp_003270	Chr_7	3595396	3607358	11.962		370	430	507	260	74	111	52	65	50	166													Smp_003270	1.05531	1.26262	1.52921	0.795231	1.38153	1.95501	1.34933	1.49723	1.76339	1.9899
Smp_003280	Chr_1	8485675	8531767	46.092		0	4	18	14	3	7	6	2	8	8													Smp_003280	0	0.00304819	0.0140899	0.0111129	0.0145354	0.0319965	0.0404058	0.011956	0.073223	0.0248881
Smp_003300	Chr_1	8439153	8449532	10.379		0	0	0	0	0	0	0	0	0	0													Smp_003300	0	0	0	0	0	0	0	0	0	0
Smp_003330	Chr_1	8385121	8385777	0.656		770	571	1128	1241	86	92	41	41	48	155													Smp_003330	40.047	30.5732	62.0394	69.2136	29.277	29.547	19.3998	17.2211	30.8688	33.8809
Smp_003340	Chr_1	8341994	8373791	31.797		3380	4431	4516	3976	398	469	422	503	240	627													Smp_003340	3.62672	4.89467	5.12425	4.57492	2.79531	3.10754	4.1195	4.35875	3.18426	2.82754
Smp_003410	Chr_1	8123302	8124101	0.799		29344	25278	16704	15099	2068	1845	2492	2962	2388	3110													Smp_003410	1253.01	1111.23	754.286	691.393	578.011	486.496	968.098	1021.45	1260.87	558.137
Smp_003440	Chr_1	7961531	7991715	30.184		1249	1265	2385	1166	287	322	18	29	24	437													Smp_003440	1.41179	1.47205	2.85085	1.41334	2.12343	2.24755	0.185103	0.264729	0.335442	2.07602
Smp_003600	Chr_1	7151816	7153838	2.022		270	98	107	117	2	3	0	0	0	8													Smp_003600	4.55582	1.70237	1.90926	2.11704	0.220893	0.312586	0	0	0	0.56733
Smp_003610	Chr_1	7145840	7149622	3.782		5453	3107	3962	5578	508	694	77	120	46	621													Smp_003610	49.1924	28.8554	37.7968	53.9611	29.9968	38.6605	6.31957	8.74259	5.1312	23.5449
Smp_003620	Chr_1	7110354	7135324	24.97		1681	2242	2789	1575	466	498	179	252	128	706													Smp_003620	2.29685	3.15373	4.02988	2.30773	4.16773	4.20185	2.22512	2.78075	2.16259	4.05428
Smp_003630	Chr_1	7090959	7095966	5.007		4920	4721	5119	4991	631	699	422	508	418	1151													Smp_003630	33.5252	33.118	36.8867	36.4698	28.1439	29.4123	26.1609	27.9554	35.2194	32.9629
Smp_003660	Chr_1	7029930	7032906	2.976		23184	26537	17378	19231	2384	2351	1597	1819	1169	2282													Smp_003660	265.79	313.204	210.683	236.425	178.898	166.437	166.567	168.415	165.716	109.954
Smp_003670	Chr_1	7007233	7013618	6.385		1131	1409	2205	1839	168	204	75	76	108	444													Smp_003670	6.04346	7.75101	12.4598	10.5377	5.87599	6.7313	3.64602	3.27969	7.13585	9.97124
Smp_003700	Chr_1	6949663	6952163	2.5		7750	5594	5074	5789	289	316	292	313	284	644													Smp_003700	105.766	78.5942	73.2272	84.7203	25.8161	26.6303	36.2544	34.4973	47.9249	36.938
Smp_003710	Chr_5	556817	566918	10.101		6476	7291	8212	6352	1362	1517	602	696	507	2717													Smp_003710	21.8739	25.3531	29.3323	23.0075	30.1124	31.641	18.4991	18.9856	21.1752	38.5702
Smp_003760	Chr_1	6749491	6763310	13.819		116	96	269	389	8	3	2	1	5	1													Smp_003760	0.286395	0.244007	0.702325	1.0299	0.129284	0.0457377	0.0449233	0.019939	0.152643	0.0103765
Smp_003770	Chr_1	6748568	6749270	0.702		35422	53911	49053	27421	3153	2970	2019	1929	1680	6363													Smp_003770	1721.55	2697.42	2521.1	1429.12	1003.04	891.351	892.724	757.139	1009.61	1299.73
Smp_003790	Chr_1	6669810	6673454	3.644		0	0	28	24	0	0	2	0	0	1													Smp_003790	0	0	0.277231	0.240966	0	0	0.170361	0	0	0.0393504
Smp_003860	Chr_1	6318924	6323594	4.67		910	900	1637	1321	205	162	84	90	91	431													Smp_003860	6.64826	6.76914	12.6472	10.3493	9.80324	7.30849	5.58317	5.31014	8.22067	13.2339
Smp_003900	Chr_1	6135733	6180357	44.624		30	77	168	64	22	25	3	14	7	48													Smp_003900	0.022937	0.060608	0.135832	0.0524729	0.1101	0.118032	0.0208675	0.086445	0.0661778	0.154241
Smp_003930	Chr_1	6054346	6057162	2.816		333	229	305	262	56	70	8	7	8	123													Smp_003930	4.03455	2.85635	3.90777	3.40402	4.44107	5.23715	0.881811	0.684929	1.19851	6.26325
Smp_003940	Chr_1	6038131	6052244	14.113		355	472	531	541	70	64	52	77	32	87													Smp_003940	0.858208	1.17471	1.35749	1.4025	1.10767	0.955411	1.14367	1.50332	0.956563	0.883949
Smp_003970	Chr_1	5948588	5958047	9.459		12614	9312	9946	14321	1273	877	1706	2171	760	806													Smp_003970	45.4979	34.5785	37.9372	55.3926	30.0549	19.5337	55.9825	63.2404	33.8962	12.2185
Smp_003980	Chr_1	5891905	5946405	54.5		3424	2995	2831	3537	711	636	283	336	174	853													Smp_003980	2.14349	1.93023	1.87416	2.37445	2.91344	2.45861	1.61179	1.69872	1.3469	2.24429
Smp_003990	Chr_1	5855329	5867698	12.369		11912	10172	13101	11850	5562	4993	2815	2603	1213	4897													Smp_003990	32.8574	28.8855	38.2148	35.0516	100.422	85.0465	70.6418	57.9856	41.3723	56.7705
Smp_004000	Chr_1	5832660	5843032	10.372		861	708	1096	1519	65	42	65	113	76	134													Smp_004000	2.8322	2.39761	3.8125	5.3582	1.39953	0.853132	1.94522	3.0019	3.09125	1.85255
Smp_004020	Chr_1	5759723	5794365	34.642		4076	4485	5307	4454	648	625	317	406	326	941													Smp_004020	4.01435	4.54745	5.52724	4.70404	4.17739	3.80108	2.84037	3.22926	3.97006	3.89506
Smp_004040	Chr_1	5741940	5748732	6.792		140	217	398	465	144	166	67	98	65	193													Smp_004040	0.703257	1.1222	2.11421	2.50483	4.73475	5.1492	3.06193	3.97565	4.03737	4.07462
Smp_004060	Chr_1	5682100	5691939	9.839		3654	4331	3121	1830	32	30	107	157	81	37													Smp_004060	12.6707	15.4613	11.4447	6.80493	0.726326	0.642392	3.3756	4.39672	3.4731	0.539235
Smp_004070	Chr_1	5648129	5666146	18.017		82	61	81	31	4	12	1	1	0	21													Smp_004070	0.15528	0.11892	0.162205	0.062951	0.0495804	0.140323	0.017228	0.0152932	0	0.167134
Smp_004080	Chr_1	5621624	5640321	18.697		1388	1484	2282	1554	114	104	290	325	282	265													Smp_004080	2.5328	2.78785	4.40358	3.0409	1.36165	1.1719	4.81442	4.78952	6.36297	2.03236
Smp_004090	Chr_1	5584373	5603126	18.753		582	464	863	1610	171	163	64	86	89	240													Smp_004090	1.05885	0.869071	1.66036	3.14108	2.03638	1.83124	1.05932	1.2636	2.00218	1.83513
Smp_004120	Chr_2.unplaced.SC_0120	1016731	1045420	28.689		621	747	1393	981	199	257	45	76	58	368													Smp_004120	0.738516	0.914562	1.75185	1.25106	1.54907	1.88733	0.486872	0.729925	0.852895	1.83933
Smp_004160	Chr_2	18925582	18928559	2.977		151	116	139	206	39	40	0	2	0	53													Smp_004160	1.73054	1.36863	1.68461	2.5317	2.92562	2.83081	0	0.185111	0	2.55284
Smp_004170	Chr_2	18929324	18930142	0.818		878	697	1347	1405	116	149	84	113	109	230													Smp_004170	36.6205	29.9287	59.4123	62.8415	31.6692	38.3762	31.8746	38.0632	56.2155	40.3182
Smp_004190	Chr_2	18986179	19005986	19.807		3779	4237	4414	2582	375	490	223	218	140	505													Smp_004190	6.50941	7.51359	8.04037	4.76937	4.2281	5.21203	3.49465	3.03262	2.98189	3.65595
Smp_004200	Chr_2	19006227	19034276	28.049		1000	916	1623	1837	187	267	208	281	232	451													Smp_004200	1.21637	1.14706	2.08768	2.39616	1.48887	2.0055	2.30178	2.76038	3.48942	2.30561
Smp_004220	Chr_2	19055063	19058289	3.226		7857	8424	7193	5647	1254	1288	1405	1593	1057	1431													Smp_004220	83.0952	91.7196	80.4466	64.0438	86.8092	84.1165	135.185	136.06	138.227	63.6066
Smp_004230	Chr_1	50178847	50179164	0.317		4	7	12	2	1	1	2	2	0	0													Smp_004230	0.430511	0.775616	1.36579	0.230831	0.704488	0.664615	1.95834	1.73841	0	0
Smp_004260	Chr_2	19157653	19162216	4.563		823	789	1161	872	142	170	38	81	49	272													Smp_004260	6.15365	6.07344	9.18003	6.99181	6.94977	7.84925	2.58494	4.89119	4.53032	8.54763
Smp_004280	Chr_2	19215944	19216449	0.505		3613	2197	2183	2687	319	305	176	119	93	292													Smp_004280	244.096	152.808	155.964	194.67	141.069	127.244	108.178	64.9286	77.6917	82.9122
Smp_004310	SC_0037	736406	737446	1.04		17943	16931	16559	15626	1698	1936	1472	1561	814	2515													Smp_004310	588.634	571.817	574.464	549.716	364.617	392.195	439.332	413.571	330.198	346.762
Smp_004350	SC_0037	687013	691942	4.929		7539	5310	7326	7005	684	813	323	360	251	946													Smp_004350	52.1841	37.8394	53.6254	51.9964	30.9906	34.7505	20.3405	20.1244	21.4831	27.5207
Smp_004360	SC_0037	672681	676918	4.237		3495	3640	5658	4743	568	541	279	362	408	1320													Smp_004360	28.1431	30.1753	48.18	40.9561	29.938	26.901	20.4392	23.5413	40.6242	44.6727
Smp_004420	SC_0037	524325	528286	3.961		72	196	668	511	265	305	640	433	315	360													Smp_004420	0.620171	1.73804	6.08463	4.71998	14.9408	16.2228	50.1526	30.1206	33.5497	13.0324
Smp_004440	SC_0037	427674	447696	20.022		50	50	74	26	12	25	0	1	5	63													Smp_004440	0.0852013	0.0877143	0.133348	0.0475105	0.133846	0.263064	0	0.0137617	0.105353	0.451191
Smp_004470	SC_0037	335057	338462	3.405		6705	6546	7945	7518	925	871	713	746	451	1182													Smp_004470	67.1839	67.5254	84.1858	80.7809	60.6677	53.8928	64.9966	60.3673	55.8782	49.7769
Smp_004480	SC_0037	305375	316842	11.467		4842	5503	7378	7723	1315	1373	748	794	546	1997													Smp_004480	14.4065	16.8561	23.2141	24.6411	25.6099	25.2261	20.2474	19.0788	20.0875	24.9721
Smp_004510	Chr_5	7092639	7095173	2.534		24	10	15	67	5	6	0	1	5	6													Smp_004510	0.323138	0.138612	0.213573	0.967368	0.440652	0.498855	0	0.108736	0.832427	0.339525
Smp_004530	SC_0037	134968	135285	0.317		5	9	18	4	3	1	2	2	1	1													Smp_004530	0.538139	0.997221	2.04869	0.461662	2.11346	0.664615	1.95834	1.73841	1.33083	0.452343
Smp_004540	SC_0037	134440	134712	0.272		1	3	3	2	0	1	1	2	0	2													Smp_004540	0.125434	0.387401	0.397937	0.26902	0	0.77457	1.14117	2.02601	0	1.05436
Smp_004550	SC_0037	121981	129688	7.707		9458	6495	7960	9846	456	656	235	267	167	896													Smp_004550	41.8695	29.6007	37.264	46.741	13.2133	17.9328	9.46456	9.54566	9.14143	16.6705
Smp_004590	Chr_4	26991066	27003046	11.98		270	401	617	442	115	119	107	105	76	165													Smp_004590	0.768937	1.1757	1.85819	1.34986	2.14375	2.09276	2.77233	2.41498	2.67633	1.97494
Smp_004600	Chr_4	26914241	26919578	5.337		30405	33112	20749	14388	1912	1453	1539	2024	1222	2178													Smp_004600	194.371	217.92	140.269	98.6341	80.0061	57.3585	89.5075	104.495	96.5955	58.5178
Smp_004630	Chr_4	26811482	26819519	8.037		192	309	424	511	40	74	81	101	90	104													Smp_004630	0.815062	1.35043	1.90342	2.32622	1.11147	1.93985	3.12831	3.46264	4.72423	1.85552
Smp_004640	Chr_2	25576639	25587784	11.145		1937	2568	1617	1084	183	180	223	292	193	180													Smp_004640	5.92971	8.09325	5.2347	3.55855	3.66694	3.40269	6.21073	7.2191	7.30567	2.3159
Smp_004680	Chr_2	25703870	25707331	3.461		10189	9871	15854	13344	1859	2241	636	689	594	2828													Smp_004680	100.442	100.177	165.272	141.061	119.953	136.417	57.0392	54.8527	72.4049	117.167
Smp_004690	Chr_2	25730290	25741888	11.598		1028	654	1014	1665	143	178	33	34	22	201													Smp_004690	3.02408	1.98063	3.1544	5.25236	2.7535	3.23345	0.883179	0.807748	0.800244	2.48508
Smp_004710	Chr_2	25807276	25833461	26.185		764	635	822	508	88	151	22	20	13	252													Smp_004710	0.995461	0.851783	1.13261	0.709798	0.750521	1.21494	0.260788	0.210454	0.209447	1.37999
Smp_004730	Chr_2	25859434	25989280	129.846		23	44	74	56	26	45	2	3	4	59													Smp_004730	0.00604342	0.0119023	0.020562	0.0157791	0.0447175	0.0730152	0.00478101	0.00636609	0.0129961	0.0651554
Smp_004780	Chr_2	26134048	26135662	1.614		66566	59271	52374	47063	4117	2527	1625	2805	1340	4583													Smp_004780	1407.12	1289.87	1170.78	1066.84	569.652	329.861	312.513	478.861	350.255	407.168
Smp_004790	Chr_2	26142866	26150887	8.021		0	0	0	0	0	0	0	0	0	0													Smp_004790	0	0	0	0	0	0	0	0	0	0
Smp_004810	Chr_2	26259533	26270210	10.677		10231	11970	9555	8025	1405	1426	985	1239	812	1538													Smp_004810	32.6928	39.3779	32.2882	27.4992	29.3873	28.1384	28.6355	31.9744	32.0841	20.6554
Smp_004820	Chr_2	26279310	26279708	0.398		4452	3312	3214	3693	786	984	837	901	421	853													Smp_004820	381.642	292.291	291.357	339.484	441.034	520.885	652.771	623.766	446.254	307.322
Smp_004910	SC_0266	49004	56094	7.09		2879	3330	4922	4134	627	679	365	429	323	1187													Smp_004910	13.8541	16.497	25.0471	21.3328	19.7494	20.1768	15.9796	16.6721	19.2194	24.0067
Smp_004940	Chr_1	32513076	32513586	0.51		18236	12979	14919	16130	748	705	1561	1689	993	1257													Smp_004940	1219.95	893.88	1055.44	1157.15	327.54	291.238	950.06	912.514	821.414	353.421
Smp_004980	Chr_1	32465706	32466400	0.694		4791	3800	3722	3415	327	359	231	251	74	336													Smp_004980	235.532	192.323	193.499	180.034	105.225	108.984	103.317	99.6539	44.9837	69.4236
Smp_004990	Chr_1	32414350	32424976	10.626		43403	42930	27079	19821	2414	1326	2259	3055	1232	1823													Smp_004990	139.359	141.905	91.9443	68.2464	50.7341	26.2908	65.9879	79.2176	48.9129	24.6005
Smp_005000	Chr_1	32426944	32432316	5.372		2639	2526	2752	2478	422	487	264	286	250	726													Smp_005000	16.7605	16.516	18.4831	16.8768	17.5432	19.0995	15.2541	14.6693	19.633	19.3788
Smp_005010	Chr_ZW	43150487	43164216	13.729		3119	3318	3393	3403	335	307	302	342	215	482													Smp_005010	7.75104	8.48878	8.91676	9.06874	5.44927	4.71117	6.82788	6.86384	6.60667	5.03426
Smp_005020	Chr_ZW	43147408	43149783	2.375		3081	3531	5498	3566	486	515	176	239	183	905													Smp_005020	44.26	52.2206	83.5225	54.934	45.6988	45.6849	23.0021	27.7277	32.5065	54.6402
Smp_005050	SC_0223	304649	305559	0.91		409	368	618	861	118	175	54	81	56	304													Smp_005050	15.3344	14.2041	24.5024	34.6167	28.9583	40.516	18.4192	24.5258	25.9615	47.9026
Smp_005060	Chr_1	32550332	32552568	2.236		792	996	1388	815	255	263	380	515	118	173													Smp_005060	12.0847	15.6457	22.3965	13.3355	25.4684	24.7807	52.7509	63.4623	22.2635	11.0943
Smp_005070	Chr_1	32564625	32573510	8.885		642	543	914	790	200	241	72	112	82	364													Smp_005070	2.46525	2.1466	3.71151	3.25307	5.02696	5.71464	2.51532	3.47329	3.89349	5.8745
Smp_005080	Chr_1	32581854	32586948	5.094		2639	2562	2099	2551	200	201	302	292	191	257													Smp_005080	17.6752	17.6656	14.8667	18.3221	8.76806	8.31317	18.402	15.7944	15.8182	7.23438
Smp_005140	Chr_1	32692191	32693861	1.67		12	11	32	55	6	1	0	1	1	2													Smp_005140	0.245159	0.231358	0.691346	1.20495	0.802356	0.126157	0	0.164992	0.252619	0.171728
Smp_005160	Chr_1	32760045	32768706	8.661		2787	3378	3782	4115	950	1168	201	265	235	1422													Smp_005160	10.9787	13.6993	15.7549	17.383	24.4956	28.4122	7.20354	8.43059	11.4468	23.5428
Smp_005170	Chr_1	32770616	32770852	0.236		129	119	104	126	0	0	0	0	0	0													Smp_005170	18.6492	17.711	15.8995	19.5336	0	0	0	0	0	0
Smp_005180	Chr_1	32777648	32786073	8.425		12190	13124	11421	9381	789	785	897	1074	667	1204													Smp_005180	49.3648	54.7147	48.9099	40.7383	20.9141	19.6304	33.0477	35.1249	33.3994	20.492
Smp_005190	Chr_1	32806590	32848668	42.078		1986	2490	3980	3240	544	672	181	219	144	856													Smp_005190	1.6103	2.07851	3.41264	2.81717	2.8872	3.36468	1.33519	1.43407	1.44374	2.91706
Smp_005200	Chr_1	32849598	32871909	22.311		951	1682	1827	816	461	459	123	191	153	846													Smp_005200	1.45427	2.64798	2.95448	1.33812	4.61439	4.33434	1.71121	2.35882	2.89305	5.43724
Smp_005210	Chr_1	32874454	32880372	5.918		9462	11877	9717	7098	949	811	620	658	428	1231													Smp_005210	54.5496	70.492	59.2406	43.8818	35.8116	28.8719	32.5188	30.6359	30.5107	29.827
Smp_005230	Chr_1	32947914	32958667	10.753		6028	6617	11321	7559	1920	1943	549	694	490	2460													Smp_005230	19.1261	21.6142	37.9855	25.7193	39.8753	38.0691	15.8475	17.7832	19.2242	32.8044
Smp_005260	SC_0137	55040	61918	6.878		8483	11029	6593	4141	987	945	626	793	384	862													Smp_005260	42.0795	56.3225	34.5846	22.0276	32.047	28.9467	28.2508	31.7681	23.5533	17.971
Smp_005280	SC_0137	194822	211911	17.089		665	707	1087	1155	169	111	201	234	149	181													Smp_005280	1.32767	1.45315	2.29496	2.4728	2.20853	1.36847	3.65088	3.77294	3.67835	1.51876
Smp_005290	SC_0137	222797	238677	15.88		15569	12471	12698	11107	722	685	676	771	406	1043													Smp_005290	33.4498	27.5841	28.8501	25.59	10.1536	9.08803	13.2134	13.3778	10.786	9.41805
Smp_005320	SC_0137	313759	314211	0.452		1268	882	1324	1391	76	97	77	63	55	198													Smp_005320	95.7116	68.5391	105.685	112.593	37.5498	45.2129	52.8774	38.4045	51.3342	62.8136
Smp_005330	SC_0137	316501	344820	28.319		1435	1448	1977	2696	77	103	65	118	42	103													Smp_005330	1.72885	1.79597	2.51878	3.4831	0.607219	0.766282	0.712449	1.14811	0.625683	0.521539
Smp_005350	SC_0137	408268	420165	11.897		12877	10780	19179	12830	4951	5159	376	417	384	9889													Smp_005350	36.9284	31.8265	58.1635	39.456	92.9369	91.3603	9.80999	9.65781	13.6169	119.191
Smp_005360	SC_0151	77900	79012	1.112		57	208	329	247	101	160	23	6	4	151													Smp_005360	1.74885	6.57002	10.6746	8.12673	20.2838	30.3141	6.42009	1.48671	1.51753	19.4715
Smp_005390	SC_0151	187472	212313	24.841		1034	1382	1535	1621	186	229	202	180	155	297													Smp_005390	1.42015	1.9541	2.22947	2.38747	1.67215	1.94221	2.52406	1.99657	2.63236	1.71441
Smp_005470	SC_0151	431218	433799	2.581		7	1	2	3	140	224	15	18	12	119													Smp_005470	0.0925324	0.0136088	0.0279579	0.0425262	12.1136	18.2848	1.80394	1.92161	1.96145	6.61129
Smp_005500	SC_0049	385840	431654	45.814		525	805	669	297	219	229	322	319	137	244													Smp_005500	0.390971	0.617171	0.526854	0.237182	1.06753	1.05309	2.1816	1.91855	1.26155	0.763693
Smp_005520	SC_0049	470030	477396	7.366		1019	756	1410	1259	160	196	73	77	95	271													Smp_005520	4.71983	3.60494	6.90637	6.25342	4.85088	5.60601	3.07616	2.88031	5.44095	5.27551
Smp_005540	SC_0148	600682	601269	0.587		22	28	179	291	20	26	8	1	11	55													Smp_005540	1.2787	1.67544	11.0021	18.1375	7.60895	9.33179	4.23029	0.469399	7.90565	13.4354
Smp_005570	SC_0148	521678	540310	18.632		1419	1613	2029	1774	141	120	152	176	108	303													Smp_005570	2.5984	3.04077	3.92902	3.48352	1.69002	1.35691	2.53222	2.60276	2.44538	2.3319
Smp_005640	SC_0148	310069	321834	11.765		100	173	239	128	37	35	30	35	16	88													Smp_005640	0.289996	0.51649	0.73294	0.398054	0.702332	0.626766	0.791494	0.819703	0.573735	1.07255
Smp_005670	SC_0148	190660	197947	7.287		7647	5915	7017	8034	1092	1182	370	400	206	1248													Smp_005670	35.8035	28.5111	34.7428	40.3373	33.4662	34.1742	15.7605	15.1249	11.9262	24.558
Smp_005710	Chr_1	38875931	38890101	14.17		4	5	9	26	179	93	5	10	6	234													Smp_005710	0.00963105	0.0123939	0.0229158	0.0671316	2.82108	1.38275	0.109526	0.194451	0.178634	2.36795
Smp_005720	Chr_1	38791244	38799993	8.749		8387	9852	7854	3953	1286	1545	163	175	91	2763													Smp_005720	32.7063	39.5525	32.3888	16.5307	32.8258	37.2049	5.78292	5.51137	4.38799	45.2845
Smp_005740	Chr_1	38759469	38764399	4.93		11562	8613	8623	13153	2006	2240	112	173	121	3187													Smp_005740	80.0147	61.3643	63.1064	97.6116	90.8692	95.7262	7.05163	9.66895	10.3543	92.6963
Smp_005780	Chr_1	38655503	38660746	5.243		1119	1428	1270	1182	106	92	57	64	46	182													Smp_005780	7.28172	9.56657	8.73949	8.24824	4.51501	3.6969	3.37453	3.36341	3.70136	4.97758
Smp_005790	Chr_1	38629058	38645589	16.531		1023	1605	1662	674	219	200	135	146	79	322													Smp_005790	2.11135	3.41023	3.62739	1.49171	2.95854	2.54894	2.53485	2.43351	2.01609	2.79308
Smp_005860	Chr_1	38343494	38359065	15.571		74070	66569	39177	30651	6680	6292	3978	4365	2382	7070													Smp_005860	162.297	150.163	90.7772	72.0198	95.806	85.1337	79.2988	77.241	64.5369	65.1073
Smp_005880	Chr_1	38290494	38311038	20.544		4644	4718	3222	1531	821	318	158	134	90	829													Smp_005880	7.71242	8.06642	5.65852	2.72655	8.92464	3.26116	2.38721	1.79721	1.84816	5.78624
Smp_005900	Chr_1	38165217	38185996	20.779		4028	3335	5938	4834	1684	1461	414	537	298	1978													Smp_005900	6.61376	5.6374	10.3105	8.51149	18.0988	14.8134	6.18435	7.12082	6.05027	13.6499
Smp_005910	Chr_1	38142519	38156713	14.194		1066	1067	1531	1405	482	556	121	140	102	626													Smp_005910	2.56234	2.64039	3.89164	3.62156	7.58359	8.25277	2.64605	2.71771	3.03164	6.32407
Smp_005960	Chr_1	38041616	38057814	16.198		72	73	37	36	16	15	6	3	7	26													Smp_005960	0.151654	0.158296	0.0824143	0.0813139	0.220593	0.195101	0.114976	0.0510317	0.182314	0.230165
Smp_006000	Chr_1	37979244	37986260	7.016		4670	3935	3461	3263	246	273	315	313	205	330													Smp_006000	22.7097	19.6999	17.7981	17.0158	7.83029	8.1979	13.936	12.2924	12.3267	6.74453
Smp_006040	Chr_1	37885529	37901591	16.062		2635	1655	3518	4187	436	692	258	275	265	1032													Smp_006040	5.59712	3.61915	7.90239	9.53734	6.06205	9.07687	4.98584	4.71752	6.96032	9.21313
Smp_006060	Chr_1	37730255	37731679	1.424		6891	8378	8667	4754	1207	1544	441	541	410	2492													Smp_006060	165.103	206.651	219.594	122.144	189.291	228.437	96.1273	104.681	121.467	250.937
Smp_006190	Chr_ZW	12994687	13001869	7.182		1852	2553	1286	819	687	777	127	204	179	1335													Smp_006190	8.7979	12.4857	6.46038	4.17217	21.3621	22.7932	5.48879	7.82645	10.5145	26.654
Smp_006230	Chr_ZW	12587764	12593056	5.292		1107	1662	756	422	255	316	113	142	83	461													Smp_006230	7.13693	11.0311	5.15423	2.91754	10.761	12.5805	6.62791	7.39348	6.6167	12.4913
Smp_006240	Chr_ZW	12595611	12596262	0.651		281	435	221	142	84	66	28	28	25	72													Smp_006240	14.7268	23.4702	12.2482	7.98052	28.8158	21.3596	13.3504	11.8511	16.201	15.8591
Smp_006250	Chr_ZW	12606856	12619728	12.872		3864	5288	3012	2286	411	446	210	297	226	913													Smp_006250	10.2418	14.4296	8.4425	6.49761	7.13064	7.29992	5.06397	6.35756	7.40705	10.1707
Smp_006290	Chr_ZW	12728164	12733524	5.36		323	522	383	335	171	178	30	43	29	307													Smp_006290	2.05599	3.42069	2.57808	2.28667	7.12466	6.99656	1.7373	2.21047	2.28253	8.21298
Smp_006300	Chr_ZW	12746277	12749229	2.952		233	362	216	138	145	169	37	48	16	179													Smp_006300	2.69292	4.30725	2.63997	1.71036	10.9694	12.0615	3.89048	4.48028	2.28658	8.69488
Smp_006320	Chr_ZW	12764172	12775039	10.867		21772	22166	12941	6997	1804	1722	775	804	540	1669													Smp_006320	68.3553	71.645	42.9656	23.5573	37.0731	33.3851	22.1366	20.3857	20.9637	22.0229
Smp_006340	Chr_ZW	14159051	14167403	8.352		6781	5795	2602	2141	614	721	301	200	257	999													Smp_006340	27.7005	24.3709	11.2403	9.37886	16.4176	18.1876	11.1865	6.59811	12.9815	17.1515
Smp_006350	Chr_ZW	14167059	14185407	18.348		4121	5249	3685	3986	760	680	247	318	284	1409													Smp_006350	7.66298	10.0484	7.24621	7.94826	9.25033	7.80818	4.17856	4.7755	6.52999	11.0116
Smp_006390	SC_0138	259963	260505	0.542		13145	10381	12158	14811	3002	3361	1693	2090	624	2239													Smp_006390	827.456	672.741	809.329	999.79	1236.93	1306.47	969.562	1062.5	485.7	592.355
Smp_006440	SC_0138	361881	367047	5.166		6607	10016	7211	3680	668	664	637	748	591	970													Smp_006440	43.6349	68.1001	50.362	26.0626	28.8772	27.0797	38.2739	39.8958	48.2632	26.9243
Smp_006510	SC_0243	62314	63726	1.412		0	1	2	0	0	0	0	0	0	0													Smp_006510	0	0.0248756	0.0511043	0	0	0	0	0	0	0
Smp_006520	SC_0243	100303	102203	1.9		0	0	0	1	0	0	0	0	0	0													Smp_006520	0	0	0	0.0192562	0	0	0	0	0	0
Smp_006550	Chr_1	24680177	24690542	10.365		16462	11777	10765	13084	1084	1088	1023	1197	527	998													Smp_006550	54.1872	39.9092	37.472	46.1844	23.3557	22.1151	30.6355	31.8204	21.4498	13.8067
Smp_006560	Chr_1	24625907	24626853	0.946		2753	3170	3051	1891	344	278	253	374	207	359													Smp_006560	99.2884	117.7	116.363	73.1348	81.2082	61.9132	83.0133	108.933	92.3128	54.4165
Smp_006590	Chr_1	24473811	24484708	10.897		732	836	1348	1525	74	85	54	44	39	134													Smp_006590	2.29186	2.69468	4.46319	5.1202	1.51655	1.64339	1.53817	1.11257	1.50987	1.76329
Smp_006630	Chr_1	24386225	24402668	16.443		2802	3753	3308	2938	407	415	358	495	334	806													Smp_006630	5.81394	8.01688	7.2585	6.53724	5.52772	5.31737	6.75803	8.29477	8.56936	7.0288
Smp_006680	Chr_1	24201649	24205079	3.43		1079	1047	1753	2053	463	504	257	259	165	537													Smp_006680	10.7327	10.7216	18.4395	21.8987	30.1453	30.9575	23.2572	20.8059	20.2942	22.4495
Smp_006690	Chr_1	24172195	24183697	11.502		824	750	1152	1037	382	399	239	232	212	521													Smp_006690	2.4442	2.29032	3.61361	3.2986	7.4169	7.30851	6.44975	5.5577	7.77581	6.49518
Smp_006700	Chr_1	24140075	24171541	31.466		1867	2742	2511	1991	234	241	122	214	204	440													Smp_006700	2.02435	3.06079	2.87917	2.31501	1.66076	1.61363	1.20347	1.87393	2.73509	2.00511
Smp_006710	Chr_1	24122767	24126163	3.396		729	792	1090	1437	221	226	142	119	52	238													Smp_006710	7.32392	8.19154	11.5803	15.4815	14.5331	14.0207	12.9789	9.65516	6.45979	10.0493
Smp_006720	Chr_1	24097322	24122862	25.54		4428	2937	3147	3893	429	509	209	189	80	501													Smp_006720	5.91521	4.03916	4.44568	5.57683	3.75119	4.19881	2.54006	2.03902	1.32145	2.81283
Smp_006730	Chr_1	24058965	24075277	16.312		7038	5681	7628	11342	519	719	211	271	155	721													Smp_006730	14.7206	12.2328	16.872	25.4394	7.10547	9.28648	4.01507	4.57765	4.00874	6.33804
Smp_006740	Chr_1	24028902	24047037	18.135		14129	19539	18068	15173	5309	4991	1369	1586	1409	8140													Smp_006740	26.5814	37.8436	35.9463	30.611	65.3774	57.9828	23.4317	24.0972	32.7775	64.3627
Smp_006750	Chr_1.unplaced.SC_0295	5138	18473	13.335		908	967	1145	1306	223	289	47	78	65	430													Smp_006750	2.32315	2.54707	3.09795	3.58322	3.7346	4.56598	1.09401	1.61169	2.05638	4.62384
Smp_006760	Chr_1.unplaced.SC_0295	21192	44377	23.185		129	190	263	158	138	219	110	96	72	188													Smp_006760	0.189831	0.287842	0.409271	0.24933	1.32924	1.99006	1.47266	1.14089	1.31011	1.16273
Smp_006780	Chr_1	45183581	45184859	1.278		6284	5429	4637	4314	453	381	355	409	222	475													Smp_006780	167.76	149.21	130.909	123.502	79.1589	62.8093	86.2215	88.1805	73.2833	53.2954
Smp_006810	Chr_1	45294696	45303376	8.68		5670	6018	6139	4753	686	721	160	192	115	1055													Smp_006810	22.2868	24.3523	25.5176	20.0342	17.6497	17.5003	5.72161	6.09483	5.58935	17.4285
Smp_006830	Chr_1	45359357	45360492	1.135		4617	4262	4726	4742	633	624	437	422	322	1041													Smp_006830	138.787	131.894	150.231	152.858	124.549	115.829	119.51	102.446	119.686	131.517
Smp_006840	Chr_1	45375672	45383319	7.647		2414	2078	2242	2055	371	365	268	266	206	472													Smp_006840	10.7703	9.5447	10.5781	9.83206	10.8347	10.0561	10.8783	9.58453	11.3647	8.85071
Smp_006850	Chr_1	45385821	45386385	0.564		5260	3180	4875	6296	223	258	285	289	163	370													Smp_006850	318.193	198.041	311.859	408.422	88.2995	96.3763	156.85	141.188	121.925	94.0697
Smp_006860	Chr_1	45415708	45429833	14.125		4462	4411	5191	3373	2863	2878	215	285	214	4727													Smp_006860	10.7777	10.9687	13.2594	8.73678	45.2653	42.9271	4.72463	5.55951	6.39158	47.9871
Smp_006920	Chr_3.unplaced.SC_0192	304570	323249	18.679		1040	1426	1652	978	209	212	79	87	94	326													Smp_006920	1.89961	2.68148	3.19094	1.91562	2.49876	2.39118	1.31278	1.28335	2.12304	2.5026
Smp_006930	Chr_3.unplaced.SC_0192	214301	216026	1.725		2580	2646	2407	2284	444	463	135	149	100	775													Smp_006930	51.0287	53.8777	50.3442	48.443	57.4813	56.5485	24.292	23.8	24.4565	64.4228
Smp_006960	Chr_3.unplaced.SC_0192	156831	158104	1.273		0	0	2	1	5	1	2	0	0	0													Smp_006960	0	0	0.0566844	0.0287406	0.877151	0.165501	0.487663	0	0	0
Smp_006970	Chr_3.unplaced.SC_0192	119468	154747	35.279		1281	1605	1054	832	410	471	85	133	103	800													Smp_006970	1.23884	1.59796	1.07792	0.862841	2.59538	2.81277	0.747861	1.03876	1.2317	3.25163
Smp_006980	Chr_3.unplaced.SC_0192	119052	119399	0.347		3118	2485	1919	2015	172	275	68	73	47	432													Smp_006980	306.57	251.539	199.53	212.456	110.696	166.968	60.8272	57.966	57.1415	178.518
Smp_006990	Chr_2	865	11186	10.321		3340	4369	3704	1622	590	437	549	803	496	1030													Smp_006990	11.041	14.8685	12.9483	5.7498	12.7662	8.9205	16.5108	21.4375	20.2742	14.3101
Smp_007000	Chr_2	36765	40311	3.546		702	554	619	672	1	6	29	28	20	21													Smp_007000	6.75433	5.48756	6.29817	6.93353	0.0629787	0.356486	2.5385	2.1757	2.37944	0.849195
Smp_007070	Chr_1	30578258	30579265	1.007		97	129	279	201	21	20	5	4	1	40													Smp_007070	3.28644	4.49954	9.99625	7.30281	4.65717	4.18437	1.5412	1.09449	0.418942	5.69584
Smp_007170	Chr_1	30218404	30237683	19.279		3259	3604	4227	3953	456	529	274	374	318	1044													Smp_007170	5.76744	6.56611	7.91061	7.50181	5.28218	5.78097	4.41148	5.34524	6.95866	7.76503
Smp_007180	Chr_1	30184280	30203458	19.178		4080	6138	4826	3070	587	548	378	489	336	880													Smp_007180	7.25839	11.2417	9.07917	5.85678	6.83545	6.02014	6.11796	7.02564	7.39127	6.57971
Smp_007190	Chr_1	30171516	30180223	8.707		1869	2014	2342	2089	254	254	151	204	206	444													Smp_007190	7.3236	8.12454	9.70467	8.77796	6.51475	6.14603	5.38303	6.45568	9.98117	7.31209
Smp_007210	Chr_1	30097688	30129242	31.554		379	700	985	429	204	285	47	66	39	470													Smp_007210	0.409797	0.779205	1.12627	0.497424	1.4438	1.90292	0.46234	0.576328	0.521427	2.13585
Smp_007260	Chr_1	29994154	30007931	13.777		28404	39424	35658	22037	4185	4377	2501	2959	1602	5130													Smp_007260	70.341	100.511	93.3823	58.5223	67.8381	66.9347	56.3478	59.1794	49.0558	53.3937
Smp_007270	Chr_1	29956856	29978798	21.942		1830	1705	1670	1234	973	1177	126	119	97	1632													Smp_007270	2.8455	2.72933	2.74601	2.05761	9.90306	11.3013	1.78243	1.49435	1.865	10.6652
Smp_007290	Chr_1	29919198	29933043	13.845		448	347	502	512	32	57	9	18	6	90													Smp_007290	1.104	0.880328	1.3082	1.35301	0.516166	0.867384	0.201775	0.358228	0.182827	0.93213
Smp_007300	Chr_1	29907574	29908217	0.643		40983	31536	22947	21007	2376	2187	1601	1726	1073	2863													Smp_007300	2174.58	1722.68	1287.59	1195.3	825.217	716.584	772.856	739.622	703.998	638.466
Smp_007330	Chr_1	29834741	29856242	21.501		359	552	1170	808	188	183	72	64	46	239													Smp_007330	0.569665	0.901755	1.96331	1.37492	1.95268	1.79317	1.03942	0.820166	0.902573	1.59392
Smp_007380	Chr_1	29755071	29761214	6.143		4273	3662	5398	5270	595	692	368	379	358	972													Smp_007380	23.7321	20.9385	31.704	31.3873	21.6306	23.7331	18.5945	16.9996	24.5859	22.6889
Smp_007450	Chr_ZW	7820329	7821497	1.168		1501	1119	1025	991	559	449	101	87	74	554													Smp_007450	43.8451	33.6508	31.6624	31.0423	106.881	80.9903	26.8409	20.5237	26.7283	68.0133
Smp_007500	Chr_3	14401734	14403327	1.593		5304	4679	5492	5404	1010	1029	513	614	456	1392													Smp_007500	113.598	103.168	124.388	124.115	141.592	136.091	99.9585	106.202	120.762	125.3
Smp_007510	Chr_3	14373468	14376963	3.495		1650	2167	2013	2187	529	523	384	367	334	711													Smp_007510	16.1072	21.7781	20.7806	22.8942	33.8019	31.5271	34.1038	28.9334	40.3164	29.1709
Smp_007540	SC_0170	270903	272804	1.901		3243	2824	2184	1606	160	136	158	206	134	167													Smp_007540	58.2034	52.1784	41.4508	30.9092	18.7962	15.0725	25.7984	29.8583	29.7376	12.5968
Smp_007550	SC_0170	247034	263497	16.463		3929	5770	5667	3594	501	584	279	439	360	819													Smp_007550	8.14248	12.3105	12.4196	7.98717	6.79612	7.47366	5.26033	7.34744	9.22521	7.13349
Smp_007570	SC_0170	223426	224547	1.121		10	12	25	13	1	7	9	17	11	2													Smp_007570	0.304353	0.375996	0.804631	0.424289	0.199217	1.31559	2.49204	4.17853	4.13971	0.25583
Smp_007630	Chr_ZW	8666816	8669421	2.605		13097	11536	5202	4080	1345	1266	464	521	297	1505													Smp_007630	171.533	155.545	72.0485	57.3028	115.305	102.39	55.2877	55.1074	48.0985	82.843
Smp_007640	Chr_ZW	8622662	8661609	38.947		5021	6904	4736	3373	1458	1575	371	401	302	2472													Smp_007640	4.39845	6.22637	4.38733	3.16859	8.36019	8.51993	2.95677	2.83694	3.27127	9.10126
Smp_007650	Chr_ZW	8613521	8622083	8.562		947	2016	756	283	878	1011	229	226	132	1103													Smp_007650	3.77362	8.27034	3.18573	1.2093	22.9009	24.8774	8.30192	7.273	6.50402	18.4726
Smp_007660	Chr_ZW	8584617	8597151	12.534		2197	2513	2318	2122	614	581	392	388	277	757													Smp_007660	5.98031	7.04224	6.67246	6.19412	10.9398	9.76598	9.70766	8.52947	9.32337	8.66031
Smp_007670	Chr_ZW	8568689	8572226	3.537		49	75	48	32	24	49	343	373	418	64													Smp_007670	0.472655	0.744791	0.48963	0.331008	1.51534	2.91871	30.1007	29.0572	49.8568	2.59461
Smp_007690	Chr_ZW	8527593	8549710	22.117		94	170	175	40	7	7	0	3	0	6													Smp_007690	0.145006	0.269979	0.285479	0.0661694	0.0706813	0.0666809	0	0.0373745	0	0.0389002
Smp_007700	Chr_ZW	8489280	8522558	33.278		295	363	568	575	271	300	41	98	46	382													Smp_007700	0.302446	0.38314	0.615819	0.632171	1.81863	1.8993	0.382424	0.811426	0.583154	1.64601
Smp_007710	Chr_ZW	8457061	8481458	24.397		18	64	36	38	51	31	15	4	8	46													Smp_007710	0.0251721	0.0921407	0.0532388	0.0569864	0.466838	0.267704	0.190842	0.0451756	0.138336	0.270364
Smp_007730	Chr_ZW	8430174	8442313	12.139		4500	5072	2322	2692	853	972	324	375	168	872													Smp_007730	12.6477	14.6759	6.90147	8.11364	15.6927	16.8699	8.28477	8.51194	5.83861	10.3006
Smp_007760	Chr_ZW	8258239	8270486	12.247		300	506	390	204	1054	1240	159	213	153	1479													Smp_007760	0.835748	1.45121	1.14894	0.60943	19.2196	21.3315	4.02982	4.79215	5.27041	17.3167
Smp_007770	Chr_ZW	8197083	8216917	19.834		487	609	620	505	120	90	78	52	52	173													Smp_007770	0.837727	1.07849	1.12783	0.931547	1.35115	0.956008	1.22068	0.722393	1.10605	1.25073
Smp_007780	Chr_ZW	8176067	8191547	15.48		220	361	245	102	91	91	44	56	20	99													Smp_007780	0.484881	0.819114	0.571028	0.241075	1.31281	1.23851	0.882267	0.996775	0.545057	0.917046
Smp_007890	Chr_1	63638052	63640840	2.788		1878	1733	2097	2105	227	204	164	181	61	289													Smp_007890	22.9819	21.833	27.1374	27.6238	18.183	15.4158	18.2587	17.8882	9.23039	14.8639
Smp_007900	Chr_1	63634011	63636014	2.003		43377	27591	27279	31643	2359	1785	3241	3619	1390	1495													Smp_007900	738.86	483.832	491.371	577.99	263.014	187.753	502.246	497.838	292.763	107.026
Smp_007950	Chr_4	16063962	16064504	0.542		17	12	11	9	9	1	9	19	1	10													Smp_007950	1.07012	0.77766	0.732244	0.607529	3.70831	0.388714	5.1542	9.65905	0.778366	2.64562
Smp_007960	Chr_4	16039135	16051526	12.391		992	980	1805	1970	257	278	404	519	179	331													Smp_007960	2.73142	2.77797	5.25573	5.81679	4.6319	4.72681	10.1203	11.5409	6.09438	3.83044
Smp_007970	Chr_4	16030526	16033538	3.012		1154	1277	1366	1628	210	209	189	210	206	335													Smp_007970	13.0718	14.8917	16.3628	19.7753	15.5703	14.6191	19.4771	19.2108	28.8533	15.9484
Smp_008070	Chr_7	8315123	8315971	0.848		59667	33072	29501	36982	4434	5614	3172	3420	1016	2949													Smp_008070	2400.61	1369.85	1255.17	1595.58	1167.7	1394.78	1161.06	1111.25	505.453	498.662
Smp_008120	Chr_1	41176829	41190143	13.314		2456	2706	2957	2512	212	220	133	185	184	419													Smp_008120	6.29366	7.13883	8.01318	6.90295	3.55598	3.48132	3.10071	3.82863	5.83032	4.51266
Smp_008140	Chr_1	41104892	41110551	5.659		982	665	1481	1706	63	111	39	78	50	159													Smp_008140	5.92046	4.12753	9.4423	11.0297	2.48619	4.1325	2.13916	3.79783	3.72746	4.02888
Smp_008170	Chr_1	41031791	41052286	20.495		0	0	2	5	0	0	0	0	0	0													Smp_008170	0	0	0.00352082	0.00892577	0	0	0	0	0	0
Smp_008190	Chr_1	40923822	40947962	24.14		7	7	8	10	25	15	1	4	0	8													Smp_008190	0.00989337	0.0101852	0.0119568	0.0151561	0.231279	0.130913	0.0128582	0.0456565	0	0.0475204
Smp_008220	Chr_1	40796108	40819240	23.132		362	464	980	1178	41	46	49	73	59	69													Smp_008220	0.533923	0.704552	1.52853	1.86318	0.395825	0.418962	0.657508	0.869541	1.07602	0.427723
Smp_008230	Chr_1	40773780	40782101	8.321		1511	1293	2039	2319	490	553	169	183	158	680													Smp_008230	6.19545	5.45797	8.84105	10.1964	13.1508	14.0016	6.30419	6.05977	8.01059	11.7182
Smp_008260	Chr_1	40711404	40733798	22.394		1355	2283	2666	1676	523	671	235	256	228	783													Smp_008260	2.06439	3.58082	4.29527	2.73821	5.21558	6.31278	3.25727	3.14984	4.29523	5.01369
Smp_008290	Chr_1	40596322	40653653	57.331		407	583	1152	1258	286	361	191	255	85	383													Smp_008290	0.242208	0.35718	0.724979	0.802814	1.11406	1.32662	1.0341	1.22555	0.625478	0.957936
Smp_008310	Chr_1	40550909	40557026	6.117		9668	9210	8088	7249	1149	1079	844	992	663	1735													Smp_008310	53.924	52.8846	47.7051	43.3574	41.9483	37.1631	42.8274	44.6841	45.7255	40.6713
Smp_008320	Chr_1	40517842	40526934	9.092		6592	7268	7898	9048	1557	1719	1196	1231	449	1734													Smp_008320	24.7367	28.0778	31.3415	36.4097	38.2439	39.8333	40.831	37.306	20.8339	27.3474
Smp_008340	Chr_1	40480624	40513864	33.24		680	633	916	1909	113	150	84	83	54	217													Smp_008340	0.697962	0.668884	0.994252	2.10121	0.759189	0.950736	0.784398	0.688014	0.685355	0.936108
Smp_008360	Chr_1	40469791	40470887	1.096		4310	4097	4864	3719	491	693	492	505	250	680													Smp_008360	134.168	131.3	160.12	124.148	100.047	133.215	139.339	126.958	96.2304	88.9663
Smp_008370	Chr_1	40469179	40469723	0.544		11	29	43	12	6	3	1	2	1	6													Smp_008370	0.689886	1.87244	2.85188	0.80706	2.46312	1.16185	0.570584	1.013	0.775504	1.58154
Smp_008390	Chr_1	40454269	40454875	0.606		2	0	5	7	1	0	0	1	0	0													Smp_008390	0.112601	0	0.297687	0.422619	0.368519	0	0	0.454682	0	0
Smp_008400	Chr_1	40422851	40424026	1.175		460	455	554	412	11	16	12	5	10	24													Smp_008400	13.3568	13.6013	17.0112	12.8287	2.09068	2.86888	3.17002	1.1725	3.59042	2.92887
Smp_008430	Chr_1	31239572	31248257	8.685		6841	5158	7461	7623	686	826	476	522	380	950													Smp_008430	26.8741	20.8602	30.9948	32.1129	17.6395	20.0373	17.012	16.5608	18.4585	15.6849
Smp_008440	Chr_1	31247968	31251550	3.582		5336	3069	3518	3658	182	195	167	184	109	302													Smp_008440	50.8246	30.094	35.435	37.363	11.3469	11.4693	14.4713	14.1538	12.8376	12.0895
Smp_008450	Chr_1	31263266	31269014	5.748		17	51	92	39	6	4	5	13	9	2													Smp_008450	0.100906	0.311646	0.577475	0.24824	0.233113	0.146613	0.270005	0.62317	0.660555	0.0498931
Smp_008470	Chr_1	31218455	31233152	14.697		2355	2654	3271	2972	623	691	248	225	291	956													Smp_008470	5.46696	6.34279	8.02997	7.3985	9.46655	9.90556	5.23771	4.21827	8.35309	9.32731
Smp_008490	Chr_1	31164850	31173719	8.869		6288	7252	5634	3685	1256	1259	169	221	157	1988													Smp_008490	24.1892	28.7204	22.9195	15.2015	31.6262	29.9075	5.91467	6.86591	7.46806	32.1417
Smp_008500	Chr_1	31102488	31115730	13.242		3697	4496	5481	3607	840	773	529	642	411	1066													Smp_008500	9.52532	11.9256	14.9337	9.96589	14.1664	12.2986	12.4	13.3586	13.094	11.5433
Smp_008545	Chr_4.unplaced.SC_0032	188514	191484	2.97		95810	119716	56970	32896	7053	3833	5654	8271	3171	5492													Smp_008545	1100.62	1415.81	692.073	405.238	530.335	271.902	590.905	767.329	450.425	265.156
Smp_008580	Chr_4.unplaced.SC_0032	133374	138477	5.103		3723	3837	3638	3720	312	314	300	415	256	571													Smp_008580	24.8915	26.4104	25.7217	26.6711	13.6541	12.9638	18.2479	22.408	21.164	16.0449
Smp_008610	Chr_4.unplaced.SC_0032	43204	58419	15.215		524	1710	1708	1357	1531	2143	1178	1302	887	1647													Smp_008610	1.17501	3.94759	4.05022	3.26311	22.4717	29.6742	24.0321	23.5787	24.5943	15.522
Smp_008620	Chr_4.unplaced.SC_0032	14021	36379	22.358		240	370	628	625	98	117	20	8	15	188													Smp_008620	0.366237	0.581268	1.01342	1.02275	0.978872	1.10251	0.277661	0.098591	0.283036	1.20574
Smp_008640	SC_0211	149145	149237	0.092		0	0	0	0	0	0	0	0	0	0													Smp_008640	0	0	0	0	0	0	0	0	0	0
Smp_008660	Chr_4	9076274	9108810	32.536		14736	11940	19941	16453	5972	6467	770	1023	425	8650													Smp_008660	15.4525	12.8899	22.1129	18.5014	40.991	41.8763	7.34589	8.66347	5.51071	38.1223
Smp_008710	Chr_4	8738714	8744231	5.517		242	380	1274	648	182	247	11	26	6	356													Smp_008710	1.49657	2.41929	8.3316	4.2973	7.36718	9.43243	0.618882	1.29853	0.458808	9.25282
Smp_008770	Chr_4	8680946	8684379	3.433		3726	3361	4032	3833	322	288	240	256	168	475													Smp_008770	37.0299	34.3877	42.3749	40.8497	20.9467	17.6745	21.6998	20.5469	20.6452	19.8402
Smp_008830	Chr_4	8590160	8603154	12.994		8221	12054	8675	5234	857	837	513	574	349	1355													Smp_008830	21.5857	32.5834	24.0873	14.7372	14.7289	13.571	12.2544	12.1716	11.3309	14.9528
Smp_008850	Chr_4	7330758	7332305	1.547		74	84	251	141	23	19	9	4	19	27													Smp_008850	1.63202	1.9072	5.8539	3.33467	3.32024	2.58757	1.8058	0.712443	5.18139	2.50265
Smp_008860	Chr_4	7471977	7477643	5.666		898	663	981	1117	87	85	10	14	9	200													Smp_008860	5.40734	4.11003	6.24676	7.21274	3.42906	3.16062	0.547825	0.680819	0.670114	5.06151
Smp_008900	Chr_4	7630941	7648145	17.204		16115	24521	21095	18041	3307	3418	1635	2072	1326	5061													Smp_008900	31.9584	50.063	44.2397	38.3667	42.9277	41.8574	29.4989	33.1849	32.516	42.1827
Smp_008910	Chr_5	5859447	5861636	2.189		22	8	27	14	1	2	0	0	2	2													Smp_008910	0.342895	0.128367	0.445021	0.233995	0.10202	0.192492	0	0	0.385449	0.131012
Smp_008920	Chr_4	7668393	7689848	21.455		18	25	61	34	10	12	0	1	0	21													Smp_008920	0.0286238	0.0409279	0.10258	0.0579795	0.104089	0.117837	0	0.0128426	0	0.140352
Smp_009020	Chr_4	8012011	8015730	3.719		247	207	237	194	7	9	1	0	2	38													Smp_009020	2.26597	1.95502	2.29924	1.90853	0.420344	0.509854	0.0834626	0	0.226875	1.46516
Smp_009030	Chr_4	8062178	8069763	7.585		9387	12867	10263	5710	403	352	759	900	675	501													Smp_009030	42.2236	59.584	48.8181	27.5426	11.8654	9.77725	31.0602	32.6939	37.5432	9.47129
Smp_009040	Chr_4	8093119	8095206	2.087		246	136	388	255	30	24	1	1	7	50													Smp_009040	4.02158	2.28889	6.70767	4.47035	3.21019	2.4228	0.148729	0.132025	1.41501	3.43538
Smp_009070	Chr_4	8149482	8155802	6.32		1988	2260	2486	1639	637	696	134	186	204	1059													Smp_009070	10.7321	12.5603	14.1921	9.48824	22.5089	23.2018	6.58121	8.10916	13.6175	24.0274
Smp_009150	Chr_4	8337452	8350686	13.234		3053	2567	3131	3944	245	170	145	190	99	249													Smp_009150	7.87081	6.81307	8.53599	10.9036	4.13435	2.70637	3.40091	3.95588	3.15593	2.69796
Smp_009230	Chr_6	18567332	18567744	0.412		335	352	21	15	866	803	28	33	12	607													Smp_009230	27.7416	30.0091	1.83901	1.33204	469.411	410.627	21.095	22.0697	12.2876	211.261
Smp_009250	Chr_6	18463786	18475228	11.442		2945	3305	4400	3607	719	889	317	359	376	1346													Smp_009250	8.78146	10.1456	13.8744	11.5337	14.0333	16.3693	8.59954	8.64515	13.8634	16.8683
Smp_009300	Chr_6	18218145	18235260	17.115		605	593	1110	901	126	177	56	41	77	261													Smp_009300	1.20604	1.21699	2.33996	1.92607	1.64409	2.17884	1.01562	0.660066	1.898	2.18671
Smp_009310	Chr_6	18183886	18185722	1.836		120489	99167	93257	83270	15416	11146	8463	9951	4301	11368													Smp_009310	2239.02	1897.15	1832.61	1659.36	1875.13	1279.02	1430.77	1493.39	988.279	887.848
Smp_009320	Chr_6	18147547	18152225	4.678		2601	2105	1979	1715	662	596	397	314	197	728													Smp_009320	18.9698	15.8052	15.2633	13.4131	31.6031	26.842	26.342	18.4948	17.766	22.3151
Smp_009340	Chr_6	18093796	18098764	4.968		886	930	851	716	95	98	55	57	61	140													Smp_009340	6.08465	6.57521	6.18031	5.27297	4.27046	4.15599	3.43636	3.16136	5.18002	4.04086
Smp_009390	Chr_6	17955470	17956002	0.532		2440	1493	2477	3261	173	202	112	139	95	286													Smp_009390	156.481	98.5726	167.987	224.266	72.6218	79.9962	65.3468	71.9919	75.3347	77.0871
Smp_009400	Chr_6	17926232	17946786	20.554		5502	7384	5208	3956	639	671	449	608	400	839													Smp_009400	9.13288	12.6184	9.14191	7.0418	6.94284	6.8779	6.7806	8.15056	8.21006	5.85319
Smp_009420	Chr_6	17866397	17894128	27.731		864	992	1143	1321	134	146	139	144	59	147													Smp_009420	1.063	1.25648	1.48711	1.74285	1.07913	1.10922	1.55585	1.43079	0.897572	0.760114
Smp_009430	SC_0442	19087	25228	6.141		2575	2092	2794	2415	324	340	276	384	248	421													Smp_009430	14.3061	11.9655	16.4153	14.388	11.7825	11.6646	13.9504	17.2295	17.0371	9.83037
Smp_009520	Chr_1	54091250	54108660	17.41		1425	1357	2018	2565	124	136	124	137	94	215													Smp_009520	2.79254	2.73772	4.18201	5.39029	1.59058	1.64577	2.21076	2.16821	2.27778	1.77079
Smp_009530	Chr_1	54109722	54114146	4.424		1411	1010	1696	1863	93	81	83	50	40	104													Smp_009530	10.8817	8.01889	13.8316	15.4071	4.69462	3.85744	5.82346	3.11412	3.81441	3.3709
Smp_009540	Chr_1	54132947	54160066	27.119		805	1344	2552	2157	489	483	161	140	99	584													Smp_009540	1.01276	1.74074	3.39523	2.91005	4.02687	3.75235	1.84277	1.42244	1.54008	3.08792
Smp_009550	Chr_1	54218153	54242461	24.308		343	410	1160	1342	238	223	75	84	63	349													Smp_009550	0.481425	0.592438	1.72175	2.01989	2.18655	1.93279	0.957702	0.952161	1.09339	2.05875
Smp_009560	Chr_1	54244465	54249987	5.522		447	338	788	1441	100	152	37	65	32	167													Smp_009560	2.76182	2.14995	5.14863	9.54754	4.04423	5.79932	2.07981	3.24338	2.44476	4.33658
Smp_009580	Chr_1	54270523	54271304	0.781		150580	124010	135814	129431	53913	41315	15364	16217	5342	29451													Smp_009580	6578.09	5577.17	6274.16	6063.33	15416.1	11145.2	6106.21	5721.37	2885.6	5407.25
Smp_009600	Chr_1	32309427	32321362	11.935		3148	4173	3971	2343	96	85	185	232	202	78													Smp_009600	8.99903	12.281	12.0044	7.18247	1.79631	1.50047	4.81136	5.35606	7.14022	0.937129
Smp_009630	SC_0125	917510	929105	11.595		30	46	96	91	8	4	0	1	0	26													Smp_009630	0.0882743	0.139346	0.298719	0.28714	0.154082	0.0726806	0	0.0237634	0	0.321536
Smp_009650	SC_0125	860820	866149	5.329		22918	25296	15504	11905	1326	1292	1249	1256	838	2123													Smp_009650	146.729	166.73	104.969	81.7349	55.5687	51.0795	72.7503	64.9418	66.3409	57.1257
Smp_009690	SC_0187	76180	77562	1.382		85529	71296	41333	31227	4389	3650	3418	4483	2196	4972													Smp_009690	2111.49	1812.03	1079.07	826.696	709.235	556.435	767.683	893.801	670.359	515.882
Smp_009710	SC_0187	137555	167271	29.716		2032	2674	1779	1363	691	772	144	135	115	984													Smp_009710	2.33301	3.16067	2.15997	1.67814	5.19302	5.47339	1.50415	1.25177	1.63264	4.74823
Smp_009760	Chr_1.unplaced.SC_0010	3686497	3687425	0.928		135034	111235	80969	70688	9320	8896	5032	5712	3703	11642													Smp_009760	4964.54	4210.19	3147.99	2786.9	2242.85	2019.65	1683.1	1695.98	1683.41	1798.9
Smp_009780	Chr_1.unplaced.SC_0010	3646609	3655016	8.407		66335	60393	40402	37414	6207	5496	2852	2946	1700	5259													Smp_009780	269.206	252.321	173.39	162.823	164.882	137.732	105.3	96.5544	85.3082	89.6993
Smp_009800	Chr_1.unplaced.SC_0010	3566055	3589001	22.946		16	47	100	78	21	24	5	8	1	24													Smp_009800	0.0237901	0.0719447	0.157237	0.124369	0.204383	0.220361	0.0676365	0.0960646	0.0183855	0.149979
Smp_009810	Chr_1.unplaced.SC_0010	3528184	3536631	8.447		12	1	21	27	0	1	0	1	0	4													Smp_009810	0.0484688	0.0041582	0.0896972	0.116946	0	0.0249418	0	0.0326195	0	0.0679023
Smp_009830	Chr_1.unplaced.SC_0010	3485447	3491426	5.979		5801	5099	4221	3881	419	370	684	912	480	496													Smp_009830	33.1023	29.9547	25.4712	23.7486	15.6501	13.0378	35.5096	42.0288	33.8685	11.8954
Smp_009990	Chr_3	12468495	12502139	33.644		1735	1902	2609	3101	298	383	91	145	87	596													Smp_009990	1.75944	1.98569	2.79788	3.37224	1.97807	2.39839	0.83956	1.18752	1.09092	2.54019
Smp_010000	Chr_3	12453500	12453980	0.48		1	4	14	10	1	2	0	1	1	1													Smp_010000	0.0710792	0.292703	1.05232	0.762224	0.465255	0.877846	0	0.574036	0.878905	0.298735
Smp_010090	Chr_3	12107755	12115830	8.075		5074	4542	4466	4066	951	936	589	764	313	1068													Smp_010090	21.4384	19.7566	19.9544	18.4225	26.3009	24.421	22.6408	26.0694	16.3525	18.9651
Smp_010100	Chr_3	12066221	12087443	21.222		1421	1213	1789	1918	471	475	232	272	156	562													Smp_010100	2.2845	2.00762	3.04149	3.30663	4.95641	4.7156	3.39328	3.53153	3.10114	3.79732
Smp_010110	Chr_3	12048477	12063338	14.861		3137	3005	2862	3509	268	230	154	196	113	405													Smp_010110	7.20195	7.10239	6.94838	8.63891	4.02735	3.26069	3.21655	3.63403	3.20784	3.90782
Smp_010140	Chr_3	12005432	12008066	2.634		2298	2156	3232	3639	353	394	239	287	236	644													Smp_010140	29.7658	28.7502	44.2708	50.5464	29.929	31.5145	28.1644	30.0225	37.7989	35.0588
Smp_010160	Chr_3	11955485	11963827	8.342		8681	6735	8313	9279	514	529	318	426	178	628													Smp_010160	35.5045	28.358	35.9542	40.6963	13.7602	13.3603	11.8325	14.0708	9.00187	10.7948
Smp_010230	Chr_1.unplaced.SC_0010	2921927	2936355	14.428		1652	2374	2264	1123	221	194	46	40	36	306													Smp_010230	3.9065	5.7794	5.66151	2.84772	3.42073	2.83286	0.989623	0.763896	1.05264	3.04118
Smp_010250	Chr_1.unplaced.SC_0010	2979089	3000964	21.875		1949	3142	3299	1662	608	662	255	277	169	694													Smp_010250	3.03982	5.04506	5.44122	2.77976	6.20709	6.37587	3.61835	3.48909	3.25928	4.54924
Smp_010260	Chr_1.unplaced.SC_0010	3011459	3019787	8.328		1542	1419	2001	2056	188	184	104	126	96	385													Smp_010260	6.31724	5.9848	8.66899	9.03246	5.04138	4.65486	3.87624	4.16879	4.8631	6.62899
Smp_010280	Chr_1.unplaced.SC_0010	3057546	3085793	28.247		2862	2354	3237	2678	175	232	167	171	83	238													Smp_010280	3.45685	2.92713	4.13459	3.46866	1.38356	1.73039	1.83511	1.66803	1.23962	1.20818
Smp_010290	SC_0201	95493	108840	13.347		7169	11282	6176	2850	1246	1232	888	1040	1047	1916													Smp_010290	18.3256	29.69	16.695	7.81241	20.8481	19.4472	20.6513	21.4699	33.0937	20.5844
Smp_010370	Chr_7	895590	897944	2.354		1399	1333	1555	1572	377	696	262	277	140	713													Smp_010370	20.2766	19.8899	23.8334	24.4326	35.7658	62.292	34.5472	32.423	25.0902	43.432
Smp_010380	Chr_7	906614	913160	6.546		128	76	201	285	1	2	3	6	7	10													Smp_010380	0.667141	0.407798	1.10785	1.59291	0.0341159	0.06437	0.142254	0.252555	0.451133	0.219054
Smp_010400	Chr_7	986172	987953	1.781		3919	2938	2603	2311	121	113	90	114	66	182													Smp_010400	75.0749	57.9423	52.7318	47.4744	15.1724	13.3673	15.6854	17.6369	15.6337	14.6533
Smp_010450	Chr_7	1138996	1144826	5.83		49	45	54	45	25	25	0	2	1	68													Smp_010450	0.286755	0.271114	0.334185	0.282402	0.957644	0.903443	0	0.0945239	0.0723626	1.67251
Smp_010470	Chr_7	1216218	1218848	2.63		0	0	0	0	0	0	0	0	0	0													Smp_010470	0	0	0	0	0	0	0	0	0	0
Smp_010550	Chr_7	1704808	1721556	16.748		22870	16288	11439	8112	2219	3228	18	32	61	7496													Smp_010550	46.5894	34.1596	24.6426	17.721	29.5888	40.6069	0.333601	0.526462	1.53656	64.1791
Smp_010620	Chr_7	2131536	2140578	9.042		1243	1264	1127	1569	192	188	161	109	69	232													Smp_010620	4.69019	4.9101	4.49699	6.34866	4.74208	4.38049	5.52687	3.32156	3.21935	3.67918
Smp_010660	Chr_7	2261928	2262370	0.442		73	48	109	82	52	79	20	23	11	238													Smp_010660	5.63487	3.81441	8.89747	6.78759	26.2732	37.656	14.0451	14.3379	10.4991	77.2115
Smp_010670	Chr_7	2269794	2316326	46.532		259	271	482	155	521	507	133	175	199	1353													Smp_010670	0.189903	0.204562	0.37373	0.121872	2.50045	2.29554	0.887193	1.03625	1.8042	4.1694
Smp_010690	Chr_7	2435656	2446454	10.798		1514	1649	1670	1368	369	428	153	197	135	512													Smp_010690	4.78372	5.36396	5.58001	4.63518	7.6316	8.35084	4.39811	5.02693	5.2744	6.79914
Smp_010710	Chr_7	2490147	2510553	20.406		8278	8785	7259	5407	1127	1009	644	764	379	1266													Smp_010710	13.8405	15.1214	12.8346	9.69443	12.3338	10.4175	9.79594	10.3161	7.83546	8.89617
Smp_010720	Chr_7	2543844	2544278	0.434		16	8	21	9	0	3	5	7	0	2													Smp_010720	1.25781	0.647453	1.74579	0.758711	0	1.45633	3.57601	4.44415	0	0.660796
Smp_010770	Chr_7	2694989	2706430	11.441		2821	5639	3559	766	334	209	111	209	87	520													Smp_010770	8.41245	17.312	11.2234	2.44956	6.51951	3.84868	3.01146	5.03341	3.20803	6.51728
Smp_010800	Chr_7	2964072	2968224	4.152		384	297	739	879	36	39	29	37	34	60													Smp_010800	3.15542	2.51251	6.42169	7.7456	1.93632	1.97896	2.168	2.45541	3.45465	2.07215
Smp_010820	Chr_7	3021122	3030764	9.642		212	210	249	70	108	159	19	12	22	209													Smp_010820	0.750157	0.764998	0.931739	0.265616	2.50143	3.47424	0.611652	0.342921	0.962584	3.10818
Smp_010850	Chr_4	14745160	14746552	1.392		288	285	566	603	8	4	4	6	0	3													Smp_010850	7.0589	7.1914	14.6703	15.849	1.28346	0.605411	0.891947	1.18766	0	0.309036
Smp_010900	Chr_7	3440674	3441410	0.736		4948	4161	4180	4613	256	216	157	197	109	409													Smp_010900	229.369	198.577	204.909	229.313	77.6774	61.8309	66.2125	73.7511	62.4786	79.6843
Smp_010930	Chr_7	3511639	3539473	27.834		3069	4727	5425	3114	473	578	308	405	472	1311													Smp_010930	3.76188	5.9651	7.03212	4.09324	3.79506	4.37504	3.43473	4.00922	7.15401	6.75389
Smp_010940	Chr_7	3547632	3550214	2.582		52218	54669	53834	37365	5891	6135	2770	3160	1403	6607													Smp_010940	689.998	743.692	752.251	529.459	509.525	500.597	332.998	337.218	229.237	366.923
Smp_011000	Chr_6	15524796	15544122	19.326		271	289	709	679	279	372	58	60	43	329													Smp_011000	0.478422	0.525247	1.32363	1.28544	3.224	4.05537	0.931546	0.85544	0.938662	2.44107
Smp_011010	Chr_6	15505674	15513377	7.703		1698	1237	2390	2619	117	111	62	125	91	199													Smp_011010	7.52075	5.6405	11.1944	12.4394	3.39202	3.03594	2.49833	4.47126	4.98384	3.70442
Smp_011030	Chr_6	15461519	15464527	3.008		197	177	474	393	76	86	64	86	17	54													Smp_011030	2.23446	2.06682	5.68542	4.78012	5.64246	6.02352	6.6042	7.87773	2.38426	2.5742
Smp_011100	Chr_2	27411531	27428883	17.352		35	59	46	59	31	30	22	60	27	139													Smp_011100	0.068818	0.119429	0.0956468	0.124402	0.398974	0.364251	0.393542	0.952757	0.656443	1.14866
Smp_011120	Chr_2	27384651	27397090	12.439		9814	9845	9782	9268	1177	1277	805	963	540	1566													Smp_011120	26.9181	27.7996	28.3729	27.2599	21.1312	21.6289	20.0876	21.3315	18.3143	18.0523
Smp_011150	Chr_2	27288722	27293494	4.772		516	695	913	649	157	140	134	151	75	123													Smp_011150	3.68921	5.11555	6.90292	4.97586	7.34737	6.18098	8.71611	8.7188	6.63046	3.696
Smp_011180	Chr_2	27218092	27232005	13.913		0	0	4	3	18	19	41	41	47	16													Smp_011180	0	0	0.0103729	0.00788904	0.288924	0.287715	0.914705	0.811976	1.42515	0.164902
Smp_011220	Chr_2	27127772	27146525	18.753		76	81	156	124	93	107	51	48	43	144													Smp_011220	0.13827	0.151713	0.300135	0.241922	1.1075	1.20211	0.844146	0.705262	0.967343	1.10108
Smp_011230	Chr_2	27094045	27099870	5.825		1370	1392	1342	1544	123	147	76	123	54	191													Smp_011230	8.02432	8.39366	8.31225	9.69784	4.71565	5.31681	4.04982	5.81821	3.91094	4.7018
Smp_011270	Chr_2	27049915	27058467	8.552		2255	5000	7616	5947	5983	6773	5403	5317	3282	5537													Smp_011270	8.99627	20.5357	32.1308	25.4422	156.237	166.856	196.104	171.309	161.903	92.8397
Smp_011430	Chr_2	26420384	26428230	7.846		217	297	399	118	26	35	0	1	3	25													Smp_011430	0.943615	1.32959	1.83479	0.550247	0.740044	0.93983	0	0.0351182	0.161308	0.456898
Smp_011450	Chr_2	26312967	26313527	0.56		111	194	196	135	53	69	32	50	53	128													Smp_011450	6.76268	12.1681	12.6279	8.82002	21.1359	25.9592	17.737	24.6015	39.9274	32.7755
Smp_011560	Chr_ZW	19506646	19530418	23.772		1596	2145	3237	1117	1426	2018	158	181	261	4068													Smp_011560	2.29061	3.16935	4.91291	1.71914	13.3963	17.8848	2.06305	2.09794	4.63188	24.5382
Smp_011570	Chr_ZW	19546522	19547488	0.966		79044	66297	32753	31355	3062	3084	2208	2425	2059	4813													Smp_011570	2791.74	2410.6	1223.31	1187.55	707.882	672.615	709.48	691.695	899.212	714.44
Smp_011600	Chr_ZW	19612683	19613958	1.275		917	901	611	1207	118	132	41	34	57	208													Smp_011600	24.5382	24.8212	17.2899	34.6354	20.6683	21.8119	9.98141	7.34766	18.8603	23.3927
Smp_011640	Chr_ZW	23251042	23255076	4.034		227	286	261	174	103	123	5	14	10	203													Smp_011640	1.91988	2.49022	2.33435	1.57811	5.70209	6.4239	0.384727	0.956252	1.0458	7.21585
Smp_011660	Chr_ZW	23288651	23335719	47.068		1958	2656	2392	2121	1155	1173	354	369	223	1721													Smp_011660	1.41929	1.98203	1.83357	1.64869	5.4801	5.25051	2.33451	2.16013	1.99877	5.24303
Smp_011680	Chr_ZW	23396548	23422191	25.643		3877	7457	4235	1788	7995	7738	1773	2261	919	7736													Smp_011680	5.15835	10.2142	5.95864	2.55107	69.6277	63.5754	21.4614	24.2947	15.1192	43.2588
Smp_011690	Chr_ZW	23511340	23533541	22.201		85	266	199	31	121	151	8	10	11	360													Smp_011690	0.130626	0.42084	0.323402	0.0510873	1.21715	1.43296	0.11185	0.12411	0.209027	2.32518
Smp_011700	Chr_ZW	23539784	23560864	21.08		1311	1743	2132	1293	772	839	54	67	56	1624													Smp_011700	2.12185	2.90426	3.64904	2.24415	8.17861	8.38534	0.795136	0.875759	1.12073	11.047
Smp_011710	Chr_ZW	23567972	23581646	13.674		4259	4561	2651	2523	494	533	150	199	144	779													Smp_011710	10.6266	11.7158	6.99482	6.75065	8.06796	8.21223	3.40497	4.00994	4.44273	8.169
Smp_011720	Chr_ZW	23627145	23635863	8.718		4838	3624	2116	2513	360	436	185	153	106	485													Smp_011720	18.9336	14.6009	8.75711	10.5463	9.22185	10.5366	6.58678	4.83565	5.12946	7.97723
Smp_011740	Chr_ZW	23651589	23659010	7.421		1578	1118	699	688	91	107	83	114	94	134													Smp_011740	7.25485	5.2916	3.39842	3.39195	2.73849	3.03774	3.47163	4.23275	5.34378	2.58922
Smp_011830	Chr_ZW	23842197	23857888	15.691		2743	4069	5011	1626	1461	1348	387	465	249	2134													Smp_011830	5.96429	9.10846	11.5222	3.79135	20.7937	18.0996	7.65559	8.1655	6.69471	19.5016
Smp_011860	Chr_ZW	23941159	23956593	15.434		3511	3680	1680	2198	678	820	151	203	167	1031													Smp_011860	7.76133	8.37485	3.92729	5.21042	9.81033	11.1935	3.0368	3.62408	4.56479	9.57872
Smp_011870	Chr_ZW	23957019	23957840	0.821		43	5	7	13	4	12	361	334	197	17													Smp_011870	1.78694	0.213912	0.307622	0.579327	1.08805	3.07941	136.484	112.094	101.229	2.96915
Smp_011960	Chr_ZW	18401750	18425657	23.907		609	599	737	873	329	401	348	428	178	393													Smp_011960	0.869112	0.880055	1.11226	1.33602	3.07329	3.53386	4.51827	4.93286	3.14107	2.35719
Smp_011980	Chr_ZW	18558486	18565349	6.863		1870	2277	1229	1272	248	291	85	141	66	365													Smp_011980	9.29632	11.6535	6.46101	6.78105	8.06994	8.93323	3.84435	5.6609	4.05707	7.62616
Smp_011990	Chr_ZW	18579793	18601649	21.856		1592	2388	1515	669	830	1117	334	388	176	826													Smp_011990	2.48517	3.83771	2.50095	1.1199	8.48086	10.7674	4.74345	4.89149	3.39723	5.41922
Smp_012000	Chr_ZW	18619127	18624896	5.769		220	197	342	210	5	3	1	0	0	7													Smp_012000	1.30109	1.19943	2.13889	1.33181	0.193554	0.10956	0.0538044	0	0	0.17399
Smp_012010	Chr_6	7578845	7595406	16.561		585	1200	2466	1412	136	131	33	27	21	101													Smp_012010	1.20518	2.54509	5.3724	3.11941	1.83394	1.66653	0.618508	0.449218	0.534953	0.874504
Smp_012030	Chr_ZW	18712900	18728365	15.465		2739	2348	1568	1769	288	335	210	247	164	427													Smp_012030	6.04263	5.33281	3.65812	4.18506	4.15887	4.56378	4.2149	4.40076	4.4738	3.95918
Smp_012050	Chr_ZW	18787660	18787965	0.305		2209	1719	673	861	240	258	110	128	47	147													Smp_012050	247.104	197.963	79.6118	103.283	175.729	178.217	111.947	115.635	65.0101	69.1106
Smp_012070	Chr_ZW	18800757	18801535	0.778		3718	3462	1958	1665	224	296	118	172	151	490													Smp_012070	163.047	156.299	90.802	78.2994	64.2985	80.157	47.0783	60.9157	81.8805	90.3116
Smp_012110	Chr_ZW	18862899	18867307	4.408		9432	8534	4355	3979	993	954	371	343	147	856													Smp_012110	73.0039	68.0016	35.6458	33.026	50.3084	45.597	26.1246	21.4404	14.0689	27.8458
Smp_012150	Chr_ZW	18944403	18963105	18.702		1712	2272	1847	1449	744	691	201	241	174	1091													Smp_012150	3.1232	4.26706	3.56321	2.83468	8.88418	7.7843	3.336	3.55066	3.92504	8.36496
Smp_012200	Chr_ZW	19123003	19128218	5.215		2797	3003	1785	1968	440	383	99	144	125	758													Smp_012200	18.2988	20.226	12.3494	13.8068	18.8422	15.473	5.89249	7.60831	10.112	20.8421
Smp_012230	Chr_2	15983494	15983646	0.152		0	0	0	0	0	0	0	0	0	0													Smp_012230	0	0	0	0	0	0	0	0	0	0
Smp_012230.2	Chr_ZW	19175029	19175085	0.056		0	0	0	0	0	0	0	0	1	0													Smp_012230.2	0	0	0	0	0	0	0	0	7.53347	0
Smp_012280	Chr_2	15846920	15850402	3.482		7673	7786	8199	8737	988	932	711	978	633	1430													Smp_012280	75.1831	78.5405	84.9561	91.8031	63.3667	56.3919	63.381	77.391	76.6934	58.889
Smp_012340	Chr_2	15601243	15604248	3.005		3410	4376	4308	3492	577	523	389	447	334	872													Smp_012340	38.7163	51.1494	51.7242	42.5161	42.8809	36.668	40.1812	40.9867	46.8905	41.6101
Smp_012350	Chr_2	15577672	15597914	20.242		2150	2153	3037	2658	973	1017	235	287	231	1457													Smp_012350	3.62384	3.73593	5.41319	4.80425	10.7348	10.5852	3.60357	3.90669	4.81439	10.3213
Smp_012380	Chr_2	15399085	15454214	55.129		267	326	701	463	77	74	14	17	14	137													Smp_012380	0.16524	0.207704	0.458775	0.307273	0.31192	0.282801	0.0788254	0.0849668	0.107135	0.356342
Smp_012400	Chr_2	15378926	15382753	3.827		1004	1148	1196	1048	138	123	112	128	101	115													Smp_012400	8.95074	10.5364	11.2755	10.019	8.05292	6.77136	9.08401	9.21577	11.1339	4.3089
Smp_012410	Chr_2	15371680	15377567	5.887		3826	4826	4452	3242	291	351	184	255	192	490													Smp_012410	22.1735	28.794	27.285	20.1485	11.039	12.5615	9.70157	11.9351	13.7591	11.9352
Smp_012440	Chr_2	15264495	15274697	10.202		9065	9385	11234	7541	3976	4092	498	588	348	5441													Smp_012440	30.3156	32.3115	39.7293	27.0438	87.0349	84.5045	15.1517	15.8808	14.3905	76.4752
Smp_012450	Chr_1	21396210	21401084	4.874		2981	2391	1929	2187	118	125	76	90	46	127													Smp_012450	20.867	17.2307	14.2794	16.4167	5.40666	5.40324	4.84001	5.08788	3.98158	3.73633
Smp_012460	Chr_1	21401600	21404600	3		1747	2078	2321	2161	219	222	99	112	79	284													Smp_012460	19.8681	24.3294	27.9136	26.3546	16.3025	15.5905	10.2431	10.2867	11.1094	13.5745
Smp_012470	Chr_1	21409676	21416167	6.491		15918	15446	10797	8246	1414	1617	864	1078	784	1775													Smp_012470	83.6682	83.5819	60.0142	46.4789	48.6486	52.4841	41.3162	45.7601	50.9551	39.2115
Smp_012480	Chr_1	21428007	21444439	16.432		931	1413	1495	1223	255	299	203	222	158	436													Smp_012480	1.93305	3.02037	3.28256	2.72308	3.46563	3.83363	3.83463	3.72257	4.05648	3.80472
Smp_012530	Chr_1	21500077	21503403	3.326		4962	4203	4941	5879	434	375	247	318	181	698													Smp_012530	50.9	44.3859	53.5988	64.6703	29.1407	23.7541	23.0512	26.3442	22.9583	30.0926
Smp_012540	Chr_1	21513821	21519376	5.555		1313	1458	2234	1362	243	241	106	131	130	428													Smp_012540	8.06426	9.21895	14.5098	8.9705	9.76911	9.14034	5.92298	6.49782	9.87284	11.0481
Smp_012560	Chr_4	30704613	30715988	11.375		167	186	235	167	10	7	1	6	5	9													Smp_012560	0.500897	0.574341	0.745382	0.537142	0.196328	0.129651	0.0272877	0.145338	0.185439	0.113454
Smp_012570	Chr_1	21569058	21583627	14.569		5082	6950	8055	5245	760	611	253	302	201	825													Smp_012570	11.9011	16.7557	19.9479	13.1716	11.6497	8.8357	5.39025	5.7116	5.82035	8.11991
Smp_012580	Chr_1	21585541	21617908	32.367		1836	1589	2439	3456	758	655	177	196	147	1232													Smp_012580	1.93532	1.72437	2.71876	3.90656	5.22997	4.26352	1.69742	1.66853	1.91601	5.45802
Smp_012600	Chr_1	21661829	21663436	1.607		1	6	6	3	4	4	0	0	0	0													Smp_012600	0.0212309	0.131142	0.134709	0.0683013	0.555874	0.524413	0	0	0	0
Smp_012660	Chr_1	21838576	21840057	1.481		8	5	7	5	2	2	0	2	1	8													Smp_012660	0.184297	0.118583	0.170532	0.12352	0.301583	0.284515	0	0.372096	0.284858	0.774572
Smp_012670	Chr_1	21840033	21868786	28.753		143	97	264	457	48	57	14	30	7	111													Smp_012670	0.169682	0.118494	0.331271	0.581509	0.372813	0.417658	0.151134	0.287487	0.102706	0.553563
Smp_012680	Chr_1	21844529	21855858	11.329		17	23	33	88	12	4	1	0	0	29													Smp_012680	0.0511966	0.071309	0.105096	0.284194	0.23655	0.0743872	0.0273985	0	0	0.367057
Smp_012690	Chr_1	21868630	21876654	8.024		1718	1961	2584	2725	371	418	205	249	158	460													Smp_012690	7.30493	8.5841	11.6189	12.4251	10.3256	10.9753	7.93014	8.55044	8.30709	8.22042
Smp_012720	Chr_1	21917297	21940171	22.874		3292	4663	4359	2232	965	972	374	518	392	1802													Smp_012720	4.91022	7.1603	6.87554	3.57006	9.42145	8.95269	5.07514	6.23976	7.22981	11.2964
Smp_012740	Chr_1	21972423	21977429	5.006		2369	2088	3636	3429	714	855	342	506	208	862													Smp_012740	16.1457	14.6503	26.2057	25.0611	31.8522	35.9836	21.2057	27.8509	17.5289	24.6913
Smp_012750	Chr_1	21985243	21985847	0.604		59465	39804	38347	43448	1372	1251	2003	2494	1421	1952													Smp_012750	3358.99	2314.72	2290.64	2631.82	507.282	436.365	1029.35	1137.73	992.522	463.415
Smp_012780	Chr_1	22204940	22231091	26.151		937	1103	2251	2084	808	1146	121	120	104	1544													Smp_012780	1.22246	1.48148	3.10563	2.91563	6.9001	9.23264	1.4362	1.26437	1.67775	8.46615
Smp_012790	Chr_1	22244800	22246476	1.676		2941	2462	2878	3424	285	249	174	178	149	425													Smp_012790	59.8694	51.5967	61.9554	74.7452	37.9755	31.3008	32.225	29.2635	37.5055	36.3615
Smp_012800	Chr_1	22251977	22252386	0.409		5688	3676	4287	4160	259	284	168	184	132	389													Smp_012800	474.482	315.69	378.175	372.129	141.419	146.293	127.498	123.958	136.155	136.381
Smp_012810	Chr_1	22303222	22318060	14.838		1505	1090	1184	663	449	627	65	39	61	670													Smp_012810	3.46055	2.58023	2.87898	1.63479	6.75777	8.9027	1.35974	0.724218	1.73435	6.4748
Smp_012860	Chr_1	22440315	22447700	7.385		1399	1600	1970	2155	126	158	127	152	126	207													Smp_012860	6.46325	7.60987	9.62449	10.6763	3.81024	4.5075	5.33791	5.67118	7.19785	4.01927
Smp_012900	Chr_1	22660823	22670286	9.463		3678	4651	3227	2546	367	364	276	306	241	540													Smp_012900	13.2607	17.2634	12.3036	9.84358	8.66104	8.10405	9.05312	8.9099	10.7441	8.18261
Smp_012920	Chr_1	22700345	22705821	5.476		9	4	14	22	3	11	0	1	2	18													Smp_012920	0.0560741	0.0256569	0.0922416	0.146988	0.122346	0.423213	0	0.0503172	0.154081	0.471342
Smp_012930	Chr_1	22779570	22801774	22.204		2357	2739	2884	1981	480	376	2291	1715	1087	592													Smp_012930	3.6217	4.3328	4.68626	3.2642	4.82773	3.56768	32.0267	21.282	20.6529	3.82312
Smp_012950	Chr_3	13215309	13218258	2.949		140	181	475	499	59	76	22	52	7	36													Smp_012950	1.61971	2.15582	5.8114	6.19084	4.46797	5.42961	2.31561	4.85857	1.0014	1.75047
Smp_012970	Chr_3	13128056	13170826	42.77		6601	6562	8719	8518	1027	1157	490	654	528	2011													Smp_012970	5.26568	5.38896	7.35512	7.28655	5.36246	5.69933	3.55611	4.21326	5.20808	6.74217
Smp_012980	Chr_3	13111230	13122572	11.342		4044	4280	3629	3148	929	1186	622	763	514	1715													Smp_012980	12.1648	13.2545	11.5441	10.1547	18.2919	22.0305	17.0223	18.536	19.1186	21.6821
Smp_013040	Chr_3	12709526	12722895	13.369		10254	16827	12481	7289	5084	6213	3736	3727	3167	6679													Smp_013040	26.1684	44.2095	33.6831	19.9477	84.9257	97.9111	86.7413	76.8141	99.9383	71.6374
Smp_013050	Chr_3	12739131	12759446	20.315		588	633	1361	2092	165	157	74	82	65	282													Smp_013050	0.987516	1.09445	2.41715	3.76763	1.81384	1.62822	1.13066	1.11219	1.34983	1.99049
Smp_013060	Chr_3	12777730	12790219	12.489		1834	2535	2826	1958	256	328	126	115	122	398													Smp_013060	5.0102	7.12949	8.16407	5.73599	4.57767	5.53319	3.13156	2.53717	4.12112	4.56965
Smp_013070	Chr_3	12843788	12846604	2.816		4857	6354	5503	4218	414	488	285	269	266	750													Smp_013070	58.8463	79.2542	70.5065	54.8022	32.8322	36.5104	31.4145	26.3208	39.8503	38.1905
Smp_013080	Chr_3	12858805	12895283	36.478		203	197	471	463	126	111	10	22	11	218													Smp_013080	0.189867	0.189689	0.465856	0.46438	0.771387	0.641094	0.0850917	0.166177	0.127217	0.856944
Smp_013150	SC_0183	182973	187246	4.273		412	317	662	837	19	15	80	44	52	30													Smp_013150	3.28964	2.60576	5.58968	7.16665	0.993009	0.739585	5.81133	2.83727	5.13397	1.00674
Smp_013200	SC_0183	851	3111	2.26		69389	47309	47472	52238	4730	3341	7752	8661	3484	3063													Smp_013200	1047.53	735.264	757.864	845.672	467.396	311.457	1064.69	1055.94	650.358	194.342
Smp_013210	Chr_5.unplaced.SC_0198	441403	452275	10.872		59	84	147	84	7	8	8	7	2	11													Smp_013210	0.185151	0.27138	0.487832	0.282679	0.143788	0.155028	0.228401	0.177406	0.0776075	0.145081
Smp_013300	Chr_3	9095357	9100027	4.67		2568	2568	2238	2238	695	679	520	495	307	1015													Smp_013300	18.7612	19.3146	17.2904	17.5334	33.2354	30.6325	34.5625	29.2058	27.7335	31.1657
Smp_013310	Chr_3	9071586	9090033	18.447		70	85	185	78	59	75	6	14	11	149													Smp_013310	0.129466	0.161846	0.361833	0.154701	0.714264	0.856574	0.100959	0.209114	0.251565	1.15821
Smp_013360	Chr_3	8636973	8643573	6.6		6018	6051	3608	3772	676	668	514	445	326	704													Smp_013360	31.1094	32.2026	19.7235	20.9099	22.8736	21.3237	24.1734	18.5779	20.838	15.2952
Smp_013370	Chr_3	8632694	8637044	4.35		2848	2697	2719	2275	393	350	234	309	183	507													Smp_013370	22.3375	21.7771	22.5518	19.1344	20.176	16.9515	16.6972	19.5726	17.7478	16.7127
Smp_013440	Chr_3	8414117	8433782	19.665		946	902	1247	1042	411	473	416	386	259	507													Smp_013440	1.64127	1.61109	2.28789	1.93864	4.66746	5.06753	6.56625	5.40846	5.55634	3.69693
Smp_013460	Chr_3	8338417	8349061	10.644		4595	4801	4713	4150	889	885	958	920	578	1308													Smp_013460	14.7287	15.8429	15.9755	14.2648	18.6522	17.5173	27.9369	23.8157	22.909	17.621
Smp_013470	Chr_3	8324374	8325273	0.899		76606	54971	56763	68547	3423	2587	5548	6059	2568	3483													Smp_013470	2907.28	2147.74	2278.07	2789.67	850.315	606.27	1915.56	1857.04	1205.09	555.547
Smp_013520	Chr_3	8036745	8054374	17.629		1547	1652	1976	2421	341	293	224	223	194	447													Smp_013520	2.99396	3.29147	4.0441	5.02448	4.31976	3.50162	3.94401	3.48544	4.64255	3.63586
Smp_013540	Chr_3	7974264	7978742	4.478		0	1	6	16	1	0	767	1081	569	1													Smp_013540	0	0.00784375	0.0483425	0.130725	0.049871	0	53.1654	66.5153	53.6057	0.0320216
Smp_013560	SC_0187	169659	170927	1.268		265	212	213	305	54	102	13	10	4	63													Smp_013560	7.13034	5.87252	6.0607	8.80044	9.51058	16.9477	3.18231	2.17301	1.33083	7.1244
Smp_013570	Chr_3	7918119	7919105	0.986		257	321	933	700	37	101	146	129	79	84													Smp_013570	8.89283	11.435	34.1403	25.9744	8.38026	21.5811	45.9615	36.049	33.8013	12.216
Smp_013600	Chr_3	9917141	9919856	2.715		3	5	4	2	0	0	0	0	0	0													Smp_013600	0.0376995	0.0646857	0.053156	0.0269516	0	0	0	0	0	0
Smp_013610	Chr_3	9871181	9882261	11.08		210	278	468	223	54	52	9	15	28	79													Smp_013610	0.646641	0.881278	1.52394	0.736358	1.0884	0.988765	0.252128	0.37302	1.06611	1.02238
Smp_013630	Chr_3	10125419	10146296	20.877		478	623	1040	483	129	142	32	23	22	248													Smp_013630	0.781166	1.04816	1.79733	0.846453	1.37992	1.43301	0.475773	0.303557	0.444567	1.70338
Smp_013690	Chr_1	5411994	5436121	24.127		2828	2836	3409	2931	427	387	253	300	192	521													Smp_013690	3.99908	4.12868	5.09784	4.44464	3.95237	3.37938	3.25488	3.42609	3.35723	3.09643
Smp_013790	Chr_2.unplaced.SC_0120	302564	306392	3.828		15447	20208	16045	9507	1894	2027	1231	1408	1035	2614													Smp_013790	137.675	185.421	151.227	90.8647	110.494	111.561	99.8169	101.347	114.065	97.9176
Smp_013810	Chr_2.unplaced.SC_0120	314862	317871	3.009		1702	1450	3524	7888	156	234	73	74	91	325													Smp_013810	19.2984	16.926	42.2548	95.911	11.578	16.3841	7.53041	6.77626	12.7586	15.4877
Smp_013840	Chr_2.unplaced.SC_0120	384830	402364	17.534		7217	9267	12571	12621	1941	2029	759	1054	609	2787													Smp_013840	14.043	18.5638	25.8673	26.3352	24.7216	24.3798	13.4363	16.563	14.6528	22.792
Smp_013860	Chr_2.unplaced.SC_0120	438381	469532	31.151		384	607	904	790	639	780	341	338	219	1025													Smp_013860	0.420574	0.684423	1.04703	0.927852	4.58101	5.27536	3.39782	2.98968	2.96589	4.71823
Smp_013870	Chr_2.unplaced.SC_0120	484698	487735	3.037		2526	2472	3274	2623	600	611	234	297	191	745													Smp_013870	28.3774	28.5898	38.8952	31.5993	44.1204	42.3863	23.916	26.9459	26.5321	35.1754
Smp_013930	Chr_2.unplaced.SC_0120	578259	595249	16.99		1639	2186	2099	1634	325	332	209	230	189	594													Smp_013930	3.29131	4.51923	4.4574	3.5187	4.27191	4.11694	3.81831	3.73005	4.69301	5.01326
Smp_013950	Chr_2.unplaced.SC_0120	607070	614429	7.359		277	268	645	411	238	205	292	184	123	278													Smp_013950	1.28424	1.27916	3.1623	2.04337	7.22255	5.86901	12.3164	6.88937	7.0513	5.41693
Smp_013970	Chr_2.unplaced.SC_0120	657192	667783	10.591		889	897	1735	1521	10	12	52	47	39	20													Smp_013970	2.86384	2.97484	5.91051	5.25431	0.210861	0.238712	1.524	1.22276	1.5535	0.270782
Smp_014010	Chr_2.unplaced.SC_0120	709698	726400	16.702		8518	8989	8880	8268	1438	1731	494	600	522	2551													Smp_014010	17.4001	18.9039	19.1826	18.1116	19.2275	21.8352	9.18072	9.89835	13.1851	21.9013
Smp_014020	Chr_2.unplaced.SC_0120	740440	751520	11.08		1620	1678	1896	2543	344	285	194	211	157	427													Smp_014020	4.98837	5.31937	6.17392	8.39712	6.93348	5.41919	5.43476	5.24714	5.97782	5.52605
Smp_014050	Chr_ZW	49136291	49159612	23.321		1443	2047	3007	2912	277	309	216	278	152	409													Smp_014050	2.11107	3.08304	4.65209	4.56844	2.65256	2.79152	2.87491	3.28457	2.74966	2.5148
Smp_014060	Chr_ZW	49159705	49160016	0.311		170	93	182	401	22	33	16	27	33	51													Smp_014060	18.6497	10.5034	21.1141	47.1745	15.7977	22.3554	15.969	23.9212	44.7648	23.5146
Smp_014080	Chr_ZW	49185996	49201778	15.782		212	238	314	234	23	36	8	17	6	19													Smp_014080	0.458308	0.529691	0.717844	0.542472	0.325461	0.480585	0.157343	0.296802	0.160388	0.172631
Smp_014170	Chr_1	18787007	18803290	16.283		5538	8171	11075	6599	3129	3482	890	1159	757	4865													Smp_014170	11.6039	17.6258	24.5398	14.8275	42.9145	45.053	16.9658	19.6123	19.613	42.8426
Smp_014260	Chr_1	19250938	19253718	2.78		28	15	34	48	18	31	8	5	8	44													Smp_014260	0.343635	0.18952	0.441262	0.631713	1.44597	2.34934	0.89323	0.495571	1.21403	2.26952
Smp_014270	Chr_1	19262083	19266355	4.272		2712	2370	1660	1176	87	85	52	104	74	136													Smp_014270	21.6592	19.4861	14.0197	10.0716	4.548	4.19196	3.77825	6.70783	7.30775	4.56494
Smp_014280	Chr_1	19277012	19284435	7.423		874	792	1293	954	75	81	51	88	51	144													Smp_014280	4.01713	3.7476	6.28465	4.70211	2.25639	2.29898	2.1326	3.26651	2.8985	2.7817
Smp_014290	Chr_1	19293681	19309818	16.137		2570	2006	4039	3981	394	407	187	180	177	777													Smp_014290	5.43368	4.36633	9.03053	9.02595	5.45263	5.31375	3.59697	3.07348	4.62736	6.90439
Smp_014400	SC_0037	2060638	2065118	4.48		7000	6822	9422	9511	1200	1309	817	966	616	1186													Smp_014400	53.3094	53.4862	75.88	77.6733	59.8185	61.5589	56.606	59.4127	58.0077	37.9607
Smp_014410	SC_0037	1984263	2001851	17.588		142	69	283	628	26	26	17	6	8	48													Smp_014410	0.275458	0.137797	0.58054	1.30637	0.330133	0.311449	0.30002	0.0939972	0.191892	0.391338
Smp_014420	SC_0037	1940515	1952079	11.564		53	32	116	93	12	3	2	3	1	12													Smp_014420	0.156369	0.0971963	0.36192	0.294238	0.231743	0.0546566	0.0536834	0.0714815	0.0364817	0.148799
Smp_014430	SC_0037	1933801	1937468	3.667		16	7	35	26	5	4	0	0	0	3													Smp_014430	0.148865	0.0670494	0.344365	0.25941	0.304503	0.229815	0	0	0	0.117311
Smp_014440	SC_0037	1899393	1908147	8.754		79	226	360	150	101	120	91	109	23	104													Smp_014440	0.307896	0.906797	1.48374	0.626915	2.5766	2.88805	3.22666	3.43084	1.10842	1.70355
Smp_014570	Chr_2	12203680	12223487	19.807		1214	3283	10159	9316	6112	7997	4175	4479	3345	8032													Smp_014570	2.09114	5.82184	18.5052	17.2082	68.9124	85.0625	65.4268	62.3078	71.246	58.1476
Smp_014610	Chr_2	12305890	12319484	13.594		10	1	11	9	322	120	53590	68214	37894	116													Smp_014610	0.0250978	0.00258381	0.0291949	0.0242225	5.28982	1.85979	1223.64	1382.63	1176	1.2236
Smp_014620	Chr_2	12326416	12334203	7.787		1699	1631	2143	2405	187	200	301	390	264	275													Smp_014620	7.44401	7.35685	9.9292	11.2997	5.36295	5.41115	11.9982	13.7999	14.3027	5.06395
Smp_014650	Chr_2	12403624	12404390	0.766		37252	23235	18804	22968	1276	1015	1804	1973	1064	1297													Smp_014650	1659.22	1065.42	885.694	1097.03	372.01	279.169	731.014	709.706	585.998	242.794
Smp_014660	Chr_2	12423257	12424609	1.352		8362	7781	7190	8473	1697	1512	461	598	405	2129													Smp_014660	211.017	202.147	191.873	229.29	280.309	235.616	105.838	121.872	126.375	225.801
Smp_014670	Chr_2	12485566	12513416	27.85		8889	12622	13704	8677	2619	2344	710	984	597	3898													Smp_014670	10.8896	15.9188	17.7535	11.399	21.0011	17.7322	7.91318	9.73532	9.04341	20.0698
Smp_014680	Chr_2	12532790	12534530	1.74		56	66	120	123	25	43	5	15	7	57													Smp_014680	1.09805	1.3323	2.48825	2.5863	3.20866	5.20653	0.891947	2.37532	1.69719	4.69735
Smp_014730	Chr_2	12656132	12664466	8.334		151	124	339	451	36	30	51	48	43	46													Smp_014730	0.618169	0.522608	1.4676	1.97992	0.964676	0.758398	1.89948	1.58697	2.1767	0.791464
Smp_014780	Chr_2	12740482	12773546	33.064		5533	8258	10759	7353	3332	4002	850	889	542	3392													Smp_014780	5.70938	8.77258	11.7403	8.13641	22.5052	25.5006	7.97961	7.40844	6.91555	14.7105
Smp_014800	Chr_2	12866992	12867821	0.829		1059	1229	1827	1986	644	719	207	271	165	1199													Smp_014800	43.5838	52.0721	79.5145	87.6493	173.486	182.727	77.5058	90.0731	83.9677	207.392
Smp_014820	Chr_2	12887236	12915151	27.915		423	535	686	346	202	191	24	31	14	214													Smp_014820	0.516995	0.673169	0.886643	0.453484	1.61602	1.44154	0.266865	0.305988	0.211579	1.09927
Smp_014840	Chr_2	12947376	12948961	1.585		217	304	320	170	158	179	11	25	2	137													Smp_014840	4.67105	6.73678	7.28422	3.92413	22.2618	23.7932	2.15418	4.34601	0.532333	12.3942
Smp_014850	Chr_2	12961308	12972440	11.132		1078	1548	1959	1145	263	222	141	239	175	383													Smp_014850	3.30392	4.88434	6.34926	3.76319	5.27613	4.20155	3.93155	5.91568	6.63205	4.93347
Smp_015020	Chr_3	26930814	26970775	39.961		2060	2118	1946	1655	426	357	76	69	25	484													Smp_015020	1.75879	1.86165	1.75699	1.51525	2.38071	1.88218	0.590331	0.475766	0.263929	1.73675
Smp_015030	Chr_3	26993520	27011061	17.541		560	338	551	677	172	200	46	54	59	237													Smp_015030	1.08922	0.676816	1.13334	1.41208	2.18981	2.40218	0.813995	0.848242	1.41899	1.93741
Smp_015050	Chr_3	27027724	27055957	28.233		725	714	1388	1071	447	530	101	139	119	696													Smp_015050	0.876122	0.888279	1.77376	1.38789	3.53576	3.95502	1.11041	1.35656	1.77817	3.53492
Smp_015070	Chr_3	27091781	27104411	12.63		1191	1269	2339	1943	823	985	389	397	341	1219													Smp_015070	3.2173	3.52912	6.68173	5.62851	14.5522	16.4309	9.56014	8.66099	11.3903	13.8397
Smp_015090	Chr_3	27173887	27199090	25.203		5459	7108	9132	5287	887	971	942	1141	744	1381													Smp_015090	7.39	9.90611	13.073	7.67504	7.85966	8.11702	11.6016	12.4742	12.4539	7.85721
Smp_015100	Chr_3	27212373	27218593	6.22		314	295	1786	2505	35	51	45	31	6	37													Smp_015100	1.72236	1.66586	10.3598	14.7347	1.25664	1.72747	2.24564	1.37326	0.406953	0.852979
Smp_015160	SC_0126	756179	756451	0.272		0	0	0	0	0	0	0	0	0	0													Smp_015160	0	0	0	0	0	0	0	0	0	0
Smp_015190	SC_0126	697773	701782	4.009		3	16	17	10	28	34	2	0	6	75													Smp_015190	0.0255311	0.140182	0.152994	0.0912615	1.55975	1.78679	0.15485	0	0.631391	2.68258
Smp_015220	SC_0126	661118	670783	9.665		1314	1462	2287	2386	341	294	309	225	189	322													Smp_015220	4.6385	5.31317	8.53742	9.03217	7.87925	6.40877	9.92373	6.41447	8.24979	4.77728
Smp_015390	Chr_ZW	47972320	47982735	10.415		1892	2078	2926	2891	600	769	176	205	204	842													Smp_015390	6.19791	7.008	10.1362	10.1558	12.8654	15.556	5.24531	5.42344	8.26331	11.5926
Smp_015440	Chr_ZW	47856235	47858949	2.714		642	653	845	729	129	143	110	159	89	185													Smp_015440	8.07066	8.45106	11.2333	9.82746	10.6148	11.1008	12.5806	16.1424	13.8345	9.77437
Smp_015480	Chr_ZW	20831209	20835042	3.833		1709	1574	1147	1360	591	755	62	55	33	654													Smp_015480	15.212	14.4236	10.7966	12.9815	34.4335	41.499	5.02078	3.9537	3.6321	24.4662
Smp_015490	Chr_ZW	20840324	20840944	0.62		0	0	1	0	0	0	0	0	0	0													Smp_015490	0	0	0.058193	0	0	0	0	0	0	0
Smp_015510	Chr_ZW	20874947	20880349	5.402		2781	2116	3027	3449	160	222	108	144	101	261													Smp_015510	17.5643	13.7584	20.2172	23.3594	6.61451	8.65821	6.20565	7.34494	7.88769	6.92808
Smp_015520	Chr_ZW	20888362	20896315	7.953		1185	1140	1353	1241	113	161	65	88	53	231													Smp_015520	5.0836	5.0348	6.13803	5.70906	3.17307	4.26505	2.53688	3.04882	2.81143	4.16493
Smp_015530	Chr_ZW	20906099	20908420	2.321		25613	32617	25790	17542	2354	2316	1148	1449	1150	2912													Smp_015530	376.503	493.602	400.902	276.521	226.498	210.229	153.527	172.018	209.029	179.905
Smp_015630	Chr_ZW	21160112	21162338	2.226		112	207	196	59	53	70	5	2	11	87													Smp_015630	1.71663	3.26628	3.17682	0.969729	5.3172	6.62525	0.697209	0.247563	2.08473	5.6043
Smp_015670	Chr_ZW	21323551	21324495	0.944		1421	1349	1252	924	114	141	7	11	8	225													Smp_015670	51.3577	50.1936	47.8514	35.8116	26.969	31.4685	2.30168	3.21071	3.5752	34.1773
Smp_015690	Chr_ZW	21405088	21421797	16.709		7647	9626	8793	7138	1856	1554	1384	1809	1513	3682													Smp_015690	15.6144	20.235	18.9867	15.6297	24.8062	19.5943	25.7101	29.831	38.2007	31.5981
Smp_015710	Chr_ZW	21457393	21497386	39.993		1462	1654	2198	2014	184	195	92	111	71	288													Smp_015710	1.24723	1.45265	1.98292	1.84246	1.02746	1.02726	0.714039	0.76475	0.748958	1.03261
Smp_015720	Chr_ZW	21511525	21523036	11.511		14931	14662	12479	10471	942	817	946	1205	539	1131													Smp_015720	44.2547	44.7392	39.1137	33.2812	18.2755	14.9534	25.5092	28.8439	19.7542	14.0889
Smp_015730	Chr_ZW	21533577	21534375	0.798		14639	10617	9461	9741	590	694	486	495	495	1625													Smp_015730	625.882	467.312	427.756	446.606	165.113	183.226	189.039	170.916	261.689	291.996
Smp_015760	Chr_ZW	21652347	21658394	6.047		8	19	15	7	9	40	3	0	1	35													Smp_015760	0.0451371	0.110363	0.089498	0.0423528	0.33238	1.39364	0.153992	0	0.0697659	0.829956
Smp_015780	Chr_ZW	21693507	21712012	18.505		460	510	914	1333	183	177	110	125	66	202													Smp_015780	0.84811	0.968031	1.78205	2.63551	2.20849	2.01518	1.84511	1.86123	1.50466	1.56527
Smp_015800	Chr_ZW	21740771	21763726	22.955		1531	1640	2293	2489	273	374	230	301	107	231													Smp_015800	2.27552	2.50943	3.60403	3.96708	2.65594	3.43261	3.11006	3.61301	1.96648	1.44298
Smp_015820	Chr_ZW	21838741	21867073	28.332		19	19	77	110	1	3	1	1	0	4													Smp_015820	0.0228802	0.0235551	0.0980563	0.142049	0.00788234	0.0223087	0.0109557	0.0097253	0	0.0202446
Smp_015840	Chr_ZW	22003104	22007258	4.154		3026	3696	5050	5504	589	615	371	467	136	514													Smp_015840	24.8534	31.2517	43.8619	48.477	31.6651	31.1916	27.7221	30.9764	13.812	17.7429
Smp_015850	Chr_ZW	22022508	22025017	2.509		3484	3398	3705	5578	686	774	391	459	333	1251													Smp_015850	47.3763	47.5697	53.2782	81.3395	61.0599	64.9935	48.372	50.4072	55.9921	71.4963
Smp_015860	Chr_ZW	22028959	22031834	2.875		2976	3151	2382	2158	328	311	240	277	74	406													Smp_015860	35.3166	38.4963	29.8928	27.4623	25.4782	22.7904	25.9114	26.5474	10.8587	20.2495
Smp_015880	Chr_ZW	22086780	22110427	23.647		1320	1432	2190	3064	192	222	94	119	163	504													Smp_015880	1.9045	2.12704	3.34141	4.74063	1.81325	1.97791	1.23387	1.3866	2.908	3.0562
Smp_015900	Chr_4	21298538	21305212	6.674		1733	1783	3008	2603	267	254	142	200	164	446													Smp_015900	8.85923	9.38368	16.2612	14.2696	8.93424	8.0182	6.6042	8.25703	10.3667	9.58243
Smp_015920	Chr_4	21273744	21274802	1.058		0	7	8	3	1	0	0	0	0	0													Smp_015920	0	0.232392	0.272814	0.103743	0.21108	0	0	0	0	0
Smp_015980	Chr_4	21157274	21159207	1.933		8027	5001	7776	8710	801	833	510	542	254	1279													Smp_015980	141.679	90.8726	145.14	164.858	92.5408	90.791	81.8948	77.2587	55.4351	94.8781
Smp_016050	Chr_1	1643175	1675834	32.659		9435	12495	10600	8473	1339	1270	970	1094	609	1986													Smp_016050	9.8565	13.4382	11.7102	9.49201	9.15609	8.19276	9.21907	9.22985	7.86679	8.71974
Smp_016090	Chr_1	1840787	1877833	37.046		2145	3524	4901	3746	776	927	345	466	330	1669													Smp_016090	1.97547	3.3412	4.77316	3.69956	4.67792	5.27191	2.89065	3.46597	3.75799	6.46014
Smp_016130	Chr_1	2139869	2145760	5.891		3765	2433	3529	4293	166	164	79	132	87	302													Smp_016130	21.8052	14.5064	21.6135	26.6622	6.29291	5.86522	4.16252	6.17398	6.23036	7.35098
Smp_016180	Chr_1	1992094	2041514	49.42		0	0	0	0	0	0	0	0	0	0													Smp_016180	0	0	0	0	0	0	0	0	0	0
Smp_016200	Chr_1	1950101	1970724	20.623		3107	3297	4609	3147	563	561	308	278	333	997													Smp_016200	5.14012	5.61533	8.06338	5.58301	6.09662	5.73113	4.63572	3.71427	6.81201	6.93219
Smp_016230	Chr_4	27351162	27363534	12.372		12	39	109	47	53	49	1	1	2	65													Smp_016230	0.0330921	0.110722	0.317869	0.138989	0.956684	0.834422	0.0250887	0.022271	0.0681982	0.753356
Smp_016240	Chr_4	27470796	27476870	6.074		22	100	80	33	9	5	8	11	0	12													Smp_016240	0.123575	0.578273	0.475201	0.198776	0.330903	0.17343	0.408821	0.498997	0	0.283292
Smp_016250	Chr_4	27493044	27498671	5.627		2471	2404	3006	2695	110	117	74	107	71	142													Smp_016250	14.9823	15.006	19.2741	17.5229	4.36564	4.38065	4.082	5.23947	5.3231	3.61858
Smp_016340	Chr_4	27775747	27790076	14.329		1759	1431	2181	1784	293	277	125	159	82	342													Smp_016340	4.18826	3.50777	5.49164	4.55515	4.56651	4.0728	2.70777	3.05746	2.41424	3.42245
Smp_016380	Chr_4	27946180	27957836	11.656		1467	2012	3175	2595	182	183	35	35	45	271													Smp_016380	4.29402	6.06298	9.8278	8.14538	3.48702	3.30774	0.932044	0.827368	1.62872	3.33386
Smp_016390	Chr_4	27962761	27963541	0.78		2781	2652	2952	2465	1106	1113	362	407	337	1735													Smp_016390	121.644	119.423	136.548	115.623	316.66	300.628	144.056	143.774	182.271	318.957
Smp_016410	Chr_4	28002917	28024218	21.301		7510	11729	10884	6578	1090	874	877	1022	724	1767													Smp_016410	12.0288	19.3406	18.4353	11.2984	11.4277	8.64452	12.7796	13.22	14.3391	11.895
Smp_016490	Chr_4	28239005	28254087	15.082		529	1186	3271	3086	3992	4873	3093	3428	1748	4556													Smp_016490	1.19669	2.76206	7.82499	7.48619	59.1104	68.0718	63.656	62.6271	48.8951	43.3164
Smp_016510	Chr_4	28279458	28287871	8.413		675	502	794	1465	142	121	37	41	35	150													Smp_016510	2.73739	2.09585	3.40512	6.37104	3.76938	3.03015	1.36511	1.34281	1.75509	2.55663
Smp_016540	Chr_4	28432087	28436182	4.095		1	0	12	3	5	1	4	3	0	2													Smp_016540	0.00833162	0	0.105728	0.0268035	0.272677	0.0514488	0.303197	0.201859	0	0.0700331
Smp_016550	Chr_4	28436169	28456630	20.461		1137	1260	2253	1776	210	177	106	141	120	290													Smp_016550	1.89591	2.16298	3.9728	3.1757	2.29205	1.82254	1.60804	1.89877	2.47421	2.03235
Smp_016600	Chr_6	16407773	16467989	60.216		719	1153	1032	327	641	709	60	55	58	1178													Smp_016600	0.407381	0.672551	0.618344	0.198682	2.37727	2.48064	0.309284	0.25167	0.406349	2.80518
Smp_016630	Chr_6	16610289	16666073	55.784		2324	3680	3284	1390	385	463	110	133	58	611													Smp_016630	1.42138	2.31711	2.12401	0.911652	1.54129	1.74864	0.61207	0.656935	0.438633	1.57057
Smp_016640	SC_0255	11180	19318	8.138		689	849	1741	2411	230	266	118	160	90	329													Smp_016640	2.88858	3.66436	7.71868	10.8393	6.31165	6.88642	4.50072	5.4173	4.6656	5.79703
Smp_016670	Chr_6	16777080	16782367	5.287		3722	2738	3142	3304	233	266	127	118	84	410													Smp_016670	24.0188	18.19	21.4417	22.8641	9.84191	10.5999	7.45611	6.14969	6.70275	11.1199
Smp_016680	Chr_6	16797927	16800176	2.249		23	11	17	9	3	7	1	0	1	3													Smp_016680	0.348917	0.171795	0.272723	0.146412	0.297896	0.65575	0.138016	0	0.187583	0.191275
Smp_016730	Chr_6	17009644	17013566	3.922		184	183	334	445	20	29	9	36	41	56													Smp_016730	1.60064	1.6389	3.07257	4.15122	1.13882	1.55783	0.712284	2.52915	4.41021	2.04742
Smp_016750	Chr_6	17077581	17078534	0.953		6	0	3	1	0	0	0	0	0	0													Smp_016750	0.214804	0	0.113577	0.0383911	0	0	0	0	0	0
Smp_016780	Chr_6	17167149	17168681	1.532		21162	16112	8279	10909	2350	2432	86	115	34	2506													Smp_016780	471.283	369.402	194.976	260.525	342.564	334.452	17.4244	20.6833	9.36274	234.558
Smp_016810	Chr_6	17260927	17286446	25.519		438	649	809	582	97	121	80	145	59	216													Smp_016810	0.585591	0.893283	1.14379	0.834417	0.848869	0.998967	0.973071	1.56561	0.975374	1.21372
Smp_016840	Chr_6	17392384	17426737	34.353		2077	3968	3762	3055	533	593	226	310	193	866													Smp_016840	2.06279	4.05709	3.95108	3.25365	3.46494	3.6368	2.04203	2.48644	2.37015	3.61477
Smp_016870	Chr_6	17573132	17584183	11.051		1096	1370	1996	1136	45	33	78	104	59	35													Smp_016870	3.38371	4.35439	6.5166	3.76098	0.909376	0.629132	2.19084	2.59306	2.25234	0.454144
Smp_016880	Chr_6	17587472	17623573	36.101		2248	2017	2432	1922	149	183	101	125	91	249													Smp_016880	2.12452	1.96243	2.43056	1.94786	0.921721	1.06798	0.868401	0.95405	1.06342	0.989025
Smp_016890	Chr_6	17633970	17638017	4.047		1941	2042	3144	2892	145	192	138	172	120	363													Smp_016890	16.3635	17.7227	28.0293	26.145	8.00143	9.99534	10.5843	11.7105	12.5092	12.8618
Smp_016900	Chr_6	17638846	17642893	4.047		1129	1128	1317	1034	100	109	152	151	165	218													Smp_016900	9.51797	9.79003	11.7413	9.34784	5.51822	5.67444	11.6581	10.2807	17.2002	7.72414
Smp_016910	Chr_6	17645441	17648220	2.779		448	415	537	558	65	69	111	140	37	49													Smp_016910	5.50013	5.24527	6.97185	7.34631	5.22345	5.23106	12.398	13.881	5.61689	2.52834
Smp_016920	Chr_6	17659916	17682776	22.86		139	190	236	87	51	70	46	26	11	59													Smp_016920	0.207454	0.291934	0.372476	0.139241	0.498226	0.645136	0.624597	0.313384	0.203002	0.370086
Smp_016990	Chr_ZW	57524248	57534890	10.642		3730	3870	2378	1642	193	183	195	229	130	272													Smp_016990	11.9583	12.7731	8.06215	5.64513	4.05011	3.62291	5.68761	5.92915	5.15351	3.66499
Smp_017010	Chr_ZW	57459872	57470351	10.479		7408	11852	11128	10031	1730	1801	1465	1940	1424	2990													Smp_017010	24.1193	39.7265	38.3142	35.0226	36.8688	36.2096	43.3946	51.0108	57.3288	40.9146
Smp_017020	Chr_ZW	57389668	57402472	12.804		0	2	1	0	0	0	0	0	0	0													Smp_017020	0	0.00548646	0.00281784	0	0	0	0	0	0	0
Smp_017070	Chr_ZW	57068727	57092405	23.678		5252	5346	5296	4741	957	1051	571	545	390	1385													Smp_017070	7.56769	7.93034	8.06984	7.32569	9.02609	9.35163	7.4853	6.34208	6.94868	8.38749
Smp_017080	Chr_ZW	57041146	57066600	25.454		2129	3043	5725	4588	599	761	327	391	391	1187													Smp_017080	2.85367	4.19908	8.11487	6.59464	5.25537	6.2988	3.98758	4.23254	6.48043	6.68685
Smp_017090	Chr_ZW	57019088	57023431	4.343		605	712	864	813	92	94	59	68	91	185													Smp_017090	4.7528	5.75835	7.17771	6.84896	4.73076	4.56003	4.21677	4.31419	8.83964	6.10814
Smp_017110	Chr_ZW	56968331	56968786	0.455		304	499	451	252	49	70	31	30	18	131													Smp_017110	22.7953	38.521	35.7625	20.2634	24.0501	32.4128	21.148	18.1673	16.6895	41.2845
Smp_017230	Chr_2	33471361	33511364	40.003		639	723	1157	813	134	160	134	174	100	190													Smp_017230	0.544994	0.634825	1.04353	0.74357	0.748074	0.842669	1.03975	1.1985	1.05461	0.681064
Smp_017240	Chr_2	33537596	33538153	0.557		0	0	0	0	2	0	4	1	0	0													Smp_017240	0	0	0	0	0.801876	0	2.22907	0.494681	0	0
Smp_017280	Chr_2	33776525	33777098	0.573		32056	23486	21019	22252	2775	2160	4379	4937	1530	2598													Smp_017280	1908.7	1439.67	1323.49	1420.82	1081.54	794.198	2372.13	2374.04	1126.47	650.147
Smp_017290	Chr_2	33780778	33785145	4.367		920	908	1566	1469	99	93	144	150	139	194													Smp_017290	7.18767	7.30316	12.9381	12.3073	5.06273	4.48672	10.2352	9.4643	13.4281	6.37009
Smp_017350	Chr_2	33884435	33890337	5.902		613	407	723	564	76	106	3	8	9	154													Smp_017350	3.5436	2.42216	4.41979	3.49626	2.87572	3.78387	0.157776	0.373483	0.643319	3.74152
Smp_017360	Chr_2	33893318	33905767	12.449		21612	23173	21084	15414	1794	1568	1491	1816	953	1740													Smp_017360	59.2303	65.3816	61.1056	45.3007	32.1826	26.5363	37.1759	40.194	32.2955	20.042
Smp_017420	Chr_3.unplaced.SC_0174	201973	219332	17.359		676	397	941	1275	198	157	23	26	31	348													Smp_017420	1.32863	0.803293	1.95581	2.68726	2.54726	1.90548	0.411265	0.412695	0.75339	2.87463
Smp_017430	Chr_3.unplaced.SC_0105	786494	788767	2.273		59420	57526	45109	42441	11291	12969	3642	3733	2234	15131													Smp_017430	891.901	888.941	716.021	683.14	1109.34	1202.09	497.346	452.521	414.636	954.543
Smp_017450	Chr_3.unplaced.SC_0105	705047	723540	18.493		21970	14121	20332	22669	1205	1078	1576	1920	1814	2543													Smp_017450	40.5328	26.8204	39.6675	44.8486	14.5517	12.2812	26.4525	28.6071	41.3821	19.7181
Smp_017470	Chr_3.unplaced.SC_0105	641982	653667	11.685		1390	1085	2528	2215	180	291	190	156	133	320													Smp_017470	4.05854	3.26144	7.80568	6.93536	3.44014	5.24679	5.04711	3.67855	4.80182	3.92689
Smp_017520	Chr_3.unplaced.SC_0105	434198	467983	33.785		102	179	282	139	101	109	50	66	85	147													Smp_017520	0.103005	0.186096	0.301153	0.150527	0.667621	0.679723	0.459372	0.53827	1.0614	0.623908
Smp_017610	Chr_3	6390072	6410101	20.029		19	20	34	23	442	475	1	1	0	552													Smp_017610	0.0323652	0.0350735	0.0612466	0.0420138	4.92828	4.99648	0.0154974	0.0137569	0	3.95191
Smp_017620	Chr_3	6415368	6420051	4.683		18	9	24	22	73	88	0	2	0	121													Smp_017620	0.131139	0.0675035	0.184905	0.171879	3.48122	3.95902	0	0.117676	0	3.705
Smp_017640	Chr_3	6443574	6452332	8.758		1462	1238	2141	2776	110	102	76	106	63	190													Smp_017640	5.69542	4.96505	8.82011	11.5968	2.80492	2.45372	2.69356	3.33489	3.03472	3.11083
Smp_017650	Chr_3	6454656	6485217	30.561		1032	1067	2192	2906	169	208	104	118	157	369													Smp_017650	1.15211	1.22632	2.58783	3.47898	1.23496	1.43392	1.05629	1.06389	2.16728	1.73135
Smp_017660	Chr_3	6503871	6513797	9.926		4269	3092	5784	5280	677	561	450	494	218	573													Smp_017660	14.6736	10.9414	21.024	19.4618	15.2317	11.9074	14.072	13.713	9.26542	8.27766
Smp_017670	Chr_3	6523759	6539302	15.543		200	614	646	335	96	133	48	79	36	97													Smp_017670	0.439014	1.38753	1.49955	0.788558	1.37933	1.80279	0.958572	1.40047	0.977126	0.894878
Smp_017710	Chr_ZW	4361632	4383957	22.325		410	490	478	328	365	423	42	48	40	513													Smp_017710	0.626579	0.770926	0.7725	0.537534	3.65119	3.99189	0.58395	0.59242	0.755878	3.29498
Smp_017720	Chr_ZW	4305332	4323249	17.917		35	26	66	53	4	6	1	0	1	6													Smp_017720	0.0666479	0.0509702	0.132905	0.108227	0.0498571	0.070553	0.0173242	0	0.023546	0.048019
Smp_017730	Chr_ZW	4187203	4302502	115.299		6646	10656	8967	3932	9507	12089	955	974	587	18515													Smp_017730	1.96661	3.24621	2.80598	1.2477	18.4141	22.0899	2.57096	2.32763	2.14781	23.0264
Smp_017750	Chr_ZW	31924567	31937606	13.039		3511	4657	5422	5991	654	725	356	386	251	784													Smp_017750	9.18692	12.545	15.003	16.8104	11.2012	11.7145	8.47469	8.15686	8.12105	8.62182
Smp_017810	Chr_ZW	32143644	32182011	38.367		2377	4168	6710	5424	924	1040	380	461	406	856													Smp_017810	2.11376	3.81573	6.30996	5.17232	5.37832	5.71091	3.07428	3.31073	4.46428	3.19921
Smp_017830	Chr_ZW	32193306	32194388	1.082		12175	8856	14319	14599	1187	1288	569	699	428	2255													Smp_017830	383.906	287.487	477.472	493.65	244.994	250.795	163.231	178.004	166.878	298.845
Smp_017860	Chr_ZW	32427462	32433522	6.06		153	132	307	432	49	40	27	16	10	37													Smp_017860	0.861395	0.765084	1.8278	2.60816	1.80574	1.39065	1.38296	0.727491	0.696162	0.8755
Smp_017870	Chr_ZW	32448958	32456768	7.81		83	79	178	270	33	43	0	9	4	72													Smp_017870	0.362586	0.355291	0.822302	1.26484	0.943616	1.15997	0	0.31752	0.216069	1.32193
Smp_017880	Chr_ZW	32526758	32528970	2.212		1041	1020	1159	1124	141	182	53	37	24	229													Smp_017880	16.0564	16.1966	18.9043	18.5911	14.2353	17.3347	7.43719	4.6089	4.5773	14.8449
Smp_017890	Chr_ZW	32529508	32536951	7.443		3733	4169	3445	2737	270	350	198	238	219	645													Smp_017890	17.1117	19.674	16.6995	13.454	8.10118	9.90717	8.25725	8.81067	12.4131	12.4262
Smp_017900	Chr_ZW	32550658	32610587	59.929		753	627	1192	1166	381	378	173	182	122	420													Smp_017900	0.428688	0.367484	0.717631	0.711845	1.41978	1.32888	0.89604	0.836786	0.858827	1.00494
Smp_017980	Chr_ZW	32908062	32908355	0.293		0	0	0	0	0	0	0	0	0	0													Smp_017980	0	0	0	0	0	0	0	0	0	0
Smp_017990	Chr_ZW	32911026	32911509	0.483		2480	1703	1492	1487	121	96	82	92	70	176													Smp_017990	175.181	123.844	111.451	112.639	55.9462	41.8749	52.6969	52.4833	61.1412	52.2508
Smp_018010	Chr_ZW	32977857	32991754	13.897		981	1407	2106	1125	135	99	271	300	247	163													Smp_018010	2.40842	3.55616	5.46764	2.9618	2.16943	1.50087	6.05294	5.94813	7.49823	1.68187
Smp_018020	Chr_ZW	33004570	33006783	2.213		7235	5926	6030	5550	549	573	421	418	313	1006													Smp_018020	111.543	94.0564	98.3101	91.7562	55.4018	54.551	59.0499	52.0445	59.6686	65.1844
Smp_018030	Chr_ZW	33008539	33014793	6.254		1029	1178	1525	1438	183	215	124	133	158	341													Smp_018030	5.6136	6.616	8.7978	8.41249	6.5347	7.24286	6.15435	5.85968	10.6582	7.8185
Smp_018120	Chr_ZW	33315753	33374204	58.451		9	12	20	6	2	6	0	0	1	5													Smp_018120	0.00525332	0.00721103	0.0123453	0.00375563	0.00764136	0.0216266	0	0	0.00721757	0.0122661
Smp_018150	Chr_ZW	33443588	33496285	52.697		1596	1639	2076	1741	595	441	574	803	372	551													Smp_018150	1.03331	1.09245	1.42136	1.20875	2.52153	1.76312	3.38099	4.19865	2.9781	1.49931
Smp_018160	Chr_ZW	33505914	33568813	62.899		1093	1143	1471	1275	202	208	81	84	77	232													Smp_018160	0.592871	0.638279	0.843784	0.741635	0.7172	0.696705	0.399723	0.367973	0.516452	0.528897
Smp_018170	Chr_ZW	33574748	33576289	1.541		387	516	780	333	74	73	16	6	7	85													Smp_018170	8.56825	11.7613	18.2622	7.90615	10.7241	9.98044	3.22282	1.07282	1.91637	7.9094
Smp_018210	Chr_ZW	33691081	33692692	1.611		4252	4674	3474	2930	352	429	281	324	146	487													Smp_018210	90.0495	101.906	77.803	66.542	48.7955	56.1037	54.1413	55.4153	38.2332	43.3471
Smp_018220	SC_0186	13152	23222	10.07		3775	4543	4684	2935	478	495	364	531	496	908													Smp_018220	12.79	15.8461	16.7822	10.6636	10.6006	10.3563	11.2199	14.5293	20.7795	12.9296
Smp_018230	SC_0186	29912	30193	0.281		0	0	0	0	0	0	0	0	0	0													Smp_018230	0	0	0	0	0	0	0	0	0	0
Smp_018240	SC_0186	44480	55435	10.955		36456	50128	34477	20410	6874	6639	4051	4701	2480	7066													Smp_018240	113.538	160.722	113.548	68.1639	140.13	127.679	114.78	118.238	95.5041	92.4886
Smp_018250	Chr_3	4362665	4389034	26.369		11483	12962	15308	9501	9896	9921	674	789	656	20812													Smp_018250	14.8575	17.2658	20.9453	13.1825	83.8105	79.2668	7.93386	8.24449	10.4953	113.174
Smp_018260	Chr_3	4332920	4350248	17.328		4199	4745	3823	2913	842	932	198	311	146	1185													Smp_018260	8.26763	9.61824	7.96009	6.15058	10.8517	11.3318	3.54679	4.94529	3.55457	9.80612
Smp_018280	Chr_3	4243507	4265006	21.499		3648	4793	3986	3167	248	271	272	435	292	360													Smp_018280	5.78922	7.83064	6.68931	5.38956	2.57612	2.65571	3.92707	5.57508	5.72991	2.40111
Smp_018290	Chr_3	4225799	4242487	16.688		1069	1367	1533	925	274	295	150	131	111	251													Smp_018290	2.18553	2.87721	3.31436	2.02797	3.66673	3.72432	2.79001	2.16295	2.80609	2.15673
Smp_018310	Chr_3	4182610	4182997	0.387		1418	1118	1488	1881	416	395	353	418	325	1312													Smp_018310	125.011	101.47	138.725	177.829	240.057	215.038	283.127	297.609	354.287	486.127
Smp_018360	Chr_3	4079611	4096639	17.028		1647	1538	3092	3968	1206	1472	457	515	409	2221													Smp_018360	3.3	3.17249	6.55146	8.52573	15.8167	18.2127	8.33049	8.33343	10.1331	18.703
Smp_018400	Chr_3	3822998	3835108	12.11		1324	1181	1183	1444	125	116	111	107	67	152													Smp_018400	3.73016	3.42542	3.52454	4.36261	2.30515	2.0181	2.8451	2.43456	2.33407	1.79981
Smp_018430	Chr_3	3795638	3798522	2.884		592	555	792	1182	128	113	96	117	75	227													Smp_018430	7.00342	6.75936	9.90814	14.995	9.91168	8.25492	10.3322	11.1782	10.9711	11.2865
Smp_018440	Chr_3	3715725	3723979	8.254		52	61	194	80	29	32	68	84	46	77													Smp_018440	0.214943	0.259581	0.848007	0.354609	0.784632	0.816799	2.55719	2.80411	2.35113	1.33768
Smp_018460	Chr_3	3661663	3689304	27.641		1236	1342	2694	2393	214	247	193	243	195	341													Smp_018460	1.52563	1.70532	3.51646	3.16747	1.72899	1.88266	2.16731	2.42233	2.97621	1.769
Smp_018480	Chr_3	3648518	3650837	2.319		295	313	487	470	27	31	38	33	18	58													Smp_018480	4.34015	4.7408	7.57688	7.41516	2.60013	2.81637	5.08629	3.92097	3.27457	3.58636
Smp_018490	Chr_3	3634403	3647140	12.737		98	157	409	536	44	39	8	24	28	89													Smp_018490	0.262508	0.432953	1.15856	1.53965	0.771468	0.6451	0.194958	0.519188	0.927414	1.00196
Smp_018500	Chr_3	3632735	3638203	5.468		230	189	315	287	22	14	8	23	12	15													Smp_018500	1.4351	1.21406	2.07847	1.92034	0.898518	0.539423	0.454129	1.15899	0.925839	0.39336
Smp_018510	Chr_3	3626442	3630313	3.871		95	108	124	113	8	16	5	8	8	16													Smp_018510	0.837306	0.97996	1.15574	1.06802	0.461529	0.870816	0.400927	0.569439	0.871866	0.592685
Smp_018530	Chr_3	3573026	3574067	1.041		24147	20146	21840	21043	2628	2542	1984	2285	1329	3011													Smp_018530	791.4	679.745	756.945	739.572	563.777	514.463	591.574	604.805	538.589	414.751
Smp_018550	Chr_3	3442534	3456392	13.858		1431	1436	3978	3341	1462	1761	405	467	244	1791													Smp_018550	3.52308	3.63967	10.3568	8.82063	23.5602	26.7725	9.07136	9.28531	7.42801	18.532
Smp_018570	Chr_3	3401950	3413349	11.399		678	1047	1213	1354	187	167	225	254	228	311													Smp_018570	2.0293	3.22617	3.83934	4.34586	3.66359	3.08659	6.1268	6.1397	8.43822	3.9122
Smp_018580	Chr_3	3383043	3395084	12.041		615	720	847	608	75	93	24	36	26	95													Smp_018580	1.74259	2.10028	2.53795	1.84742	1.39101	1.62723	0.618681	0.823797	0.910948	1.13133
Smp_018590	Chr_3	3370002	3381289	11.287		1	5	9	10	6	16	0	0	0	10													Smp_018590	0.00302277	0.0155596	0.0287691	0.0324149	0.118715	0.298656	0	0	0	0.127042
Smp_018610	Chr_3	3326488	3337441	10.953		6877	6036	6106	4557	833	646	229	286	205	864													Smp_018610	21.4215	19.3564	20.1134	15.2219	16.9842	12.4259	6.48964	7.19471	7.89594	11.3112
Smp_018620	Chr_3	3291409	3318401	26.992		3966	4309	4602	6167	422	425	170	206	176	559													Smp_018620	5.01304	5.60724	6.1514	8.35916	3.49148	3.31729	1.95493	2.10287	2.75081	2.96964
Smp_018640	Chr_3	3258615	3267006	8.391		446	429	718	848	125	154	44	51	21	133													Smp_018640	1.81345	1.79577	3.08726	3.69748	3.32682	3.86666	1.62764	1.6747	1.05582	2.27282
Smp_018670	Chr_3	3129644	3155392	25.748		43	48	66	38	23	24	11	8	3	22													Smp_018670	0.0569782	0.0654796	0.0924832	0.0539963	0.199488	0.19638	0.132607	0.0856104	0.0491542	0.12252
Smp_018680	Chr_3	3116613	3121392	4.779		1762	1810	2052	1543	248	313	119	144	86	438													Smp_018680	12.5792	13.303	15.4918	11.8128	11.589	13.7987	7.72908	8.30244	7.59179	13.1421
Smp_018690	Chr_3	3102368	3103713	1.345		58	46	122	58	18	19	5	7	8	33													Smp_018690	1.47126	1.20128	3.27265	1.57772	2.9887	2.97619	1.15389	1.43402	2.50929	3.51819
Smp_018710	Chr_3	2961893	2969186	7.293		2785	2780	3032	1913	338	399	133	148	115	452													Smp_018710	13.0287	13.389	14.9998	9.59693	10.3501	11.5265	5.66061	5.5916	6.65234	8.88708
Smp_018720	Chr_3	2954189	2959416	5.227		17	18	52	72	5	1	4	0	5	9													Smp_018720	0.110963	0.120956	0.358933	0.503969	0.213624	0.0403067	0.237534	0	0.403553	0.246898
Smp_018730	Chr_3	2937322	2952571	15.249		72	69	248	334	22	13	15	11	18	63													Smp_018730	0.161092	0.158934	0.586776	0.801362	0.322191	0.17961	0.305329	0.198761	0.497983	0.592415
Smp_018760	SC_0170	553113	567346	14.233		16290	23645	17791	11238	1657	1718	950	1110	693	2245													Smp_018760	39.0488	58.3513	45.0989	28.8879	25.9991	25.4306	20.7179	21.4885	20.5409	22.6176
Smp_018790	SC_0170	505919	527918	21.999		1673	2130	4201	3512	1111	1602	541	659	614	2985													Smp_018790	2.59464	3.40083	6.88988	5.84084	11.2783	15.3423	7.6333	8.25397	11.7747	19.4567
Smp_018800	Chr_3	23573831	23577966	4.135		105	146	54	29	3	5	0	1	0	6													Smp_018800	0.866358	1.24018	0.471173	0.256594	0.162024	0.254756	0	0.0666354	0	0.208067
Smp_018870	Chr_3	23844919	23859685	14.766		71	112	184	176	50	46	105	178	151	57													Smp_018870	0.164051	0.266418	0.449591	0.436087	0.756205	0.656333	2.20721	3.32152	4.31417	0.553527
Smp_018880	Chr_3	23864818	23867828	3.01		0	0	0	0	0	2	1	0	0	0													Smp_018880	0	0	0	0	0	0.139989	0.103122	0	0	0
Smp_018890	Chr_3	23909025	23915046	6.021		21718	25536	18518	13678	4390	3882	1586	1605	1026	5604													Smp_018890	123.065	148.968	110.965	83.1147	162.828	135.836	81.7622	73.4491	71.8889	133.462
Smp_018920	Chr_3	24062707	24063276	0.569		0	6	15	4	2	7	0	1	0	7													Smp_018920	0	0.37038	0.951133	0.2572	0.784965	2.59188	0	0.484248	0	1.76406
Smp_018930	Chr_3	24073631	24077403	3.772		1824	1692	2179	1713	23	51	141	162	76	44													Smp_018930	16.4982	15.7557	20.8424	16.6153	1.36172	2.84858	11.6029	11.8338	8.50012	1.67266
Smp_018940	Chr_3	24078458	24081203	2.745		95	47	163	223	11	20	0	3	0	21													Smp_018940	1.18077	0.6014	2.14243	2.97226	0.894917	1.53503	0	0.301134	0	1.09699
Smp_018950	Chr_3	24087355	24101215	13.86		907	1170	2119	2067	127	123	85	147	140	214													Smp_018950	2.23269	2.96504	5.51607	5.45633	2.04632	1.8697	1.90359	2.92236	4.26136	2.214
Smp_018980	Chr_3	24342700	24389147	46.447		285	306	516	411	17	38	1	0	0	55													Smp_018980	0.209349	0.231404	0.400824	0.323749	0.081738	0.172368	0.00668283	0	0	0.169798
Smp_018990	Chr_3	24462605	24463373	0.768		41959	29685	24351	24493	1860	1248	2594	3031	1266	1476													Smp_018990	1864.01	1357.64	1143.98	1166.82	540.859	342.36	1048.4	1087.44	695.433	275.583
Smp_019000	Chr_3	24483924	24485466	1.542		0	0	0	0	0	0	0	0	0	0													Smp_019000	0	0	0	0	0	0	0	0	0	0
Smp_019010	Chr_3	24497703	24504654	6.951		20066	23475	16287	10309	1091	1148	964	1109	756	1717													Smp_019010	98.4911	118.622	84.5388	54.2616	35.0518	34.7956	43.0475	43.9607	45.8836	35.4201
Smp_019030	Chr_3	24556997	24566473	9.476		5073	7154	10526	8146	2968	3605	3319	3595	2158	3566													Smp_019030	18.2652	26.5175	40.0775	31.4516	69.9474	80.1511	108.718	104.533	96.0748	53.9614
Smp_019040	Chr_3	24584826	24610975	26.149		531	689	949	813	116	128	81	107	81	176													Smp_019040	0.692824	0.925491	1.3094	1.13752	0.990685	1.0313	0.961497	1.12748	1.30681	0.965127
Smp_019050	Chr_3	24636496	24637121	0.625		3671	2466	4285	6118	292	381	256	291	170	490													Smp_019050	200.396	138.587	247.362	358.14	104.336	128.432	127.139	128.29	114.75	112.42
Smp_019060	Chr_3	24640708	24644514	3.806		14467	9430	7939	9668	372	577	492	552	519	979													Smp_019060	129.686	87.0264	75.2591	92.9376	21.8276	31.9401	40.1249	39.9623	57.5283	36.8843
Smp_019100	Chr_1.unplaced.SC_0010	2370197	2380221	10.024		3106	3847	4178	3284	655	785	516	538	500	1243													Smp_019100	10.5717	13.48	15.038	11.9863	14.5926	16.499	15.9782	14.7884	21.0432	17.781
Smp_019130	Chr_1.unplaced.SC_0010	2188350	2211335	22.985		1585	1767	1584	1489	113	132	109	108	88	213													Smp_019130	2.35271	2.70023	2.48641	2.37014	1.09791	1.20993	1.47197	1.29467	1.61518	1.32881
Smp_019170	Chr_1.unplaced.SC_0010	2018592	2045868	27.276		4218	5490	9352	8714	522	587	170	235	170	788													Smp_019170	5.27606	7.06968	12.3705	11.6885	4.27388	4.53406	1.93458	2.37393	2.62937	4.1426
Smp_019190	Chr_1.unplaced.SC_0010	1986946	1994732	7.786		2583	3255	3138	2617	510	581	333	426	315	945													Smp_019190	11.3186	14.684	14.5412	12.2974	14.6281	15.7214	13.2754	15.0756	17.0679	17.4038
Smp_019200	Chr_1.unplaced.SC_0010	1967238	1967711	0.473		3	0	0	0	12	14	0	0	0	6													Smp_019200	0.216393	0	0	0	5.66569	6.23586	0	0	0	1.81894
Smp_019210	Chr_1.unplaced.SC_0010	1851125	1851751	0.626		42	53	77	68	36	14	0	0	2	35													Smp_019210	2.28907	2.97378	4.43791	3.97428	12.8428	4.71176	0	0	1.34784	8.01716
Smp_019260	Chr_1.unplaced.SC_0010	1729756	1742197	12.441		2238	2309	3017	3365	430	441	237	260	173	577													Smp_019260	6.13746	6.51893	8.74948	9.89586	7.71873	7.46815	5.91305	5.75835	5.86643	6.6504
Smp_019280	Chr_1.unplaced.SC_0010	1688048	1724099	36.051		250	227	572	553	235	232	90	79	30	211													Smp_019280	0.236595	0.221165	0.572454	0.561218	1.45574	1.35581	0.774896	0.603796	0.351064	0.839252
Smp_019310	Chr_1.unplaced.SC_0010	1506959	1509645	2.686		80	80	71	98	848	1144	84	68	55	1089													Smp_019310	1.01617	1.04615	0.953706	1.33488	70.5054	89.7325	9.70714	6.97563	8.63853	58.1365
Smp_019340	Chr_1.unplaced.SC_0010	1456136	1462238	6.102		4111	3116	3896	5200	469	639	240	234	223	698													Smp_019340	22.9858	17.9363	23.0361	31.1785	17.1646	22.0627	12.2084	10.5663	15.4176	16.4025
Smp_019350	Chr_1.unplaced.SC_0010	1429098	1435466	6.368		4770	4060	8161	5674	1065	2123	235	227	177	2198													Smp_019350	25.5564	22.394	46.2384	32.5994	37.349	70.2387	11.4547	9.82207	11.7261	49.4939
Smp_019380	Chr_1.unplaced.SC_0010	1369882	1376012	6.13		3869	3937	3980	3925	366	354	196	314	155	525													Smp_019380	21.5339	22.5586	23.4253	23.4263	13.3338	12.1667	9.92462	14.114	10.6673	12.2808
Smp_019420	Chr_1.unplaced.SC_0010	1310640	1311048	0.408		1422	1033	1443	1651	31	36	13	17	3	49													Smp_019420	118.911	88.93	127.605	148.051	16.9681	18.5897	9.89011	11.4807	3.10202	17.2212
Smp_019430	Chr_1.unplaced.SC_0010	1299224	1300347	1.123		5541	5329	5888	5057	842	851	538	549	298	842													Smp_019430	168.342	166.676	189.169	164.754	167.442	159.654	148.703	134.702	111.949	107.513
Smp_019440	Chr_1.unplaced.SC_0010	1278742	1279366	0.624		8002	6995	8200	6449	855	687	434	534	235	635													Smp_019440	437.52	393.741	474.123	378.122	305.995	231.954	215.885	235.796	158.879	145.92
Smp_019460	Chr_1.unplaced.SC_0010	1182584	1187726	5.142		0	0	6	6	0	0	1	2	0	0													Smp_019460	0	0	0.0420999	0.0426916	0	0	0.0603651	0.107171	0	0
Smp_019490	Chr_1.unplaced.SC_0010	1043944	1046610	2.666		1134	1469	1526	1488	262	324	166	158	161	460													Smp_019490	14.5123	19.354	20.6517	20.4205	21.9469	25.6044	19.3271	16.3297	25.477	24.7414
Smp_019610	Chr_ZW	28267764	28269113	1.349		1355	1277	855	798	238	208	55	62	26	244													Smp_019610	34.2698	33.2496	22.8674	21.6429	39.4001	32.4849	12.6552	12.6637	8.13101	25.9361
Smp_019620	SC_0187	228560	240161	11.601		2341	2698	1713	1913	271	255	136	153	130	373													Smp_019620	6.88477	8.16873	5.32751	6.03314	5.21683	4.63099	3.63883	3.63393	4.72749	4.61042
Smp_019630	SC_0187	243174	253936	10.762		7259	7836	4310	3586	564	583	224	306	124	620													Smp_019630	23.0127	25.5746	14.4493	12.191	11.7036	11.4131	6.4606	7.83445	4.86084	8.26087
Smp_019640	SC_0187	279403	283588	4.185		3222	3230	2888	2456	400	478	253	269	214	714													Smp_019640	26.2672	27.1091	24.898	21.4712	21.345	24.0637	18.7648	17.7108	21.5725	24.4641
Smp_019680	SC_0187	380931	393473	12.542		4236	4303	2665	3630	961	1005	343	352	214	1371													Smp_019680	11.5232	12.0507	7.66642	10.5892	17.1115	16.8822	8.48878	7.73314	7.1983	15.6746
Smp_019690	SC_0187	396372	398211	1.839		23774	23127	7887	6953	1339	1531	541	651	519	1826													Smp_019690	441.067	441.718	154.736	138.329	162.604	175.397	91.3132	97.5393	119.061	142.379
Smp_019730	SC_0187	516600	520111	3.511		11564	8769	5222	5238	1644	1777	372	480	376	2897													Smp_019730	112.373	87.7258	53.6622	54.5831	104.569	106.632	32.8875	37.6696	45.1793	118.316
Smp_019750	SC_0136	36657	37442	0.785		25093	23044	8243	6764	1901	1769	617	704	343	2322													Smp_019750	1090.6	1031.09	378.859	315.252	540.81	474.775	243.968	247.106	184.335	424.15
Smp_019760	SC_0136	44253	69458	25.205		486	575	403	447	27	17	26	28	22	43													Smp_019760	0.65786	0.801289	0.576873	0.64885	0.239227	0.142099	0.320188	0.306092	0.36823	0.24463
Smp_019790	SC_0136	209761	238744	28.983		1580	2529	2280	1745	459	624	164	156	127	795													Smp_019790	1.85993	3.06488	2.83827	2.2028	3.53673	4.53598	1.75638	1.48307	1.8486	3.93324
Smp_019810	SC_0136	410631	412553	1.922		286	300	249	329	24	43	8	3	13	60													Smp_019810	5.07687	5.48246	4.67421	6.26277	2.78863	4.71351	1.29198	0.430079	2.85347	4.47636
Smp_019820	SC_0136	368698	376394	7.696		2265	2218	1226	1211	109	144	48	49	26	128													Smp_019820	10.0412	10.1229	5.74761	5.75709	3.16296	3.94209	1.93595	1.75433	1.42525	2.38491
Smp_019840	SC_0136	392074	410575	18.501		3025	4066	1878	1964	464	509	205	253	168	630													Smp_019840	5.57845	7.71934	3.66237	3.88392	5.60087	5.79632	3.43935	3.76795	3.83087	4.88284
Smp_019860	Chr_1	17350673	17370666	19.993		2296	1926	1910	2088	79	76	49	63	51	131													Smp_019860	3.91812	3.38366	3.44681	3.82099	0.882433	0.800876	0.76074	0.868246	1.07616	0.939551
Smp_019880	Chr_1	17374719	17375854	1.135		3321	2892	3365	3930	288	358	226	286	212	530													Smp_019880	99.829	89.4974	106.967	126.684	56.6669	66.4533	61.806	69.4305	78.7994	66.9587
Smp_019890	Chr_1	17375988	17406405	30.417		1029	1021	1783	1640	224	194	154	165	139	273													Smp_019890	1.1542	1.17901	2.11494	1.97266	1.64461	1.34374	1.57153	1.49468	1.92789	1.28698
Smp_019900	Chr_1	17420554	17431601	11.047		1848	2375	4101	2670	540	642	121	152	208	1195													Smp_019900	5.70744	7.5514	13.3939	8.84282	10.9165	12.2439	3.39985	3.79122	7.94332	15.5114
Smp_019920	Chr_1	17471202	17476932	5.73		899	653	1153	1341	76	89	63	71	33	101													Smp_019920	5.35289	4.00282	7.26	8.56245	2.96204	3.27239	3.41275	3.41416	2.42964	2.52752
Smp_019940	Chr_1	17494232	17504273	10.041		1994	2488	3676	3627	722	717	353	417	284	1082													Smp_019940	6.77535	8.70325	13.2087	13.2158	16.0581	15.0443	10.9123	11.443	11.9323	15.4517
Smp_019950	Chr_1	17559129	17572608	13.479		1580	1217	3196	3568	452	487	159	145	105	895													Smp_019950	3.99929	3.17133	8.55483	9.68481	7.48882	7.61204	3.66149	2.96408	3.28636	9.52122
Smp_019980	Chr_1	17330403	17344943	14.54		3473	3845	4162	3758	899	929	518	617	445	1211													Smp_019980	8.14937	9.28838	10.3276	9.45619	13.8079	13.4611	11.0582	11.6923	12.9116	11.9428
Smp_019990	Chr_1	17320340	17323398	3.058		1683	972	2584	3470	271	319	99	134	112	565													Smp_019990	18.7772	11.1644	30.4872	41.516	19.7908	21.9777	10.0488	12.0739	15.4512	26.4934
Smp_020040	Chr_1	17243119	17257181	14.062		11633	11059	11860	11078	1526	1533	1182	1319	697	1688													Smp_020040	28.2246	27.6234	30.4298	28.8229	24.2348	22.9681	26.0909	25.8451	20.9107	17.2128
Smp_020050	Chr_1	17238072	17241317	3.245		5220	5450	7172	5189	1029	1083	438	627	333	1372													Smp_020050	54.8832	58.9915	79.7421	58.505	70.8163	70.3142	41.8965	53.2394	43.2925	60.6271
Smp_020060	Chr_1	17223554	17239430	15.876		3860	4436	5195	3807	427	414	374	383	363	785													Smp_020060	8.29526	9.81428	11.8061	8.77335	6.00647	5.494	7.31221	6.64719	9.64603	7.09015
Smp_020070	Chr_1	17152354	17191930	39.576		7651	8505	17701	12307	3060	3605	397	508	672	6908													Smp_020070	6.59584	7.54832	16.1372	11.3774	17.2672	19.1912	3.1137	3.53681	7.16342	25.0292
Smp_020080	Chr_1	17118997	17135559	16.562		129	217	462	391	367	341	155	187	77	353													Smp_020080	0.265742	0.460209	1.00645	0.863749	4.94864	4.33782	2.90494	3.11106	1.96138	3.05625
Smp_020090	Chr_1	17101131	17113027	11.896		382	497	704	532	71	76	130	121	106	125													Smp_020090	1.09558	1.46745	2.13518	1.63619	1.33288	1.34599	3.39204	2.80262	3.75913	1.50673
Smp_020120	Chr_1	16847871	16851495	3.624		1331	1011	1208	1614	101	119	71	88	63	188													Smp_020120	12.5306	9.79876	12.0265	16.2944	6.22395	6.91812	6.08119	6.69075	7.33391	7.43869
Smp_020130	Chr_1	16837382	16840220	2.838		711	780	1162	540	100	74	9	5	8	212													Smp_020130	8.54753	9.65362	14.7726	6.96154	7.86901	5.4935	0.984347	0.485443	1.18922	10.7115
Smp_020170	Chr_1	16502899	16670812	167.913		79	92	164	290	73	103	45	40	34	93													Smp_020170	0.0160519	0.0192447	0.0352389	0.0631884	0.0970892	0.129236	0.0831853	0.0656381	0.0854235	0.0794192
Smp_020200	Chr_1	16409311	16424673	15.362		930	1153	1664	1591	372	384	253	352	232	591													Smp_020200	2.06547	2.63627	3.90812	3.78919	5.40789	5.26639	5.112	6.31357	6.37123	5.51654
Smp_020210	Chr_1	16382503	16393205	10.702		3603	4237	3900	3161	372	397	366	416	235	375													Smp_020210	11.4864	13.906	13.1481	10.8065	7.76266	7.81547	10.6153	10.7105	9.26373	5.02451
Smp_020220	Chr_1	16395297	16398901	3.604		5162	4136	3770	3468	352	416	376	389	288	592													Smp_020220	48.8671	40.3092	37.7415	35.2061	21.8117	24.3186	32.3833	29.7403	33.7125	23.554
Smp_020270	Chr_1	16213671	16277461	63.79		674	887	1601	1694	338	375	51	62	36	430													Smp_020270	0.360488	0.488404	0.905526	0.971593	1.1833	1.23853	0.248162	0.267805	0.238085	0.966591
Smp_020300	Chr_1	16138959	16165222	26.263		2021	3008	4254	3310	851	860	201	258	158	987													Smp_020300	2.62546	4.02292	5.84407	4.61113	7.23632	6.89896	2.37558	2.7068	2.53802	5.3889
Smp_020340	Chr_1	16061828	16070222	8.394		1006	1547	1176	510	365	340	29	48	20	415													Smp_020340	4.08896	6.47335	5.05476	2.22293	9.71083	8.53374	1.07238	1.57562	1.00518	7.08935
Smp_020360	Chr_1	16016065	16016385	0.32		2596	2055	2770	4201	349	411	173	249	308	1119													Smp_020360	276.782	225.564	312.314	480.315	243.561	270.596	167.809	214.402	406.054	501.426
Smp_020370	Chr_1	16002655	16015479	12.824		3361	3985	4088	2682	2209	2206	1561	1912	929	1843													Smp_020370	8.94188	10.9147	11.5014	7.65172	38.4685	36.2419	37.7831	41.0813	30.5615	20.6077
Smp_020400	Chr_1	15975452	15981476	6.024		726	741	1026	857	161	152	96	106	80	214													Smp_020400	4.11183	4.32057	6.14504	5.20499	5.96861	5.31604	4.94657	4.84843	5.60258	5.09396
Smp_020450	Chr_1	15615518	15632166	16.648		2303	2606	3327	2960	639	703	225	274	250	922													Smp_020450	4.71971	5.4982	7.21029	6.50509	8.57179	8.89657	4.19506	4.53491	6.33521	7.94138
Smp_020460	SC_0169	24215	24706	0.491		6547	7612	4961	2302	0	1	1	4	3	1													Smp_020460	454.93	544.534	364.544	171.533	0	0.42909	0.632174	2.2447	2.57764	0.292042
Smp_020480	SC_0560	9171	11123	1.952		640	889	1226	1556	42	40	125	161	115	121													Smp_020480	11.1862	15.9967	22.6607	29.1644	4.8051	4.31727	19.8769	22.7262	24.8543	8.88859
Smp_020540	SC_0169	273436	298046	24.61		537	318	592	694	297	392	58	57	69	443													Smp_020540	0.744468	0.453862	0.867905	1.03174	2.69512	3.35586	0.731534	0.63818	1.18282	2.58119
Smp_020550	SC_0169	362566	392818	30.252		6514	8232	12322	5774	815	427	82	95	50	1056													Smp_020550	7.34645	9.55783	14.6957	6.98307	6.01639	2.97374	0.841352	0.865266	0.697267	5.00538
Smp_020590	SC_0080	520157	527139	6.982		3116	2814	3074	4054	377	499	349	427	264	539													Smp_020590	15.2265	14.1564	15.885	21.2436	12.0585	15.0574	15.5154	16.8511	15.9517	11.0697
Smp_020660	SC_0080	839291	839584	0.293		0	0	0	0	0	0	0	0	0	0													Smp_020660	0	0	0	0	0	0	0	0	0	0
Smp_020760	SC_0080	1171325	1181869	10.544		2868	2447	4195	4395	942	1328	263	256	175	1362													Smp_020760	9.2802	8.15148	14.3545	15.2503	19.9516	26.5352	7.74227	6.68983	7.00189	18.5225
Smp_020770	SC_0080	1155553	1156179	0.626		13691	10744	8376	8237	292	472	462	499	750	916													Smp_020770	746.181	602.837	482.753	481.414	104.17	158.854	229.079	219.637	505.44	209.821
Smp_020800	SC_0080	1053161	1067327	14.166		3335	3685	3382	1870	584	401	216	259	249	758													Smp_020800	8.03216	9.13689	8.61368	4.82968	9.20658	5.96385	4.73287	5.03771	7.41541	7.67271
Smp_020840	Chr_ZW	11317299	11317469	0.17		67	76	48	19	27	37	27	56	23	37													Smp_020840	13.4465	15.7026	10.1872	4.08911	35.4689	45.8545	49.2984	90.7652	57.0771	31.209
Smp_020880	Chr_ZW	11182851	11184348	1.497		0	0	0	0	0	0	0	0	0	0													Smp_020880	0	0	0	0	0	0	0	0	0	0
Smp_020920	Chr_ZW	11121564	11125483	3.919		8936	9892	7177	5758	1677	1436	485	634	490	2293													Smp_020920	77.795	88.6578	66.0739	53.7552	95.5631	77.1985	38.4136	44.5753	52.7477	83.8988
Smp_020960	Chr_ZW	10952788	10953420	0.632		0	2	6	0	0	0	0	0	0	0													Smp_020960	0	0.111153	0.342528	0	0	0	0	0	0	0
Smp_021040	Chr_2	30010365	30011151	0.786		3328	2527	4691	4432	453	520	364	349	303	1034													Smp_021040	144.459	112.925	215.33	206.301	128.709	139.383	143.746	122.344	162.631	188.636
Smp_021060	Chr_2	30003550	30004244	0.694		0	1	7	5	0	0	1	0	0	0													Smp_021060	0	0.0506114	0.363916	0.263593	0	0	0.447259	0	0	0
Smp_021070	Chr_2	29994160	29999540	5.38		1570	1802	1344	1223	108	83	138	162	181	185													Smp_021070	9.95637	11.7647	9.0132	8.31702	4.48306	3.25031	7.96187	8.29685	14.1932	4.93079
Smp_021080	Chr_2	29961820	29965240	3.42		3332	4016	3741	2854	306	293	196	231	189	513													Smp_021080	33.2401	41.2454	39.4661	30.5317	19.9815	18.0497	17.7889	18.6108	23.3141	21.5089
Smp_021100	Chr_2	29899975	29919979	20.004		1386	2017	2881	1702	320	331	165	192	144	510													Smp_021100	2.3639	3.54158	5.19623	3.11291	3.57245	3.48611	2.56027	2.64463	3.03689	3.65578
Smp_021130	Chr_2	29812140	29820289	8.149		1453	2051	1850	1092	317	378	255	291	335	508													Smp_021130	6.08338	8.84035	8.19086	4.90278	8.68735	9.77276	9.71301	9.83941	17.343	8.93895
Smp_021140	Chr_2	29800448	29801255	0.807		31053	20670	33403	42399	1363	1183	1880	2277	1668	2204													Smp_021140	1312.85	899.653	1493.39	1922.23	377.185	308.845	723.107	777.445	871.978	391.62
Smp_021160	Chr_2	29754430	29762966	8.536		1168	1103	1966	2648	295	360	159	177	188	512													Smp_021160	4.66844	4.53867	8.30981	11.3498	7.71792	8.88541	5.78177	5.71346	9.29151	8.60088
Smp_021170	Chr_2	29621069	29746652	125.583		1139	1335	3015	3162	855	934	391	552	470	1104													Smp_021170	0.30944	0.373386	0.866201	0.921202	1.52043	1.56692	0.966416	1.21112	1.57888	1.26057
Smp_021190	Chr_2	29602583	29608678	6.095		68	44	136	69	19	13	5	8	10	31													Smp_021190	0.380644	0.253564	0.805058	0.41419	0.696165	0.449365	0.254633	0.361657	0.692164	0.729315
Smp_021220	Chr_2	29506294	29510142	3.848		3149	2339	3217	2646	711	807	364	307	215	762													Smp_021220	27.9204	21.3503	30.1633	25.1581	41.2636	44.1843	29.3619	21.9828	23.5715	28.3953
Smp_021260	Chr_1	46357032	46370726	13.694		7	19	9	3	10	8	1	2	3	44													Smp_021260	0.0174402	0.0487339	0.0237123	0.00801521	0.163081	0.12308	0.0226667	0.040242	0.0924217	0.460733
Smp_021280	Chr_1	46291396	46292742	1.346		487	466	838	872	40	38	29	37	27	54													Smp_021280	12.3443	12.1604	22.4627	23.7026	6.63663	5.94796	6.68761	7.5742	8.46256	5.75275
Smp_021290	Chr_1	46243435	46253458	10.023		563	743	1267	1010	463	427	174	203	128	583													Smp_021290	1.91644	2.60375	4.5608	3.68678	10.3161	8.97552	5.38852	5.58057	5.3876	8.34061
Smp_021300	Chr_1	46199859	46240059	40.2		804	980	1750	1349	313	408	203	240	170	415													Smp_021300	0.68236	0.856265	1.57063	1.22775	1.7388	2.13828	1.56743	1.645	1.78405	1.4803
Smp_021320	Chr_1	46073330	46081204	7.874		460	264	592	728	59	57	36	44	45	92													Smp_021320	1.99318	1.17765	2.71262	3.38267	1.67336	1.52514	1.41914	1.5397	2.41102	1.6754
Smp_021330	Chr_1	46053657	46071597	17.94		1557	1978	3028	3156	263	226	181	243	208	428													Smp_021330	2.96108	3.87268	6.0897	6.43633	3.2739	2.65409	3.13166	3.73219	4.89129	3.42096
Smp_021340	Chr_3	15536249	15538817	2.568		10589	8437	18084	21798	2815	3591	1069	1256	961	4224													Smp_021340	140.684	115.399	254.075	310.56	244.803	294.612	129.211	134.764	157.874	235.861
Smp_021370	Chr_ZW	24369074	24379488	10.414		809	949	1061	1254	348	395	83	95	49	355													Smp_021370	2.65042	3.20079	3.67587	4.40559	7.46267	7.99115	2.47388	2.51354	1.985	4.88808
Smp_021390	Chr_ZW	24419085	24442048	22.963		24	52	110	89	148	194	7	6	6	239													Smp_021390	0.0356588	0.0795395	0.172833	0.141803	1.43935	1.77993	0.094621	0.0719951	0.110231	1.49244
Smp_021460	SC_0129	26907	38415	11.508		2	13	2	1	0	0	0	0	0	0													Smp_021460	0.00592944	0.0396782	0.00627036	0.00317924	0	0	0	0	0	0
Smp_021540	Chr_ZW	651732	661358	9.626		3936	4728	3780	3208	443	521	401	354	345	883													Smp_021540	13.9506	17.252	14.168	12.193	10.2776	11.4031	12.9305	10.133	15.1202	13.1535
Smp_021550	Chr_ZW	624274	633329	9.055		633	977	1342	960	129	159	80	64	42	231													Smp_021550	2.38506	3.78978	5.3472	3.87888	3.18151	3.69946	2.74233	1.94747	1.95679	3.65806
Smp_021590	Chr_ZW	588622	599092	10.47		1003	1539	1902	1074	29	48	86	150	85	62													Smp_021590	3.26842	5.16297	6.5543	3.75302	0.618563	0.965882	2.54959	3.94752	3.42496	0.849126
Smp_021600	Chr_ZW	570822	577935	7.113		1365	1816	1957	1427	191	228	50	55	21	300													Smp_021600	6.54732	8.96749	9.92659	7.33998	5.99671	6.75323	2.1819	2.13054	1.24552	6.04777
Smp_021730	SC_0129	98453	100976	2.523		30610	26189	14478	14548	2882	2488	1101	1336	525	3495													Smp_021730	413.933	364.594	207.04	210.965	255.099	207.76	135.453	145.905	87.7859	198.636
Smp_021750	Chr_2	2964412	2966195	1.783		3006	3205	4045	4031	388	461	464	532	284	607													Smp_021750	57.5203	63.1371	81.852	82.7152	48.5974	54.4727	80.7765	82.213	67.197	48.8163
Smp_021760	Chr_2	2975809	2976632	0.823		6042	4328	6872	7886	561	689	318	388	297	1124													Smp_021760	250.475	184.712	301.263	350.575	152.228	176.38	119.935	129.901	152.244	195.836
Smp_021790	Chr_2	3059580	3064401	4.821		610	468	957	1213	27	47	12	6	1	123													Smp_021790	4.31694	3.4097	7.16204	9.2055	1.25072	2.05395	0.772613	0.342921	0.0875076	3.65843
Smp_021800	Chr_2	3084474	3085541	1.067		1340	945	2056	1785	226	237	134	156	91	214													Smp_021800	42.8474	31.1082	69.5218	61.2065	47.3017	46.7965	38.9815	40.2847	35.9799	28.7592
Smp_021830	Chr_2	3138230	3156875	18.645		1187	974	1168	1322	133	122	98	100	47	138													Smp_021830	2.17206	1.83487	2.26018	2.59414	1.59302	1.37856	1.63148	1.47781	1.06345	1.06131
Smp_021870	Chr_2	3298250	3299605	1.355		2680	3431	4757	3438	950	1233	607	706	366	873													Smp_021870	67.4806	88.9384	126.665	92.8304	156.573	191.714	139.049	143.564	113.953	92.3851
Smp_021910	Chr_2	3419531	3424280	4.749		1976	1780	2542	2351	170	185	117	172	71	180													Smp_021910	14.1961	13.1651	19.3124	18.1123	7.99428	8.20728	7.64719	9.97945	6.30724	5.43497
Smp_021920	Chr_2	3431869	3465421	33.552		4448	6424	6193	1975	5208	5558	284	358	502	12784													Smp_021920	4.52304	6.72504	6.65955	2.15364	34.6645	34.9003	2.62735	2.93998	6.31202	54.6356
Smp_021950	Chr_2	3521945	3533369	11.424		1086	2611	1719	680	195	248	107	158	168	395													Smp_021950	3.24336	8.0278	5.429	2.17778	3.81197	4.57365	2.90726	3.81083	6.20403	4.95799
Smp_021960	Chr_2	3533266	3557613	24.347		374	536	924	1376	44	47	20	48	43	111													Smp_021960	0.524095	0.773263	1.36927	2.06774	0.403589	0.406707	0.254978	0.54322	0.745085	0.653739
Smp_021980	Chr_2	3575216	3591139	15.923		509	597	992	981	143	147	61	71	38	251													Smp_021980	1.09063	1.31691	2.24776	2.25407	2.0056	1.94501	1.18911	1.22861	1.0068	2.26035
Smp_022020	Chr_2	3754251	3767252	13.001		1792	2674	3490	2551	349	440	325	301	231	593													Smp_022020	4.70267	7.22425	9.68525	7.17889	5.99489	7.13026	7.75934	6.37926	7.4958	6.54041
Smp_022050	Chr_2	3830433	3836137	5.704		104	57	160	538	5	8	11	19	8	33													Smp_022050	0.622067	0.350997	1.01205	3.45085	0.19576	0.295488	0.598593	0.917813	0.591689	0.829586
Smp_022070	Chr_2	3891737	3897918	6.181		67	131	140	61	1	1	0	0	1	7													Smp_022070	0.369828	0.744424	0.817206	0.361073	0.0361305	0.0340856	0	0	0.0682534	0.162393
Smp_022090	Chr_2	3930109	3941401	11.292		6522	7400	4852	4381	816	686	481	614	416	850													Smp_022090	19.7058	23.0181	15.5029	14.1947	16.1381	12.7992	13.2219	14.9823	15.5419	10.7938
Smp_022100	SC_0111	124450	126764	2.314		1189	927	561	737	137	144	42	59	8	108													Smp_022100	17.5308	14.071	8.74705	11.6527	13.2218	13.1108	5.63383	7.02537	1.45851	6.69249
Smp_022110	SC_0111	130196	133493	3.297		4811	5669	2556	2211	394	405	165	242	162	559													Smp_022110	49.7852	60.3942	27.9707	24.5354	26.6876	25.8801	15.534	20.2244	20.729	24.312
Smp_022130	Chr_3.unplaced.SC_0174	61321	91109	29.788		691	1004	1092	841	255	313	153	215	132	313													Smp_022130	0.791444	1.18386	1.32265	1.03295	1.91175	2.21377	1.59429	1.98874	1.86946	1.50671
Smp_022140	Chr_3.unplaced.SC_0174	45205	55288	10.083		1260	1515	1619	1142	162	133	142	167	105	259													Smp_022140	4.26348	5.27753	5.79321	4.14381	3.58804	2.77902	4.37136	4.56359	4.39322	3.6833
Smp_022150	Chr_3.unplaced.SC_0174	14349	43520	29.171		985	831	2282	2675	214	321	106	140	94	455													Smp_022150	1.15204	1.00059	2.82245	3.35503	1.63831	2.31837	1.12791	1.32238	1.35944	2.23659
Smp_022170	SC_0254	99496	110126	10.63		2174	1799	3839	3215	535	536	281	380	259	842													Smp_022170	6.97766	5.94437	13.0301	11.0655	11.2397	10.6233	8.20524	9.84987	10.279	11.3581
Smp_022300	Chr_ZW	6362580	6369839	7.259		6	14	10	6	5	10	3	2	1	1													Smp_022300	0.0282006	0.0677422	0.0497033	0.0302411	0.153825	0.290237	0.128281	0.075916	0.0581174	0.0197538
Smp_022310	Chr_ZW	6331810	6358748	26.938		3492	4776	3619	3485	698	810	237	267	245	1148													Smp_022310	4.42275	6.2274	4.84714	4.73327	5.78659	6.33504	2.73087	2.73103	3.83693	6.11088
Smp_022320	Chr_ZW	6306232	6319980	13.748		3189	2594	2659	2573	341	278	212	257	87	254													Smp_022320	7.91405	6.62733	6.97816	6.84737	5.53921	4.26025	4.78646	5.15079	2.6697	2.64924
Smp_022330	Chr_ZW	6294522	6295622	1.1		20814	21072	9530	7865	2133	1950	539	719	475	2532													Smp_022330	645.575	672.854	312.581	261.595	433.043	373.484	152.095	180.101	182.173	330.064
Smp_022340	Chr_ZW	6274290	6276053	1.763		5299	5152	3650	1539	1717	1945	103	160	126	4341													Smp_022340	102.548	102.644	74.6969	31.9382	217.496	232.432	18.1344	25.0062	30.151	353.073
Smp_022400	Chr_ZW	5865868	5883310	17.442		9731	11843	7822	5207	5821	5243	1943	1628	750	6553													Smp_022400	19.0346	23.8492	16.1802	10.9223	74.5305	63.3305	34.5776	25.7181	18.1404	53.873
Smp_022410	Chr_ZW	5860119	5862156	2.037		102	102	112	128	37	44	4	2	0	19													Smp_022410	1.70841	1.7588	1.98376	2.29902	4.05642	4.55084	0.609519	0.270532	0	1.33749
Smp_022430	Chr_ZW	5844742	5845502	0.76		4716	3547	2384	2800	159	180	111	126	65	210													Smp_022430	211.711	163.929	113.176	134.793	46.7214	49.8986	45.3344	45.6812	36.0813	39.6217
Smp_022450	Chr_ZW	5760489	5771173	10.684		954	814	413	423	152	190	61	38	44	269													Smp_022450	3.04648	2.67608	1.39469	1.44854	3.17718	3.7467	1.77221	0.980009	1.73741	3.61032
Smp_022460	Chr_ZW	5731529	5733994	2.465		1980	1229	1337	1578	156	185	67	49	41	336													Smp_022460	27.4051	17.5123	19.5694	23.4215	14.1332	15.8119	8.43677	5.47721	7.01697	19.5456
Smp_022470	Chr_ZW	5711399	5726813	15.414		577	396	327	631	126	74	46	32	19	140													Smp_022470	1.27716	0.902377	0.765411	1.49774	1.82552	1.01145	0.926319	0.572025	0.520021	1.30239
Smp_022480	Chr_ZW	5708231	5709548	1.317		0	0	0	0	0	0	0	0	0	0													Smp_022480	0	0	0	0	0	0	0	0	0	0
Smp_022500	Chr_ZW	5640524	5646732	6.208		5360	5568	3293	2749	528	552	137	152	146	918													Smp_022500	29.4576	31.5033	19.1383	16.2012	18.9939	18.7334	6.84994	6.7464	9.92165	21.204
Smp_022520	Chr_ZW	5650082	5652470	2.388		0	2	0	0	0	0	0	0	0	0													Smp_022520	0	0.0294174	0	0	0	0	0	0	0	0
Smp_022540	Chr_ZW	5658010	5664655	6.645		2610	3177	1852	1523	519	658	157	149	127	815													Smp_022540	13.4008	16.7931	10.0556	8.38549	17.4423	20.8622	7.33369	6.17834	8.06291	17.5869
Smp_022560	Chr_2	5303753	5305503	1.75		39822	30440	12625	12129	1460	1151	1373	1553	865	1793													Smp_022560	776.37	610.963	260.289	253.577	186.315	138.569	243.529	244.52	208.526	146.916
Smp_022570	Chr_2	5318197	5319851	1.654		1669	1531	1467	1710	211	227	36	80	40	384													Smp_022570	34.4274	32.5123	32.0005	37.8255	28.4892	28.9148	6.75593	13.3271	10.2025	33.2907
Smp_022610	Chr_2	5419349	5422343	2.994		2	17	60	31	0	1	0	1	0	0													Smp_022610	0.0227909	0.199437	0.723039	0.378821	0	0.0703684	0	0.0920298	0	0
Smp_022630	Chr_2	5467986	5512131	44.145		1124	1806	1479	930	753	765	188	209	128	1231													Smp_022630	0.868697	1.43696	1.20878	0.770771	3.80931	3.65098	1.32189	1.3045	1.22324	3.99856
Smp_022640	Chr_1	2627149	2628953	1.804		45467	37865	25716	20900	1322	1161	1976	2412	2548	2599													Smp_022640	859.891	737.241	514.315	423.871	163.654	135.589	339.992	368.401	595.862	206.584
Smp_022660	Chr_2	5513671	5528546	14.875		3656	3769	2792	3532	642	641	318	359	242	797													Smp_022660	8.38557	8.89974	6.77206	8.68735	9.63853	9.07884	6.63572	6.64994	6.86343	7.68296
Smp_022700	SC_0390	19235	21392	2.157		2097	1662	1317	2067	349	449	224	246	106	536													Smp_022700	33.169	27.0638	22.0292	35.0602	36.1333	43.8557	32.2341	31.4243	20.7319	35.6321
Smp_022710	Chr_ZW	9493212	9493374	0.162		0	0	0	3	0	1	0	0	0	0													Smp_022710	0	0	0	0.677532	0	1.30051	0	0	0	0
Smp_022720	SC_0390	6513	7736	1.223		0	1	2	2	0	1	0	0	0	1													Smp_022720	0	0.0287198	0.0590019	0.0598311	0	0.172267	0	0	0	0.117247
Smp_022730	Chr_2	5641631	5642160	0.529		5152	3935	1732	2465	518	363	228	310	102	499													Smp_022730	332.28	261.275	118.128	170.485	218.679	144.571	133.782	161.468	81.3444	135.261
Smp_022740	Chr_2	5645882	5646589	0.707		144	104	108	150	3	1	1	0	1	4													Smp_022740	6.94907	5.1668	5.51146	7.76239	0.94762	0.297996	0.439035	0	0.59671	0.811274
Smp_022760	Chr_ZW	9449953	9455150	5.197		35	47	38	40	36	43	4	0	2	59													Smp_022760	0.229773	0.317653	0.263811	0.281599	1.54697	1.74319	0.238905	0	0.162353	1.62789
Smp_022810	Chr_ZW	9273765	9286949	13.184		1589	1461	1154	1084	1067	1072	147	196	168	1068													Smp_022810	4.11207	3.89234	3.15806	3.00819	18.0738	17.1308	3.46089	4.09628	5.37582	11.6159
Smp_022850	Chr_ZW	9144904	9149663	4.759		6964	5625	3634	4152	368	373	147	199	136	804													Smp_022850	49.926	41.5159	27.5506	31.9202	17.2689	16.5129	9.58782	11.5217	12.0561	24.2252
Smp_022870	Chr_ZW	9118194	9122524	4.33		24	17	19	20	13	8	2	0	1	23													Smp_022870	0.189107	0.137902	0.158317	0.168992	0.670483	0.389253	0.143371	0	0.0974305	0.76167
Smp_022890	Chr_ZW	9067740	9084638	16.898		451	388	510	409	425	537	34	48	51	856													Smp_022890	0.910594	0.8065	1.08892	0.885547	5.61676	6.69528	0.624542	0.782683	1.27326	7.26383
Smp_022960	Chr_7	7593433	7615053	21.62		3138	3377	3632	3065	375	408	313	365	226	518													Smp_022960	4.952	5.48635	6.06111	5.18679	3.87354	3.97589	4.49373	4.65176	4.40997	3.43559
Smp_022990	Chr_7	7306074	7309982	3.908		2937	2919	3598	3160	392	454	172	239	208	782													Smp_022990	25.6409	26.2354	33.2176	29.584	22.4008	24.4755	13.6613	16.8509	22.4539	28.6932
Smp_023010	Chr_7	7208350	7210650	2.3		509	328	617	706	257	337	56	68	25	226													Smp_023010	7.55046	5.00903	9.67876	11.2305	24.9539	30.8696	7.5575	8.14632	4.58559	14.0899
Smp_023140	Chr_2	17070213	17072944	2.731		96	58	149	210	687	748	1210	1112	1227	1334													Smp_023140	1.19931	0.745958	1.96846	2.81333	56.1782	57.7045	137.525	112.192	189.542	70.0424
Smp_023150	Chr_2	17052437	17065775	13.338		4457	4131	4568	4163	386	356	370	461	244	588													Smp_023150	11.4008	10.8786	12.3566	11.4193	6.46293	5.62327	8.61052	9.52337	7.7176	6.32141
Smp_023160	Chr_2	17047103	17047518	0.415		6548	4395	4904	4989	1317	1075	714	670	233	629													Smp_023160	538.325	371.979	426.348	439.834	708.713	545.745	534.033	444.843	236.859	217.335
Smp_023170	Chr_2	17043396	17046962	3.566		3094	2765	2702	3462	113	105	134	105	146	172													Smp_023170	29.6021	27.2346	27.338	35.5197	7.07668	6.20351	11.6638	8.11313	17.2725	6.91631
Smp_023190	Chr_2	17024823	17025449	0.626		0	0	0	0	0	0	0	0	0	0													Smp_023190	0	0	0	0	0	0	0	0	0	0
Smp_023230	Chr_2	16951762	16965684	13.922		1963	2110	2321	1743	232	277	239	289	170	404													Smp_023230	4.81063	5.3234	6.015	4.58057	3.72151	4.19187	5.32862	5.71974	5.15146	4.16109
Smp_023240	Chr_2	16941470	16950447	8.977		975	884	997	659	7	24	4	3	4	16													Smp_023240	3.70559	3.45883	4.00706	2.68583	0.17414	0.563261	0.138308	0.0920811	0.18798	0.255574
Smp_023250	Chr_2	16925881	16934510	8.629		2069	2472	1968	1961	595	495	318	338	250	863													Smp_023250	8.18057	10.0623	8.22862	8.31459	15.3989	12.0858	11.4389	10.7929	12.2226	14.3409
Smp_023270	Chr_2	16858493	16868493	10		1560	1821	2197	3267	437	473	241	253	198	686													Smp_023270	5.32241	6.39614	7.9267	11.9529	9.7592	9.96531	7.48058	6.97109	8.35311	9.83674
Smp_023290	Chr_3	22828839	22847682	18.843		27	28	19	31	3	9	1	1	5	17													Smp_023290	0.0488874	0.0521934	0.0363803	0.0601915	0.0355553	0.100629	0.0164728	0.0146228	0.111945	0.129368
Smp_023360	Chr_3	22661962	22676313	14.351		17482	15380	12136	11408	1320	1045	1141	1356	651	1476													Smp_023360	41.5616	37.6428	30.5109	29.0838	20.5411	15.3414	24.6787	26.035	19.1373	14.7479
Smp_023470	Chr_3	21192064	21193724	1.66		114	46	65	50	1	21	2	5	0	3													Smp_023470	2.34304	0.973325	1.41276	1.10201	0.134532	2.66527	0.373973	0.829931	0	0.259143
Smp_023530	Chr_3	21362100	21365084	2.984		8979	10169	7922	7206	946	1023	850	1156	922	1760													Smp_023530	102.663	119.698	95.7852	88.3526	70.7986	72.2281	88.4175	106.743	130.351	84.5748
Smp_023550	Chr_3	21389270	21401313	12.043		9086	11485	12432	8669	2356	2483	572	706	456	2969													Smp_023550	25.7408	33.4969	37.245	26.3365	43.6891	43.4382	14.7428	16.1529	15.974	35.3511
Smp_023570	Chr_3	21433323	21434135	0.812		36	31	46	7	16	17	14	14	11	13													Smp_023570	1.51262	1.34095	2.04392	0.315403	4.40044	4.41085	5.35168	4.75064	5.71504	2.2957
Smp_023620	Chr_3	21578051	21608950	30.899		1273	1538	2560	2602	161	193	60	61	53	326													Smp_023620	1.40562	1.74832	2.98922	3.08096	1.16363	1.31596	0.602733	0.543958	0.723626	1.51287
Smp_023660	Chr_3	21667604	21672117	4.513		2500	2502	3160	2936	431	482	248	372	279	648													Smp_023660	18.8998	19.4729	25.2629	23.8021	21.3277	22.5015	17.0571	22.7121	26.0809	20.5891
Smp_023670	Chr_3	21672299	21674717	2.418		1929	1881	3120	2825	388	399	154	249	141	564													Smp_023670	27.2182	27.3238	46.5544	42.7451	35.8351	34.7653	19.7689	28.3742	24.6006	33.4464
Smp_023700	Chr_3	21707565	21708318	0.753		4042	4039	2428	2306	403	462	253	242	200	431													Smp_023700	183.141	188.403	116.336	112.044	119.521	129.264	104.29	88.5525	112.052	82.0747
Smp_023710	Chr_3	21772171	21773439	1.268		2	0	12	1	0	1	0	0	0	1													Smp_023710	0.0538139	0	0.341448	0.0288539	0	0.166154	0	0	0	0.113086
Smp_023830	Chr_2	24888848	24902866	14.018		558	487	753	637	48	69	27	34	17	163													Smp_023830	1.3581	1.22026	1.93808	1.66256	0.764694	1.03703	0.597855	0.668303	0.511618	1.66736
Smp_023840	Chr_2	24886481	24888836	2.355		2014	1166	1732	1942	202	327	665	545	375	305													Smp_023840	29.1778	17.3906	26.535	30.1705	19.1555	29.2541	87.6494	63.7655	67.1774	18.571
Smp_023860	Chr_2	24831477	24842400	10.923		2	27	123	74	68	78	21	35	22	18													Smp_023860	0.006247	0.086822	0.40628	0.247864	1.39027	1.50447	0.596754	0.88289	0.849696	0.236297
Smp_023930	Chr_2	24494793	24497128	2.335		620	652	1219	1149	230	229	77	108	66	417													Smp_023930	9.05917	9.80773	18.8356	18.0035	21.9975	20.6623	10.2358	12.7443	11.9245	25.608
Smp_023940	Chr_2	24434585	24481966	47.381		559	528	1088	1034	290	346	111	173	198	876													Smp_023940	0.402523	0.391415	0.828489	0.798436	1.36687	1.53851	0.727172	1.00606	1.76297	2.65111
Smp_023990	Chr_ZW	39002650	39010693	8.043		1676	1960	2185	2074	162	164	175	167	187	274													Smp_023990	7.10951	8.55945	9.80157	9.4344	4.4981	4.29591	6.75364	5.72109	9.80859	4.88494
Smp_024000	Chr_ZW	39015250	39055254	40.004		1500	1853	2310	2322	277	308	217	238	195	395													Smp_024000	1.2793	1.62697	2.08339	2.12365	1.54635	1.6221	1.68374	1.63928	2.05643	1.41586
Smp_024010	Chr_ZW	39062031	39062739	0.708		732	731	870	753	0	1	0	4	0	1													Smp_024010	35.2745	36.2654	44.3352	38.9122	0	0.297575	0	1.55671	0	0.202532
Smp_024030	Chr_ZW	39145090	39149124	4.034		1501	1169	1212	1408	176	235	127	163	119	285													Smp_024030	12.6949	10.1786	10.84	12.77	9.74337	12.2733	9.77206	11.1335	12.445	10.1306
Smp_024060	Chr_ZW	39185751	39187727	1.976		4812	4089	4979	5550	273	356	129	139	131	481													Smp_024060	83.0849	72.6839	90.9112	102.761	30.8538	37.9571	20.2638	19.3824	27.9684	34.9048
Smp_024070	Chr_ZW	39195729	39240223	44.494		9	33	31	13	3	31	3	2	3	6													Smp_024070	0.0069012	0.0260508	0.0251375	0.0106897	0.0150575	0.146788	0.0209285	0.0123854	0.0284448	0.0193365
Smp_024110	Chr_ZW	39428503	39434676	6.173		82245	84286	52143	42586	11934	12346	5709	5375	3380	14097													Smp_024110	454.566	479.587	304.763	252.403	431.74	421.366	287.066	239.918	230.995	327.459
Smp_024120	Chr_ZW	39434794	39435186	0.392		22757	14468	14160	17863	1946	1971	1063	1060	423	1530													Smp_024120	1980.67	1296.37	1303.28	1667.22	1108.64	1059.33	841.716	745.075	455.237	559.671
Smp_024140	Chr_ZW	39477708	39491018	13.31		84983	95736	77677	57544	7337	6903	6004	7118	6760	12158													Smp_024140	217.84	252.642	210.56	158.178	123.104	109.267	140.017	147.353	214.265	130.982
Smp_024150	Chr_ZW	39508106	39525195	17.089		3810	4167	5106	4014	1352	1384	685	737	508	1754													Smp_024150	7.60662	8.56475	10.7802	8.59378	17.6682	17.0627	12.4421	11.8831	12.5409	14.7177
Smp_024180	Chr_ZW	39632694	39638835	6.141		4041	4121	3473	3031	1021	1200	483	343	221	1368													Smp_024180	22.4509	23.5706	20.4046	18.058	37.1295	41.1691	24.4133	15.3899	15.1822	31.9429
Smp_024190	Chr_ZW	39662182	39691781	29.599		879	1131	3241	2863	326	324	144	190	245	790													Smp_024190	1.0132	1.34213	3.95061	3.5389	2.45965	2.3062	1.51009	1.76871	3.49198	3.82716
Smp_024220	Chr_ZW	39852423	39856031	3.608		1188	1828	2297	1042	298	255	181	219	141	344													Smp_024220	11.234	17.7958	22.9698	10.5663	18.4452	14.8903	15.5715	16.7247	16.4868	13.6716
Smp_024240	Chr_ZW	39910809	39917794	6.985		936	805	1745	2875	163	141	102	96	43	163													Smp_024240	4.57186	4.04797	9.01345	15.059	5.21139	4.25287	4.53265	3.78691	2.59708	3.34617
Smp_024290	Chr_ZW	40139333	40145317	5.984		26	29	193	133	13	11	5	5	14	46													Smp_024290	0.14824	0.170221	1.16366	0.813175	0.485159	0.387285	0.259356	0.230228	0.987005	1.10228
Smp_024360	Chr_ZW	40432537	40438456	5.919		3652	3615	3415	3597	387	373	403	397	233	472													Smp_024360	21.0507	21.452	20.8163	22.2339	14.6014	13.2767	21.1337	18.4809	16.607	11.4346
Smp_024370	Chr_ZW	40445199	40458535	13.336		4470	5795	6832	4608	1342	1349	247	312	276	2019													Smp_024370	11.4358	15.2629	18.4835	12.6418	22.4729	21.3116	5.74896	6.44628	8.73105	21.7089
Smp_024380	Chr_ZW	40488998	40495974	6.976		3920	4137	3137	2734	165	145	215	236	201	248													Smp_024380	19.1718	20.8299	16.2245	14.3389	5.28214	4.37916	9.56644	9.3215	12.1555	5.09768
Smp_024390	Chr_ZW	40498046	40498729	0.683		6834	5898	4410	5093	270	241	651	623	323	423													Smp_024390	341.38	303.314	232.959	272.82	88.2827	74.3406	295.855	251.332	199.51	88.8069
Smp_024450	Chr_ZW	40648556	40669298	20.742		177	342	439	177	275	295	79	71	45	413													Smp_024450	0.291143	0.57914	0.763618	0.31221	2.96084	2.99641	1.18221	0.943166	0.915261	2.85513
Smp_024490	Chr_1	18681303	18689010	7.707		831	989	1400	1583	420	476	431	364	237	439													Smp_024490	3.67874	4.50733	6.55398	7.51483	12.1702	13.0122	17.3584	13.0136	12.9732	8.16782
Smp_024500	Chr_1	18652484	18664809	12.325		3026	3195	2589	2691	674	780	455	478	276	963													Smp_024500	8.37656	9.10525	7.57892	7.98823	12.2125	13.3333	11.4589	10.6861	9.44724	11.2038
Smp_024520	Chr_2	14818725	14822893	4.168		3159	3462	5664	4112	908	995	345	444	322	1203													Smp_024520	25.8586	29.1748	49.0295	36.0952	48.6509	50.295	25.6927	29.3519	32.592	41.3871
Smp_024580	Chr_4	10739471	10756843	17.372		4174	5066	4175	4388	415	530	440	437	342	881													Smp_024580	8.19759	10.2429	8.67099	9.24146	5.33496	6.4277	7.86178	6.93125	8.30537	7.27199
Smp_024590	Chr_4	10762942	10763610	0.668		8436	6062	8021	8852	526	604	483	549	313	689													Smp_024590	430.867	318.748	433.226	484.829	175.85	190.498	224.434	226.452	197.675	147.901
Smp_024650	Chr_4	11002265	11003492	1.227		5	4	10	13	0	8	6	0	0	3													Smp_024650	0.13903	0.114505	0.294048	0.387635	0	1.37365	1.51784	0	0	0.350593
Smp_024660	Chr_4	11086259	11112044	25.785		1314	2208	5101	3490	173	220	27	55	39	460													Smp_024660	1.73865	3.00774	7.13757	4.95202	1.49834	1.79757	0.325024	0.587727	0.638088	2.5581
Smp_024670	Chr_4	11128006	11133860	5.854		900	1110	1240	1454	122	138	89	60	91	200													Smp_024670	5.24534	6.66006	7.64242	9.08731	4.65414	4.96656	4.71906	2.82409	6.558	4.89897
Smp_024780	Chr_4	11718884	11746176	27.292		4028	4446	6776	8508	1241	1289	524	650	595	2258													Smp_024780	5.03544	5.72192	8.95778	11.4055	10.1547	9.95055	5.95956	6.56233	9.19739	11.8636
Smp_024800	Chr_4	11871332	11872720	1.388		376	312	456	715	27	39	58	38	31	40													Smp_024800	9.24234	7.89538	11.8533	18.8469	4.34417	5.91977	12.9705	7.54353	9.42226	4.13235
Smp_024810	SC_0315	1404	2165	0.761		821	398	890	1598	136	146	30	54	33	100													Smp_024810	36.808	18.3699	42.1956	76.8273	39.9105	40.4201	12.2364	19.5519	18.2941	18.8427
Smp_024820	SC_0315	14385	45593	31.208		4983	4375	6491	3777	1264	1345	153	248	184	2178													Smp_024820	5.44764	4.92402	7.50426	4.42797	9.04511	9.08	1.52175	2.18961	2.48734	10.0073
Smp_024850	Chr_6	11201303	11202059	0.756		27459	20398	24686	25014	1353	1194	1962	2488	1619	2002													Smp_024850	1239.21	947.706	1178.12	1210.56	399.676	332.745	805.555	906.794	903.458	379.725
Smp_024860	Chr_6	11182182	11190355	8.173		90	97	180	119	36	36	1	4	6	57													Smp_024860	0.375703	0.416868	0.794609	0.532708	0.983679	0.928005	0.0379784	0.134852	0.309708	1.00005
Smp_024870	Chr_6	11123082	11142808	19.726		758	622	1169	1178	1478	1692	171	212	233	2782													Smp_024870	1.31103	1.10754	2.13815	2.18489	16.7328	18.0714	2.69076	2.96126	4.9831	20.223
Smp_024880	Chr_6	11102021	11116633	14.612		8966	7239	8654	7149	1693	1577	1242	1486	645	1751													Smp_024880	20.935	17.4011	21.3683	17.9003	25.875	22.738	26.3834	28.0214	18.6223	17.1832
Smp_024900	Chr_6	11076506	11091360	14.854		2307	3715	4758	3038	359	462	377	404	384	673													Smp_024900	5.29893	8.78463	11.5569	7.48287	5.39739	6.55282	7.878	7.49408	10.9061	6.49679
Smp_024930	Chr_6	10993000	10999190	6.19		1067	1187	2206	2035	107	112	38	52	40	138													Smp_024930	5.88108	6.73547	12.8581	12.0281	3.86034	3.81204	1.90551	2.31469	2.72617	3.1968
Smp_024970	Chr_6	10850752	10859037	8.285		1673	2583	4210	3292	306	379	364	473	374	565													Smp_024970	6.88949	10.9506	18.3338	14.5375	8.24824	9.63776	13.6373	15.7307	19.0442	9.77874
Smp_025010	Chr_6	10765021	10773916	8.895		10723	10410	9584	8033	1111	1215	814	945	553	1540													Smp_025010	41.1295	41.1067	38.8743	33.0412	27.8934	28.778	28.4051	29.2729	26.2278	24.8257
Smp_025020	Chr_6	10729517	10745579	16.062		2046	1488	2776	3273	294	322	149	149	191	558													Smp_025020	4.346	3.25395	6.23565	7.45539	4.08771	4.22363	2.87942	2.55604	5.01668	4.98152
Smp_025030	Chr_6	10702438	10725592	23.154		73	155	416	314	591	605	88	125	110	1375													Smp_025030	0.107567	0.235133	0.648231	0.496166	5.70025	5.50502	1.17971	1.48752	2.00424	8.51537
Smp_025100	Chr_ZW	36513174	36522795	9.621		3671	3600	3514	3738	308	319	253	284	193	412													Smp_025100	13.0181	13.1429	13.1778	14.2149	7.14929	6.98554	8.16241	8.13352	8.46292	6.1405
Smp_025130	Chr_ZW	36473758	36477008	3.25		3272	4620	2983	944	230	271	295	355	290	433													Smp_025130	34.349	49.9306	33.1156	10.627	15.8044	17.5677	28.1745	30.0971	37.6442	19.1043
Smp_025150	Chr_ZW	36420314	36429431	9.117		5287	5943	4742	4365	285	284	233	216	200	374													Smp_025150	19.7852	22.8961	18.766	17.5168	6.98113	6.5629	7.93272	6.52803	9.25467	5.88229
Smp_025160	Chr_ZW	36379193	36390303	11.11		5623	5133	6786	7117	598	730	474	571	353	914													Smp_025160	17.2678	16.228	22.0375	23.4372	12.0204	13.8433	13.2429	14.1613	13.4043	11.7967
Smp_025180	Chr_ZW	36322437	36322805	0.368		0	0	0	0	0	0	0	0	0	0													Smp_025180	0	0	0	0	0	0	0	0	0	0
Smp_025260	Chr_ZW	36072594	36079562	6.968		1451	1414	1536	2137	204	157	185	246	96	177													Smp_025260	7.10465	7.1277	7.95326	11.2207	6.53815	4.74702	8.24103	9.72763	5.81227	3.64244
Smp_025340	Chr_ZW	35899494	35903614	4.12		2115	2031	2810	2455	244	373	176	226	155	436													Smp_025340	17.5145	17.3149	24.6077	21.8011	13.2259	19.074	13.2597	15.1144	15.8715	15.1746
Smp_025360	Chr_ZW	35844364	35864097	19.733		1786	1728	3402	3886	408	444	87	124	94	631													Smp_025360	3.08796	3.0758	6.22019	7.20499	4.61742	4.74045	1.3685	1.73145	2.00964	4.58525
Smp_025370	Chr_ZW	35796684	35808823	12.139		4713	3361	4784	7361	734	1005	125	108	112	1426													Smp_025370	13.2464	9.72509	14.219	22.1859	13.5035	17.4427	3.19628	2.45144	3.89241	16.8447
Smp_025380	Chr_ZW	35770949	35779865	8.916		551	216	375	755	946	2135	102	121	113	1253													Smp_025380	2.10846	0.850926	1.51748	3.09814	23.6948	50.4496	3.55098	3.73935	5.34677	20.1515
Smp_025390	Chr_ZW	35748808	35751996	3.188		1	1	4	11	17	23	0	2	0	27													Smp_025390	0.010702	0.0110177	0.0452693	0.12624	1.19087	1.51998	0	0.172859	0	1.21443
Smp_025410	Chr_ZW	35724966	35729664	4.698		653	403	808	769	132	270	14	40	19	160													Smp_025410	4.74224	3.01301	6.20527	5.98876	6.27471	12.1082	0.924982	2.346	1.70617	4.88353
Smp_025440	Chr_ZW	35680085	35695804	15.719		1563	1603	2753	3671	399	452	233	255	198	657													Smp_025440	3.39248	3.58193	6.31893	8.54443	5.66866	6.05819	4.60097	4.46988	5.31402	5.99332
Smp_025510	Chr_ZW	35454452	35469001	14.549		8558	9711	10314	8763	2349	2521	1161	1288	876	2326													Smp_025510	20.0689	23.4444	25.5774	22.0365	36.0564	36.5064	24.7695	24.3929	25.4012	22.9247
Smp_025550	Chr_ZW	35399270	35407769	8.499		2860	3929	4153	4788	330	369	250	360	201	526													Smp_025550	11.4811	16.2376	17.6302	20.6115	8.67119	9.1472	9.13041	11.6712	9.97726	8.87452
Smp_025560	Chr_ZW	35351427	35353961	2.534		3860	4502	3393	1710	356	395	224	205	199	983													Smp_025560	51.9714	62.4032	48.3103	24.6896	31.3744	32.8413	27.4384	22.2909	33.1306	55.6255
Smp_025570	Chr_ZW	35341324	35348694	7.37		2759	2371	3608	4009	535	664	270	326	250	1083													Smp_025570	12.7723	11.2998	17.6629	19.9018	16.2113	18.9815	11.3714	12.1879	14.3105	21.0711
Smp_025620	Chr_1	29218209	29228511	10.302		121	115	253	312	89	93	21	27	16	246													Smp_025620	0.400726	0.392089	0.886056	1.10804	1.92931	1.90191	0.632726	0.722142	0.655211	3.42405
Smp_025670	Chr_1	29107468	29111085	3.617		784	850	1581	1776	193	206	64	94	65	249													Smp_025670	7.39522	8.25426	15.7705	17.9646	11.9163	11.9991	5.49224	7.16077	7.58137	9.87138
Smp_025680	Chr_1	29106744	29107406	0.662		2865	2377	2492	2312	185	222	133	161	114	333													Smp_025680	147.656	126.119	135.816	127.777	62.4089	70.652	62.3608	67.0113	72.649	72.1296
Smp_025690	Chr_1	29095379	29102074	6.695		163	221	259	104	16	13	26	14	11	14													Smp_025690	0.830655	1.15944	1.39576	0.568338	0.533706	0.409093	1.20543	0.576179	0.693147	0.29985
Smp_025700	Chr_1	29074928	29094165	19.237		324	354	539	482	31	27	18	9	13	24													Smp_025700	0.574634	0.646359	1.01091	0.916713	0.359879	0.295703	0.290438	0.12891	0.285095	0.178896
Smp_025740	Chr_1	28940055	28948180	8.125		1715	1794	2710	2474	680	738	88	121	77	880													Smp_025740	7.20152	7.75545	12.0339	11.1404	18.6904	19.1365	3.36184	4.10338	3.99807	15.5305
Smp_025750	Chr_1	28928423	28929828	1.405		1492	1688	1897	1932	323	384	127	196	175	595													Smp_025750	36.2306	42.1992	48.7139	50.31	51.3403	57.5817	28.0573	38.4379	52.5466	60.725
Smp_025800	Chr_1	28864112	28865585	1.473		9545	7285	5891	6192	923	960	670	899	362	833													Smp_025800	221.084	173.714	144.294	153.798	139.937	137.309	141.186	168.166	103.679	81.0904
Smp_025830	Chr_1	28803588	28808880	5.292		152	153	256	264	557	421	306	335	121	520													Smp_025830	0.979958	1.0155	1.74535	1.82519	23.5054	16.7607	17.9482	17.4424	9.64603	14.09
Smp_025860	Chr_1	28700673	28702090	1.417		27818	18743	34933	40340	3511	4773	591	734	691	9185													Smp_025860	669.792	464.598	889.464	1041.57	553.342	709.661	129.46	142.727	205.727	929.472
Smp_025890	Chr_1	28661693	28664005	2.312		21	46	121	93	64	112	69	69	32	131													Smp_025890	0.309895	0.69884	1.88825	1.4717	6.18194	10.2061	9.26359	8.22321	5.83909	8.12476
Smp_025950	Chr_1	28521922	28522896	0.974		3080	3206	2569	1902	184	228	212	224	183	358													Smp_025950	107.889	115.615	95.1628	71.4456	42.1882	49.318	67.5608	63.3679	79.2638	52.7049
Smp_026030	Chr_4.unplaced.SC_0032	521539	542125	20.586		219	238	371	428	8	8	27	28	16	12													Smp_026030	0.362957	0.406081	0.650226	0.760669	0.0867862	0.0818743	0.407108	0.374771	0.327892	0.0835865
Smp_026040	Chr_5	85378	118199	32.821		243	406	632	380	160	162	117	158	81	197													Smp_026040	0.252603	0.434492	0.694748	0.4236	1.08868	1.0399	1.1065	1.32643	1.04116	0.86068
Smp_026090	Chr_5	216856	229424	12.568		1143	1114	1432	1139	184	202	85	121	85	293													Smp_026090	3.10287	3.11334	4.11092	3.31575	3.26952	3.38622	2.09928	2.65277	2.85322	3.34294
Smp_026100	Chr_5	214119	214686	0.567		161	57	59	90	60	76	154	98	85	152													Smp_026100	9.68783	3.53102	3.75432	5.80742	23.632	28.2397	84.3055	47.6237	63.2439	38.4404
Smp_026160	Chr_5	366284	386056	19.772		25285	28748	19745	11710	1820	1372	877	1217	855	2893													Smp_026160	43.6311	51.0699	36.0304	21.6686	20.5567	14.6195	13.7679	16.9598	18.2431	20.9809
Smp_026190	Chr_5	454203	458756	4.553		4680	4039	5491	5863	241	404	339	328	376	707													Smp_026190	35.0697	31.159	43.5127	47.1136	11.8209	18.6945	23.1111	19.8498	34.8396	22.2663
Smp_026200	Chr_5	459869	479717	19.848		9	1	6	0	0	0	0	0	0	0													Smp_026200	0.0154707	0.00176967	0.0109068	0	0	0	0	0	0	0
Smp_026230	Chr_3	13703169	13710997	7.828		1668	1658	4436	2195	374	465	89	80	81	736													Smp_026230	7.26991	7.43946	20.4457	10.2591	10.6697	12.515	3.52905	2.81591	4.36533	13.482
Smp_026250	Chr_3	13611505	13632291	20.786		2837	3627	5087	5563	438	498	296	278	258	659													Smp_026250	4.65663	6.12893	8.82984	9.79178	4.70583	5.04764	4.42017	3.68514	5.23639	4.54613
Smp_026260	Chr_3	13607248	13610090	2.842		2504	2447	3493	2960	730	669	468	555	336	861													Smp_026260	30.0603	30.2425	44.3442	38.1058	57.3629	49.5943	51.114	53.8083	49.8767	43.4416
Smp_026270	Chr_3	13587487	13600106	12.619		2368	2770	2684	1307	410	512	156	148	220	980													Smp_026270	6.40236	7.71015	7.67396	3.78943	7.2559	8.5482	3.83723	3.2316	7.35497	11.136
Smp_026280	Chr_3	13580881	13586960	6.079		1232	1012	1786	2180	373	427	131	123	115	539													Smp_026280	6.91452	5.84731	10.6001	13.1204	13.7028	14.7988	6.68894	5.57511	7.98084	12.714
Smp_026300	Chr_3	13521497	13532097	10.6		3230	2953	3411	3817	374	396	256	321	297	811													Smp_026300	10.3963	9.78511	11.6102	13.1747	7.87949	7.8708	7.49639	8.3441	11.8204	10.9709
Smp_026310	Chr_3	13500267	13503587	3.32		3192	4135	2538	3133	549	480	431	538	408	578													Smp_026310	32.8026	43.7467	27.5814	34.526	36.9289	30.4602	40.2956	44.6503	51.8448	24.9642
Smp_026320	Chr_3	13442592	13478011	35.419		789	1296	2446	1929	318	354	299	379	319	604													Smp_026320	0.760019	1.28522	2.49162	1.9926	2.00504	2.1057	2.62031	2.94838	3.7996	2.44528
Smp_026340	Chr_3	13401203	13401503	0.3		2992	1807	2941	3214	189	226	101	148	99	254													Smp_026340	340.27	211.566	353.701	391.966	140.693	158.715	104.5	135.932	139.218	121.406
Smp_026390	Chr_3	13247112	13254121	7.009		506	540	682	968	95	90	71	53	62	163													Smp_026390	2.46308	2.70611	3.51067	5.05293	3.02691	2.7053	3.14427	2.08353	3.7318	3.33471
Smp_026400	Chr_ZW	55300367	55301333	0.966		283	478	401	172	2	4	84	104	110	3													Smp_026400	9.99523	17.3804	14.9772	6.51441	0.462366	0.872393	26.9911	29.6645	48.0395	0.445319
Smp_026420	Chr_ZW	55206231	55214903	8.672		1674	1332	2003	2117	425	454	207	223	155	462													Smp_026420	6.58597	5.39502	8.33343	8.93152	10.9447	11.0298	7.40916	7.08542	7.54042	7.63923
Smp_026440	Chr_ZW	55350777	55351084	0.307		135	71	218	280	43	57	15	3	6	82													Smp_026440	15.003	8.12321	25.6201	33.369	31.2797	39.117	15.166	2.69255	8.2451	38.3003
Smp_026450	Chr_ZW	55339688	55448227	108.539		878	922	749	983	121	111	87	129	45	167													Smp_026450	0.275989	0.298369	0.248976	0.331353	0.248961	0.21546	0.248801	0.32748	0.174908	0.220627
Smp_026460	Chr_ZW	55323303	55330586	7.283		1771	2218	1407	1065	281	279	154	235	210	457													Smp_026460	8.29644	10.6969	6.97021	5.35011	8.61645	8.07093	6.5634	8.89074	12.1644	8.99773
Smp_026510	Chr_ZW	55003319	55025749	22.43		917	1329	1246	557	211	194	130	108	92	363													Smp_026510	1.39484	2.08115	2.00425	0.908552	2.10081	1.82222	1.799	1.32671	1.73038	2.32062
Smp_026540	Chr_ZW	54783550	54841226	57.676		1377	2270	2224	834	632	677	200	306	133	662													Smp_026540	0.814559	1.38242	1.39124	0.529047	2.44712	2.47299	1.07635	1.46186	0.972836	1.64585
Smp_026560	Chr_ZW	54713078	54717704	4.626		23401	23100	18432	15465	7765	8037	2480	2654	1094	8187													Smp_026560	172.589	175.394	143.757	122.312	374.859	366.031	166.404	158.079	99.7688	253.773
Smp_026570	Chr_ZW	54602578	54618079	15.501		154	138	341	242	139	93	71	94	47	186													Smp_026570	0.338957	0.3127	0.793701	0.571188	2.00257	1.26402	1.42173	1.67089	1.27915	1.7206
Smp_026630	SC_0013	390963	393953	2.99		10189	9294	9928	8819	603	716	365	488	257	788													Smp_026630	116.264	109.179	119.799	107.913	45.038	50.4512	37.8913	44.9706	36.2614	37.7905
Smp_026670	SC_0013	158984	206502	47.518		594	369	1252	1367	48	21	8	19	14	27													Smp_026670	0.426493	0.272757	0.950623	1.05253	0.225588	0.0931088	0.0522577	0.110173	0.124295	0.0814766
Smp_026700	SC_0013	70146	99866	29.72		481	426	587	672	74	86	30	44	31	131													Smp_026700	0.552179	0.503464	0.712609	0.827264	0.556052	0.609648	0.313322	0.407929	0.440044	0.632047
Smp_026770	Chr_6	16140270	16148261	7.991		22122	19034	10344	6802	968	780	816	810	631	1123													Smp_026770	94.4511	83.6637	46.7035	31.1429	27.0525	20.5647	31.6962	27.9296	33.3128	20.1514
Smp_026790	Chr_1.unplaced.SC_0071	215488	216352	0.864		116	118	164	264	13	3	7	7	13	11													Smp_026790	4.58066	4.79707	6.84845	11.1793	3.36018	0.731538	2.51479	2.23236	6.34764	1.8256
Smp_026810	Chr_1.unplaced.SC_0071	297657	306349	8.692		100	107	283	145	162	177	88	109	135	375													Smp_026810	0.392522	0.432386	1.17471	0.61034	4.16225	4.29025	3.14254	3.45531	6.55235	6.18641
Smp_026820	Chr_1.unplaced.SC_0071	315476	334292	18.816		85	48	100	78	49	53	12	12	24	104													Smp_026820	0.154126	0.0896029	0.19175	0.151667	0.581569	0.593442	0.197958	0.175725	0.538105	0.792562
Smp_026830	Chr_1.unplaced.SC_0071	340494	341378	0.884		911	701	1235	1503	165	195	78	96	102	387													Smp_026830	35.1601	27.8531	50.4054	62.2057	41.6835	46.4742	27.388	29.9226	48.6778	62.7749
Smp_026860	Chr_1.unplaced.SC_0071	483954	484469	0.515		0	0	0	0	0	0	0	0	0	0													Smp_026860	0	0	0	0	0	0	0	0	0	0
Smp_026880	Chr_3	22865502	22879793	14.291		0	0	0	0	0	0	0	0	0	0													Smp_026880	0	0	0	0	0	0	0	0	0	0
Smp_026910	Chr_3	22984680	23000916	16.236		11279	13440	12001	11341	2666	2242	877	1228	639	2705													Smp_026910	23.7015	29.0756	26.6686	25.5562	36.6702	29.0928	16.7664	20.8401	16.6037	23.89
Smp_026920	Chr_3	23022829	23024181	1.352		52	46	114	55	18	13	4	0	0	32													Smp_026920	1.31223	1.19506	3.04222	1.48837	2.97323	2.0258	0.918336	0	0	3.39391
Smp_026930	Chr_3	23055300	23063865	8.565		600	861	1231	762	309	306	112	164	111	464													Smp_026930	2.39005	3.53089	5.18553	3.255	8.05682	7.52703	4.0589	5.2759	5.46737	7.76815
Smp_027000	Chr_3	23240370	23246153	5.783		3846	4384	4892	3315	625	590	362	426	271	770													Smp_027000	22.6903	26.6272	30.5208	20.9727	24.1357	21.4945	19.43	20.2972	19.7697	19.0926
Smp_027010	Chr_3	23280587	23295038	14.451		2477	2195	3971	3618	444	445	213	229	172	586													Smp_027010	5.84806	5.33512	9.91435	9.15998	6.86148	6.48771	4.57509	4.36634	5.02127	5.81469
Smp_027040	Chr_3	23383387	23399171	15.784		1803	2000	2342	2117	385	407	396	410	226	628													Smp_027040	3.89729	4.45062	5.35343	4.90713	5.44724	5.43259	7.78747	7.15726	6.04052	5.70518
Smp_027080	SC_0322	22364	33601	11.237		3560	3212	3550	3249	176	189	244	305	216	338													Smp_027080	10.8089	10.04	11.3983	10.5785	3.4978	3.54357	6.73996	7.47876	8.10935	4.31314
Smp_027210	Chr_4	26516161	26516802	0.641		213	148	185	371	4	2	29	16	4	6													Smp_027210	11.3372	8.10983	10.413	21.1758	1.39359	0.657357	14.0429	6.87768	2.6326	1.34221
Smp_027220	Chr_4	26506818	26512118	5.3		3092	2595	3724	3784	240	231	167	230	158	382													Smp_027220	19.9043	17.1977	25.3511	26.1216	10.1127	9.1826	9.78045	11.9573	12.5766	10.3351
Smp_027240	Chr_4	26426934	26427458	0.524		3412	1989	2300	2625	46	90	50	61	77	118													Smp_027240	222.158	133.325	158.365	183.283	19.6047	36.186	29.6181	32.0759	61.993	32.2907
Smp_027250	Chr_4	26406205	26410038	3.833		1575	1335	2107	1612	410	470	256	282	115	598													Smp_027250	14.0193	12.2335	19.833	15.3869	23.8879	25.8338	20.731	20.2717	12.6573	22.3712
Smp_027290	Chr_4	26337681	26339314	1.633		0	4	0	0	6	19	0	0	0	14													Smp_027290	0	0.0860363	0	0	0.820536	2.4513	0	0	0	1.22933
Smp_027300	Chr_4	26292894	26317207	24.313		2025	2623	1971	1273	94	89	39	64	87	130													Smp_027300	2.84165	3.78938	2.9249	1.91564	0.86342	0.771225	0.497902	0.725307	1.50961	0.766711
Smp_027340	Chr_4	26026789	26028045	1.256		1084	1115	1217	1145	213	282	308	359	265	365													Smp_027340	29.4458	31.1812	34.9593	33.3534	37.8724	47.303	76.1166	78.7563	89.0101	41.6707
Smp_027360	Chr_4	25990352	25990667	0.315		1281	970	1855	1510	87	122	45	42	51	267													Smp_027360	138.747	108.161	212.469	175.384	61.6796	81.5979	44.3425	36.7383	68.3034	121.542
Smp_027370	Chr_4	25988322	25989737	1.415		3235	3206	2907	2089	329	400	111	147	120	502													Smp_027370	78.0012	79.582	74.1226	54.0139	51.9245	59.557	24.3492	28.6247	35.7773	50.8715
Smp_027390	Chr_4	25882059	25929435	47.376		1757	1567	2910	3487	454	504	211	215	182	876													Smp_027390	1.26531	1.16177	2.21614	2.69288	2.14008	2.24131	1.38243	1.25043	1.62068	2.65139
Smp_027400	Chr_4	25859156	25877426	18.27		640	1071	1516	1049	143	135	51	76	63	177													Smp_027400	1.19516	2.05901	2.9938	2.10068	1.74795	1.55677	0.866462	1.14619	1.45474	1.38919
Smp_027430	Chr_4	6367970	6370418	2.448		250	290	454	595	173	161	44	63	28	198													Smp_027430	3.48427	4.16097	6.69124	8.89261	15.7822	13.8562	5.57904	7.09103	4.82536	11.5979
Smp_027450	Chr_4	6414700	6422631	7.931		975	1257	2200	2500	192	211	103	112	98	214													Smp_027450	4.19431	5.56692	10.0082	11.5328	5.40637	5.60511	4.03114	3.89108	5.21292	3.86913
Smp_027480	Chr_4	6474612	6482628	8.016		8222	6452	7911	8028	655	686	340	383	298	1072													Smp_027480	34.9948	28.2712	35.607	36.6415	18.248	18.03	13.1656	13.165	15.6834	19.1763
Smp_027500	Chr_4	6527502	6533608	6.106		69	72	127	85	3	6	12	7	6	14													Smp_027500	0.385546	0.414175	0.750428	0.509314	0.109723	0.207026	0.610018	0.31588	0.41455	0.328775
Smp_027550	Chr_4	6661256	6666834	5.578		9995	12956	11867	10121	1815	1968	1088	1145	915	2307													Smp_027550	61.1347	81.5831	76.7582	66.3848	72.6659	74.3321	60.5436	56.5597	69.2031	59.3057
Smp_027580	Chr_4	6754989	6755120	0.131		0	0	0	0	0	0	0	0	0	0													Smp_027580	0	0	0	0	0	0	0	0	0	0
Smp_027610	Chr_3.unplaced.SC_0233	105005	105868	0.863		47425	35225	46679	49965	1846	1324	3153	3414	1877	2183													Smp_027610	1874.91	1433.67	1951.52	2118.26	477.698	323.226	1134.05	1090.02	917.564	362.719
Smp_027740	SC_0176	281210	288966	7.756		0	0	0	0	0	0	0	0	0	0													Smp_027740	0	0	0	0	0	0	0	0	0	0
Smp_027750	SC_0176	254863	264064	9.201		1747	1759	2788	3452	83	95	69	64	103	162													Smp_027750	6.47801	6.71489	10.9325	13.7265	2.01454	2.17529	2.32773	1.91657	4.72264	2.52468
Smp_027820	SC_0176	99381	128248	28.867		43	33	61	74	1	1	0	0	0	1													Smp_027820	0.0508218	0.0401532	0.0762413	0.0937894	0.00773626	0.0072984	0	0	0	0.00496736
Smp_027830	SC_0176	78834	89285	10.451		0	0	0	1	0	0	0	0	0	0													Smp_027830	0	0	0	0.00350079	0	0	0	0	0	0
Smp_027850	SC_0241	51567	56509	4.942		1053	1032	1158	1463	266	302	211	264	212	499													Smp_027850	7.26958	7.33474	8.45411	10.8309	12.0202	12.8746	13.2525	14.7191	18.0974	14.4785
Smp_027870	SC_0241	76199	80602	4.403		2176	3408	3596	1721	596	613	547	738	596	1177													Smp_027870	16.8614	27.1868	29.4668	14.3007	30.2294	29.332	38.5618	46.1836	57.1058	38.3314
Smp_027880	SC_0241	92695	95551	2.856		4782	3696	6667	7351	630	768	534	490	424	1531													Smp_027880	57.1262	45.455	84.2237	94.1699	49.2623	56.6543	58.0365	47.2735	62.6312	76.8677
Smp_027890	SC_0241	169419	196734	27.315		1048	2782	2007	874	402	392	210	337	197	511													Smp_027890	1.30901	3.57737	2.65099	1.17067	3.28668	3.02353	2.38636	3.39945	3.04262	2.68254
Smp_027900	SC_0241	197812	206928	9.116		3376	3756	5314	4993	223	292	149	188	279	602													Smp_027900	12.6352	14.472	21.0319	20.0392	5.46302	6.74851	5.07341	5.68243	12.9117	9.46933
Smp_027910	SC_0241	206922	214154	7.232		3495	3256	5669	7724	592	634	316	435	314	804													Smp_027910	16.4882	15.8137	28.282	39.0758	18.2808	18.4697	13.5627	16.5734	18.317	15.9413
Smp_027920	SC_0241	238167	240227	2.06		25955	31455	22980	17505	226	292	1320	1356	1233	491													Smp_027920	429.87	536.328	402.481	310.898	24.5004	29.8638	198.895	181.373	252.51	34.1776
Smp_027940	Chr_1.unplaced.SC_0010	250527	251501	0.974		0	0	0	0	0	0	0	0	0	0													Smp_027940	0	0	0	0	0	0	0	0	0	0
Smp_027970	Chr_1.unplaced.SC_0010	163499	182433	18.934		565	791	1037	796	300	283	161	191	179	385													Smp_027970	1.0181	1.46738	1.97605	1.53813	3.53844	3.14901	2.63938	2.77953	3.98835	2.91572
Smp_027990	Chr_1.unplaced.SC_0010	121509	133202	11.693		11	30	72	47	1	8	0	0	0	2													Smp_027990	0.032096	0.0901163	0.222161	0.14706	0.0190988	0.144143	0	0	0	0.0245262
Smp_028030	Chr_1	33433507	33494975	61.468		2337	4146	5210	4634	661	688	135	256	135	1073													Smp_028030	1.29716	2.36913	3.05809	2.75823	2.40151	2.35814	0.681715	1.14755	0.926547	2.5031
Smp_028050	Chr_1	33377070	33413052	35.982		808	1750	1497	1138	46	15	97	149	111	39													Smp_028050	0.766143	1.70829	1.50106	1.15713	0.285499	0.0878285	0.836767	1.14099	1.30143	0.15542
Smp_028060	Chr_1	33370444	33371404	0.96		4639	3020	7144	7496	237	336	209	261	205	668													Smp_028060	164.868	110.495	268.493	285.681	55.1328	73.7391	67.5761	74.9117	90.0877	99.7774
Smp_028070	Chr_1	33341447	33356974	15.527		2937	4058	3682	1526	794	858	258	312	210	1318													Smp_028070	6.45357	9.17978	8.55576	3.59576	11.42	11.642	5.15763	5.53665	5.70578	12.1718
Smp_028080	Chr_1	33317480	33326010	8.53		2100	2443	3917	3950	493	544	252	288	208	779													Smp_028080	8.39951	10.0596	16.5679	16.9423	12.9072	13.4363	9.17001	9.30301	10.2872	13.0953
Smp_028100	Chr_1	33279576	33280717	1.141		16620	12878	10835	11721	1996	1782	922	1204	552	2496													Smp_028100	496.969	396.434	342.614	375.84	390.668	329.042	250.821	290.751	204.097	313.679
Smp_028120	Chr_1	33155435	33177628	22.193		1526	1811	2426	2647	466	426	213	277	166	497													Smp_028120	2.34597	2.86623	3.944	4.36377	4.68924	4.04411	2.97908	3.43909	3.15555	3.2112
Smp_028130	Chr_1	33152244	33153125	0.881		0	7	2	9	2	4	0	1	0	2													Smp_028130	0	0.279081	0.0819061	0.373758	0.506975	0.956563	0	0.312755	0	0.325523
Smp_028140	Chr_1	33121201	33142211	21.01		574	939	1827	1350	261	320	102	108	96	527													Smp_028140	0.932115	1.56981	3.13743	2.35089	2.77426	3.20888	1.50693	1.41637	1.92765	3.59676
Smp_028150	Chr_1	33094895	33112343	17.448		49	52	91	88	11	36	0	8	1	52													Smp_028150	0.0958151	0.10468	0.188173	0.184527	0.140793	0.434697	0	0.126335	0.0241789	0.427351
Smp_028170	Chr_1	33051658	33066658	15		14977	19930	18213	15150	7313	8326	1663	1777	1280	9221													Smp_028170	34.0657	46.6685	43.8079	36.9526	108.877	116.943	34.4127	32.642	35.9999	88.1483
Smp_028190	Chr_ZW.unplaced.SC_0115	37685	55222	17.537		1155	1424	1314	811	291	262	151	184	109	462													Smp_028190	2.24704	2.85209	2.70335	1.69196	3.7057	3.14757	2.67264	2.89096	2.62213	3.77758
Smp_028200	Chr_ZW.unplaced.SC_0115	130305	152833	22.528		2464	4120	2236	1367	1754	1758	349	398	305	2463													Smp_028200	3.73166	6.42366	3.58106	2.22008	17.3876	16.4409	4.80863	4.86789	5.71163	15.6772
Smp_028210	Chr_ZW.unplaced.SC_0115	157347	160836	3.489		29	38	30	23	13	36	14	12	7	24													Smp_028210	0.283583	0.382552	0.310229	0.241185	0.832099	2.17386	1.2455	0.947677	0.846408	0.986364
Smp_028330	Chr_ZW.unplaced.SC_0115	423501	427201	3.7		11234	7932	4256	4208	796	917	310	354	252	1100													Smp_028330	103.59	75.299	41.5013	41.61	48.0445	52.2152	26.0063	26.3622	28.7331	42.6303
Smp_028340	Chr_ZW.unplaced.SC_0115	430709	441561	10.852		6379	6342	1944	1588	343	316	195	253	148	388													Smp_028340	20.0552	20.5269	6.46322	5.35383	7.05857	6.13489	5.57754	6.42378	5.75354	5.12683
Smp_028360	Chr_ZW.unplaced.SC_0115	516885	527141	10.256		715	704	568	673	132	203	12	11	10	242													Smp_028360	2.37855	2.41103	1.99817	2.40083	2.87428	4.17011	0.36318	0.295525	0.411344	3.38349
Smp_028370	Chr_ZW.unplaced.SC_0115	547155	547379	0.224		23	8	7	3	4	0	0	0	0	1													Smp_028370	3.50319	1.25444	1.12749	0.490001	3.9879	0	0	0	0	0.640146
Smp_028410	Chr_ZW.unplaced.SC_0115	730006	730789	0.783		8100	6087	3871	4388	245	319	154	174	93	700													Smp_028410	352.945	273.055	178.371	205.035	69.8774	85.8338	61.0488	61.2305	50.1077	128.193
Smp_028430	Chr_ZW.unplaced.SC_0115	751070	755054	3.984		907	705	407	453	86	105	59	42	32	151													Smp_028430	7.76733	6.21552	3.68585	4.16009	4.82072	5.55264	4.59675	2.90476	3.38855	5.43481
Smp_028440	Chr_ZW.unplaced.SC_0115	757023	762302	5.279		12059	13106	5372	3913	867	622	565	653	393	804													Smp_028440	77.9369	87.202	36.7153	27.1195	36.6775	24.8238	33.2212	34.0833	31.4068	21.8389
Smp_028450	Chr_ZW.unplaced.SC_0115	775788	775923	0.135		3	8	5	15	1	2	0	0	0	3													Smp_028450	0.758178	2.08144	1.33628	4.06519	1.65424	3.12123	0	0	0	3.1865
Smp_028490	Chr_ZW.unplaced.SC_0115	856152	895818	39.666		217	234	331	218	220	216	26	25	23	272													Smp_028490	0.186649	0.207207	0.301073	0.201077	1.23862	1.14727	0.203457	0.173661	0.24462	0.983281
Smp_028500	Chr_ZW.unplaced.SC_0115	910043	910112	0.069		1	0	1	0	39	54	16	15	33	188													Smp_028500	0.494464	0	0.522893	0	126.226	164.882	71.9762	59.8994	201.766	390.693
Smp_028550	Chr_ZW.unplaced.SC_0115	996799	1004761	7.962		313	616	403	273	145	132	26	26	22	160													Smp_028550	1.34124	2.71748	1.82619	1.25448	4.06704	3.49286	1.01361	0.89977	1.16569	2.88154
Smp_028620	Chr_ZW	4795634	4796439	0.805		561	785	456	236	270	287	63	69	61	379													Smp_028620	23.7766	34.2517	20.4377	10.7261	74.9032	75.1131	24.292	23.6175	31.9681	67.5104
Smp_028630	Chr_ZW	4773433	4795628	22.195		4205	3948	3139	2971	799	1005	163	217	145	1426													Smp_028630	6.4639	6.24784	5.10268	4.89746	8.03941	9.53983	2.27956	2.69392	2.75611	9.2128
Smp_028640	Chr_ZW	4766002	4772194	6.192		0	0	0	0	0	0	0	0	0	0													Smp_028640	0	0	0	0	0	0	0	0	0	0
Smp_028650	Chr_ZW	4745512	4765311	19.799		533	802	1083	807	229	237	61	80	45	363													Smp_028650	0.918475	1.42278	1.97355	1.49126	2.583	2.52194	0.956323	1.11334	0.958853	2.629
Smp_028670	Chr_ZW	4639133	4670538	31.405		1583	1449	1250	1110	1265	1275	171	182	116	1700													Smp_028670	1.71975	1.62061	1.43606	1.29315	8.99548	8.55344	1.69011	1.59681	1.55827	7.76206
Smp_028690	Chr_ZW	4500681	4537090	36.409		689	817	891	547	231	262	30	62	42	479													Smp_028690	0.645645	0.788172	0.88294	0.54967	1.41689	1.51608	0.255759	0.469206	0.486658	1.88649
Smp_028730	Chr_2	8008635	8027006	18.371		4224	3510	3531	4391	430	440	390	487	294	589													Smp_028730	7.84467	6.71092	6.93469	8.74489	5.22719	5.04603	6.58946	7.30426	6.75146	4.59737
Smp_028800	Chr_2	7829771	7836915	7.144		11	5	22	10	5	3	4	3	18	5													Smp_028800	0.0525333	0.0245831	0.111108	0.0512132	0.156301	0.0884727	0.173795	0.115707	1.06295	0.100359
Smp_028840	Chr_2	7584036	7604829	20.793		871	341	520	792	36	31	1	4	4	29													Smp_028840	1.42917	0.57603	0.902295	1.39358	0.38665	0.314104	0.014928	0.0530058	0.081157	0.19999
Smp_028850	Chr_2	7558772	7560943	2.171		386	544	826	897	412	354	203	222	186	769													Smp_028850	6.06612	8.8013	13.7272	15.1167	42.3809	34.3537	29.0238	28.1756	36.144	50.7918
Smp_028860	Chr_2	7555001	7555639	0.638		36	24	36	44	1	3	8	0	7	1													Smp_028860	1.92515	1.32129	2.03584	2.52322	0.350035	0.990673	3.89213	0	4.62871	0.224753
Smp_028870	Chr_2	7523191	7543724	20.533		148	357	1074	1209	1748	2247	1229	1186	921	2556													Smp_028870	0.245919	0.610694	1.88718	2.15426	19.0117	23.0558	18.5788	15.9152	18.923	17.8499
Smp_028910	SC_0476	10627	10948	0.321		54	40	64	149	2	3	1	0	0	7													Smp_028910	5.73948	4.37686	7.19345	16.9826	1.39142	1.969	0.96697	0	0	3.12694
Smp_028930	SC_0194	340789	343676	2.887		1078	771	1464	1124	75	75	53	85	37	185													Smp_028930	12.7396	9.38027	18.296	14.2444	5.80159	5.47323	5.69833	8.11246	5.40677	9.18866
Smp_028940	SC_0194	319961	323524	3.563		2295	2162	2721	2855	220	230	91	124	77	463													Smp_028940	21.9761	21.3132	27.5534	29.3166	13.7892	13.6001	7.92764	9.58928	9.11712	18.6334
Smp_028980	Chr_3	4746123	4747503	1.38		5764	4340	3695	4629	226	254	200	237	199	366													Smp_028980	142.504	110.463	96.6045	122.725	36.5731	38.7779	44.9851	47.3205	60.8355	38.0302
Smp_028990	Chr_3	4754625	4756309	1.684		3223	3348	3720	3895	648	837	456	380	275	591													Smp_028990	65.2983	69.8315	79.7009	84.6231	85.9341	104.716	84.0506	62.1759	68.8928	50.3237
Smp_029040	Chr_3	5064279	5070317	6.038		1281	1141	1483	1551	177	209	158	148	105	325													Smp_029040	7.23835	6.63744	8.86156	9.39815	6.54655	7.29261	8.12236	6.75381	7.33633	7.71822
Smp_029060	Chr_3	5103520	5120809	17.289		3063	3377	3293	2093	332	426	183	240	193	537													Smp_029060	6.0445	6.86071	6.87201	4.42918	4.28845	5.19122	3.28548	3.82491	4.70945	4.45381
Smp_029070	Chr_3	5125524	5133299	7.775		328	542	863	822	205	254	107	145	76	306													Smp_029070	1.43932	2.44854	4.00472	3.86808	5.88825	6.88276	4.27171	5.13864	4.12379	5.64349
Smp_029100	Chr_3	5256006	5257881	1.875		4360	3192	3167	3851	100	125	90	93	105	195													Smp_029100	79.3357	59.7956	60.9409	75.1443	11.9105	14.0455	14.8991	13.6666	23.625	14.9128
Smp_029150	Chr_3	5449662	5451977	2.315		6711	5087	5067	5266	558	544	499	471	189	458													Smp_029150	98.9054	77.1825	78.97	83.225	53.8289	49.5082	66.9064	56.0596	34.4424	28.3688
Smp_029160	Chr_3	5458079	5488031	29.952		1337	1081	2132	3182	1316	1630	234	192	195	1651													Smp_029160	1.52296	1.26767	2.56817	3.88685	9.81212	11.4655	2.42498	1.76626	2.74658	7.90403
Smp_029210	Chr_3	5569137	5574365	5.228		1514	1416	2580	2873	249	276	225	257	180	397													Smp_029210	9.88039	9.5134	17.8052	20.1059	10.6364	11.1225	13.3587	13.545	14.5251	10.8888
Smp_029230	Chr_3	5745194	5751093	5.899		893	730	1112	1177	62	61	87	110	95	121													Smp_029230	5.16484	4.34663	6.80125	7.29998	2.34718	2.17862	4.57782	5.13801	6.79404	2.94126
Smp_029240	Chr_3	5756498	5761844	5.346		17090	17022	15306	14245	1234	1156	1051	1141	610	1226													Smp_029240	109.068	111.838	103.299	97.4894	51.5488	45.5573	61.0228	58.8081	48.1375	32.8843
Smp_029310	SC_0163	192916	208451	15.535		1200	1817	1580	807	326	440	211	181	118	494													Smp_029310	2.63544	4.1082	3.66951	1.90058	4.6864	5.9672	4.21589	3.21031	3.20445	4.55977
Smp_029360	Chr_3.unplaced.SC_0124	972911	999859	26.948		985	1015	1625	1681	268	309	209	206	162	451													Smp_029360	1.24708	1.32296	2.17565	2.28226	2.22096	2.4158	2.40734	2.1063	2.53613	2.39981
Smp_029370	Chr_3.unplaced.SC_0124	955838	959696	3.858		564	483	733	1052	164	202	103	126	73	198													Smp_029370	4.9877	4.39737	6.85494	9.97648	9.49323	11.0311	8.28692	8.99888	7.98259	7.35919
Smp_029390	Chr_3.unplaced.SC_0124	902202	910694	8.492		4730	6103	6026	4048	1678	1878	1273	1364	823	2089													Smp_029390	19.0036	25.243	25.6024	17.4403	44.128	46.5924	46.5304	44.2573	40.8858	35.2741
Smp_029400	Chr_3.unplaced.SC_0124	890177	899478	9.301		0	0	0	0	0	0	0	0	0	0													Smp_029400	0	0	0	0	0	0	0	0	0	0
Smp_029410	Chr_3.unplaced.SC_0124	868435	873807	5.372		5482	5479	6878	4822	481	488	466	590	343	670													Smp_029410	34.8166	35.8239	46.1943	32.8409	19.9959	19.1387	26.9258	30.2619	26.9365	17.8841
Smp_029470	Chr_3.unplaced.SC_0124	365325	383459	18.134		3414	3613	4250	4803	502	591	213	278	190	659													Smp_029470	6.42323	6.99814	8.45585	9.69042	6.18219	6.86631	3.64589	4.22407	4.42021	5.21097
Smp_029480	Chr_3.unplaced.SC_0124	339504	351207	11.703		177	191	518	505	10	40	23	47	40	50													Smp_029480	0.516012	0.57325	1.59696	1.57877	0.190825	0.720099	0.610027	1.10658	1.44194	0.612632
Smp_029500	Chr_3.unplaced.SC_0124	289209	309888	20.679		11525	10998	11128	11759	1221	1255	1244	1427	1076	1941													Smp_029500	19.0149	18.6807	19.4156	20.8048	13.1862	12.7863	18.6728	19.0141	21.9516	13.4593
Smp_029520	Chr_3.unplaced.SC_0124	189168	195547	6.379		133	167	349	233	65	68	24	24	3	92													Smp_029520	0.711349	0.919543	1.97394	1.33637	2.27559	2.24588	1.16782	1.03667	0.198405	2.06806
Smp_029620	Chr_3	18502936	18503513	0.577		0	2	0	0	0	0	3	3	5	0													Smp_029620	0	0.121748	0	0	0	0	1.61385	1.4326	3.65576	0
Smp_029670	Chr_3	18646969	18669859	22.89		657	724	940	754	690	808	104	121	133	1540													Smp_029670	0.979272	1.11097	1.48165	1.20517	6.73187	7.43695	1.41028	1.45653	2.45126	9.64722
Smp_029700	Chr_3	18685589	18689784	4.195		1031	1014	1348	865	150	194	108	131	102	261													Smp_029700	8.38514	8.49012	11.5936	7.54411	7.98531	9.74315	7.99116	8.60438	10.2577	8.92145
Smp_029730	Chr_3	18700905	18724151	23.246		600	1175	1408	973	375	509	264	315	250	476													Smp_029730	0.880616	1.77541	2.18533	1.5314	3.6026	4.61317	3.52512	3.73373	4.53706	2.9362
Smp_029740	Chr_3	18771413	18785503	14.09		1600	1232	1961	1473	155	138	98	143	117	280													Smp_029740	3.87429	3.0712	5.02145	3.82486	2.45671	2.06347	2.1589	2.79644	3.50314	2.84954
Smp_029750	Chr_3	18791261	18792014	0.753		3455	2696	3768	5255	217	218	175	209	198	525													Smp_029750	156.544	125.757	180.542	255.33	64.3572	60.9946	72.1375	76.4771	110.931	99.975
Smp_029780	Chr_3	18839063	18841375	2.312		98	166	200	76	51	46	12	16	0	49													Smp_029780	1.44618	2.5219	3.12108	1.20268	4.92623	4.19179	1.61106	1.90683	0	3.03903
Smp_029790	Chr_3	18841664	18844184	2.52		157	98	159	148	49	38	6	9	3	42													Smp_029790	2.12561	1.36595	2.27645	2.14875	4.34238	3.17697	0.739042	0.984061	0.502231	2.38988
Smp_029800	Chr_3	18850463	18876454	25.991		580	683	1520	1602	270	421	102	163	128	582													Smp_029800	0.761357	0.923008	2.11	2.25509	2.31992	3.41263	1.21813	1.728	2.07764	3.2109
Smp_029820	Chr_3	18903591	18904036	0.445		55812	30794	34246	42075	1486	1157	2736	2931	1270	1377													Smp_029820	4279.09	2430.6	2776.59	3459.3	745.747	547.776	1908.42	1814.83	1204	443.712
Smp_029850	Chr_3	18960307	18963130	2.823		2719	2602	4166	3692	516	529	201	290	217	941													Smp_029850	32.8611	32.3746	53.244	47.8492	40.8199	39.4797	22.1006	28.3053	32.4289	47.7976
Smp_029890	Chr_3	19060220	19077650	17.43		8316	8321	10269	9060	1670	1738	679	797	502	2313													Smp_029890	16.278	16.7682	21.2566	19.0175	21.3969	21.0079	12.0918	12.5991	12.1504	19.0285
Smp_029900	Chr_3	19079389	19080229	0.84		6122	4806	4134	4326	346	328	254	288	212	474													Smp_029900	248.655	200.961	177.563	188.422	91.9876	82.2667	93.8583	94.4699	106.473	80.9145
Smp_029930	Chr_3	19202546	19217536	14.99		0	0	2	0	3	2	0	1	2	3													Smp_029930	0	0	0.00481383	0	0.0446943	0.0281098	0	0.0183814	0.0562874	0.0286977
Smp_029940	Chr_3	19221874	19235936	14.062		982	1204	1840	1334	206	194	111	128	92	343													Smp_029940	2.38258	3.00737	4.72099	3.47082	3.27154	2.90659	2.45016	2.50809	2.76009	3.49763
Smp_029950	Chr_3	19240177	19240461	0.284		0	2	0	1	0	0	0	0	0	0													Smp_029950	0	0.247354	0	0.128827	0	0	0	0	0	0
Smp_029970	Chr_3	19250008	19257532	7.524		1833	1559	3618	4373	319	343	129	220	197	705													Smp_029970	8.31184	7.27789	17.3493	21.2645	9.46835	9.6045	5.32181	8.05664	11.0459	13.4359
Smp_029990	Chr_3	19314025	19356799	42.774		317	513	1140	1043	305	394	128	135	108	527													Smp_029990	0.25285	0.421255	0.961584	0.89213	1.5924	1.94064	0.928856	0.869629	1.06519	1.76668
Smp_030000	Chr_3	19367861	19383393	15.532		6446	10315	7590	4448	2440	3648	2209	2197	1553	4397													Smp_030000	14.1595	23.3265	17.631	10.4776	35.0829	49.4831	44.1455	38.9747	42.182	40.5935
Smp_030010	Chr_3	19409005	19424459	15.454		1076	1270	2638	2595	994	1469	206	300	340	2180													Smp_030010	2.3755	2.88649	6.1588	6.14356	14.3641	20.0267	4.13756	5.34885	9.28156	20.2275
Smp_030020	Chr_3	19427918	19432296	4.378		448	542	749	1339	112	141	51	81	105	251													Smp_030020	3.49129	4.34842	6.1726	11.19	5.71314	6.78536	3.61587	5.09788	10.118	8.22101
Smp_030030	Chr_3	19432396	19433051	0.655		2738	2099	1946	2049	122	171	116	124	115	243													Smp_030030	142.618	112.559	107.192	114.452	41.596	55.0027	54.9712	52.1628	74.0695	53.1976
Smp_030050	Chr_3	19455576	19460371	4.795		0	1	2	1	4	4	7	2	3	12													Smp_030050	0	0.0073252	0.0150489	0.00763019	0.186296	0.175752	0.453135	0.114927	0.263946	0.358856
Smp_030110	Chr_3	19595974	19627591	31.617		116	215	332	192	23	59	27	30	38	56													Smp_030110	0.125176	0.23885	0.378861	0.22218	0.162458	0.393152	0.26507	0.261445	0.507044	0.253977
Smp_030150	Chr_3	19787998	19816431	28.433		1458	1371	2416	2122	518	511	141	146	138	834													Smp_030150	1.74952	1.69365	3.06575	2.73053	4.06855	3.78641	1.53927	1.41485	2.04757	4.20601
Smp_030180	Chr_3	19849734	19854600	4.866		2570	1828	2411	2479	102	173	120	191	120	259													Smp_030180	18.0196	13.1951	17.8767	18.6392	4.68124	7.49037	7.65468	10.8154	10.4038	7.63229
Smp_030220	Chr_3	19925265	19929273	4.008		2946	3381	3401	3016	533	557	317	315	227	719													Smp_030220	25.0778	29.6296	30.6155	27.5313	29.6983	29.2791	24.5499	21.6552	23.8936	25.7234
Smp_030250	Chr_3	20016896	20020893	3.997		2238	2721	3281	2938	323	403	298	251	238	448													Smp_030250	19.1034	23.9113	29.6165	26.8931	18.0468	21.2422	23.142	17.3029	25.1204	16.072
Smp_030260	Chr_3	20053358	20055604	2.246		3271	2734	3312	3833	240	324	76	108	24	179													Smp_030260	49.6883	42.756	53.2038	62.4385	23.8635	30.3924	10.5032	13.2493	4.50801	11.428
Smp_030280	Chr_3	20089305	20103492	14.187		2898	2287	3131	3112	189	250	222	296	135	314													Smp_030280	6.96934	5.66218	7.9626	8.02551	2.97512	3.71261	4.85714	5.74886	4.01445	3.1737
Smp_030290	Chr_3	20109060	20110795	1.735		6278	3819	6017	7670	294	396	235	294	267	768													Smp_030290	123.454	77.314	125.125	161.741	37.8426	48.0867	42.0423	46.6905	64.9224	63.473
Smp_030300	Chr_3	20119047	20198295	79.248		30615	41685	42047	25417	8329	7208	3737	5289	2871	17484													Smp_030300	13.1804	18.4756	19.143	11.7344	23.4713	19.1627	14.637	18.3893	15.2837	31.6359
Smp_030320	Chr_3	20213100	20236432	23.332		3511	3517	4465	6033	687	783	329	453	213	943													Smp_030320	5.13408	5.29454	6.90449	9.4603	6.57563	7.07032	4.37685	5.34966	3.85133	5.79545
Smp_030330	Chr_3	20239258	20240019	0.761		4779	3747	4115	4662	293	315	216	162	157	453													Smp_030330	214.257	172.945	195.096	224.136	85.9836	87.2078	88.1023	58.6558	87.0358	85.3573
Smp_030350	SC_0370	27916	29370	1.454		3	1	4	1	0	0	0	0	0	0													Smp_030350	0.0703948	0.024157	0.0992562	0.0251628	0	0	0	0	0	0
Smp_030370	SC_0111	24644	26085	1.441		50669	50714	62422	51923	8005	5750	5118	6188	4461	12702													Smp_030370	1199.67	1236.15	1562.92	1318.32	1240.59	840.685	1102.44	1183.22	1306.02	1263.97
Smp_030400	SC_0111	95640	117163	21.523		3910	3657	2003	1610	603	546	170	160	123	663													Smp_030400	6.19809	5.96802	3.35769	2.73682	6.25673	5.34465	2.45168	2.04832	2.41093	4.41711
Smp_030440	SC_0111	218938	219813	0.875		1077	739	567	622	82	118	18	31	21	143													Smp_030440	41.9944	29.665	23.3796	26.0079	20.9285	28.4121	6.38532	9.76189	10.125	23.4345
Smp_030500	SC_0246	131474	138995	7.521		12574	10938	9252	6924	745	898	634	706	423	1082													Smp_030500	57.0403	51.0823	44.3836	33.6826	22.1214	25.1553	26.1657	25.8648	23.7273	20.629
Smp_030650	Chr_3.unplaced.SC_0083	1067337	1089431	22.094		25	65	93	74	3	5	0	0	0	3													Smp_030650	0.0386055	0.103335	0.15187	0.122541	0.0303235	0.0476788	0	0	0	0.0194704
Smp_030690	Chr_3.unplaced.SC_0083	943847	945953	2.106		24568	16914	16484	19530	815	746	1575	1731	1040	1085													Smp_030690	398.011	282.095	282.401	339.287	86.4235	74.6294	232.135	226.474	208.333	73.8752
Smp_030710	Chr_3.unplaced.SC_0083	900786	910963	10.177		2007	2351	1888	926	184	189	323	315	174	188													Smp_030710	6.72839	8.11411	6.69336	3.32901	4.03767	3.91266	9.85147	8.52847	7.21294	2.6489
Smp_030730	Chr_3.unplaced.SC_0083	804277	806104	1.827		278994	272436	175766	127339	14679	12382	4350	4760	2565	13332													Smp_030730	5210.03	5237.62	3471.03	2550.04	1794.28	1427.85	739.042	717.875	592.286	1046.37
Smp_030760	Chr_1	39464243	39484616	20.373		1601	1470	2170	2583	177	155	69	108	71	170													Smp_030760	2.68114	2.53437	3.84297	4.63867	1.94022	1.6029	1.05127	1.46066	1.47023	1.19652
Smp_030780	Chr_6	5420031	5461501	41.47		5081	6953	7064	4973	780	822	522	579	485	1152													Smp_030780	4.18022	5.88906	6.14581	4.38741	4.20042	4.17607	3.9071	3.84702	4.9339	3.98332
Smp_030830	Chr_6	5566800	5573608	6.808		18993	19479	16988	13997	1454	1167	1270	1320	809	1550													Smp_030830	95.1826	100.497	90.0295	75.221	47.6955	36.1144	57.9032	53.4238	50.1316	32.6467
Smp_030860	Chr_6	5654276	5673458	19.182		1680	2822	3162	2097	558	547	273	430	204	780													Smp_030860	2.98813	5.16739	5.94744	3.99971	6.4964	6.0079	4.41761	6.17668	4.48662	5.8308
Smp_030870	Chr_6	5675117	5678320	3.203		581	442	875	1062	109	105	29	44	12	81													Smp_030870	6.18875	4.847	9.85629	12.1309	7.5998	6.90656	2.81034	3.78509	1.58055	3.62623
Smp_030910	Chr_6	5811058	5815062	4.004		32	27	45	50	5	14	0	2	1	3													Smp_030910	0.272671	0.236852	0.40549	0.456877	0.278874	0.736654	0	0.137631	0.105363	0.107437
Smp_030920	Chr_6	5822257	5823053	0.796		9639	8680	8456	8418	519	671	415	421	345	922													Smp_030920	413.145	383.014	383.278	386.919	145.609	177.598	161.828	145.73	182.847	166.091
Smp_030930	Chr_6	5825806	5831685	5.879		1760	1643	1660	1710	84	124	52	36	53	172													Smp_030930	10.2139	9.81617	10.1875	10.6418	3.19086	4.44373	2.74548	1.68725	3.80325	4.19519
Smp_031000	Chr_ZW	6602331	6617002	14.671		2192	3568	2900	1839	961	958	252	343	205	1421													Smp_031000	5.09758	8.54227	7.13182	4.58612	14.6284	13.7574	5.33162	6.44191	5.89491	13.8887
Smp_031010	Chr_ZW	6634186	6641105	6.919		1590	1707	1224	1543	263	229	53	72	62	376													Smp_031010	7.84039	8.66559	6.38264	8.15918	8.48877	6.97303	2.37767	2.86728	3.78034	7.79241
Smp_031020	Chr_ZW	6643636	6658903	15.267		0	4	14	5	0	0	14	4	10	0													Smp_031020	0	0.00920268	0.0330854	0.0119823	0	0	0.284638	0.0721916	0.276331	0
Smp_031040	Chr_ZW	6725155	6757149	31.994		2435	3033	2066	1722	544	544	292	388	201	754													Smp_031040	2.59665	3.32975	2.32983	1.96919	3.7972	3.58228	2.83291	3.34152	2.65039	3.37932
Smp_031050	Chr_ZW	6772892	6793297	20.405		1325	1598	1431	744	824	889	140	191	205	1366													Smp_031050	2.21545	2.75073	2.53026	1.33401	9.01827	9.17899	2.12966	2.57915	4.23838	9.59934
Smp_031070	Chr_ZW	6808541	6816132	7.591		2996	3523	2434	3018	475	459	126	192	117	897													Smp_031070	13.4656	16.3013	11.5687	14.546	13.9742	12.7392	5.15216	6.96919	6.50234	16.9442
Smp_031100	Chr_ZW	6927458	6956272	28.814		2379	3492	3871	3215	785	765	293	306	240	1490													Smp_031100	2.81692	4.25676	4.8471	4.08226	6.08413	5.59355	3.15633	2.92616	3.51391	7.41498
Smp_031180	Chr_ZW	7185735	7200918	15.183		1150	802	1026	365	34	74	2	4	0	50													Smp_031180	2.58419	1.85535	2.4381	0.879547	0.500097	1.02684	0.0408875	0.072591	0	0.472215
Smp_031190	Chr_ZW	7207377	7212581	5.204		1970	1448	1330	1330	106	136	56	56	10	144													Smp_031190	12.9155	9.77326	9.22097	9.35057	4.54885	5.50594	3.34017	2.96504	0.810673	3.96782
Smp_031220	Chr_ZW	7322993	7324351	1.358		154	68	79	87	40	54	17	14	21	89													Smp_031220	3.86905	1.7588	2.09889	2.34392	6.57798	8.37768	3.88568	2.84059	6.52383	9.39761
Smp_031250	Chr_ZW	7371168	7371929	0.761		445	362	270	278	29	29	10	7	6	52													Smp_031250	19.9507	16.7083	12.8009	13.3655	8.51032	8.02866	4.07881	2.53451	3.32621	9.79819
Smp_031270	Chr_ZW	7432818	7439287	6.469		1524	1488	1159	816	213	134	60	40	31	187													Smp_031270	8.03769	8.0793	6.46411	4.61505	7.35318	4.36413	2.87894	1.70374	2.02166	4.14507
Smp_031300	Chr_ZW	7569490	7570291	0.801		396	385	228	151	182	164	7	5	6	293													Smp_031300	16.8673	16.8825	10.2699	6.89713	50.7425	43.1361	2.71259	1.71996	3.16011	52.452
Smp_031310	Chr_ZW	7605539	7606279	0.74		44350	32340	17416	21147	2557	2153	1869	1530	833	2272													Smp_031310	2044.77	1535.03	849.139	1045.54	771.67	612.974	783.963	569.692	474.893	440.254
Smp_031350	Chr_ZW	7667659	7668700	1.041		550	378	588	888	58	82	19	50	70	193													Smp_031350	18.0258	12.7541	20.3793	31.2094	12.4426	16.5956	5.66528	13.2343	28.3681	26.5848
Smp_031360	Chr_ZW	7684354	7707966	23.612		10789	12163	5302	4520	1182	1182	445	490	192	1378													Smp_031360	15.5895	18.0932	8.10157	7.00373	11.1794	10.5466	5.84986	5.71799	3.43045	8.36842
Smp_031390	SC_0288	29278	39817	10.539		3	7	13	17	0	5	0	0	0	8													Smp_031390	0.00971193	0.0233296	0.0445047	0.0590165	0	0.099954	0	0	0	0.108847
Smp_031400	SC_0288	80323	87654	7.331		1052	1461	1318	1055	209	258	55	86	64	417													Smp_031400	4.89594	6.99995	6.48656	5.26518	6.36672	7.41457	2.32872	3.23233	3.68298	8.15643
Smp_031430	Chr_1.unplaced.SC_0071	1127735	1128142	0.407		22	25	13	14	8	10	7	7	10	18													Smp_031430	1.84422	2.15751	1.15242	1.25851	4.38963	5.17649	5.33853	4.73897	10.3655	6.34169
Smp_031530	Chr_1.unplaced.SC_0071	747946	754513	6.567		41	77	290	147	18	29	0	1	0	37													Smp_031530	0.21301	0.411843	1.59328	0.818981	0.612122	0.93038	0	0.0419579	0	0.807908
Smp_031560	Chr_1.unplaced.SC_0071	660876	664338	3.462		494	444	813	899	95	88	41	55	35	154													Smp_031560	4.86837	4.50468	8.47278	9.50072	6.12815	5.35532	3.676	4.3774	4.26505	6.37853
Smp_031570	Chr_1.unplaced.SC_0071	634271	637679	3.408		30157	23842	25992	26142	1239	947	1665	2067	1204	1963													Smp_031570	301.906	245.726	275.171	280.649	81.1903	58.5437	151.647	167.117	149.042	82.5939
Smp_031590	Chr_1.unplaced.SC_0071	568591	569690	1.099		3679	2783	5136	5640	919	874	467	499	281	940													Smp_031590	114.213	88.9454	168.612	187.761	186.746	167.55	131.898	125.107	107.868	122.647
Smp_031680	Chr_7	8852782	8922609	69.827		44	63	123	138	6	14	0	2	0	22													Smp_031680	0.0214987	0.0316902	0.0635542	0.0723068	0.0191894	0.042241	0	0.007892	0	0.0451779
Smp_031690	Chr_7	8979648	8987314	7.666		1233	1398	2214	1749	201	175	104	110	108	366													Smp_031690	5.48754	6.4054	10.4201	8.34727	5.85544	4.80949	4.21097	3.9537	5.94344	6.84604
Smp_031710	Chr_7	9126881	9144731	17.85		3635	3712	4876	4250	376	489	327	421	301	856													Smp_031710	6.94784	7.30429	9.8557	8.71113	4.70416	5.77165	5.68627	6.49866	7.11396	6.87642
Smp_031720	Chr_7	9159710	9162596	2.886		11396	12051	11958	7323	1301	1279	1120	1276	563	1267													Smp_031720	134.722	146.668	149.494	92.836	100.673	93.3692	120.459	121.824	82.2991	62.9517
Smp_031730	Chr_7	9166902	9171804	4.902		3641	3646	2816	2295	305	337	443	565	308	407													Smp_031730	25.3414	26.1247	20.7263	17.129	13.895	14.4839	28.051	31.7582	26.507	11.9055
Smp_031770	Chr_7	9337402	9366720	29.318		25537	21975	19908	14270	12901	12585	1068	1311	922	20967													Smp_031770	29.718	26.3271	24.4994	17.8079	98.2702	90.4375	11.3072	12.3211	13.2672	102.548
Smp_031860	Chr_7	9715002	9724017	9.015		5173	5434	4932	5293	643	636	530	527	311	864													Smp_031860	19.5776	21.172	19.7387	21.4813	15.9286	14.8635	18.2485	16.1074	14.5538	13.7428
Smp_031880	SC_0148	12269	23973	11.704		22251	21802	23036	20315	3690	3706	802	1058	754	4744													Smp_031880	64.8633	65.429	71.0125	63.5048	70.4084	66.7115	21.2695	24.9076	27.1782	58.1216
Smp_031920	SC_0290	10048	13747	3.699		5869	6247	6507	8850	728	749	460	465	304	1292													Smp_031920	54.1332	59.3192	63.4686	87.5352	43.9521	42.6606	38.6004	34.6377	34.6715	50.0847
Smp_031940	SC_0290	41636	47414	5.778		1248	1463	2824	3381	224	276	247	293	270	573													Smp_031940	7.36921	8.89354	17.6339	21.4088	8.65771	10.0638	13.269	13.9724	19.7137	14.2201
Smp_031950	SC_0290	53467	65166	11.699		3249	2440	3123	4029	782	733	459	437	299	840													Smp_031950	9.47512	7.3257	9.63131	12.6	14.9276	13.2003	12.1782	10.2923	10.7822	10.2957
Smp_031990	SC_0125	167507	172439	4.932		1241	1273	1823	1893	60	37	87	64	53	122													Smp_031990	8.58484	9.06595	13.336	14.0427	2.71682	1.58055	5.47538	3.5755	4.53352	3.54702
Smp_032000	SC_0125	220733	221910	1.177		1112	1415	1179	849	73	89	58	69	37	115													Smp_032000	32.2338	42.2268	36.1409	26.3909	13.8509	15.931	15.2957	16.153	13.262	14.0103
Smp_032060	SC_0125	299324	306250	6.926		4896	4243	5500	6468	537	592	300	373	307	875													Smp_032060	24.1181	21.5178	28.6512	34.1673	17.3151	18.0081	13.4449	14.8391	18.6999	18.1156
Smp_032120	SC_0125	463448	465189	1.741		3030	2751	3526	3185	453	547	341	370	232	630													Smp_032120	59.3783	55.5009	73.0711	66.9321	58.1075	66.1939	60.7958	58.5576	56.2176	51.8882
Smp_032150	SC_0125	491362	497724	6.362		2326	2187	2237	2088	797	778	369	425	198	525													Smp_032150	12.4738	12.0743	12.6863	12.0077	27.9767	25.7641	18.0032	18.4067	13.1297	11.8329
Smp_032180	SC_0125	564235	565237	1.002		0	0	0	0	0	0	0	0	0	0													Smp_032180	0	0	0	0	0	0	0	0	0	0
Smp_032230	SC_0125	729982	737829	7.847		2469	2212	2920	2879	407	451	239	257	194	629													Smp_032230	10.735	9.90124	13.4258	13.4234	11.5831	12.1088	9.45393	9.02422	10.4299	11.4941
Smp_032240	SC_0125	775072	777755	2.683		1407	1120	2212	2864	336	372	179	208	114	388													Smp_032240	17.8919	14.6624	29.7459	39.0549	27.9673	29.2114	20.7086	21.3611	17.9253	20.7366
Smp_032250	SC_0125	781700	793429	11.729		2451	2625	2947	3934	262	287	179	192	164	385													Smp_032250	7.12961	7.86097	9.06528	12.2715	4.98853	5.15526	4.73707	4.51046	5.89883	4.70681
Smp_032260	SC_0125	826280	827072	0.792		52072	38720	30526	30912	2187	1890	3020	3203	1819	1933													Smp_032260	2243.17	1717.19	1390.62	1427.99	616.675	502.766	1183.59	1114.33	968.926	349.972
Smp_032280	Chr_ZW	51684218	51694281	10.063		1331	3305	4550	1665	567	618	271	261	100	465													Smp_032280	4.51268	11.5359	16.3135	6.05355	12.5831	12.9387	8.35911	7.1465	4.19233	6.62602
Smp_032310	Chr_ZW	51546426	51560900	14.474		3086	2545	3336	3593	467	751	235	304	180	899													Smp_032310	7.2743	6.176	8.31572	9.08223	7.20545	10.9315	5.03962	5.78716	5.24647	8.90632
Smp_032320	Chr_ZW	51542552	51544146	1.594		14655	14364	11771	11195	1226	1079	838	972	552	1067													Smp_032320	313.676	316.516	266.433	256.956	171.765	142.614	163.183	168.019	146.094	95.985
Smp_032370	Chr_ZW	51466832	51469782	2.95		30	14	18	31	0	0	0	4	0	0													Smp_032370	0.346963	0.166692	0.220147	0.384471	0	0	0	0.37361	0	0
Smp_032420	Chr_ZW	51314169	51318012	3.843		4034	3179	2995	3152	169	193	110	181	62	265													Smp_032420	35.8137	29.0555	28.1183	30.0082	9.82085	10.5808	8.88465	12.9774	6.80619	9.88787
Smp_032470	Chr_ZW	51077274	51077525	0.251		20	18	14	4	1	1	4	3	1	2													Smp_032470	2.71857	2.51888	2.01241	0.583056	0.889731	0.839375	4.94657	3.29327	1.68077	1.14257
Smp_032480	Chr_ZW	51023069	51049798	26.729		2489	4025	4654	3716	409	488	449	443	415	684													Smp_032480	3.17706	5.28921	6.28211	5.08647	3.41722	3.84651	5.21413	4.56669	6.55011	3.66945
Smp_032490	Chr_ZW	50984813	51022048	37.235		740	981	1716	1167	70	77	55	101	91	142													Smp_032490	0.678054	0.925392	1.66275	1.14668	0.419836	0.435681	0.45849	0.747395	1.03103	0.546845
Smp_032500	Chr_ZW	50960846	50980024	19.178		7450	10488	6801	2793	139	142	324	397	258	130													Smp_032500	13.2537	19.2087	12.7947	5.32833	1.61862	1.55996	5.24397	5.70384	5.67544	0.972002
Smp_032510	Chr_ZW	50911694	50934654	22.96		7453	10903	8903	5446	1318	1259	1278	1518	800	1606													Smp_032510	11.075	16.6795	13.9903	8.6782	12.8196	11.5527	17.2773	18.2171	14.6994	10.03
Smp_032520	Chr_ZW	50889343	50896399	7.056		12863	12761	15426	13437	2488	2663	643	705	424	3262													Smp_032520	62.1967	63.5235	78.8782	69.6735	78.7453	79.5137	28.2859	27.5303	25.3507	66.2907
Smp_032580	Chr_2	320393	345605	25.212		5388	5290	5953	4454	707	738	669	737	395	884													Smp_032580	7.29128	7.36981	8.51904	6.46348	6.26246	6.16707	8.23639	8.05453	6.60956	5.02773
Smp_032640	Chr_2	615795	616969	1.174		334	325	502	692	72	60	24	21	8	83													Smp_032640	9.70648	9.72351	15.4276	21.5656	13.6961	10.7674	6.34543	4.92869	2.87478	10.1376
Smp_032670	Chr_2	685929	704743	18.814		0	0	0	0	0	0	0	0	0	0													Smp_032670	0	0	0	0	0	0	0	0	0	0
Smp_032690	Chr_2	728350	743584	15.234		0	0	0	0	0	0	0	0	0	0													Smp_032690	0	0	0	0	0	0	0	0	0	0
Smp_032710	Chr_2	751880	757270	5.39		0	0	0	0	0	0	0	0	0	0													Smp_032710	0	0	0	0	0	0	0	0	0	0
Smp_032720	Chr_2	837616	842769	5.153		32	39	94	116	22	18	1	6	1	82													Smp_032720	0.211872	0.265835	0.658158	0.82361	0.953444	0.735939	0.0602363	0.320827	0.0818696	2.28182
Smp_032740	Chr_2	921807	938818	17.011		0	5	1	1	1	0	0	0	0	0													Smp_032740	0	0.010324	0.00212096	0.00215077	0.0131281	0	0	0	0	0
Smp_032750	Chr_2	939650	940297	0.647		9	9	9	0	0	0	0	0	0	0													Smp_032750	0.474594	0.488592	0.501881	0	0	0	0	0	0	0
Smp_032760	Chr_2	940618	941177	0.559		23951	17281	17984	22727	906	862	1415	1628	814	1130													Smp_032760	1461.83	1085.84	1160.74	1487.49	361.95	324.882	785.711	802.459	614.321	289.864
Smp_032770	Chr_2	946894	951991	5.097		1298	1268	2179	2489	234	236	106	163	99	292													Smp_032770	8.68848	8.73801	15.4243	17.8663	10.2526	9.75499	6.4552	8.81157	8.19414	8.21477
Smp_032780	Chr_2	999296	1011418	12.122		4014	3893	4055	3471	153	148	287	380	163	234													Smp_032780	11.2976	11.2802	12.0692	10.4762	2.81871	2.57227	7.34896	8.63753	5.67278	2.76802
Smp_032790	Chr_2	1015721	1015984	0.263		2607	1626	1956	2086	188	204	79	107	72	233													Smp_032790	338.196	217.156	268.334	290.19	159.637	163.42	93.2373	112.101	115.494	127.036
Smp_032800	Chr_2	1035557	1058769	23.212		3442	2901	5481	4343	379	410	197	310	185	583													Smp_032800	5.0592	4.38978	8.51941	6.84543	3.64636	3.72135	2.63434	3.67984	3.36234	3.6015
Smp_032810	Chr_2	1058649	1065955	7.306		9266	6225	9802	10242	639	625	474	585	367	814													Smp_032810	43.2709	29.9273	48.4058	51.2895	19.5323	18.0231	20.138	22.0626	21.1919	15.9761
Smp_032820	Chr_2	1070508	1086890	16.382		3375	3217	3487	3099	420	519	185	250	214	630													Smp_032820	7.02895	6.89751	7.67975	6.92115	5.72552	6.67467	3.50528	4.20488	5.51099	5.51443
Smp_032920	Chr_ZW	15202318	15206909	4.591		3361	2073	1607	2143	213	327	100	95	96	342													Smp_032920	24.9773	15.8599	12.6291	17.0781	10.3611	15.0062	6.761	5.7016	8.82159	10.6818
Smp_032930	Chr_ZW	15207630	15228128	20.498		2075	2609	1578	1132	408	389	114	171	135	531													Smp_032930	3.45374	4.47065	2.77752	2.0205	4.4451	3.99823	1.72628	2.29861	2.77847	3.71458
Smp_032950	Chr_ZW	15262895	15263298	0.403		22029	14521	8461	12551	754	1318	268	233	113	871													Smp_032950	1864.98	1265.61	757.493	1139.45	417.829	689.033	206.418	159.306	118.292	309.913
Smp_032970	Chr_ZW	15303525	15306130	2.605		111	135	167	212	0	0	0	0	0	0													Smp_032970	1.45378	1.82026	2.31298	2.9775	0	0	0	0	0	0
Smp_032980	Chr_ZW	15307421	15309164	1.743		0	1	1	0	0	0	0	0	0	0													Smp_032980	0	0.0201516	0.0206997	0	0	0	0	0	0	0
Smp_032990	Chr_ZW	15318616	15320859	2.243		0	0	5	0	0	0	0	0	0	0													Smp_032990	0	0	0.0804272	0	0	0	0	0	0	0
Smp_033000	Chr_ZW	15333249	15333663	0.414		111	86	152	175	1	1	0	0	1	10													Smp_033000	9.14758	7.29636	13.2466	15.4654	0.539426	0.508896	0	0	1.01902	3.46359
Smp_033010	Chr_ZW	15348004	15355797	7.793		209	110	147	238	1	13	2	1	0	20													Smp_033010	0.915009	0.495788	0.680573	1.11737	0.0286568	0.351454	0.0796606	0.035357	0	0.368004
Smp_033020	Chr_ZW	15369612	15379892	10.28		6349	6451	4347	3445	296	296	175	198	166	425													Smp_033020	21.0715	22.0415	15.2566	12.2608	6.4303	6.06636	5.284	5.30704	6.81237	5.9282
Smp_033040	Chr_ZW	15409861	15410992	1.131		13039	11003	3523	2483	1022	1102	98	102	63	1700													Smp_033040	393.337	341.709	112.386	80.3226	201.8	205.281	26.8956	24.8495	23.4996	215.533
Smp_033050	Chr_ZW	15422359	15428815	6.456		4620	6527	3997	3041	1005	1151	440	482	465	1755													Smp_033050	24.4153	35.5106	22.3374	17.2336	34.7644	37.5614	21.1547	20.5714	30.3859	38.9799
Smp_033110	Chr_7	5829464	5830980	1.516		1416	1571	2370	1319	215	222	76	125	116	307													Smp_033110	31.8675	36.3986	56.4042	31.8324	31.6717	30.852	15.5608	22.7191	32.2806	29.038
Smp_033130	Chr_7	5886449	5898678	12.229		270	320	831	808	204	289	80	58	70	291													Smp_033130	0.75328	0.919109	2.45173	2.41738	3.72539	4.97893	2.03057	1.30682	2.41485	3.41216
Smp_033140	Chr_7	5907560	5921505	13.945		466	546	568	621	95	125	61	66	27	136													Smp_033140	1.14012	1.37525	1.46958	1.62928	1.52138	1.88852	1.35778	1.30408	0.816823	1.39845
Smp_033150	Chr_7	5923485	5941110	17.625		68	81	190	170	34	51	71	102	66	87													Smp_033150	0.131633	0.161422	0.388944	0.352893	0.430807	0.609636	1.2504	1.5946	1.57978	0.707811
Smp_033200	Chr_7	6156658	6161488	4.83		35	25	62	39	12	20	0	0	0	26													Smp_033200	0.247232	0.181803	0.463134	0.295421	0.554839	0.872393	0	0	0	0.771886
Smp_033210	Chr_7	6168657	6174484	5.827		437	428	552	701	80	89	63	46	76	80													Smp_033210	2.5587	2.57992	3.41788	4.40146	3.06604	3.21791	3.35594	2.17517	5.50239	1.96867
Smp_033250	SC_0199	446737	447750	1.013		0	0	1	5	20	0	1611	2077	1990	9													Smp_033250	0	0	0.0356166	0.180586	4.40913	0	493.633	564.946	828.756	1.27397
Smp_033260	SC_0199	405590	441181	35.591		1505	1687	2335	2138	348	348	238	306	324	681													Smp_033260	1.44271	1.66488	2.36706	2.19782	2.18359	2.06001	2.07565	2.36898	3.8405	2.74368
Smp_033330	SC_0199	222000	226933	4.933		1229	1100	2221	1573	308	389	85	98	77	776													Smp_033330	8.50011	7.8323	16.2442	11.6665	13.9435	16.6138	5.34843	5.47388	6.5851	22.5568
Smp_033350	Chr_7	4203437	4227052	23.615		2503	2997	3045	2628	346	347	291	354	227	535													Smp_033350	3.61623	4.45766	4.65223	4.07156	3.27206	3.09579	3.82493	4.13043	4.05528	3.24858
Smp_033370	SC_0434	1842	2878	1.036		1199	1193	667	460	144	128	73	63	29	109													Smp_033370	39.486	40.4472	23.2289	16.2451	31.041	26.0303	21.8716	16.7556	11.8092	15.0867
Smp_033380	Chr_7	4112679	4114953	2.274		0	1	2	2	0	0	0	0	0	0													Smp_033380	0	0.0154461	0.0317323	0.0321783	0	0	0	0	0	0
Smp_033400	Chr_7	4058304	4060221	1.917		13163	9013	10230	11194	769	914	492	527	355	993													Smp_033400	234.27	165.141	192.538	213.642	89.5853	100.451	79.6638	75.7476	78.1248	74.277
Smp_033440	Chr_7	3914452	3914508	0.056		0	0	0	0	0	0	0	0	0	0													Smp_033440	0	0	0	0	0	0	0	0	0	0
Smp_033510	Chr_ZW	13438993	13439214	0.221		22	66	54	34	6	7	1	2	7	14													Smp_033510	3.39636	10.4896	8.81584	5.62873	6.06306	6.67322	1.40451	2.49355	13.3625	9.0837
Smp_033530	Chr_ZW	13406839	13410566	3.727		6992	5945	7781	11656	1474	1559	744	736	417	1616													Smp_033530	64.0067	56.0274	75.3248	114.423	88.3224	88.1285	61.9629	54.4125	47.2019	62.174
Smp_033540	Chr_ZW	13352504	13376316	23.812		8706	8321	6962	7614	1162	1303	860	1053	543	1413													Smp_033540	12.474	12.274	10.5487	11.6988	10.8979	11.5286	11.2104	12.1846	9.62026	8.5089
Smp_033550	Chr_1	27348880	27355784	6.904		1887	1897	2131	1206	451	485	619	685	437	470													Smp_033550	9.32513	9.65105	11.1364	6.39102	14.5884	14.8003	27.8297	27.3382	26.7032	9.76167
Smp_033590	Chr_2.unplaced.SC_0108	183420	184862	1.442		480	431	751	727	105	93	56	77	58	164													Smp_033590	11.3569	10.4983	18.7904	18.4456	16.2614	13.5877	12.0543	14.7132	16.9686	16.3082
Smp_033600	Chr_2.unplaced.SC_0108	207200	248374	41.174		2146	3383	3420	2661	448	476	347	507	320	657													Smp_033600	1.77824	2.88594	2.99685	2.36453	2.4299	2.43564	2.61592	3.39285	3.27876	2.28807
Smp_033610	Chr_2.unplaced.SC_0108	257938	271321	13.383		4085	3273	3779	4186	591	619	376	329	234	689													Smp_033610	10.4141	8.59015	10.1879	11.4438	9.86204	9.74466	8.72072	6.77365	7.37641	7.38232
Smp_033620	Chr_2.unplaced.SC_0108	275048	275912	0.864		3900	3336	4524	5086	259	318	198	259	185	580													Smp_033620	154.005	135.619	188.917	215.371	66.9451	77.5431	71.1327	82.5974	90.3319	96.259
Smp_033660	Chr_2.unplaced.SC_0108	407867	411047	3.18		1553	1775	2424	2185	184	250	119	131	146	264													Smp_033660	16.662	19.6056	27.5022	25.139	12.9218	16.5631	11.6155	11.3507	19.3691	11.9043
Smp_033670	Chr_2.unplaced.SC_0108	416800	417912	1.112		10390	9423	10974	9859	955	1017	672	804	553	1464													Smp_033670	318.782	297.641	356.059	324.378	191.792	192.684	187.578	199.219	209.799	188.783
Smp_033680	Chr_2.unplaced.SC_0108	427706	442446	14.74		1791	1901	2057	1961	365	358	164	224	187	673													Smp_033680	4.14555	4.52994	5.03499	4.86748	5.53004	5.117	3.45354	4.18727	5.35214	6.54704
Smp_033700	Chr_2.unplaced.SC_0108	593232	626752	33.52		2490	2824	2267	1717	53	59	80	87	52	91													Smp_033700	2.53442	2.95916	2.44011	1.87409	0.353105	0.370832	0.740805	0.715147	0.654459	0.389282
Smp_033710	Chr_2.unplaced.SC_0108	626781	636350	9.569		12612	14747	10099	7636	1247	1132	1029	1127	732	1478													Smp_033710	44.9677	54.1309	38.078	29.196	29.1026	24.9235	33.3785	32.4517	32.2721	22.148
Smp_033760	Chr_2.unplaced.SC_0108	689387	704197	14.81		10784	15398	9770	6558	821	817	847	818	473	986													Smp_033760	24.8433	36.5189	23.8014	16.2009	12.38	11.6224	17.752	15.2187	13.4738	9.5466
Smp_033770	Chr_2.unplaced.SC_0108	706643	713289	6.646		1384	1584	2324	2083	229	199	133	171	115	383													Smp_033770	7.10492	8.37149	12.6165	11.4671	7.69498	6.30844	6.21169	7.08951	7.29996	8.26353
Smp_033870	Chr_2.unplaced.SC_0108	998538	1003909	5.371		838	1178	1816	1355	432	507	95	137	106	879													Smp_033870	5.3232	7.70368	12.199	9.23013	17.9623	19.8876	5.49018	7.02823	8.32595	23.4672
Smp_033930	SC_2144	589	1227	0.638		20	49	70	44	9	4	7	16	1	9													Smp_033930	1.06953	2.69764	3.95858	2.52322	3.15032	1.3209	3.40561	6.91002	0.661245	2.02278
Smp_033950	Chr_1	23390425	23402989	12.564		3914	5422	7920	6980	893	982	567	650	396	1088													Smp_033950	10.6286	15.1579	22.7436	20.326	15.8729	16.4669	14.0079	14.2549	13.2969	12.4173
Smp_033970	Chr_1	23543890	23565729	21.839		2535	2597	2655	1916	343	390	122	154	136	530													Smp_033970	3.96031	4.17683	4.38626	3.20986	3.50747	3.76237	1.73398	1.94298	2.62718	3.47993
Smp_033990	Chr_1	23606188	23608484	2.296		5329	3940	4624	4610	198	222	107	141	121	291													Smp_033990	79.1876	60.2743	72.6621	73.4603	19.2587	20.3709	14.4654	16.9211	22.2329	18.1739
Smp_034000	Chr_1	23631411	23662787	31.376		2205	3248	4126	2670	577	601	484	454	351	777													Smp_034000	2.3977	3.63602	4.74454	3.11342	4.10687	4.03558	4.78813	3.98693	4.71946	3.551
Smp_034010	Chr_1	23685819	23690872	5.053		260	348	572	532	64	66	17	49	24	63													Smp_034010	1.75553	2.41901	4.08422	3.852	2.82855	2.75185	1.04428	2.67194	2.00376	1.7878
Smp_034020	Chr_1	23693215	23706314	13.099		516	473	1166	1460	87	72	36	34	28	94													Smp_034020	1.34399	1.26833	3.21161	4.07792	1.48325	1.15804	0.853066	0.715189	0.901785	1.029
Smp_034030	Chr_1	23706692	23707076	0.384		13	6	17	21	10	3	3	2	2	27													Smp_034030	1.15504	0.548818	1.59728	2.00084	5.81569	1.64596	2.42498	1.43509	2.19726	10.0823
Smp_034080	Chr_1	23796042	23808144	12.102		92	84	443	393	20	38	15	63	24	61													Smp_034080	0.259367	0.243798	1.32071	1.18812	0.369067	0.66154	0.384727	1.43438	0.836637	0.722769
Smp_034090	Chr_1	23827208	23834924	7.716		682	906	1799	2198	147	213	67	134	63	326													Smp_034090	3.01561	4.12424	8.41204	10.4222	4.25459	5.8159	2.69526	4.78512	3.44454	6.05832
Smp_034100	Chr_1	23848849	23851650	2.801		1449	1594	2060	2253	134	131	81	72	78	300													Smp_034100	17.6498	19.9886	26.5348	29.4287	10.6838	9.85344	8.97615	7.08271	11.748	15.358
Smp_034120	Chr_1	23886875	23897119	10.244		2515	2226	3360	4427	859	905	354	300	191	1242													Smp_034120	8.3763	7.63244	11.834	15.8112	18.7265	18.6127	10.7263	8.06923	7.86587	17.3852
Smp_034160	Chr_2	6266984	6273630	6.646		15	36	21	15	3	1	0	1	0	2													Smp_034160	0.0770042	0.190261	0.114004	0.0825762	0.100808	0.0317007	0	0.0414591	0	0.0431516
Smp_034190	Chr_2	6603612	6612225	8.613		14664	14031	10497	9387	854	841	735	954	624	921													Smp_034190	58.0874	57.2192	43.9717	39.8746	22.143	20.5717	26.4881	30.5193	30.5642	15.3332
Smp_034220	Chr_2	6688023	6692660	4.637		332	433	829	627	89	124	44	63	42	110													Smp_034220	2.44278	3.27989	6.4503	4.94714	4.28633	5.63396	2.94533	3.74355	3.82116	3.4016
Smp_034270	Chr_2	6840411	6858809	18.398		503	807	1339	1357	170	184	90	87	131	322													Smp_034270	0.932784	1.54067	2.62586	2.69857	2.06353	2.10706	1.51841	1.30295	3.00389	2.50965
Smp_034300	Chr_2	7007612	7009507	1.895		11	20	68	62	38	30	13	13	10	36													Smp_034300	0.198046	0.370705	1.29468	1.19703	4.47824	3.33535	2.12938	1.89023	2.22625	2.72408
Smp_034310	Chr_2	7011176	7011704	0.528		16	9	38	60	8	1	1	1	1	5													Smp_034310	1.03388	0.59871	2.59664	4.15758	3.38368	0.399021	0.587874	0.521851	0.799004	1.35789
Smp_034400	Chr_2	7267744	7270744	3		3214	2746	3659	4267	340	342	93	106	79	489													Smp_034400	36.5518	32.1505	44.0051	52.0385	25.3099	24.0179	9.62232	9.73565	11.1094	23.373
Smp_034410	Chr_2	7284464	7292975	8.511		5729	4881	6807	8231	3861	4943	1135	1118	605	4339													Smp_034410	22.9658	20.1436	28.8561	35.3831	101.31	122.36	41.3936	36.1944	29.9887	73.1032
Smp_034420	Chr_2	7321076	7322208	1.132		7565	7622	8241	4076	1453	1907	308	328	401	3483													Smp_034420	228.006	236.5	262.661	131.738	286.65	354.923	84.4544	79.8376	149.445	441.199
Smp_034430	Chr_1	19692460	19695998	3.538		3685	3497	4273	3700	292	273	162	208	119	348													Smp_034430	35.5356	34.7173	43.575	38.262	18.4314	16.2568	14.2127	16.1989	14.1897	14.1042
Smp_034440	Chr_1	19685382	19688247	2.865		238	302	782	337	32	25	3	11	17	66													Smp_034440	2.83424	3.70246	9.84792	4.30357	2.49435	1.83842	0.325024	1.05791	2.50327	3.30329
Smp_034450	Chr_1	19767305	19771495	4.19		1762	2323	2263	2150	274	295	168	261	120	437													Smp_034450	14.3475	19.4735	19.4865	18.7736	14.6039	14.8333	12.4455	17.1635	12.0823	14.9553
Smp_034490	Chr_1	19876821	19886402	9.581		13528	9855	5718	6636	603	627	689	662	358	644													Smp_034490	48.1733	36.1288	21.5326	25.3407	14.0553	13.7875	22.3217	19.0383	15.7636	9.63834
Smp_034500	Chr_1	19904237	19917818	13.581		964	1614	3585	2147	374	524	41	31	18	371													Smp_034500	2.42175	4.17426	9.52401	5.78394	6.14996	8.12885	0.937066	0.628941	0.559144	3.91714
Smp_034530	Chr_1	20078234	20080251	2.017		1955	1518	2014	2907	257	201	171	274	104	162													Smp_034530	33.0693	26.4347	36.026	52.7306	28.4551	20.9952	26.3153	37.4304	21.7526	11.5169
Smp_034550	Chr_1	20094419	20135089	40.67		2939	3027	3531	3285	1923	2125	146	165	87	3312													Smp_034550	2.46552	2.61424	3.13246	2.95519	10.5594	11.0081	1.11429	1.11787	0.90246	11.6773
Smp_034580	Chr_1	20280157	20284705	4.548		0	0	1	0	0	0	0	0	0	0													Smp_034580	0	0	0.00793308	0	0	0	0	0	0	0
Smp_034610	Chr_1	20369315	20374317	5.002		135	143	253	127	17	17	3	5	4	13													Smp_034610	0.920818	1.00415	1.8249	0.928932	0.758993	0.716036	0.186164	0.275427	0.337364	0.372672
Smp_034660	Chr_1	20655109	20661205	6.096		1476	1851	3423	2106	348	428	139	146	152	415													Smp_034660	8.26086	10.6652	20.2593	12.6397	12.7487	14.792	7.07763	6.59915	10.5192	9.76181
Smp_034670	Chr_1	20690297	20706951	16.654		2487	2773	3252	2519	361	397	360	385	195	411													Smp_034670	5.09496	5.84843	7.04521	5.53393	4.84085	5.02229	6.70968	6.36975	4.93968	3.53875
Smp_034680	Chr_1	20708598	20722479	13.881		62	60	52	53	1	3	13	6	26	0													Smp_034680	0.152389	0.151823	0.135159	0.139694	0.0160884	0.0455334	0.290697	0.1191	0.790197	0
Smp_034700	Chr_1	20876534	20886821	10.287		2805	2500	2512	2116	308	299	275	307	172	401													Smp_034700	9.3031	8.5361	8.81035	7.52576	6.68643	6.12367	8.29778	8.22299	7.05379	5.58963
Smp_034840	Chr_1	15565019	15566762	1.743		70203	56156	77207	62096	15446	15415	3973	4355	2726	17614													Smp_034840	1374.17	1131.64	1598.16	1303.44	1979.02	1863.27	707.521	688.448	659.799	1449.06
Smp_034850	Chr_1	15538397	15547834	9.437		1077	771	1838	1560	530	727	49	85	33	965													Smp_034850	3.89373	2.86965	7.02706	6.04804	12.5422	16.2304	1.61169	2.48179	1.47524	14.6629
Smp_034860	Chr_1	15490317	15522363	32.046		1	39	394	252	4	1	1	1	0	0													Smp_034860	0.00106466	0.0427463	0.443593	0.287707	0.0278752	0.00657439	0.009686	0.00859818	0	0
Smp_034870	Chr_1	15468061	15487734	19.673		11725	16517	12850	7027	2398	2428	962	1073	717	3112													Smp_034870	20.3341	29.4896	23.5665	13.0684	27.2214	26.0021	15.1783	15.0283	15.3756	22.6828
Smp_034920	Chr_1	15249014	15320657	71.643		104	111	227	188	30	26	10	31	24	87													Smp_034920	0.0495271	0.0544198	0.114318	0.0960081	0.0935147	0.0764591	0.0433256	0.119225	0.141325	0.17413
Smp_034940	Chr_1	15214373	15234216	19.843		1709	2429	3941	3378	1322	1392	539	631	614	2643													Smp_034940	2.93845	4.2996	7.16574	6.22839	14.8784	14.7796	8.4314	8.76198	13.054	19.0993
Smp_034980	Chr_1	15009829	15025110	15.281		4239	5326	4333	4108	745	509	513	602	381	1236													Smp_034980	9.46445	12.2421	10.2306	9.83563	10.8877	7.01771	10.4204	10.8549	10.5186	11.5983
Smp_035000	Chr_1	14979746	14981609	1.863		467	371	518	615	18	27	54	45	29	61													Smp_035000	8.55239	6.9947	10.0318	12.0777	2.15771	3.05338	8.99703	6.65549	6.56702	4.69509
Smp_035010	Chr_1	14975348	14979145	3.797		863	693	1416	1166	678	470	554	657	155	315													Smp_035010	7.7545	6.41063	13.455	11.2352	39.8769	26.0788	45.2884	47.6766	17.2216	11.8959
Smp_035020	Chr_1	14957585	14973848	16.263		1124	1324	1748	1886	413	519	286	287	164	568													Smp_035020	2.35803	2.85953	3.87796	4.24292	5.67129	6.72351	5.45863	4.86252	4.25428	5.00812
Smp_035030	Chr_1	14932035	14944812	12.777		14711	21293	16518	17139	1952	1641	1107	1399	761	2655													Smp_035030	39.2823	58.535	46.6435	49.0773	34.118	27.0588	26.8929	30.1696	25.1269	29.7963
Smp_035040	Chr_1	14898658	14927711	29.053		134	54	130	67	22	41	5	2	7	32													Smp_035040	0.157361	0.0652846	0.161441	0.0843738	0.169108	0.297319	0.0534192	0.0189679	0.101646	0.157938
Smp_035080	Chr_1	14841403	14847222	5.819		271	351	717	791	67	69	90	133	65	106													Smp_035080	1.58893	2.11869	4.44563	4.97338	2.57134	2.49822	4.80079	6.29772	4.71246	2.61207
Smp_035090	Chr_1	14808153	14826842	18.689		1200	1836	2863	2712	459	417	379	473	303	491													Smp_035090	2.19068	3.4506	5.5271	5.30918	5.48478	4.70088	6.29465	6.97357	6.83974	3.76723
Smp_035110	Chr_1	14747751	14757766	10.015		1487	1483	2472	2396	578	679	137	138	179	810													Smp_035110	5.06575	5.20114	8.90553	8.75305	12.8887	14.284	4.24608	3.79672	7.54024	11.5974
Smp_035120	Chr_1	14693813	14694250	0.437		6	23	26	22	14	12	1	0	0	8													Smp_035120	0.468439	1.84865	2.14661	1.8419	7.1545	5.78535	0.710292	0	0	2.62504
Smp_035140	Chr_1	14647193	14656191	8.998		223	352	705	366	102	121	10	4	11	159													Smp_035140	0.845556	1.37406	2.82687	1.48819	2.53155	2.83315	0.344963	0.122488	0.515739	2.53383
Smp_035150	Chr_1	14638116	14642665	4.549		1277	1133	1643	2358	440	425	238	238	220	664													Smp_035150	9.57764	8.74827	13.0312	18.9649	21.6008	19.6835	16.2397	14.4159	20.4028	20.9305
Smp_035160	Chr_1	14625098	14626201	1.103		135	168	199	30	37	17	0	5	8	67													Smp_035160	4.17582	5.34985	6.50938	0.995106	7.49133	3.24715	0	1.24904	3.05983	8.71016
Smp_035180	Chr_1	14571900	14607467	35.567		81	91	180	72	33	28	2	2	2	43													Smp_035180	0.0777001	0.0898674	0.182594	0.0740643	0.207205	0.165859	0.0174542	0.015494	0.0237228	0.17336
Smp_035190	Chr_1	14481008	14523591	42.583		1168	1492	3627	4643	577	622	281	277	205	1239													Smp_035190	0.935815	1.23067	3.07308	3.9892	3.02602	3.0774	2.04827	1.79235	2.03096	4.17217
Smp_035200	Chr_1	14470305	14471813	1.508		113284	98503	83316	68793	15843	10947	6697	8837	3469	11357													Smp_035200	2563.01	2294.33	1993.38	1669.04	2346.22	1529.41	1378.47	1614.67	970.478	1079.91
Smp_035210	Chr_1	14422886	14455405	32.519		9038	11453	9881	4314	3192	2947	182	216	132	5893													Smp_035210	9.48241	12.3706	10.9629	4.85363	21.9209	19.0929	1.73721	1.83019	1.71246	25.9852
Smp_035220	Chr_1	14407060	14419041	11.981		126	97	147	168	64	102	9	13	11	146													Smp_035220	0.358807	0.284372	0.442677	0.513027	1.19294	1.79365	0.233167	0.298972	0.387331	1.74738
Smp_035250	Chr_1	14392863	14396116	3.253		26	23	48	92	3	25	9	5	2	26													Smp_035250	0.272692	0.248343	0.532377	1.03473	0.205954	1.61914	0.858769	0.423512	0.259375	1.14608
Smp_035260	Chr_1	14353179	14387229	34.05		2335	2614	3524	3644	1412	1434	115	186	115	1826													Smp_035260	2.33966	2.69648	3.73406	3.91548	9.26084	8.87282	1.04833	1.50514	1.42483	7.68972
Smp_035270	Chr_1	14350091	14351427	1.336		16740	15123	11381	9296	1348	1541	1460	1007	686	1769													Smp_035270	427.497	397.594	307.352	254.574	225.328	243.011	339.207	207.684	216.621	189.867
Smp_035280	Chr_1	14322957	14340997	18.04		2734	2375	2813	4124	217	279	216	280	170	304													Smp_035280	5.17066	4.62418	5.62594	8.36384	2.68631	3.25835	3.71651	4.27663	3.97553	2.41637
Smp_035290	Chr_1	14309800	14322228	12.428		40	40	34	48	62	66	21	19	10	79													Smp_035290	0.10981	0.113049	0.0987052	0.141307	1.1141	1.11885	0.524489	0.421243	0.339455	0.911492
Smp_035300	Chr_1	14295236	14304111	8.875		2615	2692	2497	1992	242	284	271	359	340	555													Smp_035300	10.0528	10.654	10.1511	8.21192	6.08947	6.74186	9.47805	11.1457	16.1619	8.96709
Smp_035310	Chr_1	14284878	14291249	6.371		7774	9434	7386	7458	1512	1559	1182	1201	919	1937													Smp_035310	41.6314	52.0111	41.8277	42.8291	53.0001	51.5547	57.5875	51.9416	60.8542	43.5962
Smp_035360	Chr_1	14215900	14224614	8.714		1020	1097	1062	1017	187	205	99	121	125	272													Smp_035360	3.99362	4.42178	4.39713	4.26999	4.79244	4.95639	3.52643	3.82603	6.05167	4.47588
Smp_035370	Chr_1	14193421	14204012	10.591		14	21	42	43	12	13	1	1	1	18													Smp_035370	0.0450998	0.0696451	0.143079	0.148544	0.253033	0.258604	0.0293077	0.0260162	0.0398333	0.243704
Smp_035380	Chr_1	14187931	14193281	5.35		8	15	25	10	5	5	0	5	1	12													Smp_035380	0.0510176	0.0984794	0.168596	0.0683864	0.208713	0.1969	0	0.257511	0.078855	0.321629
Smp_035390	Chr_1	14167398	14182614	15.216		1355	1808	2347	1912	319	365	177	179	186	448													Smp_035390	3.03824	4.17355	5.56512	4.59739	4.68191	5.05384	3.6107	3.2414	5.15698	4.22187
Smp_035410	Chr_1	14138619	14155079	16.46		6029	6054	3954	2951	272	324	229	277	209	401													Smp_035410	12.4968	12.9188	8.667	6.55938	3.69038	4.1471	4.31841	4.63693	5.35673	3.49335
Smp_035430	Chr_1	14093547	14104168	10.621		9352	11344	11201	8608	1204	1349	615	777	598	2161													Smp_035430	30.0416	37.5153	38.0499	29.6524	25.3159	26.7594	17.9733	20.1575	23.753	29.1754
Smp_035460	Chr_1	13893166	13922762	29.596		338	275	650	994	64	66	43	42	40	104													Smp_035460	0.389643	0.326368	0.792396	1.22879	0.482925	0.46983	0.450976	0.391018	0.570177	0.50388
Smp_035470	Chr_1	13864554	13869810	5.256		8884	10621	10354	8965	980	899	1295	1497	871	1188													Smp_035470	57.6683	70.9771	71.0747	62.4049	41.6393	36.0358	76.4773	78.4778	69.911	32.4107
Smp_035480	Chr_1	13853692	13858017	4.325		1524	1401	2183	3766	466	501	438	455	294	607													Smp_035480	12.0222	11.3778	18.2108	31.858	24.062	24.4051	31.4345	28.9872	28.6777	20.1247
Smp_035500	Chr_1	13818843	13819608	0.765		137	96	187	117	42	89	10	23	7	72													Smp_035500	6.11002	4.40776	8.81947	5.59562	12.2608	24.5108	4.05748	8.28413	3.86029	13.4958
Smp_035540	Chr_1	13035691	13037493	1.802		450	528	973	979	142	158	83	85	61	221													Smp_035540	8.52003	10.2917	19.4814	19.877	17.5981	18.4728	14.2969	12.997	14.281	17.5859
Smp_035550	Chr_1	13057311	13060850	3.539		107	73	64	59	22	7	8	5	3	11													Smp_035550	1.03154	0.72452	0.652472	0.609951	1.38827	0.416723	0.701661	0.389287	0.357622	0.445696
Smp_035560	Chr_1	13068564	13071314	2.75		2080	3968	5949	3683	1092	1517	968	835	708	1174													Smp_035560	25.8056	50.6812	78.0501	48.9996	88.6794	116.22	109.26	83.6631	108.613	61.2157
Smp_035580	Chr_1	13151075	13172898	21.823		4175	4277	7409	7614	887	1036	368	512	406	1643													Smp_035580	6.52718	6.88387	12.2492	12.765	9.07699	10.0017	5.23421	6.46451	7.84864	10.7957
Smp_035620	Chr_1	13298131	13313069	14.938		1989	1598	1568	1495	238	256	156	185	121	311													Smp_035620	4.54282	3.75744	3.78718	3.66161	3.55809	3.61058	3.24153	3.4124	3.41724	2.98535
Smp_035640	Chr_1	13421008	13426758	5.75		0	0	0	0	1	0	0	0	0	0													Smp_035640	0	0	0	0	0.0388387	0	0	0	0	0
Smp_035650	Chr_1	13441984	13460010	18.026		29	30	135	99	5	3	0	1	1	27													Smp_035650	0.0548886	0.0584561	0.270207	0.200937	0.0619446	0.0350632	0	0.0152855	0.0234036	0.214779
Smp_035700	Chr_1	13633029	13645422	12.393		6196	7710	8376	7163	124	75	29	37	25	127													Smp_035700	17.0576	21.8517	24.385	21.1467	2.23449	1.27501	0.72634	0.822632	0.851033	1.46945
Smp_035730	Chr_4	29430290	29432952	2.662		1799	1493	1451	1693	114	166	92	119	79	168													Smp_035730	23.0572	19.6997	19.6663	23.2687	9.56378	13.138	10.7275	12.3174	12.5199	9.04958
Smp_035790	Chr_6	11726602	11727044	0.442		18254	14296	15415	22118	824	813	1303	1466	1623	1946													Smp_035790	1409.03	1136.06	1258.3	1830.83	416.33	387.523	915.04	913.886	1549.1	631.317
Smp_035800	Chr_6	11707371	11707777	0.406		20241	12577	17547	19878	1506	1293	2299	2926	1168	1818													Smp_035800	1700.94	1088.08	1559.33	1791.31	828.384	670.968	1757.64	1985.77	1213.67	642.089
Smp_035870	Chr_6	12611979	12612812	0.833		6	9	16	1	8	4	0	0	5	18													Smp_035870	0.245748	0.379494	0.693006	0.0439217	2.14475	1.01168	0	0	2.53226	3.09852
Smp_035930	Chr_6	12837304	12850583	13.279		49	60	108	119	17	36	3	13	6	90													Smp_035930	0.125897	0.158706	0.293441	0.327873	0.285901	0.571172	0.0701252	0.269748	0.19062	0.971861
Smp_036010	Chr_4	7798	17177	9.379		273	398	875	641	139	134	94	83	58	215													Smp_036010	0.993093	1.49051	3.366	2.50049	3.30972	3.01008	3.11092	2.43838	2.60888	3.28707
Smp_036020	Chr_4	39835	117044	77.209		890	2426	1623	905	29	39	3	8	12	34													Smp_036020	0.393283	1.10365	0.758425	0.428849	0.0838808	0.106421	0.0120607	0.0285497	0.0655687	0.0631449
Smp_036060	Chr_4	243160	246851	3.691		3535	3793	5002	4150	459	530	285	386	231	716													Smp_036060	32.676	36.095	48.8947	41.1365	27.7716	30.2525	23.9673	28.8153	26.4029	27.8161
Smp_036090	Chr_4	308647	325039	16.392		1342	1689	2627	2919	289	268	180	239	174	443													Smp_036090	2.79321	3.61914	5.78216	6.51517	3.9373	3.44455	3.40846	4.01741	4.47817	3.87524
Smp_036130	Chr_4	410654	418336	7.682		4504	4226	6674	7244	795	828	311	469	360	1236													Smp_036130	20.0036	19.3225	31.3454	34.5007	23.1114	22.7083	12.5662	16.822	19.7702	23.0713
Smp_036180	Chr_1	34897400	34929330	31.93		1379	1729	2823	2850	524	531	276	274	103	534													Smp_036180	1.4735	1.90197	3.18988	3.26565	3.66492	3.50369	2.68305	2.36446	1.36088	2.39811
Smp_036220	Chr_1	34980248	34980698	0.45		15003	9253	14970	14435	1481	1938	1100	1068	572	1797													Smp_036220	1137.49	722.234	1200.25	1173.62	734.979	907.342	758.749	653.942	536.249	572.615
Smp_036250	Chr_1	35091309	35097173	5.864		2295	2768	2600	1782	208	322	290	359	338	616													Smp_036250	13.3528	16.5798	15.9971	11.1183	7.9214	11.5689	15.3505	16.8687	24.3168	15.0631
Smp_036270	Chr_1	35120178	35121843	1.665		57172	58067	41224	31952	4028	3445	2621	3021	1451	3804													Smp_036270	1171.53	1224.96	893.302	702.114	540.266	435.918	488.62	499.939	367.651	327.607
Smp_036370	Chr_6	6093896	6102559	8.663		2104	2357	2871	2077	477	515	205	271	147	584													Smp_036370	8.28631	9.55651	11.9571	8.77186	12.2965	12.5247	7.3452	8.61948	7.15866	9.66655
Smp_036390	Chr_6	6053137	6058365	5.228		2500	2519	2296	2734	238	287	165	200	165	472													Smp_036390	16.315	16.9239	15.8452	19.1332	10.1666	11.5658	9.7964	10.5408	13.3147	12.9459
Smp_036400	Chr_6	6048576	6053362	4.786		9896	8719	6178	5908	450	582	341	389	463	1161													Smp_036400	70.5457	63.9885	46.5733	45.1639	20.9977	25.62	22.1157	22.3953	40.8123	34.7846
Smp_036470	Chr_ZW	11559354	11565019	5.665		61	68	66	112	6	6	0	0	0	2													Smp_036470	0.367378	0.421616	0.420345	0.723339	0.236529	0.223142	0	0	0	0.0506241
Smp_036500	Chr_ZW	11703125	11722949	19.824		1634	2157	2131	1831	468	485	185	194	171	1000													Smp_036500	2.81219	3.82179	3.87842	3.37925	5.27214	5.15442	2.89667	2.69644	3.63905	7.23329
Smp_036550	Chr_ZW	11855599	11863239	7.64		1636	1440	1092	901	281	330	72	123	63	567													Smp_036550	7.3059	6.62029	5.15693	4.31475	8.21383	9.10018	2.92521	4.436	3.47881	10.6418
Smp_036570	Chr_ZW	11967791	11971840	4.049		271	326	215	183	68	89	43	40	9	55													Smp_036570	2.28352	2.82799	1.91581	1.65359	3.75054	4.63097	3.29639	2.72203	0.93773	1.94779
Smp_036590	Chr_ZW	12006412	12012189	5.777		13092	16198	10794	8342	1552	1822	719	735	581	2385													Smp_036590	77.3192	98.4843	67.4128	52.8313	59.996	66.447	38.6318	35.0562	42.4284	59.1988
Smp_036630	Chr_ZW	12085514	12098116	12.602		1127	1141	772	1184	101	131	58	85	28	134													Smp_036630	3.05118	3.1802	2.21024	3.43745	1.78984	2.19009	1.42859	1.85849	0.937349	1.52473
Smp_036660	Chr_ZW	12122648	12125911	3.263		113	71	107	218	8	30	29	24	29	43													Smp_036660	1.18153	0.764274	1.18312	2.44435	0.547527	1.93702	2.75867	2.02663	3.74942	1.88964
Smp_036670	Chr_ZW	12126204	12128979	2.775		70	42	82	74	0	1	0	0	0	0													Smp_036670	0.860634	0.531611	1.06614	0.975646	0	0.0759218	0	0	0	0
Smp_036720	Chr_6	9226116	9239828	13.712		73	57	69	28	6	10	4	2	2	7													Smp_036720	0.181638	0.14601	0.181556	0.0747104	0.0977199	0.153649	0.0905477	0.0401892	0.0615336	0.0732022
Smp_036760	Chr_6	9021280	9048874	27.594		167	196	346	193	126	138	52	29	18	35													Smp_036760	0.206484	0.249488	0.452401	0.255898	1.01974	1.05364	0.584934	0.289577	0.275195	0.181878
Smp_036780	Chr_6	8887728	8888071	0.343		1375	945	1659	1686	93	110	46	84	68	297													Smp_036780	136.77	96.7711	174.508	179.84	60.551	67.566	41.6276	67.4785	83.6369	124.162
Smp_036920	SC_0222	268005	268638	0.633		1946	1704	2328	2719	102	134	66	84	71	185													Smp_036920	104.887	94.5527	132.691	157.155	35.9856	44.5996	32.3637	36.5642	47.3192	41.9078
Smp_036930	SC_0222	276649	300522	23.873		515	696	1356	994	184	193	96	146	91	246													Smp_036930	0.73601	1.02402	2.04934	1.52336	1.72125	1.70326	1.24819	1.6851	1.60812	1.47759
Smp_036940	SC_0222	313802	314124	0.322		6880	4778	5579	5988	348	442	507	490	290	395													Smp_036940	728.981	521.193	625.119	680.377	241.355	289.198	488.731	419.296	379.949	175.901
Smp_036950	SC_0222	323126	325127	2.001		4678	5142	5534	5567	607	656	451	616	365	847													Smp_036950	79.7621	90.2595	99.7825	101.788	67.7445	69.0695	69.9596	84.823	76.9536	60.6965
Smp_036980	Chr_1.unplaced.SC_0094	59622	64631	5.009		403	459	661	567	29	49	22	28	16	31													Smp_036980	2.74497	3.21862	4.76116	4.14148	1.29294	2.06098	1.36329	1.54024	1.34757	0.887437
Smp_036990	Chr_1.unplaced.SC_0094	69749	123741	53.992		922	1048	1752	902	671	919	334	383	275	1082													Smp_036990	0.58262	0.681773	1.17076	0.611225	2.7754	3.58604	1.92015	1.95456	2.14875	2.87359
Smp_037020	Chr_1.unplaced.SC_0094	270262	270534	0.272		191	406	204	76	50	52	58	51	22	78													Smp_037020	23.9579	52.4282	27.0597	10.2228	41.0519	40.2776	66.1877	51.6632	34.1222	41.12
Smp_037120	Chr_ZW	15731783	15740005	8.222		3713	2669	1898	2351	241	263	101	86	72	555													Smp_037120	15.4075	11.4019	8.32877	10.4616	6.54594	6.73919	3.81296	2.88205	3.69435	9.67927
Smp_037190	Chr_ZW	15548800	15551676	2.876		2158	1628	927	1395	176	270	69	83	30	271													Smp_037190	25.6004	19.8826	11.6293	17.7463	13.6665	19.779	7.44695	7.95187	4.40063	13.5116
Smp_037200	Chr_ZW	15541091	15543369	2.278		1599	1805	956	1046	172	158	104	108	86	248													Smp_037200	23.9485	27.8312	15.1414	16.7997	16.8619	14.6128	14.1709	13.0632	15.9268	15.6108
Smp_037210	SC_0041	241180	264946	23.766		648	540	1260	1637	70	128	49	38	53	160													Smp_037210	0.930256	0.798079	1.91283	2.52009	0.657771	1.13471	0.639968	0.440563	0.940812	0.965364
Smp_037230	SC_0041	168293	182361	14.068		9780	11350	14852	9173	4591	5083	419	595	366	7002													Smp_037230	23.7187	28.3381	38.0903	23.8563	72.8799	76.1232	9.24485	11.6537	10.9757	71.3702
Smp_037290	Chr_1.unplaced.SC_0034	832355	847736	15.381		1780	1457	2342	2542	195	218	167	177	141	291													Smp_037290	3.94838	3.32723	5.49369	6.04665	2.83128	2.98608	3.37016	3.1708	3.86739	2.71291
Smp_037380	Chr_ZW	47458919	47460073	1.154		1203	1344	1341	1660	185	199	112	155	143	230													Smp_037380	35.5667	40.9074	41.9262	52.6291	35.8013	36.331	30.1252	37.0089	52.2773	28.5791
Smp_037400	Chr_ZW	47476682	47491661	14.979		912	1045	1747	1629	205	205	130	186	94	269													Smp_037400	2.07728	2.45043	4.20797	3.97889	3.05635	2.88337	2.69388	3.42145	2.64745	2.57511
Smp_037430	Chr_2.unplaced.SC_0213	33322	34555	1.233		0	0	0	0	0	0	21	15	10	0													Smp_037430	0	0	0	0	0	0	5.28657	3.35203	3.42153	0
Smp_037460	Chr_2	4411944	4425005	13.061		2998	2926	3711	3492	240	216	230	274	167	443													Smp_037460	7.83139	7.86875	10.2512	9.78186	4.10362	3.48423	5.466	5.78035	5.39415	4.86356
Smp_037510	Chr_2	4599205	4599522	0.317		37	23	46	56	3	4	0	1	0	13													Smp_037510	3.98223	2.54845	5.23553	6.46327	2.11346	2.65846	0	0.869203	0	5.88046
Smp_037530	Chr_2	4685595	4687264	1.669		2330	1613	2287	3006	140	232	117	146	118	312													Smp_037530	47.6303	33.9458	49.4393	65.8956	18.7329	29.2861	21.7594	24.1033	29.8269	26.8056
Smp_037540	Chr_2	4707606	4714439	6.833		12520	13801	11815	11005	2390	2075	2816	2943	1796	2540													Smp_037540	62.5139	70.9426	62.3856	58.9254	78.1122	63.9788	127.92	118.675	110.886	53.3027
Smp_037590	Chr_2	4908879	4924440	15.561		4646	7726	6446	3299	335	339	361	402	306	425													Smp_037590	10.1865	17.4391	14.9457	7.75655	4.80773	4.58978	7.20092	7.11818	8.29596	3.91632
Smp_037610	Chr_2	4967655	4978773	11.118		3	9	13	2	3	0	0	0	0	2													Smp_037610	0.00920615	0.0284331	0.042187	0.00658153	0.0602597	0	0	0	0	0.0257947
Smp_037640	Chr_2	5050800	5105574	54.774		894	951	1346	1012	321	399	154	231	152	363													Smp_037640	0.556861	0.609837	0.88661	0.675974	1.30877	1.53472	0.872699	1.16203	1.17072	0.950297
Smp_037690	SC_0136	589756	590749	0.993		0	0	3	2	15	13	1	0	0	1													Smp_037690	0	0	0.109002	0.0736893	3.37345	2.75819	0.312586	0	0	0.144404
Smp_037700	SC_0136	604105	606602	2.497		16847	11410	5842	5914	1292	1693	645	793	336	1405													Smp_037700	230.191	160.5	84.4122	86.6536	115.552	142.846	80.1788	87.5054	56.768	80.6835
Smp_037720	Chr_1	33748352	33749108	0.756		24	33	59	50	29	32	47	58	46	47													Smp_037720	1.08311	1.5332	2.81574	2.41976	8.56661	8.9178	19.2972	21.1391	25.6696	8.91463
Smp_037780	Chr_1	33959206	33960952	1.746		2893	2225	2693	2584	798	902	121	180	107	989													Smp_037780	56.5311	44.7604	55.6486	54.1467	102.068	108.841	21.5109	28.4059	25.8537	81.223
Smp_037860	Chr_1	34463154	34475587	12.433		4388	4045	7367	6970	911	838	150	185	177	1401													Smp_037860	12.0413	11.4275	21.3785	20.5107	16.3635	14.2003	3.74484	4.09993	6.00593	16.1581
Smp_037900	Chr_1	34609180	34618714	9.534		399	445	736	708	67	84	26	29	42	81													Smp_037900	1.42785	1.63943	2.78525	2.71695	1.56939	1.85624	0.846479	0.838114	1.85848	1.21825
Smp_037910	Chr_1	34629971	34637657	7.686		8947	7381	6848	6330	460	539	275	355	305	1137													Smp_037910	39.7156	33.7305	32.1459	30.1319	13.3656	14.7747	11.1058	12.7265	16.741	21.2123
Smp_037930	Chr_ZW	43541910	43543181	1.271		1969	1356	2573	3572	216	218	156	208	94	314													Smp_037930	52.8547	37.4733	73.0393	102.823	37.9525	36.136	38.0976	45.0918	31.2008	35.4251
Smp_037960	Chr_ZW	43468457	43483199	14.742		766	1006	1546	1000	209	256	28	41	28	373													Smp_037960	1.77278	2.3969	3.78369	2.4818	3.16608	3.65858	0.589549	0.766316	0.80128	3.6281
Smp_038030	Chr_ZW	43231486	43248103	16.617		1682	1800	2038	2145	334	362	1734	1506	1116	442													Smp_038030	3.45348	3.80477	4.42501	4.72279	4.48876	4.58971	32.3903	24.972	28.3331	3.81414
Smp_038080	Chr_4	30318732	30342034	23.302		5645	9161	7334	4516	1199	1012	815	1091	728	1466													Smp_038080	8.26522	13.8089	11.3556	7.09062	11.491	9.14991	10.8563	12.9007	13.1802	9.02127
Smp_038100	Chr_4	30392084	30394052	1.968		65140	66819	42454	31917	3661	3069	2639	2984	1933	5221													Smp_038100	1129.29	1192.57	778.316	593.363	415.439	328.55	416.229	417.786	414.371	380.413
Smp_038140	Chr_ZW	53032845	53050752	17.907		473	440	989	1013	184	234	134	151	110	467													Smp_038140	0.901202	0.863054	1.99267	2.06971	2.29471	2.7531	2.32274	2.32346	2.59151	3.73957
Smp_038210	Chr_ZW	2096296	2105179	8.883		3496	3989	4145	3342	762	991	519	570	362	1360													Smp_038210	13.4275	15.7729	16.8355	13.7648	19.157	23.5041	18.1353	17.6805	17.1922	21.9536
Smp_038240	Chr_ZW	2142239	2167221	24.982		3196	3909	3751	2441	314	283	373	445	274	406													Smp_038240	4.36479	5.496	5.41729	3.5749	2.80695	2.38665	4.63447	4.9081	4.62707	2.33038
Smp_038300	Chr_ZW	2351997	2354985	2.988		3932	2464	2703	3735	336	316	314	386	148	278													Smp_038300	44.8969	28.9646	32.6383	45.7334	25.1126	22.2811	32.6187	35.5948	20.896	13.3411
Smp_038330	Chr_ZW	2436586	2438772	2.186		713	807	1317	1128	132	138	63	91	82	166													Smp_038330	11.1282	12.9668	21.7369	18.8792	13.4852	13.3002	8.94558	11.4702	15.8251	10.8889
Smp_038340	Chr_ZW	2442266	2478915	36.649		2521	2493	2920	3391	413	422	169	183	183	795													Smp_038340	2.3469	2.38929	2.87464	3.38524	2.51664	2.42594	1.43134	1.37584	2.10655	3.11051
Smp_038410	Chr_ZW	2585189	2585659	0.47		258	232	181	155	39	47	31	37	18	83													Smp_038410	18.7286	17.338	13.8945	12.0658	18.531	21.0683	20.473	21.6912	16.1569	25.3225
Smp_038420	Chr_ZW	2586348	2599957	13.609		1202	1213	1369	1229	205	234	202	203	105	182													Smp_038420	3.01344	3.13071	3.62944	3.30407	3.36403	3.62259	4.60727	4.11008	3.25496	1.91766
Smp_038430	Chr_ZW	2600104	2601891	1.787		500	553	590	579	49	22	31	32	13	65													Smp_038430	9.54617	10.8695	11.9121	11.8543	6.12356	2.59375	5.38462	4.93407	3.06903	5.21574
Smp_038440	Chr_ZW	2606415	2641845	35.43		711	539	1256	1118	374	346	32	27	23	519													Smp_038440	0.684671	0.53435	1.27903	1.1545	2.3574	2.05747	0.280348	0.209978	0.273867	2.1005
Smp_038510	Chr_ZW	26129665	26130661	0.996		81199	59487	35114	37495	3463	2461	3049	2433	2110	5071													Smp_038510	2781.47	2097.83	1271.99	1377.33	776.472	520.573	950.203	673.074	893.729	730.065
Smp_038530	Chr_ZW	30762793	30764253	1.46		281	408	535	473	460	533	44	63	53	874													Smp_038530	6.56655	9.81556	13.221	11.8531	70.3619	76.9137	9.35444	11.8896	15.3146	85.8392
Smp_038540	Chr_ZW	30716599	30717633	1.034		1285	1322	660	778	248	333	95	108	94	235													Smp_038540	42.4	44.9075	23.0296	27.5285	53.5629	67.8505	28.5181	28.7795	38.3522	32.5893
Smp_038560	Chr_ZW	30638962	30639868	0.906		34002	29607	17454	21797	3279	3243	1369	1330	1081	4675													Smp_038560	1280.44	1147.82	695.071	880.222	808.25	754.134	469.022	404.486	503.362	739.913
Smp_038630	Chr_4	5376531	5377308	0.777		990	827	853	1028	136	157	110	95	34	99													Smp_038630	43.4708	37.3846	39.6087	48.4056	39.0886	42.5704	43.943	33.6886	18.4604	18.2701
Smp_038640	Chr_4	5355206	5376392	21.186		1198	1769	1926	1722	450	388	198	246	200	664													Smp_038640	1.92926	2.93283	3.27997	2.97377	4.74347	3.85844	2.90091	3.19938	3.98258	4.49414
Smp_038680	Chr_4	5146347	5152952	6.605		6611	4513	4872	6358	232	162	228	328	40	256													Smp_038680	34.149	23.9994	26.6132	35.2185	7.84418	5.1674	10.7147	13.683	2.55488	5.55769
Smp_038700	Chr_4	5084203	5091722	7.519		1845	2304	2185	2553	502	679	240	323	272	845													Smp_038700	8.37182	10.7629	10.4846	12.4227	14.91	19.0256	9.90762	11.8365	15.2613	16.1148
Smp_038710	Chr_4	5065367	5084006	18.639		1959	1614	2949	3275	230	230	131	168	87	225													Smp_038710	3.58588	3.04151	5.7084	6.42854	2.75574	2.59977	2.18156	2.48352	1.96915	1.73096
Smp_038730	Chr_4	5009937	5031647	21.71		847	1445	2290	834	4795	4032	628	501	451	4685													Smp_038730	1.33109	2.33785	3.80573	1.4055	49.3244	39.1282	8.97879	6.35855	8.76395	30.944
Smp_038820	Chr_1.unplaced.SC_0034	217470	221946	4.476		796	1072	1434	1541	108	131	46	59	68	152													Smp_038820	6.06746	8.41226	11.559	12.5961	5.38848	6.1661	3.18996	3.63197	6.40917	4.86946
Smp_038830	Chr_1.unplaced.SC_0034	179590	198546	18.956		1043	1484	1266	574	228	268	103	174	60	366													Smp_038830	1.87725	2.74976	2.40962	1.10787	2.68609	2.97864	1.68659	2.5292	1.33533	2.76861
Smp_038840	Chr_1.unplaced.SC_0034	159561	167070	7.509		1270	1202	1441	1513	99	145	81	107	76	244													Smp_038840	5.77039	5.62251	6.92379	7.37192	2.94432	4.06832	3.34827	3.92629	4.26987	4.65945
Smp_038870	Chr_1.unplaced.SC_0034	49014	78383	29.369		3041	5039	4875	2341	732	658	417	504	378	1136													Smp_038870	3.53273	6.02647	5.98891	2.91633	5.56614	4.72026	4.40722	4.72848	5.42982	5.54646
Smp_038920	Chr_ZW	43700133	43700459	0.326		0	0	0	0	0	0	0	0	0	0													Smp_038920	0	0	0	0	0	0	0	0	0	0
Smp_038930	Chr_ZW	43682068	43696897	14.829		4338	5520	4824	5147	559	508	408	455	315	749													Smp_038930	9.98071	13.0748	11.737	12.6989	8.41846	7.21741	8.54017	8.45434	8.96152	7.24264
Smp_038940	Chr_ZW	43674917	43681910	6.993		2963	3404	2823	2496	144	148	97	129	153	282													Smp_038940	14.4561	17.0976	14.565	13.0588	4.59866	4.4589	4.30553	5.08284	9.23019	5.78246
Smp_038950	Chr_ZW	43664187	43665915	1.728		57379	48245	43038	38912	6262	6808	3199	2964	1788	7982													Smp_038950	1132.9	980.656	898.609	823.879	809.286	830.052	574.63	472.623	436.523	662.361
Smp_038960	Chr_ZW	43636759	43638205	1.446		42466	38437	37341	30067	4399	4678	2150	2106	1104	5103													Smp_038960	1001.97	933.661	931.708	760.756	679.389	681.587	461.518	401.301	322.095	506.039
Smp_038970	Chr_ZW	43607225	43615886	8.661		23	13	30	163	5	2	19	27	8	16													Smp_038970	0.0906032	0.052721	0.124973	0.688562	0.128924	0.048651	0.680932	0.858966	0.389677	0.264898
Smp_038980	Chr_ZW	43618768	43629666	10.898		1865	1972	2149	2312	357	340	288	303	243	491													Smp_038980	5.83869	6.35577	7.11462	7.76184	7.31567	6.57297	8.20283	7.66083	9.40681	6.46044
Smp_038990	Chr_5.unplaced.SC_0198	315436	329542	14.106		560	720	1800	1326	113	154	45	48	105	332													Smp_038990	1.35446	1.79282	4.60395	3.43925	1.78899	2.3001	0.990209	0.9376	3.14028	3.3749
Smp_039000	Chr_5.unplaced.SC_0198	302634	312250	9.616		5754	4780	6489	6054	660	763	544	419	380	1152													Smp_039000	20.4155	17.4599	24.347	23.0341	15.3279	16.717	17.5599	12.006	16.6714	17.1785
Smp_039010	Chr_5.unplaced.SC_0198	299239	299685	0.446		0	0	0	0	0	0	0	0	0	0													Smp_039010	0	0	0	0	0	0	0	0	0	0
Smp_039080	Chr_5.unplaced.SC_0198	135707	149177	13.47		1482	1398	2248	3310	502	639	241	224	170	729													Smp_039080	3.75374	3.64542	6.02131	8.99051	8.32279	9.99454	5.55351	4.58206	5.32432	7.76045
Smp_039130	SC_0182	370220	415579	45.359		1500	1706	2720	2347	577	774	454	439	230	939													Smp_039130	1.12827	1.32106	2.16355	1.8931	2.84083	3.59507	3.10678	2.66674	2.13918	2.96845
Smp_039160	SC_0182	302222	306281	4.059		240	438	818	570	72	51	30	26	39	144													Smp_039160	2.01732	3.79021	7.27104	5.13783	3.96138	2.64716	2.29414	1.76496	4.05348	5.0871
Smp_039180	SC_0182	178547	207097	28.55		5122	6560	5351	4790	894	954	587	702	367	1154													Smp_039180	6.12093	8.0706	6.76225	6.13837	6.99301	7.03999	6.3819	6.77503	5.42304	5.79598
Smp_039300	Chr_2	29012483	29050337	37.854		2817	2396	3413	2026	481	552	34	52	36	945													Smp_039300	2.53898	2.22322	3.25302	1.95817	2.8377	3.07225	0.278795	0.378505	0.401212	3.5797
Smp_039340	Chr_2	28941743	28947388	5.645		375	469	1506	1242	88	113	33	38	46	174													Smp_039340	2.26647	2.91821	9.6255	8.04973	3.48138	4.21739	1.81455	1.85481	3.43777	4.4199
Smp_039390	Chr_2	28826659	28832624	5.965		1090	1107	1181	1184	160	169	104	129	56	213													Smp_039390	6.23447	6.51846	7.14335	7.26215	5.99021	5.96906	5.41179	5.95881	3.9606	5.12031
Smp_039400	Chr_2	28796005	28796675	0.67		38111	29419	33994	38947	1883	1924	2170	2593	1663	2969													Smp_039400	1940.7	1542.27	1830.58	2126.78	627.636	605.006	1005.32	1066.37	1047.13	635.422
Smp_039470	Chr_2	28554679	28557238	2.559		0	0	0	0	0	0	0	0	0	0													Smp_039470	0	0	0	0	0	0	0	0	0	0
Smp_039490	Chr_5	6407653	6425032	17.379		3851	5997	7196	6564	1214	1326	843	834	639	2267													Smp_039490	7.56018	12.1204	14.9392	13.8187	15.6001	16.0749	15.0564	13.2227	15.5117	18.7048
Smp_039590	Chr_ZW	52976256	52979986	3.73		142	88	77	131	89	120	9	11	8	128													Smp_039590	1.29886	0.82867	0.744808	1.28495	5.32861	6.77801	0.748948	0.812576	0.904824	4.92072
Smp_039600	Chr_ZW	52968440	52969366	0.926		4	1	18	20	2	1	1	5	0	0													Smp_039600	0.147378	0.0379312	0.701332	0.79021	0.482338	0.227519	0.335202	1.48778	0	0
Smp_039620	Chr_ZW	52891067	52899073	8.006		650	255	514	1155	16	33	0	6	1	30													Smp_039620	2.77001	1.11875	2.31638	5.27825	0.44631	0.868416	0	0.206498	0.0526948	0.53732
Smp_039640	Chr_ZW	52837260	52855674	18.414		3560	4991	4071	5399	702	579	633	651	527	1132													Smp_039640	6.59607	9.52023	7.97655	10.7273	8.51376	6.6246	10.6702	9.74121	12.0738	8.81506
Smp_039650	Chr_ZW	52804752	52825567	20.815		406	321	915	1509	265	172	51	80	37	276													Smp_039650	0.665477	0.541672	1.58601	2.65238	2.84316	1.74093	0.760522	1.05899	0.749908	1.90134
Smp_039670	Chr_ZW	52713270	52721847	8.577		4088	5268	4292	2854	388	465	326	333	297	568													Smp_039670	16.2614	21.5734	18.0545	12.1743	10.1025	11.4221	11.7978	10.6977	14.6084	9.49598
Smp_039740	Chr_ZW	52367838	52378691	10.853		1475	1303	1828	1859	616	565	281	300	287	928													Smp_039740	4.63688	4.21699	6.07699	6.26691	12.6755	10.968	8.03664	7.61643	11.1562	12.261
Smp_039750	Chr_ZW	52310013	52347836	37.823		463	542	771	508	106	78	22	12	36	171													Smp_039750	0.417646	0.503328	0.735463	0.491396	0.625868	0.434478	0.180545	0.0874189	0.401541	0.648287
Smp_039810	Chr_ZW	51987183	52038041	50.858		794	1577	1818	576	671	673	62	82	35	1114													Smp_039810	0.532654	1.08913	1.28972	0.414369	2.94643	2.78795	0.378399	0.444258	0.29033	3.14089
Smp_039820	Chr_ZW	51956894	51978087	21.193		2143	2396	4185	4106	566	666	530	659	475	1001													Smp_039820	3.44995	3.97102	7.12468	7.08843	5.96426	6.62081	7.7625	8.56788	9.45549	6.77281
Smp_039870	Chr_ZW	51840010	51889431	49.421		767	1167	2008	724	463	547	161	196	167	983													Smp_039870	0.529502	0.829406	1.46593	0.535983	2.09219	2.33188	1.01119	1.09276	1.42557	2.85213
Smp_039970	Chr_5	7280956	7281238	0.282		538	483	909	890	259	270	267	332	100	293													Smp_039970	65.0904	60.1597	116.299	115.469	205.108	201.718	293.887	324.391	149.601	148.986
Smp_039980	Chr_5	7299366	7300182	0.816		1923	1296	2140	2912	177	175	97	96	93	274													Smp_039980	80.4031	55.7857	94.6206	130.564	48.4413	45.1832	36.8977	32.4161	48.0812	48.149
Smp_040020	Chr_5	7528102	7537988	9.886		559	655	849	518	26	23	65	72	34	33													Smp_040020	1.92919	2.32717	3.09848	1.91705	0.587334	0.490159	2.04085	2.00674	1.45091	0.478653
Smp_040080	Chr_5	7707940	7720862	12.922		3300	2752	5029	5518	839	1044	685	688	438	1568													Smp_040080	8.713	7.48043	14.0415	15.6234	14.4999	17.0216	16.4543	14.6703	14.2997	17.3998
Smp_040100	Chr_5	7827297	7841814	14.517		13081	7769	7195	8206	176	216	485	533	203	286													Smp_040100	30.7431	18.7973	17.882	20.6813	2.7075	3.13478	10.3701	10.1165	5.89932	2.82499
Smp_040110	Chr_5	7860238	7888522	28.284		63	52	135	151	6	19	4	0	6	26													Smp_040110	0.0759947	0.0645759	0.172209	0.195326	0.0473743	0.141528	0.0438972	0	0.0894939	0.131813
Smp_040130	Chr_5	7964642	7965291	0.649		294279	199847	188302	206728	8451	6916	6153	7477	2312	6783													Smp_040130	15470.3	10815.9	10468.2	11654.1	2908.01	2245.12	2942.8	3174.41	1502.89	1498.66
Smp_040190	Chr_1	60201487	60233500	32.013		1673	2196	3144	2395	968	1247	489	627	409	1689													Smp_040190	1.78301	2.40943	3.54339	2.73718	6.75276	8.20672	4.74133	5.39661	5.38989	7.56537
Smp_040270	Chr_1	60394762	60399708	4.946		4398	5496	4374	3699	967	853	589	787	411	1114													Smp_040270	30.3378	39.0302	31.9071	27.3624	43.6621	36.3349	36.964	43.8431	35.0567	32.2967
Smp_040280	Chr_1	60402319	60409792	7.473		2998	3216	3545	3326	320	413	203	231	210	457													Smp_040280	13.6874	15.1157	17.1153	16.2836	9.56286	11.6435	8.43178	8.51721	11.8552	8.76896
Smp_040350	Chr_1	60681334	60698423	17.089		571	985	1406	727	41	27	85	82	103	67													Smp_040350	1.14	2.02455	2.96846	1.55647	0.535796	0.332872	1.5439	1.32214	2.54275	0.562193
Smp_040360	Chr_1	60717178	60727960	10.782		701	896	1045	1073	190	213	131	149	106	289													Smp_040360	2.21821	2.91888	3.49687	3.64103	3.93538	4.16207	3.77129	3.80774	4.14753	3.84349
Smp_040390	Chr_1	60834110	60835738	1.628		0	0	2	0	0	0	0	0	0	0													Smp_040390	0	0	0.0443239	0	0	0	0	0	0	0
Smp_040440	Chr_3	2889769	2902384	12.615		11	21	35	39	5	13	2	3	2	3													Smp_040440	0.0297501	0.0584709	0.100102	0.11311	0.0885147	0.217113	0.0492109	0.0655261	0.0668845	0.0341005
Smp_040450	Chr_3	2847302	2853961	6.659		1415	1631	1174	716	123	141	101	128	118	176													Smp_040450	7.24988	8.60306	6.36094	3.93394	4.12504	4.46108	4.70794	5.29641	7.47577	3.78993
Smp_040460	Chr_1	60966904	60972791	5.887		2284	3708	4304	2072	625	640	390	423	301	862													Smp_040460	13.2369	22.1235	26.3779	12.8771	23.7093	22.9042	20.5631	19.7982	21.5703	20.9962
Smp_040500	Chr_1	61143185	61150123	6.938		3829	4652	4483	3836	998	909	613	666	436	1296													Smp_040500	18.8293	23.5512	23.3129	20.2287	32.1239	27.6032	27.4249	26.4497	26.5116	26.7854
Smp_040510	Chr_1	61156867	61200137	43.27		2436	2508	3456	3474	579	727	255	351	292	954													Smp_040510	1.92076	2.03586	2.8817	2.93742	2.9883	3.53979	1.82924	2.23512	2.84694	3.16147
Smp_040540	Chr_1	61317812	61333261	15.449		4621	5218	4165	3009	588	440	495	583	429	693													Smp_040540	10.2051	11.8635	9.72695	7.126	8.49982	6.00042	9.94542	10.398	11.7149	6.43221
Smp_040550	Chr_1	61397538	61407120	9.582		457	526	803	430	120	143	56	71	10	185													Smp_040550	1.62721	1.92814	3.02358	1.64186	2.79678	3.14419	1.81405	2.04166	0.440278	2.76849
Smp_040560	Chr_1	61416483	61432762	16.279		673	606	1166	2085	146	145	106	118	58	309													Smp_040560	1.41049	1.30753	2.58424	4.686	2.00289	1.87659	2.02114	1.99726	1.50308	2.72181
Smp_040570	Chr_1	61443574	61456420	12.846		5341	5839	6281	5513	2170	2424	1102	1103	1152	3693													Smp_040570	14.1853	15.9654	17.641	15.7016	37.7246	39.7552	26.6276	23.6585	37.8327	41.2229
Smp_040610	Chr_1	61967413	61977193	9.78		27	15	33	30	8	14	5	7	4	28													Smp_040610	0.0941908	0.0538717	0.121741	0.112229	0.182677	0.301591	0.15869	0.197215	0.172546	0.410531
Smp_040680	Chr_1	61664228	61665885	1.657		5454	2910	5662	7240	127	141	16	51	45	197													Smp_040680	112.299	61.6848	123.285	159.86	17.1165	17.9278	2.9972	8.48063	11.4571	17.0479
Smp_040710	Chr_3	20848999	20851543	2.544		784	679	833	974	85	117	65	99	32	87													Smp_040710	10.5144	9.37477	11.8138	14.0077	7.46164	9.68943	7.93075	10.7226	5.30659	4.90376
Smp_040720	Chr_3	20792040	20801333	9.293		762	694	1584	1718	444	456	108	109	102	676													Smp_040720	2.79758	2.62308	6.14981	6.7638	10.6699	10.338	3.60733	3.23185	4.63049	10.4308
Smp_040770	Chr_3	20585810	20615751	29.941		3235	3934	3639	2922	395	379	282	294	158	494													Smp_040770	3.68631	4.61505	4.38508	3.57057	2.94621	2.66687	2.92349	2.70559	2.22625	2.36585
Smp_040790	Chr_3	20565686	20566626	0.94		23112	20068	20498	17015	1299	1260	2039	2350	1395	1526													Smp_040790	838.867	749.867	786.766	662.259	308.613	282.405	673.298	688.843	626.079	232.784
Smp_040800	Chr_3	20532384	20564148	31.764		7209	9347	6805	4601	1586	1888	929	1153	834	2732													Smp_040800	7.74325	10.3358	7.72957	5.29957	11.1507	12.5227	9.07818	10.0017	11.0768	12.3331
Smp_040960	Chr_1	41503540	41519679	16.139		1027	885	1475	1367	115	129	53	89	82	217													Smp_040960	2.17109	1.92608	3.29745	3.09896	1.59131	1.684	1.01934	1.51948	2.14348	1.92801
Smp_040970	Chr_1	41547115	41572232	25.117		9109	12051	14157	15466	3815	3839	1732	1824	782	4207													Smp_040970	12.3733	16.8525	20.336	22.5286	33.9203	32.2018	21.4042	20.0095	13.1348	24.0177
Smp_040990	Chr_1	41627314	41627883	0.569		733	666	1492	1628	8	21	16	25	28	37													Smp_040990	43.9517	41.1121	94.606	104.681	3.13986	7.77565	8.72822	12.1062	20.7601	9.32431
Smp_041050	Chr_1	41784923	41793294	8.371		4051	3449	5443	4895	446	538	221	288	205	672													Smp_041050	16.5108	14.4718	23.4597	21.3943	11.8984	13.5405	8.1947	9.47972	10.3314	11.5112
Smp_041060	Chr_1	41810488	41822733	12.245		3868	5026	5796	3936	770	666	323	315	206	786													Smp_041060	10.7773	14.4169	17.0778	11.7603	14.0431	11.459	8.1877	7.08814	7.09727	9.2043
Smp_041100	Chr_1	41912575	41927496	14.921		525	459	1189	1239	148	120	72	108	66	202													Smp_041100	1.20045	1.08049	2.87505	3.03807	2.21512	1.69439	1.4978	1.99437	1.86607	1.94125
Smp_041190	Chr_7.unplaced.SC_0100	32856	54389	21.533		1770	1990	3100	3405	944	981	442	513	395	1585													Smp_041190	2.80448	3.24606	5.19421	5.78544	9.79039	9.59829	6.37141	6.56437	7.73883	10.5548
Smp_041210	Chr_7.unplaced.SC_0100	121937	126493	4.556		228	314	1003	1386	33	36	1	6	9	107													Smp_041210	1.7074	2.42077	7.94291	11.1302	1.61757	1.66475	0.0681294	0.362867	0.833377	3.36765
Smp_041280	Chr_7.unplaced.SC_0100	384817	433342	48.525		237	326	448	216	122	150	6	12	6	187													Smp_041280	0.166635	0.235972	0.3331	0.162859	0.56147	0.651261	0.0383799	0.068139	0.0521637	0.55259
Smp_041320	Chr_1	40024431	40025658	1.227		0	0	0	0	0	0	0	0	0	0													Smp_041320	0	0	0	0	0	0	0	0	0	0
Smp_041350	Chr_7.unplaced.SC_0100	486592	487284	0.692		57	42	89	40	4	6	1	5	5	18													Smp_041350	2.8103	2.13182	4.6403	2.11484	1.29088	1.82673	0.448551	1.99088	3.04822	3.72987
Smp_041370	Chr_7.unplaced.SC_0100	578068	615507	37.439		1980	3022	4141	2302	393	375	140	175	96	656													Smp_041370	1.80437	2.83516	3.99065	2.2496	2.34423	2.11026	1.16071	1.28794	1.08176	2.5125
Smp_041390	Chr_7.unplaced.SC_0100	684823	696884	12.061		2647	2292	3337	2975	518	568	326	375	243	753													Smp_041390	7.4878	6.67482	9.9824	9.02459	9.59133	9.92189	8.38982	8.56699	8.49975	8.95238
Smp_041430	Chr_7.unplaced.SC_0100	815184	817215	2.031		9798	7271	8073	9079	2604	2128	769	849	540	2722													Smp_041430	164.593	125.745	143.413	163.55	286.328	220.745	117.526	115.18	112.167	192.179
Smp_041450	Chr_7.unplaced.SC_0100	830675	845416	14.741		10835	12588	11214	7503	720	649	608	765	547	1020													Smp_041450	25.0776	29.9942	27.4471	18.6222	10.9078	9.27571	12.8025	14.2993	15.6546	9.92202
Smp_041460	Chr_7.unplaced.SC_0100	861019	877499	16.48		605	718	2108	815	403	542	401	356	266	508													Smp_041460	1.25251	1.5303	4.61504	1.80936	5.4611	6.92902	7.55275	5.95214	6.80938	4.42012
Smp_041480	Chr_7.unplaced.SC_0100	969644	984315	14.671		8239	11730	8299	5312	943	725	589	692	294	878													Smp_041480	19.1601	28.0832	20.4093	13.2471	14.3544	10.4114	12.4616	12.9965	8.45416	8.58147
Smp_041490	Chr_7.unplaced.SC_0100	1015021	1021461	6.44		970	782	1135	2041	110	135	108	116	67	180													Smp_041490	5.13889	4.2651	6.35876	11.5953	3.81452	4.41649	5.20542	4.96309	4.38906	4.00787
Smp_041500	Chr_7.unplaced.SC_0100	1021672	1025412	3.74		3602	3168	3735	3735	467	660	407	404	279	639													Smp_041500	32.8591	29.7524	36.0314	36.5378	27.8855	37.1794	33.7785	29.7639	31.4714	24.4995
Smp_041520	Chr_7.unplaced.SC_0100	1063763	1073148	9.385		335	309	981	1222	94	105	42	88	54	239													Smp_041520	1.21785	1.15646	3.77135	4.76388	2.23679	2.35714	1.3891	2.58362	2.42741	3.65166
Smp_041540	Chr_7.unplaced.SC_0100	1168070	1171933	3.863		830	1237	1190	485	116	126	915	850	502	186													Smp_041540	7.33056	11.2474	11.1144	4.59347	6.70604	6.87188	73.5215	60.6282	54.8229	6.90423
Smp_041550	Chr_7.unplaced.SC_0100	1175980	1187625	11.645		808	789	1260	637	345	412	136	154	63	471													Smp_041550	2.36731	2.37983	3.90385	2.00135	6.61625	7.45396	3.62508	3.64386	2.28236	5.79974
Smp_041570	Chr_7.unplaced.SC_0100	1278238	1279514	1.276		27	24	66	10	13	9	1	2	0	16													Smp_041570	0.721933	0.660646	1.86619	0.28673	2.27523	1.48601	0.243258	0.431876	0	1.79803
Smp_041600	Chr_7	6404337	6441773	37.436		3453	5398	4446	4233	542	433	563	719	372	720													Smp_041600	3.14696	5.06467	4.28492	4.13697	3.23327	2.43685	4.66807	5.292	4.19215	2.75785
Smp_041630	Chr_7	6518371	6542548	24.177		657	1181	989	386	134	146	102	84	78	376													Smp_041630	0.927143	1.71576	1.4759	0.584129	1.23776	1.27227	1.30953	0.95732	1.36105	2.23004
Smp_041650	Chr_7	6599032	6599553	0.521		24873	14659	10450	14262	496	414	849	969	758	567													Smp_041650	1628.82	988.268	723.67	1001.54	212.607	167.414	505.811	512.467	613.782	156.053
Smp_041680	SC_0180	369836	370274	0.438		1049	764	1380	1452	92	110	60	90	37	150													Smp_041680	81.7118	61.2671	113.676	121.288	46.9079	52.9113	42.5202	56.6172	35.6378	49.1071
Smp_041700	SC_0180	468955	470058	1.103		32	20	49	21	12	9	4	3	0	37													Smp_041700	0.989824	0.636887	1.60281	0.696574	2.42962	1.71908	1.12565	0.749421	0	4.81009
Smp_041730	Chr_4	21369753	21379396	9.643		1659	1595	2916	2842	638	693	394	448	411	1363													Smp_041730	5.86973	5.80974	10.9103	10.7829	14.7755	15.1409	12.6824	12.8011	17.9809	20.268
Smp_041740	Chr_4	21400735	21402736	2.001		37813	41766	23571	17023	2177	2010	2289	2652	1656	2794													Smp_041740	644.73	733.135	425.004	311.252	242.965	211.631	355.072	365.18	349.137	200.22
Smp_041750	Chr_4	21418737	21436496	17.759		1323	1684	3066	3364	366	528	273	294	262	795													Smp_041750	2.5417	3.33067	6.22896	6.93045	4.60251	6.2639	4.77158	4.56151	6.22394	6.41912
Smp_041760	Chr_4	21447926	21467688	19.762		3451	4527	5354	4697	912	639	447	587	703	1789													Smp_041760	5.95796	8.04614	9.77484	8.69588	10.3062	6.81239	7.02093	8.18441	15.0075	12.981
Smp_041770	Chr_4	21541179	21567255	26.076		4322	7240	7431	5351	2747	3153	767	895	668	5172													Smp_041770	5.65493	9.75227	10.2818	7.50789	23.5261	25.4749	9.13004	9.45719	10.8073	28.441
Smp_041820	Chr_4	21725280	21772977	47.697		242	410	598	232	107	131	38	36	13	165													Smp_041820	0.173104	0.301926	0.452348	0.177959	0.500986	0.578642	0.247292	0.207966	0.114983	0.496044
Smp_041830	Chr_4	21813853	21817645	3.792		2250	1813	3101	2789	866	1078	469	608	346	1001													Smp_041830	20.2441	16.7934	29.505	26.9094	51.0014	59.8935	38.3904	44.179	38.4938	37.8523
Smp_041880	Chr_4	21927065	21928093	1.028		4	1	1	4	0	1	23	49	51	0													Smp_041880	0.132755	0.0341676	0.0350969	0.142361	0	0.204945	6.94469	13.1336	20.9296	0
Smp_041890	Chr_4	21930734	21937884	7.15		2207	2009	2599	2474	309	363	196	235	123	347													Smp_041890	10.5312	9.8692	13.1148	12.6595	9.65128	10.6962	8.5088	9.05612	7.25742	6.95906
Smp_041960	Chr_4	22046416	22054023	7.607		0	1	0	0	0	0	0	0	0	1													Smp_041960	0	0.00461737	0	0	0	0	0	0	0	0.0188501
Smp_041970	SC_0062	1223293	1225912	2.619		22	11	40	9	0	2	0	0	0	1													Smp_041970	0.286596	0.147525	0.551045	0.125728	0	0.160888	0	0	0	0.0547509
Smp_041980	Chr_4	22078018	22078652	0.634		62341	35383	30257	41699	821	788	1433	1533	1006	1377													Smp_041980	3354.81	1960.26	1721.86	2406.36	289.192	261.858	701.577	666.244	669.409	311.438
Smp_042020	Chr_4	22211283	22263609	52.326		1883	1536	2654	3346	1204	1043	58	107	72	1791													Smp_042020	1.22777	1.03105	1.82998	2.33955	5.13856	4.19949	0.344056	0.563438	0.580494	4.90801
Smp_042030	Chr_4	22265806	22276390	10.584		1636	1900	3056	2487	285	274	112	196	75	373													Smp_042030	5.27372	6.30539	10.4176	8.59705	6.0135	5.45419	3.28463	5.10254	2.98947	5.05343
Smp_042050	Chr_4	22328762	22353749	24.987		1008	1224	1843	2038	218	287	225	269	267	375													Smp_042050	1.37635	1.72058	2.66117	2.9841	1.94839	2.4199	2.79503	2.96632	4.50796	2.15201
Smp_042060	Chr_4	22360963	22370235	9.272		1359	969	2639	3644	895	1244	230	221	141	1058													Smp_042060	5.00069	3.67078	10.269	14.379	21.5567	28.2668	7.69968	6.56749	6.41547	16.3621
Smp_042080	Chr_4	22426662	22431637	4.975		867	673	1293	1977	160	172	133	126	72	340													Smp_042080	5.94579	4.75149	9.37708	14.5391	7.18223	7.28392	8.29806	6.97843	6.10552	9.7997
Smp_042090	Chr_4	22427799	22436714	8.915		47717	33504	36078	41155	2264	1496	4244	4430	2468	2129													Smp_042090	182.615	132.003	146.01	168.898	56.7137	35.3541	147.765	136.919	116.79	34.2438
Smp_042110	Chr_4	22479076	22481259	2.183		6769	4887	6090	6201	306	260	271	353	224	501													Smp_042110	105.792	78.6315	100.653	103.928	31.304	25.0928	38.5331	44.5555	43.289	32.9087
Smp_042120	Chr_4	22496446	22496932	0.486		325	241	466	423	37	63	7	2	1	201													Smp_042120	22.8155	17.4176	34.5949	31.844	17.0019	27.3108	4.47075	1.1339	0.868054	59.3044
Smp_042140	Chr_4	22601096	22638747	37.651		1487	1393	2686	2593	782	873	465	512	361	1529													Smp_042140	1.34747	1.29952	2.5739	2.51971	4.63834	4.88503	3.83349	3.74691	4.04495	5.82315
Smp_042150	Chr_4	22653010	22667664	14.654		265	188	790	1381	26	23	11	9	9	8													Smp_042150	0.616983	0.450619	1.94506	3.44795	0.396232	0.330675	0.232999	0.169226	0.259101	0.0782818
Smp_042160	Chr_4	22686384	22690604	4.22		57363	67232	39789	24964	36526	45214	6562	6190	5220	65905													Smp_042160	463.77	559.592	340.183	216.434	1932.96	2257.3	482.661	404.165	521.844	2239.41
Smp_042170	Chr_4	22695402	22704085	8.683		19	6	16	19	13	7	1	1	0	21													Smp_042170	0.0746565	0.0242711	0.0664833	0.0800585	0.334354	0.169847	0.0357477	0.0317329	0	0.346798
Smp_042210	Chr_4	22839803	22845315	5.512		412	424	984	1177	37	65	35	49	27	72													Smp_042210	2.55018	2.70187	6.44092	7.81252	1.49908	2.48447	1.97096	2.44944	2.06651	1.87305
Smp_042230	SC_0191	474045	481061	7.016		285	295	613	569	48	56	53	47	47	62													Smp_042230	1.38592	1.47686	3.15234	2.9672	1.52786	1.68162	2.34479	1.84582	2.82612	1.26715
Smp_042270	SC_0191	304121	309230	5.109		12564	13141	7849	6654	1571	1624	1249	1282	639	1404													Smp_042270	83.9026	90.3442	55.4295	47.6508	68.6709	66.9699	75.883	69.1405	52.7652	39.4056
Smp_042280	SC_0191	300263	303479	3.216		1959	1247	2740	3468	113	164	112	136	82	194													Smp_042280	20.7827	13.6194	30.7395	39.4536	7.84684	10.7438	10.8099	11.6521	10.7567	8.64993
Smp_042300	SC_0191	253391	262948	9.557		25524	22500	24165	22478	2338	2515	503	509	334	3561													Smp_042300	91.1194	82.693	91.2278	86.0518	54.6331	55.4429	16.3367	14.6749	14.7437	53.4291
Smp_042340	SC_0191	67385	111112	43.727		549	794	1764	1127	232	212	19	14	12	464													Smp_042340	0.428357	0.637792	1.4555	0.94297	1.18487	1.02145	0.134872	0.0882183	0.115775	1.52158
Smp_042390	Chr_4	18953087	18955349	2.262		2412	1939	2342	2313	72	68	166	180	135	68													Smp_042390	36.3805	30.1088	37.3557	37.4116	7.10841	6.33353	22.7789	21.926	25.1782	4.31066
Smp_042400	Chr_4	18964901	18965693	0.792		7431	5834	6231	7217	343	235	568	773	496	450													Smp_042400	320.115	258.731	283.854	333.392	96.7167	62.5133	222.608	268.927	264.204	81.4731
Smp_042420	Chr_4	18987112	19000574	13.462		800	746	1090	1132	88	67	45	66	45	107													Smp_042420	2.02751	1.94642	2.92132	3.07653	1.45984	1.04856	1.03758	1.35087	1.41022	1.13973
Smp_042430	Chr_4	19001255	19007083	5.828		468	432	530	819	32	30	31	39	40	54													Smp_042430	2.73974	2.60359	3.28109	5.14148	1.2262	1.0845	1.65105	1.84385	2.8955	1.32862
Smp_042440	Chr_4	19020566	19035677	15.111		378	482	877	707	119	124	149	171	89	172													Smp_042440	0.853458	1.12037	2.09396	1.71179	1.75868	1.72885	3.06063	3.11805	2.48473	1.63216
Smp_042530	Chr_ZW	46192836	46218634	25.798		70	32	94	112	43	76	5	6	4	81													Smp_042530	0.0925754	0.0435684	0.131463	0.158838	0.372233	0.620665	0.0601592	0.0640834	0.0654119	0.450221
Smp_042550	Chr_ZW	46123884	46142831	18.947		2462	2777	4263	4006	921	1083	750	907	603	1435													Smp_042550	4.43334	5.14806	8.11778	7.7356	10.8555	12.0425	12.2868	13.1901	13.4264	10.8602
Smp_042560	Chr_ZW	46107827	46109041	1.214		7417	7177	4916	4316	419	330	375	423	261	512													Smp_042560	208.446	207.65	146.102	130.073	77.0776	57.2697	95.8806	96.0068	90.6995	60.4753
Smp_042590	Chr_ZW	45929236	45933661	4.425		5516	5247	6595	5381	1229	1371	505	676	301	1928													Smp_042590	42.5299	41.6491	53.7729	44.4911	62.0256	65.276	35.4239	42.0934	28.697	62.4771
Smp_042630	Chr_ZW	45783675	45785906	2.231		547	379	525	1194	22	23	22	41	12	33													Smp_042630	8.3651	5.96688	8.49028	19.5807	2.20219	2.17199	3.06084	5.06366	2.26916	2.121
Smp_042650	Chr_ZW	45770760	45780182	9.422		297	510	454	381	75	60	42	28	46	66													Smp_042650	1.07547	1.90123	1.7385	1.47947	1.77767	1.34165	1.38364	0.818833	2.05967	1.00445
Smp_042670	Chr_3	22535435	22563483	28.048		2118	2771	2704	2164	353	356	192	224	207	592													Smp_042670	2.57637	3.4701	3.4783	2.82279	2.81064	2.6741	2.1248	2.20053	3.11352	3.02654
Smp_042680	Chr_3	22522552	22533229	10.677		7811	6321	6424	6305	561	495	507	577	322	689													Smp_042680	24.9598	20.7943	21.7079	21.6053	11.734	9.76755	14.7393	14.8904	12.723	9.25331
Smp_042690	Chr_3	22521626	22522190	0.564		6981	5778	7378	6053	699	780	304	304	226	999													Smp_042690	422.301	359.837	471.978	392.659	276.777	291.37	167.306	148.517	169.049	253.988
Smp_042700	Chr_4	11896825	11918697	21.872		234	168	409	409	29	31	206	267	223	61													Smp_042700	0.365015	0.269792	0.674679	0.684161	0.296103	0.298609	2.92346	3.36359	4.3013	0.399916
Smp_042720	Chr_ZW	41768286	41771956	3.67		54	66	110	78	16	17	12	13	4	15													Smp_042720	0.502009	0.631664	1.08141	0.777593	0.973613	0.975916	1.01492	0.976017	0.459808	0.586074
Smp_042740	Chr_4	12004746	12006448	1.702		820	1007	997	642	164	223	45	77	48	261													Smp_042740	16.4376	20.7815	21.1348	13.8006	21.5187	27.6042	8.20675	12.4655	11.8977	21.9891
Smp_042770	Chr_4	12069988	12096009	26.021		206	322	588	435	58	99	72	78	52	116													Smp_042770	0.270101	0.43465	0.815296	0.61163	0.497779	0.801569	0.858868	0.825944	0.843067	0.639236
Smp_042780	Chr_4	12108578	12121368	12.79		1201	1395	1741	1448	146	171	113	135	80	233													Smp_042780	3.20373	3.831	4.91123	4.14211	2.54926	2.81679	2.74237	2.90833	2.63878	2.61224
Smp_042790	Chr_4	12124030	12131902	7.872		736	594	979	1165	102	112	191	176	93	202													Smp_042790	3.18989	2.65039	4.48704	5.41458	2.89366	2.99752	7.53124	6.16038	4.98403	3.67954
Smp_042810	Chr_4	12149082	12164641	15.559		344	386	724	607	9	36	25	44	23	21													Smp_042810	0.754328	0.871392	1.67888	1.42735	0.129179	0.487473	0.498743	0.779204	0.623633	0.193537
Smp_042910	Chr_ZW.unplaced.SC_0115	1047962	1050367	2.405		571	845	1629	1331	566	668	329	404	303	809													Smp_042910	8.10037	12.341	24.4381	20.2482	52.5574	58.5182	42.4619	46.2857	53.1509	48.2348
Smp_042920	Chr_ZW.unplaced.SC_0115	1052734	1061483	8.749		826	715	960	1162	124	156	86	118	111	204													Smp_042920	3.22111	2.87049	3.9589	4.85927	3.16516	3.75661	3.05111	3.71624	5.35239	3.34348
Smp_042980	Chr_4	12678658	12679935	1.277		1997	1600	2725	3711	59	85	81	99	43	119													Smp_042980	53.3545	44.0085	76.9906	106.322	10.318	14.0235	19.6885	21.3611	14.2056	13.3624
Smp_042990	Chr_4	12690215	12717651	27.436		362	358	824	624	161	195	100	93	101	221													Smp_042990	0.450165	0.458321	1.0836	0.832123	1.3105	1.49742	1.13135	0.93399	1.55304	1.15504
Smp_043010	Chr_4	12740263	12752871	12.608		485	605	1056	1051	119	124	116	150	200	263													Smp_043010	1.31244	1.68545	3.0219	3.04986	2.10782	2.07207	2.85581	3.27812	6.69217	2.99114
Smp_043030	Chr_4	12796723	12802977	6.254		11659	11891	10401	8709	6412	5960	1967	1321	1044	7061													Smp_043030	63.6044	66.7834	60.0039	50.9488	228.965	200.779	97.6258	58.2003	70.4248	161.896
Smp_043040	Chr_4	12862538	12871952	9.414		34	32	100	157	6	11	2	1	0	16													Smp_043040	0.123222	0.119394	0.383255	0.610168	0.142334	0.246177	0.0659438	0.0292689	0	0.24371
Smp_043070	Chr_4	12934416	12939722	5.306		885	740	1084	920	125	156	103	131	112	211													Smp_043070	5.69062	4.89861	7.37096	6.34372	5.26109	6.19422	6.02543	6.80275	8.905	5.7022
Smp_043100	Chr_4	13115284	13116390	1.106		24855	24767	17182	12691	1492	1478	1154	1292	594	1413													Smp_043100	766.73	786.55	560.507	419.821	301.263	281.546	323.869	321.875	226.576	183.195
Smp_043110	Chr_4	13116724	13124145	7.421		1729	1255	3341	2227	615	773	101	122	77	1077													Smp_043110	7.94907	5.94004	16.2434	10.9795	18.5074	21.9456	4.22452	4.52979	4.37735	20.8104
Smp_043120	Chr_4	13158120	13158783	0.663		13787	11611	14772	13204	1741	1741	2474	2752	1206	2144													Smp_043120	709.479	615.126	803.874	728.645	586.432	553.242	1158.26	1143.71	767.391	463.701
Smp_043130	Chr_4	13222994	13228960	5.966		1601	1159	2159	2675	183	163	140	163	122	288													Smp_043130	9.1557	6.82352	13.0566	16.4045	6.85016	5.75617	7.28388	7.52809	8.62699	6.92208
Smp_043150	Chr_4	13283909	13299090	15.181		38901	44481	29423	20713	5135	5540	3254	3748	2295	6524													Smp_043150	87.4267	102.916	69.9276	49.9191	75.5392	76.8845	66.5327	68.0267	63.7772	61.6227
Smp_043170	Chr_4	13344466	13377319	32.853		1668	1795	1965	1414	409	493	116	131	148	825													Smp_043170	1.73223	1.9191	2.15799	1.5747	2.78023	3.16156	1.09598	1.09869	1.90051	3.60086
Smp_043200	Chr_4	13417179	13425299	8.12		1068	1452	1573	1893	209	166	200	261	125	200													Smp_043200	4.48744	6.28085	6.98932	8.5294	5.74808	4.30707	7.64526	8.85655	6.49437	3.53184
Smp_043210	Chr_4	13449513	13472209	22.696		2353	2394	2609	1776	605	575	238	210	147	847													Smp_043210	3.53717	3.70495	4.14751	2.86297	5.95304	5.33762	3.25496	2.54947	2.73244	5.35132
Smp_043220	Chr_4	13494174	13501351	7.177		5187	4050	5801	8092	2977	2702	688	616	388	3590													Smp_043220	24.6579	19.8207	29.1623	41.2512	92.6336	79.318	29.7553	23.6493	22.8072	71.7263
Smp_043250	Chr_4	13575082	13575755	0.673		0	0	3	0	1	2	0	1	2	5													Smp_043250	0	0	0.16083	0	0.331831	0.626101	0	0.409416	1.25371	1.06532
Smp_043260	Chr_4	13580763	13586997	6.234		27	24	65	36	2	4	1	4	0	5													Smp_043260	0.147768	0.135224	0.376191	0.21128	0.0716466	0.135183	0.0497911	0.176796	0	0.115009
Smp_043270	Chr_4	13589921	13591096	1.175		1	1	12	1	0	0	0	0	2	0													Smp_043270	0.0290366	0.029893	0.368473	0.0311377	0	0	0	0	0.718084	0
Smp_043290	Chr_4	13623923	13625416	1.493		3	1	5	5	0	0	2	6	7	1													Smp_043290	0.0685559	0.023526	0.120829	0.122528	0	0	0.415804	1.10732	1.97798	0.0960433
Smp_043300	Chr_4	13641082	13642650	1.568		0	0	2	0	0	0	0	0	0	0													Smp_043300	0	0	0.04602	0	0	0	0	0	0	0
Smp_043320	Chr_4	13682853	13684457	1.604		0	4	7	1	0	0	0	0	0	1													Smp_043320	0	0.0875918	0.157455	0.0228097	0	0	0	0	0	0.089397
Smp_043340	Chr_4	13704165	13705820	1.655		0	1	11	3	0	0	0	0	0	0													Smp_043340	0	0.0212232	0.239804	0.0663204	0	0	0	0	0	0
Smp_043350	Chr_4	13712773	13725149	12.376		1381	1744	1867	1400	170	196	172	192	119	243													Smp_043350	3.80712	4.94965	5.44285	4.13877	3.06762	3.33661	4.31386	4.27466	4.05648	2.81548
Smp_043360	Chr_4	13750385	13756248	5.863		5	19	116	162	24	15	0	7	1	8													Smp_043360	0.029096	0.113826	0.713839	1.01092	0.914164	0.539015	0	0.328972	0.0719553	0.195658
Smp_043390	Chr_ZW	17810791	17828734	17.943		412	985	963	643	1220	1643	678	524	382	1662													Smp_043390	0.783404	1.92819	1.93639	1.31111	15.1844	19.2918	11.7288	8.04668	8.98155	13.282
Smp_043420	Chr_ZW	17755618	17756625	1.007		161	189	145	128	31	37	11	10	6	35													Smp_043420	5.45481	6.59235	5.19518	4.65055	6.87488	7.74108	3.39064	2.73622	2.51365	4.98386
Smp_043430	Chr_ZW	17752755	17755328	2.573		26	9	20	14	19	49	5	15	12	101													Smp_043430	0.34476	0.12286	0.280448	0.199073	1.6491	4.01223	0.603182	1.60632	1.96754	5.62871
Smp_043500	Chr_ZW	17586707	17605024	18.317		2128	1611	1765	1930	455	601	112	115	106	778													Smp_043500	3.9637	3.08922	3.47658	3.85502	5.5474	6.91273	1.89794	1.72991	2.44137	6.09049
Smp_043570	Chr_5	4367305	4380796	13.491		381	231	295	296	48	45	12	13	12	88													Smp_043570	0.963528	0.601417	0.788933	0.802733	0.794565	0.702745	0.276093	0.265509	0.375249	0.935332
Smp_043580	Chr_5	4406857	4407775	0.918		303	354	734	1350	107	103	98	98	49	144													Smp_043580	11.2612	13.5447	28.848	53.804	26.03	23.6387	33.1361	29.4146	22.5183	22.493
Smp_043600	Chr_5	4490305	4495784	5.479		2069	2187	3123	3972	89	106	120	146	184	155													Smp_043600	12.8838	14.0202	20.5652	26.5235	3.62762	4.076	6.79826	7.34229	14.1677	4.05656
Smp_043610	Chr_5	4502551	4516158	13.607		1959	2223	2922	2396	206	247	244	296	257	341													Smp_043610	4.91197	5.73832	7.74783	6.44241	3.38094	3.82441	5.56603	5.9939	7.96808	3.59351
Smp_043620	Chr_5	4523146	4528034	4.888		730	647	1142	1443	160	201	129	153	63	209													Smp_043620	5.09536	4.64923	8.42941	10.8009	7.31007	8.66352	8.19175	8.62463	5.43741	6.13115
Smp_043650	Chr_5	4647701	4667851	20.15		429	221	455	302	594	662	52	64	56	1106													Smp_043650	0.726383	0.385235	0.814702	0.548347	6.58331	6.9217	0.801026	0.875155	1.17245	7.87059
Smp_043670	Chr_5	4692516	4743721	51.205		5349	6977	6412	3375	3529	4166	781	992	617	6301													Smp_043670	3.56405	4.78591	4.51797	2.41149	15.3912	17.141	4.73431	5.33801	5.08342	17.6451
Smp_043780	SC_0261	134935	142502	7.567		1263	1204	1547	1612	107	138	47	89	53	253													Smp_043780	5.6946	5.5887	7.37613	7.79408	3.15786	3.84224	1.92793	3.24076	2.95485	4.79429
Smp_043820	SC_0261	102991	104107	1.116		321	266	571	1151	11	12	8	9	8	21													Smp_043820	9.81351	8.37193	18.4601	37.7342	2.20121	2.26541	2.22507	2.22207	3.02419	2.69825
Smp_043860	Chr_2	9134050	9137299	3.249		0	2	2	3	7	7	1	1	3	10													Smp_043860	0	0.0216216	0.0222097	0.0337828	0.48115	0.453918	0.0955363	0.0848068	0.389542	0.441344
Smp_043910	SC_0194	61127	81270	20.143		2	2	6	12	5	0	1	2	0	1													Smp_043910	0.00338758	0.0034875	0.0107471	0.0217962	0.0554343	0	0.0154097	0.0273581	0	0.00711874
Smp_043920	SC_0194	81324	82409	1.085		70	43	138	124	12	24	11	5	3	18													Smp_043920	2.20116	1.39202	4.58893	4.18134	2.46993	4.66027	3.14689	1.26976	1.16647	2.37887
Smp_043930	SC_0194	84164	84907	0.743		1800	1442	1695	2146	105	93	62	58	55	212													Smp_043930	82.6547	68.1686	82.3082	105.673	31.5597	26.3708	25.9013	21.509	31.2289	40.9142
Smp_043940	SC_0194	95292	100398	5.106		1488	1390	1758	1905	682	667	620	733	512	1159													Smp_043940	9.94273	9.56185	12.4223	13.6502	29.8288	27.5217	37.6902	39.5552	42.3031	32.5484
Smp_043970	SC_0194	137065	141802	4.737		1786	2093	2009	2165	370	353	219	286	278	740													Smp_043970	12.8636	15.5194	15.3017	16.7216	17.4434	15.7	14.3502	16.6358	24.7585	22.4004
Smp_043990	Chr_2	25369099	25378626	9.527		8355	11001	9826	5888	2574	2834	1020	1094	649	3309													Smp_043990	29.9208	40.5587	37.212	22.6118	60.3372	62.672	33.2324	31.6404	28.739	49.8044
Smp_044000	Chr_2	25354941	25363973	9.032		15133	16183	18474	13351	2225	2485	1580	1851	1473	3894													Smp_044000	57.1643	62.9337	73.7971	54.0821	55.0147	57.9658	54.2989	56.468	68.8021	61.8214
Smp_044010	Chr_2	25325316	25347247	21.931		27137	29494	19072	11113	12242	13851	1013	1025	1026	32395													Smp_044010	42.217	47.2371	31.3762	18.5394	124.66	133.061	14.3374	12.8779	19.7366	211.81
Smp_044020	Chr_2	25313116	25321549	8.433		1187	1056	1408	1520	45	59	37	53	29	87													Smp_044020	4.80233	4.39835	6.02397	6.59455	1.19169	1.47401	1.36188	1.73171	1.45077	1.47933
Smp_044060	Chr_2	25156156	25186236	30.08		204	199	446	468	53	65	6	14	3	143													Smp_044060	0.231385	0.232372	0.534957	0.569235	0.393487	0.455266	0.0619144	0.128242	0.0420752	0.681687
Smp_044160	Chr_3	9435096	9453799	18.703		1260	1300	2119	2896	282	385	136	146	145	644													Smp_044160	2.29849	2.44141	4.08773	5.66514	3.36721	4.3369	2.25707	2.15091	3.27069	4.93744
Smp_044250	Chr_3	9205728	9208019	2.291		1283	1364	2428	3055	380	474	322	305	271	896													Smp_044250	19.1067	20.9121	38.2372	48.7876	37.0417	43.5896	43.6264	36.6822	49.9031	56.0803
Smp_044260	Chr_3	9183675	9199106	15.431		970	902	1567	1485	114	175	68	99	74	234													Smp_044260	2.14467	2.05315	3.66385	3.52092	1.64985	2.38932	1.36783	1.76775	2.02312	2.17445
Smp_044280	Chr_2	27478805	27480065	1.26		8451	8262	5492	5033	687	453	1198	1294	404	465													Smp_044280	228.834	230.315	157.261	146.144	121.764	75.7456	295.124	282.972	135.268	52.9187
Smp_044400	Chr_2	27837577	27839456	1.879		1090	1219	1080	846	60	39	79	76	51	91													Smp_044400	19.7917	22.7869	20.7376	16.4728	7.13111	4.37288	13.0502	11.1447	11.4505	6.94451
Smp_044440	Chr_ZW	14107133	14116576	9.443		6308	6483	2427	2670	631	635	227	222	111	537													Smp_044440	22.7911	24.1143	9.27304	10.3449	14.9229	14.1675	7.46164	6.47774	4.95902	8.15439
Smp_044470	Chr_ZW	13912491	13937975	25.484		1460	1529	1046	1075	237	277	56	64	45	315													Smp_044470	1.95465	2.1074	1.4809	1.54335	2.07689	2.29003	0.682085	0.691979	0.744951	1.77243
Smp_044520	Chr_ZW	13270619	13272833	2.214		1077	902	697	667	209	283	73	89	46	356													Smp_044520	16.5967	14.3099	11.3584	11.0223	21.0815	26.9301	10.2344	11.0762	8.76523	23.0568
Smp_044530	Chr_ZW	13239715	13253616	13.901		5574	6421	3716	3764	1168	1083	320	434	231	1358													Smp_044530	13.6806	16.2242	9.64477	9.90666	18.7642	16.4139	7.14533	8.60249	7.0105	14.0082
Smp_044550	Chr_ZW	13215655	13218322	2.667		37593	48633	20371	10216	4181	4093	2797	3047	2697	5683													Smp_044550	480.914	640.495	275.582	140.146	350.098	323.332	325.527	314.796	426.62	305.55
Smp_044560	Chr_ZW	13177615	13178223	0.608		1974	1659	1284	1022	952	1001	368	354	209	1247													Smp_044560	110.771	95.8409	76.1945	61.4994	349.676	346.865	187.872	160.428	145.019	294.097
Smp_044580	Chr_ZW	13135095	13135702	0.607		39144	25742	19939	22408	2216	2045	2514	2818	937	2244													Smp_044580	2200.19	1489.57	1185.16	1350.64	815.293	709.797	1285.57	1279.18	651.229	530.104
Smp_044610	Chr_ZW	12854272	12854601	0.329		46	82	58	40	4	3	3	0	3	5													Smp_044610	4.7703	8.75439	6.36054	4.44824	2.71517	1.92112	2.83037	0	3.84688	2.17922
Smp_044680	SC_0062	1048509	1055252	6.743		5888	7154	6478	4926	1633	1520	580	694	407	1867													Smp_044680	29.7919	37.2652	34.6617	26.7279	54.0836	47.4919	26.6989	28.3587	25.4639	39.7025
Smp_044690	Chr_5	4134236	4147889	13.653		903	1159	1256	1078	166	171	175	228	74	254													Smp_044690	2.25654	2.9817	3.31913	2.88878	2.71527	2.63875	3.97858	4.60137	2.28658	2.66767
Smp_044750	Chr_5	4290646	4347519	56.873		1429	1096	2168	2196	750	1042	113	95	109	1287													Smp_044750	0.857254	0.676881	1.37536	1.4127	2.94502	3.86003	0.616723	0.460254	0.808543	3.24489
Smp_044770	Chr_2	9285933	9287704	1.771		8635	7676	7422	8167	542	568	391	433	287	782													Smp_044770	166.352	152.238	151.204	168.72	68.346	67.5708	68.5293	67.3674	68.367	63.3163
Smp_044800	Chr_2	9340232	9371791	31.559		128	197	403	373	19	14	7	17	8	55													Smp_044800	0.138379	0.219256	0.460727	0.432424	0.134451	0.0934618	0.0688483	0.148425	0.106942	0.2499
Smp_044810	Chr_2	9375390	9386129	10.739		3777	5273	3971	2888	436	347	254	370	357	622													Smp_044810	11.9996	17.2465	13.3413	9.83914	9.06683	6.80762	7.34155	9.49332	14.0245	8.30527
Smp_044820	Chr_2	9389032	9390988	1.956		128	121	402	621	60	59	37	41	33	169													Smp_044820	2.23267	2.17282	7.41514	11.6157	6.85039	6.35496	5.87153	5.77558	7.11751	12.3892
Smp_044850	Chr_2	9524835	9532223	7.388		695	585	1795	2287	207	116	146	132	98	304													Smp_044850	3.20953	2.78123	8.76597	11.3256	6.25714	3.30796	6.134	4.92297	5.59606	5.9003
Smp_044870	Chr_2	9571438	9573156	1.718		397	515	574	461	42	118	90	107	70	191													Smp_044870	7.88408	10.5291	12.0545	9.81751	5.45957	14.4707	16.2606	17.1609	17.1893	15.9418
Smp_044920	SC_0259	34748	67993	33.245		2922	4627	4694	2012	853	913	404	418	333	1122													Smp_044920	2.99873	4.88856	5.09423	2.21424	5.73001	5.78594	3.77201	3.46442	4.22572	4.83942
Smp_044950	Chr_ZW	47750993	47760529	9.536		0	0	0	0	0	0	0	0	0	0													Smp_044950	0	0	0	0	0	0	0	0	0	0
Smp_044970	Chr_ZW	47678827	47706909	28.082		12246	16173	13276	10277	2976	3171	1055	1296	862	4143													Smp_044970	14.8782	20.2288	17.057	13.3894	23.6667	23.7902	11.6612	12.7162	12.9498	21.155
Smp_045010	Chr_ZW	13820166	13832953	12.787		1963	1139	2243	3315	143	212	154	148	101	293													Smp_045010	5.23764	3.12869	6.32882	9.48503	2.49747	3.49299	3.73827	3.18914	3.33224	3.28569
Smp_045040	Chr_ZW	13665414	13680430	15.016		2132	2707	2762	2778	1018	933	743	924	755	1378													Smp_045040	4.84414	6.33202	6.63639	6.76864	15.14	13.0905	15.3586	16.955	21.2117	13.159
Smp_045060	Chr_ZW	13705663	13719880	14.217		4183	5047	4355	3086	168	160	203	266	180	226													Smp_045060	10.0384	12.469	11.052	7.94167	2.63897	2.37105	4.43207	5.1553	5.34131	2.27944
Smp_045070	Chr_ZW	13732943	13739208	6.265		1784	2454	1837	2451	212	245	191	211	137	319													Smp_045070	9.71533	13.7582	10.5791	14.3135	7.55696	8.239	9.46303	9.27986	9.22534	7.30124
Smp_045200	Chr_ZW	13770968	13777135	6.167		33779	18874	52319	78595	5306	6158	576	829	757	10472													Smp_045200	186.877	107.497	306.089	466.278	192.144	210.376	28.9912	37.0391	51.7851	243.491
Smp_045220	Chr_2	11821636	11826170	4.534		15240	10957	14040	9293	4488	5080	340	431	384	10427													Smp_045220	114.68	84.8825	111.724	74.9891	221.057	236.054	23.2764	26.1924	35.73	329.765
Smp_045230	Chr_2	11795879	11811680	15.801		1125	1107	2040	2663	282	270	131	141	133	541													Smp_045230	2.42913	2.46077	4.65809	6.1661	3.98563	3.60005	2.57339	2.45875	3.55099	4.90953
Smp_045250	Chr_2	11771705	11794875	23.17		2768	3006	3285	2323	229	252	211	214	189	326													Smp_045250	4.0759	4.55691	5.11531	3.66815	2.2072	2.29142	2.82667	2.54488	3.44127	2.01752
Smp_045260	Chr_2	11750749	11771612	20.863		2780	2971	3009	2281	472	530	199	215	180	690													Smp_045260	4.54623	5.00189	5.20364	4.00011	5.0524	5.35215	2.9607	2.8395	3.63981	4.74241
Smp_045300	Chr_2	11681872	11701112	19.24		1236	839	980	559	289	263	30	35	26	583													Smp_045300	2.19178	1.53167	1.83774	1.06299	3.35448	2.87992	0.483988	0.501237	0.5701	4.34501
Smp_045310	Chr_2	11636916	11670814	33.898		2475	2771	3929	2950	329	340	159	154	92	717													Smp_045310	2.49106	2.87125	4.18187	3.18399	2.16748	2.11317	1.45593	1.25178	1.14498	3.033
Smp_045330	Chr_2	11543713	11544671	0.958		9	7	14	1	0	2	0	0	0	1													Smp_045330	0.320524	0.25665	0.52726	0.0381908	0	0.439839	0	0	0	0.149679
Smp_045360	Chr_2	11363317	11431065	67.748		3589	5104	7822	5395	1635	1583	136	185	151	2619													Smp_045360	1.80743	2.6462	4.16566	2.91352	5.38957	4.92282	0.623104	0.752412	0.940293	5.54327
Smp_045400	SC_0037	2287517	2303178	15.661		1965	2262	2841	3475	937	905	425	507	335	1021													Smp_045400	4.28082	5.07319	6.54506	8.11819	13.3614	12.1747	8.4234	8.92008	9.02419	9.34832
Smp_045410	SC_0037	2259542	2270853	11.311		3046	2885	3420	2644	233	219	98	187	105	469													Smp_045410	9.18782	8.95886	10.9091	8.55232	4.60031	4.07918	2.68932	4.55534	3.91626	5.94564
Smp_045420	SC_0037	2246909	2254200	7.291		453	592	913	849	83	73	33	87	37	57													Smp_045420	2.1198	2.85195	4.518	4.26034	2.54228	2.10943	1.4049	3.28785	2.14091	1.12102
Smp_045430	SC_0037	2241519	2245846	4.327		873	705	1181	1778	314	304	193	197	93	223													Smp_045430	6.88353	5.72282	9.84748	15.0338	16.206	14.8019	13.8449	12.5447	9.06732	7.39001
Smp_045470	SC_0037	2123540	2128730	5.19		35	45	205	135	0	0	0	0	0	3													Smp_045470	0.230083	0.304546	1.42511	0.951678	0	0	0	0	0	0.082886
Smp_045480	SC_0037	2079865	2096876	17.011		1252	1886	2694	2503	633	498	203	224	163	745													Smp_045480	2.51107	3.89421	5.71386	5.38338	8.3101	6.16778	3.70411	3.62826	4.04241	6.27991
Smp_045490	Chr_4	4611818	4625468	13.65		0	0	0	0	0	0	0	0	0	0													Smp_045490	0	0	0	0	0	0	0	0	0	0
Smp_045500	Chr_4	4628571	4637840	9.269		598	598	718	680	288	347	147	178	140	526													Smp_045500	2.20116	2.26609	2.79482	2.68411	6.93893	7.88726	4.92269	5.29136	6.37203	8.13729
Smp_045510	Chr_4	4641515	4642093	0.578		0	0	0	0	0	0	0	0	0	0													Smp_045510	0	0	0	0	0	0	0	0	0	0
Smp_045550	Chr_4	4548453	4568563	20.11		1771	1530	2823	3353	2051	2204	289	367	201	3348													Smp_045550	3.00462	2.67231	5.06479	6.10022	22.7765	23.0903	4.46071	5.02845	4.21664	23.8726
Smp_045560	Chr_4	4519381	4536000	16.619		3755	3658	5748	4183	1892	2113	1116	1224	870	2425													Smp_045560	7.70883	7.7312	12.4788	9.20888	25.4243	26.787	20.8438	20.2935	22.085	20.9235
Smp_045590	Chr_5	3591028	3605881	14.853		1313	1769	2907	2798	265	280	176	205	143	470													Smp_045590	3.01602	4.18333	7.06144	6.89219	3.98441	3.97167	3.67804	3.80294	4.06167	4.53744
Smp_045600	Chr_5	3610297	3624564	14.267		88	95	207	216	20	27	15	16	23	73													Smp_045600	0.210443	0.233883	0.52348	0.553917	0.313062	0.398713	0.326345	0.309006	0.680108	0.733698
Smp_045610	Chr_5	3674520	3680348	5.828		14790	15326	15829	16186	2021	2111	889	1015	840	3616													Smp_045610	86.5829	92.3671	97.9932	101.612	77.4425	76.3129	47.3479	47.9873	60.8055	88.9684
Smp_045620	Chr_5	3690258	3702780	12.522		2279	1892	3377	3713	407	415	276	340	238	440													Smp_045620	6.20947	5.30708	9.73015	10.8486	7.25861	6.98239	6.84153	7.48144	8.01837	5.03856
Smp_045640	Chr_5	3775011	3775931	0.92		13	11	8	8	3	1	0	5	2	14													Smp_045640	0.482102	0.419965	0.313736	0.318146	0.728226	0.229003	0	1.49748	0.917118	2.18206
Smp_045650	Chr_5	3789703	3802805	13.102		45	70	175	165	89	82	9	27	15	146													Smp_045650	0.117181	0.187659	0.481906	0.460755	1.517	1.31858	0.213218	0.567814	0.482988	1.59787
Smp_045680	Chr_5	3979589	3981061	1.472		31	13	35	21	10	6	1	0	0	6													Smp_045680	0.718518	0.310201	0.857872	0.521958	1.51714	0.858762	0.210868	0	0	0.584481
Smp_045710	Chr_5	4089472	4095238	5.766		1197	1802	3221	1809	727	867	243	246	252	1096													Smp_045710	7.08277	10.9771	20.1548	11.4786	28.1574	31.6792	13.0813	11.7555	18.4378	27.2561
Smp_045730	Chr_ZW.unplaced.SC_0272	92303	96318	4.015		2851	2801	4008	3619	384	385	303	344	175	441													Smp_045730	24.2268	24.5039	36.0167	32.9782	21.3589	20.2025	23.4248	23.6077	18.388	15.75
Smp_045750	Chr_ZW	36582408	36592011	9.603		1609	1727	1716	1791	175	200	206	270	215	417													Smp_045750	5.71653	6.31675	6.44722	6.82358	4.06971	4.38786	6.65853	7.74706	9.44527	6.22668
Smp_045760	Chr_ZW	36597918	36610637	12.719		451	703	1163	1025	125	119	183	255	205	255													Smp_045760	1.20978	1.94138	3.29905	2.94846	2.19477	1.97117	4.46597	5.52418	6.79961	2.87484
Smp_045780	Chr_ZW	36675863	36688371	12.508		2117	2608	2543	2858	284	235	183	256	218	525													Smp_045780	5.77453	7.32365	7.33535	8.35984	5.07064	3.95831	4.54131	5.63939	7.35278	6.01864
Smp_045790	Chr_ZW	36691181	36699000	7.819		2427	2598	3080	2829	437	553	260	295	275	752													Smp_045790	10.5902	11.6707	14.2122	13.2375	12.4814	14.9006	10.3214	10.3956	14.8376	13.7909
Smp_045810	Chr_ZW	36739905	36747326	7.421		1195	1276	1340	1761	173	195	177	198	124	263													Smp_045810	5.49401	6.03943	6.51485	8.68202	5.20615	5.53607	7.40336	7.35162	7.04924	5.08183
Smp_045860	Chr_ZW	36831340	36851387	20.047		749	1323	1452	999	404	463	143	184	105	452													Smp_045860	1.27472	2.31803	2.61324	1.82322	4.50054	4.86588	2.21414	2.529	2.20965	3.23308
Smp_045920	Chr_ZW	36970787	36972329	1.542		1573	1563	2047	1794	224	196	160	185	96	281													Smp_045920	34.8039	35.6027	47.8956	42.5659	32.4411	26.7794	32.2073	33.0573	26.2645	26.1306
Smp_045930	Chr_ZW	36976676	36981603	4.927		1807	1838	2216	2338	577	637	336	369	199	833													Smp_045930	12.5129	13.103	16.2274	17.3614	26.1533	27.2387	21.1678	20.6359	17.0394	24.2432
Smp_045940	Chr_ZW	36998631	37032186	33.555		15232	16143	13684	9167	2176	2219	344	454	312	3164													Smp_045940	15.4876	16.898	14.7136	9.99525	14.4822	13.9325	3.18214	3.72803	3.92266	13.5209
Smp_045950	Chr_ZW	37031668	37039311	7.643		8057	10292	8072	4769	923	958	601	781	523	1314													Smp_045950	35.9661	47.2981	38.1048	22.829	26.9693	26.4077	24.4078	28.1558	28.8683	24.6524
Smp_045960	Chr_ZW	37045681	37063378	17.697		5359	5527	6344	5147	732	821	281	423	323	1162													Smp_045960	10.3316	10.9698	12.9338	10.6409	9.23728	9.77402	4.92861	6.58599	7.69991	9.41529
Smp_045980	Chr_ZW	37090526	37111405	20.879		1205	1793	1876	1630	550	624	307	379	228	911													Smp_045980	1.96907	3.01633	3.24179	2.85629	5.88282	6.29658	4.56401	5.00161	4.60689	6.25656
Smp_045990	Chr_ZW	37187666	37198972	11.306		21	21	60	19	7	1	1	2	1	9													Smp_045990	0.0633715	0.0652407	0.191472	0.0614849	0.138268	0.0186346	0.0274542	0.0487418	0.0373142	0.114146
Smp_046000	Chr_ZW	37200467	37203967	3.5		248	166	360	442	30	29	10	2	5	53													Smp_046000	2.4175	1.6659	3.71105	4.62038	1.91419	1.74566	0.88685	0.15745	0.602677	2.17138
Smp_046020	Chr_ZW	37242453	37250834	8.381		5913	5249	10231	8594	768	901	319	421	352	1621													Smp_046020	24.0711	21.9983	44.0438	37.5166	20.4644	22.6495	11.8144	13.841	17.7186	27.7341
Smp_046030	Chr_ZW	37251553	37274348	22.795		1841	1184	1460	2339	179	220	49	89	89	392													Smp_046030	2.75548	1.8244	2.31087	3.75417	1.75366	2.03335	0.667229	1.0758	1.64715	2.46589
Smp_046040	Chr_ZW	37287782	37287832	0.05		0	0	0	0	0	0	0	0	0	0													Smp_046040	0	0	0	0	0	0	0	0	0	0
Smp_046060	Chr_ZW	37332678	37366703	34.025		9962	15217	16691	12998	6937	7761	1878	2242	1670	11640													Smp_046060	9.98923	15.7087	17.6989	13.9766	45.5309	48.0562	17.1323	18.1559	20.7062	49.0548
Smp_046090	Chr_ZW	37387479	37401436	13.957		33815	37024	24747	17628	2066	1362	2641	3226	1525	2116													Smp_046090	82.661	93.175	63.9724	46.2099	33.0576	20.5596	58.7347	63.6873	46.0957	21.7396
Smp_046100	Chr_ZW	37421571	37430908	9.337		7843	5975	4998	4607	1066	1213	598	668	449	1581													Smp_046100	28.6588	22.477	19.3131	18.0524	25.4966	27.3705	19.8798	19.7128	20.2872	24.2802
Smp_046120	Chr_ZW	37502210	37503829	1.619		394	540	559	99	21	21	2	2	4	58													Smp_046120	8.30296	11.7153	12.4574	2.23724	2.89671	2.73276	0.383443	0.340379	1.04231	5.13698
Smp_046130	Chr_ZW	37543581	37555113	11.532		1538	1688	2939	1917	347	436	229	227	187	565													Smp_046130	4.55025	5.14133	9.19511	6.08193	6.71982	7.96547	6.16381	5.42377	6.84101	7.0254
Smp_046140	Chr_ZW	37555323	37582521	27.198		2289	2921	2612	1949	705	768	390	434	397	1375													Smp_046140	2.87139	3.77227	3.46496	2.62179	5.78875	5.94913	4.45088	4.39676	6.15795	7.24925
Smp_046160	Chr_ZW	37634729	37640362	5.633		1052	1203	1676	1093	282	324	151	176	138	547													Smp_046160	6.37176	7.50125	10.7349	7.09911	11.18	12.1181	8.32061	8.60901	10.3353	13.9243
Smp_046180	Chr_2	32839194	32840242	1.048		9	6	6	2	0	0	0	1	0	1													Smp_046180	0.292998	0.201093	0.206563	0.069822	0	0	0	0.262917	0	0.136825
Smp_046190	Chr_2	32855275	32865774	10.499		919	985	1685	2075	571	560	262	332	221	926													Smp_046190	2.98642	3.29531	5.79047	7.23093	12.1457	11.2375	7.74589	8.71305	8.88029	12.6471
Smp_046250	Chr_2	33272435	33273488	1.053		7926	7143	7292	8060	450	402	558	777	361	522													Smp_046250	256.808	238.265	249.851	280.047	95.437	80.4317	164.484	203.317	144.631	71.0836
Smp_046280	Chr_6	14885622	14904776	19.154		666	1760	1443	616	40	59	90	117	47	74													Smp_046280	1.18631	3.22746	2.71812	1.17664	0.466373	0.648966	1.45848	1.68309	1.03519	0.553987
Smp_046290	Chr_6	14916365	14923668	7.303		14381	14909	12745	9765	2354	2572	1353	1557	1030	3771													Smp_046290	67.1849	71.7059	62.9652	48.9209	71.9843	74.1992	57.5062	58.7445	59.5003	74.0427
Smp_046360	Chr_6	15062833	15064735	1.902		259	288	721	514	90	160	26	38	45	236													Smp_046360	4.64593	5.31851	13.6769	9.88727	10.5673	17.7231	4.24308	5.50495	9.98125	17.7922
Smp_046410	Chr_6	15223832	15229964	6.132		104	142	337	239	95	126	62	64	78	201													Smp_046410	0.578648	0.813381	1.98285	1.426	3.45982	4.3291	3.1384	2.8758	5.36631	4.70025
Smp_046430	Chr_6	15281088	15308685	27.597		1168	1437	2418	2212	326	309	195	240	133	377													Smp_046430	1.44399	1.82895	3.16123	2.93256	2.63808	2.35899	2.19326	2.39624	2.03317	1.95887
Smp_046450	SC_0182	113634	121377	7.743		2489	2490	4111	5334	387	334	193	212	253	833													Smp_046450	10.9673	11.2953	19.1558	25.2039	11.1618	9.08797	7.73689	7.54409	13.7846	15.4263
Smp_046500	Chr_6	6149762	6150776	1.014		13403	14034	12818	9917	410	408	575	754	306	400													Smp_046500	450.97	486.129	456.084	357.821	90.2981	84.7719	176.014	204.887	127.311	56.5652
Smp_046550	Chr_6	6195085	6205710	10.625		2557	2445	2867	2713	124	170	146	195	156	234													Smp_046550	8.2108	8.08273	9.73556	9.3421	2.60631	3.37093	4.26523	5.05692	6.19411	3.15801
Smp_046600	Chr_6	6381147	6382476	1.329		120945	113979	71270	60280	5319	5243	2766	2929	1503	5413													Smp_046600	3104.89	3012.37	1934.84	1659.48	893.794	831.16	646.019	607.26	477.108	584.037
Smp_046630	Chr_6	6461972	6465791	3.819		4780	4896	7027	2329	1988	3612	709	664	494	3226													Smp_046630	42.7033	45.0298	66.3869	22.3123	116.252	199.263	57.6255	47.907	54.5708	121.127
Smp_046640	Chr_2	20800498	20814586	14.088		154	174	490	299	24	50	3	0	2	100													Smp_046640	0.372954	0.433818	1.2549	0.776507	0.380447	0.747739	0.0660983	0	0.0598913	1.01784
Smp_046650	Chr_2	20789617	20790330	0.713		3	4	19	7	8	6	1	0	0	14													Smp_046650	0.143554	0.197051	0.961449	0.359197	2.50572	1.77293	0.43534	0	0	2.81557
Smp_046680	Chr_2	20650202	20667573	17.371		2909	2792	2886	3026	235	239	190	235	157	389													Smp_046680	5.7135	5.64545	5.99423	6.37335	3.02117	2.8987	3.39506	3.72755	3.81292	3.21109
Smp_046690	Chr_2	20621340	20638774	17.434		48969	34355	32377	30487	22585	24254	9900	7636	3592	18848													Smp_046690	95.8314	69.2151	67.0042	63.9796	289.305	293.1	176.261	120.684	86.9205	155.023
Smp_046740	Chr_2	20370900	20382056	11.156		9642	11265	8496	6110	1387	1261	1019	1266	545	1306													Smp_046740	29.4878	35.4675	27.4769	20.0381	27.7652	23.8142	28.352	31.2684	20.6097	16.7866
Smp_046750	Chr_2	20357214	20358597	1.383		1437	1439	2145	2583	192	260	164	162	122	294													Smp_046750	35.4502	36.5466	55.9587	68.3323	31.0036	39.6078	36.8078	32.2755	37.2152	30.4826
Smp_046780	Chr_2	20209163	20209951	0.788		7064	6659	5702	3605	425	338	199	266	68	184													Smp_046780	305.85	296.818	261.074	167.38	120.447	90.3691	78.3872	93.0113	36.4054	33.4826
Smp_046790	Chr_2	20120262	20137197	16.935		447	488	851	1012	119	168	96	94	53	235													Smp_046790	0.900546	1.01214	1.81304	2.18635	1.56926	2.09004	1.75956	1.52941	1.3203	1.9898
Smp_046800	Chr_2	20095441	20106776	11.335		2123	1886	2204	1311	301	353	55	70	36	674													Smp_046800	6.39017	5.84424	7.0154	4.2316	5.93031	6.56119	1.50612	1.7016	1.33987	8.5264
Smp_046810	Chr_2	20049296	20057095	7.799		2260	3607	4244	3271	286	323	172	278	131	451													Smp_046810	9.88674	16.2448	19.6335	15.3449	8.18954	8.72556	6.84554	9.82169	7.08623	8.2921
Smp_046870	Chr_2	19695570	19699238	3.668		6605	5546	5563	6152	328	288	180	247	114	485													Smp_046870	61.4366	53.1078	54.7195	61.3636	19.97	16.5422	15.2322	18.5544	13.1117	18.9601
Smp_046880	Chr_2	19707023	19727533	20.51		1809	1779	2460	2644	221	261	115	153	122	402													Smp_046880	3.00924	3.04662	4.32745	4.7165	2.40635	2.68105	1.7404	2.05545	2.50944	2.81053
Smp_046890	Chr_2	19742216	19754428	12.212		526	697	1647	1202	296	281	130	198	135	512													Smp_046890	1.46954	2.00472	4.86597	3.60115	5.41299	4.84785	3.30426	4.46744	4.66369	6.01188
Smp_046900	Chr_2	19807187	19815778	8.591		559	835	1178	1230	249	286	180	168	91	307													Smp_046900	2.21999	3.4139	4.94725	5.23824	6.47274	7.01378	6.5035	5.38823	4.46869	5.12415
Smp_046910	Chr_2	19817387	19817665	0.278		437	486	890	806	25	17	28	37	28	33													Smp_046910	53.6315	61.4044	115.507	106.075	20.083	12.8835	31.2631	36.6722	42.4909	17.0214
Smp_046930	Chr_2	19882391	19886294	3.903		33046	34367	34677	40404	6356	5769	2903	3052	2059	7454													Smp_046930	288.871	309.279	320.557	378.747	363.679	311.409	230.87	215.46	222.557	273.853
Smp_046980	Chr_ZW	29181128	29183932	2.804		3603	2977	1740	2068	137	158	46	71	80	293													Smp_046980	43.8399	37.2914	22.3889	26.9834	10.9113	11.8716	5.09211	6.97687	12.0364	14.9836
Smp_047020	Chr_ZW	29034207	29034827	0.62		173	48	156	310	14	28	6	2	4	93													Smp_047020	9.52002	2.7193	9.0781	18.2934	5.04277	9.51472	3.00385	0.88883	2.72177	21.5089
Smp_047060	Chr_ZW	28888532	28896035	7.503		7912	4696	2285	2765	251	273	73	97	41	489													Smp_047060	35.9778	21.9837	10.9879	13.4829	7.47087	7.6658	3.01999	3.56219	2.30532	9.34547
Smp_047090	Chr_ZW	28791866	28797267	5.401		2792	1954	1451	1816	244	334	47	74	64	402													Smp_047090	17.637	12.7074	9.69294	12.3017	10.089	13.0287	2.70111	3.77518	4.99906	10.6728
Smp_047100	Chr_ZW	28767209	28786106	18.897		1129	1179	997	811	433	549	76	79	42	618													Smp_047100	2.03838	2.19144	1.90355	1.57019	5.11714	6.12081	1.24836	1.1519	0.937647	4.68946
Smp_047110	Chr_ZW	28756968	28767720	10.752		5645	5636	2634	2191	411	338	175	237	127	556													Smp_047110	17.9126	18.4115	8.83871	7.4555	8.5366	6.62303	5.05204	6.0735	4.98307	7.41503
Smp_047180	Chr_ZW	28606676	28609225	2.549		83	62	78	135	51	69	3	3	1	98													Smp_047180	1.11094	0.854338	1.10405	1.9377	4.4682	5.70307	0.365317	0.324289	0.165506	5.51294
Smp_047190	Chr_ZW	28551975	28593575	41.6		1190	1833	2929	2312	465	516	214	282	219	799													Smp_047190	0.975972	1.54767	2.54032	2.03338	2.49627	2.61328	1.59676	1.86782	2.22092	2.75411
Smp_047200	Chr_ZW	28525276	28526752	1.476		70871	63288	50390	46852	2038	1903	2993	3439	3549	3951													Smp_047200	1638.2	1506.06	1231.74	1161.36	308.355	271.633	629.417	641.987	1014.38	383.838
Smp_047240	Chr_ZW	29337688	29342834	5.146		28	51	103	74	16	23	1	1	0	21													Smp_047240	0.18564	0.348103	0.722154	0.526121	0.694357	0.941646	0.0603182	0.053544	0	0.585163
Smp_047320	Chr_ZW	29474056	29476120	2.064		147	285	245	227	84	80	53	37	76	189													Smp_047320	2.42992	4.85002	4.28271	4.02383	9.08871	8.16601	7.97048	4.93938	15.5341	13.1304
Smp_047330	Chr_ZW	29503387	29512515	9.128		337	359	387	534	130	126	37	42	22	201													Smp_047330	1.25962	1.38142	1.52967	2.14037	3.18054	2.9082	1.25818	1.26781	1.01679	3.15753
Smp_047360	Chr_2	9065093	9080828	15.735		2532	2763	3403	3392	946	1026	403	466	320	1232													Smp_047360	5.4901	6.16768	7.80292	7.88702	13.4263	13.7376	7.9498	8.16017	8.57958	11.2272
Smp_047370	Chr_2	9050046	9057960	7.914		13565	18100	17323	10163	3085	2744	1778	2285	1303	5177													Smp_047370	58.48	80.3324	78.9749	46.984	87.0546	73.0496	69.7355	79.5555	69.4594	93.8014
Smp_047400	Chr_2	8944757	8947421	2.664		408	473	641	528	84	86	38	66	55	92													Smp_047400	5.22528	6.23641	8.68133	7.25143	7.0417	6.80133	4.42759	6.82637	8.70986	4.952
Smp_047410	Chr_2	8936375	8940206	3.831		832	778	1149	1501	147	166	68	98	54	353													Smp_047410	7.4096	7.13305	10.8211	14.3348	8.56915	9.12905	5.50953	7.04846	5.94654	13.2126
Smp_047420	Chr_2	8928718	8933126	4.408		636	1037	1081	594	222	272	97	122	94	480													Smp_047420	4.92265	8.26314	8.84802	4.93025	11.2472	13.0004	6.83043	7.62603	8.99641	15.6145
Smp_047440	Chr_2	8891057	8897423	6.366		1715	2151	2972	2293	108	135	91	133	70	232													Smp_047440	9.19139	11.8681	16.844	13.1784	3.7887	4.46783	4.43704	5.75659	4.63889	5.22575
Smp_047450	Chr_2	8870353	8879182	8.829		2991	3179	4015	3609	244	279	187	170	145	399													Smp_047450	11.5582	12.647	16.4073	14.9554	6.17179	6.65767	6.57428	5.30539	6.9285	6.4802
Smp_047460	Chr_2	8832642	8863532	30.89		302	436	756	439	330	331	26	33	15	515													Smp_047460	0.333559	0.495766	0.883011	0.51996	2.38577	2.25756	0.26126	0.294358	0.20486	2.39065
Smp_047500	Chr_2	8744524	8751644	7.12		1158	1371	1315	1313	120	174	126	129	75	303													Smp_047500	5.54897	6.76341	6.66359	6.74696	3.76386	5.14871	5.49299	4.99218	4.4439	6.10225
Smp_047540	Chr_2	8670169	8710521	40.352		731	820	1296	1269	73	93	73	85	101	264													Smp_047540	0.618068	0.713767	1.15878	1.15059	0.404008	0.485565	0.561534	0.580409	1.05594	0.938136
Smp_047550	Chr_2	8658996	8661682	2.686		52	48	153	143	30	28	3	8	1	53													Smp_047550	0.660512	0.627687	2.05517	1.94784	2.4943	2.19625	0.346684	0.820662	0.157064	2.82942
Smp_047570	Chr_2	8620772	8621493	0.721		1509	1409	908	795	116	105	100	122	66	140													Smp_047570	71.4065	68.641	45.4373	40.3418	35.9298	30.682	43.051	46.6235	38.6182	27.8432
Smp_047610	Chr_2	8530011	8541268	11.257		302	334	555	508	10	10	44	70	29	13													Smp_047610	0.915309	1.04215	1.77882	1.65107	0.198385	0.187157	1.21324	1.71339	1.08682	0.165595
Smp_047620	Chr_2	8502927	8516298	13.371		606	1085	1254	624	24	52	179	165	137	54													Smp_047620	1.54629	2.85019	3.38373	1.70744	0.400848	0.819349	4.15535	3.40017	4.32255	0.579105
Smp_047640	Chr_2	8459549	8461933	2.384		117	139	311	140	106	117	43	71	27	119													Smp_047640	1.67442	2.04794	4.7067	2.14855	9.92961	10.3397	5.59861	8.20602	4.77794	7.15761
Smp_047650	Chr_2	8449112	8451986	2.874		3029	2482	5459	3261	780	1275	390	369	340	1398													Smp_047650	35.958	30.3335	68.5312	41.5133	60.6095	93.4658	42.1207	35.3769	49.9086	69.7505
Smp_047660	Chr_2	8431998	8433970	1.972		1092	1074	1970	1298	639	1379	355	298	217	1103													Smp_047660	18.8929	19.1296	36.043	24.0819	72.3647	147.329	55.8778	41.638	46.4233	80.2039
Smp_047680	Chr_2	8424075	8425073	0.998		643	678	1339	836	293	610	130	106	91	421													Smp_047680	21.9818	23.862	48.4075	30.6478	65.5646	128.774	40.4325	29.2655	38.4675	60.4893
Smp_047700	Chr_2	8370342	8393565	23.223		216	286	302	238	256	185	105	110	112	328													Smp_047700	0.317336	0.432569	0.469192	0.374958	2.46181	1.67835	1.40342	1.30513	2.03462	2.02527
Smp_047720	Chr_3.unplaced.SC_0124	644566	666328	21.762		589	897	1666	1182	49	42	99	110	65	60													Smp_047720	0.923422	1.44778	2.76209	1.9872	0.50284	0.406612	1.41206	1.39275	1.26008	0.395348
Smp_047740	SC_0302	35837	37055	1.218		7227	5200	6742	7759	601	759	480	596	295	655													Smp_047740	202.439	149.956	199.712	233.068	110.194	131.288	122.324	134.828	102.178	77.1118
Smp_047850	Chr_2	30361627	30367848	6.221		0	0	0	0	1	0	0	0	0	0													Smp_047850	0	0	0	0	0.0358982	0	0	0	0	0
Smp_047860	Chr_2	30377996	30387454	9.458		1733	1822	1601	1560	151	161	102	153	84	198													Smp_047860	6.25148	6.76639	6.10737	6.03461	3.56542	3.58638	3.34749	4.45731	3.74682	3.00188
Smp_047870	Chr_2	30393238	30412956	19.718		1484	1091	3387	4051	573	770	87	111	124	889													Smp_047870	2.56776	1.94343	6.19747	7.51663	6.4897	8.2273	1.36954	1.5511	2.65303	6.46496
Smp_047900	Chr_2	30516145	30533819	17.674		1819	1908	2513	2587	351	363	104	134	100	595													Smp_047900	3.51141	3.79185	5.13003	5.35532	4.43511	4.32714	1.82649	2.08906	2.38698	4.82735
Smp_048030	Chr_2	31230801	31231667	0.866		4	8	11	13	3	1	1	0	1	11													Smp_048030	0.157589	0.324474	0.458286	0.549224	0.773635	0.243283	0.358427	0	0.487153	1.82139
Smp_048040	Chr_2	31239037	31251844	12.807		41	12	47	48	5	8	1	0	0	11													Smp_048040	0.109224	0.0329111	0.132408	0.137125	0.0871877	0.131605	0.0242365	0	0	0.123161
Smp_048050	Chr_1	48987956	48989881	1.925		25	45	3	2	7	17	0	0	0	39													Smp_048050	0.443091	0.821088	0.056228	0.0380122	0.812082	1.86058	0	0	0	2.9051
Smp_048060	Chr_1	48990993	48991139	0.146		0	0	0	0	0	0	0	0	0	0													Smp_048060	0	0	0	0	0	0	0	0	0	0
Smp_048080	Chr_1	48204848	48234070	29.222		349	483	787	640	58	59	49	81	56	105													Smp_048080	0.407473	0.580557	0.971688	0.801297	0.443252	0.425375	0.52048	0.763757	0.808465	0.515236
Smp_048160	Chr_1	48573373	48591569	18.196		1573	2690	3654	2612	637	820	336	356	441	1051													Smp_048160	2.94942	5.19259	7.24527	5.25195	7.81801	9.4944	5.73167	5.39081	10.2246	8.28236
Smp_048230	Chr_1	48826385	48841526	15.141		1426	1510	1769	1804	775	882	565	455	374	1371													Smp_048230	3.21328	3.50292	4.21537	4.35919	11.4309	12.2728	11.5828	8.28013	10.4208	12.984
Smp_048240	Chr_1	48855932	48874863	18.931		3069	3135	3316	3318	455	489	455	507	225	594													Smp_048240	5.53104	5.81664	6.3198	6.41249	5.36748	5.44208	7.46029	7.37929	5.01409	4.49925
Smp_048260	Chr_1	48926644	48937274	10.63		5587	3853	5525	7346	350	344	276	369	237	549													Smp_048260	17.932	12.7313	18.7526	25.2837	7.35305	6.81796	8.05924	9.56474	9.40585	7.4057
Smp_048270	Chr_1	48937395	48940665	3.27		850	700	955	1237	95	100	81	77	100	156													Smp_048270	8.86859	7.51897	10.537	13.8403	6.48796	6.44291	7.68874	6.48818	12.9014	6.84075
Smp_048310	Chr_1	46586121	46609109	22.988		3420	2645	5164	9261	126	126	109	146	87	245													Smp_048310	5.07585	4.04141	8.10489	14.7394	1.22406	1.15478	1.47178	1.74998	1.59662	1.52824
Smp_048380	Chr_1	46743553	46757361	13.808		62	53	127	57	49	29	2	2	8	63													Smp_048380	0.153195	0.13482	0.331845	0.151032	0.792497	0.442483	0.0449591	0.0399098	0.244423	0.65424
Smp_048420	Chr_1	46916158	46925448	9.29		1883	1563	2797	3139	411	427	263	274	210	588													Smp_048420	6.91541	5.90951	10.8627	12.3623	9.88004	9.68371	8.78736	8.12672	9.53645	9.07588
Smp_048430	Chr_1	46937472	46963633	26.161		12614	13861	16677	13069	2094	2852	2436	2917	1951	2639													Smp_048430	16.4506	18.6101	22.9999	18.2773	17.8754	22.9681	28.9029	30.7229	31.462	14.4648
Smp_048520	Chr_ZW	20338534	20348419	9.885		2207	2193	2638	2534	177	155	128	178	119	369													Smp_048520	7.61744	7.79238	9.62854	9.37894	3.9988	3.30358	4.01931	4.96162	5.07871	5.35275
Smp_048540	Chr_ZW	20288631	20299140	10.509		483	388	568	903	91	95	75	150	94	173													Smp_048540	1.56808	1.29682	1.95007	3.14376	1.9338	1.90455	2.21523	3.93287	3.77354	2.36054
Smp_048550	Chr_ZW	20277066	20281004	3.938		353	592	1091	1020	142	184	95	134	77	263													Smp_048550	3.05832	5.28024	9.99565	9.4765	8.05277	9.844	7.488	9.37582	8.24894	9.57651
Smp_048560	Chr_ZW	20185280	20196239	10.959		15130	11016	9438	7712	1505	1470	124	180	137	2874													Smp_048560	47.1033	35.307	31.0721	25.7466	30.6689	28.2602	3.51212	4.52566	5.27391	37.6048
Smp_048620	Chr_ZW	19924267	19935558	11.291		1424	1602	2119	1340	115	173	73	87	102	203													Smp_048620	4.3029	4.98354	6.77112	4.34206	2.27456	3.22807	2.00682	2.12308	3.8111	2.57805
Smp_048650	Chr_ZW	19845555	19846064	0.509		6144	4376	3800	3945	228	215	246	256	177	342													Smp_048650	411.829	301.973	269.357	283.565	100.034	88.9918	150.015	138.581	146.703	96.3464
Smp_048660	Chr_ZW	19826813	19833688	6.875		6731	6930	8090	6036	401	400	517	646	514	622													Smp_048660	33.4034	35.4053	42.4559	32.1218	13.0258	12.2579	23.3419	25.8905	31.5408	12.9731
Smp_048680	Chr_ZW	19670210	19671625	1.415		270	324	500	422	32	61	11	10	15	108													Smp_048680	6.51015	8.0426	12.749	10.9114	5.0504	9.08245	2.41298	1.94726	4.47216	10.9445
Smp_048690	Chr_4	16322182	16323192	1.01		156	187	311	238	116	153	16	26	17	175													Smp_048690	5.26971	6.50322	11.1097	8.62143	25.6489	31.9153	4.91719	7.09304	7.10085	24.8453
Smp_048760	Chr_2	13249483	13258212	8.729		1582	1485	2468	2406	252	260	140	154	84	367													Smp_048760	6.18338	5.97544	10.201	10.0845	6.44716	6.27536	4.97831	4.86112	4.05974	6.02877
Smp_048830	Chr_2	13498779	13503599	4.82		6649	5177	4634	4641	1080	1223	845	839	373	843													Smp_048830	47.0644	37.7259	34.6874	35.228	50.0391	53.4575	54.4161	47.9618	32.6471	25.0789
Smp_048870	Chr_2	13653727	13654119	0.392		352	270	297	332	154	116	108	132	117	164													Smp_048870	30.6366	24.1928	27.3359	30.9867	87.7339	62.345	85.5177	92.7829	125.917	59.9908
Smp_048880	Chr_2	13654224	13660782	6.558		1406	1177	1727	2093	426	425	294	353	137	359													Smp_048880	7.31472	6.30395	9.5013	11.6767	14.5068	13.6536	13.9153	14.8314	8.81317	7.84965
Smp_048930	Chr_2	13738265	13747618	9.353		142	141	238	255	6	15	19	11	16	29													Smp_048930	0.51799	0.529512	0.918096	0.9975	0.143263	0.337886	0.630552	0.324057	0.721692	0.444605
Smp_048940	Chr_2	13753927	13760840	6.913		1910	1480	3119	2475	354	390	179	240	162	636													Smp_048940	9.4265	7.51975	16.2784	13.0988	11.4359	11.8858	8.0372	9.56588	9.88625	13.1922
Smp_048970	Chr_2	13817568	13822358	4.79		2199	2315	2350	2426	205	248	193	202	166	410													Smp_048970	15.6629	16.9755	17.7009	18.5302	9.55765	10.908	12.5066	11.6197	14.6203	12.2737
Smp_048980	Chr_2	13835737	13870202	34.465		773	1449	2277	1296	596	572	159	210	131	1123													Smp_048980	0.765217	1.47672	2.38367	1.37578	3.8619	3.49661	1.43198	1.67889	1.60353	4.67228
Smp_048990	Chr_2	13878756	13892508	13.752		1082	1244	1842	1882	278	256	156	168	102	322													Smp_048990	2.68439	3.17733	4.83266	5.007	4.51452	3.92196	3.52109	3.36607	3.12908	3.35751
Smp_049000	Chr_2	13893980	13914215	20.235		999	875	1987	4055	275	246	171	186	137	543													Smp_049000	1.6844	1.51884	3.54288	7.33181	3.03502	2.56131	2.62308	2.53274	2.85628	3.8479
Smp_049010	Chr_2	13930672	13941891	11.219		1877	2839	4438	4219	926	1020	531	618	419	1537													Smp_049010	5.70813	8.88831	14.2723	13.7588	18.4327	19.1547	14.6912	15.178	15.7559	19.6448
Smp_049140	Chr_2	14343143	14348945	5.802		3351	2996	2716	4923	231	161	338	353	189	319													Smp_049140	19.7052	18.1373	16.8894	31.0439	8.89133	5.84625	18.0824	16.764	13.7425	7.88388
Smp_049150	Chr_2	14359906	14404685	44.779		2023	2441	3068	1916	486	476	2011	2248	2025	846													Smp_049150	1.54136	1.9147	2.47197	1.56547	2.42379	2.23956	13.9398	13.8325	19.078	2.70909
Smp_049160	Chr_2	14408099	14412084	3.985		632	1179	1209	518	67	78	17	24	25	121													Smp_049160	5.41094	10.3919	10.9461	4.75582	3.75473	4.12378	1.32415	1.65945	2.64664	4.35396
Smp_049170	Chr_2	14426658	14429199	2.541		1832	1589	3139	3056	386	667	371	394	436	866													Smp_049170	24.5983	21.9648	44.5706	44.002	33.9246	55.3033	45.3197	42.724	72.3877	48.8698
Smp_049230	Chr_1	48970005	48971840	1.835		45	73	3	0	25	53	0	0	0	125													Smp_049230	0.836681	1.39732	0.0589858	0	3.04254	6.08512	0	0	0	9.7679
Smp_049240	Chr_1	48960029	48960733	0.704		7586	4938	3602	5092	1010	714	145	138	44	442													Smp_049240	367.641	246.369	184.601	264.63	320.392	213.676	63.9313	54.0116	26.3671	90.0278
Smp_049250	Chr_1	48997719	48999319	1.6		18491	14050	9940	10691	4064	3112	409	508	297	3262													Smp_049250	394.297	308.435	224.145	244.468	567.239	409.778	79.3453	87.4831	78.3104	292.342
Smp_049270	Chr_1	49059155	49095888	36.733		22062	24935	35308	18436	4549	5227	359	539	339	6638													Smp_049270	20.4914	23.843	34.68	18.3626	27.6562	29.9796	3.03359	4.04308	3.89338	25.9124
Smp_049280	Chr_1	49102071	49115755	13.684		24	21	18	24	2	2	0	0	0	2													Smp_049280	0.0598386	0.0539032	0.0474593	0.0641685	0.03264	0.0307926	0	0	0	0.0209577
Smp_049300	Chr_1	49146690	49148411	1.721		3412	2507	1838	1909	50	54	11	3	1	35													Smp_049300	67.6413	51.166	38.5325	40.5834	6.48816	6.61062	1.98395	0.480309	0.245133	2.91618
Smp_049330	Chr_1	49167553	49188400	20.847		1709	1849	2871	2300	377	373	501	628	380	657													Smp_049330	2.79693	3.11531	4.9688	4.03653	4.0386	3.7696	7.45954	8.30035	7.68994	4.51907
Smp_049380	Chr_1	49445667	49474453	28.786		4598	5674	6916	5041	1186	1331	337	364	233	1905													Smp_049380	5.44968	6.92335	8.66834	6.40706	9.20102	9.74151	3.63385	3.48418	3.41474	9.48944
Smp_049390	Chr_1	49476888	49513494	36.606		1657	1932	2472	2021	373	409	377	425	310	514													Smp_049390	1.54438	1.8538	2.43646	2.01994	2.27556	2.35397	3.19674	3.19902	3.57267	2.01344
Smp_049400	Chr_1	49538630	49539037	0.407		10	30	15	6	1	2	0	0	2	6													Smp_049400	0.83828	2.58902	1.32972	0.539362	0.548704	1.0353	0	0	2.07309	2.1139
Smp_049450	Chr_1	49601715	49602817	1.102		2335	1628	2668	3662	121	154	38	25	24	240													Smp_049450	72.2918	51.8897	87.3507	121.58	24.5209	29.4421	10.7034	6.25084	9.18782	31.2289
Smp_049500	Chr_1	49743192	49761999	18.807		4970	5126	5099	7688	897	920	457	483	415	1226													Smp_049500	9.01614	9.57342	9.782	14.9561	10.6514	10.3062	7.54249	7.07633	9.30918	9.34756
Smp_049510	Chr_1	49772877	49787280	14.403		6718	8227	5182	3296	360	393	337	415	335	868													Smp_049510	15.9137	20.063	12.981	8.37255	5.5819	5.74869	7.26265	7.93918	9.81239	8.64159
Smp_049520	Chr_1	49816016	49825685	9.669		3951	3965	5757	6043	844	1083	372	437	321	1287													Smp_049520	13.9415	14.4036	21.4821	22.8662	19.4937	23.5981	11.9421	12.4532	14.0058	19.0864
Smp_049550	Chr_1	49952027	49954197	2.17		53508	71288	46793	25082	5767	3673	6829	10680	5017	5713													Smp_049550	841.284	1153.89	778.007	422.889	593.503	356.608	976.822	1356.1	975.365	377.513
Smp_049580	Chr_1	50039448	50043221	3.773		1031	1091	2242	1940	632	1037	130	124	122	1358													Smp_049580	9.323	10.1565	21.4393	18.8122	37.4079	57.9057	10.6948	9.05556	13.6413	51.6107
Smp_049600	Chr_1	50105335	50114332	8.997		2033	2986	4050	4314	832	714	442	571	287	812													Smp_049600	7.70945	11.6574	16.2413	17.5431	20.6518	16.7198	15.249	17.4871	13.4576	12.9415
Smp_049610	Chr_1	50123869	50128418	4.549		100	81	130	156	36	28	15	3	6	33													Smp_049610	0.750011	0.625428	1.03107	1.25468	1.76734	1.2968	1.02351	0.181713	0.55644	1.04022
Smp_049630	Chr_1	50131808	50138389	6.581		3993	4932	5733	4104	522	550	265	294	345	1114													Smp_049630	20.701	26.3232	31.4306	22.816	17.7138	17.6076	12.4989	12.3094	22.1162	24.2728
Smp_049680	Chr_1	50182068	50183019	0.951		7852	7458	8528	7333	822	847	509	579	501	1221													Smp_049680	281.698	275.454	323.541	282.114	193.03	187.643	166.133	167.756	222.249	184.104
Smp_049730	Chr_1	50482296	50501471	19.175		6583	8531	9058	6613	647	701	334	450	396	1367													Smp_049730	11.7131	15.6269	17.0435	12.6179	7.53532	7.70215	5.40666	6.46632	8.7125	10.2226
Smp_049740	Chr_1	50511950	50526068	14.118		174	356	409	167	375	351	51	68	30	479													Smp_049740	0.420494	0.885696	1.04523	0.43278	5.93186	5.23798	1.12128	1.32714	0.89646	4.86507
Smp_049760	Chr_4.unplaced.SC_0032	1981434	2002395	20.961		1478	1872	2956	2380	262	325	88	140	77	450													Smp_049760	2.40573	3.13691	5.08809	4.15421	2.7914	3.26664	1.30313	1.84033	1.54975	3.07842
Smp_049850	Chr_4.unplaced.SC_0032	1712110	1713034	0.924		378	263	220	309	377	173	68	60	31	311													Smp_049850	13.9574	9.99751	8.59039	12.2352	91.1175	39.4461	22.8431	17.892	14.1538	48.2631
Smp_049880	Chr_4.unplaced.SC_0032	1627253	1634863	7.61		3399	4133	3474	2327	257	340	236	269	374	629													Smp_049880	15.2388	19.0761	16.4705	11.1876	7.54191	9.41291	9.62599	9.73975	20.7334	11.852
Smp_049890	Chr_4.unplaced.SC_0032	1613773	1623747	9.974		1518	1327	1474	1931	122	98	88	127	54	112													Smp_049890	5.19261	4.67315	5.332	7.08332	2.73164	2.07008	2.73862	3.50844	2.28406	1.61018
Smp_049910	Chr_4.unplaced.SC_0032	1528118	1541995	13.877		2642	3834	4072	2769	552	565	245	351	242	761													Smp_049910	6.49562	9.70431	10.587	7.30047	8.88334	8.57793	5.4801	6.96934	7.35703	7.8635
Smp_049920	Chr_4.unplaced.SC_0032	1436856	1488969	52.113		669	989	1562	1205	188	195	112	144	134	303													Smp_049920	0.437989	0.666589	1.08143	0.845989	0.805646	0.788348	0.667099	0.761372	1.08478	0.833727
Smp_049930	Chr_4.unplaced.SC_0032	1428507	1435226	6.719		2286	2152	3320	2245	165	210	87	129	117	225													Smp_049930	11.6079	11.2498	17.8277	12.2246	5.48418	6.58482	4.01914	5.29012	7.34622	4.80181
Smp_049970	Chr_4.unplaced.SC_0032	1262707	1271595	8.888		2939	3079	3631	4112	889	994	446	553	388	1139													Smp_049970	11.2818	12.1678	14.7396	16.9267	22.3373	23.562	15.5757	17.1436	18.4166	18.3758
Smp_049990	Chr_4.unplaced.SC_0032	1225294	1240620	15.326		742	755	1542	2128	293	372	144	180	195	556													Smp_049990	1.6518	1.73032	3.63009	5.08003	4.26944	5.1138	2.91643	3.23611	5.36771	5.20203
Smp_050080	Chr_4.unplaced.SC_0032	1072564	1074153	1.589		1988	2610	2368	2541	33	56	84	124	97	114													Smp_050080	42.6851	57.6932	53.7675	58.5065	4.63791	7.42495	16.4087	21.502	25.7532	10.2875
Smp_050110	Chr_4.unplaced.SC_0032	1051962	1060610	8.648		1770	1777	3179	2977	455	491	274	325	247	708													Smp_050110	6.98299	7.21738	13.2629	12.5947	11.7497	11.9618	9.83452	10.3549	12.0494	11.7394
Smp_050130	Chr_4.unplaced.SC_0032	1032719	1034003	1.284		9340	8599	6107	5002	1080	961	301	441	231	1271													Smp_050130	248.179	235.229	171.603	142.529	187.841	157.684	72.7645	94.6354	75.8979	141.941
Smp_050160	Chr_4.unplaced.SC_0032	979318	991617	12.299		281	356	1120	968	224	192	80	131	103	267													Smp_050160	0.779507	1.01669	3.28557	2.87958	4.06734	3.28898	2.01901	2.93482	3.53305	3.11292
Smp_050220	Chr_4.unplaced.SC_0032	783393	797117	13.724		1015	1283	1586	449	563	842	71	104	127	1637													Smp_050220	2.5233	3.28363	4.16951	1.19699	9.16137	12.9259	1.60582	2.08801	3.90397	17.1039
Smp_050250	Chr_4.unplaced.SC_0032	679210	680460	1.25		3393	2248	3255	3789	101	171	199	164	229	363													Smp_050250	92.6099	63.1676	93.9514	110.902	18.0445	28.8214	49.4153	36.1505	77.2873	41.6412
Smp_050270	Chr_4.unplaced.SC_0032	599357	608836	9.479		0	0	0	0	6	5	2478	3396	2015	4													Smp_050270	0	0	0	0	0.141358	0.111131	81.1441	98.7155	89.68	0.0605096
Smp_050280	Chr_4.unplaced.SC_0032	590359	590814	0.455		28605	17040	18962	26261	2232	1543	4439	4962	1826	1490													Smp_050280	2144.94	1315.43	1503.61	2111.66	1095.51	714.47	3028.25	3004.87	1693.06	469.572
Smp_050310	Chr_4.unplaced.SC_0032	545154	545625	0.471		17	33	27	14	0	4	2	6	3	1													Smp_050310	1.23144	2.46094	2.06826	1.0875	0	1.78924	1.31804	3.51003	2.6871	0.304443
Smp_050350	Chr_4.unplaced.SC_0032	370779	372118	1.339		2193	2093	3426	3807	280	327	218	280	178	483													Smp_050350	55.8781	54.9031	92.3143	104.022	46.6993	51.4513	50.5352	57.6179	56.0819	51.7242
Smp_050360	Chr_4.unplaced.SC_0032	364961	367912	2.951		3523	2396	4426	4406	337	352	394	379	301	576													Smp_050360	40.7312	28.5184	54.1133	54.6259	25.5031	25.1306	41.4424	35.3875	43.0309	27.9885
Smp_050380	Chr_4.unplaced.SC_0032	280162	342714	62.552		294	404	943	573	41	64	57	64	46	42													Smp_050380	0.160358	0.226855	0.543917	0.335148	0.146378	0.21556	0.282847	0.281916	0.310241	0.0962798
Smp_050390	Chr_4.unplaced.SC_0032	233304	253266	19.962		13496	15720	14868	9684	19969	19166	1323	1658	1510	26904													Smp_050390	23.0667	27.6603	26.8727	17.749	223.401	202.282	20.5719	22.8855	31.9121	193.259
Smp_050430	Chr_4	25556969	25563458	6.489		1520	1644	1598	1529	327	367	489	604	236	345													Smp_050430	7.99189	8.89881	8.88508	8.62092	11.2539	11.9157	23.391	25.6472	15.3432	7.62375
Smp_050470	Chr_4	25307789	25337797	30.008		1281	1438	1918	1841	177	203	162	281	188	269													Smp_050470	1.45645	1.68318	2.30608	2.24461	1.31725	1.42524	1.6757	2.58018	2.64304	1.28541
Smp_050520	Chr_4	25043934	25058449	14.515		84	209	212	94	521	751	62	104	62	872													Smp_050520	0.197445	0.505752	0.526964	0.236938	8.01592	10.9007	1.32585	1.97422	1.80201	8.61443
Smp_050540	Chr_4	24963701	24979624	15.923		1224	1091	1399	1241	103	53	49	78	44	110													Smp_050540	2.62265	2.40662	3.16997	2.85148	1.44459	0.701262	0.955189	1.34974	1.16576	0.990592
Smp_050570	Chr_4	6685284	6693798	8.514		3215	3978	4417	2523	489	472	291	355	372	946													Smp_050570	12.8834	16.4112	18.7178	10.8419	12.8265	11.6799	10.6091	11.4888	18.4328	15.9325
Smp_050590	Chr_4	28604873	28605589	0.716		2423	1917	3418	4250	168	154	194	185	158	328													Smp_050590	115.458	94.041	172.235	217.17	52.3997	45.3145	84.1021	71.1933	93.0951	65.6883
Smp_050630	Chr_4	5516086	5535088	19.002		1792	2342	2708	2745	567	757	406	413	314	1021													Smp_050630	3.21753	4.32908	5.14176	5.28526	6.66371	8.39317	6.63201	5.98868	6.97129	7.70466
Smp_050640	Chr_4	5541786	5561348	19.562		860	1439	1213	808	537	624	301	408	188	600													Smp_050640	1.49992	2.58378	2.23723	1.5112	6.13047	6.72049	4.77608	5.74681	4.05441	4.3981
Smp_050700	Chr_4	5917834	5932864	15.03		4334	5523	4070	2823	469	448	350	438	255	485													Smp_050700	9.83815	12.907	9.77007	6.87188	6.96861	6.27984	7.22815	8.02963	7.15755	4.62711
Smp_050730	Chr_4	5991012	6004143	13.131		1681	1967	2307	2253	291	277	257	306	201	389													Smp_050730	4.36771	5.26156	6.33887	6.27751	4.94912	4.44438	6.0751	6.42102	6.45775	4.24795
Smp_050740	Chr_4	6009967	6020339	10.372		2669	2745	4191	3697	504	424	214	259	131	503													Smp_050740	8.7795	9.29582	14.5787	13.041	10.8518	8.61257	6.40427	6.88046	5.32834	6.95397
Smp_050750	Chr_4	6039210	6039777	0.567		44	25	27	23	14	1	2800	3439	1441	16													Smp_050750	2.64761	1.54869	1.71808	1.48412	5.51414	0.371575	1532.83	1671.2	1072.17	4.04636
Smp_050760	Chr_4	6042163	6045234	3.071		1314	1120	1999	2558	104	145	114	186	112	123													Smp_050760	14.5982	12.8099	23.4852	30.4751	7.56286	9.94759	11.5224	16.6883	15.3858	5.74318
Smp_050820	Chr_4	6256538	6265359	8.821		2452	2402	2307	1584	55	39	113	111	138	74													Smp_050820	9.48388	9.56452	9.43609	6.56993	1.39244	0.931486	3.9763	3.46725	6.6	1.20293
Smp_050830	Chr_4	6271947	6281837	9.89		1005	1336	1639	1198	310	431	269	327	255	602													Smp_050830	3.467	4.7448	5.97922	4.43184	7	9.18143	8.44256	9.11028	10.8774	8.72825
Smp_050880	Chr_6	13939050	13941910	2.86		626	601	806	818	148	120	100	94	47	91													Smp_050880	7.46779	7.38102	10.1679	10.4643	11.5566	8.83985	10.8531	9.05612	6.9329	4.5625
Smp_050890	Chr_6	13943940	13975131	31.191		860	1387	1989	1711	337	354	226	305	215	465													Smp_050890	0.940703	1.56191	2.30074	2.00699	2.41287	2.39113	2.24904	2.69433	2.90798	2.13772
Smp_050920	Chr_6	14019743	14027786	8.043		5279	5379	4371	3240	557	728	274	323	300	848													Smp_050920	22.3933	23.4905	19.6076	14.7384	15.4657	19.0697	10.5743	11.0653	15.7357	15.1184
Smp_050940	Chr_6	14087884	14088794	0.91		30541	17746	24550	28893	1915	1404	2870	3415	1847	1943													Smp_050940	1145.05	684.963	973.357	1161.65	469.959	325.054	978.946	1034.02	856.265	306.167
Smp_051000	Chr_6	14218846	14286149	67.303		242	325	815	1040	91	107	146	114	178	220													Smp_051000	0.122677	0.169612	0.436903	0.565357	0.301953	0.334949	0.673343	0.466714	1.11575	0.468722
Smp_051010	Chr_6	14285834	14290447	4.613		1567	1833	2231	2296	368	323	167	316	98	331													Smp_051010	11.5896	13.9568	17.4493	18.2101	17.8155	14.7519	11.237	18.8749	8.96243	10.289
Smp_051050	Chr_6	14356461	14356763	0.302		0	0	0	0	0	0	0	0	0	0													Smp_051050	0	0	0	0	0	0	0	0	0	0
Smp_051060	Chr_6	14379481	14380902	1.421		165	102	149	219	10	11	11	5	17	38													Smp_051060	3.96163	2.52124	3.78316	5.63863	1.57159	1.6309	2.4028	0.969519	5.04705	3.83457
Smp_051070	Chr_6	14401061	14419209	18.148		178	164	285	295	11	15	6	12	7	28													Smp_051070	0.334638	0.317412	0.566602	0.594726	0.135362	0.174137	0.102622	0.182193	0.162724	0.221236
Smp_051080	Chr_6	14423352	14434471	11.119		3513	3520	6113	6101	875	764	438	587	454	1271													Smp_051080	10.7794	11.1195	19.8359	20.0752	17.5742	14.4763	12.2272	14.5463	17.2255	16.3911
Smp_051090	Chr_6	14445111	14453695	8.584		41	39	127	141	10	11	1	2	2	16													Smp_051090	0.162959	0.159582	0.533797	0.60097	0.260161	0.269981	0.03616	0.0641979	0.0982931	0.267274
Smp_051110	Chr_6	14494728	14504397	9.669		1925	1205	2229	3028	273	344	240	171	141	462													Smp_051110	6.79255	4.37737	8.31746	11.4577	6.30542	7.4956	7.70456	4.87298	6.15206	6.85153
Smp_051120	Chr_6	14508171	14534341	26.17		337	261	397	256	10	15	9	8	5	18													Smp_051120	0.439349	0.350304	0.54733	0.357899	0.0853353	0.120758	0.106747	0.0842299	0.0806026	0.098627
Smp_051130	Chr_6	14536872	14548795	11.923		25	61	144	116	16	7	3	0	0	36													Smp_051130	0.0715382	0.179702	0.435752	0.355956	0.299686	0.123692	0.0781005	0	0	0.432956
Smp_051210	SC_0062	535506	543936	8.43		19064	24573	22019	17325	2822	2844	1507	1770	1219	4394													Smp_051210	77.1561	102.386	94.2393	75.1916	74.7587	71.0774	55.4886	57.853	61.0041	74.7411
Smp_051220	SC_0062	499000	500923	1.923		280	151	193	171	27	42	6	22	1	43													Smp_051220	4.96778	2.75807	3.6211	3.25342	3.13557	4.6015	0.968479	3.15227	0.219383	3.20639
Smp_051230	SC_0062	471255	484812	13.557		13455	14350	12700	9802	1639	1718	1371	1619	735	1329													Smp_051230	33.8613	37.1789	33.7989	26.453	26.999	26.6986	31.39	32.9051	22.8721	14.0569
Smp_051260	SC_0062	429617	431813	2.196		68621	58374	48869	46483	5388	3812	7140	9242	2809	3250													Smp_051260	1066.13	933.674	802.903	774.436	547.933	365.721	1009.22	1159.62	539.638	212.216
Smp_051280	SC_0062	375696	406090	30.394		811	1121	1982	2466	387	450	251	263	376	853													Smp_051280	0.910367	1.29547	2.35276	2.96844	2.84352	3.11928	2.56333	2.38423	5.21895	4.02428
Smp_051290	SC_0062	298258	308392	10.134		3	13	28	9	29	29	1	12	6	60													Smp_051290	0.0101001	0.0450578	0.0996872	0.0324927	0.639072	0.602902	0.0306293	0.326273	0.249777	0.84898
Smp_051300	SC_0062	282611	291565	8.954		4958	5280	6340	4804	561	724	344	493	309	857													Smp_051300	18.8918	20.7121	25.5467	19.6295	13.992	17.0353	11.925	15.1709	14.5588	13.7243
Smp_051320	SC_0062	129828	141840	12.012		1578	1947	1473	1151	90	88	78	80	47	170													Smp_051320	4.48204	5.69323	4.42435	3.50577	1.67325	1.54347	2.01557	1.83508	1.65069	2.02937
Smp_051360	SC_0049	1523964	1536567	12.603		5246	5559	5178	4862	789	979	810	843	560	1498													Smp_051360	14.2016	15.4928	14.8235	14.1145	13.9809	16.3658	19.9494	18.4304	18.7455	17.0437
Smp_051390	SC_0049	1594021	1601417	7.396		2080	2030	2476	3090	268	254	138	216	148	329													Smp_051390	9.59511	9.64067	12.0786	15.2857	8.09227	7.23546	5.79162	8.04706	8.44205	6.37861
Smp_051400	SC_0049	1646018	1658336	12.318		1699	952	1080	1996	80	164	38	42	51	234													Smp_051400	4.70584	2.71459	3.16334	5.92849	1.45038	2.805	0.95755	0.939484	1.74668	2.72397
Smp_051410	SC_0049	1669474	1682102	12.628		586	604	731	726	38	56	16	15	7	115													Smp_051410	1.58324	1.68	2.08855	2.10342	0.672019	0.934293	0.393282	0.327293	0.233855	1.30584
Smp_051420	SC_0049	1685317	1694125	8.808		738	741	1223	1364	37	56	38	44	40	55													Smp_051420	2.85866	2.95494	5.0097	5.66579	0.938117	1.33949	1.33914	1.37643	1.91587	0.89539
Smp_051500	SC_0239	246508	247749	1.241		232	174	404	550	85	122	59	81	45	61													Smp_051500	6.37822	4.92476	11.7455	16.2149	15.2961	20.7118	14.757	17.9843	15.2976	7.04831
Smp_051510	SC_0239	193769	237211	43.442		657	1048	2822	2944	456	593	169	174	140	783													Smp_051510	0.515987	0.847343	2.34374	2.47943	2.34416	2.8759	1.20752	1.10362	1.35957	2.58451
Smp_051530	SC_0239	142342	152068	9.726		5663	7994	8413	5164	837	954	604	662	520	1205													Smp_051530	19.8653	28.8694	31.2089	19.4257	19.2187	20.6654	19.2762	18.7544	22.5555	17.7656
Smp_051550	SC_0239	84988	96455	11.467		911	652	1259	2080	222	289	154	143	142	521													Smp_051550	2.71052	1.99713	3.9613	6.63647	4.3235	5.30979	4.16859	3.43611	5.22422	6.51501
Smp_051580	SC_0239	20319	22327	2.008		35	62	90	146	12	14	7	9	15	34													Smp_051580	0.594686	1.08452	1.61712	2.66019	1.3346	1.46891	1.08206	1.23498	3.15145	2.42796
Smp_051640	SC_0049	1759751	1787625	27.874		125	133	288	481	43	55	25	12	11	94													Smp_051640	0.153001	0.167595	0.372782	0.631349	0.34451	0.415712	0.278393	0.118621	0.166485	0.483566
Smp_051660	SC_0049	1700740	1707128	6.388		698	615	1946	2331	627	809	183	208	115	942													Smp_051660	3.72798	3.38157	10.9911	13.3506	21.9197	26.6817	8.8921	8.97178	7.59479	21.1453
Smp_051670	SC_0049	1702656	1703116	0.46		0	2	2	4	4	5	0	1	0	0													Smp_051670	0	0.152714	0.156868	0.318146	1.94194	2.29003	0	0.598994	0	0
Smp_051760	Chr_4	3975541	3989403	13.862		84	214	392	130	97	86	54	60	33	184													Smp_051760	0.206746	0.542245	1.02029	0.343116	1.56271	1.30708	1.20917	1.19263	1.00432	1.90335
Smp_051810	Chr_4	3780461	3788191	7.73		1462	1682	1888	969	371	400	50	71	56	486													Smp_051810	6.45285	7.64283	8.81221	4.58636	10.7183	10.9021	2.00775	2.53081	3.05627	9.01538
Smp_051920	Chr_4	3420411	3421965	1.554		1951	1886	1778	2280	106	141	96	78	63	120													Smp_051920	42.8341	42.6284	41.2803	53.6794	15.2331	19.116	19.1751	13.8301	17.103	11.0728
Smp_051930	Chr_4	3371392	3386671	15.279		1334	1656	2505	2463	390	515	322	282	269	637													Smp_051930	2.97882	3.80692	5.91528	5.89784	5.70036	7.10136	6.54153	5.08551	7.42746	5.97822
Smp_051990	Chr_4	3220733	3260577	39.844		2893	3738	4380	3315	739	808	108	181	108	1964													Smp_051990	2.47725	3.29522	3.96619	3.044	4.14204	4.27246	0.841354	1.25169	1.14352	7.06815
Smp_052060	Chr_4	2781058	2796731	15.673		8217	8254	6599	4561	772	749	392	425	248	1124													Smp_052060	17.8873	18.4978	15.1911	10.6471	11.0001	10.0684	7.7634	7.47166	6.67548	10.2835
Smp_052140	Chr_4	2642869	2656897	14.028		708	723	1155	1864	133	146	125	88	99	280													Smp_052140	1.72195	1.8103	2.97063	4.86154	2.11733	2.19274	2.76587	1.72849	2.9773	2.86213
Smp_052150	Chr_4	2637046	2638290	1.244		373	390	358	245	23	32	16	13	10	30													Smp_052150	10.2299	11.0116	10.383	7.20559	4.12895	5.4195	3.99225	2.87941	3.39127	3.45802
Smp_052160	Chr_4	2619194	2634222	15.028		138	224	568	627	33	54	27	45	39	94													Smp_052160	0.313301	0.523546	1.36367	1.52648	0.490394	0.757046	0.557674	0.825071	1.09483	0.89692
Smp_052230	Chr_4	2239784	2258291	18.507		3209	3787	4677	1570	360	299	60	53	51	506													Smp_052230	5.91585	7.18732	9.11787	3.10375	4.34409	3.40381	1.00631	0.789078	1.16256	3.9205
Smp_052250	Chr_4	2210318	2219796	9.478		368	419	708	685	232	244	35	54	66	586													Smp_052250	1.32469	1.55276	2.69512	2.64422	5.46643	5.42379	1.14622	1.56985	2.93772	8.8656
Smp_052280	Chr_4	2073613	2082908	9.295		2615	2607	5156	4665	709	695	545	561	444	880													Smp_052280	9.59856	9.85144	20.0136	18.3623	17.0345	15.7531	18.1997	16.6301	20.1519	13.5756
Smp_052290	Chr_4	2044260	2063874	19.614		354	344	483	308	8	17	1	1	0	20													Smp_052290	0.615773	0.616028	0.888471	0.574524	0.091087	0.182605	0.0158253	0.014048	0	0.146215
Smp_052330	Chr_3	14186406	14191366	4.96		1429	1297	1852	2408	417	398	333	413	218	458													Smp_052330	9.82956	9.18473	13.4717	17.7623	18.7753	16.9056	20.8392	22.9429	18.5421	13.2407
Smp_052350	Chr_3	14151539	14165297	13.758		954	1216	2235	1718	597	847	370	404	309	1162													Smp_052350	2.36579	3.10446	5.86117	4.56869	9.69062	12.9705	8.34766	8.09108	9.47515	12.1109
Smp_052390	Chr_3	14019494	14022509	3.015		828	1117	1109	924	10	33	79	123	59	5													Smp_052390	9.36972	13.0129	13.2711	11.2127	0.740705	2.30598	8.13313	11.2408	8.25558	0.237799
Smp_052420	SC_0377	2525	13267	10.742		1022	1407	2040	1635	146	214	126	117	71	272													Smp_052420	3.24601	4.60063	6.85184	5.56873	3.03529	4.19719	3.64086	3.0011	2.78841	3.63087
Smp_052430	Chr_6	10370923	10370940	0.017		0	0	0	0	0	0	0	0	0	0													Smp_052430	0	0	0	0	0	0	0	0	0	0
Smp_052460	Chr_4	30697908	30698320	0.412		55	106	111	55	15	11	5	4	2	21													Smp_052460	4.55459	9.03684	9.72049	4.88415	8.13068	5.62503	3.76696	2.67512	2.04793	7.30885
Smp_052470	Chr_4	30700714	30703388	2.674		223	201	239	168	14	21	10	4	9	17													Smp_052470	2.84529	2.64024	3.22477	2.29864	1.16923	1.65458	1.1608	0.412172	1.41992	0.911622
Smp_052500	Chr_4	30623620	30627346	3.726		1354	936	1398	1984	214	268	164	165	109	465													Smp_052500	12.3982	8.8235	13.5371	19.4815	12.8264	15.1538	13.6622	12.2017	12.3415	17.8952
Smp_052510	Chr_4	30611323	30618418	7.095		0	7	8	1	0	1	1	0	0	0													Smp_052510	0	0.034654	0.0406818	0.00515669	0	0.0296946	0.0437488	0	0	0
Smp_052560	SC_0134	461680	461961	0.281		455	574	793	447	255	298	144	156	114	442													Smp_052560	55.2445	71.7486	101.819	58.2003	202.659	223.429	159.065	152.967	171.152	225.55
Smp_052630	SC_0134	709328	726973	17.645		80	81	186	119	16	17	2	0	2	37													Smp_052630	0.154686	0.161239	0.380324	0.246745	0.202503	0.202982	0.0351825	0	0.047818	0.300682
Smp_052640	Chr_1	27374237	27385770	11.533		1216	1518	1678	908	298	306	131	171	105	424													Smp_052640	3.59729	4.62314	5.24943	2.8805	5.77041	5.58996	3.52571	4.0854	3.84087	5.2717
Smp_052660	Chr_1	27453022	27454671	1.649		27	26	41	6	5	36	1	2	4	13													Smp_052660	0.558633	0.55381	0.897068	0.133123	0.677145	4.59951	0.188234	0.334187	1.02335	1.13045
Smp_052710	Chr_1	27588869	27590216	1.347		1750	1599	2102	2331	219	222	145	171	78	277													Smp_052710	44.3255	41.6955	56.3025	63.3138	36.3086	34.7228	33.4132	34.9791	24.4292	29.4876
Smp_052730	Chr_6	8545537	8582523	36.986		37	64	152	110	31	49	11	18	39	84													Smp_052730	0.0341309	0.0607786	0.148275	0.108813	0.187179	0.279118	0.0923153	0.134096	0.444847	0.325663
Smp_052740	Chr_6	8531089	8535952	4.863		1545	1695	2060	1932	95	135	151	153	127	175													Smp_052740	10.8395	12.2426	15.2836	14.5354	4.36267	5.8487	9.63809	8.66897	11.0175	5.16013
Smp_052750	Chr_6	8519071	8527871	8.8		691	538	1031	1113	86	90	55	93	73	137													Smp_052750	2.67904	2.14737	4.22706	4.62739	2.18247	2.15471	1.93998	2.91193	3.49964	2.23236
Smp_052760	Chr_6	8514146	8517334	3.188		1222	1017	832	898	16	24	12	20	11	72													Smp_052760	13.0779	11.205	9.41602	10.3058	1.12082	1.58607	1.16837	1.72859	1.45565	3.23848
Smp_052780	Chr_1	27854806	27856377	1.571		195	202	354	687	62	73	47	67	30	105													Smp_052780	4.23489	4.5163	8.12998	15.9994	8.81349	9.78985	9.28624	11.7511	8.05616	9.58385
Smp_052790	Chr_1	27810854	27836549	25.695		1019	1699	1376	1322	380	256	184	278	242	779													Smp_052790	1.35304	2.32248	1.93211	1.88238	3.30269	2.09904	2.22273	2.9811	3.97328	4.34726
Smp_052800	Chr_1	27775053	27786530	11.477		1193	1435	1718	1808	263	353	157	203	203	520													Smp_052800	3.54646	4.39169	5.40079	5.7636	5.11752	6.48001	4.24609	4.87358	7.46192	6.49684
Smp_052810	Chr_1	27746375	27769102	22.727		2760	2924	4168	3448	839	750	295	335	277	1297													Smp_052810	4.14334	4.51901	6.6168	5.55071	8.24427	6.95262	4.02901	4.06147	5.14186	8.18323
Smp_052850	Chr_1	27620409	27620667	0.258		1264	882	1100	1938	89	120	98	116	6	55													Smp_052850	167.152	120.076	153.828	274.826	77.0376	97.9921	117.903	123.885	9.81103	30.5682
Smp_052870	Chr_3	983519	992083	8.564		7380	6921	6976	5587	758	789	495	662	374	746													Smp_052870	29.4011	28.3857	29.3895	23.8685	19.7663	19.4102	17.941	21.2991	18.4237	12.4908
Smp_052880	Chr_3	1002964	1024632	21.668		275	316	1246	820	389	493	51	67	66	538													Smp_052880	0.43301	0.512243	2.07473	1.38458	4.00925	4.79355	0.730583	0.851993	1.28501	3.56033
Smp_052890	Chr_3	1091353	1109974	18.621		1126	1042	1568	1036	178	155	211	259	195	287													Smp_052890	2.06309	1.9655	3.03812	2.03554	2.13476	1.75371	3.5172	3.83245	4.41789	2.21007
Smp_052910	Chr_3	1152766	1158553	5.787		9275	8963	8079	6483	1206	1348	480	533	517	2536													Smp_052910	54.682	54.4011	50.3693	40.987	46.54	49.0756	25.7458	25.3778	37.6895	62.8381
Smp_052990	Chr_5	1617858	1631052	13.194		35	13	40	11	27	31	2	6	15	54													Smp_052990	0.0905055	0.0346079	0.109382	0.0305028	0.457004	0.495011	0.0470513	0.125301	0.47962	0.586873
Smp_053020	Chr_5	1813678	1825643	11.965		942	780	1027	1339	110	105	59	70	90	244													Smp_053020	2.6861	2.28976	3.09685	4.09441	2.05311	1.84887	1.53058	1.612	3.17331	2.92418
Smp_053030	Chr_5	1830277	1836425	6.148		5629	5040	5275	5921	420	448	444	455	287	510													Smp_053030	31.2378	28.7942	30.9564	35.2359	15.2563	15.3523	22.4165	20.3919	19.6939	11.895
Smp_053040	Chr_5	1842607	1849369	6.762		2391	1962	2257	2420	650	620	345	438	198	541													Smp_053040	12.0639	10.1914	12.0426	13.0937	21.467	19.3173	15.8366	17.8476	12.353	11.4723
Smp_053060	Chr_5	1914520	1942417	27.897		4269	4948	6442	6628	785	812	338	365	277	1458													Smp_053060	5.22098	6.22989	8.33154	8.69258	6.28412	6.13237	3.76077	3.60509	4.18895	7.49423
Smp_053100	Chr_5	2025693	2055534	29.841		1047	1654	1965	1109	906	862	109	165	237	1408													Smp_053100	1.19706	1.94684	2.37581	1.3597	6.78028	6.08588	1.13379	1.52353	3.35056	6.76576
[truncated: 11,316 more rows]
