# Supplementary material for: Evolution of gene dosage on the Z-chromosome of schistosome parasites
Source: eLife. 2018 Jul 25;7:e35684. doi: 10.7554/eLife.35684 (PMC6089595; doi:10.7554/eLife.35684)
Supplement: Figure 3—source data 1. [file elife-35684-fig3-data1.xlsx]

## Sheet: Figure 3-source data 1
Figure 3-source data 1: One-to-one orthology S. mansoni vs S. japonicum
Blat one-to-one orthologs			WormBase orthologs
S. mansoni	S. japonicum		S. mansoni	S. japonicum
Smp_000020.1	Sjp_0076490		Smp_000030	Sjp_0076480
Smp_000030.1	Sjp_0076480		Smp_000050	Sjp_0078990
Smp_000040.1	Sjp_0061770		Smp_000070	Sjp_0078980
Smp_000050.1	Sjp_0078990		Smp_000080	Sjp_0029980
Smp_000070.1	Sjp_0078980		Smp_000130	Sjp_0004410
Smp_000080.1	Sjp_0029980		Smp_000190	Sjp_0004470
Smp_000100.1	Sjp_0004380		Smp_000230	Sjp_0004500
Smp_000110.1	Sjp_0004390		Smp_000240	Sjp_0004510
Smp_000130.1	Sjp_0004410		Smp_000260	Sjp_0094720
Smp_000140.1	Sjp_0066700		Smp_000300	Sjp_0024850
Smp_000150.1	Sjp_0004420		Smp_000300	Sjp_0024880
Smp_000160.1	Sjp_0004440		Smp_000310	Sjp_0024840
Smp_000170.1	Sjp_0004460		Smp_000320	Sjp_0024830
Smp_000190.1	Sjp_0004470		Smp_000340	Sjp_0024820
Smp_000200.1	Sjp_0004480		Smp_000410	Sjp_0102600
Smp_000230.1	Sjp_0004500		Smp_000420	Sjp_0103590
Smp_000240.2	Sjp_0004510		Smp_000440	Sjp_0084130
Smp_000260.1	Sjp_0094720		Smp_000460	Sjp_0084120
Smp_000270.1	Sjp_0070860		Smp_000580	Sjp_0013800
Smp_000280.1	Sjp_0077740		Smp_000590	Sjp_0013790
Smp_000290.1	Sjp_0115320		Smp_000640	Sjp_0013750
Smp_000300.1	Sjp_0024850		Smp_000650	Sjp_0107880
Smp_000310.1	Sjp_0024840		Smp_000660	Sjp_0102920
Smp_000320.1	Sjp_0024830		Smp_000700	Sjp_0013680
Smp_000340.1	Sjp_0024820		Smp_000740	Sjp_0102750
Smp_000350.2	Sjp_0084140		Smp_000740	Sjp_0102740
Smp_000410.1	Sjp_0102600		Smp_000740	Sjp_0068900
Smp_000420.1	Sjp_0103590		Smp_000755	Sjp_0031210
Smp_000430.1	Sjp_0084130		Smp_000780	Sjp_0031220
Smp_000460.1	Sjp_0084120		Smp_000820	Sjp_0031250
Smp_000510.1	Sjp_0091930		Smp_000870	Sjp_0031310
Smp_000520.1	Sjp_0091940		Smp_000880	Sjp_0031320
Smp_000530.1	Sjp_0091950		Smp_000950	Sjp_0074450
Smp_000580.1	Sjp_0013800		Smp_000990	Sjp_0132580
Smp_000590.1	Sjp_0013790		Smp_001020	Sjp_0031390
Smp_000600.1	Sjp_0013780		Smp_001050	Sjp_0031420
Smp_000620.1	Sjp_0013770		Smp_001080	Sjp_0097140
Smp_000630.1	Sjp_0013760		Smp_001090	Sjp_0053140
Smp_000640.1	Sjp_0013750		Smp_001095	Sjp_0112000
Smp_000650.1	Sjp_0013730		Smp_001100	Sjp_0053130
Smp_000660.1	Sjp_0102920		Smp_001120	Sjp_0032000
Smp_000670.1	Sjp_0013720		Smp_001160	Sjp_0099020
Smp_000680.1	Sjp_0013700		Smp_001170	Sjp_0031930
Smp_000690.1	Sjp_0013690		Smp_001210	Sjp_0046800
Smp_000700.1	Sjp_0013680		Smp_001390	Sjp_0056450
Smp_000710.1	Sjp_0106640		Smp_001410	Sjp_0042410
Smp_000720.1	Sjp_0106630		Smp_001430	Sjp_0114790
Smp_000730.1	Sjp_0013640		Smp_001500	Sjp_0071720
Smp_000740.2	Sjp_0102750		Smp_001530	Sjp_0071710
Smp_000755.1	Sjp_0031210		Smp_001560	Sjp_0113870
Smp_000780.1	Sjp_0031220		Smp_001610	Sjp_0065950
Smp_000810.1	Sjp_0031230		Smp_001780	Sjp_0005930
Smp_000820.1	Sjp_0031260		Smp_001830	Sjp_0044550
Smp_000830.1	Sjp_0031290		Smp_001940	Sjp_0035740
Smp_000850.1	Sjp_0031300		Smp_001960	Sjp_0039180
Smp_000870.1	Sjp_0031310		Smp_002010	Sjp_0066750
Smp_000880.1	Sjp_0031320		Smp_002080	Sjp_0083130
Smp_000900.1	Sjp_0031340		Smp_002100	Sjp_0092870
Smp_000950.1	Sjp_0074450		Smp_002150	Sjp_0100980
Smp_000980.1	Sjp_0031360		Smp_002160	Sjp_0100970
Smp_000990.1	Sjp_0132580		Smp_002180	Sjp_0102880
Smp_001000.1	Sjp_0096880		Smp_002190	Sjp_0102870
Smp_001020.1	Sjp_0031390		Smp_002230	Sjp_0022210
Smp_001030.1	Sjp_0031410		Smp_002380	Sjp_0025010
Smp_001040.1	Sjp_0031430		Smp_002510	Sjp_0039210
Smp_001050.1	Sjp_0031420		Smp_002640	Sjp_0032500
Smp_001080.1	Sjp_0097140		Smp_002640	Sjp_0032510
Smp_001090.1	Sjp_0053140		Smp_002740	Sjp_0030510
Smp_001095.1	Sjp_0112000		Smp_002820	Sjp_0049090
Smp_001100.1	Sjp_0053130		Smp_002840	Sjp_0049100
Smp_001120.1	Sjp_0032000		Smp_002870	Sjp_0089930
Smp_001150.1	Sjp_0099050		Smp_002960	Sjp_0042380
Smp_001160.1	Sjp_0099030		Smp_003130	Sjp_0057980
Smp_001180.1	Sjp_0031970		Smp_003140	Sjp_0057970
Smp_001210.1	Sjp_0046800		Smp_003190	Sjp_0099370
Smp_001330.1	Sjp_0097320		Smp_003250	Sjp_0023500
Smp_001360.1	Sjp_0056420		Smp_003270	Sjp_0042570
Smp_001390.1	Sjp_0056450		Smp_003330	Sjp_0081490
Smp_001410.1	Sjp_0042410		Smp_003340	Sjp_0081480
Smp_001420.1	Sjp_0061840		Smp_003410	Sjp_0044770
Smp_001430.1	Sjp_0114790		Smp_003630	Sjp_0000280
Smp_001500.1	Sjp_0071720		Smp_003670	Sjp_0000220
Smp_001530.1	Sjp_0071710		Smp_003700	Sjp_0000200
Smp_001560.1	Sjp_0113870		Smp_003710	Sjp_0106720
Smp_001610.1	Sjp_0065950		Smp_003760	Sjp_0000140
Smp_001640.1	Sjp_0006020		Smp_003770	Sjp_0000130
Smp_001780.1	Sjp_0005930		Smp_003860	Sjp_0000040
Smp_001830.1	Sjp_0044550		Smp_003900	Sjp_0040470
Smp_001900.1	Sjp_0046240		Smp_003930	Sjp_0040540
Smp_001940.1	Sjp_0035740		Smp_003940	Sjp_0040530
Smp_001960.1	Sjp_0039180		Smp_003990	Sjp_0028650
Smp_001980.1	Sjp_0075360		Smp_004000	Sjp_0028630
Smp_002010.1	Sjp_0066750		Smp_004070	Sjp_0056790
Smp_002070.1	Sjp_0112690		Smp_004120	Sjp_0036970
Smp_002080.1	Sjp_0083130		Smp_004160	Sjp_0091450
Smp_002100.1	Sjp_0092870		Smp_004170	Sjp_0091460
Smp_002150.1	Sjp_0100980		Smp_004200	Sjp_0060300
Smp_002160.1	Sjp_0100970		Smp_004280	Sjp_0060370
Smp_002180.1	Sjp_0102880		Smp_004350	Sjp_0011860
Smp_002190.1	Sjp_0102870		Smp_004360	Sjp_0011890
Smp_002230.1	Sjp_0022210		Smp_004480	Sjp_0080930
Smp_002280.1	Sjp_0022180		Smp_004550	Sjp_0035200
Smp_002350.1	Sjp_0025040		Smp_004680	Sjp_0014120
Smp_002380.1	Sjp_0025010		Smp_004710	Sjp_0014150
Smp_002410.1	Sjp_0024970		Smp_004820	Sjp_0016650
Smp_002510.1	Sjp_0039210		Smp_004980	Sjp_0069870
Smp_002550.1	Sjp_0039250		Smp_005000	Sjp_0069860
Smp_002600.1	Sjp_0085250		Smp_005010	Sjp_0077160
Smp_002640.1	Sjp_0032500		Smp_005020	Sjp_0077150
Smp_002740.2	Sjp_0030510		Smp_005060	Sjp_0069900
Smp_002810.1	Sjp_0049080		Smp_005160	Sjp_0025260
Smp_002820.3	Sjp_0049090		Smp_005260	Sjp_0037310
Smp_002840.1	Sjp_0049100		Smp_005280	Sjp_0037330
Smp_002870.1	Sjp_0089930		Smp_005290	Sjp_0103070
Smp_002880.1	Sjp_0089940		Smp_005320	Sjp_0037360
Smp_002920.1	Sjp_0048880		Smp_005330	Sjp_0037370
Smp_002930.1	Sjp_0048860		Smp_005350	Sjp_0074580
Smp_002950.1	Sjp_0050620		Smp_005360	Sjp_0059290
Smp_002960.1	Sjp_0042380		Smp_005390	Sjp_0099100
Smp_003000.1	Sjp_0025570		Smp_005470	Sjp_0132000
Smp_003130.1	Sjp_0057980		Smp_005520	Sjp_0008760
Smp_003140.1	Sjp_0057970		Smp_005570	Sjp_0073150
Smp_003190.1	Sjp_0099370		Smp_005640	Sjp_0038390
Smp_003230.1	Sjp_0023480		Smp_005780	Sjp_0040810
Smp_003250.1	Sjp_0023500		Smp_005880	Sjp_0015800
Smp_003270.1	Sjp_0042570		Smp_005900	Sjp_0015770
Smp_003280.1	Sjp_0023520		Smp_006040	Sjp_0074460
Smp_003300.1	Sjp_0023570		Smp_006060	Sjp_0069550
Smp_003330.1	Sjp_0081490		Smp_006230	Sjp_0092180
Smp_003340.1	Sjp_0081480		Smp_006240	Sjp_0092150
Smp_003410.1	Sjp_0044770		Smp_006300	Sjp_0079860
Smp_003440.1	Sjp_0044800		Smp_006340	Sjp_0095270
Smp_003600.1	Sjp_0098540		Smp_006390	Sjp_0066340
Smp_003610.2	Sjp_0000300		Smp_006590	Sjp_0022420
Smp_003620.1	Sjp_0000290		Smp_006630	Sjp_0022560
Smp_003630.1	Sjp_0000280		Smp_006690	Sjp_0091520
Smp_003660.1	Sjp_0000230		Smp_006700	Sjp_0091530
Smp_003670.1	Sjp_0000220		Smp_006710	Sjp_0033100
Smp_003700.1	Sjp_0000200		Smp_006740	Sjp_0044460
Smp_003710.1	Sjp_0106720		Smp_006780	Sjp_0120450
Smp_003770.1	Sjp_0000130		Smp_006830	Sjp_0070400
Smp_003860.1	Sjp_0000040		Smp_006840	Sjp_0070390
Smp_003900.1	Sjp_0040480		Smp_006850	Sjp_0070380
Smp_003930.1	Sjp_0040540		Smp_007000	Sjp_0020280
Smp_003940.1	Sjp_0040530		Smp_007170	Sjp_0047290
Smp_003970.1	Sjp_0028670		Smp_007180	Sjp_0087090
Smp_003980.1	Sjp_0028660		Smp_007300	Sjp_0037740
Smp_003990.1	Sjp_0028650		Smp_007330	Sjp_0106320
Smp_004000.1	Sjp_0028630		Smp_007380	Sjp_0113220
Smp_004020.1	Sjp_0028610		Smp_007500	Sjp_0094400
Smp_004040.1	Sjp_0028600		Smp_007540	Sjp_0022800
Smp_004060.1	Sjp_0056800		Smp_007550	Sjp_0022850
Smp_004070.1	Sjp_0056790		Smp_007570	Sjp_0022870
Smp_004080.1	Sjp_0056780		Smp_007630	Sjp_0053490
Smp_004090.1	Sjp_0056760		Smp_007660	Sjp_0053470
Smp_004120.1	Sjp_0036970		Smp_007670	Sjp_0053460
Smp_004170.1	Sjp_0091460		Smp_007710	Sjp_0053430
Smp_004200.1	Sjp_0060300		Smp_007890	Sjp_0031910
Smp_004220.1	Sjp_0060310		Smp_007900	Sjp_0031920
Smp_004280.1	Sjp_0060370		Smp_007970	Sjp_0060260
Smp_004310.1	Sjp_0011840		Smp_008120	Sjp_0057440
Smp_004350.1	Sjp_0011860		Smp_008140	Sjp_0057420
Smp_004360.1	Sjp_0011890		Smp_008190	Sjp_0088780
Smp_004470.1	Sjp_0113740		Smp_008220	Sjp_0054730
Smp_004480.1	Sjp_0080930		Smp_008310	Sjp_0101030
Smp_004550.1	Sjp_0035200		Smp_008430	Sjp_0058630
Smp_004590.1	Sjp_0013970		Smp_008440	Sjp_0058640
Smp_004600.1	Sjp_0013990		Smp_008470	Sjp_0058650
Smp_004630.1	Sjp_0014040		Smp_008500	Sjp_0083960
Smp_004640.1	Sjp_0014050		Smp_008545	Sjp_0082590
Smp_004680.1	Sjp_0014120		Smp_008610	Sjp_0086440
Smp_004710.1	Sjp_0014150		Smp_008770	Sjp_0053720
Smp_004730.1	Sjp_0016770		Smp_008860	Sjp_0124540
Smp_004780.1	Sjp_0016730		Smp_008860	Sjp_0068290
Smp_004810.3	Sjp_0016700		Smp_008900	Sjp_0052980
Smp_004820.1	Sjp_0016650		Smp_009020	Sjp_0134320
Smp_004910.1	Sjp_0005410		Smp_009030	Sjp_0068740
Smp_004980.1	Sjp_0069870		Smp_009150	Sjp_0091870
Smp_004990.1	Sjp_0095780		Smp_009250	Sjp_0093650
Smp_005000.1	Sjp_0069860		Smp_009300	Sjp_0117500
Smp_005010.1	Sjp_0077160		Smp_009320	Sjp_0074960
Smp_005020.1	Sjp_0077150		Smp_009390	Sjp_0058260
Smp_005060.1	Sjp_0069900		Smp_009400	Sjp_0058270
Smp_005080.2	Sjp_0025320		Smp_009520	Sjp_0066020
Smp_005160.1	Sjp_0025260		Smp_009530	Sjp_0066070
Smp_005180.1	Sjp_0086240		Smp_009540	Sjp_0066030
Smp_005200.1	Sjp_0025240		Smp_009560	Sjp_0105420
Smp_005210.1	Sjp_0025230		Smp_009690	Sjp_0116280
Smp_005230.2	Sjp_0025210		Smp_009710	Sjp_0109510
Smp_005260.1	Sjp_0037310		Smp_009830	Sjp_0030160
Smp_005280.1	Sjp_0037330		Smp_010090	Sjp_0076120
Smp_005290.1	Sjp_0103070		Smp_010100	Sjp_0092570
Smp_005320.1	Sjp_0037360		Smp_010110	Sjp_0092560
Smp_005330.1	Sjp_0037370		Smp_010140	Sjp_0092550
Smp_005350.1	Sjp_0074580		Smp_010160	Sjp_0056120
Smp_005360.1	Sjp_0059290		Smp_010250	Sjp_0108970
Smp_005390.2	Sjp_0099100		Smp_010280	Sjp_0030080
Smp_005500.1	Sjp_0008730		Smp_010290	Sjp_0057850
Smp_005520.1	Sjp_0008760		Smp_010400	Sjp_0043270
Smp_005570.1	Sjp_0073150		Smp_010450	Sjp_0044700
Smp_005640.1	Sjp_0038390		Smp_010470	Sjp_0044690
Smp_005670.1	Sjp_0053650		Smp_010620	Sjp_0028430
Smp_005720.1	Sjp_0055340		Smp_010710	Sjp_0049230
Smp_005740.1	Sjp_0112240		Smp_010820	Sjp_0065470
Smp_005780.1	Sjp_0040810		Smp_010900	Sjp_0013180
Smp_005790.1	Sjp_0040830		Smp_010930	Sjp_0042590
Smp_005860.1	Sjp_0111740		Smp_010940	Sjp_0042580
Smp_005880.1	Sjp_0015800		Smp_011010	Sjp_0115740
Smp_005900.1	Sjp_0015770		Smp_011030	Sjp_0052650
Smp_005910.1	Sjp_0111280		Smp_011150	Sjp_0074330
Smp_006000.1	Sjp_0015700		Smp_011180	Sjp_0046510
Smp_006040.1	Sjp_0074460		Smp_011220	Sjp_0009870
Smp_006060.1	Sjp_0069550		Smp_011270	Sjp_0074290
Smp_006230.1	Sjp_0092180		Smp_011560	Sjp_0067710
Smp_006250.1	Sjp_0101820		Smp_011570	Sjp_0005660
Smp_006300.1	Sjp_0079860		Smp_011600	Sjp_0080720
Smp_006320.1	Sjp_0115200		Smp_011640	Sjp_0005630
Smp_006340.1	Sjp_0095270		Smp_011680	Sjp_0063070
Smp_006350.1	Sjp_0134500		Smp_011710	Sjp_0130740
Smp_006390.1	Sjp_0066340		Smp_011720	Sjp_0058950
Smp_006440.1	Sjp_0066380		Smp_011740	Sjp_0058980
Smp_006520.1	Sjp_0028090		Smp_011860	Sjp_0052610
Smp_006550.1	Sjp_0038240		Smp_011870	Sjp_0052600
Smp_006560.1	Sjp_0022500		Smp_011960	Sjp_0095100
Smp_006590.1	Sjp_0022420		Smp_011980	Sjp_0072000
Smp_006630.2	Sjp_0022560		Smp_011990	Sjp_0072010
Smp_006680.1	Sjp_0033080		Smp_012010	Sjp_0030830
Smp_006690.1	Sjp_0091520		Smp_012030	Sjp_0129030
Smp_006700.1	Sjp_0091530		Smp_012070	Sjp_0061140
Smp_006710.1	Sjp_0033100		Smp_012110	Sjp_0098440
Smp_006720.2	Sjp_0033090		Smp_012150	Sjp_0073080
Smp_006740.1	Sjp_0044460		Smp_012200	Sjp_0067630
Smp_006760.1	Sjp_0044450		Smp_012280	Sjp_0030270
Smp_006780.1	Sjp_0120450		Smp_012380	Sjp_0070330
Smp_006810.1	Sjp_0034070		Smp_012410	Sjp_0093020
Smp_006830.1	Sjp_0070400		Smp_012480	Sjp_0050150
Smp_006840.1	Sjp_0070390		Smp_012530	Sjp_0050180
Smp_006850.1	Sjp_0070380		Smp_012570	Sjp_0065870
Smp_006930.1	Sjp_0130670		Smp_012680	Sjp_0022580
Smp_006970.1	Sjp_0059780		Smp_012690	Sjp_0022520
Smp_006990.1	Sjp_0020290		Smp_012720	Sjp_0022510
Smp_007000.1	Sjp_0020280		Smp_012740	Sjp_0044400
Smp_007070.1	Sjp_0135000		Smp_012750	Sjp_0113150
Smp_007170.1	Sjp_0047290		Smp_012780	Sjp_0057800
Smp_007180.1	Sjp_0087090		Smp_012790	Sjp_0057790
Smp_007210.1	Sjp_0047320		Smp_012800	Sjp_0057780
Smp_007260.1	Sjp_0047360		Smp_012810	Sjp_0057770
Smp_007270.1	Sjp_0055050		Smp_012920	Sjp_0089000
Smp_007300.1	Sjp_0037740		Smp_012930	Sjp_0061360
Smp_007330.1	Sjp_0037760		Smp_012980	Sjp_0029780
Smp_007380.1	Sjp_0113220		Smp_013050	Sjp_0006790
Smp_007450.2	Sjp_0130080		Smp_013080	Sjp_0006750
Smp_007500.1	Sjp_0094400		Smp_013080	Sjp_0006740
Smp_007510.1	Sjp_0094420		Smp_013150	Sjp_0086090
Smp_007540.1	Sjp_0022800		Smp_013200	Sjp_0046280
Smp_007550.1	Sjp_0022850		Smp_013200	Sjp_0037300
Smp_007570.1	Sjp_0022870		Smp_013300	Sjp_0132440
Smp_007630.1	Sjp_0053490		Smp_013360	Sjp_0069350
Smp_007640.1	Sjp_0097780		Smp_013360	Sjp_0128520
Smp_007660.1	Sjp_0053470		Smp_013370	Sjp_0069320
Smp_007670.1	Sjp_0053460		Smp_013470	Sjp_0120960
Smp_007690.1	Sjp_0053450		Smp_013520	Sjp_0021420
Smp_007710.1	Sjp_0053430		Smp_013570	Sjp_0048820
Smp_007760.1	Sjp_0018880		Smp_013610	Sjp_0048770
Smp_007770.1	Sjp_0118610		Smp_013690	Sjp_0056700
Smp_007780.1	Sjp_0052510		Smp_013810	Sjp_0061320
Smp_007890.2	Sjp_0031910		Smp_013860	Sjp_0005910
Smp_007900.1	Sjp_0031920		Smp_013870	Sjp_0104260
Smp_007950.1	Sjp_0060240		Smp_013930	Sjp_0020040
Smp_007970.1	Sjp_0060260		Smp_014010	Sjp_0020080
Smp_008070.1	Sjp_0039090		Smp_014050	Sjp_0012270
Smp_008120.1	Sjp_0057440		Smp_014290	Sjp_0110450
Smp_008140.1	Sjp_0057420		Smp_014400	Sjp_0018430
Smp_008170.1	Sjp_0057390		Smp_014610	Sjp_0024010
Smp_008190.1	Sjp_0088780		Smp_014620	Sjp_0024020
Smp_008220.1	Sjp_0054730		Smp_014650	Sjp_0024040
Smp_008230.1	Sjp_0098680		Smp_014680	Sjp_0024060
Smp_008260.1	Sjp_0026020		Smp_014730	Sjp_0076800
Smp_008290.1	Sjp_0018250		Smp_014800	Sjp_0118570
Smp_008310.1	Sjp_0101030		Smp_014820	Sjp_0109110
Smp_008320.1	Sjp_0022990		Smp_014850	Sjp_0071560
Smp_008340.1	Sjp_0064930		Smp_015100	Sjp_0014180
Smp_008360.1	Sjp_0081310		Smp_015190	Sjp_0086200
Smp_008430.1	Sjp_0058630		Smp_015220	Sjp_0006080
Smp_008440.1	Sjp_0058640		Smp_015390	Sjp_0027650
Smp_008450.1	Sjp_0058620		Smp_015510	Sjp_0052910
Smp_008470.1	Sjp_0058650		Smp_015520	Sjp_0052900
Smp_008490.1	Sjp_0058590		Smp_015530	Sjp_0052890
Smp_008500.2	Sjp_0083960		Smp_015670	Sjp_0025520
Smp_008545.1	Sjp_0082590		Smp_015690	Sjp_0025560
Smp_008580.1	Sjp_0007790		Smp_015710	Sjp_0044610
Smp_008610.1	Sjp_0086440		Smp_015800	Sjp_0001550
Smp_008620.1	Sjp_0086430		Smp_015820	Sjp_0001480
Smp_008710.1	Sjp_0053740		Smp_015840	Sjp_0034430
Smp_008770.1	Sjp_0053720		Smp_015860	Sjp_0034450
Smp_008830.1	Sjp_0053770		Smp_015900	Sjp_0000660
Smp_008850.1	Sjp_0117020		Smp_015980	Sjp_0000640
Smp_008860.1	Sjp_0124540		Smp_016090	Sjp_0073340
Smp_008900.1	Sjp_0052980		Smp_016130	Sjp_0036650
Smp_009020.1	Sjp_0134320		Smp_016340	Sjp_0051110
Smp_009030.1	Sjp_0068740		Smp_016410	Sjp_0088510
Smp_009040.1	Sjp_0130780		Smp_016490	Sjp_0038500
Smp_009070.1	Sjp_0089400		Smp_016550	Sjp_0038540
Smp_009150.1	Sjp_0091870		Smp_016640	Sjp_0013610
Smp_009250.1	Sjp_0093650		Smp_016730	Sjp_0049880
Smp_009300.1	Sjp_0117500		Smp_016810	Sjp_0102560
Smp_009310.2	Sjp_0074950		Smp_016840	Sjp_0085850
Smp_009320.2	Sjp_0074960		Smp_016880	Sjp_0028300
Smp_009390.2	Sjp_0058260		Smp_016890	Sjp_0028340
Smp_009400.1	Sjp_0058270		Smp_016900	Sjp_0028330
Smp_009430.1	Sjp_0058300		Smp_016990	Sjp_0038880
Smp_009520.1	Sjp_0066020		Smp_017010	Sjp_0092310
Smp_009530.1	Sjp_0066070		Smp_017080	Sjp_0072430
Smp_009540.1	Sjp_0066030		Smp_017090	Sjp_0072440
Smp_009550.1	Sjp_0066040		Smp_017230	Sjp_0036540
Smp_009560.1	Sjp_0105420		Smp_017230	Sjp_0036530
Smp_009580.1	Sjp_0066050		Smp_017350	Sjp_0082540
Smp_009600.1	Sjp_0117190		Smp_017450	Sjp_0033940
Smp_009630.1	Sjp_0073990		Smp_017470	Sjp_0010600
Smp_009650.1	Sjp_0027410		Smp_017520	Sjp_0051020
Smp_009690.1	Sjp_0116280		Smp_017610	Sjp_0007180
Smp_009710.2	Sjp_0085190		Smp_017620	Sjp_0007190
Smp_009760.1	Sjp_0030210		Smp_017640	Sjp_0007010
Smp_009800.1	Sjp_0030190		Smp_017660	Sjp_0007030
Smp_009810.1	Sjp_0030180		Smp_017730	Sjp_0131380
Smp_009830.1	Sjp_0030160		Smp_017750	Sjp_0129740
Smp_009990.1	Sjp_0070030		Smp_017860	Sjp_0073360
Smp_010090.1	Sjp_0076120		Smp_017880	Sjp_0083620
Smp_010100.1	Sjp_0092570		Smp_017890	Sjp_0131530
Smp_010110.1	Sjp_0092560		Smp_017990	Sjp_0120770
Smp_010140.1	Sjp_0092550		Smp_018020	Sjp_0000910
Smp_010160.1	Sjp_0056120		Smp_018030	Sjp_0120230
Smp_010250.1	Sjp_0108970		Smp_018160	Sjp_0085980
Smp_010260.1	Sjp_0030070		Smp_018220	Sjp_0116870
Smp_010280.1	Sjp_0030080		Smp_018220	Sjp_0130540
Smp_010290.1	Sjp_0057850		Smp_018250	Sjp_0026420
Smp_010370.1	Sjp_0043310		Smp_018260	Sjp_0026410
Smp_010400.1	Sjp_0043270		Smp_018280	Sjp_0026390
Smp_010450.1	Sjp_0044700		Smp_018310	Sjp_0026360
Smp_010470.1	Sjp_0044690		Smp_018360	Sjp_0026320
Smp_010620.1	Sjp_0028430		Smp_018400	Sjp_0058680
Smp_010670.1	Sjp_0028400		Smp_018430	Sjp_0058700
Smp_010690.1	Sjp_0049250		Smp_018440	Sjp_0111310
Smp_010710.1	Sjp_0049230		Smp_018460	Sjp_0033240
Smp_010720.1	Sjp_0049210		Smp_018480	Sjp_0033250
Smp_010770.1	Sjp_0044090		Smp_018490	Sjp_0076030
Smp_010800.1	Sjp_0061460		Smp_018530	Sjp_0076000
Smp_010820.1	Sjp_0065470		Smp_018530	Sjp_0128260
Smp_010900.1	Sjp_0013180		Smp_018530	Sjp_0128170
Smp_010930.1	Sjp_0042590		Smp_018530	Sjp_0117880
Smp_010940.1	Sjp_0042580		Smp_018550	Sjp_0033320
Smp_011000.1	Sjp_0060000		Smp_018580	Sjp_0033290
Smp_011010.1	Sjp_0115740		Smp_018610	Sjp_0033270
Smp_011030.1	Sjp_0052650		Smp_018640	Sjp_0095380
Smp_011120.1	Sjp_0009900		Smp_018690	Sjp_0083570
Smp_011150.1	Sjp_0074330		Smp_018710	Sjp_0043580
Smp_011180.1	Sjp_0046510		Smp_018720	Sjp_0043590
Smp_011220.1	Sjp_0009870		Smp_018730	Sjp_0111130
Smp_011230.1	Sjp_0074300		Smp_018790	Sjp_0043650
Smp_011270.3	Sjp_0074290		Smp_018870	Sjp_0067550
Smp_011430.1	Sjp_0095350		Smp_018920	Sjp_0080380
Smp_011450.1	Sjp_0016680		Smp_018940	Sjp_0071450
Smp_011560.1	Sjp_0067710		Smp_018950	Sjp_0071460
Smp_011570.1	Sjp_0005660		Smp_018980	Sjp_0073940
Smp_011600.1	Sjp_0080720		Smp_018980	Sjp_0097900
Smp_011640.1	Sjp_0005630		Smp_018990	Sjp_0075950
Smp_011660.2	Sjp_0121020		Smp_019010	Sjp_0090260
Smp_011680.1	Sjp_0063070		Smp_019030	Sjp_0043440
Smp_011700.1	Sjp_0095240		Smp_019040	Sjp_0043450
Smp_011710.1	Sjp_0130740		Smp_019050	Sjp_0043470
Smp_011720.1	Sjp_0058950		Smp_019060	Sjp_0043480
Smp_011740.1	Sjp_0058980		Smp_019130	Sjp_0062400
Smp_011860.1	Sjp_0052610		Smp_019190	Sjp_0087170
Smp_011870.1	Sjp_0052600		Smp_019200	Sjp_0073950
Smp_011960.1	Sjp_0095100		Smp_019260	Sjp_0070790
Smp_011980.1	Sjp_0072000		Smp_019340	Sjp_0100260
Smp_011990.1	Sjp_0072010		Smp_019380	Sjp_0002730
Smp_012000.1	Sjp_0131150		Smp_019380	Sjp_0002720
Smp_012010.1	Sjp_0030830		Smp_019430	Sjp_0002800
Smp_012030.1	Sjp_0129030		Smp_019440	Sjp_0002810
Smp_012070.1	Sjp_0061140		Smp_019610	Sjp_0113790
Smp_012110.1	Sjp_0098440		Smp_019630	Sjp_0113330
Smp_012150.1	Sjp_0073080		Smp_019680	Sjp_0075020
Smp_012200.1	Sjp_0067630		Smp_019690	Sjp_0119490
Smp_012230.1	Sjp_0030350		Smp_019730	Sjp_0057070
Smp_012280.1	Sjp_0030270		Smp_019750	Sjp_0096720
Smp_012340.1	Sjp_0070300		Smp_019820	Sjp_0064000
Smp_012350.1	Sjp_0070310		Smp_019840	Sjp_0086130
Smp_012380.1	Sjp_0070330		Smp_019860	Sjp_0112910
Smp_012410.1	Sjp_0093020		Smp_019900	Sjp_0065100
Smp_012440.1	Sjp_0093040		Smp_019920	Sjp_0064390
Smp_012450.1	Sjp_0083860		Smp_019940	Sjp_0065040
Smp_012460.1	Sjp_0083840		Smp_019980	Sjp_0051720
Smp_012470.1	Sjp_0050140		Smp_020050	Sjp_0051650
Smp_012480.1	Sjp_0050150		Smp_020060	Sjp_0051640
Smp_012530.1	Sjp_0050180		Smp_020070	Sjp_0120910
Smp_012570.1	Sjp_0065870		Smp_020070	Sjp_0120900
Smp_012580.1	Sjp_0065880		Smp_020090	Sjp_0070660
Smp_012680.1	Sjp_0022580		Smp_020120	Sjp_0079170
Smp_012690.1	Sjp_0022520		Smp_020130	Sjp_0079180
Smp_012720.1	Sjp_0022510		Smp_020210	Sjp_0043770
Smp_012740.2	Sjp_0044400		Smp_020220	Sjp_0043790
Smp_012750.1	Sjp_0113150		Smp_020400	Sjp_0046580
Smp_012780.1	Sjp_0057800		Smp_020450	Sjp_0038650
Smp_012790.1	Sjp_0057790		Smp_020590	Sjp_0071230
Smp_012800.1	Sjp_0057780		Smp_020660	Sjp_0001190
Smp_012810.1	Sjp_0057770		Smp_020760	Sjp_0001330
Smp_012860.1	Sjp_0057740		Smp_020770	Sjp_0001310
Smp_012900.1	Sjp_0074440		Smp_020770	Sjp_0110220
Smp_012920.1	Sjp_0089000		Smp_020800	Sjp_0001280
Smp_012930.1	Sjp_0061360		Smp_020960	Sjp_0095250
Smp_012980.1	Sjp_0029780		Smp_021040	Sjp_0043970
Smp_013040.1	Sjp_0006800		Smp_021080	Sjp_0043960
Smp_013050.1	Sjp_0006790		Smp_021100	Sjp_0043900
Smp_013060.1	Sjp_0006780		Smp_021130	Sjp_0043920
Smp_013070.1	Sjp_0006770		Smp_021140	Sjp_0043930
Smp_013080.1	Sjp_0006750		Smp_021190	Sjp_0043870
Smp_013150.1	Sjp_0086090		Smp_021220	Sjp_0103560
Smp_013200.2	Sjp_0046280		Smp_021260	Sjp_0078810
Smp_013300.1	Sjp_0129230		Smp_021290	Sjp_0009990
Smp_013360.1	Sjp_0069350		Smp_021320	Sjp_0038560
Smp_013370.3	Sjp_0069320		Smp_021340	Sjp_0133120
Smp_013440.1	Sjp_0102570		Smp_021390	Sjp_0088280
Smp_013460.1	Sjp_0078610		Smp_021550	Sjp_0001750
Smp_013470.1	Sjp_0069310		Smp_021750	Sjp_0050550
Smp_013520.1	Sjp_0021420		Smp_021760	Sjp_0050560
Smp_013540.1	Sjp_0130760		Smp_021790	Sjp_0075300
Smp_013570.1	Sjp_0048820		Smp_021800	Sjp_0075310
Smp_013600.1	Sjp_0048780		Smp_021830	Sjp_0005350
Smp_013610.1	Sjp_0048770		Smp_021870	Sjp_0103700
Smp_013630.1	Sjp_0092980		Smp_021910	Sjp_0105150
Smp_013690.1	Sjp_0056700		Smp_022020	Sjp_0081000
Smp_013790.1	Sjp_0061330		Smp_022070	Sjp_0129590
Smp_013810.1	Sjp_0061320		Smp_022110	Sjp_0056660
Smp_013840.2	Sjp_0009970		Smp_022130	Sjp_0090630
Smp_013860.1	Sjp_0005910		Smp_022140	Sjp_0090620
Smp_013870.1	Sjp_0104260		Smp_022150	Sjp_0001910
Smp_013930.1	Sjp_0020040		Smp_022170	Sjp_0088790
Smp_013950.1	Sjp_0020050		Smp_022300	Sjp_0011080
Smp_014010.1	Sjp_0020080		Smp_022320	Sjp_0011050
Smp_014020.1	Sjp_0020090		Smp_022340	Sjp_0106490
Smp_014050.1	Sjp_0012270		Smp_022400	Sjp_0101640
Smp_014080.1	Sjp_0012250		Smp_022450	Sjp_0015240
Smp_014170.2	Sjp_0068380		Smp_022450	Sjp_0104900
Smp_014260.1	Sjp_0049800		Smp_022450	Sjp_0065730
Smp_014280.1	Sjp_0049790		Smp_022460	Sjp_0015250
Smp_014290.1	Sjp_0110450		Smp_022470	Sjp_0015260
Smp_014400.3	Sjp_0018430		Smp_022500	Sjp_0093860
Smp_014420.1	Sjp_0018440		Smp_022540	Sjp_0093840
Smp_014570.2	Sjp_0023970		Smp_022560	Sjp_0069130
Smp_014610.1	Sjp_0024010		Smp_022570	Sjp_0069120
Smp_014620.1	Sjp_0024020		Smp_022610	Sjp_0073180
Smp_014650.1	Sjp_0024040		Smp_022630	Sjp_0085290
Smp_014660.2	Sjp_0023950		Smp_022640	Sjp_0093550
Smp_014670.2	Sjp_0024050		Smp_022740	Sjp_0015400
Smp_014730.1	Sjp_0076800		Smp_022760	Sjp_0121880
Smp_014780.2	Sjp_0086910		Smp_022870	Sjp_0108150
Smp_014800.2	Sjp_0118570		Smp_022890	Sjp_0004750
Smp_014820.1	Sjp_0109110		Smp_023010	Sjp_0050240
Smp_014850.1	Sjp_0071560		Smp_023160	Sjp_0028960
Smp_015030.1	Sjp_0016450		Smp_023170	Sjp_0028970
Smp_015050.1	Sjp_0016440		Smp_023230	Sjp_0085360
Smp_015070.1	Sjp_0105900		Smp_023240	Sjp_0085370
Smp_015090.1	Sjp_0016400		Smp_023250	Sjp_0085380
Smp_015100.1	Sjp_0014180		Smp_023270	Sjp_0085400
Smp_015190.1	Sjp_0086200		Smp_023360	Sjp_0007710
Smp_015220.1	Sjp_0006080		Smp_023470	Sjp_0007600
Smp_015390.1	Sjp_0027650		Smp_023530	Sjp_0007550
Smp_015440.1	Sjp_0079800		Smp_023620	Sjp_0045730
Smp_015510.1	Sjp_0052910		Smp_023660	Sjp_0045690
Smp_015520.1	Sjp_0052900		Smp_023670	Sjp_0045700
Smp_015530.2	Sjp_0052890		Smp_023700	Sjp_0011510
Smp_015630.1	Sjp_0034810		Smp_023840	Sjp_0099230
Smp_015670.1	Sjp_0025520		Smp_023940	Sjp_0051210
Smp_015690.1	Sjp_0025560		Smp_024000	Sjp_0062010
Smp_015710.1	Sjp_0076750		Smp_024010	Sjp_0061990
Smp_015720.1	Sjp_0078060		Smp_024010	Sjp_0061980
Smp_015800.1	Sjp_0001550		Smp_024030	Sjp_0023780
Smp_015820.1	Sjp_0034410		Smp_024060	Sjp_0089880
Smp_015840.1	Sjp_0034430		Smp_024110	Sjp_0054230
Smp_015850.3	Sjp_0034440		Smp_024120	Sjp_0054240
Smp_015860.1	Sjp_0034450		Smp_024240	Sjp_0006070
Smp_015900.1	Sjp_0000660		Smp_024240	Sjp_0006060
Smp_015920.1	Sjp_0000680		Smp_024290	Sjp_0088830
Smp_015980.1	Sjp_0000640		Smp_024290	Sjp_0088840
Smp_016050.1	Sjp_0048390		Smp_024370	Sjp_0080410
Smp_016090.1	Sjp_0036570		Smp_024380	Sjp_0073590
Smp_016130.1	Sjp_0036650		Smp_024390	Sjp_0073580
Smp_016180.1	Sjp_0036610		Smp_024450	Sjp_0061730
Smp_016200.3	Sjp_0036600		Smp_024490	Sjp_0068400
Smp_016230.1	Sjp_0104490		Smp_024500	Sjp_0085620
Smp_016250.1	Sjp_0019060		Smp_024580	Sjp_0060890
Smp_016340.1	Sjp_0051110		Smp_024590	Sjp_0060880
Smp_016380.1	Sjp_0082690		Smp_024780	Sjp_0016210
Smp_016390.1	Sjp_0057110		Smp_024800	Sjp_0016240
Smp_016410.1	Sjp_0088510		Smp_024810	Sjp_0016250
Smp_016490.1	Sjp_0038500		Smp_024820	Sjp_0110950
Smp_016550.2	Sjp_0038540		Smp_024850	Sjp_0034040
Smp_016600.1	Sjp_0037260		Smp_024860	Sjp_0034030
Smp_016640.1	Sjp_0013610		Smp_024870	Sjp_0034020
Smp_016730.1	Sjp_0049880		Smp_024880	Sjp_0034010
Smp_016780.1	Sjp_0049920		Smp_024900	Sjp_0034000
Smp_016810.1	Sjp_0102560		Smp_024970	Sjp_0021670
Smp_016840.1	Sjp_0040340		Smp_025010	Sjp_0021650
Smp_016870.1	Sjp_0028290		Smp_025020	Sjp_0021690
Smp_016880.1	Sjp_0028300		Smp_025030	Sjp_0021710
Smp_016890.1	Sjp_0028340		Smp_025130	Sjp_0028480
Smp_016900.1	Sjp_0028330		Smp_025150	Sjp_0028500
Smp_016910.1	Sjp_0028320		Smp_025160	Sjp_0028510
Smp_016920.1	Sjp_0028350		Smp_025260	Sjp_0117790
Smp_016990.1	Sjp_0038880		Smp_025360	Sjp_0013840
Smp_017010.1	Sjp_0092310		Smp_025440	Sjp_0052200
Smp_017020.1	Sjp_0072380		Smp_025550	Sjp_0112410
Smp_017070.1	Sjp_0072420		Smp_025550	Sjp_0095560
Smp_017080.1	Sjp_0072430		Smp_025560	Sjp_0107350
Smp_017090.1	Sjp_0072440		Smp_025570	Sjp_0098940
Smp_017230.1	Sjp_0036540		Smp_025620	Sjp_0077700
Smp_017280.1	Sjp_0052570		Smp_025670	Sjp_0077630
Smp_017350.1	Sjp_0082540		Smp_025700	Sjp_0077620
Smp_017360.1	Sjp_0082530		Smp_025750	Sjp_0007820
Smp_017420.1	Sjp_0090510		Smp_025800	Sjp_0090370
Smp_017430.1	Sjp_0010560		Smp_025860	Sjp_0091280
Smp_017450.1	Sjp_0033940		Smp_025890	Sjp_0072810
Smp_017470.1	Sjp_0010600		Smp_025950	Sjp_0094070
Smp_017520.1	Sjp_0097990		Smp_026040	Sjp_0113840
Smp_017610.1	Sjp_0007180		Smp_026090	Sjp_0050910
Smp_017620.1	Sjp_0007190		Smp_026160	Sjp_0081530
Smp_017640.1	Sjp_0007010		Smp_026230	Sjp_0029800
Smp_017660.1	Sjp_0007030		Smp_026250	Sjp_0029820
Smp_017710.1	Sjp_0060740		Smp_026280	Sjp_0029850
Smp_017720.1	Sjp_0060750		Smp_026300	Sjp_0029870
Smp_017730.1	Sjp_0097880		Smp_026310	Sjp_0029890
Smp_017750.1	Sjp_0037500		Smp_026340	Sjp_0029910
Smp_017810.1	Sjp_0063900		Smp_026390	Sjp_0029940
Smp_017860.1	Sjp_0073360		Smp_026400	Sjp_0022070
Smp_017880.1	Sjp_0083620		Smp_026560	Sjp_0063680
Smp_017890.1	Sjp_0083630		Smp_026670	Sjp_0069080
Smp_017900.1	Sjp_0091080		Smp_026770	Sjp_0092330
Smp_017980.1	Sjp_0131540		Smp_026820	Sjp_0073550
Smp_017990.1	Sjp_0120770		Smp_026830	Sjp_0073540
Smp_018010.1	Sjp_0048730		Smp_026910	Sjp_0085940
Smp_018020.1	Sjp_0000910		Smp_027080	Sjp_0049330
Smp_018030.1	Sjp_0120230		Smp_027210	Sjp_0003980
Smp_018120.1	Sjp_0111770		Smp_027220	Sjp_0003970
Smp_018150.1	Sjp_0036240		Smp_027240	Sjp_0015030
Smp_018160.1	Sjp_0085980		Smp_027250	Sjp_0015040
Smp_018170.1	Sjp_0075320		Smp_027290	Sjp_0015070
Smp_018220.2	Sjp_0116870		Smp_027340	Sjp_0015170
Smp_018240.3	Sjp_0085890		Smp_027370	Sjp_0015190
Smp_018250.1	Sjp_0026420		Smp_027450	Sjp_0064970
Smp_018260.1	Sjp_0026410		Smp_027480	Sjp_0055480
Smp_018280.1	Sjp_0026390		Smp_027500	Sjp_0073300
Smp_018290.1	Sjp_0108440		Smp_027850	Sjp_0002000
Smp_018310.1	Sjp_0026360		Smp_027870	Sjp_0002010
Smp_018360.1	Sjp_0026320		Smp_027880	Sjp_0002020
Smp_018400.1	Sjp_0058680		Smp_027910	Sjp_0086000
Smp_018430.1	Sjp_0058700		Smp_028050	Sjp_0029390
Smp_018440.1	Sjp_0111310		Smp_028060	Sjp_0029380
Smp_018460.1	Sjp_0033240		Smp_028070	Sjp_0134430
Smp_018480.1	Sjp_0033250		Smp_028140	Sjp_0069410
Smp_018490.1	Sjp_0076030		Smp_028150	Sjp_0091540
Smp_018530.2	Sjp_0076000		Smp_028200	Sjp_0009420
Smp_018550.1	Sjp_0033320		Smp_028330	Sjp_0009350
Smp_018570.1	Sjp_0033300		Smp_028340	Sjp_0009340
Smp_018580.1	Sjp_0033290		Smp_028360	Sjp_0009290
Smp_018590.1	Sjp_0033280		Smp_028370	Sjp_0009280
Smp_018610.1	Sjp_0033270		Smp_028410	Sjp_0009200
Smp_018620.1	Sjp_0095400		Smp_028490	Sjp_0118370
Smp_018640.1	Sjp_0095380		Smp_028650	Sjp_0009090
Smp_018670.1	Sjp_0058860		Smp_028930	Sjp_0069210
Smp_018680.1	Sjp_0058850		Smp_028980	Sjp_0033590
Smp_018690.1	Sjp_0083570		Smp_029060	Sjp_0033520
Smp_018710.1	Sjp_0043580		Smp_029100	Sjp_0067570
Smp_018720.1	Sjp_0043590		Smp_029150	Sjp_0040280
Smp_018760.1	Sjp_0043610		Smp_029160	Sjp_0040270
Smp_018790.1	Sjp_0043650		Smp_029210	Sjp_0040220
Smp_018870.1	Sjp_0067550		Smp_029360	Sjp_0070770
Smp_018890.1	Sjp_0031010		Smp_029370	Sjp_0057060
Smp_018920.1	Sjp_0080380		Smp_029480	Sjp_0015830
Smp_018940.1	Sjp_0071450		Smp_029480	Sjp_0092050
Smp_018950.1	Sjp_0071460		Smp_029480	Sjp_0015860
Smp_018980.1	Sjp_0073940		Smp_029480	Sjp_0015850
Smp_018990.1	Sjp_0075950		Smp_029480	Sjp_0015840
Smp_019010.1	Sjp_0090260		Smp_029670	Sjp_0012020
Smp_019030.1	Sjp_0043440		Smp_029700	Sjp_0011960
Smp_019040.1	Sjp_0105640		Smp_029740	Sjp_0011940
Smp_019050.1	Sjp_0043470		Smp_029790	Sjp_0106920
Smp_019060.1	Sjp_0043480		Smp_029820	Sjp_0100910
Smp_019100.1	Sjp_0002850		Smp_029930	Sjp_0098170
Smp_019130.1	Sjp_0062400		Smp_029930	Sjp_0122940
Smp_019190.1	Sjp_0087170		Smp_029940	Sjp_0097040
Smp_019200.1	Sjp_0073950		Smp_029970	Sjp_0078460
Smp_019210.1	Sjp_0088800		Smp_029990	Sjp_0025500
Smp_019260.1	Sjp_0070790		Smp_030010	Sjp_0025480
Smp_019280.1	Sjp_0079660		Smp_030020	Sjp_0025470
Smp_019310.1	Sjp_0108650		Smp_030150	Sjp_0025370
Smp_019340.1	Sjp_0100260		Smp_030180	Sjp_0070060
Smp_019380.1	Sjp_0002730		Smp_030220	Sjp_0070070
Smp_019420.1	Sjp_0129750		Smp_030250	Sjp_0096630
Smp_019430.1	Sjp_0002800		Smp_030260	Sjp_0012100
Smp_019440.1	Sjp_0002810		Smp_030280	Sjp_0012110
Smp_019490.4	Sjp_0009540		Smp_030290	Sjp_0012120
Smp_019610.1	Sjp_0113790		Smp_030300	Sjp_0012130
Smp_019630.1	Sjp_0113330		Smp_030330	Sjp_0012160
Smp_019640.1	Sjp_0088950		Smp_030440	Sjp_0056610
Smp_019680.1	Sjp_0075020		Smp_030780	Sjp_0112450
Smp_019690.1	Sjp_0119490		Smp_030830	Sjp_0036890
Smp_019730.2	Sjp_0057070		Smp_030870	Sjp_0036930
Smp_019750.2	Sjp_0096720		Smp_030910	Sjp_0080450
Smp_019760.1	Sjp_0096710		Smp_030920	Sjp_0106930
Smp_019790.1	Sjp_0086110		Smp_030930	Sjp_0054660
Smp_019820.1	Sjp_0064000		Smp_031020	Sjp_0077790
Smp_019840.2	Sjp_0086130		Smp_031040	Sjp_0069070
Smp_019860.1	Sjp_0112910		Smp_031050	Sjp_0085020
Smp_019880.1	Sjp_0129020		Smp_031070	Sjp_0085030
Smp_019890.1	Sjp_0112900		Smp_031100	Sjp_0029170
Smp_019900.1	Sjp_0065100		Smp_031220	Sjp_0029070
Smp_019920.1	Sjp_0064390		Smp_031270	Sjp_0049770
Smp_019940.1	Sjp_0065040		Smp_031310	Sjp_0049740
Smp_019980.1	Sjp_0051690		Smp_031360	Sjp_0049720
Smp_019990.1	Sjp_0051710		Smp_031530	Sjp_0014380
Smp_020040.2	Sjp_0051660		Smp_031560	Sjp_0014360
Smp_020050.1	Sjp_0051650		Smp_031570	Sjp_0014350
Smp_020060.1	Sjp_0051640		Smp_031590	Sjp_0014330
Smp_020070.1	Sjp_0120910		Smp_031690	Sjp_0069050
Smp_020080.1	Sjp_0037230		Smp_031710	Sjp_0058220
Smp_020090.1	Sjp_0070660		Smp_031730	Sjp_0058200
Smp_020120.1	Sjp_0079170		Smp_031860	Sjp_0054900
Smp_020130.1	Sjp_0079180		Smp_031880	Sjp_0054870
Smp_020170.1	Sjp_0092750		Smp_031990	Sjp_0031480
Smp_020200.1	Sjp_0043800		Smp_032060	Sjp_0071370
Smp_020210.1	Sjp_0043770		Smp_032230	Sjp_0027450
Smp_020220.1	Sjp_0043790		Smp_032230	Sjp_0027440
Smp_020270.1	Sjp_0099010		Smp_032240	Sjp_0027420
Smp_020300.1	Sjp_0046610		Smp_032250	Sjp_0027430
Smp_020370.1	Sjp_0046590		Smp_032260	Sjp_0027400
Smp_020400.1	Sjp_0046580		Smp_032280	Sjp_0090930
Smp_020450.1	Sjp_0038650		Smp_032310	Sjp_0003110
Smp_020480.1	Sjp_0039350		Smp_032310	Sjp_0003100
Smp_020540.2	Sjp_0104230		Smp_032320	Sjp_0003120
Smp_020550.1	Sjp_0073100		Smp_032420	Sjp_0096100
Smp_020590.1	Sjp_0071230		Smp_032480	Sjp_0051510
Smp_020760.1	Sjp_0001330		Smp_032490	Sjp_0051520
Smp_020770.1	Sjp_0001310		Smp_032510	Sjp_0051530
Smp_020800.1	Sjp_0001280		Smp_032640	Sjp_0020260
Smp_020920.1	Sjp_0094860		Smp_032740	Sjp_0095470
Smp_020960.1	Sjp_0095250		Smp_032740	Sjp_0083810
Smp_021040.1	Sjp_0043970		Smp_032760	Sjp_0059680
Smp_021060.1	Sjp_0046650		Smp_032770	Sjp_0059670
Smp_021070.1	Sjp_0043980		Smp_032780	Sjp_0059720
Smp_021080.1	Sjp_0043960		Smp_032920	Sjp_0083740
Smp_021100.1	Sjp_0043900		Smp_032930	Sjp_0118330
Smp_021130.1	Sjp_0043920		Smp_032950	Sjp_0102250
Smp_021140.1	Sjp_0043930		Smp_033000	Sjp_0114010
Smp_021160.1	Sjp_0043890		Smp_033020	Sjp_0115610
Smp_021170.1	Sjp_0043880		Smp_033050	Sjp_0092890
Smp_021190.1	Sjp_0043870		Smp_033150	Sjp_0027570
Smp_021220.1	Sjp_0103560		Smp_033200	Sjp_0014210
Smp_021260.1	Sjp_0078810		Smp_033260	Sjp_0033730
Smp_021290.1	Sjp_0009990		Smp_033330	Sjp_0033350
Smp_021300.1	Sjp_0010020		Smp_033400	Sjp_0038590
Smp_021320.1	Sjp_0038560		Smp_033590	Sjp_0043170
Smp_021330.2	Sjp_0038550		Smp_033590	Sjp_0043690
Smp_021340.1	Sjp_0133120		Smp_033610	Sjp_0104810
Smp_021370.1	Sjp_0056950		Smp_033620	Sjp_0104800
Smp_021390.1	Sjp_0088280		Smp_033660	Sjp_0064410
Smp_021460.1	Sjp_0104650		Smp_033670	Sjp_0064400
Smp_021540.1	Sjp_0001760		Smp_033680	Sjp_0064380
Smp_021550.1	Sjp_0001750		Smp_033760	Sjp_0051160
Smp_021590.1	Sjp_0001730		Smp_033770	Sjp_0051130
Smp_021600.1	Sjp_0001720		Smp_033870	Sjp_0067070
Smp_021730.2	Sjp_0016130		Smp_033990	Sjp_0060980
Smp_021750.2	Sjp_0050550		Smp_034000	Sjp_0071510
Smp_021760.1	Sjp_0050560		Smp_034080	Sjp_0061020
Smp_021790.2	Sjp_0075300		Smp_034080	Sjp_0061030
Smp_021800.1	Sjp_0075310		Smp_034080	Sjp_0061010
Smp_021830.1	Sjp_0005350		Smp_034090	Sjp_0060990
Smp_021870.1	Sjp_0103700		Smp_034100	Sjp_0061000
Smp_021910.1	Sjp_0105150		Smp_034160	Sjp_0100920
Smp_021920.3	Sjp_0027340		Smp_034270	Sjp_0038730
Smp_021950.1	Sjp_0045640		Smp_034300	Sjp_0110790
Smp_021980.1	Sjp_0045610		Smp_034420	Sjp_0005780
Smp_022020.3	Sjp_0081000		Smp_034430	Sjp_0080840
Smp_022070.1	Sjp_0129590		Smp_034440	Sjp_0080850
Smp_022090.1	Sjp_0047700		Smp_034450	Sjp_0080870
Smp_022110.1	Sjp_0056660		Smp_034500	Sjp_0080910
Smp_022130.1	Sjp_0090630		Smp_034530	Sjp_0059250
Smp_022140.1	Sjp_0090620		Smp_034670	Sjp_0036720
Smp_022150.1	Sjp_0001910		Smp_034680	Sjp_0036730
Smp_022170.1	Sjp_0088790		Smp_034700	Sjp_0094450
Smp_022310.1	Sjp_0011070		Smp_034850	Sjp_0054060
Smp_022320.2	Sjp_0011050		Smp_034940	Sjp_0098230
Smp_022330.1	Sjp_0011040		Smp_034980	Sjp_0016900
Smp_022340.1	Sjp_0106490		Smp_035010	Sjp_0016920
Smp_022400.1	Sjp_0065760		Smp_035020	Sjp_0016930
Smp_022450.2	Sjp_0015240		Smp_035040	Sjp_0016950
Smp_022460.1	Sjp_0015250		Smp_035080	Sjp_0016990
Smp_022470.1	Sjp_0015260		Smp_035090	Sjp_0096150
Smp_022500.1	Sjp_0093860		Smp_035110	Sjp_0017000
Smp_022540.1	Sjp_0093840		Smp_035120	Sjp_0016880
Smp_022560.2	Sjp_0069130		Smp_035140	Sjp_0016870
Smp_022570.1	Sjp_0069120		Smp_035150	Sjp_0016860
Smp_022610.1	Sjp_0073180		Smp_035280	Sjp_0041970
Smp_022630.1	Sjp_0085290		Smp_035300	Sjp_0072540
Smp_022640.1	Sjp_0093550		Smp_035310	Sjp_0072530
Smp_022660.1	Sjp_0073200		Smp_035360	Sjp_0041940
Smp_022700.1	Sjp_0015360		Smp_035360	Sjp_0041930
Smp_022730.1	Sjp_0113070		Smp_035380	Sjp_0034960
Smp_022740.1	Sjp_0015400		Smp_035410	Sjp_0041950
Smp_022760.1	Sjp_0121880		Smp_035460	Sjp_0117330
Smp_022890.1	Sjp_0004750		Smp_035470	Sjp_0040630
Smp_022960.1	Sjp_0011180		Smp_035480	Sjp_0040560
Smp_022990.1	Sjp_0103420		Smp_035500	Sjp_0096750
Smp_023010.1	Sjp_0050240		Smp_035700	Sjp_0056550
Smp_023150.1	Sjp_0028950		Smp_035730	Sjp_0045930
Smp_023160.1	Sjp_0028960		Smp_035790	Sjp_0015000
Smp_023170.1	Sjp_0028970		Smp_035800	Sjp_0014990
Smp_023230.1	Sjp_0085360		Smp_036010	Sjp_0095810
Smp_023240.1	Sjp_0085370		Smp_036010	Sjp_0041510
Smp_023250.2	Sjp_0085380		Smp_036060	Sjp_0007900
Smp_023270.1	Sjp_0085400		Smp_036090	Sjp_0007880
Smp_023290.1	Sjp_0007730		Smp_036130	Sjp_0007930
Smp_023360.2	Sjp_0007710		Smp_036250	Sjp_0025840
Smp_023470.1	Sjp_0007600		Smp_036370	Sjp_0045920
Smp_023530.1	Sjp_0007550		Smp_036390	Sjp_0119030
Smp_023550.1	Sjp_0007530		Smp_036400	Sjp_0060080
Smp_023570.1	Sjp_0007480		Smp_036500	Sjp_0106460
Smp_023620.1	Sjp_0045730		Smp_036570	Sjp_0047930
Smp_023660.1	Sjp_0045690		Smp_036630	Sjp_0047880
Smp_023670.1	Sjp_0045700		Smp_036760	Sjp_0094640
Smp_023700.2	Sjp_0011510		Smp_036780	Sjp_0039040
Smp_023710.1	Sjp_0011530		Smp_036920	Sjp_0035510
Smp_023840.1	Sjp_0099230		Smp_036940	Sjp_0035490
Smp_023940.1	Sjp_0051210		Smp_036950	Sjp_0035480
Smp_023990.1	Sjp_0061960		Smp_036980	Sjp_0035460
Smp_024000.1	Sjp_0062010		Smp_037020	Sjp_0134240
Smp_024010.1	Sjp_0061990		Smp_037200	Sjp_0092900
Smp_024030.1	Sjp_0023780		Smp_037380	Sjp_0045530
Smp_024060.1	Sjp_0089880		Smp_037460	Sjp_0059860
Smp_024070.1	Sjp_0045380		Smp_037530	Sjp_0077020
Smp_024110.1	Sjp_0054230		Smp_037640	Sjp_0063820
Smp_024120.1	Sjp_0054240		Smp_037700	Sjp_0105450
Smp_024140.4	Sjp_0054250		Smp_037900	Sjp_0006630
Smp_024150.1	Sjp_0088050		Smp_037910	Sjp_0107600
Smp_024190.1	Sjp_0082210		Smp_038030	Sjp_0116260
Smp_024240.1	Sjp_0006070		Smp_038080	Sjp_0004060
Smp_024290.1	Sjp_0088830		Smp_038140	Sjp_0003140
Smp_024360.1	Sjp_0103980		Smp_038140	Sjp_0003160
Smp_024370.1	Sjp_0080410		Smp_038210	Sjp_0076250
Smp_024380.1	Sjp_0073590		Smp_038300	Sjp_0009750
Smp_024390.3	Sjp_0073580		Smp_038330	Sjp_0014490
Smp_024450.1	Sjp_0061730		Smp_038410	Sjp_0014570
Smp_024490.1	Sjp_0068400		Smp_038430	Sjp_0014580
Smp_024500.1	Sjp_0085620		Smp_038440	Sjp_0014590
Smp_024520.1	Sjp_0093460		Smp_038540	Sjp_0082860
Smp_024580.2	Sjp_0060870		Smp_038560	Sjp_0063240
Smp_024590.1	Sjp_0060880		Smp_038630	Sjp_0020600
Smp_024660.1	Sjp_0103280		Smp_038640	Sjp_0020590
Smp_024670.1	Sjp_0103290		Smp_038700	Sjp_0020530
Smp_024780.1	Sjp_0016210		Smp_038710	Sjp_0020520
Smp_024800.1	Sjp_0016240		Smp_038730	Sjp_0088690
Smp_024810.1	Sjp_0016250		Smp_038840	Sjp_0026980
Smp_024820.1	Sjp_0110950		Smp_038870	Sjp_0027010
Smp_024850.1	Sjp_0034040		Smp_038940	Sjp_0054450
Smp_024860.1	Sjp_0034030		Smp_038980	Sjp_0077180
Smp_024870.1	Sjp_0034020		Smp_039000	Sjp_0049680
Smp_024880.1	Sjp_0034010		Smp_039080	Sjp_0104600
Smp_024900.1	Sjp_0034000		Smp_039130	Sjp_0102650
Smp_024970.1	Sjp_0021670		Smp_039180	Sjp_0085950
Smp_025010.1	Sjp_0021650		Smp_039390	Sjp_0017440
Smp_025020.1	Sjp_0021690		Smp_039400	Sjp_0017450
Smp_025030.1	Sjp_0021710		Smp_039490	Sjp_0096400
Smp_025100.1	Sjp_0028460		Smp_039590	Sjp_0087610
Smp_025130.1	Sjp_0028480		Smp_039590	Sjp_0036850
Smp_025150.1	Sjp_0028500		Smp_039640	Sjp_0084270
Smp_025160.2	Sjp_0028510		Smp_039650	Sjp_0084280
Smp_025260.1	Sjp_0117790		Smp_039670	Sjp_0005500
Smp_025340.1	Sjp_0013860		Smp_039740	Sjp_0083480
Smp_025360.1	Sjp_0013840		Smp_039810	Sjp_0084390
Smp_025380.1	Sjp_0087380		Smp_039870	Sjp_0081170
Smp_025410.1	Sjp_0013820		Smp_039970	Sjp_0115010
Smp_025440.1	Sjp_0076440		Smp_039980	Sjp_0102210
Smp_025510.1	Sjp_0114910		Smp_040020	Sjp_0001170
Smp_025550.1	Sjp_0112410		Smp_040080	Sjp_0001120
Smp_025560.1	Sjp_0107350		Smp_040100	Sjp_0001070
Smp_025570.1	Sjp_0098940		Smp_040110	Sjp_0001060
Smp_025620.1	Sjp_0077700		Smp_040190	Sjp_0003620
Smp_025670.1	Sjp_0077630		Smp_040280	Sjp_0037800
Smp_025700.1	Sjp_0077620		Smp_040350	Sjp_0019100
Smp_025740.1	Sjp_0077600		Smp_040360	Sjp_0019110
Smp_025750.1	Sjp_0007820		Smp_040440	Sjp_0019190
Smp_025800.1	Sjp_0090370		Smp_040450	Sjp_0051910
Smp_025860.1	Sjp_0091280		Smp_040500	Sjp_0051840
Smp_025890.1	Sjp_0072810		Smp_040560	Sjp_0035810
Smp_025950.1	Sjp_0094070		Smp_040710	Sjp_0043430
Smp_026030.1	Sjp_0079550		Smp_040720	Sjp_0049260
Smp_026040.1	Sjp_0113840		Smp_040800	Sjp_0124460
Smp_026090.1	Sjp_0050910		Smp_040970	Sjp_0091260
Smp_026160.1	Sjp_0081530		Smp_040990	Sjp_0019230
Smp_026230.1	Sjp_0029800		Smp_041050	Sjp_0019290
Smp_026250.3	Sjp_0029820		Smp_041100	Sjp_0019360
Smp_026270.1	Sjp_0029840		Smp_041190	Sjp_0027240
Smp_026280.1	Sjp_0029850		Smp_041350	Sjp_0112810
Smp_026300.1	Sjp_0029870		Smp_041370	Sjp_0043120
Smp_026310.1	Sjp_0029890		Smp_041480	Sjp_0038600
Smp_026320.1	Sjp_0029900		Smp_041490	Sjp_0066530
Smp_026340.1	Sjp_0029910		Smp_041500	Sjp_0066540
Smp_026390.1	Sjp_0029940		Smp_041520	Sjp_0116800
Smp_026400.1	Sjp_0022070		Smp_041570	Sjp_0013150
Smp_026420.1	Sjp_0027380		Smp_041650	Sjp_0013100
Smp_026440.1	Sjp_0022050		Smp_041700	Sjp_0057450
Smp_026540.1	Sjp_0041730		Smp_041730	Sjp_0000690
Smp_026560.2	Sjp_0063680		Smp_041770	Sjp_0000700
Smp_026570.1	Sjp_0114320		Smp_041830	Sjp_0000800
Smp_026630.1	Sjp_0117270		Smp_041890	Sjp_0000830
Smp_026670.1	Sjp_0069080		Smp_041960	Sjp_0000870
Smp_026700.1	Sjp_0062930		Smp_041980	Sjp_0000880
Smp_026770.1	Sjp_0041210		Smp_042030	Sjp_0000940
Smp_026820.1	Sjp_0073550		Smp_042050	Sjp_0000960
Smp_026830.1	Sjp_0073540		Smp_042090	Sjp_0102800
Smp_026910.1	Sjp_0085940		Smp_042110	Sjp_0102780
Smp_026930.1	Sjp_0048170		Smp_042160	Sjp_0031630
Smp_027000.1	Sjp_0116590		Smp_042210	Sjp_0088650
Smp_027010.2	Sjp_0049390		Smp_042230	Sjp_0003500
Smp_027040.1	Sjp_0116900		Smp_042280	Sjp_0003440
Smp_027080.1	Sjp_0049330		Smp_042340	Sjp_0003360
Smp_027210.1	Sjp_0003980		Smp_042390	Sjp_0003310
Smp_027220.1	Sjp_0003970		Smp_042400	Sjp_0061480
Smp_027240.1	Sjp_0015030		Smp_042420	Sjp_0061510
Smp_027250.1	Sjp_0015040		Smp_042430	Sjp_0061520
Smp_027300.1	Sjp_0015100		Smp_042530	Sjp_0016340
Smp_027340.1	Sjp_0015170		Smp_042550	Sjp_0016370
Smp_027370.1	Sjp_0015190		Smp_042560	Sjp_0016380
Smp_027390.1	Sjp_0015220		Smp_042590	Sjp_0063950
Smp_027400.1	Sjp_0015230		Smp_042650	Sjp_0100440
Smp_027430.1	Sjp_0055500		Smp_042680	Sjp_0058160
Smp_027450.1	Sjp_0064970		Smp_042690	Sjp_0058150
Smp_027480.1	Sjp_0055480		Smp_042740	Sjp_0114990
Smp_027500.1	Sjp_0073300		Smp_042790	Sjp_0062550
Smp_027550.1	Sjp_0039960		Smp_042910	Sjp_0040920
Smp_027610.1	Sjp_0039930		Smp_042920	Sjp_0040930
Smp_027850.1	Sjp_0002000		Smp_042980	Sjp_0034900
Smp_027870.1	Sjp_0002010		Smp_042990	Sjp_0034890
Smp_027880.1	Sjp_0002020		Smp_043010	Sjp_0114770
Smp_027890.1	Sjp_0085990		Smp_043030	Sjp_0034910
Smp_027910.1	Sjp_0091990		Smp_043030	Sjp_0124190
Smp_027920.1	Sjp_0091980		Smp_043070	Sjp_0086600
Smp_027970.1	Sjp_0057890		Smp_043130	Sjp_0061590
Smp_027990.1	Sjp_0057900		Smp_043170	Sjp_0013890
Smp_028030.1	Sjp_0029400		Smp_043200	Sjp_0013910
Smp_028050.1	Sjp_0029390		Smp_043210	Sjp_0013920
Smp_028060.1	Sjp_0029380		Smp_043220	Sjp_0013940
Smp_028070.2	Sjp_0029370		Smp_043350	Sjp_0039630
Smp_028080.1	Sjp_0029360		Smp_043360	Sjp_0039640
Smp_028100.1	Sjp_0029340		Smp_043390	Sjp_0111210
Smp_028120.1	Sjp_0029320		Smp_043430	Sjp_0087550
Smp_028130.1	Sjp_0029330		Smp_043600	Sjp_0047410
Smp_028140.1	Sjp_0069410		Smp_043610	Sjp_0065150
Smp_028170.1	Sjp_0025180		Smp_043650	Sjp_0065180
Smp_028200.1	Sjp_0009420		Smp_043670	Sjp_0065200
Smp_028210.1	Sjp_0009410		Smp_043820	Sjp_0112360
Smp_028330.1	Sjp_0009350		Smp_043860	Sjp_0087220
Smp_028340.1	Sjp_0009340		Smp_043930	Sjp_0014920
Smp_028360.1	Sjp_0009290		Smp_043940	Sjp_0014900
Smp_028370.1	Sjp_0009280		Smp_043970	Sjp_0014880
Smp_028410.1	Sjp_0009200		Smp_044250	Sjp_0090150
Smp_028440.1	Sjp_0009180		Smp_044260	Sjp_0084550
Smp_028490.1	Sjp_0118370		Smp_044280	Sjp_0009930
Smp_028550.1	Sjp_0009130		Smp_044400	Sjp_0056360
Smp_028650.1	Sjp_0009090		Smp_044440	Sjp_0101110
Smp_028670.2	Sjp_0009070		Smp_044470	Sjp_0074230
Smp_028730.1	Sjp_0006520		Smp_044580	Sjp_0066600
Smp_028800.1	Sjp_0033870		Smp_044580	Sjp_0132810
Smp_028930.1	Sjp_0069210		Smp_044680	Sjp_0099500
Smp_028940.1	Sjp_0098960		Smp_044770	Sjp_0005260
Smp_028980.1	Sjp_0033590		Smp_044800	Sjp_0005220
Smp_028990.1	Sjp_0033580		Smp_044810	Sjp_0019740
Smp_029060.1	Sjp_0033520		Smp_044820	Sjp_0019750
Smp_029100.1	Sjp_0067570		Smp_044850	Sjp_0048490
Smp_029150.1	Sjp_0040280		Smp_044950	Sjp_0082890
Smp_029160.1	Sjp_0040270		Smp_044970	Sjp_0073030
Smp_029210.1	Sjp_0040220		Smp_045070	Sjp_0064900
Smp_029240.1	Sjp_0118900		Smp_045230	Sjp_0083890
Smp_029240.2	Sjp_0040190		Smp_045250	Sjp_0050590
Smp_029310.1	Sjp_0043510		Smp_045300	Sjp_0040430
Smp_029360.1	Sjp_0070770		Smp_045310	Sjp_0040450
Smp_029370.1	Sjp_0057060		Smp_045330	Sjp_0099900
Smp_029390.1	Sjp_0031510		Smp_045360	Sjp_0055460
Smp_029480.1	Sjp_0015830		Smp_045430	Sjp_0094960
Smp_029500.1	Sjp_0015820		Smp_045480	Sjp_0018410
Smp_029620.1	Sjp_0027110		Smp_045510	Sjp_0065660
Smp_029670.1	Sjp_0012020		Smp_045590	Sjp_0034340
Smp_029700.1	Sjp_0011960		Smp_045600	Sjp_0034350
Smp_029730.1	Sjp_0011990		Smp_045610	Sjp_0034360
Smp_029740.1	Sjp_0011940		Smp_045620	Sjp_0047510
Smp_029790.1	Sjp_0106920		Smp_045650	Sjp_0047480
Smp_029800.1	Sjp_0018000		Smp_045710	Sjp_0107190
Smp_029820.1	Sjp_0100910		Smp_045730	Sjp_0094980
Smp_029850.1	Sjp_0017980		Smp_045750	Sjp_0086500
Smp_029890.1	Sjp_0017940		Smp_045760	Sjp_0086490
Smp_029900.1	Sjp_0017950		Smp_045780	Sjp_0096390
Smp_029930.1	Sjp_0098170		Smp_045790	Sjp_0096380
Smp_029940.1	Sjp_0097040		Smp_045810	Sjp_0075570
Smp_029970.1	Sjp_0078460		Smp_045920	Sjp_0103790
Smp_029990.1	Sjp_0025500		Smp_045940	Sjp_0100290
Smp_030000.1	Sjp_0025490		Smp_045990	Sjp_0082840
Smp_030010.2	Sjp_0025480		Smp_046100	Sjp_0035700
Smp_030020.1	Sjp_0025470		Smp_046130	Sjp_0035670
Smp_030030.1	Sjp_0025460		Smp_046140	Sjp_0035680
Smp_030110.1	Sjp_0025390		Smp_046160	Sjp_0035690
Smp_030150.1	Sjp_0025370		Smp_046190	Sjp_0050360
Smp_030180.1	Sjp_0070060		Smp_046280	Sjp_0097300
Smp_030220.1	Sjp_0070070		Smp_046450	Sjp_0074280
Smp_030250.1	Sjp_0096630		Smp_046500	Sjp_0075590
Smp_030280.1	Sjp_0012110		Smp_046550	Sjp_0042600
Smp_030290.1	Sjp_0012120		Smp_046650	Sjp_0022730
Smp_030300.3	Sjp_0012140		Smp_046680	Sjp_0022740
Smp_030300.4	Sjp_0012130		Smp_046800	Sjp_0041830
Smp_030320.1	Sjp_0012150		Smp_046870	Sjp_0052180
Smp_030330.2	Sjp_0012160		Smp_046880	Sjp_0052190
Smp_030350.1	Sjp_0012180		Smp_046890	Sjp_0085700
Smp_030370.1	Sjp_0056680		Smp_046900	Sjp_0094170
Smp_030400.1	Sjp_0056650		Smp_046910	Sjp_0094180
Smp_030440.1	Sjp_0056610		Smp_046980	Sjp_0079920
Smp_030500.1	Sjp_0005480		Smp_047090	Sjp_0114500
Smp_030650.1	Sjp_0026160		Smp_047100	Sjp_0081960
Smp_030690.1	Sjp_0022080		Smp_047200	Sjp_0075700
Smp_030710.1	Sjp_0055890		Smp_047370	Sjp_0024400
Smp_030730.1	Sjp_0060500		Smp_047400	Sjp_0024430
Smp_030760.1	Sjp_0040140		Smp_047440	Sjp_0024460
Smp_030780.1	Sjp_0112450		Smp_047460	Sjp_0029490
Smp_030830.2	Sjp_0036890		Smp_047500	Sjp_0029470
Smp_030860.1	Sjp_0036920		Smp_047700	Sjp_0024510
Smp_030870.1	Sjp_0036930		Smp_047720	Sjp_0031450
Smp_030910.1	Sjp_0080450		Smp_047740	Sjp_0024600
Smp_030920.1	Sjp_0106930		Smp_047870	Sjp_0049810
Smp_030930.2	Sjp_0054660		Smp_048040	Sjp_0042450
Smp_031000.2	Sjp_0077810		Smp_048080	Sjp_0021200
Smp_031010.1	Sjp_0077800		Smp_048160	Sjp_0020860
Smp_031020.1	Sjp_0077790		Smp_048230	Sjp_0020970
Smp_031040.2	Sjp_0069070		Smp_048230	Sjp_0020960
Smp_031050.1	Sjp_0085020		Smp_048270	Sjp_0021010
Smp_031070.3	Sjp_0085030		Smp_048310	Sjp_0021060
Smp_031100.1	Sjp_0029170		Smp_048310	Sjp_0021050
Smp_031180.1	Sjp_0029100		Smp_048420	Sjp_0021170
Smp_031190.1	Sjp_0029090		Smp_048520	Sjp_0052490
Smp_031220.1	Sjp_0029070		Smp_048540	Sjp_0060110
Smp_031270.1	Sjp_0049770		Smp_048550	Sjp_0060120
Smp_031310.1	Sjp_0049740		Smp_048620	Sjp_0087950
Smp_031360.1	Sjp_0049720		Smp_048650	Sjp_0114570
Smp_031530.1	Sjp_0014380		Smp_048690	Sjp_0027890
Smp_031560.1	Sjp_0014360		Smp_048870	Sjp_0070810
Smp_031570.1	Sjp_0014350		Smp_048940	Sjp_0082090
Smp_031590.1	Sjp_0014330		Smp_048970	Sjp_0075070
Smp_031680.1	Sjp_0002740		Smp_048980	Sjp_0092040
Smp_031690.1	Sjp_0069050		Smp_048990	Sjp_0112790
Smp_031710.1	Sjp_0058220		Smp_049000	Sjp_0077380
Smp_031720.1	Sjp_0058210		Smp_049330	Sjp_0021290
Smp_031730.1	Sjp_0058200		Smp_049610	Sjp_0040690
Smp_031770.9	Sjp_0080050		Smp_049680	Sjp_0010520
Smp_031860.1	Sjp_0054900		Smp_049740	Sjp_0080490
Smp_031880.1	Sjp_0054870		Smp_049880	Sjp_0100280
Smp_031920.4	Sjp_0103100		Smp_049890	Sjp_0100270
Smp_031940.1	Sjp_0103080		Smp_049920	Sjp_0012810
Smp_031950.2	Sjp_0092860		Smp_049930	Sjp_0012800
Smp_031990.1	Sjp_0031480		Smp_049970	Sjp_0099260
Smp_032000.1	Sjp_0071380		Smp_049990	Sjp_0035550
Smp_032060.1	Sjp_0071370		Smp_050110	Sjp_0114800
Smp_032120.1	Sjp_0027520		Smp_050130	Sjp_0045030
Smp_032150.1	Sjp_0027500		Smp_050160	Sjp_0045050
Smp_032180.1	Sjp_0133700		Smp_050220	Sjp_0045140
Smp_032230.1	Sjp_0027450		Smp_050250	Sjp_0035620
Smp_032240.1	Sjp_0027420		Smp_050280	Sjp_0091020
Smp_032250.1	Sjp_0027430		Smp_050350	Sjp_0018680
Smp_032260.1	Sjp_0027400		Smp_050360	Sjp_0018690
Smp_032280.1	Sjp_0090930		Smp_050380	Sjp_0018650
Smp_032310.1	Sjp_0003110		Smp_050430	Sjp_0041440
Smp_032320.6	Sjp_0003120		Smp_050470	Sjp_0046360
Smp_032420.1	Sjp_0096100		Smp_050540	Sjp_0090850
Smp_032480.1	Sjp_0051510		Smp_050570	Sjp_0039950
Smp_032490.1	Sjp_0051520		Smp_050630	Sjp_0035140
Smp_032500.1	Sjp_0112300		Smp_050640	Sjp_0085260
Smp_032510.1	Sjp_0051530		Smp_050700	Sjp_0115510
Smp_032520.1	Sjp_0051560		Smp_050730	Sjp_0115120
Smp_032640.1	Sjp_0020260		Smp_050740	Sjp_0083000
Smp_032740.1	Sjp_0095470		Smp_050880	Sjp_0018190
Smp_032750.1	Sjp_0059690		Smp_050940	Sjp_0018120
Smp_032760.1	Sjp_0059680		Smp_051000	Sjp_0018080
Smp_032770.1	Sjp_0059670		Smp_051060	Sjp_0026720
Smp_032780.1	Sjp_0059720		Smp_051070	Sjp_0018100
Smp_032790.1	Sjp_0059660		Smp_051080	Sjp_0026700
Smp_032810.1	Sjp_0008250		Smp_051220	Sjp_0070970
Smp_032820.1	Sjp_0059650		Smp_051260	Sjp_0006150
Smp_032920.2	Sjp_0083740		Smp_051280	Sjp_0006170
Smp_032930.1	Sjp_0118330		Smp_051360	Sjp_0056980
Smp_032950.1	Sjp_0102250		Smp_051400	Sjp_0057280
Smp_032970.1	Sjp_0130580		Smp_051510	Sjp_0027720
Smp_033000.1	Sjp_0114010		Smp_051550	Sjp_0068470
Smp_033010.1	Sjp_0115600		Smp_051760	Sjp_0073230
Smp_033020.1	Sjp_0115610		Smp_052060	Sjp_0022280
Smp_033050.2	Sjp_0092890		Smp_052060	Sjp_0105240
Smp_033150.1	Sjp_0027570		Smp_052150	Sjp_0022360
Smp_033200.1	Sjp_0014210		Smp_052160	Sjp_0022370
Smp_033250.1	Sjp_0033720		Smp_052230	Sjp_0090430
Smp_033260.2	Sjp_0033730		Smp_052290	Sjp_0089370
Smp_033330.1	Sjp_0033350		Smp_052330	Sjp_0026530
Smp_033350.1	Sjp_0033370		Smp_052350	Sjp_0026540
Smp_033400.1	Sjp_0038590		Smp_052500	Sjp_0020640
Smp_033540.1	Sjp_0075840		Smp_052640	Sjp_0038800
Smp_033550.1	Sjp_0134340		Smp_052710	Sjp_0131840
Smp_033590.1	Sjp_0043170		Smp_052730	Sjp_0025690
Smp_033600.1	Sjp_0043700		Smp_052740	Sjp_0025720
Smp_033610.1	Sjp_0104810		Smp_052760	Sjp_0025700
Smp_033620.1	Sjp_0104800		Smp_052780	Sjp_0026110
Smp_033660.1	Sjp_0064410		Smp_052790	Sjp_0026100
Smp_033670.5	Sjp_0064400		Smp_052810	Sjp_0026090
Smp_033680.1	Sjp_0064380		Smp_052870	Sjp_0042970
Smp_033700.1	Sjp_0013350		Smp_052880	Sjp_0097680
Smp_033710.1	Sjp_0113730		Smp_052890	Sjp_0047760
Smp_033760.2	Sjp_0051160		Smp_052910	Sjp_0047790
Smp_033770.1	Sjp_0051130		Smp_053020	Sjp_0082350
Smp_033870.1	Sjp_0067070		Smp_053030	Sjp_0082340
Smp_033930.1	Sjp_0091400		Smp_053060	Sjp_0076610
Smp_033950.2	Sjp_0030450		Smp_053120	Sjp_0074080
Smp_033970.1	Sjp_0064190		Smp_053130	Sjp_0074090
Smp_033990.1	Sjp_0060980		Smp_053160	Sjp_0074120
Smp_034000.1	Sjp_0071510		Smp_053190	Sjp_0129560
Smp_034010.1	Sjp_0101650		Smp_053230	Sjp_0084100
Smp_034020.1	Sjp_0115980		Smp_053520	Sjp_0051970
Smp_034080.1	Sjp_0061020		Smp_053550	Sjp_0052010
Smp_034090.1	Sjp_0060990		Smp_053610	Sjp_0052070
Smp_034100.1	Sjp_0061000		Smp_053640	Sjp_0052100
Smp_034120.1	Sjp_0087750		Smp_053640	Sjp_0132030
Smp_034160.1	Sjp_0100920		Smp_053700	Sjp_0134820
Smp_034190.1	Sjp_0055030		Smp_053800	Sjp_0053830
Smp_034220.1	Sjp_0086320		Smp_053820	Sjp_0019480
Smp_034270.1	Sjp_0038730		Smp_053830	Sjp_0019470
Smp_034300.1	Sjp_0110790		Smp_053990	Sjp_0113670
Smp_034400.1	Sjp_0005740		Smp_054120	Sjp_0061080
Smp_034410.3	Sjp_0107700		Smp_054160	Sjp_0063550
Smp_034430.1	Sjp_0080840		Smp_054170	Sjp_0073820
Smp_034440.1	Sjp_0080850		Smp_054200	Sjp_0063520
Smp_034450.1	Sjp_0080870		Smp_054230	Sjp_0075150
Smp_034490.1	Sjp_0080900		Smp_054240	Sjp_0075160
Smp_034500.1	Sjp_0080910		Smp_054310	Sjp_0070220
Smp_034530.1	Sjp_0059250		Smp_054320	Sjp_0070240
Smp_034550.1	Sjp_0059270		Smp_054450	Sjp_0083550
Smp_034610.1	Sjp_0111510		Smp_054540	Sjp_0085580
Smp_034660.1	Sjp_0108730		Smp_054560	Sjp_0085560
Smp_034670.1	Sjp_0036720		Smp_054600	Sjp_0102720
Smp_034680.1	Sjp_0036730		Smp_054610	Sjp_0105730
Smp_034700.1	Sjp_0094450		Smp_054620	Sjp_0073790
Smp_034840.3	Sjp_0092590		Smp_054770	Sjp_0048220
Smp_034850.1	Sjp_0054060		Smp_054780	Sjp_0101740
Smp_034860.1	Sjp_0102460		Smp_054790	Sjp_0081720
Smp_034870.1	Sjp_0061190		Smp_054800	Sjp_0061800
Smp_034940.1	Sjp_0073440		Smp_054810	Sjp_0048180
Smp_034980.1	Sjp_0016900		Smp_054820	Sjp_0048210
Smp_035010.1	Sjp_0016920		Smp_055050	Sjp_0070710
Smp_035020.2	Sjp_0016930		Smp_055090	Sjp_0075430
Smp_035030.1	Sjp_0016940		Smp_055130	Sjp_0089630
Smp_035040.1	Sjp_0016950		Smp_055140	Sjp_0089640
Smp_035080.1	Sjp_0016990		Smp_055200	Sjp_0089680
Smp_035090.1	Sjp_0096150		Smp_055210	Sjp_0061600
Smp_035110.1	Sjp_0017000		Smp_055220	Sjp_0061610
Smp_035120.1	Sjp_0016880		Smp_055310	Sjp_0018990
Smp_035140.1	Sjp_0016870		Smp_055420	Sjp_0059490
Smp_035150.1	Sjp_0016860		Smp_055440	Sjp_0038340
Smp_035160.1	Sjp_0016850		Smp_055450	Sjp_0038330
Smp_035190.2	Sjp_0016840		Smp_055500	Sjp_0081820
Smp_035200.4	Sjp_0016830		Smp_055720	Sjp_0075420
Smp_035210.1	Sjp_0016810		Smp_055740	Sjp_0131790
Smp_035220.1	Sjp_0101850		Smp_055800	Sjp_0112740
Smp_035260.1	Sjp_0041980		Smp_055870	Sjp_0071080
Smp_035270.2	Sjp_0041910		Smp_055890	Sjp_0071060
Smp_035280.1	Sjp_0041970		Smp_055900	Sjp_0071050
Smp_035300.2	Sjp_0072540		Smp_055990	Sjp_0015930
Smp_035310.1	Sjp_0072520		Smp_056240	Sjp_0040500
Smp_035360.1	Sjp_0041940		Smp_056280	Sjp_0045350
Smp_035380.1	Sjp_0034960		Smp_056280	Sjp_0098300
Smp_035390.1	Sjp_0034980		Smp_056350	Sjp_0012600
Smp_035410.1	Sjp_0041950		Smp_056390	Sjp_0012670
Smp_035430.1	Sjp_0094500		Smp_056440	Sjp_0077340
Smp_035460.1	Sjp_0117330		Smp_056500	Sjp_0068310
Smp_035470.1	Sjp_0040630		Smp_056640	Sjp_0003750
Smp_035480.1	Sjp_0040560		Smp_056700	Sjp_0042090
Smp_035500.1	Sjp_0096750		Smp_056780	Sjp_0076890
Smp_035550.1	Sjp_0105400		Smp_056850	Sjp_0028110
Smp_035560.2	Sjp_0126470		Smp_056860	Sjp_0028120
Smp_035580.1	Sjp_0070610		Smp_056900	Sjp_0028190
Smp_035620.1	Sjp_0081030		Smp_056930	Sjp_0104200
Smp_035640.1	Sjp_0056470		Smp_056970	Sjp_0025800
Smp_035650.1	Sjp_0056480		Smp_057060	Sjp_0083610
Smp_035700.1	Sjp_0056550		Smp_057120	Sjp_0053590
Smp_035730.1	Sjp_0045930		Smp_057140	Sjp_0053600
Smp_035790.1	Sjp_0015000		Smp_057210	Sjp_0075800
Smp_035800.1	Sjp_0014990		Smp_057230	Sjp_0075820
Smp_035870.1	Sjp_0009380		Smp_057430	Sjp_0058570
Smp_036010.1	Sjp_0007840		Smp_057600	Sjp_0047870
Smp_036020.1	Sjp_0007850		Smp_057650	Sjp_0093350
Smp_036060.1	Sjp_0007900		Smp_057710	Sjp_0021580
Smp_036090.1	Sjp_0007880		Smp_057790	Sjp_0010990
Smp_036130.1	Sjp_0007930		Smp_057860	Sjp_0010900
Smp_036180.1	Sjp_0006700		Smp_057930	Sjp_0012050
Smp_036220.1	Sjp_0006730		Smp_058050	Sjp_0029590
Smp_036250.1	Sjp_0025840		Smp_058140	Sjp_0054860
Smp_036270.10	Sjp_0074360		Smp_058150	Sjp_0054850
Smp_036370.1	Sjp_0045920		Smp_058160	Sjp_0054840
Smp_036390.1	Sjp_0060070		Smp_058190	Sjp_0010030
Smp_036400.1	Sjp_0060080		Smp_058270	Sjp_0074550
Smp_036470.1	Sjp_0061110		Smp_058320	Sjp_0039330
Smp_036500.1	Sjp_0106460		Smp_058350	Sjp_0033620
Smp_036550.1	Sjp_0108850		Smp_058400	Sjp_0033660
Smp_036570.1	Sjp_0047930		Smp_058410	Sjp_0033670
Smp_036590.1	Sjp_0047920		Smp_058460	Sjp_0104580
Smp_036630.1	Sjp_0047900		Smp_058650	Sjp_0078790
Smp_036720.1	Sjp_0094140		Smp_058660	Sjp_0119510
Smp_036760.1	Sjp_0094640		Smp_058660	Sjp_0092200
Smp_036780.1	Sjp_0039040		Smp_058670	Sjp_0092190
Smp_036920.1	Sjp_0035510		Smp_058670	Sjp_0098220
Smp_036930.1	Sjp_0035500		Smp_058680	Sjp_0118310
Smp_036940.1	Sjp_0035490		Smp_058730	Sjp_0092170
Smp_036950.1	Sjp_0035480		Smp_058850	Sjp_0003280
Smp_036980.1	Sjp_0035460		Smp_058880	Sjp_0102470
Smp_036990.1	Sjp_0035450		Smp_058990	Sjp_0040100
Smp_037020.1	Sjp_0134240		Smp_059080	Sjp_0052920
Smp_037190.1	Sjp_0102640		Smp_059090	Sjp_0003270
Smp_037200.1	Sjp_0092900		Smp_059150	Sjp_0133370
Smp_037230.1	Sjp_0015460		Smp_059170	Sjp_0115690
Smp_037380.1	Sjp_0045530		Smp_059200	Sjp_0071000
Smp_037400.1	Sjp_0045520		Smp_059210	Sjp_0070990
Smp_037460.2	Sjp_0059860		Smp_059240	Sjp_0118350
Smp_037510.1	Sjp_0077000		Smp_059290	Sjp_0088900
Smp_037530.1	Sjp_0077020		Smp_059360	Sjp_0093140
Smp_037540.2	Sjp_0077040		Smp_059570	Sjp_0067940
Smp_037590.1	Sjp_0082920		Smp_059660	Sjp_0009010
Smp_037610.1	Sjp_0082900		Smp_059670	Sjp_0008950
Smp_037640.1	Sjp_0058100		Smp_059680	Sjp_0008940
Smp_037700.1	Sjp_0105450		Smp_059690	Sjp_0118930
Smp_037720.1	Sjp_0108330		Smp_059780	Sjp_0049990
Smp_037900.1	Sjp_0006630		Smp_059780	Sjp_0049980
Smp_037910.1	Sjp_0107600		Smp_059790	Sjp_0064680
Smp_037930.1	Sjp_0094590		Smp_059800	Sjp_0071520
Smp_038030.1	Sjp_0116260		Smp_059810	Sjp_0083200
Smp_038080.1	Sjp_0004060		Smp_059870	Sjp_0056920
Smp_038100.1	Sjp_0059730		Smp_059880	Sjp_0056930
Smp_038140.1	Sjp_0003140		Smp_059930	Sjp_0057180
Smp_038210.1	Sjp_0076250		Smp_059980	Sjp_0083870
Smp_038240.1	Sjp_0075600		Smp_060080	Sjp_0040740
Smp_038300.1	Sjp_0009750		Smp_060090	Sjp_0040720
Smp_038330.1	Sjp_0014490		Smp_060160	Sjp_0062730
Smp_038340.1	Sjp_0014500		Smp_060180	Sjp_0062760
Smp_038410.1	Sjp_0014570		Smp_060190	Sjp_0116380
Smp_038430.1	Sjp_0014580		Smp_060290	Sjp_0082620
Smp_038440.1	Sjp_0014590		Smp_060570	Sjp_0087700
Smp_038510.1	Sjp_0078050		Smp_060660	Sjp_0089580
Smp_038530.1	Sjp_0104300		Smp_060750	Sjp_0058060
Smp_038540.1	Sjp_0082860		Smp_060860	Sjp_0105140
Smp_038560.4	Sjp_0063240		Smp_060900	Sjp_0081230
Smp_038630.1	Sjp_0020600		Smp_060940	Sjp_0005210
Smp_038640.1	Sjp_0020590		Smp_060950	Sjp_0005200
Smp_038680.1	Sjp_0020550		Smp_061040	Sjp_0103960
Smp_038700.5	Sjp_0020530		Smp_061050	Sjp_0056820
Smp_038710.1	Sjp_0020520		Smp_061100	Sjp_0066680
Smp_038730.5	Sjp_0088690		Smp_061210	Sjp_0002250
Smp_038820.1	Sjp_0026940		Smp_061230	Sjp_0106290
Smp_038830.1	Sjp_0026950		Smp_061300	Sjp_0002310
Smp_038840.1	Sjp_0026980		Smp_061310	Sjp_0002320
Smp_038870.1	Sjp_0027010		Smp_061400	Sjp_0037480
Smp_038940.1	Sjp_0054450		Smp_061540	Sjp_0008470
Smp_038950.1	Sjp_0110090		Smp_061560	Sjp_0075400
Smp_038970.1	Sjp_0077170		Smp_061570	Sjp_0008480
Smp_038980.1	Sjp_0077180		Smp_061580	Sjp_0010680
Smp_039000.1	Sjp_0049680		Smp_061590	Sjp_0010660
Smp_039010.1	Sjp_0045120		Smp_061650	Sjp_0096060
Smp_039080.1	Sjp_0104600		Smp_061840	Sjp_0094300
Smp_039130.1	Sjp_0102650		Smp_061870	Sjp_0105460
Smp_039180.1	Sjp_0085950		Smp_061920	Sjp_0052700
Smp_039300.1	Sjp_0017390		Smp_061920	Sjp_0118730
Smp_039390.1	Sjp_0017440		Smp_062070	Sjp_0085860
Smp_039400.1	Sjp_0017450		Smp_062270	Sjp_0059840
Smp_039470.1	Sjp_0079530		Smp_062490	Sjp_0012360
Smp_039490.1	Sjp_0096400		Smp_062510	Sjp_0012320
Smp_039490.2	Sjp_0089810		Smp_062520	Sjp_0123290
Smp_039590.1	Sjp_0087610		Smp_062530	Sjp_0003700
Smp_039600.1	Sjp_0087600		Smp_062550	Sjp_0003710
Smp_039640.2	Sjp_0084270		Smp_062560	Sjp_0003720
Smp_039650.1	Sjp_0084280		Smp_062630	Sjp_0062880
Smp_039670.1	Sjp_0005500		Smp_062680	Sjp_0037880
Smp_039740.1	Sjp_0083480		Smp_062720	Sjp_0037930
Smp_039750.1	Sjp_0083470		Smp_062760	Sjp_0104130
Smp_039810.1	Sjp_0084390		Smp_062790	Sjp_0030640
Smp_039820.1	Sjp_0114060		Smp_062920	Sjp_0014810
Smp_039870.2	Sjp_0081170		Smp_062970	Sjp_0073520
Smp_039970.1	Sjp_0115010		Smp_063040	Sjp_0092370
Smp_039980.1	Sjp_0102210		Smp_063090	Sjp_0067360
Smp_040020.1	Sjp_0001170		Smp_063110	Sjp_0060630
Smp_040080.1	Sjp_0001120		Smp_063120	Sjp_0060620
Smp_040100.1	Sjp_0001070		Smp_063180	Sjp_0050860
Smp_040110.1	Sjp_0001060		Smp_063260	Sjp_0002930
Smp_040130.1	Sjp_0001030		Smp_063300	Sjp_0011410
Smp_040270.1	Sjp_0037810		Smp_063330	Sjp_0011440
Smp_040280.1	Sjp_0037800		Smp_063350	Sjp_0011460
Smp_040350.1	Sjp_0019100		Smp_063390	Sjp_0011480
Smp_040360.1	Sjp_0019110		Smp_063480	Sjp_0057960
Smp_040390.1	Sjp_0019150		Smp_063520	Sjp_0073130
Smp_040440.1	Sjp_0019190		Smp_063540	Sjp_0039740
Smp_040450.1	Sjp_0051910		Smp_063560	Sjp_0039750
Smp_040460.1	Sjp_0086280		Smp_063630	Sjp_0121270
Smp_040500.1	Sjp_0051840		Smp_063650	Sjp_0064540
Smp_040510.1	Sjp_0092620		Smp_063680	Sjp_0016610
Smp_040550.1	Sjp_0035790		Smp_063760	Sjp_0042870
Smp_040560.1	Sjp_0035810		Smp_063830	Sjp_0049430
Smp_040570.1	Sjp_0035820		Smp_064020	Sjp_0064360
Smp_040680.1	Sjp_0035870		Smp_064030	Sjp_0013380
Smp_040710.1	Sjp_0043430		Smp_064200	Sjp_0133530
Smp_040720.3	Sjp_0049260		Smp_064250	Sjp_0000250
Smp_040770.1	Sjp_0105270		Smp_064260	Sjp_0112520
Smp_040790.1	Sjp_0039440		Smp_064280	Sjp_0045770
Smp_040800.1	Sjp_0039430		Smp_064320	Sjp_0036030
Smp_040960.1	Sjp_0087880		Smp_064330	Sjp_0036020
Smp_040970.1	Sjp_0091260		Smp_064360	Sjp_0035990
Smp_040990.1	Sjp_0019230		Smp_064390	Sjp_0035960
Smp_041050.1	Sjp_0019290		Smp_064400	Sjp_0035950
Smp_041060.1	Sjp_0019300		Smp_064430	Sjp_0035930
Smp_041100.1	Sjp_0019360		Smp_064500	Sjp_0062460
Smp_041190.1	Sjp_0040850		Smp_064510	Sjp_0006190
Smp_041280.1	Sjp_0113310		Smp_064520	Sjp_0056010
Smp_041350.1	Sjp_0112810		Smp_064530	Sjp_0056020
Smp_041370.1	Sjp_0043120		Smp_064590	Sjp_0034270
Smp_041430.1	Sjp_0053680		Smp_064590	Sjp_0034280
Smp_041450.1	Sjp_0053670		Smp_064600	Sjp_0034260
Smp_041460.1	Sjp_0053660		Smp_064640	Sjp_0034210
Smp_041480.2	Sjp_0038600		Smp_064650	Sjp_0078140
Smp_041490.1	Sjp_0066530		Smp_064750	Sjp_0079760
Smp_041500.1	Sjp_0066540		Smp_064800	Sjp_0044880
Smp_041570.1	Sjp_0013150		Smp_064830	Sjp_0058940
Smp_041600.1	Sjp_0013140		Smp_064830	Sjp_0115250
Smp_041630.1	Sjp_0013130		Smp_064900	Sjp_0028540
Smp_041650.1	Sjp_0013100		Smp_065000	Sjp_0017670
Smp_041700.1	Sjp_0057450		Smp_065060	Sjp_0017630
Smp_041730.2	Sjp_0000690		Smp_065060	Sjp_0017610
Smp_041740.1	Sjp_0000740		Smp_065110	Sjp_0017690
Smp_041750.1	Sjp_0000720		Smp_065110	Sjp_0127870
Smp_041760.1	Sjp_0000710		Smp_065120	Sjp_0017580
Smp_041770.1	Sjp_0000700		Smp_065130	Sjp_0017550
Smp_041820.1	Sjp_0000780		Smp_065150	Sjp_0134510
Smp_041830.1	Sjp_0000800		Smp_065160	Sjp_0017500
Smp_041880.1	Sjp_0000820		Smp_065190	Sjp_0095650
Smp_041890.2	Sjp_0000830		Smp_065210	Sjp_0108800
Smp_041960.1	Sjp_0000870		Smp_065240	Sjp_0049540
Smp_041970.1	Sjp_0066860		Smp_065280	Sjp_0049560
Smp_041980.1	Sjp_0000880		Smp_065290	Sjp_0049580
Smp_042020.1	Sjp_0000930		Smp_065370	Sjp_0046110
Smp_042030.1	Sjp_0000940		Smp_065420	Sjp_0046070
Smp_042050.1	Sjp_0000960		Smp_065470	Sjp_0055320
Smp_042090.3	Sjp_0102800		Smp_065530	Sjp_0101080
Smp_042110.1	Sjp_0102780		Smp_065650	Sjp_0008430
Smp_042150.1	Sjp_0031640		Smp_065810	Sjp_0084420
Smp_042160.2	Sjp_0031630		Smp_065890	Sjp_0115070
Smp_042170.1	Sjp_0031620		Smp_065890	Sjp_0112960
Smp_042210.1	Sjp_0088650		Smp_066010	Sjp_0026290
Smp_042230.1	Sjp_0003500		Smp_066150	Sjp_0022410
Smp_042270.2	Sjp_0003450		Smp_066250	Sjp_0046730
Smp_042280.1	Sjp_0003440		Smp_066330	Sjp_0038430
Smp_042300.2	Sjp_0003420		Smp_066340	Sjp_0014560
Smp_042340.1	Sjp_0003360		Smp_066430	Sjp_0048550
Smp_042390.1	Sjp_0003310		Smp_066480	Sjp_0090590
Smp_042400.1	Sjp_0061480		Smp_066610	Sjp_0005890
Smp_042420.1	Sjp_0061510		Smp_066620	Sjp_0005900
Smp_042430.1	Sjp_0061520		Smp_066630	Sjp_0005880
Smp_042440.1	Sjp_0013330		Smp_066710	Sjp_0092010
Smp_042530.1	Sjp_0016340		Smp_066730	Sjp_0005860
Smp_042550.1	Sjp_0016370		Smp_066740	Sjp_0005850
Smp_042560.1	Sjp_0016380		Smp_066770	Sjp_0082450
Smp_042590.1	Sjp_0063950		Smp_066820	Sjp_0037650
Smp_042650.1	Sjp_0100440		Smp_066890	Sjp_0103750
Smp_042670.1	Sjp_0058170		Smp_066940	Sjp_0001920
Smp_042680.1	Sjp_0058160		Smp_066950	Sjp_0001930
Smp_042690.1	Sjp_0058150		Smp_066990	Sjp_0066500
Smp_042700.1	Sjp_0058140		Smp_067000	Sjp_0066420
Smp_042720.1	Sjp_0130970		Smp_067010	Sjp_0066460
Smp_042740.1	Sjp_0114990		Smp_067090	Sjp_0089430
Smp_042770.1	Sjp_0062560		Smp_067120	Sjp_0068150
Smp_042790.1	Sjp_0062550		Smp_067250	Sjp_0084170
Smp_042810.1	Sjp_0062530		Smp_067260	Sjp_0084180
Smp_042910.1	Sjp_0040920		Smp_067400	Sjp_0031190
Smp_042920.1	Sjp_0040930		Smp_067510	Sjp_0105570
Smp_042980.1	Sjp_0034900		Smp_067540	Sjp_0064510
Smp_042990.2	Sjp_0034890		Smp_067580	Sjp_0064480
Smp_043010.1	Sjp_0114770		Smp_067590	Sjp_0064470
Smp_043030.1	Sjp_0034910		Smp_067620	Sjp_0066850
Smp_043040.1	Sjp_0034920		Smp_067900	Sjp_0022970
Smp_043070.1	Sjp_0086600		Smp_067930	Sjp_0023010
Smp_043100.1	Sjp_0102410		Smp_067940	Sjp_0023020
Smp_043120.1	Sjp_0061560		Smp_068070	Sjp_0069920
Smp_043130.1	Sjp_0061590		Smp_068080	Sjp_0069940
Smp_043150.1	Sjp_0061580		Smp_068090	Sjp_0069960
Smp_043170.1	Sjp_0013890		Smp_068100	Sjp_0097670
Smp_043200.1	Sjp_0013910		Smp_068110	Sjp_0069970
Smp_043210.1	Sjp_0013920		Smp_068120	Sjp_0069980
Smp_043220.1	Sjp_0013940		Smp_068250	Sjp_0048650
Smp_043250.1	Sjp_0038780		Smp_068270	Sjp_0064040
Smp_043260.1	Sjp_0100900		Smp_068300	Sjp_0114110
Smp_043270.1	Sjp_0039620		Smp_068340	Sjp_0034760
Smp_043290.1	Sjp_0039610		Smp_068350	Sjp_0034740
Smp_043340.1	Sjp_0039600		Smp_068400	Sjp_0106110
Smp_043350.1	Sjp_0039630		Smp_068420	Sjp_0005830
Smp_043360.1	Sjp_0039640		Smp_068480	Sjp_0070250
Smp_043390.1	Sjp_0106580		Smp_068500	Sjp_0072390
Smp_043420.1	Sjp_0087540		Smp_068530	Sjp_0038980
Smp_043430.1	Sjp_0087550		Smp_068680	Sjp_0111480
Smp_043500.1	Sjp_0134210		Smp_068760	Sjp_0022630
Smp_043580.1	Sjp_0101120		Smp_069120	Sjp_0105770
Smp_043600.1	Sjp_0047410		Smp_069120	Sjp_0097420
Smp_043610.1	Sjp_0065150		Smp_069220	Sjp_0013480
Smp_043650.1	Sjp_0065180		Smp_069670	Sjp_0010160
Smp_043670.1	Sjp_0065200		Smp_069720	Sjp_0083340
Smp_043820.1	Sjp_0112360		Smp_069760	Sjp_0093380
Smp_043860.1	Sjp_0087220		Smp_069770	Sjp_0093390
Smp_043920.1	Sjp_0014910		Smp_069810	Sjp_0004820
Smp_043930.1	Sjp_0014920		Smp_069820	Sjp_0050930
Smp_043940.2	Sjp_0014900		Smp_069840	Sjp_0050940
Smp_043970.1	Sjp_0014880		Smp_069890	Sjp_0039570
Smp_043990.1	Sjp_0103220		Smp_069910	Sjp_0047610
Smp_044000.1	Sjp_0103210		Smp_069960	Sjp_0047560
Smp_044010.1	Sjp_0103200		Smp_070000	Sjp_0076220
Smp_044010.2	Sjp_0018770		Smp_070020	Sjp_0095420
Smp_044060.1	Sjp_0122190		Smp_070030	Sjp_0099860
Smp_044160.1	Sjp_0097220		Smp_070070	Sjp_0022930
Smp_044250.1	Sjp_0090150		Smp_070100	Sjp_0101280
Smp_044260.2	Sjp_0084550		Smp_070110	Sjp_0113130
Smp_044280.1	Sjp_0009930		Smp_070130	Sjp_0054090
Smp_044400.1	Sjp_0056360		Smp_070190	Sjp_0076690
Smp_044440.1	Sjp_0102900		Smp_070330	Sjp_0032040
Smp_044470.1	Sjp_0074230		Smp_070540	Sjp_0067140
Smp_044530.1	Sjp_0093310		Smp_070600	Sjp_0070900
Smp_044550.8	Sjp_0091270		Smp_070630	Sjp_0057560
Smp_044580.1	Sjp_0066600		Smp_070680	Sjp_0059570
Smp_044680.1	Sjp_0099500		Smp_070690	Sjp_0059600
Smp_044690.1	Sjp_0047520		Smp_070710	Sjp_0092410
Smp_044750.1	Sjp_0047420		Smp_070760	Sjp_0068080
Smp_044770.1	Sjp_0005260		Smp_070770	Sjp_0068070
Smp_044800.1	Sjp_0005220		Smp_070920	Sjp_0060140
Smp_044810.1	Sjp_0019740		Smp_071000	Sjp_0060230
Smp_044820.1	Sjp_0019750		Smp_071050	Sjp_0133780
Smp_044850.1	Sjp_0048490		Smp_071150	Sjp_0026010
Smp_044870.1	Sjp_0082120		Smp_071200	Sjp_0033760
Smp_044950.1	Sjp_0082890		Smp_071470	Sjp_0076100
Smp_044970.1	Sjp_0073030		Smp_071540	Sjp_0113910
Smp_045040.1	Sjp_0064940		Smp_071550	Sjp_0094020
Smp_045060.1	Sjp_0051700		Smp_071560	Sjp_0094030
Smp_045070.1	Sjp_0064900		Smp_071570	Sjp_0094040
Smp_045200.1	Sjp_0081150		Smp_071590	Sjp_0099120
Smp_045220.1	Sjp_0113510		Smp_071810	Sjp_0030230
Smp_045230.1	Sjp_0083890		Smp_071830	Sjp_0030240
Smp_045250.1	Sjp_0050590		Smp_071880	Sjp_0019830
Smp_045260.1	Sjp_0050580		Smp_071890	Sjp_0019840
Smp_045300.1	Sjp_0040430		Smp_071950	Sjp_0019810
Smp_045310.1	Sjp_0040450		Smp_071960	Sjp_0019800
Smp_045330.1	Sjp_0099900		Smp_072080	Sjp_0131290
Smp_045360.3	Sjp_0055460		Smp_072090	Sjp_0131300
Smp_045410.1	Sjp_0018340		Smp_072110	Sjp_0076950
Smp_045430.3	Sjp_0094960		Smp_072180	Sjp_0041270
Smp_045470.1	Sjp_0113170		Smp_072190	Sjp_0041250
Smp_045480.2	Sjp_0018410		Smp_072360	Sjp_0044210
Smp_045500.1	Sjp_0065640		Smp_072370	Sjp_0044220
Smp_045510.1	Sjp_0065660		Smp_072380	Sjp_0044230
Smp_045560.1	Sjp_0061870		Smp_072440	Sjp_0089180
Smp_045590.1	Sjp_0034340		Smp_072460	Sjp_0047170
Smp_045600.1	Sjp_0034350		Smp_072470	Sjp_0047180
Smp_045610.1	Sjp_0034360		Smp_072490	Sjp_0047210
Smp_045620.1	Sjp_0047510		Smp_072500	Sjp_0047230
Smp_045640.1	Sjp_0107430		Smp_072560	Sjp_0046940
Smp_045650.1	Sjp_0047480		Smp_072640	Sjp_0008770
Smp_045710.1	Sjp_0107190		Smp_072660	Sjp_0008790
Smp_045730.1	Sjp_0094980		Smp_072740	Sjp_0039680
Smp_045750.2	Sjp_0086500		Smp_072890	Sjp_0022140
Smp_045760.1	Sjp_0086490		Smp_072900	Sjp_0069440
Smp_045780.1	Sjp_0096390		Smp_072970	Sjp_0132350
Smp_045790.1	Sjp_0096380		Smp_073050	Sjp_0023810
Smp_045810.1	Sjp_0075570		Smp_073080	Sjp_0077570
Smp_045860.1	Sjp_0041130		Smp_073140	Sjp_0027840
Smp_045920.2	Sjp_0103790		Smp_073200	Sjp_0117100
Smp_045940.1	Sjp_0033440		Smp_073210	Sjp_0117090
Smp_045950.1	Sjp_0033430		Smp_073220	Sjp_0025120
Smp_045960.1	Sjp_0086270		Smp_073270	Sjp_0069670
Smp_045980.1	Sjp_0098210		Smp_073290	Sjp_0069650
Smp_045990.1	Sjp_0082840		Smp_073300	Sjp_0069640
Smp_046000.1	Sjp_0082850		Smp_073390	Sjp_0002440
Smp_046020.1	Sjp_0101350		Smp_073450	Sjp_0002400
Smp_046060.1	Sjp_0035730		Smp_073490	Sjp_0112530
Smp_046090.2	Sjp_0035720		Smp_073540	Sjp_0067090
Smp_046100.1	Sjp_0035700		Smp_073560	Sjp_0025130
Smp_046130.1	Sjp_0035670		Smp_073560	Sjp_0071950
Smp_046140.1	Sjp_0035680		Smp_073600	Sjp_0084940
Smp_046160.1	Sjp_0035690		Smp_073610	Sjp_0094090
Smp_046190.1	Sjp_0050360		Smp_073690	Sjp_0091590
Smp_046250.1	Sjp_0036440		Smp_073720	Sjp_0081250
Smp_046280.1	Sjp_0026620		Smp_073800	Sjp_0083520
Smp_046360.1	Sjp_0072480		Smp_073880	Sjp_0077210
Smp_046410.1	Sjp_0075220		Smp_073890	Sjp_0047160
Smp_046450.1	Sjp_0074280		Smp_073940	Sjp_0047110
Smp_046500.2	Sjp_0075590		Smp_073990	Sjp_0080970
Smp_046550.1	Sjp_0042600		Smp_074000	Sjp_0098120
Smp_046600.1	Sjp_0042620		Smp_074010	Sjp_0080960
Smp_046630.1	Sjp_0042670		Smp_074040	Sjp_0114730
Smp_046640.1	Sjp_0022720		Smp_074050	Sjp_0035090
Smp_046650.1	Sjp_0022730		Smp_074060	Sjp_0119340
Smp_046680.1	Sjp_0022740		Smp_074070	Sjp_0035060
Smp_046690.1	Sjp_0031660		Smp_074200	Sjp_0061650
Smp_046740.1	Sjp_0031700		Smp_074210	Sjp_0061660
Smp_046750.1	Sjp_0094150		Smp_074230	Sjp_0061690
Smp_046790.1	Sjp_0041820		Smp_074260	Sjp_0061710
Smp_046800.1	Sjp_0041830		Smp_074280	Sjp_0124660
Smp_046810.1	Sjp_0041840		Smp_074370	Sjp_0134580
Smp_046870.1	Sjp_0052180		Smp_074390	Sjp_0023320
Smp_046880.1	Sjp_0052190		Smp_074410	Sjp_0023340
Smp_046890.1	Sjp_0085700		Smp_074460	Sjp_0077470
Smp_046900.1	Sjp_0094170		Smp_074500	Sjp_0075650
Smp_046910.1	Sjp_0094180		Smp_074560	Sjp_0090520
Smp_046930.1	Sjp_0041880		Smp_074590	Sjp_0078660
Smp_046980.1	Sjp_0079920		Smp_074700	Sjp_0087240
Smp_047060.1	Sjp_0079880		Smp_074710	Sjp_0037510
Smp_047090.1	Sjp_0114500		Smp_074770	Sjp_0111380
Smp_047100.1	Sjp_0081960		Smp_074780	Sjp_0058880
Smp_047110.1	Sjp_0081950		Smp_074870	Sjp_0100540
Smp_047190.1	Sjp_0067780		Smp_074880	Sjp_0100530
Smp_047200.1	Sjp_0075700		Smp_074900	Sjp_0060720
Smp_047240.1	Sjp_0079160		Smp_074950	Sjp_0095880
Smp_047330.1	Sjp_0106560		Smp_075110	Sjp_0046930
Smp_047360.1	Sjp_0024410		Smp_075140	Sjp_0120360
Smp_047370.1	Sjp_0024400		Smp_075290	Sjp_0104220
Smp_047400.1	Sjp_0024430		Smp_075330	Sjp_0071300
Smp_047420.1	Sjp_0024440		Smp_075360	Sjp_0071270
Smp_047440.1	Sjp_0024460		Smp_075440	Sjp_0060420
Smp_047450.1	Sjp_0029540		Smp_075450	Sjp_0060410
Smp_047460.1	Sjp_0029490		Smp_075470	Sjp_0064140
Smp_047500.1	Sjp_0029470		Smp_075560	Sjp_0055670
Smp_047540.1	Sjp_0072700		Smp_075640	Sjp_0037400
Smp_047550.1	Sjp_0072670		Smp_075770	Sjp_0057020
Smp_047620.1	Sjp_0104040		Smp_075870	Sjp_0046180
Smp_047650.1	Sjp_0024480		Smp_075950	Sjp_0111150
Smp_047700.1	Sjp_0024510		Smp_076010	Sjp_0003210
Smp_047720.1	Sjp_0031450		Smp_076030	Sjp_0095440
Smp_047740.1	Sjp_0024600		Smp_076050	Sjp_0099220
Smp_047860.1	Sjp_0020610		Smp_076150	Sjp_0079640
Smp_047870.1	Sjp_0049810		Smp_076300	Sjp_0067660
Smp_047900.1	Sjp_0044730		Smp_076370	Sjp_0058520
Smp_048040.1	Sjp_0042450		Smp_076390	Sjp_0058500
Smp_048080.1	Sjp_0021200		Smp_076450	Sjp_0121180
Smp_048160.1	Sjp_0020860		Smp_076530	Sjp_0077900
Smp_048230.1	Sjp_0020970		Smp_076560	Sjp_0106150
Smp_048240.1	Sjp_0020950		Smp_076590	Sjp_0032880
Smp_048260.2	Sjp_0021000		Smp_076620	Sjp_0064330
Smp_048270.1	Sjp_0021010		Smp_076630	Sjp_0026850
Smp_048310.1	Sjp_0021060		Smp_076740	Sjp_0103720
Smp_048380.1	Sjp_0021110		Smp_076860	Sjp_0001520
Smp_048420.1	Sjp_0021170		Smp_076880	Sjp_0019990
Smp_048430.1	Sjp_0021180		Smp_076910	Sjp_0019970
Smp_048520.1	Sjp_0052490		Smp_076930	Sjp_0019940
Smp_048540.1	Sjp_0060110		Smp_076960	Sjp_0019910
Smp_048550.1	Sjp_0060120		Smp_077010	Sjp_0086620
Smp_048560.1	Sjp_0094310		Smp_077020	Sjp_0086610
Smp_048620.1	Sjp_0087950		Smp_077070	Sjp_0006250
Smp_048650.1	Sjp_0114570		Smp_077090	Sjp_0006260
Smp_048660.1	Sjp_0076200		Smp_077180	Sjp_0006300
Smp_048680.1	Sjp_0094990		Smp_077230	Sjp_0100220
Smp_048690.1	Sjp_0027890		Smp_077330	Sjp_0058750
Smp_048760.1	Sjp_0048010		Smp_077390	Sjp_0029710
Smp_048870.1	Sjp_0070810		Smp_077400	Sjp_0029700
Smp_048880.1	Sjp_0070820		Smp_077500	Sjp_0097200
Smp_048940.1	Sjp_0082090		Smp_077540	Sjp_0023720
Smp_048970.1	Sjp_0075070		Smp_077580	Sjp_0023660
Smp_048980.1	Sjp_0092040		Smp_077590	Sjp_0023650
Smp_048990.1	Sjp_0112790		Smp_077670	Sjp_0020400
Smp_049000.1	Sjp_0077380		Smp_077790	Sjp_0109730
Smp_049010.1	Sjp_0024140		Smp_078050	Sjp_0114890
Smp_049140.1	Sjp_0067250		Smp_078060	Sjp_0067890
Smp_049160.1	Sjp_0067240		Smp_078200	Sjp_0065220
Smp_049170.1	Sjp_0073390		Smp_078230	Sjp_0087480
Smp_049230.1	Sjp_0021230		Smp_078240	Sjp_0052270
Smp_049270.1	Sjp_0094770		Smp_078280	Sjp_0084950
Smp_049280.1	Sjp_0021270		Smp_078310	Sjp_0101530
Smp_049300.3	Sjp_0021240		Smp_078320	Sjp_0108940
Smp_049330.1	Sjp_0021290		Smp_078400	Sjp_0067520
Smp_049380.1	Sjp_0021360		Smp_078550	Sjp_0078280
Smp_049500.1	Sjp_0010440		Smp_078610	Sjp_0075480
Smp_049510.1	Sjp_0010430		Smp_078610	Sjp_0075490
Smp_049520.1	Sjp_0010420		Smp_078640	Sjp_0075470
Smp_049550.1	Sjp_0010400		Smp_078700	Sjp_0033920
Smp_049580.1	Sjp_0010500		Smp_078710	Sjp_0033910
Smp_049600.4	Sjp_0073570		Smp_078730	Sjp_0002940
Smp_049610.1	Sjp_0040690		Smp_078750	Sjp_0099770
Smp_049630.1	Sjp_0040700		Smp_078920	Sjp_0072140
Smp_049680.1	Sjp_0010520		Smp_079050	Sjp_0132960
Smp_049730.2	Sjp_0083220		Smp_079140	Sjp_0017840
Smp_049740.1	Sjp_0080490		Smp_079240	Sjp_0025080
Smp_049760.1	Sjp_0023430		Smp_079270	Sjp_0092480
Smp_049880.1	Sjp_0012860		Smp_079290	Sjp_0066180
Smp_049910.1	Sjp_0012820		Smp_079370	Sjp_0024740
Smp_049920.3	Sjp_0012810		Smp_079390	Sjp_0071940
Smp_049930.1	Sjp_0012800		Smp_079420	Sjp_0079740
Smp_049970.5	Sjp_0099260		Smp_079430	Sjp_0071910
Smp_049990.1	Sjp_0035550		Smp_079450	Sjp_0030820
Smp_050110.1	Sjp_0114800		Smp_079490	Sjp_0074760
Smp_050130.1	Sjp_0045030		Smp_079570	Sjp_0097390
Smp_050160.1	Sjp_0045050		Smp_079700	Sjp_0074890
Smp_050220.1	Sjp_0045140		Smp_079730	Sjp_0072240
Smp_050250.1	Sjp_0035620		Smp_079750	Sjp_0072260
Smp_050270.1	Sjp_0086850		Smp_079760	Sjp_0072270
Smp_050280.1	Sjp_0091020		Smp_079810	Sjp_0072330
Smp_050350.3	Sjp_0018680		Smp_079840	Sjp_0011310
Smp_050360.1	Sjp_0018690		Smp_079910	Sjp_0095580
Smp_050380.1	Sjp_0018650		Smp_079920	Sjp_0055140
Smp_050390.1	Sjp_0046010		Smp_079950	Sjp_0105230
Smp_050430.1	Sjp_0041440		Smp_080100	Sjp_0000560
Smp_050470.1	Sjp_0046360		Smp_080110	Sjp_0000550
Smp_050540.1	Sjp_0090850		Smp_080180	Sjp_0000520
Smp_050570.1	Sjp_0039950		Smp_080280	Sjp_0086070
Smp_050590.1	Sjp_0031810		Smp_080370	Sjp_0106040
Smp_050630.1	Sjp_0035140		Smp_080520	Sjp_0111700
Smp_050640.1	Sjp_0085260		Smp_080530	Sjp_0092450
Smp_050700.1	Sjp_0115510		Smp_080610	Sjp_0093540
Smp_050730.1	Sjp_0115120		Smp_080650	Sjp_0023130
Smp_050820.1	Sjp_0085090		Smp_080850	Sjp_0030860
Smp_050830.1	Sjp_0073930		Smp_080920	Sjp_0074560
Smp_050880.1	Sjp_0018190		Smp_080980	Sjp_0024730
Smp_050920.1	Sjp_0018160		Smp_081200	Sjp_0052770
Smp_050940.1	Sjp_0018120		Smp_081260	Sjp_0132070
Smp_051000.1	Sjp_0018080		Smp_081380	Sjp_0064570
Smp_051060.1	Sjp_0026720		Smp_081410	Sjp_0110360
Smp_051070.1	Sjp_0018100		Smp_081420	Sjp_0021920
Smp_051080.1	Sjp_0026700		Smp_081440	Sjp_0078230
Smp_051110.1	Sjp_0026660		Smp_081470	Sjp_0059130
Smp_051130.1	Sjp_0026650		Smp_081510	Sjp_0059170
Smp_051210.1	Sjp_0070960		Smp_081820	Sjp_0071220
Smp_051220.1	Sjp_0070970		Smp_082030	Sjp_0008070
Smp_051230.1	Sjp_0104250		Smp_082120	Sjp_0082240
Smp_051260.1	Sjp_0006150		Smp_082330	Sjp_0095820
Smp_051280.1	Sjp_0006170		Smp_082370	Sjp_0011150
Smp_051300.1	Sjp_0006180		Smp_082370	Sjp_0134090
Smp_051320.1	Sjp_0006220		Smp_082560	Sjp_0086520
Smp_051360.2	Sjp_0056980		Smp_082570	Sjp_0074810
Smp_051400.1	Sjp_0057280		Smp_082620	Sjp_0042800
Smp_051410.1	Sjp_0057290		Smp_082660	Sjp_0019600
Smp_051510.1	Sjp_0027720		Smp_082710	Sjp_0019650
Smp_051530.1	Sjp_0027710		Smp_082740	Sjp_0019730
Smp_051550.1	Sjp_0068470		Smp_082790	Sjp_0030420
Smp_051760.1	Sjp_0073230		Smp_082800	Sjp_0094580
Smp_051810.1	Sjp_0062200		Smp_082860	Sjp_0030360
Smp_051920.2	Sjp_0060520		Smp_082940	Sjp_0011220
Smp_051930.1	Sjp_0042730		Smp_083020	Sjp_0030610
Smp_051990.1	Sjp_0042750		Smp_083030	Sjp_0030600
Smp_052060.1	Sjp_0022280		Smp_083080	Sjp_0004180
Smp_052140.1	Sjp_0022350		Smp_083120	Sjp_0062800
Smp_052150.1	Sjp_0022360		Smp_083130	Sjp_0062810
Smp_052160.1	Sjp_0022370		Smp_083150	Sjp_0069460
Smp_052230.1	Sjp_0090430		Smp_083180	Sjp_0060840
Smp_052280.1	Sjp_0089380		Smp_083340	Sjp_0078090
Smp_052290.1	Sjp_0089370		Smp_083380	Sjp_0042120
Smp_052330.1	Sjp_0026530		Smp_083410	Sjp_0042030
Smp_052350.1	Sjp_0026540		Smp_083430	Sjp_0110290
Smp_052390.1	Sjp_0026470		Smp_083450	Sjp_0011820
Smp_052500.1	Sjp_0020640		Smp_083480	Sjp_0094290
Smp_052640.1	Sjp_0038800		Smp_083480	Sjp_0096270
Smp_052660.1	Sjp_0088520		Smp_083530	Sjp_0035290
Smp_052710.1	Sjp_0131840		Smp_083680	Sjp_0098640
Smp_052730.1	Sjp_0025690		Smp_083720	Sjp_0071850
Smp_052740.1	Sjp_0025720		Smp_083730	Sjp_0073010
Smp_052750.1	Sjp_0025710		Smp_083780	Sjp_0082980
Smp_052760.1	Sjp_0025700		Smp_083790	Sjp_0082970
Smp_052780.1	Sjp_0026110		Smp_083880	Sjp_0045230
Smp_052790.1	Sjp_0026100		Smp_083930	Sjp_0045170
Smp_052810.1	Sjp_0026090		Smp_083970	Sjp_0129170
Smp_052870.1	Sjp_0042970		Smp_084010	Sjp_0084640
Smp_052880.1	Sjp_0097680		Smp_084060	Sjp_0134900
Smp_052890.1	Sjp_0047760		Smp_084320	Sjp_0087370
Smp_052910.1	Sjp_0047790		Smp_084460	Sjp_0050130
Smp_053020.1	Sjp_0082350		Smp_084520	Sjp_0003050
Smp_053030.1	Sjp_0082340		Smp_084540	Sjp_0003030
Smp_053060.1	Sjp_0076610		Smp_084620	Sjp_0006620
Smp_053100.1	Sjp_0019580		Smp_084830	Sjp_0011330
Smp_053120.1	Sjp_0074180		Smp_084870	Sjp_0027180
Smp_053130.1	Sjp_0074090		Smp_084890	Sjp_0027190
Smp_053140.1	Sjp_0074100		Smp_084900	Sjp_0027200
Smp_053160.1	Sjp_0074120		Smp_084910	Sjp_0027210
Smp_053220.1	Sjp_0099430		Smp_085070	Sjp_0056090
Smp_053230.1	Sjp_0105850		Smp_085080	Sjp_0056100
Smp_053300.1	Sjp_0016100		Smp_085150	Sjp_0101270
Smp_053390.1	Sjp_0066230		Smp_085290	Sjp_0020820
Smp_053420.1	Sjp_0088320		Smp_085300	Sjp_0020810
Smp_053470.1	Sjp_0048720		Smp_085310	Sjp_0020800
Smp_053510.1	Sjp_0051950		Smp_085410	Sjp_0131890
Smp_053520.1	Sjp_0051970		Smp_085480	Sjp_0064350
Smp_053550.1	Sjp_0052010		Smp_085490	Sjp_0096170
Smp_053560.1	Sjp_0052020		Smp_085500	Sjp_0096190
Smp_053610.1	Sjp_0052070		Smp_085520	Sjp_0054810
Smp_053640.1	Sjp_0052100		Smp_085530	Sjp_0132010
Smp_053700.1	Sjp_0134820		Smp_085640	Sjp_0046570
Smp_053780.1	Sjp_0087990		Smp_085680	Sjp_0082080
Smp_053800.1	Sjp_0087980		Smp_085740	Sjp_0032740
Smp_053820.1	Sjp_0019480		Smp_085750	Sjp_0032730
Smp_053830.1	Sjp_0019470		Smp_085780	Sjp_0032710
Smp_053900.1	Sjp_0019530		Smp_085790	Sjp_0032680
Smp_053940.1	Sjp_0020710		Smp_085830	Sjp_0006910
Smp_053990.1	Sjp_0113670		Smp_085990	Sjp_0096670
Smp_054010.1	Sjp_0018300		Smp_086030	Sjp_0018480
Smp_054070.1	Sjp_0108990		Smp_086060	Sjp_0066640
Smp_054120.1	Sjp_0061080		Smp_086110	Sjp_0110880
Smp_054160.1	Sjp_0063550		Smp_086190	Sjp_0037460
Smp_054170.1	Sjp_0073820		Smp_086210	Sjp_0002580
Smp_054200.1	Sjp_0063520		Smp_086220	Sjp_0002590
Smp_054220.1	Sjp_0063530		Smp_086270	Sjp_0096830
Smp_054230.1	Sjp_0075150		Smp_086450	Sjp_0020780
Smp_054240.1	Sjp_0075160		Smp_086460	Sjp_0056170
Smp_054300.1	Sjp_0070210		Smp_086760	Sjp_0089790
Smp_054310.1	Sjp_0070220		Smp_086910	Sjp_0074170
Smp_054320.1	Sjp_0070240		Smp_086960	Sjp_0057630
Smp_054330.1	Sjp_0070260		Smp_087220	Sjp_0013270
Smp_054340.2	Sjp_0070270		Smp_087230	Sjp_0013260
Smp_054350.1	Sjp_0070280		Smp_087330	Sjp_0013300
Smp_054410.1	Sjp_0031590		Smp_087340	Sjp_0013310
Smp_054430.1	Sjp_0100840		Smp_087430	Sjp_0069720
Smp_054450.1	Sjp_0083550		Smp_087440	Sjp_0069730
Smp_054470.1	Sjp_0101230		Smp_087550	Sjp_0032780
Smp_054540.1	Sjp_0085580		Smp_087560	Sjp_0032790
Smp_054560.1	Sjp_0085560		Smp_087580	Sjp_0078410
Smp_054600.1	Sjp_0102720		Smp_087690	Sjp_0053050
Smp_054610.1	Sjp_0105730		Smp_087860	Sjp_0081430
Smp_054620.1	Sjp_0073790		Smp_087870	Sjp_0081450
Smp_054740.1	Sjp_0100680		Smp_087980	Sjp_0123440
Smp_054770.1	Sjp_0048220		Smp_088090	Sjp_0114670
Smp_054780.1	Sjp_0101740		Smp_088240	Sjp_0050440
Smp_054790.2	Sjp_0081720		Smp_088250	Sjp_0050450
Smp_054800.1	Sjp_0061800		Smp_088260	Sjp_0021890
Smp_054810.1	Sjp_0048180		Smp_088270	Sjp_0005020
Smp_054820.1	Sjp_0048210		Smp_088310	Sjp_0004970
Smp_054840.1	Sjp_0072100		Smp_088380	Sjp_0034500
Smp_055050.1	Sjp_0070710		Smp_088390	Sjp_0034490
Smp_055090.1	Sjp_0075430		Smp_088420	Sjp_0069500
Smp_055130.1	Sjp_0089630		Smp_088460	Sjp_0034190
Smp_055140.1	Sjp_0089640		Smp_088550	Sjp_0034100
Smp_055190.1	Sjp_0061630		Smp_088600	Sjp_0008230
Smp_055200.1	Sjp_0089680		Smp_088620	Sjp_0059710
Smp_055210.1	Sjp_0061600		Smp_088660	Sjp_0008180
Smp_055220.3	Sjp_0061620		Smp_088920	Sjp_0118100
Smp_055240.1	Sjp_0081580		Smp_088940	Sjp_0060690
Smp_055310.1	Sjp_0018990		Smp_088990	Sjp_0114440
Smp_055340.1	Sjp_0018970		Smp_089000	Sjp_0004120
Smp_055390.1	Sjp_0059520		Smp_089050	Sjp_0112610
Smp_055420.2	Sjp_0059490		Smp_089060	Sjp_0004190
Smp_055440.1	Sjp_0038340		Smp_089100	Sjp_0055950
Smp_055450.1	Sjp_0038330		Smp_089100	Sjp_0004210
Smp_055500.1	Sjp_0081820		Smp_089120	Sjp_0030650
Smp_055600.1	Sjp_0100010		Smp_089240	Sjp_0012740
Smp_055650.1	Sjp_0064750		Smp_089400	Sjp_0099080
Smp_055670.1	Sjp_0064730		Smp_089400	Sjp_0117390
Smp_055720.3	Sjp_0075420		Smp_089400	Sjp_0099070
Smp_055740.1	Sjp_0131790		Smp_089590	Sjp_0057940
Smp_055760.1	Sjp_0093270		Smp_089630	Sjp_0041710
Smp_055770.1	Sjp_0093260		Smp_089640	Sjp_0062650
Smp_055780.1	Sjp_0093230		Smp_089650	Sjp_0062660
Smp_055800.1	Sjp_0112740		Smp_089670	Sjp_0062680
Smp_055870.1	Sjp_0071080		Smp_089700	Sjp_0081260
Smp_055880.2	Sjp_0071040		Smp_089880	Sjp_0063150
Smp_055890.1	Sjp_0071060		Smp_090030	Sjp_0065930
Smp_055900.3	Sjp_0071050		Smp_090070	Sjp_0085730
Smp_055920.1	Sjp_0016020		Smp_090140	Sjp_0097130
Smp_055960.1	Sjp_0015960		Smp_090230	Sjp_0090700
Smp_055990.1	Sjp_0015930		Smp_090240	Sjp_0099240
Smp_056060.1	Sjp_0096600		Smp_090340	Sjp_0042320
Smp_056080.1	Sjp_0132430		Smp_090370	Sjp_0066140
Smp_056200.1	Sjp_0028730		Smp_090450	Sjp_0050640
Smp_056240.1	Sjp_0040500		Smp_090690	Sjp_0028060
Smp_056260.1	Sjp_0038840		Smp_090790	Sjp_0027910
Smp_056280.1	Sjp_0045350		Smp_090820	Sjp_0027940
Smp_056290.1	Sjp_0045330		Smp_090870	Sjp_0010270
Smp_056350.1	Sjp_0012600		Smp_090890	Sjp_0010250
Smp_056360.6	Sjp_0012620		Smp_091000	Sjp_0040010
Smp_056390.1	Sjp_0012670		Smp_091010	Sjp_0078530
Smp_056440.1	Sjp_0077340		Smp_091170	Sjp_0048690
Smp_056500.1	Sjp_0068310		Smp_091210	Sjp_0126680
Smp_056620.1	Sjp_0003760		Smp_091230	Sjp_0001970
Smp_056640.1	Sjp_0003750		Smp_091360	Sjp_0041300
Smp_056700.1	Sjp_0042090		Smp_091380	Sjp_0041320
Smp_056760.1	Sjp_0045820		Smp_091390	Sjp_0041330
Smp_056780.1	Sjp_0076890		Smp_091460	Sjp_0041380
Smp_056810.1	Sjp_0076860		Smp_091640	Sjp_0052260
Smp_056850.1	Sjp_0028110		Smp_091730	Sjp_0115420
Smp_056860.1	Sjp_0028120		Smp_091740	Sjp_0115410
Smp_056890.1	Sjp_0028160		Smp_091750	Sjp_0102230
Smp_056900.1	Sjp_0028190		Smp_091870	Sjp_0101770
Smp_056930.1	Sjp_0019550		Smp_092020	Sjp_0044060
Smp_056970.1	Sjp_0025800		Smp_092170	Sjp_0074640
Smp_057020.1	Sjp_0082780		Smp_092180	Sjp_0078830
Smp_057060.1	Sjp_0083610		Smp_092320	Sjp_0024240
Smp_057090.1	Sjp_0053540		Smp_092380	Sjp_0024330
Smp_057120.1	Sjp_0053590		Smp_092390	Sjp_0024340
Smp_057140.1	Sjp_0053600		Smp_092490	Sjp_0031960
Smp_057210.1	Sjp_0075800		Smp_092750	Sjp_0058770
Smp_057230.1	Sjp_0075820		Smp_092770	Sjp_0074500
Smp_057320.1	Sjp_0058370		Smp_092780	Sjp_0079460
Smp_057360.1	Sjp_0084070		Smp_092810	Sjp_0071130
Smp_057410.1	Sjp_0102440		Smp_092850	Sjp_0048620
Smp_057430.1	Sjp_0058570		Smp_092880	Sjp_0069150
Smp_057530.1	Sjp_0033000		Smp_092930	Sjp_0063780
Smp_057600.1	Sjp_0047870		Smp_093100	Sjp_0045900
Smp_057620.1	Sjp_0047850		Smp_093160	Sjp_0047860
Smp_057630.1	Sjp_0099410		Smp_093220	Sjp_0052810
Smp_057650.1	Sjp_0093350		Smp_093230	Sjp_0052800
Smp_057710.1	Sjp_0021580		Smp_093310	Sjp_0105380
Smp_057790.1	Sjp_0010990		Smp_093370	Sjp_0025760
Smp_057930.1	Sjp_0012050		Smp_093440	Sjp_0025220
Smp_058050.1	Sjp_0029590		Smp_093450	Sjp_0056190
Smp_058080.1	Sjp_0029570		Smp_093700	Sjp_0071530
Smp_058130.1	Sjp_0097530		Smp_093740	Sjp_0083980
Smp_058140.3	Sjp_0054860		Smp_093750	Sjp_0067760
Smp_058150.1	Sjp_0054850		Smp_093800	Sjp_0091070
Smp_058160.1	Sjp_0054840		Smp_093820	Sjp_0114080
Smp_058170.2	Sjp_0083650		Smp_093830	Sjp_0064110
Smp_058190.1	Sjp_0010030		Smp_093840	Sjp_0042260
Smp_058240.1	Sjp_0112280		Smp_093850	Sjp_0021400
Smp_058270.1	Sjp_0078340		Smp_093920	Sjp_0129510
Smp_058320.1	Sjp_0039330		Smp_093950	Sjp_0102330
Smp_058350.1	Sjp_0033620		Smp_094130	Sjp_0084870
Smp_058360.1	Sjp_0039340		Smp_094320	Sjp_0059950
Smp_058380.1	Sjp_0033650		Smp_094330	Sjp_0023860
Smp_058400.1	Sjp_0033660		Smp_094340	Sjp_0077580
Smp_058410.1	Sjp_0033670		Smp_094360	Sjp_0023790
Smp_058450.1	Sjp_0089990		Smp_094380	Sjp_0008100
Smp_058460.1	Sjp_0104580		Smp_094470	Sjp_0055150
Smp_058470.1	Sjp_0038790		Smp_094500	Sjp_0105830
Smp_058480.1	Sjp_0038810		Smp_094570	Sjp_0053630
Smp_058620.1	Sjp_0080140		Smp_094630	Sjp_0078020
Smp_058650.1	Sjp_0078790		Smp_094640	Sjp_0078030
Smp_058660.1	Sjp_0119510		Smp_094680	Sjp_0044680
Smp_058670.1	Sjp_0092190		Smp_094710	Sjp_0064770
Smp_058680.1	Sjp_0118310		Smp_094820	Sjp_0067670
Smp_058690.1	Sjp_0110610		Smp_094870	Sjp_0065130
Smp_058730.1	Sjp_0101840		Smp_094880	Sjp_0065120
Smp_058850.1	Sjp_0003280		Smp_094890	Sjp_0103110
Smp_058880.1	Sjp_0102470		Smp_094920	Sjp_0115770
Smp_058980.2	Sjp_0040090		Smp_095000	Sjp_0064170
Smp_058990.1	Sjp_0040100		Smp_095130	Sjp_0002380
Smp_059080.1	Sjp_0052920		Smp_095140	Sjp_0101990
Smp_059090.1	Sjp_0003270		Smp_095150	Sjp_0121950
Smp_059130.1	Sjp_0048380		Smp_095190	Sjp_0101890
Smp_059150.1	Sjp_0115730		Smp_095250	Sjp_0067290
Smp_059170.2	Sjp_0115690		Smp_095360	Sjp_0004450
Smp_059200.1	Sjp_0071000		Smp_095410	Sjp_0008580
Smp_059210.4	Sjp_0070990		Smp_095580	Sjp_0113900
Smp_059240.1	Sjp_0118350		Smp_095590	Sjp_0104710
Smp_059290.1	Sjp_0088900		Smp_095670	Sjp_0042190
Smp_059340.1	Sjp_0134230		Smp_095680	Sjp_0042180
Smp_059350.2	Sjp_0093130		Smp_095810	Sjp_0068700
Smp_059360.1	Sjp_0093140		Smp_095920	Sjp_0042490
Smp_059480.1	Sjp_0095720		Smp_096000	Sjp_0043010
Smp_059530.2	Sjp_0094280		Smp_096250	Sjp_0068850
Smp_059540.1	Sjp_0079590		Smp_096290	Sjp_0054190
Smp_059570.1	Sjp_0067940		Smp_096670	Sjp_0129290
Smp_059600.1	Sjp_0008900		Smp_096720	Sjp_0060760
Smp_059660.1	Sjp_0009010		Smp_096750	Sjp_0071790
Smp_059670.1	Sjp_0008950		Smp_096760	Sjp_0071800
Smp_059680.1	Sjp_0008940		Smp_096780	Sjp_0022940
Smp_059690.1	Sjp_0118930		Smp_096790	Sjp_0006990
Smp_059710.1	Sjp_0008920		Smp_096810	Sjp_0007110
Smp_059750.2	Sjp_0049480		Smp_096900	Sjp_0098280
Smp_059780.1	Sjp_0049990		Smp_097090	Sjp_0026450
Smp_059790.2	Sjp_0064680		Smp_097210	Sjp_0094520
Smp_059800.1	Sjp_0071520		Smp_097250	Sjp_0019130
Smp_059810.1	Sjp_0083200		Smp_097280	Sjp_0080820
Smp_059870.1	Sjp_0056920		Smp_097320	Sjp_0105710
Smp_059880.1	Sjp_0056930		Smp_097370	Sjp_0083060
Smp_059910.3	Sjp_0121300		Smp_097500	Sjp_0110860
Smp_059920.3	Sjp_0132220		Smp_097560	Sjp_0002670
Smp_059930.1	Sjp_0057180		Smp_097620	Sjp_0042040
Smp_059980.1	Sjp_0083870		Smp_097730	Sjp_0026780
Smp_060010.1	Sjp_0080500		Smp_097740	Sjp_0026790
Smp_060070.1	Sjp_0040770		Smp_097790	Sjp_0001390
Smp_060080.1	Sjp_0040740		Smp_097830	Sjp_0001600
Smp_060090.1	Sjp_0040720		Smp_098090	Sjp_0014850
Smp_060160.1	Sjp_0062730		Smp_098300	Sjp_0010860
Smp_060170.1	Sjp_0062750		Smp_098320	Sjp_0068340
Smp_060180.1	Sjp_0062760		Smp_098340	Sjp_0078070
Smp_060190.2	Sjp_0116380		Smp_098450	Sjp_0043570
Smp_060210.1	Sjp_0028250		Smp_098560	Sjp_0052120
Smp_060220.1	Sjp_0028230		Smp_098710	Sjp_0038080
Smp_060240.1	Sjp_0095850		Smp_098920	Sjp_0048100
Smp_060290.1	Sjp_0082620		Smp_098960	Sjp_0032430
Smp_060420.3	Sjp_0076320		Smp_098980	Sjp_0032450
Smp_060480.1	Sjp_0074490		Smp_099150	Sjp_0004560
Smp_060560.1	Sjp_0134880		Smp_099160	Sjp_0083830
Smp_060570.1	Sjp_0087700		Smp_099300	Sjp_0007250
Smp_060620.1	Sjp_0048340		Smp_099320	Sjp_0007270
Smp_060660.1	Sjp_0089580		Smp_099420	Sjp_0087520
Smp_060700.1	Sjp_0089610		Smp_099560	Sjp_0134890
Smp_060750.1	Sjp_0058060		Smp_099570	Sjp_0132370
Smp_060820.1	Sjp_0017100		Smp_099850	Sjp_0099660
Smp_060860.1	Sjp_0105140		Smp_099900	Sjp_0049010
Smp_060900.1	Sjp_0081230		Smp_100010	Sjp_0051440
Smp_060910.1	Sjp_0081220		Smp_100040	Sjp_0051410
Smp_060940.1	Sjp_0005210		Smp_100070	Sjp_0051380
Smp_060950.1	Sjp_0005200		Smp_100110	Sjp_0072970
Smp_061000.1	Sjp_0005170		Smp_100130	Sjp_0051320
Smp_061040.1	Sjp_0103960		Smp_100140	Sjp_0012940
Smp_061050.1	Sjp_0056820		Smp_100380	Sjp_0001940
Smp_061100.1	Sjp_0066680		Smp_101310	Sjp_0115910
Smp_061210.1	Sjp_0002250		Smp_101370	Sjp_0058760
Smp_061230.1	Sjp_0002260		Smp_101450	Sjp_0080800
Smp_061250.1	Sjp_0002190		Smp_101670	Sjp_0028690
Smp_061300.1	Sjp_0002310		Smp_101670	Sjp_0028680
Smp_061310.1	Sjp_0002320		Smp_101970	Sjp_0081360
Smp_061400.1	Sjp_0037480		Smp_102280	Sjp_0021860
Smp_061510.1	Sjp_0047620		Smp_102330	Sjp_0100760
Smp_061540.1	Sjp_0008470		Smp_102410	Sjp_0024540
Smp_061560.1	Sjp_0075400		Smp_102450	Sjp_0015290
Smp_061570.1	Sjp_0008480		Smp_102480	Sjp_0038720
Smp_061580.1	Sjp_0010680		Smp_102490	Sjp_0038710
Smp_061590.1	Sjp_0010660		Smp_102750	Sjp_0061940
Smp_061650.1	Sjp_0096060		Smp_102810	Sjp_0044820
Smp_061680.1	Sjp_0010730		Smp_102810	Sjp_0120860
Smp_061840.1	Sjp_0094300		Smp_102810	Sjp_0120630
Smp_061870.1	Sjp_0105460		Smp_102810	Sjp_0029050
Smp_061920.1	Sjp_0052700		Smp_102810	Sjp_0029040
Smp_061940.1	Sjp_0080220		Smp_102820	Sjp_0080830
Smp_061950.1	Sjp_0052690		Smp_102840	Sjp_0063050
Smp_062070.2	Sjp_0085860		Smp_102920	Sjp_0050290
Smp_062250.1	Sjp_0120030		Smp_102930	Sjp_0050300
Smp_062260.1	Sjp_0059830		Smp_102960	Sjp_0069840
Smp_062270.1	Sjp_0059840		Smp_103010	Sjp_0035220
Smp_062300.1	Sjp_0050970		Smp_103090	Sjp_0081690
Smp_062490.1	Sjp_0012360		Smp_103100	Sjp_0081680
Smp_062510.2	Sjp_0012320		Smp_103200	Sjp_0007070
Smp_062520.1	Sjp_0123290		Smp_103210	Sjp_0002130
Smp_062530.1	Sjp_0003700		Smp_103280	Sjp_0024800
Smp_062550.1	Sjp_0003710		Smp_103310	Sjp_0072190
Smp_062560.1	Sjp_0003720		Smp_103340	Sjp_0002450
Smp_062610.1	Sjp_0003660		Smp_103420	Sjp_0097650
Smp_062630.1	Sjp_0062880		Smp_103470	Sjp_0101480
Smp_062680.1	Sjp_0037880		Smp_103540	Sjp_0087810
Smp_062720.5	Sjp_0037930		Smp_103810	Sjp_0022700
Smp_062760.1	Sjp_0037980		Smp_103830	Sjp_0046300
Smp_062790.1	Sjp_0030640		Smp_103930	Sjp_0106360
Smp_062890.1	Sjp_0053370		Smp_103990	Sjp_0014630
Smp_062900.1	Sjp_0053380		Smp_104370	Sjp_0099980
Smp_062920.1	Sjp_0014810		Smp_104470	Sjp_0010800
Smp_062950.1	Sjp_0070740		Smp_104580	Sjp_0015540
Smp_062970.1	Sjp_0073520		Smp_104600	Sjp_0015510
Smp_062980.1	Sjp_0083380		Smp_104600	Sjp_0096260
Smp_063000.1	Sjp_0012640		Smp_104630	Sjp_0015470
Smp_063040.1	Sjp_0092370		Smp_104710	Sjp_0050720
Smp_063060.1	Sjp_0033050		Smp_104720	Sjp_0050740
Smp_063070.2	Sjp_0033040		Smp_104760	Sjp_0119830
Smp_063090.1	Sjp_0067360		Smp_104790	Sjp_0050800
Smp_063110.1	Sjp_0060630		Smp_104850	Sjp_0099310
Smp_063120.1	Sjp_0060620		Smp_104860	Sjp_0072610
Smp_063150.1	Sjp_0131640		Smp_104960	Sjp_0003850
Smp_063180.1	Sjp_0050860		Smp_104980	Sjp_0048600
Smp_063190.1	Sjp_0050850		Smp_105040	Sjp_0057730
Smp_063230.1	Sjp_0002890		Smp_105070	Sjp_0057720
Smp_063260.1	Sjp_0002930		Smp_105080	Sjp_0120210
Smp_063300.1	Sjp_0011410		Smp_105100	Sjp_0057680
Smp_063330.1	Sjp_0011440		Smp_105180	Sjp_0073170
Smp_063340.1	Sjp_0011450		Smp_105320	Sjp_0075890
Smp_063350.1	Sjp_0011460		Smp_105330	Sjp_0121830
Smp_063390.1	Sjp_0011480		Smp_105330	Sjp_0106280
Smp_063420.1	Sjp_0045680		Smp_105360	Sjp_0050520
Smp_063480.1	Sjp_0057960		Smp_105420	Sjp_0093050
Smp_063520.1	Sjp_0073130		Smp_105610	Sjp_0099550
Smp_063530.1	Sjp_0073140		Smp_105680	Sjp_0055830
Smp_063540.1	Sjp_0039740		Smp_105710	Sjp_0048050
Smp_063560.1	Sjp_0039750		Smp_105860	Sjp_0090120
Smp_063630.1	Sjp_0121270		Smp_105950	Sjp_0041500
Smp_063640.1	Sjp_0064530		Smp_105960	Sjp_0041520
Smp_063650.4	Sjp_0064540		Smp_105970	Sjp_0041530
Smp_063670.1	Sjp_0016640		Smp_106040	Sjp_0087280
Smp_063680.1	Sjp_0016610		Smp_106080	Sjp_0057210
Smp_063760.1	Sjp_0042870		Smp_107200	Sjp_0081060
Smp_063830.1	Sjp_0049430		Smp_110280	Sjp_0047310
Smp_063930.1	Sjp_0084520		Smp_111800	Sjp_0060920
Smp_064010.1	Sjp_0060790		Smp_113620	Sjp_0005120
Smp_064020.2	Sjp_0013410		Smp_113630	Sjp_0082300
Smp_064020.4	Sjp_0064360		Smp_113740	Sjp_0123820
Smp_064030.1	Sjp_0013380		Smp_114160	Sjp_0037710
Smp_064040.1	Sjp_0131810		Smp_114290	Sjp_0086890
Smp_064050.2	Sjp_0013370		Smp_114565	Sjp_0131030
Smp_064150.1	Sjp_0052160		Smp_115340	Sjp_0102940
Smp_064190.1	Sjp_0039020		Smp_115450	Sjp_0133150
Smp_064240.1	Sjp_0000240		Smp_115510	Sjp_0009270
Smp_064260.1	Sjp_0112520		Smp_116760	Sjp_0131440
Smp_064280.1	Sjp_0045770		Smp_117970	Sjp_0070730
Smp_064320.1	Sjp_0036030		Smp_118040	Sjp_0096970
Smp_064330.1	Sjp_0036020		Smp_118200	Sjp_0129800
Smp_064350.1	Sjp_0036000		Smp_118240	Sjp_0038320
Smp_064360.1	Sjp_0035990		Smp_118750	Sjp_0085060
Smp_064380.1	Sjp_0035970		Smp_118820	Sjp_0055200
Smp_064390.1	Sjp_0035960		Smp_118830	Sjp_0004370
Smp_064400.1	Sjp_0035950		Smp_118850	Sjp_0099190
Smp_064430.1	Sjp_0035930		Smp_118860	Sjp_0013520
Smp_064500.1	Sjp_0062460		Smp_119110	Sjp_0032580
Smp_064510.1	Sjp_0006190		Smp_119170	Sjp_0112380
Smp_064520.1	Sjp_0056010		Smp_119920	Sjp_0035120
Smp_064530.1	Sjp_0056020		Smp_119980	Sjp_0032930
Smp_064590.1	Sjp_0034270		Smp_120320	Sjp_0021450
Smp_064600.1	Sjp_0034260		Smp_120350	Sjp_0021490
Smp_064640.1	Sjp_0115760		Smp_120440	Sjp_0090770
Smp_064650.1	Sjp_0078140		Smp_120440	Sjp_0016570
Smp_064750.1	Sjp_0079760		Smp_120630	Sjp_0057810
Smp_064800.1	Sjp_0044880		Smp_120640	Sjp_0078770
Smp_064830.1	Sjp_0058940		Smp_120800	Sjp_0036370
Smp_064860.1	Sjp_0100360		Smp_120960	Sjp_0025350
Smp_064870.1	Sjp_0097700		Smp_121130	Sjp_0108320
Smp_064900.1	Sjp_0028540		Smp_121390	Sjp_0036420
Smp_064950.1	Sjp_0035760		Smp_121420	Sjp_0091180
Smp_065000.1	Sjp_0017670		Smp_121430	Sjp_0091190
Smp_065060.1	Sjp_0017630		Smp_121460	Sjp_0059930
Smp_065110.1	Sjp_0017690		Smp_121600	Sjp_0006420
Smp_065120.1	Sjp_0017580		Smp_121610	Sjp_0006410
Smp_065130.2	Sjp_0017550		Smp_121640	Sjp_0113410
Smp_065150.1	Sjp_0134510		Smp_121660	Sjp_0068570
Smp_065160.1	Sjp_0017500		Smp_121790	Sjp_0015660
Smp_065190.2	Sjp_0095650		Smp_121800	Sjp_0015650
Smp_065210.1	Sjp_0049510		Smp_121810	Sjp_0015640
Smp_065240.1	Sjp_0049540		Smp_121890	Sjp_0112700
Smp_065280.1	Sjp_0049560		Smp_121940	Sjp_0103680
Smp_065290.1	Sjp_0049580		Smp_121950	Sjp_0014750
Smp_065370.1	Sjp_0046110		Smp_122170	Sjp_0004430
Smp_065420.1	Sjp_0046070		Smp_122370	Sjp_0013810
Smp_065470.3	Sjp_0055320		Smp_122410	Sjp_0013740
Smp_065530.1	Sjp_0101080		Smp_122490	Sjp_0031240
Smp_065580.3	Sjp_0008360		Smp_122680	Sjp_0123350
Smp_065610.1	Sjp_0008390		Smp_122730	Sjp_0046820
Smp_065650.1	Sjp_0008430		Smp_122780	Sjp_0056410
Smp_065770.1	Sjp_0085220		Smp_122790	Sjp_0056430
Smp_065810.1	Sjp_0084420		Smp_122820	Sjp_0022380
Smp_065840.1	Sjp_0073920		Smp_122830	Sjp_0042390
Smp_065890.1	Sjp_0115070		Smp_122840	Sjp_0042400
Smp_065980.1	Sjp_0130910		Smp_122890	Sjp_0101160
Smp_066010.2	Sjp_0026290		Smp_122920	Sjp_0089210
Smp_066050.1	Sjp_0026250		Smp_122930	Sjp_0065970
Smp_066150.1	Sjp_0022410		Smp_122940	Sjp_0065940
Smp_066250.1	Sjp_0046730		Smp_122950	Sjp_0006030
Smp_066260.1	Sjp_0046720		Smp_122960	Sjp_0006010
Smp_066290.1	Sjp_0038450		Smp_122970	Sjp_0006000
Smp_066330.2	Sjp_0038430		Smp_123020	Sjp_0005950
Smp_066340.1	Sjp_0014560		Smp_123030	Sjp_0005940
Smp_066410.1	Sjp_0102970		Smp_123040	Sjp_0005920
Smp_066430.1	Sjp_0048550		Smp_123060	Sjp_0044560
Smp_066480.1	Sjp_0090590		Smp_123080	Sjp_0044580
Smp_066520.1	Sjp_0030930		Smp_123110	Sjp_0068050
Smp_066610.1	Sjp_0005890		Smp_123120	Sjp_0095690
Smp_066620.1	Sjp_0005900		Smp_123130	Sjp_0039170
Smp_066630.1	Sjp_0005880		Smp_123165	Sjp_0066740
Smp_066670.1	Sjp_0070580		Smp_123220	Sjp_0062060
Smp_066710.1	Sjp_0092010		Smp_123240	Sjp_0062030
Smp_066720.1	Sjp_0092000		Smp_123250	Sjp_0101440
Smp_066730.1	Sjp_0005860		Smp_123260	Sjp_0022240
Smp_066740.1	Sjp_0005850		Smp_123270	Sjp_0022230
Smp_066760.1	Sjp_0100170		Smp_123280	Sjp_0022220
Smp_066760.3	Sjp_0134180		Smp_123300	Sjp_0104360
Smp_066770.1	Sjp_0082450		Smp_123330	Sjp_0123130
Smp_066820.1	Sjp_0037650		Smp_123340	Sjp_0093190
Smp_066890.1	Sjp_0103750		Smp_123350	Sjp_0093180
Smp_066900.1	Sjp_0103760		Smp_123380	Sjp_0024990
Smp_066930.1	Sjp_0080330		Smp_123380	Sjp_0025000
Smp_066940.1	Sjp_0001920		Smp_123430	Sjp_0024940
Smp_066950.1	Sjp_0001930		Smp_123440	Sjp_0039190
Smp_066960.2	Sjp_0001950		Smp_123450	Sjp_0114240
Smp_066990.1	Sjp_0066500		Smp_123480	Sjp_0039230
Smp_067000.3	Sjp_0066420		Smp_123510	Sjp_0085160
Smp_067010.1	Sjp_0066460		Smp_123520	Sjp_0085140
Smp_067090.1	Sjp_0089430		Smp_123530	Sjp_0085240
Smp_067140.1	Sjp_0068130		Smp_123530	Sjp_0005710
Smp_067250.1	Sjp_0084160		Smp_123570	Sjp_0032540
Smp_067260.1	Sjp_0084180		Smp_123610	Sjp_0032530
Smp_067280.1	Sjp_0084210		Smp_123620	Sjp_0032520
Smp_067400.1	Sjp_0031190		Smp_123650	Sjp_0034300
Smp_067420.1	Sjp_0031090		Smp_123660	Sjp_0049060
Smp_067430.1	Sjp_0052450		Smp_123670	Sjp_0113180
Smp_067480.3	Sjp_0052430		Smp_123690	Sjp_0075980
Smp_067490.1	Sjp_0052420		Smp_123720	Sjp_0095080
Smp_067510.1	Sjp_0105570		Smp_123730	Sjp_0091210
Smp_067520.1	Sjp_0090020		Smp_123740	Sjp_0008330
Smp_067540.1	Sjp_0064510		Smp_123750	Sjp_0057150
Smp_067580.1	Sjp_0064480		Smp_123780	Sjp_0108520
Smp_067590.1	Sjp_0064470		Smp_123790	Sjp_0057990
Smp_067620.1	Sjp_0066850		Smp_123810	Sjp_0074000
Smp_067810.1	Sjp_0055230		Smp_123820	Sjp_0021370
Smp_067900.1	Sjp_0022970		Smp_123880	Sjp_0023510
Smp_067930.1	Sjp_0023010		Smp_123910	Sjp_0023540
Smp_067940.1	Sjp_0023020		Smp_123920	Sjp_0023560
Smp_067980.4	Sjp_0102150		Smp_123930	Sjp_0054930
Smp_068060.1	Sjp_0069910		Smp_123950	Sjp_0023600
Smp_068070.1	Sjp_0069920		Smp_123960	Sjp_0023610
Smp_068080.1	Sjp_0069940		Smp_123960	Sjp_0023620
Smp_068100.1	Sjp_0069960		Smp_124020	Sjp_0094660
[truncated: 5,410 more rows]
