# Supplementary material for: Evolution of gene dosage on the Z-chromosome of schistosome parasites
Source: eLife. 2018 Jul 25;7:e35684. doi: 10.7554/eLife.35684 (PMC6089595; doi:10.7554/eLife.35684)
Supplement: Figure 3—source data 3. [file elife-35684-fig3-data3.xlsx]

## Sheet: Figure 3-source data 3
Figure 3-source data 3: Transcriptomic data, for WormBase Biomart orthologs
Gene_ID_mans	Chrom_loc_GFF_mans	First_Base_GFF_mans	Gene_length_GFF_mans	Loc_cov_mans	WormDBHomolog_ID_jap	Scaffold_ID_GFF_jap	First_Base_GFF_jap	Gene_length_GFF_jap	Strata1_Stringent	Strata2_Exhaustive	Jap_F_Som_1_RPKM	Jap_F_Som_2_RPKM	Jap_F_Som_3_RPKM	Jap_M_Som_1_RPKM	Jap_M_Som_2_RPKM	Jap_M_Som_3_RPKM	Jap_F_Ad_1_RPKM	Jap_F_Ad_2_RPKM	Jap_F_Ad_3_RPKM	Jap_M_Ad_1_RPKM	Jap_M_Ad_2_RPKM	Jap_M_Ad_3_RPKM	Mans_F_Som_1_RPKM	Mans_F_Som_2_RPKM	Mans_M_Som_1_RPKM	Mans_M_Som_2_RPKM	Mans_F_Ad_1_RPKM	Mans_F_Ad_2_RPKM	Mans_F_Ad_3_RPKM	Mans_M_Ad_1_RPKM	Mans_M_Ad_2_RPKM	Mans_M_Ad_3_RPKM	Jap_F_Som_1_TPM	Jap_M_Som_1_TPM	Jap_F_Som_2_TPM	Jap_M_Som_2_TPM	Jap_F_Som_3_TPM	Jap_M_Som_3_TPM	Jap_F_Ad_1_TPM	Jap_M_Ad_1_TPM	Jap_F_Ad_2_TPM	Jap_M_Ad_2_TPM	Jap_F_Ad_3_TPM	Jap_M_Ad_3_TPM	Mans_F_Ad_1_TPM	Mans_F_Ad_2_TPM	Mans_F_Ad_3_TPM	Mans_M_Ad_1_TPM	Mans_M_Ad_2_TPM
Smp_000030	Chr_1.unplaced.SC_0010	2568817	10412	Chr_UP	Sjp_0076480	SJC_S001266	2969	11.357	n.a.	n.a.	48.8891	45.0763	42.0759	54.2074	48.8242	44.8899	38.749	31.5207	38.5973	42.2283	41.5223	41.2507	61.282	46.9211	56.8754	83.5468	61.1471	59.4633	53.6309	65.6412	56.8874	69.7508	120.7	135.661	110.317	116.87	111.039	111.711	102.639	103.649	150.697	100.455	111.084	106.769	77.1379	116.873	129.622	136.101	40.1454
Smp_000050	Chr_1.unplaced.SC_0010	2670818	59471	Chr_UP	Sjp_0078990	SJC_S001377	14658	33.594	n.a.	n.a.	1.44642	1.25083	1.10753	1.51566	1.19406	1.30721	0.418259	0.0361768	0.849384	1.36834	0.875341	0.816207	0.525988	0.5746	0.213987	0.242151	2.72217	0.125095	0.104386	2.13974	0.0709378	1.95268	9.97222	10.7393	8.06995	7.84552	8.16238	9.70676	2.98131	9.17435	0.682837	5.71151	6.6648	5.64742	13.8393	0.800023	1.04669	7.50466	2.11061
Smp_000070	Chr_1.unplaced.SC_0010	2736439	3299	Chr_UP	Sjp_0078980	SJC_S001377	3442	0.658	n.a.	n.a.	59.4055	78.2684	61.1728	54.1458	63.4258	59.0046	110.621	118.413	97.3501	161.216	167.385	184.742	29.0912	31.8512	25.0481	27.5011	17.5601	25.9752	37.7294	23.246	34.7832	22.0006	51.8936	49.7732	65.5005	57.0182	54.5322	53.5924	84.9036	116.871	168.039	127.339	87.2641	142.752	31.5751	26.8561	45.3592	43.0185	38.2114
Smp_000080	Chr_1.unplaced.SC_0010	2774643	9059	Chr_UP	Sjp_0029980	SJC_S000192	27023	2.423	n.a.	n.a.	32.2648	38.7029	45.356	29.2344	38.7126	39.3086	58.7981	91.4545	61.8261	62.0493	63.881	80.1309	3.95884	2.6292	4.76424	3.96259	4.85943	5.59652	5.27665	4.81415	4.1447	5.07831	177.754	173.907	204.674	210.411	270.664	237.962	428.791	395.878	1170.12	443.426	464.992	555.607	572.82	232.582	191.581	197.767	423.537
Smp_000130	Chr_3.unplaced.SC_0044	1169317	16527	Chr_UP	Sjp_0004410	SJC_S000012	414164	11.608	n.a.	n.a.	11.2371	11.6324	12.0681	11.6728	12.4439	17.7756	7.17345	1.98925	5.22984	15.5242	16.8463	13.7229	4.68487	4.37217	1.89716	2.36117	9.81286	3.16767	2.57303	9.47162	3.16527	8.91831	46.0521	51.4435	52.3608	53.1855	55.247	80.7392	33.307	66.2988	16.5642	72.2327	26.6354	63.1053	12.5431	12.8606	11.6161	21.5662	10.2059
Smp_000190	Chr_3.unplaced.SC_0044	685360	12931	Chr_UP	Sjp_0004470	SJC_S000012	905261	5.963	n.a.	n.a.	34.9491	34.6757	37.8591	22.488	20.2831	24.8978	40.9466	45.7442	71.6316	20.3374	18.6274	27.765	8.20309	7.53747	3.40098	4.26457	14.9924	15.2354	13.4183	20.0076	18.1069	19.5673	142.402	87.525	138.581	74.4988	161.038	98.7599	171.234	80.0287	349.492	71.8835	328.385	109.564	40.3333	15.0905	15.8881	20.8898	28.3556
Smp_000230	Chr_3.unplaced.SC_0044	541872	9573	Chr_UP	Sjp_0004500	SJC_S000012	975044	72.375	n.a.	n.a.	1.13388	1.0479	0.929363	0.85081	0.946134	1.0327	0.636529	0.184713	0.82874	1.23227	1.2226	0.883996	3.70106	2.15171	0.755564	1.99966	2.45653	4.20228	3.92334	4.55567	2.11532	4.40906	10.9912	7.98375	9.82231	8.47213	8.98428	9.88075	5.97302	10.4631	3.04933	10.678	8.21726	8.21995	0	4.97547	6.10426	5.56953	2.46222
Smp_000240	Chr_3.unplaced.SC_0044	524523	7257	Chr_UP	Sjp_0004510	SJC_S000012	1049279	5.731	n.a.	n.a.	128.31	104.304	90.3583	119.292	104.708	87.7394	130.284	179.003	116.192	88.0704	89.3741	87.2136	99.3097	87.3302	116.778	133.528	45.3277	88.8842	99.488	78.2114	78.2476	78.6568	340.708	306.135	271.867	267.395	242.385	227.183	308.642	190.56	769.76	194.464	301.623	201.734	67.4589	101.702	111.191	89.8278	108.799
Smp_000260	Chr_3.unplaced.SC_0044	463559	26118	Chr_UP	Sjp_0094720	SJC_S002677	1428	18.135	n.a.	n.a.	80.8705	83.6836	98.8214	91.7713	81.6628	114.365	108.408	40.239	153.851	182.749	189.194	225.536	29.145	21.766	13.8612	23.0988	84.5379	49.4043	55.2745	125.758	53.9175	95.9967	423.049	485.32	441.855	418.708	541.592	614.265	582.189	897.62	386.836	938.138	906.963	1189.92	129.27	201.014	204.241	392.973	100.211
Smp_000300	Chr_3.unplaced.SC_0044	323093	48560	Chr_UP	Sjp_0024880	SJC_S000145	280981	4.55	n.a.	n.a.	0.189855	0.337875	0.465606	0.30828	0.311681	0.287628	0.2025	0.0593565	0.223973	0.575661	0.381899	0.34436	0.396757	0.658501	0.205158	0.241588	0.965598	0.175899	0.0767045	0.93714	0.165066	0.938175	1.51486	1.6641	0.779229	1.12844	2.00327	1.53009	1.13844	2.82454	0.539326	1.54693	0.953488	2.46105	3.41145	1.44603	0.315265	2.77438	0
Smp_000310	Chr_3.unplaced.SC_0044	312288	5297	Chr_UP	Sjp_0024840	SJC_S000145	163079	2.531	n.a.	n.a.	47.7826	46.8711	48.3382	56.2511	53.7099	59.2909	66.0726	80.7229	69.0813	103.384	105.041	121.181	15.5911	16.6115	14.0027	14.4688	24.553	22.7837	21.1541	24.6201	30.9815	20.2791	106.973	130.987	108.536	123.334	118.587	141.835	148.735	216.824	341.533	222.309	169.281	264.082	247.407	59.8481	78.653	50.2564	452.513
Smp_000320	Chr_3.unplaced.SC_0044	253351	27474	Chr_UP	Sjp_0024830	SJC_S000145	121760	4.603	n.a.	n.a.	6.05233	9.79688	8.14059	5.72893	6.646	7.89767	2.97751	1.29081	1.32837	5.63343	4.87848	5.02082	1.6481	1.31437	0.993463	1.06112	1.94677	0.51148	0.519702	2.845	0.660282	2.72305	61.6681	63.9665	89.2327	63.395	89.71	86.5485	34.1302	63.4238	27.1636	58.1165	15.945	54.6842	19.484	10.4118	8.25975	50.8434	16.7732
Smp_000340	Chr_3.unplaced.SC_0044	101035	54956	Chr_UP	Sjp_0024820	SJC_S000145	2386	36.994	n.a.	n.a.	0.198482	0.152373	0.175378	0.14029	0.131433	0.165089	0.177456	0.105856	0.129865	0.269049	0.372154	0.180004	0.051865	0.0512624	0.00993318	0.0268437	0.0808861	0.591626	0.903697	0.118844	0.660186	0.12191	3.76555	2.19557	2.54876	2.14848	2.82521	2.71289	3.04158	4.10085	3.12198	6.10523	2.763	3.13355	0	3.06834	5.80107	1.74474	2.70022
Smp_000410	SC_0113	859598	7364	Chr_UP	Sjp_0102600	SJC_S004051	205	0.62	n.a.	n.a.	5.92149	4.13261	1.92203	17.8728	5.88173	2.81443	2788.09	3922.36	2960.26	3.16846	1.50912	46.1206	0	0.0248416	0.00463308	0	0.116833	165.943	155.114	0.257489	180.402	0.363915	2.23681	9.19156	2.66755	4.10616	1.44405	1.31045	2116.38	2.39124	5258.63	0.948973	2388.93	30.5001	0	745.426	782.995	0	819.33
Smp_000420	SC_0113	830802	1226	Chr_UP	Sjp_0103590	SJC_S004133	2127	0.938	n.a.	n.a.	4.83493	6.82894	2.3997	15.552	4.75165	2.48037	2473.25	4026.46	2344.07	3.21125	2.84999	34.3824	0.0294287	0	0	0	5.61407	2946.85	2848.52	3.09323	3731.83	12.5687	2.7334	9.17293	3.25976	2.50888	1.647	1.99283	1863.36	2.7273	5411.59	1.73175	1937.49	24.5751	0	1815.97	1759	2.52686	463.577
Smp_000440	SC_0113	796224	11961	Chr_UP	Sjp_0084130	SJC_S001753	83775	15.26	n.a.	n.a.	1.51427	1.4104	1.38828	1.88433	1.48692	1.30547	170.049	256.091	213.146	1.41605	1.27884	3.80757	9.38716	7.13932	8.94524	10.8741	7.15705	12.048	11.7298	6.67577	13.0149	7.56171	16.0627	18.2793	13.0071	17.2916	18.4353	16.1295	1333.49	17.1228	3885.34	16.4898	1903.4	37.0012	49.9267	52.2303	70.6969	28.226	116.883
Smp_000460	SC_0113	789025	2571	Chr_UP	Sjp_0084120	SJC_S001753	63992	17.442	n.a.	n.a.	30.3226	28.4544	28.6494	24.6968	26.6454	25.2191	24.4382	17.3576	21.1004	23.5241	23.948	22.922	75.836	29.3007	58.2169	114.212	111.937	101.384	82.8209	70.8013	159.167	76.873	123.73	102.656	115.852	108.565	124.756	107.329	110.119	97.9002	142.672	99.4792	102.892	102.46	53.3058	65.0292	61.7256	39.8043	48.5801
Smp_000580	SC_0113	365430	10563	Chr_UP	Sjp_0013800	SJC_S000059	857064	12.071	n.a.	n.a.	0.966105	0.912728	0.789768	0.650731	0.788822	1.03599	0.572473	0.0111868	0.410058	1.41042	0.930149	0.95188	0.163952	0.277094	0.0839788	0.0399027	1.39822	0.469532	0.264468	1.25656	0.239633	0.676543	4.13697	3.04976	4.6187	3.71637	4.20505	4.75282	2.63061	5.72547	0.103852	3.76418	2.25312	4.60726	0	2.7365	0	4.67504	0
Smp_000590	SC_0113	351639	4186	Chr_UP	Sjp_0013790	SJC_S000059	849148	6.131	n.a.	n.a.	6.12903	6.39405	6.73804	6.42883	6.0801	5.73963	9.24232	4.84553	6.74367	4.3576	4.86172	5.26027	35.5625	40.2227	28.9098	22.9911	19.8681	15.1394	15.3493	16.7097	17.4353	17.7655	33.105	35.493	35.5319	34.4372	37.615	34.2426	53.2558	23.757	51.8185	24.513	43.1408	30.7149	16.137	12.3823	10.7003	4.81959	0
Smp_000640	SC_0113	288908	5367	Chr_UP	Sjp_0013750	SJC_S000059	797928	5.645	n.a.	n.a.	7.34533	7.80694	6.42683	6.11263	5.34745	5.69283	8.40582	9.23364	7.42742	7.56314	7.10352	7.17035	15.4617	23.9003	14.4876	10.9948	14.0801	12.8861	15.6153	15.5058	13.1271	14.2307	116.695	106.804	103.602	74.9768	103.797	88.6236	151.416	120.167	331.971	107.048	159.916	139.729	29.8952	63.6594	65.3489	44.0871	0
Smp_000650	SC_0113	240626	11533	Chr_UP	Sjp_0107880	SJC_S005473	400	3.691	n.a.	n.a.	2.63295	3.40148	3.12094	1.67211	2.74442	2.1274	1.71619	1.60975	1.93269	1.91601	1.41233	1.87488	5.96583	4.19702	2.75121	4.32163	4.06567	3.91816	3.14892	3.56223	5.15774	3.48548	6.91161	4.51841	8.24257	6.3439	4.46205	4.7241	15.3009	7.95715	32.6189	20.5259	37.5287	17.0247	2.46329	8.36383	9.58914	9.36757	4.1475
Smp_000660	SC_0113	206493	15643	Chr_UP	Sjp_0102920	SJC_S004079	40033	9.564	n.a.	n.a.	45.003	52.0267	58.2568	54.5289	57.1937	90.1147	71.5911	64.8636	72.3499	119.789	120.192	138.843	10.123	5.43083	7.05784	14.5635	52.7353	58.9015	59.6666	55.691	70.9551	54.5208	359.168	446.615	425.942	447.584	496.571	726.014	549.246	836.547	907.306	850.288	616.43	1052.01	271.012	370.383	434.78	345.677	291.344
Smp_000700	SC_0113	125481	14155	Chr_UP	Sjp_0013680	SJC_S000059	624922	9.003	n.a.	n.a.	2.95047	2.04909	2.02956	3.02253	2.11527	2.7296	2.36664	1.42491	2.53876	3.50573	3.75621	3.79976	2.84712	3.52556	1.40039	2.13153	4.41676	2.41375	2.5437	6.19174	2.83137	5.64814	10.3295	10.1907	7.05525	6.72295	7.39611	9.17834	8.88716	12.2705	8.86357	12.7725	10.4891	13.1266	9.10201	9.65598	6.95703	15.4481	7.65827
Smp_000740	Chr_1	65357547	5916	Chr_1	Sjp_0102750	SJC_S004068	11331	3.193	Aut_Shared	Aut_Shared	78.0514	76.5536	80.2818	90.3194	84.6411	82.0646	107.128	98.2426	104.502	82.2774	85.5236	91.681	107.349	77.8612	148.819	158.944	49.1549	73.1226	73.4544	65.3488	60.4002	69.7222	191.019	224.396	187.436	195.145	210.139	202.596	333.609	229.444	539.35	237.22	347.151	272.766	39.8098	67.0172	62.0172	79.0383	55.4991
Smp_000755	Chr_1	65280744	71887	Chr_1	Sjp_0031210	SJC_S000200	4018	0.539	Aut_Shared	Aut_Shared	50.8849	49.438	63.6241	40.8571	30.4453	50.4491	52.1372	14.5308	24.849	58.5567	46.8694	37.7901	0.866269	0.292645	0.282391	0.565804	1.33844	1.05405	1.34717	1.79362	1.20893	1.5129	30.4494	23.7839	29.2391	15.2446	37.0179	31.0832	47.7115	47.8031	22.3955	37.3456	23.0057	31.6571	9.97041	7.19055	18.8324	18.4032	0
Smp_000780	Chr_1	65187356	52013	Chr_1	Sjp_0031220	SJC_S000200	32796	95.834	Aut_Shared	Aut_Shared	0.324501	0.398367	0.41587	0.30883	0.374178	0.514375	0.162241	0.0521353	0.173179	0.408602	0.418425	0.318815	0.521637	0.350301	0.218432	0.339675	0.471424	0.286063	0.244675	0.48607	0.364992	0.364955	7.85921	6.5286	8.66794	8.24419	9.95687	12.1976	5.2327	11.6673	2.85852	11.5121	5.82126	10.0433	2.70661	5.7451	3.76501	6.6193	13.6816
Smp_000820	Chr_1	65075124	457	Chr_1	Sjp_0031250	SJC_S000200	214562	0.335	Aut_Shared	Aut_Shared	87.6734	143.79	186.16	119.751	118.532	249.588	259.223	316.428	330.712	366.305	332.366	505.13	104.765	34.185	48.3774	68.6346	426.413	175.451	201.045	769.892	116.315	753.53	45.2773	56.6254	73.9514	57.8201	102.306	121.097	210.82	264.599	459.884	242.034	302.346	387.92	84.0731	47.1088	69.1189	227.185	46.9173
Smp_000870	Chr_1	64920071	42236	Chr_1	Sjp_0031310	SJC_S000200	318641	42.569	Aut_Shared	Aut_Shared	0.400781	0.421329	0.510106	0.369047	0.480676	0.594369	0.30302	0.0793042	0.338572	0.701439	0.63427	0.561307	0.589425	0.746704	0.350583	0.380051	0.947215	0.332711	0.323361	1.11736	0.259701	1.09451	7.35055	6.80759	7.09631	10.1202	9.32136	11.065	4.89148	10.7292	2.78763	10.4989	6.51625	9.69956	19.0771	3.14768	3.53366	18.4151	3.56523
Smp_000880	Chr_1	64899137	649	Chr_1	Sjp_0031320	SJC_S000200	383571	0.365	Aut_Shared	Aut_Shared	1418.83	1639.82	1753.94	1592.9	1644.06	1391.17	2039.02	3392.55	1794.06	1157.5	1134.5	1151.16	1698.02	1916.43	2893.77	2272.69	432.609	1087.29	1042.63	603.157	533.681	767.005	1048.1	1203.03	1171.93	1180.64	1357.97	1020.48	1765.68	924.971	5333.22	912.201	1676.1	958.181	238.844	1489.39	1588.31	853.687	248.39
Smp_000950	Chr_1	64637742	2026	Chr_1	Sjp_0074450	SJC_S001157	4591	1.679	Aut_Shared	Aut_Shared	5.14497	5.79895	4.73163	3.84294	2.77525	1.73213	0.823147	0.160853	1.47404	1.09201	1.27375	1.3998	2.83152	1.13769	1.95345	2.4965	0.353881	16.7281	15.1675	0.207979	14.1596	0.330685	2.4584	2.26192	3.58332	1.50431	2.46883	1.18245	0.604711	0.681365	0.214856	0.811209	1.13004	1.00925	7.99469	4.52506	6.67195	1.44819	4.48969
Smp_000990	Chr_1	64547420	28295	Chr_1	Sjp_0132580	SJC_S026419	114	8.872	Aut_Shared	Aut_Shared	3.96771	3.11902	2.49233	2.67191	3.21975	3.01576	1.81741	0.273969	1.2471	2.58324	2.6516	2.53133	1.55183	0.783586	0.874202	1.22026	3.19777	2.12289	1.46999	3.25388	1.55062	2.4704	27.7054	20.0932	24.5223	24.2377	18.4452	23.5229	16.6513	22.178	5.36296	23.5266	13.7675	25.1916	2.00204	12.74	14.459	19.0204	6.73235
Smp_001020	Chr_1	64461775	10465	Chr_1	Sjp_0031390	SJC_S000200	752197	16.662	Aut_Shared	Aut_Shared	4.04391	2.26051	1.49397	3.63675	2.45611	1.54471	1.82484	0.850965	1.23197	1.02966	0.850345	0.838493	1.1722	1.2586	0.606397	0.674629	1.60315	0.86887	0.177963	1.02674	1.20939	1.4938	30.8942	27.1045	15.4814	18.1039	11.4992	11.2115	13.3668	6.31412	12.3481	5.61849	10.3038	6.25891	6.81942	2.44249	3.936	5.24736	10.9564
Smp_001050	Chr_1	64336438	21166	Chr_1	Sjp_0031420	SJC_S000200	800808	26.086	Aut_Shared	Aut_Shared	0.00827878	0	0.00507578	0.0537712	0.0310654	0.00557433	0	0	0.0725513	0	0.005124	0.0100107	0.0255691	0.0103714	0.00322385	0.0165947	0	0.0260358	0	0	0	0	0.0697247	0.455819	0	0.319988	0.0450133	0.0476569	0.0385891	0	0	0.0414133	0.378591	0.128809	2.82557	0	0	0.767942	0
Smp_001080	Chr_1	64159353	676	Chr_1	Sjp_0097140	SJC_S003045	4905	0.484	Aut_Shared	Aut_Shared	131.629	154.58	147.727	110.707	139.806	168.546	92.8039	93.465	60.4589	167.762	164.595	174.543	80.6988	104.727	66.5705	47.2308	97.787	44.8359	47.2943	124.665	32.4519	134.786	108.308	107.381	163.381	129.038	150.495	175.512	116.711	184.974	242.037	196.825	88.4644	219.523	80.7121	91.3886	68.7295	238.252	0
Smp_001090	Chr_1	64109298	32025	Chr_1	Sjp_0053140	SJC_S000521	69362	21.119	Aut_Shared	Aut_Shared	5.98214	5.62938	5.15358	6.0905	5.45837	4.96435	4.5482	1.65606	5.53544	4.24162	3.70886	3.44369	2.54614	1.68168	1.50748	1.70549	1.74176	1.23895	1.1437	1.30258	1.59397	1.30402	29.9599	30.0197	27.4481	27.0364	26.283	24.267	25.1354	22.0491	16.9805	19.1918	33.5778	19.2079	10.9181	9.26199	12.6314	5.43183	15.2894
Smp_001095	Chr_1	64080993	23035	Chr_1	Sjp_0112000	SJC_S007721	7476	24.621	Aut_Shared	Aut_Shared	2.24547	2.17499	2.00592	2.21046	2.10649	1.98442	1.41269	0.702027	1.49006	1.27128	1.43865	1.3258	1.29219	1.24524	0.647257	0.680072	1.00222	1.05263	0.902827	0.987791	1.37359	1.3379	22.9798	22.758	22.9736	18.8484	19.949	20.1848	16.6689	13.7346	14.6525	15.798	19.4939	15.0542	0	9.41228	5.75884	7.23065	4.98363
Smp_001100	Chr_1	63979857	88120	Chr_1	Sjp_0053130	SJC_S000521	4540	45.041	Aut_Shared	Aut_Shared	1.56309	2.14462	2.29296	1.75642	2.27147	2.33093	0.843826	0.0509672	0.484834	1.50616	1.56097	0.802998	2.70188	1.75751	1.30827	1.23126	2.72563	0.931799	0.56359	2.2498	0.895262	3.11466	42.087	45.3032	54.5184	59.61	65.1162	60.5089	24.6986	42.3969	3.85267	43.4587	16.3231	23.0871	45.1395	30.2473	19.8142	56.782	11.9972
Smp_001120	Chr_1	63968808	3763	Chr_1	Sjp_0032000	SJC_S000207	318004	6.996	Aut_Shared	Aut_Shared	4.44515	5.23724	5.96171	3.58889	5.44418	5.71588	5.92652	5.98359	3.32951	3.76266	3.5728	3.63938	6.35684	6.81565	4.13442	2.95892	2.32446	2.12346	3.87687	3.97515	3.47544	3.38278	41.3491	28.0403	42.3197	42.4844	52.9905	46.6115	54.4792	31.2624	96.4801	30.791	34.7069	32.1135	0	2.51086	3.32781	0	0
Smp_001160	Chr_1	63831768	18685	Chr_1	Sjp_0099020	SJC_S003612	3714	9.125	Aut_Shared	Aut_Shared	1.23068	0.926611	0.478841	0.614871	0.799271	0.780842	0.290297	0.0739924	0.143588	0.660197	1.01072	0.815614	0.279987	0.33679	0.244678	0.214299	0.322317	0.20645	0.0498364	0.22551	0.0451565	0.11952	6.32098	3.75662	5.48233	4.39529	3.09147	3.92764	2.12021	4.30015	0.903984	7.16745	0.891472	5.5438	0	2.18454	0	1.3982	0
Smp_001170	Chr_1	63790748	32431	Chr_1	Sjp_0031930	SJC_S000207	42958	37.832	n.a.	n.a.	3.3965	3.2644	2.70889	4.52703	3.94669	3.00956	3.30611	0.888771	3.89046	3.33015	2.71343	2.83697	8.75875	4.60733	8.7286	12.7291	7.94096	10.3483	9.87728	6.15204	9.23594	7.28548	46.5747	63.3165	45.3622	53.4165	38.365	41.1613	51.3212	46.668	24.4028	39.574	69.6731	43.4655	12.421	44.1117	46.9623	34.535	10.4279
Smp_001210	Chr_2	32496337	23188	Chr_2	Sjp_0046800	SJC_S000412	383309	19.747	Aut_Shared	Aut_Shared	1.57484	1.08992	0.918607	1.40644	1.44658	0.927832	1.32395	0.246179	1.37127	0.749421	0.927333	0.667825	0.928909	0.662689	0.339885	0.474121	0.290644	0.594137	0.522059	0.41795	0.80052	0.211881	7.2006	7.06099	5.46458	7.08981	4.56409	4.74265	9.02097	5.53913	2.39424	5.75428	10.5107	4.63567	0	2.62464	1.14577	1.67941	10.4036
Smp_001390	Chr_2	31748772	14653	Chr_2	Sjp_0056450	SJC_S000588	132405	13.848	Aut_Shared	Aut_Shared	11.899	11.9156	9.78135	12.3372	11.7623	10.2906	5.69706	2.41832	5.61389	10.6677	11.631	10.6168	4.74726	3.11111	2.50536	3.6028	4.63851	1.71118	1.35572	3.52265	2.96547	2.91098	29.1011	30.7278	28.0023	27.7425	25.0228	25.468	15.1843	26.0501	11.2486	28.2144	16.5344	27.6626	2.44449	2.33154	4.74487	3.9765	4.1004
Smp_001410	Chr_2	31577081	11950	Chr_2	Sjp_0042410	SJC_S000338	271572	4.857	Aut_Shared	Aut_Shared	35.3486	34.4478	36.0118	31.4786	30.4911	38.2915	155.317	122.775	145.463	51.312	50.967	55.9969	7.36085	8.69203	4.57667	3.68879	12.6474	15.8174	13.7146	11.5479	13.8036	12.1099	136.42	125.165	134.559	115.652	149.239	145.642	569.309	175.388	820.554	174.547	595.271	202.756	20.8306	14.6359	13.8519	13.9675	8.5902
Smp_001430	Chr_2.unplaced.SC_0193	452499	788	Chr_UP	Sjp_0114790	SJC_S008417	82	1.011	n.a.	n.a.	30.3327	30.919	29.0745	31.633	37.2723	31.0672	20.1636	10.8189	15.2639	21.5033	18.9061	14.2064	188.731	388.525	173.534	124.852	46.4025	60.842	64.6005	57.7507	64.7802	65.4664	21.9302	19.2173	20.5888	20.5572	22.2911	16.584	22.7251	23.7704	19.5436	23.4183	19.5445	16.3779	10.63	86.419	120.41	46.7756	36.7054
Smp_001500	Chr_2	17870429	3817	Chr_2	Sjp_0071720	SJC_S001020	189478	1.64	Aut_Shared	Aut_Shared	174.217	186.855	191.425	187.822	203.828	180.258	261.103	225.527	227.606	227.109	222.421	248.401	90.4496	94.1843	83.4224	74.3988	71.6024	67.7113	70.0976	60.4396	64.6572	68.8632	345.012	366.598	370.659	404.521	394.724	364.853	525.878	416.704	821.117	406.913	498.25	482.234	90.2384	224.787	151.507	123.093	72.1218
Smp_001530	Chr_2	17920211	22207	Chr_2	Sjp_0071710	SJC_S001020	132917	21.986	Aut_Shared	Aut_Shared	5.70695	6.06001	5.9079	6.18846	6.66218	7.56624	6.5847	3.72814	7.09836	8.23209	7.89731	8.04109	4.7961	3.8025	3.13725	4.10604	4.59099	3.42452	2.79549	5.66388	2.24169	5.72209	34.2747	37.1975	37.7875	37.9682	36.8788	45.3919	36.9419	42.8288	38.248	41.9855	43.6558	45.0546	21.5073	13.6855	10.8609	17.5127	9.86088
Smp_001560	Chr_2	18053778	9368	Chr_2	Sjp_0113870	SJC_S008097	16296	6.755	Aut_Shared	Aut_Shared	0.959113	1.55516	1.09767	0.955189	1.46959	1.33465	0.835445	0.139934	0.81897	3.25711	2.47344	2.37751	1.18622	0.917793	0.528086	0.551161	2.78581	0.411776	0.397606	2.36141	0.810604	2.40773	2.25892	2.82508	5.03645	4.23239	3.76867	3.96063	2.71782	9.543	1.15878	7.46661	3.04732	8.4672	3.16236	0.671546	1.76137	3.43967	5.33584
Smp_001610	Chr_2	18215967	3346	Chr_2	Sjp_0065950	SJC_S000831	138281	2.207	Aut_Shared	Aut_Shared	9.88309	12.5383	15.0585	10.3596	14.2283	13.375	8.45395	8.13765	6.7943	14.0635	13.9903	15.5004	6.90107	6.50601	3.79316	3.13872	6.68537	1.64696	1.9481	6.48546	1.26083	5.07248	20.4832	19.8071	25.4454	27.6135	31.544	27.8547	16.178	24.8099	28.4469	25.0925	14.2335	28.249	29.1253	10.8674	4.09291	17.9324	0
Smp_001780	Chr_2	18770571	14543	Chr_2	Sjp_0005930	SJC_S000018	546585	4.731	Aut_Shared	Aut_Shared	5.02127	3.52028	3.19053	2.37189	1.75572	2.82771	1.07114	0.371057	1.07702	1.63323	1.49741	1.76632	1.01469	0.764792	0.46451	0.608632	2.61288	0.68207	0.298808	3.11468	1.59548	1.64309	13.1414	6.26918	8.75375	4.12933	8.48393	7.12101	3.07961	4.15717	1.67622	3.44563	2.9387	4.81174	17.212	3.65608	1.91855	8.42822	0
Smp_001830	Chr_6	1777804	1225	Chr_6	Sjp_0044550	SJC_S000372	72428	0.825	Aut_Shared	Aut_Shared	860.961	885.13	825.095	932.906	814.055	641.223	1411.24	2517.89	1504.88	556.077	583.102	609.8	641.835	642.702	490.659	380.203	351.868	640.146	607.112	301.148	574.782	365.155	1193.52	1276.17	1189.45	1079.29	1192.82	868.06	2167.57	785.546	7109.8	829.185	2535.87	913.429	97.6302	1119.67	985.295	565.412	148.188
Smp_001940	Chr_ZW	37658500	7855	Chr_PSA	Sjp_0035740	SJC_S000251	260604	7.973	n.a.	n.a.	4.87556	5.5917	5.13153	4.09912	4.1164	4.37713	3.84244	2.52356	3.06759	3.99147	3.80558	4.15963	3.57352	5.63589	2.5974	2.25815	7.84963	5.01615	4.58385	9.57528	8.00245	7.76156	40.1846	35.0859	45.6714	37.6265	44.5726	41.6602	39.2561	33.9989	45.5029	34.7605	35.3546	38.364	34.4916	9.43349	15.1541	13.4349	25.0764
Smp_001960	Chr_6	2282022	14106	Chr_6	Sjp_0039180	SJC_S000293	164937	11.009	Aut_Shared	Aut_Shared	4.53146	4.56168	4.0772	4.93083	4.87666	4.23992	3.8708	2.79664	3.23987	3.43794	2.88965	3.39204	7.35609	6.39866	5.22195	5.05476	4.53376	4.43407	3.41072	4.63007	4.99454	4.35373	31.2714	30.8274	27.822	30.3733	26.3838	26.8024	38.735	30.954	48.9992	26.4357	34.9092	32.1967	6.87461	9.11132	8.11062	7.92732	5.77442
Smp_002010	Chr_6	2444113	3219	Chr_6	Sjp_0066750	SJC_S000841	206228	3.905	Aut_Shared	Aut_Shared	9.23569	8.26734	9.08708	11.4585	9.75351	7.89432	20.1735	17.8089	14.5396	6.8416	6.67467	6.8545	18.8076	20.4472	16.5662	12.4392	5.65731	7.53255	12.0533	5.30144	11.7952	6.86826	35.1193	45.5674	30.0529	36.1717	33.9223	30.4175	88.43	28.2406	137.592	26.4324	69.0397	28.0649	581.37	36.4562	40.2534	69.6082	213.373
Smp_002080	Chr_6	2609123	10092	Chr_6	Sjp_0083130	SJC_S001696	27497	15.329	Aut_Shared	Aut_Shared	21.2734	19.0884	18.2946	19.3258	17.3266	13.3279	114.481	179.936	133.92	10.7562	9.862	11.8653	37.5383	28.3971	43.7259	43.881	9.19293	30.1693	31.0028	9.3108	27.8407	11.2414	260.408	234.225	227.271	208.362	228.075	162.363	1364.81	118.131	3900.61	108.842	1768.35	140.671	63.5699	67.5009	61.4048	26.4923	124.725
Smp_002100	Chr_6	3115303	2921	Chr_6	Sjp_0092870	SJC_S002526	15117	5.23	Aut_Shared	Aut_Shared	11.9749	12.7866	10.785	12.0957	12.512	13.6793	18.1456	17.4798	17.8986	35.9084	36.2658	47.2348	25.8523	33.0796	28.126	21.5844	61.0683	21.1299	22.2092	98.5976	20.3643	85.4757	97.8964	101.018	85.272	93.8195	83.3381	116.113	157.496	292.813	258.185	305.552	177.931	403.079	16.0262	21.6	20.9296	122.428	36.2952
Smp_002150	Chr_6	3282737	14756	Chr_6	Sjp_0100980	SJC_S003828	17378	7.431	Aut_Shared	Aut_Shared	41.4134	43.6519	56.5192	52.0222	42.8032	70.9742	46.0936	17.9176	67.7074	84.5593	89.5055	116.074	6.01001	1.29179	2.5711	5.2915	43.0683	10.0834	10.1601	45.4748	11.3788	30.6773	195.658	253.461	208.138	202.291	287.894	346.248	267.912	453.082	188.084	476.071	438.784	663.466	57.0961	41.4729	41.8294	150.318	40.5441
Smp_002160	Chr_6	3301187	18823	Chr_6	Sjp_0100970	SJC_S003828	683	14.094	Aut_Shared	Aut_Shared	4.48959	5.32659	3.85177	4.19986	4.91605	3.79676	3.79167	2.2324	3.0575	2.97347	2.06747	2.279	3.93516	3.39958	2.71523	3.68915	2.74246	3.73277	2.77038	2.10426	3.22743	2.26609	21.9978	22.2484	28.822	24.6275	21.7162	20.4969	25.6051	18.9089	26.1871	13.7102	23.0318	15.3079	5.19872	10.2895	7.21601	7.05286	5.82257
Smp_002180	Chr_6	3382451	2612	Chr_6	Sjp_0102880	SJC_S004076	34335	1.373	Aut_Shared	Aut_Shared	212.5	179.15	169.342	220.873	191.969	170.936	356.337	371.177	335.169	189.911	178.836	200.372	187.015	203.986	148.071	118.309	85.4757	140.722	140.582	106.229	121.62	134.489	449.158	494.523	376.63	409.964	400.975	372.786	749.92	357.817	1394.06	343.895	785.467	406.86	235.267	314.139	322.588	200.6	271.638
Smp_002190	Chr_6	3400717	3611	Chr_6	Sjp_0102870	SJC_S004076	26457	2.888	Aut_Shared	Aut_Shared	42.7733	37.1735	39.7037	47.2091	42.2302	38.1656	56.3497	83.7897	43.8563	28.6141	25.6406	26.2677	23.6501	15.9275	16.7614	21.166	8.41851	10.1486	15.3866	10.6771	8.52861	11.3795	126.296	156.1	118.846	133.431	131.221	117.121	221.528	100.721	601.868	88.8841	187.003	99.8494	5.98618	21.6702	38.5857	31.0617	10.1879
Smp_002230	Chr_6	3519717	12721	Chr_6	Sjp_0022210	SJC_S000122	326509	10.12	Aut_Shared	Aut_Shared	7.55434	5.59536	4.76246	9.73001	6.66635	5.4745	5.82689	2.01487	4.93427	3.26113	3.24916	2.9675	5.40585	4.29113	3.72533	4.81541	4.62157	7.19113	6.2709	5.9457	9.31897	6.09173	36.3362	49.0926	27.6508	32.8221	24.9476	28.305	31.921	15.9363	20.5511	16.1009	29.4381	16.8351	3.88049	12.8866	13.2732	9.46974	8.68076
Smp_002380	Chr_2.unplaced.SC_0171	228111	1092	Chr_UP	Sjp_0025010	SJC_S000146	200770	11.327	n.a.	n.a.	6.02485	8.61839	7.79689	8.235	9.2291	8.29312	9.37482	6.83108	8.68843	10.9492	10.5851	11.5734	105.034	77.8976	83.2017	89.3869	86.0094	50.2124	48.3219	76.9803	55.2454	82.0076	50.5169	69.3791	74.5773	78.5256	69.3027	70.5883	86.6941	93.8044	118.965	88.6834	88.9569	104.238	21.1654	37.1576	29.6121	36.0882	0
Smp_002510	Chr_3	15270298	9925	Chr_3	Sjp_0039210	SJC_S000294	87212	7.909	Aut_Shared	Aut_Shared	28.2886	32.461	32.5618	25.6628	26.2815	24.9493	25.2799	31.0059	19.1067	22.5033	24.1675	21.2801	14.7881	10.8488	13.9875	15.0973	7.23826	18.7948	14.7927	7.76927	13.0494	8.57289	182.474	172.404	215.162	173.314	227.768	163.401	155.982	125.788	356.325	135.227	127.924	132.379	20.6242	84.169	115.12	31.4521	55.8421
Smp_002640	Chr_3	14927124	25591	Chr_3	Sjp_0032510	SJC_S000212	107338	10.309	Aut_Shared	Aut_Shared	2.84902	1.96348	1.33576	1.48309	1.65077	1.00148	0.16758	0.0523954	0.169463	0.978189	1.37438	0.810599	0.335546	0.155834	0.107989	0.229212	1.22151	0.0430678	0.0485167	0.798572	0.181338	0.785394	21.398	10.0297	16.1296	12.0436	10.4258	7.7267	1.67585	8.59897	0.476351	12.2298	2.03562	7.33429	7.21072	0	0.500514	0.489174	0
Smp_002740	Chr_6	3039477	1119	Chr_6	Sjp_0030510	SJC_S000194	184869	0.374	n.a.	n.a.	73.9115	95.9119	90.9854	79.1348	98.0463	100.311	46.4999	43.6881	37.7581	106.101	93.2793	97.4037	123.522	96.9434	124.124	124.081	49.5916	94.3081	95.1442	48.1992	106.317	51.4899	54.1911	65.0867	78.153	67.091	70.7837	82.6933	57.8916	120.425	110.033	98.0582	39.1026	114.858	0	25.6048	16.219	8.60539	0
Smp_002820	Chr_6	2896604	6465	Chr_6	Sjp_0049090	SJC_S000451	95252	5.359	Aut_Shared	Aut_Shared	28.5717	34.9024	26.5851	34.0526	35.4982	28.2195	28.6694	26.5083	26.2424	23.6804	21.3005	18.4684	16.1005	17.7529	13.7158	14.1149	14.9936	23.2704	27.1748	23.4635	26.0368	23.3167	44.8271	52.673	53.9835	54.5239	42.1802	42.8051	50.065	37.4834	82.5321	33.6731	50.2259	30.8521	0	1.72394	7.50888	0	0
Smp_002840	Chr_6	2870277	14514	Chr_6	Sjp_0049100	SJC_S000451	119204	9.466	Aut_Shared	Aut_Shared	10.198	11.3684	9.70741	12.4916	13.3122	11.7515	11.8019	6.70473	8.88937	12.9912	13.1321	12.5659	11.8998	15.3844	7.57394	7.49483	9.76106	8.08728	7.10018	9.62401	5.58081	8.92429	41.8462	49.7083	45.1319	47.7517	37.5182	43.5273	45.5974	45.4221	45.7801	47.3326	37.4533	48.1091	18.1958	31.8503	23.3903	29.6469	26.7917
Smp_002870	Chr_6	2800351	3942	Chr_6	Sjp_0089930	SJC_S002254	9360	5.572	Aut_Shared	Aut_Shared	5.34862	5.01224	4.91892	5.63889	5.74474	5.0628	6.07692	6.95537	4.28492	5.49988	4.98963	5.88173	14.8089	12.901	16.6436	16.3771	13.6045	14.1194	14.1734	12.4529	16.6952	11.8969	21.4824	20.3045	22.2239	23.5189	22.3906	19.9905	37.5305	32.9265	82.757	29.5162	32.9257	39.5272	12.5605	14.2399	24.5419	7.98196	28.3461
Smp_002960	Chr_2	31519167	8426	Chr_2	Sjp_0042380	SJC_S000338	142433	10.632	Aut_Shared	Aut_Shared	5.9515	5.78379	5.24297	5.38272	4.70659	4.6638	6.39122	4.71204	5.08006	4.89017	5.43107	5.84567	5.94762	4.62436	2.97611	3.39738	4.8501	5.98425	5.45203	4.87576	5.70777	4.24064	36.6885	33.0357	34.8377	29.2273	34.7687	29.5242	38.3884	27.8933	51.9447	29.7678	34.5801	36.1484	38.0521	21.6153	26.6817	17.3295	10.8053
Smp_003130	Chr_1	9109478	7590	Chr_1	Sjp_0057980	SJC_S000627	67986	8.261	Aut_Shared	Aut_Shared	1.59467	1.45774	1.25018	1.37534	1.64311	1.53139	1.10139	0.555771	0.986881	0.840218	0.889911	0.790278	6.07032	6.70034	3.42079	3.04503	3.21169	6.38927	5.5618	5.30177	3.66847	5.14907	12.9041	13.9193	20.0057	17.174	13.3291	18.0809	23.9249	17.8273	28.1662	19.9275	21.02	20.6604	25.2544	44.9216	59.3	57.6851	43.3035
Smp_003140	Chr_1	9077774	19834	Chr_1	Sjp_0057970	SJC_S000627	41287	9.537	Aut_Shared	Aut_Shared	2.35502	2.52541	2.83223	2.95625	2.59163	3.43061	2.37904	1.55751	1.63336	4.20202	3.88226	3.55962	2.76318	2.04018	1.89908	3.13275	4.27272	4.89004	4.53843	5.93787	5.08359	5.71987	27.5825	35.8632	31.7975	35.4436	37.988	45.4558	34.7714	54.1598	39.0521	51.1505	23.7726	52.2768	15.4703	33.507	32.7384	32.8091	5.21953
Smp_003190	Chr_1	8860112	5130	Chr_1	Sjp_0099370	SJC_S003631	19054	4.433	Aut_Shared	Aut_Shared	2.28968	3.64132	2.8375	2.11999	1.96515	1.86972	1.40295	1.27939	1.0509	1.74302	2.53278	2.9454	1.02683	1.27661	0.645116	0.383423	1.98458	0.590821	0.363038	1.27313	0.0822367	0.565925	6.75176	6.13042	11.1832	5.85288	9.68632	5.89674	6.02033	6.69351	9.73637	9.8028	4.80081	12.1267	0	0.303499	0	0.388262	2.40292
Smp_003250	Chr_1	8577770	1268	Chr_1	Sjp_0023500	SJC_S000134	78627	6.782	n.a.	n.a.	22.2265	22.0633	22.0613	24.6947	23.121	21.2908	39.5171	53.0029	34.5603	30.0663	28.3412	29.1481	28.5109	45.7911	25.8038	22.2159	27.5929	21.5128	16.6459	34.8923	25.2858	29.9407	219.189	245.553	225.141	225.489	236.159	222.21	448.06	313.315	1096.93	294.744	431.71	333.666	0	53.4599	38.5031	47.7631	101.145
Smp_003270	Chr_7	3595396	11962	Chr_7	Sjp_0042570	SJC_S000339	320623	24.415	Aut_Shared	Aut_Shared	2.76861	3.15883	2.39162	2.62553	3.32745	2.54315	0.726459	0.243358	0.405473	1.31419	1.3632	1.08563	1.52921	0.795231	1.05531	1.26262	1.9899	1.49723	1.34933	1.95501	1.76339	1.38153	26.437	23.935	30.5072	29.328	23.3909	22.0347	10.2631	16.0939	5.94666	16.6061	6.34383	13.6446	84.2919	11.2696	13.3599	12.3275	0
Smp_003330	Chr_1	8385121	656	Chr_1	Sjp_0081490	SJC_S001578	32330	0.318	Aut_Shared	Aut_Shared	10.1868	6.44583	7.49473	4.41093	7.00793	6.85906	3.25959	3.39713	5.03588	7.413	10.0879	6.56955	62.0394	69.2136	40.047	30.5732	33.8809	17.2211	19.3998	29.547	30.8688	29.277	4.39719	2.87463	5.24395	1.34534	6.6238	4.00732	4.05604	8.43728	6.91742	11.3175	9.09558	8.12336	0	14.6157	3.22728	0	0
Smp_003340	Chr_1	8341994	31797	Chr_1	Sjp_0081480	SJC_S001578	593	29.013	Aut_Shared	Aut_Shared	3.87066	3.33822	3.06225	3.63565	3.28891	3.33295	3.05665	1.78726	3.23149	3.16879	3.42765	2.79924	5.12425	4.57492	3.62672	4.89467	2.82754	4.35875	4.1195	3.10754	3.18426	2.79531	31.2475	29.4413	26.4311	27.0251	26.5368	28.2715	25.6378	25.3675	26.6055	27.0167	30.5852	23.8841	7.60996	21.9428	18.582	14.0362	17.8872
Smp_003410	Chr_1	8123302	799	Chr_1	Sjp_0044770	SJC_S000379	21600	0.701	Aut_Shared	Aut_Shared	720.278	679.847	631.246	823.196	769.622	541.198	1590.89	2334.52	1808.88	517.126	562.879	565.864	754.286	691.393	1253.01	1111.23	558.137	1021.45	968.098	486.496	1260.87	578.011	677.31	784.695	635.524	694.999	610.713	484.177	1563.86	470.652	4230.08	513.003	1985	557.097	213.082	660.387	673.289	332.529	466.847
Smp_003630	Chr_1	7090959	5007	Chr_1	Sjp_0000280	SJC_S000000	960885	3.585	Aut_Shared	Aut_Shared	42.8908	44.0973	36.158	43.1171	41.4228	36.0589	49.4742	28.7776	50.9641	33.6084	30.3122	31.2493	36.8867	36.4698	33.5252	33.118	32.9629	27.9554	26.1609	29.4123	35.2194	28.1439	72.4163	73.0563	76.1375	69.4304	64.8524	60.8712	80.2134	49.1168	85.203	45.8874	92.3948	50.3079	20.5416	43.6326	33.3899	56.811	11.5625
Smp_003670	Chr_1	7007233	6385	Chr_1	Sjp_0000220	SJC_S000000	841516	4.35	Aut_Shared	Aut_Shared	13.6527	11.7214	12.7537	14.9296	13.2268	13.1038	14.7208	12.8827	16.332	11.7716	12.1988	12.8769	12.4598	10.5377	6.04346	7.75101	9.97124	3.27969	3.64602	6.7313	7.13585	5.87599	54.5942	61.2091	51.4347	54.1186	59.3883	59.7043	62.9985	45.8825	103.706	50.5853	76.438	55.6395	7.56632	2.56668	2.51933	3.69412	0
Smp_003700	Chr_1	6949663	2500	Chr_1	Sjp_0000200	SJC_S000000	798450	5.653	Aut_Shared	Aut_Shared	5.00456	5.16704	5.03582	5.53328	5.51907	4.63014	9.107	11.3705	8.9621	5.53691	4.77627	6.44418	73.2272	84.7203	105.766	78.5942	36.938	34.4973	36.2544	26.6303	47.9249	25.8161	75.6082	93.7607	83.6609	77.983	71.9594	68.1941	142.36	76.2771	343.953	71.297	137.854	101.759	53.3106	68.0369	63.6738	36.995	123.291
Smp_003710	Chr_5	556817	10101	Chr_5	Sjp_0106720	SJC_S004833	1842	6.355	Aut_Shared	Aut_Shared	103.987	108.133	110.405	98.0437	104.532	116.101	72.0029	48.8722	52.9641	110.005	107.794	109.407	29.3323	23.0075	21.8739	25.3531	38.5702	18.9856	18.4991	31.641	21.1752	30.1124	428.311	420.991	466.004	431.672	492.464	487.811	322.379	456.618	399.716	450.349	266.968	480.963	42.9195	75.3543	69.0665	103.928	0
Smp_003760	Chr_1	6749491	13819	Chr_1	Sjp_0000140	SJC_S000000	616340	15.27	n.a.	n.a.	0.25457	0.117456	0.147408	0.0734865	0.0663369	0.0666591	0.105593	0.0707458	0.276483	0.0514589	0.0612739	0.11116	0.702325	1.0299	0.286395	0.244007	0.0103765	0.019939	0.0449233	0.0457377	0.152643	0.129284	5.2368	2.1397	3.12262	2.40333	2.53561	1.34226	2.53602	2.26087	3.08934	1.55521	11.1708	4.83723	0	0	0	3.20672	0
Smp_003770	Chr_1	6748568	702	Chr_1	Sjp_0000130	SJC_S000000	613092	0.676	n.a.	n.a.	7413.57	2581.17	2692.4	3269.1	2517.13	2199.03	2327.46	2144.2	1553.6	1295.49	1314.5	1413.48	2521.1	1429.12	1721.55	2697.42	1299.73	757.139	892.724	891.351	1009.61	1003.04	5432.38	2375.66	1914.9	1818.07	2056.89	1616.86	1911.83	970.389	3325.17	1027.62	1436.7	1175.35	619.786	523.665	644.976	730.397	377.539
Smp_003860	Chr_1	6318924	4670	Chr_1	Sjp_0000040	SJC_S000000	52867	3.728	Aut_Shared	Aut_Shared	12.4548	10.3781	11.4364	7.90133	10.3253	8.0351	12.0795	7.02709	10.7	9.06342	8.89185	9.52655	12.6472	10.3493	6.64826	6.76914	13.2339	5.31014	5.58317	7.30849	8.22067	9.80324	60.804	42.9557	52.6303	51.7589	58.2483	40.5542	61.6048	42.9044	68.2689	46.3085	66.5632	50.4273	0	19.3367	19.1236	18.6144	0
Smp_003900	Chr_1	6135733	44624	Chr_1	Sjp_0040470	SJC_S000313	57112	1.78	n.a.	n.a.	7.03691	7.77302	6.39718	3.78249	7.17042	3.34938	0.647034	0.0758629	0.163576	1.98652	1.57694	1.02695	0.135832	0.0524729	0.022937	0.060608	0.154241	0.086445	0.0208675	0.118032	0.0661778	0.1101	5.75043	3.38336	6.34345	6.72957	6.12546	2.65304	1.03434	3.06189	0.339235	2.30546	0.33454	1.68203	1.46422	0.620842	0	0.397125	0
Smp_003930	Chr_1	6054346	2816	Chr_1	Sjp_0040540	SJC_S000313	355150	1.967	Aut_Shared	Aut_Shared	11.8575	13.9378	11.4434	10.4826	13.0805	14.2677	6.38218	2.47143	5.10686	9.45437	11.9598	13.0105	3.90777	3.40402	4.03455	2.85635	6.26325	0.684929	0.881811	5.23715	1.19851	4.44107	7.14117	6.24485	8.73754	7.57609	7.00518	8.93794	5.59479	7.90112	4.37692	9.41951	5.53931	10.9082	3.18445	1.3525	0	0.865953	0
Smp_003940	Chr_1	6038131	14113	Chr_1	Sjp_0040530	SJC_S000313	338483	14.418	Aut_Shared	Aut_Shared	0.913689	1.24397	0.973445	0.749105	1.16627	0.695896	1.01449	0.543216	0.959242	0.626747	0.732383	0.642978	1.35749	1.4025	0.858208	1.17471	0.883949	1.50332	1.14367	0.955411	0.956563	1.10767	11.7083	8.18209	14.4445	12.2289	10.4258	8.9685	11.0606	5.92632	12.6233	7.07411	13.623	6.33981	0	19.7442	17.3053	9.84292	0
Smp_003990	Chr_1	5855329	12369	Chr_1	Sjp_0028650	SJC_S000180	181850	1.635	n.a.	n.a.	99.9889	132.577	115.805	120.793	127.132	132.783	107.212	122.895	90.2879	116.225	127.533	136.4	38.2148	35.0516	32.8574	28.8855	56.7705	57.9856	70.6418	85.0465	41.3723	100.422	302.69	388.728	402.893	391.064	385.731	417.7	468.828	434.359	949.529	466.501	433.976	578.181	639.828	419.729	524.326	705.759	538.488
Smp_004000	Chr_1	5832660	10372	Chr_1	Sjp_0028630	SJC_S000180	122081	1.004	Aut_Shared	Aut_Shared	34.8462	38.025	36.0031	36.1845	37.3304	31.2838	58.0449	55.4132	30.8856	29.4797	28.4903	27.9607	3.8125	5.3582	2.8322	2.39761	1.85255	3.0019	1.94522	0.853132	3.09125	1.39953	54.4894	62.6084	60.3876	64.6642	63.604	47.401	109.358	47.2076	176.635	50.6713	63.1866	48.4677	0	3.34527	3.81531	0.931956	5.7212
Smp_004070	Chr_1	5648129	18017	Chr_1	Sjp_0056790	SJC_S000591	195204	18.797	Aut_Shared	Aut_Shared	0.0919126	0.027262	0.147925	0.0298489	0.0431118	0.123775	0.0183814	0.0215517	0	0.090574	0.0782205	0.0833557	0.162205	0.062951	0.15528	0.11892	0.167134	0.0152932	0.017228	0.140323	0	0.0495804	2.44542	0.685146	1.24986	0.961953	3.15746	3.10412	0.580036	2.01096	0.824358	1.86746	0	1.93614	0	0	0	2.1778	0
Smp_004120	Chr_2.unplaced.SC_0120	1016731	28689	Chr_UP	Sjp_0036970	SJC_S000262	60502	33.662	n.a.	n.a.	2.63038	2.89241	2.9068	2.70018	2.91895	3.20959	1.93311	0.657891	1.84671	3.8205	4.09388	4.04176	1.75185	1.25106	0.738516	0.914562	1.83933	0.729925	0.486872	1.88733	0.852895	1.54907	22.4233	24.0827	27.1086	25.6702	26.248	28.3369	18.9903	33.8294	11.5565	36.6622	19.7348	38.921	0	4.49604	4.21089	13.1583	5.10195
Smp_004160	Chr_2	18925582	2977	Chr_2	Sjp_0091450	SJC_S002407	4866	0.658	Aut_Shared	Aut_Shared	8.86159	9.34548	7.6466	6.60834	8.62098	8.39765	6.47624	4.30966	3.9825	9.95159	9.34433	13.4935	1.68461	2.5317	1.73054	1.36863	2.55284	0.185111	0	2.83081	0	2.92562	9.56983	7.39368	8.30012	11.1793	5.05485	7.73026	8.66687	12.0191	11.291	10.3346	4.72384	15.0006	15.6611	0	0	8.68966	0
Smp_004170	Chr_2	18929324	818	Chr_2	Sjp_0091460	SJC_S002407	12165	0.818	Aut_Shared	Aut_Shared	118.277	134.376	117.03	135.466	126.806	122.658	178.108	221.703	166.762	92.2184	100.984	106.467	59.4123	62.8415	36.6205	29.9287	40.3182	38.0632	31.8746	38.3762	56.2155	31.6692	78.2986	88.7242	88.1888	83.845	76.9461	81.3164	125.188	59.0938	279.453	67.5626	125.182	73.7976	14.8869	12.6984	8.37113	2.03721	25.4498
Smp_004200	Chr_2	19006227	28049	Chr_2	Sjp_0060300	SJC_S000681	30929	12.518	Aut_Shared	Aut_Shared	6.34873	5.83346	6.03965	5.65866	6.58694	6.63287	9.41213	7.2491	6.44294	7.68955	8.30732	8.14627	2.08768	2.39616	1.21637	1.14706	2.30561	2.76038	2.30178	2.0055	3.48942	1.48887	56.4712	50.7124	54.4038	57.3664	57.994	59.7516	95.2078	71.3763	126.38	76.7512	74.2016	77.9651	40.4691	6.29875	7.65679	8.87239	31.3126
Smp_004280	Chr_2	19215944	505	Chr_2	Sjp_0060370	SJC_S000681	171600	0.506	Aut_Shared	Aut_Shared	145.112	128.111	143.135	159.118	146.94	152.022	185.504	252.992	128.032	120.61	121.513	124.635	155.964	194.67	244.096	152.808	82.9122	64.9286	108.178	127.244	77.6917	141.069	122.949	120.241	91.0496	115.581	115.221	133.17	173.957	107.588	440.453	108.067	133.441	117.842	92.2463	109.147	136.548	144.95	26.9335
Smp_004350	SC_0037	687013	4929	Chr_UP	Sjp_0011860	SJC_S000048	391171	11.776	n.a.	n.a.	12.5622	12.4238	12.4918	11.8756	12.0599	13.2496	13.0664	11.8111	11.1388	19.0839	19.3868	22.8076	53.6254	51.9964	52.1841	37.8394	27.5207	20.1244	20.3405	34.7505	21.4831	30.9906	204.793	186.423	195.304	180.873	197.341	211.459	214.961	291.135	351.927	301.798	217.285	360.94	24.3222	53.0921	42.6112	51.4859	62.109
Smp_004360	SC_0037	672681	4237	Chr_UP	Sjp_0011890	SJC_S000048	441358	3.215	n.a.	n.a.	48.4315	53.2368	47.2793	47.7302	54.2558	47.4907	72.0407	49.1842	58.1425	58.7398	56.4177	62.8684	48.18	40.9561	28.1431	30.1753	44.6727	23.5413	20.4392	26.901	40.6242	29.938	181.649	184.725	199.187	206.464	199.039	187.536	276.832	197.005	345.812	198.062	255.486	238.129	5.90859	40.2591	56.2907	69.378	10.0535
Smp_004480	SC_0037	305375	11467	Chr_UP	Sjp_0080930	SJC_S001561	39909	9.606	n.a.	n.a.	17.4009	18.0043	18.7184	20.6765	19.1921	18.483	17.337	9.15141	16.8983	17.5735	18.1448	19.3829	23.2141	24.6411	14.4065	16.8561	24.9721	19.0788	20.2474	25.2261	20.0875	25.6099	52.9285	65.0336	56.9964	58.9966	61.6556	58.7093	60.5119	56.7393	56.78	57.5118	64.3787	66.0028	12.2391	31.1389	38.2065	43.1576	7.70589
Smp_004550	SC_0037	121981	7707	Chr_UP	Sjp_0035200	SJC_S000248	33340	2.743	n.a.	n.a.	55.4269	65.2931	67.6274	61.8752	64.4043	61.4409	93.5484	132.378	82.7958	59.6805	56.2824	60.501	37.264	46.741	41.8695	29.6007	16.6705	9.54566	9.46456	17.9328	9.14143	13.2133	239.486	263.035	277.249	267.233	300.738	261.842	417.499	239.926	1080.13	227.018	408.888	259.362	120.66	17.1191	16.0348	27.4832	88.1868
Smp_004680	Chr_2	25703870	3461	Chr_2	Sjp_0014120	SJC_S000061	526699	4.419	Aut_Shared	Aut_Shared	95.5914	81.8704	80.4808	103.129	79.0383	86.5759	72.064	50.4819	55.0506	60.6063	56.5632	62.3745	165.272	141.061	100.442	100.177	117.167	54.8527	57.0392	136.417	72.4049	119.953	218.939	239.446	185.518	178.543	190.053	199.433	189.653	148.139	238.894	136.395	158.442	161.094	136.344	50.9362	61.1149	146.27	146.83
Smp_004710	Chr_2	25807276	26185	Chr_2	Sjp_0014150	SJC_S000061	636055	0.29	Aut_Shared	Aut_Shared	305.323	504.492	672.079	131.561	152.993	321.912	206.118	144.349	72.7913	234.83	305.585	230.073	1.13261	0.709798	0.995461	0.851783	1.37999	0.210454	0.260788	1.21494	0.209447	0.750521	126.053	61.3254	225.49	68.6122	336.867	155.284	177.655	186.464	247.298	259.432	80.7232	203.084	25.8102	2.30086	2.27922	4.02847	13.2495
Smp_004820	Chr_2	26279310	398	Chr_2	Sjp_0016650	SJC_S000080	315743	0.353	n.a.	n.a.	321.799	378.163	406.223	358.814	354.681	355.909	922.355	1926.46	1073.93	419.23	409.703	471.235	291.357	339.484	381.642	292.291	307.322	623.766	652.771	520.885	446.254	441.034	634.238	621.941	657.175	505.795	795.418	547.208	2882.96	1211.98	11236.9	1253.64	3782.52	1485.42	498.446	659.66	696.52	523.809	906.301
Smp_004980	Chr_1	32465706	694	Chr_1	Sjp_0069870	SJC_S000964	53736	0.517	Aut_Shared	Aut_Shared	149.961	121.42	116.528	132.399	157.921	111.379	208.29	380.556	179.655	111.458	116.084	116.679	193.499	180.034	235.532	192.323	69.4236	99.6539	103.317	108.984	44.9837	105.225	117.992	104.507	97.9155	117.283	100.395	91.0536	178.754	94.838	637.046	95.2723	168.709	104.134	187.368	89.0595	58.9258	54.3784	71.8376
Smp_005000	Chr_1	32426944	5372	Chr_1	Sjp_0069860	SJC_S000964	24004	7.909	Aut_Shared	Aut_Shared	8.38283	8.90897	10.6642	9.59472	9.04227	10.296	10.7614	10.0223	7.41811	11.2434	12.202	13.0916	18.4831	16.8768	16.7605	16.516	19.3788	14.6693	15.2541	19.0995	19.633	17.5432	48.8709	57.9814	51.2665	54.4095	71.7188	66.4974	85.0246	79.707	150.292	89.3659	68.7969	104.356	0	40.7281	41.057	42.4799	30.1838
Smp_005010	Chr_ZW	43150487	13729	Chr_PSA	Sjp_0077160	SJC_S001299	11854	12.778	PSA_shared	PSA_shared	10.2251	10.1061	10.0201	9.69292	10.0044	9.58185	9.86056	7.35523	8.59049	8.38376	8.25335	8.73667	8.91676	9.06874	7.75104	8.48878	5.03426	6.86384	6.82788	4.71117	6.60667	5.44927	50.3177	48.9683	51.9381	50.908	53.0948	50.481	55.9603	44.8733	75.6714	44.6598	53.2237	49.8821	58.7831	16.5788	12.8106	17.3655	65.6528
Smp_005020	Chr_ZW	43147408	2375	Chr_PSA	Sjp_0077150	SJC_S001299	9060	2.221	PSA_shared	PSA_shared	20.9057	38.7621	40.5388	22.4832	37.8551	38.4317	36.0917	19.6991	30.9388	47.7623	51.9372	52.2632	83.5225	54.934	44.26	52.2206	54.6402	27.7277	23.0021	45.6849	32.5065	45.6988	11.2611	13.5588	23.4593	23.2235	24.7548	23.8216	25.9553	30.401	24.3024	33.9508	25.0994	35.375	11.2398	10.4927	18.7429	18.3126	7.56494
Smp_005060	Chr_1	32550332	2236	Chr_1	Sjp_0069900	SJC_S000964	101786	3.105	Aut_Shared	Aut_Shared	23.7869	26.1586	29.2958	29.0022	29.557	27.2091	69.3629	107.507	73.3774	26.3191	26.1733	30.4873	22.3965	13.3355	12.0847	15.6457	11.0943	63.4623	52.7509	24.7807	22.2635	25.4684	62.7198	72.6331	69.1878	73.3992	77.3669	69.0499	178.396	61.3765	501.354	59.6044	213.89	79.0388	9.58938	36.1185	36.6577	9.76699	4.03566
Smp_005160	Chr_1	32760045	8661	Chr_1	Sjp_0025260	SJC_S000148	256319	17.845	Aut_Shared	Aut_Shared	8.61663	8.95951	8.94831	7.56163	7.58375	7.82267	9.76494	6.22021	8.90873	8.5425	8.69625	7.44859	15.7549	17.383	10.9787	13.6993	23.5428	8.43059	7.20354	28.4122	11.4468	24.4956	39.0006	33.686	40.9437	33.6276	42.0782	35.9465	45.9496	36.3965	52.3598	37.1336	46.2951	34.4237	26.7569	18.9365	15.7244	42.0259	15.0403
Smp_005260	SC_0137	55040	6878	Chr_UP	Sjp_0037310	SJC_S000266	222866	4.382	n.a.	n.a.	48.2978	42.041	40.278	43.9176	51.3648	38.6593	63.4471	100.799	69.0039	32.9948	31.8452	34.8325	34.5846	22.0276	42.0795	56.3225	17.971	31.7681	28.2508	28.9467	23.5533	32.047	214.185	206.609	178.614	230.479	184.423	180.042	291.135	136.104	840.301	131.104	345.889	153.985	34.304	148.935	175.187	165.382	84.1187
Smp_005280	SC_0137	194822	17089	Chr_UP	Sjp_0037330	SJC_S000266	291604	15.758	n.a.	n.a.	2.80948	2.95928	2.39472	2.6615	2.98271	2.91599	3.22318	1.41395	3.61231	2.9005	3.34204	3.27294	2.29496	2.4728	1.32767	1.45315	1.51876	3.77294	3.65088	1.36847	3.67835	2.20853	16.7672	15.9492	16.2931	16.4485	15.8075	18.1912	19.738	15.9842	16.1195	18.8114	25.1864	19.7218	3.91958	6.23529	16.3298	5.85129	13.1788
Smp_005290	SC_0137	222797	15880	Chr_UP	Sjp_0103070	SJC_S004091	11739	16.323	n.a.	n.a.	12.9394	14.3941	15.2824	14.1788	13.4292	12.445	17.3855	21.3354	13.9937	11.8342	11.2022	10.8468	28.8501	25.59	33.4498	27.5841	9.41805	13.3778	13.2134	9.08803	10.786	10.1536	183.665	204.301	201.377	192.084	229.393	180.235	234.635	144.651	529.472	139.747	211.061	143.901	13.6056	104.152	83.6145	65.4983	23.053
Smp_005320	SC_0137	313759	452	Chr_UP	Sjp_0037360	SJC_S000266	459841	3.237	n.a.	n.a.	49.37	64.2731	69.4144	66.2988	68.2194	61.3632	93.2904	131.574	94.7614	55.1444	58.7183	64.2563	105.685	112.593	95.7116	68.5391	62.8136	38.4045	52.8774	45.2129	51.3342	37.5498	289.463	407.084	400.774	414.731	422.061	370.122	678.716	377.549	1789.26	395.015	788.603	475.627	81.3543	24.525	51.3813	54.2172	28.5872
Smp_005330	SC_0137	316501	28319	Chr_UP	Sjp_0037370	SJC_S000266	468085	19.837	n.a.	n.a.	6.59736	6.01903	5.60011	5.15476	5.33112	4.904	5.82914	3.09051	5.53356	4.96467	4.73018	4.66673	2.51878	3.4831	1.72885	1.79597	0.521539	1.14811	0.712449	0.766282	0.625683	0.607219	51.6979	40.6265	47.1196	40.4809	47.1302	39.5747	45.4919	37.1032	44.8635	34.0424	48.1272	35.5229	8.66718	7.9735	7.23678	3.92637	0
Smp_005350	SC_0137	408268	11897	Chr_UP	Sjp_0074580	SJC_S001163	11101	18.798	n.a.	n.a.	28.4799	40.959	49.4958	23.154	32.0196	41.1993	14.9923	6.16347	7.73684	43.4035	37.5936	36.744	58.1635	39.456	36.9284	31.8265	119.191	9.65781	9.80999	91.3603	13.6169	92.9369	198.789	162.145	296.508	218.576	367.32	292.146	103.356	285.454	78.6151	248.161	58.0898	252.86	95.5989	24.4484	20.4472	138.492	8.25416
Smp_005360	SC_0151	77900	1112	Chr_UP	Sjp_0059290	SJC_S000657	30526	17.435	n.a.	n.a.	1.6598	2.21907	2.30867	1.87452	2.55638	2.95244	1.65145	0.658335	1.6366	3.29004	3.43457	2.79338	10.6746	8.12673	1.74885	6.57002	19.4715	1.48671	6.42009	30.3141	1.51753	20.2838	10.7659	11.8097	14.1447	16.581	16.0211	19.5188	13.1791	24.2113	9.14993	25.4153	13.3757	21.6868	0	1.1026	0	12.7211	0
Smp_005390	SC_0151	187472	24841	Chr_UP	Sjp_0099100	SJC_S003616	11906	11.712	n.a.	n.a.	3.83536	4.11285	3.57245	4.25162	3.21741	3.09149	3.46145	2.85937	2.48604	1.95684	1.97438	1.80604	2.22947	2.38747	1.42015	1.9541	1.71441	1.99657	2.52406	1.94221	2.63236	1.67215	27.8278	30.8587	28.9994	22.5581	27.2836	22.5755	25.6928	14.1473	41.578	13.0528	22.5943	13.613	0	0	0	0	0
Smp_005470	SC_0151	431218	2581	Chr_UP	Sjp_0132000	SJC_S026153	4642	1.059	n.a.	n.a.	2.24321	1.69363	1.75042	6.22528	3.06089	4.25663	0.652533	0.255026	0.687359	2.47333	1.13596	2.34261	0.0279579	0.0425262	0.0925324	0.0136088	6.61129	1.92161	1.80394	18.2848	1.96145	12.1136	5.64807	12.4618	2.52589	6.48017	3.64632	6.27325	1.9537	4.87685	0.83299	2.93536	1.64292	3.91283	72.1788	5.12347	1.6858	18.0701	40.9508
Smp_005520	SC_0049	470030	7366	Chr_UP	Sjp_0008760	SJC_S000029	372325	2.8	n.a.	n.a.	8.94692	7.50364	6.14746	8.9671	8.03136	6.12808	29.4511	44.9477	25.6849	6.73524	5.87169	6.94818	6.90637	6.25342	4.71983	3.60494	5.27551	2.88031	3.07616	5.60601	5.44095	4.85088	21.1622	22.8432	22.3028	20.1015	15.7272	18.1646	80.4875	17.9893	218.038	14.6156	77.1134	18.1837	0	8.38532	12.3988	10.7479	33.4352
Smp_005570	SC_0148	521678	18632	Chr_UP	Sjp_0073150	SJC_S001072	15091	22.595	n.a.	n.a.	3.44084	4.45653	4.19576	3.97305	5.14664	4.64649	4.11857	2.34871	3.41486	3.58779	3.38376	3.25919	3.92902	3.48352	2.5984	3.04077	2.3319	2.60276	2.53222	1.35691	2.44538	1.69002	16.8284	20.1271	22.5694	24.106	22.0489	23.0798	26.4752	20.8668	27.2112	19.7939	24.2239	20.4879	6.88146	4.77147	5.80254	2.53571	4.21277
Smp_005640	SC_0148	310069	11765	Chr_UP	Sjp_0038390	SJC_S000280	107529	12.89	n.a.	n.a.	2.8817	3.35931	3.06107	2.58989	3.3163	3.02331	2.80559	1.31998	1.88614	2.71273	2.53019	2.10694	0.73294	0.398054	0.289996	0.51649	1.07255	0.819703	0.791494	0.626766	0.573735	0.702332	17.1878	15.53	18.1646	19.6238	20.298	18.9113	23.0468	21.1553	19.29	19.5046	17.5597	18.1567	0	1.96081	1.28807	2.51283	0
Smp_005780	Chr_1	38655503	5243	Chr_1	Sjp_0040810	SJC_S000316	60582	3.333	Aut_Shared	Aut_Shared	15.6155	13.8374	15.2548	18.3488	16.594	13.6555	28.1624	46.6731	29.4834	13.3203	13.9159	15.8266	8.73949	8.24824	7.28172	9.56657	4.97758	3.36341	3.37453	3.6969	3.70136	4.51501	76.9857	87.1937	65.4955	81.0139	76.9257	65.3559	182.101	80.4458	549.622	87.9571	221.37	101.157	0	26.7079	57.813	34.4279	0
Smp_005880	Chr_1	38290494	20544	Chr_1	Sjp_0015800	SJC_S000073	378400	7.258	Aut_Shared	Aut_Shared	19.8167	22.1697	26.5981	26.032	24.5635	30.6531	57.2686	47.6477	53.736	33.0565	33.5911	33.1372	5.65852	2.72655	7.71242	8.06642	5.78624	1.79721	2.38721	3.26116	1.84816	8.92464	55.8514	77.9263	64.1445	71.8093	81.514	92.0943	231.652	119.969	341.92	125.335	228.585	132.354	0.934834	2.69453	5.21269	3.01797	5.23239
Smp_005900	Chr_1	38165217	20779	Chr_1	Sjp_0015770	SJC_S000073	272642	10.764	Aut_Shared	Aut_Shared	28.4697	26.7314	29.0547	26.2839	26.6887	27.4235	23.4538	10.6508	15.3103	25.8179	28.7967	28.7244	10.3105	8.51149	6.61376	5.6374	13.6499	7.12082	6.18435	14.8134	6.05027	18.0988	203.397	185.704	188.684	177.951	216.913	193.329	174.651	178.464	148.277	192.676	121.921	203.387	45.925	34.1376	29.4693	52.5186	15.0098
Smp_006040	Chr_1	37885529	16062	Chr_1	Sjp_0074460	SJC_S001157	38844	12.142	n.a.	n.a.	6.66983	7.61786	8.7566	8.24831	6.54064	8.79035	10.8798	13.9574	10.0836	10.2898	9.78651	9.94705	7.90239	9.53734	5.59712	3.61915	9.21313	4.71752	4.98584	9.07687	6.96032	6.06205	145.953	172.681	147.571	133.236	183.329	174.036	371.84	302.73	875.992	304.826	355.638	319.945	40.8787	52.6603	73.8459	101.703	71.2207
Smp_006060	Chr_1	37730255	1424	Chr_1	Sjp_0069550	SJC_S000961	49248	1.175	Aut_Shared	Aut_Shared	62.8582	69.1254	73.2463	83.8023	83.1062	86.9997	60.3795	53.8995	45.7191	65.5372	62.7939	66.0072	219.594	122.144	165.103	206.651	250.937	104.681	96.1273	228.437	121.467	189.291	30.9169	40.5136	33.4139	40.1591	35.4639	42.2636	52.6315	55.8537	93.9625	54.9258	46.4648	57.7109	54.8597	58.292	52.4697	108.811	33.135
Smp_006230	Chr_ZW	12587764	5292	Chr_Z	Sjp_0092180	SJC_S002477	32557	7.297	S0	S0	5.23845	4.98609	6.15128	10.5917	9.96723	11.8569	7.21305	5.32964	5.02766	10.7326	12.7675	12.1856	5.15423	2.91754	7.13693	11.0311	12.4913	7.39348	6.62791	12.5805	6.6167	10.761	25.4978	50.7901	24.8977	48.2205	32.0383	57.5469	40.7252	56.9368	55.1201	67.998	32.2559	67.9698	39.2432	23.6899	53.2232	28.6038	44.6014
Smp_006240	Chr_ZW	12595611	651	Chr_Z	Sjp_0092150	SJC_S002477	404	6.727	n.a.	n.a.	4.23766	5.06578	4.44833	7.88183	7.83026	8.36546	5.92382	4.71733	5.99471	9.28636	10.531	9.2973	12.2482	7.98052	14.7268	23.4702	15.8591	11.8511	13.3504	21.3596	16.201	28.8158	32.8008	64.9253	49.4397	68.576	37.3517	71.9288	61.2683	89.9485	76.3255	94.705	65.3746	87.8082	122.399	56.889	101.73	110.68	120.406
Smp_006300	Chr_ZW	12746277	2952	Chr_Z	Sjp_0079860	SJC_S001448	12108	0.216	S0	S0	27.9948	32.0277	25.7458	46.7558	49.7103	53.8563	29.3262	18.1298	27.6337	97.0096	97.7732	85.2331	2.63997	1.71036	2.69292	4.30725	8.69488	4.48028	3.89048	12.0615	2.28658	10.9694	0	0	0	0	0	0	44.4952	132.225	40.6526	143.255	44.5443	127.306	0	9.31362	8.25938	39.9993	0
Smp_006340	Chr_ZW	14159051	8352	Chr_Z	Sjp_0095270	SJC_S002744	16477	0.492	S1_mans	S1_mans	122.465	117.175	119.22	115.749	103.767	110.832	237.835	427.614	216.303	139.481	146.433	139.593	11.2403	9.37886	27.7005	24.3709	17.1515	6.59811	11.1865	18.1876	12.9815	16.4176	110.471	102.396	103.293	81.8794	104.467	97.1315	238.82	125.391	766.133	138.315	228.509	132.543	26.1599	13.4655	14.4857	29.3672	19.1154
Smp_006390	SC_0138	259963	542	Chr_UP	Sjp_0066340	SJC_S000836	236020	0.375	n.a.	n.a.	309.255	351.878	348.142	394.993	401.944	488.196	558.047	941.651	502.357	497.31	507.925	567.891	809.329	999.79	827.456	672.741	592.355	1062.5	969.562	1306.47	485.7	1236.93	252.051	313.075	279.547	356.276	312.425	413.466	555.899	503.462	1964.23	548.677	603.157	627.061	1103.57	1457.36	1146.01	1899.7	1208.23
Smp_006590	Chr_1	24473811	10897	Chr_1	Sjp_0022420	SJC_S000124	207907	8.003	Aut_Shared	Aut_Shared	21.7498	21.5146	20.8132	20.1208	19.6695	17.9516	22.0184	12.3849	15.6806	14.7114	14.9314	13.5742	4.46319	5.1202	2.29186	2.69468	1.76329	1.11257	1.53817	1.64339	1.50987	1.51655	80.7586	75.8319	79.9604	71.864	80.3486	68.01	88.9174	52.8997	91.3663	54.8375	69.7883	53.8204	0	3.10904	3.05986	0.995554	6.18213
Smp_006630	Chr_1	24386225	16443	Chr_1	Sjp_0022560	SJC_S000125	135212	11.181	Aut_Shared	Aut_Shared	13.4818	12.9474	10.6342	14.5524	14.2237	9.76696	17.4597	3.97342	19.2574	10.4129	9.76692	9.03864	7.2585	6.53724	5.81394	8.01688	7.0288	8.29477	6.75803	5.31737	8.56936	5.52772	29.63	32.7264	27.6756	30.3152	24.2922	22.5465	38.4624	20.7536	15.7439	19.568	46.8351	19.471	10.617	0.000170092	16.3926	9.19304	15.6819
Smp_006690	Chr_1	24172195	11502	Chr_1	Sjp_0091520	SJC_S002423	12910	7.825	Aut_Shared	Aut_Shared	2.73228	2.68501	2.75812	2.25862	2.89973	2.19279	3.72377	1.39782	2.73491	2.24269	1.75942	1.65194	3.61361	3.2986	2.4442	2.29032	6.49518	5.5577	6.44975	7.30851	7.77581	7.4169	26.4134	23.6293	25.1999	27.3062	26.5655	23.5647	30.9297	16.9651	25.5874	13.8718	29.1153	15.2381	50.3868	42.9019	31.3528	45.8416	47.5844
Smp_006700	Chr_1	24140075	31466	Chr_1	Sjp_0091530	SJC_S002423	27507	13.662	Aut_Shared	Aut_Shared	8.66244	7.46423	7.02642	6.67353	7.54793	6.748	6.89582	2.31287	7.38463	7.82212	7.41603	5.73429	2.87917	2.31501	2.02435	3.06079	2.00511	1.87393	1.20347	1.61363	2.73509	1.66076	36.6164	28.9727	32.1474	31.9313	32.3194	28.9532	28.2487	29.2684	17.2501	28.1063	32.2	22.7895	2.07868	1.12774	0.615011	0	5.22729
Smp_006710	Chr_1	24122767	3396	Chr_1	Sjp_0033100	SJC_S000218	249040	2.504	Aut_Shared	Aut_Shared	36.2234	43.0788	41.2978	25.6559	34.9521	35.9465	48.433	36.024	42.6748	36.9249	36.5122	41.2984	11.5803	15.4815	7.32392	8.19154	10.0493	9.65516	12.9789	14.0207	6.45979	14.5331	76.6599	51.0215	90.0453	64.2169	88.5465	76.8597	112.842	74.1673	151.473	75.7047	109.614	93.8455	9.45725	12.0497	13.1685	13.7152	0
Smp_006740	Chr_1	24028902	18135	Chr_1	Sjp_0044460	SJC_S000371	122096	9.457	Aut_Shared	Aut_Shared	49.3486	43.81	47.4772	59.4768	41.1099	55.1849	27.2555	13.565	28.079	40.5754	34.0769	35.4003	35.9463	30.611	26.5814	37.8436	64.3627	24.0972	23.4317	57.9828	32.7775	65.3774	115.104	139.637	105.387	95.0231	116.375	130.55	64.8497	88.7306	58.4669	74.5788	73.4495	82.9013	24.4999	23.1058	27.0009	51.3253	13.266
Smp_006780	Chr_1	45183581	1278	Chr_1	Sjp_0120450	SJC_S013119	245	0.62	Aut_Shared	Aut_Shared	187.398	178.529	212.278	201.804	196.058	163.237	289.788	473.497	259.466	109.629	152.636	130.57	130.909	123.502	167.76	149.21	53.2954	88.1805	86.2215	62.8093	73.2833	79.1589	108.006	115.312	98.6992	121.132	136.36	96.9735	232.737	87.0042	677.499	115.205	236.464	110.194	0	57.3675	71.6466	33.7425	14.9839
Smp_006830	Chr_1	45359357	1135	Chr_1	Sjp_0070400	SJC_S000970	123370	0.816	Aut_Shared	Aut_Shared	185.789	185.886	193.905	167.771	179.752	158.064	306.42	279.174	248.347	182.963	177.892	194.255	150.231	152.858	138.787	131.894	131.517	102.446	119.51	115.829	119.686	124.549	170.884	155.982	170.866	153.114	184.243	144.411	270.217	152.068	459.473	149.312	250.002	175.742	0	77.8602	72.296	73.2933	51.0983
Smp_006840	Chr_1	45375672	7647	Chr_1	Sjp_0070390	SJC_S000970	114852	0.42	Aut_Shared	Aut_Shared	106.952	129.331	114.122	140.601	137.956	120.484	237.748	301.259	216.294	167.446	164.853	226.321	10.5781	9.83206	10.7703	9.5447	8.85071	9.58453	10.8783	10.0561	11.3647	10.8347	80.9085	101.974	104.312	120.426	83.2912	96.6524	252.133	158.183	595.984	167.98	254.431	253.157	32.801	7.76043	7.09853	6.98786	23.7815
Smp_006850	Chr_1	45385821	564	Chr_1	Sjp_0070380	SJC_S000970	109842	0.47	Aut_Shared	Aut_Shared	94.6549	84.4987	84.2333	102.067	89.6582	80.7501	134.776	172.674	105.005	54.3357	64.5572	56.395	311.859	408.422	318.193	198.041	94.0697	141.188	156.85	96.3763	121.925	88.2995	58.9958	69.6817	52.0284	55.9701	53.1297	55.5722	131.428	43.9484	304.749	54.4753	101.138	50.3729	59.711	120.286	162.862	92.1779	41.3983
Smp_007000	Chr_2	36765	3546	Chr_2	Sjp_0020280	SJC_S000109	146168	6.207	Aut_Shared	Aut_Shared	5.56688	4.45819	2.9438	6.68909	3.85145	2.81125	11.4114	13.162	11.1409	1.89893	2.23959	2.18773	6.29817	6.93353	6.75433	5.48756	0.849195	2.1757	2.5385	0.356486	2.37944	0.0629787	34.5605	41.5561	26.8638	24.3577	20.3197	19.193	77.3639	10.6576	166.019	13.3794	83.5359	15.7717	0	6.51548	8.61911	0	0
Smp_007170	Chr_1	30218404	19279	Chr_1	Sjp_0047290	SJC_S000417	79211	15.273	Aut_Shared	Aut_Shared	7.4942	8.03577	8.04515	8.81665	9.25881	9.04481	11.9976	7.36496	8.5407	9.79243	10.7208	9.40397	7.91061	7.50181	5.76744	6.56611	7.76503	5.34524	4.41148	5.78097	6.95866	5.28218	66.4073	72.2077	66.7503	76.6262	72.4444	77.9959	95.5581	74.4246	105.854	80.4958	74.4285	70.604	20.2856	7.03663	5.31855	4.86478	18.6046
Smp_007180	Chr_1	30184280	19178	Chr_1	Sjp_0087090	SJC_S001931	2786	14.583	Aut_Shared	Aut_Shared	7.99688	9.59317	8.58924	8.74327	9.22456	8.15655	7.41593	5.48182	6.44904	6.53782	6.26939	6.08842	9.07917	5.85678	7.25839	11.2417	6.57971	7.02564	6.11796	6.02014	7.39127	6.83545	28.9594	30.6691	33.8069	31.9887	33.1214	29.4438	28.9789	23.1654	39.5457	22.4499	27.8529	23.0702	25.7566	20.2371	22.2811	23.0135	22.8931
Smp_007300	Chr_1	29907574	643	Chr_1	Sjp_0037740	SJC_S000270	324759	0.43	Aut_Shared	Aut_Shared	1452.96	1492.05	1541.46	1474.11	1638.18	1337.79	2228.98	4211.24	2150.56	1277.04	1172.83	1370.07	1287.59	1195.3	2174.58	1722.68	638.466	739.622	772.856	716.584	703.998	825.217	1314.05	1345.31	1291.65	1409.54	1396.13	1198.68	2239.73	1207.29	8079.46	1097.02	2447.51	1387.37	586.87	881.813	957.578	871.8	746.69
Smp_007330	Chr_1	29834741	21501	Chr_1	Sjp_0106320	SJC_S004777	10866	2.034	Aut_Shared	Aut_Shared	5.94581	3.90505	4.036	4.96522	3.28691	4.28944	4.41663	0.995841	6.72801	7.79082	7.68867	8.92291	1.96331	1.37492	0.569665	0.901755	1.59392	0.820166	1.03942	1.79317	0.902573	1.95268	16.1172	12.6438	12.1732	10.8485	11.4456	15.4226	12.4881	19.1739	5.70482	22.3368	22.0867	30.4366	0	4.12803	1.96517	5.28191	0
Smp_007380	Chr_1	29755071	6143	Chr_1	Sjp_0113220	SJC_S007937	488	6.708	Aut_Shared	Aut_Shared	14.8416	14.4383	13.8763	12.9227	14.074	13.0931	14.6111	13.0446	11.6544	10.8745	10.1026	12.9052	31.704	31.3873	23.7321	20.9385	22.6889	16.9996	18.5945	23.7331	24.5859	21.6306	80.8648	71.8674	79.7559	74.022	81.9764	71.1057	89.1464	56.7391	143.372	53.6119	76.9662	73.2143	3.02197	16.6582	15.5124	20.0821	7.61026
Smp_007500	Chr_3	14401734	1593	Chr_3	Sjp_0094400	SJC_S002634	3530	0.911	Aut_Shared	Aut_Shared	155.51	169.315	158.278	137.188	157.226	172.707	195.072	243.687	161.403	225.555	221.258	232.904	124.388	124.115	113.598	103.168	125.3	106.202	99.9585	136.091	120.762	141.592	95.0633	90.3456	113.37	103.399	114.768	114.352	139.065	141.144	311.532	142.153	125.714	166.336	36.3981	84.2892	72.0459	89.1421	49.2029
Smp_007540	SC_0170	270903	1901	Chr_UP	Sjp_0022800	SJC_S000128	135701	2.713	n.a.	n.a.	54.7662	59.1209	54.7587	61.4219	61.0094	53.0622	80.9133	132.149	64.6617	56.9131	49.0218	57.5604	41.4508	30.9092	58.2034	52.1784	12.5968	29.8583	25.7984	15.0725	29.7376	18.7962	128.516	147.028	144.594	144.866	137.321	129.837	203.906	133.512	615.099	115.195	185.368	143.982	7.97625	47.6505	80.8294	43.6962	27.3163
Smp_007550	SC_0170	247034	16463	Chr_UP	Sjp_0022850	SJC_S000128	242878	20.703	n.a.	n.a.	12.0691	11.881	11.3265	13.2456	13.1128	12.432	20.4053	17.0173	18.1495	15.688	15.2433	16.4166	12.4196	7.98717	8.14248	12.3105	7.13349	7.34744	5.26033	7.47366	9.22521	6.79612	87.2969	98.7804	88.8512	97.9979	88.4583	95.5231	149.174	105.18	228.115	102.984	145.228	117.721	11.0667	17.603	12.2918	21.5233	6.19946
Smp_007570	SC_0170	223426	1121	Chr_UP	Sjp_0022870	SJC_S000128	282035	1.313	n.a.	n.a.	0.493435	0.195142	0.302529	1.17513	1.08008	0.442992	0.5263	0.102845	0	0.498717	0.610805	0.497219	0.804631	0.424289	0.304353	0.375996	0.25583	4.17853	2.49204	1.31559	4.13971	0.199217	0.45608	0.795089	0.181302	0.837235	0.196293	0.311731	0.504834	0.43756	0.17937	0.270891	0.117925	0.561707	0	2.18478	4.30841	0	0
Smp_007630	Chr_ZW	8666816	2605	Chr_Z	Sjp_0053490	SJC_S000529	307114	2.47	S1_mans	S1_mans	98.3625	80.9122	77.3535	92.7355	89.5674	74.531	153.174	249.789	152.42	75.5556	75.5448	88.4386	72.0485	57.3028	171.533	155.545	82.843	55.1074	55.2877	102.39	48.0985	115.305	298.613	282.774	239.952	265.982	243.874	227.196	440.207	196.073	1292.92	197.069	478.843	238.808	43.7818	33.7414	25.0654	55.0291	65.6509
Smp_007660	Chr_ZW	8584617	12534	Chr_Z	Sjp_0053470	SJC_S000529	259832	17.895	S1_mans	S1_mans	4.99623	5.39791	5.7343	5.19683	5.79646	5.80998	4.98789	2.95049	3.25415	4.33982	4.70571	4.69891	6.67246	6.19412	5.98031	7.04224	8.66031	8.52947	9.70766	9.76598	9.32337	10.9398	45.552	45.8142	46.6404	51.2515	54.2183	50.9129	47.3562	41.4467	50.4109	45.7197	33.2298	47.0531	44.5949	23.9862	30.6212	29.903	30.0806
Smp_007670	Chr_ZW	8568689	3537	Chr_Z	Sjp_0053460	SJC_S000529	234030	2.354	S1_mans	S1_mans	1.83484	1.52383	1.57493	1.60884	2.32371	1.85317	0.636039	0.114729	0.556603	1.44649	1.93058	0.776541	0.48963	0.331008	0.472655	0.744791	2.59461	29.0572	30.1007	2.91871	49.8568	1.51534	1.79968	1.59671	1.37973	1.88784	1.65979	1.58154	0.782598	1.47995	0	1.9088	0.697994	0.949922	0	16.9211	16.8133	2.00439	7.44352
Smp_007710	Chr_ZW	8457061	24397	Chr_Z	Sjp_0053430	SJC_S000529	111006	4.769	S1_mans	S1_mans	1.26796	1.12826	1.02727	1.00002	0.764662	1.12817	0.531303	0.0849461	0.396849	1.12591	0.840834	0.71185	0.0532388	0.0569864	0.0251721	0.0921407	0.270364	0.0451756	0.190842	0.267704	0.138336	0.466838	6.38332	4.43385	4.75784	2.19712	4.89367	5.72645	3.97445	8.95652	0.470713	7.5828	3.71359	5.40491	0	0.975002	1.28093	1.24947	7.76982
Smp_007890	Chr_1	63638052	2788	Chr_1	Sjp_0031910	SJC_S000207	23562	2.407	Aut_Shared	Aut_Shared	17.0471	12.8803	13.0922	14.7435	13.1302	11.2367	20.575	19.0745	13.6087	13.0582	13.9384	15.0261	27.1374	27.6238	22.9819	21.833	14.8639	17.8882	18.2587	15.4158	9.23039	18.183	64.4138	58.2456	46.665	46.9668	51.3007	38.6779	86.6257	46.7818	150.578	54.3491	64.4407	62.2793	67.3302	81.6977	109.938	71.0676	38.8204
Smp_007900	Chr_1	63634011	2003	Chr_1	Sjp_0031920	SJC_S000207	29631	6.124	Aut_Shared	Aut_Shared	71.7987	67.6118	67.1115	83.1893	74.3679	53.2592	149.852	325.418	182.739	48.7583	48.8037	57.2469	491.371	577.99	738.86	483.832	107.026	497.838	502.246	187.753	292.763	263.014	890.355	1026.77	853.611	878.555	865.117	671.102	2018.05	609.896	7918.83	606.421	2759.28	763.292	435.788	2815.99	2922.26	944.925	982.232
Smp_007970	Chr_4	16030526	3012	Chr_4	Sjp_0060260	SJC_S000680	326039	0.85	n.a.	n.a.	125.003	116.958	130.07	137.792	131.566	131.384	162.189	127.887	158.942	105.541	104.887	110.293	16.3628	19.7753	13.0718	14.8917	15.9484	19.2108	19.4771	14.6191	28.8533	15.5703	108.096	117.779	99.9396	108.738	117.895	110.64	162.255	95.0648	249.28	99.0628	179.767	109.766	17.3777	36.9976	25.9628	22.1407	19.7051
Smp_008120	Chr_1	41176829	13314	Chr_1	Sjp_0057440	SJC_S000616	139798	3.965	Aut_Shared	Aut_Shared	14.9239	15.1859	17.7656	13.3369	15.9928	16.0265	18.0673	17.3691	15.1274	12.188	11.8326	13.4357	8.01318	6.90295	6.29366	7.13883	4.51266	3.82863	3.10071	3.48132	5.83032	3.55598	32.6683	31.679	36.1455	36.4817	44.0552	35.8502	56.752	35.4162	99.1438	33.9561	52.5109	40.7931	105.321	16.7942	20.8329	15.5419	141.211
Smp_008140	Chr_1	41104892	5659	Chr_1	Sjp_0057420	SJC_S000616	109234	1.624	Aut_Shared	Aut_Shared	29.1227	23.6658	24.9486	30.23	25.3241	25.3396	55.3875	67.6843	46.8841	31.2892	29.3832	31.758	9.4423	11.0297	5.92046	4.12753	4.02888	3.79783	2.13916	4.1325	3.72746	2.48619	82.7924	93.9893	83.9548	75.5369	89.9363	74.2092	139.111	67.9203	321.127	75.9709	147.285	84.8708	5.26632	4.28399	4.26932	7.66457	0
Smp_008190	Chr_1	40923822	24140	Chr_1	Sjp_0088780	SJC_S002152	16768	1.118	Aut_Shared	Aut_Shared	7.5335	7.10454	8.40866	5.26944	4.34904	5.20257	3.09048	0.241567	1.95326	5.62274	5.85829	5.95622	0.0119568	0.0151561	0.00989337	0.0101852	0.0475204	0.0456565	0.0128582	0.130913	0	0.231279	5.25021	3.97422	3.29539	3.29719	5.70858	4.34401	4.74093	7.79413	0.978081	7.54978	3.85817	9.01858	0	0	0	24.4785	0
Smp_008220	Chr_1	40796108	23132	Chr_1	Sjp_0054730	SJC_S000554	115645	3.169	n.a.	n.a.	1.49925	1.21279	0.793856	1.15082	0.575367	1.14714	1.49008	0.894843	1.47007	0.826526	1.18101	0.865246	1.52853	1.86318	0.533923	0.704552	0.427723	0.869541	0.657508	0.418962	1.07602	0.395825	4.05557	3.31411	4.83654	2.32653	2.61822	5.54397	8.69764	4.37725	7.17749	5.11875	7.86461	4.37048	2.80659	10.7242	7.02892	1.52552	18.9218
Smp_008310	Chr_1	40550909	6117	Chr_1	Sjp_0101030	SJC_S003835	5907	2.358	Aut_Shared	Aut_Shared	74.1848	84.864	94.7849	84.1724	81.7933	89.9729	121.815	178.216	104.402	100.527	101.184	125.863	47.7051	43.3574	53.924	52.8846	40.6713	44.6841	42.8274	37.1631	45.7255	41.9483	269.041	322.238	330.998	289	379.496	346.303	504.667	399.043	1362.4	395.412	509.795	530.482	105.827	143.001	111.045	112.595	62.9035
Smp_008430	Chr_1	31239572	8685	Chr_1	Sjp_0058630	SJC_S000638	161779	3.279	Aut_Shared	Aut_Shared	23.0516	23.6765	24.9146	24.426	22.5515	22.4836	38.3556	51.7247	31.3009	36.4252	37.3397	39.7802	30.9948	32.1129	26.8741	20.8602	15.6849	16.5608	17.012	20.0373	18.4585	17.6395	93.2663	103.653	110.763	94.5227	120.423	101.996	157.651	132.429	408.986	141.491	134.14	167.993	211.586	144.941	147.249	140.759	148.933
Smp_008440	Chr_1	31247968	3582	Chr_1	Sjp_0058640	SJC_S000638	166277	0.203	Aut_Shared	Aut_Shared	297.876	323.117	349.606	333.74	343.31	328.789	502.672	919.309	527.11	248.378	331.198	324.816	35.435	37.363	50.8246	30.094	12.0895	14.1538	14.4713	11.4693	12.8376	11.3469	103.679	96.8278	132.476	95.1631	138.649	101.236	1483.72	686.338	4604.74	818.145	1573.98	975.926	8.75208	8.04038	5.26102	3.56058	12.2428
Smp_008470	Chr_1	31218455	14697	Chr_1	Sjp_0058650	SJC_S000638	180258	14.344	Aut_Shared	Aut_Shared	5.51042	5.10872	4.8831	5.90641	5.09872	5.57561	5.12268	2.70185	4.9529	5.9346	5.87997	6.6359	8.02997	7.3985	5.46696	6.34279	9.32731	4.21827	5.23771	9.90556	8.35309	9.46655	45.1118	48.2225	41.0034	38.9443	42.1111	47.6676	38.0579	41.268	35.3878	40.6984	40.7616	48.3518	18.2736	16.284	29.6214	30.1462	0
Smp_008500	Chr_1	31102488	13242	Chr_1	Sjp_0083960	SJC_S001738	10130	9.25	Aut_Shared	Aut_Shared	15.3624	14.4869	13.7989	14.1026	14.2582	13.2679	12.6004	5.28465	11.1115	13.068	12.8896	12.0407	14.9337	9.96589	9.52532	11.9256	11.5433	13.3586	12.4	12.2986	13.094	14.1664	48.8418	43.8972	44.6028	44.1782	45.1834	42.9832	43.5386	39.8335	31.8388	40.6794	41.7418	40.1833	0	20.7042	12.2699	9.35656	0
Smp_008545	Chr_4.unplaced.SC_0032	188514	2970	Chr_UP	Sjp_0082590	SJC_S001658	21814	8.587	n.a.	n.a.	117.7	142.09	144.449	160.523	156.752	118.893	268.65	267.084	299.727	154.77	146.88	162.653	692.073	405.238	1100.62	1415.81	265.156	767.329	590.905	271.902	450.425	530.335	378.987	517.127	456.032	488.986	481.749	386.258	911.323	476.821	1643.88	457.539	1122.97	538.941	363.397	1302.99	990.391	449.644	657.574
Smp_008610	Chr_4.unplaced.SC_0032	43204	15215	Chr_UP	Sjp_0086440	SJC_S001876	26070	19.495	n.a.	n.a.	4.65264	5.44118	6.92088	2.77729	1.21587	2.5062	3.45605	3.94822	6.60144	2.86849	2.41344	4.03865	4.05022	3.26311	1.17501	3.94759	15.522	23.5787	24.0321	29.6742	24.5943	22.4717	66.8929	41.2318	80.7873	20.0763	108.443	37.5932	64.8764	47.4296	133.044	42.1278	134.085	74.2774	17.4163	96.2718	130.09	106.751	73.7332
Smp_008770	Chr_4	8680946	3433	Chr_4	Sjp_0053720	SJC_S000533	27711	1.154	Aut_Shared	Aut_Shared	58.575	55.2853	56.795	49.835	63.2006	55.317	99.7026	110.814	78.8467	62.5308	65.674	65.2849	42.3749	40.8497	37.0299	34.3877	19.8402	20.5469	21.6998	17.6745	20.6452	20.9467	145.274	139.504	150.868	162.689	179.048	155.831	264.287	154.046	556.034	177.527	239.392	164.794	0	14.5677	12.9843	16.4118	4.626
Smp_008860	Chr_4	7471977	5666	Chr_4	Sjp_0124540	SJC_S017650	20	1.79	Aut_Shared	Aut_Shared	4.70528	6.29819	5.39983	9.56013	10.7521	10.9668	2.89539	2.33861	3.25324	11.4135	9.03543	11.2334	6.24676	7.21274	5.40734	4.11003	5.06151	0.680819	0.547825	3.16062	0.670114	3.42906	16.6978	36.8122	21.2064	38.0835	23.0731	40.1591	29.9346	87.8592	34.9673	77.4529	24.713	88.9704	0	0	7.81707	37.878	0
Smp_008900	Chr_4	7630941	17204	Chr_4	Sjp_0052980	SJC_S000515	74637	17.441	Aut_Shared	Aut_Shared	69.0563	62.1273	60.4147	74.6415	67.1051	64.0143	57.7412	28.6858	53.3967	65.1699	59.5938	58.8204	44.2397	38.3667	31.9584	50.063	42.1827	33.1849	29.4989	41.8574	32.516	42.9277	227.693	247.363	205.233	215.786	206.616	212.156	204.125	210.758	188.486	196.275	211.009	203.466	87.7082	80.3726	82.8047	89.0072	45.1121
Smp_009020	Chr_4	8012011	3719	Chr_4	Sjp_0134320	SJC_S027883	29	0.982	Aut_Shared	Aut_Shared	7.91708	4.95745	4.17985	5.5707	7.63334	5.77502	0.820982	0	0.296502	3.33409	3.81121	2.26037	2.29924	1.90853	2.26597	1.95502	1.46516	0	0.0834626	0.509854	0.226875	0.420344	10.9068	9.07483	7.68601	8.64579	6.0811	7.45481	1.3719	5.42221	0	6.7726	0.384557	4.57936	3.38661	0	0	0.921212	0
Smp_009030	Chr_4	8062178	7585	Chr_4	Sjp_0068740	SJC_S000919	40135	6.928	Aut_Shared	Aut_Shared	39.3392	31.0292	25.113	41.6065	33.0149	21.6817	28.7265	19.121	28.0112	13.5727	11.6725	11.7792	48.8181	27.5426	42.2236	59.584	9.47129	32.6939	31.0602	9.77725	37.5432	11.8654	71.0358	75.4044	54.634	57.6862	46.8314	39.4597	54.9407	23.183	65.2741	20.9172	60.4715	21.5012	19.0529	79.9395	76.4652	23.5644	121.063
Smp_009150	Chr_4	8337452	13234	Chr_4	Sjp_0091870	SJC_S002462	1367	25.435	Aut_Shared	Aut_Shared	1.20568	1.29949	1.23375	0.981624	1.06733	1.16055	1.50333	1.07774	1.2077	1.17396	1.17715	1.17043	8.53599	10.9036	7.87081	6.81307	2.69796	3.95588	3.40091	2.70637	3.15593	4.13435	13.9197	10.4812	15.4145	13.3468	15.5657	13.3368	23.6619	16.7408	32.4068	17.4212	20.0522	18.2915	7.02846	9.61753	14.2001	7.95565	5.9297
Smp_009250	Chr_6	18463786	11442	Chr_6	Sjp_0093650	SJC_S002569	11550	6.215	Aut_Shared	Aut_Shared	11.4322	12.203	10.8652	12.2551	11.3439	11.6049	9.85865	4.36722	9.06524	10.4518	10.0652	10.0002	13.8744	11.5337	8.78146	10.1456	16.8683	8.64515	8.59954	16.3693	13.8634	14.0333	48.5006	53.5378	52.9096	47.4359	50.2008	51.3014	55.8855	61.1466	49.9067	58.2755	57.6037	59.8312	17.745	21.6476	22.1916	39.7513	18.6597
Smp_009300	Chr_6	18218145	17115	Chr_6	Sjp_0117500	SJC_S009413	1693	0.602	Aut_Shared	Aut_Shared	97.9355	54.9047	44.8688	86.2109	47.7877	28.0196	15.6879	4.03762	17.8955	16.9686	15.9865	12.7967	2.33996	1.92607	1.20604	1.21699	2.18671	0.660066	1.01562	2.17884	1.898	1.64409	59.2558	55.0082	33.0387	30.9428	28.444	15.9698	13.6701	11.7203	6.30104	13.2828	17.088	10.6882	7.40321	6.29178	5.1605	6.04428	0
Smp_009320	Chr_6	18147547	4678	Chr_6	Sjp_0074960	SJC_S001180	34965	2.455	Aut_Shared	Aut_Shared	62.6329	69.2999	68.981	70.8479	76.2509	74.5125	92.6068	132.121	85.6892	76.1772	82.5399	85.3623	15.2633	13.4131	18.9698	15.8052	22.3151	18.4948	26.342	26.842	17.766	31.6031	271.402	344.811	281.935	355.647	331.694	338.924	524.781	390.572	1342.29	449.131	522.997	479.314	104.69	0	8.75899	0	40.2021
Smp_009390	Chr_6	17955470	532	Chr_6	Sjp_0058260	SJC_S000632	15142	0.46	Aut_Shared	Aut_Shared	203.754	217.232	205.518	195.765	216.246	213.376	340.258	334.948	241.161	207.548	235.366	242.122	167.987	224.266	156.481	98.5726	77.0871	71.9919	65.3468	79.9962	75.3347	72.6218	281.644	269.488	294.149	296.894	295.329	299.839	438.341	272.664	832.764	297.055	351.533	314.287	0	0	8.05286	9.09668	55.2885
Smp_009400	Chr_6	17926232	20554	Chr_6	Sjp_0058270	SJC_S000632	16700	38.815	Aut_Shared	Aut_Shared	5.87541	6.18524	5.4682	5.72417	6.08066	5.58196	6.03826	4.5818	4.76336	4.47734	4.04971	3.93576	9.14191	7.0418	9.13288	12.6184	5.85319	8.15056	6.7806	6.8779	8.21006	6.94284	47.415	47.224	51.4969	48.5105	48.4475	45.6274	51.1765	34.4251	70.5597	31.9738	44.695	33.0949	4.70154	33.8929	31.3129	29.3331	36.8416
Smp_009520	Chr_1	54091250	17410	Chr_1	Sjp_0066020	SJC_S000832	105404	15.08	Aut_Shared	Aut_Shared	3.23654	2.53164	2.35312	2.26028	2.39135	2.00568	2.22248	1.2626	1.51568	1.67612	1.66638	1.59316	4.18201	5.39029	2.79254	2.73772	1.77079	2.16821	2.21076	1.64577	2.27778	1.59058	25.8576	17.4959	20.1982	18.275	20.2824	16.5249	20.2499	12.9496	22.5762	12.7474	14.1405	13.2958	5.22974	9.43478	9.45529	4.97314	4.40474
Smp_009530	Chr_1	54109722	4424	Chr_1	Sjp_0066070	SJC_S000832	295483	1.272	Aut_Shared	Aut_Shared	21.3923	14.906	15.0935	21.1724	17.3606	16.2331	29.2457	26.7524	29.1852	15.6497	15.1318	17.2451	13.8316	15.4071	10.8817	8.01889	3.3709	3.11412	5.82346	3.85744	3.81441	4.69462	44.043	42.3004	30.477	39.9262	30.5397	32.3333	58.381	32.8646	103.287	29.0661	68.7488	37.8363	0	5.73551	9.19138	4.89579	15.1857
Smp_009540	Chr_1	54132947	27119	Chr_1	Sjp_0066030	SJC_S000832	139042	19.074	Aut_Shared	Aut_Shared	10.6203	10.7733	10.3571	8.22161	10.5683	11.7784	4.63128	2.0106	3.97654	9.79098	11.4155	7.72165	3.39523	2.91005	1.01276	1.74074	3.08792	1.42244	1.84277	3.75235	1.54008	4.02687	41.4845	31.6102	41.3368	40.9349	42.3898	45.9747	18.4995	35.7936	14.0463	42.2904	17.7588	30.0012	5.90244	6.67712	8.74354	13.3507	3.30772
Smp_009560	Chr_1	54244465	5522	Chr_1	Sjp_0105420	SJC_S004469	191	14.653	Aut_Shared	Aut_Shared	4.11198	3.33982	3.36145	2.95794	3.35973	3.21528	1.67417	1.01371	2.41429	2.37741	2.38084	2.05839	5.14863	9.54754	2.76182	2.14995	4.33658	3.24338	2.07981	5.79932	2.44476	4.04423	26.3253	18.7348	21.4596	20.2887	21.7281	21.8654	13.832	17.7753	14.8092	18.6709	21.7126	16.5531	11.0006	10.5362	7.69896	19.5131	0
Smp_009690	SC_0187	76180	1382	Chr_newZ	Sjp_0116280	SJC_S008728	7876	1.399	n.a.	S0	538.125	530.026	499.436	1080.23	1026.29	790.775	930.761	1470.82	898.054	714.82	779.153	777.446	1079.07	826.696	2111.49	1812.03	515.882	893.801	767.683	556.435	670.359	709.235	529.21	1082.97	520.359	989.678	524.987	799.974	1008.36	708.478	2928.73	791.916	1082.57	834.02	420.057	985.012	924.453	575.264	623.643
Smp_009710	SC_0187	137555	29716	Chr_newZ	Sjp_0109510	SJC_S006070	285	8.355	n.a.	S0	4.34247	4.38537	4.70674	7.13509	7.85639	7.67525	2.9913	2.06877	2.80536	5.784	5.53536	5.51659	2.15997	1.67814	2.33301	3.16067	4.74823	1.25177	1.50415	5.47339	1.63264	5.19302	25.8401	42.6234	26.5304	46.8069	28.2821	47.9557	22.2568	38.2205	23.0172	37.3024	21.2385	37.9366	2.71419	0.557158	1.04886	3.97947	0
Smp_009830	Chr_1.unplaced.SC_0010	3485447	5979	Chr_UP	Sjp_0030160	SJC_S000192	703004	6.237	n.a.	n.a.	17.2782	15.6518	16.0918	21.59	18.1252	17.5557	52.4248	97.342	56.1603	18.0371	19.395	21.479	25.4712	23.7486	33.1023	29.9547	11.8954	42.0288	35.5096	13.0378	33.8685	15.6501	159.543	208.088	151.465	166.228	157.915	159.687	449.524	143.964	1500.82	148.312	516.611	177.424	55.2328	224.196	215.692	48.0035	189.877
Smp_010090	Chr_3	12107755	8075	Chr_3	Sjp_0076120	SJC_S001251	2874	3.101	Aut_Shared	Aut_Shared	70.5475	77.007	80.9129	68.0756	77.2872	77.8407	102.433	78.9053	89.5749	101.78	104.225	110.906	19.9544	18.4225	21.4384	19.7566	18.9651	26.0694	22.6408	24.421	16.3525	26.3009	211.337	216.129	235.479	218.94	250.194	233.907	337.095	300.382	465.939	312.633	310.062	346.81	160.747	145.579	169.206	164.805	148.511
Smp_010100	Chr_3	12066221	21222	Chr_3	Sjp_0092570	SJC_S002508	30684	13.21	Aut_Shared	Aut_Shared	2.95903	3.99559	3.52818	2.80322	3.17462	3.12619	3.76641	2.73957	2.67802	2.74616	3.17719	3.19258	3.04149	3.30663	2.2845	2.00762	3.79732	3.53153	3.39328	4.7156	3.10114	4.95641	31.1657	28.7637	42.5115	34.7756	37.6102	35.0853	37.9921	27.4378	51.6718	30.4887	30.179	34.4951	6.85141	5.49819	9.34939	9.18281	3.94954
Smp_010110	Chr_3	12048477	14861	Chr_3	Sjp_0092560	SJC_S002508	26315	2.563	Aut_Shared	Aut_Shared	20.8124	20.4938	20.7677	19.1547	20.3146	21.9565	30.9163	48.5245	28.8552	24.8845	22.4773	26.8985	6.94838	8.63891	7.20195	7.10239	3.90782	3.63403	3.21655	3.26069	3.20784	4.02735	81.2471	72.6637	75.361	83.3773	86.6916	82.1418	129.902	101.008	360.807	93.8332	128.233	113.614	7.87769e-06	6.02666	6.31908	6.13726	27.3302
Smp_010140	Chr_3	12005432	2634	Chr_3	Sjp_0092550	SJC_S002508	19668	0.986	Aut_Shared	Aut_Shared	130.978	126.552	128.915	130.309	125.953	115.769	165.516	143.253	147.945	122.595	120.922	117.063	44.2708	50.5464	29.7658	28.7502	35.0588	30.0225	28.1644	31.5145	37.7989	29.929	112.866	112.06	116.2	107.281	115.711	104.881	142.712	98.3065	230.422	94.6558	144.767	100.61	0.0209617	0.00446376	0.00396798	0.00350326	0.0354324
Smp_010160	Chr_3	11955485	8342	Chr_3	Sjp_0056120	SJC_S000584	197997	6.806	Aut_Shared	Aut_Shared	18.4356	17.9574	16.9837	18.9606	18.4554	15.5539	34.6904	45.1178	29.262	24.5724	25.0597	26.6473	35.9542	40.6963	35.5045	28.358	10.7948	14.0708	11.8325	13.3603	9.00187	13.7602	158.546	164.964	149.669	149.812	150.193	130.04	302.959	194.826	724.619	209.353	280.399	229.18	27.2167	117.575	88.9577	82.9721	0
Smp_010250	Chr_1.unplaced.SC_0010	2979089	21875	Chr_UP	Sjp_0108970	SJC_S005783	817	12.68	n.a.	n.a.	14.7323	18.9135	18.6811	11.8475	15.0187	15.9403	7.4662	2.75823	5.95878	11.7949	12.7129	10.5238	5.44122	2.77976	3.03982	5.04506	4.54924	3.48909	3.61835	6.37587	3.25928	6.20709	48.0645	38.4837	61.735	47.2915	62.5297	52.4307	26.0303	36.9601	17.4711	40.6234	22.5016	34.6806	2.19195	15.8111	14.6189	34.5193	7.3752
Smp_010280	Chr_1.unplaced.SC_0010	3057546	28247	Chr_UP	Sjp_0030080	SJC_S000192	296256	2.961	n.a.	n.a.	6.85588	4.58621	6.79697	2.55807	2.73682	4.51803	1.75033	1.50496	2.2125	8.13819	7.58381	8.37834	4.13459	3.46866	3.45685	2.92713	1.20818	1.66803	1.83511	1.73039	1.23962	1.38356	36.7766	10.9667	16.9279	13.0286	34.5724	23.3729	8.57011	44.9397	20.5537	46.7531	19.5185	54.4323	16.6285	44.8323	43.4519	37.818	37.6824
Smp_010290	SC_0201	95493	13347	Chr_UP	Sjp_0057850	SJC_S000623	62796	5.892	n.a.	n.a.	55.6028	57.0107	49.911	53.6121	51.7829	50.5191	55.5336	44.3703	46.3285	53.1231	58.1663	56.1104	16.695	7.81241	18.3256	29.69	20.5844	21.4699	20.6513	19.4472	33.0937	20.8481	199.351	197.656	204.659	180.784	187.65	182.613	202.665	185.654	308.337	205.357	193.447	209.477	49.4955	98.1128	105.71	105.002	128.108
Smp_010400	Chr_7	986172	1781	Chr_7	Sjp_0043270	SJC_S000353	45660	1.588	Aut_Shared	Aut_Shared	21.6232	22.7502	24.3468	18.9909	23.6018	24.0827	35.7555	71.3446	30.8034	26.9678	29.8809	32.5602	52.7318	47.4744	75.0749	57.9423	14.6533	17.6369	15.6854	13.3673	15.6337	15.1724	120.506	82.719	122.155	138.26	128.366	131.786	290.12	202.901	1048.58	209.358	268.741	231.899	15.2311	6.48097	25.5593	13.8461	0
Smp_010450	Chr_7	1138996	5830	Chr_7	Sjp_0044700	SJC_S000377	79790	2.961	Aut_Shared	Aut_Shared	3.57381	3.02863	2.95132	2.88967	2.3263	3.7814	6.88465	3.10113	5.21167	4.86522	2.93421	4.18917	0.334185	0.282402	0.286755	0.271114	1.67251	0.0945239	0	0.903443	0.0723626	0.957644	16.043	12.7556	15.5127	11.9393	14.8359	18.0781	36.4758	22.9625	28.1369	13.3918	28.2519	17.6224	0	2.76584	3.67074	7.11957	0
Smp_010470	Chr_7	1216218	2630	Chr_7	Sjp_0044690	SJC_S000377	31538	1.654	Aut_Shared	Aut_Shared	0.130568	0.309821	0.0800525	0.254415	0.244973	0.0879153	0	0	0	0.237539	0.161626	0.0789418	0	0	0	0	0	0	0	0	0	0	0	0	0	0	0	0	2.49291	2.59284	5.31445	2.67536	0	0	0	0	0	0	0
Smp_010620	Chr_7	2131536	9042	Chr_7	Sjp_0028430	SJC_S000176	231911	7.697	Aut_Shared	Aut_Shared	10.8864	12.6829	11.646	10.1506	11.0812	11.3163	10.1301	8.19304	7.11174	10.9405	10.1243	10.28	4.49699	6.34866	4.69019	4.9101	3.67918	3.32156	5.52687	4.38049	3.21935	4.74208	73.1922	67.3839	81.648	70.9992	83.8813	76.7856	67.5136	66.3009	101.976	62.2324	53.2533	68.7139	8.36555	7.54214	6.39151	13.6264	0
Smp_010710	Chr_7	2490147	20406	Chr_7	Sjp_0049230	SJC_S000455	135951	15.198	Aut_Shared	Aut_Shared	22.4799	23.1136	23.3398	20.4522	20.262	18.5042	21.6431	21.8396	17.3668	19.1559	19.4455	20.0777	12.8346	9.69443	13.8405	15.1214	8.89617	10.3161	9.79594	10.4175	7.83546	12.3338	167.319	158.547	183.673	153.369	192.6	146.653	166.985	134.672	305.698	135.275	145.005	150.873	18.0254	23.4001	28.7485	20.9024	8.03838
Smp_010820	Chr_7	3021122	9642	Chr_7	Sjp_0065470	SJC_S000818	16713	2.333	Aut_Shared	Aut_Shared	7.77568	11.7513	11.067	6.97429	9.89953	12.715	3.15946	1.56278	2.12165	6.62393	5.61471	5.48471	0.931739	0.265616	0.750157	0.764998	3.10818	0.342921	0.611652	3.47424	0.962584	2.50143	25.2051	26.3642	34.5677	33.5455	38.2395	50.8219	36.2694	79.7995	37.1732	74.1051	22.484	53.5485	0	0	0	14.0155	0
Smp_010900	Chr_7	3440674	736	Chr_7	Sjp_0013180	SJC_S000057	631600	0.339	Aut_Shared	Aut_Shared	75.172	86.9189	83.1937	103.442	105.779	80.6414	202.825	277.242	171.349	102.375	105.276	97.0607	204.909	229.313	229.369	198.577	79.6843	73.7511	66.2125	61.8309	62.4786	77.6774	77.2309	91.3611	89.1792	95.6414	82.3073	84.6275	198.791	92.4421	488.874	99.7526	186.377	85.3037	29.0566	72.4563	52.002	53.2046	66.6924
Smp_010930	Chr_7	3511639	27834	Chr_7	Sjp_0042590	SJC_S000339	362757	18.969	Aut_Shared	Aut_Shared	9.69994	9.29309	8.38318	10.7147	9.56947	8.32502	8.53059	3.34582	8.19665	9.12025	9.06881	9.01027	7.03212	4.09324	3.76188	5.9651	6.75389	4.00922	3.43473	4.37504	7.15401	3.79506	59.3329	66.2929	55.1224	55.7542	53.1442	50.5367	60.6696	58.9458	42.4922	58.7023	63.0815	61.7299	18.7135	13.4013	16.9065	16.5173	15.7483
Smp_010940	Chr_7	3547632	2582	Chr_UP	Sjp_0042580	SJC_S000339	353126	3.467	n.a.	n.a.	252.898	234.494	229.831	199.215	201.833	158.959	240.675	215.933	174.053	180.145	186.444	189.622	752.251	529.459	689.998	743.692	366.923	337.218	332.998	500.597	229.237	509.525	554.028	456.327	525.867	452.932	553.992	363.422	634.012	430.561	1047.87	456.543	503.979	493.615	184.907	383.716	371.353	480.602	123.384
Smp_011010	Chr_6	15505674	7703	Chr_6	Sjp_0115740	SJC_S008561	4513	6.157	Aut_Shared	Aut_Shared	3.08665	3.28756	3.26877	3.57674	4.01435	3.11749	4.41458	3.53107	3.23937	2.31849	2.40974	1.65412	11.1944	12.4394	7.52075	5.6405	3.70442	4.47126	2.49833	3.03594	4.98384	3.39202	10.3919	14.0725	13.2783	15.2159	13.258	12.5146	21.6362	12.5336	31.2364	11.022	18.4248	7.31353	7.28133	21.7347	6.13937	5.97746	12.4415
Smp_011030	Chr_6	15461519	3008	Chr_6	Sjp_0052650	SJC_S000503	36	0.213	Aut_Shared	Aut_Shared	88.2091	93.8277	71.4873	114.585	139.818	95.5759	84.3513	119.187	94.3211	39.3504	35.1419	47.8143	5.68542	4.78012	2.23446	2.06682	2.5742	7.87773	6.6042	6.02352	2.38426	5.64246	0	0	0	0	0	0	456.882	153.74	1016.96	173.054	376.672	164.467	26.8153	28.7799	15.2894	22.2319	0
Smp_011150	Chr_2	27288722	4772	Chr_2	Sjp_0074330	SJC_S001153	93084	3.016	Aut_Shared	Aut_Shared	41.1728	50.038	50.9696	42.6941	47.0209	43.1993	52.1635	58.4738	36.2508	34.825	34.6127	36.5388	6.90292	4.97586	3.68921	5.11555	3.696	8.7188	8.71611	6.18098	6.63046	7.34737	65.0441	67.8844	78.0855	74.5275	83.2384	68.6089	94.3468	58.0306	190.411	58.7637	71.4856	63.9445	10.5719	6.08282	8.41057	5.9172	16.9127
Smp_011180	Chr_2	27218092	13913	Chr_2	Sjp_0046510	SJC_S000407	224219	14.985	n.a.	n.a.	1.13853	0.547154	0.521322	0.730121	0.581348	0.436673	0.553379	0.0270342	0.505192	0.66421	0.526274	0.522802	0.0103729	0.00788904	0	0	0.164902	0.811976	0.914705	0.287715	1.42515	0.288924	6.64606	4.02996	3.10143	3.2711	3.29568	2.56755	3.67826	3.82571	0.340931	2.9749	3.28741	3.14362	0	1.81018	4.14904	0.579157	3.58813
Smp_011220	Chr_2	27127772	18753	Chr_2	Sjp_0009870	SJC_S000034	344744	26.778	Aut_Shared	Aut_Shared	2.11299	1.77972	1.76523	1.46668	1.46774	1.47161	1.10105	0.247097	1.50052	2.08344	1.75704	2.25272	0.300135	0.241922	0.13827	0.151713	1.10108	0.705262	0.844146	1.20211	0.967343	1.1075	20.7035	14.4929	15.7319	13.7897	17.9198	13.9004	12.2696	21.0405	5.18808	18.0645	18.0491	24.8779	0	2.54616	10.0278	3.26186	6.7552
Smp_011270	Chr_2	27049915	8552	Chr_2	Sjp_0074290	SJC_S001153	1187	4.904	Aut_Shared	Aut_Shared	143.651	142.27	174.121	96.9344	53.2509	77.1834	163.364	183.885	235.473	107.489	103.601	187.894	32.1308	25.4422	8.99627	20.5357	92.8397	171.309	196.104	166.856	161.903	156.237	545.234	355.027	527.101	185.558	660.395	289.968	775.304	474.212	1618.08	464.361	1250.16	887.171	79.5947	409.965	419.82	464.827	1.60634e-07
Smp_011560	Chr_ZW	19506646	23772	Chr_Z	Sjp_0067710	SJC_S000880	34304	8.958	S0	S0	2.48313	4.14737	6.54792	4.1338	4.97549	7.54818	2.86709	1.67325	2.08022	8.50865	8.87815	9.79492	4.91291	1.71914	2.29061	3.16935	24.5382	2.09794	2.06305	17.8848	4.63188	13.3963	40.0329	56.4746	67.8438	68.6544	96.5775	121.691	85.7094	255.914	105.653	269.064	68.6433	343.833	82.7377	4.81226	16.921	111.178	0
Smp_011570	Chr_ZW	19546522	966	Chr_Z	Sjp_0005660	SJC_S000017	422839	0.87	S1_mans	S1_mans	1157.99	1130.62	1040.54	2388.42	2112.09	1584.82	2078.13	3498.36	2438.26	1374.96	1495.35	1598.35	1223.31	1187.55	2791.74	2410.6	714.44	691.695	709.48	672.615	899.212	707.882	927.964	1912.89	894.268	1627.35	868.124	1280.05	1705.6	1030.42	5215.27	1133.16	2201.4	1269.21	154.669	501.558	502.141	408.171	206.475
Smp_011600	Chr_ZW	19612683	1275	Chr_Z	Sjp_0080720	SJC_S001555	12117	1.015	S0	S0	34.4685	46.953	40.0482	64.1223	82.2348	70.0556	30.183	14.6344	34.7103	80.2551	74.9312	73.0676	17.2899	34.6354	24.5382	24.8212	23.3927	7.34766	9.98141	21.8119	18.8603	20.6683	26.0301	44.7814	32.6765	56.9456	29.3134	48.1577	21.9886	56.2177	20.5515	52.5431	29.3	53.1498	10.1131	13.9852	5.65668	11.0319	0
Smp_011640	Chr_ZW	23251042	4034	Chr_Z	Sjp_0005630	SJC_S000017	385404	16.851	S1_mans	S1_mans	0.884295	1.36846	1.2572	1.8063	2.42857	2.29539	0.628795	0.120203	0.699792	2.47921	2.15754	1.96812	2.33435	1.57811	1.91988	2.49022	7.21585	0.956252	0.384727	6.4239	1.0458	5.70209	16.0459	34.0922	27.5998	39.0857	23.1086	40.9169	14.1748	47.4265	4.73299	44.7203	15.5583	38.7642	14.9629	12.8691	8.56509	37.3141	0
Smp_011680	Chr_ZW	23396548	25643	Chr_Z	Sjp_0063070	SJC_S000750	5572	16.836	S0	S0	9.03041	7.7311	8.87116	13.0386	10.3246	17.4726	20.7961	15.8007	27.0741	54.7935	60.7667	67.976	5.95864	2.55107	5.15835	10.2142	43.2588	24.2947	21.4614	63.5754	15.1192	69.6277	66.4362	97.6049	59.5294	73.175	70.3054	132.73	143.499	343.051	195.752	385.003	204.811	457.655	145.292	66.3624	68.4611	162.197	39.361
Smp_011710	Chr_ZW	23567972	13674	Chr_Z	Sjp_0130740	SJC_S025624	1010	3.374	S0	S0	15.1697	17.9219	14.7947	28.3528	26.54	23.4883	17.1017	15.4887	13.9801	20.5333	20.5607	19.8138	6.99482	6.75065	10.6266	11.7158	8.169	4.00994	3.40497	8.21223	4.44273	8.06796	34.7834	69.7269	44.6271	64.3066	36.5038	57.3518	42.9723	45.549	69.4366	47.2923	38.2338	49.0316	5.2534	3.87541	2.21669	4.7266	1.78371
Smp_011720	Chr_ZW	23627145	8718	Chr_Z	Sjp_0058950	SJC_S000649	17467	0.41	S0	S0	135.37	157.483	140.803	320.905	317.231	260.323	283.997	430.798	261.694	314.311	333.183	353.175	8.75711	10.5463	18.9336	14.6009	7.97723	4.83565	6.58678	10.5366	5.12946	9.22185	125.791	306.57	158.415	320.512	149.424	235.236	290.728	270.523	806.192	301.247	304.431	345.17	13.254	2.71408	2.78388	5.20046	7.63004
Smp_011740	Chr_ZW	23651589	7421	Chr_Z	Sjp_0058980	SJC_S000649	62196	2.738	S0	S0	2.91838	2.15234	2.12779	3.38117	4.06962	3.39896	1.51431	2.76188	1.59513	4.78316	4.49129	4.10117	3.39842	3.39195	7.25485	5.2916	2.58922	4.23275	3.47163	3.03774	5.34378	2.73849	14.5143	9.48857	11.5395	17.7627	12.4936	26.4547	32.1316	77.9794	91.3321	83.3345	48.7868	80.4408	8.1096	7.75632	13.5777	15.4573	0
Smp_011860	Chr_ZW	23941159	15434	Chr_Z	Sjp_0052610	SJC_S000500	71305	5.703	S0	S0	14.1626	14.7362	15.1375	29.1947	30.444	29.2966	16.4185	11.8154	14.6272	28.2226	27.5392	27.8631	3.92729	5.21042	7.76133	8.37485	9.57872	3.62408	3.0368	11.1935	4.56479	9.81033	38.4459	74.8008	38.5956	76.4748	43.1945	75.2252	48.4627	73.8576	59.0367	70.414	46.2018	75.6892	20.3171	16.0211	16.1567	26.0346	4.89342
Smp_011870	Chr_ZW	23957019	821	Chr_Z	Sjp_0052600	SJC_S000500	70066	0.749	S0	S0	0.288331	1.02626	1.06067	2.43455	1.08194	0.776566	207.894	426.382	253.846	5.42036	6.42447	4.35814	0.307622	0.579327	1.78694	0.213912	2.96915	112.094	136.484	3.07941	101.229	1.08805	0.244732	1.75991	0.29186	0.898521	0.631984	0.6691	156.171	4.22631	581.253	4.3608	210.907	2.86341	7.41046	75.8501	125.001	4.05615	126.672
Smp_011960	Chr_ZW	18401750	23907	Chr_Z	Sjp_0095100	SJC_S002725	331	13.342	S0	S0	1.37585	1.17145	1.33975	2.01854	2.55101	2.63751	0.915023	0.263149	0.807459	1.14845	1.43262	1.11565	1.11226	1.33602	0.869112	0.880055	2.35719	4.93286	4.51827	3.53386	3.14107	3.07329	13.5615	22.7498	13.4267	27.0089	15.528	30.2565	17.1355	20.4737	9.66079	21.7331	16.8709	19.381	6.45176	31.0243	38.8422	16.9329	21.7054
Smp_011980	Chr_ZW	18558486	6863	Chr_Z	Sjp_0072000	SJC_S001026	24291	9.142	n.a.	n.a.	9.21292	9.66928	7.5748	16.4786	17.0416	13.0588	8.32736	3.54503	8.20117	12.0763	10.3516	10.7404	6.46101	6.78105	9.29632	11.6535	7.62616	5.6609	3.84435	8.93323	4.05707	8.06994	24.7532	44.6422	26.7739	44.7796	21.3226	36.0018	23.4169	31.4386	18.6778	26.5838	26.2336	29.5555	2.27654	2.41509	7.59295	8.65489	0
Smp_011990	Chr_ZW	18579793	21856	Chr_Z	Sjp_0072010	SJC_S001026	43804	5.42	n.a.	n.a.	7.92917	6.94919	6.91349	7.16865	4.78448	4.77552	5.9286	4.01122	8.1118	3.62444	4.19243	4.48081	2.50095	1.1199	2.48517	3.83771	5.41922	4.89149	4.74345	10.7674	3.39723	8.48086	46.0972	38.6221	37.9131	27.4777	40.3638	27.3427	46.7729	25.1627	53.4505	28.3238	69.0479	35.8911	159.817	60.0994	34.3081	126.097	55.4725
Smp_012010	Chr_6	7578845	16561	Chr_6	Sjp_0030830	SJC_S000197	89435	31.168	Aut_Shared	Aut_Shared	4.13656	3.48556	2.87601	3.03775	2.72351	2.39803	0.406472	0.125643	0.504457	1.07567	1.0078	0.699601	5.3724	3.11941	1.20518	2.54509	0.874504	0.449218	0.618508	1.66653	0.534953	1.83394	49.8682	36.1271	40.1734	31.3865	36.005	28.381	5.74521	13.357	3.00191	13.359	7.49958	9.40065	0	1.6973	1.667	2.71502	0
Smp_012030	Chr_ZW	18712900	15465	Chr_Z	Sjp_0129030	SJC_S023768	2264	4.975	S0	S0	11.6336	11.7939	9.82073	20.5538	22.1936	19.9631	11.1352	8.60431	7.19866	19.7958	20.5803	19.9988	3.65812	4.18506	6.04263	5.33281	3.95918	4.40076	4.2149	4.56378	4.4738	4.15887	40.0586	72.0978	38.7293	76.26	35.0139	68.1687	37.4982	58.3597	51.9315	60.5106	25.7023	61.7209	4.18334	33.8695	26.4287	20.002	14.1611
Smp_012070	Chr_ZW	18800757	778	Chr_Z	Sjp_0061140	SJC_S000698	42575	5.188	n.a.	S0	7.57609	7.70444	7.78413	19.5477	18.5489	14.5748	14.7184	22.3325	12.1787	12.2431	13.4231	12.8103	90.802	78.2994	163.047	156.299	90.3116	60.9157	47.0783	80.157	81.8805	64.2985	64.4323	153.144	66.9605	149.539	62.9892	118.907	123.027	102.526	356.213	106.336	119.95	110.53	0	26.9074	21.3116	20.7314	28.8193
Smp_012110	Chr_ZW	18862899	4408	Chr_Z	Sjp_0098440	SJC_S003483	1519	1.782	n.a.	n.a.	18.0573	12.6529	13.1515	39.0419	30.3548	20.7265	24.0426	33.8727	24.6723	17.2707	17.4019	18.4644	35.6458	33.026	73.0039	68.0016	27.8458	21.4404	26.1246	45.597	14.0689	50.3084	39.4676	89.9984	33.0595	63.395	33.3663	46.566	74.6314	47.0607	191.808	49.6746	94.759	59.0243	29.3496	33.2436	52.6859	78.9335	16.5122
Smp_012150	Chr_ZW	18944403	18702	Chr_Z	Sjp_0073080	SJC_S001068	26221	4.091	S0	S0	10.0827	12.5261	12.6872	18.9263	25.7512	21.611	11.9085	6.43658	9.35914	19.6236	20.2898	20.8733	3.56321	2.83468	3.1232	4.26706	8.36496	3.55066	3.336	7.7843	3.92504	8.88418	44.1578	98.7093	60.0225	135.974	65.2919	111.316	80.9382	114.522	76.1893	131.703	67.4003	136.254	55.4251	38.3065	33.5521	81.8183	39.1394
Smp_012200	Chr_ZW	19123003	5215	Chr_Z	Sjp_0067630	SJC_S000877	31	1.131	S0	S0	26.7325	34.2082	31.492	39.3146	49.26	43.585	19.0426	14.4468	18.2783	33.4645	39.3548	37.1737	12.3494	13.8068	18.2988	20.226	20.8421	7.60831	5.89249	15.473	10.112	18.8422	19.2387	27.462	24.6274	35.6409	22.9034	31.9695	16.8018	26.8227	22.4907	32.0793	17.9352	33.6938	10.3281	3.63349	3.35457	4.14597	3.51225
Smp_012280	Chr_2	15846920	3482	Chr_2	Sjp_0030270	SJC_S000193	144364	6.856	Aut_Shared	Aut_Shared	24.6011	26.6462	29.1813	26.1672	27.363	28.1237	34.1854	38.7815	32.7009	32.3778	33.5526	38.413	84.9561	91.8031	75.1831	78.5405	58.889	77.391	63.381	56.3919	76.6934	63.3667	102.587	108.296	105.03	106.745	125.481	115.762	152.387	129.991	313.825	137.193	159.652	171.343	50.4245	120.667	88.977	76.8082	56.7553
Smp_012380	Chr_2	15399085	55129	Chr_2	Sjp_0070330	SJC_S000969	142757	16.431	Aut_Shared	Aut_Shared	1.48521	2.04279	2.08711	1.40003	1.97279	1.76997	1.39488	0.45201	0.841723	2.34332	2.02559	2.14557	0.458775	0.307273	0.16524	0.207704	0.356342	0.0849668	0.0788254	0.282801	0.107135	0.31192	27.6348	29.2736	39.3646	41.3354	46.0884	38.1266	27.3318	41.2419	16.3026	35.4113	18.2602	37.6591	5.69389	3.63639	1.59468	6.21722	0
Smp_012410	Chr_2	15371680	5887	Chr_2	Sjp_0093020	SJC_S002531	6867	5.033	Aut_Shared	Aut_Shared	17.6355	16.5961	14.5745	15.161	15.8999	13.0013	17.0023	9.84666	14.4628	14.3375	13.571	13.5421	27.285	20.1485	22.1735	28.794	11.9352	11.9351	9.70157	12.5615	13.7591	11.039	86.8781	74.392	79.7718	77.2959	78.9696	64.6637	100.295	77.0095	108.478	75.3447	95.5038	79.7569	13.1977	7.02633	8.88221	8.499	11.4689
Smp_012480	Chr_1	21428007	16432	Chr_1	Sjp_0050150	SJC_S000466	138878	11.6	Aut_Shared	Aut_Shared	1.67555	1.43573	0.844664	1.47523	1.04789	0.802273	1.67794	0.698462	1.45583	0.338697	0.276547	0.382705	3.28256	2.72308	1.93305	3.02037	3.80472	3.72257	3.83463	3.83363	4.05648	3.46563	7.00052	6.57876	6.15709	4.57817	3.78504	3.58865	7.16771	1.6119	5.26551	1.4553	7.73805	1.88603	2.10455	17.8582	12.8639	10.2844	0
Smp_012530	Chr_1	21500077	3326	Chr_1	Sjp_0050180	SJC_S000466	208976	1.573	Aut_Shared	Aut_Shared	138.939	149.205	157.996	137.414	138.582	131.268	177.847	270.158	134.014	135.292	146.411	147.669	53.5988	64.6703	50.9	44.3859	30.0926	26.3442	23.0512	23.7541	22.9583	29.1407	372.179	416.975	426.159	384.929	487.948	381.578	561.601	392.385	1548.85	411.68	455.53	447.58	19.5094	19.4782	16.6201	17.1803	0
Smp_012570	Chr_1	21569058	14569	Chr_1	Sjp_0065870	SJC_S000829	43024	4.501	Aut_Shared	Aut_Shared	40.3996	42.6942	37.5658	33.8125	38.5741	30.9497	19.9587	16.9208	17.0779	21.0949	20.461	21.5537	19.9479	13.1716	11.9011	16.7557	8.11991	5.7116	5.39025	8.8357	5.82035	11.6497	74.3194	66.1166	81.0601	72.1329	74.6193	58.8771	43.1311	41.1428	64.9577	39.5266	39.3097	42.8676	29.6914	5.12622	5.99029	11.1035	20.4163
Smp_012680	Chr_1	21844529	11329	Chr_1	Sjp_0022580	SJC_S000125	170405	9.316	Aut_Shared	Aut_Shared	0.0231816	0.0550068	0.0568514	0.0150566	0.0217468	0.0156088	0	0	0.10939	0.0281157	0	0	0.105096	0.284194	0.0511966	0.071309	0.367057	0	0.0273985	0.0743872	0	0.23655	0	0.0860053	0.313785	0.120752	0.33973	0	0	0.15146	0	0	0.510241	0	6.39051	0	0	0	0
Smp_012690	Chr_1	21868630	8024	Chr_1	Sjp_0022520	SJC_S000125	82725	6.242	Aut_Shared	Aut_Shared	5.32808	5.13101	4.70912	3.99994	4.99829	4.14664	5.01871	4.52139	4.40806	5.3921	5.33202	5.83611	11.6189	12.4251	7.30493	8.5841	8.22042	8.55044	7.93014	10.9753	8.30709	10.3256	76.3876	75.9258	93.8862	74.4058	88.0622	77.2511	81.9651	93.776	159.101	90.7416	93.1116	105.599	874.44	71.7454	70.1368	148.266	514.844
Smp_012720	Chr_1	21917297	22874	Chr_1	Sjp_0022510	SJC_S000125	186	20.788	Aut_Shared	Aut_Shared	4.24898	5.07809	4.535	4.6288	4.61945	4.65867	3.1746	1.18874	2.44412	4.43515	4.19872	3.66183	6.87554	3.57006	4.91022	7.1603	11.2964	6.23976	5.07514	8.95269	7.22981	9.42145	56.4759	62.0938	69.6925	60.8461	66.4861	63.0627	43.6255	53.0237	27.9719	52.9172	37.9509	47.4243	239	51.4908	52.3258	39.9375	121.072
Smp_012740	Chr_1	21972423	5006	Chr_1	Sjp_0044400	SJC_S000371	13880	7.382	Aut_Shared	Aut_Shared	16.295	15.862	14.098	15.448	15.6981	17.2556	17.6456	10.9756	15.3826	18.5037	17.2739	16.3964	26.2057	25.0611	16.1457	14.6503	24.6913	27.8509	21.2057	35.9836	17.5289	31.8522	61.5006	63.5214	59.9674	64.0834	59.0678	67.1021	68.7724	67.6845	79.5506	63.2513	67.843	64.103	3.36535	10.0976	10.3642	8.69606	0
Smp_012750	Chr_1	21985243	604	Chr_1	Sjp_0113150	SJC_S007919	8106	0.531	Aut_Shared	Aut_Shared	939.081	848.765	772.498	967.343	893.164	635.048	1870.08	3397.26	2100.12	601.788	671.847	667.848	2290.64	2631.82	3358.99	2314.72	463.415	1137.73	1029.35	436.365	992.522	507.282	841.106	888.63	761.047	757.53	706.055	571.198	1682.08	500.267	5704.23	582.619	2158.11	606.824	188.383	991.457	906.186	253.115	387.541
Smp_012780	Chr_1	22204940	26151	Chr_1	Sjp_0057800	SJC_S000621	199432	38.18	Aut_Shared	Aut_Shared	3.61442	3.26149	3.41594	2.32922	3.18376	2.90215	1.24885	0.417346	1.6358	3.59136	3.91401	3.25911	3.10563	2.91563	1.22246	1.48148	8.46615	1.26437	1.4362	9.23264	1.67775	6.9001	23.3818	15.0601	20.4333	20.1946	23.9292	19.0992	8.93115	23.6091	5.51744	25.2938	12.6661	22.6599	24.5827	4.16836	6.81671	24.6602	8.24721
Smp_012790	Chr_1	22244800	1676	Chr_1	Sjp_0057790	SJC_S000621	170560	2.401	Aut_Shared	Aut_Shared	29.0525	30.7338	31.3784	32.3065	28.6043	29.252	44.7545	53.7107	38.624	30.7635	31.6764	33.0095	61.9554	74.7452	59.8694	51.5967	36.3615	29.2635	32.225	31.3008	37.5055	37.9755	75.9405	90.4753	87.6018	76.8685	91.8668	84.6495	147.102	90.4923	312.341	92.7397	136.254	105.547	3.53711	27.0505	17.7457	31.7582	5.97497
Smp_012800	Chr_1	22251977	409	Chr_1	Sjp_0057780	SJC_S000621	164997	0.272	Aut_Shared	Aut_Shared	595.479	564.253	555.427	678.647	618.206	536.741	809.592	1401.5	761.633	520.963	539.572	630.767	378.175	372.129	474.482	315.69	136.381	123.958	127.498	146.293	136.155	141.419	535.678	628.922	478.038	580.314	535.208	462.03	897.48	559.026	2863.46	538.939	946.929	687.791	18.8927	48.9682	70.9429	47.3957	0
Smp_012810	Chr_1	22303222	14838	Chr_1	Sjp_0057770	SJC_S000621	117333	10.879	Aut_Shared	Aut_Shared	16.1588	23.3165	25.3154	10.2503	12.6074	17.6569	7.55886	4.92778	3.39902	15.4329	16.427	16.1667	2.87898	1.63479	3.46055	2.58023	6.4748	0.724218	1.35974	8.9027	1.73435	6.75777	258.687	170.194	388.581	203.086	443.452	305.097	144.998	298.453	172.738	345.219	75.9946	337.918	14.833	1.71508	1.87011	10.3545	7.10819
Smp_012920	Chr_1	22700345	5476	Chr_1	Sjp_0089000	SJC_S002203	8249	2.933	Aut_Shared	Aut_Shared	1.25173	1.65981	1.39946	1.62601	1.79591	1.7848	0.863888	0.276241	0.297817	1.65211	3.0078	2.76008	0.0922416	0.146988	0.0560741	0.0256569	0.471342	0.0503172	0	0.423213	0.154081	0.122346	1.86072	2.07509	2.4801	2.51159	1.97854	2.09474	1.21155	2.52023	0.774843	4.03067	0.42451	4.31372	6.89108	0	0	0	0
Smp_012930	Chr_1	22779570	22204	Chr_1	Sjp_0061360	SJC_S000707	225897	21.247	Aut_Shared	Aut_Shared	3.98439	3.65394	3.04735	3.28767	3.1752	2.89496	3.75107	2.85999	4.04948	2.05872	2.42832	2.52573	4.68626	3.2642	3.6217	4.3328	3.82312	21.282	32.0267	3.56768	20.6529	4.82773	39.3867	33.8799	36.959	30.8239	32.2528	30.6048	39.9258	18.4362	52.2184	23.3323	44.702	25.9776	17.1957	166.708	236.891	24.1478	96.627
Smp_012980	Chr_3	13111230	11342	Chr_3	Sjp_0029780	SJC_S000191	202341	6.145	Aut_Shared	Aut_Shared	14.4794	14.3017	14.652	14.9056	15.4294	12.9202	25.1898	14.7232	22.4119	20.1826	18.75	19.1658	11.5441	10.1547	12.1648	13.2545	21.6821	18.536	17.0223	22.0305	19.1186	18.2919	118.384	117.882	112.664	115.136	116.412	106.101	195.473	136.292	222.927	138.999	200.989	147.249	22.8159	60.6017	61.5099	82.8033	45.0011
Smp_013050	Chr_3	12739131	20315	Chr_3	Sjp_0006790	SJC_S000021	956987	12.312	Aut_Shared	Aut_Shared	4.10451	4.37026	4.38775	4.29506	4.42637	3.75577	4.36853	2.4568	4.10308	3.92506	3.20265	3.82843	2.41715	3.76763	0.987516	1.09445	1.99049	1.11219	1.13066	1.62822	1.34983	1.81384	27.0212	30.0895	28.0617	31.3285	30.8827	25.4502	29.4089	24.113	29.1355	20.5801	29.2838	25.0789	0	6.61347	5.60272	7.9646	0
Smp_013080	Chr_3	12858805	36478	Chr_3	Sjp_0006750	SJC_S000021	820233	12.342	Aut_Shared	Aut_Shared	0.979888	1.03801	0.815339	0.829649	0.787916	0.777604	0.429259	0.0547059	0.212323	1.17784	0.963875	1.06851	0.465856	0.46438	0.189867	0.189689	0.856944	0.166177	0.0850917	0.641094	0.127217	0.771387	7.57089	6.07003	6.64384	5.63789	6.45541	7.0298	3.39952	9.04507	1.01124	7.12695	1.88368	8.70854	0	1.79185	0.586701	4.58628	0
Smp_013150	SC_0183	182973	4273	Chr_UP	Sjp_0086090	SJC_S001847	27514	4.587	n.a.	n.a.	8.42749	10.3338	9.52567	9.84655	9.71669	10.81	15.0399	16.0147	12.8539	12.2198	12.4136	12.7239	5.58968	7.16665	3.28964	2.60576	1.00674	2.83727	5.81133	0.739585	5.13397	0.993009	63.4834	66.1166	73.6198	70.3246	78.0111	78.1039	109.039	79.8914	201.976	82.9538	100.864	90.8576	2.00846	6.81646	8.36856	1.09037	0
Smp_013200	SC_0183	851	2260	Chr_UP	Sjp_0046280	SJC_S000403	88614	1.933	n.a.	n.a.	440.411	450.675	409.345	510.202	466.918	350.102	1044.35	2450.98	1294.58	330.016	322.233	355.977	757.864	845.672	1047.53	735.264	194.342	1055.94	1064.69	311.457	650.358	467.396	993.31	1165.65	1031.35	1043.18	971.782	817.872	2413.61	698.941	10452.3	698.201	3357.48	820.255	69.2355	40.3036	94.5647	34.0892	101.725
Smp_013300	Chr_3	9095357	4670	Chr_3	Sjp_0132440	SJC_S026340	5237	0.278	Aut_Shared	Aut_Shared	62.1468	93.0878	87.1599	85.2705	79.4339	86.8287	169.029	277.844	129.349	134.261	137.03	141.372	17.2904	17.5334	18.7612	19.3146	31.1657	29.2058	34.5625	30.6325	27.7335	33.2354	84.019	129.47	107.355	93.6429	112.357	131.262	415.181	307.459	1359.5	367.147	316.551	354.78	0	36.5514	76.7448	69.7404	0
Smp_013360	Chr_3	8636973	6600	Chr_3	Sjp_0128520	SJC_S023449	25	0.513	Aut_Shared	Aut_Shared	38.3087	29.468	31.7467	31.1705	41.8613	31.4634	72.0667	76.3362	64.9872	32.1663	29.9638	30.7972	19.7235	20.9099	31.1094	32.2026	15.2952	18.5779	24.1734	21.3237	20.838	22.8736	13.0955	13.8584	5.68765	5.46748	9.98755	13.7488	41.8632	11.7125	39.1865	1.92891	33.1412	17.3483	134.066	103.447	109.487	131.117	180.411
Smp_013370	Chr_3	8632694	4350	Chr_3	Sjp_0069320	SJC_S000950	22242	3.025	Aut_Shared	Aut_Shared	44.6199	52.5996	50.2489	49.2907	51.5021	54.9441	70.3216	86.4677	64.6339	60.4811	61.8171	66.5151	22.5518	19.1344	22.3375	21.7771	16.7127	19.5726	16.6972	16.9515	17.7478	20.176	118.996	140.524	143.675	137.157	147.094	153.422	189.269	149.65	415.708	153.408	189.525	170.634	5.92955	0	5.31862	3.83139	0
Smp_013470	Chr_3	8324374	899	Chr_3	Sjp_0120960	SJC_S013686	263	0.234	Aut_Shared	Aut_Shared	721.713	701.873	612.806	899.15	708.21	581.648	1562.21	2460.66	1925.55	553.514	514.666	594.818	2278.07	2789.67	2907.28	2147.74	555.547	1857.04	1915.56	606.27	1205.09	850.315	330.206	359.782	282.723	287.54	306.1	190.974	2586.65	877.286	7282.46	910.232	3461.12	1047.99	1100.74	1147.98	1236.92	393.36	2219.84
Smp_013520	Chr_3	8036745	17629	Chr_3	Sjp_0021420	SJC_S000116	190213	11.244	n.a.	n.a.	3.24593	4.64864	4.16863	3.28089	3.9279	4.24183	3.13435	2.46197	2.38236	2.66725	2.74604	2.77536	4.0441	5.02448	2.99396	3.29147	3.63586	3.48544	3.94401	3.50162	4.64255	4.31976	22.1735	22.7636	32.7114	25.1764	31.2807	28.1782	25.9074	18.5312	35.851	19.4136	20.2574	21.0379	3.04891	27.1901	32.2574	23.2099	5.14265
Smp_013570	Chr_3	7918119	986	Chr_3	Sjp_0048820	SJC_S000445	265517	3.336	Aut_Shared	Aut_Shared	18.9677	17.358	20.1627	10.7639	8.62356	14.7766	7.87147	6.63846	6.4587	8.00853	7.41245	7.74965	34.1403	25.9744	8.89283	11.435	12.216	36.049	45.9615	21.5811	33.8013	8.38026	53.9902	27.6009	48.8243	22.3117	57.9821	40.4003	26.1989	23.8614	36.8318	24.0128	24.0162	25.0535	23.8309	35.5214	55.0955	19.5238	40.5544
Smp_013610	Chr_3	9871181	11080	Chr_3	Sjp_0048770	SJC_S000445	78142	11.307	Aut_Shared	Aut_Shared	6.89499	7.04741	5.14076	5.47076	7.70452	5.58139	2.99466	0.597135	1.94419	4.20444	4.26753	3.74145	1.52394	0.736358	0.646641	0.881278	1.02238	0.37302	0.252128	0.988765	1.06611	1.0884	26.7228	20.9638	27.064	28.4523	20.8615	21.5809	12.1048	15.8086	3.97753	15.8233	8.86543	14.9369	2.62995	1.11639	0.731551	4.28738	0
Smp_013690	Chr_1	5411994	24127	Chr_1	Sjp_0056700	SJC_S000591	440	18.309	Aut_Shared	Aut_Shared	8.0326	8.34061	8.97465	6.47365	6.8051	8.98252	8.39776	5.22178	6.70305	9.61354	9.95056	10.5546	5.09784	4.44464	3.99908	4.12868	3.09643	3.42609	3.25488	3.37938	3.35723	3.95237	161.585	126.533	165.32	130.44	190.247	174.802	169.69	179.671	196.476	180.728	150.587	202.587	3.44084	10.9449	14.3276	11.2031	5.7804
Smp_013810	Chr_2.unplaced.SC_0120	314862	3009	Chr_UP	Sjp_0061320	SJC_S000706	53164	11.834	n.a.	n.a.	12.2817	9.46163	9.61108	5.33381	6.98478	6.96709	3.27005	1.32366	2.70645	3.7848	4.71	3.58587	42.2548	95.911	19.2984	16.926	15.4877	6.77626	7.53041	16.3841	12.7586	11.578	90.85	42.4859	69.6931	53.0228	78.0575	53.1433	28.161	28.3233	20.0115	36.0071	23.968	31.2301	0	5.93859	15.6234	16.752	9.48456
Smp_013860	Chr_2.unplaced.SC_0120	438381	31151	Chr_UP	Sjp_0005910	SJC_S000018	502797	18.379	n.a.	n.a.	6.99148	7.22145	7.94628	6.14371	5.57767	8.44195	8.95483	6.51706	7.99243	10.1256	10.1527	10.0313	1.04703	0.927852	0.420574	0.684423	4.71823	2.98968	3.39782	5.27536	2.96589	4.58101	50.8751	44.0242	49.241	39.7782	60.0823	62.6029	63.6588	65.7392	85.6401	66.9553	63.1028	70.8808	24.3814	23.6762	42.7104	45.4841	17.6481
Smp_013870	Chr_2.unplaced.SC_0120	484698	3037	Chr_UP	Sjp_0104260	SJC_S004219	1082	6.711	n.a.	n.a.	9.39657	10.1557	10.9106	8.02603	9.78097	8.88376	13.3346	13.3004	10.9984	8.645	9.42085	10.5841	38.8952	31.5993	28.3774	28.5898	35.1754	26.9459	23.916	42.3863	26.5321	44.1204	35.3371	31.6008	40.154	38.8602	45.4111	33.4951	60.8859	35.8851	110.328	39.7002	55.4674	49.2691	38.9343	20.9189	19.2494	37.4892	22.179
Smp_013930	Chr_2.unplaced.SC_0120	578259	16990	Chr_UP	Sjp_0020040	SJC_S000107	107482	7.278	n.a.	n.a.	19.1094	16.5111	14.2449	17.943	17.0637	13.3664	19.6068	10.0006	14.3222	13.2978	13.3334	13.1682	4.4574	3.5187	3.29131	4.51923	5.01326	3.73005	3.81831	4.11694	4.69301	4.27191	82.214	78.2595	69.8907	71.2545	64.0143	58.8512	82.7785	53.4009	79.4686	53.3681	67.5425	54.9888	105.253	17.9811	6.22759	39.8996	108.184
Smp_014010	Chr_2.unplaced.SC_0120	709698	16702	Chr_UP	Sjp_0020080	SJC_S000107	207763	18.261	n.a.	n.a.	18.7802	16.5006	16.6913	20.4859	19.9808	19.8278	12.9609	5.87885	12.5006	24.5775	24.6087	25.8909	19.1826	18.1116	17.4001	18.9039	21.9013	9.89835	9.18072	21.8352	13.1851	19.2275	175.683	192.226	160.012	182.877	166.145	195.302	123.061	211.946	97.4197	213.36	125.484	237.995	118.729	57.2427	54.5182	81.1551	75.812
Smp_014050	Chr_ZW	49136291	23321	Chr_PSA	Sjp_0012270	SJC_S000051	272970	7.309	PSA_shared	PSA_shared	14.3008	14.5481	12.8077	12.8388	12.889	11.8773	11.6448	7.51945	8.74412	8.13479	9.01582	8.55697	4.65209	4.56844	2.11107	3.08304	2.5148	3.28457	2.87491	2.79152	2.74966	2.65256	26.6348	24.4319	29.2693	24.1271	25.7476	24.0191	27.4755	18.0612	33.0707	19.6713	22.0665	20.0084	15.3436	19.5314	24.3649	13.0935	0
Smp_014290	Chr_1	19293681	16137	Chr_1	Sjp_0110450	SJC_S007056	3004	0.346	Aut_Shared	Aut_Shared	146.054	174.764	150.01	120.808	134.086	153.397	205.046	259.925	139.692	209.314	220.972	233.214	9.03053	9.02595	5.43368	4.36633	6.90439	3.07348	3.59697	5.31375	4.62736	5.45263	208.676	178.912	257.02	160.136	192.14	168.351	291.57	305.227	758.807	319.004	291.892	385.508	80.1692	8.83233	8.13011	15.5668	28.2551
Smp_014400	SC_0037	2060638	4480	Chr_UP	Sjp_0018430	SJC_S000090	339460	3.884	n.a.	n.a.	127.385	89.5853	81.8509	94.6552	78.5543	70.9464	85.786	81.2163	64.4327	57.5239	57.2652	48.0392	75.88	77.6733	53.3094	53.4862	37.9607	59.4127	56.606	61.5589	58.0077	59.8185	141.877	109.069	100.766	85.8498	94.6964	80.9907	105.437	63.8327	180.681	63.8191	86.1832	57.5089	4.71734e-07	16.9838	22.753	11.4902	0
Smp_014610	Chr_2	12305890	13594	Chr_2	Sjp_0024010	SJC_S000138	283201	1.277	Aut_Shared	Aut_Shared	2.70584	3.2103	0.829487	11.3137	4.28348	1.70805	1811.28	1531.61	1515.68	1.74344	2.40743	14.3146	0.0291949	0.0242225	0.0250978	0.00258381	1.2236	1382.63	1223.64	1.85979	1176	5.28982	1.74964	6.29098	2.38465	2.63831	0.40341	1.02504	1335.55	1.36686	2028.06	1.70727	1204.3	10.1586	10.585	4103.86	4034.42	4.02319	2916.2
Smp_014620	Chr_2	12326416	7787	Chr_2	Sjp_0024020	SJC_S000138	297249	6.867	Aut_Shared	Aut_Shared	18.6807	15.5218	14.5191	18.6288	16.2853	13.4252	30.3905	34.5898	28.0268	16.3251	17.966	16.4662	9.9292	11.2997	7.44401	7.35685	5.06395	13.7999	11.9982	5.41115	14.3027	5.36295	74.9469	75.8137	61.4482	61.8856	56.2655	56.5624	139.286	67.0011	283.87	75.7093	139.723	72.4625	0	32.9946	33.3189	18.4248	33.6675
Smp_014650	Chr_2	12403624	766	Chr_2	Sjp_0024040	SJC_S000138	320227	0.441	Aut_Shared	Aut_Shared	1073.92	1031.86	939.458	1191.16	1106.68	793.336	2081.45	4136.82	2388.41	676.791	728.336	765.95	885.694	1097.03	1659.22	1065.42	242.794	709.706	731.014	279.169	585.998	372.01	821.344	928.374	721.743	785.859	725.604	604.608	2220.73	660.354	7974.09	702.062	2794.15	770.793	170.365	681.903	669.808	247.531	116.885
Smp_014680	Chr_2	12532790	1740	Chr_2	Sjp_0024060	SJC_S000138	420824	0.833	Aut_Shared	Aut_Shared	11.148	19.9933	15.1004	8.75619	16.5382	18.1547	6.36004	0.324216	5.94215	19.6523	14.602	15.2044	2.48825	2.5863	1.09805	1.3323	4.69735	2.37532	0.891947	5.20653	1.69719	3.20866	7.94637	5.19487	15.7943	11.493	11.6593	11.3565	5.59735	15.5246	0.568218	12.3001	6.53746	13.4938	3.25261	0.690773	0	5.30749	0
Smp_014730	Chr_2	12656132	8334	Chr_2	Sjp_0076800	SJC_S001292	2200	7.713	Aut_Shared	Aut_Shared	1.39998	2.15927	1.99134	1.36394	2.20638	1.92299	1.62761	0.787842	1.11362	1.25648	1.43837	1.16807	1.4676	1.97992	0.618169	0.522608	0.791464	1.58697	1.89948	0.758398	2.1767	0.964676	7.85867	7.12249	12.354	11.6394	10.7234	10.2545	9.88495	7.6081	10.115	8.16846	7.89691	7.25904	0	2.75069	2.40836	5.87416	0
Smp_014800	Chr_2	12866992	829	Chr_2	Sjp_0118570	SJC_S010206	8197	0.597	Aut_Shared	Aut_Shared	51.7292	66.5233	66.3143	63.4375	62.1014	58.2135	112.471	125.084	105.834	72.8303	77.0195	90.3272	79.5145	87.6493	43.5838	52.0721	207.392	90.0731	77.5058	182.727	83.9677	173.486	43.0009	47.4893	42.8176	40.2352	45.2798	41.0906	87.8016	53.3509	189.641	54.5528	91.9697	67.8709	36.9329	32.1389	34.1752	88.2484	26.5799
Smp_014820	Chr_2	12887236	27915	Chr_2	Sjp_0109110	SJC_S005812	144	9.182	Aut_Shared	Aut_Shared	6.35039	7.17153	7.05151	4.75094	7.03846	5.65368	0.9282	0.147066	0.824471	5.69094	5.05136	4.35138	0.886643	0.453484	0.516995	0.673169	1.09927	0.305988	0.266865	1.44154	0.211579	1.61602	35.0848	26.6261	38.5665	36.4033	39.4903	30.2363	5.8253	32.7528	2.15974	29.2649	5.44295	27.6171	1.15231	0.976882	0.958432	4.37332	0
Smp_014850	Chr_2	12961308	11132	Chr_2	Sjp_0071560	SJC_S001014	165030	20.34	Aut_Shared	Aut_Shared	5.95643	5.98355	5.34445	5.48243	5.60766	4.79702	3.07465	1.20165	2.89161	3.59923	3.58147	3.30597	6.34926	3.76319	3.30392	4.88434	4.93347	5.91568	3.93155	4.20155	6.63205	5.27613	38.0982	33.6142	37.3214	34.443	35.9227	31.0818	20.8873	22.3842	14.9553	22.0331	21.4976	21.9174	5.18646	14.31	18.0319	18.3182	8.73601
Smp_015100	Chr_3	27212373	6220	Chr_3	Sjp_0014180	SJC_S000062	2171	0.485	Aut_Shared	Aut_Shared	15.1395	10.5659	8.46312	14.1713	16.7087	13.4918	15.198	16.7055	20.7118	25.6525	21.4966	28.2677	10.3598	14.7347	1.72236	1.66586	0.852979	1.37326	2.24564	1.72747	0.406953	1.25664	15.0353	16.2796	11.2066	16.8191	9.70657	19.5898	16.9026	19.2029	33.2616	22.0466	29.1566	34.4308	4.68784	6.97884	9.16979	12.7771	0
Smp_015190	SC_0126	697773	4009	Chr_UP	Sjp_0086200	SJC_S001852	107642	12.782	n.a.	n.a.	3.9029	4.89111	3.30447	7.08909	5.38895	4.22061	1.91923	0.264114	2.18681	19.2008	19.6701	15.006	0.152994	0.0912615	0.0255311	0.140182	2.68258	0	0.15485	1.78679	0.631391	1.55975	8.54219	16.7809	9.93373	12.2874	7.46271	10.0505	5.85667	47.2638	1.55441	48.4902	6.92274	39.1773	5.19005	0.275034	0.719703	0.351822	0
Smp_015220	SC_0126	661118	9665	Chr_UP	Sjp_0006080	SJC_S000019	199901	4.794	n.a.	n.a.	11.6674	16.0339	15.9916	9.77249	14.2415	12.5575	11.8199	8.0278	12.9063	9.2062	7.10982	7.2448	8.53742	9.03217	4.6385	5.31317	4.77728	6.41447	9.92373	6.40877	8.24979	7.87925	16.5344	13.4035	22.6981	20.1676	23.8158	18.6848	18.546	13.2404	22.0227	10.1699	21.3189	10.8607	26.0338	6.37693	10.1892	7.86846	5.7963
Smp_015390	Chr_ZW	47972320	10415	Chr_PSA	Sjp_0027650	SJC_S000169	47654	22.478	PSA_shared	PSA_shared	4.68852	4.7191	4.75364	4.16222	4.06484	4.80653	4.2476	3.08784	3.95077	4.62023	4.75122	4.87938	10.1362	10.1558	6.19791	7.008	11.5926	5.42344	5.24531	15.556	8.26331	12.8654	48.4042	44.8014	53.2849	45.1673	53.8577	55.5763	43.4978	43.1562	56.8727	44.3502	43.7132	49.0798	25.9457	19.8241	17.3197	25.3769	26.2217
Smp_015510	Chr_ZW	20874947	5402	Chr_PSA	Sjp_0052910	SJC_S000513	122095	3.278	PSA_shared	PSA_shared	25.9574	26.185	21.61	19.0418	20.2717	19.4297	26.1403	16.3131	14.3451	22.4531	21.8561	21.8678	20.2172	23.3594	17.5643	13.7584	6.92808	7.34494	6.20565	8.65821	7.88769	6.61451	101.322	71.5959	103.952	65.9885	84.651	70.5268	107.411	81.6973	123.062	77.2171	60.9681	85.7917	13.3009	57.0953	41.7029	51.453	0
Smp_015520	Chr_ZW	20888362	7953	Chr_PSA	Sjp_0052900	SJC_S000513	105191	14.134	PSA_shared	PSA_shared	4.58385	4.15132	4.31863	4.67426	3.94178	4.27985	4.96249	3.55408	3.90377	4.92015	5.34318	4.89614	6.13803	5.70906	5.0836	5.0348	4.16493	3.04882	2.53688	4.26505	2.81143	3.17307	33.8386	35.6267	32.0421	28.8489	34.3641	32.1377	40.8929	37.3525	52.0368	39.3692	33.6212	39.4904	0	2.79413	1.2233	4.77372	0
Smp_015530	Chr_ZW	20906099	2321	Chr_PSA	Sjp_0052890	SJC_S000513	90303	0.954	PSA_shared	PSA_shared	284.551	304.566	267.451	254.51	270.124	212.326	272.96	302.911	221.884	243.393	263.406	261.55	400.902	276.521	376.503	493.602	179.905	172.018	153.527	210.229	209.029	226.498	204.42	176.578	223.774	184.812	202.91	155.246	210.87	175.035	415.739	191.787	192.057	196.698	5.34296	2.64037	2.86119	1.18749	0
Smp_015670	Chr_ZW	21323551	944	Chr_PSA	Sjp_0025520	SJC_S000150	17986	0.74	PSA_shared	PSA_shared	84.3412	70.9804	78.1916	83.7814	88.9766	76.243	16.1863	9.30654	4.52487	56.8096	57.0784	59.6386	47.8514	35.8116	51.3577	50.1936	34.1773	3.21071	2.30168	31.4685	3.5752	26.969	49.2617	48.1439	39.7587	49.0975	49.4708	42.6832	13.0811	42.5352	13.7966	45.9576	4.63171	49.6396	18.8119	1.33566	3.51696	6.85303	0
Smp_015690	Chr_ZW	21405088	16709	Chr_PSA	Sjp_0025560	SJC_S000150	102430	5.649	PSA_shared	PSA_shared	16.5917	15.1039	14.2978	19.5168	17.6448	12.6904	17.8803	2.00797	23.1169	13.5159	12.1621	11.0715	18.9867	15.6297	15.6144	20.235	31.5981	29.831	25.7101	19.5943	38.2007	24.8062	116.822	132.346	96.3236	113.59	103.393	91.9316	125.089	78.8204	27.403	79.0639	176.932	72.7926	44.1478	136.748	114.099	92.3023	37.1375
Smp_015710	Chr_ZW	21457393	39993	Chr_PSA	Sjp_0044610	SJC_S000374	63096	3.441	PSA_shared	PSA_shared	1.4435	1.34031	1.50069	0.978326	1.35415	1.60583	0.468587	0.0392433	0.507699	0.608953	1.20419	0.872742	1.98292	1.84246	1.24723	1.45265	1.03261	0.76475	0.714039	1.02726	0.748958	1.02746	0	0	0	0	0	0	0	0	0	0	0	0	9.98451	14.1374	15.7625	11.768	11.2369
Smp_015800	Chr_ZW	21740771	22955	Chr_PSA	Sjp_0001550	SJC_S000003	499990	2.99	PSA_shared	PSA_shared	25.6408	22.5372	21.1231	20.4068	21.0046	19.6963	32.3945	26.3298	33.3525	18.6589	19.178	17.6859	3.60403	3.96708	2.27552	2.50943	1.44298	3.61301	3.11006	3.43261	1.96648	2.65594	80.2522	62.2159	71.8686	63.5286	68.3735	60.5621	100.389	54.4393	153.469	58.4752	114.087	59.1561	117.411	13.0631	14.7933	24.1224	109.418
Smp_015820	Chr_ZW	21838741	28332	Chr_PSA	Sjp_0001480	SJC_S000003	269435	14.704	PSA_shared	PSA_shared	0	0	0.0270145	0.00953941	0.0137781	0	0.0234981	0.0183673	0.0396035	0.00890662	0	0.0177598	0.0980563	0.142049	0.0228802	0.0235551	0.0202446	0.0097253	0.0109557	0.0223087	0	0.00788234	0	0.129071	0	0.181217	0.254922	0	0.43708	0.11365	0.232945	0	0	0.24316	0	0	0	0	0
Smp_015840	Chr_ZW	22003104	4154	Chr_PSA	Sjp_0034430	SJC_S000236	194900	15.012	PSA_shared	PSA_shared	15.1195	9.40436	9.82555	11.2124	9.83815	8.0397	8.78444	4.57856	7.88427	6.54291	6.66008	6.51457	43.8619	48.477	24.8534	31.2517	17.7429	30.9764	27.7221	31.1916	13.812	31.6651	70.9469	52.9294	44.1582	44.3218	48.6567	37.1129	42.4007	29.5859	40.9164	30.1171	43.0294	31.9054	14.9561	29.0945	42.9757	43.336	20.9868
Smp_015860	Chr_ZW	22028959	2875	Chr_PSA	Sjp_0034450	SJC_S000236	244066	0.369	PSA_shared	PSA_shared	219.472	260.388	247.949	242.142	233.888	208.069	345.828	604.552	285.247	240.631	236.177	246.632	29.8928	27.4623	35.3166	38.4963	20.2495	26.5474	25.9114	22.7904	10.8587	25.4782	209.654	238.084	261.764	196.046	254.813	193.083	325.218	214.172	1088.16	226.249	290.893	213.356	51.8337	141.789	121.779	118.084	22.5297
Smp_015900	Chr_4	21298538	6674	Chr_4	Sjp_0000660	SJC_S000001	681331	0.477	Aut_Shared	Aut_Shared	137.635	109.579	122.691	131.446	98.5358	124.378	139.8	159.382	94.9187	139.2	141.791	145.899	16.2612	14.2696	8.85923	9.38368	9.58243	8.25703	6.6042	8.0182	10.3667	8.93424	99.1854	88.5197	71.7686	61.8856	89.2142	87.2173	102.078	96.2271	203.15	100.282	76.5045	110.833	6.49816	17.9976	21.8786	21.3125	33.23
Smp_015980	Chr_4	21157274	1933	Chr_4	Sjp_0000640	SJC_S000001	590382	17.038	Aut_Shared	Aut_Shared	5.10811	6.4063	7.25059	4.91488	7.05116	6.55455	7.48976	15.6292	7.56196	6.3875	6.71539	6.46795	145.14	164.858	141.679	90.8726	94.8781	77.2587	81.8948	90.791	55.4351	92.5408	92.8845	97.0943	118.081	135.24	142.303	120.367	199.495	123.627	642.524	134.142	189.998	147.786	8.41036	60.1074	56.9482	51.8096	23.6256
Smp_016090	Chr_1	1840787	37046	Chr_1	Sjp_0073340	SJC_S001085	801	21.967	Aut_Shared	Aut_Shared	6.45905	6.78842	6.0637	5.36371	6.28059	5.25593	3.44987	1.01429	3.7577	3.77382	3.61437	3.03734	4.77316	3.69956	1.97547	3.3412	6.46014	3.46597	2.89065	5.27191	3.75799	4.67792	23.9826	20.4052	24.5487	22.7017	23.6451	19.6327	14.1259	14.1009	7.41198	13.4936	16.9786	11.8488	13.9175	6.67288	6.89851	11.51	0
Smp_016130	Chr_1	2139869	5891	Chr_1	Sjp_0036650	SJC_S000258	709354	0.266	Aut_Shared	Aut_Shared	129.089	125.221	110.505	117.065	115.006	107.146	131.625	133.513	101.251	95.022	91.4547	99.1545	21.6135	26.6622	21.8052	14.5064	7.35098	6.17398	4.16252	5.86522	6.23036	6.29291	99.1135	62.2029	80.3758	65.5001	61.427	79.9383	136.039	81.0158	224.525	90.6582	112.246	111.082	2.61776	0.390112	2.24256	0.945799	0
Smp_016340	Chr_4	27775747	14329	Chr_4	Sjp_0051110	SJC_S000482	171158	1.648	n.a.	n.a.	22.0154	27.0526	27.0759	28.428	28.8892	27.7059	46.0548	53.3425	38.6041	34.1712	38.0393	31.2163	5.49164	4.55515	4.18826	3.50777	3.42245	3.05746	2.70777	4.0728	2.41424	4.56651	56.3023	78.6128	76.2627	74.0076	70.9011	74.1149	155.803	98.4294	314.102	122.617	150.429	100.16	26.2138	5.62384	6.66809	7.0623	13.4802
Smp_016410	Chr_4	28002917	21301	Chr_4	Sjp_0088510	SJC_S002110	2994	11.009	Aut_Shared	Aut_Shared	23.9912	21.2258	18.7022	21.265	20.5188	17.1446	19.8352	7.38411	19.9021	18.1652	18.3335	16.6637	18.4353	11.2984	12.0288	19.3406	11.895	13.22	12.7796	8.64452	14.3391	11.4277	54.3004	50.2621	49.9143	48.5504	45.3584	39.5498	50.7449	42.1193	33.6913	42.8933	55.7448	41.195	7.5917	25.1999	25.2403	14.171	7.06657
Smp_016490	Chr_4	28239005	15082	Chr_4	Sjp_0038500	SJC_S000282	10323	8.307	Aut_Shared	Aut_Shared	28.7791	32.8181	36.4689	33.906	17.9985	30.3707	29.975	41.7609	68.1033	14.9456	11.5048	26.6264	7.82499	7.48619	1.19669	2.76206	43.3164	62.6271	63.656	68.0718	48.8951	59.1104	499.729	573.01	573.494	290.771	662.52	520.481	538.608	247.995	1391.55	192.283	1387.1	490.907	202.032	707.506	697.956	166.851	202.84
Smp_016550	Chr_4	28436169	20461	Chr_4	Sjp_0038540	SJC_S000282	228246	14.746	Aut_Shared	Aut_Shared	4.30573	3.80528	3.78023	3.21514	4.34147	3.18514	3.42095	1.14468	2.38919	3.23278	3.40824	2.49699	3.9728	3.1757	1.89591	2.16298	2.03235	1.89877	1.60804	1.82254	2.47421	2.29205	23.4078	19.4434	21.3471	24.3498	22.5195	18.4463	19.6104	17.0147	12.0219	17.9924	15.3802	14.1319	1.26788	0.517438	0.330873	0.639784	0
Smp_016640	SC_0255	11180	8138	Chr_UP	Sjp_0013610	SJC_S000059	511466	5.443	n.a.	n.a.	15.4342	15.6755	13.6713	18.4	15.7816	14.5065	21.3924	15.9026	20.274	12.3432	11.9839	12.666	7.71868	10.8393	2.88858	3.66436	5.79703	5.4173	4.50072	6.88642	4.6656	6.31165	38.2555	41.959	36.0735	37.6797	33.969	33.4448	61.2666	34.0927	87.7231	32.762	67.334	36.3932	2.34138	7.45212	7.81035	13.3534	0
Smp_016730	Chr_6	17009644	3922	Chr_6	Sjp_0049880	SJC_S000462	109918	2.205	Aut_Shared	Aut_Shared	18.5109	20.7999	21.6174	17.4301	19.8458	20.3775	17.759	20.8831	15.6477	15.7987	15.7003	16.0474	3.07257	4.15122	1.60064	1.6389	2.04742	2.52915	0.712284	1.55783	4.41021	1.13882	39.8505	43.4198	48.4845	50.9864	52.4934	49.2483	67.5024	50.7447	135.83	48.5342	65.882	56.764	7.85551	2.50412	5.47855	1.0693	0
Smp_016810	Chr_6	17260927	25519	Chr_6	Sjp_0102560	SJC_S004041	1085	12.584	Aut_Shared	Aut_Shared	1.44157	1.58815	1.33627	1.31529	1.52943	1.3173	1.44606	0.4185	1.11061	1.33211	1.21088	1.15172	1.14379	0.834417	0.585591	0.893283	1.21372	1.56561	0.973071	0.998967	0.975374	0.848869	15.1444	14.5117	15.0919	14.0909	13.1253	14.1798	15.6152	14.0916	10.5252	12.9382	14.0002	13.5418	5.57574	10.0607	10.0847	9.84947	0
Smp_016840	Chr_6	17392384	34353	Chr_6	Sjp_0085850	SJC_S001831	30992	12.638	Aut_Shared	Aut_Shared	2.66575	2.45315	2.18967	2.44175	2.72518	2.07107	2.02312	0.940273	1.82007	2.51812	2.63352	1.72536	3.95108	3.25365	2.06279	4.05709	3.61477	2.48644	2.04203	3.6368	2.37015	3.46494	14.9945	14.0995	12.9828	14.7055	12.0671	11.5123	11.6523	13.6565	9.6939	14.2741	11.9497	9.54981	8.57277	3.7289	3.06982	6.5581	0.832545
Smp_016880	Chr_6	17587472	36101	Chr_6	Sjp_0028300	SJC_S000175	15428	20.551	Aut_Shared	Aut_Shared	0.620002	1.17196	1.09528	0.771263	1.23226	1.54957	1.91103	1.37986	1.93392	1.75883	2.07479	1.84885	2.43056	1.94786	2.12452	1.96243	0.989025	0.95405	0.868401	1.06798	1.06342	0.921721	5.53326	6.96669	10.1426	10.5337	10.5843	13.8673	18.1474	14.923	24.3004	18.1975	20.2681	17.0369	5.82172	16.0677	10.5325	9.49471	9.81549
Smp_016890	Chr_6	17633970	4047	Chr_6	Sjp_0028340	SJC_S000175	65986	0.952	Aut_Shared	Aut_Shared	22.6849	36.8723	38.1087	30.9413	35.3261	31.6179	35.4469	30.2129	22.6326	26.5503	30.3273	26.6077	28.0293	26.145	16.3635	17.7227	12.8618	11.7105	10.5843	9.99534	12.5092	8.00143	18.32	27.6836	36.8907	30.8739	34.5121	27.0963	35.4042	26.2778	57.7583	28.0059	25.6257	27.7413	6.85341	37.9763	21.1687	24.364	11.695
Smp_016900	Chr_6	17638846	4047	Chr_6	Sjp_0028330	SJC_S000175	54634	9.554	Aut_Shared	Aut_Shared	2.59948	2.60137	2.43915	3.28866	3.39281	2.37432	6.42523	7.33554	6.93323	2.98827	3.2178	3.43029	11.7413	9.34784	9.51797	9.79003	7.72414	10.2807	11.6581	5.67444	17.2002	5.51822	20.3971	26.2985	22.9736	27.3025	20.4837	18.0077	65.3808	27.2333	112.975	25.0712	67.6819	28.4356	0	28.072	46.4649	15.0386	18.887
Smp_016990	Chr_ZW	57524248	10642	Chr_PSA	Sjp_0038880	SJC_S000288	125094	6.155	PSA_shared	PSA_shared	10.8068	10.1989	9.788	12.8759	10.3683	8.17426	21.5749	28.3236	24.386	7.36201	8.40426	8.78244	8.06215	5.64513	11.9583	12.7731	3.66499	5.92915	5.68761	3.62291	5.15351	4.05011	69.3142	84.036	66.1295	69.1153	68.3429	52.3293	147.519	45.7034	369.13	51.0876	194.047	60.1451	53.6857	9.0432	10.3456	7.20127	37.6609
Smp_017010	Chr_ZW	57459872	10479	Chr_PSA	Sjp_0092310	SJC_S002488	15565	11.574	PSA_shared	PSA_shared	47.2261	42.6372	39.3308	49.822	47.8563	42.0506	49.7745	14.9457	63.5713	48.9046	49.5901	40.2291	38.3142	35.0226	24.1193	39.7265	40.9146	51.0108	43.3946	36.2096	57.3288	36.8688	123.137	133.691	111.845	124.748	109.114	114.483	143.006	127.436	78.1151	130.799	205.384	115.1	10.0854	9.04654	9.22942	6.13734	7.75443
Smp_017080	Chr_ZW	57041146	25454	Chr_PSA	Sjp_0072430	SJC_S001036	175234	25.856	PSA_shared	PSA_shared	6.59006	6.54032	6.00173	5.74502	6.67579	5.10089	3.44768	0.945294	2.804	3.74817	3.33955	2.69159	8.11487	6.59464	2.85367	4.19908	6.68685	4.23254	3.98758	6.2988	6.48043	5.25537	21.1727	18.8521	21.2575	21.2934	20.5317	17.0006	13.5221	12.678	6.7909	11.6338	11.7538	9.90971	0	10.7716	8.74187	11.5579	2.06167
Smp_017090	Chr_ZW	57019088	4343	Chr_PSA	Sjp_0072440	SJC_S001036	201950	14.582	PSA_shared	PSA_shared	6.75339	6.83516	6.47415	7.64728	7.50241	6.06299	8.96449	9.2049	7.42789	6.72687	6.20566	6.67981	7.17771	6.84896	4.7528	5.75835	6.10814	4.31419	4.21677	4.56003	8.83964	4.73076	90.7736	100.171	91.2552	97.4333	92.2622	79.8623	103.176	68.2307	191.851	64.1638	92.3791	74.6081	11.3433	3.08818	1.79901	1.76107	0
Smp_017230	Chr_2	33471361	40003	Chr_2	Sjp_0036540	SJC_S000258	255857	10.895	Aut_Shared	Aut_Shared	1.28843	1.34049	1.16669	1.06858	1.22727	0.854187	1.30024	0.929574	1.45649	1.53862	1.32499	1.3782	1.04353	0.74357	0.544994	0.634825	0.681064	1.1985	1.03975	0.842669	1.05461	0.748074	13.5914	13.0665	13.6661	11.4965	12.2153	10.9291	14.6018	16.7212	17.9225	15.1956	17.571	16.0827	7.65173	26.0152	20.2738	11.4553	6.46843
Smp_017350	Chr_2	33884435	5902	Chr_2	Sjp_0082540	SJC_S001652	22124	4.636	Aut_Shared	Aut_Shared	15.1396	11.9379	9.22507	11.5276	9.83249	9.15882	2.80726	0.728193	2.60642	5.11309	5.18974	5.23856	4.41979	3.49626	3.5436	2.42216	3.74152	0.373483	0.157776	3.78387	0.643319	2.87572	29.1148	21.8242	21.2766	18.2844	17.8069	17.8053	7.26929	11.7191	3.87422	11.5069	6.70727	12.4019	0	0	0	2.4582	0
Smp_017450	Chr_3.unplaced.SC_0105	705047	18493	Chr_UP	Sjp_0033940	SJC_S000230	128712	3.253	n.a.	n.a.	0.863044	0.866413	1.3432	1.37982	2.11748	1.25162	3.50508	3.90206	4.11731	1.32855	1.27378	1.48512	39.6675	44.8486	40.5328	26.8204	19.7181	28.6071	26.4525	12.2812	41.3821	14.5517	1.80398	5.01218	4.30274	5.79531	8.15238	6.78163	19.7187	6.49023	38.312	8.57186	27.2868	8.88712	385.877	503.108	410.897	165.358	464.689
Smp_017470	Chr_3.unplaced.SC_0105	641982	11685	Chr_UP	Sjp_0010600	SJC_S000040	125969	8.767	n.a.	n.a.	3.57183	4.0916	4.10798	3.82388	3.65116	4.2295	5.2548	4.62083	3.93556	4.15281	4.39094	3.69354	7.80568	6.93536	4.05854	3.26144	3.92689	3.67855	5.04711	5.24679	4.80182	3.44014	28.4334	34.9677	31.8944	28.9403	39.6204	36.1747	53.4417	39.8649	83.0382	42.6384	42.8006	35.712	9.46271	7.52964	9.20714	5.14	3.98197
Smp_017520	Chr_3.unplaced.SC_0105	434198	33785	Chr_UP	Sjp_0051020	SJC_S000481	48541	3.014	n.a.	n.a.	5.73219	5.69571	5.40346	3.30424	4.03304	4.19736	1.83419	0.627241	0.67623	5.30109	5.05566	3.46569	0.301153	0.150527	0.103005	0.186096	0.623908	0.53827	0.459372	0.679723	1.0614	0.667621	25.5438	19.8058	25.5037	19.6289	28.7629	17.0532	12.8221	28.724	5.60709	28.9324	6.91185	20.4854	4.41541	4.69394	6.16545	3.60885	0
Smp_017610	Chr_3	6390072	20029	Chr_3	Sjp_0007180	SJC_S000022	904768	7.751	Aut_Shared	Aut_Shared	1.14235	1.38838	0.973705	0.760061	0.88868	1.35075	0.14859	0.0348435	0.0563473	2.2472	2.72468	3.04904	0.0612466	0.0420138	0.0323652	0.0350735	3.95191	0.0137569	0.0154974	4.99648	0	4.92828	2.92793	2.07362	3.58875	2.16488	2.46781	3.61336	0.450129	6.83533	0.191919	8.11561	0.189263	9.96669	26.0886	0	0	23.0592	0
Smp_017620	Chr_3	6415368	4683	Chr_3	Sjp_0007190	SJC_S000022	919893	1.278	Aut_Shared	Aut_Shared	1.68983	1.80438	1.65768	1.20731	2.37785	1.59293	0.270357	0.105662	0.341743	6.25097	4.7065	7.35604	0.184905	0.171879	0.131139	0.0675035	3.705	0.117676	0	3.95902	0	3.48122	6.00135	0	7.15702	16.5252	7.74879	8.20387	3.32145	69.092	0	39.2099	4.65517	59.1301	46.9302	0	0	41.457	0
Smp_017640	Chr_3	6443574	8758	Chr_3	Sjp_0007010	SJC_S000022	332314	14.246	Aut_Shared	Aut_Shared	6.47305	6.24098	6.17143	7.09903	6.64123	6.07329	8.5615	5.89586	7.06146	6.54539	6.16437	6.36993	8.82011	11.5968	5.69542	4.96505	3.11083	3.33489	2.69356	2.45372	3.03472	2.80492	59.9505	69.0426	59.3507	61.961	60.6528	59.163	79.3583	56.2555	105.809	54.8264	75.2963	58.4611	4.39991	11.2257	13.5159	10.7883	7.452
Smp_017660	Chr_3	6503871	9926	Chr_3	Sjp_0007030	SJC_S000022	386338	11.306	Aut_Shared	Aut_Shared	8.09899	7.29732	6.85105	9.28003	7.97398	6.86803	11.8676	10.5224	10.9837	6.98485	6.9516	7.25259	21.024	19.4618	14.6736	10.9414	8.27766	13.713	14.072	11.9074	9.26542	15.2317	131.697	147.063	108.963	116.252	108.616	106.166	201.051	109.362	328.611	117.894	207.244	120.484	11.2726	107.982	88.3875	89.2299	9.58217
Smp_017730	Chr_ZW	4187203	115299	Chr_Z	Sjp_0131380	SJC_S026027	8633	5.167	S1_mans	S1_mans	10.449	8.62834	10.4039	11.6188	13.6447	17.195	2.63021	0.104537	3.32471	30.6941	34.7161	24.057	2.80598	1.2477	1.96661	3.24621	23.0264	2.32763	2.57096	22.0899	2.14781	18.4141	67.1087	65.2927	55.2332	82.9961	68.7497	103.797	18.6578	187.348	1.11519	223.251	23.7059	163.168	66.9356	17.9738	20.0518	143.396	5.21525
Smp_017750	Chr_ZW	31924567	13039	Chr_PSA	Sjp_0129740	SJC_S024668	585	1.634	S1_jap	S1_jap	15.4635	17.2487	15.6392	48.673	37.1958	34.8846	27.8415	17.2721	23.1649	40.7957	40.8192	37.9563	15.003	16.8104	9.18692	12.545	8.62182	8.15686	8.47469	11.7145	8.12105	11.2012	25.535	74.2757	23.9512	53.1953	27.0429	58.4388	55.8941	71.5124	61.6094	70.2095	49.6291	73.3217	22.8244	26.4096	19.0231	26.4746	13.9581
Smp_017860	Chr_ZW	32427462	6060	Chr_PSA	Sjp_0073360	SJC_S001086	4856	2.975	S1_jap	S1_jap	5.15401	3.1005	3.427	7.11946	6.33316	4.10575	2.9035	1.81561	2.3489	3.30159	3.86392	3.2039	1.8278	2.60816	0.861395	0.765084	0.8755	0.727491	1.38296	1.39065	0.696162	1.80574	9.98284	13.0524	5.66915	12.2171	7.46777	8.01466	5.4373	5.56406	5.98265	6.96464	4.67071	6.04985	7.13626	10.6493	2.00512	1.95235	0
Smp_017880	Chr_ZW	32526758	2212	Chr_PSA	Sjp_0083620	SJC_S001716	15428	1.341	n.a.	n.a.	47.8301	52.3526	55.4904	79.1815	98.9548	90.3267	23.6184	25.7787	13.6789	64.5537	66.7825	66.0151	18.9043	18.5911	16.0564	16.1966	14.8449	4.6089	7.43719	17.3347	4.5773	14.2353	80.327	138.768	87.1261	161.47	99.727	158.003	42.2442	110.89	87.4842	107.511	27.3481	116.389	26.4046	11.2775	19.8592	38.6261	15.1112
Smp_017890	Chr_ZW	32529508	7443	Chr_PSA	Sjp_0131530	SJC_S026054	6575	5.044	n.a.	n.a.	9.2481	8.38156	7.21885	21.3293	18.1546	15.4522	9.90973	5.62204	8.80307	14.9553	14.5748	13.7197	16.6995	13.454	17.1117	19.674	12.4262	8.81067	8.25725	9.90717	12.4131	8.10118	63.7708	111.477	44.4268	91.3754	39.7587	75.3555	47.6612	62.3268	47.4268	61.1159	49.0036	61.9905	12.0347	14.0539	20.94	13.0869	10.1483
Smp_017990	Chr_ZW	32911026	483	Chr_PSA	Sjp_0120770	SJC_S013552	522	1.701	S1_jap	S1_jap	20.8216	27.7159	25.4539	53.5177	57.8837	49.8384	44.6198	78.91	42.023	49.3517	54.4559	61.869	111.451	112.639	175.181	123.844	52.2508	52.4833	52.6969	41.8749	61.1412	55.9462	72.1434	182.923	96.4889	195.559	94.0203	160.834	163.816	161.068	531.398	186.217	171.543	223.79	14.7877	34.968	25.3829	16.385	25.8626
Smp_018020	Chr_ZW	33004570	2213	Chr_PSA	Sjp_0000910	SJC_S000001	1295417	0.407	n.a.	n.a.	169.797	209.007	226.425	386.683	391.746	342.629	241.663	351.027	223.918	279.624	267.329	293.221	98.3101	91.7562	111.543	94.0564	65.1844	52.0445	59.0499	54.551	59.6686	55.4018	102.587	251.391	135.423	258.794	164.115	214.766	203.54	217.271	548.861	205.79	209.199	236.8	73.7814	68.2298	80.8084	87.6054	168.568
Smp_018030	Chr_ZW	33008539	6254	Chr_PSA	Sjp_0120230	SJC_S012773	46	2.705	S1_jap	S1_jap	2.23545	2.74693	3.76907	6.22258	6.89041	6.07451	3.36362	1.59747	1.66841	4.7931	4.10135	4.44082	8.7978	8.41249	5.6136	6.616	7.8185	5.85968	6.15435	7.24286	10.6582	6.5347	12.3336	36.5523	16.6698	35.471	19.1098	30.3482	35.0403	40.7048	27.1636	35.6513	22.323	35.9498	6.37294	16.2404	18.6364	19.0631	0
Smp_018160	Chr_ZW	33505914	62899	Chr_PSA	Sjp_0085980	SJC_S001838	16235	8.189	S1_jap	S1_jap	6.46114	6.78961	5.75612	11.9559	10.9349	10.7607	7.77752	8.44284	7.94669	12.6181	11.3931	12.4846	0.843784	0.741635	0.592871	0.638279	0.528897	0.367973	0.399723	0.696705	0.516452	0.7172	64.3842	128.44	67.5554	109.822	58.6913	110.3	73.102	102.914	144.43	98.4754	79.3069	110.265	24.1174	28.2473	32.1082	27.9944	10.2628
Smp_018220	SC_0186	13152	10070	Chr_UP	Sjp_0130540	SJC_S025402	511	1.101	n.a.	n.a.	40.799	45.1472	40.5278	76.1852	93.6601	73.6965	33.0557	14.5952	39.8005	47.6986	50.2608	42.2187	16.7822	10.6636	12.79	15.8461	12.9296	14.5293	11.2199	10.3563	20.7795	10.6006	25.0572	48.0652	24.771	57.9516	27.777	44.3941	21.5318	29.4171	17.894	29.472	29.7942	25.8863	21.5651	4.68768	6.0553	4.89881	12.2171
Smp_018250	Chr_3	4362665	26369	Chr_3	Sjp_0026420	SJC_S000159	335405	25.192	Aut_Shared	Aut_Shared	35.379	47.0601	58.719	29.6437	37.6605	45.6346	18.7671	5.04938	7.28144	55.5262	52.7453	48.5076	20.9453	13.1825	14.8575	17.2658	113.174	8.24449	7.93386	79.2668	10.4953	83.8105	1171.76	987.373	1511.49	1200.85	2037.8	1569.36	620.76	1715.7	291.781	1588.28	269.24	1520.93	189.938	46.932	47.2595	420.568	18.173
Smp_018260	Chr_3	4332920	17328	Chr_3	Sjp_0026410	SJC_S000159	301735	23.291	Aut_Shared	Aut_Shared	8.84574	9.8568	10.2555	6.54031	7.69803	8.55328	4.39108	2.57421	3.20031	7.42223	8.46487	7.42797	7.96009	6.15058	8.26763	9.61824	9.80612	4.94529	3.54679	11.3318	3.55457	10.8517	60.794	46.9808	67.8764	53.7337	74.9827	61.3887	30.1156	46.8763	32.6172	53.4203	24.4033	50.8787	51.8005	22.4826	28.1456	58.8315	19.8157
Smp_018280	Chr_3	4243507	21499	Chr_3	Sjp_0026390	SJC_S000159	227912	33.208	Aut_Shared	Aut_Shared	1.07304	1.20364	1.11243	0.844781	1.08593	0.954584	1.06474	0.536761	1.00393	0.603389	0.491059	0.452166	6.68931	5.38956	5.78922	7.83064	2.40111	5.57508	3.92707	2.65571	5.72991	2.57612	11.2449	9.74192	12.9742	12.0834	13.0436	9.68551	15.3816	7.84126	14.9933	6.73327	17.9415	6.69942	0	17.0218	25.4843	8.71444	15.4293
Smp_018310	Chr_3	4182610	387	Chr_3	Sjp_0026360	SJC_S000159	187782	0.366	Aut_Shared	Aut_Shared	133.352	151.913	137.833	152.914	167.167	110.45	312.16	356.407	275.255	190.719	175.663	199.065	138.725	177.829	125.011	101.47	486.127	297.609	283.127	215.038	354.287	240.057	177.636	189.026	168.546	178.516	167.415	135.594	397.555	228.391	819.983	217.176	399.288	240.334	867.62	263.172	232.133	118.578	662.141
Smp_018360	Chr_3	4079611	17028	Chr_3	Sjp_0026320	SJC_S000159	86640	7.306	Aut_Shared	Aut_Shared	2.74901	2.73547	2.82719	2.22708	2.27383	2.76653	2.4119	1.10897	2.21184	2.99354	2.30519	3.25263	6.55146	8.52573	3.3	3.17249	18.703	8.33343	8.33049	18.2127	10.1331	15.8167	13.0307	12.2617	13.4209	13.2288	14.0207	15.9237	15.7349	17.5021	12.3461	14.5411	15.9273	20.9117	56.5842	47.2463	48.495	51.7242	47.8652
Smp_018400	Chr_3	3822998	12110	Chr_3	Sjp_0058680	SJC_S000639	51479	16.411	Aut_Shared	Aut_Shared	1.5265	1.79547	1.51682	1.77781	1.9505	1.36454	1.92994	1.90899	1.75647	1.54816	2.04435	1.82993	3.52454	4.36261	3.73016	3.42542	1.79981	2.43456	2.8451	2.0181	2.33407	2.30515	25.5473	26.8599	30.4669	30.4593	25.6747	22.5021	33.8173	23.0444	61.5274	31.9122	34.1174	30.1665	23.2239	13.5974	35.7826	19.0221	29.6273
Smp_018430	Chr_3	3795638	2884	Chr_3	Sjp_0058700	SJC_S000639	90037	3.293	Aut_Shared	Aut_Shared	17.707	18.2849	19.662	16.016	17.9645	17.4865	16.683	18.5352	11.3619	15.3513	14.6126	14.7897	9.90814	14.995	7.00342	6.75936	11.2865	11.1782	10.3322	8.25492	10.9711	9.91168	68.5413	60.1503	73.7439	66.3305	76.9554	68.4899	70.7142	61.1122	143.279	56.4194	54.6113	61.247	30.8439	30.7834	34.9104	14.1323	0
Smp_018440	Chr_3	3715725	8254	Chr_3	Sjp_0111310	SJC_S007530	814	1.1	Aut_Shared	Aut_Shared	7.26412	5.82323	4.09258	6.50331	4.97274	3.96578	0	0	0.132348	4.04795	4.6175	1.6618	0.848007	0.354609	0.214943	0.259581	1.33768	2.80411	2.55719	0.816799	2.35113	0.784632	4.48495	3.32293	3.20917	1.92106	2.60588	1.83928	0.0827399	2.32353	0	2.75265	0.115964	1.28885	2.12868	6.77373	5.91455	1.73377	0
Smp_018460	Chr_3	3661663	27641	Chr_3	Sjp_0033240	SJC_S000222	34309	25.869	Aut_Shared	Aut_Shared	8.65711	8.14157	8.01023	7.04346	7.70619	7.18375	5.37817	3.1059	4.4515	5.59917	5.84902	5.21391	3.51646	3.16747	1.52563	1.70532	1.769	2.42233	2.16731	1.88266	2.97621	1.72899	36.1685	29.3672	33.5811	32.0229	35.2915	30.5065	29.1579	28.2828	30.3978	29.1338	26.6783	28.1458	6.26544	19.2918	18.3199	6.81456	10.5707
Smp_018480	Chr_3	3648518	2319	Chr_3	Sjp_0033250	SJC_S000222	65850	2.038	Aut_Shared	Aut_Shared	4.66254	7.41761	9.61541	3.64778	6.26269	6.99233	4.52098	3.31296	4.35748	5.65493	5.77158	5.25354	7.57688	7.41516	4.34015	4.7408	3.58636	3.92097	5.08629	2.81637	3.27457	2.60013	5.8914	5.34924	9.36786	7.20998	12.995	9.28397	6.88347	7.34782	9.26803	7.77605	7.48952	7.35661	5.75268	14.6966	1.61136	3.14099	0
Smp_018490	Chr_3	3634403	12737	Chr_3	Sjp_0076030	SJC_S001246	76601	11.719	Aut_Shared	Aut_Shared	2.96694	2.64552	2.62125	1.79538	2.55856	1.9605	1.39555	0.403299	1.03109	1.50866	1.50557	1.30358	1.15856	1.53965	0.262508	0.432953	1.00196	0.519188	0.194958	0.6451	0.927414	0.771468	17.0398	10.0177	14.0348	14.6275	15.0369	11.3116	8.88792	8.32685	5.35158	8.88308	7.79741	7.85096	2.79097	2.36986	0	0.758499	0
Smp_018530	Chr_3	3573026	1041	Chr_3	Sjp_0128260	SJC_S023065	611	0.503	Aut_Shared	Aut_Shared	230.987	210.377	197.689	272.169	235.62	189.064	421.534	522.426	441.958	219.487	206.21	256.986	756.945	739.572	791.4	679.745	414.751	604.805	591.574	514.463	538.589	563.777	4.25173e-05	0	0.00874263	0	9.17841e-09	0	0	0	0	0	0	0	620.968	579.541	590.464	483.895	538.944
Smp_018550	Chr_3	3442534	13858	Chr_3	Sjp_0033320	SJC_S000222	220124	23.794	Aut_Shared	Aut_Shared	3.36729	4.36118	4.49073	3.36609	3.51647	4.36346	3.94491	2.47439	3.82404	5.91684	5.96025	6.30515	10.3568	8.82063	3.52308	3.63967	18.532	9.28531	9.07136	26.7725	7.42801	23.5602	65.451	64.4855	83.8673	65.8267	88.2545	86.1403	85.1645	116.769	103.785	125.585	89.8366	132.062	41.077	66.9676	68.8521	180.343	77.3396
Smp_018580	Chr_3	3383043	12041	Chr_3	Sjp_0033290	SJC_S000222	172674	7.291	Aut_Shared	Aut_Shared	4.35416	4.99019	3.4323	4.52103	4.11243	3.47026	3.47522	1.70392	2.47596	3.70023	3.6299	4.53081	2.53795	1.84742	1.74259	2.10028	1.13133	0.823797	0.618681	1.62723	0.910948	1.39101	11.3275	11.7069	12.9129	10.0913	8.8185	8.71018	9.7726	9.44519	8.84441	8.80582	7.8175	12.2584	2.82557	4.19881	1.57261	6.14354	4.76271
Smp_018610	Chr_3	3326488	10953	Chr_3	Sjp_0033270	SJC_S000222	117213	4.345	Aut_Shared	Aut_Shared	22.3167	24.6492	20.8133	21.2742	22.9403	19.8791	19.403	10.4735	16.4848	16.9694	17.7809	19.0821	20.1134	15.2219	21.4215	19.3564	11.3112	7.19471	6.48964	12.4259	7.89594	16.9842	68.4707	71.1814	81.1566	72.264	69.7528	62.9723	66.6351	51.7086	62.504	54.7222	63.8316	63.6976	13.3896	7.04437	7.46615	13.7947	8.09037
Smp_018640	Chr_3	3258615	8391	Chr_3	Sjp_0095380	SJC_S002758	1314	11.685	Aut_Shared	Aut_Shared	3.27128	3.81537	3.37674	2.76093	3.10348	2.46398	1.56717	0.912952	1.68196	1.64754	1.36124	1.50851	3.08726	3.69748	1.81345	1.79577	2.27282	1.6747	1.62764	3.86666	1.05582	3.32682	16.6316	14.8621	22.5455	17.1325	18.6162	13.2487	9.07231	8.88499	10.4467	7.74639	11.0447	8.47337	29.9766	10.6286	6.98536	17.7108	0
Smp_018690	Chr_3	3102368	1345	Chr_3	Sjp_0083570	SJC_S001714	8325	0.65	Aut_Shared	Aut_Shared	25.2507	28.7757	24.8517	22.6586	20.2593	18.7917	8.6822	2.07748	3.80755	12.2904	11.5157	15.2666	3.27265	1.57772	1.47126	1.20128	3.51819	1.43402	1.15389	2.97619	2.50929	2.9887	14.0218	11.507	16.0103	11.227	14.0599	8.36042	5.44875	9.27356	2.11196	7.92821	3.7658	10.5718	0	0	2.5556	4.96973	0
Smp_018710	Chr_3	2961893	7293	Chr_3	Sjp_0043580	SJC_S000358	147564	3.943	n.a.	n.a.	31.7121	32.6207	32.1699	33.6528	32.01	32.49	31.3707	35.4799	24.8853	31.7526	32.1704	32.717	14.9998	9.59693	13.0287	13.389	8.88708	5.5916	5.66061	11.5265	6.65234	10.3501	87.4172	89.1739	85.6716	85.1622	95.6608	86.8443	95.1334	89.5805	191.371	91.1974	80.6986	96.8966	3.49968	7.05047	6.31522	12.3447	0
Smp_018720	Chr_3	2954189	5227	Chr_3	Sjp_0043590	SJC_S000358	153799	7.691	n.a.	n.a.	0.870468	0.66629	0.395964	0.60185	0.658539	0.378135	0.209649	0.052673	0.283934	0.255421	0.208552	0.237677	0.358933	0.503969	0.110963	0.120956	0.246898	0	0.237534	0.0403067	0.403553	0.213624	8.02209	6.74277	5.92236	6.66191	5.17896	2.61101	1.90278	2.41885	1.35213	3.17651	3.8521	3.52857	0	2.51086	0	0	0
Smp_018730	Chr_3	2937322	15249	Chr_3	Sjp_0111130	SJC_S007448	2144	6.403	Aut_Shared	Aut_Shared	1.48403	1.36054	0.579009	1.11723	1.01249	0.635879	0.503642	0.084358	0.363786	0.961309	0.584509	0.326272	0.586776	0.801362	0.161092	0.158934	0.592415	0.198761	0.305329	0.17961	0.497983	0.322191	5.31128	4.14736	5.27839	4.46877	2.09544	2.31934	1.71472	3.56693	0.696285	2.01548	1.71662	1.63534	0	1.15147	0	0.491122	0
Smp_018790	SC_0170	505919	21999	Chr_UP	Sjp_0043650	SJC_S000358	338980	17.397	n.a.	n.a.	4.82891	5.31678	4.97753	4.75701	5.46164	7.84023	2.82022	0.861585	3.02931	5.57065	4.802	4.88595	6.88988	5.84084	2.59464	3.40083	19.4567	8.25397	7.6333	15.3423	11.7747	11.2783	31.0569	30.5131	33.3124	33.9122	33.8774	48.9207	20.5965	36.2687	11.7931	31.9101	24.7826	34.6775	33.9669	32.634	41.6251	47.7271	20.1566
Smp_018870	Chr_3	23844919	14766	Chr_3	Sjp_0067550	SJC_S000872	19450	4.031	Aut_Shared	Aut_Shared	1.0715	1.46195	2.13506	0.313175	0.502587	0.793615	0.714289	0.368493	0.288926	0.747246	1.06109	1.61957	0.449591	0.436087	0.164051	0.266418	0.553527	3.32152	2.20721	0.656333	4.31417	0.756205	3.54015	1.26237	4.22187	1.18159	9.97298	3.07962	3.91859	3.89042	3.41745	4.77884	1.99712	7.13462	2.46516	12.5434	6.13415	1.33166	4.17787
Smp_018920	Chr_3	24062707	569	Chr_3	Sjp_0080380	SJC_S001507	2446	0.593	Aut_Shared	Aut_Shared	5.09856	7.34532	2.90268	4.02116	3.07477	2.94257	0.388439	0	0	2.20848	2.93025	1.32111	0.951133	0.2572	0	0.37038	1.76406	0.484248	0	2.59188	0	0.784965	3.41386	2.23178	4.88552	1.56672	1.76316	1.40003	0.56682	1.76863	0	2.02768	0	1.26135	0	0	0	0	0
Smp_018940	Chr_3	24078458	2745	Chr_3	Sjp_0071450	SJC_S001011	29142	1.705	Aut_Shared	Aut_Shared	2.02661	3.75692	4.03821	2.63259	6.05996	3.66728	2.22914	1.98	2.56157	3.76375	3.76299	2.52716	2.14243	2.97226	1.18077	0.6014	1.09699	0.301134	0	1.53503	0	0.894917	6.71838	7.21557	9.15672	14.0949	10.2236	10.8241	5.31184	8.01093	8.49294	7.12574	7.4448	7.0923	0	0	0	16.4346	0
Smp_018950	Chr_3	24087355	13860	Chr_3	Sjp_0071460	SJC_S001011	39924	10.697	Aut_Shared	Aut_Shared	2.68512	3.42523	2.97071	3.86827	3.90148	3.47999	4.96348	3.09281	4.32787	2.74242	2.68654	3.00273	5.51607	5.45633	2.23269	2.96504	2.214	2.92236	1.90359	1.8697	4.26136	2.04632	8.94441	14.145	12.0891	12.9792	10.1189	12.3435	21.8755	11.1311	25.6291	10.8781	19.823	12.7994	0	10.5242	18.6672	6.3409	0
Smp_018980	Chr_3	24342700	46447	Chr_3	Sjp_0097900	SJC_S003256	1337	14.429	Aut_Shared	Aut_Shared	0.329276	0.142059	0.192705	0.184703	0.154447	0.131011	0.015964	0.00935866	0.0403583	0.127069	0.129691	0.0271474	0.400824	0.323749	0.209349	0.231404	0.169798	0	0.00668283	0.172368	0	0.081738	4.62004	3.02031	2.75486	2.12028	2.05057	2.36836	0.639241	2.49325	0.681375	2.40109	0.447963	0.889069	0	0	0	1.87947	4.65242
Smp_018990	Chr_3	24462605	768	Chr_3	Sjp_0075950	SJC_S001243	77896	0.596	Aut_Shared	Aut_Shared	1359.17	1261.76	1181.22	1369.02	1232.21	925.415	2472.72	4078.5	2779.02	818.519	805.576	849.361	1143.98	1166.82	1864.01	1357.64	275.583	1087.44	1048.4	342.36	695.433	540.859	875.154	888.421	812.964	783.055	794.658	601.18	1824.16	544.337	5522.57	546.567	2301.19	615.282	383.973	1302.39	1325.11	304.099	702.536
Smp_019010	Chr_3	24497703	6951	Chr_3	Sjp_0090260	SJC_S002278	13706	8.008	Aut_Shared	Aut_Shared	34.8967	33.0196	30.3074	36.4156	33.2932	30.6513	45.7783	39.6609	43.8675	29.0284	28.6591	29.6423	84.5388	54.2616	98.4911	118.622	35.4201	43.9607	43.0475	34.7956	45.8836	35.0518	80.5406	81.2954	73.3784	68.6089	71.4834	67.345	112.079	65.4639	175.904	64.5523	118.289	71.6678	24.8166	63.1835	73.3618	42.8837	53.1465
Smp_019030	Chr_3	24556997	9476	Chr_3	Sjp_0043440	SJC_S000355	70363	13.783	Aut_Shared	Aut_Shared	20.6982	22.6237	21.6243	20.4555	19.6522	23.59	33.0901	31.7138	38.12	35.9642	36.5413	42.4307	40.0775	31.4516	18.2652	26.5175	53.9614	104.533	108.718	80.1511	96.0748	69.9474	133.352	130.804	138.723	120.075	140.463	149.341	228.861	223.862	394.631	228.184	282.115	281.638	40.6383	199.35	214.662	118.166	88.5287
Smp_019040	Chr_3	24584826	26149	Chr_3	Sjp_0043450	SJC_S000355	95302	56.698	Aut_Shared	Aut_Shared	3.48139	3.16334	3.84157	3.04789	1.41141	2.30308	1.19036	0.421556	2.3443	1.1988	0.926491	1.1929	1.3094	1.13752	0.692824	0.925491	0.965127	1.12748	0.961497	1.0313	1.30681	0.990685	38.7838	30.8062	32.644	18.3434	37.0799	25.8641	29.8635	32.1162	18.6869	23.5463	51.5813	29.7841	4.95329	2.28125	3.90203	4.89037	0
Smp_019050	Chr_3	24636496	625	Chr_3	Sjp_0043470	SJC_S000355	177342	0.198	Aut_Shared	Aut_Shared	178.876	199.284	200.616	190.565	208.732	182.132	388.56	643.808	371.309	285.076	311.884	298.728	247.362	358.14	200.396	138.587	112.42	128.29	127.139	128.432	114.75	104.336	0	0	0	0	0	0	250.262	206.44	938.251	222.271	302.374	249.65	6.80227e-07	111.57	114.947	79.5298	0
Smp_019060	Chr_3	24640708	3806	Chr_3	Sjp_0043480	SJC_S000355	182361	2.257	Aut_Shared	Aut_Shared	29.6622	34.7381	28.5698	34.6163	33.9301	30.474	84.3506	227.533	103.269	28.1422	29.7888	36.8511	75.2591	92.9376	129.686	87.0264	36.8843	39.9623	40.1249	31.9401	57.5283	21.8276	278.113	269.966	269.355	301.681	239.395	260.367	810.653	248.385	4060.91	266.301	1175.39	366.396	13.9678	98.9877	155.501	92.7188	48.7181
Smp_019130	Chr_1.unplaced.SC_0010	2188350	22985	Chr_UP	Sjp_0062400	SJC_S000724	119783	8.353	n.a.	n.a.	17.8394	15.4905	15.0905	16.1879	16.6624	12.9344	19.0689	17.3948	14.3265	11.1161	12.0175	11.9268	2.48641	2.37014	2.35271	2.70023	1.32881	1.29467	1.47197	1.20993	1.61518	1.09791	81.1472	71.3825	70.5878	70.6482	72.264	60.195	81.3019	43.4827	138.404	48.7648	67.1102	51.6606	14.0129	4.06227	2.79461	3.4136	10.7458
Smp_019190	Chr_1.unplaced.SC_0010	1986946	7786	Chr_UP	Sjp_0087170	SJC_S001937	2480	6.998	n.a.	n.a.	19.6889	20.1375	16.1772	21.3067	19.165	15.1272	14.45	9.47452	11.6083	10.5175	9.98951	8.75068	14.5412	12.2974	11.3186	14.684	17.4038	15.0756	13.2754	15.7214	17.0679	14.6281	57.0472	61.3365	57.2119	53.7789	49.3545	44.6658	47.8132	32.2272	57.1716	29.5835	41.9296	28.71	19.0241	26.2392	25.783	31.6474	0
Smp_019200	Chr_1.unplaced.SC_0010	1967238	473	Chr_UP	Sjp_0073950	SJC_S001137	4421	0.425	n.a.	n.a.	1.01628	0	0.623091	0.990123	0.953379	0.684292	4.60688	6.9901	3.76802	5.85482	10.6932	17.5117	0	0	0.216393	0	1.81894	0	0	6.23586	0	5.66569	0	0	0	1.0905	0	0	3.94527	4.10343	11.2142	9.17369	2.76474	12.4376	0	0	0	0	0
Smp_019260	Chr_1.unplaced.SC_0010	1729756	12441	Chr_UP	Sjp_0070790	SJC_S000986	40483	5.033	n.a.	n.a.	5.70688	6.15991	5.73509	5.65752	5.51465	5.9228	7.04808	6.1441	6.68182	5.51642	4.96628	5.91494	8.74948	9.89586	6.13746	6.51893	6.6504	5.75835	5.91305	7.46815	5.86643	7.71873	23.8204	24.5463	27.4445	24.2725	26.3253	24.9738	31.7295	22.4271	51.6841	20.6228	33.8226	25.4835	29.1539	17.2815	22.5745	25.3451	19.4892
Smp_019340	Chr_1.unplaced.SC_0010	1456136	6102	Chr_UP	Sjp_0100260	SJC_S003742	983	9.539	n.a.	n.a.	6.52024	7.09116	5.91313	5.57305	5.96799	6.4177	11.446	11.8629	10.4696	10.6676	10.9297	12.2371	23.0361	31.1785	22.9858	17.9363	16.4025	10.5663	12.2084	22.0627	15.4176	17.1646	80.3727	63.6354	96.3824	73.3611	78.9844	82.4023	151.487	128.001	280.798	130.748	149.279	158.104	93.2193	33.4923	45.7023	62.0391	79.2864
Smp_019380	Chr_1.unplaced.SC_0010	1369882	6130	Chr_UP	Sjp_0002730	SJC_S000006	429640	5.484	n.a.	n.a.	12.1684	10.6058	9.48867	13.684	13.2993	10.4207	9.59767	5.02322	9.58339	8.23892	8.11639	7.35705	23.4253	23.4263	21.5339	22.5586	12.2808	14.114	9.92462	12.1667	10.6673	13.3338	25.4075	28.9543	21.9293	26.8595	20.9342	23.1773	23.1992	18.3814	22.6288	18.6141	25.9965	17.6549	6.63384	19.2349	12.2904	11.4081	11.161
Smp_019430	Chr_1.unplaced.SC_0010	1299224	1123	Chr_UP	Sjp_0002800	SJC_S000006	676772	0.806	n.a.	n.a.	210.333	228.565	232.451	270.963	245.323	226.056	299.79	238.072	279.244	269.888	280.43	323.67	189.169	164.754	168.342	166.676	107.513	134.702	148.703	159.654	111.949	167.442	119.544	153.982	130.927	139.243	143.9	132.341	208.182	169.418	299.885	173.492	208.683	216.339	71.7323	109.014	108.921	82.4492	113.063
Smp_019440	Chr_1.unplaced.SC_0010	1278742	624	Chr_UP	Sjp_0002810	SJC_S000006	692090	0.361	n.a.	n.a.	373.892	481.215	418.86	430.905	439.98	398.775	786.743	1189.14	714.202	529.294	525.402	561.703	474.123	378.122	437.52	393.741	145.92	235.796	215.885	231.954	158.879	305.995	304.216	344.864	355.079	350.52	346.134	314.848	769.001	504.861	2215.96	481.842	758.973	538.757	45.3906	136.101	157.77	93.7644	19.6376
Smp_019610	Chr_ZW	28267764	1349	Chr_Z	Sjp_0113790	SJC_S008078	446	4.231	S0	S0	5.81883	4.72354	4.91323	7.82395	7.51763	7.66411	4.927	4.30864	5.67741	7.64544	7.48724	7.93109	22.8674	21.6429	34.2698	33.2496	25.9361	12.6637	12.6552	32.4849	8.13101	39.4001	43.1778	49.0717	26.1423	54.2642	33.45	45.4032	63.2344	78.0055	94.8337	74.9642	70.0764	89.993	0	94.1984	141.528	155.249	72.2796
Smp_019630	SC_0187	243174	10762	Chr_newZ	Sjp_0113330	SJC_S007954	388	7.65	n.a.	S0	2.65363	2.34451	2.50967	4.5839	4.52855	5.1512	3.31214	2.78898	3.0068	4.57086	4.56032	4.8985	14.4493	12.191	23.0127	25.5746	8.26087	7.83445	6.4606	11.4131	4.86084	11.7036	23.3781	37.4328	17.3745	37.6289	22.0921	39.6001	33.1903	38.8116	50.3687	38.4368	28.9094	45.901	23.1317	42.6009	49.4647	51.423	39.1125
Smp_019680	SC_0187	380931	12542	Chr_newZ	Sjp_0075020	SJC_S001183	1036	6.547	n.a.	S0	47.5	50.6808	54.4229	87.4127	92.7094	94.4389	39.0005	24.8745	23.7709	91.8761	93.9347	90.1245	7.66642	10.5892	11.5232	12.0507	15.6746	7.73314	8.48878	16.8822	7.1983	17.1115	118.391	219.215	124.299	227.128	142.625	236.011	103.557	224.143	114.501	228.61	69.7071	230.261	10.0136	13.5806	10.2687	25.5113	5.03569
Smp_019690	SC_0187	396372	1839	Chr_newZ	Sjp_0119490	SJC_S011451	36	1.36	n.a.	n.a.	88.9248	122.459	111.085	4.12551	1.19172	3.52838	136.682	149.533	124.816	0.481482	0.0982828	0.768058	154.736	138.329	441.067	441.718	142.379	97.5393	91.3132	175.397	119.061	162.604	50.717	2.49644	70.8724	0.766725	64.7911	2.12069	93.7845	0.343465	185.149	0.0708791	94.7874	0.367429	106.522	65.9639	51.0675	126.284	84.8225
Smp_019730	SC_0187	516600	3511	Chr_newZ	Sjp_0057070	SJC_S000598	43605	3.383	n.a.	S0	27.3222	34.688	38.904	52.8646	57.4902	62.8414	35.6444	55.8426	33.0928	61.049	67.2472	72.29	53.6622	54.5831	112.373	87.7258	118.316	37.6696	32.8875	106.632	45.1793	104.569	132.581	288.913	155.409	293.307	206.3	340.017	292.881	420.078	798.18	506.136	291.823	578.482	1616.65	70.6143	43.3671	120.614	676.38
Smp_019750	SC_0136	36657	785	Chr_newZ	Sjp_0096720	SJC_S002991	21490	0.637	n.a.	S0	419.376	508.824	574.317	804.611	871.436	885.027	512.036	642.11	467.144	737.463	791.076	802.686	378.859	315.252	1090.6	1031.09	424.15	247.106	243.968	474.775	184.335	540.81	382.652	735.297	453.206	744.235	527.423	825.327	526.054	691.552	1235.1	768.428	542.355	818.797	0	0	0	24.7652	0
Smp_019820	SC_0136	368698	7696	Chr_newZ	Sjp_0064000	SJC_S000779	6751	7.737	n.a.	S0	3.54491	4.73565	4.24414	8.24889	7.72456	8.04399	4.98677	7.06858	5.3815	7.32932	6.73765	7.35795	5.74761	5.75709	10.0412	10.1229	2.38491	1.75433	1.93595	3.94209	1.42525	3.16296	30.4396	72.2357	38.1164	62.8635	37.3377	69.9066	56.6053	72.3665	135.038	71.2343	68.0014	79.4775	209.399	16.0901	9.43956	57.3924	100.522
Smp_019840	SC_0136	392074	18501	Chr_newZ	Sjp_0086130	SJC_S001848	28886	14.286	n.a.	S0	6.28864	5.45229	5.16244	8.75812	9.23198	7.87826	3.99869	1.55964	4.37176	6.70124	5.66058	5.5021	3.66237	3.88392	5.57845	7.71934	4.88284	3.76795	3.43935	5.79632	3.83087	5.60087	39.162	54.7505	34.2335	55.4119	33.4977	49.624	28.2802	42.6445	20.6005	36.7363	35.1215	38.8163	0.0149645	3.96168	0	0	0
Smp_019860	Chr_1	17350673	19993	Chr_1	Sjp_0112910	SJC_S007868	16629	1.806	Aut_Shared	Aut_Shared	72.1063	73.7737	67.3031	71.9201	72.3546	70.049	89.9821	88.0052	52.3162	65.3365	66.6103	70.0565	3.44681	3.82099	3.91812	3.38366	0.939551	0.868246	0.76074	0.800876	1.07616	0.882433	131.195	130.343	135.041	126.845	121.053	127.538	161.224	108.287	290.548	115.71	113.1	126.152	48.2057	5.79234	4.26666	10.1546	34.485
Smp_019900	Chr_1	17420554	11047	Chr_1	Sjp_0065100	SJC_S000808	123227	17.896	Aut_Shared	Aut_Shared	13.9138	13.8591	13.584	11.0985	13.3583	14.5038	8.53364	3.39552	5.4504	13.8749	15.2442	12.0968	13.3939	8.84282	5.70744	7.5514	15.5114	3.79122	3.39985	12.2439	7.94332	10.9165	104.615	83.297	107.695	98.9021	104.012	111.384	61.6969	92.6128	44.525	102.727	43.5697	87.3547	35.8718	9.00348	17.2592	32.8151	11.0081
Smp_019920	Chr_1	17471202	5730	Chr_1	Sjp_0064390	SJC_S000791	154272	4.099	n.a.	n.a.	16.1746	16.5647	17.6047	13.9617	17.3482	18.0213	23.4334	18.9097	21.9848	22.7484	24.7503	24.2409	7.26	8.56245	5.35289	4.00282	2.52752	3.41416	3.41275	3.27239	2.42964	2.96204	83.5558	83.5584	93.7265	98.7133	105.482	106.87	136.214	126.435	194.728	134.635	146.632	138.313	14.7737	6.27783	3.0894	8.04113	6.24199
Smp_019940	Chr_1	17494232	10041	Chr_1	Sjp_0065040	SJC_S000808	1891	19.575	n.a.	n.a.	4.01581	4.71213	4.45753	4.06292	5.11269	4.16736	3.52429	2.33856	2.98974	4.75013	5.14173	4.60913	13.2087	13.2158	6.77535	8.70325	15.4517	11.443	10.9123	15.0443	11.9323	16.0581	53.9722	57.4313	60.4046	62.4953	63.3621	59.4782	49.264	58.8865	57.8015	69.1446	46.1165	61.8702	25.4583	24.7312	24.2001	30.6314	7.20581
Smp_019980	Chr_1	17330403	14540	Chr_1	Sjp_0051720	SJC_S000489	203040	16.839	n.a.	n.a.	1.80833	2.22153	1.93432	2.45732	2.22577	2.0725	3.00942	2.45389	2.93085	2.45765	2.6036	2.65963	10.3276	9.45619	8.14937	9.28838	11.9428	11.6923	11.0582	13.4611	12.9116	13.8079	56.9858	77.8276	78.0524	67.8411	60.4655	62.4741	95.2409	66.9053	143.79	75.4017	101.098	86.8609	55.8124	64.0364	48.7628	59.7459	18.8665
Smp_020050	Chr_1	17238072	3245	Chr_1	Sjp_0051650	SJC_S000489	72038	7.856	Aut_Shared	Aut_Shared	14.0473	13.6656	13.5508	14.5517	13.6162	12.4385	15.2175	8.97261	12.7681	13.9365	14.0709	15.0913	79.7421	58.505	54.8832	58.9915	60.6271	53.2394	41.8965	70.3142	43.2925	70.8163	51.7369	52.5527	49.9811	49.552	52.8908	46.2866	58.8402	48.1822	62.1598	51.2626	54.366	55.9183	198.329	46.4332	58.9261	71.8101	187.971
Smp_020060	Chr_1	17223554	15876	Chr_1	Sjp_0051640	SJC_S000489	55368	16.102	Aut_Shared	Aut_Shared	9.40182	9.37242	8.06677	8.35402	8.61857	8.56108	10.1353	5.85363	9.45718	9.62987	9.52138	9.94153	11.8061	8.77335	8.29526	9.81428	7.09015	6.64719	7.31221	5.494	9.64603	6.00647	80.5813	77.8157	78.8627	72.5858	74.9085	76.046	91.4593	78.4865	96.5224	78.5547	92.9655	85.7258	282.992	36.4647	42.7664	60.2666	123.392
Smp_020070	Chr_1	17152354	39576	Chr_1	Sjp_0120910	SJC_S013669	18856	8.045	Aut_Shared	Aut_Shared	41.4203	35.0653	33.7066	56.3685	52.6314	51.1879	13.0562	1.69529	17.1008	61.9571	57.5198	46.6773	16.1372	11.3774	6.59584	7.54832	25.0292	3.53681	3.1137	19.1912	7.16342	17.2672	135.875	182.286	116.478	162.138	115.367	169.596	56.2151	240.732	12.4809	222.529	81.656	194.98	32.0875	15.2123	15.2007	69.1547	9.51744
Smp_020090	Chr_1	17101131	11896	Chr_1	Sjp_0070660	SJC_S000982	89250	7.497	Aut_Shared	Aut_Shared	6.13573	6.66444	6.58767	5.46326	5.78297	6.09035	7.18961	6.3042	5.82564	6.13152	5.52701	5.36421	2.13518	1.63619	1.09558	1.46745	1.50673	2.80262	3.39204	1.34599	3.75913	1.33288	36.5979	32.3021	39.7621	35.8985	41.5794	36.2151	50.1429	37.709	75.2186	35.3822	47.8423	38.8066	13.7048	16.5144	16.5908	3.73466	0
Smp_020120	Chr_1	16847871	3624	Chr_1	Sjp_0079170	SJC_S001389	17582	2.447	Aut_Shared	Aut_Shared	21.5342	25.2348	25.9727	25.1071	27.901	27.8107	37.6533	59.1024	33.1978	30.7204	30.0977	34.2566	12.0265	16.2944	12.5306	9.79876	7.43869	6.69075	6.08119	6.91812	7.33391	6.22395	82.9312	100.497	106.942	96.5416	107.079	113.828	202.997	155.246	606.175	149.775	203.969	169.4	42.2167	17.998	23.7185	19.2466	36.0405
Smp_020130	Chr_1	16837382	2838	Chr_1	Sjp_0079180	SJC_S001389	25473	2.576	Aut_Shared	Aut_Shared	30.6	19.3957	20.3545	28.4238	19.9762	14.7896	3.66619	0.314525	2.14757	9.3545	9.75502	6.79206	14.7726	6.96154	8.54753	9.65362	10.7115	0.485443	0.984347	5.4935	1.18922	7.86901	17.7491	17.4976	12.308	11.5027	12.7033	8.52695	2.54211	5.6471	0.334527	6.16362	1.58351	4.53956	7.44628	1.18444	2.58467	4.04161	0
Smp_020210	Chr_1	16382503	10702	Chr_1	Sjp_0043770	SJC_S000360	83087	11.136	Aut_Shared	Aut_Shared	11.6552	12.9307	11.2836	9.78698	10.5517	10.172	17.9129	17.5343	19.309	9.85515	10.1065	10.0483	13.1481	10.8065	11.4864	13.906	5.02451	10.7105	10.6153	7.81547	9.26373	7.76266	40.3329	35.5609	45.6309	36.6924	42.8597	37.2773	66.4531	33.3669	116.989	34.1743	77.6328	36.5301	5.77479	38.6185	41.7883	24.3294	19.4713
Smp_020220	Chr_1	16395297	3604	Chr_1	Sjp_0043790	SJC_S000360	96565	4.498	Aut_Shared	Aut_Shared	37.3057	35.8301	37.7969	40.7268	41.8428	36.8541	84.9835	127.741	82.5335	47.1094	44.4261	49.7837	37.7415	35.2061	48.8671	40.3092	23.554	29.7403	32.3833	24.3186	33.7125	21.8117	311.912	327.97	283.503	324.288	301.917	293.034	551.229	293.505	1530.56	269.007	586.265	322.817	5.14287e-05	105.307	116.697	83.871	0
Smp_020400	Chr_1	15975452	6024	Chr_1	Sjp_0046580	SJC_S000409	76274	9.558	Aut_Shared	Aut_Shared	3.45699	4.58401	4.12819	3.31664	3.83651	3.60563	3.69929	2.7691	3.5794	3.48029	3.31434	3.53814	6.14504	5.20499	4.11183	4.32057	5.09396	4.84843	4.94657	5.31604	5.60258	5.96861	13.8168	13.724	18.2657	14.6481	17.5633	15.3004	17.4278	14.4272	24.3896	14.5046	18.7764	15.5657	20.1599	12.8541	15.7506	16.4677	20.4635
Smp_020450	Chr_1	15615518	16648	Chr_1	Sjp_0038650	SJC_S000283	197002	11.109	Aut_Shared	Aut_Shared	9.05909	8.41849	7.74727	9.34359	7.76889	8.52131	7.1017	4.20582	5.50407	9.32503	9.28878	9.10897	7.21029	6.50509	4.71971	5.4982	7.94138	4.53491	4.19506	8.89657	6.33521	8.57179	46.2733	46.043	42.5084	37.7423	40.8247	42.3418	35.2954	43.5085	35.7218	42.5974	30.064	44.2302	10.7857	24.6107	24.0048	44.6946	18.173
Smp_020590	SC_0080	520157	6982	Chr_UP	Sjp_0071230	SJC_S001001	106674	3.496	n.a.	n.a.	42.6237	41.5554	35.2226	36.5113	35.9869	32.8591	35.5136	37.3512	36.5622	34.4639	36.7807	35.4062	15.885	21.2436	15.2265	14.1564	11.0697	16.8511	15.5154	15.0574	15.9517	12.0585	85.0216	71.3725	82.3004	66.8897	70.1258	66.3198	71.6522	61.6536	137.443	67.7965	82.7588	69.355	20.7399	48.4606	39.4943	31.9723	35.0257
Smp_020660	SC_0080	839291	293	Chr_UP	Sjp_0001190	SJC_S000002	684424	10.399	n.a.	n.a.	0	0	0	0.0269771	0.0389639	0.0559331	0	0	0.0279994	0.0251876	0	0	0	0	0	0	0	0	0	0	0	0	0	0.265528	0	0	0	1.11046	0	0.701414	0	0.241245	0.630117	0	0	0	0	0	0
Smp_020760	SC_0080	1171325	10544	Chr_UP	Sjp_0001330	SJC_S000002	1116703	8.939	n.a.	n.a.	17.3464	17.4273	17.3452	17.3549	17.7459	20.6755	14.1082	6.28426	9.51116	19.925	20.9641	20.5371	14.3545	15.2503	9.2802	8.15148	18.5225	6.68983	7.74227	26.5352	7.00189	19.9516	74.9013	75.1745	75.9862	70.9407	76.9142	91.8249	68.6497	88.4745	56.4935	92.1111	50.8862	96.1953	29.2884	8.53714	9.92321	34.1083	49.1981
Smp_020770	SC_0080	1155553	626	Chr_UP	Sjp_0110220	SJC_S006815	732	0.404	n.a.	n.a.	174.265	197.874	206.804	252.065	274.804	195.802	498.889	972.995	634.221	254.146	281.556	340.645	482.753	481.414	746.181	602.837	209.821	219.637	229.079	158.854	505.44	104.17	93.9162	156.162	99.4434	154.164	141.331	119.097	263.176	141.892	1076.75	182.359	439.665	234.496	52.0468	57.8886	64.8183	28.6202	89.797
Smp_020800	SC_0080	1053161	14166	Chr_UP	Sjp_0001280	SJC_S000002	995597	5.33	n.a.	n.a.	8.91393	11.7776	9.81251	11.7109	11.7071	9.71232	15.3851	7.92988	13.5203	12.7277	13.0655	12.91	8.61368	4.82968	8.03216	9.13689	7.67271	5.03771	4.73287	5.96385	7.41541	9.20658	73.0672	89.3205	91.3882	91.6016	87.4393	69.837	184.77	139.175	172.418	143.251	183.395	150.348	4.45859	46.4525	36.1128	49.8067	0
Smp_020960	Chr_ZW	10952788	632	Chr_Z	Sjp_0095250	SJC_S002743	7279	0.569	S0	S0	0	0	0.232701	0.493031	1.06815	1.7889	0.404823	0	0.255857	0.230163	0.939646	0.917889	0.342528	0	0	0.111153	0	0	0	0	0	0	0	0.475232	0	1.00085	0.469304	0.993731	0.201163	0.209227	0	0.86354	0	0.671475	0	0	0	0	0
Smp_021040	Chr_2	30010365	786	Chr_2	Sjp_0043970	SJC_S000363	360392	0.39	Aut_Shared	Aut_Shared	355.504	365.28	429.134	384.117	393.238	407.526	514.14	596.929	492.368	412.701	443.15	474.404	215.33	206.301	144.459	112.925	188.636	122.344	143.746	139.383	162.631	128.709	276.396	296.772	275.683	282.906	346.06	294.252	445.007	330.26	973.383	365.146	465.825	386.312	32.7917	85.7246	64.6468	83.1128	0
Smp_021080	Chr_2	29961820	3420	Chr_2	Sjp_0043960	SJC_S000363	342981	2.921	Aut_Shared	Aut_Shared	23.5109	25.0871	23.7525	23.0017	23.9283	20.6594	23.894	25.195	21.0325	19.7274	18.7158	18.7742	39.4661	30.5317	33.2401	41.2454	21.5089	18.6108	17.7889	18.0497	23.3141	19.9815	53.9789	50.7838	55.5845	51.1905	59.4088	45.0632	54.568	40.3595	105.989	40.4608	53.922	44.5246	9.16994	14.625	14.0902	14.9937	7.76982
Smp_021100	Chr_2	29899975	20004	Chr_2	Sjp_0043900	SJC_S000363	156709	38.661	Aut_Shared	Aut_Shared	3.72027	4.08911	3.23303	3.35966	3.85682	2.87356	1.47164	0.251483	1.29537	1.83601	1.79436	1.15166	5.19623	3.11291	2.3639	3.54158	3.65578	2.64463	2.56027	3.48611	3.03689	3.57245	16.7142	15.7811	18.3549	16.7788	15.4448	13.1959	7.39738	8.70424	2.61239	8.2916	7.24697	5.88623	4.08935	6.3571	6.80582	4.80542	4.57496
Smp_021130	Chr_2	29812140	8149	Chr_2	Sjp_0043920	SJC_S000363	270511	6.966	Aut_Shared	Aut_Shared	8.95959	10.2253	10.6823	9.70556	12.593	10.4373	12.2017	10.5067	10.9511	9.64456	10.4959	11.8461	8.19086	4.90278	6.08338	8.84035	8.93895	9.83941	9.71301	9.77276	17.343	8.68735	31.7056	32.08	35.3008	40.0898	37.9648	34.1698	45.0701	32.7153	72.6433	37.1946	46.3299	43.7474	7.53107	33.6045	26.2519	25.622	44.5568
Smp_021140	Chr_2	29800448	807	Chr_2	Sjp_0043930	SJC_S000363	299656	0.731	Aut_Shared	Aut_Shared	744.487	636.874	606.246	825.103	715.311	512.025	1969.74	3488.4	2130.37	589.96	611.822	637.666	1493.39	1922.23	1312.85	899.653	391.62	777.445	723.107	308.845	871.978	377.185	1001.01	1098.45	872.938	962.291	862.37	690.123	2195.34	613.876	7266.67	632.024	2713.89	719.192	66.2629	762.612	719.269	280.701	325.686
Smp_021190	Chr_2	29602583	6095	Chr_2	Sjp_0043870	SJC_S000363	13100	6.345	Aut_Shared	Aut_Shared	2.21236	2.05947	2.44154	1.81275	1.43683	1.19171	2.50492	0.617186	3.37284	0.846254	0.969042	0.946605	0.805058	0.41419	0.380644	0.253564	0.729315	0.361657	0.254633	0.449365	0.692164	0.696165	4.49818	3.96348	4.89792	2.96189	5.17663	2.53981	7.19795	2.19529	2.65361	2.43939	10.7709	2.83019	0	3.67711	0	1.17789	0
Smp_021220	Chr_2	29506294	3848	Chr_2	Sjp_0103560	SJC_S004129	14948	0.476	Aut_Shared	Aut_Shared	221.858	223.387	247.289	268.158	231.96	263.941	219.214	289.93	256.911	264.127	269.014	298.72	30.1633	25.1581	27.9204	21.3503	28.3953	21.9828	29.3619	44.1843	23.5715	41.2636	148.914	167.749	135.362	152.265	155.636	175.385	218.256	238.733	491.039	228.18	258.488	264.351	35.8645	16.2099	18.7407	21.3774	14.1632
Smp_021260	Chr_1	46357032	13694	Chr_1	Sjp_0078810	SJC_S001361	18200	0.768	Aut_Shared	Aut_Shared	1.96839	1.66811	3.44809	3.83544	5.53965	8.70957	3.44916	1.40663	4.92858	11.5957	16.1859	30.7723	0.0237123	0.00801521	0.0174402	0.0487339	0.460733	0.040242	0.0226667	0.12308	0.0924217	0.163081	2.65274	3.17938	1.58179	6.49292	3.13972	7.85699	5.87263	27.9952	5.21643	33.0877	13.718	56.3576	0	0	1.89549	0	0
Smp_021290	Chr_1	46243435	10023	Chr_1	Sjp_0009990	SJC_S000035	94724	31.655	n.a.	n.a.	1.56913	2.03164	2.20016	1.4091	2.00961	1.88799	1.37166	0.400992	1.25094	1.72521	1.96348	1.63754	4.5608	3.68678	1.91644	2.60375	8.34061	5.58057	5.38852	8.97552	5.3876	10.3161	21.8485	20.2292	28.5317	27.8576	32.7417	26.691	19.6427	22.6496	11.0811	26.2476	20.3984	23.2558	3.53212	15.0068	15.7516	19.2202	0
Smp_021320	Chr_1	46073330	7874	Chr_1	Sjp_0038560	SJC_S000282	254111	2.137	Aut_Shared	Aut_Shared	39.3114	41.2449	40.4594	40.8266	41.3339	39.9424	45.1634	47.7713	36.2424	35.8509	41.5943	43.1363	2.71262	3.38267	1.99318	1.17765	1.6754	1.5397	1.41914	1.52514	2.41102	1.67336	60.4664	62.85	67.5845	71.5226	71.2126	67.7862	105.996	78.2057	214.921	87.9073	97.927	96.4375	0	3.93981	6.47039	5.04902	0
Smp_021340	Chr_3	15536249	2568	Chr_3	Sjp_0133120	SJC_S026748	635	1.18	Aut_Shared	Aut_Shared	687.595	583.448	450.857	495.453	392.824	383	296.714	231.507	300.172	260.261	238.784	229.05	254.075	310.56	140.684	115.399	235.861	134.764	129.211	294.612	157.874	244.803	609.007	436.164	520.886	343.128	428.507	346.121	268.546	215.961	374.236	197.118	292.937	200.492	28.0572	63.8578	63.5119	112.322	43.2874
Smp_021390	Chr_ZW	24419085	22963	Chr_Z	Sjp_0088280	SJC_S002074	18960	2.001	S0	S0	2.15852	1.9207	1.38958	2.38335	2.02492	2.68878	0.518015	0.0674843	0.654794	4.25417	4.00793	3.13211	0.172833	0.141803	0.0356588	0.0795395	1.49244	0.0719951	0.094621	1.77993	0.110231	1.43935	6.38332	8.34608	5.23362	5.12662	3.86342	6.54451	2.42883	8.26756	0.470713	7.10888	1.54733	8.59872	3.6451	3.87212	4.06487	13.8868	0
Smp_021550	Chr_ZW	624274	9055	Chr_UP	Sjp_0001750	SJC_S000003	1327154	6.54	n.a.	n.a.	9.27903	9.48099	7.85533	6.45573	8.64273	7.78199	4.98374	0.578136	4.74145	6.428	6.15184	4.2525	5.3472	3.87888	2.38506	3.78978	3.65806	1.94747	2.74233	3.69946	1.95679	3.18151	13.1252	10.3339	14.3597	12.7804	12.3418	12.2865	8.55908	10.4133	2.08723	9.62612	8.76457	7.1337	10.0338	1.98203	1.65782	4.21822	23.6747
Smp_021750	Chr_2	2964412	1783	Chr_2	Sjp_0050550	SJC_S000473	133603	1.732	Aut_Shared	Aut_Shared	95.7607	105.625	94.7947	111.355	105.858	87.4823	100.21	97.1449	79.936	72.8916	67.7584	58.6509	81.852	82.7152	57.5203	63.1371	48.8163	82.213	80.7765	54.4727	67.197	48.5974	57.2838	69.6824	66.7101	64.2234	58.1406	52.9493	74.7377	51.509	132.565	47.6107	64.8621	43.7982	0	0	0	0	0
Smp_021760	Chr_2	2975809	823	Chr_2	Sjp_0050560	SJC_S000473	139121	0.659	Aut_Shared	Aut_Shared	107.816	135.304	108.698	143.886	139.571	119.154	228.247	302.653	228.205	147.458	143.603	154.94	301.263	350.575	250.475	184.712	195.836	129.901	119.935	176.38	152.244	152.228	96.4892	123.056	114.598	118.327	101.608	106.494	214.045	129.979	527.227	120.023	229.751	139.535	27.0211	71.1829	119.453	91.4376	0
Smp_021790	Chr_2	3059580	4821	Chr_2	Sjp_0075300	SJC_S001195	23294	2.304	Aut_Shared	Aut_Shared	2.43705	2.00173	2.75848	1.58288	2.11034	2.77696	1.74958	0.703313	1.95879	2.89892	3.94496	4.08031	7.16204	9.2055	4.31694	3.4097	3.65843	0.342921	0.772613	2.05395	0.0875076	1.25072	8.65993	6.87451	7.37683	6.8131	11.5808	6.76466	5.81988	11.3942	5.83857	11.3894	11.5155	15.6174	9.97073	0	0.929485	0.810326	0
Smp_021800	Chr_2	3084474	1067	Chr_2	Sjp_0075310	SJC_S001195	30780	3.076	Aut_Shared	Aut_Shared	20.2902	22.8234	22.3404	20.2923	25.9498	20.8947	30.9647	28.2715	26.1727	23.4167	24.117	24.9169	69.5218	61.2065	42.8474	31.1082	28.7592	40.2847	38.9815	46.7965	35.9799	47.3017	66.3133	66.1684	71.1369	86.203	76.6091	71.1324	108.347	76.71	185.306	82.5433	96.9698	85.7744	5.43471	17.3499	24.3394	22.2445	9.23375
Smp_021830	Chr_2	3138230	18645	Chr_2	Sjp_0005350	SJC_S000016	915494	5.675	Aut_Shared	Aut_Shared	10.8836	15.3056	14.8856	13.9402	16.2074	14.9127	15.2616	15.4429	15.2637	12.6463	12.6716	12.7464	2.26018	2.59414	2.17206	1.83487	1.06131	1.47781	1.63148	1.37856	1.06345	1.59302	34.044	48.0947	50.1061	52.5875	51.9976	53.1218	60.8448	48.3711	108.353	47.6417	67.5001	49.4962	5.04131	10.7252	16.9183	16.4975	25.6652
Smp_021870	Chr_2	3298250	1355	Chr_2	Sjp_0103700	SJC_S004141	28423	1.294	Aut_Shared	Aut_Shared	191.26	198.998	185.308	177.99	192.103	178.113	179.878	216.955	114.644	133.493	129.326	114.526	126.665	92.8304	67.4806	88.9384	92.3851	143.564	139.049	191.714	113.953	156.573	121.034	118.515	127.397	121.598	124.936	117.346	124.434	82.6213	268.532	82.7501	85.3123	78.0162	140.871	100.731	101.3	165.111	122.86
Smp_021910	Chr_2	3419531	4749	Chr_2	Sjp_0105150	SJC_S004427	965	4.303	Aut_Shared	Aut_Shared	14.4542	14.1717	16.1547	15.0927	16.9965	16.3221	22.7239	18.2642	19.7245	17.7133	16.0596	16.3554	19.3124	18.1123	14.1961	13.1651	5.43497	9.97945	7.64719	8.20728	6.30724	7.99428	53.1886	54.6823	50.0079	54.8969	58.9871	59.8869	80.0058	58.5667	120.042	53.3519	74.2981	56.6731	5.51237	21.119	24.6915	13.539	0
Smp_022020	Chr_2	3754251	13001	Chr_2	Sjp_0081000	SJC_S001562	49530	9.15	Aut_Shared	Aut_Shared	19.0942	19.7417	17.6108	17.9358	21.4328	17.0521	12.5368	4.9587	8.70314	11.9942	11.9203	8.3479	9.68525	7.17889	4.70267	7.22425	6.54041	6.37926	7.75934	7.13026	7.4958	5.99489	42.3823	41.1571	45.6367	48.1273	42.4274	39.5754	30.256	25.9533	21.5695	26.1857	22.7985	19.5833	33.5677	15.0766	23.0608	20.3894	0
Smp_022070	Chr_2	3891737	6181	Chr_2	Sjp_0129590	SJC_S024493	971	1.971	Aut_Shared	Aut_Shared	33.9663	14.8195	14.9806	26.4736	15.7264	15.788	9.99209	9.11202	6.57375	13.3554	13.0884	13.9115	0.817206	0.361073	0.369828	0.744424	0.162393	0	0	0.0340856	0.0682534	0.0361305	74.8583	49.9436	31.7961	34.3548	32.108	32.5919	25.2555	32.1708	49.6057	39.8944	19.8858	38.52	0	0	0	0	0
Smp_022110	SC_0111	130196	3297	Chr_newZ	Sjp_0056660	SJC_S000590	173936	1.931	n.a.	S1_mans	35.7883	41.9296	37.7815	28.7654	31.7896	30.6487	47.715	47.2032	32.6449	26.7216	30.5954	28.9404	27.9707	24.5354	49.7852	60.3942	24.312	20.2244	15.534	25.8801	20.729	26.6876	32.9961	27.7213	40.3257	28.9092	34.5935	26.7466	49.4272	23.8599	87.5137	27.3727	36.1709	28.1275	10.2502	15.9079	12.9652	20.3257	10.48
Smp_022130	Chr_3.unplaced.SC_0174	61321	29788	Chr_UP	Sjp_0090630	SJC_S002310	39665	10.887	n.a.	n.a.	6.78409	7.131	7.72282	5.73335	7.31322	7.50634	5.98763	3.05124	4.57328	7.68672	7.41558	6.66821	1.32265	1.03295	0.791444	1.18386	1.50671	1.98874	1.59429	2.21377	1.86946	1.91175	45.2113	42.5356	52.9798	52.8644	57.1066	58.8481	53.5257	61.2159	45.9213	59.0776	44.0659	56.5295	34.2379	26.3849	25.0917	25.6465	28.9833
Smp_022140	Chr_3.unplaced.SC_0174	45205	10083	Chr_UP	Sjp_0090620	SJC_S002310	35030	3.544	n.a.	n.a.	14.8077	14.7487	12.5532	17.4938	16.292	13.5401	14.429	11.2403	11.2966	10.7534	9.50437	9.72642	5.79321	4.14381	4.26348	5.27753	3.6833	4.56359	4.37136	2.77902	4.39322	3.58804	30.9289	37.4966	31.335	31.4891	25.976	27.7437	31.2517	21.2882	43.043	18.8618	26.9895	20.4014	0	16.8535	13.5279	5.9988	7.45863
Smp_022150	Chr_3.unplaced.SC_0174	14349	29171	Chr_UP	Sjp_0001910	SJC_S000004	320144	1.692	n.a.	n.a.	5.10544	6.81441	5.63433	8.87034	6.10652	4.98457	8.30437	3.99043	14.369	8.12713	8.21579	12.5014	2.82245	3.35503	1.15204	1.00059	2.23659	1.32238	1.12791	2.31837	1.35944	1.63831	4.1823	7.12535	4.53425	4.65305	4.33643	3.63823	7.78579	6.93064	7.17749	7.00064	14.8445	11.2384	6.32471	10.0732	8.80687	7.73925	0
Smp_022170	SC_0254	99496	10630	Chr_UP	Sjp_0088790	SJC_S002155	1738	7.141	n.a.	n.a.	36.1395	34.4811	32.8746	44.1172	43.7755	43.2917	44.6108	28.2515	37.4507	66.3343	55.7607	65.4586	13.0301	11.0655	6.97766	5.94437	11.3581	9.84987	8.20524	10.6233	10.279	11.2397	286.707	351.804	264.345	338.017	266.336	348.838	340.341	450.042	381.961	381.446	308.558	462.338	4.65737	36.6473	45.5477	26.6561	31.577
Smp_022300	Chr_ZW	6362580	7259	Chr_Z	Sjp_0011080	SJC_S000042	208250	9.417	S1_mans	S1_mans	0.412794	0.462544	0.632718	0.655386	0.387244	0.75663	0.403597	0.458867	0.35557	0.500655	0.496789	0.457556	0.0497033	0.0302411	0.0282006	0.0677422	0.0197538	0.075916	0.128281	0.290237	0.0581174	0.153825	3.33643	5.81644	3.64735	3.31758	5.2054	8.36168	4.00086	5.44162	10.1694	5.61479	4.09771	5.13644	0	0	7.54065	0	0
Smp_022320	Chr_ZW	6306232	13748	Chr_Z	Sjp_0011050	SJC_S000042	155600	10.561	S1_mans	S1_mans	6.48228	7.27834	8.28718	7.50413	7.19367	7.69674	10.8291	14.2311	9.2359	6.43592	7.02432	6.84932	6.97816	6.84737	7.91405	6.62733	2.64924	5.15079	4.78646	4.26025	2.6697	5.53921	56.7779	73.2762	67.1278	67.1644	83.1059	70.5901	100.773	56.069	248.902	62.6502	97.006	67.0642	6.48136	36.3036	39.9994	15.8935	14.8029
Smp_022340	Chr_ZW	6274290	1763	Chr_Z	Sjp_0106490	SJC_S004800	13654	1.613	S1_mans	S1_mans	57.3038	128.826	162.615	78.9602	120.702	142.527	39.0571	11.9716	15.885	146.714	162.668	139.717	74.6969	31.9382	102.548	102.644	353.073	25.0062	18.1344	232.432	30.151	217.496	54.8321	71.8087	113.742	107.87	151.742	131.233	44.1857	150.209	24.2339	168.78	19.8115	153.65	123.915	14.4719	14.6643	113.711	47.0343
Smp_022400	Chr_ZW	5865868	17442	Chr_Z	Sjp_0101640	SJC_S003944	16154	2.178	S1_mans	S1_mans	98.2629	103.171	110.886	100.467	97.2967	118.105	61.552	25.172	58.8881	94.8249	84.507	85.1281	16.1802	10.9223	19.0346	23.8492	53.873	25.7181	34.5776	63.3305	18.1404	74.5305	356.577	406.462	380.991	350.547	433.526	439.192	365.143	525.65	270.152	492.924	407.867	522.756	285.585	118.024	174.856	273.569	80.1513
Smp_022450	Chr_ZW	5760489	10684	Chr_Z	Sjp_0104900	SJC_S004334	4482	4.496	n.a.	n.a.	11.7683	12.7085	11.6622	12.1361	7.52514	8.99122	8.40223	10.2418	9.32558	22.3418	20.8108	21.8681	1.39469	1.44854	3.04648	2.67608	3.61032	0.980009	1.77221	3.7467	1.73741	3.17718	105.004	132.956	106.771	83.1905	127.016	97.4569	94.8185	260.865	216.482	233.715	130.321	260.007	66.5899	32.274	28.7004	37.0047	0
Smp_022460	Chr_ZW	5731529	2465	Chr_Z	Sjp_0015250	SJC_S000070	104724	8.89	S1_mans	S1_mans	10.3972	13.3155	14.462	11.9756	10.4601	11.0081	17.0361	21.8579	12.6586	15.6007	15.6669	16.3763	19.5694	23.4215	27.4051	17.5123	19.5456	5.47721	8.43677	15.8119	7.01697	14.1332	114.014	126.042	145.004	119.947	162.129	115.47	179.241	184.464	369.15	188.309	182.167	180.773	29.5692	32.3838	96.8209	41.8756	108.067
Smp_022470	Chr_ZW	5711399	15414	Chr_Z	Sjp_0015260	SJC_S000070	115762	15.22	S1_mans	S1_mans	7.78989	7.65972	7.3685	5.67705	6.3094	6.76424	8.18009	5.38547	7.04957	5.04233	4.82141	4.74409	0.765411	1.49774	1.27716	0.902377	1.30239	0.572025	0.926319	1.01145	0.520021	1.82552	79.3977	56.844	76.0948	61.5168	74.2932	67.0117	90.8208	49.59	105.815	48.0178	87.6441	50.4766	8.86376	7.57195	10.0012	19.4515	0
Smp_022500	Chr_ZW	5640524	6208	Chr_UP	Sjp_0093860	SJC_S002584	31728	0.629	n.a.	n.a.	90.9848	96.1341	112.198	101.688	110.798	82.7623	127.989	155.86	113.18	85.3654	95.839	94.4503	19.1383	16.2012	29.4576	31.5033	21.204	6.7464	6.84994	18.7334	9.92165	18.9939	96.6176	104.514	90.3548	117.391	123.404	90.2682	147.339	80.424	328.044	97.846	144.498	98.0203	30.285	28.0615	19.987	36.0678	17.4001
Smp_022540	Chr_ZW	5658010	6645	Chr_Z	Sjp_0093840	SJC_S002584	14081	0.495	S1_mans	S1_mans	174.95	195.143	174.67	176.539	182.948	182.132	239.418	265.434	207.639	302.405	313.774	332.623	10.0556	8.38549	13.4008	16.7931	17.5869	6.17834	7.33369	20.8622	8.06291	17.4423	116.603	125.492	130.544	130.324	137.241	137.711	210.285	239.719	437.996	261.481	217.813	316.037	59.588	42.657	53.0677	96.0777	9.20333
Smp_022560	Chr_2	5303753	1750	Chr_newZ	Sjp_0069130	SJC_S000939	25088	0.552	n.a.	S1_mans	911.18	864.285	745.988	946.805	894.418	601.668	1847.13	2992.57	2004.66	565.845	584.298	635.345	260.289	253.577	776.37	610.963	146.916	244.52	243.529	138.569	208.526	186.315	743.086	781.293	711.21	732.168	641.27	491.349	1751.73	497.171	5214.48	517.505	2135.08	598.817	183.395	20.9381	21.0218	21.5243	375.136
Smp_022570	Chr_2	5318197	1654	Chr_newZ	Sjp_0069120	SJC_S000939	2492	13.912	n.a.	S1_mans	4.19129	3.95973	3.82602	3.19615	3.52412	3.79417	4.36283	3.82434	2.72078	3.35127	3.55491	3.37875	32.0005	37.8255	34.4274	32.5123	33.2907	13.3271	6.75593	28.9148	10.2025	28.4892	47.1129	36.8227	44.6986	39.7836	45.0149	44.0806	53.424	37.7268	86.221	41.4147	36.7072	39.3275	6.56624	13.9903	11.0556	12.5638	0
Smp_022610	Chr_2	5419349	2994	Chr_newZ	Sjp_0073180	SJC_S001074	31561	4.686	n.a.	S1_mans	2.30431	2.18713	1.83663	0.119733	0.0864673	0.0930934	0.122889	0.0576338	0.0932027	0	0	0.0278638	0.723039	0.378821	0.0227909	0.199437	0	0.0920298	0	0.0703684	0	0	6.26431	0.323308	5.70126	0.15131	5.74696	0.338026	0.364946	0	0.5835	0	0.383616	0.101515	0	0	0	0	0
Smp_022630	Chr_2	5467986	44145	Chr_newZ	Sjp_0085290	SJC_S001801	26546	24.544	n.a.	S1_mans	2.27892	2.10874	2.19024	2.30883	1.96452	2.13284	2.38378	0.682223	2.01671	2.51318	2.52691	2.10133	1.20878	0.770771	0.868697	1.43696	3.99856	1.3045	1.32189	3.65098	1.22324	3.80931	30.7637	33.1002	28.7388	27.0603	32.7701	31.453	35.6131	33.499	20.1145	34.2605	34.0047	30.3898	18.1561	11.9817	15.1304	30.6659	0
Smp_022640	Chr_1	2627149	1804	Chr_1	Sjp_0093550	SJC_S002562	7033	1.526	Aut_Shared	Aut_Shared	456.262	415.731	377.438	495.9	455.901	332.18	939.867	1961.21	1091.68	313.247	324.351	360.136	514.315	423.871	859.891	737.241	206.584	368.401	339.992	135.589	595.862	163.654	761.111	831.967	707.044	754.231	673.218	560.766	1813.22	560.902	6826.43	571.435	2344.69	684.473	493.554	412.07	377.719	123.858	1349.48
Smp_022740	Chr_2	5645882	707	Chr_newZ	Sjp_0015400	SJC_S000070	567216	0.626	n.a.	S1_mans	12.7644	17.1906	10.9987	15.9089	11.9743	8.59464	1.47185	1.50999	1.86048	5.23015	6.19213	4.58871	5.51146	7.76239	6.94907	5.1668	0.811274	0	0.439035	0.297996	0.59671	0.94762	8.50674	10.7105	11.6478	7.22963	7.52585	3.6609	0.871862	4.17134	1.85866	3.36841	0.488782	3.4923	0	0	0	0	0
Smp_022760	Chr_ZW	9449953	5197	Chr_Z	Sjp_0121880	SJC_S014357	5337	3.757	S1_mans	S1_mans	1.20712	2.52335	1.83262	0.746699	0.91671	1.27724	1.04228	0.107828	0.736244	1.95207	1.49425	1.4249	0.263811	0.281599	0.229773	0.317653	1.62789	0	0.238905	1.74319	0.162353	1.54697	6.98034	3.31879	9.08131	3.49472	7.37414	4.12048	4.91689	6.94042	1.49742	4.89983	3.44563	4.68926	13.3421	0	9.36227	12.7665	0
Smp_022870	Chr_ZW	9118194	4330	Chr_UP	Sjp_0108150	SJC_S005548	7772	1.303	n.a.	n.a.	3.14907	1.76976	0.914552	0.645898	1.24386	0.669587	2.12136	0.725443	1.22902	2.71374	2.35939	3.80787	0.158317	0.168992	0.189107	0.137902	0.76167	0	0.143371	0.389253	0.0974305	0.670483	2.38831	0.480411	1.09547	0.505877	0.948837	0.627851	2.23691	2.85535	1.73407	2.50974	1.56757	3.84649	0	0	0.934076	0	0
Smp_022890	Chr_ZW	9067740	16898	Chr_Z	Sjp_0004750	SJC_S000014	310166	1.095	S1_mans	S1_mans	13.0168	13.8056	15.7195	9.09497	11.841	11.9517	3.36576	0.493282	1.86133	7.77406	7.81236	9.77783	1.08892	0.885547	0.910594	0.8065	7.26383	0.782683	0.624542	6.69528	1.27326	5.61676	13.4848	9.81353	14.5644	11.9101	15.9329	11.3037	3.80197	8.34815	0.300191	7.55598	2.17093	10.0274	7.75563	2.74338	0.719033	24.5826	0
Smp_023010	Chr_7	7208350	2300	Chr_7	Sjp_0050240	SJC_S000467	142039	3.592	Aut_Shared	Aut_Shared	0.961961	1.64062	1.9168	0.820049	1.63563	2.06459	1.53905	3.19545	1.54013	1.49484	1.07914	2.18101	9.67876	11.2305	7.55046	5.00903	14.0899	8.14632	7.5575	30.8696	4.58559	24.9539	17.0895	9.93077	33.9673	33.1144	33.0983	40.2336	36.7818	28.419	118.739	24.8121	42.7141	32.7404	492.048	32.514	30.7095	167.988	89.1029
Smp_023160	Chr_2	17047103	415	Chr_2	Sjp_0028960	SJC_S000182	168144	0.368	Aut_Shared	Aut_Shared	251.758	301.478	301.873	283.584	283.52	254.866	343.951	558.491	287.605	253.741	274.23	295.556	426.348	439.834	538.325	371.979	217.335	444.843	534.033	545.745	236.859	708.713	173.715	196.535	197.708	186.385	217.127	167.53	321.793	227.39	960.222	245.463	303.338	275.983	258.675	474.681	415.876	525.075	163.364
Smp_023170	Chr_2	17043396	3566	Chr_2	Sjp_0028970	SJC_S000182	176283	0.884	Aut_Shared	Aut_Shared	117.508	148.11	125.966	111.548	133.152	102.315	145.528	98.6802	151.511	115.556	109.774	103.835	27.338	35.5197	29.6021	27.2346	6.91631	8.11313	11.6638	6.20351	17.2725	7.07668	68.2101	68.3654	86.9713	77.763	78.4264	64.088	97.8041	70.4945	122.921	67.9509	110.698	63.9134	9.33207	24.8079	27.38	7.63032	7.90914
Smp_023230	Chr_2	16951762	13922	Chr_2	Sjp_0085360	SJC_S001803	7806	9.216	Aut_Shared	Aut_Shared	5.74113	6.22762	5.56005	6.68158	5.64956	5.41193	10.5974	13.5241	8.6882	6.22415	6.61361	7.63641	6.015	4.58057	4.81063	5.3234	4.16109	5.71974	5.32862	4.19187	5.15146	3.72151	46.4636	57.3753	51.4706	46.0588	47.7274	49.2601	80.6887	42.1994	180.786	46.7313	73.0434	55.0626	23.0938	26.5199	30.9712	17.6224	31.3115
Smp_023240	Chr_2	16941470	8977	Chr_2	Sjp_0085370	SJC_S001803	27956	0.323	Aut_Shared	Aut_Shared	19.3896	19.8314	18.4468	8.25103	16.935	5.85249	4.99198	0.418068	1.35216	4.8655	5.37969	4.44665	4.00706	2.68583	3.70559	3.45883	0.255574	0.0920811	0.138308	0.563261	0.18798	0.17414	20.4968	5.64195	21.8708	9.9017	16.7147	6.63613	4.77641	5.58887	0	3.20373	2.51039	4.65019	0	0	0	2.71342	0
Smp_023250	Chr_2	16925881	8629	Chr_2	Sjp_0085380	SJC_S001803	33436	7.673	Aut_Shared	Aut_Shared	9.09099	8.44834	6.74718	7.76928	8.18504	7.37199	6.48434	2.25265	6.64068	6.82721	6.68933	6.27919	8.22862	8.31459	8.18057	10.0623	14.3409	10.7929	11.4389	12.0858	12.2226	15.3989	58.7736	47.4087	55.1123	49.5955	47.1234	47.6231	51.8091	50.7484	30.7577	49.8296	59.7448	50.7866	0	0	0	0	0
Smp_023270	Chr_2	16858493	10000	Chr_2	Sjp_0085400	SJC_S001803	80874	2.491	Aut_Shared	Aut_Shared	21.3273	20.7775	19.2949	18.9201	22.2844	19.5556	16.6447	7.26408	18.2928	16.561	14.9709	14.3622	7.9267	11.9529	5.32241	6.39614	9.83674	6.97109	7.48058	9.96531	8.35311	9.7592	29.516	25.0657	26.9175	27.2244	26.3409	26.2067	25.9448	22.654	19.4609	21.1405	29.2923	21.8289	0	1.22684	3.87804	4.002	7.74063
Smp_023360	Chr_3	22661962	14351	Chr_3	Sjp_0007710	SJC_S000024	803627	7.261	Aut_Shared	Aut_Shared	32.687	27.8771	25.7118	33.8836	31.3055	26.7553	43.4136	33.494	38.5159	29.1289	28.5885	28.4121	30.5109	29.0838	41.5616	37.6428	14.7479	26.035	24.6787	15.3414	19.1373	20.5411	99.8721	108.047	88.1227	96.3078	85.2938	82.5648	145.514	90.9483	206.569	90.1801	144.04	94.057	25.8478	102.691	123.672	50.9559	43.1977
Smp_023470	Chr_3	21192064	1660	Chr_3	Sjp_0007600	SJC_S000024	505444	1.457	Aut_Shared	Aut_Shared	25.3461	32.0058	35.4418	16.655	12.6534	9.88043	9.24854	9.54613	15.7873	5.30324	8.07308	6.63155	1.41276	1.10201	2.34304	0.973325	0.259143	0.829931	0.373973	2.66527	0	0.134532	16.1731	10.9232	20.5649	8.25797	23.095	6.44228	6.99484	3.57597	12.7635	5.28018	12.7945	4.81481	33.0841	2.10798	0	4.49916	27.9238
Smp_023530	Chr_3	21362100	2984	Chr_3	Sjp_0007550	SJC_S000024	302766	2.626	Aut_Shared	Aut_Shared	145.81	125.672	119.852	179.848	152.832	114.236	286.439	270.998	324.096	104.98	101.394	111.725	95.7852	88.3526	102.663	119.698	84.5748	106.743	88.4175	72.2281	130.351	70.7986	220.66	280.895	194.878	224.701	193.422	175.958	498.063	187.425	862.762	181.375	625.409	210.24	68.3592	161.671	141.941	91.9362	79.5664
Smp_023620	Chr_3	21578051	30899	Chr_3	Sjp_0045730	SJC_S000391	269001	38.202	Aut_Shared	Aut_Shared	3.10921	3.39376	2.6168	2.43436	2.84252	2.48177	1.02504	0.311062	0.979392	2.02262	1.94188	1.53805	2.98922	3.08096	1.40562	1.74832	1.51287	0.543958	0.602733	1.31596	0.723626	1.16363	43.1611	32.3704	50.4884	37.495	39.4255	35.1414	15.8489	27.0778	8.66585	27.1063	15.8115	22.5639	2.64243	2.80426	5.88032	7.89763	0
Smp_023660	Chr_3	21667604	4513	Chr_3	Sjp_0045690	SJC_S000391	222412	3.015	Aut_Shared	Aut_Shared	19.6262	20.9057	17.7421	22.8894	21.6368	20.1599	24.4096	17.5121	22.6945	19.1558	20.4376	20.3542	25.2629	23.8021	18.8998	19.4729	20.5891	22.7121	17.0571	22.5015	26.0809	21.3277	70.6227	77.2164	71.3103	70.2424	63.5444	70.9765	89.3397	59.0673	117.584	65.1855	87.8024	70.0074	19.1817	33.6589	25.4668	23.5305	0
Smp_023670	Chr_3	21672299	2418	Chr_3	Sjp_0045700	SJC_S000391	225736	2.593	Aut_Shared	Aut_Shared	21.9875	24.308	23.5401	26.8309	26.1738	18.6181	33.6233	27.2884	28.0161	21.0106	19.5883	19.3362	46.5544	42.7451	27.2182	27.3238	33.4464	28.3742	19.7689	34.7653	24.6006	35.8351	32.5647	42.4811	37.953	40.0796	39.5621	30.5542	52.5123	29.4815	77.3675	30.068	49.0274	31.0827	5.41709	41.5041	31.8406	36.953	0
Smp_023700	Chr_3	21707565	753	Chr_3	Sjp_0011510	SJC_S000045	571088	0.694	Aut_Shared	Aut_Shared	157.458	177.583	166.367	178.265	171.066	172.231	249.263	335.644	201.592	179.272	192.985	193.785	116.336	112.044	183.141	188.403	82.0747	88.5525	104.29	129.264	112.052	119.521	200.134	230.17	225.234	205.81	219.772	227.632	270.35	177.392	680.879	196.425	238.438	205.324	0	3.95086	8.44398	3.95043	0
Smp_023840	Chr_2	24886481	2355	Chr_2	Sjp_0099230	SJC_S003621	3077	7.683	n.a.	n.a.	21.3065	22.2773	25.6266	26.9836	26.9755	25.3615	65.1187	121.749	60.5221	41.9157	41.2493	47.551	26.535	30.1705	29.1778	17.3906	18.571	63.7655	87.6494	29.2541	67.1774	19.1555	716.005	835.526	690.223	878.447	823.563	856.433	1668.97	1034.52	5882.52	999.395	1788.37	1209.58	76.9557	385.51	588.171	115.377	92.6707
Smp_023940	Chr_2	24434585	47381	Chr_2	Sjp_0051210	SJC_S000484	110335	33.997	Aut_Shared	Aut_Shared	2.20426	2.06503	1.77597	2.02581	2.09762	2.0445	0.63689	0.083412	0.680873	1.7489	1.77711	1.3711	0.828489	0.798436	0.402523	0.391415	2.65111	1.00606	0.727172	1.53851	1.76297	1.36687	9.30922	9.24367	9.05404	9.46519	8.71496	9.28328	3.12666	8.36771	0.729584	8.33585	3.84849	6.93407	3.48818	3.20361	3.22374	3.1521	1.95002
Smp_024000	Chr_ZW	39015250	40004	Chr_PSA	Sjp_0062010	SJC_S000718	377902	7.788	PSA_shared	PSA_shared	2.6898	2.43457	3.12826	3.368	3.06959	3.04342	4.55483	3.20771	5.53319	2.55603	2.57443	2.22981	2.08339	2.12365	1.2793	1.62697	1.41586	1.63928	1.68374	1.6221	2.05643	1.54635	13.0056	17.6758	11.4285	15.8641	15.4668	15.2055	26.8029	13.3969	32.9105	13.6199	36.9018	12.224	19.2888	12.6826	16.0711	7.3293	22.6971
Smp_024010	Chr_ZW	39062031	708	Chr_PSA	Sjp_0061990	SJC_S000718	359227	0.485	n.a.	n.a.	80.5955	57.5839	44.4996	64.2049	54.721	35.9782	15.6729	16.7055	9.60545	16.2016	11.5751	13.1916	44.3352	38.9122	35.2745	36.2654	0.202532	1.55671	0	0.297575	0	0	65.3385	57.2556	43.105	38.9178	37.2455	32.3065	18.4655	16.0048	33.6245	14.037	10.2443	14.9813	0	0	0	0	0
Smp_024030	Chr_ZW	39145090	4034	Chr_PSA	Sjp_0023780	SJC_S000137	28226	15.153	n.a.	n.a.	5.92882	6.23942	5.58358	5.24857	5.28108	5.17238	5.59405	4.83895	4.38103	5.09056	4.79862	5.26484	10.84	12.77	12.6949	10.1786	10.1306	11.1335	9.77206	12.2733	12.445	9.74337	64.4825	55.0232	64.7577	55.4479	64.1233	53.9712	68.9964	57.4359	110.784	59.2637	63.0053	62.2793	771.676	42.8809	52.6483	124.226	230.193
Smp_024060	Chr_ZW	39185751	1976	Chr_PSA	Sjp_0089880	SJC_S002252	48966	2.209	PSA_shared	PSA_shared	33.924	36.0729	39.4403	36.6384	35.9513	34.8883	47.9145	71.7054	42.4424	47.3103	47.9232	47.7002	90.9112	102.761	83.0849	72.6839	34.9048	19.3824	20.2638	37.9571	27.9684	30.8538	123.851	126.747	135.968	139.707	152.441	132.913	167.84	149.583	460.232	148.843	155.328	155.743	34.8312	17.4113	46.1464	41.5891	80.4132
Smp_024110	Chr_ZW	39428503	6173	Chr_PSA	Sjp_0054230	SJC_S000544	47281	7.64	PSA_shared	PSA_shared	418.72	524.148	542.331	510.287	526.768	588.367	525.932	628.554	476.44	679.876	651.108	728.371	304.763	252.403	454.566	479.587	327.459	239.918	287.066	421.366	230.995	431.74	1634.81	1942.47	2054.97	1925.97	2249.38	2267.09	2244.45	2686.78	4882.17	2577.06	2229.34	3058.86	393.487	763.919	892.213	1149.62	307.515
Smp_024120	Chr_ZW	39434794	392	Chr_PSA	Sjp_0054240	SJC_S000544	55028	0.395	PSA_shared	PSA_shared	1486.03	1966.75	2046.44	1552.53	1523.81	1649.97	1770.73	2775.59	1504.85	1520.17	1609.39	1582.04	1303.28	1667.22	1980.67	1296.37	559.671	745.075	841.716	1059.33	455.237	1108.64	1067.83	1128.57	1415.5	1120.22	1578.94	1209.42	1571.8	1258.13	4529.94	1320.52	1429.88	1382.16	322.756	781.466	1093.2	1064.98	215.081
Smp_024240	Chr_ZW	39910809	6985	Chr_PSA	Sjp_0006070	SJC_S000019	179942	3.748	n.a.	n.a.	7.49062	9.77581	9.96231	8.49539	9.51344	9.46652	7.06765	3.45877	7.34128	7.51255	6.66896	6.79325	9.01345	15.059	4.57186	4.04797	3.34617	3.78691	4.53265	4.25287	2.59708	5.21139	16.5344	23.9005	23.0049	20.5723	25.1442	21.2214	20.9456	20.7277	18.858	18.9867	24.226	19.685	12.3451	3.51519	3.42485	6.339	1.90146
Smp_024290	Chr_ZW	40139333	5984	Chr_PSA	Sjp_0088840	SJC_S002160	3077	9.87	n.a.	n.a.	0.700175	0.337476	0.429283	0.483191	0.431049	0.265189	0.0816823	0.0820888	0.0590001	0.172494	0.121883	0.145518	1.16366	0.813175	0.14824	0.170221	1.10228	0.230228	0.259356	0.387285	0.987005	0.485159	6.62198	7.87102	2.15377	2.2102	6.21827	2.4688	2.33223	3.11879	4.97191	1.7878	1.40088	3.7071	0	0	0	0.940363	0
Smp_024370	Chr_ZW	40445199	13336	Chr_PSA	Sjp_0080410	SJC_S001514	3932	18.808	PSA_shared	PSA_shared	3.26099	4.61821	4.30843	2.92348	4.70721	4.53833	3.4292	1.60826	1.9506	4.31019	4.56256	3.88766	18.4835	12.6418	11.4358	15.2629	21.7089	6.44628	5.74896	21.3116	8.73105	22.4729	15.2349	16.2879	23.7034	25.7342	21.8422	24.9712	20.1364	22.5801	17.4088	23.4336	13.4357	21.39	13.8776	24.7454	20.0796	82.9711	4.67764
Smp_024380	Chr_ZW	40488998	6976	Chr_PSA	Sjp_0073590	SJC_S001106	18240	18.763	PSA_shared	PSA_shared	4.75359	5.50325	5.32789	4.14904	4.23261	3.38672	9.42222	9.04654	9.0703	2.27543	2.34374	1.99024	16.2245	14.3389	19.1718	20.8299	5.09768	9.3215	9.56644	4.37916	12.1555	5.28214	47.9932	43.042	56.8458	41.9336	60.4003	35.0874	119.26	26.586	214.326	29.2903	131.29	25.7821	31.4467	32.5792	14.2555	9.63125	33.2401
Smp_024390	Chr_ZW	40498046	683	Chr_PSA	Sjp_0073580	SJC_S001106	11645	0.635	PSA_shared	PSA_shared	208.818	214.258	217.481	240.553	221.736	206.325	639.704	1224.68	693.065	199.641	208.601	221.455	232.959	272.82	341.38	303.314	88.8069	251.332	295.855	74.3406	199.51	88.2827	170.468	202.686	175.119	181.153	191.241	169.431	590.815	167.172	2008.28	178.969	691.314	193.832	0	19.785	34.4974	7.8534	0
Smp_024450	Chr_ZW	40648556	20742	Chr_PSA	Sjp_0061730	SJC_S000713	46397	21.835	PSA_shared	PSA_shared	4.24305	3.80196	3.01986	2.76231	2.73712	3.53624	1.80393	0.173163	1.48016	7.28738	8.94362	6.8529	0.763618	0.31221	0.291143	0.57914	2.85513	0.943166	1.18221	2.99641	0.915261	2.96084	18.5762	12.9956	16.3449	12.3719	13.967	16.8001	11.9736	40.5883	2.5392	49.785	10.192	41.3626	7.35435	4.68758	3.0757	18.0125	0
Smp_024490	Chr_1	18681303	7707	Chr_1	Sjp_0068400	SJC_S000908	145679	2.482	Aut_Shared	Aut_Shared	28.7135	33.0342	26.6201	22.1534	24.7323	25.5438	28.6306	28.8353	26.9815	25.3272	25.6343	26.3033	6.55398	7.51483	3.67874	4.50733	8.16782	13.0136	17.3584	13.0122	12.9732	12.1702	66.6416	52.3615	76.4897	63.1779	63.4235	57.739	79.653	60.6938	142.49	61.3244	81.7865	73.5984	9.99222	61.6457	92.2068	64.0313	33.9087
Smp_024500	Chr_1	18652484	12325	Chr_1	Sjp_0085620	SJC_S001815	45124	3.864	Aut_Shared	Aut_Shared	24.3123	23.9379	24.2951	20.5464	21.5491	20.171	25.6633	20.5839	19.1774	23.3524	21.5164	21.6603	7.57892	7.98823	8.37656	9.10525	11.2038	10.6861	11.4589	13.3333	9.44724	12.2125	68.5072	58.1891	65.5982	61.5031	74.0351	60.0406	66.5132	56.4183	99.9053	53.0656	55.8553	57.686	42.0176	17.5932	20.4601	30.8977	39.7159
Smp_024580	Chr_4	10739471	17372	Chr_4	Sjp_0060890	SJC_S000692	31032	5.936	Aut_Shared	Aut_Shared	8.22221	9.10762	7.62856	8.1996	7.64502	7.10402	9.60414	8.71274	9.78563	5.93481	6.89039	6.75285	8.67099	9.24146	8.19759	10.2429	7.27199	6.93125	7.86178	6.4277	8.30537	5.33496	50.1899	55.5419	54.0857	45.7898	51.5308	51.664	79.9861	43.3367	130.563	50.8216	92.873	55.8559	7.66105	4.81057	3.38265	5.33799	11.2628
Smp_024590	Chr_4	10762942	668	Chr_4	Sjp_0060880	SJC_S000692	22359	0.516	n.a.	n.a.	240.235	261.684	268.406	254.167	273.658	269.97	407.566	590.652	319.943	325.377	289.089	334.775	433.226	484.829	430.867	318.748	147.901	226.452	224.434	190.498	197.675	175.85	192.484	204.393	206.206	228.578	251.339	240.084	352.693	264.795	965.513	245.447	294.818	285.949	11.1221	230.987	290.157	143.914	76.9352
Smp_024780	Chr_4	11718884	27292	Chr_4	Sjp_0016210	SJC_S000077	150731	20.244	n.a.	n.a.	5.03523	5.13861	4.88579	4.64925	5.48414	4.49654	3.82314	2.52809	3.24332	3.38987	3.18909	2.92176	8.95778	11.4055	5.03544	5.72192	11.8636	6.56233	5.95956	9.95055	9.19739	10.1547	13.8669	13.0944	14.2955	15.4714	14.2921	12.848	11.6995	9.4723	14.0341	9.18804	10.8998	8.74794	0	22.6934	10.9063	11.8082	0
Smp_024800	Chr_4	11871332	1388	Chr_UP	Sjp_0016240	SJC_S000077	303835	1.919	n.a.	n.a.	13.2795	18.025	14.5585	14.6919	15.2024	12.8817	12.4235	13.5106	12.8968	9.48611	11.0052	11.8391	11.8533	18.8469	9.24234	7.89538	4.13235	7.54353	12.9705	5.91977	9.42226	4.34417	25.0507	26.6557	31.146	25.1945	27.5275	23.4975	23.5988	16.4144	51.5664	19.311	29.5607	22.4829	10.2184	17.4819	17.346	8.42671	0
Smp_024810	SC_0315	1404	761	Chr_UP	Sjp_0016250	SJC_S000077	310012	4.32	n.a.	n.a.	25.4453	26.6898	25.7458	29.1899	30.2014	30.6308	13.6234	6.59551	8.79562	36.5908	30.9099	31.645	42.1956	76.8273	36.808	18.3699	18.8427	19.5519	12.2364	40.4201	18.2941	39.9105	131.383	150.004	132.847	138.203	138.67	145.903	64.0119	154.173	61.3137	137.552	46.0981	150.816	12.6982	13.6171	3.61368	10.5139	0
Smp_024820	SC_0315	14385	31208	Chr_UP	Sjp_0110950	SJC_S007373	349	2.346	n.a.	n.a.	13.8082	15.1811	19.528	13.9909	17.0123	24.3593	1.71825	2.35997	1.98578	4.63339	5.1278	7.06836	7.50426	4.42797	5.44764	4.92402	10.0073	2.18961	1.52175	9.08	2.48734	9.04511	7.59627	11.5873	6.03938	16.2687	29.4243	32.8831	130.329	227.38	188.213	315.829	180.698	399.17	10.4226	18.3201	12.9645	51.2743	0
Smp_024850	Chr_6	11201303	756	Chr_6	Sjp_0034040	SJC_S000232	273807	0.648	Aut_Shared	Aut_Shared	772.858	713.309	604.617	813.681	709.701	524.201	1404.1	2452.74	1483.24	497.781	514.65	525.302	1178.12	1210.56	1239.21	947.706	379.725	906.794	805.555	332.745	903.458	399.676	606.286	637.803	558.863	549.376	494.377	395.627	1469.83	499.99	4817.07	507.537	1775.46	575.636	129.351	836.952	725.157	281.49	174.714
Smp_024860	Chr_6	11182182	8173	Chr_6	Sjp_0034030	SJC_S000232	265297	1.744	Aut_Shared	Aut_Shared	9.28728	9.54955	7.89582	12.4664	12.1974	11.7564	3.36799	0.69686	1.50257	5.63201	5.21169	3.36906	0.794609	0.532708	0.375703	0.416868	1.00005	0.134852	0.0379784	0.928005	0.309708	0.983679	9.59244	13.3861	10.1197	12.5295	9.6464	12.2303	4.49217	7.53932	1.52354	6.79314	2.57563	4.99825	0	0	1.15024	2.24472	0
Smp_024870	Chr_6	11123082	19726	Chr_6	Sjp_0034020	SJC_S000232	212964	6.252	n.a.	n.a.	26.3905	23.6878	25.5199	32.7336	33.4414	39.4231	13.7425	4.06058	11.2703	37.9357	33.5872	32.538	2.13815	2.18489	1.31103	1.10754	20.223	2.96126	2.69076	18.0714	4.9831	16.7328	87.4601	115.912	79.08	113.408	94.7553	139.883	57.3817	149.113	30.0191	133.174	52.9164	137.191	824.288	65.8517	43.3582	227.029	307.303
Smp_024880	Chr_6	11102021	14612	Chr_6	Sjp_0034010	SJC_S000232	167220	3.594	Aut_Shared	Aut_Shared	50.9556	39.1391	41.9988	51.205	49.549	45.6385	67.1997	53.0526	64.8924	55.0963	56.3444	57.6193	21.3683	17.9003	20.935	17.4011	17.1832	28.0214	26.3834	22.738	18.6223	25.875	235.161	235.01	173.366	212.222	198.954	206.817	296.341	220.942	422.588	225.629	303.593	245.674	47.3508	45.8882	46.3157	42.3369	24.7517
Smp_024900	Chr_6	11076506	14854	Chr_6	Sjp_0034000	SJC_S000232	131470	26.214	Aut_Shared	Aut_Shared	11.9209	10.3314	9.15241	11.0923	9.96194	9.08062	9.53836	4.71859	8.29711	8.13835	7.76064	7.76027	11.5569	7.48287	5.29893	8.78463	6.49679	7.49408	7.878	6.55282	10.9061	5.39739	57.3112	53.0951	48.7118	46.5005	46.3259	44.0897	47.0745	36.7953	41.7179	36.015	44.8546	37.4858	7.57318	16.6985	12.6081	10.2708	5.08582
Smp_024970	Chr_6	10850752	8285	Chr_6	Sjp_0021670	SJC_S000118	111147	17.546	Aut_Shared	Aut_Shared	8.12343	7.90015	6.27095	6.49135	7.0433	6.00013	4.51604	2.10874	2.77956	4.01562	3.55758	2.84268	18.3338	14.5375	6.88949	10.9506	9.77874	15.7307	13.6373	9.63776	19.0442	8.24824	36.283	29.5661	36.4138	31.1334	30.6819	28.2051	22.7677	17.9442	19.4449	16.8458	16.3018	14.3578	20.2959	21.526	22.5521	9.36599	23.8895
Smp_025010	Chr_6	10765021	8895	Chr_UP	Sjp_0021650	SJC_S000118	27510	6.732	n.a.	n.a.	47.2533	47.4612	47.9316	51.3189	51.22	44.7986	72.3332	101.277	68.596	51.6693	54.6214	59.1559	38.8743	33.0412	41.1295	41.1067	24.8257	29.2729	28.4051	28.778	26.2278	27.8934	330.154	357.272	326.578	354.448	348.032	307.296	487.646	312.369	1245.18	345.194	507.594	382.527	18.7135	47.649	48.7689	38.1169	11.8112
Smp_025020	Chr_6	10729517	16062	Chr_UP	Sjp_0021690	SJC_S000118	155801	9.609	n.a.	n.a.	6.13562	8.29275	6.88973	8.13081	8.11721	7.36972	9.19315	7.18112	5.62089	7.93219	8.20711	7.33767	6.23565	7.45539	4.346	3.25395	4.98152	2.55604	2.87942	4.22363	5.01668	4.08771	45.8162	61.9966	56.0705	52.3365	50.1152	51.4175	86.1472	65.9912	118.028	67.3782	58.0418	61.6017	29.7535	5.112	6.25353	7.82388	9.74579
Smp_025030	Chr_6	10702438	23154	Chr_UP	Sjp_0021710	SJC_S000118	179199	16.938	n.a.	n.a.	6.06902	4.56837	5.25312	6.79061	5.21493	5.95796	2.10788	0.33484	2.22611	7.71644	7.12594	7.73952	0.648231	0.496166	0.107567	0.235133	8.51537	1.48752	1.17971	5.50502	2.00424	5.70025	55.6848	62.7714	39.6653	46.1379	48.9689	54.5193	27.487	90.7914	8.52328	82.9538	31.0529	91.5654	37.7657	6.41179	5.60124	25.9901	8.47966
Smp_025130	Chr_ZW	36473758	3250	Chr_PSA	Sjp_0028480	SJC_S000177	47365	4.163	PSA_shared	PSA_shared	34.4457	32.9279	30.438	30.9646	31.9243	26.5465	33.8074	36.7189	28.8158	17.8057	19.3931	19.4459	33.1156	10.627	34.349	49.9306	19.1043	30.0971	28.1745	17.5677	37.6442	15.8044	52.5352	46.6501	50.8571	49.0985	48.6771	39.9058	68.6279	33.3021	133.63	36.1936	63.1886	39.7513	8.64806	38.6096	56.7442	21.202	21.9654
Smp_025150	Chr_ZW	36420314	9117	Chr_PSA	Sjp_0028500	SJC_S000177	71936	8.441	PSA_shared	PSA_shared	9.38958	10.3812	10.0548	10.0037	12.2165	9.80209	9.41461	8.43075	9.64112	7.44725	7.94925	7.34755	18.766	17.5168	19.7852	22.8961	5.88229	6.52803	7.93272	6.5629	9.25467	6.98113	52.0306	61.7912	58.1854	67.752	60.788	62.02	60.7812	43.527	90.4901	46.3023	66.614	46.6748	6.67995	24.1981	35.6247	31.046	22.7858
Smp_025160	Chr_ZW	36379193	11110	Chr_PSA	Sjp_0028510	SJC_S000177	98624	5.618	PSA_shared	PSA_shared	21.0271	20.9794	21.0465	18.7256	17.3095	18.403	21.9356	24.6613	19.0206	13.4273	14.4419	14.3864	22.0375	23.4372	17.2678	16.228	11.7967	14.1613	13.2429	13.8433	13.4043	12.0204	151.061	115.559	153.269	107.075	153.177	123.522	269.417	138.401	535.158	141.866	242.94	149.762	14.0333	2.99844	2.56022	4.20534	8.7311
Smp_025260	Chr_ZW	36072594	6968	Chr_PSA	Sjp_0117790	SJC_S009840	4218	2.19	S1_jap	S1_jap	19.2293	21.7613	17.4729	26.0039	32.1003	27.0904	16.7236	11.8388	14.6247	28.7042	29.7236	22.8348	7.95326	11.2207	7.10465	7.1277	3.64244	9.72763	8.24103	4.74702	5.81227	6.53815	43.9305	68.4266	44.1899	74.3329	45.3775	66.8418	44.1868	67.0682	52.2825	75.5555	39.41	61.1619	0	37.6506	38.441	20.3648	6.65859
Smp_025360	Chr_ZW	35844364	19733	Chr_PSA	Sjp_0013840	SJC_S000060	166720	3.794	n.a.	n.a.	5.2937	5.74034	4.85096	6.50687	7.04857	7.35875	3.67312	1.38809	3.53021	5.7991	5.77781	4.57717	6.22019	7.20499	3.08796	3.0758	4.58525	1.73145	1.3685	4.74045	2.00964	4.61742	11.923	16.0283	11.4153	16.3384	11.7086	18.2501	9.47995	14.4033	8.3216	16.4575	10.6814	12.7196	11.6861	2.47801	3.24369	11.3232	2.80413
Smp_025440	Chr_ZW	35680085	15719	Chr_PSA	Sjp_0052200	SJC_S000493	192583	7.643	PSA_shared	PSA_shared	3.84281	3.21828	3.2569	5.67089	5.96407	5.7457	2.78776	1.20142	2.6667	5.27759	4.75687	4.11714	6.31893	8.54443	3.39248	3.58193	5.99332	4.46988	4.60097	6.05819	5.31402	5.66866	15.7854	23.1641	12.4166	24.0452	15.1779	23.3004	23.0493	37.7966	17.832	34.7104	22.4048	32.4711	4.54482	11.5714	15.1582	11.1075	7.64778
Smp_025550	Chr_ZW	35399270	8499	Chr_PSA	Sjp_0112410	SJC_S007778	1506	10.66	PSA_shared	PSA_shared	11.9933	11.5132	9.14179	14.4346	13.3035	9.68504	7.35761	4.06628	6.54166	7.93641	8.07505	7.30015	17.6302	20.6115	11.4811	16.2376	8.87452	11.6712	9.13041	9.1472	9.97726	8.67119	31.8852	39.284	31.1214	34.3628	25.8045	26.8075	26.0762	24.5464	24.0686	24.9427	25.1081	24.0107	3.23652	19.5585	15.2703	8.78015	13.5887
Smp_025560	Chr_ZW	35351427	2534	Chr_PSA	Sjp_0107350	SJC_S005033	2395	2.065	n.a.	n.a.	71.2198	92.3143	85.6637	66.7714	88.3953	82.2475	59.5102	60.8807	48.927	54.0341	51.7829	53.0499	48.3103	24.6896	51.9714	62.4032	55.6255	22.2909	27.4384	32.8413	33.1306	31.3744	78.4659	78.968	97.5664	97.5121	106.606	99.9445	123.336	103.722	245.363	101.955	108.622	111.062	25.2574	38.689	26.8418	33.062	34.2903
Smp_025570	Chr_ZW	35341324	7370	Chr_PSA	Sjp_0098940	SJC_S003606	109631	2.072	PSA_shared	PSA_shared	6.14945	4.82271	5.55955	11.9823	10.1688	9.33388	6.61461	7.49476	7.86933	5.1829	5.41883	4.22209	17.6629	19.9018	12.7723	11.2998	21.0711	12.1879	11.3714	18.9815	14.3105	16.2113	6.36902	12.6347	4.97636	10.8854	5.81317	8.40625	23.7021	15.8028	49.4924	17.0883	29.3015	14.6062	17.8477	21.3004	21.7365	29.7527	23.6282
Smp_025620	Chr_1	29218209	10302	Chr_1	Sjp_0077700	SJC_S001312	257631	7.688	Aut_Shared	Aut_Shared	7.10691	6.46554	5.45954	4.32406	4.74333	5.10682	1.27336	0.140516	1.19299	5.38297	4.15529	3.44767	0.886056	1.10804	0.400726	0.392089	3.42405	0.722142	0.632726	1.90191	0.655211	1.92931	23.5824	14.4644	22.8029	14.7924	18.869	16.3053	3.77944	15.7238	0.751997	12.1681	4.37891	11.0457	2.69063	1.14222	3.74265	8.0423	4.53341
Smp_025670	Chr_1	29107468	3617	Chr_1	Sjp_0077630	SJC_S001312	163759	8.96	Aut_Shared	Aut_Shared	14.2206	18.4445	15.9154	16.5628	18.2695	16.1479	17.1344	18.0701	14.7857	13.6663	12.2476	11.0023	15.7705	17.9646	7.39522	8.25426	9.87138	7.16077	5.49224	11.9991	7.58137	11.9163	33.7299	40.1906	43.7492	41.2791	38.9913	38.5719	50.3393	36.758	96.0899	33.5185	48.582	31.467	10.8564	12.301	10.0882	9.84718	12.2289
Smp_025700	Chr_1	29074928	19237	Chr_1	Sjp_0077620	SJC_S001312	146474	16.74	Aut_Shared	Aut_Shared	1.59971	1.05611	0.980791	0.770884	1.19813	0.886023	0.928807	0.564667	0.547892	0.508518	0.654749	0.545991	1.01091	0.916713	0.574634	0.646359	0.178896	0.12891	0.290438	0.295703	0.285095	0.359879	16.0308	7.92606	9.4786	10.881	9.39264	8.74726	10.438	5.81592	11.6028	6.88115	7.73262	6.38762	3.89118	1.65381	1.08542	3.17784	0
Smp_025750	Chr_1	28928423	1405	Chr_1	Sjp_0007820	SJC_S000025	232186	4.24	Aut_Shared	Aut_Shared	12.0204	15.8326	18.2059	11.6118	14.0477	15.8444	14.5323	8.28051	9.64828	14.4245	12.5468	14.258	48.7139	50.31	36.2306	42.1992	60.725	38.4379	28.0573	57.5817	52.5466	51.3403	24.0476	23.3278	30.9912	27.0564	38.1443	30.5756	33.9884	29.7692	33.4067	27.1073	24.2695	32.722	23.8656	7.60808	14.4266	28.1567	6.72808
Smp_025800	Chr_1	28864112	1473	Chr_1	Sjp_0090370	SJC_S002287	51313	0.713	Aut_Shared	Aut_Shared	182.34	199.084	179.204	202.434	197.478	187.424	361.669	539.576	367.938	196.536	159.535	191.368	144.294	153.798	221.084	173.714	81.0904	168.166	141.186	137.309	103.679	139.937	154.541	178.275	173.553	175.24	164.415	172.93	324.757	156.591	881.357	135.604	371.535	168.545	118.819	123.587	139.787	128.296	186.776
Smp_025860	Chr_1	28700673	1417	Chr_1	Sjp_0091280	SJC_S002383	7182	1.446	Aut_Shared	Aut_Shared	453.128	434.301	409.674	487.056	568.549	542.027	518.911	581.141	415.706	1024.43	1141.05	1223.89	889.464	1041.57	669.792	464.598	929.472	142.727	129.46	709.661	205.727	553.342	2669.07	2951.96	2502.84	3406.28	2700.34	3233.79	4457.9	8187.2	8882.27	8992.82	3752.18	10127.4	436.802	493.963	390.986	1651.98	70.5325
Smp_025890	Chr_1	28661693	2312	Chr_1	Sjp_0072810	SJC_S001050	49290	2.263	Aut_Shared	Aut_Shared	11.8334	8.94456	8.89343	10.3512	8.14669	8.80311	5.19114	0.179014	3.08792	5.6714	5.84746	6.00056	1.88825	1.4717	0.309895	0.69884	8.12476	8.22321	9.26359	10.2061	5.83909	6.18194	7.08187	6.96843	5.92064	5.0259	5.98597	5.83851	4.08109	4.16064	0.258421	4.20631	2.77497	4.49589	2.41351	5.51614	2.57206	6.32788	0
Smp_025950	Chr_1	28521922	974	Chr_1	Sjp_0094070	SJC_S002602	2580	3.633	Aut_Shared	Aut_Shared	36.142	44.22	42.8236	52.2383	49.4075	41.5063	69.0779	86.5673	63.3142	41.167	43.6351	47.1532	95.1628	71.4456	107.889	115.615	52.7049	63.3679	67.5608	49.318	79.2638	42.1882	54.7271	78.1378	66.7016	70.1236	66.2105	62.5429	114.31	61.9977	263.576	68.0664	115.382	76.9729	6.0439	41.1866	47.433	41.2683	0
Smp_026040	Chr_5	85378	32821	Chr_5	Sjp_0113840	SJC_S008095	265	11.928	Aut_Shared	Aut_Shared	2.08211	1.73994	1.65398	1.63457	1.56259	1.36537	0.762793	0.226419	0.598051	1.29558	1.43436	1.06181	0.694748	0.4236	0.252603	0.434492	0.86068	1.32643	1.1065	1.0399	1.04116	1.08868	12.7329	9.4339	9.97862	7.79136	10.334	8.86874	5.83896	8.3766	3.57691	9.0033	4.70321	7.24351	6.61343	9.35394	9.80192	6.5843	11.1264
Smp_026090	Chr_5	216856	12568	Chr_5	Sjp_0050910	SJC_S000478	32707	6.373	Aut_Shared	Aut_Shared	3.96475	3.7792	2.99178	3.85169	3.75113	3.28563	2.36741	1.5044	1.85034	2.54816	2.16028	2.00782	4.11092	3.31575	3.10287	3.11334	3.34294	2.65277	2.09928	3.38622	2.85322	3.26952	41.7669	49.9287	56.9256	36.1456	38.5203	47.3077	68.0268	66.6323	71.8067	61.6648	56.4651	60.9933	7.51414	15.966	12.5724	8.18049	6.35078
Smp_026160	Chr_5	366284	19772	Chr_5	Sjp_0081530	SJC_S001580	17460	12.427	n.a.	n.a.	34.2005	37.4838	40.4455	35.8259	33.453	34.2146	41.6313	55.364	34.7585	41.4799	43.9597	46.9135	36.0304	21.6686	43.6311	51.0699	20.9809	16.9598	13.7679	14.6195	18.2431	20.5567	316.115	323.909	340.644	297.561	383.958	312.776	357.717	330.519	864.386	347.733	332.289	394.019	54.2472	12.9564	7.48599	11.0169	47.4282
Smp_026230	Chr_3	13703169	7828	Chr_UP	Sjp_0029800	SJC_S000191	269675	2.252	n.a.	n.a.	34.0435	39.7076	48.8	29.7103	38.4135	46.1031	17.286	13.7315	11.1191	34.1946	34.4845	26.8445	20.4457	10.2591	7.26991	7.43946	13.482	2.81591	3.52905	12.515	4.36533	10.6697	200.572	187.423	267.574	245.462	334.324	305.163	102.226	187.209	133.698	178.359	70.3189	152.122	7.6712	16.3623	6.47374	56.7074	0
Smp_026250	Chr_3	13611505	20786	Chr_3	Sjp_0029820	SJC_S000191	353901	18.759	Aut_Shared	Aut_Shared	6.10155	5.9415	5.37137	6.05665	6.69586	5.3951	5.11425	2.39709	6.13094	6.0249	5.85704	5.01843	8.82984	9.79178	4.65663	6.12893	4.54613	3.68514	4.42017	5.04764	5.23639	4.70583	23.5508	23.5288	22.2536	25.8002	22.6223	22.0361	21.9689	22.8496	18.5991	22.7025	28.286	20.906	3.92423	0	0	0	0
Smp_026280	Chr_3	13580881	6079	Chr_3	Sjp_0029850	SJC_S000191	384987	9.376	Aut_Shared	Aut_Shared	5.80439	5.11023	4.84381	5.02665	4.47278	5.67628	4.18874	2.4772	3.41597	7.44489	7.49867	7.72891	10.6001	13.1204	6.91452	5.84731	12.714	5.57511	6.68894	14.7988	7.98084	13.7028	47.61	41.1889	45.5586	38.7276	44.1721	49.4943	36.2901	61.5406	38.6821	59.6044	28.7482	63.7276	13.9029	6.52605	7.2384	11.506	4.75393
Smp_026300	Chr_3	13521497	10600	Chr_3	Sjp_0029870	SJC_S000191	441958	1.713	Aut_Shared	Aut_Shared	12.1029	12.4147	14.918	20.2254	17.0306	15.8739	28.1711	17.2638	22.3516	17.3547	13.6552	14.711	11.6102	13.1747	10.3963	9.78511	10.9709	8.3441	7.49639	7.8708	11.8204	7.87949	45.3088	73.3453	54.0338	60.4004	48.0548	56.7758	131.948	73.2763	148.919	57.6672	97.905	59.7881	13.5885	6.3392	5.50545	5.84694	9.1371
Smp_026310	Chr_3	13500267	3320	Chr_3	Sjp_0029890	SJC_S000191	458015	0.721	Aut_Shared	Aut_Shared	42.5331	42.6444	40.4015	49.4146	52.5449	46.79	50.4776	35.0232	44.4219	41.2324	39.673	34.7703	27.5814	34.526	32.8026	43.7467	24.9642	44.6503	40.2956	30.4602	51.8448	36.9289	28.4807	28.6885	29.113	33.3435	28.5183	28.4054	38.7633	29.9451	44.9186	27.2732	34.7162	27.0235	12.6777	47.3535	47.9495	30.3077	4.27008
Smp_026340	Chr_3	13401203	300	Chr_3	Sjp_0029910	SJC_S000191	554211	2.072	Aut_Shared	Aut_Shared	33.8741	37.5924	38.3417	44.409	42.2395	40.4936	92.0487	156.347	84.1737	59.4769	60.5103	64.8438	353.701	391.966	340.27	211.566	121.406	135.932	104.5	158.715	139.218	140.693	197.88	279.33	227.631	252.347	250.975	256.139	793.752	478.811	2382.22	490.928	795.987	518.689	0	49.3457	27.436	140.741	0
Smp_026390	Chr_3	13247112	7009	Chr_3	Sjp_0029940	SJC_S000191	674460	6.307	Aut_Shared	Aut_Shared	12.3954	13.4469	12.7011	11.2979	12.9773	13.5798	17.8592	19.8261	16.9196	16.6948	16.5306	14.9678	3.51067	5.05293	2.46308	2.70611	3.33471	2.08353	3.14427	2.7053	3.7318	3.02691	71.7491	66.8651	79.1938	70.5263	79.1715	75.6478	109.272	94.0266	220.64	98.5299	116.836	90.7162	9.41283	24.1361	21.2679	15.5054	16.1899
Smp_026400	Chr_ZW	55300367	966	Chr_PSA	Sjp_0022070	SJC_S000120	513652	2.583	PSA_shared	PSA_shared	1.42134	0.991955	1.07648	1.41191	1.72553	1.01332	6.68827	6.6394	8.11611	0.557721	0.258739	0.960444	14.9772	6.51441	9.99523	17.3804	0.445319	29.6645	26.9911	0.872393	48.0395	0.462366	3.14725	3.0071	2.30973	3.77758	1.87553	1.65473	14.6047	0.975516	23.9937	0.575177	20.657	2.23624	0	22.2307	30.9847	0	20.9096
Smp_026560	Chr_ZW	54713078	4626	Chr_PSA	Sjp_0063680	SJC_S000764	73753	10.449	PSA_shared	PSA_shared	53.7369	60.0769	62.3449	61.3611	66.7554	70.3611	95.7948	101.616	86.0761	129.923	137.835	152.488	143.757	122.312	172.589	175.394	253.773	158.079	166.404	366.031	99.7688	374.859	977.645	1116.54	1089.16	1146.09	1153.21	1268.22	1520.98	1913.11	2951.12	2031.72	1481.71	2378.21	0	0	3.97127	0	0
Smp_026670	SC_0013	158984	47518	Chr_UP	Sjp_0069080	SJC_S000935	46926	3.506	n.a.	S1_jap	3.38785	4.82334	4.34307	3.92077	3.29372	2.82031	0.886949	0.346641	0.373715	2.76419	3.50746	3.01659	0.950623	1.05253	0.426493	0.272757	0.0814766	0.110173	0.0522577	0.0931088	0.124295	0.225588	13.0498	15.2342	20.0092	12.8334	18.053	8.70717	3.61119	10.0159	2.93274	11.9955	1.68709	11.0974	0	0.975002	1.28093	0	0
Smp_026770	Chr_6	16140270	7991	Chr_6	Sjp_0092330	SJC_S002490	4570	0.752	Aut_Shared	Aut_Shared	99.0775	85.5209	67.612	78.3408	73.8171	72.1259	103.226	152.095	86.3429	49.9819	48.88	53.6517	46.7035	31.1429	94.4511	83.6637	20.1514	27.9296	31.6962	20.5647	33.3128	27.0525	206.973	162.616	163.043	149.886	125.038	149.253	308.967	154.118	963.354	169.173	303.417	169.549	308.495	275.444	326.895	235.765	862.264
Smp_026820	Chr_1.unplaced.SC_0071	315476	18816	Chr_UP	Sjp_0073550	SJC_S001104	18417	16.706	n.a.	n.a.	0.129271	0.260731	0.229845	0.327453	0.15765	0.182788	0.151669	0.0484985	0.113287	0.297893	0.304038	0.218841	0.19175	0.151667	0.154126	0.0896029	0.792562	0.175725	0.197958	0.593442	0.538105	0.581569	0.96492	2.05013	2.15762	0.885662	1.32375	1.40149	1.6021	2.77722	0.853852	2.79395	1.40339	1.55977	0	1.62719	2.13573	5.21098	6.47343
Smp_026830	Chr_1.unplaced.SC_0071	340494	884	Chr_UP	Sjp_0073540	SJC_S001104	12654	2.605	n.a.	n.a.	6.96379	6.78668	7.92916	6.03069	8.39925	6.92172	11.6719	18.0394	11.1213	7.69188	8.5689	8.62111	50.4054	62.2057	35.1601	27.8531	62.7749	29.9226	27.388	46.4742	48.6778	41.6835	48.4843	36.6487	37.9449	48.6738	44.0168	38.3171	110.689	67.1568	287.811	55.7951	125.754	73.7084	0	13.692	13.9017	17.2848	24.3764
Smp_026910	Chr_3	22984680	16236	Chr_3	Sjp_0085940	SJC_S001836	24365	14.74	Aut_Shared	Aut_Shared	12.439	11.125	12.2526	15.5493	13.2221	14.5708	27.7538	30.9007	28.7412	23.0474	24.1848	23.7311	26.6686	25.5562	23.7015	29.0756	23.89	20.8401	16.7664	29.0928	16.6037	36.6702	73.8103	93.2253	69.3093	76.8755	77.5727	89.9859	198.798	149.994	403.566	157.857	224.556	169.112	193.139	74.2076	64.399	105.458	148
Smp_027080	SC_0322	22364	11237	Chr_UP	Sjp_0049330	SJC_S000456	48448	7.896	n.a.	n.a.	11.2958	13.856	13.7169	16.4853	15.3176	13.0753	29.8432	43.9346	27.3982	16.3372	15.794	16.9992	11.3983	10.5785	10.8089	10.04	4.31314	7.47876	6.73996	3.54357	8.10935	3.4978	97.7118	146.18	119.041	129.09	122.082	115.211	263.688	130.989	696.689	130.308	268.24	143.696	6.60951	61.9656	53.7927	9.03391	45.0812
Smp_027210	Chr_4	26516161	641	Chr_4	Sjp_0003980	SJC_S000010	1006706	0.651	Aut_Shared	Aut_Shared	26.8706	23.2213	27.661	23.2702	22.7178	26.1339	45.1135	62.436	44.055	26.957	26.2812	27.6784	10.413	21.1758	11.3372	8.10983	1.34221	6.87768	14.0429	0.657357	2.6326	1.39359	20.6944	16.1473	17.9126	14.0928	23.0569	17.5668	39.3477	22.8643	102.786	21.6093	42.4611	22.6096	0	4.75197	15.7336	12.2205	0
Smp_027220	Chr_4	26506818	5300	Chr_4	Sjp_0003970	SJC_S000010	1002165	3.562	Aut_Shared	Aut_Shared	30.3751	27.8377	26.2806	32.8026	28.5518	29.6376	46.4956	60.1255	41.9746	28.3839	29.6449	32.0376	25.3511	26.1216	19.9043	17.1977	10.3351	11.9573	9.78045	9.1826	12.5766	10.1127	138.288	153.822	122.662	136.717	125.92	130.023	211.329	117.623	511.397	130.969	214.802	141.717	0	39.6825	41.8556	22.4093	25.4498
Smp_027240	Chr_4	26426934	524	Chr_4	Sjp_0015030	SJC_S000069	70523	0.423	Aut_Shared	Aut_Shared	112.32	126.597	118.321	108.434	111.594	95.5663	231.433	334.238	186.194	99.3832	117.549	120.383	158.365	183.283	222.158	133.325	32.2907	32.0759	29.6181	36.186	61.993	19.6047	105.533	95.2736	116.865	101.477	126.528	92.741	235.946	97.8727	622.57	112.429	205.95	119.143	0	46.6429	20.7717	5.01499	0
Smp_027250	Chr_4	26406205	3833	Chr_4	Sjp_0015040	SJC_S000069	82813	4.14	Aut_Shared	Aut_Shared	7.04218	7.98373	6.10862	7.11501	6.65523	6.91936	5.25785	4.95785	5.41539	5.47261	6.19894	6.30772	19.833	15.3869	14.0193	12.2335	22.3712	20.2717	20.731	25.8338	12.6573	23.8879	45.1845	52.1548	50.5178	49.8973	40.1095	55.0116	42.5907	44.7044	81.633	48.2237	51.4782	55.6492	43.9305	76.9266	54.5152	57.8363	15.084
Smp_027290	Chr_4	26337681	1633	Chr_UP	Sjp_0015070	SJC_S000069	154790	4.337	n.a.	n.a.	0	0.0590781	0.0915888	0.032342	0	0.0670565	0.0265557	0	0.100703	1.02669	2.09573	2.79986	0	0	0	0.0860363	1.22933	0	0	2.4513	0	0.820536	0.26389	0	0	0.121107	0.255545	0.0901845	0.438149	4.02547	0	7.52345	0.307043	12.5127	0	0	0	2.01005	0
Smp_027340	Chr_4	26026789	1256	Chr_4	Sjp_0015170	SJC_S000069	387046	0.466	Aut_Shared	Aut_Shared	180.739	130.86	161.389	161.338	170.422	251.819	172.264	272.39	108.094	163.563	155.464	128.889	34.9593	33.3534	29.4458	31.1812	41.6707	78.7563	76.1166	47.303	89.0101	37.8724	123.851	110.478	92.4858	122.178	112.836	174.843	126.521	118.6	372.146	111.374	91.5806	100.859	0	36.9317	35.0526	24.9821	24.538
Smp_027370	Chr_4	25988322	1415	Chr_4	Sjp_0015190	SJC_S000069	430008	2.797	Aut_Shared	Aut_Shared	40.3043	45.0701	38.4865	41.7242	41.7934	42.3707	42.7005	45.2373	40.2864	41.8126	44.2044	45.9352	74.1226	54.0139	78.0012	79.582	50.8715	28.6247	24.3492	59.557	35.7773	51.9245	126.875	130.76	142.625	130.453	128.234	134.58	149.071	130.702	280.165	139.185	158.109	151.135	20.4501	14.2573	13.5835	26.1434	27.8747
Smp_027450	Chr_4	6414700	7931	Chr_4	Sjp_0064970	SJC_S000806	16131	9.089	Aut_Shared	Aut_Shared	10.1695	10.3459	10.1101	10.8183	10.6769	10.6231	9.1869	6.22512	9.00181	7.70879	6.67661	6.59385	10.0082	11.5328	4.19431	5.56692	3.86913	3.89108	4.03114	5.60511	5.21292	5.40637	35.4759	38.6961	36.347	38.7685	37.7073	38.7161	36.1767	27.924	45.2097	23.7486	38.3886	25.1048	1.25844	3.49314	4.18781	5.1181	4.22229
Smp_027480	Chr_4	6474612	8016	Chr_4	Sjp_0055480	SJC_S000572	5007	2.992	Aut_Shared	Aut_Shared	65.0335	70.2212	80.7186	69.4774	70.2846	76.6912	75.0235	79.8843	53.2797	75.1111	74.2035	80.8642	35.607	36.6415	34.9948	28.2712	19.1763	13.165	13.1656	18.03	15.6834	18.248	228.204	261.597	248.835	255.965	309.847	291.776	280.64	248.486	549.793	252.839	224.981	294.813	64.1012	20.8819	21.0409	19.309	52.8927
Smp_027500	Chr_4	6527502	6106	Chr_4	Sjp_0073300	SJC_S001082	23328	6.254	Aut_Shared	Aut_Shared	1.83017	1.39296	1.60904	1.30085	1.16619	1.11605	1.32593	2.28875	0.69835	1.2355	1.04726	1.19003	0.750428	0.509314	0.385546	0.414175	0.328775	0.31588	0.610018	0.207026	0.41455	0.109723	20.4742	15.231	15.9973	10.3683	20.9663	14.4767	23.4444	17.069	89.9629	14.6768	19.1674	18.2599	0	0	0	0	0
Smp_027850	SC_0241	51567	4942	Chr_UP	Sjp_0002000	SJC_S000004	487554	1.444	n.a.	n.a.	45.1662	49.1506	46.5808	61.877	63.8364	52.3644	49.5304	17.5809	40.0251	36.2778	31.3797	34.9934	8.45411	10.8309	7.26958	7.33474	14.4785	14.7191	13.2525	12.8746	18.0974	12.0202	27.8381	39.892	30.4101	38.0206	31.1992	33.7165	37.2232	24.5497	23.9112	21.4288	32.9086	25.234	6.58207	23.0657	12.835	18.7968	0
Smp_027870	SC_0241	76199	4403	Chr_UP	Sjp_0002010	SJC_S000004	513346	13.158	n.a.	n.a.	8.69881	8.29537	6.89304	7.86726	6.60529	6.98437	5.55816	2.08332	5.81976	6.08135	6.03411	4.58453	29.4668	14.3007	16.8614	27.1868	38.3314	46.1836	38.5618	29.332	57.1058	30.2294	15.0421	14.1752	14.5331	11.3073	12.4549	12.3466	11.339	11.5068	7.71803	11.3996	13.1361	9.3856	2.42498	22.6152	22.1897	14.7927	8.13513
Smp_027880	SC_0241	92695	2856	Chr_UP	Sjp_0002020	SJC_S000004	536712	0.413	n.a.	n.a.	651.018	678.709	665.24	671.45	646.041	612.632	947.032	901.112	912.623	569.515	638.224	638.622	84.2237	94.1699	57.1262	45.455	76.8677	47.2735	58.0365	56.6543	62.6312	49.2623	415.089	489.534	457.289	441.843	492.668	449.515	843.876	445.358	1462.13	528.437	906.333	546.016	122.936	33.0028	21.3455	33.0696	90.547
Smp_027910	SC_0241	206922	7232	Chr_UP	Sjp_0086000	SJC_S001839	28165	3.731	n.a.	n.a.	22.5164	21.0142	19.9444	16.7674	19.8738	18.9803	14.4467	6.87667	14.5544	16.3572	15.0825	13.7534	28.282	39.0758	16.4882	15.8137	15.9413	16.5734	13.5627	18.4697	18.317	18.2808	77.5984	64.3872	74.745	70.7264	74.9696	72.3254	60.9665	59.1935	48.3386	55.2757	63.9803	53.1316	3.09215	19.6978	24.108	26.9036	10.4326
Smp_028050	Chr_1	33377070	35982	Chr_1	Sjp_0029390	SJC_S000186	219033	25.964	Aut_Shared	Aut_Shared	2.20419	1.43091	1.4279	2.0529	2.33305	1.35533	1.35737	0.254844	1.85595	1.45268	1.15832	1.08121	1.50106	1.15713	0.766143	1.70829	0.15542	1.14099	0.836767	0.0878285	1.30143	0.285499	10.2564	9.00606	6.7702	10.8035	6.35266	6.0273	6.82847	6.40506	2.36665	5.23765	10.2456	5.29045	1.29216	5.20408	6.45054	0.350369	0
Smp_028060	Chr_1	33370444	960	Chr_1	Sjp_0029380	SJC_S000186	215476	1.479	Aut_Shared	Aut_Shared	45.7036	53.3579	53.8938	58.5159	64.1065	60.1705	73.8222	43.5512	65.0643	74.7348	73.4749	77.7769	268.493	285.681	164.868	110.495	99.7774	74.9117	67.5761	73.7391	90.0877	55.1328	73.4564	90.2433	78.7147	97.7141	88.6595	101.628	130.408	120.112	142.772	120.14	124.693	131.333	12.8795	38.4135	28.9054	28.1587	10.9751
Smp_028070	Chr_1	33341447	15527	Chr_1	Sjp_0134430	SJC_S027944	1080	2.146	Aut_Shared	Aut_Shared	27.2718	31.8785	33.873	25.4913	30.776	29.6787	14.3294	3.77547	13.0251	22.7629	26.1599	19.7132	8.55576	3.59576	6.45357	9.17978	12.1718	5.53665	5.15763	11.642	5.70578	11.42	50.4591	46.6371	55.5071	49.1092	62.9048	55.3011	30.9359	43.4439	15.9101	50.898	29.1866	40.448	0	0	0	11.4708	0
Smp_028140	Chr_1	33121201	21010	Chr_1	Sjp_0069410	SJC_S000955	9351	17.822	Aut_Shared	Aut_Shared	7.1494	8.28099	7.7563	7.63435	7.80952	7.24531	6.77254	2.22762	6.05301	4.69562	4.74749	3.69247	3.13743	2.35089	0.932115	1.56981	3.59676	1.41637	1.50693	3.20888	1.92765	2.77426	22.0379	23.7516	25.4547	23.4458	24.9975	22.1204	22.9225	14.2383	13.4554	14.8974	22.2647	11.8153	4.05846	2.58096	0	6.78755	0
Smp_028150	Chr_1	33094895	17448	Chr_1	Sjp_0091540	SJC_S002424	4763	1.471	Aut_Shared	Aut_Shared	1.46812	2.09019	2.61033	2.38388	1.92814	1.8782	0.782951	0.183598	0.890716	1.69157	1.81733	1.59773	0.188173	0.184527	0.0958151	0.10468	0.427351	0.126335	0	0.434697	0.0241789	0.140793	3.18896	3.27605	5.43294	2.92702	4.99983	3.73656	1.5128	3.67137	1.07501	4.32937	2.47363	4.4886	4.46256	1.89771	0	2.43177	0
Smp_028200	Chr_ZW.unplaced.SC_0115	130305	22528	Chr_newZ	Sjp_0009420	SJC_S000031	1183079	27.019	n.a.	S1_mans	7.68917	8.51576	8.37007	7.7612	8.70537	8.88542	5.95916	2.90873	6.47657	9.68445	11.3387	10.3078	3.58106	2.22008	3.73166	6.42366	15.6772	4.86789	4.80863	16.4409	5.71163	17.3876	49.8361	51.2067	56.6528	55.728	57.3237	59.5218	41.516	60.6254	36.6733	71.6317	49.9891	70.3104	53.3733	29.3509	30.1987	80.4844	23.2642
Smp_028330	Chr_ZW.unplaced.SC_0115	423501	3700	Chr_newZ	Sjp_0009350	SJC_S000031	885276	3.826	n.a.	S1_mans	45.0999	47.4138	50.1803	48.3934	51.6278	46.2536	69.6571	84.8475	59.854	47.8532	49.1897	53.2722	41.5013	41.61	103.59	75.299	42.6303	26.3622	26.0063	52.2152	28.7331	48.0445	166.984	187.845	173.59	180.741	187.943	173.139	319.799	203.852	709.636	209.216	306.466	242.521	87.731	66.9803	51.9701	83.0478	70.0861
Smp_028340	Chr_ZW.unplaced.SC_0115	430709	10852	Chr_newZ	Sjp_0009340	SJC_S000031	877359	5.048	n.a.	S1_mans	18.9521	19.2369	17.1804	19.3118	18.2205	14.9214	37.942	43.4962	37.059	15.177	14.2985	14.9245	6.46322	5.35383	20.0552	20.5269	5.12683	6.42378	5.57754	6.13489	5.75354	7.05857	57.4556	60.0978	55.3111	53.3716	54.0747	45.7058	116.774	44.3106	246.656	41.6913	126.507	46.5496	15.3398	20.6703	32.8949	19.524	8.6791
Smp_028360	Chr_ZW.unplaced.SC_0115	516885	10256	Chr_newZ	Sjp_0009290	SJC_S000031	822009	3.496	n.a.	n.a.	15.011	18.689	15.6798	10.7528	13.0967	12.9773	13.2435	5.29174	7.07925	10.7887	10.3613	8.29133	1.99817	2.40083	2.37855	2.41103	3.38349	0.295525	0.36318	4.17011	0.411344	2.87428	31.4699	24.1974	37.7244	28.1366	36.2119	28.9768	31.7657	24.5916	24.8175	23.2435	19.8574	21.1865	3.82295	4.06176	3.19867	7.28418	0
Smp_028370	Chr_ZW.unplaced.SC_0115	547155	224	Chr_newZ	Sjp_0009280	SJC_S000031	804010	2.651	n.a.	n.a.	0.325855	0.676557	0.449514	0.529111	0.687792	0.767924	0.173779	0.203751	0.439329	0.395211	0.403364	0.443277	1.12749	0.490001	3.50319	1.25444	0.640146	0	0	0	0	3.9879	1.40833	1.84137	2.09941	2.26214	1.8184	1.68454	0.9743	1.62137	1.66163	1.25473	1.63863	1.30087	0	0	0	0	0
Smp_028410	Chr_ZW.unplaced.SC_0115	730006	783	Chr_newZ	Sjp_0009200	SJC_S000031	636024	0.318	n.a.	n.a.	65.1955	72.5156	76.6128	83.8076	77.0873	56.2443	142.335	303.619	135.511	63.8342	67.673	67.7485	178.371	205.035	352.945	273.055	128.193	61.2305	61.0488	85.8338	50.1077	69.8774	121.705	128.948	85.0829	115.56	119.211	80.317	408.791	135.284	1653.81	201.906	540.386	255.849	9.95473	78.7465	106.959	62.9119	17.1508
Smp_028490	Chr_ZW.unplaced.SC_0115	856152	39666	Chr_newZ	Sjp_0118370	SJC_S010128	14510	6.646	n.a.	S1_mans	1.8847	1.19514	1.65359	0.949749	1.0974	2.4724	0.849147	0.304776	0.70097	1.7932	1.26706	1.45383	0.301073	0.201077	0.186649	0.207207	0.983281	0.173661	0.203457	1.14727	0.24462	1.23862	14.0092	14.8824	18.7953	9.64385	23.7409	19.1506	37.7977	55.4413	33.0577	41.6041	25.8085	66.858	12.001	6.38892	3.36342	19.6653	20.4255
Smp_028650	Chr_ZW	4745512	19799	Chr_Z	Sjp_0009090	SJC_S000031	163382	21.625	n.a.	S1_mans	3.68506	2.95025	3.10429	2.51671	2.85738	3.1335	2.00253	0.724355	1.6965	2.81608	3.16468	2.41516	1.97355	1.49126	0.918475	1.42278	2.629	1.11334	0.956323	2.52194	0.958853	2.583	37.544	25.706	31.1297	30.1782	35.4964	32.2666	23.791	29.9239	15.4645	33.1193	22.1434	27.7709	0	7.58361	4.14295	12.9465	0
Smp_028930	SC_0194	340789	2887	Chr_UP	Sjp_0069210	SJC_S000942	40553	0.71	n.a.	n.a.	193.452	162.755	154.226	154.887	159.792	143.159	186.871	163.184	145.993	165.64	163.033	172.499	18.296	14.2444	12.7396	9.38027	9.18866	8.11246	5.69833	5.47323	5.40677	5.80159	121.152	99.3471	101.766	92.345	97.2577	90.5484	131.771	105.671	206.645	99.8038	113.384	117.422	8.77074	16.8565	17.3148	14.4334	15.0569
Smp_028980	Chr_3	4746123	1380	Chr_3	Sjp_0033590	SJC_S000226	422981	0.583	Aut_Shared	Aut_Shared	115.203	125.694	119.007	115.727	123.71	108.498	187.673	327.978	186.286	120.63	126.557	139.304	96.6045	122.725	142.504	110.463	38.0302	47.3205	44.9851	38.7779	60.8355	36.5731	109.75	107.344	109.577	110.496	107.103	100.891	156.561	89.6217	495.372	101.064	170.593	113.688	12.9053	21.0341	20.4179	15.2332	21.8508
Smp_029060	Chr_3	5103520	17289	Chr_3	Sjp_0033520	SJC_S000226	209064	9.218	Aut_Shared	Aut_Shared	2.88166	3.05754	3.79208	2.89117	3.51648	3.51778	4.17308	3.89668	3.44294	2.75622	3.43659	3.08789	6.87201	4.42918	6.0445	6.86071	4.45381	3.82491	3.28548	5.19122	4.70945	4.28845	21.7111	21.6157	23.9916	27.0578	28.1613	28.7261	29.8746	18.2306	55.2271	22.4782	28.1198	23.1822	27.1132	24.9829	25.2455	19.7013	22.9687
Smp_029100	Chr_3	5256006	1875	Chr_3	Sjp_0067570	SJC_S000873	12621	0.444	Aut_Shared	Aut_Shared	144.46	156.965	147.318	158.907	166.546	141.809	328.915	501.215	258.704	180.517	180.026	177.622	60.9409	75.1443	79.3357	59.7956	14.9128	13.6666	14.8991	14.0455	23.625	11.9105	103.207	138.389	132.964	126.537	136.177	112.25	301.444	149.609	847.058	143.631	276.399	150.305	0	5.75972	11.7477	4.85539	0
Smp_029150	Chr_3	5449662	2315	Chr_3	Sjp_0040280	SJC_S000308	322755	4.166	Aut_Shared	Aut_Shared	48.0545	49.018	53.3632	49.8983	52.1315	47.4352	70.8283	130.984	66.0469	55.1704	61.5704	67.9176	78.97	83.225	98.9054	77.1825	28.3688	56.0596	66.9064	49.5082	34.4424	53.8289	232.312	250.719	247.591	260.41	282.5	236.581	422.48	307.611	1440.57	338.018	430.825	389.708	95.0847	247.059	354.525	271.922	82.3896
Smp_029160	Chr_3	5458079	29952	Chr_3	Sjp_0040270	SJC_S000308	291704	28.123	Aut_Shared	Aut_Shared	7.51019	6.2682	6.43131	5.87544	6.00078	9.20362	5.58189	2.42002	6.20161	11.7677	13.384	11.867	2.56817	3.88685	1.52296	1.26767	7.90403	1.76626	2.42498	11.4655	2.74658	9.81212	61.0278	48.3026	50.056	47.148	56.0873	76.2758	46.9765	89.0519	35.6877	102.135	56.6408	96.3729	14.9412	13.7401	11.7719	58.8512	0
Smp_029210	Chr_3	5569137	5228	Chr_3	Sjp_0040220	SJC_S000308	217984	3.556	Aut_Shared	Aut_Shared	14.5148	19.2383	17.5376	18.2237	19.5414	16.1932	16.7123	14.3542	15.2706	14.9893	16.2758	15.3115	17.8052	20.1059	9.88039	9.5134	10.8888	13.545	13.3587	11.1225	14.5251	10.6364	18.4863	23.5663	26.9454	25.6404	23.9354	22.2524	26.3171	21.1646	41.4414	23.5461	26.6876	22.831	18.3808	17.8342	24.103	11.415	17.6933
Smp_029360	Chr_3.unplaced.SC_0124	972911	26948	Chr_UP	Sjp_0070770	SJC_S000986	13082	20.236	n.a.	n.a.	5.51747	5.31791	5.1887	4.02032	3.89448	5.33187	3.81327	2.35559	4.1223	4.03839	4.18775	3.80043	2.17565	2.28226	1.24708	1.32296	2.39981	2.1063	2.40734	2.4158	2.53613	2.22096	74.9498	50.3166	69.3965	49.7079	71.4278	73.3954	58.2279	51.0937	60.6012	56.3142	64.2763	54.4675	4.34214	16.5814	17.4955	11.2	14.609
Smp_029370	Chr_3.unplaced.SC_0124	955838	3858	Chr_UP	Sjp_0057060	SJC_S000597	35860	2.532	n.a.	n.a.	26.7818	24.3876	21.1265	17.5611	21.1234	19.641	29.4298	19.5194	21.6764	19.4996	21.38	24.701	6.85494	9.97648	4.9877	4.39737	7.35919	8.99888	8.28692	11.0311	7.98259	9.49323	140.797	97.9975	122.313	94.881	115.579	104.031	125.912	77.8384	145.439	85.4561	101.616	102.935	0	15.1531	21.3431	26.3614	17.2688
Smp_029480	Chr_3.unplaced.SC_0124	339504	11703	Chr_UP	Sjp_0092050	SJC_S002470	26148	0.902	n.a.	n.a.	2.87309	1.98842	0.440378	2.02159	1.79683	0.644842	0.638426	0.449122	0.3228	0.871151	0.740935	1.44756	1.59696	1.57877	0.516012	0.57325	0.612632	1.10658	0.610027	0.720099	1.44194	0.190825	0	1.32746	0	0	0	0	0	0	0	1.85447	0	0	4.44673	0.945477	3.72577	0	0
Smp_029670	Chr_3	18646969	22890	Chr_3	Sjp_0012020	SJC_S000048	925006	17.974	n.a.	n.a.	1.46585	1.02637	1.31125	1.56859	1.52165	1.77983	2.88347	1.66034	4.08221	3.18409	2.20122	2.07035	1.48165	1.20517	0.979272	1.11097	9.64722	1.45653	1.41028	7.43695	2.45126	6.73187	21.209	24.3069	17.4867	22.3509	20.2849	27.2031	46.6627	47.3275	52.2099	33.126	73.3211	33.6993	164.395	15.1669	18.5462	39.4729	56.1477
Smp_029700	Chr_3	18685589	4195	Chr_3	Sjp_0011960	SJC_S000048	860773	1.151	n.a.	n.a.	64.9194	61.885	65.9158	74.7037	67.5897	57.6089	66.2414	31.09	52.3642	49.7227	46.2194	46.1702	11.5936	7.54411	8.38514	8.49012	8.92145	8.60438	7.99116	9.74315	10.2577	7.98531	38.7704	46.6216	37.7991	42.0796	42.112	35.0105	46.9872	32.8249	39.3997	29.7514	40.3909	31.9783	6.50861	5.58876	5.51863	4.5155	4.20112
Smp_029740	Chr_3	18771413	14090	Chr_3	Sjp_0011940	SJC_S000048	797589	13.336	n.a.	n.a.	3.98367	3.66964	4.09055	3.91268	3.85862	4.19793	3.63583	2.45041	2.89288	2.93626	2.39546	2.91765	5.02145	3.82486	3.87429	3.0712	2.84954	2.79644	2.1589	2.06347	3.50314	2.45671	60.8778	62.0512	56.9878	59.4823	65.9258	78.2985	103.252	72.3478	126.663	69.9845	93.9363	79.008	8.28264	5.71025	5.75262	3.93486	0
Smp_029790	Chr_3	18841664	2520	Chr_3	Sjp_0106920	SJC_S004865	71	4.022	Aut_Shared	Aut_Shared	1.12759	1.65633	1.44851	1.49963	1.66225	1.84386	1.40314	0.77221	1.19449	3.67947	3.65567	4.38263	2.27645	2.14875	2.12561	1.36595	2.38988	0.984061	0.739042	3.17697	0.502231	4.34238	11.0951	12.8328	16.2851	12.5338	12.1217	14.0003	18.4217	46.6722	23.1603	44.102	15.8885	60.9654	0	0	3.05669	0	0
Smp_029820	Chr_3	18903591	445	Chr_3	Sjp_0100910	SJC_S003821	9626	0.38	n.a.	n.a.	1648.69	1532.61	1458.91	1715.69	1623.41	1143.4	3707.63	6962.17	4294.69	1150.75	1118.56	1337.65	2776.59	3459.3	4279.09	2430.6	443.712	1814.83	1908.42	547.776	1204	745.747	1379.25	1382.68	1273.57	1337.39	1254.42	957.563	3924.91	1097.66	13850.3	1124.53	5180.83	1443.43	129.816	2198.18	2644.05	537.41	524.714
Smp_029930	Chr_3	19202546	14990	Chr_3	Sjp_0122940	SJC_S015233	400	1.312	Aut_Shared	Aut_Shared	0.164604	0.976455	0.706439	0.641467	0.617661	1.44082	0.965619	0.102924	0.998661	1.59711	4.07514	2.08991	0.00481383	0	0	0	0.0286977	0.0183814	0	0.0281098	0.0562874	0.0446943	0	1.11237	1.52191	1.56178	1.0985	2.03527	1.64801	4.89736	0.501896	9.6011	2.63973	6.54882	0	0	0	0	0
Smp_029940	Chr_3	19221874	14062	Chr_3	Sjp_0097040	SJC_S003021	5138	7.923	Aut_Shared	Aut_Shared	4.33392	4.3981	4.66257	4.21351	5.31861	5.65277	4.37546	2.31792	2.93995	5.75225	6.05649	5.35595	4.72099	3.47082	2.38258	3.00737	3.49763	2.50809	2.45016	2.90659	2.76009	3.27154	44.3125	45.9507	49.6567	53.6459	50.8031	59.2699	49.0495	61.5708	42.8176	63.0764	38.2247	55.5162	0.520848	0	5.41175	4.46919	0
Smp_029970	Chr_3	19250008	7524	Chr_3	Sjp_0078460	SJC_S001343	19303	10.509	Aut_Shared	Aut_Shared	8.03506	6.72921	6.57687	6.46012	6.43887	6.18509	5.57832	2.74981	4.58539	5.9319	6.61391	5.65318	17.3493	21.2645	8.31184	7.27789	13.4359	8.05664	5.32181	9.6045	11.0459	9.46835	53.7984	42.2962	48.4332	43.4087	48.9192	45.0628	41.743	39.5706	37.7528	43.7537	35.4574	40.5993	2.20302	6.87907	10.2193	11.1571	5.41132
Smp_029990	Chr_3	19314025	42774	Chr_3	Sjp_0025500	SJC_S000149	438289	58.482	Aut_Shared	Aut_Shared	1.7873	1.41075	1.47843	1.81564	1.36143	1.48192	0.740479	0.143159	0.754275	1.25853	1.37134	1.16768	0.961584	0.89213	0.25285	0.421255	1.76668	0.869629	0.928856	1.94064	1.06519	1.5924	10.0163	10.3247	8.188	7.4335	8.70768	8.43605	4.93904	7.3682	2.21388	7.9833	5.62261	7.28696	9.59078	3.96929	5.29012	4.79096	3.45612
Smp_030010	Chr_3	19409005	15454	Chr_UP	Sjp_0025480	SJC_S000149	388745	11.521	n.a.	n.a.	4.14263	3.04682	2.86167	4.06643	3.62244	2.78935	1.8094	0.843902	1.47845	2.08022	1.85629	1.62065	6.1588	6.14356	2.3755	2.88649	20.2275	5.34885	4.13756	20.0267	9.28156	14.3641	38.6954	37.7152	27.6881	34.0102	27.1009	27.891	19.469	20.9245	17.1553	18.2474	19.4646	16.7522	0	0.040133	0	19.6346	0
Smp_030020	Chr_3	19427918	4378	Chr_3	Sjp_0025470	SJC_S000149	379967	4.771	Aut_Shared	Aut_Shared	13.8964	21.6427	20.6478	14.0238	18.8538	18.6832	13.8805	11.8592	12.4803	11.227	12.6352	11.248	6.1726	11.19	3.49129	4.34842	8.22101	5.09788	3.61587	6.78536	10.118	5.71314	47.2268	49.1358	75.9737	62.3468	75.8981	63.8724	50.7182	37.3655	78.2465	44.1647	49.8835	41.2101	13.3421	14.2151	24.3419	10.9427	34.1322
Smp_030150	Chr_3	19787998	28433	Chr_3	Sjp_0025370	SJC_S000149	169499	7.95	n.a.	n.a.	8.17661	7.05819	6.59536	6.05179	6.42181	5.74332	3.43343	2.02129	2.96659	4.87611	5.34658	5.4363	3.06575	2.73053	1.74952	1.69365	4.20601	1.41485	1.53927	3.78641	2.04757	4.06855	57.6948	40.0841	46.4097	43.6107	48.056	38.352	29.4268	37.7697	29.3643	39.5091	25.9743	44.5847	15.7423	16.046	16.659	27.3958	10.6243
Smp_030180	Chr_3	19849734	4866	Chr_3	Sjp_0070060	SJC_S000966	139196	2.257	Aut_Shared	Aut_Shared	17.2232	24.521	21.5887	21.441	31.0577	17.4597	58.9383	101.83	57.5364	19.3804	21.9122	25.8594	17.8767	18.6392	18.0196	13.1951	7.63229	10.8154	7.65468	7.49037	10.4038	4.68124	95.3975	100.347	125.744	136.28	106.968	89.227	324.329	94.1387	1043.47	107.359	340.504	136.043	8.82026	4.05535	3.78308	2.14816	4.7573
Smp_030220	Chr_3	19925265	4008	Chr_3	Sjp_0070070	SJC_S000966	144277	4.426	Aut_Shared	Aut_Shared	18.1512	21.1878	19.0862	12.8034	15.0137	16.4599	14.2859	8.72578	11.9729	15.4753	16.2475	12.8033	30.6155	27.5313	25.0778	29.6296	25.7234	21.6552	24.5499	29.2791	23.8936	29.6983	68.2845	50.4549	79.0388	47.1384	76.498	68.2439	63.9924	64.2456	76.504	68.1646	57.4184	59.1874	46.1608	51.2894	60.2554	68.5453	60.9431
Smp_030250	Chr_3	20016896	3997	Chr_3	Sjp_0096630	SJC_S002976	6509	2.961	Aut_Shared	Aut_Shared	20.203	26.3058	27.9034	20.5119	24.1524	19.9874	30.5725	33.0635	25.6159	20.3013	18.1921	16.0511	29.6165	26.8931	19.1034	23.9113	16.072	17.3029	23.142	21.2422	25.1204	18.0468	43.4288	43.8184	55.5757	50.9646	62.9874	42.2891	70.351	41.0946	140.383	37.1021	64.4517	34.681	7.99044	20.3519	14.8186	13.0268	8.97457
Smp_030260	Chr_3	20053358	2246	Chr_3	Sjp_0012100	SJC_S000050	222641	0.309	n.a.	n.a.	160.747	204.812	231.819	178.852	199.97	192	325.016	607.007	287.396	169.531	191.629	197.334	53.2038	62.4385	49.6883	42.756	11.428	13.2493	10.5032	30.3924	4.50801	23.8635	148.109	130.341	151.721	144.658	164.266	137.573	370.971	168.328	1364.38	203.008	385.9	226.844	12.1435	11.3384	9.45373	19.1307	4.08882
Smp_030280	Chr_3	20089305	14187	Chr_3	Sjp_0012110	SJC_S000050	243370	12.494	Aut_Shared	Aut_Shared	5.8078	5.6806	5.78631	5.29904	4.99429	6.02877	5.65075	5.71747	3.79862	4.41295	3.91558	4.4206	7.9626	8.02551	6.96934	5.66218	3.1737	5.74886	4.85714	3.71261	4.01445	2.97512	71.7537	66.804	71.9979	63.1347	79.069	74.9186	91.3378	60.3894	160.269	60.1068	65.4466	68.7167	4.12824	25.4471	27.6517	13.4906	0
Smp_030290	Chr_3	20109060	1735	Chr_3	Sjp_0012120	SJC_S000050	280304	7.037	Aut_Shared	Aut_Shared	21.7894	21.4095	21.4877	22.5042	20.7861	18.9075	40.9984	52.2145	39.2248	23.803	25.8326	27.0343	125.125	161.741	123.454	77.314	63.473	46.6905	42.0423	48.0867	64.9224	37.8426	316.373	306.849	321.63	295.147	319.763	265.871	744.878	386.623	1630.79	420.49	743.259	461.505	106.3	109.161	150.512	105.245	110.116
Smp_030300	Chr_3	20119047	79248	Chr_3	Sjp_0012130	SJC_S000050	293817	51.187	Aut_Shared	Aut_Shared	10.9569	13.9606	17.9907	9.90616	10.7853	14.0023	1.21726	0.174114	1.67804	11.9329	12.4951	9.61156	19.143	11.7344	13.1804	18.4756	31.6359	18.3893	14.637	19.1627	15.2837	23.4713	41.9245	37.8343	53.0043	40.1821	71.8408	53.8157	5.39612	49.0352	1.59535	51.8535	8.46543	42.4384	5.43778	3.02416	1.8567	2.95737	6.15447
Smp_030330	Chr_3	20239258	761	Chr_3	Sjp_0012160	SJC_S000050	378880	0.673	Aut_Shared	Aut_Shared	120.976	118.022	109.782	97.5411	105.36	93.3402	164.8	211.684	129.359	95.5465	98.9078	102.244	195.096	224.136	214.257	172.945	85.3573	58.6558	88.1023	87.2078	87.0358	85.9836	123.571	101.363	130.557	100.483	117.996	102.766	167.726	89.2531	406.9	96.8376	150.157	103.871	0	35.3432	14.3027	10.9981	0
Smp_030440	SC_0111	218938	875	Chr_newZ	Sjp_0056610	SJC_S000590	72735	0.176	n.a.	S1_mans	52.763	74.2461	81.2497	66.1488	54.1015	66.9226	69.365	46.035	52.112	49.1111	47.8458	46.738	23.3796	26.0079	41.9944	29.665	23.4345	9.76189	6.38532	28.4121	10.125	20.9285	0	0	0	0	0	0	127.599	110.595	287.131	129.33	119.224	149.861	0	25.2664	71.2756	163.466	0
Smp_030780	Chr_6	5420031	41470	Chr_6	Sjp_0112450	SJC_S007793	6188	3.563	Aut_Shared	Aut_Shared	22.9719	21.214	19.8071	20.9043	22.5166	20.3242	17.3259	8.2621	23.5351	23.6344	22.9965	24.6994	6.14581	4.38741	4.18022	5.88906	3.98332	3.84702	3.9071	4.17607	4.9339	4.20042	108.996	102.315	95.8224	99.7224	91.3409	97.4217	77.5315	94.7164	65.9487	85.0733	117.607	103.261	15.8245	21.9586	25.9417	21.4588	31.3909
Smp_030830	Chr_6	5566800	6808	Chr_6	Sjp_0036890	SJC_S000261	122245	6.341	Aut_Shared	Aut_Shared	42.7765	41.781	38.7344	49.4177	43.196	38.5946	64.5879	57.5197	69.2671	39.0555	37.0155	42.48	90.0295	75.221	95.1826	100.497	32.6467	53.4238	57.9032	36.1144	50.1316	47.6955	174.716	206.111	165.884	179.737	164.554	161.796	242.146	135.419	396.715	128.062	285.147	158.587	7.54644	69.9336	63.3756	49.7857	44.288
Smp_030870	Chr_6	5675117	3203	Chr_6	Sjp_0036930	SJC_S000261	224090	2.606	Aut_Shared	Aut_Shared	14.5023	18.1892	18.0878	10.1191	15.315	14.0613	8.83899	8.49805	7.15064	11.3072	11.0276	11.7242	9.85629	12.1309	6.18875	4.847	3.62623	3.78509	2.81034	6.90656	1.58055	7.5998	33.8391	23.2863	46.7273	34.7961	45.6632	31.9981	21.8262	23.287	34.5219	24.9347	20.1304	27.2619	0	9.31543	2.46038	43.0713	0
Smp_030910	Chr_6	5811058	4004	Chr_6	Sjp_0080450	SJC_S001522	422	1.27	Aut_Shared	Aut_Shared	9.18256	11.298	8.13207	7.28949	9.57132	10.0758	7.07356	5.84802	4.81454	12.4776	11.2615	11.9261	0.40549	0.456877	0.272671	0.236852	0.107437	0.137631	0	0.736654	0.105363	0.278874	18.0041	7.84667	42.9421	11.0168	15.4976	16.4077	49.8217	100.183	92.0498	67.7261	23.2758	88.6951	0	0	0	0	0
Smp_030920	Chr_6	5822257	796	Chr_6	Sjp_0106930	SJC_S004866	6549	0.533	Aut_Shared	Aut_Shared	396.67	400.918	399.208	476.067	443.196	389.038	714.153	912.823	602.543	469.059	466.948	490.188	383.278	386.919	413.145	383.014	166.091	145.73	161.828	177.598	182.847	145.609	233.467	283.939	248.663	264.538	252.332	242.665	517.518	305.627	1249.06	322.764	503.638	349.012	102.567	42.0658	36.6522	39.6099	38.4909
Smp_030930	Chr_6	5825806	5879	Chr_6	Sjp_0054660	SJC_S000553	46041	10.674	Aut_Shared	Aut_Shared	8.21434	8.73757	7.75288	9.54039	9.49002	8.21467	9.31173	6.7556	8.64712	10.3553	10.5689	10.2141	10.1875	10.6418	10.2139	9.81617	4.19519	1.68725	2.74548	4.44373	3.80325	3.19086	39.9893	48.7895	44.0855	46.4142	40.601	41.4758	49.2181	50.9904	66.3836	51.7155	48.783	52.6152	5.71124	0.542726	0.714274	2.44786	6.58838
Smp_031020	Chr_ZW	6643636	15267	Chr_Z	Sjp_0077790	SJC_S001317	1617	10.634	S1_mans	S1_mans	0.121851	0.168662	0.124513	0.118714	0.171463	0.0683712	3.60657	2.05716	2.72437	0.233994	0.125695	0.147342	0.0330854	0.0119823	0	0.00920268	0	0.0721916	0.284638	0	0.276331	0	1.05487	0.459742	1.258	1.12959	1.02152	0.48067	28.8017	1.72046	31.7373	1.04424	25.9112	1.29918	5.16596	0	4.33535	1.40905	0
Smp_031040	Chr_ZW	6725155	31994	Chr_Z	Sjp_0069070	SJC_S000934	1174	32.242	S1_mans	S1_mans	2.65245	2.34432	2.4065	2.88435	2.80245	2.38129	4.91165	2.95687	4.32115	2.70115	2.55373	2.5837	2.32983	1.96919	2.59665	3.32975	3.37932	3.34152	2.83291	3.58228	2.65039	3.7972	32.5386	34.7202	29.29	31.8043	30.8028	27.9072	55.9302	27.4202	61.0011	26.9456	55.03	29.0926	0.0034243	0	0	0	0
Smp_031050	Chr_ZW	6772892	20405	Chr_Z	Sjp_0085020	SJC_S001792	24030	21.697	S1_mans	S1_mans	8.90835	7.51058	7.87838	8.27498	7.33917	9.08113	5.8284	2.22809	6.38102	9.88696	9.31469	8.8222	2.53026	1.33401	2.21545	2.75073	9.59934	2.57915	2.12966	9.17899	4.23838	9.01827	89.4564	82.4874	73.1087	68.8138	80.1414	87.3579	63.2842	97.2345	43.5663	92.5133	71.922	94.9735	19.3957	19.7841	14.0664	55.9671	13.1191
Smp_031070	Chr_ZW	6808541	7591	Chr_Z	Sjp_0085030	SJC_S001792	52959	11.151	S1_mans	S1_mans	11.0004	8.82335	7.46874	10.1386	8.84788	6.78094	5.35011	1.78014	4.90889	6.04842	5.40604	4.26216	11.5687	14.546	13.4656	16.3013	16.9442	6.96919	5.15216	12.7392	6.50234	13.9742	30.4658	30.0615	26.5129	24.4171	21.7946	19.568	17.6675	17.7195	10.4623	16.0262	17.6871	13.5733	0	0	0	0.731374	0
Smp_031100	Chr_ZW	6927458	28814	Chr_Z	Sjp_0029170	SJC_S000184	404744	19.223	S1_mans	S1_mans	9.05498	8.46387	7.74893	6.9539	6.98742	6.21044	4.03219	1.85452	3.30956	5.98166	6.45273	5.27088	4.8471	4.08226	2.81692	4.25676	7.41498	2.92616	3.15633	5.59355	3.51391	6.08413	63.991	49.7745	58.4686	45.6467	59.4389	45.9038	33.8569	46.2598	27.9362	49.0389	30.6561	41.6279	25.5102	31.4013	34.764	45.0471	0
Smp_031220	Chr_ZW	7322993	1358	Chr_Z	Sjp_0029070	SJC_S000184	20055	1.205	S1_mans	S1_mans	36.7401	21.4759	17.0316	39.1119	28.9178	24.4968	31.2542	32.4983	24.2839	21.954	23.627	31.4234	2.09889	2.34392	3.86905	1.7588	9.39761	2.84059	3.88568	8.37768	6.52383	6.57798	28.1211	27.5759	16.6085	19.1741	11.4979	18.7632	37.1304	24.7438	66.516	27.9173	32.8236	36.6955	4.13164	2.63463	2.30622	1.12515	6.99191
Smp_031270	Chr_ZW	7432818	6469	Chr_Z	Sjp_0049770	SJC_S000460	335945	4.088	S1_mans	S1_mans	11.3052	13.2248	10.7208	9.88185	12.7364	11.1335	12.5934	10.6364	10.0783	7.65659	7.06251	7.47391	6.46411	4.61505	8.03769	8.0793	4.14507	1.70374	2.87894	4.36413	2.02166	7.35318	40.4234	39.7406	45.9997	50.1316	42.4322	44.2915	65.7507	38.5451	111.043	38.4888	61.2756	41.2345	2.11061	1.88366	2.17812	3.75593	0
Smp_031310	Chr_ZW	7605539	740	Chr_Z	Sjp_0049740	SJC_S000460	169082	0.643	S1_mans	S1_mans	781.219	697.338	643.295	846.84	863.304	612.178	1779.17	3754.13	2116.72	595.749	616.977	633.355	849.139	1045.54	2044.77	1535.03	440.254	569.692	783.963	612.974	474.893	771.67	1326.24	1401.11	1126.56	1412.18	1101.63	1001.11	2802.65	878.628	11196.3	927.464	3792.84	1003.98	346.212	1200.88	1176.4	704.983	474.264
Smp_031360	Chr_ZW	7684354	23612	Chr_Z	Sjp_0049720	SJC_S000460	47618	17.492	S1_mans	S1_mans	8.87694	8.11496	7.08511	9.42226	8.42014	7.46512	9.58011	5.70499	8.82218	7.25492	6.61751	7.17343	8.10157	7.00373	15.5895	18.0932	8.36842	5.71799	5.84986	10.5466	3.43045	11.1794	59.7716	62.9761	53.943	52.3648	48.5778	47.5371	66.2083	46.5445	69.4187	40.5517	67.3367	49.1637	15.1954	7.4274	0	9.38103	0
Smp_031530	Chr_1.unplaced.SC_0071	747946	6567	Chr_UP	Sjp_0014380	SJC_S000063	223177	1.634	n.a.	n.a.	3.43633	2.3521	2.512	3.43372	2.6037	2.58075	0.211454	0	0	1.52283	1.96325	2.47715	1.59328	0.818981	0.21301	0.411843	0.807908	0.0419579	0	0.93038	0	0.612122	1.50248	1.59613	1.00789	1.55145	1.15185	1.54042	0.155915	1.24327	0	1.39438	0	1.44567	0	0	0.856217	0.836075	0
Smp_031560	Chr_1.unplaced.SC_0071	660876	3462	Chr_UP	Sjp_0014360	SJC_S000063	125671	5.048	n.a.	n.a.	12.8344	15.6332	14.6886	14.4213	16.3744	18.2917	22.1765	23.9684	15.6599	23.0119	22.4275	24.9345	8.47278	9.50072	4.86837	4.50468	6.37853	4.3774	3.676	5.35532	4.26505	6.12815	60.9251	77.0032	75.5636	83.5083	78.4027	94.6671	143.868	143.322	287.053	137.751	111.531	151.321	62.0628	16.6924	8.89431	47.3384	54.3914
Smp_031570	Chr_1.unplaced.SC_0071	634271	3408	Chr_UP	Sjp_0014350	SJC_S000063	117154	2.471	n.a.	n.a.	237.285	207.798	180.15	212.814	201.527	148.884	428.9	727.533	425.966	144.584	139.615	145.154	275.171	280.649	301.906	245.726	82.5939	167.117	151.647	58.5437	149.042	81.1903	753.621	691.873	656.489	625.856	595.739	474.822	1466.34	448.778	4595.12	439.587	1616.85	479.876	125.669	520.67	527.19	167.267	216.32
Smp_031590	Chr_1.unplaced.SC_0071	568591	1099	Chr_UP	Sjp_0014330	SJC_S000063	62887	0.322	n.a.	n.a.	197.852	211.662	247.954	211.708	235.31	247.923	379.138	540.144	352.201	266.4	293.481	313.043	168.612	187.761	114.213	88.9454	122.647	125.107	131.898	167.55	107.868	186.746	183.87	274.751	204.659	218.594	281.499	292.046	489.432	323.576	1252.06	340.113	497.152	373.111	33.0379	166.422	171.107	198.353	18.715
Smp_031690	Chr_7	8979648	7666	Chr_7	Sjp_0069050	SJC_S000933	55502	9.16	Aut_Shared	Aut_Shared	9.19481	9.17476	10.263	9.67784	10.572	10.382	9.64377	4.76164	8.20094	10.3655	9.64545	10.2489	10.4201	8.34727	5.48754	6.4054	6.84604	3.9537	4.21097	4.80949	5.94344	5.85544	43.9346	45.9377	44.8199	46.5205	50.1489	49.1143	49.4369	47.5337	45.5913	44.802	45.2682	51.0132	6.91329	10.2795	18.3022	11.2844	5.83762
Smp_031710	Chr_7	9126881	17850	Chr_7	Sjp_0058220	SJC_S000631	29982	3.012	Aut_Shared	Aut_Shared	50.9787	55.2085	53.7628	51.1799	50.1101	46.7809	45.7706	25.734	33.0123	41.9586	41.0491	41.009	9.8557	8.71113	6.94784	7.30429	6.87642	6.49866	5.68627	5.77165	7.11396	4.70416	127.126	128.786	138.579	121.178	137.879	117.013	114.344	94.1018	118.659	96.4252	92.0358	102.755	24.0638	33.5897	39.276	25.2498	17.4158
Smp_031730	Chr_7	9166902	4902	Chr_7	Sjp_0058200	SJC_S000631	12360	3.878	Aut_Shared	Aut_Shared	27.5101	24.9086	25.5732	35.2658	26.1208	25.7227	59.5758	118.74	67.3479	29.7183	29.8832	33.1643	20.7263	17.129	25.3414	26.1247	11.9055	31.7582	28.051	14.4839	26.507	13.895	157.4	219.006	138.962	153.959	163.495	157.04	415.023	185.268	1496.22	192.001	518.988	226.838	20.2285	160.933	141.968	33.1849	57.5117
Smp_031860	Chr_7	9715002	9015	Chr_7	Sjp_0054900	SJC_S000557	81625	11.871	n.a.	n.a.	21.4487	19.6197	20.6122	23.1002	22.5615	22.5143	28.4947	25.1053	31.1866	21.5789	22.2605	24.1099	19.7387	21.4813	19.5776	21.172	13.7428	16.1074	18.2485	14.8635	14.5538	15.9286	104.673	110.21	93.8739	105.967	104.177	111.64	144.647	100.711	230.746	102.802	173.799	119.509	40.6575	101.639	88.1279	76.2314	43.1275
Smp_031880	SC_0148	12269	11704	Chr_UP	Sjp_0054870	SJC_S000557	6818	14.595	n.a.	n.a.	32.4495	35.9887	41.3686	33.0222	35.341	44.3957	26.5539	17.2924	22.8922	50.5636	49.2256	49.9108	71.0125	63.5048	64.8633	65.429	58.1216	24.9076	21.2695	66.7115	27.1782	70.4084	327.921	328.802	349.107	343.445	424.902	443.508	328.675	552.718	387.322	551.636	326.96	592.822	63.2873	55.4294	44.9658	121.862	34.2309
Smp_031990	SC_0125	167507	4932	Chr_UP	Sjp_0031480	SJC_S000201	137579	5.083	n.a.	n.a.	22.433	26.1111	21.6467	21.2485	21.443	21.6845	14.7959	10.3608	16.9842	15.0725	13.6215	13.075	13.336	14.0427	8.58484	9.06595	3.54702	3.5755	5.47538	1.58055	4.53352	2.71682	41.2721	39.7259	46.9516	39.4532	42.4228	39.8444	30.6315	28.7392	38.7094	26.3212	38.2105	26.0595	0	4.35466	4.56235	0.557276	0
Smp_032060	SC_0125	299324	6926	Chr_UP	Sjp_0071370	SJC_S001007	22745	8.777	n.a.	n.a.	11.1216	10.1006	10.8918	11.4745	12.072	9.72506	19.6174	26.4164	15.7741	12.31	12.4877	12.8234	28.6512	34.1673	24.1181	21.5178	18.1156	14.8391	13.4449	18.0081	18.6999	17.3151	219.03	231.854	203.575	234.665	225.943	193.394	358.489	202.807	873.677	222.224	324.681	233.757	85.4658	76.4949	61.0365	98.5459	49.73
Smp_032230	SC_0125	729982	7847	Chr_UP	Sjp_0027450	SJC_S000167	78248	2.78	n.a.	n.a.	17.4788	17.2351	21.147	14.9854	15.741	19.8241	37.0373	50.7114	33.9867	30.9977	32.3103	39.1709	13.4258	13.4234	10.735	9.90124	11.4941	9.02422	9.45393	12.1088	10.4299	11.5831	63.2746	61.3698	61.2334	70.9304	90.7389	76.5708	152.42	117.032	380.619	118.6	154.888	156.497	35.7353	5.61462	6.04179	6.82458	10.2858
Smp_032240	SC_0125	775072	2683	Chr_UP	Sjp_0027420	SJC_S000167	42083	1.29	n.a.	n.a.	51.5626	65.3465	63.74	63.2834	60.9349	61.8846	83.9238	86.4649	75.1613	88.8315	85.4832	95.5487	29.7459	39.0549	17.8919	14.6624	20.7366	21.3611	20.7086	29.2114	17.9253	27.9673	87.2543	115.679	116.427	109.77	126.448	113.438	191.137	185.453	370.756	180.844	194.053	220.561	18.5262	36.4432	41.4105	29.0319	7.84987
Smp_032250	SC_0125	781700	11729	Chr_UP	Sjp_0027430	SJC_S000167	51070	5.882	n.a.	n.a.	12.52	12.4583	10.6475	9.32414	11.1939	10.2842	10.0448	5.85416	9.85071	12.1567	12.8393	11.6763	9.06528	12.2715	7.12961	7.86097	4.70681	4.51046	4.73707	5.15526	5.89883	4.98853	40.6761	30.0567	39.3952	33.3752	34.8542	32.4359	30.8349	34.2706	30.2496	36.4593	34.0378	35.2195	15.7553	3.65721	6.75247	5.84902	16.4611
Smp_032260	SC_0125	826280	792	Chr_UP	Sjp_0027400	SJC_S000167	1639	0.435	n.a.	n.a.	777.457	734.503	723.824	911.577	783.359	609.059	1575.08	2707.55	1815.26	514.82	518.066	630.337	1390.62	1427.99	2243.17	1717.19	349.972	1114.33	1183.59	502.766	968.926	616.675	654.31	770.383	619.494	647.513	636.837	519.867	1642.63	486.77	5165.69	512.519	2115.69	647.132	146.843	671.978	585.821	210.108	419.312
Smp_032280	Chr_ZW	51684218	10063	Chr_PSA	Sjp_0090930	SJC_S002342	25052	18.328	PSA_shared	PSA_shared	21.8105	18.5372	15.0627	17.411	19.7641	12.956	4.27308	1.00201	4.194	6.6096	6.20627	3.45517	16.3135	6.05355	4.51268	11.5359	6.62602	7.1465	8.35911	12.9387	4.19233	12.5831	64.0925	49.9998	53.574	56.4677	46.5086	38.3747	14.1672	19.9385	6.25188	18.8142	15.5947	11.0847	10.4804	6.66471	9.81018	14.5644	6.59425
Smp_032310	Chr_ZW	51546426	14474	Chr_PSA	Sjp_0003110	SJC_S000007	673477	6.147	n.a.	n.a.	18.6203	20.216	20.2261	16.0645	15.7539	17.9311	32.114	43.4962	31.4754	21.4543	24.2236	26.8914	8.31572	9.08223	7.2743	6.176	8.90632	5.78716	5.03962	10.9315	5.24647	7.20545	274.345	259.907	256.472	245.409	309.198	277.3	583.54	371.387	1484.03	410.133	633.007	497.518	8.77074	44.9507	56.8915	96.223	0
Smp_032320	Chr_ZW	51542552	1594	Chr_PSA	Sjp_0003120	SJC_S000007	684317	1.465	n.a.	n.a.	197.239	213.023	207.784	138.735	217.528	181.145	227.828	365.196	191.593	170.118	175.634	176.113	266.433	256.956	313.676	316.516	95.985	168.019	163.183	142.614	146.094	171.765	277.463	218.154	332.376	364.469	332.377	298.804	396.887	261.486	1208.66	287.524	385.379	297.716	0	18.746	30.4805	35.0179	14.7673
Smp_032420	Chr_ZW	51314169	3843	Chr_PSA	Sjp_0096100	SJC_S002870	17677	5.039	PSA_shared	PSA_shared	11.4859	11.6441	11.7456	10.1046	11.9811	11.5718	11.3138	11.2016	10.2564	8.91453	8.48832	8.36953	28.1183	30.0082	35.8137	29.0555	9.88787	12.9774	8.88465	10.5808	6.80619	9.82085	38.7575	36.1963	40.47	39.6724	44.9692	41.0181	44.9765	30.124	77.7594	29.9157	44.4721	31.8958	6.00292	11.471	13.3693	8.15966	5.06189
Smp_032480	Chr_ZW	51023069	26729	Chr_PSA	Sjp_0051510	SJC_S000486	116370	33.098	PSA_shared	PSA_shared	7.03381	6.18531	5.27659	4.94568	5.00698	4.3143	4.22439	1.95427	3.47484	3.0428	2.93191	2.1066	6.28211	5.08647	3.17706	5.28921	3.66945	4.56669	5.21413	3.84651	6.55011	3.41722	35.8949	26.1677	31.7973	25.4517	28.8106	23.4636	22.5591	14.8109	19.3469	14.3321	20.5011	10.9802	3.94477	14.0017	13.6661	14.1659	3.30614
Smp_032490	Chr_ZW	50984813	37235	Chr_PSA	Sjp_0051520	SJC_S000486	160062	4.694	n.a.	n.a.	2.62244	2.01964	2.25661	2.68941	3.97072	2.19946	2.82164	1.35209	2.38813	1.92511	2.02177	1.55771	1.66275	1.14668	0.678054	0.925392	0.546845	0.747395	0.45849	0.435681	1.03103	0.419836	14.5654	17.5082	10.6463	23.288	18.1998	13.4881	26.7841	14.3346	19.9569	14.5117	24.4187	13.0201	40.3959	3.34748	4.7395	6.73525	30.7475
Smp_032510	Chr_ZW	50911694	22960	Chr_PSA	Sjp_0051530	SJC_S000486	165219	8.284	PSA_shared	PSA_shared	28.6765	28.3007	27.012	32.5778	31.5726	28.6471	30.1138	22.8538	33.1972	28.7568	32.0285	34.4708	13.9903	8.6782	11.075	16.6795	10.03	18.2171	17.2773	11.5527	14.6994	12.8196	78.4341	92.3267	77.8556	87.9897	77.4109	82.5422	90.5653	77.4888	122.378	86.2864	107.497	99.2827	24.3854	58.1467	49.0235	28.0982	22.4972
Smp_032640	Chr_2	615795	1174	Chr_2	Sjp_0020260	SJC_S000109	121075	1.18	Aut_Shared	Aut_Shared	13.7263	12.3768	10.211	9.39079	11.5032	9.73521	12.298	8.23949	9.74663	10.2107	9.06201	8.96284	15.4276	21.5656	9.70648	9.72351	10.1376	4.92869	6.34543	10.7674	2.87478	13.6961	29.3147	23.5446	29.9655	19.9879	24.3324	21.7541	27.3494	25.553	31.6226	15.9192	22.0893	18.052	11.2976	4.8386	12.8196	12.4446	0
Smp_032740	Chr_2	921807	17011	Chr_2	Sjp_0095470	SJC_S002767	6212	0.497	Aut_Shared	Aut_Shared	0.434528	0.515537	0.799236	0	0.407632	0.877738	0.231734	0.271702	0	0.790521	1.07577	0	0.00212096	0.00215077	0	0.010324	0	0	0	0	0	0.0131281	0	0	1.07568	0	1.16463	1.54128	0.499206	0.778828	0	1.8751	0	0	0	0	0	0	0
Smp_032760	Chr_2	940618	559	Chr_2	Sjp_0059680	SJC_S000663	47249	0.505	Aut_Shared	Aut_Shared	1217.5	1179.13	1129.26	1488.78	1418.95	1109.74	2468.33	3383.12	2828.92	1003.1	1019.56	1085.93	1160.74	1487.49	1461.83	1085.84	289.864	802.459	785.711	324.882	614.321	361.95	1276.04	1518.68	1207.44	1403.93	1217.7	1125.45	2511.25	920.252	6373.25	949.868	3217.51	1080.19	216.723	1241.82	1284.33	367.994	126.197
Smp_032770	Chr_2	946894	5097	Chr_2	Sjp_0059670	SJC_S000663	41294	3.648	Aut_Shared	Aut_Shared	21.3711	24.7232	20.7612	19.8789	23.8247	23.8367	21.942	15.1027	19.9139	21.7195	19.3462	17.5739	15.4243	17.8663	8.68848	8.73801	8.21477	8.81157	6.4552	9.75499	8.19414	10.2526	46.5362	42.0696	52.2007	52.1587	45.7093	51.333	48.8759	45.5307	62.6982	40.8677	48.8448	38.493	3.11134	9.91019	5.19828	14.3816	0
Smp_032780	Chr_2	999296	12122	Chr_2	Sjp_0059720	SJC_S000663	127618	5.031	Aut_Shared	Aut_Shared	20.0893	18.3343	18.8965	17.1466	16.8324	17.0529	24.0142	20.7748	22.571	15.3844	16.3129	17.6481	12.0692	10.4762	11.2976	11.2802	2.76802	8.63753	7.34896	2.57227	5.67278	2.81871	81.3336	68.2005	73.4956	67.56	76.3297	69.4565	84.4682	48.3755	126.734	53.4721	83.4697	59.8404	16.0505	30.7012	43.6642	5.4627	33.9402
Smp_032920	Chr_ZW	15202318	4591	Chr_Z	Sjp_0083740	SJC_S001721	45716	0.25	S0	S0	50.1028	42.0204	33.8962	81.9162	91.572	61.6547	67.7212	152.321	81.5263	57.6237	47.5846	53.7947	12.6291	17.0781	24.9773	15.8599	10.6818	5.7016	6.761	15.0062	8.82159	10.3611	6.44326	8.42445	7.68402	5.91401	16.6387	8.80796	89.1505	100.142	463.73	61.2321	189.922	115.065	0	0	1.14069	0.581751	2.92444
Smp_032930	Chr_ZW	15207630	20498	Chr_Z	Sjp_0118330	SJC_S010106	921	5.721	S0	S0	6.11529	6.62836	6.50346	10.9841	12.713	10.4973	4.288	1.51063	3.58804	8.01207	7.92035	6.34476	2.77752	2.0205	3.45374	4.47065	3.71458	2.29861	1.72628	3.99823	2.77847	4.4451	20.4679	37.6825	23.6915	42.132	21.6668	35.6947	18.1581	31.5344	13.14	32.091	17.6278	27.3399	29.2031	6.31268	5.60875	10.5235	0
Smp_032950	Chr_ZW	15262895	403	Chr_Z	Sjp_0102250	SJC_S004003	32799	0.264	S1_mans	S1_mans	736.228	791.959	1307.52	987.716	965.386	1674.44	1324.91	1848.56	1380.83	1891.52	1881.94	2523.36	757.493	1139.45	1864.98	1265.61	309.913	159.306	206.418	689.033	118.292	417.829	804.443	1208.83	966.016	974.234	1648.18	1947.34	2866.1	3659.51	6920.74	3603.43	2994.31	4840.23	83.9632	104.045	99.4855	237.156	0
Smp_033000	Chr_ZW	15333249	414	Chr_Z	Sjp_0114010	SJC_S008126	268	0.3	S0	S0	41.0324	138.36	383.98	64.0555	106.699	283.069	50.6757	73.3696	85.4085	171.998	114.952	136.228	13.2466	15.4654	9.14758	7.29636	3.46359	0	0	0.508896	1.01902	0.539426	12.8865	54.7589	53.7882	82.7962	320.296	233.411	128.377	274.464	319.29	168.388	229.905	301.549	0	0	0	7.81805	0
Smp_033020	Chr_ZW	15369612	10280	Chr_Z	Sjp_0115610	SJC_S008546	12110	6.916	S0	S0	8.46229	9.33602	8.28979	16.0225	15.0568	13.7296	11.3573	10.2702	10.5461	14.6566	15.6741	16.2929	15.2566	12.2608	21.0715	22.0415	5.9282	5.30704	5.284	6.06636	6.81237	6.4303	54.2551	106.751	62.5042	100.806	60.0209	93.2486	79.4416	95.8161	132.377	102.463	80.0839	112.881	6.29425	48.266	31.7735	29.2361	10.7223
Smp_033050	Chr_ZW	15422359	6456	Chr_Z	Sjp_0092890	SJC_S002527	4636	2.894	S0	S0	47.0128	47.5436	42.7325	61.5063	69.3744	57.6322	40.3142	15.258	34.6601	60.8204	54.5928	48.05	22.3374	17.2336	24.4153	35.5106	38.9799	20.5714	21.1547	37.5614	30.3859	34.7644	50.319	66.9745	52.9934	72.6014	48.5526	63.7757	49.3869	68.7668	34.5965	62.4083	48.2982	57.6257	10.5418	17.2834	14.0668	19.504	8.87937
Smp_033150	Chr_7	5923485	17625	Chr_7	Sjp_0027570	SJC_S000168	351288	12.671	n.a.	n.a.	1.12488	1.09194	0.77327	1.2177	0.799436	0.791842	0.272683	0.0959139	0.0689366	0.558125	0.580187	0.432794	0.388944	0.352893	0.131633	0.161422	0.707811	1.5946	1.2504	0.609636	1.57978	0.430807	10.089	12.8694	12.0318	8.80854	8.57849	6.89582	4.08566	6.37417	2.03231	6.2847	1.527	6.36431	0	6.32647	9.70132	1.35151	16.8183
Smp_033200	Chr_7	6156658	4830	Chr_7	Sjp_0014210	SJC_S000062	270224	6.661	Aut_Shared	Aut_Shared	2.01014	3.11574	2.74315	2.23215	3.80185	3.53652	0.155615	0	0.371552	1.39594	1.48494	0.64687	0.463134	0.295421	0.247232	0.181803	0.771886	0	0	0.872393	0	0.554839	4.15791	4.23598	5.34912	6.36752	5.37937	6.21544	0.705975	3.00979	0.157299	3.13261	1.23881	1.81697	0	3.2326	0	0	0
Smp_033260	SC_0199	405590	35591	Chr_UP	Sjp_0033730	SJC_S000227	286881	22.481	n.a.	n.a.	2.82427	2.82652	2.44423	2.60806	2.55933	2.50967	3.12508	1.74194	2.29244	2.23116	2.15233	2.09088	2.36706	2.19782	1.44271	1.66488	2.74368	2.36898	2.07565	2.06001	3.8405	2.18359	26.3182	24.1104	24.7731	22.4598	23.4687	21.7186	28.6444	18.1391	27.6246	18.5072	23.5553	19.0253	60.0693	2.34502	2.61172	13.4204	19.9213
Smp_033330	SC_0199	222000	4933	Chr_UP	Sjp_0033350	SJC_S000223	51090	1.494	n.a.	n.a.	8.6731	11.4905	10.7237	7.13542	11.2552	11.3877	9.25077	10.304	7.69814	15.6034	15.6568	16.5179	16.2442	11.6665	8.50011	7.8323	22.5568	5.47388	5.34843	16.6138	6.5851	13.9435	52.8154	50.222	51.534	70.5123	57.3449	59.0718	85.0347	132.665	138.792	124.054	61.4523	124.181	53.4396	35.5854	9.37493	38.3509	11.3929
Smp_033400	Chr_7	4058304	1917	Chr_7	Sjp_0038590	SJC_S000283	15657	1.001	Aut_Shared	Aut_Shared	184.03	231.393	254.364	213.974	247.119	252.328	333.55	629.853	291.747	231.704	223.665	232.182	192.538	213.642	234.27	165.141	74.277	75.7476	79.6638	100.451	78.1248	89.5853	533.864	586.74	615.578	645.234	784.216	719.972	1229.58	829.041	4311.38	752.352	1199.46	837.877	63.9772	134.483	167.531	151.875	22.2309
Smp_033590	Chr_2.unplaced.SC_0108	183420	1442	Chr_UP	Sjp_0043690	SJC_S000359	25280	0.797	n.a.	n.a.	35.2256	35.6846	29.7375	37.8388	39.4001	25.7253	37.4273	17.6208	35.802	27.1128	18.4481	18.6762	18.7904	18.4456	11.3569	10.4983	16.3082	14.7132	12.0543	13.5877	16.9686	16.2614	27.28	29.8242	24.0834	31.1689	24.1215	20.9886	41.9447	25.5469	32.6258	18.4519	44.7526	20.8123	9.35819	9.95109	11.7675	7.65183	0
Smp_033610	Chr_2.unplaced.SC_0108	257938	13383	Chr_UP	Sjp_0104810	SJC_S004309	14747	2.996	n.a.	n.a.	38.5643	54.306	53.7848	46.8651	49.972	45.1379	68.5035	103.891	52.9171	49.1767	49.9681	52.2105	10.1879	11.4438	10.4141	8.59015	7.38232	6.77365	8.72072	9.74466	7.37641	9.86204	269.695	339.481	388.553	321.344	389.318	322.304	574.8	375.098	1630.54	385.543	507.404	428.605	121.807	92.5518	122.051	143.806	104.172
Smp_033620	Chr_2.unplaced.SC_0108	275048	864	Chr_UP	Sjp_0104800	SJC_S004309	10074	0.641	n.a.	n.a.	79.1742	77.9458	73.5364	78.7773	79.0144	85.75	81.932	115.023	71.9964	62.9276	76.9458	75.1642	188.917	215.371	154.005	135.619	96.259	82.5974	71.1327	77.5431	90.3319	66.9451	46.877	49.3511	45.3767	42.1884	45.1983	52.8461	72.2728	51.3399	195.016	60.3864	73.9043	60.7328	48.7738	25.2475	27.3982	30.4919	71.3648
Smp_033660	Chr_2.unplaced.SC_0108	407867	3180	Chr_UP	Sjp_0064410	SJC_S000791	174204	4.162	n.a.	n.a.	44.7279	40.6311	37.0943	40.7793	39.3796	37.8728	39.8481	34.7161	35.4687	34.4557	39.8874	36.0463	27.5022	25.139	16.662	19.6056	11.9043	11.3507	11.6155	16.5631	19.3691	12.9218	80.1452	74.1685	74.201	68.2546	70.4809	68.0593	83.7843	66.1062	135.905	78.5135	80.1091	74.493	12.3339	16.6036	17.2108	13.435	27.8283
Smp_033670	Chr_2.unplaced.SC_0108	416800	1112	Chr_UP	Sjp_0064400	SJC_S000791	171408	1.008	n.a.	n.a.	328.868	361.964	391.572	369.176	382.475	355.163	458.403	687.505	388.365	303.501	267.064	311.269	356.059	324.378	318.782	297.641	188.783	199.219	187.578	192.684	209.799	191.792	268.667	296.315	282.162	293.013	315.445	277.489	409.107	250.145	1134.08	219.402	385.391	269.117	0	7.29211	18.3328	4.21871	0
Smp_033680	Chr_2.unplaced.SC_0108	427706	14740	Chr_UP	Sjp_0064380	SJC_S000791	132808	3.986	n.a.	n.a.	17.7168	18.3199	17.5723	17.7358	17.6875	17.912	20.7749	18.9037	17.0565	16.0007	15.5931	16.3458	5.03499	4.86748	4.14555	4.52994	6.54704	4.18727	3.45354	5.117	5.35214	5.53004	53.7362	60.7146	57.0712	51.9281	55.899	58.2117	73.6213	50.8928	117.711	51.7897	65.9055	58.8141	29.917	38.1864	23.7025	57.1048	25.3802
Smp_033760	Chr_2.unplaced.SC_0108	689387	14810	Chr_UP	Sjp_0051160	SJC_S000482	226266	15.012	n.a.	n.a.	17.2774	13.9615	12.9302	18.052	14.6425	12.7957	15.0831	14.5093	13.9163	9.52648	9.74081	9.88928	23.8014	16.2009	24.8433	36.5189	9.5466	15.2187	17.752	11.6224	13.4738	12.38	80.9374	87.4016	66.6982	67.0786	64.3496	60.3948	72.9162	42.1928	128.914	42.9362	74.9135	45.8912	0	12.5522	3.31033	0	0
Smp_033770	Chr_2.unplaced.SC_0108	706643	6646	Chr_UP	Sjp_0051130	SJC_S000482	182841	14.383	n.a.	n.a.	4.8198	4.23978	3.48899	4.93467	4.71867	4.1451	2.57041	0.619647	2.63168	3.96085	3.8474	3.57676	12.6165	11.4671	7.10492	8.37149	8.26353	7.08951	6.21169	6.30844	7.29996	7.69498	14.1919	14.9096	12.8866	14.2145	11.2517	12.5592	9.28758	13.157	4.28892	13.3686	11.0084	12.9097	7.51041	6.76976	7.29965	7.1339	6.31151
Smp_033870	Chr_2.unplaced.SC_0108	998538	5371	Chr_UP	Sjp_0067070	SJC_S000849	50174	4.793	n.a.	n.a.	14.7338	17.0529	16.8237	14.574	15.9352	24.4224	14.778	7.0434	9.3552	19.5092	22.6446	18.7151	12.199	9.23013	5.3232	7.70368	23.4672	7.02823	5.49018	19.8876	8.32595	17.9623	54.0683	58.0192	68.8473	58.9199	67.5865	93.9353	55.6755	70.4312	46.0021	85.595	39.9349	73.7535	19.1817	15.2995	10.7229	33.9884	0
Smp_033990	Chr_1	23606188	2296	Chr_1	Sjp_0060980	SJC_S000694	118312	1.462	Aut_Shared	Aut_Shared	51.5528	59.937	63.2148	65.1447	61.6647	63.4561	81.1403	116.101	72.5922	63.8691	67.1066	72.5189	72.6621	73.4603	79.1876	60.2743	18.1739	16.9211	14.4654	20.3709	22.2329	19.2587	80.0657	106.888	94.4788	101.724	118.069	108.874	169.553	116.192	440.014	128.65	158.533	139.609	2.33049	3.95595	11.013	9.49367	0
Smp_034000	Chr_1	23631411	31376	Chr_UP	Sjp_0071510	SJC_S001012	51821	10.324	n.a.	n.a.	10.3545	10.374	8.6185	7.7715	9.00718	8.1833	5.76753	2.31513	4.96369	6.83737	6.8619	6.63978	4.74454	3.11342	2.3977	3.63602	3.551	3.98693	4.78813	4.03558	4.71946	4.10687	54.0928	44.1615	57.1718	47.179	50.2309	45.0329	29.7958	34.7533	22.2318	32.5094	29.8287	34.6522	6.70083	25.852	20.4444	18.1706	13.4928
Smp_034080	Chr_1	23796042	12102	Chr_1	Sjp_0061030	SJC_S000694	174866	2.426	Aut_Shared	Aut_Shared	4.27291	4.01337	5.78529	3.81601	4.76002	3.47646	2.5636	0.55662	4.02063	2.42924	2.47935	2.79869	1.32071	1.18812	0.259367	0.243798	0.722769	1.43438	0.384727	0.66154	0.836637	0.369067	1.94653	1.84297	2.16128	2.52594	3.1633	1.78923	1.93172	1.62278	0.871136	1.67443	2.96773	1.86001	0.450954	0.286531	0.374499	0.244239	0
Smp_034090	Chr_1	23827208	7716	Chr_1	Sjp_0060990	SJC_S000694	128524	10.715	Aut_Shared	Aut_Shared	4.93796	6.12159	6.43807	5.43266	6.57978	5.95762	4.60043	2.35667	3.72279	4.71784	4.47836	3.81412	8.41204	10.4222	3.01561	4.12424	6.05832	4.78512	2.69526	5.8159	3.44454	4.25459	12.2694	14.0746	15.3223	16.9455	16.9254	15.546	13.581	12.7595	12.0179	12.4437	12.0761	10.9056	0	6.38645	5.9018	3.84547	2.97643
Smp_034100	Chr_1	23848849	2801	Chr_1	Sjp_0061000	SJC_S000694	153942	0.347	Aut_Shared	Aut_Shared	92.1098	110.759	104.933	126.524	106.259	81.2966	321.287	447.915	346.545	82.6539	80.5069	97.8333	26.5348	29.4287	17.6498	19.9886	15.358	7.08271	8.97615	9.85344	11.748	10.6838	65.1612	79.8724	59.3612	69.7771	58.4267	48.2493	263.965	58.8686	695.133	62.8921	332.05	77.4659	3.775	4.00324	0.524163	0.512257	3.17248
Smp_034160	Chr_2	6266984	6646	Chr_2	Sjp_0100920	SJC_S003822	9159	4.056	Aut_Shared	Aut_Shared	1.81032	1.01074	1.43637	1.24498	1.29867	1.25479	0.283955	0.133172	0.107679	0.936372	1.05455	0.611643	0.114004	0.0825762	0.0770042	0.190261	0.0431516	0.0414591	0	0.0317007	0	0.100808	7.11284	5.42495	4.59471	4.89645	6.50527	5.26677	1.64025	4.43561	1.39869	5.45691	0.689666	3.46756	0	0	0	0	0
Smp_034270	Chr_2	6840411	18398	Chr_2	Sjp_0038730	SJC_S000285	120859	11.225	Aut_Shared	Aut_Shared	9.69657	6.93911	6.57021	8.04741	7.02082	6.11443	6.19723	2.94733	3.68334	4.01348	3.85811	3.19881	2.62586	2.69857	0.932784	1.54067	2.50965	1.30295	1.51841	2.10706	3.00389	2.06353	27.4808	22.713	20.3011	19.2509	19.0915	16.7182	18.9713	10.9696	16.3145	10.7665	12.6637	9.40942	0	0	0	0	11.6695
Smp_034300	Chr_2	7007612	1895	Chr_2	Sjp_0110790	SJC_S007220	21	2.729	Aut_Shared	Aut_Shared	4.19417	3.19221	4.85184	2.77554	5.27083	4.95541	2.99641	0.79171	4.05434	3.69518	3.72243	2.72718	1.29468	1.19703	0.198046	0.370705	2.72408	1.89023	2.12938	3.33535	2.22625	4.47824	11.1984	6.40576	8.34679	11.7775	11.5974	9.72713	8.00544	9.13214	3.5784	8.7299	9.59129	6.89598	0	0	2.94629	2.86202	0
Smp_034420	Chr_2	7321076	1132	Chr_2	Sjp_0005780	SJC_S000018	236901	0.552	Aut_Shared	Aut_Shared	262.126	276.645	329.818	263.764	310.496	460.471	270.613	310.681	308.044	606.416	628.369	725.467	262.661	131.738	228.006	236.5	441.199	79.8376	84.4544	354.923	149.445	286.65	273.08	286.597	255.016	302.955	328.554	491.308	303.209	607.994	617.765	619.634	347.498	747.004	0	19.5481	13.8581	43.0584	0
Smp_034430	Chr_1	19692460	3538	Chr_1	Sjp_0080840	SJC_S001560	55617	1.794	Aut_Shared	Aut_Shared	13.1213	11.5685	14.6873	15.6374	14.116	12.7256	19.7089	24.0114	19.1513	14.8921	15.8699	17.1036	43.575	38.262	35.5356	34.7173	14.1042	16.1989	14.2127	16.2568	14.1897	18.4314	39.1493	47.7746	33.2005	38.3292	44.3704	36.2728	77.0388	48.0763	146.784	47.0226	72.8821	58.9309	11.3466	16.3705	11.3532	16.6385	7.63733
Smp_034440	Chr_1	19685382	2865	Chr_1	Sjp_0080850	SJC_S001560	61368	1.337	Aut_Shared	Aut_Shared	5.16883	5.55754	5.84293	4.40631	4.69737	4.45916	3.53183	0.807994	3.59329	3.72221	3.99894	3.22274	9.84792	4.30357	2.83424	3.70246	3.30329	1.05791	0.325024	1.83842	2.50327	2.49435	3.19656	3.01849	3.10617	2.608	3.82159	2.7513	2.35885	2.24896	1.11748	2.6018	3.03054	2.26006	3.08644	1.96613	1.7188	3.35671	15.6197
Smp_034450	Chr_1	19767305	4190	Chr_1	Sjp_0080870	SJC_S001560	146418	5.476	Aut_Shared	Aut_Shared	14.4342	19.605	18.0379	16.4704	18.5353	15.5874	14.4281	13.7107	12.5218	12.0297	9.66603	10.4437	19.4865	18.7736	14.3475	19.4735	14.9553	17.1635	12.4455	14.8333	12.0823	14.6039	29.8577	33.5527	41.7746	38.5106	40.1893	32.5458	34.7776	25.6123	60.44	21.1535	31.5615	24.8757	14.6229	21.7473	31.5954	26.8603	6.17757
Smp_034500	Chr_1	19904237	13581	Chr_1	Sjp_0080910	SJC_S001560	263184	11.388	Aut_Shared	Aut_Shared	11.1887	9.5622	8.02254	14.6081	9.25082	7.27826	5.40058	2.77471	8.91035	6.62405	4.83578	4.28812	9.52401	5.78394	2.42175	4.17426	3.91714	0.628941	0.937066	8.12885	0.559144	6.14996	41.9565	54.3344	36.891	33.0437	32.0792	27.766	23.7128	27.3242	22.6538	19.9045	42.612	18.3923	0	2.45622	3.22008	22.0131	0
Smp_034530	Chr_1	20078234	2017	Chr_1	Sjp_0059250	SJC_S000656	166692	0.506	Aut_Shared	Aut_Shared	98.5905	111.401	104.931	85.3802	73.6702	91.6728	104.019	94.7387	74.2299	94.2105	93.5124	91.6053	36.026	52.7306	33.0693	26.4347	11.5169	37.4304	26.3153	20.9952	21.7526	28.4551	87.1805	66.0141	91.2531	60.4464	91.5098	79.3078	104.137	87.3712	180.561	82.701	81.247	91.9223	5.63526	24.5238	18.818	9.18931	9.49843
Smp_034670	Chr_1	20690297	16654	Chr_1	Sjp_0036720	SJC_S000259	211277	15.819	Aut_Shared	Aut_Shared	5.77478	4.61617	4.09299	5.23154	4.85383	4.18247	4.7324	4.32791	6.06479	5.05009	5.02753	5.15049	7.04521	5.53393	5.09496	5.84843	3.53875	6.36975	6.70968	5.02229	4.93968	4.84085	46.2081	42.9885	37.6206	36.6012	36.0701	34.6201	37.5616	34.9752	60.4165	36.0882	50.7488	38.2363	13.2075	35.0634	43.2318	26.9414	22.2944
Smp_034680	Chr_1	20708598	13881	Chr_1	Sjp_0036730	SJC_S000259	236972	2.156	Aut_Shared	Aut_Shared	0.400668	0.118841	0.122826	0.0650591	0.093967	0.269781	0.480774	0.187898	1.28296	0	0.0619966	0.0605611	0.135159	0.139694	0.152389	0.151823	0	0.1191	0.290697	0.0455334	0.790197	0.0160884	0.209499	0.0456527	0.0832806	0.064097	0.0901666	0.190924	0.309193	0	0.247179	0.0414777	0.975033	0.0430031	0	1.31557	0	0	0
Smp_034700	Chr_1	20876534	10287	Chr_1	Sjp_0094450	SJC_S002636	20358	6.254	Aut_Shared	Aut_Shared	5.17973	5.08019	5.14469	5.11368	5.05349	5.04547	7.51362	8.24812	5.93597	5.33987	4.74473	5.03155	8.81035	7.52576	9.3031	8.5361	5.58963	8.22299	8.29778	6.12367	7.05379	6.68643	52.1124	62.5166	54.4592	52.2699	52.0254	53.2448	76.118	49.4809	158.467	42.4399	62.9263	50.9483	0	7.63912	18.209	17.9044	0
Smp_034850	Chr_1	15538397	9437	Chr_1	Sjp_0054060	SJC_S000538	91169	11.73	n.a.	n.a.	9.44481	13.9579	15.058	10.4633	13.1435	12.223	5.24313	3.16581	2.79251	9.02115	9.81119	8.44863	7.02706	6.04804	3.89373	2.86965	14.6629	2.48179	1.61169	16.2304	1.47524	12.5422	85.8936	94.4858	132.587	118.175	143.434	110.186	50.1181	77.1071	54.5852	85.2057	28.3754	75.9719	16.6087	10.5911	13.9067	50.885	7.02709
Smp_034940	Chr_1	15214373	19843	Chr_1	Sjp_0098230	SJC_S003392	329	5.138	Aut_Shared	Aut_Shared	4.2032	4.33852	3.73667	4.6956	3.98246	3.50936	1.07596	0.262818	1.13338	2.54891	2.28931	1.67723	7.16574	6.22839	2.93845	4.2996	19.0993	8.76198	8.4314	14.7796	13.054	14.8784	24.9022	32.252	34.7405	25.8755	26.0864	19.911	11.4417	23.8008	3.88052	20.6512	15.3072	17.0707	23.6434	3.71309	3.1323	11.7768	26.3629
Smp_034980	Chr_1	15009829	15281	Chr_1	Sjp_0016900	SJC_S000081	365996	19.119	Aut_Shared	Aut_Shared	10.0644	12.2087	10.3119	9.77228	12.4402	10.6175	9.66243	4.08237	8.61967	8.43221	8.44536	6.6859	10.2306	9.83563	9.46445	12.2421	11.5983	10.8549	10.4204	7.01771	10.5186	10.8877	55.8584	53.9309	64.4874	65.7252	57.3885	57.6053	51.7857	41.3613	39.5575	40.5582	50.3909	34.7385	20.1249	6.68074	29.3326	13.5232	20.3031
Smp_035010	Chr_1	14975348	3797	Chr_1	Sjp_0016920	SJC_S000081	406630	5.289	Aut_Shared	Aut_Shared	21.8859	23.8346	24.4586	23.0199	25.2044	24.2491	26.6535	26.2208	20.5616	30.0851	28.229	30.0935	13.455	11.2352	7.7545	6.41063	11.8959	47.6766	45.2884	26.0788	17.2216	39.8769	106.732	112.782	117.193	122.017	131.994	119.035	148.658	148.018	265.383	138.623	120.056	155.488	16.5857	279.644	303.685	163.629	14.2141
Smp_035020	Chr_1	14957585	16263	Chr_1	Sjp_0016930	SJC_S000081	413157	9.25	Aut_Shared	Aut_Shared	6.39709	6.67562	7.34321	5.11028	6.7677	7.18414	5.83953	4.29196	4.34387	7.22066	7.44187	7.43895	3.87796	4.24292	2.35803	2.85953	5.00812	4.86252	5.45863	6.72351	4.25428	5.67129	46.0356	39.9496	47.8558	54.0331	56.4153	54.8556	42.5015	46.3159	56.2382	47.1849	32.7071	53.0597	15.7074	8.15863	5.05894	0	0
Smp_035040	Chr_1	14898658	29053	Chr_1	Sjp_0016950	SJC_S000081	476618	17.718	Aut_Shared	Aut_Shared	0.450984	0.347067	0.575422	0.324583	0.285858	0.328281	0.46802	0.449663	0.377966	0.576539	0.392288	0.405313	0.161441	0.0843738	0.157361	0.0652846	0.157938	0.0189679	0.0534192	0.297319	0.101646	0.169108	8.25597	5.23372	6.26552	5.28152	12.4365	5.98497	6.78467	8.78481	14.7589	6.09244	6.01592	6.31651	0	0	0	1.66696	0
Smp_035080	Chr_1	14841403	5819	Chr_1	Sjp_0016990	SJC_S000081	558193	5.049	Aut_Shared	Aut_Shared	4.83333	6.85085	8.15578	6.66749	6.94169	6.16323	10.2421	14.0679	9.19803	7.85933	7.70378	8.55983	4.44563	4.97338	1.58893	2.11869	2.61207	6.29772	4.80079	2.49822	4.71246	2.57134	45.2183	61.7616	64.5186	64.4796	76.1087	62.3655	118.427	80.8768	327.729	80.573	121.511	97.459	0	42.5914	42.3723	6.85002	0
Smp_035090	Chr_1	14808153	18689	Chr_1	Sjp_0096150	SJC_S002877	7173	8.484	n.a.	n.a.	10.5638	10.2984	8.63048	10.7135	9.81444	8.29554	8.68813	3.72447	9.95261	8.87597	8.3501	7.09485	5.5271	5.30918	2.19068	3.4506	3.76723	6.97357	6.29465	4.70088	6.83974	5.48478	93.9117	96.971	94.1916	88.6291	82.3921	80.4829	85.1597	75.2668	63.6405	74.9445	108.895	71.028	0	2.89755	5.98584	0	0
Smp_035110	Chr_1	14747751	10015	Chr_1	Sjp_0017000	SJC_S000081	579489	5.108	Aut_Shared	Aut_Shared	14.4171	25.3313	26.3362	18.0414	22.6866	25.7346	20.3152	12.0813	17.3856	27.3053	27.3452	29.6006	8.90553	8.75305	5.06575	5.20114	11.5974	3.79672	4.24608	14.284	7.54024	12.8887	34.9775	44.8299	62.9813	54.4931	68.0402	64.2506	51.9618	63.3834	55.3867	64.7171	48.6405	73.8991	13.7187	10.6649	12.6889	21.4999	7.67765
Smp_035120	Chr_1	14693813	437	Chr_1	Sjp_0016880	SJC_S000081	314579	0.437	Aut_Shared	Aut_Shared	7.90701	9.38112	14.5435	15.086	10.1992	16.3048	7.64299	3.39908	2.99827	22.1768	21.4108	10.4575	2.14661	1.8419	0.468439	1.84865	2.62504	0	0.710292	5.78535	0	7.1545	5.07794	7.00817	5.38293	6.73233	10.5633	8.86978	5.93304	14.94	5.32556	14.4101	0.875309	8.33865	0	0	4.91891	4.75321	0
Smp_035140	Chr_1	14647193	8998	Chr_1	Sjp_0016870	SJC_S000081	291003	4.613	Aut_Shared	Aut_Shared	6.69463	10.8865	10.4192	7.8146	10.4085	11.7578	0.873839	0.0292729	1.48328	8.74411	8.11318	6.67992	2.82687	1.48819	0.845556	1.37406	2.53383	0.122488	0.344963	2.83315	0.515739	2.53155	5.36931	6.35041	8.65174	8.16364	8.94373	9.6931	0.748582	7.40841	0.096718	7.08425	1.43069	5.98184	1.39808	0.296381	1.16349	1.5166	0
Smp_035150	Chr_1	14638116	4549	Chr_1	Sjp_0016860	SJC_S000081	262498	26.84	Aut_Shared	Aut_Shared	5.05302	5.7564	5.19958	4.85501	5.30637	5.29313	5.12782	3.46143	4.00298	4.86476	5.3685	4.94745	13.0312	18.9649	9.57764	8.74827	20.9305	14.4159	16.2397	19.6835	20.4028	21.6008	133.744	138.654	152.129	136.128	148.465	148.133	149.629	135.301	182.276	143.408	131.648	142.158	37.4832	50.5643	47.2991	83.6328	42.5626
Smp_035280	Chr_1	14322957	18040	Chr_1	Sjp_0041970	SJC_S000333	90405	16.139	Aut_Shared	Aut_Shared	8.52387	7.62045	8.33542	8.81289	7.78286	7.59541	10.7615	8.77705	10.5721	7.44928	7.0729	6.68261	5.62594	8.36384	5.17066	4.62418	2.41637	4.27663	3.71651	3.25835	3.97553	2.68631	65.1799	69.9935	64.224	61.0029	68.1546	59.5955	80.5451	51.6053	125.062	47.5991	87.774	48.9549	6.79617	40.4192	34.0859	20.3357	11.4754
Smp_035300	Chr_1	14295236	8875	Chr_1	Sjp_0072540	SJC_S001038	62596	8.066	Aut_Shared	Aut_Shared	12.1822	11.9439	10.8506	12.7468	11.4784	10.42	19.8902	27.5228	18.5543	12.291	12.1468	14.5203	10.1511	8.21192	10.0528	10.654	8.96709	11.1457	9.47805	6.74186	16.1619	6.08947	150.528	162.473	147.258	144.28	138.176	129.679	242.552	140.128	619.754	133.178	245.383	169.458	0	12.1845	9.28459	1.94691	0
Smp_035310	Chr_1	14284878	6371	Chr_1	Sjp_0072530	SJC_S001038	32457	0.38	Aut_Shared	Aut_Shared	258.016	232.623	206.624	183.086	177.535	161.484	194.58	272.915	206.497	133.375	163.563	152.56	41.8277	42.8291	41.6314	52.0111	43.5962	51.9416	57.5875	51.5547	60.8542	53.0001	133.366	95.9054	116.635	93.8485	113.842	87.6108	124.659	84.0207	359.289	105.618	168.394	104.483	80.4138	139.116	169.963	149.783	75.3368
Smp_035360	Chr_1	14215900	8714	Chr_1	Sjp_0041940	SJC_S000333	57017	4.191	Aut_Shared	Aut_Shared	61.3201	59.8524	48.4323	52.412	55.591	50.6565	65.102	30.4484	58.8444	47.6854	39.4201	40.0651	4.39713	4.26999	3.99362	4.42178	4.47588	3.82603	3.52643	4.95639	6.05167	4.79244	162.728	140.691	160.38	145.515	134.113	139.623	185.166	129.966	161.681	106.07	187.996	112.776	5.14186	5.45182	4.28207	5.58042	5.75855
Smp_035380	Chr_1	14187931	5350	Chr_1	Sjp_0034960	SJC_S000243	29508	5.067	Aut_Shared	Aut_Shared	0.127863	0.353967	0.444231	0.498286	0.559759	0.66005	0.568246	0.293151	1.06307	0.491079	0.659486	0.463836	0.168596	0.0683864	0.0510176	0.0984794	0.321629	0.257511	0	0.1969	0.078855	0.208713	0.770557	3.27435	2.29736	2.47543	2.98477	3.68674	4.47788	3.54849	3.18202	4.57676	5.97711	2.84705	0	0	0	2.59909	0
Smp_035410	Chr_1	14138619	16460	Chr_1	Sjp_0041950	SJC_S000333	81182	4.48	Aut_Shared	Aut_Shared	43.6741	46.7834	43.3278	30.8087	34.3684	33.8862	48.0483	60.9169	42.8624	33.7931	33.5057	33.5459	8.667	6.55938	12.4968	12.9188	3.49335	4.63693	4.31841	4.1471	5.35673	3.69038	200.55	135.422	214.876	158.533	210.786	155.902	265.815	172.753	606.954	174.842	262.611	183.746	127.768	46.1146	45.1047	40.9347	113.302
Smp_035460	Chr_1	13893166	29596	Chr_1	Sjp_0117330	SJC_S009250	3484	7.362	Aut_Shared	Aut_Shared	3.28546	2.67985	2.85964	2.70551	2.53172	3.29853	1.62699	0.385188	1.44357	2.36594	1.8156	2.37658	0.792396	1.22879	0.389643	0.326368	0.50388	0.391018	0.450976	0.46983	0.570177	0.482925	21.4218	20.4679	18.6689	17.3935	23.9359	22.9013	14.5919	16.2835	7.12877	14.0286	11.7168	20.4638	0	4.15004	2.72157	4.42868	0
Smp_035470	Chr_1	13864554	5256	Chr_1	Sjp_0040630	SJC_S000314	227338	6.124	n.a.	n.a.	87.1388	82.0044	90.6351	94.9393	82.9361	86.4541	179.152	195.366	206.345	96.7253	102.016	106.498	71.0747	62.4049	57.6683	70.9771	32.4107	78.4778	76.4773	36.0358	69.911	41.6393	301.314	333.504	283.177	280.349	326.601	304.609	595.875	295.241	1180.95	310.575	750.711	344.316	81.2099	162.811	171.916	79.5086	126.096
Smp_035480	Chr_1	13853692	4325	Chr_1	Sjp_0040560	SJC_S000314	3197	2.521	Aut_Shared	Aut_Shared	30.6679	34.3526	29.4646	18.1941	30.7787	27.6289	27.411	22.2828	24.1964	24.9354	25.0787	26.1036	18.2108	31.858	12.0222	11.3778	20.1247	28.9872	31.4345	24.4051	28.6777	24.062	96.2047	57.63	103.69	91.9971	94.0723	84.4649	88.8893	74.6109	132.98	75.3117	85.5529	86.2614	47.0641	185.044	212.679	136.965	80.9497
Smp_035500	Chr_1	13818843	765	Chr_1	Sjp_0096750	SJC_S002993	12475	0.765	Aut_Shared	Aut_Shared	14.3973	11.7226	17.6542	9.16781	10.8579	13.4958	6.02207	8.82589	4.18669	10.614	12.5802	16.7266	8.81947	5.59562	6.11002	4.40776	13.4958	8.28413	4.05748	24.5108	3.86029	12.2608	9.30851	5.92089	9.00083	7.15841	12.1813	9.80151	4.87332	8.54434	10.9827	9.71281	3.70781	12.7037	8.50379	1.8153	2.3966	6.99357	0
Smp_035700	Chr_1	13633029	12393	Chr_1	Sjp_0056550	SJC_S000589	250260	10.518	Aut_Shared	Aut_Shared	0.780233	1.60778	1.38475	1.56031	2.504	3.69129	3.14265	2.56771	2.46375	6.68636	6.79887	7.60974	24.385	21.1467	17.0576	21.8517	1.46945	0.822632	0.72634	1.27501	0.851033	2.23449	6.8635	12.2731	11.3148	18.7139	12.3807	29.665	26.8137	52.1749	41.6807	53.1158	23.8011	65.6356	4.3922	3.73533	0	7.17952	7.43877
Smp_035730	Chr_4	29430290	2662	Chr_4	Sjp_0045930	SJC_S000397	16123	4.529	Aut_Shared	Aut_Shared	5.34059	7.75059	6.05171	4.8005	6.4862	6.45348	6.05232	8.67642	5.56101	7.14238	7.79144	7.87051	19.6663	23.2687	23.0572	19.6997	9.04958	12.3174	10.7275	13.138	12.5199	9.56378	33.3441	28.5303	40.9347	30.6053	36.0886	35.1916	39.0797	45.4448	105.296	44.561	40.6987	54.9567	13.6056	10.6081	5.06754	8.65072	15.3686
Smp_035790	Chr_6	11726602	442	Chr_6	Sjp_0015000	SJC_S000068	323681	0.355	Aut_Shared	Aut_Shared	1076.76	1028.5	981.675	1283.35	1224.69	897.868	2379.36	3504.09	2697.58	792.049	849.806	906.632	1258.3	1830.83	1409.03	1136.06	631.317	913.886	915.04	387.523	1549.1	416.33	889.773	1023.18	856.801	969.88	854.86	710.907	2892.88	937.841	7760.74	997.228	3663.55	1075.42	1592.99	1056.88	1051.91	396.475	4096.76
Smp_035800	Chr_6	11707371	406	Chr_6	Sjp_0014990	SJC_S000068	308377	0.266	Aut_Shared	Aut_Shared	1137.44	1059.56	940.288	1231.29	1119.59	817.259	2699.18	5360.32	3286.56	806.949	870.327	926.751	1559.33	1791.31	1700.94	1088.08	642.089	1985.77	1757.64	670.968	1213.67	828.384	767.139	813.821	742.294	704.127	624.507	531.115	3199.11	892.315	11397	947.79	4319.17	1093.73	1356.6	3839.31	3545.34	1028.27	3622.09
Smp_036010	Chr_4	7798	9379	Chr_4	Sjp_0095810	SJC_S002841	6086	11.199	Aut_Shared	Aut_Shared	0.115703	0.068637	0.118231	0.087675	0.144722	0.129844	0.0205683	0.0120579	0.103997	0.0818592	0.107419	0.104932	3.366	2.50049	0.993093	1.49051	3.28707	2.43838	3.11092	3.01008	2.60888	3.30972	2.43284	0.0191037	0	0	0	0	0	0	0	0	0	0	0	4.51429	11.8565	16.1953	0
Smp_036060	Chr_4	243160	3691	Chr_4	Sjp_0007900	SJC_S000025	583514	1.135	Aut_Shared	Aut_Shared	47.7586	44.2462	51.4462	55.9834	58.3682	46.25	45.0541	20.9395	48.2283	44.0774	34.6233	36.4675	48.8947	41.1365	32.676	36.095	27.8161	28.8153	23.9673	30.2525	26.4029	27.7716	28.7838	37.2921	31.414	40.5099	34.0115	32.3126	38.426	32.8367	30.8734	27.354	42.4893	30.2937	17.5172	15.1155	15.6433	12.1993	34.027
Smp_036090	Chr_4	308647	16392	Chr_4	Sjp_0007880	SJC_S000025	512364	12.907	Aut_Shared	Aut_Shared	7.93098	6.29289	5.62167	6.36838	6.4826	5.91472	4.997	1.50656	4.69221	5.66184	5.20906	4.60287	5.78216	6.51517	2.79321	3.61914	3.87524	4.01741	3.40846	3.44455	4.47817	3.9373	32.2824	26.5097	26.6162	26.4824	25.0763	25.0298	21.5189	23.19	11.3465	20.5427	22.4186	19.1748	228.941	33.9049	47.0729	55.7034	120.432
Smp_036130	Chr_4	410654	7682	Chr_4	Sjp_0007930	SJC_S000025	681384	2.791	Aut_Shared	Aut_Shared	53.4678	60.5899	56.9288	51.8653	58.0704	58.5086	49.1885	37.7385	37.6606	60.8126	62.7855	60.3026	31.3454	34.5007	20.0036	19.3225	23.0713	16.822	12.5662	22.7083	19.7702	23.1114	132.087	123.973	137.009	135.466	139.289	132.519	118.117	133.121	160.604	137.988	97.0221	141.232	11.1251	37.2931	36.483	41.6877	14.9744
Smp_036250	Chr_1	35091309	5864	Chr_1	Sjp_0025840	SJC_S000154	120999	4.487	Aut_Shared	Aut_Shared	43.6541	42.085	41.0175	48.5481	45.7832	39.5046	56.1101	49.3858	39.6808	39.9281	40.9305	40.8849	15.9971	11.1183	13.3528	16.5798	15.0631	16.8687	15.3505	11.5689	24.3168	7.9214	139.698	149.42	134.668	143.895	140.667	128.771	196.726	126.431	316.829	128.61	151.857	138	22.3128	50.2894	43.6236	13.3747	22.6787
Smp_036370	Chr_6	6093896	8663	Chr_UP	Sjp_0045920	SJC_S000396	497	1.67	n.a.	n.a.	74.7455	75.3323	76.9863	63.5823	70.7256	68.004	67.2412	54.4996	54.3973	67.9125	72.2749	75.6054	11.9571	8.77186	8.28631	9.55651	9.66655	8.61948	7.3452	12.5247	7.15866	12.2965	206.348	174.261	207.937	200.912	240.517	193.768	204.108	203.986	324.862	209.36	189.252	239.848	42.9363	32.3501	31.576	35.0657	19.8027
Smp_036390	Chr_6	6053137	5228	Chr_6	Sjp_0119030	SJC_S010770	101	1.291	Aut_Shared	Aut_Shared	20.5756	20.8391	15.897	20.1003	18.3605	13.7415	26.2282	17.3633	26.8386	20.6944	18.1187	18.5083	15.8452	19.1332	16.315	16.9239	12.9459	10.5408	9.7964	11.5658	13.3147	10.1666	32.2163	46.3345	30.7361	53.2261	41.5968	39.6358	260.319	211.412	266.075	183.696	324.866	222.194	13.3599	35.5854	16.8749	38.3509	22.7858
Smp_036400	Chr_6	6048576	4786	Chr_6	Sjp_0060080	SJC_S000676	70868	0.71	Aut_Shared	Aut_Shared	217.177	237.817	253.811	190.645	207.729	193.336	310.802	521.125	291.985	206.774	209.345	224.727	46.5733	45.1639	70.5457	63.9885	34.7846	22.3953	22.1157	25.62	40.8123	20.9977	299.871	265.699	332.876	271.777	365.878	261.681	520.854	312.121	1597.69	338.857	531.774	380.354	258.057	63.017	74.7132	78.9549	201.957
Smp_036500	Chr_ZW	11703125	19824	Chr_Z	Sjp_0106460	SJC_S004792	43	7.531	S0	S0	5.56318	9.18602	7.87655	8.82841	12.6974	11.0831	4.48087	4.59026	2.95766	8.41669	9.33576	6.67499	3.87842	3.37925	2.81219	3.82179	7.23329	2.69644	2.89667	5.15442	3.63905	5.27214	24.5463	42.2776	43.9098	58.7805	40.1249	53.5588	23.2515	40.3967	44.3701	46.8224	16.3551	35.2698	11.1515	9.12009	8.84222	12.1004	13.3761
Smp_036570	Chr_ZW	11967791	4049	Chr_Z	Sjp_0047930	SJC_S000427	81826	4.391	S0	S0	4.42642	4.72648	3.82958	8.36941	8.8124	8.70948	4.53764	2.39873	3.34863	7.1879	7.67103	6.92844	1.91581	1.65359	2.28352	2.82799	1.94779	2.72203	3.29639	4.63097	0.93773	3.75054	28.7142	45.6222	25.1409	46.7061	22.9959	48.4444	30.5767	49.796	34.3075	52.0283	25.9384	49.0177	48.5786	39.0482	20.7124	20.0936	0
Smp_036630	Chr_ZW	12085514	12602	Chr_Z	Sjp_0047880	SJC_S000427	2479	2.724	S0	S0	3.01266	3.76244	3.69417	5.09782	8.03232	6.99301	4.9891	2.77607	3.26011	9.71164	8.9306	8.53209	2.21024	3.43745	3.05118	3.1802	1.52473	1.85849	1.42859	2.19009	0.937349	1.78984	26.5758	34.7474	22.3028	46.9789	25.4178	40.3658	34.8643	58.9256	34.8397	54.9546	22.905	52.7328	11.8482	4.19664	5.50902	21.5045	0
Smp_036760	Chr_6	9021280	27594	Chr_6	Sjp_0094640	SJC_S002667	4695	18.766	Aut_Shared	Aut_Shared	2.09447	1.87053	1.56636	1.18845	1.79209	1.68147	0.454158	0.0935452	0.558561	0.942129	0.591184	0.389636	0.452401	0.255898	0.206484	0.249488	0.181878	0.289577	0.584934	1.05364	0.275195	1.01974	12.1138	7.16056	11.5918	10.919	9.64685	10.1142	2.85036	5.46995	1.1126	3.44673	4.33252	2.59078	0	2.64495	6.2384	10.834	0
Smp_036780	Chr_6	8887728	343	Chr_6	Sjp_0039040	SJC_S000290	286759	2.896	Aut_Shared	Aut_Shared	26.1002	27.2501	33.9704	26.7845	29.1017	27.6162	37.5025	44.81	27.8497	27.6307	23.0774	26.15	174.508	179.84	136.77	96.7711	124.162	67.4785	41.6276	67.566	83.6369	60.551	206.386	177.531	207.267	213.362	293.129	207.886	399.184	258.866	889.44	214.2	330.293	258.198	50.0558	27.2396	7.34696	28.1256	0
Smp_036920	SC_0222	268005	633	Chr_UP	Sjp_0035510	SJC_S000250	274894	0.36	n.a.	n.a.	237.556	271.168	260.4	207.674	243.112	220.945	420.698	695.061	369.214	278.66	304.83	285.44	132.691	157.155	104.887	94.5527	41.9078	36.5642	32.3637	44.5996	47.3192	35.9856	185.415	150.14	199.762	175.02	197.236	170.656	361.496	219.528	1144.78	254.672	384.076	251.063	22.0003	7.0647	12.4737	21.1949	0
Smp_036940	SC_0222	313802	322	Chr_UP	Sjp_0035490	SJC_S000250	238150	0.24	n.a.	n.a.	354.535	406.752	380.118	443.596	449.081	396.248	693.911	1294.66	696.37	342.141	333.048	406.942	625.119	680.377	728.981	521.193	175.901	419.296	488.731	289.198	379.949	241.355	145.144	212.365	214.307	253.756	214.178	269.274	2295.14	1038.41	7706.22	1157.66	2691.34	1357.72	33.9034	314.446	450.197	154.746	251.258
Smp_036950	SC_0222	323126	2001	Chr_UP	Sjp_0035480	SJC_S000250	224925	1.472	n.a.	n.a.	29.1957	33.9424	22.8474	38.402	33.0315	25.289	30.4361	14.8613	26.3077	12.9895	15.7092	14.2811	99.7825	101.788	79.7621	90.2595	60.6965	84.823	69.9596	69.0695	76.9536	67.7445	16.6282	20.8476	19.1511	17.8757	13.2348	13.9343	23.1962	8.85061	21.5002	10.6881	20.3191	10.5201	13.5039	48.7279	42.0767	18.3472	9.10128
Smp_036980	Chr_1.unplaced.SC_0094	59622	5009	Chr_UP	Sjp_0035460	SJC_S000250	88761	3.988	n.a.	n.a.	13.6464	12.1429	12.2513	12.3455	14.6814	10.7929	16.8368	12.0544	13.2149	7.29032	6.40169	6.48265	4.76116	4.14148	2.74497	3.21862	0.887437	1.54024	1.36329	2.06098	1.34757	1.29294	30.8464	29.5321	30.9569	35.8937	31.5577	28.1114	51.7755	21.7345	65.8281	18.3214	44.9777	18.8914	0	2.35176	3.09332	1.50768	0
Smp_037020	Chr_1.unplaced.SC_0094	270262	272	Chr_UP	Sjp_0134240	SJC_S027832	64	0.516	n.a.	n.a.	183.315	152.442	133.433	130.209	133.491	100.041	108.253	78.771	86.616	93.3999	95.5857	82.2387	27.0597	10.2228	23.9579	52.4282	41.12	51.6632	66.1877	40.2776	34.1222	41.0519	178.253	128.639	151.152	140.239	135.254	101.267	114.349	93.6142	148.176	97.6245	106.844	90.8796	37.5954	0	0	0	0
Smp_037200	Chr_ZW	15541091	2278	Chr_Z	Sjp_0092900	SJC_S002527	35192	3.579	S0	S0	11.5251	9.16357	7.10313	17.3228	14.2081	13.9765	8.94602	7.43283	7.89132	8.19662	9.82224	9.41241	15.1414	16.7997	23.9485	27.8312	15.6108	13.0632	14.1709	14.6128	15.9268	16.8619	52.2412	72.7227	35.8232	56.3414	30.1428	58.8306	41.0201	34.3948	62.7929	40.1436	39.0032	40.8158	30.7318	14.7488	15.1289	14.7247	13.144
Smp_037380	Chr_ZW	47458919	1154	Chr_PSA	Sjp_0045530	SJC_S000389	91625	1.145	PSA_shared	PSA_shared	27.7259	27.9718	21.6245	22.0508	23.0018	18.9226	36.2113	43.754	31.5323	18.6436	23.1141	18.0175	41.9262	52.6291	35.5667	40.9074	28.5791	37.0089	30.1252	36.331	52.2773	35.8013	27.2268	22.8447	25.3111	23.4162	23.3902	18.0234	37.8496	18.2643	84.483	23.0475	33.4252	17.8224	12.668	37.7788	31.9771	22.4996	43.1655
Smp_037460	Chr_2	4411944	13061	Chr_2	Sjp_0059860	SJC_S000668	123347	1.795	n.a.	n.a.	11.9109	10.1347	11.2122	10.5494	11.5122	9.23508	14.2441	6.16878	12.2468	11.3817	12.5101	11.9295	10.2512	9.78186	7.83139	7.86875	4.86356	5.78035	5.466	3.48423	5.39415	4.10362	24.611	22.793	22.6242	25.4131	28.4669	20.6766	39.4439	30.9902	30.8523	31.3674	38.5785	36.3098	11.1625	7.92639	2.72775	10.526	0
Smp_037530	Chr_2	4685595	1669	Chr_2	Sjp_0077020	SJC_S001295	149425	4.327	Aut_Shared	Aut_Shared	13.4757	12.139	11.9035	12.8046	12.6884	9.64484	19.2974	26.9635	20.1871	8.98914	8.15518	9.26391	49.4393	65.8956	47.6303	33.9458	26.8056	24.1033	21.7594	29.2861	29.8269	18.7329	97.9709	86.7162	84.674	80.325	87.7665	73.3586	149.872	65.2668	386.388	60.4787	159.247	73.2099	0	12.4563	24.6302	13.9885	24.9572
Smp_037640	Chr_2	5050800	54774	Chr_2	Sjp_0063820	SJC_S000771	52801	10.291	Aut_Shared	Aut_Shared	3.16879	3.28649	3.48676	2.90321	3.14983	4.02705	2.46214	1.75832	2.37663	3.84324	3.90954	4.42803	0.88661	0.675974	0.556861	0.609837	0.950297	1.16203	0.872699	1.53472	1.17072	1.30877	49.1266	47.8464	49.6195	50.1527	56.6348	63.7299	49.9392	70.1206	69.7916	68.4813	51.3276	84.5825	40.0561	32.1749	34.8051	24.2525	37.6958
Smp_037700	SC_0136	604105	2497	Chr_newZ	Sjp_0105450	SJC_S004474	11223	1.273	n.a.	S0	59.546	56.7593	58.0385	151.837	121.11	95.4944	182.665	296.273	218.431	141.148	145.005	156.827	84.4122	86.6536	230.191	160.5	80.6835	87.5054	80.1788	142.846	56.768	115.552	288.171	716.965	284.326	563.254	289.098	443.527	796.294	597.891	2475.41	605.835	1120.87	671.523	313.552	286.074	213.146	417.042	286.581
Smp_037900	Chr_1	34609180	9534	Chr_1	Sjp_0006630	SJC_S000021	385032	16.837	Aut_Shared	Aut_Shared	4.89973	5.82841	5.87444	5.3651	5.41467	6.38234	5.26028	2.83113	4.9372	7.54494	7.11311	7.70065	2.78525	2.71695	1.42785	1.63943	1.21825	0.838114	0.846479	1.85624	1.85848	1.56939	27.507	30.7459	31.9556	29.5281	34.1896	37.3861	33.2473	44.9541	32.8274	41.7838	34.4577	48.626	11.5392	4.90413	5.36412	3.14106	0
Smp_037910	Chr_1	34629971	7686	Chr_1	Sjp_0107600	SJC_S005203	1880	2.176	Aut_Shared	Aut_Shared	37.7136	41.5654	41.2554	31.7149	35.5655	39.8279	30.4867	49.9559	26.5608	28.4074	26.0449	27.4221	32.1459	30.1319	39.7156	33.7305	21.2123	12.7265	11.1058	14.7747	16.741	13.3656	0	0	0	0	0	0	462.185	405.797	1509.94	431.594	462.696	514.253	126.4	124.697	109.912	90.8038	0
Smp_038030	Chr_ZW	43231486	16617	Chr_PSA	Sjp_0116260	SJC_S008725	1885	12.664	PSA_shared	PSA_shared	6.6507	6.33271	6.61825	5.57127	5.50316	4.74219	4.31986	3.33751	4.06951	4.44678	4.09522	4.0004	4.42501	4.72279	3.45348	3.80477	3.81414	24.972	32.3903	4.58971	28.3331	4.48876	40.5617	34.068	37.8011	35.6274	44.395	31.7633	38.728	32.7038	51.1849	30.394	38.9643	31.5945	6.16909	125.1	157.173	23.4824	36.4233
Smp_038080	Chr_4	30318732	23302	Chr_4	Sjp_0004060	SJC_S000011	13783	17.788	Aut_Shared	Aut_Shared	11.2302	11.3649	11.3664	11.7967	12.8927	11.0767	16.1803	12.4423	17.228	13.1125	14.6679	15.0624	11.3556	7.09062	8.26522	13.8089	9.02127	12.9007	10.8563	9.14991	13.1802	11.491	50.5459	53.6518	53.7524	58.5152	54.0733	52.6315	71.0071	52.3136	96.3301	58.3138	83.0742	63.818	16.2426	33.3421	32.5599	27.3081	12.0392
Smp_038140	Chr_ZW	53032845	17907	Chr_PSA	Sjp_0003160	SJC_S000007	729585	5.32	n.a.	n.a.	4.62772	4.71988	4.82837	5.00955	5.29331	5.22062	3.57206	0.812247	4.2416	5.48961	5.92948	6.1358	1.99267	2.06971	0.901202	0.863054	3.73957	2.32346	2.32274	2.7531	2.59151	2.29471	21.4924	30.3672	22.7373	30.2269	23.4984	26.7739	26.8596	33.7232	9.81601	40.1496	31.9983	39.705	2.10279	3.12255	4.67383	7.42135	7.07329
Smp_038210	Chr_ZW	2096296	8883	Chr_PSA	Sjp_0076250	SJC_S001254	13820	14.782	PSA_shared	PSA_shared	7.36328	8.38935	8.99313	7.99929	7.44202	9.69938	11.1806	13.2825	11.6312	12.2972	12.9306	15.0073	16.8355	13.7648	13.4275	15.7729	21.9536	17.6805	18.1353	23.5041	17.1922	19.157	69.2795	75.6196	80.223	68.131	91.0492	90.5831	108.524	108.334	231.901	114.537	123.072	141.509	18.3104	18.2977	19.2218	20.0677	15.7677
Smp_038300	Chr_ZW	2351997	2988	Chr_PSA	Sjp_0009750	SJC_S000033	771291	2.259	n.a.	n.a.	28.4888	32.212	36.047	33.0954	39.281	35.2748	52.1563	79.8022	41.8252	39.4802	37.6912	40.4599	32.6383	45.7334	44.8969	28.9646	13.3411	35.5948	32.6187	22.2811	20.896	25.1126	256.729	293.286	292.25	339.181	326.459	293.344	435.589	315.717	1265.16	284.947	395.265	336.947	30.379	153.538	165.282	67.3652	26.5965
Smp_038330	Chr_ZW	2436586	2186	Chr_PSA	Sjp_0014490	SJC_S000064	141803	0.592	PSA_shared	PSA_shared	70.0412	70.5476	63.0722	55.9174	41.7506	41.0199	95.3282	80.2917	93.6942	43.5806	36.5771	49.4048	21.7369	18.8792	11.1282	12.9668	10.8889	11.4702	8.94558	13.3002	15.8251	13.4852	52.8225	42.674	56.8486	31.9283	56.8358	34.0495	76.0574	37.5755	141.874	31.1191	90.6084	47.8664	0	5.55999	2.44735	9.52103	44.689
Smp_038410	Chr_ZW	2585189	470	Chr_PSA	Sjp_0014570	SJC_S000064	303965	0.464	PSA_shared	PSA_shared	65.6258	75.0995	80.7568	78.2958	88.6344	73.6461	95.563	154.535	107.618	81.2874	82.9642	91.7365	13.8945	12.0658	18.7286	17.338	25.3225	21.6912	20.473	21.0683	16.1569	18.531	42.5834	46.3976	50.1791	51.1836	51.0553	48.1633	76.8759	53.1106	212.334	61.425	86.904	65.8693	0	9.92243	4.40478	0	26.9335
Smp_038430	Chr_ZW	2600104	1787	Chr_PSA	Sjp_0014580	SJC_S000064	304906	10.69	PSA_shared	PSA_shared	9.47478	10.0427	9.52487	13.7512	12.2049	11.9703	12.3791	11.5835	11.0583	10.0826	11.0283	10.1011	11.9121	11.8543	9.54617	10.8695	5.21574	4.93407	5.38462	2.59375	3.06903	6.12356	24.656	36.1072	25.7123	29.9085	26.9968	30.9579	36.6695	26.7601	60.4238	29.2568	35.6388	28.8948	0	2.5927	1.69984	0.829939	0
Smp_038440	Chr_ZW	2606415	35430	Chr_UP	Sjp_0014590	SJC_S000064	322080	38.677	n.a.	n.a.	2.35632	3.14671	3.10502	2.52777	2.73951	3.13555	2.09636	1.09978	1.71641	3.01021	3.53886	3.32526	1.27903	1.1545	0.684671	0.53435	2.1005	0.209978	0.280348	2.05747	0.273867	2.3574	70.3468	75.2888	91.3299	74.9424	97.3717	93.6336	72.1508	97.4777	71.9634	112.038	64.9967	110.519	37.3838	6.3778	8.4092	92.0893	12.7831
Smp_038540	Chr_ZW	30716599	1034	Chr_Z	Sjp_0082860	SJC_S001686	3240	0.959	S0	S0	57.4243	63.0536	61.8543	113.209	132.879	119.635	63.1705	57.3094	51.6143	95.5934	94.3597	100.48	23.0296	27.5285	42.4	44.9075	32.5893	28.7795	28.5181	67.8505	38.3522	53.5629	32.6044	66.2614	37.4037	77.418	38.8948	71.9423	40.7972	57.8349	72.3377	57.5704	36.4242	64.9254	39.4541	17.997	12.6268	29.2305	9.58217
Smp_038560	Chr_ZW	30638962	906	Chr_Z	Sjp_0063240	SJC_S000754	42220	0.679	S0	S0	731.848	564.518	569.798	1084.96	1055.33	770.748	1095.75	1391.93	1009.22	1093.42	1086.05	1121.09	695.071	880.222	1280.44	1147.82	739.913	404.486	469.022	754.134	503.362	808.25	1193.22	1891.3	974.479	1729.39	1008.33	1311.92	1551.17	1387.96	3516.28	1390.98	1534.44	1511.08	63.5927	47.5473	59.9257	112.901	35.6802
Smp_038630	Chr_4	5376531	777	Chr_4	Sjp_0020600	SJC_S000111	347131	0.76	Aut_Shared	Aut_Shared	81.8376	62.0327	63.7643	82.8685	64.5099	68.114	91.8345	116.913	76.2393	52.2129	64.0183	60.1308	39.6087	48.4056	43.4708	37.3846	18.2701	33.6886	43.943	42.5704	18.4604	39.0886	66.9672	76.2157	48.6438	54.7611	54.0414	57.0072	87.7719	48.0107	210.459	58.036	83.5851	58.6709	29.226	24.9883	46.8052	21.4077	50.3196
Smp_038640	Chr_4	5355206	21186	Chr_4	Sjp_0020590	SJC_S000111	333530	13.465	Aut_Shared	Aut_Shared	8.7571	9.28602	8.5059	9.52131	9.37359	8.60701	6.25256	1.69485	5.92494	7.13901	6.79987	7.00122	3.27997	2.97377	1.92926	2.93283	4.49414	3.19938	2.90091	3.85844	3.98258	4.74347	36.3401	37.9264	38.3077	38.1201	35.0653	35.3505	25.6074	26.1483	12.0972	25.4772	26.4267	27.9328	12.9461	15.9363	15.8434	31.6553	0
Smp_038700	Chr_4	5084203	7519	Chr_4	Sjp_0020530	SJC_S000111	83664	3.774	Aut_Shared	Aut_Shared	46.7513	54.2452	53.2925	43.2621	52.2318	47.8156	50.2619	27.9089	49.1062	51.705	45.8653	51.6882	10.4846	12.4227	8.37182	10.7629	16.1148	11.8365	9.90762	19.0256	15.2613	14.91	72.8717	66.329	85.5931	79.5476	87.314	76.5908	85.1981	78.2561	86.568	68.0408	93.5114	86.0553	0	0	1.01889	0	0
Smp_038710	Chr_4	5065367	18639	Chr_4	Sjp_0020520	SJC_S000111	68829	14.3	Aut_Shared	Aut_Shared	3.94165	4.46149	4.25924	3.61949	3.79685	4.24034	3.05246	2.27578	2.56551	4.00216	3.60801	4.10884	5.7084	6.42854	3.58588	3.04151	1.73096	2.48352	2.18156	2.59977	1.96915	2.75574	32.7966	28.5209	36.9292	26.1824	34.7632	32.2173	32.9256	37.3188	41.5751	34.8823	26.7415	42.6467	9.30515	9.22082	7.77314	14.3369	20.9302
Smp_038730	Chr_4	5009937	21710	Chr_4	Sjp_0088690	SJC_S002141	64	9.691	Aut_Shared	Aut_Shared	29.0591	32.8374	31.5202	18.0925	22.6822	31.075	6.79789	1.88111	9.61437	35.6766	34.1368	30.5305	3.80573	1.4055	1.33109	2.33785	30.944	6.35855	8.97879	39.1282	8.76395	49.3244	47.2938	30.163	51.2928	35.008	52.7772	52.0635	13.1133	59.5698	6.19343	61.482	20.0725	57.1998	8.13654	1.03683	1.0502	1.46432	9.02855
Smp_038840	Chr_1.unplaced.SC_0034	159561	7509	Chr_UP	Sjp_0026980	SJC_S000163	220749	4.753	n.a.	n.a.	12.4496	12.2909	11.338	10.6831	12.4889	12.6352	7.02712	4.43207	3.49178	8.51411	7.93045	8.07648	6.92379	7.37192	5.77039	5.62251	4.65945	3.92629	3.34827	4.06832	4.26987	2.94432	32.3568	26.8439	30.5568	28.9453	28.4177	30.5357	20.5441	21.1786	24.4175	20.5843	11.7212	22.2516	10.9765	15.1855	13.8274	10.4839	9.32624
Smp_038870	Chr_1.unplaced.SC_0034	49014	29369	Chr_UP	Sjp_0027010	SJC_S000163	307337	19.081	n.a.	n.a.	15.2568	15.7915	16.2447	16.9591	15.491	15.6073	11.9753	5.34313	9.92626	12.6495	12.5882	11.7219	5.98891	2.91633	3.53273	6.02647	5.54646	4.72848	4.40722	4.72026	5.42982	5.56614	95.8901	103.526	94.5491	91.8404	104.132	96.84	72.3239	69.4005	57.657	69.8635	65.7921	69.3184	0	25.7119	26.1255	21.256	0
Smp_038940	Chr_ZW	43674917	6993	Chr_PSA	Sjp_0054450	SJC_S000549	182401	4.308	PSA_shared	PSA_shared	23.2603	27.1805	25.6331	25.6571	29.5801	26.4968	22.6976	18.7759	18.4175	19.5472	21.0984	19.3369	14.565	13.0588	14.4561	17.0976	5.78246	5.08284	4.30553	4.4589	9.23019	4.59866	57.3757	67.1162	64.0828	75.3855	64.0227	69.2757	70.1986	51.2179	105.323	56.3075	63.5955	55.4191	102.37	16.3354	25.7704	8.37603	130.322
Smp_038980	Chr_ZW	43618768	10898	Chr_PSA	Sjp_0077180	SJC_S001299	63598	9.045	PSA_shared	PSA_shared	12.7976	13.9938	13.8336	23.2306	22.3759	24.3398	21.1881	21.3341	19.3305	32.9109	31.6096	33.0286	7.11462	7.76184	5.83869	6.35577	6.46044	7.66083	8.20283	6.57297	9.40681	7.31567	97.8877	186.854	106.052	177.022	113.23	194.136	186.826	244.087	348.331	238.417	186.437	264.29	14.6712	27.0783	37.3136	16.004	24.2677
Smp_039000	Chr_5.unplaced.SC_0198	302634	9616	Chr_UP	Sjp_0049680	SJC_S000459	354173	1.696	n.a.	n.a.	102.377	122.672	146.694	118.847	115.273	134.695	124.951	115.927	108.929	108.183	119.951	128.491	24.347	23.0341	20.4155	17.4599	17.1785	12.006	17.5599	16.717	16.6714	15.3279	294.925	376.509	358.98	334.582	483.581	427.543	525.79	429.682	878.649	447.489	509.5	491.805	23.3711	104.696	155.634	72.5319	26.6645
Smp_039080	Chr_5.unplaced.SC_0198	135707	13470	Chr_UP	Sjp_0104600	SJC_S004286	3019	2.852	n.a.	n.a.	17.1133	14.0149	12.3493	10.3774	12.2181	12.1347	11.0245	7.29157	6.687	14.3269	12.2791	12.3611	6.02131	8.99051	3.75374	3.64542	7.76045	4.58206	5.55351	9.99454	5.32432	8.32279	87.3925	55.2891	72.843	50.8885	65.8227	67.7615	50.7077	59.2316	60.4252	55.5351	38.6325	55.2629	14.3726	48.9114	21.425	40.4857	16.2476
Smp_039130	SC_0182	370220	45359	Chr_UP	Sjp_0102650	SJC_S004058	2232	9.388	n.a.	n.a.	9.59261	8.07858	7.47503	8.94974	6.38768	7.62065	5.36112	2.8624	5.84626	5.39867	5.99412	4.72877	2.16355	1.8931	1.12827	1.32106	2.96845	2.66674	3.10678	3.59507	2.13918	2.84083	39.9052	40.5322	33.5364	26.9175	34.4074	35.0552	32.5354	29.2147	30.1771	32.1328	38.8482	27.0475	5.94893	12.9276	17.331	16.1353	19.9736
Smp_039180	SC_0182	178547	28550	Chr_UP	Sjp_0085950	SJC_S001837	4531	23.07	n.a.	n.a.	8.20031	8.00763	6.5773	7.87978	7.5171	6.75059	9.61514	8.34683	8.84097	9.59373	9.82061	9.85358	6.76225	6.13837	6.12093	8.0706	5.79598	6.77503	6.3819	7.03999	5.42304	6.99301	68.5956	68.8272	67.4004	61.8856	58.4252	57.1741	86.754	78.1939	141.447	82.1814	88.2382	86.869	16.8837	46.3551	42.019	32.3522	45.3896
Smp_039390	Chr_2	28826659	5965	Chr_2	Sjp_0017440	SJC_S000084	323943	3.8	Aut_Shared	Aut_Shared	24.2103	27.3753	29.2689	22.1475	25.8039	26.5568	26.7017	21.8545	21.914	22.8841	22.7933	23.3308	7.14335	7.26215	6.23447	6.51846	5.12031	5.95881	5.41179	5.96906	3.9606	5.99021	70.9825	63.8844	80.7516	73.8037	88.0493	78.6259	77.5059	60.7919	118.021	62.1552	69.8324	63.7304	60.8282	25.8728	14.3825	16.579	31.7264
Smp_039400	Chr_2	28796005	670	Chr_2	Sjp_0017450	SJC_S000084	339068	0.519	Aut_Shared	Aut_Shared	1183.41	1078.7	1084.26	1225.65	1096.11	926.266	2147.88	3449.27	2320.35	871.068	902.429	980.909	1830.58	2126.78	1940.7	1542.27	635.422	1066.37	1005.32	605.006	1047.13	627.636	954.379	989.265	832.387	834.149	917.764	752.926	1899.95	688.222	5592.07	738.607	2277.61	839.454	133.111	959.108	889.393	413.766	282.507
Smp_039490	Chr_5	6407653	17379	Chr_5	Sjp_0096400	SJC_S002938	4237	10.259	Aut_Shared	Aut_Shared	21.956	18.0572	16.1072	21.3703	19.3529	16.6404	13.0227	3.86983	13.7934	14.0678	12.9508	11.0473	14.9392	13.8187	7.56018	12.1204	18.7048	13.2227	15.0564	16.0749	15.5117	15.6001	105.64	101.617	88.3481	88.6428	81.3484	81.3837	70.234	69.1845	37.3657	64.8058	84.3739	57.6794	23.2323	50.1509	43.2826	51.0306	14.7244
Smp_039590	Chr_ZW	52976256	3730	Chr_PSA	Sjp_0087610	SJC_S001987	5746	0.191	PSA_shared	PSA_shared	68.9716	83.1715	58.2313	69.0321	78.4915	87.5517	30.7527	28.2798	40.3973	76.1094	67.1822	70.412	0.744808	1.28495	1.29886	0.82867	4.92072	0.812576	0.748948	6.77801	0.904824	5.32861	0	0	0	0	0	0	47.9034	310.015	136.162	228.486	223.796	266.5	0	0	0	15.8133	24.939
Smp_039640	Chr_ZW	52837260	18414	Chr_PSA	Sjp_0084270	SJC_S001755	126203	14.783	PSA_shared	PSA_shared	11.5409	17.2109	14.6173	15.2289	15.0749	13.2005	13.7976	8.10235	14.3485	14.3871	13.7525	12.2947	7.97655	10.7273	6.59607	9.52023	8.81506	9.74121	10.6702	6.6246	12.0738	8.51376	39.6546	52.5638	59.0482	50.1218	53.4994	44.7366	50.9567	49.7835	53.3137	47.7567	59.8196	46.0391	0	9.96539	10.2675	4.88104	0
Smp_039650	Chr_ZW	52804752	20815	Chr_PSA	Sjp_0084280	SJC_S001755	151087	19.493	PSA_shared	PSA_shared	3.22395	2.45798	2.83928	2.20191	2.48395	2.27521	1.87296	0.921346	1.16508	2.51942	2.74282	2.62573	1.58601	2.65238	0.665477	0.541672	1.90134	1.05899	0.760522	1.74093	0.749908	2.84316	54.3848	30.0166	43.0612	36.6199	49.9312	37.7815	30.0993	37.2078	28.1385	37.8623	19.0181	43.9215	20.474	14.1573	22.907	40.4842	8.6881
Smp_039670	Chr_ZW	52713270	8577	Chr_PSA	Sjp_0005500	SJC_S000017	137764	6.391	PSA_shared	PSA_shared	19.8355	22.1704	17.7344	15.7145	19.9391	13.5151	15.6782	8.1347	12.1414	17.0082	14.7866	11.727	18.0545	12.1743	16.2614	21.5734	9.49598	10.6977	11.7978	11.4221	14.6084	10.1025	39.8197	34.4325	41.5281	41.2085	35.8465	29.0602	37.0962	35.2044	36.2189	31.8018	32.3027	25.8886	8.51109	14.4445	18.3273	12.7089	21.4736
Smp_039740	Chr_ZW	52367838	10853	Chr_PSA	Sjp_0083480	SJC_S001708	74250	5.313	PSA_shared	PSA_shared	10.1212	8.58413	8.94674	10.1643	9.87607	8.92232	14.047	8.20942	12.906	14.5679	11.7488	15.8512	6.07699	6.26691	4.63688	4.21699	12.261	7.61643	8.03664	10.968	11.1562	12.6755	107.292	132.616	99.2857	122.157	105.602	104.191	150.885	157.946	163.943	124.667	160.083	178.714	113.289	72.5221	84.3032	113.064	69.3074
Smp_039810	Chr_ZW	51987183	50858	Chr_PSA	Sjp_0084390	SJC_S001761	8048	23.803	PSA_shared	PSA_shared	5.46184	4.34876	4.27765	5.74553	6.05149	5.43088	1.54834	0.198557	1.7798	6.38777	7.18778	5.75971	1.28972	0.414369	0.532654	1.08913	3.14089	0.444258	0.378399	2.78795	0.29033	2.94643	35.3155	39.8603	28.7515	40.1292	29.558	38.2986	11.9149	43.2041	2.69663	48.1261	14.5261	41.2244	9.42743	1.05955	1.70579	5.2905	7.50258
Smp_039870	Chr_ZW	51840010	49421	Chr_PSA	Sjp_0081170	SJC_S001567	17449	13.714	PSA_shared	PSA_shared	2.64557	3.41903	3.10887	2.5877	3.10227	3.82775	1.3521	0.571102	1.04033	2.70253	3.00195	2.53256	1.46593	0.535983	0.529502	0.829406	2.85213	1.09276	1.01119	2.33188	1.42557	2.09219	15.0934	14.2814	18.7104	15.9499	18.3343	21.3114	9.17779	16.7479	7.6153	18.6373	8.24163	17.1826	19.3324	3.0037	8.0128	8.16242	0
Smp_039970	Chr_5	7280956	282	Chr_5	Sjp_0115010	SJC_S008445	4964	0.224	Aut_Shared	Aut_Shared	241.991	234.489	288.458	291.806	319.265	267.454	729.594	1344.33	787.056	375.349	416.508	496.631	116.299	115.469	65.0904	60.1597	148.986	324.391	293.887	201.718	149.601	205.108	274.763	376.916	257.841	434.104	372.214	289.398	1318.75	609.319	4145.27	676.865	1607.21	868.184	105.68	717.49	715.935	221.823	0
Smp_039980	Chr_5	7299366	816	Chr_5	Sjp_0102210	SJC_S004001	23401	5.03	Aut_Shared	Aut_Shared	7.94287	9.27085	9.92393	7.6687	8.94148	8.4125	9.11302	12.4029	6.85946	6.17062	7.33428	5.63293	94.6206	130.564	80.4031	55.7857	48.149	32.4161	36.8977	45.1832	48.0812	48.4413	77.8933	73.9192	100.884	93.0206	104.9	94.4584	122.84	83.4087	309.308	89.5454	105.249	71.6921	22.3969	22.2888	10.4956	8.17339	0
Smp_040020	Chr_5	7528102	9886	Chr_5	Sjp_0001170	SJC_S000002	608516	8.739	Aut_Shared	Aut_Shared	1.65572	1.75916	1.63634	2.13475	2.10962	1.6473	4.37546	4.40385	3.14854	2.06807	2.2178	2.5101	3.09848	1.91705	1.92919	2.32717	0.478653	2.00674	2.04085	0.490159	1.45091	0.587334	9.44674	13.6835	11.7077	13.6012	10.7624	10.0018	29.3195	13.5414	54.4178	14.0823	23.851	15.7409	0	4.69312	13.889	1.50434	0
Smp_040080	Chr_5	7707940	12922	Chr_5	Sjp_0001120	SJC_S000002	481272	9.909	Aut_Shared	Aut_Shared	14.4061	14.7646	15.4735	11.9048	9.09818	12.6496	15.7491	8.20382	17.8067	10.375	9.90108	12.5971	14.0415	15.6234	8.713	7.48043	17.3998	14.6703	16.4543	17.0216	14.2997	14.4999	83.909	68.0838	87.5848	51.3979	95.8402	73.2102	123.484	76.9202	115.672	75.5344	157.779	96.3597	36.3206	49.7901	45.0715	41.3101	16.7208
Smp_040100	Chr_5	7827297	14517	Chr_5	Sjp_0001070	SJC_S000002	311368	37.936	Aut_Shared	Aut_Shared	4.19556	4.22129	4.07663	4.56638	4.9185	4.00941	12.8785	19.5065	12.8904	5.79626	5.28866	6.09206	17.882	20.6813	30.7431	18.7973	2.82499	10.1165	10.3701	3.13478	5.89932	2.7075	35.2965	37.8318	34.3145	36.0358	35.6598	34.8791	224.806	93.4643	599.484	82.4207	242.429	104.623	5.0301	53.3313	48.8677	20.9255	5.63276
Smp_040110	Chr_5	7860238	28284	Chr_5	Sjp_0001060	SJC_S000002	285156	25.644	Aut_Shared	Aut_Shared	0.0505288	0.079932	0.0206531	0.0492282	0.0632017	0.0510337	0.0673678	0.052658	0.0170312	0.107246	0.119883	0.193482	0.172209	0.195326	0.0759947	0.0645759	0.131813	0	0.0438972	0.141528	0.0894939	0.0473743	0.209716	0.616951	0.500202	0.288735	0.203085	0.716707	0.638371	1.56936	1.23718	1.61931	0.732033	2.97029	0	0	0	0	8.76993
Smp_040190	Chr_1	60201487	32013	Chr_1	Sjp_0003620	SJC_S000009	347939	52.951	Aut_Shared	Aut_Shared	7.35352	6.16953	5.08863	4.87947	4.80169	4.5751	3.43661	1.08129	2.74114	2.95063	2.48644	2.04666	3.54339	2.73718	1.78301	2.40943	7.56537	5.39661	4.74133	8.20672	5.38989	6.75276	47.4615	31.4582	38.9073	30.1869	34.5705	29.468	22.9713	18.0671	13.2455	15.2924	19.9918	13.2908	36.8589	53.1885	38.2621	68.0816	24.8236
Smp_040280	Chr_1	60402319	7473	Chr_1	Sjp_0037800	SJC_S000271	87355	3.784	Aut_Shared	Aut_Shared	47.9404	33.7205	29.7426	41.3685	34.1046	31.9338	43.5852	33.081	38.05	31.7371	30.2017	28.8123	17.1153	16.2836	13.6874	15.1157	8.76896	8.51721	8.43178	11.6435	11.8552	9.56286	125.666	106.752	92.9678	88.9038	76.2465	85.0313	112.395	75.1359	149.542	74.4259	109.487	74.5023	4.48251	26.6873	32.5524	19.5417	75.938
Smp_040350	Chr_1	60681334	17089	Chr_1	Sjp_0019100	SJC_S000098	34688	24.982	Aut_Shared	Aut_Shared	1.27076	0.994857	1.01232	1.18471	1.23265	0.820714	1.61357	0.767557	1.6958	0.482291	0.49224	0.324046	2.96846	1.55647	1.14	2.02455	0.562193	1.32214	1.5439	0.332872	2.54275	0.535796	7.19052	6.55455	5.49536	6.92524	6.17858	4.88012	10.0331	2.59424	8.42406	2.64672	11.7444	2.21396	0	6.67701	5.24348	2.13562	5.288
Smp_040360	Chr_1	60717178	10782	Chr_1	Sjp_0019110	SJC_S000098	71703	13.258	Aut_Shared	Aut_Shared	4.13742	4.88944	5.10333	4.8244	5.48581	5.48393	8.38294	7.20097	8.554	9.45328	10.2834	10.8529	3.49687	3.64103	2.21821	2.91888	3.84349	3.80774	3.77129	4.16207	4.14753	3.93538	37.2586	42.3446	42.7245	49.1928	44.9619	49.7573	69.4762	69.7866	111.76	79.1571	78.255	86.4806	0	13.4719	14.5022	17.2754	19.567
Smp_040440	Chr_3	2889769	12615	Chr_3	Sjp_0019190	SJC_S000098	284924	18.81	Aut_Shared	Aut_Shared	0.654425	0.531242	0.696878	0.589108	0.635459	0.68802	0.232671	0.0143579	0.162532	0.57788	0.575589	0.513672	0.100102	0.11311	0.0297501	0.0584709	0.0341005	0.0655261	0.0492109	0.217113	0.0668845	0.0885147	4.08103	4.14382	3.62429	4.06461	5.10115	4.6292	2.49892	4.99827	0.307343	5.00261	1.75118	4.22414	0	0	0	1.00963	6.27001
Smp_040450	Chr_3	2847302	6659	Chr_3	Sjp_0051910	SJC_S000491	265073	6.783	Aut_Shared	Aut_Shared	5.34886	6.64825	6.07084	8.29238	7.25786	6.25981	13.6345	14.5727	13.9294	8.39878	6.95616	7.96932	6.36094	3.93394	7.24988	8.60306	3.78993	5.29641	4.70794	4.46108	7.47577	4.12504	23.4185	37.6237	30.1186	35.4034	29.5456	32.2224	64.0423	36.0362	125.331	29.2736	72.4241	36.8539	0	31.027	30.2253	20.6263	0
Smp_040500	Chr_1	61143185	6938	Chr_1	Sjp_0051840	SJC_S000491	113392	11.911	Aut_Shared	Aut_Shared	13.8159	14.2835	12.8616	14.1433	13.7432	14.2104	16.8731	10.929	16.916	16.7346	16.2157	15.7745	23.3129	20.2287	18.8293	23.5512	26.7854	26.4497	27.4249	27.6032	26.5116	32.1239	96.5949	105.876	100.591	95.1018	98.3375	103.172	117.887	105.187	137.996	102.895	129.682	108.035	16.3041	50.893	63.8909	58.5771	9.23375
Smp_040560	Chr_1	61416483	16279	Chr_UP	Sjp_0035810	SJC_S000252	79409	8.82	n.a.	n.a.	2.86478	2.61451	2.25182	2.92621	2.71043	2.5884	3.47344	1.97502	3.81288	3.54877	2.62177	2.66469	2.58424	4.686	1.41049	1.30753	2.72181	1.99726	2.02114	1.87659	1.50308	2.00289	23.8187	20.7208	21.9191	21.1737	19.857	19.8694	22.1091	22.2397	25.226	17.4891	27.35	17.7858	6.94179	1.91009	1.75449	2.15158	6.51936
Smp_040710	Chr_3	20848999	2544	Chr_3	Sjp_0043430	SJC_S000355	54632	13.528	Aut_Shared	Aut_Shared	1.80393	1.47733	1.55623	2.10484	1.99178	1.52635	2.56259	4.4819	2.07698	0.939046	1.09675	1.0424	11.8138	14.0077	10.5144	9.37477	4.90376	10.7226	7.93075	9.68943	5.30659	7.46164	67.4153	70.2773	58.6683	66.895	50.5801	59.7775	168.404	52.4415	498.741	69.2612	172.426	60.5884	18.082	117.036	109.456	110.739	95.8127
Smp_040720	Chr_3	20792040	9293	Chr_3	Sjp_0049260	SJC_S000455	239168	7.676	Aut_Shared	Aut_Shared	9.31251	7.57717	6.81354	8.53373	8.23463	10.0023	4.69631	3.11378	3.5656	14.0415	15.0451	18.0988	6.14981	6.7638	2.79758	2.62308	10.4308	3.23185	3.60733	10.338	4.63049	10.6699	40.9796	41.6735	32.3718	36.4884	31.0914	46.3237	32.9541	90.8292	37.6057	91.5353	29.7497	119.598	78.9156	10.1008	10.6177	56.3362	41.8357
Smp_040800	Chr_3	20532384	31764	Chr_3	Sjp_0124460	SJC_S017592	783	0.247	Aut_Shared	Aut_Shared	92.6793	101.659	91.6663	85.7505	72.1789	84.1859	66.2123	28.4286	43.0264	74.7602	63.3148	54.4481	7.72957	5.29957	7.74325	10.3358	12.3331	10.0017	9.07818	12.5227	11.0768	11.1507	0	0	0	0	0	0	147.095	135.339	96.4867	91.0735	23.7878	138.487	27.1876	35.3615	35.9823	34.1758	33.1684
Smp_040970	Chr_1	41547115	25117	Chr_1	Sjp_0091260	SJC_S002379	2895	20.778	Aut_Shared	Aut_Shared	24.7266	23.8613	21.6472	20.3873	18.6232	20.7291	17.1112	11.1068	14.8609	22.9743	21.8143	22.6225	20.336	22.5286	12.3733	16.8525	24.0177	20.0095	21.4042	32.2018	13.1348	33.9203	214.181	177.303	206.649	160.18	201.742	185.829	170.428	210.965	206.35	204.433	163.045	223.989	103.731	85.8958	118.751	156.316	50.9318
Smp_040990	Chr_1	41627314	569	Chr_1	Sjp_0019230	SJC_S000099	75365	0.398	Aut_Shared	Aut_Shared	43.9517	37.3389	28.9432	42.2917	34.6139	25.9403	63.0842	84.1431	52.6731	17.7688	19.8146	14.1068	94.606	104.681	43.9517	41.1121	9.32431	12.1062	8.72822	7.77565	20.7601	3.13986	33.5025	34.4956	27.9678	28.4443	24.8731	26.3339	53.3081	13.9818	140.325	14.4268	50.0258	14.9573	0	11.2081	0	7.21367	0
Smp_041050	Chr_1	41784923	8371	Chr_1	Sjp_0019290	SJC_S000099	271742	5.862	Aut_Shared	Aut_Shared	18.0151	20.8492	18.6797	18.5444	22.879	18.654	19.3918	12.3472	13.3115	10.7237	10.8081	10.2237	23.4597	21.3943	16.5108	14.4718	11.5112	9.47972	8.1947	13.5405	10.3314	11.8984	35.6895	37.7036	39.9295	44.2402	38.4803	38.0997	46.2755	24.4095	56.3257	24.7492	36.6026	24.8664	8.98381	3.2901	4.86724	9.52583	5.34803
Smp_041100	Chr_1	41912575	14921	Chr_1	Sjp_0019360	SJC_S000099	379899	11.976	Aut_Shared	Aut_Shared	3.80491	3.55151	3.00724	3.08036	2.7574	2.97478	4.04872	1.35307	4.37623	2.73386	2.14292	2.52941	2.87505	3.03807	1.20045	1.08049	1.94125	1.99437	1.4978	1.69439	1.86607	2.21512	25.7259	22.7961	24.2822	17.5697	21.5672	20.3337	26.3841	16.3528	15.6799	12.3833	30.0747	16.743	2.42517	7.20482	2.69713	7.2459	0
Smp_041190	Chr_7.unplaced.SC_0100	32856	21533	Chr_UP	Sjp_0027240	SJC_S000165	391724	6.81	n.a.	n.a.	5.26423	5.53078	5.61903	5.33469	5.14663	4.59083	3.38244	0.87248	3.24942	4.9039	4.534	4.54406	5.19421	5.78544	2.80448	3.24606	10.5548	6.56437	6.37141	9.59829	7.73883	9.79039	41.4733	39.5073	42.3941	38.5018	46.3584	36.2843	28.0687	37.9249	14.8196	35.8942	29.4128	38.8197	2.70758	1.52407	1.61755	0.826303	0
Smp_041350	Chr_7.unplaced.SC_0100	486592	692	Chr_UP	Sjp_0112810	SJC_S007855	423	0.698	n.a.	n.a.	16.7075	16.8857	18.4004	11.6555	12.7709	10.4163	6.43511	2.515	1.04286	5.44116	7.08537	2.993	4.6403	2.11484	2.8103	2.13182	3.72987	1.99088	0.448551	1.82673	3.04822	1.29088	9.70902	7.40506	9.64889	8.1689	12.0137	6.63613	4.17936	4.19165	3.81843	5.44635	0.836795	2.82333	0	0	0	0	0
Smp_041370	Chr_7.unplaced.SC_0100	578068	37439	Chr_UP	Sjp_0043120	SJC_S000349	76539	41.176	n.a.	n.a.	2.88464	3.85801	3.34747	2.18359	3.26699	3.48556	1.16358	0.629661	1.04654	2.91976	3.17476	1.93749	3.99065	2.2496	1.80437	2.83516	2.5125	1.28794	1.16071	2.11026	1.08176	2.34423	31.7512	24.3544	41.5615	35.8774	38.5055	39.297	13.8271	30.8017	12.7609	34.1486	13.6391	21.6945	10.2346	10.5389	6.08461	6.74126	7.36286
Smp_041480	Chr_7.unplaced.SC_0100	969644	14671	Chr_UP	Sjp_0038600	SJC_S000283	26670	17.266	n.a.	n.a.	13.4709	13.5931	12.1471	11.9015	12.1678	9.98834	12.9073	8.52481	13.7943	10.8618	9.71557	9.04445	20.4093	13.2471	19.1601	28.0832	8.58147	12.9965	12.4616	10.4114	8.45416	14.3544	100.099	89.0593	102.886	91.6229	95.327	76.5446	93.0979	70.9379	112.556	64.5455	108.46	65.2733	26.5765	3.99578	3.74142	6.48041	10.8754
Smp_041490	Chr_7.unplaced.SC_0100	1015021	6440	Chr_UP	Sjp_0066530	SJC_S000839	65993	2.97	n.a.	n.a.	29.4491	28.5554	28.2646	28.8091	26.3303	29.8658	36.6844	27.8711	33.8712	32.851	35.3739	34.0712	6.35876	11.5953	5.13889	4.2651	4.00787	4.96309	5.20542	4.41649	4.38906	3.81452	56.7458	53.8506	52.3922	48.5844	53.1789	55.5722	69.4815	54.7928	91.9691	59.8888	70.6401	64.158	5.19809	14.3786	15.9963	8.50731	26.476
Smp_041500	Chr_7.unplaced.SC_0100	1021672	3740	Chr_UP	Sjp_0066540	SJC_S000839	69539	5.72	n.a.	n.a.	8.98576	10.213	9.81477	10.6427	10.6255	11.999	13.6716	13.1259	13.5911	16.3017	16.7782	16.7321	36.0314	36.5378	32.8591	29.7524	24.4995	29.7639	33.7785	37.1794	31.4714	27.8855	74.4924	96.3312	94.0248	91.8303	97.5868	110.379	117.063	128.955	202.726	135.642	126.953	143.979	171.655	59.141	63.1105	72.2275	198.73
Smp_041520	Chr_7.unplaced.SC_0100	1063763	9385	Chr_UP	Sjp_0116800	SJC_S008987	1406	1.675	n.a.	n.a.	4.77046	4.28311	4.18959	3.93586	5.20089	3.55934	0.893872	0.161237	2.17288	2.11104	2.71319	2.18266	3.77135	4.76388	1.21785	1.15646	3.65166	2.58362	1.3891	2.35714	2.42741	2.23679	10.7878	6.34719	10.2922	7.92136	11.8396	14.0096	7.16461	13.6617	1.27281	11.5334	15.0623	13.2862	2.79097	2.96233	7.76617	3.79249	4.7039
Smp_041570	Chr_7.unplaced.SC_0100	1278238	1276	Chr_UP	Sjp_0013150	SJC_S000057	547647	1.251	n.a.	n.a.	11.221	15.5658	12.7009	8.74569	15.5467	16.2731	2.66986	0.539712	2.09471	7.95618	6.51762	8.14104	1.86619	0.28673	0.721933	0.660646	1.79803	0.431876	0.243258	1.48601	0	2.27523	6.72918	5.69301	9.44119	10.0519	8.09227	9.55955	2.04469	5.39261	1.08973	4.0752	1.73991	5.5251	0	0	0	1.25641	0
Smp_041650	Chr_7	6599032	521	Chr_7	Sjp_0013100	SJC_S000057	367410	0.234	Aut_Shared	Aut_Shared	675.568	643.84	571.5	812.832	717.733	441.207	2220.26	4228.24	2708.83	626.831	687.744	762.773	723.67	1001.54	1628.82	988.268	156.053	512.467	505.811	167.414	613.782	212.607	0	0	0	0	0	0	1140.74	313.777	4401.46	323.762	1797	419.586	23.9843	808.022	575.467	188.383	86.2188
Smp_041700	SC_0180	468955	1103	Chr_UP	Sjp_0057450	SJC_S000617	19734	1.133	n.a.	n.a.	12.5802	8.5935	5.96006	7.79951	7.86769	5.77541	1.93139	1.31103	1.9274	7.86009	8.84805	6.79931	1.60281	0.696574	0.989824	0.636887	4.81009	0.749421	1.12565	1.71908	0	2.42962	8.07643	5.09133	5.15984	5.29503	4.18985	3.54874	1.59639	5.31324	1.19113	5.73931	1.56619	4.79584	5.23062	1.113	0	0	0
Smp_041730	Chr_4	21369753	9643	Chr_4	Sjp_0000690	SJC_S000001	736428	0.684	Aut_Shared	Aut_Shared	141.763	120.619	111.888	155.237	135.654	120.326	116.856	52.3166	111.315	137.281	104.548	120.262	10.9103	10.7829	5.86973	5.80974	20.268	12.8011	12.6824	15.1409	17.9809	14.7755	102.074	117.169	94.0462	91.8101	89.2598	90.5352	101.083	113.389	85.7938	85.3653	112.014	101.749	7.03291	6.83291	0	3.08605	0
Smp_041770	Chr_4	21541179	26076	Chr_UP	Sjp_0000700	SJC_S000001	749933	31.307	n.a.	n.a.	14.1274	14.1832	13.7452	12.4062	14.4048	14.1431	7.82848	2.41113	7.48211	15.2854	15.9849	13.3085	10.2818	7.50789	5.65493	9.75227	28.441	9.45719	9.13004	25.4749	10.8073	23.5261	80.1776	71.6045	81.3609	81.3494	83.0496	82.0461	45.196	80.5379	25.334	85.3847	47.87	76.0058	64.1919	45.5963	32.5125	93.164	21.5601
Smp_041830	Chr_4	21813853	3792	Chr_4	Sjp_0000800	SJC_S000001	1111603	5.838	Aut_Shared	Aut_Shared	25.5986	24.0949	25.175	22.3688	21.2379	20.9973	28.7437	32.8916	24.8124	25.8202	28.5737	32.5642	29.505	26.9094	20.2441	16.7934	37.8523	44.179	38.3904	59.8935	38.4938	51.0014	219.905	174.616	175.041	162.331	209.269	170.512	268.96	225.704	557.466	249.214	269.545	303.092	103.873	71.5704	94.2077	110.154	83.2232
Smp_041890	Chr_4	21930734	7150	Chr_4	Sjp_0000830	SJC_S000001	1181860	14.077	Aut_Shared	Aut_Shared	2.63871	2.32979	1.77771	2.70032	2.40343	1.90068	2.8881	1.85139	2.46137	1.1257	1.1964	1.21508	13.1148	12.6595	10.5312	9.8692	6.95906	9.05612	8.5088	10.6962	7.25742	9.65128	27.6078	27.5421	20.3635	24.6078	18.4414	20.0698	31.7956	11.1153	36.9039	12.5116	29.9563	13.2666	0	1.67166	0	3.15292	0
Smp_041960	Chr_4	22046416	7607	Chr_4	Sjp_0000870	SJC_S000001	1241828	14.496	Aut_Shared	Aut_Shared	0	0	0	0	0	0	0.00794509	0	0	0	0	0	0	0	0	0.00461737	0.0188501	0	0	0	0	0	0	0	0	0	0	0	0.0446894	0	0	0	0	0	0	0	0	0	0
Smp_041980	Chr_4	22078018	634	Chr_4	Sjp_0000880	SJC_S000001	1265396	0.534	Aut_Shared	Aut_Shared	1268.26	1190.9	1084.3	1343.84	1220.87	883.092	2923.3	6738.91	3495.07	870.389	864.815	923.28	1721.86	2406.36	3354.81	1960.26	311.438	666.244	701.577	261.858	669.409	289.192	1181.69	1402.95	1070.69	1160.36	1107.67	898.037	4199	1137.28	17735.6	1129.21	5671.76	1290.93	177.254	1134.5	1331.8	281.825	622.548
Smp_042030	Chr_4	22265806	10584	Chr_4	Sjp_0000940	SJC_S000001	1435173	7.744	Aut_Shared	Aut_Shared	1.53381	3.34174	4.08642	2.82564	3.16551	3.43626	4.26838	3.43519	3.2711	3.58525	3.36578	4.2995	10.4176	8.59705	5.27372	6.30539	5.05343	5.10254	3.28463	5.45419	2.98947	6.0135	10.6393	17.9546	22.4256	20.4393	29.0719	24.3528	32.3174	24.0703	43.7893	24.2484	25.9099	30.473	6.09506	3.38966	3.58784	4.82853	2.55243
Smp_042050	Chr_4	22328762	24987	Chr_4	Sjp_0000960	SJC_S000001	1486695	12.228	Aut_Shared	Aut_Shared	4.57423	5.25938	4.15802	4.41634	4.62246	3.62698	3.07992	0.817196	3.11929	3.48078	2.92952	2.81897	2.66117	2.9841	1.37635	1.72058	2.15201	2.96632	2.79503	2.4199	4.50796	1.94839	31.9306	32.3467	36.3486	28.8234	30.2395	24.8007	21.1772	22.7857	11.053	19.5923	25.5869	19.0941	2.43341	21.1717	17.5912	12.5583	20.4841
Smp_042090	Chr_4	22427799	8915	Chr_4	Sjp_0102800	SJC_S004069	45429	0.499	Aut_Shared	Aut_Shared	1016.18	879.062	787.542	1162.62	1046.66	711.324	2107.49	3514.73	2328.16	598.125	602.16	619.618	146.01	168.898	182.615	132.003	34.2438	136.919	147.765	35.3541	116.79	56.7137	869.742	1003.79	742.499	885.724	717.806	622.566	1769.79	455.928	5400.57	474.308	2198.53	514.595	36.488	65.1158	65.9873	16.2071	39.3558
Smp_042110	Chr_4	22479076	2183	Chr_4	Sjp_0102780	SJC_S004069	7281	3.268	Aut_Shared	Aut_Shared	45.4653	53.2358	54.0486	42.8356	45.6268	44.3622	55.5772	45.9899	48.0227	40.7155	39.3059	42.8707	100.653	103.928	105.792	78.6315	32.9087	44.5555	38.5331	25.0928	43.289	31.304	164.554	150.126	181.514	150.731	196.953	153.31	231.283	151.596	343.8	148.688	214.118	172.039	17.2177	25.0545	27.357	19.3756	41.4136
Smp_042160	Chr_4	22686384	4220	Chr_4	Sjp_0031630	SJC_S000203	86734	2.777	Aut_Shared	Aut_Shared	854.198	1210.71	1638.14	895.499	999.322	1531.56	755.565	734.213	554.231	1931.76	2087.52	2447.44	340.183	216.434	463.77	559.592	2239.41	404.165	482.661	2257.3	521.844	1932.96	1351.34	1462.71	1953.01	1565.92	2723.78	2493.71	1445.32	3335.45	2533.86	3701.69	1170.39	4607.69	1155.56	393.602	539.029	2361.8	293.366
Smp_042210	Chr_4	22839803	5512	Chr_4	Sjp_0088650	SJC_S002137	17397	3.521	Aut_Shared	Aut_Shared	4.66145	3.20186	2.40671	4.14309	3.62492	2.31272	5.98594	4.44879	7.19437	1.56218	1.63237	1.63166	6.44092	7.81252	2.55018	2.70187	1.87305	2.44944	1.97096	2.48447	2.06651	1.49908	8.61477	7.93054	7.12869	7.74579	5.22108	4.32603	16.5415	3.54213	21.3656	4.49024	20.5926	4.00579	0	8.06182	7.40662	0	0
Smp_042230	SC_0191	474045	7016	Chr_UP	Sjp_0003500	SJC_S000008	749883	14.894	n.a.	n.a.	2.85646	2.20199	2.05358	1.89296	1.87712	1.71831	2.22704	1.44157	2.20906	1.73222	2.38719	1.95495	3.15234	2.9672	1.38592	1.47686	1.26715	1.84582	2.34479	1.68162	2.82612	1.52786	15.6139	9.85949	11.8495	10.0157	10.882	8.91367	12.8641	9.19222	14.6541	12.699	13.9007	11.5818	5.85341	8.72398	8.19972	6.39296	19.9158
Smp_042280	SC_0191	300263	3216	Chr_UP	Sjp_0003440	SJC_S000008	641818	0.522	n.a.	n.a.	63.2987	66.7551	57.8329	58.3104	60.9331	58.2205	139.442	156.766	114.068	97.0932	77.0748	97.302	30.7395	39.4536	20.7827	13.6194	8.64993	11.6521	10.8099	10.7438	10.7567	7.84684	43.3221	44.2772	49.4815	47.6043	39.3918	46.7098	112.454	81.1355	257.729	66.3216	115.959	81.9118	5.06397	6.80086	5.62262	4.57972	5.67088
Smp_042340	SC_0191	67385	43727	Chr_UP	Sjp_0003360	SJC_S000008	508156	27.277	n.a.	n.a.	2.21684	1.47475	1.39314	1.9438	1.55972	1.06619	0.299784	0.0495055	0.192139	0.720184	1.03396	0.741955	1.4555	0.94297	0.428357	0.637792	1.52158	0.0882183	0.134872	1.02145	0.115775	1.18487	14.4561	12.9992	9.74429	9.96463	9.70156	7.0298	2.43501	5.19681	0.741573	7.39845	1.68423	5.52421	2.86568	0.303759	0.397502	5.05174	0
Smp_042390	Chr_4	18953087	2262	Chr_4	Sjp_0003310	SJC_S000008	295657	4.306	n.a.	n.a.	4.76457	7.31893	7.07236	5.14683	6.96325	6.82146	6.28551	7.27551	4.46282	5.80909	6.736	5.54906	37.3557	37.4116	36.3805	30.1088	4.31066	21.926	22.7789	6.33353	25.1782	7.10841	24.4704	25.5276	36.6335	35.1243	35.629	34.1629	36.3071	29.2211	71.8719	32.4703	25.2412	28.0537	0	32.1283	31.2314	4.34166	0
Smp_042400	Chr_4	18964901	792	Chr_4	Sjp_0061480	SJC_S000708	172550	0.512	Aut_Shared	Aut_Shared	203.306	209.682	199.386	213.689	179.247	185.173	610.502	896.196	635.218	206.164	186.661	201.975	283.854	333.392	320.115	258.731	81.4731	268.927	222.608	62.5133	264.204	96.7167	162.035	168.491	146.549	130.758	165.336	150.517	480.891	147.421	1277.94	129.506	566.018	153.689	45.943	212.003	158.224	42.8707	78.9665
Smp_042420	Chr_4	18987112	13462	Chr_4	Sjp_0061510	SJC_S000708	198831	10.655	Aut_Shared	Aut_Shared	3.95235	3.89563	3.85229	3.2253	3.61264	2.87958	4.51825	3.43452	4.53622	2.90073	2.58422	2.81849	2.92132	3.07653	2.02751	1.94642	1.13973	1.35087	1.03758	1.04856	1.41022	1.45984	25.6519	19.977	23.7378	22.3869	26.6054	18.587	33.5143	19.9303	44.8196	18.1501	37.621	19.9397	0	5.85056	9.63549	7.507	0
Smp_042430	Chr_4	19001255	5828	Chr_4	Sjp_0061520	SJC_S000708	209703	6.353	Aut_Shared	Aut_Shared	4.28317	2.98448	2.89699	2.75987	3.2846	2.47198	4.87664	4.61244	5.13309	2.30881	2.48267	2.56906	3.28109	5.14148	2.73974	2.60359	1.32862	1.84385	1.65105	1.0845	2.8955	1.2262	41.1121	29.4568	27.8484	27.7731	29.9387	26.7514	47.5092	17.4179	78.7745	21.8792	54.8509	22.8864	9.55633	0	5.39954	0	16.4441
Smp_042530	Chr_ZW	46192836	25798	Chr_PSA	Sjp_0016340	SJC_S000077	641734	19.083	PSA_shared	PSA_shared	0.735598	0.577349	0.423247	0.558629	0.488355	0.640078	0.241413	0.0141525	0.175465	0.494122	0.518324	0.533692	0.131463	0.158838	0.0925754	0.0435684	0.450221	0.0640834	0.0601592	0.620665	0.0654119	0.372233	4.21399	2.97008	2.7483	2.78002	2.38043	3.2853	1.60341	3.29747	0.155372	3.44151	1.63437	3.68972	0	1.09562	0	2.80366	0
Smp_042550	Chr_ZW	46123884	18947	Chr_PSA	Sjp_0016370	SJC_S000077	709912	18.967	PSA_shared	PSA_shared	7.49206	6.91652	7.69296	7.44711	7.41285	8.19557	7.88783	3.71639	6.54727	9.56312	9.3728	9.83042	8.11778	7.7356	4.43334	5.14806	10.8602	13.1901	12.2868	12.0425	13.4264	10.8555	73.1154	72.2703	70.4871	70.1236	77.5164	83.1911	81.416	91.2954	69.3485	89.845	73.1856	100.564	18.4265	24.2075	21.9564	17.9766	13.8963
Smp_042560	Chr_ZW	46107827	1214	Chr_PSA	Sjp_0016380	SJC_S000077	741713	0.956	PSA_shared	PSA_shared	158.808	151.696	152.766	205.853	168.898	120.467	263.233	337.025	204.364	86.989	91.5798	86.1815	146.102	130.073	208.446	207.65	60.4753	96.0068	95.8806	57.2697	90.6995	77.0776	95.3539	128.163	93.5612	103.524	98.0814	73.0782	183.231	55.8109	418.533	57.6926	151.931	61.3481	51.5663	80.7552	69.4284	33.2204	127.146
Smp_042590	Chr_ZW	45929236	4425	Chr_PSA	Sjp_0063950	SJC_S000776	39867	3.781	PSA_shared	PSA_shared	72.2533	88.0953	96.2322	76.3105	83.6413	83.9551	92.0523	121.179	69.7688	75.9246	82.0865	84.2954	53.7729	44.4911	42.5299	41.6491	62.4771	42.0934	35.4239	65.276	28.697	62.0256	316.349	320.034	374.6	347.557	433.216	358.409	417.9	315.091	999.849	351.12	356.183	381.547	41.8055	172.284	184.521	257.287	0
Smp_042650	Chr_ZW	45770760	9422	Chr_PSA	Sjp_0100440	SJC_S003759	8105	17.722	PSA_shared	PSA_shared	7.27504	7.40242	6.55235	8.5639	8.09366	7.86055	8.90338	7.29204	7.993	7.90714	7.66297	8.3844	1.7385	1.47947	1.07547	1.90123	1.00445	0.818833	1.38364	1.34165	2.05967	1.77767	53.1568	63.1674	53.0043	55.7256	48.951	56.2611	65.038	53.2156	97.0129	50.7381	64.7454	59.4465	0	2.16915	12.8322	8.34171	0
Smp_042680	Chr_3	22522552	10677	Chr_3	Sjp_0058160	SJC_S000630	48139	9.496	Aut_Shared	Aut_Shared	16.3971	20.5873	20.5945	25.8792	31.2125	34.9901	117.634	171.511	116.883	46.6011	60.9486	57.8737	21.7079	21.6053	24.9598	20.7943	9.25331	14.8904	14.7393	9.76755	12.723	11.734	156.636	262.409	202.679	306.428	213.81	351.134	1360.51	493.332	3564.49	649.518	1492.18	657.604	22.3304	115.873	104.639	50.9303	0
Smp_042690	Chr_3	22521626	564	Chr_3	Sjp_0058150	SJC_S000630	47169	0.312	Aut_Shared	Aut_Shared	167.508	203.664	204.976	194.666	219.476	247.946	241.787	235.447	202.509	368.543	388.57	392.965	471.978	392.659	422.301	359.837	253.988	148.517	167.306	291.37	169.049	276.777	162.546	185.313	208.031	216.514	198.358	237.105	281.951	424.477	558.973	463.887	275.234	477.286	470.476	186.439	163.988	268.729	308.447
Smp_042740	Chr_4	12004746	1702	Chr_4	Sjp_0114990	SJC_S008444	7901	1.729	Aut_Shared	Aut_Shared	11.4912	11.1143	9.5725	6.40898	8.55366	11.0173	7.7936	6.95096	6.65184	10.8315	11.9053	14.8014	21.1348	13.8006	16.4376	20.7815	21.9891	12.4655	8.20675	27.6042	11.8977	21.5187	9.2589	5.19931	8.49374	6.75512	7.58673	9.73611	7.55511	9.22458	12.6048	10.9282	7.91861	13.0845	14.5171	8.48154	7.08238	17.7765	12.2647
Smp_042790	Chr_4	12124030	7872	Chr_4	Sjp_0062550	SJC_S000727	334272	8.164	Aut_Shared	Aut_Shared	5.42281	6.0258	5.12501	4.91383	4.39233	4.7022	14.3471	18.5087	15.2109	6.68931	6.18878	6.41334	4.48704	5.41458	3.18989	2.65039	3.67954	6.16038	7.53124	2.99752	4.98403	2.89366	61.4066	60.5186	68.4475	55.513	70.7204	54.6262	135.088	53.6435	317.11	51.5017	157.497	61.7567	0	19.3296	33.9222	9.91646	0
Smp_042910	Chr_ZW.unplaced.SC_0115	1047962	2405	Chr_UP	Sjp_0040920	SJC_S000317	44267	1.588	n.a.	n.a.	14.6875	17.103	16.9261	14.0444	12.6302	13.0028	18.9294	13.9458	20.0772	11.051	10.774	13.0734	24.4381	20.2482	8.10037	12.341	48.2348	46.2857	42.4619	58.5182	53.1509	52.5574	28.4406	31.4154	30.9934	26.1045	41.4702	28.4885	46.6785	24.2749	58.4335	22.7174	58.956	31.1019	24.0372	42.5722	39.1227	50.1761	40.6623
Smp_042920	Chr_ZW.unplaced.SC_0115	1052734	8749	Chr_UP	Sjp_0040930	SJC_S000317	47459	5.292	n.a.	n.a.	22.9754	23.2885	17.9145	17.7587	18.5672	19.0146	18.5642	14.0344	16.8911	17.4221	13.614	17.0984	3.9589	4.85927	3.22111	2.87049	3.34348	3.71624	3.05111	3.75661	5.35239	3.16516	88.8203	72.0533	91.0889	74.6738	73.7244	82.3055	127.782	104.691	180.236	88.0731	125.442	108.778	3.49954	1.97788	4.20454	1.26495	3.91278
Smp_042980	Chr_4	12678658	1277	Chr_4	Sjp_0034900	SJC_S000241	61443	1.175	Aut_Shared	Aut_Shared	41.7217	56.2598	52.0612	29.8441	42.9325	50.7395	70.6715	69.2994	57.7375	40.4592	44.8203	49.4498	76.9906	106.322	53.3545	44.0085	13.3624	21.3611	19.6885	14.0235	14.2056	10.318	25.258	18.1364	35.2246	27.1106	33.5927	32.9241	50.4927	25.742	91.8455	29.7583	46.6789	34.9325	4.4271	10.3541	17.3094	8.44311	7.49867
Smp_042990	Chr_4	12690215	27436	Chr_4	Sjp_0034890	SJC_S000241	30362	14.804	Aut_Shared	Aut_Shared	2.12984	1.69615	2.11078	1.98974	1.61483	2.18059	1.68821	0.848308	2.12415	2.89279	3.47615	2.76945	1.0836	0.832123	0.450165	0.458321	1.15504	0.93399	1.13135	1.49742	1.55304	1.3105	30.5221	27.1499	25.6588	24.1113	29.557	30.2668	26.8617	45.3642	25.0902	47.4022	36.2896	41.1344	13.392	3.28123	4.40329	2.86137	4.80996
Smp_043010	Chr_4	12740263	12608	Chr_4	Sjp_0114770	SJC_S008408	278	5.067	Aut_Shared	Aut_Shared	17.0484	12.4394	10.7922	11.9865	13.4742	10.5321	7.7736	1.78556	9.4814	7.13357	6.62124	4.79297	3.0219	3.04986	1.31244	1.68545	2.99114	3.27812	2.85581	2.07207	6.69217	2.10782	23.7966	17.5014	19.0039	19.5668	15.5457	14.5224	12.5431	10.6813	5.18081	10.1799	17.0853	7.54504	0	8.24207	5.3995	7.9123	0
Smp_043030	Chr_4	12796723	6254	Chr_4	Sjp_0124190	SJC_S017304	36	1.28	Aut_Shared	Aut_Shared	93.8077	104.29	107.994	124.378	120.29	135.983	75.1318	54.3309	67.5594	103.133	94.4006	86.9105	60.0039	50.9488	63.6044	66.7834	161.896	58.2003	97.6258	200.779	70.4248	228.965	243.383	324.67	281.426	306.409	288.771	352.376	272.586	353.564	369.619	305.722	280.632	296.206	242.216	95.8899	152.638	283.606	65.4835
Smp_043070	Chr_4	12934416	5306	Chr_4	Sjp_0086600	SJC_S001889	1216	4.572	Aut_Shared	Aut_Shared	17.5716	13.3379	12.8584	16.2295	13.7809	12.3085	16.0969	14.9449	13.6285	11.0282	11.0802	12.4801	7.37096	6.34372	5.69062	4.89861	5.7022	6.80275	6.02543	6.19422	8.905	5.26109	59.6368	53.5141	43.2615	46.7193	48.5551	42.7091	65.6966	38.9209	109.13	37.3393	60.1078	49.2386	5.67456	15.7039	41.3192	18.5878	9.64836
Smp_043130	Chr_4	13222994	5966	Chr_4	Sjp_0061590	SJC_S000710	145149	2.836	Aut_Shared	Aut_Shared	18.8089	18.1596	15.9206	11.5241	13.43	12.5108	22.8638	30.2355	19.6095	12.7453	11.2173	12.2927	13.0566	16.4045	9.1557	6.82352	6.92208	7.52809	7.28388	5.75617	8.62699	6.85016	64.6529	39.2473	58.6534	46.2023	54.1117	39.2979	65.9414	34.2924	160.463	29.7607	57.4938	33.6991	6.77929	15.892	15.2263	14.8294	11.5658
Smp_043170	Chr_4	13344466	32853	Chr_4	Sjp_0013890	SJC_S000060	306751	35.183	Aut_Shared	Aut_Shared	3.54174	3.48834	3.5037	3.321	3.43192	3.52133	2.76285	0.683183	2.37927	4.30674	4.23602	3.68147	2.15799	1.5747	1.73223	1.9191	3.60086	1.09869	1.09598	3.16156	1.90051	2.78023	56.7826	54.6587	55.88	51.2978	59.7498	58.5527	41.6213	60.9455	19.5184	60.0169	40.9935	55.4511	6.64298	4.58482	4.43451	7.2983	3.60708
Smp_043200	Chr_4	13417179	8120	Chr_4	Sjp_0013910	SJC_S000060	369669	10.7	Aut_Shared	Aut_Shared	12.8163	13.8168	12.1641	13.1484	13.4999	10.9535	15.3706	8.63221	12.8847	11.5296	11.4802	10.5066	6.98932	8.5294	4.48744	6.28085	3.53184	8.85655	7.64526	4.30707	6.49437	5.74808	60.2875	61.2833	67.948	62.6716	61.9932	51.2741	74.6945	51.464	71.2655	50.7281	66.0721	48.7265	18.6318	24.5443	24.9375	13.184	18.8948
Smp_043210	Chr_4	13449513	22696	Chr_4	Sjp_0013920	SJC_S000060	397449	18.441	Aut_Shared	Aut_Shared	2.1548	2.44537	2.67815	2.58614	2.83439	3.41431	2.15467	1.64758	1.65785	2.91881	3.22546	3.29947	4.14751	2.86297	3.53717	3.70495	5.35132	2.54947	3.25496	5.33762	2.73244	5.95304	93.0883	119.436	129.689	139.742	131.988	164.714	134.336	168.768	198.107	196.875	118.096	208.937	11.6374	14.8381	23.8047	39.0713	13.1191
Smp_043220	Chr_4	13494174	7177	Chr_4	Sjp_0013940	SJC_S000060	438764	12.108	Aut_Shared	Aut_Shared	8.24031	10.0305	9.79819	9.58054	11.7292	16.261	6.65844	6.70273	6.90159	30.7938	31.1752	36.8912	29.1623	41.2512	24.6579	19.8207	71.7263	23.6493	29.7553	79.318	22.8072	92.6336	120.57	139.804	135.463	163.378	149.326	236.385	124.854	515.783	225.362	514.294	141.271	669.588	55.3897	56.6375	67.2149	142.262	25.439
Smp_043350	Chr_4	13712773	12376	Chr_4	Sjp_0039630	SJC_S000299	95324	17.425	Aut_Shared	Aut_Shared	4.42455	5.63174	4.86315	5.05526	5.62726	6.7845	5.70407	4.09952	5.1215	6.79429	6.92678	6.71395	5.44285	4.13877	3.80712	4.94965	2.81548	4.27466	4.31386	3.33661	4.05648	3.06762	28.847	37.0777	40.9326	40.3895	36.7415	48.6575	42.1594	46.0448	52.726	46.5808	42.2493	47.4509	10.8018	22.1832	16.0594	14.6961	24.3336
Smp_043360	Chr_4	13750385	5863	Chr_4	Sjp_0039640	SJC_S000299	137909	4.127	Aut_Shared	Aut_Shared	0.313972	0.124169	0.0320831	0.135951	0.0490896	0.0704686	0.0837209	0.0327201	0	0.158666	0.129551	0.0316379	0.713839	1.01092	0.029096	0.113826	0.195658	0.328972	0	0.539015	0.0719553	0.914164	0	1.4816	2.70277	0	0	0.774526	1.25431	2.60918	1.33698	2.01916	0	0.697807	0	0.991391	0	0	0
Smp_043390	Chr_ZW	17810791	17943	Chr_Z	Sjp_0111210	SJC_S007484	274	1.566	S0	S0	6.20575	3.59954	2.11377	2.59754	1.81118	4.08565	1.47091	0.862299	4.83416	12.5443	9.21825	11.5895	1.93639	1.31111	0.783404	1.92819	13.282	8.04668	11.7288	19.2918	8.98155	15.1844	9.53906	5.95262	6.20508	3.5818	3.63899	8.29813	3.83956	27.4551	4.09263	19.3151	14.126	24.5646	18.7833	36.3039	52.7647	57.2249	14.0399
Smp_043430	Chr_ZW	17752755	2573	Chr_Z	Sjp_0087550	SJC_S001983	17181	2.076	S0	S0	1.24833	1.23421	0.956697	1.41889	0.975881	0.840532	2.10816	0.390278	1.12202	3.46964	4.44261	5.53475	0.280448	0.199073	0.34476	0.12286	5.62871	1.60632	0.603182	4.01223	1.96754	1.6491	1.58956	2.42471	2.2116	0.486331	1.88136	0.905388	4.10546	5.03254	1.87546	8.81184	2.6715	11.7462	0	6.74237	2.22366	6.49172	0
Smp_043600	Chr_5	4490305	5479	Chr_5	Sjp_0047410	SJC_S000419	9663	24.057	Aut_Shared	Aut_Shared	4.15636	3.09933	3.08768	3.71994	3.37697	2.86508	3.27941	3.08163	3.50386	2.34086	2.35581	2.34469	20.5652	26.5235	12.8838	14.0202	4.05656	7.34229	6.79826	4.076	14.1677	3.62762	66.0564	62.0251	50.1763	49.8174	51.8804	48.313	53.674	35.7236	81.9085	37.1103	59.3981	39.382	4.97628	14.8207	15.3061	2.71384	25.3291
Smp_043610	Chr_5	4502551	13607	Chr_5	Sjp_0065150	SJC_S000809	18068	12.778	Aut_Shared	Aut_Shared	8.50117	8.28139	7.65759	7.34379	8.98969	6.60032	8.85107	5.38961	7.5651	5.52426	4.89553	3.94427	7.74783	6.44241	4.91197	5.73832	3.59351	5.9939	5.56603	3.82441	7.96808	3.38094	39.2009	35.3319	39.3292	40.2236	36.498	30.8646	44.7198	24.4075	48.1394	23.442	41.3709	19.1586	8.02026	22.6979	21.5677	15.9813	27.025
Smp_043650	Chr_5	4647701	20150	Chr_5	Sjp_0065180	SJC_S000809	162652	5.948	Aut_Shared	Aut_Shared	3.52188	4.91078	7.27926	2.73554	3.13358	4.98723	3.00129	2.52001	1.78674	3.94122	4.65174	4.03915	0.814702	0.548347	0.726383	0.385235	7.87059	0.875155	0.801026	6.9217	1.17245	6.58331	48.2207	16.6891	16.9137	26.0352	54.9365	21.3264	72.2139	132.257	130.521	131.411	57.2064	104.803	27.7935	7.40503	3.90301	34.2073	0
Smp_043670	Chr_5	4692516	51205	Chr_5	Sjp_0065200	SJC_S000809	211058	37.338	Aut_Shared	Aut_Shared	11.3307	13.347	15.8159	13.5354	13.5594	16.3841	7.34438	2.67627	7.7942	18.8458	19.6498	15.9182	4.51797	2.41149	3.56405	4.78591	17.6451	5.33801	4.73431	17.141	5.08342	15.3912	155.133	171.014	170.566	167.772	212.517	206.719	70.4765	181.716	42.1505	192.639	87.5577	168.108	18.1684	7.69258	2.51217	36.875	30.3636
Smp_043820	SC_0261	102991	1116	Chr_UP	Sjp_0112360	SJC_S007772	932	0.986	n.a.	n.a.	45.1195	49.6332	49.5518	34.4267	29.5876	33.1822	26.8657	19.3104	28.3487	27.0958	27.5192	33.9005	18.4601	37.7342	9.81351	8.37193	2.69825	2.22207	2.22507	2.26541	3.02419	2.20121	64.7844	45.8032	70.9646	43.6062	70.0164	41.9842	43.8227	39.2259	62.8478	39.3341	48.3912	54.0788	0	2.14116	5.66393	5.50388	34.5135
Smp_043860	Chr_2	9134050	3249	Chr_2	Sjp_0087220	SJC_S001941	11142	1.28	Aut_Shared	Aut_Shared	3.88054	5.80503	6.5169	4.60252	4.27344	3.86251	0.809803	0.105497	0.341209	4.60417	5.84783	3.46826	0.0222097	0.0337828	0	0.0216216	0.441344	0.0848068	0.0955363	0.453918	0.389542	0.48115	2.17496	3.02146	3.40435	2.37062	4.03686	2.22988	0.601866	3.44296	0	3.55253	0.210886	2.26013	5.57985	0	0	1.52291	0
Smp_043930	SC_0194	84164	743	Chr_UP	Sjp_0014920	SJC_S000066	445197	4.548	n.a.	n.a.	6.55288	8.73228	8.8213	7.1244	8.55274	7.80135	9.72429	9.76844	8.7388	7.28532	7.78828	7.95247	82.3082	105.673	82.6547	68.1686	40.9142	21.509	25.9013	26.3708	31.2289	31.5597	23.0107	27.498	29.5073	29.7505	33.8639	28.9189	48.3392	31.4766	88.7463	35.8583	47.2137	36.2629	8.37595	3.57557	16.5192	9.18278	14.3603
Smp_043940	SC_0194	95292	5106	Chr_UP	Sjp_0014900	SJC_S000066	416508	11.501	n.a.	n.a.	5.23893	4.52248	4.43237	5.90292	6.25341	6.85273	12.5577	12.117	13.2026	12.2297	12.0171	13.7938	12.4223	13.6502	9.94273	9.56185	32.5484	39.5552	37.6902	27.5217	42.3031	29.8288	55.7045	71.4397	51.9109	71.2453	56.3996	85.5108	146.23	131.591	248.169	124.931	165.517	150.145	0	63.6946	18.5867	27.7796	67.0429
Smp_043970	SC_0194	137065	4737	Chr_UP	Sjp_0014880	SJC_S000066	364406	10.745	n.a.	n.a.	7.27572	6.46218	6.12436	7.93696	7.3533	6.79356	12.1657	7.55297	9.5926	11.7373	11.0962	11.6899	15.3017	16.7216	12.8636	15.5194	22.4004	16.6358	14.3502	15.7	24.7585	17.4434	85.5131	88.817	79.0497	82.4368	77.5826	81.2743	139.741	120.294	150.743	112.702	118.533	131.18	24.9888	59.8787	35.0363	61.4445	74.4846
Smp_044250	Chr_3	9205728	2291	Chr_3	Sjp_0090150	SJC_S002272	6717	1.088	Aut_Shared	Aut_Shared	84.3595	103.619	107.215	101.72	108.372	107.322	104.375	77.0748	61.2839	107.25	118.062	108.608	38.2372	48.7876	19.1067	20.9121	56.0803	36.6822	43.6264	43.5896	49.9031	37.0417	53.0299	64.8784	62.6997	64.5279	66.7102	64.7251	70.2709	63.9301	89.0251	71.5441	44.1903	71.3762	16.3515	33.7041	31.1682	36.7947	19.6576
Smp_044260	Chr_3	9183675	15431	Chr_3	Sjp_0084550	SJC_S001774	17667	0.44	Aut_Shared	Aut_Shared	172.277	190.419	195.902	153.338	186.017	210.186	194.484	195.188	144.59	179.776	197.459	203.57	3.66385	3.52092	2.14467	2.05315	2.17445	1.76775	1.36783	2.38932	2.02312	1.64985	106.986	102.362	122.272	117.122	129.864	136.349	136.619	112.586	272.839	121.464	112.812	142.059	3.96728	28.3795	11.5882	22.097	17.6567
Smp_044280	Chr_2	27478805	1260	Chr_2	Sjp_0009930	SJC_S000034	501758	1.107	Aut_Shared	Aut_Shared	57.7455	55.0866	42.1023	63.1013	62.4067	39.2757	137.749	174.193	125.33	42.7079	38.1554	35.0309	157.261	146.144	228.834	230.315	52.9187	282.972	295.124	75.7456	135.268	121.764	44.8364	50.1059	42.3728	50.4713	34.9534	32.1491	115.646	31.8479	263.505	29.0426	114.705	28.7563	110.024	253.214	288.087	66.8232	305.487
Smp_044400	Chr_2	27837577	1879	Chr_2	Sjp_0056360	SJC_S000587	119395	4.349	Aut_Shared	Aut_Shared	4.36986	6.245	7.61134	4.48314	6.66148	5.98499	5.05814	4.44014	3.95005	5.02893	5.00973	5.28404	20.7376	16.4728	19.7917	22.7869	6.94451	11.1447	13.0502	4.37288	11.4505	7.13111	10.4849	10.472	15.8036	16.0395	18.8966	14.4324	14.4266	12.4901	21.4769	13.2336	11.8606	14.5273	10.237	18.5134	14.3169	11.168	0
Smp_044440	Chr_ZW	14107133	9443	Chr_Z	Sjp_0101110	SJC_S003853	2382	1.689	n.a.	n.a.	20.8416	24.4238	21.8718	29.8141	35.6247	30.9937	19.5704	22.2262	17.3251	23.8819	26.907	26.2067	9.27304	10.3449	22.7911	24.1143	8.15439	6.47774	7.46164	14.1675	4.95902	14.9229	57.6221	81.1651	80.7617	109.05	57.1424	81.2058	79.2342	93.6949	175.222	107.262	76.4912	111.206	55.0197	45.8251	58.9227	87.463	0
Smp_044470	Chr_ZW	13912491	25484	Chr_Z	Sjp_0074230	SJC_S001151	33869	3.243	S0	S0	7.85794	11.6931	13.5959	16.3926	20.303	24.6165	14.9159	20.3199	14.455	35.2546	38.3724	44.6103	1.4809	1.54335	1.95465	2.1074	1.77243	0.691979	0.682085	2.29003	0.744951	2.07689	35.6286	73.7086	50.5572	84.032	64.6368	108.506	60.6536	130.324	148.991	141.704	65.0685	186.074	31.6796	5.28677	5.02417	14.4232	27.5425
Smp_044580	Chr_ZW	13135095	607	Chr_Z	Sjp_0132810	SJC_S026585	903	0.243	n.a.	S1_mans	603.444	538.804	509.467	607.826	601.943	445.212	1963.61	4535.1	2388.63	637.03	644.12	696.909	1185.16	1350.64	2200.19	1489.57	530.104	1279.18	1285.57	709.797	651.229	815.293	14.5733	0	0	11.1626	0	0	134.897	97.9327	285.991	42.5044	157.815	17.4521	286.215	2018.08	2139.14	831.475	315.823
Smp_044680	SC_0062	1048509	6743	Chr_UP	Sjp_0099500	SJC_S003645	22388	4.975	n.a.	n.a.	64.723	66.0254	68.2927	74.7153	64.4632	67.0795	76.9743	61.2616	69.8504	90.1868	90.8382	106.949	34.6617	26.7279	29.7919	37.2652	39.7025	28.3587	26.6989	47.4919	25.4639	54.0836	119.576	140.179	119.31	113.95	133.065	124.335	161.107	173.307	229.949	175.613	158.994	214.955	79.6592	68.3085	66.5384	97.4605	15.5041
Smp_044770	Chr_2	9285933	1771	Chr_2	Sjp_0005260	SJC_S000016	578302	0.736	Aut_Shared	Aut_Shared	159.916	193.559	194.293	146.747	166.534	154.5	168.376	219.984	133.319	133.454	127.308	126.667	151.204	168.72	166.352	152.238	63.3163	67.3674	68.5293	67.5708	68.367	68.346	104.548	92.2598	123.053	101.723	128.998	101.497	146.241	107.635	341.069	100.522	126.62	105.228	75.6104	50.1755	48.2539	52.2562	53.1554
Smp_044800	Chr_2	9340232	31559	Chr_2	Sjp_0005220	SJC_S000016	493865	24.583	Aut_Shared	Aut_Shared	0.149344	0.104227	0.0807917	0.0513528	0.107135	0.141963	0.0281102	0.00549307	0.0296104	0.149167	0.163118	0.223078	0.460727	0.432424	0.138379	0.219256	0.2499	0.148425	0.0688483	0.0934618	0.106942	0.134451	1.1	0.338409	0.694498	0.772086	0.626601	0.840308	0.179058	1.30365	0.0763441	1.38357	0.250958	1.79307	0	0.182848	0.478213	0.467684	0
Smp_044810	Chr_2	9375390	10739	Chr_2	Sjp_0019740	SJC_S000104	371168	12.073	Aut_Shared	Aut_Shared	16.3316	16.0019	15.0579	17.5901	18.9789	15.4289	15.4351	7.8071	15.459	14.0476	13.5735	12.8915	13.3413	9.83914	11.9996	17.2465	8.30527	9.49332	7.34155	6.80762	14.0245	9.06683	65.0307	70.7727	63.5106	73.2865	61.8955	61.7919	64.4563	52.3902	58.8898	51.3951	70.8919	52.2561	10.0205	24.4554	25.079	19.7351	4.21849
Smp_044820	Chr_2	9389032	1956	Chr_2	Sjp_0019750	SJC_S000104	383914	17.809	Aut_Shared	Aut_Shared	1.13989	1.16536	0.855005	0.866383	0.898694	0.906324	0.497964	0.0682421	0.588576	0.860389	0.840611	0.806484	7.41514	11.6157	2.23267	2.17282	12.3892	5.77558	5.87153	6.35496	7.11751	6.85039	27.5825	19.6346	25.9497	20.2535	21.3682	20.9474	13.9086	20.6407	4.33912	22.2077	17.354	20.9485	29.7461	10.5989	2.80334	10.8973	0
Smp_044850	Chr_2	9524835	7388	Chr_2	Sjp_0048490	SJC_S000436	67535	6.052	Aut_Shared	Aut_Shared	4.78167	5.67312	4.57254	3.1289	4.41875	4.82945	3.67287	3.50308	3.58424	4.13317	4.61598	4.07761	8.76597	11.3256	3.20953	2.78123	5.9003	4.92297	6.134	3.30796	5.59606	6.25714	16.3362	11.068	18.4193	13.2223	15.6279	16.8502	13.0687	14.191	24.531	15.7893	14.7453	15.2726	31.9251	7.33134	9.96157	6.49271	29.0165
Smp_044950	Chr_ZW	47750993	9536	Chr_UP	Sjp_0082890	SJC_S001689	1965	5.488	n.a.	n.a.	5.9027	6.0694	5.2596	8.30665	7.19855	7.20701	8.35249	5.41325	7.21547	7.42155	7.23367	6.87585	0	0	0	0	0	0	0	0	0	0	23.0685	35.9243	19.0115	29.2644	20.8256	26.2789	35.603	28.3935	46.469	27.7375	36.8062	27.7182	0	6.00942	4.82788	17.9567	0
Smp_044970	Chr_ZW	47678827	28082	Chr_UP	Sjp_0073030	SJC_S001066	1065	26.68	n.a.	n.a.	32.823	33.0553	33.9404	31.1816	31.5356	36.3257	24.092	13.0633	22.1484	38.636	37.5794	34.6147	17.057	13.3894	14.8782	20.2288	21.155	12.7162	11.6612	23.7902	12.9498	23.6667	176.736	164.807	180.581	163.285	190.273	193.256	142.194	203.347	140.056	201.088	143.46	194.102	61.5248	45.5185	36.904	60.3439	39.3922
Smp_045070	Chr_ZW	13732943	6265	Chr_PSA	Sjp_0064900	SJC_S000804	47708	5.312	PSA_shared	PSA_shared	14.026	14.3739	12.2636	15.6586	15.408	12.0173	19.2965	14.0578	15.8957	10.6506	9.71283	10.9873	10.5791	14.3135	9.71533	13.7582	7.30124	9.27986	9.46303	8.239	9.22534	7.55696	29.5985	33.6721	31.6724	31.3532	27.1328	25.4869	42.6111	21.2589	56.3395	19.5453	39.2594	23.6782	5.75161	18.3157	13.6064	6.25324	9.69624
Smp_045230	Chr_2	11795879	15801	Chr_2	Sjp_0083890	SJC_S001733	6841	10.432	Aut_Shared	Aut_Shared	7.51472	7.61396	6.27003	6.64226	6.50581	5.715	4.22842	1.43683	4.18662	5.10946	4.38203	3.96766	4.65809	6.1661	2.42913	2.46077	4.90953	2.45875	2.57339	3.60005	3.55099	3.98563	33.2432	29.5758	31.8947	30.0538	28.3194	26.1386	25.7302	27.3372	13.1233	24.273	25.1077	23.3187	3.39867	4.1406	3.06037	4.3744	0
Smp_045250	Chr_2	11771705	23170	Chr_2	Sjp_0050590	SJC_S000473	196474	24.512	Aut_Shared	Aut_Shared	2.49334	2.51915	2.15528	2.67236	2.5787	2.36698	3.58973	3.50922	3.02307	2.1211	1.99581	1.97623	5.11531	3.66815	4.0759	4.55691	2.01752	2.54488	2.82667	2.29142	3.44127	2.2072	36.5411	37.9719	38.2118	37.5444	34.6815	34.4817	53.1248	27.9412	96.0398	29.1543	50.6604	28.5473	8.61833	31.1475	28.8752	28.1716	21.8889
Smp_045300	Chr_2	11681872	19240	Chr_2	Sjp_0040430	SJC_S000312	234916	11.789	Aut_Shared	Aut_Shared	2.27153	5.28136	6.3682	4.66408	6.39279	6.20428	2.06135	0.916353	0.926177	5.37671	5.6577	5.19444	1.83774	1.06299	2.19178	1.53167	4.34501	0.501237	0.483988	2.87992	0.5701	3.35448	31.1187	69.2861	82.8277	99.3482	108.019	99.8749	42.6821	101.507	37.2478	114.113	22.739	106.645	28.6648	2.44098	3.21153	25.041	0
Smp_045310	Chr_2	11636916	33898	Chr_2	Sjp_0040450	SJC_S000312	277485	8.412	Aut_Shared	Aut_Shared	3.69689	4.66024	4.09246	2.65127	4.23875	3.83755	3.3407	2.5845	2.57867	2.92689	2.68537	2.49902	4.18187	3.18399	2.49106	2.87125	3.033	1.25178	1.45593	2.11317	1.14498	2.16748	13.3742	10.1885	17.7951	14.5076	17.1971	13.9008	13.6416	11.0708	19.3008	9.71624	12.0889	10.2778	5.25533	4.73446	1.09317	5.70009	6.61333
Smp_045330	Chr_2	11543713	958	Chr_2	Sjp_0099900	SJC_S003695	14057	6.479	Aut_Shared	Aut_Shared	0.899973	0.435012	0.245236	0.411341	0.281423	0.246879	0.0355524	0	0.11235	0.0808538	0.247565	0.141069	0.52726	0.0381908	0.320524	0.25665	0.149679	0	0	0.439839	0	0	2.72725	1.48577	1.26484	0.834413	0.684709	0.932041	0.167711	0.436085	0	1.07991	0.47011	0.653116	0	0	0	0	0
Smp_045360	Chr_2	11363317	67748	Chr_2	Sjp_0055460	SJC_S000571	32974	67.728	Aut_Shared	Aut_Shared	2.87297	2.7087	2.81908	2.90981	2.7071	2.99506	1.40632	0.269163	1.42083	3.89053	4.17603	3.47592	4.16566	2.91352	1.80743	2.6462	5.54327	0.752412	0.623104	4.92282	0.940293	5.38957	33.112	32.6338	30.5676	28.8035	34.2269	34.4287	17.8863	46.0668	6.15992	49.9947	19.4362	43.2963	0.00551411	2.92784	0.000125549	21.896	0.00125452
Smp_045430	SC_0037	2241519	4327	Chr_UP	Sjp_0094960	SJC_S002699	17205	4.309	n.a.	n.a.	14.6346	12.0708	11.6459	11.1654	11.9421	11.0012	16.8121	25.7913	14.7306	11.063	11.4153	11.3025	9.84748	15.0338	6.88353	5.72282	7.39001	12.5447	13.8449	14.8019	9.06732	16.206	60.5542	49.8993	51.5821	45.0714	49.9339	45.5626	86.6005	52.1393	250.059	50.4739	80.9165	57.3439	23.5231	18.5483	0	12.2994	0
Smp_045480	SC_0037	2079865	17011	Chr_UP	Sjp_0018410	SJC_S000090	284936	15.431	n.a.	n.a.	7.3055	6.80779	6.2724	6.77203	6.99773	7.01098	4.79168	2.27525	4.62287	7.2479	6.21937	5.66922	5.71386	5.38338	2.51107	3.89421	6.27991	3.62826	3.70411	6.16778	4.04241	8.3101	46.8521	44.9142	43.4318	46.3465	44.2269	45.7479	35.518	47.0838	29.2653	41.4498	37.1061	40.4285	0	0	0	0	0
Smp_045510	Chr_4	4641515	578	Chr_4	Sjp_0065660	SJC_S000825	47990	0.413	Aut_Shared	Aut_Shared	339.366	356.105	348.169	378.688	381.64	293.641	795.886	1293.14	715.223	425.55	453.1	471.379	0	0	0	0	0	0	0	0	0	0	504.704	508.617	471.52	493.35	449.34	362.401	1269.58	659.714	3934.03	723.996	1369.51	751.745	131.003	1009.27	955.949	990.528	182.048
Smp_045590	Chr_5	3591028	14853	Chr_5	Sjp_0034340	SJC_S000235	77564	17.656	Aut_Shared	Aut_Shared	7.37562	6.05146	6.52435	6.8084	6.99942	6.67103	4.5727	1.4455	4.7659	7.69192	7.80518	6.34509	7.06144	6.89219	3.01602	4.18333	4.53744	3.80294	3.67804	3.97167	4.06167	3.98441	22.6087	21.0909	18.6818	20.7516	20.4998	20.5173	15.3246	23.9328	9.14145	25.1973	18.4568	21.4833	1.40553	8.34293	10.1374	5.33642	23.5895
Smp_045600	Chr_5	3610297	14267	Chr_5	Sjp_0034350	SJC_S000235	98097	16.133	Aut_Shared	Aut_Shared	0.0401587	0.0158819	0.0164144	0.0521666	0.0251153	0.00901332	0	0	0.0360956	0.00811771	0.00828517	0	0.52348	0.553917	0.210443	0.233883	0.733698	0.309006	0.326345	0.398713	0.680108	0.313062	0.114181	0.298579	0.136168	0.104802	0.147427	0	0.252773	0	0	0.135637	0.354274	0.0703125	0	3.41674	2.24281	2.1886	0
Smp_045610	Chr_5	3674520	5828	Chr_UP	Sjp_0034360	SJC_S000235	179214	4.435	n.a.	n.a.	43.8251	44.0806	47.4097	56.0753	49.9744	55.1156	65.2079	77.0025	50.2235	73.3806	79.9275	86.1142	97.9932	101.612	86.5829	92.3671	88.9684	47.9873	47.3479	76.3129	60.8055	77.4425	221.271	294.804	230.595	273.161	258.345	296.272	366.829	379.792	786.777	406.459	307.538	473.799	36.4982	92.3506	76.2125	119.901	30.7804
Smp_045620	Chr_5	3690258	12522	Chr_5	Sjp_0047510	SJC_S000419	439503	3.258	Aut_Shared	Aut_Shared	8.08691	9.04405	8.81899	9.85919	9.01657	8.39087	9.7214	6.67305	8.93693	6.23059	8.4925	6.13173	9.73015	10.8486	6.20947	5.30708	5.03856	7.48144	6.84153	6.98239	8.01837	7.25861	21.3465	26.3786	22.0422	26.7614	28.0663	25.6221	37.1716	22.4778	48.8361	29.2233	38.3666	22.9239	24.9309	75.3121	52.982	48.947	25.3802
Smp_045650	Chr_5	3789703	13102	Chr_5	Sjp_0047480	SJC_S000419	333734	13.59	Aut_Shared	Aut_Shared	2.55847	2.11162	1.95834	1.79592	2.25103	2.08649	0.745779	0.069555	0.771299	2.43809	2.12447	2.01763	0.481906	0.460755	0.117181	0.187659	1.59787	0.567814	0.213218	1.31858	0.482988	1.517	16.3487	11.6732	11.3386	13.8351	11.0036	13.0764	5.58291	15.8183	1.23122	13.7736	5.66617	13.7089	3.78543	2.41305	2.11134	7.21228	0
Smp_045710	Chr_5	4089472	5766	Chr_5	Sjp_0107190	SJC_S004969	7709	3.387	Aut_Shared	Aut_Shared	33.3473	33.2097	34.2843	35.5328	33.6758	36.836	34.2762	28.8651	23.4256	41.8757	44.5943	43.0607	20.1548	11.4786	7.08277	10.9771	27.2561	11.7555	13.0813	31.6792	18.4378	28.1574	134.848	149.761	153.247	136.003	155.881	161.783	151.37	171.684	246.7	185.251	118.874	186.984	0	27.0239	28.8952	69.1141	0
Smp_045730	Chr_ZW.unplaced.SC_0272	92303	4015	Chr_UP	Sjp_0094980	SJC_S002706	4167	5.952	n.a.	n.a.	16.5453	17.6066	16.3951	16.3787	15.7255	14.9028	21.6335	17.5601	17.7576	12.3658	12.3963	11.1879	36.0167	32.9782	24.2268	24.5039	15.75	23.6077	23.4248	20.2025	18.388	21.3589	59.5838	56.1735	57.7812	51.8112	56.6875	50.1568	93.9834	47.296	130.611	47.2178	82.8281	46.4439	10.8666	20.3244	14.9047	12.4279	17.742
Smp_045750	Chr_ZW	36582408	9603	Chr_PSA	Sjp_0086500	SJC_S001878	45547	4.909	PSA_shared	PSA_shared	9.54642	12.9964	10.3573	8.91494	12.0095	10.7526	10.7453	5.50157	8.33341	8.67039	6.94326	6.96869	6.44722	6.82358	5.71653	6.31675	6.22668	7.74706	6.65853	4.38786	9.44527	4.06971	22.4953	21.4498	31.4219	26.3513	23.4288	25.0596	29.7838	22.2496	27.1278	17.5689	27.861	20.0518	0	20.472	21.2973	10.8483	5.61092
Smp_045760	Chr_ZW	36597918	12719	Chr_PSA	Sjp_0086490	SJC_S001878	32296	12.088	PSA_shared	PSA_shared	6.18152	6.27413	5.41107	6.18486	6.18438	5.08846	5.25934	2.69223	5.70865	4.507	4.31247	4.27743	3.29905	2.94846	1.20978	1.94138	2.87484	5.52418	4.46597	1.97117	6.79961	2.19477	24.3008	24.5518	25.9243	24.3325	21.3361	20.6564	26.1161	19.9908	24.2926	19.5247	30.571	20.0796	5.27929	17.9283	16.888	6.45487	4.44681
Smp_045780	Chr_ZW	36675863	12508	Chr_PSA	Sjp_0096390	SJC_S002937	9235	8.372	PSA_shared	PSA_shared	5.28809	5.9373	6.16802	5.93104	6.77568	7.59019	6.78211	6.2905	6.99047	7.38348	7.4879	8.70257	7.33535	8.35984	5.77453	7.32365	6.01864	5.63939	4.54131	3.95831	7.35278	5.07064	27.6024	29.5384	31.0308	34.2106	35.072	39.8956	42.6187	43.0115	72.1867	45.3201	51.9588	51.8588	6.4384	22.5606	27.7956	5.2527	0
Smp_045790	Chr_ZW	36691181	7819	Chr_PSA	Sjp_0096380	SJC_S002937	1472	4.056	PSA_shared	PSA_shared	3.83361	5.81174	4.86406	3.56202	5.89398	7.63628	5.56551	4.02844	4.55843	7.29725	7.64551	9.52876	14.2122	13.2375	10.5902	11.6707	13.7909	10.3956	10.3214	14.9006	14.8376	12.4814	14.735	14.3034	29.2875	27.869	25.3673	38.4544	33.8559	40.3538	41.6192	37.925	31.8647	52.5181	2.78014	17.7048	20.8868	21.1552	14.0565
Smp_045810	Chr_ZW	36739905	7421	Chr_PSA	Sjp_0075570	SJC_S001218	24369	10.201	PSA_shared	PSA_shared	7.76957	8.23848	7.07399	6.88893	6.83188	6.24355	11.5951	14.5216	9.91863	6.08533	5.58192	5.90066	6.51485	8.68202	5.49401	6.03943	5.08183	7.35162	7.40336	5.53607	7.04924	5.20615	51.8022	48.3638	54.4415	49.033	52.0454	41.935	75.1689	35.0376	172.28	34.4219	71.8257	39.6753	10.1725	2.36582	3.89893	3.17947	5.69593
Smp_045920	Chr_ZW	36970787	1542	Chr_PSA	Sjp_0103790	SJC_S004158	6442	0.506	PSA_shared	PSA_shared	138.71	162.544	157.266	129.456	152.946	161.218	209.176	316.774	193.343	163.574	153.741	183.727	47.8956	42.5659	34.8039	35.6027	26.1306	33.0573	32.2073	26.7794	26.2645	32.4411	103.119	97.5544	135.983	118.311	136.345	135.203	201.121	147.256	532.872	146.936	203.046	179.816	0	7.03361	6.37457	14.1585	15.5313
Smp_045940	Chr_ZW	36998631	33555	Chr_PSA	Sjp_0100290	SJC_S003744	5442	6.052	n.a.	n.a.	9.09945	6.56219	6.03838	16.8265	14.6957	11.9655	5.76621	2.49901	6.01382	9.26176	8.98901	9.81647	14.7136	9.99525	15.4876	16.898	13.5209	3.72803	3.18214	13.9325	3.92266	14.4822	46.6239	85.5279	32.3547	70.6474	30.489	57.6912	29.0295	42.2242	21.3399	42.4936	31.9566	49.7492	68.8833	32.8725	24.9755	93.9959	19.2979
Smp_045990	Chr_ZW	37187666	11306	Chr_PSA	Sjp_0082840	SJC_S001683	18611	1.138	PSA_shared	PSA_shared	3.22612	6.97968	3.83957	4.19077	4.98471	6.90004	1.41688	0.711965	0.639643	3.10721	1.76184	1.37683	0.191472	0.0614849	0.0633715	0.0652407	0.114146	0.0487418	0.0274542	0.0186346	0.0373142	0.138268	0	0	0	0	0	0	0	0	0	11.4253	0	0	0	0	0	0	0
Smp_046100	Chr_ZW	37421571	9337	Chr_PSA	Sjp_0035700	SJC_S000251	176110	3.279	PSA_shared	PSA_shared	36.4873	43.0553	44.0549	43.1197	43.3731	40.6657	40.9196	72.1098	39.781	26.9594	27.3933	29.427	19.3131	18.0524	28.6588	22.477	24.2802	19.7128	19.8798	27.3705	20.2872	25.4966	378.248	279.33	423.937	268.42	443.163	244.17	820.888	443.53	2710.73	450.364	908.729	468.006	383.185	306.64	461.037	463.237	214.797
Smp_046130	Chr_ZW	37543581	11532	Chr_PSA	Sjp_0035670	SJC_S000251	95132	12.828	PSA_shared	PSA_shared	5.69025	5.13323	4.58284	6.4404	6.49093	5.18033	2.9628	0.72634	2.40595	4.18575	3.71985	2.92123	9.19511	6.08193	4.55025	5.14133	7.0254	5.42377	6.16381	7.96547	6.84101	6.71982	23.5942	24.6364	20.4194	25.8671	18.3526	19.6544	13.6023	18.7692	5.60624	16.6415	12.3282	14.6302	10.0155	16.4726	14.622	14.964	4.21637
Smp_046140	Chr_ZW	37555323	27198	Chr_PSA	Sjp_0035680	SJC_S000251	108507	23.551	PSA_shared	PSA_shared	8.59219	7.942	8.07338	8.09407	8.44747	8.08839	5.95641	1.62839	5.62525	8.27451	8.99005	8.62112	3.46496	2.62179	2.87139	3.77227	7.24925	4.39676	4.45088	5.94913	6.15795	5.78875	35.046	33.7157	31.0611	35.311	33.5265	34.0256	28.2347	35.7855	14.8952	38.6747	29.5325	39.9254	16.2998	19.004	15.8242	27.2574	11.397
Smp_046160	Chr_ZW	37634729	5633	Chr_PSA	Sjp_0035690	SJC_S000251	149973	2.311	PSA_shared	PSA_shared	58.499	63.7506	63.4247	77.144	73.2876	69.088	79.4393	70.9363	71.3739	64.8865	67.2661	71.9801	10.7349	7.09911	6.37176	7.50125	13.9243	8.60901	8.32061	12.1181	10.3353	11.18	139.591	181.184	143.036	173.218	156.176	163.263	249.021	173.189	407.747	184.738	243.627	206.554	20.6166	32.2225	32.8063	37.587	23.4554
Smp_046190	Chr_2	32855275	10499	Chr_2	Sjp_0050360	SJC_S000470	92440	2.019	Aut_Shared	Aut_Shared	19.0396	26.6501	23.281	19.8695	24.4837	24.2713	29.3777	29.6959	28.7704	26.0758	26.2165	29.0371	5.79047	7.23093	2.98642	3.29531	12.6471	8.71305	7.74589	11.2375	8.88029	12.1457	28.1401	31.0531	41.0763	41.326	41.7112	38.1599	47.8438	37.8397	90.0422	36.9045	53.4347	46.9954	50.1645	11.365	11.1618	11.3677	27.5921
Smp_046280	Chr_6	14885622	19154	Chr_6	Sjp_0097300	SJC_S003103	9509	2.35	Aut_Shared	Aut_Shared	6.24906	4.47025	3.43694	6.92384	6.29331	3.40326	4.45985	2.70072	4.0887	1.95051	2.16138	2.50027	2.71812	1.17664	1.18631	3.22746	0.553987	1.68309	1.45848	0.648966	1.03519	0.466373	13.87	20.4017	11.0273	17.328	9.94924	10.0069	15.1395	4.87917	19.0921	6.86514	15.2416	8.06665	4.60746	7.33202	10.2455	2.50247	3.87696
Smp_046450	SC_0182	113634	7743	Chr_UP	Sjp_0074280	SJC_S001152	28750	10.841	n.a.	n.a.	4.78097	5.69592	5.74036	6.06821	6.0548	5.56646	8.54149	7.53591	7.81562	5.79856	5.425	5.64867	19.1558	25.2039	10.9673	11.2953	15.4263	7.54409	7.73689	9.08797	13.7846	11.1618	28.2087	38.1616	36.7521	37.4157	36.2119	35.9981	62.268	38.6708	100.617	36.7054	64.3786	40.4652	12.7029	6.14542	9.50362	7.779	1.74135
Smp_046500	Chr_6	6149762	1014	Chr_6	Sjp_0075590	SJC_S001220	11580	0.917	Aut_Shared	Aut_Shared	261.178	212.913	208.501	264.168	264.895	184.421	380.683	420.57	307.2	162.668	162.963	183.68	456.084	357.821	450.97	486.129	56.5652	204.887	176.014	84.7719	127.311	90.2981	228.133	230.804	184.221	222.322	185.441	160.19	329.963	126.935	676.452	128.369	299.649	152.997	32.4908	43.1434	76.7844	0	44.3066
Smp_046550	Chr_6	6195085	10625	Chr_6	Sjp_0042600	SJC_S000340	8200	10.225	Aut_Shared	Aut_Shared	6.84314	6.54024	6.29337	6.94135	6.85547	5.81648	10.5767	6.66926	7.87356	5.6868	5.58189	5.75912	9.73556	9.3421	8.2108	8.08273	3.15801	5.05692	4.26523	3.37093	6.19411	2.60631	43.2169	47.5646	42.7317	45.6924	44.8523	40.0083	62.4451	30.7029	73.4189	30.299	53.997	33.5188	19.1269	23.3918	9.35537	2.60696	8.1081
Smp_046650	Chr_2	20789617	713	Chr_2	Sjp_0022730	SJC_S000126	388016	3.586	Aut_Shared	Aut_Shared	0.963571	0.714506	0.738465	0.508499	0.734442	0.446049	0.0963514	0	0.243585	0.255644	0.260918	0.254877	0.961449	0.359197	0.143554	0.197051	2.81557	0	0.43534	1.77293	0	2.50572	1.78393	1.29549	1.49007	1.35715	1.90269	0.67629	0.282592	1.12752	1.75984	1.20525	0.605607	0.783178	0	0	0	0	0
Smp_046680	Chr_2	20650202	17371	Chr_2	Sjp_0022740	SJC_S000126	421992	13.584	Aut_Shared	Aut_Shared	5.03971	5.4134	4.8054	4.98742	5.14536	4.32468	5.73147	3.78745	3.91178	3.85639	3.74898	3.41227	5.99423	6.37335	5.7135	5.64545	3.21109	3.72755	3.39506	2.8987	3.81292	3.02117	36.0152	34.9649	39.5259	35.5829	35.7647	30.9955	40.1963	24.0377	48.4221	24.163	29.7927	23.5044	11.7008	19.0634	22.8474	8.49413	13.1914
Smp_046800	Chr_2	20095441	11335	Chr_2	Sjp_0041830	SJC_S000332	220640	6.453	Aut_Shared	Aut_Shared	1.43907	2.26323	1.5389	4.58646	5.14881	5.58843	1.10657	0.983526	0.99266	4.62724	4.92983	5.88808	7.0154	4.2316	6.39017	5.84424	8.5264	1.7016	1.50612	6.56119	1.33987	5.93031	13.2396	34.621	17.5434	38.7066	12.9792	47.2573	11.941	46.8562	23.142	54.4635	13.3126	68.243	13.3539	2.8227	7.37695	25.3059	22.3389
Smp_046870	Chr_2	19695570	3668	Chr_2	Sjp_0052180	SJC_S000493	170440	1.688	Aut_Shared	Aut_Shared	64.7369	58.591	60.242	46.7004	53.4087	45.1397	63.2491	55.4384	48.47	28.3184	36.4252	36.7421	54.7195	61.3636	61.4366	53.1078	18.9601	18.5544	15.2322	16.5422	13.1117	19.97	104.568	72.9642	94.8934	82.0833	91.3745	72.9166	127.828	55.3293	216.843	64.6184	112.793	75.6674	2.18908	10.2173	14.5997	13.6707	7.36548
Smp_046880	Chr_2	19707023	20510	Chr_2	Sjp_0052190	SJC_S000493	181260	10.743	Aut_Shared	Aut_Shared	1.54789	1.88416	2.13221	2.02378	2.13097	1.92204	1.85467	1.21926	1.34159	2.16992	1.90363	1.96894	4.32745	4.7165	3.00924	3.04662	2.81053	2.05545	1.7404	2.68105	2.50944	2.40635	18.8903	22.7988	21.1416	21.6066	23.6402	21.453	24.7699	27.2685	33.2604	26.5827	22.0921	26.6656	0	11.4087	13.0947	7.99332	5.66785
Smp_046890	Chr_2	19742216	12212	Chr_2	Sjp_0085700	SJC_S001821	7429	11.777	Aut_Shared	Aut_Shared	8.39856	9.05055	9.46646	7.97989	6.98418	6.65509	11.3637	8.24411	6.86069	4.39249	4.13127	3.73627	4.86597	3.60115	1.46954	2.00472	6.01188	4.46744	3.30426	4.84785	4.66369	5.41299	52.0847	51.6988	60.6511	42.0497	62.057	42.6827	75.0841	26.5284	97.8094	24.8621	49.7085	24.5171	19.6688	16.0128	10.0448	14.2649	0
Smp_046900	Chr_2	19807187	8591	Chr_2	Sjp_0094170	SJC_S002612	5213	7.106	Aut_Shared	Aut_Shared	7.47625	8.58159	8.1613	6.41527	6.58584	8.0216	8.28214	9.46355	7.76468	9.47298	9.8753	9.26079	4.94725	5.23824	2.21999	3.4139	5.12415	5.38823	6.5035	7.01378	4.46869	6.47274	53.1936	47.1787	62.6289	40.7388	59.4954	59.0527	66.5682	67.0914	137.115	74.0562	67.28	73.4416	9.07174	8.24821	9.97021	9.09354	4.10589
Smp_046910	Chr_2	19817387	278	Chr_2	Sjp_0094180	SJC_S002612	13873	0.363	Aut_Shared	Aut_Shared	120.771	117.17	107.239	128.675	141.759	96.9413	218.605	251.472	164.833	102.461	100.156	121.218	115.507	106.075	53.6315	61.4044	17.0214	36.6722	31.2631	12.8835	42.4909	20.083	97.7902	90.8472	95.7524	103.93	84.3976	82.3185	197.118	86.5113	426.294	82.539	167.678	108.394	0	64.1638	33.0254	62.2214	0
Smp_046980	Chr_ZW	29181128	2804	Chr_Z	Sjp_0079920	SJC_S001451	35738	2.842	S0	S0	22.6447	19.113	18.496	39.2374	44.0543	35.7134	24.5987	15.9649	18.4412	32.8099	29.9593	29.4494	22.3889	26.9834	43.8399	37.2914	14.9836	6.97687	5.09211	11.8716	12.0364	10.9113	51.2056	86.9642	47.5925	96.3409	43.9985	81.8307	53.7547	64.9307	61.4904	61.3688	45.3735	63.7381	12.2204	9.10895	3.42574	10.014	0
Smp_047090	Chr_ZW	28791866	5401	Chr_Z	Sjp_0114500	SJC_S008319	1618	5.424	S0	S0	9.43632	9.6839	7.3478	14.4302	15.9116	17.8816	7.81403	6.12442	7.99846	19.5092	19.0492	21.4246	9.69294	12.3017	17.637	12.7074	10.6728	3.77518	2.70111	13.0287	4.99906	10.089	67.2629	90.6802	59.1062	101.026	51.3193	117.025	56.2852	129.31	77.0824	126.926	61.6612	147.845	54.3296	17.9973	11.8438	31.3258	20.5507
Smp_047100	Chr_ZW	28767209	18897	Chr_Z	Sjp_0081960	SJC_S001606	22875	1.456	S0	S0	34.5596	32.2037	34.2839	63.9681	70.1283	71.2079	25.5498	12.335	25.497	57.4762	55.9078	56.8552	1.90355	1.57019	2.03838	2.19144	4.68946	1.1519	1.24836	6.12081	0.937647	5.11714	64.1079	119.949	68.0168	122.554	66.5049	135.382	61.6626	121.907	49.5561	116.595	56.5865	131.501	0	0	0	8.88716	0
Smp_047200	Chr_ZW	28525276	1476	Chr_PSA	Sjp_0075700	SJC_S001231	15191	1.405	S1_jap	S1_jap	1007.1	910.545	807.635	1943.98	1795.07	1317.4	1606.51	1969.99	1716.11	1245.41	1251.12	1304.68	1231.74	1161.36	1638.2	1506.06	383.838	641.987	629.417	271.633	1014.38	308.355	749.439	1442.34	667.635	1294.23	633.79	985.562	1332.05	938.952	2969.23	950.736	1560.61	1052.75	101.501	284.095	255.01	112.886	214.775
Smp_047370	Chr_2	9050046	7914	Chr_2	Sjp_0024400	SJC_S000141	54437	7.243	Aut_Shared	Aut_Shared	82.0548	95.1944	95.1508	84.1643	90.6536	82.2321	116.762	140.349	94.0468	85.2715	85.2774	79.5533	78.9749	46.984	58.48	80.3324	93.8014	79.5555	69.7355	73.0496	69.4594	87.0546	416.12	421.91	491.779	459.016	506.755	418.158	585.861	384.737	1266.08	393.784	517.305	389.39	264.528	230.682	231.833	193.173	146.964
Smp_047400	Chr_2	8944757	2664	Chr_2	Sjp_0024430	SJC_S000141	158536	2.645	Aut_Shared	Aut_Shared	4.57232	2.71237	3.85457	5.03796	4.59568	2.96871	8.57803	7.50484	6.2196	4.01059	2.72888	4.09727	8.68133	7.25143	5.22528	6.23641	4.952	6.82637	4.42759	6.80133	8.70986	7.0417	12.1211	13.3719	9.48627	13.9069	11.4933	10.0971	31.2362	12.4284	52.2889	8.99925	23.7993	16.3279	0	5.24845	11.5441	11.2315	42.1421
Smp_047440	Chr_2	8891057	6366	Chr_2	Sjp_0024460	SJC_S000141	228032	3.946	Aut_Shared	Aut_Shared	7.16949	12.3371	10.7039	11.8726	13.7081	11.092	15.3816	16.1865	13.7983	12.0143	9.01033	10.1915	16.844	13.1784	9.19139	11.8681	5.22575	5.75659	4.43704	4.46783	4.63889	3.7887	19.0392	29.4194	29.0855	34.3729	26.1066	27.9625	37.9688	26.9009	75.9304	20.9346	38.6908	26.1617	8.5668	16.3909	11.9587	10.5008	7.25209
Smp_047460	Chr_2	8832642	30890	Chr_2	Sjp_0029490	SJC_S000187	179531	23.508	Aut_Shared	Aut_Shared	0.835987	1.32972	1.4419	0.745849	0.698061	0.865989	0.47033	0.0631869	0.179594	0.696374	0.523105	0.388799	0.883011	0.51996	0.333559	0.495766	2.39065	0.294358	0.26126	2.25756	0.20486	2.38577	7.77369	7.31805	13.4733	7.42057	16.1264	9.63484	5.39227	7.51769	1.10062	5.60223	2.41198	4.53172	4.35345	0.923594	0.604871	10.6382	3.66182
Smp_047500	Chr_2	8744524	7120	Chr_2	Sjp_0029470	SJC_S000187	82162	10.899	Aut_Shared	Aut_Shared	3.84405	4.91333	5.32106	3.28179	4.55411	4.28271	3.69852	2.83726	1.9769	3.13619	3.27447	3.12677	6.66359	6.74696	5.54897	6.76341	6.10225	4.99218	5.49299	5.14871	4.4439	3.76386	19.2087	16.3501	24.1376	22.1274	30.378	22.0288	22.7604	18.7008	29.8124	19.0662	13.8999	17.8621	15.3712	11.9916	14.3317	6.98722	17.3942
Smp_047700	Chr_2	8370342	23223	Chr_2	Sjp_0024510	SJC_S000141	334530	18.982	Aut_Shared	Aut_Shared	0.773643	1.20134	1.09514	0.931077	1.09931	1.13376	0.843373	0.54777	1.02004	1.10389	0.936539	0.887341	0.469192	0.374958	0.317336	0.432569	2.02527	1.30513	1.40342	1.67835	2.03462	2.46181	7.76443	8.90878	12.8501	12.6535	11.5597	12.2386	11.2254	13.5909	14.9566	11.4822	14.3809	13.3682	0	4.94678	7.29601	11.8753	4.91062
Smp_047720	Chr_3.unplaced.SC_0124	644566	21762	Chr_UP	Sjp_0031450	SJC_S000201	47334	29.673	n.a.	n.a.	2.86753	3.01356	2.29803	3.07262	3.16797	2.22972	1.60689	0.541546	1.17259	1.56681	1.91895	1.24528	2.76209	1.9872	0.923422	1.44778	0.395348	1.39275	1.41206	0.406612	1.26008	0.50284	15.2569	16.1975	16.117	16.5782	13.1969	12.2001	9.50238	8.31764	5.71621	10.1726	7.51612	7.03987	1.52989	3.89237	2.97161	1.24493	7.70589
Smp_047740	SC_0302	35837	1218	Chr_UP	Sjp_0024600	SJC_S000141	529928	4.003	n.a.	n.a.	31.2368	35.4601	30.3646	39.8061	38.5144	31.6034	68.4185	85.38	73.4641	37.7218	37.7319	39.5004	199.712	233.068	202.439	149.956	77.1118	134.828	122.324	131.288	102.178	110.194	129.796	156.785	134.885	149.372	124.345	124.443	312.99	157.596	690.127	157.447	372.117	169.189	34.7152	104.705	121.558	71.0836	49.2048
Smp_047870	Chr_2	30393238	19718	Chr_2	Sjp_0049810	SJC_S000461	44233	11.588	Aut_Shared	Aut_Shared	2.83275	2.54276	3.0965	2.31197	2.4651	2.32147	3.47862	1.25853	2.4247	3.35658	3.64498	3.83101	6.19747	7.51663	2.56776	1.94343	6.46496	1.5511	1.36954	8.2273	2.65303	6.4897	36.4119	35.9077	34.9598	28.0397	42.6315	33.3241	51.5759	43.6963	36.4076	47.2862	41.4089	54.5359	0	1.3303	0.868872	4.25125	0
Smp_048040	Chr_2	31239037	12807	Chr_2	Sjp_0042450	SJC_S000338	421013	13.687	Aut_Shared	Aut_Shared	0.331348	0.224641	0.27087	0.17422	0.429254	0.276226	0.0925617	0.019732	0.0744559	0.143526	0.0683606	0.152635	0.132408	0.137125	0.109224	0.0329111	0.123161	0	0.0242365	0.131605	0	0.0871877	3.22264	1.99511	2.47	6.32022	3.19714	5.21187	2.72885	3.7311	0.896498	1.86776	1.78734	4.1933	0	0	0	0	0
Smp_048080	Chr_1	48204848	29222	Chr_1	Sjp_0021200	SJC_S000115	74303	21.712	Aut_Shared	Aut_Shared	1.05434	0.967677	1.04281	1.23393	1.16637	1.05817	1.79824	1.00755	1.43491	1.04954	0.948063	1.0524	0.971688	0.801297	0.407473	0.580557	0.515236	0.763757	0.52048	0.425375	0.808465	0.443252	19.2158	23.1408	18.4937	19.9581	19.1523	17.9729	27.2404	15.4276	30.627	12.9151	23.2734	15.3622	3.69615	3.92654	1.03057	2.01177	12.4933
Smp_048160	Chr_1	48573373	18196	Chr_1	Sjp_0020860	SJC_S000114	7072	22.659	Aut_Shared	Aut_Shared	19.3668	17.527	14.8132	14.7269	16.2546	12.0904	5.07267	1.32301	7.38868	8.83721	7.65685	5.60103	7.24527	5.25195	2.94942	5.19259	8.28236	5.39081	5.73167	9.4944	10.2246	7.81801	28.4071	21.8113	25.6268	23.1324	22.999	18.0448	8.24633	13.2317	3.67496	11.5093	13.451	9.05545	3.91769	5.09758	6.35357	7.73084	11.243
Smp_048230	Chr_1	48826385	15141	Chr_1	Sjp_0020970	SJC_S000114	271770	5.179	Aut_Shared	Aut_Shared	7.25566	8.90518	8.41125	8.28767	8.29305	13.7578	15.7225	17.5476	15.9104	17.7264	18.2469	18.9338	4.21537	4.35919	3.21328	3.50292	12.984	8.28013	11.5828	12.2728	10.4208	11.4309	84.5313	85.5239	98.4091	91.4429	98.7499	167.141	204.401	221.284	441.684	222.946	245.887	260.272	91.8038	36.3677	72.2135	43.1855	14.1252
Smp_048270	Chr_1	48937395	3270	Chr_1	Sjp_0021010	SJC_S000114	384563	1.605	Aut_Shared	Aut_Shared	18.7031	18.6779	16.4993	17.8284	17.9241	17.3951	37.3143	51.5745	31.3842	23.9895	22.2358	23.9175	10.537	13.8403	8.86859	7.51897	6.84075	6.48818	7.68874	6.44291	12.9014	6.48796	55.9858	62.9682	50.9726	47.5193	47.803	52.6677	93.9555	60.6431	254.988	53.2764	89.6566	62.65	0	8.63603	11.2995	3.41136	0
Smp_048310	Chr_1	46586121	22988	Chr_1	Sjp_0021060	SJC_S000114	471949	13.926	n.a.	n.a.	2.09354	2.04227	1.70191	1.44034	2.44403	1.72289	2.85325	1.95873	2.17444	1.80561	1.64129	1.34076	8.10489	14.7394	5.07585	4.04141	1.52824	1.74998	1.47178	1.15478	1.59662	1.22406	30.2938	19.629	29.4135	35.1875	25.2687	26.0197	43.6215	27.7777	56.6185	23.0885	35.1437	20.4709	33.9801	10.239	15.7824	14.9798	56.4797
Smp_048420	Chr_1	46916158	9290	Chr_1	Sjp_0021170	SJC_S000114	778180	4.818	Aut_Shared	Aut_Shared	14.6573	18.4535	17.8631	13.7414	13.8342	15.9356	19.2431	26.8222	16.4679	15.3578	15.3972	16.4499	10.8627	12.3623	6.91541	5.90951	9.07588	8.12672	8.78736	9.68371	9.53645	9.88004	106.614	93.9406	130.16	92.8284	129.768	115.787	145.531	107.46	375.876	107.625	137.614	120.407	4.71693	12.8306	15.2962	13.4337	9.31759
Smp_048520	Chr_ZW	20338534	9885	Chr_PSA	Sjp_0052490	SJC_S000497	108982	4.785	PSA_shared	PSA_shared	13.0885	14.7789	13.6142	13.8948	12.9134	13.3408	21.9513	17.1017	21.8754	16.4491	16.3694	16.2087	9.62854	9.37894	7.61744	7.79238	5.35275	4.96162	4.01931	3.30358	5.07871	3.9988	58.8804	64.3052	61.6824	55.1036	65.59	60.604	92.3946	61.4074	123.957	62.8129	96.7186	66.545	15.6806	7.16889	6.52335	4.75579	9.02203
Smp_048540	Chr_ZW	20288631	10509	Chr_PSA	Sjp_0060110	SJC_S000679	1154	6.327	PSA_shared	PSA_shared	2.76478	3.32072	2.9926	2.9929	3.33012	3.60829	5.20613	4.50334	4.76302	3.68443	3.27454	3.73528	1.95007	3.14376	1.56808	1.29682	2.36054	3.93287	2.21523	1.90455	3.77354	1.9338	21.8278	23.1487	27.1881	24.0419	23.4863	28.8441	49.3963	34.0648	81.8398	30.2511	51.9234	33.4546	5.34207	27.2842	23.9195	5.82992	27.2214
Smp_048550	Chr_ZW	20277066	3938	Chr_PSA	Sjp_0060120	SJC_S000679	16156	1.892	PSA_shared	PSA_shared	36.8685	40.898	41.4996	38.922	39.9404	36.6604	42.1242	27.4069	38.1654	33.0868	35.9594	34.2987	9.99565	9.4765	3.05832	5.28024	9.57651	9.37582	7.488	9.844	8.24894	8.05277	42.1791	44.4877	48.4315	43.8956	49.3991	40.2969	53.1965	38.3603	61.4204	42.4681	54.9755	42.7748	5.38221	21.7631	15.0634	16.1537	0
Smp_048620	Chr_ZW	19924267	11291	Chr_PSA	Sjp_0087950	SJC_S002031	3076	8.627	PSA_shared	PSA_shared	6.73389	7.2765	6.41545	7.13775	7.65565	6.57363	8.43732	5.4628	6.78384	5.75344	4.84954	5.76644	6.77112	4.34206	4.3029	4.98354	2.57805	2.12308	2.00682	3.22807	3.8111	2.27456	26.5794	28.2161	29.8075	28.6487	27.5493	25.8339	42.7814	27.4418	48.0468	22.739	37.1678	28.4555	21.6908	4.41897	3.69817	6.18758	9.7843
Smp_048650	Chr_ZW	19845555	509	Chr_PSA	Sjp_0114570	SJC_S008346	6635	0.42	PSA_shared	PSA_shared	316.742	306.246	304.851	409.781	379.621	389.496	462.608	879.02	434.668	400.061	357.712	423.108	269.357	283.565	411.829	301.973	96.3464	138.581	150.015	88.9918	146.703	100.034	241.268	341.185	252.957	303.072	269.167	305.9	438.51	348.675	1546.29	309.983	460.237	405.32	13.7382	94.3988	101.909	45.5808	0
Smp_048690	Chr_4	16322182	1010	Chr_4	Sjp_0027890	SJC_S000172	13916	0.934	Aut_Shared	Aut_Shared	20.5787	22.4949	20.6974	13.9667	17.5696	21.4849	13.0709	5.06024	8.10524	28.7445	25.0442	36.9062	11.1097	8.62143	5.26971	6.50322	24.8453	7.09304	4.91719	31.9153	7.10085	25.6489	16.7109	12.2902	16.8842	16.1904	19.9284	18.7193	11.4323	23.1133	8.2152	21.6431	9.1817	31.1575	0	4.06841	1.78565	24.3546	0
Smp_048870	Chr_2	13653727	392	Chr_2	Sjp_0070810	SJC_S000987	38329	0.311	Aut_Shared	Aut_Shared	237.487	316.364	244.804	249.414	302.261	220.69	392.177	643.049	331.423	189.075	188.678	194.385	27.3359	30.9867	30.6366	24.1928	59.9908	92.7829	85.5177	62.345	125.917	87.7339	156.328	177.871	222.01	194.967	175.652	156.605	362.59	155.246	1106.67	164.439	344.345	185.184	80.6891	130.972	134.457	78.8876	107.54
Smp_048940	Chr_2	13753927	6913	Chr_2	Sjp_0082090	SJC_S001616	14823	0.856	Aut_Shared	Aut_Shared	157.177	159.241	160.095	165.175	165.672	151.188	153.787	103.801	125.344	173.801	156.775	160.162	16.2784	13.0988	9.4265	7.51975	13.1922	9.56588	8.0372	11.8858	9.88625	11.4359	122.541	135.913	134.585	131.462	138.275	130.826	124.627	130.98	153.54	118.041	107.037	129.96	9.62452	5.28458	3.29438	4.29804	6.38849
Smp_048970	Chr_2	13817568	4790	Chr_2	Sjp_0075070	SJC_S001184	39364	9.694	Aut_Shared	Aut_Shared	11.7404	11.1803	10.3396	11.7637	10.7629	10.6501	8.92245	5.69731	9.64143	9.14606	8.49364	7.58312	17.7009	18.5302	15.6629	16.9755	12.2737	11.6197	12.5066	10.908	14.6203	9.55765	32.8538	33.7051	32.9984	30.6696	31.4758	30.8346	27.6039	25.9282	32.6467	23.6327	33.3088	22.4745	0	21.8511	21.0672	13.9892	0
Smp_048980	Chr_2	13835737	34465	Chr_2	Sjp_0092040	SJC_S002469	7630	12.202	Aut_Shared	Aut_Shared	9.11486	7.53841	7.67183	7.55251	7.60429	8.42536	3.7	1.10667	4.35483	7.94235	7.31748	5.91748	2.38367	1.37578	0.765217	1.47672	4.67228	1.67889	1.43198	3.49661	1.60353	3.8619	46.8671	37.478	39.2992	38.2164	40.7251	44.1179	21.0751	40.8892	12.2196	37.0952	26.941	33.6279	13.7587	5.38046	3.20819	6.88105	7.97624
Smp_048990	Chr_2	13878756	13752	Chr_2	Sjp_0112790	SJC_S007853	11398	14.24	Aut_Shared	Aut_Shared	8.03785	6.47752	7.13174	6.86562	7.63992	8.48577	5.56449	2.49399	5.18331	10.6223	10.8509	10.2053	4.83266	5.007	2.68439	3.17733	3.35751	3.36607	3.52109	3.92196	3.12908	4.51452	67.4812	56.4195	54.198	61.2009	60.087	68.6361	45.8586	78.482	38.7259	84.1832	47.27	82.403	18.7152	20.6781	13.5688	24.4494	6.32681
Smp_049000	Chr_2	13893980	20235	Chr_2	Sjp_0077380	SJC_S001304	462	7.305	Aut_Shared	Aut_Shared	3.84323	5.19108	4.89389	3.53309	4.77016	4.57834	3.83118	1.44186	4.20506	4.75088	4.33655	4.18252	3.54288	7.33181	1.6844	1.51884	3.8479	2.53274	2.62308	2.56131	2.85628	3.03502	24.6243	21.1573	31.0443	33.1492	32.7027	28.8528	26.6077	30.9143	15.4951	27.7193	33.2899	28.4499	3.84346	21.2349	18.2239	23.0167	0
Smp_049330	Chr_1	49167553	20847	Chr_UP	Sjp_0021290	SJC_S000115	328897	18.106	n.a.	n.a.	4.98572	4.57084	3.82463	3.60236	3.32321	2.82696	9.96767	15.7962	9.30294	2.28567	2.50999	2.61053	4.9688	4.03653	2.79693	3.11531	4.51907	8.30035	7.45954	3.7696	7.68994	4.0386	33.4371	25.3327	32.2285	23.2071	28.2103	19.2853	76.558	16.7164	225.898	17.9557	75.0387	19.1802	13.5424	38.7892	42.0296	18.9999	34.1811
Smp_049610	Chr_1	50123869	4549	Chr_1	Sjp_0040690	SJC_S000315	164873	9.449	n.a.	n.a.	7.95366	8.05354	7.44079	6.56135	7.61144	6.97128	4.88771	1.84354	4.08291	5.51627	5.06423	4.62915	1.03107	1.25468	0.750011	0.625428	1.04022	0.181713	1.02351	1.2968	0.55644	1.76734	33.4765	24.347	30.9403	28.0382	30.0542	25.9559	16.9643	18.9692	11.2321	15.9068	15.8238	17.0716	0	1.25601	0.41093	0.803419	2.48633
Smp_049680	Chr_1	50182068	951	Chr_1	Sjp_0010520	SJC_S000039	586002	0.784	Aut_Shared	Aut_Shared	237.997	237.92	247.25	211.117	280.891	227.948	217.71	164.489	154.496	218.494	229.992	227.331	323.541	282.114	281.698	275.454	184.104	167.756	166.133	187.643	222.249	193.03	159.81	148.472	170.154	189.363	173.164	157.74	166.194	146.653	232.444	158.588	131.556	164.872	130.47	126.478	126.3	153.342	77.8452
Smp_049740	Chr_1	50511950	14118	Chr_1	Sjp_0080490	SJC_S001527	165	12.101	Aut_Shared	Aut_Shared	1.94527	1.48215	1.83822	1.51847	1.89183	1.97071	0.42829	0.0334772	0.336858	1.48268	1.65686	1.25164	1.04523	0.43278	0.420494	0.885696	4.86507	1.32714	1.12128	5.23798	0.89646	5.93186	12.977	10.6045	11.1023	12.5584	14.1147	13.7867	3.59105	9.90589	0.665695	11.1427	2.95417	8.85981	24.7468	5.25303	4.59029	24.6583	0
Smp_049880	Chr_4.unplaced.SC_0032	1627253	7610	Chr_UP	Sjp_0100280	SJC_S003743	14856	2.507	n.a.	n.a.	11.1124	11.4467	11.3024	10.9663	12.6065	10.2084	11.3013	6.84068	11.1495	7.57464	7.46432	5.57278	16.4705	11.1876	15.2388	19.0761	11.852	9.73975	9.62599	9.41291	20.7334	7.54191	44.6515	44.0777	49.5225	45.4921	43.8162	39.37	50.4132	31.1007	55.8434	32.0904	55.4169	26.9464	12.4007	19.2415	28.8741	20.307	30.4559
Smp_049890	Chr_4.unplaced.SC_0032	1613773	9974	Chr_UP	Sjp_0100270	SJC_S003743	3529	10.364	n.a.	n.a.	2.14627	2.29917	2.37627	3.20758	2.87352	2.27294	3.55606	3.85668	3.24485	2.94427	3.13397	3.51495	5.332	7.08332	5.19261	4.67315	1.61018	3.50844	2.73862	2.07008	2.28406	2.73164	26.0684	38.923	24.1798	33.6752	29.9189	27.2766	59.3132	44.0914	118.092	50.4646	61.6612	58.0679	43.3836	19.6205	30.3576	28.1149	110.561
Smp_049920	Chr_4.unplaced.SC_0032	1436856	52113	Chr_UP	Sjp_0012810	SJC_S000055	285303	62.452	n.a.	n.a.	0.940581	0.980546	0.879857	1.04439	1.11917	0.912725	1.42739	0.547046	1.72502	1.06738	1.02947	1.08508	1.08143	0.845989	0.437989	0.666589	0.833727	0.761372	0.667099	0.788348	1.08478	0.805646	13.707	14.1981	13.1988	15.0464	12.5561	12.8504	20.6569	14.2611	15.4621	14.1099	26.509	15.4558	3.81079	1.85601	1.82983	2.39269	6.12524
Smp_049930	Chr_4.unplaced.SC_0032	1428507	6719	Chr_UP	Sjp_0012800	SJC_S000055	279035	5.092	n.a.	n.a.	22.9447	19.272	17.812	28.2628	22.9568	17.7053	30.0822	20.7911	21.9575	11.8309	11.865	9.69273	17.8277	12.2246	11.6079	11.2498	4.80181	5.29012	4.01914	6.58482	7.34622	5.48418	37.1436	47.3506	30.3334	37.2796	31.1733	29.0303	54.2083	18.8248	68.3087	19.5198	42.3408	17.2045	5.17576	7.68942	4.31868	10.5463	13.0767
Smp_049970	Chr_4.unplaced.SC_0032	1262707	8888	Chr_UP	Sjp_0099260	SJC_S003623	11297	1.528	n.a.	n.a.	81.8331	87.3636	84.4007	79.6807	84.5905	85.1726	109.67	131.501	93.5616	107.05	98.7613	104.763	14.7396	16.9267	11.2818	12.1678	18.3758	17.1436	15.5757	23.562	18.4166	22.3373	181.372	186.528	187.69	185.824	196.404	191.79	257.287	223.664	582.799	211.136	241.34	244.193	25.15	11.9696	7.53978	9.22706	11.8033
Smp_049990	Chr_4.unplaced.SC_0032	1225294	15326	Chr_UP	Sjp_0035550	SJC_S000250	405603	9.595	n.a.	n.a.	5.13173	5.39415	5.69922	5.35048	5.48975	5.183	5.08942	1.88586	4.32424	5.41869	5.7255	5.90592	3.63009	5.08003	1.6518	1.73032	5.20203	3.23611	2.91643	5.1138	5.36771	4.26944	24.1955	25.288	23.8925	26.7346	29.3502	24.1218	33.2643	33.0009	21.0923	33.4104	30.3637	38.5301	0	12.4841	7.82417	12.5065	0
Smp_050110	Chr_4.unplaced.SC_0032	1051962	8648	Chr_UP	Sjp_0114800	SJC_S008418	7843	3.521	n.a.	n.a.	15.6404	14.3356	14.6659	14.8992	14.212	14.0002	16.5513	16.9898	12.6108	11.4188	12.1479	13.0533	13.2629	12.5947	6.98299	7.21738	11.7394	10.3549	9.83452	11.9618	12.0494	11.7497	70.9518	66.6291	65.4479	56.8484	64.2796	61.0885	75.9331	52.3505	136.438	52.6195	62.0299	60.1067	8.43553	12.2199	18.3305	11.8197	21.2365
Smp_050130	Chr_4.unplaced.SC_0032	1032719	1284	Chr_UP	Sjp_0045030	SJC_S000384	30250	0.98	n.a.	n.a.	119.439	173.081	161.455	163.454	180.06	177.017	194.852	175.685	167.866	197.914	216.182	214.108	171.603	142.529	248.179	235.229	141.941	94.6354	72.7645	157.684	75.8979	187.841	72.9418	100.33	103.851	105.728	102.419	107.373	135.138	127.751	222.172	141.136	127.606	147.07	79.1984	52.3868	40.5477	97.0947	44.712
Smp_050160	Chr_4.unplaced.SC_0032	979318	12299	Chr_UP	Sjp_0045050	SJC_S000384	64787	8.047	n.a.	n.a.	8.72214	8.15121	8.22709	8.01827	9.26484	8.24007	7.70008	3.38975	5.9883	7.04697	6.21232	6.08471	3.28557	2.87958	0.779507	1.01669	3.11292	2.93482	2.01901	3.28898	3.53305	4.06734	32.275	29.337	31.5039	33.682	31.968	30.6725	29.0573	23.3506	23.0827	20.8768	25.4639	23.8907	4.05152	12.9167	15.8277	13.2384	0
Smp_050220	Chr_4.unplaced.SC_0032	783393	13724	Chr_UP	Sjp_0045140	SJC_S000384	312419	8.932	n.a.	n.a.	17.3358	22.2028	25.4822	12.9086	21.5023	23.0198	6.39558	1.78395	1.40171	17.6533	15.4885	11.0075	4.16951	1.19699	2.5233	3.28363	17.1039	2.08801	1.60582	12.9259	3.90397	9.16137	256.954	177.699	310.233	281.165	367.074	324.041	111.066	271.07	53.2425	239.334	25.1203	173.924	9.02552	2.41949	5.80399	11.826	5.27111
Smp_050250	Chr_4.unplaced.SC_0032	679210	1250	Chr_UP	Sjp_0035620	SJC_S000250	526475	1.166	n.a.	n.a.	151.32	124.815	109.241	174.312	131.355	101.888	242.395	214.714	217.999	87.6082	89.874	94.6239	93.9514	110.902	92.6099	63.1676	41.6412	36.1505	49.4153	28.8214	77.2873	18.0445	95.5635	113.291	82.2349	80.5536	74.2852	67.4125	170.773	56.9343	278.92	58.8289	172.675	65.7106	4.53521	5.78624	6.33443	4.94327	30.7373
Smp_050280	Chr_4.unplaced.SC_0032	590359	455	Chr_UP	Sjp_0091020	SJC_S002351	14237	0.403	n.a.	n.a.	1049.79	1019.17	918.963	1026.77	983.807	745.462	1837.04	3785.37	2126.66	633.367	648.423	681.36	1503.61	2111.66	2144.94	1315.43	469.572	3004.87	3028.25	714.47	1693.06	1095.51	997.872	922.002	894.888	895.521	894.114	715.119	2174.41	688.107	8379.95	702.937	2919.55	812.317	673.893	4503.61	5283.2	1394.58	2574.16
Smp_050350	Chr_4.unplaced.SC_0032	370779	1339	Chr_UP	Sjp_0018680	SJC_S000092	183379	8.588	n.a.	n.a.	12.3973	13.0975	12.9508	13.54	13.7767	12.3434	21.5378	33.932	20.7999	12.3979	11.642	13.5009	92.3143	104.022	55.8781	54.9031	51.7242	57.6179	50.5352	51.4513	56.0819	46.6993	100.099	110.668	110.891	105.32	110.825	103.374	245.419	130.202	675.651	124.016	256.636	147.479	6.52352	41.3085	52.414	28.4216	23.5593
Smp_050360	Chr_4.unplaced.SC_0032	364961	2951	Chr_UP	Sjp_0018690	SJC_S000092	195828	0.869	n.a.	n.a.	77.7854	68.1096	73.4408	97.0089	85.3268	69.1083	119.148	76.2977	98.8421	69.0231	66.1401	67.1631	54.1133	54.6259	40.7312	28.5184	27.9885	35.3875	41.4424	25.1306	43.0309	25.5031	51.7573	65.5476	41.7953	57.7315	47.7983	41.7217	94.5416	50.101	108.715	49.0761	82.6353	47.4509	19.6774	23.4913	19.3455	12.6049	12.0081
Smp_050380	Chr_4.unplaced.SC_0032	280162	62552	Chr_UP	Sjp_0018650	SJC_S000092	3315	39.527	n.a.	n.a.	4.84076	3.26703	2.48219	3.60898	4.3925	1.74743	0.259324	0.0409956	0.209938	0.632831	0.571491	0.393093	0.543917	0.335148	0.160358	0.226855	0.0962798	0.281916	0.282847	0.21556	0.310241	0.146378	29.0854	21.5266	19.6518	25.8454	15.6543	10.5683	1.91118	4.14507	0.476771	3.9054	1.53865	2.89627	0	2.66378	0.803959	1.31034	0
Smp_050430	Chr_4	25556969	6489	Chr_4	Sjp_0041440	SJC_S000326	138071	4.022	n.a.	n.a.	15.0882	17.2641	17.8101	20.9599	17.6803	17.2094	28.9791	36.4617	26.6045	19.2114	16.8493	18.0175	8.88508	8.62092	7.99189	8.89881	7.62375	25.6472	23.391	11.9157	15.3432	11.2539	25.0716	35.3847	29.4804	29.5718	30.7834	29.0679	66.8505	39.3174	152.19	36.3238	65.2497	40.0405	15.1761	84.6491	89.9375	30.9803	51.3118
Smp_050470	Chr_4	25307789	30008	Chr_4	Sjp_0046360	SJC_S000405	218356	30.801	Aut_Shared	Aut_Shared	3.82826	2.72851	2.57927	3.61131	2.53891	2.28025	3.83645	1.64844	3.77652	1.9006	1.97453	1.90761	2.30608	2.24461	1.45645	1.68318	1.28541	2.58018	1.6757	1.42524	2.64304	1.31725	31.2392	27.8069	22.2369	19.2974	21.4586	17.6949	31.049	13.8446	24.2318	14.6383	33.4131	14.8106	10.0208	8.02295	9.26005	6.94185	20.5375
Smp_050540	Chr_4	24963701	15923	Chr_4	Sjp_0090850	SJC_S002332	17489	21.792	Aut_Shared	Aut_Shared	1.82345	1.63431	1.87746	2.22064	2.10105	1.80164	3.55156	2.63975	3.6409	2.10339	2.37372	2.52248	3.16997	2.85148	2.62265	2.40662	0.990592	1.34974	0.955189	0.701262	1.16576	1.44459	12.8711	15.9482	12.0477	14.7674	13.8652	12.6335	29.4053	15.5936	39.5546	17.4232	31.345	20.322	0	4.40198	6.93597	2.25592	0
Smp_050570	Chr_4	6685284	8514	Chr_4	Sjp_0039950	SJC_S000305	104952	2.774	Aut_Shared	Aut_Shared	93.7333	84.2373	83.7208	97.7928	91.5101	75.5891	140.54	126.712	106.537	91.6835	100.803	102.893	18.7178	10.8419	12.8834	16.4112	15.9325	11.4888	10.6091	11.6799	18.4328	12.8265	229.217	232.367	202.233	213.027	207.047	181.39	366.264	214.808	610.688	240.28	304.694	266.374	214.716	19.2935	17.4493	21.5847	86.9347
Smp_050630	Chr_4	5516086	19002	Chr_4	Sjp_0035140	SJC_S000247	94590	22.41	Aut_Shared	Aut_Shared	4.25946	4.69912	4.79761	3.26101	3.6342	4.33446	3.88018	1.80771	3.57298	4.71023	5.1414	5.2962	5.14176	5.28526	3.21753	4.32908	7.70466	5.98868	6.63201	8.39317	6.97129	6.66371	65.3308	48.9644	64.7182	52.2803	73.7369	65.8055	53.8636	58.4325	45.5079	66.5965	54.2711	68.5855	5.23062	44.5201	48.2928	61.3537	17.7629
Smp_050640	Chr_4	5541786	19562	Chr_4	Sjp_0085260	SJC_S001800	373	8.68	Aut_Shared	Aut_Shared	7.46406	6.81881	7.71865	4.75099	4.8781	6.19844	7.00586	3.87373	6.40698	7.27237	8.59272	8.18318	2.23723	1.5112	1.49992	2.58378	4.3981	5.74681	4.77608	6.72049	4.05441	6.13047	52.739	32.826	45.9471	30.7254	56.678	41.9831	42.3843	39.5387	45.6438	47.9247	42.2562	50.5624	13.5688	41.3553	56.854	56.6927	15.3265
Smp_050700	Chr_4	5917834	15030	Chr_4	Sjp_0115510	SJC_S008538	16757	11.025	Aut_Shared	Aut_Shared	6.18988	9.01715	6.92959	6.88296	7.53407	7.64979	7.16626	3.95616	6.50995	6.94906	6.06189	6.37157	9.77007	6.87188	9.83815	12.907	4.62711	8.02963	7.22815	6.27984	7.15755	6.96861	37.8052	44.3823	55.2454	43.7415	44.2584	48.4044	49.214	43.141	49.6308	37.398	48.7373	41.8064	19.8867	21.9553	16.3692	14.5452	13.6706
Smp_050730	Chr_4	5991012	13131	Chr_4	Sjp_0115120	SJC_S008454	288	22.803	Aut_Shared	Aut_Shared	6.13701	4.13497	4.03555	5.54845	4.1224	3.92816	5.09115	3.06752	5.72039	4.45101	4.81833	4.74112	6.33887	6.27751	4.36771	5.26156	4.24795	6.42102	6.0751	4.44438	6.45775	4.94912	26.2009	24.0184	17.4016	16.9916	17.3909	16.6063	22.2643	18.1303	25.567	19.744	27.8799	20.4648	1.79558	17.1357	14.9561	14.13	15.0857
Smp_050740	Chr_4	6009967	10372	Chr_4	Sjp_0083000	SJC_S001692	1873	51.819	Aut_Shared	Aut_Shared	3.20488	4.0397	3.47504	2.83139	3.98	3.41509	2.49152	0.833894	2.47793	2.84828	2.29055	2.21232	14.5787	13.041	8.7795	9.29582	6.95397	6.88046	6.40427	8.61257	5.32834	10.8518	29.5637	26.381	37.3152	35.4054	34.0977	32.494	23.9953	25.2675	14.1716	20.7608	26.1708	20.9704	15.4799	19.0648	19.8277	28.6205	0
Smp_050880	Chr_6	13939050	2860	Chr_6	Sjp_0018190	SJC_S000088	438004	3.117	Aut_Shared	Aut_Shared	7.62131	8.05574	6.4568	6.93012	6.30462	7.51085	10.7154	10.8739	9.57473	8.40314	7.93325	8.08469	10.1679	10.4643	7.46779	7.38102	4.5625	9.05612	10.8531	8.83985	6.9329	11.5566	65.5933	53.6013	76.0515	70.2397	57.6378	78.4579	116.975	92.297	249.37	73.59	120.133	98.7367	0	29.2104	44.1396	32.1751	0
Smp_050940	Chr_6	14087884	910	Chr_6	Sjp_0018120	SJC_S000088	269899	0.349	Aut_Shared	Aut_Shared	457.291	448.572	402.153	515.654	481.231	377.904	677.172	887.214	765.456	228.904	232.86	234.951	973.357	1161.65	1145.05	684.963	306.167	1034.02	978.946	325.054	856.265	469.959	284.807	315.384	291.13	329.701	258.166	255.847	1339.5	372.725	2940.63	385.277	1586.12	408.037	209.93	722.994	832.032	219.364	778.932
Smp_051000	Chr_6	14218846	67303	Chr_6	Sjp_0018080	SJC_S000088	61096	62.34	Aut_Shared	Aut_Shared	1.51387	1.15904	1.18516	1.20152	1.25768	1.07531	0.78518	0.177622	0.852385	0.924346	0.812622	0.674422	0.436903	0.565357	0.122677	0.169612	0.468722	0.466714	0.673343	0.334949	1.11575	0.301953	20.6794	16.4793	16.2723	16.6005	17.3845	15.5981	11.6032	12.3816	4.46226	11.4647	13.2929	9.7836	98.2969	9.59082	6.55249	4.80248	39.6613
Smp_051060	Chr_6	14379481	1421	Chr_6	Sjp_0026720	SJC_S000161	504385	10.194	Aut_Shared	Aut_Shared	0.974512	1.33213	1.24692	1.36222	1.07318	1.05557	1.37836	1.57635	1.78515	0.937836	0.94407	1.19119	3.78316	5.63863	3.96163	2.52124	3.83457	0.969519	2.4028	1.6309	5.04705	1.57159	18.25	21.8732	20.5553	16.751	20.9458	20.0969	26.3735	18.9681	56.8218	15.0551	33.8178	20.9158	0	4.84004	12.9951	0	0
Smp_051070	Chr_6	14401061	18148	Chr_6	Sjp_0018100	SJC_S000088	166271	4.975	n.a.	n.a.	3.29909	3.34762	3.40665	2.93222	3.46139	4.38428	3.79663	2.90429	3.48228	2.79037	3.65395	3.88429	0.566602	0.594726	0.334638	0.317412	0.221236	0.182193	0.102622	0.174137	0.162724	0.135362	19.95	19.0802	18.5047	19.6678	22.6584	26.0092	24.5363	17.864	38.3586	23.4794	26.3648	24.3429	11.7639	0.828646	1.75436	3.28336	7.60325
Smp_051080	Chr_6	14423352	11119	Chr_6	Sjp_0026700	SJC_S000161	470683	6.682	Aut_Shared	Aut_Shared	20.1029	18.9808	19.3993	22.7971	20.5564	22.6975	33.5933	36.6186	31.4391	25.7536	25.3847	26.8878	19.8359	20.0752	10.7794	11.1195	16.3911	14.5463	12.2272	14.4763	17.2255	17.5742	156.052	168.08	153.308	157.831	152.936	178.676	279.455	201.782	551.186	197.774	291.182	216.881	93.7151	70.1485	63.6741	42.1615	48.2589
Smp_051220	SC_0062	499000	1923	Chr_UP	Sjp_0070970	SJC_S000996	154558	3.59	n.a.	n.a.	3.0078	2.99758	3.43004	3.43831	3.61168	3.56442	1.76447	2.14403	2.87921	2.736	4.05834	6.07386	3.6211	3.25342	4.96778	2.75807	3.20639	3.15227	0.968479	4.6015	0.219383	3.13557	7.41234	11.928	7.81975	9.6819	10.6749	13.4453	8.67806	10.9952	16.4819	17.1024	13.9318	25.4559	0	1.91346	2.52765	2.45786	0
Smp_051260	SC_0062	429617	2196	Chr_UP	Sjp_0006150	SJC_S000019	502773	1.208	n.a.	n.a.	944.29	862.628	772.958	899.662	860.685	604.278	1218.46	2303.88	1414.13	429.749	462.847	498.176	802.903	774.436	1066.13	933.674	212.216	1159.62	1009.22	365.721	539.638	547.933	974.027	959.197	886.263	842.783	874.859	628.85	1833.87	579.463	6538.05	631.469	2324	732.639	2508.37	1924.75	1945.27	848.055	3734.76
Smp_051280	SC_0062	375696	30394	Chr_UP	Sjp_0006170	SJC_S000019	516739	21.535	n.a.	n.a.	4.86374	4.69968	4.03953	5.59506	4.95781	4.24723	3.21958	0.35115	4.07645	4.29347	3.57515	2.95881	2.35276	2.96844	0.910367	1.29547	4.02428	2.38423	2.56333	3.11928	5.21895	2.84352	22.2024	25.0586	21.7301	22.1589	18.9467	18.7686	17.3726	21.4184	3.49276	18.068	24.7048	16.1866	8.23692	16.006	7.23521	12.2854	9.21532
Smp_051360	SC_0049	1523964	12603	Chr_UP	Sjp_0056980	SJC_S000595	36812	5.94	n.a.	n.a.	48.5729	45.9388	48.9058	49.8965	50.5459	58.7034	92.9714	126.397	87.1535	94.408	107.179	112.017	14.8235	14.1145	14.2016	15.4928	17.0437	18.4304	19.9494	16.3658	18.7455	13.9809	139.733	151.283	138.461	148.692	152.476	175.64	266.334	246.275	659.995	281.643	273.703	315.506	0	70.7413	89.7046	48.5942	109.572
Smp_051400	SC_0049	1646018	12318	Chr_UP	Sjp_0057280	SJC_S000610	21576	0.194	n.a.	n.a.	30.0563	23.7732	30.0304	76.641	63.7019	64.461	31.4645	31.3228	9.00511	47.9297	35.8276	32.979	3.16334	5.92849	4.70584	2.71459	2.72397	0.939484	0.95755	2.805	1.74668	1.45038	18.063	11.8085	0	16.5793	5.83062	0	34.9894	31.1932	53.2795	37.5502	28.0225	44.4928	0	1.92038	5.07379	24.668	0
Smp_051510	SC_0239	193769	43442	Chr_UP	Sjp_0027720	SJC_S000169	304183	71.177	n.a.	n.a.	2.24829	2.23907	2.14487	2.13425	2.70116	2.34532	0.715203	0.129009	1.16176	2.11964	1.90796	1.54643	2.34374	2.47943	0.515987	0.847343	2.58451	1.10362	1.20752	2.8759	1.35957	2.34416	14.6086	13.8288	14.3788	17.628	14.8006	15.6033	4.70017	12.9615	1.4938	11.3609	8.37037	10.0275	4.53578	4.03656	3.77059	7.86657	3.04045
Smp_051550	SC_0239	84988	11467	Chr_UP	Sjp_0068470	SJC_S000910	107989	14.727	n.a.	n.a.	3.94468	4.07116	3.63226	4.02887	4.07194	3.46572	4.2778	3.55768	3.78612	3.62823	3.35818	3.22723	3.9613	6.63647	2.71052	1.99713	6.51501	3.43611	4.16859	5.30979	5.22422	4.3235	55.8353	59.0573	54.3378	54.8751	55.09	47.3444	58.8888	49.7273	95.3985	41.1417	56.5899	43.4657	9.6259	5.3083	5.88139	6.27016	0
Smp_051760	Chr_4	3975541	13862	Chr_4	Sjp_0073230	SJC_S001077	958	48.679	Aut_Shared	Aut_Shared	1.29543	1.58431	1.44976	1.22751	1.52322	1.36513	0.56073	0.102638	0.675891	1.02233	1.08186	0.635696	1.02029	0.343116	0.206746	0.542245	1.90335	1.19263	1.20917	1.30708	1.00432	1.56271	9.66751	9.27096	11.7835	11.1897	11.2893	10.276	4.62266	7.75413	1.55159	8.25422	6.14804	5.09966	10.0984	11.4394	7.50293	8.24056	5.68322
Smp_052060	Chr_4	2781058	15673	Chr_4	Sjp_0105240	SJC_S004442	6776	0.458	Aut_Shared	Aut_Shared	56.5835	73.8456	77.4782	61.5584	55.2928	62.5462	39.4804	42.1619	28.9258	38.0307	37.0642	40.7674	15.1911	10.6471	17.8873	18.4978	10.2835	7.47166	7.7634	10.0684	6.67548	11.0001	0	4.84139	0	0	0	0	61.4799	55.4186	96.114	39.5877	40.2113	41.0436	11.6645	57.012	54.2285	63.5072	13.15
Smp_052150	Chr_4	2637046	1244	Chr_4	Sjp_0022360	SJC_S000123	444103	1.244	Aut_Shared	Aut_Shared	16.8393	20.3906	20.5422	17.2515	20.5199	21.1572	11.0173	7.16429	4.44706	11.4751	10.6373	9.34141	10.383	7.20559	10.2299	11.0116	3.45802	2.87941	3.99225	5.4195	3.39127	4.12895	10.0556	10.5348	13.5294	11.0045	13.0667	12.7767	8.06247	6.82728	10.6473	6.73826	3.39998	6.66853	0	0.969658	3.82161	1.24261	7.72683
Smp_052160	Chr_4	2619194	15028	Chr_4	Sjp_0022370	SJC_S000123	450847	11.071	Aut_Shared	Aut_Shared	2.45786	2.36064	1.87769	2.33124	2.26913	1.9045	1.32119	0.451299	0.749545	1.4905	1.47295	1.7219	1.36367	1.52648	0.313301	0.523546	0.89692	0.825071	0.557674	0.757046	1.09483	0.490394	13.7838	13.6016	14.112	11.1	11.4172	9.95456	9.21197	9.43155	5.6767	9.88616	6.45551	11.8513	0	3.43961	5.25959	0.733886	4.55064
Smp_052230	Chr_4	2239784	18507	Chr_4	Sjp_0090430	SJC_S002290	55339	4.831	Aut_Shared	Aut_Shared	18.9541	18.7221	18.0343	12.2817	12.5389	9.87272	2.21714	0.614944	1.32594	5.88263	5.53362	5.75685	9.11787	3.10375	5.91585	7.18732	3.9205	0.789078	1.00631	3.40381	1.16256	4.34409	75.2034	50.5507	72.8165	54.0958	82.7943	41.4114	11.0903	29.0408	7.23187	24.3641	7.86324	28.3088	6.13106	1.70722	1.48798	3.27467	6.74785
Smp_052290	Chr_4	2044260	19614	Chr_4	Sjp_0089370	SJC_S002233	50890	14.444	Aut_Shared	Aut_Shared	0.687771	0.35478	0.330009	0.903134	0.504939	0.332221	0.135553	0.0186979	0.231819	0.172272	0.296128	0.153675	0.888471	0.574524	0.615773	0.616028	0.146215	0.014048	0.0158253	0.182605	0	0.091087	2.88841	3.88445	1.77152	2.57541	1.59833	1.6922	0.867806	1.04511	0.194738	1.7646	1.47233	0.762292	0	0.423649	0	0.542136	0
Smp_052330	Chr_3	14186406	4960	Chr_3	Sjp_0026530	SJC_S000160	223732	4.28	Aut_Shared	Aut_Shared	20.7382	21.6112	16.7674	24.4157	22.1527	17.3271	20.0744	15.649	18.606	14.9934	13.7724	13.0265	13.4717	17.7623	9.82956	9.18473	13.2407	22.9429	20.8392	16.9056	18.5421	18.7753	36.7955	44.3826	36.7118	36.0563	30.1115	32.2342	37.8033	26.5506	55.5203	24.8099	39.3956	24.8926	11.0803	53.3615	46.3411	31.1594	24.9679
Smp_052350	Chr_3	14151539	13758	Chr_3	Sjp_0026540	SJC_S000160	249490	24.238	Aut_Shared	Aut_Shared	6.96761	7.2729	6.62089	6.33107	6.04318	6.82125	3.90591	1.75494	3.59782	5.65176	5.32166	4.81058	5.86117	4.56869	2.36579	3.10446	12.1109	8.09108	8.34766	12.9705	9.47515	9.69062	41.8123	37.8982	44.2249	35.4326	41.892	41.5695	24.925	32.2287	19.8829	30.5775	25.1015	30.2904	19.9741	13.0058	18.6026	25.5376	16.7627
Smp_052500	Chr_4	30623620	3726	Chr_4	Sjp_0020640	SJC_S000112	46568	12.095	Aut_Shared	Aut_Shared	3.64249	2.60565	2.49597	2.8297	3.03178	2.80124	6.9227	7.35748	5.5248	3.64899	3.33747	3.2494	13.5371	19.4815	12.3982	8.8235	17.8952	12.2017	13.6622	15.1538	12.3415	12.8264	54.6679	42.6698	38.722	45.92	42.7793	39.8567	97.9193	44.2471	204.056	42.5065	88.1513	45.7021	40.1829	108.696	58.2169	84.1729	107.102
Smp_052640	Chr_1	27374237	11533	Chr_1	Sjp_0038800	SJC_S000287	46804	9.577	n.a.	n.a.	7.91501	7.38407	7.12013	6.00497	6.47316	7.04512	5.13506	2.32651	3.5115	7.42538	8.1787	7.19858	5.24943	2.8805	3.59729	4.62314	5.2717	4.0854	3.52571	5.58996	3.84087	5.77041	48.1106	38.5539	46.6816	41.3098	50.2074	45.1414	36.5522	46.4548	28.8905	50.5961	27.8218	47.0413	8.12967	6.15364	3.542	4.48293	7.79101
Smp_052710	Chr_1	27588869	1347	Chr_1	Sjp_0131840	SJC_S026109	22883	0.712	Aut_Shared	Aut_Shared	167.733	177.772	189.312	140.661	153.083	172.166	214.492	201.037	176.253	200.859	190.172	208.875	56.3025	63.3138	44.3255	41.6955	29.4876	34.9791	33.4132	34.7228	24.4292	36.3086	173.182	149.776	180.177	149.436	219.532	184.954	234.627	196.524	380.991	181.349	200.803	221.345	0	10.8126	11.3713	6.93012	8.62551
Smp_052730	Chr_6	8545537	36986	Chr_6	Sjp_0025690	SJC_S000152	12184	24.751	Aut_Shared	Aut_Shared	1.17792	1.08696	1.02711	1.30911	1.47334	1.1985	0.456016	0.0436463	0.65289	0.846595	0.777653	0.580287	0.148275	0.108813	0.0341309	0.0607786	0.325663	0.134096	0.0923153	0.279118	0.444847	0.187179	6.90448	7.88924	7.23166	9.36826	6.12414	7.71491	3.12349	5.66794	0.354188	4.88548	4.79685	4.10389	37.645	4.43655	4.06733	9.08429	14.0694
Smp_052740	Chr_6	8531089	4863	Chr_6	Sjp_0025720	SJC_S000152	63106	3.569	Aut_Shared	Aut_Shared	20.876	17.8759	17.214	15.6813	15.667	17.6417	18.2326	13.3182	16.1532	17.6868	18.3513	17.7069	15.2836	14.5354	10.8395	12.2426	5.16013	8.66897	9.63809	5.8487	11.0175	4.36267	50.0331	40.7339	45.25	35.5095	43.5879	42.0797	47.2494	41.4347	62.7627	43.858	48.9092	45.7001	3.87614	19.7687	18.3802	6.33097	0
Smp_052760	Chr_6	8514146	3188	Chr_6	Sjp_0025700	SJC_S000152	48002	0.266	Aut_Shared	Aut_Shared	84.4356	117.515	94.0785	95.9724	95.2035	97.3058	142.017	243.674	107.819	88.1292	101.505	109.463	9.41602	10.3058	13.0779	11.205	3.23848	1.72859	1.16837	1.58607	1.45565	1.12082	62.8951	75.9085	150.013	71.051	56.2213	62.8299	291.862	175.454	816.281	155.175	243.934	205.571	1.6739	1.41979	1.39388	0	2.81166
Smp_052780	Chr_1	27854806	1571	Chr_1	Sjp_0026110	SJC_S000155	123644	2.134	Aut_Shared	Aut_Shared	18.3172	22.0922	19.9169	16.5639	19.3669	20.2377	28.0644	25.4379	27.5611	26.2662	24.3027	28.3901	8.12998	15.9994	4.23489	4.5163	9.58385	11.7511	9.28624	9.78985	8.05616	8.81349	58.0221	58.6532	72.3987	61.146	72.1419	66.097	99.6076	89.6841	161.003	75.3069	110.434	94.2873	37.2279	56.2645	53.7306	41.4972	32.9235
Smp_052790	Chr_1	27810854	25695	Chr_1	Sjp_0026100	SJC_S000155	57121	52.236	Aut_Shared	Aut_Shared	3.39014	3.22264	2.78066	2.98064	3.02904	2.5527	3.34915	0.89962	3.90461	2.22634	1.98823	1.79972	1.93211	1.88238	1.35304	2.32248	4.34726	2.9811	2.22273	2.09904	3.97328	3.30269	24.5319	21.7086	22.9524	21.7463	20.936	19.169	25.3303	15.3922	12.1426	13.8321	33.3792	13.4984	3.47663	14.0079	7.72119	7.54659	2.92041
Smp_052810	Chr_1	27746375	22727	Chr_1	Sjp_0026090	SJC_S000155	20650	29.098	Aut_Shared	Aut_Shared	5.09879	4.64929	3.90877	5.66893	5.36108	4.92736	10.1208	7.47158	9.77122	7.52526	6.83068	7.49818	6.6168	5.55071	4.14334	4.51901	8.18323	4.06147	4.02901	6.95262	5.14186	8.24427	68.7222	79.0004	63.7066	69.2063	55.8618	63.3263	131.503	91.2366	174.53	83.784	139.346	95.4892	36.4036	16.5424	15.8807	24.4584	14.5615
Smp_052870	Chr_3	983519	8564	Chr_3	Sjp_0042970	SJC_S000347	59705	7.253	n.a.	n.a.	22.4208	25.1523	23.44	32.6059	26.6474	26.3438	32.7747	26.4003	32.2759	24.015	23.3494	24.447	29.3895	23.8685	29.4011	28.3857	12.4908	21.2991	17.941	19.4102	18.4237	19.7663	83.5832	132.871	94.6947	107.788	96.0492	106.832	174.243	109.699	251.636	110.542	186.831	120.698	39.8088	94.9856	103.764	89.1765	22.4759
Smp_052880	Chr_3	1002964	21668	Chr_3	Sjp_0097680	SJC_S003213	7945	0.308	Aut_Shared	Aut_Shared	320.435	435.91	416.136	175.79	282.841	577.871	157.801	131.529	84.1354	734.753	641.416	699.057	2.07473	1.38458	0.43301	0.512243	3.56033	0.851993	0.730583	4.79355	1.28501	4.00925	202.271	126.623	305.548	192.408	292.824	366.998	154.012	640.038	211.171	552.644	90.3358	640.155	20.8622	1.3654	1.43737	3.88766	7.90487
Smp_052890	Chr_3	1091353	18621	Chr_3	Sjp_0047760	SJC_S000423	240173	23.349	Aut_Shared	Aut_Shared	0.749188	0.757176	0.635126	0.684847	0.676785	0.77847	1.02105	1.00631	0.953966	0.650636	0.532391	0.50888	3.03812	2.03554	2.06309	1.9655	2.21007	3.83245	3.5172	1.75371	4.41789	2.13476	20.5963	17.5295	18.0743	17.1211	16.3073	19.9212	43.8755	29.9755	95.8275	22.1584	47.0245	19.3838	7.00663	49.2857	41.3306	15.3321	11.9621
Smp_052910	Chr_3	1152766	5787	Chr_3	Sjp_0047790	SJC_S000423	294590	3.423	Aut_Shared	Aut_Shared	61.8922	62.0532	61.3102	53.9679	59.6001	57.5616	66.8893	79.6882	61.5845	75.2951	81.5733	94.4085	50.3693	40.987	54.682	54.4011	62.8381	25.3778	25.7458	49.0756	37.6895	46.54	300.07	274.395	329.314	284.294	308.112	282.797	370.61	371.69	793.877	405.114	359.136	504.469	49.6068	66.0353	62.591	72.8423	42.2408
Smp_053020	Chr_5	1813678	11965	Chr_5	Sjp_0082350	SJC_S001634	36345	19.594	Aut_Shared	Aut_Shared	0.760501	0.836899	1.0339	0.544061	0.90988	0.823759	0.822909	0.654712	0.646407	0.822111	1.07783	0.932927	3.09685	4.09441	2.6861	2.28976	2.92418	1.612	1.53058	1.84887	3.17331	2.05311	12.4821	7.22366	14.1537	14.8375	17.1734	14.4057	12.4574	12.3679	20.0385	16.1645	12.2218	14.6169	6.75042	2.15069	2.82123	0.918096	5.69868
Smp_053030	Chr_5	1830277	6148	Chr_5	Sjp_0082340	SJC_S001634	25690	9.712	Aut_Shared	Aut_Shared	22.0363	21.2639	20.45	18.8333	19.233	19.3443	26.4806	23.6786	21.7055	21.9395	24.8144	25.1944	30.9564	35.2359	31.2378	28.7942	11.895	20.3919	22.4165	15.3523	19.6939	15.2563	72.845	62.6381	69.6322	61.1116	70.3602	64.227	89.9666	67.4059	144.413	74.7029	81.6112	81.8521	10.4202	45.0072	55.1749	30.2383	17.5987
Smp_053060	Chr_5	1914520	27897	Chr_5	Sjp_0076610	SJC_S001277	112	11.53	Aut_Shared	Aut_Shared	8.70958	7.73332	7.44143	5.60826	5.85112	6.96161	6.35294	4.56757	5.18946	9.99544	10.306	12.5587	8.33154	8.69258	5.22098	6.22989	7.49423	3.60509	3.76077	6.13237	4.18895	6.28412	73.0949	52.7285	73.2148	54.0363	69.6214	64.6041	59.7848	86.3286	76.2581	89.3966	53.4867	114.747	0	25.2568	26.888	14.9462	0
Smp_053120	SC_0041	934374	9645	Chr_UP	Sjp_0074080	SJC_S001150	1052	10.115	n.a.	n.a.	0.661865	0.58261	0.562876	0.832036	0.540782	0.618163	0.535154	0.440553	0.518139	0.621475	0.79287	0.748695	1.75068	2.23807	1.08597	0.739268	0.356809	0.314247	0.321822	0.327656	0.787324	0.185234	7.60991	7.16387	5.80821	5.30847	5.69891	4.57722	6.57025	7.53453	10.7743	9.94387	8.50018	9.74725	0	4.48052	1.96812	1.91651	0
Smp_053130	SC_0041	916671	3968	Chr_UP	Sjp_0074090	SJC_S001150	11437	4.695	n.a.	n.a.	207.221	187.405	175.725	200.438	198.364	150.987	379.712	636.036	394.949	147.699	142.234	149.509	376.663	367.131	445.503	324.758	98.6909	252.344	236.084	91.8022	251.126	103.557	824.095	834.865	753.26	785.959	745.523	626.978	1848.5	660.703	5666.23	644.629	2137.43	714.106	101.939	670.671	521.846	237.106	161.74
Smp_053160	SC_0041	847453	9422	Chr_UP	Sjp_0074120	SJC_S001150	91394	8.416	n.a.	n.a.	12.7277	11.3863	11.9726	10.8501	12.1565	11.1098	10.4416	3.64225	8.40698	11.5775	11.6893	11.1084	3.14768	2.18231	1.16599	1.74839	1.96324	1.90086	1.84486	2.16899	2.41787	2.03839	43.1555	37.5698	38.6315	42.5742	43.4932	37.5147	49.4366	50.9228	29.9664	53.0547	44.244	51.626	0	5.48715	0	3.51536	0
Smp_053190	SC_0041	604145	23997	Chr_UP	Sjp_0129560	SJC_S024443	122	1.144	n.a.	n.a.	3.39798	3.13558	3.00925	4.04618	2.65638	2.28795	0.805399	0.118039	0.890803	1.94613	2.33679	1.25548	0.144337	0.0625102	0.0853057	0.153688	0.125484	0.137786	0.206957	0.737483	0.0527409	0.362945	4.21399	7.08392	3.58962	4.97295	4.27506	4.11467	2.33223	7.27717	0.710273	7.15119	3.73569	5.18994	0	0.676683	1.7749	1.73301	0
Smp_053230	SC_0041	476380	7701	Chr_UP	Sjp_0084100	SJC_S001751	90	4.362	n.a.	n.a.	9.50582	10.8668	9.53135	13.4736	11.379	13.4678	11.6439	10.6803	10.3797	18.3744	19.1825	22.959	48.9589	36.9858	36.5857	37.0126	65.7659	54.7783	47.3597	132.494	38.6211	126.61	112.895	175.284	142.114	141.04	119.447	170.403	164.882	274.386	253.449	264.492	160.546	339.877	148.845	207.926	238.614	664.255	50.5055
Smp_053520	Chr_4	14559435	1802	Chr_4	Sjp_0051970	SJC_S000492	84270	2.613	Aut_Shared	Aut_Shared	0.743835	0.490283	0.304034	0.536806	0.155065	0.333897	0.0881531	0	0	0.451078	0.204615	0.149908	0.70077	0.162427	0.0568002	0.194919	0.0795742	0	0	0	0	0	0.517054	0.676039	0.493297	0.0949166	0.400564	0.353407	0.114465	0.416689	0	0.245685	0	0.191041	0	0	1.05809	0	0
Smp_053550	Chr_4	14463601	1100	Chr_4	Sjp_0052010	SJC_S000492	178076	0.893	Aut_Shared	Aut_Shared	65.7796	78.043	65.8327	62.9868	75.547	69.6935	95.3103	100.105	60.3198	64.0883	71.2479	72.9612	91.2487	106.467	62.7151	48.8228	28.4178	35.5693	31.3219	33.9008	29.1477	42.2283	56.6058	56.4129	64.506	58.6528	61.8811	56.2297	82.7071	49.9627	160.585	57.6792	59.325	65.2228	19.026	28.3701	24.9029	17.3295	0
Smp_053610	Chr_4	14284419	17430	Chr_4	Sjp_0052070	SJC_S000492	316469	25.988	Aut_Shared	Aut_Shared	9.86397	8.09444	7.46916	11.7501	9.92384	8.93018	12.3069	5.74168	12.5203	10.4012	9.98318	9.54102	23.5253	21.0704	18.4429	20.7018	18.4198	19.1754	15.2082	19.5453	14.8128	25.5995	126.193	152.77	106.021	129.754	102.508	116.854	157.542	120.986	134.896	117.982	176.791	118.308	95.4008	97.2015	93.2777	96.2905	78.0816
Smp_053640	Chr_4	14186543	5604	Chr_4	Sjp_0132030	SJC_S026162	368	12.666	Aut_Shared	Aut_Shared	0.835469	0.849623	0.846751	0.775203	0.815746	0.826596	0.66379	0.0959517	0.310337	0.837518	0.854795	0.577286	9.58003	8.96388	7.11705	8.17938	2.37964	2.95008	5.37269	2.63166	4.36629	2.43088	7.35064	6.13676	8.44278	6.92079	8.56823	7.14306	7.46314	7.76232	3.18202	10.7125	4.70697	7.99251	2.63272	4.47028	8.78788	2.86127	4.43504
Smp_053700	Chr_4	13971295	433	Chr_4	Sjp_0134820	SJC_S028071	86094	0.265	Aut_Shared	Aut_Shared	918.442	961.074	1054.26	904.063	915.109	959.17	1249.94	1897.64	1092.69	919.706	972.473	992.823	604.688	613.356	570.708	436.499	261.948	227.811	258.067	368.817	222.142	322.348	1082.25	972.832	1085.73	956.443	1170.78	1004.62	1811.08	1311.21	5702.94	1396.37	1931.39	1488.26	239.203	133.688	121.243	133.591	247.907
Smp_053800	Chr_4	31914898	7263	Chr_4	Sjp_0053830	SJC_S000534	12106	13.929	Aut_Shared	Aut_Shared	1.19384	1.14048	0.941078	0.926456	1.13449	0.86648	0.967415	1.02763	1.01382	0.413696	0.786883	0.749916	6.20453	4.60923	4.5331	5.15524	5.46878	3.86958	3.41894	5.30841	5.51811	4.45846	24.1361	18.5229	25.0296	16.856	17.9531	16.8557	20.9084	11.4774	52.0019	13.4008	24.0131	17.4479	0	9.9399	5.93331	8.10454	14.3921
Smp_053820	Chr_4	31672093	7806	Chr_4	Sjp_0019480	SJC_S000102	10835	2.812	Aut_Shared	Aut_Shared	166.962	172.941	157.786	177.33	165.057	153.531	358.049	604.493	352.722	187.083	201.448	210.11	69.1781	62.8761	76.0946	87.0549	39.8803	99.4348	94.0815	42.2392	80.4728	48.2063	253.567	273.266	253.515	240.642	254.2	240.948	540.138	263.514	1656.68	281.767	584.327	316.848	30.7886	268.043	264.041	97.1044	119.454
Smp_053830	Chr_4	31664233	560	Chr_4	Sjp_0019470	SJC_S000102	5942	0.491	Aut_Shared	Aut_Shared	1192.4	1103.68	982.939	1114.43	1049.27	735.056	1846.74	4009	2231.18	604.67	677.034	711.087	1859.07	2337.7	2942.49	1880.59	401.756	1653.72	1504.87	602.328	1178.23	753.714	980.238	903.593	895.615	838.312	841.428	618.238	1742.93	529.927	6926.41	596.696	2360.73	658.883	184.743	1687.82	1782.4	641.625	941.435
Smp_053990	Chr_4	31249030	5361	Chr_4	Sjp_0113670	SJC_S008022	4990	6.975	Aut_Shared	Aut_Shared	8.26687	9.51419	8.02983	9.19028	10.3402	7.73446	7.69465	2.65232	4.73796	5.18219	5.11662	5.7095	13.0764	17.2253	5.89317	5.59526	9.41508	9.97094	8.56908	10.8859	14.0074	9.28949	24.1817	26.7849	25.942	28.7863	24.0648	22.3023	26.4746	15.5003	16.695	16.0563	17.365	18.7927	7.22715	11.5156	9.06623	14.7494	24.4222
Smp_054120	SC_0166	420357	9502	Chr_UP	Sjp_0061080	SJC_S000696	81935	5.519	n.a.	n.a.	15.1434	12.2563	11.7316	22.9501	18.5377	15.7031	20.6387	19.4272	21.3138	16.0886	15.3791	16.3478	15.6818	15.5865	15.2242	11.6477	12.4348	9.71427	9.99596	8.95769	13.9411	9.70661	88.2687	134.037	69.6227	97.3319	66.5073	90.9947	137.414	85.6971	240.684	80.7933	162.17	96.6768	7.26025	54.1783	69.3747	33.7731	12.4047
[truncated: 6,387 more rows]
[truncated: 5 more columns]
