# Supplementary material for: Evolution of gene dosage on the Z-chromosome of schistosome parasites
Source: eLife. 2018 Jul 25;7:e35684. doi: 10.7554/eLife.35684 (PMC6089595; doi:10.7554/eLife.35684)
Supplement: Figure 4—source data 1. [file elife-35684-fig4-data1.xlsx]

## Sheet: Figure 4-source data 1
Figure 4-source data 1: Proteomic data with imputed values - GONADS
Majority protein IDs	Fasta headers	Razor + unique peptides	Mol. Weight [kDa]	P-Value	(-)log10(P-Value)	logFC	Enrichment	Significant	log2(iBAQ FG-G)	log2(iBAQ FG-H)	log2(iBAQ FG-B)	log2(iBAQ MG-K_2)	log2(iBAQ MG-M)	log2(iBAQ MG-L)
A0A0R5RJE0;A0A146MG63;G4V9Z0;G4VCP4;O96413;Q6RYS0	tr|A0A0R5RJE0|A0A0R5RJE0_SCHMA Ubiquitin (Fragment) OS=Schistosoma mansoni PE=2 SV=1;tr|A0A146MG63|A0A146MG63_SCHMA Uncharacterized protein OS=Schistosoma mansoni GN=c12516_g1_i1 PE=4 SV=1;tr|G4V9Z0|G4V9Z0_SCHMA Putative ubiquitin (Ribosomal protein L40) O	8	17.111	0.0234699	1.62949	-0.734533	1.66386	FALSE	24.9357487799182	25.3681504730279	24.8204379187618	25.81082550326	25.9499044127527	25.5672076201987
A0A146MG43	tr|A0A146MG43|A0A146MG43_SCHMA Uncharacterized protein OS=Schistosoma mansoni GN=c18731_g1_i1 PE=4 SV=1	3	9.6581	0.0882934	1.05407	-3.43805	10.8382	FALSE	13.2980158167032	13.5125371649315	19.3932752187498	19.1687670869498	18.8248123512106	18.5244036215212
A0A146MG57	tr|A0A146MG57|A0A146MG57_SCHMA Uncharacterized protein OS=Schistosoma mansoni GN=c12741_g1_i1 PE=4 SV=1	1	9.8203	0.352534	0.452799	0.333205	1.25981	FALSE	20.1738279632101	20.4277621032493	19.6778887612651	20.0677728200816	19.2530984799979	19.9589912278937
A0A146MG80	tr|A0A146MG80|A0A146MG80_SCHMA Uncharacterized protein OS=Schistosoma mansoni GN=c8380_g1_i4 PE=4 SV=1	5	5.1138	0.00254296	2.59466	-0.918229	1.88979	FALSE	22.518248247115	22.6195224827041	22.4102063351248	23.4750879764608	23.40262970395	23.4249469573519
A0A146MG97	tr|A0A146MG97|A0A146MG97_SCHMA Uncharacterized protein OS=Schistosoma mansoni GN=c7392_g1_i1 PE=4 SV=1	4	46.504	0.000100021	3.99991	2.37764	5.19686	TRUE	18.0879028252323	17.9175494413457	17.7709927061863	15.6118631870449	15.8570185381316	15.1746458816635
A0A146MGA0	tr|A0A146MGA0|A0A146MGA0_SCHMA Uncharacterized protein OS=Schistosoma mansoni GN=c7489_g1_i1 PE=4 SV=1	6	39.502	0.0110682	1.95592	-0.686749	1.60965	FALSE	20.2338444663336	20.3156338073434	20.3527852280831	21.0298480040868	21.0947348690617	20.83792647808
A0A146MGA2	tr|A0A146MGA2|A0A146MGA2_SCHMA 60S ribosomal protein L18a OS=Schistosoma mansoni GN=c7587_g1_i1 PE=3 SV=1	4	21.123	0.608214	0.215944	0.391793	1.31202	FALSE	20.2973463009684	20.0803407377451	20.2188460767164	19.6549816600439	18.4321484492375	21.334024858699
A0A146MGA3	tr|A0A146MGA3|A0A146MGA3_SCHMA Uncharacterized protein OS=Schistosoma mansoni GN=c7743_g1_i1 PE=4 SV=1	2	6.2422	0.000713394	3.14667	2.7596	6.77206	TRUE	22.7226701478807	22.8117250078744	22.1254714806876	19.0406974238553	19.8928871703543	20.447496010849
A0A146MGA5	tr|A0A146MGA5|A0A146MGA5_SCHMA Uncharacterized protein OS=Schistosoma mansoni GN=c6969_g1_i1 PE=4 SV=1	8	42.552	0.0776769	1.10971	-0.522228	1.43617	FALSE	22.5249196420075	22.0396234736923	21.9061715972579	22.780624767329	22.5092711366916	22.7475023261141
A0A146MGC1	tr|A0A146MGC1|A0A146MGC1_SCHMA Uncharacterized protein OS=Schistosoma mansoni GN=c6749_g1_i1 PE=4 SV=1	3	13.994	0.474065	0.324162	-0.292977	1.22517	FALSE	21.5087468279385	21.8407149164353	22.3887527331369	22.1243137329452	21.6965483970956	22.7962818477623
A0A146MGC6	tr|A0A146MGC6|A0A146MGC6_SCHMA Uncharacterized protein OS=Schistosoma mansoni GN=c6091_g2_i1 PE=4 SV=1	2	6.8459	0.264301	0.577902	0.27497	1.20997	FALSE	21.4626433135593	21.7046586572798	21.9176835106605	21.6144972464139	21.3916575560155	21.2539192095924
A0A146MGD1	tr|A0A146MGD1|A0A146MGD1_SCHMA Uncharacterized protein OS=Schistosoma mansoni GN=c6369_g1_i1 PE=3 SV=1	3	15.85	0.0139118	1.85662	3.52225	11.4896	FALSE	19.5200461249894	18.8811964156223	19.0598365887676	13.2833653882194	17.0297477756366	16.5812073643549
A0A146MGD3	tr|A0A146MGD3|A0A146MGD3_SCHMA Uncharacterized protein OS=Schistosoma mansoni GN=c6164_g1_i2 PE=4 SV=1	2	7.2043	0.518309	0.285411	-0.176617	1.13023	FALSE	21.3288532200589	21.0751246194851	20.9056122324531	21.5223087376496	21.4171039037964	20.9000293326635
A0A146MGD5	tr|A0A146MGD5|A0A146MGD5_SCHMA Uncharacterized protein OS=Schistosoma mansoni GN=c5016_g1_i1 PE=3 SV=1	4	7.6928	0.00138221	2.85943	1.44471	2.72208	TRUE	25.5425495360293	25.2762246029228	24.9218847088075	23.7946348910048	24.0239696337603	23.5879227529864
A0A146MGD6	tr|A0A146MGD6|A0A146MGD6_SCHMA Uncharacterized protein OS=Schistosoma mansoni GN=c5482_g1_i1 PE=4 SV=1	7	14.04	0.369469	0.432422	-0.235462	1.17728	FALSE	21.5604941068386	21.5185275671725	21.064137075334	21.8367153441508	21.3965443711389	21.6162843380954
A0A146MGE6	tr|A0A146MGE6|A0A146MGE6_SCHMA Uncharacterized protein OS=Schistosoma mansoni GN=c4298_g1_i1 PE=4 SV=1	1	7.6088	0.279241	0.554021	-0.314056	1.2432	FALSE	21.1828326998564	21.6363250200339	21.7292857299861	21.4959497966296	22.029258406539	21.9654042305357
A0A146MGF3	tr|A0A146MGF3|A0A146MGF3_SCHMA Uncharacterized protein OS=Schistosoma mansoni GN=c4561_g1_i1 PE=4 SV=1	2	17.239	0.334047	0.476192	1.47936	2.78825	FALSE	18.2342743368494	18.7185017411234	18.5558160215004	18.583247516011	18.7964004569962	13.6908642669623
A0A146MGG9	tr|A0A146MGG9|A0A146MGG9_SCHMA Uncharacterized protein OS=Schistosoma mansoni GN=c2964_g1_i1 PE=4 SV=1	5	10.738	0.00894707	2.04832	-1.38076	2.60406	TRUE	20.8177151816874	19.9725277140065	20.7610701776308	21.3925499613962	22.0599058896995	22.2411480764078
A0A146MGH8	tr|A0A146MGH8|A0A146MGH8_SCHMA Malic enzyme OS=Schistosoma mansoni GN=c1504_g1_i1 PE=3 SV=1	9	47.963	0.751726	0.12394	0.131795	1.09566	FALSE	19.5307462140472	20.5025119420669	20.9054257293127	20.2931626361024	19.9132928197259	20.3368434925804
A0A146MGS0	tr|A0A146MGS0|A0A146MGS0_SCHMA Uncharacterized protein OS=Schistosoma mansoni GN=c6943_g1_i1 PE=3 SV=1	4	14.295	0.155809	0.807407	0.481126	1.39583	FALSE	19.0866581442094	19.744149405165	19.8466874612171	18.7579813857519	19.2542236497999	19.2219132924242
A0A146MGV3	tr|A0A146MGV3|A0A146MGV3_SCHMA Uncharacterized protein OS=Schistosoma mansoni GN=c4946_g1_i1 PE=4 SV=1	2	12.328	0.00520171	2.28385	3.90854	15.0172	TRUE	18.7046887314995	18.555930090921	18.0092895173053	13.2833653882194	16.5700519183035	13.6908642669623
A0A146MHE5;G4VRK0	tr|A0A146MHE5|A0A146MHE5_SCHMA Protein yippee-like OS=Schistosoma mansoni GN=c18726_g1_i1 PE=3 SV=1;tr|G4VRK0|G4VRK0_SCHMA Putative yippee protein OS=Schistosoma mansoni GN=Smp_171850 PE=4 SV=1	2	13.848	0.00204271	2.68979	-1.50461	2.83748	TRUE	18.5298575648231	18.6502953921385	18.5201089281538	19.5416192208527	20.2858924514786	20.3865877359684
A0A146MHK8	tr|A0A146MHK8|A0A146MHK8_SCHMA Uncharacterized protein OS=Schistosoma mansoni GN=c8120_g1_i2 PE=4 SV=1	2	14.893	0.038349	1.41625	-3.30951	9.91432	FALSE	17.5464093556205	13.5125371649315	18.1636025714972	19.525714675805	19.4893623883812	20.1360134159434
A0A146MHL9	tr|A0A146MHL9|A0A146MHL9_SCHMA Uncharacterized protein OS=Schistosoma mansoni GN=c7454_g2_i1 PE=4 SV=1	3	8.4437	0.0142136	1.8473	-1.13773	2.20035	FALSE	20.5900544188219	20.7557912298425	20.6524651938142	22.2154748557663	22.0485668606119	21.1474657931679
A0A146MHN9	tr|A0A146MHN9|A0A146MHN9_SCHMA Uncharacterized protein OS=Schistosoma mansoni GN=c6528_g1_i1 PE=4 SV=1	2	9.0749	0.141766	0.848428	-2.21474	4.64199	FALSE	15.4167667918265	16.5785260967371	13.7208770455038	15.7910105793062	16.532342845425	20.0370494849634
A0A146MHS2	tr|A0A146MHS2|A0A146MHS2_SCHMA Uncharacterized protein OS=Schistosoma mansoni GN=c4297_g1_i1 PE=3 SV=1	4	14.625	0.280484	0.552092	0.256641	1.19469	FALSE	21.1719132359347	21.1878338502613	21.2860162158704	21.2425498076708	20.7291547843271	20.9041360106665
A0A146MHV0;A0A146MGH5	tr|A0A146MHV0|A0A146MHV0_SCHMA MICOS complex subunit MIC10 OS=Schistosoma mansoni GN=c797_g1_i1 PE=3 SV=1;tr|A0A146MGH5|A0A146MGH5_SCHMA MICOS complex subunit MIC10 OS=Schistosoma mansoni GN=c797_g1_i2 PE=3 SV=1	6	9.8944	0.0220787	1.65603	1.10738	2.15454	FALSE	22.8501145945932	22.6650522913373	22.8409890929503	22.416636917197	21.2705945630095	21.3467759642392
A0A146MHY2	tr|A0A146MHY2|A0A146MHY2_SCHMA Uncharacterized protein OS=Schistosoma mansoni GN=c19920_g1_i1 PE=4 SV=1	2	17.11	0.086122	1.06489	-0.497928	1.41218	FALSE	18.2160416122266	17.7104501907422	18.2124227558422	18.3584806428107	18.744772745142	18.5294441085389
A0A146MI27	tr|A0A146MI27|A0A146MI27_SCHMA Uncharacterized protein OS=Schistosoma mansoni GN=c8413_g1_i2 PE=4 SV=1	7	42.786	0.184994	0.732842	2.2834	4.86825	FALSE	18.0380920112812	16.9228206927436	17.1592918198729	13.2833653882194	13.3388459562242	18.6477834769587
A0A146MI59;A0A146MJ85	tr|A0A146MI59|A0A146MI59_SCHMA Uncharacterized protein OS=Schistosoma mansoni GN=c7360_g1_i1 PE=4 SV=1;tr|A0A146MJ85|A0A146MJ85_SCHMA Uncharacterized protein OS=Schistosoma mansoni GN=c7360_g1_i2 PE=4 SV=1	8	35.707	0.949722	0.0224033	0.0242966	1.01698	FALSE	20.9324029487418	21.570187825704	22.0067446290497	21.4443042726334	21.9052459336086	21.0868952806773
A0A146MI72	tr|A0A146MI72|A0A146MI72_SCHMA Uncharacterized protein OS=Schistosoma mansoni GN=c18052_g1_i1 PE=4 SV=1	4	9.4979	0.924031	0.0343135	0.0541073	1.03822	FALSE	22.2482249723131	20.5000754315129	20.6313071530868	21.2996174742855	20.5566124284895	21.3610558398695
A0A146MID7	tr|A0A146MID7|A0A146MID7_SCHMA Uncharacterized protein OS=Schistosoma mansoni GN=c7393_g1_i1 PE=4 SV=1	5	30.885	0.00666492	2.1762	0.830404	1.77818	FALSE	22.1891573209468	21.8561855351599	22.0460203957895	21.1092736400395	21.3527379293401	21.1381410968306
A0A146MIK5	tr|A0A146MIK5|A0A146MIK5_SCHMA Uncharacterized protein OS=Schistosoma mansoni GN=c2371_g1_i1 PE=4 SV=1	2	8.6421	0.0637747	1.19535	1.08104	2.11557	FALSE	23.0140100912717	22.8624370711248	22.86878028731	22.5340550379542	20.804381625973	22.1636612687714
A0A146MIV7	tr|A0A146MIV7|A0A146MIV7_SCHMA Uncharacterized protein OS=Schistosoma mansoni GN=c11933_g1_i1 PE=3 SV=1	2	9.6468	0.0207592	1.68279	1.57619	2.98181	FALSE	19.4420647068493	19.3062025073952	18.3201647734089	18.1784900795133	17.4991087904472	16.662262019792
A0A146MJ29	tr|A0A146MJ29|A0A146MJ29_SCHMA Uncharacterized protein OS=Schistosoma mansoni GN=c5980_g1_i1 PE=4 SV=1	5	26.937	0.115721	0.936588	-1.4102	2.65773	FALSE	17.9609141609374	20.1822916356012	20.929746325495	21.0843452437436	21.0693214783642	21.1498719388058
A0A146MJ48;A0A146MII8	tr|A0A146MJ48|A0A146MJ48_SCHMA Uncharacterized protein OS=Schistosoma mansoni GN=c3996_g1_i2 PE=4 SV=1;tr|A0A146MII8|A0A146MII8_SCHMA Uncharacterized protein OS=Schistosoma mansoni GN=c3996_g1_i1 PE=4 SV=1	1	8.643	0.0252754	1.5973	-4.10259	17.1792	FALSE	13.2980158167032	18.0807672477119	13.7208770455038	18.4638602669886	18.6745520301085	20.2690269195475
A0A146MJ81	tr|A0A146MJ81|A0A146MJ81_SCHMA Uncharacterized protein OS=Schistosoma mansoni GN=c325_g1_i1 PE=3 SV=1	1	6.7836	0.886342	0.0523988	-0.045972	1.03238	FALSE	19.1076730500327	19.8473286427508	19.541989426521	19.6730809075668	19.841983299814	19.1198430304607
A0A146MJC6	tr|A0A146MJC6|A0A146MJC6_SCHMA Uncharacterized protein OS=Schistosoma mansoni GN=c4805_g2_i1 PE=4 SV=1	4	19.71	3.87939e-05	4.41124	-5.49636	45.1407	TRUE	15.1127318307401	15.5095956387142	13.7208770455038	20.1708497014552	20.4640527392417	20.1973749238183
A0A146MJD6	tr|A0A146MJD6|A0A146MJD6_SCHMA Uncharacterized protein OS=Schistosoma mansoni GN=c3893_g1_i1 PE=4 SV=1	6	8.95	0.0536883	1.27012	-0.894078	1.85842	FALSE	23.3764598046396	24.6402239966512	24.4218744915845	25.1231841949884	24.9573190429493	25.040289763653
A5H658;G4V604	tr|A5H658|A5H658_SCHMA Histone deacetylase OS=Schistosoma mansoni GN=HDAC1 PE=2 SV=1;tr|G4V604|G4V604_SCHMA Histone deacetylase OS=Schistosoma mansoni GN=Smp_005210 PE=3 SV=1	11	58.256	0.881669	0.0546943	-0.0495188	1.03492	FALSE	20.255964473308	20.3499677573318	19.9259633852859	20.2854779397459	20.7046708361943	19.6903032354835
A5HIF3;G4VEQ8	tr|A5HIF3|A5HIF3_SCHMA Nuclear coactivator 1 OS=Schistosoma mansoni GN=NCoA1 PE=4 SV=1;tr|G4VEQ8|G4VEQ8_SCHMA Putative nuclear protein SkiP OS=Schistosoma mansoni GN=Smp_105860 PE=4 SV=1	12	61.622	0.00566037	2.24716	1.231	2.3473	TRUE	20.3820177168029	19.6505658192892	20.0562290312933	18.9723466671813	18.9787252264901	18.4447343978537
A7UAX6;G4LYG5;A7UAX7	tr|A7UAX6|A7UAX6_SCHMA Ornithine aminotransferase OS=Schistosoma mansoni PE=2 SV=1;tr|G4LYG5|G4LYG5_SCHMA Ornithine--oxo-acid transaminase OS=Schistosoma mansoni GN=Smp_000660 PE=3 SV=1;tr|A7UAX7|A7UAX7_SCHMA Ornithine aminotransferase OS=Schistosoma manso	19	48.65	0.133195	0.875513	-0.639178	1.55744	FALSE	22.3366890433459	23.238775118847	22.6415051041601	23.496003499287	22.8403343550876	23.7981668438842
A9NI54;G4M0R9;G4M0S0;G4M0S1;A9NI55	tr|A9NI54|A9NI54_SCHMA 26S proteasome subunit ATPase 3 (Fragment) OS=Schistosoma mansoni GN=RPT5a PE=2 SV=1;tr|G4M0R9|G4M0R9_SCHMA 26S protease regulatory subunit 6a, putative OS=Schistosoma mansoni GN=Smp_042270.2 PE=3 SV=1;tr|G4M0S0|G4M0S0_SCHMA 26S prot	20	45.739	0.0278714	1.55484	0.581932	1.49685	FALSE	22.4594295143888	22.4814792422783	22.363788728884	21.8440469871261	22.0543505930484	21.6605045369006
B1AAM6	tr|B1AAM6|B1AAM6_SCHMA LIMPETin OS=Schistosoma mansoni PE=2 SV=1	26	64.75	5.2464e-06	5.28014	-4.58104	23.9348	TRUE	18.6841162197348	19.2957369144552	19.5571463074784	23.7346067906816	23.6212193852313	23.9242862825269
B2CNV1	tr|B2CNV1|B2CNV1_SCHMA Stomatin-like protein 2 OS=Schistosoma mansoni GN=StoLP-2 PE=2 SV=1	12	39.525	0.342572	0.465248	0.244567	1.18474	FALSE	22.3065422540712	22.2260444193585	22.1682658354006	22.0648553854577	22.2734900587491	21.6288068613478
B4XC67	tr|B4XC67|B4XC67_SCHMA Cathepsin L3 OS=Schistosoma mansoni GN=CL3 PE=2 SV=1	7	41.18	0.222243	0.653171	-0.587351	1.50249	FALSE	17.8593619821099	19.4071435940514	18.4721566735834	19.4533670381002	19.0182387163174	19.0291100047513
B8Y6H3	tr|B8Y6H3|B8Y6H3_SCHMA DIF_5 OS=Schistosoma mansoni GN=Smp_105220 PE=2 SV=1	6	14.191	0.930392	0.0313339	0.0511439	1.03609	FALSE	21.4220738974099	22.8061978690463	22.0964378755121	22.7375168566762	21.0804316941805	22.3533292996744
C1LZ83	tr|C1LZ83|C1LZ83_SCHMA Proteasome activator PA28-gamma OS=Schistosoma mansoni GN=PA28-gamma PE=2 SV=1	10	28.688	0.00195629	2.70857	1.31359	2.48559	TRUE	22.9611289268546	22.6387551279485	22.3286118696195	21.3436920856029	21.4975934074002	21.1464514774189
C1LZY9	tr|C1LZY9|C1LZY9_SCHMA Serine/threonine-protein phosphatase OS=Schistosoma mansoni GN=Smp_165490 PE=3 SV=2	13	35.756	0.411153	0.385997	0.211641	1.158	FALSE	22.0772149221509	22.5421997263616	22.4696612059081	21.8978508294696	22.362788683727	22.1935130500897
C1M000	tr|C1M000|C1M000_SCHMA Ebna2 binding protein P100, putative OS=Schistosoma mansoni GN=Smp_081570 PE=4 SV=1	17	58.268	5.06072e-06	5.29579	3.50036	11.3165	TRUE	22.0303346232504	22.1409647733123	22.1989495420155	18.5311754584295	18.4223421011208	18.9156522884982
C1M001;C4QTD7	tr|C1M001|C1M001_SCHMA Ebna2 binding protein P100, putative OS=Schistosoma mansoni GN=Smp_166110 PE=4 SV=1;tr|C4QTD7|C4QTD7_SCHMA Uncharacterized protein OS=Schistosoma mansoni GN=Smp_118190 PE=4 SV=2	10	42.178	9.95948e-06	5.00176	3.31186	9.93043	TRUE	22.2829221724591	22.3157670287928	22.4038829042081	19.1136294993902	18.6727268981577	19.2806458366782
C1M093	tr|C1M093|C1M093_SCHMA Aspartyl-tRNA synthetase, putative OS=Schistosoma mansoni GN=Smp_088800 PE=4 SV=2	3	47.048	0.346865	0.459839	-1.00665	2.00924	FALSE	17.5015125115567	17.1656188755057	14.2687325628061	18.0100588952313	17.7061411522983	16.2396031592076
C1M0E9	tr|C1M0E9|C1M0E9_SCHMA Uncharacterized protein OS=Schistosoma mansoni GN=Smp_172980 PE=4 SV=2	8	30.671	6.15202e-08	7.21098	7.88136	235.79	TRUE	21.0960763432036	21.3568204418745	21.5042479107204	13.2833653882194	13.3388459562242	13.6908642669623
C1M0J1	tr|C1M0J1|C1M0J1_SCHMA Small nuclear ribonucleoprotein f (Snrnp-f),putative OS=Schistosoma mansoni GN=Smp_094150 PE=4 SV=1	2	14.164	0.130427	0.884633	0.341187	1.2668	FALSE	20.4765458700704	20.2254772553614	20.3040973002391	20.0869146033558	20.0482218585678	19.847424450437
C1M0L0	tr|C1M0L0|C1M0L0_SCHMA Uncharacterized protein OS=Schistosoma mansoni GN=Smp_094630 PE=4 SV=1	9	79.308	0.0322784	1.49109	0.657096	1.57691	FALSE	19.7292949700514	19.5489656483651	19.6107724856108	18.9196825137534	18.6861998010102	19.3118635305888
C1M0Q1	tr|C1M0Q1|C1M0Q1_SCHMA Putative methyltransferase ncl1 OS=Schistosoma mansoni GN=Smp_175950 PE=3 SV=2	17	84.785	0.000103806	3.98378	2.04458	4.12554	TRUE	19.6902513482757	19.5887934242229	19.7079284346897	17.7837837962307	17.3083549853909	17.7610847013796
C1M0Q4	tr|C1M0Q4|C1M0Q4_SCHMA Speckle-type poz protein, putative OS=Schistosoma mansoni GN=Smp_175960 PE=4 SV=2	3	23.415	0.0505895	1.29594	0.732156	1.66112	FALSE	19.6627057183373	19.8393292165286	19.7689029420683	19.1146371374343	19.4695873553277	18.4902449569681
C1M0Q9;C1M0R0	tr|C1M0Q9|C1M0Q9_SCHMA Myosin V, putative OS=Schistosoma mansoni GN=Smp_176000.1 PE=4 SV=1;tr|C1M0R0|C1M0R0_SCHMA Myosin V, putative OS=Schistosoma mansoni GN=Smp_176000.2 PE=4 SV=1	8	209.56	0.0150556	1.8223	0.960267	1.94567	FALSE	15.2024778968017	15.3638963805814	15.5652157071828	14.1531344546098	14.1922076491751	14.9054476825795
C1M0W4	tr|C1M0W4|C1M0W4_SCHMA DNA replication complex GINS protein PSF2 OS=Schistosoma mansoni GN=Smp_100380 PE=3 SV=2	1	21.735	0.152706	0.816144	2.15482	4.45313	FALSE	18.4778031207303	18.829644117003	18.2948145575818	13.2833653882194	18.0807285977736	17.7737085559686
C1M169	tr|C1M169|C1M169_SCHMA GDP-4-keto-6-deoxy-D-mannose-3, 5-epimerase-4-reductase OS=Schistosoma mansoni GN=GMER PE=2 SV=1	12	35.916	0.712182	0.147409	-0.134497	1.09771	FALSE	20.8401559758368	20.4075036626982	19.8885031965452	20.6790849039175	20.8101718232765	20.0503965181383
C1M264	tr|C1M264|C1M264_SCHMA Uncharacterized protein OS=Schistosoma mansoni GN=Smp_186560 PE=4 SV=1	3	34.118	0.0112649	1.94827	0.761383	1.69512	FALSE	17.8191045833613	17.7171790702941	18.004491307989	17.2834051612495	16.9026299715726	17.0705894629036
C1M280	tr|C1M280|C1M280_SCHMA Innexin OS=Schistosoma mansoni GN=inx PE=3 SV=2	8	62.796	2.07931e-05	4.68208	4.25658	19.1144	TRUE	17.5091841076391	17.7369247603518	18.5068441362016	13.9534898069799	13.3388459562242	13.6908642669623
C1M2E3	tr|C1M2E3|C1M2E3_SCHMA Uncharacterized protein OS=Schistosoma mansoni GN=Smp_116360 PE=4 SV=1	3	33.942	0.0288914	1.53923	-3.59168	12.056	FALSE	13.2980158167032	13.5125371649315	13.7208770455038	14.1667858146227	18.7805038316246	18.3591818924498
C1M2S7	tr|C1M2S7|C1M2S7_SCHMA Helicase, putative OS=Schistosoma mansoni GN=Smp_120360 PE=4 SV=2	14	121.49	0.453287	0.343627	-0.198454	1.14747	FALSE	17.4791429815564	17.6873738995976	17.7776107723472	17.695901519562	17.6149339326703	18.2286543091359
C4PXA6	tr|C4PXA6|C4PXA6_SCHMA Thymidylate kinase OS=Schistosoma mansoni GN=Smp_001360 PE=4 SV=1	20	25.485	0.0490331	1.30951	0.499169	1.4134	FALSE	24.8836742838315	24.7808094085155	24.5066935351526	24.2864200690925	24.2612480561999	24.1260032290284
C4PY08	tr|C4PY08|C4PY08_SCHMA Putative sodium/potassium-dependent atpase beta subunit OS=Schistosoma mansoni GN=Smp_124240 PE=2 SV=1	5	32.92	0.000887564	3.0518	-2.06078	4.17212	TRUE	17.3559538658502	18.0092360954309	18.0155241641772	20.3502025249906	19.7090249179456	19.5038261096981
C4PY91	tr|C4PY91|C4PY91_SCHMA Rab-2,4,14, putative OS=Schistosoma mansoni GN=Smp_004910 PE=4 SV=1	6	24.767	0.0300142	1.52267	-1.38524	2.61215	FALSE	17.1494375360774	17.9740681455095	18.5468521924226	19.5141651663683	19.7467811929224	18.5651287464906
C4PYP8	sp|C4PYP8|DRE2_SCHMA Anamorsin homolog OS=Schistosoma mansoni GN=Smp_207000 PE=3 SV=2	4	29.661	0.138943	0.857163	-0.498917	1.41315	FALSE	19.2913206594954	18.986225608827	18.5417734560053	19.1192557917564	19.7331438371091	19.4636705800737
C4PZQ3	sp|C4PZQ3|LIAS_SCHMA Lipoyl synthase, mitochondrial OS=Schistosoma mansoni GN=Smp_010100 PE=3 SV=1	6	45.769	0.046951	1.32836	0.851375	1.80422	FALSE	17.9169345610458	18.4678287357785	17.753360462796	17.6462849647747	17.2383666577099	16.6993460550798
C4PZS5;C4PZS6	tr|C4PZS5|C4PZS5_SCHMA 60S acidic ribosomal protein P0 OS=Schistosoma mansoni GN=Smp_009690.1 PE=3 SV=1;tr|C4PZS6|C4PZS6_SCHMA 60S acidic ribosomal protein P0 OS=Schistosoma mansoni GN=Smp_009690.2 PE=3 SV=1	15	35.029	0.0195303	1.70929	1.15018	2.21942	FALSE	24.5636716147892	24.8226130399217	24.6911027379521	23.6412242664153	22.8567198997066	24.1288948316669
C4PZT0;C4PZS9	tr|C4PZT0|C4PZT0_SCHMA O-linked n-acetylglucosamine transferase, ogt,putative OS=Schistosoma mansoni GN=Smp_009710.2 PE=4 SV=2;tr|C4PZS9|C4PZS9_SCHMA O-linked n-acetylglucosamine transferase, ogt,putative OS=Schistosoma mansoni GN=Smp_009710.3 PE=4 SV=2	2	78.819	0.598543	0.222905	-0.346425	1.27141	FALSE	13.2980158167032	13.5125371649315	13.7208770455038	12.9301413422795	13.3942550587965	15.2463095552832
C4Q0P6	sp|C4Q0P6|LIS1_SCHMA Lissencephaly-1 homolog OS=Schistosoma mansoni GN=Smp_129340 PE=3 SV=1	9	47.106	0.0075652	2.12118	-1.00392	2.00544	TRUE	18.500798074823	18.7522518372078	19.1981199279349	19.8262741450397	19.6899377451259	19.9467104291696
C4Q195	tr|C4Q195|C4Q195_SCHMA Uncharacterized protein (Fragment) OS=Schistosoma mansoni GN=Smp_130400 PE=4 SV=2	1	21.566	0.672144	0.172538	-0.124548	1.09017	FALSE	18.0989842707004	18.1232810392067	18.3506771651584	18.6341041269843	17.8190969096399	18.4933863446653
C4Q2F2;C4Q2F3	tr|C4Q2F2|C4Q2F2_SCHMA Calcyphosine/tpp, putative OS=Schistosoma mansoni GN=Smp_019640.1 PE=4 SV=1;tr|C4Q2F3|C4Q2F3_SCHMA Calcyphosine/tpp, putative OS=Schistosoma mansoni GN=Smp_019640.2 PE=4 SV=1	9	23.776	0.966673	0.0147206	0.0156932	1.01094	FALSE	22.3055198748122	22.66473854603	21.5879205835574	22.1625056553704	22.5353285611182	21.8132653265838
C4Q2F6	tr|C4Q2F6|C4Q2F6_SCHMA Splicing factor u2af large subunit, putative OS=Schistosoma mansoni GN=Smp_019690 PE=4 SV=1	8	57.958	0.686138	0.163589	0.339288	1.26513	FALSE	19.8767491948862	19.9516927357041	20.6711250385215	19.9215816252402	18.2214279383551	21.3386948582848
C4Q2F8;C4Q2F9	tr|C4Q2F8|C4Q2F8_SCHMA Uncharacterized protein OS=Schistosoma mansoni GN=Smp_019730.1 PE=4 SV=1;tr|C4Q2F9|C4Q2F9_SCHMA Uncharacterized protein OS=Schistosoma mansoni GN=Smp_019730.2 PE=4 SV=1	3	13.076	0.344795	0.462439	0.366119	1.28888	FALSE	20.2663004853639	19.6295245831653	19.4929846706017	19.6683867367357	19.7651859889096	18.8568809720286
C4Q2I0	tr|C4Q2I0|C4Q2I0_SCHMA DNAj homolog subfamily B member, putative (Fragment) OS=Schistosoma mansoni GN=Smp_132870 PE=4 SV=2	3	32.784	0.91247	0.0397815	0.0390501	1.02744	FALSE	17.0838426708015	17.940179978649	17.9718038501996	17.6695807578983	17.9454687681631	17.2636266211303
C4Q2I8	tr|C4Q2I8|C4Q2I8_SCHMA Aminoacylase (M20 family) OS=Schistosoma mansoni GN=Smp_019630 PE=4 SV=2	19	48.957	0.00245968	2.60912	-1.4176	2.6714	TRUE	21.6493407651205	21.8468493359438	21.4694719793204	23.001202192306	23.5137509767454	22.7034957605293
C4Q309;C4Q308	tr|C4Q309|C4Q309_SCHMA Uncharacterized protein OS=Schistosoma mansoni GN=Smp_021730.1 PE=4 SV=1;tr|C4Q308|C4Q308_SCHMA Uncharacterized protein OS=Schistosoma mansoni GN=Smp_021730.3 PE=4 SV=1	1	25.227	0.368973	0.433005	-0.717892	1.64478	FALSE	13.2980158167032	15.7894667662865	15.7604887359071	15.2682852729644	16.10504955076	15.628312885552
C4Q310	tr|C4Q310|C4Q310_SCHMA Uncharacterized protein OS=Schistosoma mansoni GN=Smp_021730.2 PE=4 SV=1	9	25.128	0.19748	0.704477	0.350001	1.27456	FALSE	23.4930470948687	23.2910719000363	23.2069168993129	23.3244665479106	22.9103421885911	22.7062231088145
C4Q351	tr|C4Q351|C4Q351_SCHMA Camp-dependent protein kinase type I-beta regulatory subunit, putative (Fragment) OS=Schistosoma mansoni GN=Smp_022100 PE=4 SV=1	1	9.3097	0.00193494	2.71333	-1.37579	2.5951	TRUE	18.5772345307095	18.4975596371729	18.1596671795838	19.8572622646595	20.0719034227991	19.4326643391692
C4Q352	tr|C4Q352|C4Q352_SCHMA Pak inhibitor skb15, putative OS=Schistosoma mansoni GN=Smp_022110 PE=4 SV=1	4	43.685	0.00892323	2.04948	3.16146	8.94735	TRUE	18.5785893697552	18.1374839139981	18.3183727445585	13.2833653882194	16.0595444176867	16.2071528561515
C4Q3U8	tr|C4Q3U8|C4Q3U8_SCHMA Tetraspanin OS=Schistosoma mansoni GN=Smp_024820.2 PE=3 SV=1	4	25.177	0.0697235	1.15662	-2.17075	4.50258	FALSE	17.5277549427056	15.7016293641209	19.3634696859788	20.6298816781855	19.1848342681033	19.2903976006536
C4Q4J8	tr|C4Q4J8|C4Q4J8_SCHMA Phosphatidylinositol transfer protein (Fragment) OS=Schistosoma mansoni GN=Smp_136800 PE=4 SV=2	2	35.473	0.0253667	1.59574	-2.73713	6.66743	FALSE	13.2980158167032	13.5125371649315	16.3857222711476	17.1247861387977	16.4226572795194	17.8602256591403
C4Q4Q6	tr|C4Q4Q6|C4Q4Q6_SCHMA 40S ribosomal protein S3, putative OS=Schistosoma mansoni GN=Smp_027610 PE=3 SV=1	19	25.457	0.286944	0.542202	0.687394	1.61037	FALSE	23.7380538054676	23.9821621108847	24.126351929296	23.2984273518671	22.0948685014295	24.3910909123933
C4Q4S4	tr|C4Q4S4|C4Q4S4_SCHMA Synembryn, putative OS=Schistosoma mansoni GN=Smp_027910 PE=4 SV=1	19	60.068	0.843909	0.0737046	-0.167534	1.12314	FALSE	18.6834867399372	18.3309427474455	18.7747956771333	18.5466054989991	17.2460883328818	20.4991322644348
C4Q4S5	tr|C4Q4S5|C4Q4S5_SCHMA Tubulin alpha chain OS=Schistosoma mansoni GN=Smp_027920 PE=3 SV=1	17	50.174	3.10704e-05	4.50765	3.28748	9.76408	TRUE	23.3567589200378	23.2912074088929	22.8790031681331	19.9441151021098	20.2398659637758	19.4805380855097
C4Q4W0	tr|C4Q4W0|C4Q4W0_SCHMA Uncharacterized protein OS=Schistosoma mansoni GN=Smp_027880 PE=4 SV=1	3	14.586	0.147478	0.831273	0.414707	1.33303	FALSE	21.5461829847192	21.6019976772305	21.1717204643101	21.224080997321	21.1553194309867	20.6963804305687
C4Q4W5	tr|C4Q4W5|C4Q4W5_SCHMA Nucleoporin 145 (S59 family) OS=Schistosoma mansoni GN=Smp_027890 PE=4 SV=1	16	135.68	0.00272036	2.56537	1.61099	3.05462	TRUE	19.702969588551	19.5778153044672	19.2644227302648	17.4170113440548	17.8477358447461	18.4474822845571
C4Q4W6	tr|C4Q4W6|C4Q4W6_SCHMA Nuclear pore complex protein nup98, putative OS=Schistosoma mansoni GN=Smp_027900 PE=4 SV=2	5	89.656	0.449266	0.347496	-0.344814	1.26999	FALSE	14.7430327585809	16.2492421585297	15.8935669817638	15.7655188402064	16.0604862461903	16.0942784077591
C4Q500	tr|C4Q500|C4Q500_SCHMA Caspase-3 OS=Schistosoma mansoni PE=2 SV=1	7	33.108	0.690269	0.160981	-0.0993955	1.07132	FALSE	21.2127565875956	21.5719735606032	20.9098951637613	21.4025539442989	21.3182436948428	21.2720140676669
C4Q592;G4LW88	tr|C4Q592|C4Q592_SCHMA Methyl-CpG binding domain protein OS=Schistosoma mansoni GN=MBD PE=2 SV=1;tr|G4LW88|G4LW88_SCHMA Methyl-cpg binding protein, mbd, putative OS=Schistosoma mansoni GN=Smp_138180.2 PE=4 SV=1	6	35.643	0.719227	0.143134	0.0983807	1.07057	FALSE	19.1828840922216	18.7194043321738	18.4348065620423	18.7867837480107	18.5108143726934	18.7443548457615
C4Q5I7	tr|C4Q5I7|C4Q5I7_SCHMA Calreticulin autoantigen homolog,putative OS=Schistosoma mansoni GN=Smp_030370 PE=3 SV=2	2	45.377	0.556537	0.254506	-0.571266	1.48583	FALSE	18.7037816613402	18.5679704402917	18.992355257971	20.3032638010349	20.4918203913547	17.1828217619529
C4Q5J0	tr|C4Q5J0|C4Q5J0_SCHMA Camp-dependent protein kinase type I-beta regulatory subunit, putative OS=Schistosoma mansoni GN=Smp_030400 PE=4 SV=2	9	44.456	0.000503507	3.29799	-2.46419	5.51818	TRUE	18.3920253715101	17.3248132341178	17.3163540478099	20.0736380284327	20.3246961620955	20.0274397194047
C4Q5J8;C4Q5J9;Q5QEI6	tr|C4Q5J8|C4Q5J8_SCHMA Glycerol-3-phosphate dehydrogenase [NAD(+)] OS=Schistosoma mansoni GN=Smp_030500.1 PE=3 SV=1;tr|C4Q5J9|C4Q5J9_SCHMA Glycerol-3-phosphate dehydrogenase [NAD(+)] OS=Schistosoma mansoni GN=Smp_030500.2 PE=3 SV=1;tr|Q5QEI6|Q5QEI6_SCHMA G	20	38.861	0.237756	0.623868	-0.466072	1.38134	FALSE	21.8776278961164	22.0228460628611	21.8470468080666	22.4103631252482	21.7323366004479	23.0030380822246
C4Q5L0;C4Q5L1	tr|C4Q5L0|C4Q5L0_SCHMA DNAj homolog subfamily C member, putative OS=Schistosoma mansoni GN=Smp_138680.2 PE=4 SV=2;tr|C4Q5L1|C4Q5L1_SCHMA DNAj homolog subfamily C member, putative OS=Schistosoma mansoni GN=Smp_138680.1 PE=4 SV=1	4	45.789	0.0355939	1.44862	-0.64899	1.56807	FALSE	16.2946220225857	16.4784624395213	15.9158107312568	16.9792883424786	16.6681359792768	16.9884418140689
C4Q5M7	tr|C4Q5M7|C4Q5M7_SCHMA Syntaxin, putative OS=Schistosoma mansoni GN=Smp_138840 PE=4 SV=2	5	37.221	0.796782	0.0986602	0.215046	1.16074	FALSE	17.8962715254094	19.1185969602838	16.277198482868	18.3614705549594	16.8314037551229	17.4540559367608
C4Q5Q2	tr|C4Q5Q2|C4Q5Q2_SCHMA Uncharacterized protein OS=Schistosoma mansoni GN=Smp_139120 PE=4 SV=2	4	22.392	0.488557	0.311085	-0.48567	1.40024	FALSE	17.3761114890582	18.789626385648	18.5766268660566	18.5845140899904	17.7394145718193	19.875446828931
C4Q5U3	tr|C4Q5U3|C4Q5U3_SCHMA Ankyrin 2,3/unc44, putative (Fragment) OS=Schistosoma mansoni GN=Smp_139110 PE=4 SV=2	28	105.7	0.258888	0.586889	-0.388834	1.30933	FALSE	20.0291821777283	20.4057024201297	20.7019488538768	20.7707745656579	20.3484289515961	21.1841321379609
C4Q5U5	tr|C4Q5U5|C4Q5U5_SCHMA Basigin related OS=Schistosoma mansoni GN=Smp_031880 PE=2 SV=1	7	32.499	0.000593387	3.22666	-1.63696	3.1101	TRUE	19.2534545024285	19.7920338809206	19.7282527564559	21.4057208045524	21.2539962926107	21.0249122624443
C4Q5Y4;C4Q5Y6;C4Q5Y7;C4Q5Y5;C4Q5Y3;C4Q5Y8	tr|C4Q5Y4|C4Q5Y4_SCHMA Uncharacterized protein OS=Schistosoma mansoni GN=Smp_031920.7 PE=4 SV=1;tr|C4Q5Y6|C4Q5Y6_SCHMA Uncharacterized protein OS=Schistosoma mansoni GN=Smp_031920.3 PE=4 SV=1;tr|C4Q5Y7|C4Q5Y7_SCHMA Uncharacterized protein OS=Schistosoma ma	6	30.98	0.362401	0.440811	1.14841	2.21669	FALSE	18.3784469650096	19.1536247495168	18.7137768314073	18.0258166191459	15.0584046403237	19.7163978693714
C4Q5Z2;C4Q5Z1	tr|C4Q5Z2|C4Q5Z2_SCHMA Uncharacterized protein OS=Schistosoma mansoni GN=Smp_031950.1 PE=4 SV=1;tr|C4Q5Z1|C4Q5Z1_SCHMA Uncharacterized protein OS=Schistosoma mansoni GN=Smp_031950.2 PE=4 SV=1	2	17.299	0.140686	0.851749	-0.557086	1.47129	FALSE	16.3281439677535	16.9499908939091	15.8547772742456	17.1353424010485	16.8437973502682	16.825030629548
C4Q728;C4Q726;C4Q727	tr|C4Q728|C4Q728_SCHMA Uncharacterized protein OS=Schistosoma mansoni GN=Smp_141820.2 PE=4 SV=1;tr|C4Q726|C4Q726_SCHMA Uncharacterized protein OS=Schistosoma mansoni GN=Smp_141820.1 PE=4 SV=1;tr|C4Q727|C4Q727_SCHMA Uncharacterized protein OS=Schistosoma ma	4	27.006	0.196237	0.707219	0.848228	1.80029	FALSE	19.0368414973974	17.9453693361687	18.2091625631171	18.2938876747438	16.4085002580985	17.9443000404946
C4Q7T4	tr|C4Q7T4|C4Q7T4_SCHMA Nuclear protein localization, putative OS=Schistosoma mansoni GN=Smp_039180.1 PE=4 SV=1	18	77.432	0.65254	0.185393	-0.0917127	1.06563	FALSE	20.0946383896496	19.9764431303993	20.188403126976	20.0370014299598	20.32776948103	20.1698518053505
C4Q820;G4VKI3	tr|C4Q820|C4Q820_SCHMA Putative cytochrome C oxidase polypeptide vib OS=Schistosoma mansoni GN=Smp_144000 PE=4 SV=1;tr|G4VKI3|G4VKI3_SCHMA Putative cytochrome C oxidase polypeptide vib OS=Schistosoma mansoni GN=Smp_144010.2 PE=4 SV=1	5	11.456	0.205312	0.687587	0.295552	1.22735	FALSE	21.2206214411419	21.2449726695434	21.2517294385301	21.1324434354745	21.0205619539232	20.6776619875021
C4Q9B4	tr|C4Q9B4|C4Q9B4_SCHMA Dynamin, putative OS=Schistosoma mansoni GN=Smp_044920 PE=3 SV=2	15	92.81	0.00406877	2.39054	-1.48956	2.80803	TRUE	17.4037731424257	18.0036898010287	18.0042823277553	18.7769402918072	19.6174476799169	19.4860279521441
C4Q9B5	tr|C4Q9B5|C4Q9B5_SCHMA Syntaxin binding protein-1,2,3, putative (Fragment) OS=Schistosoma mansoni GN=Smp_146400 PE=3 SV=2	4	72.642	0.390962	0.407866	0.680298	1.60247	FALSE	16.4541745631526	18.1185480876728	18.1115209406357	16.1420932370154	16.3165555859379	18.1847004215897
C4Q9B6	tr|C4Q9B6|C4Q9B6_SCHMA Uncharacterized protein OS=Schistosoma mansoni GN=Smp_146410 PE=4 SV=2	2	33.51	0.257901	0.588547	-0.3115	1.241	FALSE	26.2958353181803	25.9997440891262	26.0978922953403	26.1129491790803	26.7897262510472	26.4252954765083
C4QB35	tr|C4QB35|C4QB35_SCHMA Heterogeneous nuclear ribonucleoprotein l (Hnrnp l), putative OS=Schistosoma mansoni GN=Smp_051530 PE=4 SV=1	16	61.346	0.0429517	1.36702	0.6495	1.56862	FALSE	21.1764802301721	21.1116772526434	21.4568005611528	20.2378048694082	20.8915031426014	20.6671503947572
C4QB42	tr|C4QB42|C4QB42_SCHMA Heterogeneous nuclear ribonucleoprotein l (Hnrnp l), putative OS=Schistosoma mansoni GN=Smp_149700 PE=4 SV=2	6	59.166	0.117133	0.931319	-0.3825	1.3036	FALSE	18.5910874980217	18.8237507344922	18.9379574539973	19.3492833181797	19.1127037972665	19.03830773679
C4QBN1;Q9GSS8;G4LXZ8	tr|C4QBN1|C4QBN1_SCHMA Histone H4 OS=Schistosoma mansoni GN=Smp_053300 PE=3 SV=1;tr|Q9GSS8|Q9GSS8_SCHMA Histone H4 (Fragment) OS=Schistosoma mansoni PE=3 SV=1;tr|G4LXZ8|G4LXZ8_SCHMA Histone H4 (Fragment) OS=Schistosoma mansoni GN=Smp_149600 PE=3 SV=1	12	11.367	0.047937	1.31933	-1.08394	2.11982	FALSE	27.4128785966213	26.9272647140055	27.1540647699887	28.0372905207017	27.5858527660311	29.1228842497511
C4QBX7	tr|C4QBX7|C4QBX7_SCHMA Uncharacterized protein OS=Schistosoma mansoni GN=Smp_151230 PE=4 SV=1	2	8.6766	0.0525701	1.27926	0.83808	1.78767	FALSE	20.6266610308043	21.6230795578195	21.0574381484874	20.4600627149776	20.4921248109178	19.8407510876697
C4QC82	tr|C4QC82|C4QC82_SCHMA Uncharacterized protein OS=Schistosoma mansoni GN=Smp_151780 PE=4 SV=1	2	23.902	0.757613	0.120552	0.205553	1.15313	FALSE	18.3591107490374	16.7721479425984	16.7292014333347	16.0784087293342	17.5911070695991	17.5742845820029
C4QCA0;C4QCA1	tr|C4QCA0|C4QCA0_SCHMA Chmp1 (Chromatin modifying protein) (Charged multivesicular body protein), putative OS=Schistosoma mansoni GN=Smp_055880.1 PE=4 SV=2;tr|C4QCA1|C4QCA1_SCHMA Chmp1 (Chromatin modifying protein) (Charged multivesicular body protein), pu	7	25.953	0.0222247	1.65316	0.62812	1.54555	FALSE	21.2444545041775	21.1541374279717	20.9033726019269	20.600213184478	20.4801022826686	20.3372880370706
C4QCA2	tr|C4QCA2|C4QCA2_SCHMA Ribonucleoside-diphosphate reductase small chain, putative OS=Schistosoma mansoni GN=Smp_055890 PE=4 SV=1	16	42.269	0.0698216	1.15601	-0.745188	1.67619	FALSE	21.4496025543248	21.8879644832967	22.3990227245017	22.7631342939511	22.9563356890168	22.2526825212261
C4QCD2	sp|C4QCD2|PURA_SCHMA Adenylosuccinate synthetase OS=Schistosoma mansoni GN=Smp_055990 PE=3 SV=2	7	46.668	0.134909	0.869959	0.69264	1.61624	FALSE	17.2687720851203	18.7112930190116	18.0669246991709	17.1877756720451	17.541690386299	17.2396031592076
C4QCX0	tr|C4QCX0|C4QCX0_SCHMA Uncharacterized protein OS=Schistosoma mansoni GN=Smp_057720.1 PE=4 SV=2	2	8.3379	0.0661435	1.17951	1.55298	2.93423	FALSE	21.8217913721363	21.8852739915974	21.6240716169882	20.7876029624141	21.2290092328144	18.6555757290998
C4QDB5	tr|C4QDB5|C4QDB5_SCHMA Uncharacterized protein OS=Schistosoma mansoni GN=Smp_059240 PE=4 SV=1	2	25.109	0.220649	0.656299	-1.79892	3.4796	FALSE	13.2980158167032	13.5125371649315	17.541197376519	16.255321803844	15.518940182923	17.9742585926866
C4QDC5	tr|C4QDC5|C4QDC5_SCHMA Sugar nucleotide epimerase related OS=Schistosoma mansoni GN=Smp_154040 PE=4 SV=2	5	32.511	0.0126596	1.89758	-0.791546	1.73093	FALSE	19.4643920008476	19.46077162748	19.1535554503237	20.2569452417958	20.3079630959017	19.888447829701
C4QDC9	tr|C4QDC9|C4QDC9_SCHMA Derlin OS=Schistosoma mansoni GN=Smp_059350.2 PE=3 SV=1	1	29.056	0.0894053	1.04864	-2.47655	5.56565	FALSE	16.9604505571395	13.5125371649315	18.0805348175207	18.6064081562543	17.922763747417	19.4540012799048
C4QDD1	tr|C4QDD1|C4QDD1_SCHMA Pre-mRNA processing factor, putative OS=Schistosoma mansoni GN=Smp_059360 PE=4 SV=1	6	45.71	0.153658	0.813445	-0.637966	1.55613	FALSE	18.6781979600907	18.0653328914174	17.5856409662758	18.6775325806385	19.2526194180507	18.3129186942345
C4QDY7;C4QDY6	tr|C4QDY7|C4QDY7_SCHMA Nonsense-mediated mRNA decay protein 1 (Rent1),putative OS=Schistosoma mansoni GN=Smp_061590.2 PE=4 SV=1;tr|C4QDY6|C4QDY6_SCHMA Nonsense-mediated mRNA decay protein 1 (Rent1),putative OS=Schistosoma mansoni GN=Smp_061590.1 PE=4 SV=1	31	142.25	0.471249	0.32675	-0.230314	1.17309	FALSE	18.581711073972	19.2287410675667	19.5480474065159	19.2431898202687	19.4835562748115	19.3226949298299
C4QE42	tr|C4QE42|C4QE42_SCHMA Uncharacterized protein OS=Schistosoma mansoni GN=Smp_155590 PE=4 SV=1	2	33.504	0.00184848	2.73318	-3.51137	11.4033	TRUE	15.833877112433	13.5125371649315	13.7208770455038	17.8815164998407	17.6634583257135	18.0564391342761
C4QEK9	tr|C4QEK9|C4QEK9_SCHMA Filamin-related OS=Schistosoma mansoni GN=Smp_156590 PE=4 SV=2	57	179.18	0.0810875	1.09105	-0.594221	1.50966	FALSE	20.8939921380799	21.2780034275927	21.5412093805216	21.7904957461321	22.179148316875	21.526224385359
C4QFX9;C4QFY0	tr|C4QFX9|C4QFX9_SCHMA Heat shock protein 70 (Hsp70)-4, putative OS=Schistosoma mansoni GN=Smp_069130.2 PE=3 SV=1;tr|C4QFY0|C4QFY0_SCHMA Heat shock protein 70 (Hsp70)-4, putative OS=Schistosoma mansoni GN=Smp_069130.1 PE=3 SV=1	47	94.463	0.0101369	1.99409	-0.803845	1.74575	FALSE	24.2729584785685	24.4492952647989	24.7147776457013	25.1759258056443	25.4411109541059	25.2315298586719
C4QH88;Q9XY89	tr|C4QH88|C4QH88_SCHMA Annexin OS=Schistosoma mansoni GN=Smp_074150.1 PE=1 SV=1;tr|Q9XY89|Q9XY89_SCHMA Annexin OS=Schistosoma mansoni PE=2 SV=1	20	41.415	0.00636734	2.19604	-1.06981	2.09915	TRUE	21.2944634759576	21.9024425489555	21.3006977227229	22.6838230297066	22.3590939156085	22.6641118677476
C4QHD7;C4QNM9	tr|C4QHD7|C4QHD7_SCHMA Histone H3 OS=Schistosoma mansoni GN=Smp_074610 PE=3 SV=1;tr|C4QNM9|C4QNM9_SCHMA Histone H3, putative OS=Schistosoma mansoni GN=Smp_177140 PE=3 SV=1	4	15.344	0.0573005	1.24184	-1.08335	2.11895	FALSE	25.4475364211691	25.2455741800871	25.6444415331708	26.4862145632624	25.6930714309625	27.4083165985335
C4QIC0	tr|C4QIC0|C4QIC0_SCHMA Tubulin beta chain OS=Schistosoma mansoni GN=Smp_078040 PE=3 SV=1	1	49.82	0.00345549	2.46149	-3.94697	15.4226	TRUE	15.4761265429229	16.7645472515721	13.7208770455038	19.5468820097888	18.4563974057426	19.799189097028
C4QIH2	tr|C4QIH2|C4QIH2_SCHMA Lupus la ribonucleoprotein, putative OS=Schistosoma mansoni GN=Smp_164650 PE=4 SV=2	24	42.49	0.000792083	3.10123	1.4315	2.69727	TRUE	24.9446164069816	24.7915300961167	24.620923020079	23.4233165969796	23.5581640264514	23.0810897478264
C4QIH8	tr|C4QIH8|C4QIH8_SCHMA DNA primase large subunit, putative OS=Schistosoma mansoni GN=Smp_079050.1 PE=4 SV=1	9	58.881	0.863585	0.0636948	-0.0774297	1.05514	FALSE	17.3347706936773	18.7937029669732	18.6245928832579	18.4944309740561	18.1121757630607	18.3787487773935
C4QII3	tr|C4QII3|C4QII3_SCHMA Uncharacterized protein OS=Schistosoma mansoni GN=Smp_164780 PE=4 SV=2	4	32.578	0.00670939	2.17332	2.23529	4.70858	TRUE	19.7406746114218	18.8153628616034	19.3556276008792	18.1273400078234	16.830119990097	16.24832801667
C4QII4	tr|C4QII4|C4QII4_SCHMA Mitochondrial ribosomal protein S9, putative OS=Schistosoma mansoni GN=Smp_164790 PE=4 SV=2	2	12.891	0.000629036	3.20132	1.49892	2.82632	TRUE	19.3282492936332	18.8745556237939	18.8797960442551	17.568723981481	17.6438640777864	17.3732389429006
C4QII5	tr|C4QII5|C4QII5_SCHMA 26S proteasome regulatory subunit S3, putative OS=Schistosoma mansoni GN=Smp_164800 PE=4 SV=1	5	29.841	0.0615703	1.21063	-1.05169	2.07296	FALSE	16.9354198839502	17.6468768824245	18.0921835828678	18.2396705084424	18.228120097525	19.3617624951665
C4QJ35	tr|C4QJ35|C4QJ35_SCHMA ATP-dependent transporter, putative OS=Schistosoma mansoni GN=Smp_166040 PE=4 SV=2	12	112.26	0.890057	0.0505821	0.123449	1.08934	FALSE	17.8155733246141	17.1959511324491	17.8328674652801	17.3213342194172	15.879433671827	19.2732768951106
C4QJA1	tr|C4QJA1|C4QJA1_SCHMA ATP synthase delta chain, mitochondrial,putative OS=Schistosoma mansoni GN=Smp_082120 PE=3 SV=1	6	17.354	0.846904	0.0721659	-0.0505392	1.03565	FALSE	21.7458440055485	21.6919054688992	21.413259311719	21.4030122337058	21.5597623660085	22.0398516980659
C4QJA5	tr|C4QJA5|C4QJA5_SCHMA Guanosine-diphosphatase, putative OS=Schistosoma mansoni GN=Smp_166520 PE=3 SV=1	2	53.28	0.000177093	3.7518	-2.9065	7.49797	TRUE	13.2980158167032	13.5125371649315	13.7208770455038	16.005309892705	17.0744536488208	16.1711656974832
C4QJA9	tr|C4QJA9|C4QJA9_SCHMA Translation initiation factor 2b, delta subunit,putative OS=Schistosoma mansoni GN=Smp_166550 PE=3 SV=1	4	45.929	0.489856	0.309932	-0.51335	1.42736	FALSE	16.3428398091367	16.5303612268638	16.1886974244048	17.2458151655794	15.3240898315869	18.0320420892723
C4QJB2;Q8MTY0	tr|C4QJB2|C4QJB2_SCHMA NADPH:adrenodoxin oxidoreductase, mitochondrial OS=Schistosoma mansoni GN=Smp_166580 PE=3 SV=1;tr|Q8MTY0|Q8MTY0_SCHMA NADPH:adrenodoxin oxidoreductase, mitochondrial OS=Schistosoma mansoni PE=2 SV=1	7	60.272	0.00728522	2.13756	-3.25319	9.53474	TRUE	13.2980158167032	13.5125371649315	15.5261962170026	17.4253370442256	16.2633695330799	18.4076244501812
C4QK30	tr|C4QK30|C4QK30_SCHMA Protein bat5 (S09 family) (Fragment) OS=Schistosoma mansoni GN=Smp_084790 PE=4 SV=2	2	30.454	0.0126141	1.89915	-3.07366	8.41904	FALSE	13.2980158167032	13.5125371649315	16.1864396084138	17.6394037653913	17.9627347619285	16.6158202565925
C4QKE4	tr|C4QKE4|C4QKE4_SCHMA Uncharacterized protein OS=Schistosoma mansoni GN=Smp_168820 PE=4 SV=2	3	65.706	0.249473	0.602976	-0.930124	1.90544	FALSE	15.0810216921463	15.6338190044537	17.2021949108402	16.8606251138164	15.95199873817	17.89478385738
C4QKF1;C4QKF0	tr|C4QKF1|C4QKF1_SCHMA Metastasis-associated protein 1 (Mta1),putative OS=Schistosoma mansoni GN=Smp_168850.2 PE=4 SV=1;tr|C4QKF0|C4QKF0_SCHMA Metastasis-associated protein 1 (Mta1),putative OS=Schistosoma mansoni GN=Smp_168850.1 PE=4 SV=1	7	68.339	0.0662272	1.17896	0.634153	1.55203	FALSE	16.3867164273463	15.6515186709262	16.1898495116444	15.6363302678627	15.1490396032407	15.5402553539969
C4QKF2	tr|C4QKF2|C4QKF2_SCHMA Putative RNA-binding protein OS=Schistosoma mansoni GN=Smp_168860 PE=4 SV=1	1	24.579	0.0599805	1.22199	1.55964	2.94779	FALSE	16.7162964830987	16.2027349919158	16.3349533232836	15.646563659661	13.3388459562242	15.5896701137441
C4QKQ4	tr|C4QKQ4|C4QKQ4_SCHMA 50S ribosomal protein L3, putative OS=Schistosoma mansoni GN=Smp_087440 PE=4 SV=1	3	44.965	0.846148	0.0725538	0.275675	1.21056	FALSE	15.198470558426	13.0652963798682	16.3824027014994	13.2833653882194	13.3388459562242	17.1969340896722
C4QKQ5;C4QKQ6	tr|C4QKQ5|C4QKQ5_SCHMA Uncharacterized protein OS=Schistosoma mansoni GN=Smp_169720.1 PE=4 SV=2;tr|C4QKQ6|C4QKQ6_SCHMA Uncharacterized protein OS=Schistosoma mansoni GN=Smp_169720.2 PE=4 SV=2	2	47.448	0.00352286	2.4531	-1.99705	3.99182	TRUE	13.2980158167032	13.5125371649315	13.7208770455038	14.6187399065018	15.9809770003967	15.9228499619952
C4QKQ7	tr|C4QKQ7|C4QKQ7_SCHMA Fascin, putative OS=Schistosoma mansoni GN=Smp_169730 PE=4 SV=1	9	68.956	0.067969	1.16769	-0.642352	1.56087	FALSE	18.4635461265054	18.4757483990748	18.4030839179898	18.704230688309	19.6192697343115	18.9459333243618
C4QKQ9	tr|C4QKQ9|C4QKQ9_SCHMA Polynucleotide kinase-3-phosphatase, putative OS=Schistosoma mansoni GN=Smp_169740 PE=4 SV=2	12	76.495	0.0213975	1.66964	0.740444	1.67069	FALSE	19.6287250445794	19.2011066339271	19.2055617619386	18.8568608718237	18.4077431365693	18.5494573559929
C4QKR0;B0EVY6	tr|C4QKR0|C4QKR0_SCHMA Dicer-1, putative OS=Schistosoma mansoni GN=Smp_169750 PE=4 SV=2;tr|B0EVY6|B0EVY6_SCHMA Dicer OS=Schistosoma mansoni PE=2 SV=1	9	263.98	0.0255928	1.59188	-2.88793	7.40209	FALSE	9.05623402476746	11.583299224649	12.3341687114275	13.2833653882194	13.3388459562242	15.0152858609467
C4QKR3	tr|C4QKR3|C4QKR3_SCHMA Uncharacterized protein OS=Schistosoma mansoni GN=Smp_169770 PE=4 SV=2	4	64.608	0.012343	1.90858	-3.3881	10.4693	FALSE	13.2980158167032	13.5125371649315	16.7191178215417	17.6418909925702	17.9082982426863	18.1437770293691
C4QKY6	tr|C4QKY6|C4QKY6_SCHMA Spectrin beta chain, brain 4 (Spectrin, non-erythroid beta chain 4) (Beta-V spectrin) (BSPECV),putative OS=Schistosoma mansoni GN=Smp_170310 PE=4 SV=2	23	47.589	0.00136269	2.8656	-1.19673	2.29219	TRUE	21.9155435149206	22.1335775314021	22.0887793057934	23.1266279699523	23.4856165541191	23.1158367335831
C4QL66	tr|C4QL66|C4QL66_SCHMA Ubiquitin (Ribosomal protein L40), putative OS=Schistosoma mansoni GN=Smp_089430 PE=4 SV=1	1	14.615	0.000212635	3.67236	1.72514	3.30613	TRUE	21.4505989398694	21.3754991976612	21.2366125078975	19.4729832873834	19.8835268483909	19.5307662669094
C4QLP6	tr|C4QLP6|C4QLP6_SCHMA Ubiquitin-fold modifier 1 OS=Schistosoma mansoni GN=Smp_091230 PE=3 SV=1	1	9.1094	0.0765423	1.1161	2.75853	6.76706	FALSE	19.4550032513571	19.5269848137893	19.4455953793485	17.9094398009304	18.5516944875611	13.6908642669623
C4QLY5	tr|C4QLY5|C4QLY5_SCHMA NADH-ubiquinone oxidoreductase mitochondrial, putative OS=Schistosoma mansoni GN=Smp_092570 PE=3 SV=1	12	31.704	0.845349	0.0729642	0.0444984	1.03132	FALSE	21.3238904372766	21.6816872805275	21.7548725807544	21.6227838953745	21.6387861739333	21.3653850378243
C4QLY6	tr|C4QLY6|C4QLY6_SCHMA GTP-binding protein alpha subunit, gna,putative OS=Schistosoma mansoni GN=Smp_092580 PE=4 SV=2	1	14.372	0.454526	0.342442	-0.931072	1.90669	FALSE	21.312191581078	20.2565669120122	20.4422823504464	21.2096578366438	24.0950021214204	19.4995957171033
C4QM45	tr|C4QM45|C4QM45_SCHMA E2F/DP family, putative OS=Schistosoma mansoni GN=Smp_093310 PE=3 SV=1	4	32.642	0.559512	0.252191	-0.262695	1.19972	FALSE	19.4077363105557	19.2474554284222	17.9968088357276	19.1355814207011	19.3836618644585	18.9208423433989
C4QM46	tr|C4QM46|C4QM46_SCHMA Ribosome biogenesis protein Nop10, putative OS=Schistosoma mansoni GN=Smp_093320 PE=4 SV=1	1	7.6236	0.0304822	1.51595	0.736703	1.66636	FALSE	23.5465657971043	23.2610845618114	23.3852963746252	22.8141496247504	22.9337090023214	22.2349783374476
C4QMA7	tr|C4QMA7|C4QMA7_SCHMA Serine/threonine kinase OS=Schistosoma mansoni GN=Smp_094250 PE=3 SV=1	6	55.269	0.105983	0.974762	-1.43302	2.70012	FALSE	15.3435265498444	17.0687770463596	18.2745091156561	18.6636772423676	17.9554528567358	18.3667502224379
C4QMB0	tr|C4QMB0|C4QMB0_SCHMA Serine/threonine-protein phosphatase 2A 55 kDa regulatory subunit B (Fragment) OS=Schistosoma mansoni GN=Smp_173810 PE=3 SV=1	6	56.373	0.00164116	2.78485	-2.07697	4.21921	TRUE	15.9277368889287	17.1144858786148	16.2739660171132	18.1496867706276	18.6361349106843	18.7612834912013
C4QMB3;A9NI53	tr|C4QMB3|C4QMB3_SCHMA 26S protease regulatory subunit, putative OS=Schistosoma mansoni GN=Smp_173840 PE=3 SV=1;tr|A9NI53|A9NI53_SCHMA 26S proteasome subunit ATPase 4 (Fragment) OS=Schistosoma mansoni GN=RPT4 PE=2 SV=1	21	49.181	0.0238397	1.6227	0.592885	1.50826	FALSE	22.5221126111421	22.7911181260989	22.7372191410145	22.0524691642316	22.2267853662919	21.9925399139123
C4QMH7	tr|C4QMH7|C4QMH7_SCHMA Uncharacterized protein OS=Schistosoma mansoni GN=Smp_095250 PE=4 SV=1	5	20.287	0.112796	0.947706	0.4086	1.3274	FALSE	21.4220013290619	21.3682211270956	21.3304537487083	21.0789059663854	21.1646436545002	20.6513273777631
C4QMI1	tr|C4QMI1|C4QMI1_SCHMA Serine-threonine kinase receptor-associated protein (Strap), putative OS=Schistosoma mansoni GN=Smp_174390 PE=4 SV=2	16	40.101	0.00586547	2.2317	1.13059	2.18949	TRUE	22.4558541478966	22.3507221076971	21.9386593556653	21.0169316714489	21.4759527033182	20.8605761956945
C4QMW6	tr|C4QMW6|C4QMW6_SCHMA Uncharacterized protein OS=Schistosoma mansoni GN=Smp_096790 PE=4 SV=2	1	20.919	0.168479	0.773455	2.66601	6.34673	FALSE	19.8024542932716	20.5969199177334	19.6198264903224	19.2333793157922	13.3388459562242	19.4489365452082
C4QMW7	tr|C4QMW7|C4QMW7_SCHMA 26S proteasome regulatory subunit rpn2,putative OS=Schistosoma mansoni GN=Smp_175250 PE=4 SV=2	30	107.81	0.446106	0.350562	0.41966	1.33761	FALSE	21.366143319967	21.6365810137131	21.6945742796564	21.1059934017451	20.1762463974969	22.1560798036453
C4QMW9	tr|C4QMW9|C4QMW9_SCHMA Uncharacterized protein OS=Schistosoma mansoni GN=Smp_096810.1 PE=4 SV=2	6	55.493	0.107048	0.970421	0.506465	1.42057	FALSE	19.9920439271519	19.5593907438366	19.4443891876243	18.8275948148453	19.2222845075866	19.4265494488087
C4QNP4	tr|C4QNP4|C4QNP4_SCHMA Cytidylate kinase (Fragment) OS=Schistosoma mansoni GN=Smp_177230 PE=4 SV=2	1	8.3635	0.348767	0.457464	-1.69911	3.247	FALSE	13.2980158167032	19.3325869406246	19.2013139869772	18.8551871985516	19.101361463358	18.9726952328139
C4QNZ5	tr|C4QNZ5|C4QNZ5_SCHMA Phenylalanyl-tRNA synthetase alpha chain,putative OS=Schistosoma mansoni GN=Smp_101230 PE=4 SV=2	6	31.852	0.0131505	1.88106	0.902918	1.86984	FALSE	21.0135285669387	20.9218267973913	20.930846289999	20.3528933827233	19.6134795464798	20.1910761857123
C4QNZ6	tr|C4QNZ6|C4QNZ6_SCHMA Phenylalanyl-tRNA synthetase alpha chain,putative OS=Schistosoma mansoni GN=Smp_101240 PE=4 SV=2	5	26.119	0.0744561	1.1281	0.46827	1.38345	FALSE	20.176222106711	20.0352289503706	19.9640702125422	19.8709098565331	19.4199333989275	19.4798671581661
C4QNZ7	tr|C4QNZ7|C4QNZ7_SCHMA Uncharacterized protein OS=Schistosoma mansoni GN=Smp_178210 PE=4 SV=1	4	45.324	1.06046e-05	4.97451	-3.44001	10.8529	TRUE	13.2980158167032	13.5125371649315	13.7208770455038	16.6220820343232	17.1443988846432	17.0849906393668
C4QP14	tr|C4QP14|C4QP14_SCHMA 60S ribosomal protein L7, putative OS=Schistosoma mansoni GN=Smp_101450 PE=4 SV=1	10	29.663	0.634712	0.197423	0.527406	1.44134	FALSE	22.285118146903	21.8172310523558	21.6966774519416	20.7449773444695	19.6769641010708	23.7948664826324
C4QP66	tr|C4QP66|C4QP66_SCHMA Uncharacterized protein OS=Schistosoma mansoni GN=Smp_178810 PE=4 SV=1	17	44.263	0.742132	0.129519	-0.0822069	1.05864	FALSE	22.3252491448839	22.6900361738138	22.4151273026059	22.66085372937	22.7769727820781	22.2392067599632
C4QPD0	tr|C4QPD0|C4QPD0_SCHMA Eukaryotic translation initiation factor 2c,putative OS=Schistosoma mansoni GN=Smp_179320 PE=4 SV=2	43	102.27	0.182623	0.738445	0.373401	1.2954	FALSE	23.6859727952454	23.6335060875041	23.6911703574146	23.38323120313	22.896743902114	23.6104725618108
C4QPD1;C4QPD2	tr|C4QPD1|C4QPD1_SCHMA Eukaryotic translation initiation factor 2c,putative OS=Schistosoma mansoni GN=Smp_102690.3 PE=3 SV=1;tr|C4QPD2|C4QPD2_SCHMA Eukaryotic translation initiation factor 2c,putative OS=Schistosoma mansoni GN=Smp_102690.2 PE=3 SV=1	15	105.07	0.0513372	1.28957	-2.7143	6.56273	FALSE	13.4170464471191	15.1693416689427	16.2921122080767	17.9215603007896	15.8074149993738	19.2924164900117
C4QPH4;C4QPH5	tr|C4QPH4|C4QPH4_SCHMA FAA4 Long-chain-fatty-acid--CoA ligase 4 OS=Schistosoma mansoni GN=Smp_103160.1 PE=4 SV=1;tr|C4QPH5|C4QPH5_SCHMA Long-chain-fatty-acid--CoA ligase OS=Schistosoma mansoni GN=Smp_103160.2 PE=4 SV=1	17	91.584	0.0663081	1.17843	-3.33211	10.0709	FALSE	14.5455569508449	13.3199928174869	13.7208770455038	16.5919562877187	14.5589818225798	20.4318320150841
C4QPK4;C4QPK3	tr|C4QPK4|C4QPK4_SCHMA Eukaryotictranslation initiation factor,putative OS=Schistosoma mansoni GN=Smp_103460.2 PE=4 SV=1;tr|C4QPK3|C4QPK3_SCHMA Eukaryotictranslation initiation factor,putative OS=Schistosoma mansoni GN=Smp_103460.1 PE=4 SV=1	14	31.912	0.339479	0.469187	-0.219173	1.16407	FALSE	21.7517457902355	21.5803370335378	21.5076921261214	21.7868715432361	21.6421734282663	22.0682481308602
C4QPK6	tr|C4QPK6|C4QPK6_SCHMA Mago nashi protein homolog OS=Schistosoma mansoni GN=Smp_103470.1 PE=4 SV=2	13	16.954	0.0277283	1.55708	0.602097	1.51792	FALSE	22.9820519290096	23.177446664062	22.8921690587174	22.3120548416125	22.6251801948411	22.3081416914111
C4QPQ0	tr|C4QPQ0|C4QPQ0_SCHMA Axonemal dynein intermediate chain, putative OS=Schistosoma mansoni GN=Smp_103920 PE=4 SV=1	2	71.781	0.0270422	1.56796	-0.846335	1.79793	FALSE	13.2980158167032	13.5125371649315	13.7208770455038	13.9317684421221	14.7895609346501	14.3491070018498
C4QPU0	tr|C4QPU0|C4QPU0_SCHMA Phospholipid-transporting ATPase OS=Schistosoma mansoni GN=Smp_104500 PE=3 SV=1	6	123.32	0.0295007	1.53017	-2.0866	4.24747	FALSE	13.2980158167032	14.7965222425963	16.1990819316779	16.6058243592573	17.0097022016219	16.9379046903444
C4QPU2	tr|C4QPU2|C4QPU2_SCHMA Vacuolar protein sorting-associated, putative OS=Schistosoma mansoni GN=Smp_104520 PE=3 SV=1	3	69.28	0.909626	0.0411374	-0.056243	1.03975	FALSE	15.2151842048522	14.4342872791472	16.1765569996863	15.1858878198255	15.1452456397073	15.6636239273409
C4QPU7	tr|C4QPU7|C4QPU7_SCHMA Phosphoglucomutase, putative OS=Schistosoma mansoni GN=Smp_180530.3 PE=3 SV=2	14	44.212	0.0101233	1.99468	0.791847	1.73129	FALSE	22.9177839849862	22.7034983699825	22.4568323788744	21.9417776475214	21.7878625071475	21.9729336593363
C4QPU8	tr|C4QPU8|C4QPU8_SCHMA Phosphoglucomutase, putative OS=Schistosoma mansoni GN=Smp_180530.4 PE=3 SV=2	5	44.898	0.270335	0.568098	0.391864	1.31209	FALSE	20.0635473581494	20.9000277582874	20.7992133729784	20.0798617100712	19.9380244817876	20.5693103093945
C4QPU9	tr|C4QPU9|C4QPU9_SCHMA Uncharacterized protein OS=Schistosoma mansoni GN=Smp_180540 PE=4 SV=1	5	30.921	0.0446355	1.35032	0.790486	1.72966	FALSE	20.3543271975074	20.0646988790842	19.5095461350929	18.8723447700465	19.1785683997785	19.5062002655398
C4QQ81;C4QQ82	tr|C4QQ81|C4QQ81_SCHMA NADH-ubiquinone oxidoreductase 39 kD subunit,putative OS=Schistosoma mansoni GN=Smp_106080.1 PE=4 SV=1;tr|C4QQ82|C4QQ82_SCHMA NADH-ubiquinone oxidoreductase 39 kD subunit,putative OS=Schistosoma mansoni GN=Smp_106080.2 PE=4 SV=1	14	37.678	0.999103	0.000389914	-0.000860368	1.0006	FALSE	19.5781205309792	20.6866818093545	20.53235938632	20.9276462838506	18.7086232840768	21.1634732614536
C4QRU8	tr|C4QRU8|C4QRU8_SCHMA Uncharacterized protein (Fragment) OS=Schistosoma mansoni GN=Smp_186680 PE=4 SV=1	2	15.139	4.73769e-07	6.32443	-5.76167	54.2546	TRUE	13.2980158167032	13.5125371649315	13.7208770455038	19.1891580562545	19.5611848512317	19.0661086241141
C4QT67	tr|C4QT67|C4QT67_SCHMA Uncharacterized protein (Fragment) OS=Schistosoma mansoni GN=Smp_190770 PE=4 SV=2	4	16.85	0.524602	0.28017	0.245591	1.18558	FALSE	19.7519882881319	19.825787720416	19.2354853096423	19.7529088823727	18.6921122762317	19.6314675453864
C4QT89	tr|C4QT89|C4QT89_SCHMA Stard10 protein, putative OS=Schistosoma mansoni GN=Smp_190970 PE=4 SV=2	3	18.493	0.0565526	1.24755	-3.03856	8.21673	FALSE	13.2980158167032	16.7072039469872	18.3242445273521	19.5769791480426	19.4006041103553	18.4675743742118
C4QTZ4;C4QTH5	tr|C4QTZ4|C4QTZ4_SCHMA Tsg101-related (Fragment) OS=Schistosoma mansoni GN=Smp_193270 PE=4 SV=2;tr|C4QTH5|C4QTH5_SCHMA Uncharacterized protein OS=Schistosoma mansoni GN=Smp_191690 PE=4 SV=2	2	7.5955	0.011647	1.93378	-1.33037	2.51467	FALSE	18.289794401706	19.0176730094315	18.3751265251872	19.8278679059981	20.4605309374217	19.3852985281809
C4QU00	tr|C4QU00|C4QU00_SCHMA Uncharacterized protein (Fragment) OS=Schistosoma mansoni GN=Smp_193330 PE=4 SV=1	5	14.357	0.0807096	1.09307	-0.774927	1.7111	FALSE	20.1419141440554	19.8081840188769	21.0295570688057	20.940646957198	21.3673039914453	20.9964856847252
C4QU01	tr|C4QU01|C4QU01_SCHMA Uncharacterized protein OS=Schistosoma mansoni GN=Smp_119910 PE=4 SV=1	8	53.095	0.0499933	1.30109	-0.602181	1.51801	FALSE	19.5496013955116	19.1953720112855	19.7121356975516	19.984278814862	20.3634821337663	19.9158904093792
C4QU02	tr|C4QU02|C4QU02_SCHMA Ribosomal protein S9, putative OS=Schistosoma mansoni GN=Smp_119920 PE=3 SV=1	9	16.859	0.0975238	1.01089	1.37117	2.58681	FALSE	24.1552247100362	23.9412994772736	24.1184285955197	22.6513858364675	21.3315168904611	24.1185332598081
C4QU53	tr|C4QU53|C4QU53_SCHMA Tsg101-related OS=Schistosoma mansoni GN=Smp_193790 PE=4 SV=1	4	29.008	0.0162379	1.78947	-0.936105	1.91336	FALSE	18.2250536874572	18.8013955678847	18.7723432952511	19.4083938660373	19.8995732836185	19.2991410025274
C4QU54	tr|C4QU54|C4QU54_SCHMA Spliceosome-associated protein, putative OS=Schistosoma mansoni GN=Smp_120320.1 PE=4 SV=1	13	73.956	0.894228	0.0485519	0.048989	1.03454	FALSE	19.3329501412448	18.7740729023721	18.4368211027873	18.6682088192159	19.3018404268918	18.4268279613658
C4QU57	tr|C4QU57|C4QU57_SCHMA Uncharacterized protein OS=Schistosoma mansoni GN=Smp_120350 PE=4 SV=1	7	60.354	0.0609363	1.21512	1.86703	3.64781	FALSE	15.6186640978679	17.2791079313183	17.7779368051262	15.4552007691009	15.9285575663679	13.6908642669623
C4QUB0	tr|C4QUB0|C4QUB0_SCHMA Uncharacterized protein OS=Schistosoma mansoni GN=Smp_120900 PE=4 SV=2	3	12.57	0.308924	0.510149	-0.610741	1.52704	FALSE	18.4140256325145	18.7184694952826	19.5398763261017	19.9998141967951	20.0544193075368	18.4503619437039
C4QUG0	tr|C4QUG0|C4QUG0_SCHMA tRNA (adenine(58)-N(1))-methyltransferase catalytic subunit TRMT61A OS=Schistosoma mansoni GN=Smp_194620 PE=3 SV=1	2	41.143	0.0864412	1.06328	0.652956	1.57239	FALSE	16.8887127343864	16.6266064055156	16.1101880294894	15.6448906822105	16.3310404876883	15.6907068598679
C7DPD5;G4VSY8	tr|C7DPD5|C7DPD5_SCHMA cAMP-dependent protein kinase catalytic subunit OS=Schistosoma mansoni PE=2 SV=1;tr|G4VSY8|G4VSY8_SCHMA Serine/threonine kinase OS=Schistosoma mansoni GN=Smp_152330 PE=3 SV=1	6	40.434	0.0899094	1.0462	-0.945925	1.92642	FALSE	17.6550202601137	18.1585532193267	18.653753731025	19.7168684508769	18.2716588899047	19.3165756415476
C7T4Z2	tr|C7T4Z2|C7T4Z2_SCHMA Caspase-7 OS=Schistosoma mansoni PE=2 SV=1	5	36.305	0.711269	0.147966	0.471621	1.38667	FALSE	18.3237506118893	13.5125371649315	16.6918323197843	16.1708676419647	15.7664449364518	15.1759454755965
E2EAJ1;G4VNM6	tr|E2EAJ1|E2EAJ1_SCHMA GDP-D-mannose-4,6-dehydratase OS=Schistosoma mansoni GN=GMD PE=2 SV=1;tr|G4VNM6|G4VNM6_SCHMA GDP-mannose 4,6-dehydratase OS=Schistosoma mansoni GN=Smp_153490 PE=3 SV=1	8	41.133	0.0111471	1.95284	-0.943631	1.92336	FALSE	19.2787125382502	19.710823040899	19.5638975711702	20.5580363915424	20.7311334951499	20.0951548399839
E7BBH9;G4VLL9	tr|E7BBH9|E7BBH9_SCHMA cGMP-dependent protein kinase 1 OS=Schistosoma mansoni GN=cGK1 PE=2 SV=1;tr|G4VLL9|G4VLL9_SCHMA Serine/threonine kinase OS=Schistosoma mansoni GN=Smp_123290 PE=4 SV=1	14	114.99	0.406495	0.390945	-0.717766	1.64463	FALSE	15.5567683428015	17.9021302742281	18.6524651938142	18.2652704176329	17.847672405877	18.1517181489918
E9LZR7;E9LZR8;G4VT44;G4VT45	tr|E9LZR7|E9LZR7_SCHMA Calmodulin 1 OS=Schistosoma mansoni PE=2 SV=1;tr|E9LZR8|E9LZR8_SCHMA Calmodulin 2 OS=Schistosoma mansoni PE=2 SV=1;tr|G4VT44|G4VT44_SCHMA Putative calmodulin OS=Schistosoma mansoni GN=Smp_026560.2 PE=4 SV=1;tr|G4VT45|G4VT45_SCHMA Put	6	16.807	0.628837	0.201462	-0.219816	1.16459	FALSE	22.3787236779077	22.6969875509441	21.9217925061462	22.908218903133	23.0282966622682	21.7204364056456
G4LU80	tr|G4LU80|G4LU80_SCHMA ATP-dependent RNA helicase, putative OS=Schistosoma mansoni GN=Smp_027970 PE=4 SV=1	6	88.105	0.667615	0.175474	0.101341	1.07277	FALSE	17.0033908918032	16.8533322781199	17.1193254125552	17.0426203111612	17.0450992903411	16.5843068177988
G4LU81	tr|G4LU81|G4LU81_SCHMA Serine dehydratase, putative OS=Schistosoma mansoni GN=Smp_137330 PE=4 SV=1	14	103.5	0.811123	0.0909132	0.137564	1.10005	FALSE	19.0292774560647	19.3925858230072	19.5669902168323	18.4342428750971	18.7500432114568	20.3918757419396
G4LU88	tr|G4LU88|G4LU88_SCHMA Uncharacterized protein OS=Schistosoma mansoni GN=Smp_168080 PE=4 SV=1	2	16.711	0.158329	0.800439	1.14829	2.21651	FALSE	19.0388493712865	18.7939478079829	18.2611031761782	18.3140097270083	18.3716673457114	15.9633484496988
G4LUA3	tr|G4LUA3|G4LUA3_SCHMA p25 alpha-related OS=Schistosoma mansoni GN=Smp_097490 PE=4 SV=1	11	19.049	0.000347266	3.45934	-1.99432	3.98429	TRUE	22.9818550244571	22.9261787692076	22.6559338461061	24.99814051815	25.1342144724104	24.414583698076
G4LUA8;G4LUA9	tr|G4LUA8|G4LUA8_SCHMA Protein RER1 OS=Schistosoma mansoni GN=Smp_019490.1 PE=3 SV=1;tr|G4LUA9|G4LUA9_SCHMA Protein RER1 OS=Schistosoma mansoni GN=Smp_019490.4 PE=3 SV=1	4	21.894	0.0622138	1.20611	0.795216	1.73534	FALSE	19.843996019943	19.9746892576877	19.8097152030728	18.5590237311143	18.9255613887287	19.7581659659728
G4LUB6	tr|G4LUB6|G4LUB6_SCHMA Translation factor sui1, putative OS=Schistosoma mansoni GN=Smp_019440 PE=4 SV=1	6	12.49	0.349215	0.456907	0.284116	1.21766	FALSE	22.7467134306813	22.1197266778369	21.9292877593169	21.8135464613444	22.0043980261826	22.1254349370135
G4LUB7	tr|G4LUB7|G4LUB7_SCHMA Uncharacterized protein OS=Schistosoma mansoni GN=Smp_019430 PE=4 SV=1	8	32.411	0.160282	0.795115	0.458147	1.37378	FALSE	21.0853940604477	20.9793390950885	20.360833186117	20.3912031406475	20.587996421991	20.0719256629074
G4LUC1	tr|G4LUC1|G4LUC1_SCHMA Eukariotic translation initiation factor 2b,epsilon subunit, putative OS=Schistosoma mansoni GN=Smp_019380 PE=4 SV=1	7	85.415	0.0244279	1.61211	-2.00561	4.01559	FALSE	14.9056522044956	16.4310480579756	17.312420699595	18.2945794173419	17.6484599296529	18.7229221578583
G4LUC3	tr|G4LUC3|G4LUC3_SCHMA Uncharacterized protein OS=Schistosoma mansoni GN=Smp_019350 PE=4 SV=1	4	14.128	0.51465	0.288488	-0.477764	1.39258	FALSE	21.0763852307406	23.2002842607247	23.0398527132886	23.7041718071611	22.2799984463251	22.7656444466688
G4LUC5	tr|G4LUC5|G4LUC5_SCHMA Fatty acid desaturase, putative OS=Schistosoma mansoni GN=Smp_132740 PE=4 SV=1	4	57.978	0.00268813	2.57055	-3.70408	13.0328	TRUE	13.2980158167032	13.5125371649315	15.910765092536	17.6618912548221	17.8323658297852	18.3392867938931
G4LUD1	tr|G4LUD1|G4LUD1_SCHMA mRNA-capping enzyme, putative OS=Schistosoma mansoni GN=Smp_132720.1 PE=4 SV=1	2	47.762	0.0137383	1.86207	0.64916	1.56825	FALSE	17.6730848641173	17.4904013413974	17.4580854389477	16.9495631944322	16.9263725920593	16.7981560794714
G4LUD7	tr|G4LUD7|G4LUD7_SCHMA RuvB-like helicase OS=Schistosoma mansoni GN=Smp_132690 PE=3 SV=1	22	51.849	0.307359	0.512354	0.23697	1.17851	FALSE	22.8762248952964	23.1984069171102	23.3375559419164	22.8154412692403	23.0007298083752	22.8851072018638
G4LUD9	tr|G4LUD9|G4LUD9_SCHMA Myosin regulatory light chain, putative OS=Schistosoma mansoni GN=Smp_132670.1 PE=4 SV=1	9	22.719	0.66518	0.177061	0.175408	1.12928	FALSE	20.6289262537693	21.366730234983	20.6299532513302	21.123850439736	20.0451822777748	20.9303517831629
G4LUE4	tr|G4LUE4|G4LUE4_SCHMA Protein CLP1 homolog OS=Schistosoma mansoni GN=Smp_019130 PE=3 SV=1	2	48.921	0.0367604	1.43462	-1.1539	2.22515	FALSE	16.2818317277614	16.0961772200512	17.5777040459324	17.7280558898979	17.8990223913414	17.7903414892105
G4LUE8;G4LUE7	tr|G4LUE8|G4LUE8_SCHMA Transmembrane gtpase mfn (Mitofusin 1) (Fzo homolog), putative OS=Schistosoma mansoni GN=Smp_132620.2 PE=3 SV=1;tr|G4LUE7|G4LUE7_SCHMA Transmembrane gtpase mfn (Mitofusin 1) (Fzo homolog), putative OS=Schistosoma mansoni GN=Smp_13262	10	87.486	0.00852569	2.06927	-0.84708	1.79886	FALSE	17.303472940168	17.5582741485703	17.733662382437	18.2257140464219	18.3572123400901	18.5537227783182
G4LUE9	tr|G4LUE9|G4LUE9_SCHMA Eh domain containing/past-1-related OS=Schistosoma mansoni GN=Smp_019100 PE=3 SV=1	8	62.177	0.00055299	3.25728	2.43066	5.39139	TRUE	17.666435136166	17.8751921537142	18.1148801031315	14.8640378430012	16.0675413241511	15.4329583122429
G4LUF3	tr|G4LUF3|G4LUF3_SCHMA Hyaluronidase, putative OS=Schistosoma mansoni GN=Smp_000020 PE=4 SV=1	14	120.85	0.715375	0.145466	-0.0991146	1.07112	FALSE	19.2050173303328	18.8822618684409	19.1477015749797	19.2954189448393	18.771336000604	19.465569577205
G4LUF6;G4LUF5;G4LUF4	tr|G4LUF6|G4LUF6_SCHMA 26s proteasome regulatory particle subunit,putative OS=Schistosoma mansoni GN=Smp_000030.1 PE=4 SV=1;tr|G4LUF5|G4LUF5_SCHMA 26s proteasome regulatory particle subunit,putative OS=Schistosoma mansoni GN=Smp_000030.2 PE=4 SV=1;tr|G4LUF	36	110.29	0.169697	0.770326	-0.473596	1.38857	FALSE	20.5250547827542	21.0163358575228	21.3379360486347	21.4220547343019	21.1265221666793	21.7515382286338
G4LUF7	tr|G4LUF7|G4LUF7_SCHMA Kinesin light chain, putative OS=Schistosoma mansoni GN=Smp_000040 PE=4 SV=1	18	47.158	0.789297	0.10276	0.0532276	1.03758	FALSE	21.0287628782789	21.0152206167745	20.8900498372999	20.7625242969154	21.0471172972805	20.9647090655514
G4LUG1	tr|G4LUG1|G4LUG1_SCHMA 1-acyl-sn-glycerol-3-phosphate acyltransferase OS=Schistosoma mansoni GN=Smp_000070 PE=3 SV=1	4	29.916	0.136706	0.864214	-0.760496	1.69407	FALSE	18.7192665689405	18.7653590700344	20.0189417700502	19.9646472112033	19.5043900708935	20.3160194203169
G4LUG6	tr|G4LUG6|G4LUG6_SCHMA Uncharacterized protein Smp_127580 OS=Schistosoma mansoni GN=Smp_127580 PE=4 SV=1	10	71.639	0.781659	0.106983	-0.106269	1.07644	FALSE	16.2553846342073	16.9957293520612	17.2409055854265	17.3143346071054	17.0318711119955	16.4646203910919
G4LUG8	tr|G4LUG8|G4LUG8_SCHMA Uncharacterized protein Smp_010230 OS=Schistosoma mansoni GN=Smp_010230 PE=4 SV=1	10	34.765	0.00318224	2.49727	-0.966395	1.95395	FALSE	22.2592339187338	22.3966875085955	22.0908720418312	23.2218098025899	23.351396251366	23.0727712832606
G4LUH9	tr|G4LUH9|G4LUH9_SCHMA Translocon-associated protein, beta subunit (Trap-beta) (Signal sequence receptor beta subunit), putative OS=Schistosoma mansoni GN=Smp_009830 PE=4 SV=1	2	17.259	0.302831	0.5188	0.312147	1.24155	FALSE	18.8092839739171	19.5317088485825	19.2438589028159	18.6571604740942	18.8222641887186	19.1689863114664
G4LUI6	tr|G4LUI6|G4LUI6_SCHMA NADH-ubiquinone oxidoreductase fe-s protein 2 (Ndufs2), putative OS=Schistosoma mansoni GN=Smp_127340 PE=3 SV=1	17	76.516	0.645515	0.190094	0.0982872	1.0705	FALSE	20.4034350354658	20.8220410423613	20.7033441622124	20.5379377225663	20.5037460645035	20.5922747775261
G4LUI7;G4LUI8	tr|G4LUI7|G4LUI7_SCHMA 14-3-3 protein, putative OS=Schistosoma mansoni GN=Smp_009780.1 PE=3 SV=1;tr|G4LUI8|G4LUI8_SCHMA 14-3-3 protein, putative OS=Schistosoma mansoni GN=Smp_009780.2 PE=3 SV=1	17	28.185	0.745604	0.127492	-0.0696067	1.04943	FALSE	24.8085014252454	24.7779596157542	24.5042325163082	24.9368210248109	24.7256099846285	24.6370826915356
G4LUJ3	tr|G4LUJ3|G4LUJ3_SCHMA Uncharacterized protein OS=Schistosoma mansoni GN=Smp_121460 PE=4 SV=1	2	28.168	0.456892	0.340187	0.257194	1.19515	FALSE	17.3898305265518	16.4650254092917	17.1939112384341	17.0790971657815	16.5145993273127	16.6834895563534
G4LUJ6;G4LUJ7	tr|G4LUJ6|G4LUJ6_SCHMA Proteasome subunit beta type OS=Schistosoma mansoni GN=Smp_121430.2 PE=3 SV=1;tr|G4LUJ7|G4LUJ7_SCHMA Proteasome subunit beta type OS=Schistosoma mansoni GN=Smp_121430.1 PE=3 SV=1	9	23.031	0.279114	0.554219	0.260845	1.19818	FALSE	22.8994493322896	22.9437669062892	22.5315741146473	22.5850964754651	22.3491293366073	22.6580303754493
G4LUK0	tr|G4LUK0|G4LUK0_SCHMA Glycylpeptide N-tetradecanoyltransferase OS=Schistosoma mansoni GN=Smp_121420 PE=3 SV=1	9	53.053	0.402002	0.395772	1.20605	2.30705	FALSE	16.5185754240968	16.2194561260934	15.4903161090221	13.2833653882194	13.3388459562242	17.9879888959903
G4LUK8;G4LUK7	tr|G4LUK8|G4LUK8_SCHMA NADH-ubiquinone oxidoreductase, putative OS=Schistosoma mansoni GN=Smp_038870.1 PE=3 SV=1;tr|G4LUK7|G4LUK7_SCHMA NADH-ubiquinone oxidoreductase, putative OS=Schistosoma mansoni GN=Smp_038870.2 PE=4 SV=1	24	76.207	0.147773	0.830404	0.387106	1.30777	FALSE	21.1090259572378	21.0608889427831	21.4442736482654	20.9964269344419	20.916895169784	20.5395498254926
G4LUM3;Q15ER4	tr|G4LUM3|G4LUM3_SCHMA Uncharacterized protein OS=Schistosoma mansoni GN=Smp_037290 PE=4 SV=1;tr|Q15ER4|Q15ER4_SCHMA Predicted actin-bundling protein-like protein OS=Schistosoma mansoni PE=2 SV=1	5	32.536	0.155279	0.808888	0.589785	1.50502	FALSE	19.0094774048385	19.006729698259	18.0283243472489	17.7959324854123	18.0181823489322	18.4610621697745
G4LUP0	tr|G4LUP0|G4LUP0_SCHMA 26S proteasome subunit S9, putative OS=Schistosoma mansoni GN=Smp_061650 PE=4 SV=1	22	46.629	0.482944	0.316103	0.179209	1.13226	FALSE	23.0043247010805	22.7342639748046	22.5957438571523	22.4287656990796	22.914947536383	22.4529931729003
G4LUP2	tr|G4LUP2|G4LUP2_SCHMA Sp17 protein, putative OS=Schistosoma mansoni GN=Smp_155280 PE=4 SV=1	8	45.623	0.0079602	2.09908	-3.68076	12.8239	TRUE	13.2980158167032	16.7726449523496	15.2010040168784	19.3042945721751	19.0969915947188	17.9126724565845
G4LUP4	tr|G4LUP4|G4LUP4_SCHMA Protein farnesyltransferase alpha subunit,putative OS=Schistosoma mansoni GN=Smp_091770 PE=4 SV=1	4	19.931	0.670537	0.173577	0.184904	1.13674	FALSE	19.1247168382468	19.106573409612	18.9509193040845	19.2666476922395	19.3767541251713	17.9840954900087
G4LUR0	tr|G4LUR0|G4LUR0_SCHMA Serine/threonine protein phosphatase 2a regulatory subunit A, putative OS=Schistosoma mansoni GN=Smp_172280 PE=4 SV=1	19	66.082	0.614225	0.211672	0.112384	1.08101	FALSE	21.5244465496796	21.4795302643487	21.5121695966279	21.5327817510287	21.5430622352492	21.1031495670148
G4LUR1	tr|G4LUR1|G4LUR1_SCHMA Uncharacterized protein OS=Schistosoma mansoni GN=Smp_172300 PE=4 SV=1	2	10.881	0.218639	0.660272	1.98674	3.9634	FALSE	18.8062179541962	18.0402170001411	19.1513866217875	17.9600658740004	13.3388459562242	18.7386899667902
G4LUR5	tr|G4LUR5|G4LUR5_SCHMA Ubiquitin-specific peptidase 14 (C19 family) OS=Schistosoma mansoni GN=Smp_084740 PE=3 SV=1	11	45.348	0.0159631	1.79688	0.712245	1.63835	FALSE	21.4157467558984	21.6052712238894	21.514983895976	20.7322076382782	21.0610691051907	20.6059907088123
G4LUS4;G4LUS3	tr|G4LUS4|G4LUS4_SCHMA Uncharacterized protein OS=Schistosoma mansoni GN=Smp_154610.2 PE=4 SV=1;tr|G4LUS3|G4LUS3_SCHMA Uncharacterized protein OS=Schistosoma mansoni GN=Smp_154610.1 PE=4 SV=1	34	85.39	0.00437197	2.35932	0.834749	1.78355	FALSE	23.7914692170694	23.8395293730772	23.9796069860387	23.0252163963311	23.1304060404348	22.9507349562352
G4LUU2	tr|G4LUU2|G4LUU2_SCHMA 60S ribosomal protein L18, putative OS=Schistosoma mansoni GN=Smp_031570 PE=4 SV=1	6	21.406	0.456537	0.340524	1.30982	2.4791	FALSE	21.4052863023724	21.5891814398599	20.6597812196882	18.965619649582	17.1189726151143	23.6402011397827
G4LUW0	tr|G4LUW0|G4LUW0_SCHMA Prohibitin, putative OS=Schistosoma mansoni GN=Smp_075940 PE=4 SV=1	10	23.133	0.00588075	2.23057	0.779057	1.71601	FALSE	24.4833602964653	24.3658684138048	24.4815014436988	23.6139365089399	23.789287636043	23.5903335314504
G4LUW3	tr|G4LUW3|G4LUW3_SCHMA Isocitrate dehydrogenase [NADP] OS=Schistosoma mansoni GN=Smp_163050 PE=3 SV=1	20	50.74	0.413609	0.38341	-0.15817	1.11587	FALSE	22.4127553523598	22.2337639965064	22.3314605748735	22.5373812077647	22.472357007771	22.4427526735848
G4LUX9	tr|G4LUX9|G4LUX9_SCHMA Serine/threonine protein phosphatase 2A regulatory subunit OS=Schistosoma mansoni GN=Smp_176600 PE=3 SV=1	9	71.887	0.2897	0.538052	0.536754	1.45071	FALSE	19.259802468511	19.2518289930055	18.3066134897214	18.6820964393186	17.607160208652	18.9187249958773
G4LUY0	tr|G4LUY0|G4LUY0_SCHMA DNA-directed rna polymerase II subunit,putative OS=Schistosoma mansoni GN=Smp_099170 PE=4 SV=1	9	30.166	0.0903246	1.04419	1.03634	2.05101	FALSE	20.03441316443	19.9732035443654	19.6840556706344	19.3069907257933	19.5394927110389	17.7361750736307
G4LUY3	tr|G4LUY3|G4LUY3_SCHMA Serine/threonine kinase OS=Schistosoma mansoni GN=Smp_176620 PE=4 SV=1	9	127.37	0.596435	0.224437	0.635079	1.55302	FALSE	13.6242862817127	15.6459684312191	16.3018261373519	13.6219350594311	13.3388459562242	16.7060624817371
G4LUY4	tr|G4LUY4|G4LUY4_SCHMA Selenocysteine-specific elongation factor,putative OS=Schistosoma mansoni GN=Smp_176630 PE=4 SV=1	7	57.515	0.245348	0.610218	-1.28634	2.43909	FALSE	15.1723136413003	17.9125407624588	19.1535240412987	18.6567505957127	18.7879286312212	18.652721073205
G4LUY9	tr|G4LUY9|G4LUY9_SCHMA Protein transport protein Sec23, putative OS=Schistosoma mansoni GN=Smp_099310 PE=4 SV=1	8	89.307	0.764689	0.116515	-0.136689	1.09938	FALSE	16.6807525809489	17.6755961916773	17.4604232691658	17.8298689964709	16.6643950705224	17.732574747238
G4LUZ0	tr|G4LUZ0|G4LUZ0_SCHMA Eukaryotic translation initiation factor 3 subunit K OS=Schistosoma mansoni GN=Smp_099320 PE=3 SV=1	9	28.479	0.0435245	1.36127	0.671652	1.5929	FALSE	21.6216144317243	22.2418912436521	21.9200395350425	21.2675959035337	21.5129761338007	20.9880172075363
G4LUZ6	tr|G4LUZ6|G4LUZ6_SCHMA SPFH domain / Band 7 family protein,putative OS=Schistosoma mansoni GN=Smp_210110 PE=4 SV=1	7	49.91	0.100668	0.99711	-0.365865	1.28865	FALSE	18.884396043613	19.1630147748578	18.9373373087055	19.3768412259029	19.3799818532489	19.3255208274655
G4LV10	tr|G4LV10|G4LV10_SCHMA Uncharacterized protein OS=Schistosoma mansoni GN=Smp_162140 PE=4 SV=1	6	28.558	1.07488e-05	4.96864	-6.86461	116.534	TRUE	13.2980158167032	15.0065237162938	13.7208770455038	20.77266724555	21.2308953077806	20.6156736735187
G4LV14	tr|G4LV14|G4LV14_SCHMA Sh3-containing grb2-like protein 3 (Endophilin III) OS=Schistosoma mansoni GN=Smp_036990 PE=4 SV=1	2	41.663	0.0406578	1.39086	2.84947	7.20735	FALSE	17.6018903995799	17.3705930946652	17.3605611078435	13.2833653882194	13.3388459562242	17.1624283299687
G4LV18;Q0JXE6;Q0JXE4	tr|G4LV18|G4LV18_SCHMA Uncharacterized protein OS=Schistosoma mansoni GN=Smp_142100 PE=4 SV=1;tr|Q0JXE6|Q0JXE6_SCHMA Transcriptional cofactor CA150 OS=Schistosoma mansoni GN=ca150 PE=2 SV=1;tr|Q0JXE4|Q0JXE4_SCHMA Transcriptional cofactor CA150 OS=Schistoso	36	242.43	0.144934	0.838828	0.398009	1.31769	FALSE	20.5963704491916	20.1428282158441	19.9729968150471	19.7518298732753	19.9353404804413	19.8309985054609
G4LV29	tr|G4LV29|G4LV29_SCHMA 28S ribosomal protein S16, mitochondrial,putative OS=Schistosoma mansoni GN=Smp_066480 PE=4 SV=1	5	28.522	0.000915388	3.03839	2.30523	4.94245	TRUE	20.004038707415	19.662045899209	19.4672877702886	18.07135247158	16.8338397659907	17.3124967213792
G4LV34	tr|G4LV34|G4LV34_SCHMA Camp-dependent protein kinase type II-alpha regulatory subunit, putative OS=Schistosoma mansoni GN=Smp_079010 PE=4 SV=1	15	42.996	0.24164	0.616832	-0.262737	1.19975	FALSE	21.7847971646541	21.9315612184487	21.6939265324052	22.1380979154296	22.1978387304973	21.862559246573
G4LV39	tr|G4LV39|G4LV39_SCHMA Apoptosis inhibitor, putative OS=Schistosoma mansoni GN=Smp_197180 PE=4 SV=1	11	61.2	0.883448	0.0538189	-0.262559	1.1996	FALSE	15.4477559992557	15.5484542016515	14.8686808008642	13.6935357333477	13.3388459562242	19.6201864824157
G4LV40;G4LV41	tr|G4LV40|G4LV40_SCHMA 26S proteasome regulatory subunit S3, putative OS=Schistosoma mansoni GN=Smp_085310.2 PE=4 SV=1;tr|G4LV41|G4LV41_SCHMA 26S proteasome regulatory subunit S3, putative OS=Schistosoma mansoni GN=Smp_085310.1 PE=4 SV=1	22	57.793	0.550109	0.259551	-0.14974	1.10937	FALSE	21.6860030128675	22.0490137915381	22.2541481622074	22.2605112308418	21.9498120654945	22.2280631290702
G4LV42	tr|G4LV42|G4LV42_SCHMA 60S ribosomal protein L22, putative OS=Schistosoma mansoni GN=Smp_085300 PE=4 SV=1	4	15.41	0.00316744	2.49929	2.63745	6.22231	TRUE	24.4674506286034	23.9354158621393	24.2978763710805	21.7305654126702	22.5599559838637	20.4978735704839
G4LV45;G4LV43;G4LV44	tr|G4LV45|G4LV45_SCHMA Tropomyosin, putative OS=Schistosoma mansoni GN=Smp_085290.3 PE=4 SV=1;tr|G4LV43|G4LV43_SCHMA Tropomyosin, putative OS=Schistosoma mansoni GN=Smp_085290.1 PE=4 SV=1;tr|G4LV44|G4LV44_SCHMA Tropomyosin, putative OS=Schistosoma mansoni	2	23.254	0.311664	0.506313	-1.62363	3.08148	FALSE	18.4147843467266	13.5125371649315	18.9429090430993	18.1027244964476	18.9618558379685	18.6765264357282
G4LV50	tr|G4LV50|G4LV50_SCHMA SEC23-interacting protein (P125),putative OS=Schistosoma mansoni GN=Smp_197190 PE=4 SV=1	7	121.92	0.224213	0.649339	1.29692	2.45704	FALSE	16.9030257670506	17.2155498932231	16.3836243346133	16.6143983085774	13.3388459562242	16.6581875442088
G4LV53	tr|G4LV53|G4LV53_SCHMA Interleukin enhancer binding factor, putative OS=Schistosoma mansoni GN=Smp_141000 PE=4 SV=1	4	42.151	0.443963	0.352653	0.657105	1.57692	FALSE	19.058028927301	16.9752561266711	19.9868482108524	17.7592705935394	17.6833588705576	18.6061874656671
G4LV54	tr|G4LV54|G4LV54_SCHMA Fer-1-related OS=Schistosoma mansoni GN=Smp_141010 PE=4 SV=1	40	219.17	0.000293668	3.53214	-1.93784	3.8313	TRUE	17.5343222013496	17.4065833085837	17.9648042763916	19.7865496012861	19.6150084770701	19.3176574037068
G4LV68;G4LV69	tr|G4LV68|G4LV68_SCHMA Mitochondrial processing peptidase non-peptidase alpha subunit (M16 family) OS=Schistosoma mansoni GN=Smp_094050.2 PE=3 SV=1;tr|G4LV69|G4LV69_SCHMA Mitochondrial processing peptidase non-peptidase alpha subunit (M16 family) OS=Schist	21	58.766	0.000865967	3.0625	1.27106	2.41339	TRUE	22.2076297640188	22.3226511306854	22.5534315042577	20.9665604286845	21.2194191252518	21.0845582178244
G4LV70	tr|G4LV70|G4LV70_SCHMA Phenylalanyl-tRNA synthetase beta chain,putative OS=Schistosoma mansoni GN=Smp_094060 PE=4 SV=1	24	69.519	0.00427319	2.36925	1.12579	2.18221	TRUE	21.7388696776243	21.793128957984	21.1537752943542	20.4196409388362	20.346634415047	20.5421230805062
G4LV71	tr|G4LV71|G4LV71_SCHMA Uncharacterized protein OS=Schistosoma mansoni GN=Smp_173670 PE=4 SV=1	2	27.505	0.207837	0.682278	2.1566	4.45862	FALSE	19.3039140638653	19.2116147271715	18.8030629145344	18.5673071703733	13.3388459562242	18.942645428421
G4LV72	tr|G4LV72|G4LV72_SCHMA Uncharacterized protein OS=Schistosoma mansoni GN=Smp_173680 PE=4 SV=1	2	19.273	0.203834	0.690724	2.37172	5.17557	FALSE	19.5258383495488	19.3266125150805	19.9437266039219	18.6237344709411	13.3388459562242	19.7184469907398
G4LV73	tr|G4LV73|G4LV73_SCHMA Uncharacterized protein OS=Schistosoma mansoni GN=Smp_173690 PE=4 SV=1	3	21.588	0.201134	0.696514	0.796764	1.7372	FALSE	20.3114552843688	20.1796003670532	20.6309687967453	19.7251999613165	18.4443658258528	20.5621652664282
G4LV78	tr|G4LV78|G4LV78_SCHMA Uncharacterized protein OS=Schistosoma mansoni GN=Smp_081440 PE=4 SV=1	3	22.758	0.00839371	2.07605	3.65823	12.6251	TRUE	18.3555891651849	17.5129608912979	18.2448616550976	13.2833653882194	13.3388459562242	16.5165218764459
G4LV80;G4LV81	tr|G4LV80|G4LV80_SCHMA 6-phosphogluconolactonase OS=Schistosoma mansoni GN=Smp_081460.3 PE=4 SV=1;tr|G4LV81|G4LV81_SCHMA 6-phosphogluconolactonase OS=Schistosoma mansoni GN=Smp_081460.1 PE=4 SV=1	8	26.621	0.632915	0.198654	0.148951	1.10876	FALSE	21.4817772016451	21.5526600855463	21.0914459877503	21.4312953465183	21.5184660374918	20.7292703001218
G4LV83	tr|G4LV83|G4LV83_SCHMA Uncharacterized protein OS=Schistosoma mansoni GN=Smp_166050 PE=4 SV=1	11	223.19	0.0625624	1.20369	2.11639	4.33608	FALSE	17.6230545120024	17.0387198125034	17.6474333341638	15.6286804550293	13.3388459562242	16.9925116909821
G4LV86	tr|G4LV86|G4LV86_SCHMA Striatin, putative OS=Schistosoma mansoni GN=Smp_166080.2 PE=4 SV=1	14	98.462	0.00781216	2.10723	-0.763397	1.69748	FALSE	20.556466903789	20.4597496224361	20.2915928229026	21.1018590637719	21.3139450949137	21.1821949980432
G4LV90	tr|G4LV90|G4LV90_SCHMA Eukaryotictranslation initiation factor,putative OS=Schistosoma mansoni GN=Smp_176040 PE=4 SV=1	4	95.365	0.00565473	2.24759	1.12082	2.17471	TRUE	18.8687634641064	18.3336399258847	18.1314320154119	17.4776755496215	17.3104739541897	17.1832174725952
G4LV91	tr|G4LV91|G4LV91_SCHMA Uncharacterized protein OS=Schistosoma mansoni GN=Smp_192360 PE=4 SV=1	9	18.913	0.0219412	1.65874	0.971811	1.9613	FALSE	22.5959523839093	22.9618073610307	22.2413120252353	21.9495109067697	21.7606193899917	21.1735077758492
G4LV93	tr|G4LV93|G4LV93_SCHMA Ubiquitin ligase E3 alpha-related OS=Schistosoma mansoni GN=Smp_176060 PE=4 SV=1	8	295.29	0.492123	0.307926	-0.560031	1.4743	FALSE	13.2980158167032	12.3066564496699	10.6498757553122	12.4884122010413	11.9562038870383	13.4900264027511
G4LV96	tr|G4LV96|G4LV96_SCHMA Uncharacterized protein OS=Schistosoma mansoni GN=Smp_098090 PE=4 SV=1	6	33.057	0.0296611	1.52781	2.3189	4.98952	FALSE	19.9226905477557	19.6410365537219	19.9694863245821	19.0064041113572	17.7946245082865	15.7754854844334
G4LV97;B8Y6H6	tr|G4LV97|G4LV97_SCHMA Uncharacterized protein OS=Schistosoma mansoni GN=Smp_176080 PE=4 SV=1;tr|B8Y6H6|B8Y6H6_SCHMA DIF_8 (Fragment) OS=Schistosoma mansoni PE=2 SV=1	3	33.194	0.00507914	2.29421	2.95534	7.75616	TRUE	18.124823845902	17.9406223535213	17.1208684020509	15.5726402123183	13.3388459562242	15.4087979968799
G4LV98	tr|G4LV98|G4LV98_SCHMA Fbxl4, putative OS=Schistosoma mansoni GN=Smp_176090 PE=4 SV=1	7	77.42	0.000413656	3.38336	-3.99269	15.9191	TRUE	13.2980158167032	14.956523797567	15.2091988279855	18.1916359411718	18.4257032925561	18.8244599641127
G4LVA2	tr|G4LVA2|G4LVA2_SCHMA 60S ribosomal protein L35, putative OS=Schistosoma mansoni GN=Smp_197220 PE=4 SV=1	4	56.303	0.0672082	1.17258	-2.54099	5.81987	FALSE	16.0100954599152	13.5125371649315	18.1034138869973	18.7287872695243	18.0643893691418	18.4558311582866
G4LVA3	tr|G4LVA3|G4LVA3_SCHMA Adenylate kinase, putative OS=Schistosoma mansoni GN=Smp_197230 PE=3 SV=1	5	44.948	6.73401e-06	5.17173	-5.11164	34.5745	TRUE	13.2980158167032	13.5125371649315	13.7208770455038	18.3770123041454	19.2562085111387	18.2331202682526
G4LVB5	tr|G4LVB5|G4LVB5_SCHMA Uncharacterized protein OS=Schistosoma mansoni GN=Smp_033660 PE=4 SV=1	4	48.992	0.58132	0.235585	0.548877	1.46295	FALSE	17.2825225450111	18.1368567077168	16.4285695063557	14.8795419180631	17.0386670933251	18.2831091929481
G4LVB6;G4LVC0;G4LVB9;G4LVB8;G4LVB7	tr|G4LVB6|G4LVB6_SCHMA ATP synthase gamma subunit, putative OS=Schistosoma mansoni GN=Smp_033670.5 PE=3 SV=1;tr|G4LVC0|G4LVC0_SCHMA ATP synthase gamma subunit, putative OS=Schistosoma mansoni GN=Smp_033670.4 PE=4 SV=1;tr|G4LVB9|G4LVB9_SCHMA ATP synthase su	8	32.088	0.4129	0.384155	0.386187	1.30693	FALSE	22.2910902344721	23.226214525088	23.1153679843673	23.2524382377899	22.1813209322298	22.0403523335941
G4LVC1	tr|G4LVC1|G4LVC1_SCHMA Uncharacterized protein OS=Schistosoma mansoni GN=Smp_033680 PE=4 SV=1	3	32.608	0.0250555	1.6011	1.60765	3.04754	FALSE	20.6650622614993	19.3516527965398	19.0928061474257	18.0139844894461	18.7650012508551	17.5075965538653
G4LVC5	tr|G4LVC5|G4LVC5_SCHMA DNA photolyase, putative OS=Schistosoma mansoni GN=Smp_033700 PE=4 SV=1	10	61.481	0.00226856	2.64425	1.32442	2.50432	TRUE	19.0013019367043	18.9018179318934	19.2158861772913	18.0695445105141	17.7166695295541	17.3595320753168
G4LVC7;I6TRR3	tr|G4LVC7|G4LVC7_SCHMA DEAD box ATP-dependent RNA helicase, putative OS=Schistosoma mansoni GN=Smp_033710 PE=3 SV=1;tr|I6TRR3|I6TRR3_SCHMA Vasa-like DEAD-box RNA helicase OS=Schistosoma mansoni GN=vlg1 PE=2 SV=1	34	71.08	0.0129751	1.88689	0.801411	1.74281	FALSE	22.9313071890029	22.7493746048968	22.7307601246376	22.1195579098102	21.6799868909369	22.2076635202779
G4LVD1;G4LVD2	tr|G4LVD1|G4LVD1_SCHMA Uncharacterized protein OS=Schistosoma mansoni GN=Smp_033760.2 PE=4 SV=1;tr|G4LVD2|G4LVD2_SCHMA Uncharacterized protein OS=Schistosoma mansoni GN=Smp_033760.1 PE=4 SV=1	32	75.25	0.00498522	2.30232	0.882456	1.84351	FALSE	23.3961169507179	23.2470419318722	23.1408418969955	22.33693229108	22.5635090942839	22.2361905610459
G4LVD3	tr|G4LVD3|G4LVD3_SCHMA Uncharacterized protein OS=Schistosoma mansoni GN=Smp_033770 PE=4 SV=1	8	104.68	0.00751775	2.12391	3.03857	8.21674	TRUE	16.9693925646081	16.9787065200428	17.6604002692754	13.2833653882194	13.3388459562242	15.8705902287963
G4LVD6	tr|G4LVD6|G4LVD6_SCHMA 5-3 exoribonuclease, putative OS=Schistosoma mansoni GN=Smp_140420 PE=4 SV=1	6	188.1	0.494242	0.30606	0.382692	1.30377	FALSE	14.0944890515747	13.9824065123346	15.2652485198311	14.0246576174715	13.3388459562242	14.8305649268171
G4LVE0	tr|G4LVE0|G4LVE0_SCHMA Cleavage and polyadenylation specificity factor,putative OS=Schistosoma mansoni GN=Smp_211110 PE=4 SV=1	6	81.151	0.047533	1.323	0.523204	1.43714	FALSE	19.2670925044415	18.9004541916244	19.1910986089405	18.6688949516386	18.6930306053785	18.4271064201663
G4LVE1;O02197	tr|G4LVE1|G4LVE1_SCHMA Cleavage and polyadenylation specificity factor,putative OS=Schistosoma mansoni GN=Smp_211120 PE=4 SV=1;sp|O02197|CCA_SCHMA Circulating cathodic antigen OS=Schistosoma mansoni PE=1 SV=1	7	38.366	0.795506	0.0993564	0.101013	1.07253	FALSE	19.6547485498503	19.5774064402831	19.2020430657862	19.7610354166816	19.7338304914335	18.6362926169104
G4LVE5	tr|G4LVE5|G4LVE5_SCHMA Arginine/serine-rich splicing factor, putative OS=Schistosoma mansoni GN=Smp_185230 PE=4 SV=1	11	23.244	0.0361919	1.44139	0.707321	1.63277	FALSE	24.4380585020894	24.2434047660687	24.0655774637857	23.6775862456937	23.8139514397545	23.1335413685316
G4LVE7	tr|G4LVE7|G4LVE7_SCHMA ATP synthase f chain, mitochondrial-related OS=Schistosoma mansoni GN=Smp_140480 PE=4 SV=1	3	13.079	0.400421	0.397483	0.169884	1.12497	FALSE	21.3189105238795	21.3637438206837	21.1871455555582	21.2141914643134	20.9870433246824	21.1589118061618
G4LVF8	tr|G4LVF8|G4LVF8_SCHMA Uncharacterized protein OS=Schistosoma mansoni GN=Smp_066610.1 PE=4 SV=1	7	17.971	0.00167212	2.77673	1.11458	2.16533	TRUE	21.6023387697429	21.6286669081856	21.2752310046083	20.3215604915637	20.4881623374529	20.3527614212806
G4LVF9	tr|G4LVF9|G4LVF9_SCHMA Mitochondrial ribosomal protein S25, putative OS=Schistosoma mansoni GN=Smp_066620 PE=4 SV=1	5	20.981	0.00816947	2.08781	3.55842	11.7812	TRUE	18.391017343862	19.3156338073434	19.1321335137327	16.386560451778	13.3388459562242	16.4381180366085
G4LVG1;G4LVG0	tr|G4LVG1|G4LVG1_SCHMA Eukaryotic peptide chain release factor subunit,putative OS=Schistosoma mansoni GN=Smp_066630.1 PE=4 SV=1;tr|G4LVG0|G4LVG0_SCHMA Eukaryotic peptide chain release factor subunit,putative OS=Schistosoma mansoni GN=Smp_066630.2 PE=4 SV=	9	49.598	0.154659	0.810626	0.355147	1.27912	FALSE	19.9430824085733	20.2045641248954	20.3371065957328	19.8958713586634	19.5935302405083	19.9299097283338
G4LVG4	tr|G4LVG4|G4LVG4_SCHMA Syntaxin, putative OS=Schistosoma mansoni GN=Smp_066670.1 PE=3 SV=1	2	33.405	0.771835	0.112476	-0.394345	1.31435	FALSE	16.4637266213187	15.9161330174793	15.5825647569011	18.0308466792906	13.3388459562242	17.7757653917991
G4LVG5	tr|G4LVG5|G4LVG5_SCHMA Fumarate hydratase OS=Schistosoma mansoni GN=Smp_158240 PE=4 SV=1	4	54.596	0.0661826	1.17926	0.691626	1.6151	FALSE	18.4076483583285	18.6747987186969	18.4077790444901	18.1855042697895	17.9937953078229	17.236047531922
G4LVG9	tr|G4LVG9|G4LVG9_SCHMA Mitochondrial 60S ribosomal protein L7/L12,putative OS=Schistosoma mansoni GN=Smp_066740 PE=3 SV=1	3	20.099	0.0177917	1.74978	1.0092	2.0128	FALSE	21.7037219656728	21.6580500230875	21.3091111993067	20.8856324833853	20.7640267860825	19.9936213768796
G4LVH2	tr|G4LVH2|G4LVH2_SCHMA DEAD box ATP-dependent RNA helicase, putative OS=Schistosoma mansoni GN=Smp_013790 PE=3 SV=1	24	85.415	0.136228	0.865733	-0.697167	1.62132	FALSE	20.8043039454075	20.8522599317772	21.0589481213393	21.8785645976779	20.7585542121802	22.1698934025548
G4LVH4	tr|G4LVH4|G4LVH4_SCHMA tRNA pseudouridine synthase D, putative OS=Schistosoma mansoni GN=Smp_129630 PE=4 SV=1	5	66.294	0.0778151	1.10894	1.41594	2.66833	FALSE	15.850054184384	16.12610365142	16.4424366136341	15.9035786826539	13.3388459562242	14.9283526169208
G4LVH6;G4LVH5	tr|G4LVH6|G4LVH6_SCHMA Non-specific serine/threonine protein kinase OS=Schistosoma mansoni GN=Smp_013840.1 PE=4 SV=1;tr|G4LVH5|G4LVH5_SCHMA Non-specific serine/threonine protein kinase OS=Schistosoma mansoni GN=Smp_013840.2 PE=4 SV=1	5	122.12	0.0954111	1.0204	0.407976	1.32682	FALSE	16.8483098277261	17.1092813099804	16.8856469872153	16.3725264634721	16.515877405923	16.7309065527145
G4LVH9	tr|G4LVH9|G4LVH9_SCHMA Glutamate-cysteine ligase OS=Schistosoma mansoni GN=Smp_013860 PE=4 SV=1	8	50.442	0.621956	0.20624	0.407753	1.32662	FALSE	17.0818891426049	18.570009130585	18.2475714954974	18.1099287936585	15.9849740601192	18.5813074507291
G4LVI6	tr|G4LVI6|G4LVI6_SCHMA Uncharacterized protein OS=Schistosoma mansoni GN=Smp_013970 PE=4 SV=1	2	33.305	0.188872	0.723832	0.281262	1.21526	FALSE	19.0062282645452	18.9653172055755	18.9084813403669	18.5807650416065	18.8523909806735	18.6030854239404
G4LVI7	tr|G4LVI7|G4LVI7_SCHMA Uveal autoantigen with coiled-coil domains and ankyrin repeats protein, putative OS=Schistosoma mansoni GN=Smp_129710 PE=4 SV=1	25	169.11	0.572148	0.242491	-0.117604	1.08493	FALSE	19.0273706927609	18.8668952781456	19.1129430794237	18.9545114792704	19.2440171903256	19.161491428063
G4LVI8	tr|G4LVI8|G4LVI8_SCHMA Adenylyl cyclase-associated protein OS=Schistosoma mansoni GN=Smp_014010 PE=3 SV=1	17	52.697	0.0205318	1.68757	-0.91578	1.88659	FALSE	20.3759316803659	21.0290020400686	21.2602137532102	21.9652421316685	21.6618355978829	21.7854086376964
G4LVJ1	tr|G4LVJ1|G4LVJ1_SCHMA Fuse-binding protein-interacting repressor siahbp1, putative OS=Schistosoma mansoni GN=Smp_129720 PE=4 SV=1	7	56.86	0.624846	0.204227	0.229824	1.17269	FALSE	18.7293888038753	19.1110755694603	19.464631967242	19.0608578529043	19.5302138839252	18.0245534643224
G4LVJ6	tr|G4LVJ6|G4LVJ6_SCHMA DEAD box ATP-dependent RNA helicase, putative OS=Schistosoma mansoni GN=Smp_211330 PE=3 SV=1	20	51.728	0.513082	0.289813	-0.41749	1.3356	FALSE	20.3887169979249	20.9310395298441	21.7483883140412	21.2352764186901	20.5805720991348	22.5047663469509
G4LVJ7	tr|G4LVJ7|G4LVJ7_SCHMA Uncharacterized protein OS=Schistosoma mansoni GN=Smp_210190 PE=4 SV=1	2	8.649	0.0342761	1.46501	0.707719	1.63322	FALSE	22.0418087273725	21.9657858986606	21.6921437264209	21.2883748356121	21.4832194147586	20.8049860787251
G4LVJ8	tr|G4LVJ8|G4LVJ8_SCHMA Uncharacterized protein OS=Schistosoma mansoni GN=Smp_210180 PE=4 SV=1	2	17.256	0.206593	0.684884	1.7583	3.38298	FALSE	17.0128117611006	17.2756932669055	18.1252312650565	15.514402720586	13.3388459562242	18.2855990632394
G4LVK0	tr|G4LVK0|G4LVK0_SCHMA AMP deaminase, putative OS=Schistosoma mansoni GN=Smp_004120 PE=4 SV=1	5	69.341	0.0151151	1.82059	2.08447	4.24119	FALSE	15.3914680785717	15.7488205718087	14.0126041620904	12.9249767195663	13.788398025017	12.1861107741096
G4LVL0	tr|G4LVL0|G4LVL0_SCHMA Uncharacterized protein OS=Schistosoma mansoni GN=Smp_002380 PE=4 SV=1	7	30.846	0.811427	0.0907503	-0.0606545	1.04294	FALSE	20.102792052193	19.7993238241802	19.736747509352	19.9535315220558	20.2296787674936	19.6376166873758
G4LVL7;G4LVL8;G4LVL9	tr|G4LVL7|G4LVL7_SCHMA Ribosome-binding protein 1 (Ribosome receptor protein) (MRRp), putative OS=Schistosoma mansoni GN=Smp_171540.3 PE=4 SV=1;tr|G4LVL8|G4LVL8_SCHMA Ribosome-binding protein 1 (Ribosome receptor protein) (MRRp), putative OS=Schistosoma ma	28	86.734	0.334445	0.475675	0.25641	1.1945	FALSE	21.0497678597048	20.770251520619	20.6011086502673	20.5030925730821	20.8472917140705	20.3015122567107
G4LVM1	tr|G4LVM1|G4LVM1_SCHMA Uncharacterized protein OS=Schistosoma mansoni GN=Smp_090370 PE=4 SV=1	11	31.793	0.00415206	2.38174	1.47576	2.78131	TRUE	21.9110521095089	21.4741450226636	21.3411801553013	20.3392289883362	20.4136261748169	19.5462307655757
G4LVM3	tr|G4LVM3|G4LVM3_SCHMA Ribosomal protein L19 OS=Schistosoma mansoni GN=Smp_171570 PE=3 SV=1	14	99.843	0.301951	0.520064	1.85351	3.61377	FALSE	20.1301108290616	19.8469304605982	19.8429722060199	17.4493198735773	15.0705015926243	21.7396767623423
G4LVM8	tr|G4LVM8|G4LVM8_SCHMA Host cell factor (DHcf) OS=Schistosoma mansoni GN=Smp_090450 PE=4 SV=1	20	133.82	0.00176798	2.75252	-1.02112	2.02949	TRUE	18.8862488380593	18.7919879154564	18.6864673145759	19.8695840530632	19.8741053990875	19.6843750599517
G4LVM9	tr|G4LVM9|G4LVM9_SCHMA Uncharacterized protein OS=Schistosoma mansoni GN=Smp_122840 PE=4 SV=1	12	48.944	0.0746038	1.12724	0.735056	1.66446	FALSE	21.3900086114008	21.1926586301633	20.3016900939393	20.3902018306833	20.2449327130022	20.0440561856795
G4LVN0	tr|G4LVN0|G4LVN0_SCHMA Uncharacterized protein OS=Schistosoma mansoni GN=Smp_122830 PE=4 SV=1	9	125.71	0.397529	0.400632	0.259875	1.19737	FALSE	19.4043609658624	19.2330362188577	18.6118930610292	18.8744173546713	19.0104674593651	18.5847811462845
G4LVN1	tr|G4LVN1|G4LVN1_SCHMA Uncharacterized protein OS=Schistosoma mansoni GN=Smp_122820 PE=4 SV=1	5	38.137	0.000403783	3.39385	-5.09006	34.0613	TRUE	13.2980158167032	15.3558588772468	13.7208770455038	19.3911261414726	20.0073471975413	18.2464673493138
G4LVP0;G4LVN9	tr|G4LVP0|G4LVP0_SCHMA Uridine cytidine kinase I, putative OS=Schistosoma mansoni GN=Smp_062260.1 PE=4 SV=1;tr|G4LVN9|G4LVN9_SCHMA Uridine cytidine kinase I, putative OS=Schistosoma mansoni GN=Smp_062260.2 PE=4 SV=1	8	27.768	0.00183973	2.73525	1.60572	3.04347	TRUE	20.3151017555595	19.6050881014774	20.4362273639343	18.2883086857673	18.7283969939625	18.5225544963928
G4LVR3	tr|G4LVR3|G4LVR3_SCHMA Ndr family, putative OS=Schistosoma mansoni GN=Smp_000320 PE=4 SV=1	3	24.764	0.0840462	1.07548	-2.54175	5.82294	FALSE	13.2980158167032	18.0237662426615	16.8354384721512	18.7802602707621	18.0129871051873	18.989215220337
G4LVS4	tr|G4LVS4|G4LVS4_SCHMA Saposin containing protein OS=Schistosoma mansoni GN=Smp_000260 PE=4 SV=1	14	104.72	0.73749	0.132244	0.222893	1.16707	FALSE	20.8878050301118	20.412893936194	19.2218298731326	20.9878474464163	19.1752356644381	19.6907671618613
G4LVS7;G4LVS6	tr|G4LVS7|G4LVS7_SCHMA Fusion OS=Schistosoma mansoni GN=Smp_000240.2 PE=4 SV=1;tr|G4LVS6|G4LVS6_SCHMA RNA binding protein, putative OS=Schistosoma mansoni GN=Smp_000240.1 PE=4 SV=1	6	53.295	0.0781578	1.10703	0.766774	1.70146	FALSE	19.8567443220722	20.6372207992522	20.7016266679133	19.1869420569479	19.6133489529197	20.0949795961282
G4LVT4	tr|G4LVT4|G4LVT4_SCHMA Oxidoreductase, short chain dehydrogenase/reductase family, putative OS=Schistosoma mansoni GN=Smp_000190 PE=3 SV=1	5	38.187	0.557803	0.253519	-0.561919	1.47623	FALSE	15.4308682253094	17.9343611995896	17.7824935445201	17.8180039105946	16.3228307681235	18.6926445395802
G4LVT8	tr|G4LVT8|G4LVT8_SCHMA Uncharacterized protein OS=Schistosoma mansoni GN=Smp_122170 PE=4 SV=1	3	33.698	2.89169e-06	5.53885	-5.39437	42.0598	TRUE	13.2980158167032	13.5125371649315	13.7208770455038	19.1895831388929	19.1655982177609	18.3593569945082
G4LVU8	tr|G4LVU8|G4LVU8_SCHMA Filamin OS=Schistosoma mansoni GN=Smp_000100 PE=4 SV=1	31	251.42	0.962552	0.016576	0.0146112	1.01018	FALSE	18.8480851532899	19.2397247057978	18.6656074451123	19.2122141133925	18.4362042889688	19.0611653680297
G4LVU9	tr|G4LVU9|G4LVU9_SCHMA F-actin capping protein alpha, putative OS=Schistosoma mansoni GN=Smp_118830 PE=3 SV=1	10	33.659	0.322925	0.490899	-0.262726	1.19974	FALSE	19.6772497543116	19.8944726241498	20.3490872371559	20.2163225729416	20.3402231763877	20.1524424992117
G4LVV4;D6BNU5	tr|G4LVV4|G4LVV4_SCHMA PwLAP aminopeptidase (M17 family) OS=Schistosoma mansoni GN=Smp_083870 PE=4 SV=1;tr|D6BNU5|D6BNU5_SCHMA Leucine aminopeptidase 2 OS=Schistosoma mansoni PE=2 SV=1	25	59.706	0.286119	0.543453	0.21302	1.15911	FALSE	23.0897404264567	23.067328211046	23.1148639720086	22.946710750447	22.748926970219	22.93723524555
G4LVV8;G4LVV9	tr|G4LVV8|G4LVV8_SCHMA Uncharacterized protein OS=Schistosoma mansoni GN=Smp_167680.2 PE=4 SV=1;tr|G4LVV9|G4LVV9_SCHMA Uncharacterized protein OS=Schistosoma mansoni GN=Smp_167680.1 PE=4 SV=1	9	98.007	0.0349129	1.45701	-1.416	2.66844	FALSE	15.8993273585877	16.5854733910823	16.5728081128286	17.3412390908934	17.1263129894945	18.8380521337857
G4LVW0	tr|G4LVW0|G4LVW0_SCHMA Ubiquitin-protein ligase,putative OS=Schistosoma mansoni GN=Smp_167690 PE=4 SV=1	28	393.56	0.717101	0.144419	-0.29482	1.22673	FALSE	16.0357871923452	16.7875991360074	16.7975098831141	16.8058556029493	15.3408453016951	18.3586564587242
G4LVX7	tr|G4LVX7|G4LVX7_SCHMA Vacuolar protein sorting (Vps33), putative OS=Schistosoma mansoni GN=Smp_069670 PE=3 SV=1	3	73.425	3.0484e-05	4.51593	-2.71279	6.55587	TRUE	13.2980158167032	13.5125371649315	13.7208770455038	16.4687135976734	16.2132576790057	15.9878227903956
G4LVX9;G4LVY0	tr|G4LVX9|G4LVX9_SCHMA Uncharacterized protein OS=Schistosoma mansoni GN=Smp_160000.2 PE=4 SV=1;tr|G4LVY0|G4LVY0_SCHMA Uncharacterized protein OS=Schistosoma mansoni GN=Smp_160000.1 PE=4 SV=1	7	202.13	0.60749	0.216461	-0.207153	1.15441	FALSE	15.082667933304	14.5169413977759	15.4569049206559	14.7869897656982	15.081419336929	15.8095642331186
G4LVY7	tr|G4LVY7|G4LVY7_SCHMA Uncharacterized protein Smp_210610 OS=Schistosoma mansoni GN=Smp_210610 PE=3 SV=1	10	60.138	0.029357	1.53229	-0.804534	1.74658	FALSE	19.3023064635572	19.340088463233	19.6579446175491	20.29324504521	20.6207554215544	19.79994187296
G4LVZ0	tr|G4LVZ0|G4LVZ0_SCHMA ADP-ribosylation factor-like 3, arl3 OS=Schistosoma mansoni GN=Smp_159930 PE=3 SV=1	7	26.554	1.60997e-05	4.79318	-7.66898	203.514	TRUE	13.2980158167032	15.4379579814674	13.7208770455038	21.7260854155974	22.1013348578856	21.636382933055
G4LVZ1	tr|G4LVZ1|G4LVZ1_SCHMA Cadherin, putative OS=Schistosoma mansoni GN=Smp_159920 PE=4 SV=1	17	169.16	6.30424e-07	6.20037	12.3092	5074.85	TRUE	25.1075715308292	24.7911947805915	25.1001093762546	12.7379845870018	11.6425746113235	13.6908642669623
G4LVZ3	tr|G4LVZ3|G4LVZ3_SCHMA Lamin, putative OS=Schistosoma mansoni GN=Smp_159900.1 PE=4 SV=1	52	744.47	0.822677	0.0847706	0.0463999	1.03268	FALSE	20.5718547446225	20.2738951332905	20.3868502558555	20.3771989118212	20.4902973292705	20.2259040639496
G4LVZ9;G4LVZ8	tr|G4LVZ9|G4LVZ9_SCHMA Xpa-binding protein 1 (Mbdin), putative OS=Schistosoma mansoni GN=Smp_072790.1 PE=4 SV=1;tr|G4LVZ8|G4LVZ8_SCHMA Xpa-binding protein 1 (Mbdin), putative OS=Schistosoma mansoni GN=Smp_072790.2 PE=4 SV=1	4	42.02	0.00199037	2.70107	2.28853	4.88558	TRUE	19.6381016927906	19.3351548757504	19.6616596571837	17.8658209798603	17.5472481017478	16.3562603916319
G4LW08	tr|G4LW08|G4LW08_SCHMA Actin, putative OS=Schistosoma mansoni GN=Smp_072870 PE=3 SV=1	8	42.515	0.178525	0.7483	-0.269207	1.20515	FALSE	21.2316766296509	21.2270647530122	21.2267941700749	21.4904256585916	21.4340510438965	21.5686794299718
G4LW12;G4LW11	tr|G4LW12|G4LW12_SCHMA Hsp90 co-chaperone (Tebp), putative OS=Schistosoma mansoni GN=Smp_072900.1 PE=4 SV=1;tr|G4LW11|G4LW11_SCHMA Hsp90 co-chaperone (Tebp), putative OS=Schistosoma mansoni GN=Smp_072900.2 PE=4 SV=1	4	19.778	0.7809	0.107404	0.0755669	1.05378	FALSE	25.5701530672005	25.8084103194517	25.52721716142	25.6295839137825	25.8924451946868	25.1570506528888
G4LW19	tr|G4LW19|G4LW19_SCHMA Cytoplasmic polyadenylation element binding protein (Cpeb), putative OS=Schistosoma mansoni GN=Smp_137460 PE=4 SV=1	7	44.885	1.2173e-07	6.9146	6.87736	117.569	TRUE	20.1503839678942	20.2757590098042	20.5190122385983	13.2833653882194	13.3388459562242	13.6908642669623
G4LW21	tr|G4LW21|G4LW21_SCHMA Ubiquitin, putative OS=Schistosoma mansoni GN=Smp_120630 PE=4 SV=1	2	14.723	0.537336	0.269754	-0.258192	1.19598	FALSE	18.4276796413044	17.9958357808201	17.6012007734461	18.1801309651585	17.7047408852361	18.9144213707782
G4LW34	tr|G4LW34|G4LW34_SCHMA Tubulin beta chain,putative OS=Schistosoma mansoni GN=Smp_030730 PE=3 SV=1	3	46.066	0.350678	0.455092	-0.200843	1.14937	FALSE	24.5951480715503	24.3685037087692	24.2154612264184	24.6576806598057	24.5879014797357	24.5360605665789
G4LW35	tr|G4LW35|G4LW35_SCHMA Histone deacetylase OS=Schistosoma mansoni GN=Smp_138770 PE=4 SV=1	10	128	0.0248069	1.60543	-2.03327	4.09333	FALSE	14.0341473173668	15.8227011636453	15.7457968419157	17.8080258681151	17.7053011551619	16.1891401444939
G4LW36	tr|G4LW36|G4LW36_SCHMA Serine/threonine-protein phosphatase OS=Schistosoma mansoni GN=Smp_030710 PE=3 SV=1	4	35.082	0.0114915	1.93962	-1.5773	2.98412	FALSE	15.2121792598437	16.0720313002712	16.8251426144632	17.423591423644	17.752010446095	17.6656643811116
G4LW37	tr|G4LW37|G4LW37_SCHMA Uncharacterized protein OS=Schistosoma mansoni GN=Smp_138760 PE=4 SV=1	5	29.339	0.235875	0.627318	-0.387361	1.308	FALSE	19.4151927199389	19.9504577277467	19.3948969265577	20.1639259748597	20.2195416939653	19.5391634410665
G4LW38	tr|G4LW38|G4LW38_SCHMA Elongation factor 1-beta, putative OS=Schistosoma mansoni GN=Smp_030690 PE=3 SV=1	15	23.958	0.012156	1.91521	0.946983	1.92784	FALSE	25.5859875598211	25.3301753431223	25.0534248521888	24.5296635611853	24.5855853278913	24.0133908667144
G4LW49	tr|G4LW49|G4LW49_SCHMA Tetraspanin OS=Schistosoma mansoni GN=Smp_176870 PE=3 SV=1	1	39.23	8.2476e-07	6.08367	-4.54251	23.304	TRUE	13.2980158167032	13.5125371649315	13.7208770455038	18.1081685642974	17.9536266229523	18.0971511168347
G4LW62;G9HW09	tr|G4LW62|G4LW62_SCHMA Uncharacterized protein OS=Schistosoma mansoni GN=Smp_131810 PE=4 SV=1;tr|G9HW09|G9HW09_SCHMA Protein O-fucosyltransferase B OS=Schistosoma mansoni GN=POFucTB PE=2 SV=1	5	63.106	0.00143373	2.84353	-3.74167	13.3769	TRUE	13.2980158167032	13.5125371649315	15.0681515487796	16.6706976700454	18.2829162027652	18.1500996814847
G4LW63	tr|G4LW63|G4LW63_SCHMA Protein kinase OS=Schistosoma mansoni GN=Smp_131800 PE=4 SV=1	4	68.84	0.803081	0.0952407	0.115484	1.08334	FALSE	17.6026077249692	18.1590285092568	18.134426944467	18.6989155161855	17.7050210473966	17.1456733521069
G4LW67	tr|G4LW67|G4LW67_SCHMA DEAD box ATP-dependent RNA helicase, putative OS=Schistosoma mansoni GN=Smp_131770 PE=4 SV=1	21	92.644	0.682801	0.165706	0.155136	1.11353	FALSE	19.3286829074315	19.5018938328265	19.8264986346896	19.4749172439645	18.7534333226156	19.963317729876
G4LW68	tr|G4LW68|G4LW68_SCHMA Uncharacterized protein OS=Schistosoma mansoni GN=Smp_017450 PE=4 SV=1	5	38.214	0.0287763	1.54097	1.21313	2.3184	FALSE	23.6016181068372	23.0610002084934	22.8876678870726	22.0909023118319	21.215982966674	22.6040216629847
G4LW82	tr|G4LW82|G4LW82_SCHMA Uncharacterized protein OS=Schistosoma mansoni GN=Smp_163030 PE=4 SV=1	6	57.641	0.646097	0.189702	-0.209141	1.156	FALSE	17.0358023676665	16.8137941244214	17.8290967382785	18.1330605287767	17.2557782911137	16.9172786650759
G4LW83	tr|G4LW83|G4LW83_SCHMA Uncharacterized protein OS=Schistosoma mansoni GN=Smp_163040 PE=4 SV=1	29	282.11	0.485421	0.313882	-1.09319	2.13346	FALSE	13.2980158167032	14.3190404087866	17.5218618992576	16.2646317223169	13.9981800719292	18.1556891805361
G4LW91	tr|G4LW91|G4LW91_SCHMA Thimet oligopeptidase (M03 family) OS=Schistosoma mansoni GN=Smp_029500 PE=3 SV=1	44	77.687	0.360891	0.442625	-0.221322	1.1658	FALSE	23.2848587967556	23.2023465210143	23.1771380262185	23.5549294089755	23.6579742883101	23.1154048212856
G4LW92	tr|G4LW92|G4LW92_SCHMA Uncharacterized protein OS=Schistosoma mansoni GN=Smp_138160 PE=4 SV=1	4	33.221	0.00202138	2.69435	1.724	3.30351	TRUE	20.9824702619739	20.6205797420484	20.3868502558555	18.3966596046244	19.3295649098368	19.0916810435312
G4LW94	tr|G4LW94|G4LW94_SCHMA Thimet oligopeptidase (M03 family) OS=Schistosoma mansoni GN=Smp_029470 PE=3 SV=1	1	78.268	0.157284	0.803315	-0.910962	1.8803	FALSE	12.8218036934078	14.3184278138697	12.7176841598099	14.9513858032834	13.7682692990779	13.8711470326104
G4LWA6	tr|G4LWA6|G4LWA6_SCHMA Dendritic cell protein, putative OS=Schistosoma mansoni GN=Smp_029410 PE=4 SV=1	7	28.277	0.00615147	2.21102	0.950816	1.93297	FALSE	22.7956481401032	22.5863129508474	22.4235522998524	21.6241603877942	21.9024238488329	21.4264798122676
G4LWA8	tr|G4LWA8|G4LWA8_SCHMA ATP synthase subunit beta vacuolar,putative OS=Schistosoma mansoni GN=Smp_029390 PE=3 SV=1	9	54.23	0.0283194	1.54792	-0.733485	1.66265	FALSE	19.6836804552837	19.9991842741381	19.9257978848317	20.7088592764736	20.882861452169	20.2173963522662
G4LWA9	tr|G4LWA9|G4LWA9_SCHMA Uncharacterized protein OS=Schistosoma mansoni GN=Smp_029370 PE=4 SV=1	4	35.766	0.619521	0.207944	-0.168998	1.12428	FALSE	17.4259437548709	17.8966117463341	17.8620687278633	18.4289119772837	17.4324868717211	17.8302196545156
G4LWB9;G4LWC0	tr|G4LWB9|G4LWB9_SCHMA Arginine/serine-rich splicing factor, putative OS=Schistosoma mansoni GN=Smp_098890.1 PE=4 SV=1;tr|G4LWC0|G4LWC0_SCHMA Arginine/serine-rich splicing factor, putative OS=Schistosoma mansoni GN=Smp_098890.2 PE=4 SV=1	3	17.553	0.0167669	1.77555	0.7533	1.68564	FALSE	24.2578928785023	23.9197247644198	23.803898631434	23.462043381198	23.1290201426357	23.1305522109471
G4LWC4;G4LWC5	tr|G4LWC4|G4LWC4_SCHMA Mps one binder kinase activator-like 3 (Mob1 homolog 3) (Mob3) OS=Schistosoma mansoni GN=Smp_105710.2 PE=4 SV=1;tr|G4LWC5|G4LWC5_SCHMA Mps one binder kinase activator-like 3 (Mob1 homolog 3) (Mob3) OS=Schistosoma mansoni GN=Smp_10571	4	21.938	0.100579	0.997494	-0.418968	1.33697	FALSE	19.4497164617932	19.6624817536767	19.3103936513546	20.078332216113	19.9141109489192	19.6870515669457
G4LWC6	tr|G4LWC6|G4LWC6_SCHMA U520, putative OS=Schistosoma mansoni GN=Smp_105700 PE=4 SV=1	60	250.71	0.523737	0.280887	-0.285968	1.21923	FALSE	18.6764469392941	19.0631761117258	20.1060131040609	19.5313152070653	19.2825642715608	19.8896606881507
G4LWC8;G4LWC9	tr|G4LWC8|G4LWC8_SCHMA Dolichyl-diphosphooligosaccharide--protein glycosyltransferase subunit 1 OS=Schistosoma mansoni GN=Smp_105680.1 PE=3 SV=1;tr|G4LWC9|G4LWC9_SCHMA Dolichyl-diphosphooligosaccharide--protein glycosyltransferase subunit 1 OS=Schistosoma	19	66.262	0.14397	0.841727	-0.804229	1.74621	FALSE	19.9663782415751	21.1432486602896	21.7531635637243	21.7018611498278	21.9418480056326	21.6317695855928
G4LWD1	tr|G4LWD1|G4LWD1_SCHMA Uncharacterized protein OS=Schistosoma mansoni GN=Smp_181220 PE=4 SV=1	6	19.208	0.00832135	2.07981	0.944066	1.92394	FALSE	24.2103635357765	23.7299317038916	23.5423343123829	22.8568720231328	22.9319522616794	22.8616066921961
G4LWD7	tr|G4LWD7|G4LWD7_SCHMA Ubiquitin-activating enzyme E1C, putative OS=Schistosoma mansoni GN=Smp_211070 PE=4 SV=1	8	48.823	0.0148707	1.82767	-1.20982	2.31309	FALSE	16.8332136678948	17.74922467392	17.7314757158727	18.6982186221645	18.257211859223	18.9879511463981
G4LWE0	tr|G4LWE0|G4LWE0_SCHMA RWD domain-containing protein, putative OS=Schistosoma mansoni GN=Smp_022150 PE=4 SV=1	17	67.264	0.0029939	2.52376	-1.36056	2.56785	TRUE	18.0399846663436	17.9293549270737	17.3386268952891	18.9619748048666	19.0137223517105	19.4139604069652
G4LWE6	tr|G4LWE6|G4LWE6_SCHMA Sortilin OS=Schistosoma mansoni GN=Smp_179360 PE=4 SV=1	5	130.83	0.404319	0.393276	-0.189641	1.14048	FALSE	16.2418981007723	16.2533076479931	16.5305949467527	16.3164121090983	16.6805835666414	16.5977273335611
G4LWE7	tr|G4LWE7|G4LWE7_SCHMA Uncharacterized protein OS=Schistosoma mansoni GN=Smp_165870 PE=4 SV=1	6	28.228	0.00920645	2.03591	1.12318	2.17827	TRUE	21.4589698152408	20.7956146825167	21.18699211817	19.8304824113775	19.8018953200002	20.4396507694853
G4LWF1	tr|G4LWF1|G4LWF1_SCHMA tRNA (guanine(26)-N(2))-dimethyltransferase OS=Schistosoma mansoni GN=Smp_165900.1 PE=3 SV=1	2	47.189	0.404295	0.393302	0.873685	1.83234	FALSE	15.8914324256163	16.2213142599972	16.6508551273189	15.5760690533622	13.3388459562242	17.2276315744606
G4LWG5;C5J9R9	tr|G4LWG5|G4LWG5_SCHMA Tyrosine-protein kinase OS=Schistosoma mansoni GN=Smp_006920 PE=3 SV=1;tr|C5J9R9|C5J9R9_SCHMA Tyrosine-protein kinase OS=Schistosoma mansoni GN=tk6 PE=2 SV=1	4	54.904	0.0327095	1.48533	-1.53359	2.89504	FALSE	15.2907357848377	16.324236989953	15.1144799980447	17.1089927688148	17.9751580378915	16.2460570489308
G4LWI2	tr|G4LWI2|G4LWI2_SCHMA Heat shock protein HSP60, putative OS=Schistosoma mansoni GN=Smp_008545 PE=3 SV=1	41	59.554	0.475734	0.322636	-0.178428	1.13165	FALSE	26.7198725155613	26.5304581176935	26.8074899516434	26.835810407605	27.1738328891082	26.5834599722326
G4LWI3	tr|G4LWI3|G4LWI3_SCHMA Aldehyde dehydrogenase,putative OS=Schistosoma mansoni GN=Smp_050390 PE=3 SV=1	28	53.762	0.0370392	1.43134	-0.734287	1.66358	FALSE	26.1797887217312	26.657040910171	26.1152823146877	27.0337497852169	26.73892511655	27.3822993521779
G4LWI9;G4LWI7;G4LWI8;G4LWI6	tr|G4LWI9|G4LWI9_SCHMA Vacuolar protein sorting-associated protein 29 OS=Schistosoma mansoni GN=Smp_050350.1 PE=3 SV=1;tr|G4LWI7|G4LWI7_SCHMA Vacuolar protein sorting-associated protein 29 OS=Schistosoma mansoni GN=Smp_050350.3 PE=3 SV=1;tr|G4LWI8|G4LWI8_S	3	16.166	0.140231	0.853157	-0.852023	1.80503	FALSE	17.9116517720662	18.2216601187188	16.4098000978781	18.4641238183958	18.2976667642677	18.3373917444114
G4LWJ8;G4LWJ9	tr|G4LWJ8|G4LWJ8_SCHMA Xtp3-transactivated protein B, putative OS=Schistosoma mansoni GN=Smp_149050.1 PE=4 SV=1;tr|G4LWJ9|G4LWJ9_SCHMA Xtp3-transactivated protein B, putative OS=Schistosoma mansoni GN=Smp_149050.2 PE=4 SV=1	2	55.913	0.0172517	1.76317	-2.60212	6.07179	FALSE	13.2980158167032	13.5125371649315	15.866505690872	16.7907117416026	16.1238214503208	17.5688939599305
G4LWK0	tr|G4LWK0|G4LWK0_SCHMA 60S ribosomal protein L31, putative OS=Schistosoma mansoni GN=Smp_050280 PE=4 SV=1	3	14.113	0.492593	0.307512	0.399157	1.31874	FALSE	22.0497208931534	21.262826863837	21.8275423748767	20.9794727242337	20.5285923448357	22.4345526270455
G4LWK2	tr|G4LWK2|G4LWK2_SCHMA Phosphorylase B kinase alpha, kpb1, putative OS=Schistosoma mansoni GN=Smp_149040 PE=4 SV=1	5	146.72	0.104459	0.981056	-1.23959	2.36131	FALSE	13.5066679374513	15.4521758341854	14.3276448108841	16.3760166553544	14.7345236807265	15.8947113724857
G4LWK3	tr|G4LWK3|G4LWK3_SCHMA Uncharacterized protein OS=Schistosoma mansoni GN=Smp_050250 PE=4 SV=1	10	47.334	0.0219699	1.65817	0.67257	1.59391	FALSE	21.641820399144	21.404851050993	21.2158560963905	20.7180353072833	20.9281886339945	20.5985928887863
G4LWK5	tr|G4LWK5|G4LWK5_SCHMA Lim domain binding protein, putative OS=Schistosoma mansoni GN=Smp_149020 PE=4 SV=1	2	157.8	0.00294812	2.53045	1.47353	2.777	TRUE	14.4440100425154	14.8840857089411	14.9721458156042	12.8499438597116	13.3388459562242	13.6908642669623
G4LWK8	tr|G4LWK8|G4LWK8_SCHMA Protein phosphatase 2C, putative OS=Schistosoma mansoni GN=Smp_149000 PE=4 SV=1	3	85.043	0.000172408	3.76344	-2.659	6.31593	TRUE	13.2980158167032	14.0506335418412	13.9827067379502	16.6429260729998	16.6223248731426	16.0430936443424
G4LWK9	tr|G4LWK9|G4LWK9_SCHMA Nucleolar protein NOP56, putative OS=Schistosoma mansoni GN=Smp_148990 PE=4 SV=1	16	73.536	0.00108828	2.96326	2.06974	4.1981	TRUE	22.3510149879865	22.1850070640711	22.4015375146592	20.2684764265824	19.6228328167088	20.8370361033737
G4LWL3	tr|G4LWL3|G4LWL3_SCHMA Uncharacterized protein OS=Schistosoma mansoni GN=Smp_050130 PE=4 SV=1	3	37.74	0.016811	1.77441	-1.63671	3.10956	FALSE	17.4267540951358	16.4000519616706	18.0667245703877	18.8538021611659	19.4297560775957	18.520102707152
G4LWL6	tr|G4LWL6|G4LWL6_SCHMA NAD dehydrogenase, putative OS=Schistosoma mansoni GN=Smp_050080 PE=4 SV=1	21	49.727	0.413752	0.38326	0.190946	1.14151	FALSE	22.1583426847085	22.2793429393282	22.6458377348097	22.0786669315011	22.276379754853	22.1556387698494
G4LWM1	tr|G4LWM1|G4LWM1_SCHMA FACT complex subunit SSRP1 OS=Schistosoma mansoni GN=Smp_148930 PE=3 SV=1	19	72.069	0.388949	0.410108	-0.200112	1.14879	FALSE	20.5326025318728	20.7704070588694	20.915184695775	20.9922704775807	21.089781749553	20.7364784405404
G4LWM2	tr|G4LWM2|G4LWM2_SCHMA Uncharacterized protein OS=Schistosoma mansoni GN=Smp_172090 PE=4 SV=1	5	34.578	0.0915678	1.03826	0.882381	1.84341	FALSE	18.2619771332588	18.3939997745487	18.7930568561467	17.6209793574899	18.3770838162171	16.8038285443449
G4LWM4	tr|G4LWM4|G4LWM4_SCHMA Casp, putative OS=Schistosoma mansoni GN=Smp_049990 PE=4 SV=1	3	81.04	0.0805453	1.09396	0.728493	1.65691	FALSE	13.2980158167032	13.3393128038129	13.5172802090714	12.4132793775793	13.3489355040662	12.2069141600104
G4LWM5;G4LWM7;G4LWM6	tr|G4LWM5|G4LWM5_SCHMA Zinc finger protein, putative OS=Schistosoma mansoni GN=Smp_049970.1 PE=4 SV=1;tr|G4LWM7|G4LWM7_SCHMA Zinc finger protein, putative OS=Schistosoma mansoni GN=Smp_049970.4 PE=4 SV=1;tr|G4LWM6|G4LWM6_SCHMA Zinc finger protein, putative	1	24.846	0.0401456	1.39636	2.73561	6.66043	FALSE	19.1693563068285	18.768009908503	18.4424880310314	16.7977924676733	17.6843538326942	13.6908642669623
G4LWN2;G4LWN3	tr|G4LWN2|G4LWN2_SCHMA Importin 9 (Imp9) (Ran-binding protein 9),putative OS=Schistosoma mansoni GN=Smp_049920.1 PE=4 SV=1;tr|G4LWN3|G4LWN3_SCHMA Importin 9 (Imp9) (Ran-binding protein 9),putative OS=Schistosoma mansoni GN=Smp_049920.3 PE=4 SV=1	5	93.286	0.228236	0.641616	0.809653	1.75279	FALSE	16.5387837724057	17.125325551197	17.1666560273593	15.4281496676061	15.5191632562762	17.4544931170795
G4LWN8	tr|G4LWN8|G4LWN8_SCHMA Nuclear pore glycoprotein P62, putative OS=Schistosoma mansoni GN=Smp_049880 PE=4 SV=1	6	54.511	0.0808464	1.09234	0.563504	1.47785	FALSE	19.3630471635966	18.7451785502067	19.379080848743	18.6069386758752	18.8138459074912	18.3760109140505
G4LWP3	tr|G4LWP3|G4LWP3_SCHMA Uncharacterized protein OS=Schistosoma mansoni GN=Smp_148800 PE=4 SV=1	7	18.461	0.177643	0.750453	0.828491	1.77583	FALSE	22.7049154099572	22.3731711349364	21.5082448946149	21.3438114431895	22.2446015054237	20.5124467046161
G4LWP4	tr|G4LWP4|G4LWP4_SCHMA Laminin beta chain-related OS=Schistosoma mansoni GN=Smp_148790 PE=4 SV=1	29	196.58	0.00375779	2.42507	-1.57615	2.98173	TRUE	17.7759663897552	17.8694532487464	18.2863600148333	19.9959713225509	19.7078546293337	18.9564083774887
G4LWP8	tr|G4LWP8|G4LWP8_SCHMA Ribose-5-phosphate isomerase, putative OS=Schistosoma mansoni GN=Smp_148770 PE=4 SV=1	7	28.232	1.27282e-05	4.89523	4.54383	23.3254	TRUE	21.18634030657	21.1877756218981	20.6531318222624	16.349885623278	17.0146832628944	16.0311850709726
G4LWQ0	tr|G4LWQ0|G4LWQ0_SCHMA Uncharacterized protein OS=Schistosoma mansoni GN=Smp_198230 PE=4 SV=1	4	228.22	0.00210125	2.67752	-2.21288	4.63601	TRUE	13.2980158167032	14.7874515884892	13.7208770455038	15.9304296082838	16.1772614712963	16.3373028528614
G4LWQ1	tr|G4LWQ1|G4LWQ1_SCHMA Hypoxanthine-guanine phosphoribosyltransferase,putative OS=Schistosoma mansoni GN=Smp_168500 PE=4 SV=1	5	26.018	0.590236	0.228975	0.432394	1.34947	FALSE	20.2832897319693	19.1886604394916	17.5218618992576	19.3074967140919	18.0653171297871	18.3238169803162
G4LWQ2;P09383	tr|G4LWQ2|G4LWQ2_SCHMA Hypoxanthine phosphoribosyltransferase OS=Schistosoma mansoni GN=Smp_103560 PE=3 SV=1;sp|P09383|HPRT_SCHMA Hypoxanthine-guanine phosphoribosyltransferase OS=Schistosoma mansoni GN=HGPRT PE=1 SV=1	11	28.037	0.0345652	1.46136	-0.550705	1.4648	FALSE	21.4739580755812	21.4684040877466	21.223132410734	21.9597751629645	22.0815784838369	21.7762572848718
G4LWQ3	tr|G4LWQ3|G4LWQ3_SCHMA Syntaxin, putative OS=Schistosoma mansoni GN=Smp_179930 PE=3 SV=1	2	31.913	0.676261	0.169885	-0.352725	1.27697	FALSE	16.763594256436	15.8207799714634	13.7208770455038	15.2326197755834	16.0227072717452	16.108098902346
G4LWR1	tr|G4LWR1|G4LWR1_SCHMA Uncharacterized protein OS=Schistosoma mansoni GN=Smp_157250 PE=4 SV=1	9	54.565	0.00968716	2.0138	2.50959	5.69458	TRUE	16.6089456571163	16.9600628686284	16.050799037843	13.2833653882194	13.3388459562242	15.4688246066179
G4LWR6;C0MP97	tr|G4LWR6|G4LWR6_SCHMA Diaphanous, putative OS=Schistosoma mansoni GN=Smp_068720 PE=4 SV=1;tr|C0MP97|C0MP97_SCHMA Formin-homology protein SmDia OS=Schistosoma mansoni GN=SmDia PE=2 SV=1	13	119.42	0.324463	0.488835	0.313562	1.24277	FALSE	18.3249930293282	17.8815996524748	17.6425181482375	17.3756431098362	17.5075656453282	18.0252157911739
G4LWS5	tr|G4LWS5|G4LWS5_SCHMA Uncharacterized protein OS=Schistosoma mansoni GN=Smp_113740 PE=4 SV=1	3	13.483	0.0044959	2.34718	1.58302	2.99597	TRUE	20.7156714190996	19.8543157854074	20.5751971903218	18.8929160840193	19.1821953519827	18.3210027241353
G4LWS6	tr|G4LWS6|G4LWS6_SCHMA Uncharacterized protein OS=Schistosoma mansoni GN=Smp_039080 PE=4 SV=1	1	39.432	0.167933	0.774865	-1.04983	2.07029	FALSE	16.0584622161695	16.0180136539508	13.7208770455038	16.3342074648286	16.3156018592044	16.2970401008144
G4LWT1	tr|G4LWT1|G4LWT1_SCHMA ATP synthase delta chain, putative OS=Schistosoma mansoni GN=Smp_039000 PE=3 SV=1	10	22.778	0.408886	0.388398	0.183533	1.13566	FALSE	22.4969794623248	22.6796183662727	22.5245177280891	22.6132765386444	22.1947560143454	22.3424827467981
G4LWT4	tr|G4LWT4|G4LWT4_SCHMA Cell division control protein, putative OS=Schistosoma mansoni GN=Smp_129320 PE=4 SV=1	11	109.48	0.05733	1.24162	0.715206	1.64172	FALSE	19.0341852985181	18.6485702264073	18.1296448426335	17.6447356787142	18.1333560118001	17.8886904829756
G4LWU9	tr|G4LWU9|G4LWU9_SCHMA Uncharacterized protein OS=Schistosoma mansoni GN=Smp_144680 PE=4 SV=1	8	45.59	0.000107801	3.96738	-4.9899	31.7768	TRUE	15.5701163935967	13.5125371649315	14.2276000032537	19.4985252719477	19.2661632631114	19.5152651733692
G4LWV6	tr|G4LWV6|G4LWV6_SCHMA Uncharacterized protein OS=Schistosoma mansoni GN=Smp_041370 PE=4 SV=1	2	85.224	0.000195673	3.70847	-3.12191	8.70541	TRUE	13.2980158167032	13.4339731102383	14.5279418116885	16.8074259085559	17.0405553651961	16.7776882862374
G4LWW0	tr|G4LWW0|G4LWW0_SCHMA 14-3-3 protein, putative OS=Schistosoma mansoni GN=Smp_041430.1 PE=3 SV=1	9	27.963	0.0889508	1.05085	-0.465248	1.38055	FALSE	20.6738651738062	20.4423809886529	20.293874440523	20.9456363514531	21.1720725519215	20.688155633288
G4LWW1	tr|G4LWW1|G4LWW1_SCHMA Aspartyl-tRNA synthetase, putative OS=Schistosoma mansoni GN=Smp_041450 PE=4 SV=1	30	61.244	0.746552	0.12694	0.0776949	1.05533	FALSE	22.7225523071144	22.8333450715941	23.1720887286793	22.5924653591557	22.9332980419537	22.9691380021567
G4LWW2	tr|G4LWW2|G4LWW2_SCHMA Tetraspanin, putative OS=Schistosoma mansoni GN=Smp_041460 PE=3 SV=1	5	30.43	0.0633203	1.19846	-0.828498	1.77584	FALSE	20.9061835594267	20.8319112863854	20.998331118284	21.8247356348675	22.3491853527223	21.0479995258733
G4LWW4	tr|G4LWW4|G4LWW4_SCHMA Uncharacterized protein OS=Schistosoma mansoni GN=Smp_144770 PE=4 SV=1	3	104.38	0.0154335	1.81154	1.49671	2.82198	FALSE	14.1458986946753	14.8462901892673	15.7776433789409	13.2833653882194	13.3388459562242	13.6575041803178
G4LWW5;G4LWW6;G4LWW7	tr|G4LWW5|G4LWW5_SCHMA Rna recognition motif (Rrm) domain containing protein, putative OS=Schistosoma mansoni GN=Smp_041480.3 PE=4 SV=1;tr|G4LWW6|G4LWW6_SCHMA Rna recognition motif (Rrm) domain containing protein, putative OS=Schistosoma mansoni GN=Smp_041	6	63.1	0.0161562	1.79166	0.644674	1.56339	FALSE	20.9007778648095	20.6700212752763	20.7481283361981	20.2760851983828	20.0513927696766	20.057428791354
G4LWW9	tr|G4LWW9|G4LWW9_SCHMA Uncharacterized protein OS=Schistosoma mansoni GN=Smp_041500 PE=4 SV=1	1	16.199	0.441769	0.354805	1.08997	2.1287	FALSE	17.2285764293962	18.0736254274516	18.2732955284564	18.2453041092241	18.369415514405	13.6908642669623
G4LWX2	tr|G4LWX2|G4LWX2_SCHMA Uncharacterized protein OS=Schistosoma mansoni GN=Smp_144790 PE=4 SV=1	1	11.254	0.0041797	2.37885	-0.970093	1.95897	FALSE	19.304071575361	19.151500559004	19.3840955655896	20.4828584918913	20.2374469574396	20.02964188742
G4LWX4	tr|G4LWX4|G4LWX4_SCHMA Ormdl proteins, putative OS=Schistosoma mansoni GN=Smp_210370 PE=4 SV=1	24	80.038	0.0723662	1.14046	-0.940219	1.91882	FALSE	19.7572669385483	20.2554561211959	21.3414559129437	21.283654051967	21.4608420306932	21.4303395658211
G4LWX6	tr|G4LWX6|G4LWX6_SCHMA Uncharacterized protein OS=Schistosoma mansoni GN=Smp_041550 PE=4 SV=1	2	16.693	0.456055	0.340982	-1.08867	2.12678	FALSE	13.2980158167032	18.3552866079438	17.8195473967783	17.5108806496265	17.1748564569077	18.0531233381736
G4LWX9	tr|G4LWX9|G4LWX9_SCHMA Splicing factor 3B subunit 3, 5 OS=Schistosoma mansoni GN=Smp_137430 PE=4 SV=1	26	118.9	0.424672	0.371946	-0.266411	1.20281	FALSE	19.6262579518792	20.0214418210716	20.6264497796099	20.3746309380938	20.5321494332395	20.1666035225595
G4LWY0;I0B503	tr|G4LWY0|G4LWY0_SCHMA S-methyl-5-thioadenosine phosphorylase OS=Schistosoma mansoni GN=Smp_028190 PE=3 SV=1;tr|I0B503|I0B503_SCHMA S-methyl-5-thioadenosine phosphorylase OS=Schistosoma mansoni PE=1 SV=1	11	32.661	0.000273249	3.56344	-1.86987	3.655	TRUE	22.142795071628	22.2644842451646	22.2586814938243	24.0681701953651	24.4372955165453	23.7701102538711
G4LWY1	tr|G4LWY1|G4LWY1_SCHMA Troponin I (TnI), putative OS=Schistosoma mansoni GN=Smp_028200 PE=4 SV=1	6	98.369	0.10512	0.978316	-1.24695	2.37339	FALSE	16.6340426174063	16.4471719212102	14.30103236987	17.1777403586105	16.9345193719523	17.01083401096
G4LWY6	tr|G4LWY6|G4LWY6_SCHMA HMG-CoA synthase OS=Schistosoma mansoni GN=Smp_198690 PE=4 SV=1	7	36.55	0.391446	0.407329	0.411798	1.33034	FALSE	18.233745247253	18.8646533273589	18.5851752953635	17.2819441368703	18.8328786740619	18.3333564801645
G4LWY7	tr|G4LWY7|G4LWY7_SCHMA DUF814 domain protein OS=Schistosoma mansoni GN=Smp_028330 PE=4 SV=1	4	24.216	0.000463895	3.33358	-2.0483	4.13618	TRUE	19.7182740676857	19.6128807366003	19.1226022949441	21.7492489690962	21.732207744288	21.1171964127631
G4LWY8	tr|G4LWY8|G4LWY8_SCHMA Brix domain containing protein, putative OS=Schistosoma mansoni GN=Smp_028340 PE=4 SV=1	6	39.214	0.299566	0.523507	1.21947	2.32862	FALSE	15.9442915477502	15.2218239175996	16.0284750697306	13.2012030176516	13.3388459562242	16.9961197459009
G4LX00	tr|G4LX00|G4LX00_SCHMA Disulfide oxidoreductase, putative OS=Schistosoma mansoni GN=Smp_137540 PE=4 SV=1	16	76.125	0.20699	0.684051	0.308689	1.23858	FALSE	21.2043423852721	21.1331844965069	21.5726742262301	20.8493812617491	21.1269142921741	21.0078398441811
G4LX03;G4LX02	tr|G4LX03|G4LX03_SCHMA Adenosylhomocysteinase OS=Schistosoma mansoni GN=Smp_028440.1 PE=3 SV=1;tr|G4LX02|G4LX02_SCHMA Adenosylhomocysteinase,putative OS=Schistosoma mansoni GN=Smp_028440.2 PE=4 SV=1	19	47.528	0.653128	0.185002	-0.104409	1.07505	FALSE	23.8948290288529	23.8214406698846	23.7959975565655	23.8820891713084	24.2470386179296	23.6963659914172
G4LX09	tr|G4LX09|G4LX09_SCHMA Helicase, putative OS=Schistosoma mansoni GN=Smp_137580 PE=4 SV=1	31	149.17	0.0713581	1.14656	-2.67772	6.39845	FALSE	13.9865782391028	16.5996886369748	17.5226403143521	18.7202558672023	17.0109490801477	20.4108663045022
G4LX20;G4LX19	tr|G4LX20|G4LX20_SCHMA Uncharacterized protein OS=Schistosoma mansoni GN=Smp_075440.3 PE=4 SV=1;tr|G4LX19|G4LX19_SCHMA Uncharacterized protein OS=Schistosoma mansoni GN=Smp_075440.1 PE=4 SV=1	3	48.414	0.0570056	1.24408	-1.05926	2.08386	FALSE	15.079196874135	15.8791093046324	14.4114821489499	16.6776841003615	15.8339934813007	16.0358814290017
G4LX38	tr|G4LX38|G4LX38_SCHMA Vesicle docking protein P115, putative OS=Schistosoma mansoni GN=Smp_168660 PE=4 SV=1	2	105.73	0.272592	0.564488	1.03751	2.05268	FALSE	13.9067810998926	14.3873542893992	15.3185296359773	15.163644727372	13.3388459562242	11.9976534408091
G4LX40;G4LX41	tr|G4LX40|G4LX40_SCHMA Cop9 complex subunit, putative OS=Schistosoma mansoni GN=Smp_085640.2 PE=4 SV=1;tr|G4LX41|G4LX41_SCHMA Cop9 complex subunit, putative OS=Schistosoma mansoni GN=Smp_085640.1 PE=4 SV=1	12	43.289	0.988771	0.00490421	0.00351526	1.00244	FALSE	21.0981670083422	21.1044157625297	20.9269927395193	21.1086650165932	21.3289628947572	20.6814018122954
G4LX43	tr|G4LX43|G4LX43_SCHMA Exosome complex exonuclease RRP43, putative OS=Schistosoma mansoni GN=Smp_045730 PE=4 SV=1	2	33.977	0.217441	0.662659	1.37692	2.59713	FALSE	17.5486445248941	17.4866952366041	17.0913968013318	16.8380264947193	17.4670911462189	13.6908642669623
G4LX53	tr|G4LX53|G4LX53_SCHMA 26S proteasome non-ATPase regulatory subunit 7 (M67 family) OS=Schistosoma mansoni GN=Smp_026630 PE=4 SV=1	11	40.243	0.041597	1.38094	0.471417	1.38647	FALSE	21.8729636074143	21.8050595283011	21.9650727430439	21.4006045885443	21.3399413284487	21.4882981257689
G4LX57	tr|G4LX57|G4LX57_SCHMA 60S ribosomal protein L38, putative OS=Schistosoma mansoni GN=Smp_058720.1 PE=3 SV=1	5	9.5872	0.00587912	2.23069	0.890058	1.85325	FALSE	23.3580491074351	23.3429777904641	23.4595502024749	22.5697686692579	22.6899952444262	22.2306377849047
G4LX58	tr|G4LX58|G4LX58_SCHMA Uncharacterized protein OS=Schistosoma mansoni GN=Smp_153730 PE=4 SV=1	1	44.925	9.56155e-05	4.01947	3.09592	8.54996	TRUE	17.016261491487	16.6915194833106	17.0110240680239	14.4013403019944	13.3388459562242	13.6908642669623
G4LX62;G4LX63	tr|G4LX62|G4LX62_SCHMA Ribosome biogenesis regulatory protein,putative OS=Schistosoma mansoni GN=Smp_058680.2 PE=4 SV=1;tr|G4LX63|G4LX63_SCHMA Ribosome biogenesis regulatory protein,putative OS=Schistosoma mansoni GN=Smp_058680.1 PE=4 SV=1	9	31.006	0.0167727	1.7754	4.17383	18.0488	FALSE	20.8761984104638	20.1943985640918	20.090609590486	17.1035142209674	13.3388459562242	18.1973585990296
G4LX66	tr|G4LX66|G4LX66_SCHMA Proteasome regulatory subunit-related OS=Schistosoma mansoni GN=Smp_058650 PE=4 SV=1	19	52.219	0.470016	0.327887	-0.173257	1.1276	FALSE	21.3433334370589	21.6483502040524	21.6194740602966	21.4692826477144	21.9587239837633	21.7029209243663
G4LX70	tr|G4LX70|G4LX70_SCHMA Protein phosphatase 1 binding protein, putative OS=Schistosoma mansoni GN=Smp_153700 PE=4 SV=1	2	78.001	0.000245653	3.60968	-1.63139	3.09812	TRUE	13.2980158167032	13.5125371649315	13.7208770455038	15.2286264775431	15.1085270501172	15.0884594375746
G4LX81	tr|G4LX81|G4LX81_SCHMA Eukaryotic translation initiation factor 3 subunit B OS=Schistosoma mansoni GN=Smp_058460 PE=3 SV=1	31	76.711	0.00198149	2.70301	1.02684	2.03756	TRUE	21.9751689583978	21.892008706176	21.8914629974098	20.8516213849287	21.0776621511702	20.7488395995368
G4LX83	tr|G4LX83|G4LX83_SCHMA Uncharacterized protein OS=Schistosoma mansoni GN=Smp_153630 PE=4 SV=1	1	11.403	0.0534635	1.27194	3.21326	9.27445	FALSE	18.7208720294992	18.3904825327915	17.7252339245048	18.1670952305738	13.3388459562242	13.6908642669623
G4LX85	tr|G4LX85|G4LX85_SCHMA Chromatin assembly factor I P60 subunit,putative OS=Schistosoma mansoni GN=Smp_153610 PE=4 SV=1	4	63.65	0.225612	0.646638	-0.311222	1.24076	FALSE	17.5987093786057	17.5051312827647	17.5895466790981	17.7359352364549	18.2307980222996	17.660320972469
G4LX86	tr|G4LX86|G4LX86_SCHMA Uncharacterized protein OS=Schistosoma mansoni GN=Smp_058410 PE=4 SV=1	3	79.141	0.567964	0.245679	0.229788	1.17266	FALSE	16.4321831953353	16.2725340794222	15.7572184033208	15.2962645628579	15.9653449373098	16.5109631594409
G4LX89	tr|G4LX89|G4LX89_SCHMA Cofilin, actophorin, putative OS=Schistosoma mansoni GN=Smp_120700.1 PE=3 SV=1	5	15.726	0.885363	0.0528789	-0.0407956	1.02868	FALSE	20.8301281367512	21.534870996505	21.297787559788	21.4967730177879	21.2787932240768	21.0096073400193
G4LX94	tr|G4LX94|G4LX94_SCHMA Uncharacterized protein OS=Schistosoma mansoni GN=Smp_083240 PE=4 SV=1	4	17.269	0.295216	0.52986	0.748855	1.68046	FALSE	19.5922746252891	20.1370497233089	18.007413857183	17.7200351910227	18.719688338149	19.050450743582
G4LX95	tr|G4LX95|G4LX95_SCHMA Uncharacterized protein OS=Schistosoma mansoni GN=Smp_167290 PE=4 SV=1	10	198.23	0.00747661	2.1263	1.7139	3.28045	TRUE	15.0719336334482	15.0744520654919	16.3159499692784	13.4063716294189	14.1544657478124	13.7598117974817
G4LX99	tr|G4LX99|G4LX99_SCHMA Succinyl-CoA synthetase beta chain, putative OS=Schistosoma mansoni GN=Smp_167330 PE=4 SV=1	8	37.517	0.100863	0.996267	-0.581137	1.49603	FALSE	19.472010674101	20.0547720391789	20.0781540229638	20.5996801854728	20.7209529712143	20.027715174306
G4LXA0;G4LXA3;G4LXA1;G4LXA4;G4LXA2	tr|G4LXA0|G4LXA0_SCHMA Uncharacterized protein OS=Schistosoma mansoni GN=Smp_083340.5 PE=4 SV=1;tr|G4LXA3|G4LXA3_SCHMA Uncharacterized protein OS=Schistosoma mansoni GN=Smp_083340.3 PE=4 SV=1;tr|G4LXA1|G4LXA1_SCHMA Uncharacterized protein OS=Schistosoma ma	5	111.86	0.00477967	2.3206	0.982211	1.97549	FALSE	19.0689335348532	18.5948486685204	18.8057834717127	17.7116243852087	17.7907361065168	18.0205731050619
G4LXB1	tr|G4LXB1|G4LXB1_SCHMA Elongation factor 1-gamma, putative OS=Schistosoma mansoni GN=Smp_083410 PE=4 SV=1	16	47.573	0.0546122	1.26271	0.562172	1.47649	FALSE	24.7133457693337	24.9947395212127	25.1395936937277	24.4964509437098	24.1054031169624	24.5593100141783
G4LXB4	tr|G4LXB4|G4LXB4_SCHMA Uncharacterized protein OS=Schistosoma mansoni GN=Smp_097620 PE=4 SV=1	2	20.836	0.0357728	1.44645	0.697809	1.62204	FALSE	18.0734128656509	18.4787975284797	18.1233080987541	17.6773305295839	17.7504504456637	17.1543106541095
G4LXB6	tr|G4LXB6|G4LXB6_SCHMA DEAD box ATP-dependent RNA helicase, putative OS=Schistosoma mansoni GN=Smp_097660 PE=4 SV=1	24	44.285	0.104099	0.982553	-0.656307	1.57604	FALSE	23.0759010236406	23.7815812643707	24.2200613316337	24.393501597725	24.5212901806674	24.1316738709455
G4LXC0	tr|G4LXC0|G4LXC0_SCHMA Uncharacterized protein OS=Schistosoma mansoni GN=Smp_097710 PE=4 SV=1	11	39.024	0.0408189	1.38914	-0.614834	1.53138	FALSE	19.2503190596494	19.1767867239558	19.4595089171499	20.0785234915579	20.0825896005989	19.5700039582681
G4LXC1	tr|G4LXC1|G4LXC1_SCHMA Pinn, putative OS=Schistosoma mansoni GN=Smp_198750 PE=4 SV=1	6	44.507	0.133651	0.874026	0.763461	1.69756	FALSE	21.0187205440323	20.0297818752448	20.5340492903429	20.2166702103025	18.9883387061599	20.0871596154337
G4LXC4	tr|G4LXC4|G4LXC4_SCHMA Cold shock domain protein A, putative OS=Schistosoma mansoni GN=Smp_097750 PE=4 SV=1	6	19.686	0.0274586	1.56132	0.593896	1.50932	FALSE	22.6149638665811	22.6213991243706	22.3426272952502	22.1051487050181	21.8182878158826	21.8738645065566
G4LXC5	tr|G4LXC5|G4LXC5_SCHMA Nuclease-related OS=Schistosoma mansoni GN=Smp_175840 PE=4 SV=1	8	42.86	0.876395	0.0573002	-0.0615479	1.04358	FALSE	19.910928010268	19.790592933292	20.9267170916426	19.9540528587582	20.5919783652245	20.2668505568082
G4LXC6	tr|G4LXC6|G4LXC6_SCHMA Nuclease-related OS=Schistosoma mansoni GN=Smp_175850 PE=4 SV=1	6	28.579	0.0546122	1.26271	0.879578	1.83984	FALSE	18.7466438959488	19.1381108477224	19.2571914533495	18.7745810575144	18.1847338263557	17.54389595418
G4LXD0;Q27277;G4LXD2	tr|G4LXD0|G4LXD0_SCHMA Y box binding protein, putative OS=Schistosoma mansoni GN=Smp_097800.2 PE=4 SV=1;tr|Q27277|Q27277_SCHMA Y box binding protein, putative OS=Schistosoma mansoni GN=Smp_097800.1 PE=2 SV=1;tr|G4LXD2|G4LXD2_SCHMA Y box binding protein, pu	5	18.522	0.00091135	3.04031	1.5698	2.96865	TRUE	25.3288435437438	24.8656528088523	24.7843177963609	23.5784507422747	23.1438371189323	23.5471117518329
G4LXD4	tr|G4LXD4|G4LXD4_SCHMA Ubiquitin thioesterase OS=Schistosoma mansoni GN=Smp_097810.1 PE=3 SV=1	4	31.024	0.239833	0.620091	0.347887	1.2727	FALSE	19.0225544422251	18.72910369868	18.8096952720787	18.6933059356309	18.7680547878826	18.0563311306047
G4LXE3;G4VBL7	tr|G4LXE3|G4LXE3_SCHMA Uncharacterized protein OS=Schistosoma mansoni GN=Smp_163540 PE=4 SV=1;tr|G4VBL7|G4VBL7_SCHMA Uncharacterized protein OS=Schistosoma mansoni GN=Smp_096920 PE=4 SV=1	4	59.628	0.104416	0.981235	-0.826275	1.7731	FALSE	15.9211797690104	16.0627748488239	15.8926339290787	16.9160480346161	15.9153251667119	17.5240391928421
G4LXE6	tr|G4LXE6|G4LXE6_SCHMA Symplekin, putative OS=Schistosoma mansoni GN=Smp_163560 PE=4 SV=1	12	220.4	0.214395	0.668784	0.996468	1.99511	FALSE	15.1419000448412	15.6590920321091	15.9756178705218	13.4626062743151	14.1925273777023	16.1320731850175
G4LXF1	tr|G4LXF1|G4LXF1_SCHMA Rab6, putative OS=Schistosoma mansoni GN=Smp_163580 PE=4 SV=1	9	23.256	0.00501762	2.2995	-0.960764	1.94634	FALSE	21.7504748967882	21.5788724810364	22.0096973242198	22.6548854600656	22.9407332379988	22.625716734084
G4LXG0	tr|G4LXG0|G4LXG0_SCHMA Uncharacterized protein OS=Schistosoma mansoni GN=Smp_076990 PE=4 SV=1	1	59.925	0.116091	0.9352	-1.37651	2.59639	FALSE	16.1808750013046	13.5125371649315	13.7208770455038	16.149278904578	15.7528236902207	15.6417159996639
G4LXG3	tr|G4LXG3|G4LXG3_SCHMA rRNA adenine N(6)-methyltransferase OS=Schistosoma mansoni GN=Smp_077020 PE=3 SV=1	2	35.1	0.000678452	3.16848	1.79929	3.48049	TRUE	15.6226302166698	15.0423310660558	14.776403810014	13.2833653882194	13.3388459562242	13.4212866073686
G4LXG6	tr|G4LXG6|G4LXG6_SCHMA Uncharacterized protein OS=Schistosoma mansoni GN=Smp_103010 PE=4 SV=1	3	20.892	0.00995695	2.00187	0.739461	1.66955	FALSE	19.6668516433261	19.566394741833	19.8993137539807	18.9241808461422	18.9155793871696	19.0744165965683
G4LXG8	tr|G4LXG8|G4LXG8_SCHMA Uncharacterized protein OS=Schistosoma mansoni GN=Smp_004550.1 PE=4 SV=1	5	17.376	0.843832	0.0737441	-0.0428012	1.03011	FALSE	20.1302174373951	20.5474961114731	20.327811831361	20.3595199463986	20.5044504317563	20.2699586423338
G4LXH6	tr|G4LXH6|G4LXH6_SCHMA Red protein (Ik factor) (Cytokine ik), putative OS=Schistosoma mansoni GN=Smp_004480 PE=4 SV=1	8	66.921	0.0104668	1.98018	1.5949	3.02073	FALSE	19.2723186141483	18.6162249024821	18.8879369378378	17.81088378625	17.7079594700077	16.4729518739642
G4LXH7;Q9GNF6	tr|G4LXH7|G4LXH7_SCHMA Peroxiredoxin, Prx3 OS=Schistosoma mansoni GN=Smp_004470.1 PE=4 SV=1;tr|Q9GNF6|Q9GNF6_SCHMA Thioredoxin peroxidase 3 OS=Schistosoma mansoni GN=TPx3 PE=2 SV=1	9	24.881	0.324925	0.488216	0.193912	1.14386	FALSE	22.867245216118	22.9383087539192	22.9422092064528	22.7208411085777	22.8207743329525	22.6244120474801
G4LXI6	tr|G4LXI6|G4LXI6_SCHMA Uncharacterized protein OS=Schistosoma mansoni GN=Smp_004360.1 PE=4 SV=1	4	25.586	0.616425	0.21012	0.223542	1.1676	FALSE	21.0216927030013	20.278167516275	19.4220081361803	19.9579049062578	20.0462883209844	20.0470486715162
G4LXI7	tr|G4LXI7|G4LXI7_SCHMA Ubiquitin-conjugating enzyme E2 l, putative OS=Schistosoma mansoni GN=Smp_004350 PE=3 SV=1	6	18.205	0.330785	0.480454	0.282357	1.21618	FALSE	20.8886455166144	20.4531760876929	20.0965359035547	20.0364107666799	20.293480992354	20.2613952427851
G4LXI8	tr|G4LXI8|G4LXI8_SCHMA ATP-binding cassette, sub-family E (Oabp),member, putative OS=Schistosoma mansoni GN=Smp_124460 PE=4 SV=1	18	61.936	0.0154674	1.81058	0.955039	1.93863	FALSE	21.1983383703991	21.12317142997	21.3824348629957	20.2539844781174	19.8509517097126	20.7338921587924
G4LXJ2	tr|G4LXJ2|G4LXJ2_SCHMA DNAj homolog subfamily C member, putative OS=Schistosoma mansoni GN=Smp_083450 PE=4 SV=1	9	32.217	0.0713949	1.14633	0.677308	1.59915	FALSE	21.0374100471745	20.4310126379497	20.3293419520704	20.0820575207019	20.1787701365134	19.5050136759945
G4LXK2;G4LXK3	tr|G4LXK2|G4LXK2_SCHMA Calpain-7 (C02 family) OS=Schistosoma mansoni GN=Smp_083530.2 PE=3 SV=1;tr|G4LXK3|G4LXK3_SCHMA Calpain-7 (C02 family) OS=Schistosoma mansoni GN=Smp_083530.1 PE=3 SV=1	4	177.77	0.00892198	2.04954	-2.76064	6.77698	TRUE	13.0988186762642	15.5784123935044	13.071879032227	16.7135962231989	16.6107383343261	16.7067048827709
G4LXL2	tr|G4LXL2|G4LXL2_SCHMA Sorting nexin, putative OS=Schistosoma mansoni GN=Smp_167550 PE=4 SV=1	6	65.709	0.0168889	1.7724	1.21422	2.32015	FALSE	19.1299864427149	18.9895430116363	18.8608380874595	18.3472844001771	17.0608365371105	17.9295952958058
G4LXM5	tr|G4LXM5|G4LXM5_SCHMA Ubiquitinyl hydrolase 1 OS=Schistosoma mansoni GN=Smp_069960 PE=3 SV=1	19	102.56	0.000815106	3.08879	1.11955	2.17279	TRUE	19.9152857665339	19.893044778585	19.8536061315558	18.768879399486	18.8250056987705	18.70940900579
G4LXM6	tr|G4LXM6|G4LXM6_SCHMA TATA-binding protein-associated phosphoprotein,putative OS=Schistosoma mansoni GN=Smp_198790 PE=4 SV=1	4	22.352	0.779841	0.107994	0.0789994	1.05629	FALSE	19.6807962518541	19.5229285680313	19.099767097916	19.3584491370718	19.6629356460296	19.0451087973997
G4LXQ5	tr|G4LXQ5|G4LXQ5_SCHMA Uncharacterized protein OS=Schistosoma mansoni GN=Smp_045400 PE=4 SV=1	8	62.741	0.583406	0.234029	-0.123925	1.0897	FALSE	19.0923966937605	18.9415343235226	18.7714021091349	18.8248610563703	19.1440889719914	19.2081578006632
G4LXR1	tr|G4LXR1|G4LXR1_SCHMA Vacuolar membrane protein related OS=Schistosoma mansoni GN=Smp_142210 PE=4 SV=1	2	128.36	2.95639e-07	6.52924	5.44287	43.4977	TRUE	19.024505814261	18.5891108993239	18.7042450288913	13.2833653882194	13.3388459562242	13.367052131368
G4LXR6;G4LXR7	tr|G4LXR6|G4LXR6_SCHMA Proliferation-associated protein 2G4, 38kDa (M24 family) OS=Schistosoma mansoni GN=Smp_150690.1 PE=4 SV=1;tr|G4LXR7|G4LXR7_SCHMA Proliferation-associated protein 2G4, 38kDa (M24 family) OS=Schistosoma mansoni GN=Smp_150690.2 PE=4 SV=	20	43.034	0.818333	0.0870702	-0.0816426	1.05822	FALSE	24.2407153001727	24.367732901071	24.3923172892175	24.8021105756586	24.7230186071416	23.7205642028058
G4LXR9	tr|G4LXR9|G4LXR9_SCHMA NADH-cytochrome b5 reductase OS=Schistosoma mansoni GN=Smp_053230 PE=3 SV=1	18	33.936	0.000573339	3.24159	-1.73706	3.33354	TRUE	22.4696113382793	22.7743676290912	23.0952732830336	24.6248235848202	24.2510913455704	24.6745062818957
G4LXS1;G4LXS0	tr|G4LXS1|G4LXS1_SCHMA Aldo-keto reductase, putative OS=Schistosoma mansoni GN=Smp_053220.2 PE=4 SV=1;tr|G4LXS0|G4LXS0_SCHMA Aldo-keto reductase, putative OS=Schistosoma mansoni GN=Smp_053220.1 PE=4 SV=1	17	32.492	0.753858	0.12271	0.0674793	1.04788	FALSE	24.5255952191872	24.4433324494274	24.4319445682181	24.5014974451523	24.5548891697672	24.142047849785
G4LXS3	tr|G4LXS3|G4LXS3_SCHMA Uncharacterized protein OS=Schistosoma mansoni GN=Smp_053190 PE=4 SV=1	2	65.524	0.15445	0.811213	-1.98432	3.95676	FALSE	14.5507488031484	13.8074778086402	15.0456362689245	15.4962820050024	14.6610488196272	19.1994955749839
G4LXT2	tr|G4LXT2|G4LXT2_SCHMA 40S ribosomal protein S6 OS=Schistosoma mansoni GN=Smp_053130 PE=3 SV=1	6	28.748	0.811601	0.0906574	0.409784	1.32849	FALSE	19.5563346738232	18.8978367473804	18.5595187714909	17.5536675409116	15.8783658641348	22.352303291957
G4LXT4	tr|G4LXT4|G4LXT4_SCHMA Uncharacterized protein OS=Schistosoma mansoni GN=Smp_150610 PE=4 SV=1	3	22.054	0.0362822	1.44031	1.18888	2.27975	FALSE	18.8473071637946	18.376449808528	19.021387804758	18.3109522727281	17.591713243995	16.775852851715
G4LXT7	tr|G4LXT7|G4LXT7_SCHMA ADP-ribosylation factor, arf, putative OS=Schistosoma mansoni GN=Smp_086900 PE=3 SV=1	6	20.165	0.199524	0.700005	-0.555837	1.47002	FALSE	17.5144211520318	18.4014505841405	18.6611958000597	18.6772042333033	19.1616996249763	18.4056758351543
G4LXU1	tr|G4LXU1|G4LXU1_SCHMA Uncharacterized protein OS=Schistosoma mansoni GN=Smp_169410 PE=4 SV=1	4	95.688	0.728525	0.137556	-0.135033	1.09812	FALSE	14.1727553389818	15.0177201803934	15.030665618346	15.146376815574	15.1503569074842	14.3295065380302
G4LXU9	tr|G4LXU9|G4LXU9_SCHMA DNA polymerase OS=Schistosoma mansoni GN=Smp_087010 PE=3 SV=1	10	133.02	0.320579	0.494064	-1.34677	2.54342	FALSE	11.3346917478763	14.4203352787562	15.6301112720207	15.1682819088483	13.8566655235257	16.4004949861231
G4LXV1	tr|G4LXV1|G4LXV1_SCHMA Rab-18, putative OS=Schistosoma mansoni GN=Smp_169470 PE=4 SV=1	4	22.704	0.0130341	1.88492	0.950546	1.9326	FALSE	19.1288842666705	19.0452907054954	18.530207931784	18.2061344498273	17.9935086322053	17.6531020205066
G4LXV4	tr|G4LXV4|G4LXV4_SCHMA WD-repeat protein, putative OS=Schistosoma mansoni GN=Smp_062970 PE=4 SV=1	2	153.91	0.0652654	1.18532	1.25777	2.39125	FALSE	15.9985872153991	15.8583045863481	15.8411753389355	13.3961931539686	15.0982826161742	15.4302937266658
G4LXV5	tr|G4LXV5|G4LXV5_SCHMA Tetraspanin OS=Schistosoma mansoni GN=Smp_062980 PE=3 SV=1	1	25.972	0.966065	0.0149936	0.0198678	1.01387	FALSE	20.0440643471208	18.7638599712728	18.511998114066	19.3692154508179	18.9003992278138	18.9907042740844
G4LXV8	tr|G4LXV8|G4LXV8_SCHMA Actin-like protein 6, acl6 OS=Schistosoma mansoni GN=Smp_063040 PE=3 SV=1	13	45.541	0.0237331	1.62465	0.615212	1.53178	FALSE	20.9050417350371	20.7790905462076	20.6626531348133	19.97104910351	20.3262905521041	20.2038088111493
G4LXW3	tr|G4LXW3|G4LXW3_SCHMA High-density lipoprotein receptor (Hdl) OS=Schistosoma mansoni GN=Smp_170110 PE=4 SV=1	16	83.708	0.00838419	2.07654	3.61063	12.2154	TRUE	19.1694600542995	19.0924595722848	19.0849223688459	16.4663766812462	13.3388459562242	16.7097294978586
G4LXX5;G4LXX6	tr|G4LXX5|G4LXX5_SCHMA Cysteine synthase, putative OS=Schistosoma mansoni GN=Smp_125070.1 PE=4 SV=1;tr|G4LXX6|G4LXX6_SCHMA Cysteine synthase, putative OS=Schistosoma mansoni GN=Smp_125070.2 PE=4 SV=1	8	56.108	0.00673965	2.17136	1.91618	3.77422	TRUE	18.8031899811479	19.5622862602019	18.6023057929991	17.1055429583713	16.3157669724172	17.7979407743476
G4LXY8	tr|G4LXY8|G4LXY8_SCHMA Adenylyl cyclase-associated protein, putative OS=Schistosoma mansoni GN=Smp_161550 PE=4 SV=1	3	44.307	0.0131143	1.88226	-2.44462	5.44383	FALSE	13.2980158167032	13.5125371649315	15.7681236279129	16.9048736248833	16.3790077085765	16.6286615919056
G4LXZ2	tr|G4LXZ2|G4LXZ2_SCHMA Ribosomal protein l7ae, putative OS=Schistosoma mansoni GN=Smp_104660 PE=4 SV=1	3	13.67	0.000275283	3.56022	1.99856	3.99601	TRUE	23.036130494948	22.8840885838407	22.6485425186739	20.9017746181887	21.1711856362227	20.500125195058
G4LXZ3	tr|G4LXZ3|G4LXZ3_SCHMA Rab15, 13, 10, 1, 35, 5, and, putative OS=Schistosoma mansoni GN=Smp_104670 PE=4 SV=1	4	23.904	0.000983959	3.00702	-1.64507	3.12763	TRUE	19.0172994154611	19.4844025220908	19.7956353282402	20.9658885062171	20.9980171696961	21.268638524057
G4LXZ4;G4LXZ5	tr|G4LXZ4|G4LXZ4_SCHMA Uncharacterized protein OS=Schistosoma mansoni GN=Smp_104680.2 PE=3 SV=1;tr|G4LXZ5|G4LXZ5_SCHMA Uncharacterized protein OS=Schistosoma mansoni GN=Smp_104680.1 PE=3 SV=1	1	20.199	0.215913	0.665721	-0.307131	1.23724	FALSE	17.5917069906417	17.7369884316029	17.8442765527954	17.9784275825735	18.311164249921	17.8047717905642
G4LXZ9;G4LY00	tr|G4LXZ9|G4LXZ9_SCHMA UDP-N-acetylglucosamine--dolichyl-phosphate N-acetylglucosaminephosphotransferase OS=Schistosoma mansoni GN=Smp_051360.2 PE=4 SV=1;tr|G4LY00|G4LY00_SCHMA UDP-N-acetylglucosamine--dolichyl-phosphate N-acetylglucosaminephosphotransfera	1	52.392	0.0706128	1.15112	-2.2502	4.75748	FALSE	13.2980158167032	15.8137941244214	17.3437013745903	18.1977768804578	17.6203655767244	17.3879616223107
G4LY02	tr|G4LY02|G4LY02_SCHMA NIF3-like protein 1 OS=Schistosoma mansoni GN=Smp_051390 PE=3 SV=1	11	39.11	0.117091	0.931475	-0.341958	1.26748	FALSE	20.3779981285436	20.5978843154145	20.5646063961309	20.8408933078982	20.7862084195541	20.9392621717913
G4LY12	tr|G4LY12|G4LY12_SCHMA Uncharacterized protein OS=Schistosoma mansoni GN=Smp_212450 PE=4 SV=1	3	32.783	0.197623	0.704163	1.58893	3.00827	FALSE	17.0891318088822	17.7664199899782	17.4089372860185	16.5790355800482	13.3388459562242	17.5798054255639
G4LY19	tr|G4LY19|G4LY19_SCHMA Splicing factor Prp8, putative (Fragment) OS=Schistosoma mansoni GN=Smp_140890 PE=4 SV=1	35	245.72	0.405509	0.392	-1.13678	2.1989	FALSE	14.5699906484486	14.0505515728607	16.9484738246707	15.4077363410459	14.8360414552991	18.7355906316374
G4LY20	tr|G4LY20|G4LY20_SCHMA C-terminal pdz ligand of neuronal nitric oxide synthase protein, putative OS=Schistosoma mansoni GN=Smp_163650 PE=4 SV=1	1	103.55	0.22433	0.649112	0.693781	1.61752	FALSE	16.5888137465016	16.6436880050276	17.7663994382043	16.7789896919927	16.6910872959422	15.4474822845571
G4LY21	tr|G4LY21|G4LY21_SCHMA DNA-(apurinic or apyrimidinic site) lyase OS=Schistosoma mansoni GN=Smp_051320 PE=3 SV=1	13	32.153	0.163091	0.787571	-0.352104	1.27642	FALSE	21.5251899108432	21.6236392676176	21.4818454600334	21.8715447058462	22.1819815140953	21.633459843167
G4LY23	tr|G4LY23|G4LY23_SCHMA Tar DNA-binding protein, putative OS=Schistosoma mansoni GN=Smp_051300 PE=4 SV=1	6	38.939	0.0949367	1.02257	0.793139	1.73284	FALSE	20.3836432888519	20.3504880411705	20.1508675054623	19.8550308899344	19.9927916938409	18.6577604797109
G4LY24	tr|G4LY24|G4LY24_SCHMA Uncharacterized protein OS=Schistosoma mansoni GN=Smp_051290 PE=4 SV=1	4	66.833	0.00023389	3.63099	-3.23003	9.38287	TRUE	13.2980158167032	13.5125371649315	13.7208770455038	16.026927116813	16.7287759388995	17.465813552729
G4LY27	tr|G4LY27|G4LY27_SCHMA Smg-7 (Suppressor with morphological effect on genitalia protein 7), putative OS=Schistosoma mansoni GN=Smp_051280 PE=4 SV=1	3	129.91	0.073754	1.13221	0.542058	1.45605	FALSE	16.9091356545983	16.6136264812601	16.4148403791462	16.1616383476564	15.8031553657709	16.3466361293412
G4LY28	tr|G4LY28|G4LY28_SCHMA TATA-binding protein-associated phosphoprotein (Dr1), putative OS=Schistosoma mansoni GN=Smp_149540 PE=4 SV=1	2	27.077	0.562415	0.249943	-0.908299	1.87683	FALSE	19.1309457169084	18.7238767112962	13.7208770455038	17.7226810799659	18.6773032542262	17.9006109877112
G4LY29	tr|G4LY29|G4LY29_SCHMA 60S ribosomal protein L8, putative OS=Schistosoma mansoni GN=Smp_051260 PE=3 SV=1	7	28.207	0.923769	0.0344365	-0.128731	1.09333	FALSE	20.3117216478358	20.7752204461324	20.6732078781202	19.6004796101558	18.8108878655892	23.7349750256741
G4LY33;G4LY31;G4LY34;G4LY32	tr|G4LY33|G4LY33_SCHMA Tar DNA-binding protein, putative OS=Schistosoma mansoni GN=Smp_051230.2 PE=4 SV=1;tr|G4LY31|G4LY31_SCHMA Tar DNA-binding protein, putative OS=Schistosoma mansoni GN=Smp_051230.3 PE=4 SV=1;tr|G4LY34|G4LY34_SCHMA Tar DNA-binding prote	7	45.708	0.00411793	2.38532	0.913834	1.88405	FALSE	22.5681543070154	22.3551103198564	22.3324666988862	21.4942302552569	21.6694376253536	21.3505610725457
G4LY35	tr|G4LY35|G4LY35_SCHMA Uncharacterized protein OS=Schistosoma mansoni GN=Smp_051220 PE=4 SV=1	1	27.145	0.0521808	1.28249	-1.98466	3.95768	FALSE	13.2980158167032	14.9983877184682	16.3024608370423	16.7983499950695	17.56062376607	16.1938608378054
G4LY37;G4LY38	tr|G4LY37|G4LY37_SCHMA Importin subunit alpha OS=Schistosoma mansoni GN=Smp_051210.1 PE=3 SV=1;tr|G4LY38|G4LY38_SCHMA Importin subunit alpha OS=Schistosoma mansoni GN=Smp_051210.3 PE=3 SV=1	11	58.778	0.481004	0.317851	-0.14363	1.10468	FALSE	22.5713313653166	22.5024651248794	22.4122095540369	22.5692583300012	22.5387463099609	22.8088912570736
G4LY44	tr|G4LY44|G4LY44_SCHMA Replication factor C / DNA polymerase III gamma-tau subunit, putative OS=Schistosoma mansoni GN=Smp_096360 PE=4 SV=1	12	40.204	0.0873557	1.05871	0.606633	1.5227	FALSE	20.94760642344	20.3532943362165	20.6490160311589	19.9439051486727	20.4827599333467	19.7033520729597
G4LY49	tr|G4LY49|G4LY49_SCHMA Alpha-l-fucosidase, putative OS=Schistosoma mansoni GN=Smp_146250 PE=4 SV=1	5	59.179	0.018559	1.73144	-1.66724	3.17607	FALSE	14.6006803859699	16.1075882368143	16.3541469861299	17.5258830084627	17.569575047714	16.9686837643759
G4LY51	tr|G4LY51|G4LY51_SCHMA Uncharacterized protein OS=Schistosoma mansoni GN=Smp_044680 PE=4 SV=1	21	58.115	0.169233	0.771516	-1.72379	3.30304	FALSE	19.6989981853369	19.4234759774969	19.975148777674	21.1663575598233	19.3243314825566	23.7783186779352
G4LY57;G4LY56	tr|G4LY57|G4LY57_SCHMA Pumilio, putative OS=Schistosoma mansoni GN=Smp_155000.2 PE=4 SV=1;tr|G4LY56|G4LY56_SCHMA Pumilio, putative OS=Schistosoma mansoni GN=Smp_155000.1 PE=4 SV=1	2	140.07	0.645383	0.190182	0.224364	1.16826	FALSE	15.4066629268843	15.0878539180517	15.8476817590598	14.4133279066017	16.0267922581769	15.2289865418598
G4LY59	tr|G4LY59|G4LY59_SCHMA Heat shock protein 70 (Hsp70)-interacting protein, putative OS=Schistosoma mansoni GN=Smp_155020 PE=4 SV=1	12	117.83	0.348822	0.457396	0.594555	1.51001	FALSE	17.8681670098389	17.9300791296386	17.2668057655417	17.3382388611923	15.8924813264754	18.0506676249776
G4LY60	tr|G4LY60|G4LY60_SCHMA 60S ribosomal protein L35a, putative OS=Schistosoma mansoni GN=Smp_061200 PE=4 SV=1	4	14.979	0.449426	0.347342	1.6419	3.12077	FALSE	18.9336862225668	19.0497572571773	19.0326684266426	17.0396367774963	13.3388459562242	21.7119195281466
G4LY63	tr|G4LY63|G4LY63_SCHMA Succinate dehydrogenase [ubiquinone] flavoprotein subunit, mitochondrial OS=Schistosoma mansoni GN=Smp_061230 PE=3 SV=1	28	71.427	0.419609	0.377156	0.210335	1.15696	FALSE	22.9848057746618	23.1203217137398	23.4711111191167	23.2484059895373	22.9389105963826	22.7579169368221
G4LY73;G4LY72	tr|G4LY73|G4LY73_SCHMA Set, putative OS=Schistosoma mansoni GN=Smp_155060.1 PE=3 SV=1;tr|G4LY72|G4LY72_SCHMA Set, putative OS=Schistosoma mansoni GN=Smp_155060.2 PE=3 SV=1	9	26.653	0.108394	0.964996	0.584079	1.49908	FALSE	26.516787943405	25.9734695657222	25.8125339095745	25.6851425248437	25.7839361282633	25.081476773919
G4LY76;G4LY75;G4LY74	tr|G4LY76|G4LY76_SCHMA Synaptic glycoprotein sc2 related OS=Schistosoma mansoni GN=Smp_081820.4 PE=4 SV=1;tr|G4LY75|G4LY75_SCHMA Synaptic glycoprotein sc2 related OS=Schistosoma mansoni GN=Smp_081820.3 PE=4 SV=1;tr|G4LY74|G4LY74_SCHMA Synaptic glycoprotein	4	35.432	0.490546	0.30932	-0.92197	1.8947	FALSE	13.4323814903038	14.19563611937	17.9375562139545	15.0842423741197	16.8707691097788	16.3764723918764
G4LY77	tr|G4LY77|G4LY77_SCHMA Hcnp homolog, putative OS=Schistosoma mansoni GN=Smp_166250 PE=4 SV=1	3	35.686	0.133541	0.874386	0.684455	1.60709	FALSE	17.2467835220411	17.3647537144671	18.4155006107193	17.2288884460514	16.5887253703319	17.156058805093
G4LY79	tr|G4LY79|G4LY79_SCHMA Nucleoside diphosphate kinase OS=Schistosoma mansoni GN=Smp_081790 PE=3 SV=1	3	17.314	0.0184106	1.73493	3.32317	10.0086	FALSE	18.5370586948557	18.4157207601836	16.7230175037738	16.6765725860043	13.3388459562242	13.6908642669623
G4LY81	tr|G4LY81|G4LY81_SCHMA Ubiquitin-activating enzyme E1b, putative OS=Schistosoma mansoni GN=Smp_166220 PE=4 SV=1	23	85.392	0.0724271	1.1401	0.81603	1.76055	FALSE	19.851451601498	20.1243279965928	20.1902721214819	19.2425924840116	18.5764436666411	19.8989255492364
G4LY86	tr|G4LY86|G4LY86_SCHMA Ccr4-not transcription complex, putative OS=Schistosoma mansoni GN=Smp_133320 PE=4 SV=1	3	302.04	0.0665399	1.17692	-0.484136	1.39875	FALSE	13.2980158167032	13.5125371649315	13.7365672005139	13.8683278354708	14.1598715604674	13.971328765907
G4LY90	tr|G4LY90|G4LY90_SCHMA Uncharacterized protein OS=Schistosoma mansoni GN=Smp_020590 PE=4 SV=1	5	48.836	0.695809	0.15751	0.129667	1.09404	FALSE	16.2097600281524	16.9340835286222	17.0631843765995	16.7618455581036	16.7956771862179	16.2605048493646
G4LYA2	tr|G4LYA2|G4LYA2_SCHMA Cysteine and histidine-rich domain (Chord)-containing, zinc binding protein, putative OS=Schistosoma mansoni GN=Smp_020800 PE=4 SV=1	18	38.562	0.147524	0.831138	-0.341783	1.26732	FALSE	22.0014379272956	22.0466719358938	22.3016192329142	22.3225500151501	22.6342191180113	22.4183090461921
G4LYA4	tr|G4LYA4|G4LYA4_SCHMA Dolichyl-diphosphooligosaccharide--protein glycosyltransferase subunit DAD1 OS=Schistosoma mansoni GN=Smp_020770 PE=3 SV=1	1	15.086	0.115701	0.936661	-0.593574	1.50898	FALSE	19.0082404997871	19.806698454567	19.8673638723922	20.0040497088347	19.9657483321988	20.4932267780406
G4LYA9	tr|G4LYA9|G4LYA9_SCHMA Jnk stimulatory phosphatase-related OS=Schistosoma mansoni GN=Smp_133450 PE=4 SV=1	3	59.261	0.995888	0.00178946	0.00132244	1.00092	FALSE	18.2995599454014	17.914737717515	17.7541063628768	17.7668393153945	17.9684639255484	18.2291334665487
G4LYB3	tr|G4LYB3|G4LYB3_SCHMA Sec31-related protein OS=Schistosoma mansoni GN=Smp_212490 PE=4 SV=1	8	197.68	0.0161992	1.79051	-1.07615	2.1084	FALSE	16.1073698248154	16.0827125404295	15.1982782764492	16.6283669279084	17.0463159612032	16.9421194483847
G4LYB8;G4LYB6;G4LYB7	tr|G4LYB8|G4LYB8_SCHMA Heterogeneous nuclear ribonucleoprotein,putative OS=Schistosoma mansoni GN=Smp_056810.3 PE=4 SV=1;tr|G4LYB6|G4LYB6_SCHMA Heterogeneous nuclear ribonucleoprotein,putative OS=Schistosoma mansoni GN=Smp_056810.2 PE=4 SV=1;tr|G4LYB7|G4LY	6	41.934	0.0176054	1.75435	0.754233	1.68673	FALSE	21.6557116554158	21.1962521836076	21.2526094436655	20.6247826555596	20.7971726413745	20.4199189236578
G4LYB9	tr|G4LYB9|G4LYB9_SCHMA SWI/SNF complex-related OS=Schistosoma mansoni GN=Smp_152650 PE=4 SV=1	16	141.07	0.0829671	1.08109	-0.385325	1.30615	FALSE	18.9759402997318	18.8783705974781	19.0934939326772	19.2853122270141	19.4340299177344	19.3844384158497
G4LYC0	tr|G4LYC0|G4LYC0_SCHMA SWI/SNF-related matrix-associated actin-dependent regulator of chromatin subfamily C member 1(Smarcc1) OS=Schistosoma mansoni GN=Smp_152640 PE=4 SV=1	1	35.345	0.226287	0.645341	1.03626	2.0509	FALSE	15.7950273962191	16.4858164775598	16.8855562212325	16.3586066588863	16.0081591150463	13.6908642669623
G4LYC3;Q26593	tr|G4LYC3|G4LYC3_SCHMA Protein disulfide-isomerase OS=Schistosoma mansoni GN=Smp_056760 PE=3 SV=1;tr|Q26593|Q26593_SCHMA Protein disulfide-isomerase OS=Schistosoma mansoni PE=3 SV=1	35	54.16	0.148311	0.828826	-0.371779	1.29395	FALSE	25.1590394915761	24.8716460746042	25.0440839133939	25.3090115773082	25.6837453882478	25.1973494162548
G4LYD2	tr|G4LYD2|G4LYD2_SCHMA Membrane associated ring finger 1,8, putative OS=Schistosoma mansoni GN=Smp_056700 PE=4 SV=1	6	74.451	2.51044e-06	5.60025	4.06099	16.6909	TRUE	17.2970297885956	17.5244417749564	17.674565585185	13.2833653882194	13.3388459562242	13.6908642669623
G4LYD3;G4LYD4	tr|G4LYD3|G4LYD3_SCHMA Pyridoxine kinase OS=Schistosoma mansoni GN=Smp_164250.2 PE=4 SV=1;tr|G4LYD4|G4LYD4_SCHMA Pyridoxine kinase OS=Schistosoma mansoni GN=Smp_164250.1 PE=4 SV=1	3	36.891	0.196955	0.705632	0.546673	1.46071	FALSE	16.959858846265	16.9607173005021	16.9613634836465	16.8986472744563	16.7221472910783	15.6211262965819
G4LYD9	tr|G4LYD9|G4LYD9_SCHMA Importin-alpha re-exporter (Chromosome segregation 1-like protein) OS=Schistosoma mansoni GN=Smp_128050 PE=4 SV=1	30	117.34	0.0522469	1.28194	0.460294	1.37582	FALSE	21.9437700032959	21.9414030906254	21.8376941248795	21.3365524845645	21.3919294804421	21.6135037243144
G4LYE5	tr|G4LYE5|G4LYE5_SCHMA Uncharacterized protein OS=Schistosoma mansoni GN=Smp_152440 PE=4 SV=1	11	60.625	0.0955496	1.01977	0.53759	1.45155	FALSE	19.8718908097538	19.3496554969415	19.1917411053377	18.851319171313	19.2087155867462	18.7404836387844
G4LYE6	tr|G4LYE6|G4LYE6_SCHMA Proteasome subunit beta OS=Schistosoma mansoni GN=Smp_056500 PE=3 SV=1	7	27.78	0.677987	0.168779	-0.109285	1.07869	FALSE	21.7505904788297	21.7484274107449	21.6359234208625	21.7876907078019	22.2068620962242	21.4682442763091
G4LYF4	tr|G4LYF4|G4LYF4_SCHMA Uncharacterized protein OS=Schistosoma mansoni GN=Smp_198820 PE=4 SV=1	4	29.107	0.00792693	2.1009	3.59325	12.0691	TRUE	19.0110220463574	18.8511279622873	18.6702691066697	13.2833653882194	16.9254111158219	15.54389595418
G4LYF6	tr|G4LYF6|G4LYF6_SCHMA Phosphatidylcholine-sterol acyltransferase (Lecithin-cholesterol acyltransferase)/ Phospholipase A OS=Schistosoma mansoni GN=Smp_166500.1 PE=4 SV=1	3	46.242	0.0613643	1.21208	-1.75179	3.36776	FALSE	16.4462496493902	16.1893958221311	13.7208770455038	17.5095193489169	17.1538706908603	16.9484961832894
G4LYF7	tr|G4LYF7|G4LYF7_SCHMA Troponin t, invertebrate, putative OS=Schistosoma mansoni GN=Smp_179810 PE=4 SV=1	10	37.437	0.700118	0.154829	0.113641	1.08196	FALSE	22.4509901888505	22.8256193288149	22.1323805512376	22.3804800380316	22.0422748735128	22.6453113191555
G4LYF8	tr|G4LYF8|G4LYF8_SCHMA ADP-ribosylation factor family OS=Schistosoma mansoni GN=Smp_000730 PE=3 SV=1	6	20.114	0.109937	0.958855	-0.918335	1.88993	FALSE	19.6671455759998	19.274575179015	19.2339116924795	20.8826780459992	20.7937192491114	19.2542409673428
G4LYG3	tr|G4LYG3|G4LYG3_SCHMA Ornithine transporter 2 (Solute carrier family 25 member 2) OS=Schistosoma mansoni GN=Smp_000680 PE=3 SV=1	3	33.757	0.911861	0.0400715	0.16076	1.11788	FALSE	16.8165629486306	15.3094815803618	17.4939524809912	17.6641361391666	13.3388459562242	18.1347352995906
G4LYH2	tr|G4LYH2|G4LYH2_SCHMA Notchless homolog 1 OS=Schistosoma mansoni GN=Smp_000600 PE=4 SV=1	8	61.99	0.00117557	2.92975	3.30842	9.90682	TRUE	17.160336397905	17.6850656398	17.3624102290448	13.2833653882194	15.3083181062119	13.6908642669623
G4LYH3	tr|G4LYH3|G4LYH3_SCHMA Uncharacterized protein OS=Schistosoma mansoni GN=Smp_000590.1 PE=4 SV=1	2	25.114	0.0410475	1.38671	1.34812	2.5458	FALSE	17.9643465849848	17.9318046085869	17.5297240170305	16.0532790895668	17.5774003736888	15.7508342896871
G4LYH5;G4LYH6	tr|G4LYH5|G4LYH5_SCHMA Zinc finger protein, putative OS=Schistosoma mansoni GN=Smp_122370.1 PE=4 SV=1;tr|G4LYH6|G4LYH6_SCHMA Zinc finger protein, putative OS=Schistosoma mansoni GN=Smp_122370.2 PE=4 SV=1	16	141.26	0.994613	0.00234602	-0.00869602	1.00605	FALSE	14.6360260341517	13.6292707644928	14.8969930272164	12.6505091522036	13.3388459562242	17.1990227766998
G4LYI3	tr|G4LYI3|G4LYI3_SCHMA Gdp-mannose pyrophosphorylase b, isoform 2 OS=Schistosoma mansoni GN=Smp_000510 PE=4 SV=1	7	45.99	0.00425838	2.37076	-2.65555	6.30086	TRUE	16.2437123652581	17.8515102850776	18.4857427476147	20.1185118468948	20.164197975409	20.2649045975705
G4LYI7	tr|G4LYI7|G4LYI7_SCHMA Eukaryotic translation initiation factor 3 subunit C OS=Schistosoma mansoni GN=Smp_000480 PE=3 SV=1	29	100.22	0.0230023	1.63823	0.888533	1.85129	FALSE	20.0627842391535	20.5125890147549	20.8227112029605	19.4505913744284	19.3672929282148	19.914600117557
G4LYI8	tr|G4LYI8|G4LYI8_SCHMA ATP-dependent (S)-NAD(P)H-hydrate dehydratase OS=Schistosoma mansoni GN=Smp_000470 PE=3 SV=1	6	31.975	0.459386	0.337823	0.220516	1.16515	FALSE	18.8420664279112	19.2631253330267	19.2478068934243	18.8904124061226	18.5146552669426	19.2863820227853
G4LYJ0	tr|G4LYJ0|G4LYJ0_SCHMA Uncharacterized protein OS=Schistosoma mansoni GN=Smp_000460 PE=4 SV=1	17	89.086	0.000404171	3.39343	1.50086	2.83011	TRUE	22.4315849749032	22.2942394762974	22.0940668366862	20.8731719560338	20.8552809989079	20.5888564354961
G4LYJ1	tr|G4LYJ1|G4LYJ1_SCHMA Uncharacterized protein (Fragment) OS=Schistosoma mansoni GN=Smp_000440 PE=4 SV=1	2	46.626	5.95677e-06	5.22499	4.2966	19.652	TRUE	18.1706698905194	17.4505770907748	17.581631275768	13.2833653882194	13.3388459562242	13.6908642669623
G4LYK3	tr|G4LYK3|G4LYK3_SCHMA WD40-repeat containing protein OS=Schistosoma mansoni GN=Smp_151180 PE=4 SV=1	1	35.329	0.740799	0.1303	0.0792379	1.05646	FALSE	17.2547589284133	17.5319473970149	17.2403141957725	17.4559901475091	16.9631447432684	17.3701720249068
G4LYK6	tr|G4LYK6|G4LYK6_SCHMA V-type proton ATPase subunit G OS=Schistosoma mansoni GN=Smp_054220 PE=3 SV=1	3	13.674	0.366104	0.436396	-1.48027	2.79001	FALSE	18.3265445480298	19.4656787254732	13.7208770455038	19.0284724583303	19.0779731453084	17.8474660620389
G4LYK7	tr|G4LYK7|G4LYK7_SCHMA NADH-ubiquinone oxidoreductase sgdh subunit,putative OS=Schistosoma mansoni GN=Smp_054200 PE=4 SV=1	3	24.033	0.88542	0.0528505	-0.0362809	1.02547	FALSE	19.6170066344366	19.2936389833767	19.031814326282	19.3491723398087	19.161036070487	19.5410943292078
G4LYL3	tr|G4LYL3|G4LYL3_SCHMA Glutamyl-tRNA(Gln) amidotransferase subunit A,putative OS=Schistosoma mansoni GN=Smp_031990 PE=4 SV=1	4	58.311	0.514113	0.288942	-0.245295	1.18534	FALSE	16.8487072429588	17.7955076933779	17.6091014410208	17.5586672697657	18.1032226282254	17.3273121795117
G4LYL8	tr|G4LYL8|G4LYL8_SCHMA Tuftelin interacting protein, putative OS=Schistosoma mansoni GN=Smp_139510 PE=4 SV=1	4	84.614	0.139293	0.856071	0.777636	1.71432	FALSE	14.8069561717831	14.874300933169	14.6435919815888	13.6764917151816	13.3388459562242	14.9766042654301
G4LYM0	tr|G4LYM0|G4LYM0_SCHMA Uncharacterized protein OS=Schistosoma mansoni GN=Smp_032060 PE=4 SV=1	2	14.247	0.106332	0.973335	2.99316	7.96217	FALSE	20.2403943455715	20.4149847267921	19.0555736694553	13.2833653882194	18.9823991894384	18.4657051242564
G4LYN1	tr|G4LYN1|G4LYN1_SCHMA Neuroendocrine differentiation factor, putative OS=Schistosoma mansoni GN=Smp_032150 PE=3 SV=1	2	24.264	0.799149	0.0973722	-0.0781112	1.05564	FALSE	18.4758469237649	18.1764581078671	17.8738602719199	18.0476703851129	18.7034444270748	18.0093841968386
G4LYN4	tr|G4LYN4|G4LYN4_SCHMA ADP-ribosylation factor, arf, putative OS=Schistosoma mansoni GN=Smp_032180 PE=4 SV=1	7	20.377	0.422151	0.374533	-0.165322	1.12142	FALSE	22.3642184430425	22.3121123043302	22.5123533053284	22.4083101700106	22.6689215958634	22.6074196599199
G4LYN6	tr|G4LYN6|G4LYN6_SCHMA Lipopolysaccharide kinase,putative OS=Schistosoma mansoni GN=Smp_139630 PE=4 SV=1	3	71.256	0.770413	0.113277	-0.0909938	1.0651	FALSE	18.0543631804557	18.0254354250484	17.66859967649	17.9238189403036	18.4987452436556	17.5988153762201
G4LYN7	tr|G4LYN7|G4LYN7_SCHMA Uncharacterized protein OS=Schistosoma mansoni GN=Smp_032230 PE=4 SV=1	3	14.892	0.0434479	1.36203	0.711344	1.63733	FALSE	19.6080273604434	19.8576722721658	19.1701688454889	18.7601532749701	19.1456378699402	18.5960441974065
G4LYN8	tr|G4LYN8|G4LYN8_SCHMA Uncharacterized protein OS=Schistosoma mansoni GN=Smp_032240 PE=4 SV=1	1	15.579	0.310202	0.508356	-1.27428	2.41877	FALSE	18.0581036415629	13.5125371649315	16.8116710867618	17.1952036914598	17.5750265748853	17.4349092186131
G4LYN9	tr|G4LYN9|G4LYN9_SCHMA Family S12 unassigned peptidase (S12 family) OS=Schistosoma mansoni GN=Smp_032250 PE=4 SV=1	4	38.409	0.0916476	1.03788	-2.43085	5.39209	FALSE	13.2980158167032	13.5125371649315	15.780574958683	15.4479465772472	15.4295738407371	19.0061447362227
G4LYP0;Q15ET9	tr|G4LYP0|G4LYP0_SCHMA Ribosomal protein L15 OS=Schistosoma mansoni GN=Smp_032260 PE=3 SV=1;tr|Q15ET9|Q15ET9_SCHMA Ribosomal protein L15 OS=Schistosoma mansoni PE=2 SV=1	6	24.092	0.455389	0.341618	1.32644	2.50783	FALSE	21.2478156158308	21.4143379010486	21.5049866493963	19.9199814161352	16.7072603882279	23.5605797128661
G4LYP2;G4LYP1	tr|G4LYP2|G4LYP2_SCHMA Mitochondrial processing peptidase beta-subunit (M16 family) OS=Schistosoma mansoni GN=Smp_009650.1 PE=3 SV=1;tr|G4LYP1|G4LYP1_SCHMA Mitochondrial processing peptidase beta-subunit (M16 family) OS=Schistosoma mansoni GN=Smp_009650.2	18	53.781	0.832376	0.0796803	-0.0473368	1.03336	FALSE	22.8178806568314	23.2389156296862	23.2950850838152	23.1920647141379	23.1484796420091	23.1533474258572
G4LYP9	tr|G4LYP9|G4LYP9_SCHMA Alanine aminotransferase, putative OS=Schistosoma mansoni GN=Smp_130540 PE=4 SV=1	16	53.992	0.846845	0.072196	0.0447975	1.03154	FALSE	20.5277549427056	20.860904113971	20.7956957059439	20.8897803572839	20.4367948140939	20.7233870513989
G4LYQ2	tr|G4LYQ2|G4LYQ2_SCHMA Prominin (Prom) protein, putative OS=Schistosoma mansoni GN=Smp_130520.1 PE=4 SV=1	10	80.566	0.091667	1.03779	-1.18476	2.27326	FALSE	16.4023849287769	16.7305434024561	18.4315463498267	18.8393816045978	18.043493927622	18.2358885940407
G4LYR6	tr|G4LYR6|G4LYR6_SCHMA Dynein light intermediate chain, putative OS=Schistosoma mansoni GN=Smp_130410 PE=4 SV=1	12	63.475	0.034798	1.45845	-0.700849	1.62546	FALSE	18.9651436540884	19.3883559033267	19.1310811382984	19.9522795447939	20.1353842779043	19.4994633172463
G4LYR8	tr|G4LYR8|G4LYR8_SCHMA Vacuolar-sorting protein SNF8 OS=Schistosoma mansoni GN=Smp_198850 PE=3 SV=1	2	27.617	0.445306	0.351341	-1.0123	2.01713	FALSE	17.45596756286	18.2689717047461	13.7208770455038	18.1175441447002	17.7409865446845	16.6241995449223
G4LYS3	tr|G4LYS3|G4LYS3_SCHMA 39S ribosomal protein L19, mitochondrial, putative OS=Schistosoma mansoni GN=Smp_138670 PE=4 SV=1	10	34.662	0.00241913	2.61634	1.0234	2.03271	TRUE	20.1822844006858	20.1354807236536	20.2718205131004	19.3986372750803	19.0501528082415	19.0705894629036
G4LYS8	tr|G4LYS8|G4LYS8_SCHMA Huntingtin interacting protein-related OS=Schistosoma mansoni GN=Smp_210640 PE=4 SV=1	8	55.421	0.0105189	1.97803	2.42102	5.3555	FALSE	17.2890306668862	16.815845206991	17.3108443527144	13.2833653882194	15.1524949648216	15.716798815432
G4LYS9;C4QPQ2;C4QPQ1	tr|G4LYS9|G4LYS9_SCHMA Mannosyltransferase OS=Schistosoma mansoni GN=Smp_103930.1 PE=3 SV=1;tr|C4QPQ2|C4QPQ2_SCHMA Mannosyltransferase (Fragment) OS=Schistosoma mansoni GN=Smp_103930.6 PE=3 SV=1;tr|C4QPQ1|C4QPQ1_SCHMA Mannosyltransferase (Fragment) OS=Schi	4	68.726	0.0402053	1.39572	-2.40559	5.29853	FALSE	14.1171563096893	13.5125371649315	16.9811784891421	17.1301108343513	17.5155739647584	17.1819640163681
G4LYT1	tr|G4LYT1|G4LYT1_SCHMA Uncharacterized protein OS=Schistosoma mansoni GN=Smp_154000.1 PE=4 SV=1	1	25.186	1.1818e-06	5.92746	-6.24113	75.643	TRUE	13.2980158167032	13.5125371649315	13.7208770455038	19.6869470216905	20.2436074262206	19.3242805064072
G4LYT5	tr|G4LYT5|G4LYT5_SCHMA NADH dehydrogenase [ubiquinone] 1 alpha subcomplex subunit 12 OS=Schistosoma mansoni GN=Smp_082940 PE=3 SV=1	5	16.364	0.816481	0.0880539	-0.0494299	1.03486	FALSE	21.0043489352261	20.9610580329004	20.8318668267691	21.2175823600223	20.8815452304503	20.8464358219823
G4LYU6;Q26606	tr|G4LYU6|G4LYU6_SCHMA Serpin, putative OS=Schistosoma mansoni GN=Smp_090080 PE=3 SV=1;tr|Q26606|Q26606_SCHMA Serpin (Fragment) OS=Schistosoma mansoni GN=SPI PE=2 SV=1	11	46.005	0.000428628	3.36792	-2.13115	4.38068	TRUE	20.1515923946135	20.9152301649311	20.3492243689502	22.9529839156858	22.4235289854201	22.4329936681761
G4LYU9	tr|G4LYU9|G4LYU9_SCHMA Uncharacterized protein OS=Schistosoma mansoni GN=Smp_171300 PE=4 SV=1	3	126.9	0.00680183	2.16737	-2.81525	7.03843	TRUE	13.3511957947396	13.2392977499483	14.6206537941138	16.0302534902518	15.7619008419325	17.8647554469143
G4LYV3	tr|G4LYV3|G4LYV3_SCHMA Nuclear movement protein nudc, putative OS=Schistosoma mansoni GN=Smp_103320 PE=4 SV=1	22	37.485	0.332779	0.477845	0.281167	1.21518	FALSE	24.3545933668817	23.8468308978862	23.697647113706	23.7529238629296	23.8860888511135	23.4165571394306
G4LYV4	tr|G4LYV4|G4LYV4_SCHMA Signal recognition particle 9 kD protein,putative OS=Schistosoma mansoni GN=Smp_103310 PE=4 SV=1	1	14.173	0.0946625	1.02382	2.42444	5.36822	FALSE	18.7997982382206	18.7899946706332	18.3008395318389	17.5707378167735	13.3388459562242	17.7077137925326
G4LYV5	tr|G4LYV5|G4LYV5_SCHMA ADP-ribosylation factor-like 2, arl2 (Fragment) OS=Schistosoma mansoni GN=Smp_164660 PE=3 SV=1	1	18.255	0.493513	0.306702	-0.349627	1.27423	FALSE	16.2003943869324	16.6421929137025	17.0014232265138	16.3108220244509	17.9079332190593	16.6741353444935
G4LYW5	tr|G4LYW5|G4LYW5_SCHMA Ng,ng-dimethylarginine dimethylaminohydrolase,putative OS=Schistosoma mansoni GN=Smp_052560 PE=4 SV=1	1	3.3339	0.370283	0.431466	-0.597254	1.51283	FALSE	20.6269128979559	21.1199403087069	21.1147833136886	21.2446820797717	20.5395319846111	22.8691839569026
G4LYW6	tr|G4LYW6|G4LYW6_SCHMA Ng,ng-dimethylarginine dimethylaminohydrolase,putative (Fragment) OS=Schistosoma mansoni GN=Smp_195000 PE=4 SV=1	6	19.384	0.604953	0.218279	-0.272501	1.2079	FALSE	21.0413836342965	20.1793661062683	20.046417952448	21.1322591773509	19.7617055824287	21.1907072257237
G4LYW7	tr|G4LYW7|G4LYW7_SCHMA Uncharacterized protein OS=Schistosoma mansoni GN=Smp_150320 PE=4 SV=1	16	106.32	0.165123	0.782193	1.00828	2.01152	FALSE	19.1599535401459	19.5211180168325	19.5646300176328	19.0042108160576	16.9693388341285	19.2473033696647
G4LYX0	tr|G4LYX0|G4LYX0_SCHMA Synaptotagmin, putative OS=Schistosoma mansoni GN=Smp_150350 PE=4 SV=1	6	67.831	1.15983e-07	6.93561	6.97722	125.994	TRUE	20.2141486081681	19.9295777973543	20.4409961820088	13.2564584021981	13.3388459562242	13.0577705151808
G4LYX6	tr|G4LYX6|G4LYX6_SCHMA Protein kinase C alpha binding protein,putative OS=Schistosoma mansoni GN=Smp_132940 PE=4 SV=1	7	52.888	0.013219	1.8788	-2.8613	7.26668	FALSE	13.2980158167032	16.1215262913225	16.1494728320929	17.8474407455737	18.213326612534	18.0921376759662
G4LYX7;G4LYX8	tr|G4LYX7|G4LYX7_SCHMA ATP synthase subunit d, mitochondrial OS=Schistosoma mansoni GN=Smp_019750.2 PE=3 SV=1;tr|G4LYX8|G4LYX8_SCHMA Uncharacterized protein OS=Schistosoma mansoni GN=Smp_019750.1 PE=4 SV=1	8	19.958	0.128876	0.889829	0.346912	1.27183	FALSE	22.6462068649274	22.4879490032899	22.5574134045296	22.3013393611543	22.3335568366561	22.0159385709324
G4LYZ1	tr|G4LYZ1|G4LYZ1_SCHMA Glutamate dehydrogenase OS=Schistosoma mansoni GN=Smp_093820 PE=3 SV=1	18	52.403	0.00363157	2.43991	-1.1497	2.21867	TRUE	21.0775835207837	21.3995311509158	21.5368212711414	22.6257973586965	22.1768461853851	22.6603861109085
G4LYZ5;G4LYZ4	tr|G4LYZ5|G4LYZ5_SCHMA DNA ligase OS=Schistosoma mansoni GN=Smp_019840.2 PE=3 SV=1;tr|G4LYZ4|G4LYZ4_SCHMA DNA ligase OS=Schistosoma mansoni GN=Smp_019840.1 PE=3 SV=1	11	87.765	0.390164	0.408752	-1.04985	2.07032	FALSE	13.2980158167032	14.9977076430135	16.6101271882079	16.2507121174309	14.284257446427	17.520442032765
G4LZ03	tr|G4LZ03|G4LZ03_SCHMA Dihydrolipoamide acetyltransferase component of pyruvate dehydrogenase complex OS=Schistosoma mansoni GN=Smp_066410 PE=3 SV=1	16	52.62	0.0053999	2.26761	-0.871158	1.82913	FALSE	20.3047801643574	20.4726163390336	20.6713444264539	21.3002736735365	21.4823513825359	21.2795899250758
G4LZ21	tr|G4LZ21|G4LZ21_SCHMA RNA and export factor binding protein, putative OS=Schistosoma mansoni GN=Smp_005260.1 PE=4 SV=1	9	23.389	0.266171	0.57484	0.781955	1.71946	FALSE	22.4745529797337	22.0739909203638	22.7491679665961	21.3407049321286	20.6093882227975	23.0017533506724
G4LZ24	tr|G4LZ24|G4LZ24_SCHMA Cytochrome C1, putative OS=Schistosoma mansoni GN=Smp_005290 PE=4 SV=1	13	33.544	0.86624	0.0623618	0.0383495	1.02694	FALSE	22.4694357916282	22.2416388354719	22.1749347592871	22.0362876813857	22.4927334574073	22.241939700363
G4LZ30;P15845	tr|G4LZ30|G4LZ30_SCHMA Calcium-binding protein, putative OS=Schistosoma mansoni GN=Smp_005350 PE=4 SV=1;sp|P15845|SM20_SCHMA 20 kDa calcium-binding protein OS=Schistosoma mansoni GN=SM20 PE=2 SV=2	5	57.938	0.644301	0.190911	-0.131174	1.09518	FALSE	18.8226272198103	19.5118821851285	18.9028495208197	18.9715229524992	19.3147255256492	19.3446327950846
G4LZ40	tr|G4LZ40|G4LZ40_SCHMA Rrp4, putative OS=Schistosoma mansoni GN=Smp_097250 PE=4 SV=1	3	14.649	0.112056	0.950566	2.76087	6.77807	FALSE	19.6028638261967	20.0315998530347	19.0838679357699	18.552401125322	13.3388459562242	18.5444607605027
G4LZ43	tr|G4LZ43|G4LZ43_SCHMA Uncharacterized protein OS=Schistosoma mansoni GN=Smp_129960 PE=4 SV=1	20	60.982	0.239026	0.621554	-1.47856	2.78671	FALSE	18.5292648277633	18.2552560879904	19.1083808103956	19.4438811872873	18.2422326613388	22.6424812272459
G4LZ44	tr|G4LZ44|G4LZ44_SCHMA Rna-binding protein 12 (Sh3/ww domain anchor protein in the nucleus) (Swan), putative OS=Schistosoma mansoni GN=Smp_129950.1 PE=4 SV=1	29	103.6	0.435272	0.361239	0.187141	1.13851	FALSE	21.2255360801169	20.829300747923	20.9604122344171	20.7888309124673	21.0451131219115	20.6198820071722
G4LZ47;G4LZ46	tr|G4LZ47|G4LZ47_SCHMA Uncharacterized protein OS=Schistosoma mansoni GN=Smp_164450.2 PE=4 SV=1;tr|G4LZ46|G4LZ46_SCHMA Uncharacterized protein OS=Schistosoma mansoni GN=Smp_164450.1 PE=4 SV=1	7	81.236	0.0925137	1.03379	-1.02726	2.03815	FALSE	18.0623559712093	18.3370883328595	18.7771215849876	20.4028594867453	19.3041539216802	18.5513234335596
G4LZ54	tr|G4LZ54|G4LZ54_SCHMA Syntaxin-12, putative OS=Schistosoma mansoni GN=Smp_125640 PE=4 SV=1	7	26.822	0.186426	0.729494	-0.818297	1.76332	FALSE	20.0724145502965	19.6423288951382	18.1162989360979	19.9906960095831	20.4573123727916	19.83792647808
G4LZ56	tr|G4LZ56|G4LZ56_SCHMA Heterogeneous nuclear ribonucleoprotein l (Hnrnp l), putative OS=Schistosoma mansoni GN=Smp_006440 PE=4 SV=1	13	76.414	0.501095	0.30008	0.186723	1.13818	FALSE	20.3421987606015	20.4558864656469	20.5204743061578	20.3764212205508	20.5709975017355	19.8109732610462
G4LZ58	tr|G4LZ58|G4LZ58_SCHMA Developmentally regulated GTP-binding protein-related OS=Schistosoma mansoni GN=Smp_125670 PE=4 SV=1	4	39.05	0.0383634	1.41608	2.07461	4.21231	FALSE	17.8518826298663	16.4642102708459	15.8709443321888	15.6991593495847	13.3388459562242	14.9252018009551
G4LZ61	tr|G4LZ61|G4LZ61_SCHMA Histidine triad (Hit) protein member, putative OS=Schistosoma mansoni GN=Smp_163300 PE=4 SV=1	5	40.619	0.0308488	1.51076	1.17785	2.26239	FALSE	18.6179445770034	18.1831097218386	17.3946577727999	17.3551371997363	16.9118827309772	16.395153138375
G4LZ67	tr|G4LZ67|G4LZ67_SCHMA Uncharacterized protein OS=Schistosoma mansoni GN=Smp_163260 PE=4 SV=1	3	42.151	0.0312668	1.50492	0.988189	1.98369	FALSE	17.8293841749646	17.5142988537173	17.4603217031099	16.9893334703794	15.9221613946711	16.9279433997741
G4LZ69	tr|G4LZ69|G4LZ69_SCHMA Proteasome subunit alpha type OS=Schistosoma mansoni GN=Smp_076230 PE=3 SV=1	10	29.736	0.248823	0.60411	-0.360399	1.28378	FALSE	22.5550117071639	23.0556657045574	23.2752129617861	23.4393233046979	23.5212280343777	23.0065360917962
G4LZ70	tr|G4LZ70|G4LZ70_SCHMA Cysteine desulfurylase, putative OS=Schistosoma mansoni GN=Smp_075470 PE=3 SV=1	16	49.463	0.000234876	3.62916	1.89758	3.72586	TRUE	22.24744709566	22.3884268415037	22.6919545116511	20.5968119372267	20.7562748725736	20.2820165976787
G4LZ71	tr|G4LZ71|G4LZ71_SCHMA Putative neutral sphingomyelinase OS=Schistosoma mansoni GN=Smp_162880 PE=4 SV=1	2	49.498	0.00531869	2.2742	-1.20286	2.30195	TRUE	13.2980158167032	13.5125371649315	13.7208770455038	14.6035080735732	15.1544247172807	14.3820675868579
G4LZ72	tr|G4LZ72|G4LZ72_SCHMA Programmed cell death protein, putative OS=Schistosoma mansoni GN=Smp_067490 PE=4 SV=1	3	22.995	0.752206	0.123663	0.163087	1.11968	FALSE	17.5382911035525	17.0375829776403	16.0573407848991	16.0866179333051	17.2682502762909	16.7890854840822
G4LZ73;G4LZ74;G4LZ75	tr|G4LZ73|G4LZ73_SCHMA Programmed cell death protein, putative OS=Schistosoma mansoni GN=Smp_067480.1 PE=4 SV=1;tr|G4LZ74|G4LZ74_SCHMA Programmed cell death protein, putative OS=Schistosoma mansoni GN=Smp_067480.3 PE=4 SV=1;tr|G4LZ75|G4LZ75_SCHMA Programme	4	15.854	0.0527553	1.27773	-0.755166	1.68783	FALSE	19.5580527187779	20.5249028029988	20.3931156079915	20.8945683072057	21.0401945630717	20.8068062441448
G4LZ80	tr|G4LZ80|G4LZ80_SCHMA Splicing factor 3b, subunit 4,putative OS=Schistosoma mansoni GN=Smp_067420 PE=4 SV=1	1	36.852	0.502	0.299296	0.304631	1.2351	FALSE	18.8064403486473	17.6147357134461	18.0034461039725	18.0992973526648	18.1892467963449	17.2221861061302
G4LZ82	tr|G4LZ82|G4LZ82_SCHMA Zinc binding dehydrogenase, putative OS=Schistosoma mansoni GN=Smp_067400 PE=4 SV=1	3	47.085	0.354234	0.450709	1.44357	2.71994	FALSE	18.1000006621762	18.2298273661994	18.2140500935998	18.1251565449824	13.3388459562242	18.7491514517246
G4LZ88	tr|G4LZ88|G4LZ88_SCHMA Pol-related OS=Schistosoma mansoni GN=Smp_158640 PE=4 SV=1	4	19.092	0.00558544	2.25294	2.3435	5.07531	TRUE	19.1153407547242	18.4296542142875	18.5884783085246	16.5024083990062	15.2921855950706	17.3083911206683
G4LZ93	tr|G4LZ93|G4LZ93_SCHMA Oligosaccharyl transferase, putative OS=Schistosoma mansoni GN=Smp_158600 PE=4 SV=1	10	87.94	0.0393627	1.40492	-1.71391	3.2805	FALSE	16.4974409847697	17.8077445724472	18.9220414398093	19.3870701807071	19.0408328439039	19.9410669126745
G4LZ98;G4LZ99	tr|G4LZ98|G4LZ98_SCHMA Nitrilase-related OS=Schistosoma mansoni GN=Smp_120080.1 PE=4 SV=1;tr|G4LZ99|G4LZ99_SCHMA Nitrilase-related OS=Schistosoma mansoni GN=Smp_120080.2 PE=4 SV=1	5	31.047	0.55906	0.252542	-0.317769	1.2464	FALSE	19.9210277824934	18.4041395220562	19.66859967649	19.6101706277766	20.2576416520257	19.0792615817922
G4LZA1;G4LZA0	tr|G4LZA1|G4LZA1_SCHMA Uncharacterized protein OS=Schistosoma mansoni GN=Smp_086030.1 PE=4 SV=1;tr|G4LZA0|G4LZA0_SCHMA Uncharacterized protein OS=Schistosoma mansoni GN=Smp_086030.2 PE=4 SV=1	2	32.872	0.00234159	2.63049	-2.56417	5.91416	TRUE	13.2980158167032	14.705695205349	13.7208770455038	16.5151264541808	17.0951223688319	15.8068618836134
G4LZA3	tr|G4LZA3|G4LZA3_SCHMA WD-repeat protein, putative OS=Schistosoma mansoni GN=Smp_168920 PE=4 SV=1	6	43.178	0.0630885	1.20005	1.52753	2.88292	FALSE	16.2788343579809	17.8444356354176	18.7952327456277	16.5864791197834	15.8234259348886	15.9260059128986
G4LZA6	tr|G4LZA6|G4LZA6_SCHMA Mitochondrial carrier protein-related OS=Schistosoma mansoni GN=Smp_194600 PE=3 SV=1	4	70.837	0.0802853	1.09536	1.09042	2.12936	FALSE	15.1567684046413	15.7429990607358	16.6214715402998	14.7907304207727	14.0416871431529	15.4175693002784
G4LZB1	tr|G4LZB1|G4LZB1_SCHMA Translocon-associated protein, gamma subunit,putative OS=Schistosoma mansoni GN=Smp_074700 PE=4 SV=1	1	20.323	9.4198e-07	6.02596	-6.80764	112.022	TRUE	13.2980158167032	13.5125371649315	13.7208770455038	20.2819939688877	19.8343200719647	20.8380311919281
G4LZB2	tr|G4LZB2|G4LZB2_SCHMA Cation efflux family protein OS=Schistosoma mansoni GN=Smp_162450 PE=4 SV=1	4	81.26	0.000495936	3.30457	-2.68097	6.41285	TRUE	13.2980158167032	13.5125371649315	13.7208770455038	16.969997839387	15.7388263504193	15.865503551522
G4LZB4	tr|G4LZB4|G4LZB4_SCHMA mRNA-export factor tap/nxf-related OS=Schistosoma mansoni GN=Smp_162430 PE=4 SV=1	5	77.13	0.893663	0.0488263	-0.0662963	1.04703	FALSE	17.0335850793867	17.0244967475985	16.9012492099682	17.1037397771668	16.1114256222677	17.9430543914693
G4LZC1	tr|G4LZC1|G4LZC1_SCHMA Isoamyl acetate-hydrolyzing esterase 1 OS=Schistosoma mansoni GN=Smp_162380 PE=4 SV=1	4	27.072	0.189184	0.723116	2.47521	5.56046	FALSE	17.805461556526	18.1313933207819	17.3442518744791	13.2833653882194	13.3388459562242	19.2332795113889
G4LZC4	tr|G4LZC4|G4LZC4_SCHMA Linker histone H1 OS=Schistosoma mansoni GN=Smp_162370 PE=3 SV=1	6	18.026	0.0971268	1.01266	-1.48761	2.80424	FALSE	23.5579206340865	22.5978624044431	23.1233882818882	24.3292970045692	23.2780137029351	26.1346873481933
G4LZD0	tr|G4LZD0|G4LZD0_SCHMA Citrate synthase OS=Schistosoma mansoni GN=Smp_204770 PE=3 SV=1	16	44.544	0.00298362	2.52526	-1.02636	2.03688	TRUE	24.1959000418662	24.2933061702038	24.2239926382717	25.3671979844625	25.4345263007726	24.9905511986197
G4LZD1	tr|G4LZD1|G4LZD1_SCHMA Uncharacterized protein Smp_204730 OS=Schistosoma mansoni GN=Smp_204730 PE=4 SV=1	3	79.115	0.297725	0.526185	-1.00583	2.0081	FALSE	15.0632049351606	15.3153609314128	13.7208770455038	16.4907275212433	16.7340021039619	13.8922124448689
G4LZD9	tr|G4LZD9|G4LZD9_SCHMA Uncharacterized protein OS=Schistosoma mansoni GN=Smp_094570 PE=4 SV=1	10	103.51	0.156842	0.804537	1.03245	2.0455	FALSE	16.3527169667902	15.9737223672276	18.0691242854664	15.7402844558624	15.1729336053883	16.3849832131964
G4LZE0	tr|G4LZE0|G4LZE0_SCHMA Rab11, putative OS=Schistosoma mansoni GN=Smp_173990 PE=4 SV=1	9	104.86	0.00879415	2.05581	-1.42036	2.67652	TRUE	18.562562751646	19.1432126269951	19.2289718684089	20.8873804103487	20.5281965708696	19.7802408992416
G4LZF6	tr|G4LZF6|G4LZF6_SCHMA Williams-beuren syndrome critical region protein, putative OS=Schistosoma mansoni GN=Smp_211190 PE=4 SV=1	4	22.994	1.86144e-05	4.73015	4.41124	21.2773	TRUE	17.3106402201142	18.4621395949951	17.7740195404747	13.2833653882194	13.3388459562242	13.6908642669623
G4LZG1	tr|G4LZG1|G4LZG1_SCHMA Short chain dehydrogenase,putative OS=Schistosoma mansoni GN=Smp_076580 PE=4 SV=1	11	38.391	0.015295	1.81545	-0.825297	1.7719	FALSE	20.4149885477821	20.7174211129154	20.5688520479706	21.6773179004533	21.4531487478501	21.0466862763771
G4LZG8	tr|G4LZG8|G4LZG8_SCHMA Regulator of chromosome condensation, putative OS=Schistosoma mansoni GN=Smp_076530 PE=4 SV=1	11	81.315	0.227182	0.643626	0.308252	1.23821	FALSE	19.7520806575623	19.5194532618086	19.6289821728968	19.2046806232572	19.6531682371727	19.117912426856
G4LZI0	tr|G4LZI0|G4LZI0_SCHMA Uncharacterized protein OS=Schistosoma mansoni GN=Smp_163330 PE=4 SV=1	4	29.759	0.0320698	1.4939	2.31345	4.97069	FALSE	15.3292340282821	17.0071785314394	17.213688621587	15.7005518932714	13.2183498845363	13.6908642669623
G4LZI4	tr|G4LZI4|G4LZI4_SCHMA Glycolipid transfer protein (Gltp), putative OS=Schistosoma mansoni GN=Smp_076390 PE=4 SV=1	2	25.86	1.70611e-05	4.76799	3.0347	8.19476	TRUE	16.3096615347879	16.7480878481056	16.3594287111888	13.2833653882194	13.3388459562242	13.6908642669623
G4LZI6	tr|G4LZI6|G4LZI6_SCHMA Uncharacterized protein OS=Schistosoma mansoni GN=Smp_150930 PE=4 SV=1	6	67.993	0.0546694	1.26226	1.08158	2.11636	FALSE	19.399386302702	19.047294663028	19.0851199892801	18.1449454979295	17.2294353362873	18.9126724565845
G4LZI9	tr|G4LZI9|G4LZI9_SCHMA Uncharacterized protein OS=Schistosoma mansoni GN=Smp_160560 PE=4 SV=1	16	79.512	0.0346773	1.45996	0.534375	1.44831	FALSE	21.7561851214962	21.6611150767858	21.5966682543107	21.1202780899568	21.3115897677066	20.9789765193837
G4LZJ2	tr|G4LZJ2|G4LZJ2_SCHMA Uncharacterized protein OS=Schistosoma mansoni GN=Smp_160540 PE=4 SV=1	1	16.325	0.143865	0.842045	-1.58129	2.99237	FALSE	16.2966752122798	19.6712212850836	19.5151061323701	19.9873381820385	20.2786167656066	19.9609157196629
G4LZJ5	tr|G4LZJ5|G4LZJ5_SCHMA Uncharacterized protein OS=Schistosoma mansoni GN=Smp_160530 PE=4 SV=1	3	56.341	0.278056	0.555868	1.02548	2.03564	FALSE	17.4961180181103	15.8324834816762	15.6420167523441	16.3652698084733	15.838035434764	13.6908642669623
G4LZJ7	tr|G4LZJ7|G4LZJ7_SCHMA Ankyrin repeat-containing, putative OS=Schistosoma mansoni GN=Smp_212250 PE=4 SV=1	4	36.558	0.00115213	2.9385	-3.80171	13.9453	TRUE	15.789313887338	16.037003881051	13.7208770455038	18.9894758854361	19.1122021693615	18.8506457969886
G4LZK0	tr|G4LZK0|G4LZK0_SCHMA Transaldolase OS=Schistosoma mansoni GN=Smp_070600 PE=4 SV=1	20	37.763	0.150278	0.823105	-0.453761	1.36961	FALSE	22.6572537542873	22.9213891263505	23.1186699464074	23.435594926758	23.6805212389318	22.9424798627946
G4LZK5	tr|G4LZK5|G4LZK5_SCHMA Tumor necrosis factor induced protein, putative OS=Schistosoma mansoni GN=Smp_124980 PE=4 SV=1	4	27.525	0.000700265	3.15474	4.84522	28.7447	TRUE	19.1606147761096	19.1098468654267	18.755928052317	13.2833653882194	13.3388459562242	15.868508500195
G4LZK7;G4LZK6	tr|G4LZK7|G4LZK7_SCHMA Acetolactate synthase OS=Schistosoma mansoni GN=Smp_005390.2 PE=4 SV=1;tr|G4LZK6|G4LZK6_SCHMA Acetolactate synthase OS=Schistosoma mansoni GN=Smp_005390.1 PE=4 SV=1	3	60.382	0.43616	0.360354	-0.578403	1.4932	FALSE	15.5607393369001	13.5125371649315	13.7208770455038	14.9920491400871	13.9600963820316	15.5772182786038
G4LZL3	tr|G4LZL3|G4LZL3_SCHMA Epa2p-like protein OS=Schistosoma mansoni GN=Smp_125040 PE=4 SV=1	8	87.001	0.0357047	1.44727	0.918397	1.89001	FALSE	17.5958301573261	16.5448217077622	17.2093438783441	15.9218929263293	16.484690812382	16.1882204354071
G4LZL5	tr|G4LZL5|G4LZL5_SCHMA Poly(A) polymerase, putative OS=Schistosoma mansoni GN=Smp_178850 PE=4 SV=1	8	56.947	0.0431202	1.36532	-3.1297	8.75251	FALSE	13.2980158167032	15.3784675241713	18.2615112523618	18.7338479966595	18.672332939353	18.9209016635215
G4LZM1	tr|G4LZM1|G4LZM1_SCHMA DEAD box ATP-dependent RNA helicase, putative OS=Schistosoma mansoni GN=Smp_096530 PE=4 SV=1	6	30.239	0.0164525	1.78377	-0.754773	1.68737	FALSE	20.4000201271806	20.2070943623823	20.6205538155624	21.1706254262607	21.3806835318551	20.9406768896819
G4LZN0;G4LZN1	tr|G4LZN0|G4LZN0_SCHMA Serpin, putative OS=Schistosoma mansoni GN=Smp_155560 PE=3 SV=1;tr|G4LZN1|G4LZN1_SCHMA Serpin, putative OS=Schistosoma mansoni GN=Smp_155550 PE=3 SV=1	6	43.592	0.193934	0.712347	-0.288757	1.22159	FALSE	19.3972026362383	19.720724965376	19.5658814041057	19.9049599130523	19.7254654220074	19.9196554284485
G4LZN2	tr|G4LZN2|G4LZN2_SCHMA Serpin, putative OS=Schistosoma mansoni GN=Smp_062120 PE=3 SV=1	4	43.886	0.00951402	2.02164	-1.15317	2.22402	TRUE	17.7697753375445	18.1426359718515	17.7420418858158	19.238061751928	18.5056370157878	19.3702589141818
G4LZN6	tr|G4LZN6|G4LZN6_SCHMA Serpin, putative OS=Schistosoma mansoni GN=Smp_062080 PE=3 SV=1	10	43.382	0.000380672	3.41945	-1.77195	3.41516	TRUE	19.7244542589635	20.0014387964239	19.6627634789979	21.8344519375979	21.6220077812101	21.2480601023368
G4LZN7;G4LZN8	tr|G4LZN7|G4LZN7_SCHMA Sulfide quinone reductase, putative OS=Schistosoma mansoni GN=Smp_062070.1 PE=4 SV=1;tr|G4LZN8|G4LZN8_SCHMA Sulfide quinone reductase, putative OS=Schistosoma mansoni GN=Smp_062070.2 PE=4 SV=1	14	50.922	0.100599	0.997408	-0.799967	1.74106	FALSE	19.3862642054191	20.0874744427881	20.3083355378374	21.0863915862799	20.0291884831152	21.0663946709402
G4LZP1;G4LZP2	tr|G4LZP1|G4LZP1_SCHMA Uncharacterized protein (Fragment) OS=Schistosoma mansoni GN=Smp_155510.2 PE=4 SV=1;tr|G4LZP2|G4LZP2_SCHMA Uncharacterized protein (Fragment) OS=Schistosoma mansoni GN=Smp_155510.1 PE=4 SV=1	1	22.436	0.457928	0.339203	0.197152	1.14643	FALSE	18.2684492406584	17.6105716879244	17.9254668269558	17.8661312511577	17.8007980204083	17.5461025772918
G4LZP4	tr|G4LZP4|G4LZP4_SCHMA Uncharacterized protein OS=Schistosoma mansoni GN=Smp_096840 PE=4 SV=1	1	15.585	0.78816	0.103385	0.0917156	1.06564	FALSE	17.7625492702436	18.8318516696561	18.6194626901525	18.2288195115821	18.286945556304	18.422951808022
G4LZQ3	tr|G4LZQ3|G4LZQ3_SCHMA Uncharacterized protein OS=Schistosoma mansoni GN=Smp_080670 PE=4 SV=1	4	15.527	0.102795	0.988029	-0.468241	1.38342	FALSE	18.6108314333201	18.9835983830892	18.9175355533195	19.0292445087977	19.2794870847328	19.6079570708728
G4LZQ9	tr|G4LZQ9|G4LZQ9_SCHMA Uncharacterized protein OS=Schistosoma mansoni GN=Smp_080620 PE=4 SV=1	12	94.436	0.899752	0.0458772	-0.0823786	1.05876	FALSE	18.6843098505831	19.3558671693363	19.4289795759905	19.4817452956405	17.9536855698171	20.2808615483462
G4LZR0	tr|G4LZR0|G4LZR0_SCHMA Uncharacterized protein OS=Schistosoma mansoni GN=Smp_080610 PE=4 SV=1	2	19.51	0.330467	0.480872	0.275392	1.21032	FALSE	19.2571364697951	19.0856255702384	19.0240015080499	19.0176201443996	19.1153147243192	18.4076526716391
G4LZT0	tr|G4LZT0|G4LZT0_SCHMA Uncharacterized protein OS=Schistosoma mansoni GN=Smp_174490 PE=4 SV=1	10	61.351	0.0213809	1.66997	-0.722524	1.65007	FALSE	20.7498390299864	21.1563410619177	21.3139672227124	21.9242180960017	21.6662487521812	21.7972515819464
G4LZU3	tr|G4LZU3|G4LZU3_SCHMA Polypyrimidine tract binding protein, putative OS=Schistosoma mansoni GN=Smp_138050.2 PE=4 SV=1	5	65.287	0.617836	0.209126	-0.355448	1.27938	FALSE	17.9440328205795	17.9891688479364	19.7264168770469	18.2855276498539	18.5016107376642	19.9388228391865
G4LZU4	tr|G4LZU4|G4LZU4_SCHMA Phosphatidylinositol transfer protein OS=Schistosoma mansoni GN=Smp_029310 PE=4 SV=1	4	27.48	0.00536633	2.27032	0.983186	1.97683	FALSE	20.1809642011969	20.7068951735683	20.4900773378786	19.3779917252745	19.6533860106802	19.3970022917494
G4LZU7	tr|G4LZU7|G4LZU7_SCHMA Uncharacterized protein OS=Schistosoma mansoni GN=Smp_138010 PE=4 SV=1	1	15.653	0.136851	0.863752	1.6629	3.16651	FALSE	17.6617226881542	17.8878641283851	17.2333174283359	16.957405761388	17.1459474500796	13.6908642669623
G4LZV4	tr|G4LZV4|G4LZV4_SCHMA Uncharacterized protein OS=Schistosoma mansoni GN=Smp_094920 PE=4 SV=1	10	36.371	0.188417	0.724879	0.306125	1.23638	FALSE	21.7356618079657	21.9612624337188	21.8195473967783	21.3012574131258	21.642356296732	21.6544821118584
G4LZY0	tr|G4LZY0|G4LZY0_SCHMA Cofilin OS=Schistosoma mansoni GN=Smp_195080 PE=3 SV=1	8	15.659	0.30035	0.522373	0.222432	1.1667	FALSE	23.9519856277709	23.9671435696616	23.8208088074157	23.5468301680525	23.6434301811036	23.882380888158
G4LZY3	tr|G4LZY3|G4LZY3_SCHMA Proteasome subunit alpha type OS=Schistosoma mansoni GN=Smp_067890 PE=3 SV=1	11	23.257	0.131306	0.881714	0.437629	1.35438	FALSE	23.8287602642292	23.7034983699825	23.3394727318464	23.3036524718837	23.3811493018153	22.8740432427901
G4LZY4	tr|G4LZY4|G4LZY4_SCHMA Cdc37-related OS=Schistosoma mansoni GN=Smp_067900 PE=4 SV=1	18	45.374	0.0282481	1.54901	-0.679754	1.60187	FALSE	23.7148126984645	23.4948370778526	23.3303495541629	23.9486086461679	24.1568723256561	24.4737810342505
G4LZY7	tr|G4LZY7|G4LZY7_SCHMA 28 kDa heat-and acid-stable phosphoprotein (PDGF-associated protein) (PAP) (PDGFA-associated protein 1) (PAP1), putative OS=Schistosoma mansoni GN=Smp_067930 PE=4 SV=1	4	22.55	0.481343	0.317545	0.914509	1.88493	FALSE	19.3371740048537	18.965588930261	17.2655275531066	18.9194476184302	18.8909491595172	15.0143669374365
G4LZZ5;G4LZZ6;G4LZZ4;G4LZZ7;G4LZZ8	tr|G4LZZ5|G4LZZ5_SCHMA Ubiquitin conjugating enzyme E2, putative OS=Schistosoma mansoni GN=Smp_067980.3 PE=3 SV=1;tr|G4LZZ6|G4LZZ6_SCHMA Ubiquitin conjugating enzyme E2, putative OS=Schistosoma mansoni GN=Smp_067980.4 PE=3 SV=1;tr|G4LZZ4|G4LZZ4_SCHMA Ubiqu	3	12.679	0.00451462	2.34538	1.2902	2.44563	TRUE	22.7683661240465	22.7266088117468	22.2550266936712	21.3920883359092	21.6152227707666	20.8720759252591
G4M000	tr|G4M000|G4M000_SCHMA Uncharacterized protein OS=Schistosoma mansoni GN=Smp_159000 PE=4 SV=1	2	166.88	0.0369972	1.43183	-0.935431	1.91246	FALSE	13.2980158167032	13.5125371649315	13.0309939139535	14.8658475771577	13.7659079198661	14.0160857370641
G4M005	tr|G4M005|G4M005_SCHMA Uncharacterized protein OS=Schistosoma mansoni GN=Smp_133310 PE=4 SV=1	3	14.03	0.0248204	1.60519	-3.52154	11.4839	FALSE	13.2980158167032	17.8338177221315	15.9617079324353	18.4685676512447	20.011317269938	19.1782798135504
G4M010	tr|G4M010|G4M010_SCHMA Low-density lipoprotein receptor (Ldl) OS=Schistosoma mansoni GN=Smp_020550 PE=4 SV=1	24	67.868	0.0119319	1.92329	-1.59485	3.02064	FALSE	21.116758231357	21.0914016726237	21.6972701004589	23.7413425332064	22.7208230942432	22.2278233924467
G4M012	tr|G4M012|G4M012_SCHMA Ccr4-not transcription complex, putative (Fragment) OS=Schistosoma mansoni GN=Smp_198980 PE=4 SV=1	1	90.335	0.732451	0.135222	0.394997	1.31494	FALSE	16.7746393723554	16.5406986576639	16.7447297597362	17.7540110359792	17.4302009778651	13.6908642669623
G4M014	tr|G4M014|G4M014_SCHMA Uncharacterized protein OS=Schistosoma mansoni GN=Smp_164500 PE=4 SV=1	4	56.055	0.427514	0.369049	0.265786	1.20229	FALSE	16.8185225207647	17.453369855075	16.8160433027809	16.3179682746865	16.9020191518671	17.0705894629036
G4M018	tr|G4M018|G4M018_SCHMA Titin, putative OS=Schistosoma mansoni GN=Smp_126240 PE=4 SV=1	32	674.28	0.685661	0.163891	-0.146057	1.10654	FALSE	16.1572427872085	16.4726010440143	16.4470158520565	16.6763704004471	15.847126716419	16.9915329545828
G4M023	tr|G4M023|G4M023_SCHMA Leukotriene A4 hydrolase (M01 family) OS=Schistosoma mansoni GN=Smp_007550 PE=4 SV=1	27	70.894	0.0835799	1.0779	-0.502953	1.41711	FALSE	22.2790811716899	22.2352015474891	22.297823084961	22.9220080480737	23.022354624055	22.3766021559229
G4M024	tr|G4M024|G4M024_SCHMA 3-5 exoribonuclease csl4-related OS=Schistosoma mansoni GN=Smp_007540 PE=4 SV=1	3	27.225	0.0681506	1.16653	1.75012	3.36387	FALSE	18.9170169513283	18.7822100216126	20.5237585507449	17.9999151869629	16.2663151477307	18.7063837180099
G4M028	tr|G4M028|G4M028_SCHMA DNA helicase OS=Schistosoma mansoni GN=Smp_094140 PE=3 SV=1	27	93.325	0.0268249	1.57146	-0.592729	1.5081	FALSE	19.6658959483419	19.8431200562646	19.8920466995115	20.2198818909714	20.5740682918604	20.3852985281809
G4M039	tr|G4M039|G4M039_SCHMA Neutral alpha-glucosidase ab (Glucosidase II alpha subunit) (Alpha glucosidase 2),putative OS=Schistosoma mansoni GN=Smp_018760 PE=3 SV=1	27	113.28	0.00398882	2.39916	-1.05401	2.07629	TRUE	20.5128411312471	20.5173232754833	20.8434979801695	21.5488506166496	21.9612549318164	21.5255743763186
G4M046	tr|G4M046|G4M046_SCHMA Subfamily S1B unassigned peptidase (S01 family) OS=Schistosoma mansoni GN=Smp_211270 PE=4 SV=1	11	60.909	0.0175731	1.75515	-1.04136	2.05817	FALSE	19.9911833289539	20.7910223022553	20.9082207480252	21.6164745796255	21.8341039540644	21.3639312942098
G4M047	tr|G4M047|G4M047_SCHMA V-type proton ATPase subunit C OS=Schistosoma mansoni GN=Smp_211280 PE=3 SV=1	4	38.16	0.417041	0.379822	-0.442796	1.35924	FALSE	18.1900269228202	18.7191142751998	18.3605611078435	19.1362982421522	19.6553082503222	17.8064852053034
G4M048	tr|G4M048|G4M048_SCHMA Subfamily S1B unassigned peptidase (S01 family) OS=Schistosoma mansoni GN=Smp_211260 PE=4 SV=1	4	31.039	0.703807	0.152546	-0.178309	1.13156	FALSE	16.4703441903289	17.6882961704314	17.783468119005	17.7040571369759	17.7902080578159	16.9827700925422
G4M051;G4M050	tr|G4M051|G4M051_SCHMA 40S ribosomal protein S3a OS=Schistosoma mansoni GN=Smp_073880.1 PE=3 SV=1;tr|G4M050|G4M050_SCHMA 40S ribosomal protein S3a OS=Schistosoma mansoni GN=Smp_073880.2 PE=3 SV=1	17	29.287	0.293849	0.531875	0.797667	1.73829	FALSE	23.6876941903677	23.8163650550195	24.0874235630556	23.2102907843047	21.6228420840906	24.3653487120814
G4M055	tr|G4M055|G4M055_SCHMA Rac-alpha serine/threonine-protein kinase (Ec 2.7.1.37) (Rac-pk-alpha)(Akt1 kinase) (Protein kinase b) (Pkb) (C-akt) (Thymoma viral proto-oncogene) OS=Schistosoma mansoni GN=Smp_073930.2 PE=4 SV=1	4	88.665	0.846754	0.0722428	-0.122253	1.08843	FALSE	17.7085493293966	17.2576990382593	16.975930514372	18.0529364843375	18.1442955878229	16.1117066825336
G4M057	tr|G4M057|G4M057_SCHMA WD-repeat protein, putative OS=Schistosoma mansoni GN=Smp_073940 PE=4 SV=1	20	68.776	0.00480744	2.31809	-1.21761	2.32561	TRUE	20.3519066059914	20.689810050897	21.0934120706724	21.851845206058	22.2007596700202	21.7353545398557
G4M060	tr|G4M060|G4M060_SCHMA Uncharacterized protein OS=Schistosoma mansoni GN=Smp_211140 PE=3 SV=1	3	28.244	0.101062	0.995411	1.01327	2.01848	FALSE	16.6490010195027	18.0475770485988	18.30203017842	17.2157313971124	16.4758357274622	16.2672394338802
G4M062	tr|G4M062|G4M062_SCHMA Uncharacterized protein OS=Schistosoma mansoni GN=Smp_074000 PE=4 SV=1	8	33.879	0.0982877	1.0075	-0.441148	1.35768	FALSE	20.9448815955093	20.5604165291808	20.5277625006973	21.0756037819373	21.3213307752808	20.9595688450271
G4M074	tr|G4M074|G4M074_SCHMA Protein kiaa0174, putative OS=Schistosoma mansoni GN=Smp_057650 PE=4 SV=1	3	37.631	0.488441	0.311188	-0.147348	1.10753	FALSE	19.0850091193574	18.8489497313784	18.8195473967783	19.2311098185312	19.0087663350164	18.9556750850041
G4M078	tr|G4M078|G4M078_SCHMA Biotin-protein ligase OS=Schistosoma mansoni GN=Smp_153150 PE=4 SV=1	1	71.921	0.0324952	1.48818	-1.64013	3.11695	FALSE	13.2980158167032	13.5125371649315	15.3234518346821	15.8127154061901	15.2947193852456	15.9469745494792
G4M088	tr|G4M088|G4M088_SCHMA Phosphatidylserine receptor, putative OS=Schistosoma mansoni GN=Smp_137240 PE=4 SV=1	2	88.113	0.00480097	2.31867	2.04841	4.1365	TRUE	15.9951261300744	14.4907185649707	15.9724592127014	13.2833653882194	13.3388459562242	13.6908642669623
G4M090	tr|G4M090|G4M090_SCHMA Kif21, putative OS=Schistosoma mansoni GN=Smp_137230 PE=3 SV=1	4	155.5	0.000693433	3.159	-1.59073	3.01201	TRUE	13.2980158167032	13.0775125484994	13.7208770455038	15.0994934089211	14.8428810625011	14.9262108109475
G4M091	tr|G4M091|G4M091_SCHMA Uncharacterized protein OS=Schistosoma mansoni GN=Smp_027750 PE=4 SV=1	1	45.96	1.36956e-05	4.86342	-3.33524	10.0927	TRUE	13.2980158167032	13.5125371649315	13.7208770455038	17.1392353259046	16.5417844976109	16.8561366540111
G4M097	tr|G4M097|G4M097_SCHMA Frataxin homolog, mitochondrial,putative OS=Schistosoma mansoni GN=Smp_137190 PE=4 SV=1	3	18.594	0.490672	0.309209	0.430573	1.34777	FALSE	18.6211340853499	17.3260835476989	16.9516853765207	17.6272690461045	17.6612220920466	16.3186933318611
G4M099;G4M0A0	tr|G4M099|G4M099_SCHMA Programmed cell death, putative OS=Schistosoma mansoni GN=Smp_072110.2 PE=4 SV=1;tr|G4M0A0|G4M0A0_SCHMA Programmed cell death, putative OS=Schistosoma mansoni GN=Smp_072110.1 PE=4 SV=1	14	57.138	0.124903	0.903426	1.54612	2.92031	FALSE	20.9040029280792	21.109650175634	21.3533322733227	20.0102794923369	17.6578974088518	21.0604385717652
G4M0A1	tr|G4M0A1|G4M0A1_SCHMA Ccr4-not transcription complex, putative OS=Schistosoma mansoni GN=Smp_072100 PE=4 SV=1	2	26.865	0.000756106	3.12142	-3.47235	11.0989	TRUE	13.2980158167032	13.5125371649315	15.1082706198962	17.8776085992077	17.2125878675535	17.2456782065178
G4M0A7	tr|G4M0A7|G4M0A7_SCHMA Xap-5 protein-related OS=Schistosoma mansoni GN=Smp_161290 PE=4 SV=1	3	44.779	0.247569	0.606304	0.983724	1.97756	FALSE	16.3765189724788	15.2743251349482	16.8830124524889	15.7672665485177	16.1245547027334	13.6908642669623
G4M0B9;G4M0B8	tr|G4M0B9|G4M0B9_SCHMA Cle7, putative OS=Schistosoma mansoni GN=Smp_071960.1 PE=4 SV=1;tr|G4M0B8|G4M0B8_SCHMA Cle7, putative OS=Schistosoma mansoni GN=Smp_071960.2 PE=4 SV=1	13	27.86	0.00307124	2.51269	1.26282	2.39965	TRUE	22.4214932483943	22.3807300111025	21.9771023257597	21.1581910417184	21.2001076325212	20.6325545943196
G4M0D7	tr|G4M0D7|G4M0D7_SCHMA Uncharacterized protein OS=Schistosoma mansoni GN=Smp_104450 PE=4 SV=1	5	42.388	1.34075e-05	4.87265	-5.73315	53.1926	TRUE	13.2980158167032	13.5125371649315	13.7208770455038	19.481774220697	18.3791920566739	19.8699266966235
G4M0E0;G4M0D9	tr|G4M0E0|G4M0E0_SCHMA Lysine--tRNA ligase OS=Schistosoma mansoni GN=Smp_104470.1 PE=3 SV=1;tr|G4M0D9|G4M0D9_SCHMA Lysine--tRNA ligase OS=Schistosoma mansoni GN=Smp_104470.2 PE=4 SV=1	28	71.517	0.0208455	1.68099	0.66199	1.58226	FALSE	22.8695885076426	22.8877673509657	22.7309969404432	22.1533868881733	22.4075871459864	21.9414080963206
G4M0F3	tr|G4M0F3|G4M0F3_SCHMA Sap18, putative OS=Schistosoma mansoni GN=Smp_085480 PE=4 SV=1	7	26.52	0.0140352	1.85278	1.01344	2.01872	FALSE	19.7028262341259	20.0180398540441	20.3248861777236	18.9720790114927	18.6410482772867	19.3923036508974
G4M0F5	tr|G4M0F5|G4M0F5_SCHMA Elongator complex protein 3 OS=Schistosoma mansoni GN=Smp_085500 PE=3 SV=1	12	64.051	0.000276378	3.5585	2.34495	5.08043	TRUE	19.6957843603336	19.8321646300046	19.8997257706371	17.8656436520119	16.9070202557275	17.6201621267608
G4M0F7;Q15ET5	tr|G4M0F7|G4M0F7_SCHMA Vacuolar ATP synthase subunit e, putative OS=Schistosoma mansoni GN=Smp_085520 PE=3 SV=1;tr|Q15ET5|Q15ET5_SCHMA Vacuolar ATP synthase subunit E-like protein OS=Schistosoma mansoni PE=2 SV=1	7	26.581	0.0196172	1.70736	-0.63451	1.55241	FALSE	18.7523808173741	18.8795246612472	19.0996366848048	19.657672658369	19.4651489571129	19.5122498616313
G4M0F8	tr|G4M0F8|G4M0F8_SCHMA Synapse-associated protein, putative OS=Schistosoma mansoni GN=Smp_085530 PE=4 SV=1	7	44.472	0.0139408	1.85571	1.33582	2.52418	FALSE	19.2985484150946	18.944156477719	18.8806311788897	18.137657386647	16.9263725920593	18.0518598902083
G4M0G4;G4M0G3;G4M0G1;G4M0G2;G4M0F9;G4M0G0	tr|G4M0G4|G4M0G4_SCHMA Myosin heavy chain, putative OS=Schistosoma mansoni GN=Smp_085540.6 PE=3 SV=1;tr|G4M0G3|G4M0G3_SCHMA Myosin heavy chain OS=Schistosoma mansoni GN=Smp_085540.3 PE=3 SV=1;tr|G4M0G1|G4M0G1_SCHMA Myosin heavy chain, putative OS=Schistoso	98	222.18	0.199185	0.700742	-0.41016	1.32883	FALSE	22.4745179921617	23.0378963425834	22.6637286307792	23.0111314825548	22.8463792310982	23.5491119948409
G4M0I0	tr|G4M0I0|G4M0I0_SCHMA Uncharacterized protein OS=Schistosoma mansoni GN=Smp_166000 PE=4 SV=1	6	35.709	0.263673	0.578934	-1.5261	2.88007	FALSE	13.535288615391	17.4719279025863	17.5356167164744	18.0184578421782	18.6123597893288	16.4903249075564
G4M0I1	tr|G4M0I1|G4M0I1_SCHMA Ankyrin repeat-containing, putative OS=Schistosoma mansoni GN=Smp_166010 PE=4 SV=1	23	141.94	0.142683	0.845627	-0.357391	1.28111	FALSE	19.8714657187653	19.9031520129683	19.8748703157135	20.3468715800929	20.4200400637489	19.9547482877457
G4M0I3	tr|G4M0I3|G4M0I3_SCHMA Erythrocyte membrane protein, putative OS=Schistosoma mansoni GN=Smp_166030 PE=4 SV=1	19	227.53	0.393263	0.405317	0.408525	1.32733	FALSE	18.3143982192198	18.8891825219425	19.1352224226143	17.9916916794091	17.90146919293	19.2200664318169
G4M0I4	tr|G4M0I4|G4M0I4_SCHMA Uncharacterized protein OS=Schistosoma mansoni GN=Smp_081370 PE=4 SV=1	4	18.691	0.170489	0.768304	-0.282193	1.21604	FALSE	20.8276102481931	20.7963786599974	20.7542513542308	20.9702761897421	21.0837346769106	21.1708082377414
G4M0I5	tr|G4M0I5|G4M0I5_SCHMA Tumor protein d52, putative OS=Schistosoma mansoni GN=Smp_081380 PE=4 SV=1	6	28.296	0.0142407	1.84647	0.625844	1.54311	FALSE	20.0218842450941	19.9092390441989	20.0709380859378	19.4490388093962	19.3691724597588	19.3063187933454
G4M0J4	tr|G4M0J4|G4M0J4_SCHMA Alpha-mannosidase OS=Schistosoma mansoni GN=Smp_143430 PE=3 SV=1	5	140.68	0.103052	0.986943	-0.887498	1.84996	FALSE	14.720400020648	15.5143285721266	16.3078896963594	16.1215373087406	16.2373985359175	16.8461755439609
G4M0K4;G4M0K5	tr|G4M0K4|G4M0K4_SCHMA 60S ribosomal protein L10, putative OS=Schistosoma mansoni GN=Smp_013200.2 PE=4 SV=1;tr|G4M0K5|G4M0K5_SCHMA 60S ribosomal protein L10, putative OS=Schistosoma mansoni GN=Smp_013200.1 PE=4 SV=1	10	25.112	0.0204727	1.68883	1.07945	2.11323	FALSE	25.1691812160515	24.908461901336	24.7180998390381	23.8600049126178	23.2805272504106	24.4168638767253
G4M0L0	tr|G4M0L0|G4M0L0_SCHMA Poly [ADP-ribose] polymerase OS=Schistosoma mansoni GN=Smp_129260 PE=4 SV=1	21	109.31	0.00147048	2.83254	-1.46777	2.76595	TRUE	18.2161085757227	18.7591338728014	18.9849960800504	20.0461259215131	20.1574322383561	20.1600011702266
G4M0L1	tr|G4M0L1|G4M0L1_SCHMA Riboflavin kinase/fmn adenylyltransferase,putative OS=Schistosoma mansoni GN=Smp_013150 PE=4 SV=1	1	17.682	0.165447	0.78134	1.3144	2.48699	FALSE	16.4784955375273	16.8260571061027	16.4344757018827	16.1308635794777	13.3388459562242	16.3261181919893
G4M0L4	tr|G4M0L4|G4M0L4_SCHMA Uncharacterized protein OS=Schistosoma mansoni GN=Smp_129240 PE=4 SV=1	5	40.44	0.0472326	1.32576	2.04381	4.12333	FALSE	18.1911174468318	16.9476819656367	16.9745088597034	16.6151368806699	15.6758747017371	13.6908642669623
G4M0L7	tr|G4M0L7|G4M0L7_SCHMA Tyrosine--tRNA ligase OS=Schistosoma mansoni GN=Smp_129210 PE=3 SV=1	18	116.06	0.573422	0.241525	-0.281688	1.21562	FALSE	17.3637122647357	18.304076775921	18.0059533226326	18.0908264583636	17.4394070951889	18.9885738883957
G4M0M2	tr|G4M0M2|G4M0M2_SCHMA Uncharacterized protein OS=Schistosoma mansoni GN=Smp_174850 PE=4 SV=1	3	20.086	0.602644	0.219939	0.168192	1.12365	FALSE	19.8159489315124	19.8554599200546	19.4429250049364	19.8041216637467	19.8144789853079	18.9911563406352
G4M0M6;G4M0M5;G4M0M7	tr|G4M0M6|G4M0M6_SCHMA Adenosylhomocysteinase OS=Schistosoma mansoni GN=Smp_096020.3 PE=3 SV=1;tr|G4M0M5|G4M0M5_SCHMA Adenosylhomocysteinase OS=Schistosoma mansoni GN=Smp_096020.2 PE=3 SV=1;tr|G4M0M7|G4M0M7_SCHMA Adenosylhomocysteinase,putative OS=Schistos	3	57.558	0.0405206	1.39232	-0.560948	1.47524	FALSE	18.131016748889	17.6582181399718	17.8757654237179	18.3447420936188	18.5610107447051	18.4420914934445
G4M0M8	tr|G4M0M8|G4M0M8_SCHMA DNAj homolog subfamily A member, putative OS=Schistosoma mansoni GN=Smp_096010 PE=3 SV=1	14	50.224	0.00173037	2.76186	1.59502	3.02098	TRUE	20.6733775297113	20.5629329106289	20.8006180417432	18.7217751643589	18.9138231415467	19.6162843380954
G4M0N4	tr|G4M0N4|G4M0N4_SCHMA Protein phosphatase inhibitor, putative OS=Schistosoma mansoni GN=Smp_097560 PE=4 SV=1	2	17.502	0.0982429	1.0077	-0.629525	1.54706	FALSE	19.5936411923394	19.9792718130532	18.8924984357768	20.0346373244887	20.223580630758	20.0957680258996
G4M0N7	tr|G4M0N7|G4M0N7_SCHMA Valine-tRNA ligase OS=Schistosoma mansoni GN=Smp_097590 PE=3 SV=1	31	134.76	0.865641	0.062662	-0.258058	1.19587	FALSE	16.7848242530252	18.9766858063499	19.4654165702326	19.0402850429241	15.8454757012004	21.115340023287
G4M0N8	tr|G4M0N8|G4M0N8_SCHMA Uncharacterized protein OS=Schistosoma mansoni GN=Smp_175810 PE=4 SV=1	4	28.607	0.11166	0.952102	0.689839	1.6131	FALSE	20.0026224459062	19.5567238907334	18.8144708310268	19.1061810449841	18.6994777459959	18.4986421668185
G4M0P7;G4M0P8;G4M0P6	tr|G4M0P7|G4M0P7_SCHMA Cell division control protein 48 aaa family protein (Transitional endoplasmic reticulum atpase),putative OS=Schistosoma mansoni GN=Smp_018240.3 PE=3 SV=1;tr|G4M0P8|G4M0P8_SCHMA Cell division control protein 48 aaa family protein (Tra	41	88.808	0.108085	0.966234	-0.434769	1.35169	FALSE	23.5334928510833	23.4739779017638	23.5377390687507	23.9234063633637	23.6537851767529	24.2723240663339
G4M0Q4	tr|G4M0Q4|G4M0Q4_SCHMA CCAAT-binding transcription factor, putative OS=Schistosoma mansoni GN=Smp_176340 PE=4 SV=1	2	57.147	0.154898	0.809953	0.439843	1.35646	FALSE	20.5982984129168	20.4288464287726	19.9886451496645	20.1064624640898	20.0235836002268	19.5662163608159
G4M0Q5	tr|G4M0Q5|G4M0Q5_SCHMA Uncharacterized protein OS=Schistosoma mansoni GN=Smp_098590 PE=4 SV=1	6	13.281	0.58644	0.231776	0.136573	1.09929	FALSE	21.4512391102419	21.9480532927037	21.6187348144819	21.567061811755	21.7434606386757	21.2977864235068
G4M0S9;G4M0T0	tr|G4M0S9|G4M0S9_SCHMA Poly [ADP-ribose] polymerase OS=Schistosoma mansoni GN=Smp_145810.1 PE=4 SV=1;tr|G4M0T0|G4M0T0_SCHMA Poly [ADP-ribose] polymerase, putative OS=Schistosoma mansoni GN=Smp_145810.2 PE=4 SV=1	8	61.626	0.0782796	1.10635	0.862441	1.81811	FALSE	16.9019105792828	17.7376886299642	17.6716734458117	17.0067257824937	16.827677684905	15.8895475311609
G4M0T5;G4M0T4	tr|G4M0T5|G4M0T5_SCHMA Synaptosomal associated protein, putative OS=Schistosoma mansoni GN=Smp_043940.1 PE=4 SV=1;tr|G4M0T4|G4M0T4_SCHMA Synaptosomal associated protein, putative OS=Schistosoma mansoni GN=Smp_043940.2 PE=4 SV=1	8	26.757	0.00100311	2.99865	-1.12291	2.17786	TRUE	19.1283506532401	19.2455545999721	19.0540601588002	20.3563682356075	20.1891967297127	20.2511302536384
G4M0T7	tr|G4M0T7|G4M0T7_SCHMA DNAj homolog subfamily C member, putative OS=Schistosoma mansoni GN=Smp_043970 PE=4 SV=1	3	28.46	0.041668	1.3802	0.78061	1.71786	FALSE	20.6788540453635	20.7614362586709	20.1419188424292	19.7591274051079	20.1216771685689	19.3595758421992
G4M0U2	tr|G4M0U2|G4M0U2_SCHMA Synbindin, putative OS=Schistosoma mansoni GN=Smp_028940 PE=4 SV=1	4	26.998	0.00234154	2.6305	-3.79912	13.9203	TRUE	15.7073874707501	13.5125371649315	13.7208770455038	17.3073008687049	19.0244818460592	18.0063683809783
G4M0U3	tr|G4M0U3|G4M0U3_SCHMA Thioredoxin domain containing protein 9-related OS=Schistosoma mansoni GN=Smp_028930 PE=4 SV=1	5	27.241	0.000344465	3.46285	-1.89332	3.7149	TRUE	17.2232557704395	17.79715750047	17.8392864120252	19.3541421341172	19.6827544514571	19.5027696739231
G4M0V2	tr|G4M0V2|G4M0V2_SCHMA Transgelin OS=Schistosoma mansoni GN=Smp_086330.1 PE=3 SV=1	9	21.204	0.226671	0.644603	0.602917	1.51878	FALSE	21.1492972711372	21.6299532295246	20.5082448946149	20.4033940303685	19.8990223913414	21.1763265120286
G4M0V3	tr|G4M0V3|G4M0V3_SCHMA Uncharacterized protein OS=Schistosoma mansoni GN=Smp_199070 PE=4 SV=1	13	88.106	0.202694	0.693159	-0.568899	1.48339	FALSE	17.2982954216629	17.7166625769418	18.1961695984879	18.4764277066254	17.6498431115818	18.7915531471343
G4M0V9	tr|G4M0V9|G4M0V9_SCHMA SH3 domain-binding glutamic acid-rich-like protein OS=Schistosoma mansoni GN=Smp_033330 PE=3 SV=1	2	11.926	0.512318	0.290461	1.04869	2.06866	FALSE	17.1810671172968	19.1244496865293	17.7030008268846	19.3895698775466	17.7819984911231	13.6908642669623
G4M0W1	tr|G4M0W1|G4M0W1_SCHMA Katanin p60 ATPase-containing subunit A-like 2 OS=Schistosoma mansoni GN=KATNAL2 PE=3 SV=1	1	54.874	0.696359	0.157167	-0.121505	1.08787	FALSE	21.8676449099953	20.9995160425749	21.0268162557451	21.5108735628453	21.3503332040326	21.3972865666352
G4M0W7;G4M0W8	tr|G4M0W7|G4M0W7_SCHMA Family C48 unassigned peptidase (C48 family) OS=Schistosoma mansoni GN=Smp_033260.2 PE=4 SV=1;tr|G4M0W8|G4M0W8_SCHMA Family C48 unassigned peptidase (C48 family) OS=Schistosoma mansoni GN=Smp_033260.1 PE=4 SV=1	4	64.713	0.0348519	1.45777	1.11557	2.16681	FALSE	16.8839661922223	16.3580628949792	16.8857982511645	16.3939570075381	15.0806854155937	15.3064671317104
G4M0X1	tr|G4M0X1|G4M0X1_SCHMA Serine/threonine kinase OS=Schistosoma mansoni GN=Smp_180400 PE=4 SV=1	5	63.984	0.0282307	1.54928	1.98387	3.95553	FALSE	16.3857165891511	16.3232534536786	16.133739297978	15.8613901248004	13.3388459562242	13.6908642669623
G4M0X2	tr|G4M0X2|G4M0X2_SCHMA Ubiquilin 1,2, putative OS=Schistosoma mansoni GN=Smp_010290 PE=4 SV=1	9	58.648	0.288436	0.53995	0.471118	1.38618	FALSE	22.6062720432286	22.9156872870703	22.0995388672345	22.5813050734454	22.2691742379715	21.357663450377
G4M0X4	tr|G4M0X4|G4M0X4_SCHMA Uncharacterized protein OS=Schistosoma mansoni GN=Smp_127620 PE=4 SV=1	9	229.63	0.758247	0.120189	0.432414	1.34949	FALSE	17.1966256102154	13.723491152956	13.4403248612566	13.2833653882194	13.3388459562242	16.4409888527298
G4M0Y0	tr|G4M0Y0|G4M0Y0_SCHMA GMP synthetase (Glutamine-hydrolysing) OS=Schistosoma mansoni GN=Smp_063830 PE=4 SV=1	30	81.371	0.00587288	2.23115	0.813948	1.75802	FALSE	22.4940829680458	22.5845891158227	22.5811643086039	21.9117389512629	21.7213858100286	21.5848685055773
G4M0Y2	tr|G4M0Y2|G4M0Y2_SCHMA Uncharacterized protein OS=Schistosoma mansoni GN=Smp_156570 PE=4 SV=1	3	22.447	0.00844278	2.07351	3.14676	8.85664	TRUE	16.4892411318247	17.2872181251793	18.0699233042937	13.2833653882194	13.3388459562242	15.7838939605902
G4M0Y5;G4M0Y6	tr|G4M0Y5|G4M0Y5_SCHMA Ubiquitin-conjugating enzyme E2 j2, putative OS=Schistosoma mansoni GN=Smp_059750.1 PE=3 SV=1;tr|G4M0Y6|G4M0Y6_SCHMA Ubiquitin-conjugating enzyme E2 j2, putative OS=Schistosoma mansoni GN=Smp_059750.2 PE=3 SV=1	1	25.358	0.070127	1.15411	2.25614	4.77712	FALSE	18.5656667370685	18.3229056640384	18.0917902457342	17.0459107384207	17.4751624188555	13.6908642669623
G4M0Y8	tr|G4M0Y8|G4M0Y8_SCHMA Uncharacterized protein OS=Schistosoma mansoni GN=Smp_154330 PE=4 SV=1	5	28.589	0.23733	0.624647	0.519396	1.43335	FALSE	19.4863512534237	18.226384610763	19.0620470001548	18.5855642334076	18.6435717827864	17.9874603117921
G4M0Z5	tr|G4M0Z5|G4M0Z5_SCHMA Zinc finger protein, putative OS=Schistosoma mansoni GN=Smp_095680 PE=4 SV=1	5	22.695	0.0452015	1.34485	1.16578	2.24354	FALSE	20.3461203371512	20.482808740172	19.5034964717484	19.0929299132792	19.5641028426382	18.1780647488985
G4M0Z7	tr|G4M0Z7|G4M0Z7_SCHMA Uncharacterized protein OS=Schistosoma mansoni GN=Smp_174620 PE=4 SV=1	3	18.249	0.856959	0.0670401	-0.220405	1.16506	FALSE	18.1078896004608	17.1182059330309	13.7208770455038	17.0637978663396	16.8090319321076	15.7353567885311
G4M103	tr|G4M103|G4M103_SCHMA Vesicular integral-membrane protein vip36 (Mannose-binding lectin 2)-related OS=Schistosoma mansoni GN=Smp_174580 PE=4 SV=1	9	34.881	0.574687	0.240568	-0.10974	1.07903	FALSE	21.4332060819304	21.3391555247051	21.3083355378374	21.606162724935	21.3916575560155	21.412097708326
G4M115	tr|G4M115|G4M115_SCHMA Uncharacterized protein OS=Schistosoma mansoni GN=Smp_212230 PE=4 SV=1	4	30.062	0.317881	0.497736	0.288951	1.22175	FALSE	20.6369516966827	20.4406227954267	20.465745470346	20.340425815306	20.5578732289147	19.7781686096562
G4M120;G4M121	tr|G4M120|G4M120_SCHMA Uncharacterized protein OS=Schistosoma mansoni GN=Smp_176260.1 PE=4 SV=1;tr|G4M121|G4M121_SCHMA Uncharacterized protein OS=Schistosoma mansoni GN=Smp_176260.2 PE=4 SV=1	1	21.905	0.00378289	2.42218	5.138	35.2122	TRUE	20.3788507984736	20.0383323557961	16.7649857080769	13.2833653882194	13.3388459562242	15.1459440519934
G4M126;G4M127	tr|G4M126|G4M126_SCHMA Eukaryotic translation initiation factor 3 subunit E OS=Schistosoma mansoni GN=Smp_176230.1 PE=3 SV=1;tr|G4M127|G4M127_SCHMA Eukaryotic translation initiation factor 3 subunit E OS=Schistosoma mansoni GN=Smp_176230.2 PE=3 SV=1	15	51.923	0.141828	0.848237	0.479676	1.39443	FALSE	20.9747732387105	21.1223186292961	21.4047078387828	20.7934410046996	21.0333779015298	20.2359521712944
G4M133	tr|G4M133|G4M133_SCHMA Surfeit locus protein, putative OS=Schistosoma mansoni GN=Smp_174450 PE=4 SV=1	1	31.513	0.0146357	1.83459	-2.92396	7.58927	FALSE	13.2980158167032	16.5285967678354	15.9809802642336	18.2653712384192	18.1133899529321	18.2007176111195
G4M144	tr|G4M144|G4M144_SCHMA Tho2 protein, putative OS=Schistosoma mansoni GN=Smp_086460 PE=4 SV=1	13	194.1	0.671248	0.173117	-0.560461	1.47474	FALSE	12.5085587569105	15.5151010359739	15.9199822969257	15.3774103713455	13.3388459562242	16.9087695110984
G4M145;G4M146	tr|G4M145|G4M145_SCHMA Islet cell autoantigen, putative OS=Schistosoma mansoni GN=Smp_126770.1 PE=4 SV=1;tr|G4M146|G4M146_SCHMA Islet cell autoantigen, putative OS=Schistosoma mansoni GN=Smp_126770.2 PE=4 SV=1	3	58.071	0.00314593	2.50225	-1.09384	2.13441	TRUE	16.4744704077019	16.4119849911666	16.661549228538	17.6572885372109	17.3183695939504	17.8538599667228
G4M149;G4M148;G4M150	tr|G4M149|G4M149_SCHMA tRNA pseudouridine synthase OS=Schistosoma mansoni GN=Smp_086450.2 PE=3 SV=1;tr|G4M148|G4M148_SCHMA tRNA pseudouridine synthase OS=Schistosoma mansoni GN=Smp_086450.1 PE=3 SV=1;tr|G4M150|G4M150_SCHMA tRNA pseudouridine synthase OS=Sc	11	47.246	0.00342947	2.46477	2.3294	5.02597	TRUE	19.4738040604175	19.4428104435162	19.7592962536774	18.1506695453525	17.2539603908316	16.2830784269398
G4M152	tr|G4M152|G4M152_SCHMA Uncharacterized protein OS=Schistosoma mansoni GN=Smp_199120 PE=4 SV=1	2	69.466	0.00245655	2.60968	1.77724	3.4277	TRUE	14.3131967242173	15.457749798649	15.1159250155558	13.2833653882194	13.3388459562242	12.9329404859168
G4M165	tr|G4M165|G4M165_SCHMA Uncharacterized protein OS=Schistosoma mansoni GN=Smp_054610 PE=4 SV=1	6	135.66	0.0231414	1.63561	1.84444	3.59114	FALSE	15.5325810230275	14.5170600502179	16.1155638968438	12.6165833860872	13.6374639035152	14.3778328920597
G4M170	tr|G4M170|G4M170_SCHMA Meiotic checkpoint regulator cut4, putative OS=Schistosoma mansoni GN=Smp_151380 PE=4 SV=1	17	300.42	0.59322	0.226784	0.568044	1.48251	FALSE	14.6468764157484	14.2589411347982	15.2350757406083	13.0976222480092	12.8866146001286	16.4525247615301
G4M179	tr|G4M179|G4M179_SCHMA WD-repeat protein, putative OS=Schistosoma mansoni GN=Smp_104870 PE=4 SV=1	7	46.495	0.647905	0.188489	0.240399	1.18132	FALSE	17.7101667540191	18.2121186614271	18.8372151181161	17.7089086999176	17.4149540514644	18.9144412326251
G4M183	tr|G4M183|G4M183_SCHMA Proteasome subunit alpha type OS=Schistosoma mansoni GN=Smp_070930 PE=3 SV=1	10	27.774	0.999024	0.000424171	-0.000271118	1.00019	FALSE	23.5047094005478	23.5219958636763	23.4444341170984	23.5807312829037	23.6865190558859	23.2047023974528
G4M184	tr|G4M184|G4M184_SCHMA SLAP, putative (Fragment) OS=Schistosoma mansoni GN=Smp_070920.1 PE=4 SV=1	16	81.29	0.0798058	1.09797	-0.428236	1.34559	FALSE	18.5098397787794	18.8590185339915	18.716798450763	19.0353272555206	19.0660261914649	19.2690113857353
G4M190	tr|G4M190|G4M190_SCHMA Ras suppressor protein 1, rsu1, putative OS=Schistosoma mansoni GN=Smp_114090 PE=4 SV=1	3	26.083	0.0278672	1.55491	-0.869246	1.82671	FALSE	16.8481542876124	17.802704107303	17.1060131040609	18.2159400750676	18.0113455883379	18.1373244384527
G4M193	tr|G4M193|G4M193_SCHMA Sulfhydryl oxidase OS=Schistosoma mansoni GN=Smp_098710 PE=4 SV=1	4	47.815	0.0837835	1.07684	0.577563	1.49233	FALSE	18.0494860374592	18.3586009592068	18.2440359097532	17.9821538387775	17.1685724022529	17.7687074187261
G4M196	tr|G4M196|G4M196_SCHMA Transducin beta-like OS=Schistosoma mansoni GN=Smp_098760 PE=4 SV=1	5	74.49	0.0811387	1.09077	-0.458585	1.37419	FALSE	18.014260420424	18.3839102485245	17.9910551685833	18.4347210934332	18.7593469156836	18.5709115039308
G4M1B3	tr|G4M1B3|G4M1B3_SCHMA Uncharacterized protein OS=Schistosoma mansoni GN=Smp_036930 PE=4 SV=1	8	66.438	0.177934	0.749742	-1.17043	2.25078	FALSE	15.9312327490862	17.5084174353373	18.5938122672346	18.9820106990546	18.9417885730988	17.6209413038482
G4M1B6	tr|G4M1B6|G4M1B6_SCHMA Uncharacterized protein OS=Schistosoma mansoni GN=Smp_036950 PE=4 SV=1	11	74.215	0.023184	1.63481	-1.26509	2.40343	FALSE	16.2911681063557	17.3896727578259	17.5618873404696	18.2687279059197	18.0263327136995	18.7429463021979
G4M1B8	tr|G4M1B8|G4M1B8_SCHMA Dynein heavy chain, putative OS=Schistosoma mansoni GN=Smp_159840 PE=4 SV=1	2	432.99	0.0125508	1.90133	-1.2066	2.30794	FALSE	14.1662265449126	13.5121277546757	13.944412997153	14.5852735009839	15.5930762058733	15.0642300331447
G4M1D1	tr|G4M1D1|G4M1D1_SCHMA Zinc finger Ran-binding domain-containing protein 2 OS=Schistosoma mansoni GN=Smp_082560.1 PE=3 SV=1	7	31.808	0.423434	0.373214	0.182125	1.13455	FALSE	20.2190518967138	20.1455888960776	19.7646114953176	19.9181656975394	19.8813128313238	19.7833981397716
G4M1E0	tr|G4M1E0|G4M1E0_SCHMA Ribonuclease pH related OS=Schistosoma mansoni GN=Smp_056900 PE=4 SV=1	2	26.769	0.12537	0.901805	1.91698	3.77632	FALSE	18.4460098577401	18.3628982639523	17.1584156005681	17.0243875792571	17.5011268283212	13.6908642669623
G4M1E1	tr|G4M1E1|G4M1E1_SCHMA Nitrilase-related OS=Schistosoma mansoni GN=Smp_056890.1 PE=4 SV=1	19	64.055	0.63559	0.196823	-0.0969938	1.06954	FALSE	21.0662058136215	21.2727427113171	21.1306663552953	21.1285228780966	21.4200400637489	21.2120332424512
G4M1E3	tr|G4M1E3|G4M1E3_SCHMA Radical sam proteins, putative OS=Schistosoma mansoni GN=Smp_152690 PE=4 SV=1	6	90.883	0.342248	0.46566	0.452643	1.36855	FALSE	17.0650054676132	17.4739158233557	17.6788493063752	17.7985822345769	16.2739079482549	16.7873512669712
G4M1E4	tr|G4M1E4|G4M1E4_SCHMA Snf5, putative OS=Schistosoma mansoni GN=Smp_056860 PE=4 SV=1	3	50.203	0.302295	0.519569	-1.51067	2.84942	FALSE	13.2980158167032	17.7463176699192	18.2479834166671	18.0308862165559	18.2786402946497	17.5147936273474
G4M1F3;Q15ER7	tr|G4M1F3|G4M1F3_SCHMA 60S ribosomal protein L14, putative OS=Schistosoma mansoni GN=Smp_175740.1 PE=4 SV=1;tr|Q15ER7|Q15ER7_SCHMA 60S ribosomal protein L14, putative OS=Schistosoma mansoni GN=Smp_175740.2 PE=2 SV=1	10	15.181	0.200562	0.697752	0.494443	1.40878	FALSE	23.9384782123604	23.9684999642058	24.1588889815512	23.7268483023165	22.8500850823882	24.0056041182232
G4M1F9	tr|G4M1F9|G4M1F9_SCHMA Upstream transcription factor 1, usf1, putative OS=Schistosoma mansoni GN=Smp_170530 PE=4 SV=1	3	97.047	0.0153728	1.81325	-1.01052	2.01463	FALSE	15.7998965324065	15.9447520083711	15.1539511454612	16.7606063340338	16.3290424205827	16.8405002350813
G4M1G1	tr|G4M1G1|G4M1G1_SCHMA Tip120, putative OS=Schistosoma mansoni GN=Smp_170510 PE=4 SV=1	25	145.66	0.0938434	1.0276	1.04327	2.06089	FALSE	18.8314837860914	19.1841608658129	19.1897514974764	17.9014611075136	17.0915909398277	19.0825355889083
G4M1G4	tr|G4M1G4|G4M1G4_SCHMA Dynein heavy chain, putative OS=Schistosoma mansoni GN=Smp_156080 PE=4 SV=1	2	441.08	0.00497856	2.3029	3.72382	13.2124	TRUE	17.0445169336688	16.9724465930842	17.8189138021081	12.0170135071779	13.3388459562242	15.308548314531
G4M1G7	tr|G4M1G7|G4M1G7_SCHMA Growth factor receptor-bound protein, putative OS=Schistosoma mansoni GN=Smp_062950 PE=4 SV=1	7	27.04	0.0415827	1.38109	-1.05665	2.08009	FALSE	18.7144868430901	18.5668246484786	17.6502853917621	18.9189349867534	19.9031031790306	19.2795051103259
G4M1H5	tr|G4M1H5|G4M1H5_SCHMA Calcium-transporting ATPase OS=Schistosoma mansoni GN=Smp_199210 PE=3 SV=1	26	105.07	0.00250664	2.60091	-1.92304	3.7922	TRUE	18.7360354542602	19.4445074910353	20.0335049547083	21.527607286727	21.0379027515637	21.4176435722051
G4M1I0;G4M1H9	tr|G4M1I0|G4M1I0_SCHMA O-acyltransferase (Membrane bound) domain containing protein, putative OS=Schistosoma mansoni GN=Smp_079860.1 PE=3 SV=1;tr|G4M1H9|G4M1H9_SCHMA O-acyltransferase (Membrane bound) domain containing protein, putative OS=Schistosoma mans	3	52.159	0.0666783	1.17602	-2.45969	5.50099	FALSE	13.2980158167032	16.321284367307	17.6358784553794	17.9027579509888	18.3436460488799	18.387847181741
G4M1J2	tr|G4M1J2|G4M1J2_SCHMA Formin-like OS=Schistosoma mansoni GN=Smp_144430 PE=4 SV=1	14	117.96	0.00200901	2.69702	-1.34001	2.53154	TRUE	17.5288335932537	17.8920444451997	17.475678265905	19.2595963087639	18.6517700744108	19.0052311601546
G4M1J4	tr|G4M1J4|G4M1J4_SCHMA Apobec-1 complementation factor-related OS=Schistosoma mansoni GN=Smp_144450 PE=4 SV=1	7	84.394	2.32972e-05	4.6327	-5.27061	38.6021	TRUE	13.2980158167032	13.5125371649315	13.7208770455038	18.9859112846723	19.4463361769494	17.911001058397
G4M1K0	tr|G4M1K0|G4M1K0_SCHMA Dynamin-associated protein, putative OS=Schistosoma mansoni GN=Smp_135790 PE=4 SV=1	5	180.9	0.179094	0.746919	-0.422746	1.34048	FALSE	13.5929451784226	13.9948137404862	13.8443543869537	13.7712479684647	14.44626076623	14.4828436956768
G4M1K4	tr|G4M1K4|G4M1K4_SCHMA Uncharacterized protein OS=Schistosoma mansoni GN=Smp_212060 PE=4 SV=1	11	74.404	0.117202	0.931065	0.546203	1.46024	FALSE	19.3130840327425	19.5071486726423	19.4909973843865	18.8037746256884	18.4499763368991	19.4188692073488
G4M1K6	tr|G4M1K6|G4M1K6_SCHMA Pyridoxamine 5-phosphate oxidase OS=Schistosoma mansoni GN=Smp_051550.1 PE=3 SV=1	10	28.877	0.0183664	1.73598	0.890349	1.85362	FALSE	22.8467666463701	22.4411358231583	22.3226531192673	21.7397560331194	21.9357433991067	21.2640085741584
G4M1K9	tr|G4M1K9|G4M1K9_SCHMA Acetyltransferase component of pyruvate dehydrogenase complex OS=Schistosoma mansoni GN=Smp_212190 PE=3 SV=1	12	54.382	0.129408	0.88804	-0.39554	1.31543	FALSE	21.3774892783523	21.3395748975625	21.4653027027214	21.8255905652871	22.0585704571804	21.4848246477448
G4M1L2	tr|G4M1L2|G4M1L2_SCHMA Phosphatidylinositol-binding clathrin assembly protein, putative OS=Schistosoma mansoni GN=Smp_152550 PE=4 SV=1	3	73.837	0.292854	0.533349	-0.673138	1.59454	FALSE	15.4114430155246	15.0771102241038	15.636669643227	17.1762397469763	16.0340136293505	14.9343829615707
G4M1N3	tr|G4M1N3|G4M1N3_SCHMA Chromatin-specific transcription elongation factor 140 kDa subunit (M24 family) OS=Schistosoma mansoni GN=Smp_212210 PE=4 SV=1	6	24.425	0.219414	0.658735	-0.538123	1.45208	FALSE	19.6122823119472	19.2704241045804	20.3132644631677	20.0461259215131	19.9224174253181	20.8417958375458
G4M1N4	tr|G4M1N4|G4M1N4_SCHMA Chromatin-specific transcription elongation factor 140 kDa subunit (M24 family) OS=Schistosoma mansoni GN=Smp_212220 PE=4 SV=1	16	82.227	0.0834823	1.07841	-0.768397	1.70338	FALSE	19.4470372557395	19.5303318368898	20.6408610876144	20.5708737853934	20.5853356742243	20.767212488951
G4M1N6	tr|G4M1N6|G4M1N6_SCHMA Tropomyosin, putative OS=Schistosoma mansoni GN=Smp_022170 PE=4 SV=1	5	28.423	0.00338656	2.47024	-1.05392	2.07617	TRUE	19.55236212875	19.5879288323314	19.1892000436731	20.5913263981429	20.6098558559548	20.2900761530647
G4M1Q3	tr|G4M1Q3|G4M1Q3_SCHMA Aspartyl-tRNA synthetase, putative (Fragment) OS=Schistosoma mansoni GN=Smp_199340 PE=4 SV=1	5	55.234	0.678479	0.168463	0.0945355	1.06772	FALSE	18.5692883698736	18.6190950437289	18.8257498276091	18.4959497966296	18.8423017193088	18.3922751275819
G4M1S7	tr|G4M1S7|G4M1S7_SCHMA Myosin regulatory light chain 2 smooth muscle,putative OS=Schistosoma mansoni GN=Smp_199400 PE=4 SV=1	3	19.593	0.106765	0.97157	-0.971753	1.96122	FALSE	18.7780544237188	17.8596034736042	16.975930514372	19.2920743944802	18.7894816751275	18.4472901027574
G4M1T7	tr|G4M1T7|G4M1T7_SCHMA 26S proteasome non-ATPase regulatory subunit,putative OS=Schistosoma mansoni GN=Smp_047740 PE=4 SV=1	15	30.945	0.809115	0.0919899	0.0557453	1.0394	FALSE	22.6163281473148	22.5190830552269	22.3382469705685	22.5605377100326	22.5953591199379	22.1505255481624
G4M1U8;G4M1U7	tr|G4M1U8|G4M1U8_SCHMA Voltage-dependent anion-selective channel,putative OS=Schistosoma mansoni GN=Smp_091240.1 PE=4 SV=1;tr|G4M1U7|G4M1U7_SCHMA Voltage-dependent anion-selective channel,putative OS=Schistosoma mansoni GN=Smp_091240.2 PE=4 SV=1	21	31.332	0.00500489	2.30061	-1.00912	2.01269	TRUE	25.0452167489247	25.3489136075285	25.4719693483094	26.2106453318935	26.5522760864826	26.1305522109471
G4M1V2	tr|G4M1V2|G4M1V2_SCHMA Uncharacterized protein OS=Schistosoma mansoni GN=Smp_199500 PE=4 SV=1	5	15.868	0.0574237	1.24091	1.65463	3.14842	FALSE	20.3650717446098	18.3244742948373	20.0421660345074	18.4073891931114	16.9007967360671	18.4596473092774
G4M1X2	tr|G4M1X2|G4M1X2_SCHMA Lanc-like protein (Fragment) OS=Schistosoma mansoni GN=Smp_118820 PE=4 SV=1	4	11.962	0.298891	0.524486	-0.23345	1.17564	FALSE	20.9431633190813	20.8702952237189	20.7208315889413	21.1012002344369	21.2633600213589	20.8700803191812
G4M1X6;G4M1X7;C4QU84	tr|G4M1X6|G4M1X6_SCHMA Uncharacterized protein OS=Schistosoma mansoni GN=Smp_120640.3 PE=4 SV=1;tr|G4M1X7|G4M1X7_SCHMA Uncharacterized protein OS=Schistosoma mansoni GN=Smp_120640.2 PE=4 SV=1;tr|C4QU84|C4QU84_SCHMA Uncharacterized protein OS=Schistosoma ma	3	59.958	0.0282177	1.54948	0.611152	1.52748	FALSE	19.1169196277036	18.8919300772072	18.8345924269476	18.1334656405373	18.3461180723907	18.5304034421145
G4M201	tr|G4M201|G4M201_SCHMA Stromal cell-derived factor 2-like protein OS=Schistosoma mansoni GN=Smp_199700 PE=4 SV=1	4	17.584	0.0137379	1.86208	-0.813108	1.75699	FALSE	21.683523063546	21.8012966183906	21.7178077928193	22.7025283638082	22.7583433134354	22.181080995554
G4M204	tr|G4M204|G4M204_SCHMA Cytochrome C oxidase assembly protein cox15,putative OS=Schistosoma mansoni GN=Smp_199730 PE=4 SV=1	2	20.717	0.128459	0.891236	-2.79041	6.91828	FALSE	13.2980158167032	13.5125371649315	19.0133104863846	18.1852911423671	17.7167389984378	18.293073548915
G4M209	tr|G4M209|G4M209_SCHMA Steroid dehydrogenase, putative OS=Schistosoma mansoni GN=Smp_009430 PE=3 SV=1	7	35.749	0.389755	0.409209	-1.07585	2.10797	FALSE	16.3715975109443	15.9787065200428	17.4366662379469	16.5889517897087	16.158419714586	20.2671616668511
G4M212	tr|G4M212|G4M212_SCHMA Peter pan-related OS=Schistosoma mansoni GN=Smp_212500 PE=4 SV=1	7	89.282	0.25296	0.596949	-0.898952	1.86471	FALSE	15.2006922154849	14.5824150327663	16.6446113834713	17.3127745149924	15.3949498312833	16.4168516084856
G4M238	tr|G4M238|G4M238_SCHMA 6-phosphogluconate dehydrogenase,putative OS=Schistosoma mansoni GN=Smp_199860 PE=4 SV=1	2	17.565	0.0111343	1.95334	0.956118	1.94008	FALSE	22.5218079058229	21.8303082295966	22.0950484288594	21.3832118470594	21.2200931243488	20.9755061581095
G4M276	tr|G4M276|G4M276_SCHMA Uncharacterized protein OS=Schistosoma mansoni GN=Smp_206010 PE=4 SV=1	6	34.816	0.118711	0.92551	0.540856	1.45484	FALSE	21.7167367065392	21.2299517857029	21.3512113165816	20.942014191529	21.293597427933	20.4397197731941
G4M293	tr|G4M293|G4M293_SCHMA Uncharacterized protein OS=Schistosoma mansoni GN=Smp_206160 PE=4 SV=1	5	17.189	0.153118	0.814974	2.46166	5.50849	FALSE	18.7700490331297	18.9197107405845	20.103771557143	18.3398674196071	13.3388459562242	18.7298460212501
G4M2A8	tr|G4M2A8|G4M2A8_SCHMA Uncharacterized protein OS=Schistosoma mansoni GN=Smp_206290 PE=4 SV=1	2	16.617	1.93955e-05	4.7123	5.53563	46.3863	TRUE	18.1796256233808	18.9572508894015	19.7830824286561	13.2833653882194	13.3388459562242	13.6908642669623
G4V597	tr|G4V597|G4V597_SCHMA Putative flap endonuclease-1 OS=Schistosoma mansoni GN=Smp_186980 PE=4 SV=1	2	15.164	0.574256	0.240895	-0.33843	1.26438	FALSE	20.5609555266806	20.5192681703925	18.8652558174682	20.602343213531	20.7037073168087	19.6547199252671
G4V5A6	tr|G4V5A6|G4V5A6_SCHMA Uncharacterized protein OS=Schistosoma mansoni GN=Smp_160450 PE=4 SV=1	10	137.61	0.0126754	1.89704	2.57816	5.97178	FALSE	17.4442387331778	16.8352458975072	17.2892790028794	14.3005737852128	13.3653356144139	16.1683701629652
G4V5B0	tr|G4V5B0|G4V5B0_SCHMA rRNA processing protein ebna1-binding protein-related OS=Schistosoma mansoni GN=Smp_160420 PE=4 SV=1	4	15.649	0.0795328	1.09945	3.56232	11.8131	FALSE	18.7514108451639	18.2220695810563	19.543835853895	13.2833653882194	13.3388459562242	19.2081415974338
G4V5D9	tr|G4V5D9|G4V5D9_SCHMA Defective in cullin neddylation protein OS=Schistosoma mansoni GN=Smp_105330 PE=4 SV=1	4	31.045	0.248802	0.604145	-0.40212	1.32145	FALSE	19.4610337772203	19.6025568884554	18.89426637548	19.758650007671	20.0964043846517	19.3091618112955
G4V5E4	tr|G4V5E4|G4V5E4_SCHMA Uncharacterized protein OS=Schistosoma mansoni GN=Smp_181050 PE=4 SV=1	33	117.03	0.000360506	3.44309	2.34001	5.06306	TRUE	20.8969191343121	20.6147876877852	20.6657395862614	18.3387180398249	17.886416984206	18.9322854081317
G4V5E6	tr|G4V5E6|G4V5E6_SCHMA Fragile X related 2, frx2 OS=Schistosoma mansoni GN=Smp_016050 PE=4 SV=1	28	86.547	0.40487	0.392685	-0.313848	1.24302	FALSE	21.8890130755429	21.447399571846	21.8369119908633	22.1840872694245	21.3954055939609	22.5353746161067
G4V5F5;G4V5F4;G4V5F6	tr|G4V5F5|G4V5F5_SCHMA Putative flotillin-1 OS=Schistosoma mansoni GN=Smp_016200.3 PE=4 SV=1;tr|G4V5F4|G4V5F4_SCHMA Putative flotillin-1 OS=Schistosoma mansoni GN=Smp_016200.1 PE=4 SV=1;tr|G4V5F6|G4V5F6_SCHMA Putative flotillin-1 OS=Schistosoma mansoni GN=	9	46.559	0.13122	0.881998	-0.775344	1.7116	FALSE	17.9365745018917	18.9250579499817	18.8283886284632	19.7234885790982	19.6985283384496	18.5940367192078
G4V5F8	tr|G4V5F8|G4V5F8_SCHMA Putative cyclin k OS=Schistosoma mansoni GN=Smp_130980 PE=3 SV=1	2	44.285	0.0231202	1.63601	2.3995	5.27622	FALSE	17.2802185332769	16.3926181573799	16.6878993562134	16.1325152897645	13.3388459562242	13.6908642669623
G4V5F9	tr|G4V5F9|G4V5F9_SCHMA Putative cyclins OS=Schistosoma mansoni GN=Smp_130970 PE=3 SV=1	6	59.121	0.00962282	2.0167	2.34954	5.09661	TRUE	15.4890859687654	14.7494266825374	17.1231797964693	13.2833653882194	13.3388459562242	13.6908642669623
G4V5G0	tr|G4V5G0|G4V5G0_SCHMA Uncharacterized protein OS=Schistosoma mansoni GN=Smp_130960 PE=4 SV=1	12	90.783	0.000112985	3.94698	-3.89803	14.9081	TRUE	13.4634919736577	14.7501334900324	13.7208770455038	17.4658503529659	18.306556027263	17.856178015088
G4V5G6;G4V5G5	tr|G4V5G6|G4V5G6_SCHMA Putative transcription factor IWS1 OS=Schistosoma mansoni GN=Smp_008500.2 PE=4 SV=1;tr|G4V5G5|G4V5G5_SCHMA Putative transcription factor IWS1 OS=Schistosoma mansoni GN=Smp_008500.1 PE=4 SV=1	4	71.321	0.653122	0.185006	-0.314221	1.24334	FALSE	17.1487360749652	16.3139616316171	18.1270878920933	17.9726760214141	18.1700952499798	16.3896771423998
G4V5G7	tr|G4V5G7|G4V5G7_SCHMA Glycogenin-related OS=Schistosoma mansoni GN=Smp_008490 PE=4 SV=1	12	36.51	0.0206092	1.68594	-0.988663	1.98434	FALSE	20.4010513392171	21.2072092678056	20.2984268791006	21.7859640681635	21.378654308867	21.7080575778413
G4V5G8	tr|G4V5G8|G4V5G8_SCHMA Uncharacterized protein OS=Schistosoma mansoni GN=Smp_126720 PE=4 SV=1	3	55.879	0.861779	0.0646042	0.073356	1.05216	FALSE	17.803056247617	16.597866786664	17.6091014410208	17.7143349681794	17.0874062575144	16.9882153728032
G4V5G9;G4V5H0	tr|G4V5G9|G4V5G9_SCHMA Putative erythroblast macrophage protein emp OS=Schistosoma mansoni GN=Smp_008470.1 PE=4 SV=1;tr|G4V5H0|G4V5H0_SCHMA Putative erythroblast macrophage protein emp OS=Schistosoma mansoni GN=Smp_008470.2 PE=4 SV=1	2	45.167	0.260144	0.584787	-1.06242	2.08844	FALSE	16.6696073590173	16.3134322743024	13.7208770455038	16.3549477163342	17.3673371806278	16.1689030635312
G4V5H1	tr|G4V5H1|G4V5H1_SCHMA Uncharacterized protein OS=Schistosoma mansoni GN=Smp_008430 PE=4 SV=1	3	26.23	0.00947768	2.0233	1.16426	2.24118	TRUE	19.4794219626725	18.8881508381857	18.5508164957362	17.5708465926946	17.8245222812768	18.0302468947848
G4V5I0	tr|G4V5I0|G4V5I0_SCHMA Uncharacterized protein OS=Schistosoma mansoni GN=Smp_152740 PE=4 SV=1	3	85.172	0.00638247	2.19501	2.45696	5.49058	TRUE	15.9359241265664	16.4878610386074	17.4802936097036	15.0787759363207	13.3388459562242	14.1155819209674
G4V5I6	tr|G4V5I6|G4V5I6_SCHMA Putative cyclin OS=Schistosoma mansoni GN=Smp_152760 PE=4 SV=1	11	35.532	0.0194636	1.71078	0.787063	1.72556	FALSE	21.6021466281643	21.6971511913856	21.5483938334694	20.7639521778097	21.2116146093734	20.5109368882599
G4V5I7	tr|G4V5I7|G4V5I7_SCHMA Uncharacterized protein OS=Schistosoma mansoni GN=Smp_056990 PE=4 SV=1	2	43.221	0.00859184	2.06591	-2.39599	5.26337	TRUE	13.2980158167032	15.3614204437229	14.9142988916551	17.5767083465325	16.6339221032302	16.5510679491266
G4V5J1	tr|G4V5J1|G4V5J1_SCHMA Uncharacterized protein OS=Schistosoma mansoni GN=Smp_057060 PE=4 SV=1	9	52.713	0.00610676	2.21419	-4.46825	22.1349	TRUE	13.2980158167032	13.5125371649315	17.1281751498504	19.3373439683603	18.7354085572179	19.2707346186009
G4V5J2	tr|G4V5J2|G4V5J2_SCHMA Ras-related GTP binding rag A,B/gtr1 OS=Schistosoma mansoni GN=Smp_152790 PE=4 SV=1	3	35.384	0.0340727	1.46759	-1.52187	2.87163	FALSE	14.1779351823616	16.2935697212705	15.6284489309751	16.8090867242123	17.0240327930508	16.8324498349824
G4V5J3;G4V5J4	tr|G4V5J3|G4V5J3_SCHMA Putative chromosome region maintenance protein 5/exportin OS=Schistosoma mansoni GN=Smp_152800.1 PE=4 SV=1;tr|G4V5J4|G4V5J4_SCHMA Putative chromosome region maintenance protein 5/exportin OS=Schistosoma mansoni GN=Smp_152800.2 PE=4 S	13	145.89	0.440419	0.356134	-1.02799	2.03918	FALSE	14.1446608610165	14.4921678422673	13.7208770455038	13.1378850099804	14.3181315209283	17.985646551418
G4V5K8	tr|G4V5K8|G4V5K8_SCHMA Uncharacterized protein OS=Schistosoma mansoni GN=Smp_152860 PE=4 SV=1	9	91.487	0.012918	1.8888	-0.697468	1.62166	FALSE	18.1482448491762	18.4114983905471	18.2106124472884	18.7979318697226	19.0030529089712	19.0617752353941
G4V5L4	tr|G4V5L4|G4V5L4_SCHMA Putative chaperonin containing t-complex protein 1, zeta subunit, tcpz OS=Schistosoma mansoni GN=Smp_004990 PE=3 SV=1	25	59.885	0.458178	0.338966	0.158456	1.11609	FALSE	23.9233059007362	24.1471170002939	24.1915690361432	24.0384278686361	23.9888960818518	23.7592998884626
G4V5L5	tr|G4V5L5|G4V5L5_SCHMA Uncharacterized protein OS=Schistosoma mansoni GN=Smp_005000 PE=4 SV=1	3	28.081	0.340327	0.468104	0.544259	1.45827	FALSE	19.6199451725237	19.6566034086098	18.7173510202063	19.1991145345541	19.3861100006263	17.7758965796847
G4V5L6	tr|G4V5L6|G4V5L6_SCHMA Putative 50s ribosomal protein L20 OS=Schistosoma mansoni GN=Smp_004980 PE=4 SV=1	4	18.804	0.111351	0.953308	1.16702	2.24548	FALSE	19.4621916951361	18.9180549701861	18.2145921318607	18.1041156258183	16.4812926977465	18.5083599890583
G4V5M0;G4V5L9	tr|G4V5M0|G4V5M0_SCHMA Putative chromosome region maintenance protein 1/exportin OS=Schistosoma mansoni GN=Smp_124820.1 PE=4 SV=1;tr|G4V5L9|G4V5L9_SCHMA Putative chromosome region maintenance protein 1/exportin OS=Schistosoma mansoni GN=Smp_124820.2 PE=4 S	19	94.869	0.243513	0.613479	-0.26544	1.202	FALSE	20.7125894960589	20.7906389432222	20.9907035918688	20.9122756082794	21.2632411195547	21.1147351015802
G4V5M1	tr|G4V5M1|G4V5M1_SCHMA Putative 60s ribosomal protein L35 OS=Schistosoma mansoni GN=Smp_004940 PE=3 SV=1	1	14.882	9.74825e-06	5.01107	4.64126	24.955	TRUE	18.6763009249181	17.7022556244582	17.8582965714492	13.2833653882194	13.3388459562242	13.6908642669623
G4V5M2	tr|G4V5M2|G4V5M2_SCHMA Uncharacterized protein OS=Schistosoma mansoni GN=Smp_005060.1 PE=4 SV=1	4	17.028	0.00447236	2.34946	-0.969893	1.9587	FALSE	22.0963946834034	22.1159983077948	22.1950637489569	23.070275661242	23.3830655953202	22.8637940563337
G4V5M6;G4V5M5;G4V5M7	tr|G4V5M6|G4V5M6_SCHMA Putative nucleolar protein nol1/nop2 OS=Schistosoma mansoni GN=Smp_005080.3 PE=3 SV=1;tr|G4V5M5|G4V5M5_SCHMA Putative nucleolar protein nol1/nop2 OS=Schistosoma mansoni GN=Smp_005080.2 PE=3 SV=1;tr|G4V5M7|G4V5M7_SCHMA Putative nucleo	12	54.225	0.228664	0.640802	1.7359	3.33088	FALSE	16.3676241038516	15.746722473609	17.3986915044803	13.2833653882194	13.3388459562242	17.683116550071
G4V5P4;G4V5P5	tr|G4V5P4|G4V5P4_SCHMA Putative 60S ribosomal protein L23 OS=Schistosoma mansoni GN=Smp_007900.2 PE=3 SV=1;tr|G4V5P5|G4V5P5_SCHMA Putative 60S ribosomal protein L23 OS=Schistosoma mansoni GN=Smp_007900.1 PE=3 SV=1	5	12.537	0.00404696	2.39287	0.967272	1.95514	FALSE	24.0695683352309	24.0081977880792	23.8691867712104	23.026951894957	22.7832470050132	23.2349385751611
G4V5Q1	tr|G4V5Q1|G4V5Q1_SCHMA Putative nadh-plastoquinone oxidoreductase OS=Schistosoma mansoni GN=Smp_092490.1 PE=3 SV=1	4	23.406	0.461024	0.336276	0.160381	1.11758	FALSE	20.7584858875382	20.5381175818564	20.7611732456816	20.7124997209523	20.5146752448562	20.3494596384363
G4V5Q4	tr|G4V5Q4|G4V5Q4_SCHMA Eukaryotic translation initiation factor 3 subunit A OS=Schistosoma mansoni GN=Smp_001170 PE=3 SV=1	39	121.72	0.0091346	2.03931	1.32182	2.49981	TRUE	21.2629660078627	21.0414290997614	21.1486631142479	19.5240302680937	19.4344946218512	20.5290809510389
G4V5Q8	tr|G4V5Q8|G4V5Q8_SCHMA Uncharacterized protein OS=Schistosoma mansoni GN=Smp_001120 PE=4 SV=1	5	22.449	0.000682281	3.16604	1.26251	2.39913	TRUE	20.028381591183	20.1050942279641	20.0556408997568	18.9318870130677	18.8566844372124	18.6130081515011
G4V5R0	tr|G4V5R0|G4V5R0_SCHMA Uncharacterized protein (Fragment) OS=Schistosoma mansoni GN=Smp_001095 PE=4 SV=1	3	69.781	0.000319732	3.49521	-2.73132	6.64063	TRUE	14.2665753167532	13.2714443110675	13.7208770455038	16.4716294300272	16.9128532624911	16.068377560778
G4V5R1	tr|G4V5R1|G4V5R1_SCHMA Putative nuclear pore complex protein OS=Schistosoma mansoni GN=Smp_001090 PE=4 SV=1	6	111.3	0.332533	0.478165	-0.472439	1.38745	FALSE	16.291930710793	16.9338613533633	15.2692892297098	16.4427969287442	16.7760772091528	16.6935244434925
G4V5R8	tr|G4V5R8|G4V5R8_SCHMA Kinesin heavy chain OS=Schistosoma mansoni GN=Smp_001040 PE=3 SV=1	37	115.09	0.307522	0.512124	-0.227637	1.17092	FALSE	20.9129123182721	20.8461485240422	20.8233036449814	21.0472502201433	21.3245822096417	20.8934443122467
G4V5R9	tr|G4V5R9|G4V5R9_SCHMA 5-amp-activated protein kinase gamma-2 non-catalytic subunit transcript variant 2 OS=Schistosoma mansoni GN=Smp_001030 PE=4 SV=1	5	32.155	0.0583413	1.23402	-0.727591	1.65587	FALSE	17.3015808808267	17.7784720274239	17.9598555525007	18.0587264685703	18.8598018046373	18.3041525273037
G4V5S1	tr|G4V5S1|G4V5S1_SCHMA Uncharacterized protein Smp_200240 OS=Schistosoma mansoni GN=Smp_200240 PE=4 SV=1	5	19.456	0.304832	0.51594	-0.641939	1.56043	FALSE	21.0690818343976	22.8308489943352	21.9644014827184	23.270654459226	21.8578817991724	22.6616143080625
G4V5T0	tr|G4V5T0|G4V5T0_SCHMA Mitotic phosphoprotein 44 OS=Schistosoma mansoni GN=Smp_000890 PE=4 SV=1	6	28.77	0.433707	0.362803	0.169733	1.12485	FALSE	20.4280265680924	20.240263837906	20.0136219901432	19.9936403898011	20.1195769843517	20.059495883185
G4V5T5	tr|G4V5T5|G4V5T5_SCHMA Putative ef-hand domain (C-terminal) containing protein OS=Schistosoma mansoni GN=Smp_171010 PE=4 SV=1	2	78.649	0.00439632	2.35691	-2.15366	4.44955	TRUE	13.2980158167032	13.5125371649315	13.7208770455038	15.7703388978354	16.5043981191545	14.7176732202515
G4V5T8	tr|G4V5T8|G4V5T8_SCHMA Mannose-6-phosphate isomerase OS=Schistosoma mansoni GN=Smp_089590 PE=3 SV=1	13	53.364	0.00420423	2.37631	-0.807443	1.75011	FALSE	20.1020494172991	20.1466677258705	20.2045464677904	20.9775765650877	21.0042201725831	20.8937969447287
G4V5U1	tr|G4V5U1|G4V5U1_SCHMA Putative polyglutamine binding protein OS=Schistosoma mansoni GN=Smp_089630 PE=4 SV=1	6	55.578	0.0090013	2.04569	1.85826	3.62569	TRUE	18.7642446988722	18.8404408461168	18.6250006994382	15.8142047585392	17.4632041498625	17.3775101775878
G4V5U3;G4V5U2	tr|G4V5U3|G4V5U3_SCHMA Succinate dehydrogenase [ubiquinone] iron-sulfur subunit, mitochondrial OS=Schistosoma mansoni GN=Smp_089640.2 PE=3 SV=1;tr|G4V5U2|G4V5U2_SCHMA Succinate dehydrogenase [ubiquinone] iron-sulfur subunit, mitochondrial OS=Schistosoma ma	13	32.268	0.236825	0.625572	0.272393	1.20781	FALSE	23.1352457222108	23.0736285786483	23.0246713666448	23.0188765087353	22.8326823723979	22.5648092620963
G4V5U8;E7BBC0	tr|G4V5U8|G4V5U8_SCHMA Integrin beta OS=Schistosoma mansoni GN=Smp_089700 PE=3 SV=1;tr|E7BBC0|E7BBC0_SCHMA Integrin beta OS=Schistosoma mansoni GN=beta-Int1 PE=2 SV=1	10	90.746	0.00402084	2.39568	-0.890186	1.85341	FALSE	17.66398265701	17.7430244225662	17.9186818260149	18.6053199807591	18.5846126237145	18.8063139553726
G4V5V7	tr|G4V5V7|G4V5V7_SCHMA Putative tubulin-specific chaperone B (Tubulin folding cofactor B) OS=Schistosoma mansoni GN=Smp_055400 PE=4 SV=1	9	27.62	0.0402097	1.39567	0.728303	1.65669	FALSE	21.8363492469192	21.3195188176401	21.1459028801847	20.6947665261498	20.9798255037392	20.4422705929881
G4V5V8	tr|G4V5V8|G4V5V8_SCHMA Uncharacterized protein OS=Schistosoma mansoni GN=Smp_151650 PE=4 SV=1	2	18.068	0.0114853	1.93986	1.09596	2.13756	FALSE	19.4535555744836	19.2313196925247	19.4267461406814	17.7643208174585	18.7567141365807	18.3026964238545
G4V5W4	tr|G4V5W4|G4V5W4_SCHMA Uncharacterized protein OS=Schistosoma mansoni GN=Smp_055450 PE=4 SV=1	2	18.377	0.261655	0.582272	-0.448914	1.36501	FALSE	18.1356263419991	19.3110434829441	18.743670233525	19.4193993370202	19.2726751802862	18.8450089216729
G4V5Y0	tr|G4V5Y0|G4V5Y0_SCHMA Isocitrate dehydrogenase [NAD] subunit, mitochondrial OS=Schistosoma mansoni GN=Smp_056200 PE=3 SV=1	8	43.546	0.0193154	1.7141	-0.801387	1.74278	FALSE	20.1075106158779	20.04194457812	19.445877533968	20.7064478280779	20.5689787377307	20.7240671134962
G4V5Y8	tr|G4V5Y8|G4V5Y8_SCHMA Uncharacterized protein OS=Schistosoma mansoni GN=Smp_056280 PE=4 SV=1	16	74.022	4.6799e-07	6.32976	-7.04958	132.475	TRUE	14.8339469309555	14.8761059510198	14.3828743316045	21.9894250245297	21.2939466782976	21.9582929651657
G4V5Z4	tr|G4V5Z4|G4V5Z4_SCHMA Uncharacterized protein OS=Schistosoma mansoni GN=Smp_124860 PE=4 SV=1	2	40.445	0.000177763	3.75016	-2.16162	4.47417	TRUE	13.2980158167032	13.5125371649315	13.7208770455038	15.7537427630721	15.9487374476819	15.3138104592839
G4V5Z8	tr|G4V5Z8|G4V5Z8_SCHMA Uncharacterized protein OS=Schistosoma mansoni GN=Smp_005180 PE=4 SV=1	12	57.872	0.182082	0.739733	-0.516023	1.43001	FALSE	19.7909242239699	20.1170077523503	20.7941855047792	20.4659234655994	20.6695722113923	21.1146918831795
G4V605	tr|G4V605|G4V605_SCHMA Putative 40s ribosomal protein S5 OS=Schistosoma mansoni GN=Smp_093440 PE=3 SV=1	10	21.755	0.255675	0.592312	1.02163	2.03022	FALSE	22.7946956257203	22.7742319071603	22.4941757296805	21.3211159948036	20.2284612005036	23.4486279803389
G4V609;G4V611;G4V610	tr|G4V609|G4V609_SCHMA Putative ef hand containing protein OS=Schistosoma mansoni GN=Smp_005230.1 PE=4 SV=1;tr|G4V611|G4V611_SCHMA EF hand containing protein OS=Schistosoma mansoni GN=Smp_005230.2 PE=4 SV=1;tr|G4V610|G4V610_SCHMA EF hand containing protein	12	34.167	0.000437709	3.35881	-2.20167	4.60012	TRUE	20.3821072454859	20.1616872430955	20.4101734722864	22.8585437441088	22.7660421927538	21.9343976532904
G4V613	tr|G4V613|G4V613_SCHMA Putative endoplasmic reticulum oxidoreductin 1 (ERO1) OS=Schistosoma mansoni GN=Smp_124920 PE=4 SV=1	15	47.492	0.00180879	2.74261	-1.15511	2.22701	TRUE	20.3615041579218	20.1284597069126	20.2098121705707	21.6431653296626	21.3160100213743	21.2059200329513
G4V615;G4V614;G4V616	tr|G4V615|G4V615_SCHMA Uncharacterized protein OS=Schistosoma mansoni GN=Smp_028170.2 PE=4 SV=1;tr|G4V614|G4V614_SCHMA Uncharacterized protein OS=Schistosoma mansoni GN=Smp_028170.3 PE=4 SV=1;tr|G4V616|G4V616_SCHMA Uncharacterized protein OS=Schistosoma ma	1	48.755	5.55206e-06	5.25555	-3.7183	13.162	TRUE	13.2980158167032	13.5125371649315	13.7208770455038	16.9837070137456	17.4875924722938	17.2150438776172
G4V622	tr|G4V622|G4V622_SCHMA Optic atrophy 1-like protein, opa1 OS=Schistosoma mansoni GN=Smp_028120 PE=3 SV=1	12	101.18	0.24463	0.611491	-0.283502	1.21715	FALSE	17.7780544237188	18.1239628651847	17.9338302998904	18.4811522041457	18.082724362641	18.1224762045686
G4V624;G4V625	tr|G4V624|G4V624_SCHMA Putative ubiquitin-conjugating enzyme E2 G OS=Schistosoma mansoni GN=Smp_028100.1 PE=3 SV=1;tr|G4V625|G4V625_SCHMA Putative ubiquitin-conjugating enzyme E2 G OS=Schistosoma mansoni GN=Smp_028100.2 PE=3 SV=1	4	19.28	0.0242202	1.61582	0.942671	1.92208	FALSE	21.352348400454	21.1774906493374	20.6787838349749	20.040933017189	19.7674680709371	20.5722088066955
G4V627	tr|G4V627|G4V627_SCHMA Slbp-P1-related OS=Schistosoma mansoni GN=Smp_137390 PE=4 SV=1	3	41.621	0.177463	0.750892	-0.784156	1.72208	FALSE	17.9536231533489	16.8112564016195	17.6717611716358	18.0659217770338	17.5764819471066	19.1467051232204
G4V630;G4V629	tr|G4V630|G4V630_SCHMA Bicaudal D-like protein OS=Schistosoma mansoni GN=Smp_028070.2 PE=4 SV=1;tr|G4V629|G4V629_SCHMA Bicaudal D-like protein OS=Schistosoma mansoni GN=Smp_028070.1 PE=4 SV=1	9	104.06	0.00052165	3.28262	-2.08478	4.24211	TRUE	16.0672492657467	16.3002037667738	15.5118413121702	17.7591751361641	17.9985458204521	18.3759243705222
G4V642	tr|G4V642|G4V642_SCHMA Nuclear pore membrane glycoprotein gp210-related OS=Schistosoma mansoni GN=Smp_142550 PE=4 SV=1	44	244.33	0.0710051	1.14871	-0.968325	1.95657	FALSE	18.0295060984024	18.4167148036868	19.6109326211117	19.5587221157062	19.8297506961306	19.5736558745188
G4V653	tr|G4V653|G4V653_SCHMA Putative talin 2 OS=Schistosoma mansoni GN=Smp_142630 PE=4 SV=1	27	235.41	0.00440886	2.35567	-1.2329	2.35039	TRUE	16.74926535331	17.16750981888	17.2673863970306	18.5437543494538	17.9045218708377	18.4345768642156
G4V654	tr|G4V654|G4V654_SCHMA Putative talin OS=Schistosoma mansoni GN=Smp_037860 PE=4 SV=1	10	60.534	0.00215273	2.66701	-1.72935	3.31578	TRUE	15.6971379175011	15.7008983833021	15.9335961959097	17.9147202368153	16.8592355113544	17.7457173644996
G4V655	tr|G4V655|G4V655_SCHMA NAD(P)H-hydrate epimerase OS=Schistosoma mansoni GN=Smp_142640 PE=3 SV=1	3	27.042	0.0225822	1.64623	1.16078	2.23578	FALSE	20.0025059789949	19.599215877671	18.7861853269354	17.9435691596075	18.5348903071742	18.4271064201663
G4V656;G4V6D0	tr|G4V656|G4V656_SCHMA Uncharacterized protein OS=Schistosoma mansoni GN=Smp_142650.2 PE=4 SV=1;tr|G4V6D0|G4V6D0_SCHMA Uncharacterized protein OS=Schistosoma mansoni GN=Smp_142650.3 PE=4 SV=1	6	133.72	0.00443001	2.35359	2.64658	6.26179	TRUE	17.5453437709345	16.9673538943473	16.8915044292161	15.4530306994708	13.2775820494722	14.733862896046
G4V664;G4V663	tr|G4V664|G4V664_SCHMA Similar to TatD DNAse domain containing 1 OS=Schistosoma mansoni GN=Smp_000810.1 PE=4 SV=1;tr|G4V663|G4V663_SCHMA Tatd DNAse-related OS=Schistosoma mansoni GN=Smp_000810.2 PE=4 SV=1	9	34.222	0.538166	0.269084	-0.225069	1.16883	FALSE	18.2915113282383	19.2543444744766	18.8596449026714	19.2433092578472	19.2560651187182	18.5813324712378
G4V669	tr|G4V669|G4V669_SCHMA Family M13 non-peptidase homologue (M13 family) OS=Schistosoma mansoni GN=Smp_000755 PE=4 SV=1	9	92.819	0.046575	1.33185	2.48383	5.59382	FALSE	15.4190490585862	18.6657631948632	17.144955297201	14.7243347446121	13.3388459562242	15.7150849026384
G4V672	tr|G4V672|G4V672_SCHMA Putative f1 OS=Schistosoma mansoni GN=Smp_194170 PE=4 SV=1	5	13.523	0.108038	0.966424	0.405964	1.32497	FALSE	21.7019299460972	21.5273437950468	21.5738482467538	21.1797922394833	20.9578058766921	21.447633266585
G4V678	tr|G4V678|G4V678_SCHMA Protein kinase OS=Schistosoma mansoni GN=Smp_176440 PE=4 SV=1	9	92.392	0.0103802	1.98379	-0.737065	1.66678	FALSE	17.3914917975507	17.632368413148	17.2774521556993	18.1656555228068	18.0931436930881	18.2537072811469
G4V683	tr|G4V683|G4V683_SCHMA Serine/threonine kinase OS=Schistosoma mansoni GN=Smp_098840 PE=3 SV=1	3	49.25	0.0425428	1.37117	-0.965122	1.95223	FALSE	14.6345838197288	15.3223371443571	15.5478849155629	16.7039083620717	15.8629563914675	15.8333073260436
G4V686	tr|G4V686|G4V686_SCHMA Putative propionyl-CoA carboxylase beta chain,mitochondrial OS=Schistosoma mansoni GN=Smp_163230 PE=4 SV=1	10	60.271	0.00619173	2.20819	-1.97145	3.92161	TRUE	16.4669041416136	16.8518043106031	17.991476947578	18.8660426090244	18.7751769105992	19.5833077214702
G4V697	tr|G4V697|G4V697_SCHMA Putative collagen alpha chain OS=Schistosoma mansoni GN=Smp_159600 PE=3 SV=1	6	159.24	0.013259	1.87749	-1.76538	3.39963	FALSE	15.6040413066453	15.111974317917	16.2565248194973	18.260355271329	17.3216619580716	16.6866562220141
G4V698	tr|G4V698|G4V698_SCHMA Putative malate dehydrogenase OS=Schistosoma mansoni GN=Smp_129610 PE=4 SV=1	14	41.758	0.30278	0.518873	0.333523	1.26009	FALSE	21.2540253339249	21.0787088006095	21.4726225200573	20.8228530027182	21.4367948140939	20.545140801935
G4V6A0	tr|G4V6A0|G4V6A0_SCHMA Uncharacterized protein OS=Schistosoma mansoni GN=Smp_129590 PE=4 SV=1	4	184.81	0.455633	0.341385	0.591011	1.5063	FALSE	12.5410478846797	15.1555362323613	14.8144072607767	13.2833653882194	13.3388459562242	14.1157477702241
G4V6A2	tr|G4V6A2|G4V6A2_SCHMA Uncharacterized protein Smp_201090 OS=Schistosoma mansoni GN=Smp_201090 PE=4 SV=1	4	57.023	4.01218e-05	4.39662	-4.60468	24.3303	TRUE	13.9106259908496	14.943869653039	13.7208770455038	18.8843857921723	19.1637394189478	18.3412975602269
G4V6A4	tr|G4V6A4|G4V6A4_SCHMA Uncharacterized protein OS=Schistosoma mansoni GN=Smp_129560 PE=4 SV=1	7	92.334	0.752009	0.123777	-0.399068	1.31866	FALSE	15.3813281597874	14.6446114689481	16.2539489540124	16.1419761006793	13.3388459562242	17.9962698858782
G4V6A5	tr|G4V6A5|G4V6A5_SCHMA Uncharacterized protein OS=Schistosoma mansoni GN=Smp_013690 PE=4 SV=1	13	48.04	0.0148434	1.82847	-0.838099	1.78769	FALSE	20.4528738117958	20.6604858025609	20.3538791112108	21.3534072404361	21.6368601344954	20.9912693351429
G4V6A6	tr|G4V6A6|G4V6A6_SCHMA Uncharacterized protein OS=Schistosoma mansoni GN=Smp_209010 PE=4 SV=1	4	45.251	0.103122	0.986649	-1.37877	2.60047	FALSE	13.2980158167032	14.6237718439733	14.4528267433561	16.3145944585184	14.0701536408491	16.126185463966
G4V6B1	tr|G4V6B1|G4V6B1_SCHMA Putative mitochondrial 2-oxoglutarate/malate carrier protein OS=Schistosoma mansoni GN=Smp_004080 PE=3 SV=1	10	34.372	0.0429401	1.36714	-2.27107	4.8268	FALSE	17.4976613613134	16.2920971148697	18.8341221873603	19.5907230545609	18.6753386296546	21.1710160739502
G4V6B2	tr|G4V6B2|G4V6B2_SCHMA Carbonic anhydrase OS=Schistosoma mansoni GN=Smp_004070 PE=3 SV=1	1	27.699	3.68933e-05	4.43305	-2.78634	6.89878	TRUE	13.2980158167032	13.5125371649315	13.7208770455038	16.3086060027191	15.9944487153065	16.5873996267194
G4V6B3	tr|G4V6B3|G4V6B3_SCHMA Putative cell division cycle 20 (Cdc20) (Fizzy) OS=Schistosoma mansoni GN=Smp_004060 PE=4 SV=1	7	52.103	0.00993282	2.00293	2.43425	5.40483	TRUE	18.7004348942101	18.7012443400321	18.7225263850726	14.9216029493756	16.4019310604398	17.4979265902755
G4V6B6	tr|G4V6B6|G4V6B6_SCHMA Putative chromosome transmission fidelity factor OS=Schistosoma mansoni GN=Smp_004020 PE=4 SV=1	15	154.55	0.184274	0.734537	0.520092	1.43405	FALSE	17.134351313157	17.1527897667915	17.0743763780036	17.0712755832041	15.8981037698262	16.8318610656819
G4V6B7	tr|G4V6B7|G4V6B7_SCHMA Putative 50s ribosomal protein L4 OS=Schistosoma mansoni GN=Smp_124320 PE=4 SV=1	6	46.331	0.0823102	1.08455	0.675642	1.59731	FALSE	18.3849543423066	18.1683127199105	19.09565341129	18.2027691531021	17.7598526690014	17.6593731715999
G4V6B9;P48501	tr|G4V6B9|G4V6B9_SCHMA Triosephosphate isomerase OS=Schistosoma mansoni GN=Smp_003990 PE=1 SV=1;sp|P48501|TPIS_SCHMA Triosephosphate isomerase OS=Schistosoma mansoni GN=TPI PE=1 SV=1	17	28.094	0.00209636	2.67854	-1.12568	2.18204	TRUE	24.1139308686063	24.4497202386184	23.9751709919499	25.3325083471102	25.3767596206395	25.2065791566702
G4V6C0	tr|G4V6C0|G4V6C0_SCHMA Family C2 unassigned peptidase (C02 family) OS=Schistosoma mansoni GN=Smp_003980 PE=3 SV=1	9	81.782	0.0294618	1.53074	-0.852215	1.80527	FALSE	18.3290854321539	17.5909086064621	17.8887296378109	18.9878270792924	18.4004095036694	18.9771330379875
G4V6C2	tr|G4V6C2|G4V6C2_SCHMA Putative elongation factor-1 beta,delta OS=Schistosoma mansoni GN=Smp_003970 PE=4 SV=1	11	26.66	0.00123326	2.90895	1.18365	2.27151	TRUE	24.4591643212186	24.2835992433851	24.0557375378269	23.1064859132043	23.1415264148755	22.9995315706364
G4V6C4	tr|G4V6C4|G4V6C4_SCHMA Putative 5-AMP-activated protein kinase, beta subunit OS=Schistosoma mansoni GN=Smp_124310 PE=4 SV=1	2	22.719	0.656233	0.182942	-0.257943	1.19577	FALSE	17.9891667370841	16.0799643006808	17.8903891219895	17.5954892891021	17.4124686404367	17.7253923132564
G4V6C5	tr|G4V6C5|G4V6C5_SCHMA Lamin B receptor (ERG24) OS=Schistosoma mansoni GN=Smp_124300 PE=4 SV=1	8	69.119	0.00107861	2.96714	-5.79085	55.363	TRUE	13.2980158167032	13.5125371649315	15.8601761842245	19.537729054672	18.9615627442834	21.5439858245234
G4V6C7	tr|G4V6C7|G4V6C7_SCHMA Uncharacterized protein OS=Schistosoma mansoni GN=Smp_003940 PE=4 SV=1	2	36.176	0.068273	1.16575	0.768258	1.70321	FALSE	16.4827321374987	16.6547846729374	16.5416774587307	15.7941260085836	16.4011186104645	15.1791761224007
G4V6D5	tr|G4V6D5|G4V6D5_SCHMA Succinate dehydrogenase [ubiquinone] cytochrome b small subunit OS=Schistosoma mansoni GN=Smp_037910 PE=3 SV=1	2	17.285	0.320399	0.494309	0.524956	1.43889	FALSE	19.3504736518711	20.2251368499076	20.4780881134156	19.5226250911628	18.7500432114568	20.2061634367774
G4V6D6	tr|G4V6D6|G4V6D6_SCHMA Uncharacterized protein OS=Schistosoma mansoni GN=Smp_084620 PE=4 SV=1	5	13.112	0.743774	0.128559	-0.0735193	1.05228	FALSE	23.1658374469598	23.3743995922308	22.8913923722702	23.21127239503	23.3252942648562	23.1156207935975
G4V6D7	tr|G4V6D7|G4V6D7_SCHMA Fas-associated factor-related OS=Schistosoma mansoni GN=Smp_084610 PE=4 SV=1	7	58.647	0.614255	0.211652	-0.150237	1.10975	FALSE	18.2062988566695	18.2979181209322	17.6091014410208	18.0315186654852	18.5052348932441	18.0272744212159
G4V6E1;G4V6E2;G4V6E3	tr|G4V6E1|G4V6E1_SCHMA Splicing factor 3b, subunit 1-related OS=Schistosoma mansoni GN=Smp_141630.1 PE=4 SV=1;tr|G4V6E2|G4V6E2_SCHMA Splicing factor 3b, subunit 1-related OS=Schistosoma mansoni GN=Smp_141630.2 PE=4 SV=1;tr|G4V6E3|G4V6E3_SCHMA Splicing fact	20	122.15	0.333497	0.476909	0.53041	1.44434	FALSE	18.5336238328255	18.5780996634	18.890502199157	17.4833497598499	17.6850641000584	19.2425805975017
G4V6E9;C1M1H8;G4VL73	tr|G4V6E9|G4V6E9_SCHMA Histone H2B OS=Schistosoma mansoni GN=Smp_036220 PE=3 SV=1;tr|C1M1H8|C1M1H8_SCHMA Histone H2B OS=Schistosoma mansoni GN=Smp_108390 PE=3 SV=1;tr|G4VL73|G4VL73_SCHMA Putative histone H2B OS=Schistosoma mansoni GN=Smp_077790 PE=3 SV=1	8	13.577	0.057451	1.2407	-1.40576	2.64957	FALSE	25.2677690130833	24.9752628737699	25.2264676048813	26.2100998379685	25.6067081011179	27.8699603029558
G4V6F4;G4V6F5;G4V6F7;G4V6F6	tr|G4V6F4|G4V6F4_SCHMA Putative arginine/serine-rich splicing factor OS=Schistosoma mansoni GN=Smp_036270.10 PE=4 SV=1;tr|G4V6F5|G4V6F5_SCHMA Putative arginine/serine-rich splicing factor OS=Schistosoma mansoni GN=Smp_036270.2 PE=4 SV=1;tr|G4V6F7|G4V6F7_SC	6	41.896	0.0219785	1.658	0.785625	1.72384	FALSE	22.932173672537	22.4639150540717	22.4701341638216	22.0793361293984	21.5391392007696	21.8908725278195
G4V6G0	tr|G4V6G0|G4V6G0_SCHMA Uncharacterized protein OS=Schistosoma mansoni GN=Smp_141710 PE=4 SV=1	13	168.14	0.996813	0.00138625	0.00445163	1.00309	FALSE	15.0735311387319	15.7885332533628	16.7349727932823	15.6033166543154	13.9752277260098	18.0051379055706
G4V6G9	tr|G4V6G9|G4V6G9_SCHMA Putative titin OS=Schistosoma mansoni GN=Smp_105020 PE=4 SV=1	9	83.179	0.0299314	1.52387	1.72012	3.29464	FALSE	19.5850075368222	19.8519072053818	19.4425394465962	18.0776434144571	16.6512685846976	18.9901766840105
G4V6H8	tr|G4V6H8|G4V6H8_SCHMA Uncharacterized protein OS=Schistosoma mansoni GN=Smp_060620 PE=4 SV=1	4	20.654	1.02768e-05	4.98814	-5.29142	39.1629	TRUE	13.2980158167032	13.5125371649315	13.7208770455038	18.6586964817356	19.5130361365058	18.2339481406862
G4V6I7	tr|G4V6I7|G4V6I7_SCHMA SWI/SNF-related OS=Schistosoma mansoni GN=Smp_154640 PE=4 SV=1	4	111.08	0.288722	0.53952	-0.96698	1.95474	FALSE	13.2980158167032	15.5476413175566	15.9698359745582	15.5031153732976	16.9147923690207	15.2985262725985
G4V6J3	tr|G4V6J3|G4V6J3_SCHMA Coatomer subunit gamma OS=Schistosoma mansoni GN=Smp_092770 PE=3 SV=1	33	101.22	0.772198	0.112271	0.132586	1.09626	FALSE	19.7294591752383	20.1908003848046	19.880061821354	19.4719061278267	19.2164252172392	20.7142317457848
G4V6J4	tr|G4V6J4|G4V6J4_SCHMA ATPase ASNA1 homolog OS=Schistosoma mansoni GN=Smp_210810 PE=3 SV=1	7	42.869	0.17873	0.747802	-0.630163	1.54774	FALSE	19.8648607411564	20.3649803281868	20.539347567043	20.9006391699578	21.5738765588492	20.1851614727845
G4V6J5	tr|G4V6J5|G4V6J5_SCHMA G protein-coupled receptor kinase OS=Schistosoma mansoni GN=Smp_210820 PE=3 SV=1	7	86.485	0.00895631	2.04787	-2.40666	5.30247	TRUE	13.8526753857531	15.6173113865298	13.7208770455038	16.0529832080235	17.2513731119937	17.1065002711059
G4V6K0	tr|G4V6K0|G4V6K0_SCHMA Putative DNA repair protein RAD51 OS=Schistosoma mansoni GN=Smp_124230 PE=3 SV=1	9	36.704	0.115558	0.937201	-0.742365	1.67292	FALSE	20.1972702536601	20.20594480452	19.8508968806392	20.6285759535594	21.6309743903882	20.2216564794482
G4V6K1	tr|G4V6K1|G4V6K1_SCHMA Uncharacterized protein OS=Schistosoma mansoni GN=Smp_124220 PE=4 SV=1	16	219	0.577321	0.238582	0.385766	1.30655	FALSE	18.583009793107	18.7176631149358	19.6794820434443	17.2601866474826	19.2948543337627	19.267814779647
G4V6K8	tr|G4V6K8|G4V6K8_SCHMA Putative histone h1/h5 OS=Schistosoma mansoni GN=Smp_003770 PE=3 SV=1	4	20.446	0.178474	0.748424	-1.27373	2.41786	FALSE	22.3717898831081	21.6347453878124	22.3694789056904	23.4199240144853	21.7500516966753	25.0272330937092
G4V6L4	tr|G4V6L4|G4V6L4_SCHMA Uncharacterized protein OS=Schistosoma mansoni GN=Smp_003700 PE=4 SV=1	4	19.144	0.00785984	2.10459	1.29096	2.4469	TRUE	19.0758502877768	18.522079000422	19.5982499100774	17.7756903781675	17.9639643565913	17.5836574838937
G4V6L7	tr|G4V6L7|G4V6L7_SCHMA Putative dead box ATP-dependent RNA helicase OS=Schistosoma mansoni GN=Smp_003660 PE=4 SV=1	21	49.088	0.822203	0.0850207	-0.0561249	1.03967	FALSE	22.6628224086906	22.9321522375712	23.3247990137179	23.0611095358499	22.9374582749354	23.0895804298908
G4V6L9	tr|G4V6L9|G4V6L9_SCHMA Putative smad nuclear interacting protein OS=Schistosoma mansoni GN=Smp_124110 PE=4 SV=1	2	84.665	0.0431232	1.36529	1.53853	2.90497	FALSE	15.994095555499	15.2435705964337	13.7116621925613	13.2833653882194	13.3388459562242	13.7115412278476
G4V6M0	tr|G4V6M0|G4V6M0_SCHMA Putative splicing factor 3a OS=Schistosoma mansoni GN=Smp_003630 PE=4 SV=1	15	59.673	0.00606216	2.21737	0.995657	1.99399	FALSE	20.5297767513808	20.2922097790406	20.4300172062004	19.6530564406298	19.5455282808506	19.0664482984067
G4V6M9	tr|G4V6M9|G4V6M9_SCHMA Venom allergen-like (VAL) 16 protein OS=Schistosoma mansoni GN=Smp_124070 PE=3 SV=1	7	15.873	3.46706e-06	5.46004	4.14141	17.6477	TRUE	23.852378153342	23.5753826348515	23.2779889014238	19.5689690576015	19.5071439778695	19.205416868207
G4V6P1	tr|G4V6P1|G4V6P1_SCHMA Uncharacterized protein Smp_200330 OS=Schistosoma mansoni GN=Smp_200330 PE=4 SV=1	12	28.21	0.0140101	1.85356	0.711671	1.6377	FALSE	21.3718650215181	21.1092813099804	21.1475596542633	20.2964553341901	20.6358961496731	20.5613409960503
G4V6P2	tr|G4V6P2|G4V6P2_SCHMA Putative threonyl-tRNA synthetase OS=Schistosoma mansoni GN=Smp_123990 PE=4 SV=1	11	46.402	0.0434833	1.36168	0.507808	1.42189	FALSE	22.4190955978865	22.3558101602586	22.2191612411142	21.7364262696921	22.0182739448148	21.7159421135499
G4V6P4	tr|G4V6P4|G4V6P4_SCHMA Putative 60s ribosomal protein L23a OS=Schistosoma mansoni GN=Smp_003410 PE=3 SV=1	8	22.008	0.0708213	1.14984	1.16872	2.24812	FALSE	25.400156436758	24.7062449081718	24.7981338590068	23.8355274984873	22.8131597595495	24.74969563938
G4V6P6	tr|G4V6P6|G4V6P6_SCHMA Serine/threonine kinase OS=Schistosoma mansoni GN=Smp_068060.1 PE=4 SV=1	5	114.55	0.0397802	1.40033	-1.12758	2.18492	FALSE	17.1398683181246	16.9472417505015	17.2264060157314	19.0563200356062	18.1781396155293	17.4617962619667
G4V6P7	tr|G4V6P7|G4V6P7_SCHMA Uncharacterized protein OS=Schistosoma mansoni GN=Smp_068070 PE=4 SV=1	16	68.707	0.0761367	1.11841	0.549772	1.46385	FALSE	19.8065515330182	19.787291728314	19.6721558718456	18.8751883016323	19.6252218297933	19.1162728337917
G4V6P8	tr|G4V6P8|G4V6P8_SCHMA Uncharacterized protein OS=Schistosoma mansoni GN=Smp_068080 PE=4 SV=1	2	16.104	0.0447793	1.34892	0.909191	1.87799	FALSE	18.901194407339	17.7654839246464	18.044471417871	17.0249434852055	17.4592236126496	17.4994103539011
G4V6P9	tr|G4V6P9|G4V6P9_SCHMA Putative zinc phosphodiesterase OS=Schistosoma mansoni GN=Smp_068090 PE=3 SV=1	7	46.552	0.429127	0.367414	0.221549	1.16598	FALSE	20.0340523601138	20.0662200408534	19.7992334493075	19.9322045658129	19.9937953078229	19.3088596287441
G4V6Q1	tr|G4V6Q1|G4V6Q1_SCHMA Putative microfibril-associated protein OS=Schistosoma mansoni GN=Smp_068100 PE=4 SV=1	3	51.322	0.0090506	2.04332	0.871071	1.82902	FALSE	18.2729625019751	17.9707690719835	18.4503845191947	17.1603522204444	17.5140558008579	17.4064951389369
G4V6R4	tr|G4V6R4|G4V6R4_SCHMA Putative rab9 and OS=Schistosoma mansoni GN=Smp_067140 PE=4 SV=1	10	23.309	0.00329316	2.48239	-1.90642	3.74877	TRUE	19.1771511351153	19.936386580231	20.4350649937566	21.8707718088385	22.071699752997	21.3253863863535
G4V6S0	tr|G4V6S0|G4V6S0_SCHMA Eukaryotic translation initiation factor 3 subunit H OS=Schistosoma mansoni GN=Smp_210570 PE=3 SV=1	10	38.956	0.00107382	2.96907	1.50753	2.84322	TRUE	22.4544711860585	22.3468160323149	22.2592289161552	21.0217639907155	21.0863581876046	20.4298185805464
G4V6S8	tr|G4V6S8|G4V6S8_SCHMA Uncharacterized protein OS=Schistosoma mansoni GN=Smp_196840 PE=4 SV=1	1	152.83	0.38442	0.415194	0.482258	1.39693	FALSE	16.0960617888297	14.5414717162578	14.6443789517033	15.1900576665336	14.3592252002799	14.28585702626
G4V6T0;G4V6S9	tr|G4V6T0|G4V6T0_SCHMA Putative negative cofactor 2 transcriptional co-repressor (Nc2) (Fragment) OS=Schistosoma mansoni GN=Smp_167570.2 PE=4 SV=1;tr|G4V6S9|G4V6S9_SCHMA Putative negative cofactor 2 transcriptional co-repressor (Nc2) (Fragment) OS=Schistos	2	30.784	0.344578	0.462712	1.19326	2.28669	FALSE	17.7967119713188	16.7301596219065	16.5108020689374	16.2829404503287	13.3388459562242	17.8361032394047
G4V6T2	tr|G4V6T2|G4V6T2_SCHMA Putative cystathionine beta-lyase OS=Schistosoma mansoni GN=Smp_083650 PE=3 SV=1	8	46.42	0.0112832	1.94757	0.697694	1.62191	FALSE	20.6505180960471	20.7442761087947	20.8251781079781	19.9226474460931	20.00507366997	20.199169523784
G4V6T3	tr|G4V6T3|G4V6T3_SCHMA Uncharacterized protein OS=Schistosoma mansoni GN=Smp_083680 PE=4 SV=1	2	35.727	0.00679892	2.16756	3.87265	14.6482	TRUE	18.6405735793958	18.0762448465415	18.1247186713254	13.2833653882194	13.3388459562242	16.6013838561551
G4V6T6	tr|G4V6T6|G4V6T6_SCHMA Putative mitochondrial phosphate carrier protein OS=Schistosoma mansoni GN=Smp_083720 PE=3 SV=1	8	34.899	0.115016	0.939241	-1.50376	2.8358	FALSE	18.9525785664013	19.2713475983056	21.3702561743272	21.703815369965	20.2480603779529	22.1535788275747
G4V6T7;G4V6T8	tr|G4V6T7|G4V6T7_SCHMA Uncharacterized protein OS=Schistosoma mansoni GN=Smp_083730.1 PE=4 SV=1;tr|G4V6T8|G4V6T8_SCHMA Uncharacterized protein OS=Schistosoma mansoni GN=Smp_083730.2 PE=4 SV=1	3	32.109	0.114977	0.93939	0.437753	1.35449	FALSE	21.8875948319559	21.4458909600721	21.3434535810923	20.9274339198197	21.2300438373047	21.2062040000895
G4V6T9	tr|G4V6T9|G4V6T9_SCHMA Putative centrin OS=Schistosoma mansoni GN=Smp_083740 PE=4 SV=1	1	19.151	8.11932e-06	5.09048	-3.00002	8.00013	TRUE	13.2980158167032	13.5125371649315	13.7208770455038	16.4762825385307	16.5732321492232	16.481986224602
G4V6V0	tr|G4V6V0|G4V6V0_SCHMA Uncharacterized protein OS=Schistosoma mansoni GN=Smp_006060 PE=4 SV=1	1	42.698	0.0410002	1.38721	-1.59972	3.03084	FALSE	15.1738589919127	13.5125371649315	13.7208770455038	14.7983685756059	16.1262083895277	16.2818472483015
G4V6W0	tr|G4V6W0|G4V6W0_SCHMA Uncharacterized protein OS=Schistosoma mansoni GN=Smp_003340 PE=4 SV=1	11	121.55	0.926588	0.0331133	0.0479813	1.03382	FALSE	15.4075076236113	15.3508084426507	16.0858509496027	15.1255564768741	14.991259119188	16.5834076622441
G4V6W2	tr|G4V6W2|G4V6W2_SCHMA Uncharacterized protein OS=Schistosoma mansoni GN=Smp_123930 PE=4 SV=1	2	47.839	0.151539	0.819474	-1.31074	2.48069	FALSE	13.2980158167032	13.5125371649315	16.1821104377507	15.5668709484209	15.7777029914162	15.5803062743941
G4V6X0_SCHMASynaptobrevin,putative	tr|G4V6X0|G4V6X0_SCHMA Synaptobrevin, putative|Pfam:PF00957 OS=Schistosoma mansoni GN=Smp_123870 PE=4 SV=1	4	18.193	0.00302243	2.51964	5.15374	35.5983	TRUE	19.7928560541303	19.6756460191052	19.6636018191071	13.2833653882194	13.3388459562242	17.0486783240733
G4V6X1	tr|G4V6X1|G4V6X1_SCHMA Sh3 domain grb2-like protein B1 (Endophilin B1) OS=Schistosoma mansoni GN=Smp_003230 PE=4 SV=1	5	28.304	0.000796762	3.09867	-4.36968	20.673	TRUE	13.2980158167032	13.5125371649315	14.674320416514	18.5956764038812	16.8943005832819	19.1039248372078
G4V6X9	tr|G4V6X9|G4V6X9_SCHMA Putative sorting nexin OS=Schistosoma mansoni GN=Smp_003140.1 PE=4 SV=1	9	43.095	0.148705	0.827675	-1.27833	2.42557	FALSE	20.5127048415072	19.3528997060894	18.7223993444009	21.5568699119329	19.3495718046484	21.5165415037482
G4V6Y5	tr|G4V6Y5|G4V6Y5_SCHMA Kettin/titin-related protein OS=Schistosoma mansoni GN=Smp_197080 PE=4 SV=1	7	89.738	0.000413927	3.38308	3.23998	9.44782	TRUE	19.4059762464417	19.5485666629332	19.1223776485726	16.670190089897	15.1663970198466	16.520389834019
G4V6Y7	tr|G4V6Y7|G4V6Y7_SCHMA Putative kynurenine aminotransferase OS=Schistosoma mansoni GN=Smp_123750 PE=4 SV=1	18	110.87	0.16553	0.781122	-0.315595	1.24452	FALSE	20.0758502877768	20.1039838456142	20.1603707159236	20.6579926812271	20.2868285826111	20.3421690071097
G4V6Z2	tr|G4V6Z2|G4V6Z2_SCHMA Putative gaba(A) receptor-associated protein OS=Schistosoma mansoni GN=Smp_073790 PE=3 SV=1	5	14.489	0.37999	0.420228	-0.371115	1.29335	FALSE	22.3734795515124	21.7026224476028	20.95194907149	22.0576692968386	22.2002939590222	21.8834339826927
G4V6Z5	tr|G4V6Z5|G4V6Z5_SCHMA Transmembrane 9 superfamily member OS=Schistosoma mansoni GN=Smp_162040 PE=3 SV=1	4	32.799	0.0741341	1.12998	-1.38888	2.61875	FALSE	17.5302346343777	16.9224848047189	19.2427373542732	19.2200032737523	18.8946997752289	19.7473908306899
G4V6Z7	tr|G4V6Z7|G4V6Z7_SCHMA Actin-related protein 2/3 complex subunit 5 OS=Schistosoma mansoni GN=Smp_073720.1 PE=3 SV=1	4	17.345	0.641818	0.192588	-0.181411	1.13399	FALSE	20.7546876535561	20.8039202886529	19.8226716981743	20.574268842829	21.0676883925855	20.2835552263543
G4V6Z9;G4V700	tr|G4V6Z9|G4V6Z9_SCHMA Uncharacterized protein OS=Schistosoma mansoni GN=Smp_073690.2 PE=4 SV=1;tr|G4V700|G4V700_SCHMA Uncharacterized protein OS=Schistosoma mansoni GN=Smp_073690.1 PE=4 SV=1	6	26.776	0.00723385	2.14063	2.27224	4.83074	TRUE	19.448890428815	19.1500189353701	19.1235005307897	17.8367153441508	15.7402759517009	17.3286840446668
G4V702	tr|G4V702|G4V702_SCHMA Uncharacterized protein OS=Schistosoma mansoni GN=Smp_162000 PE=4 SV=1	37	863.15	0.0817438	1.08755	-1.9529	3.87151	FALSE	12.5384110732039	13.1346158376492	14.2746592983136	15.1819622714201	13.6349958489962	16.9894226490585
G4V703	tr|G4V703|G4V703_SCHMA Uncharacterized protein OS=Schistosoma mansoni GN=Smp_118280 PE=4 SV=1	3	20.303	0.116742	0.932774	-1.96127	3.89404	FALSE	13.2980158167032	13.5125371649315	15.5110178225009	14.961709365701	15.0848250222216	18.1588447414983
G4V705	tr|G4V705|G4V705_SCHMA Putative methionyl-tRNA synthetase OS=Schistosoma mansoni GN=Smp_073620 PE=4 SV=1	15	32.899	0.0359001	1.4449	0.689433	1.61265	FALSE	24.3834830500617	23.9795577400353	23.6984546676263	23.4260437207057	23.4353180478194	23.131834036923
G4V708	tr|G4V708|G4V708_SCHMA Putative platelet-activating factor acetylhydrolase ib OS=Schistosoma mansoni GN=Smp_073600 PE=4 SV=1	6	25.199	0.569542	0.244474	0.149873	1.10947	FALSE	20.4833776834656	21.0090383802061	20.4839702874216	20.6616997678128	20.2626464634971	20.6024198320535
G4V709	tr|G4V709|G4V709_SCHMA GTP-binding protein-like protein OS=Schistosoma mansoni GN=Smp_073590 PE=3 SV=1	8	22.5	0.312648	0.504944	0.284194	1.21773	FALSE	22.9149248414132	22.7411250149551	22.2349807514694	22.1941404711519	22.3019272499316	22.5423801537501
G4V710	tr|G4V710|G4V710_SCHMA Uncharacterized protein OS=Schistosoma mansoni GN=Smp_161990 PE=4 SV=1	3	17.6	0.0415755	1.38116	1.28948	2.4444	FALSE	19.3917586091979	18.9445700667519	20.2009189153958	17.6994379658737	17.9222818853414	19.0470849060239
G4V713	tr|G4V713|G4V713_SCHMA Putative eukaryotictranslation initiation factor 3 subunit OS=Schistosoma mansoni GN=Smp_006000 PE=4 SV=1	9	27.434	0.230382	0.637551	0.312496	1.24185	FALSE	21.8101936387148	21.940919497972	22.3816306104203	21.5988136418872	21.8537419556777	21.7427002249387
G4V714	tr|G4V714|G4V714_SCHMA Putative eukaryotictranslation initiation factor 3 subunit OS=Schistosoma mansoni GN=Smp_101200 PE=4 SV=1	2	13.421	0.0440005	1.35654	0.525463	1.4394	FALSE	20.4804537239781	20.2829725000368	20.2615695395379	19.8218250760336	20.0072052069855	19.6195774676568
G4V720	tr|G4V720|G4V720_SCHMA RNA helicase OS=Schistosoma mansoni GN=Smp_125330 PE=3 SV=1	16	169.99	0.518583	0.285182	0.960554	1.94606	FALSE	17.0287438163172	17.2218421163273	18.1512607925571	17.0954462369769	13.4359004961864	18.988838000782
G4V721;Q9XYR4	tr|G4V721|G4V721_SCHMA Putative phosphoenolpyruvate carboxykinase OS=Schistosoma mansoni GN=Smp_005880 PE=3 SV=1;tr|Q9XYR4|Q9XYR4_SCHMA Phosphoenolpyruvate carboxykinase OS=Schistosoma mansoni PE=2 SV=1	24	70.39	0.00791985	2.10128	-0.930018	1.9053	FALSE	20.1984908939706	20.3699157874912	20.209751754308	21.2494894368768	21.4689069992477	20.849815170098
G4V725;G4V724;G4V723	tr|G4V725|G4V725_SCHMA Uncharacterized protein OS=Schistosoma mansoni GN=Smp_005860.1 PE=4 SV=1;tr|G4V724|G4V724_SCHMA Uncharacterized protein OS=Schistosoma mansoni GN=Smp_005860.3 PE=4 SV=1;tr|G4V723|G4V723_SCHMA Uncharacterized protein OS=Schistosoma ma	18	45.153	0.0375631	1.42524	0.670847	1.59201	FALSE	26.1138466359371	25.600888443469	25.6765587699166	25.2127435599617	24.8418379975691	25.324172114453
G4V734	tr|G4V734|G4V734_SCHMA Putative gtp-binding protein (Q) alpha-11 subunit, gna11 OS=Schistosoma mansoni GN=Smp_005790 PE=4 SV=1	13	41.63	0.00381919	2.41803	-1.16915	2.2488	TRUE	20.5945686888707	21.074557881285	21.0132931786479	22.2380403467982	22.2033338903541	21.7485053973714
G4V750;G4V751;G4V752	tr|G4V750|G4V750_SCHMA Putative granulin OS=Schistosoma mansoni GN=Smp_170550.2 PE=4 SV=1;tr|G4V751|G4V751_SCHMA Putative granulin OS=Schistosoma mansoni GN=Smp_170550.3 PE=4 SV=1;tr|G4V752|G4V752_SCHMA Putative granulin OS=Schistosoma mansoni GN=Smp_17055	5	76.843	0.433872	0.362639	-0.204389	1.1522	FALSE	18.4429232665387	18.1144368665362	17.9037461152082	18.1000512694049	18.4343890204223	18.5398331083176
G4V759	tr|G4V759|G4V759_SCHMA Uncharacterized protein OS=Schistosoma mansoni GN=Smp_064200 PE=4 SV=1	2	32.313	0.00678441	2.16849	-2.04995	4.14092	TRUE	13.2980158167032	13.5125371649315	13.7208770455038	15.0711986907302	16.6538686247914	14.9562193008797
G4V767	tr|G4V767|G4V767_SCHMA Putative cornichon OS=Schistosoma mansoni GN=Smp_082990 PE=4 SV=1	4	30.101	0.189593	0.722179	-0.32072	1.24895	FALSE	21.5710696044448	21.7307512409681	21.9240958067199	22.0534182497044	22.2697070237377	21.8649507314095
G4V768	tr|G4V768|G4V768_SCHMA Putative wd-repeat protein OS=Schistosoma mansoni GN=Smp_167150 PE=4 SV=1	8	41.983	0.89342	0.0489442	-0.0374413	1.02629	FALSE	21.3760665389861	21.6841247893736	21.8190524247212	21.8456493414637	21.8955745404829	21.2503436579911
G4V773	tr|G4V773|G4V773_SCHMA Let1/narf-related OS=Schistosoma mansoni GN=Smp_083020 PE=3 SV=1	5	49.786	0.00500801	2.30033	2.21057	4.62859	TRUE	17.2338775378442	16.185724484749	16.2584653872983	14.9078217542305	14.6910024373517	13.4475262082313
G4V774	tr|G4V774|G4V774_SCHMA Putative inhibitor of apoptosis (Iap) domain family member OS=Schistosoma mansoni GN=Smp_083030 PE=3 SV=1	5	31.754	0.621972	0.206229	0.114302	1.08245	FALSE	20.1400624434156	20.0073896987467	19.6611516154115	19.9454790551973	19.8427314741771	19.677486445123
G4V775;G4V776	tr|G4V775|G4V775_SCHMA Adducin related protein OS=Schistosoma mansoni GN=Smp_083040.1 PE=4 SV=1;tr|G4V776|G4V776_SCHMA Adducin related protein OS=Schistosoma mansoni GN=Smp_083040.2 PE=4 SV=1	14	68.555	0.0204024	1.69032	-0.671802	1.59306	FALSE	20.5131136721077	20.7024186684817	20.7846854120381	21.3874253398514	21.1038601895707	21.5243385517225
G4V779;G4V780	tr|G4V779|G4V779_SCHMA Elongation factor Tu OS=Schistosoma mansoni GN=Smp_073500.1 PE=3 SV=1;tr|G4V780|G4V780_SCHMA Elongation factor Tu OS=Schistosoma mansoni GN=Smp_073500.2 PE=3 SV=1	20	47.457	0.270391	0.568008	-0.279847	1.21407	FALSE	23.1551810541812	23.2634347914236	23.6833052836658	23.7257801479194	23.7365181727406	23.479162348487
G4V783	tr|G4V783|G4V783_SCHMA Uncharacterized protein OS=Schistosoma mansoni GN=Smp_161960 PE=4 SV=1	3	38.585	2.58776e-05	4.58708	4.66606	25.3878	TRUE	18.7472927564895	18.1795535179392	17.3844167712107	13.2833653882194	13.3388459562242	13.6908642669623
G4V785	tr|G4V785|G4V785_SCHMA Putative prefoldin subunit OS=Schistosoma mansoni GN=Smp_073540 PE=4 SV=1	8	20.549	0.0969548	1.01343	0.480304	1.39504	FALSE	22.1982959998785	21.9217217684501	21.5585702540071	21.4657406770679	21.5292846881313	21.2426517907234
G4V786	tr|G4V786|G4V786_SCHMA Ribonuclease II-related OS=Schistosoma mansoni GN=Smp_161980 PE=3 SV=1	11	112.58	0.167079	0.777079	0.519466	1.43342	FALSE	16.8568388120884	17.0297039106934	17.3563100295084	16.2144090686579	17.1638922872966	16.3061522729289
G4V788	tr|G4V788|G4V788_SCHMA G beta-like protein gbl OS=Schistosoma mansoni GN=Smp_073560.2 PE=4 SV=1	3	35.165	0.0706232	1.15105	-1.82871	3.5522	FALSE	16.3361515463549	13.5125371649315	13.7208770455038	15.9641793797033	16.0573297946845	17.0342006900024
G4V790	tr|G4V790|G4V790_SCHMA Deoxyuridine 5-triphosphate nucleotidohydrolase OS=Schistosoma mansoni GN=Smp_079240 PE=4 SV=1	8	16.811	0.00963408	2.01619	0.956101	1.94006	FALSE	22.3954148823502	22.3529827950872	21.7258043977166	21.1446897559967	21.190010097279	21.271200004102
G4V793;G4V792	tr|G4V793|G4V793_SCHMA GTP-binding nuclear protein OS=Schistosoma mansoni GN=Smp_079430.2 PE=3 SV=1;tr|G4V792|G4V792_SCHMA Putative ran OS=Schistosoma mansoni GN=Smp_079430.1 PE=4 SV=1	16	24.859	0.612957	0.21257	0.09926	1.07122	FALSE	24.884332838205	25.0760293648063	25.0815545461237	24.8366234624257	25.007471427815	24.9000418708055
G4V7A8	tr|G4V7A8|G4V7A8_SCHMA Transmembrane protein tmp21-related OS=Schistosoma mansoni GN=Smp_079310 PE=3 SV=1	3	24.1	0.599564	0.222164	0.169624	1.12477	FALSE	21.5979772644969	21.9803143321551	21.6596706471615	21.3856100215764	21.2185608525638	22.1249200642073
G4V7B4;G4V7B3	tr|G4V7B4|G4V7B4_SCHMA Putative rna binding motif protein 4,lark OS=Schistosoma mansoni GN=Smp_079290.1 PE=4 SV=1;tr|G4V7B3|G4V7B3_SCHMA Putative rna binding motif protein 4,lark OS=Schistosoma mansoni GN=Smp_079290.3 PE=4 SV=1	17	32.245	0.0433878	1.36263	0.569835	1.48435	FALSE	24.5126196538811	24.1755099831171	24.0963357558843	23.7743360659106	23.8186115078384	23.4820130282888
G4V7C7	tr|G4V7C7|G4V7C7_SCHMA Uncharacterized protein OS=Schistosoma mansoni GN=Smp_194860 PE=4 SV=1	3	10.866	0.0315008	1.50168	5.03313	32.7434	FALSE	20.1749652461592	20.9783968609361	20.224747719629	13.2833653882194	13.3388459562242	19.6565022773954
G4V7D6	tr|G4V7D6|G4V7D6_SCHMA Putative ATPase OS=Schistosoma mansoni GN=Smp_167200 PE=4 SV=1	17	66.115	0.0181683	1.74068	1.07869	2.11211	FALSE	20.694799593721	21.1433087137806	21.7096064035751	20.2503386305212	19.7675686679323	20.2937455786314
G4V7D8;G4V7D7	tr|G4V7D8|G4V7D8_SCHMA Uncharacterized protein OS=Schistosoma mansoni GN=Smp_083080.1 PE=4 SV=1;tr|G4V7D7|G4V7D7_SCHMA Uncharacterized protein OS=Schistosoma mansoni GN=Smp_083080.2 PE=4 SV=1	15	38.515	0.018139	1.74139	-0.634571	1.55248	FALSE	23.4846637403494	23.5304007186985	23.5781399580545	24.1669310864802	24.3443881007888	23.9855969243657
G4V7E1	tr|G4V7E1|G4V7E1_SCHMA Putative mitochondrial translational initiation factor OS=Schistosoma mansoni GN=Smp_167220 PE=4 SV=1	10	73.14	0.0168687	1.77292	1.03216	2.04509	FALSE	17.5207239876345	17.6717376487349	18.1557210233158	16.9492285206406	16.2657834815914	17.0366845690538
G4V7E3	tr|G4V7E3|G4V7E3_SCHMA Putative mitochondrial chaperone BCS1 OS=Schistosoma mansoni GN=Smp_083120 PE=4 SV=1	8	39.668	0.724798	0.139783	-0.48568	1.40025	FALSE	13.9243309061369	17.5804434884743	19.0790803544289	17.8017369858993	17.516212714026	16.7229448390679
G4V7E9	tr|G4V7E9|G4V7E9_SCHMA Putative mrna-capping enzyme OS=Schistosoma mansoni GN=Smp_196350 PE=4 SV=1	2	22.519	0.0621267	1.20672	2.47907	5.57538	FALSE	17.5182278809494	17.2001139564614	17.049206226981	17.3006262573451	13.3388459562242	13.6908642669623
G4V7F3	tr|G4V7F3|G4V7F3_SCHMA Uncharacterized protein OS=Schistosoma mansoni GN=Smp_167240 PE=4 SV=1	3	88.208	0.697768	0.156289	0.164679	1.12092	FALSE	17.7148186224265	16.9739600986987	16.7485442782627	16.4368412769538	17.5651835131314	16.9412618846379
G4V7F5;G4V7F4	tr|G4V7F5|G4V7F5_SCHMA Ubiquitin carboxyl-terminal hydrolase OS=Schistosoma mansoni GN=Smp_083200.1 PE=3 SV=1;tr|G4V7F4|G4V7F4_SCHMA Ubiquitin carboxyl-terminal hydrolase OS=Schistosoma mansoni GN=Smp_083200.2 PE=3 SV=1	9	35.659	0.10551	0.976706	0.427647	1.34504	FALSE	21.2472423215492	21.0683090228708	21.0342557096576	20.4322685471639	20.9707521483757	20.6638460611127
G4V7F6	tr|G4V7F6|G4V7F6_SCHMA Uncharacterized protein OS=Schistosoma mansoni GN=Smp_167250 PE=4 SV=1	6	56.721	0.00147069	2.83248	-2.48959	5.61619	TRUE	13.6601681339432	14.8287123517853	14.9101405814032	16.6768758112216	16.6996886406301	17.4912307047053
G4V7G0	tr|G4V7G0|G4V7G0_SCHMA COP9 signalosome subunit 6 (M67 family) OS=Schistosoma mansoni GN=Smp_126690 PE=4 SV=1	2	35.86	0.452131	0.344735	0.185446	1.13717	FALSE	18.7747848584874	18.489494603794	18.7743463857505	18.7699457367717	18.4816770206555	18.2306657017179
G4V7G3	tr|G4V7G3|G4V7G3_SCHMA Proteasome assembly chaperone 2 OS=Schistosoma mansoni GN=Smp_126670 PE=3 SV=1	3	29.848	0.394507	0.403945	0.20184	1.15016	FALSE	19.3970845060021	19.3565925426941	19.4797174985444	18.9690077140698	19.5083283494953	19.1505381957455
G4V7G8	tr|G4V7G8|G4V7G8_SCHMA Putative adenosine kinase OS=Schistosoma mansoni GN=Smp_008360 PE=1 SV=1	9	39.392	0.32308	0.49069	-0.267992	1.20413	FALSE	20.5216724605765	20.4568532250752	20.1596359033377	20.6604225378229	20.9567769026522	20.3249381588103
G4V7H0	tr|G4V7H0|G4V7H0_SCHMA Putative pap-inositol-1,4-phosphatase OS=Schistosoma mansoni GN=Smp_008320 PE=4 SV=1	14	35.399	0.931167	0.0309722	0.0197707	1.0138	FALSE	21.5649045119224	21.1937028423097	21.0952119626434	21.3460376408231	21.3355939024743	21.1128755402622
G4V7H1;O17462	tr|G4V7H1|G4V7H1_SCHMA Putative succinate dehydrogenase OS=Schistosoma mansoni GN=Smp_008310 PE=4 SV=1;tr|O17462|O17462_SCHMA Uncharacterized protein (Fragment) OS=Schistosoma mansoni PE=2 SV=1	2	21.472	0.43402	0.36249	-1.08426	2.12029	FALSE	13.2980158167032	16.2819560521426	17.2377091974531	16.6084760804775	15.0439037416913	18.4180849208164
G4V7H8	tr|G4V7H8|G4V7H8_SCHMA Putative rab-18 OS=Schistosoma mansoni GN=Smp_008230 PE=4 SV=1	2	23.993	0.715477	0.145405	-0.418123	1.33619	FALSE	16.7851853827135	17.7555869677867	13.7208770455038	16.9462129577084	15.6128003308413	16.9570063138481
G4V7I6;G4V7I7	tr|G4V7I6|G4V7I6_SCHMA Uncharacterized protein OS=Schistosoma mansoni GN=Smp_008140.1 PE=4 SV=1;tr|G4V7I7|G4V7I7_SCHMA Uncharacterized protein OS=Schistosoma mansoni GN=Smp_008140.2 PE=4 SV=1	5	18.397	0.00124497	2.90484	2.9135	7.53443	TRUE	19.3390199852825	19.5097223501174	19.208890547543	15.341443135168	17.0999240652759	16.8757732859196
G4V7J3	tr|G4V7J3|G4V7J3_SCHMA Putative ubiquitin fusion degradaton protein OS=Schistosoma mansoni GN=Smp_196510 PE=4 SV=1	11	32.844	0.0822612	1.0848	0.372551	1.29464	FALSE	21.2305169068868	21.2487733560272	21.1921998562157	20.8041216637467	20.9416251210055	20.8080896855884
G4V7J7;G4V7J8	tr|G4V7J7|G4V7J7_SCHMA V-type proton ATPase subunit a OS=Schistosoma mansoni GN=Smp_040970.1 PE=3 SV=1;tr|G4V7J8|G4V7J8_SCHMA V-type proton ATPase subunit a OS=Schistosoma mansoni GN=Smp_040970.3 PE=3 SV=1	7	98.399	0.993788	0.00270635	-0.00742646	1.00516	FALSE	13.9525142594169	17.1062284028534	16.9418546141756	15.3454416746437	16.4008938094581	16.2765411749416
G4V7K0	tr|G4V7K0|G4V7K0_SCHMA RNA cytidine acetyltransferase OS=Schistosoma mansoni GN=Smp_144490 PE=3 SV=1	15	143.5	0.182542	0.738637	1.61416	3.06133	FALSE	15.1290407558453	16.6866488443934	17.6163210999751	14.4148799740335	13.3388459562242	16.8358096293301
G4V7L0	tr|G4V7L0|G4V7L0_SCHMA Uncharacterized protein OS=Schistosoma mansoni GN=Smp_163430 PE=4 SV=1	2	49.208	8.94225e-05	4.04855	2.61584	6.12981	TRUE	16.4856237120674	15.8474701921475	15.8275069394812	13.2833653882194	13.3388459562242	13.6908642669623
G4V7L5	tr|G4V7L5|G4V7L5_SCHMA Putative DNA polymerase delta small subunit OS=Schistosoma mansoni GN=Smp_076660 PE=4 SV=1	12	59.157	0.810359	0.0913228	0.0672686	1.04773	FALSE	19.0391143533868	19.20808225007	19.1772307215725	19.3318826961078	19.2965285066146	18.5942103152902
G4V7L7;G4V7L6	tr|G4V7L7|G4V7L7_SCHMA 60S ribosomal export protein NMD3 OS=Schistosoma mansoni GN=Smp_076630.1 PE=3 SV=1;tr|G4V7L6|G4V7L6_SCHMA 60S ribosomal export protein NMD3 OS=Schistosoma mansoni GN=Smp_076630.2 PE=3 SV=1	4	42.632	0.320176	0.494611	0.87959	1.83985	FALSE	14.7363996662484	14.9488478865341	16.2256891486156	13.2833653882194	16.0330766694951	13.9557252695279
G4V7M3;G4V7M2	tr|G4V7M3|G4V7M3_SCHMA Putative propionyl-CoA carboxylase alpha subunit OS=Schistosoma mansoni GN=Smp_165400.1 PE=4 SV=1;tr|G4V7M2|G4V7M2_SCHMA Putative propionyl-CoA carboxylase alpha subunit OS=Schistosoma mansoni GN=Smp_165400.3 PE=4 SV=1	4	102.14	0.00426198	2.37039	-1.1433	2.20885	TRUE	14.2552543012105	14.1308991459219	13.7208770455038	14.8872843293806	15.2871420507598	15.3624935554647
G4V7M6	tr|G4V7M6|G4V7M6_SCHMA Putative zinc finger protein OS=Schistosoma mansoni GN=Smp_165420 PE=4 SV=1	2	444.01	0.637466	0.195543	0.752603	1.68483	FALSE	13.2980158167032	13.5125371649315	13.7208770455038	14.8271031204633	14.2801265522155	9.16639138026173
G4V7M7	tr|G4V7M7|G4V7M7_SCHMA Uncharacterized protein OS=Schistosoma mansoni GN=Smp_080360 PE=4 SV=1	2	25.3	3.61745e-06	5.4416	5.69335	51.7452	TRUE	18.6868246895467	18.9623248513991	19.7439831667199	13.2833653882194	13.3388459562242	13.6908642669623
G4V7P2;G4V7P3	tr|G4V7P2|G4V7P2_SCHMA Uncharacterized protein OS=Schistosoma mansoni GN=Smp_035560.2 PE=4 SV=1;tr|G4V7P3|G4V7P3_SCHMA Uncharacterized protein OS=Schistosoma mansoni GN=Smp_035560.1 PE=4 SV=1	11	17.557	0.00110661	2.95601	-1.67549	3.19427	TRUE	24.5225526274636	24.5385856761171	24.0075702553663	26.3195945776648	26.1213164169172	25.6542628428899
G4V7P4	tr|G4V7P4|G4V7P4_SCHMA Serine/threonine-protein phosphatase OS=Schistosoma mansoni GN=Smp_035580 PE=3 SV=1	10	36.865	0.0067951	2.1678	-0.946966	1.92781	FALSE	19.65610658973	19.9966603376004	19.4611594093112	20.7567388366138	20.7344825104685	20.4636027124956
G4V7P7	tr|G4V7P7|G4V7P7_SCHMA Uncharacterized protein OS=Schistosoma mansoni GN=Smp_035620 PE=4 SV=1	4	20.262	0.511954	0.290769	0.402935	1.32219	FALSE	18.9689634677802	18.78495328677	18.6076348216268	18.5287416626639	19.4357190338704	17.1882861483607
G4V7P9	tr|G4V7P9|G4V7P9_SCHMA Uncharacterized protein OS=Schistosoma mansoni GN=Smp_141330 PE=4 SV=1	10	37.405	0.0270662	1.56757	0.945627	1.92603	FALSE	21.1504365292393	20.9087445471792	20.5110668529021	20.0171811561264	19.405137496677	20.3110490195819
G4V7Q4	tr|G4V7Q4|G4V7Q4_SCHMA Pyruvate carboxylase OS=Schistosoma mansoni GN=Smp_141360 PE=4 SV=1	31	132.3	0.115835	0.93616	-0.68663	1.60952	FALSE	18.6670231113301	19.5092750837152	19.8757844625365	20.210312605134	19.7037949360757	20.1978645816036
G4V7R0	tr|G4V7R0|G4V7R0_SCHMA Innexin OS=Schistosoma mansoni GN=inx PE=3 SV=1	3	49.12	0.163818	0.785638	-2.12206	4.35316	FALSE	12.7522238184929	17.2170114053561	13.7208770455038	16.5757872409975	15.321935982899	18.1585764516645
G4V7R2;G4V7R4;G4V7R1;G4V7R3	tr|G4V7R2|G4V7R2_SCHMA Innexin OS=Schistosoma mansoni GN=inx PE=3 SV=1;tr|G4V7R4|G4V7R4_SCHMA Innexin OS=Schistosoma mansoni GN=inx PE=3 SV=1;tr|G4V7R1|G4V7R1_SCHMA Innexin OS=Schistosoma mansoni GN=inx PE=3 SV=1;tr|G4V7R3|G4V7R3_SCHMA Innexin OS=Schistoso	14	52.475	0.09096	1.04115	-1.02534	2.03544	FALSE	19.9599548158676	20.7475981054224	20.5474977310114	21.5339678623612	20.5011268283212	22.2959770669274
G4V7R5	tr|G4V7R5|G4V7R5_SCHMA Putative calpain 4, 6, 7, invertebrate OS=Schistosoma mansoni GN=Smp_141280 PE=4 SV=1	5	43.477	4.79374e-06	5.31933	-4.86833	29.2087	TRUE	13.2980158167032	13.5125371649315	13.7208770455038	18.3198787647682	18.8666426552777	17.9498921897813
G4V7R9	tr|G4V7R9|G4V7R9_SCHMA Dolichyl-diphosphooligosaccharide--protein glycosyltransferase 48 kDa subunit OS=Schistosoma mansoni GN=Smp_035470 PE=3 SV=1	13	48.681	0.298395	0.525209	-0.31818	1.24676	FALSE	21.5269454252201	21.6662647982898	22.1091664839431	22.097760027081	22.4171840602006	21.7419729331915
G4V7S7	tr|G4V7S7|G4V7S7_SCHMA Putative nucleobindin OS=Schistosoma mansoni GN=Smp_144560 PE=4 SV=1	1	43.253	1.82041e-05	4.73983	-2.96859	7.8277	TRUE	13.2980158167032	13.5125371649315	13.7208770455038	16.5707922057592	16.6580855301556	16.2083198229494
G4V7S8	tr|G4V7S8|G4V7S8_SCHMA Serine hydroxymethyltransferase OS=Schistosoma mansoni GN=Smp_144570 PE=3 SV=1	6	55.549	0.388371	0.410753	-0.927713	1.90226	FALSE	14.3529118729025	17.1327006142146	17.6595158313854	18.2223941656739	16.2419044535972	17.4639691594945
G4V7T9	tr|G4V7T9|G4V7T9_SCHMA Putative trim56 protein OS=Schistosoma mansoni GN=Smp_054730 PE=4 SV=1	5	34.032	0.500692	0.300429	-0.523974	1.43791	FALSE	16.3472244198773	17.2618647095252	18.8000162083029	18.633765744189	17.0975785658752	18.249682586053
G4V7U0	tr|G4V7U0|G4V7U0_SCHMA Uncharacterized protein OS=Schistosoma mansoni GN=Smp_054740 PE=4 SV=1	4	35.413	0.566692	0.246653	-0.826646	1.77356	FALSE	13.2980158167032	17.7720858043388	17.7617090808815	16.0992822703107	18.2959009194439	16.9165648718523
G4V7U1	tr|G4V7U1|G4V7U1_SCHMA Putative brat protein OS=Schistosoma mansoni GN=Smp_054750 PE=4 SV=1	2	23.801	5.89336e-05	4.22964	-4.59586	24.182	TRUE	13.2980158167032	13.5125371649315	13.7208770455038	17.2339804780964	18.8576928080747	18.2273437996535
G4V7U3	tr|G4V7U3|G4V7U3_SCHMA 40S ribosomal protein S8 OS=Schistosoma mansoni GN=Smp_054780 PE=3 SV=1	16	24.857	0.931259	0.0309294	0.0954624	1.06841	FALSE	22.6077402728217	22.0435542619066	22.1089640316841	21.312359831792	20.555836003289	24.6056755344986
G4V7U4;G4V7U5	tr|G4V7U4|G4V7U4_SCHMA Putative microtubule associated protein xmap215 OS=Schistosoma mansoni GN=Smp_054790.2 PE=4 SV=1;tr|G4V7U5|G4V7U5_SCHMA Putative microtubule associated protein xmap215 OS=Schistosoma mansoni GN=Smp_054790.1 PE=4 SV=1	28	226.98	0.830754	0.0805273	-0.0672115	1.04769	FALSE	18.2398839630234	18.3365842025003	18.5153261317837	18.353367719417	17.9823991894384	18.9576618301885
G4V7U6	tr|G4V7U6|G4V7U6_SCHMA Related to multifunctional cyclin-dependent kinase-related OS=Schistosoma mansoni GN=Smp_054800 PE=4 SV=1	4	60.599	0.899014	0.0462334	-0.0352306	1.02472	FALSE	17.7528886379086	18.369689947753	18.433979269329	18.0047946789716	18.3308589595294	18.3265959055834
G4V7V0	tr|G4V7V0|G4V7V0_SCHMA Putative DNA replication licensing factor MCM2 OS=Schistosoma mansoni GN=Smp_054840 PE=3 SV=1	15	51.887	0.179027	0.74708	-0.362704	1.28583	FALSE	19.6852776151949	19.9311090992253	19.9779894284384	20.2229999219307	20.5290869096621	19.9304008920061
G4V7V1	tr|G4V7V1|G4V7V1_SCHMA Putative DNA replication licensing factor MCM2 OS=Schistosoma mansoni GN=Smp_079560 PE=4 SV=1	11	56.424	0.399357	0.398638	0.345447	1.27054	FALSE	19.9202470588692	19.7278708106689	19.7508090571802	19.2640936542301	20.2251686276612	18.8733230559813
G4V7V2	tr|G4V7V2|G4V7V2_SCHMA Uncharacterized protein OS=Schistosoma mansoni GN=Smp_079570 PE=4 SV=1	2	48.783	0.375947	0.424873	-0.778643	1.71552	FALSE	16.5762227828363	16.5490490586458	13.7208770455038	16.1999938942386	16.5548376830563	16.4272456294143
G4V7V5	tr|G4V7V5|G4V7V5_SCHMA Uncharacterized protein OS=Schistosoma mansoni GN=Smp_079600 PE=4 SV=1	2	48.27	1.51639e-05	4.81919	-3.2922	9.79607	TRUE	13.2980158167032	13.5125371649315	13.7208770455038	16.6186136367506	17.1528441538589	16.6365816086733
G4V7X4	tr|G4V7X4|G4V7X4_SCHMA Putative ctl2 OS=Schistosoma mansoni GN=Smp_160740 PE=3 SV=1	8	64.916	0.245345	0.610222	-0.48571	1.40027	FALSE	18.1852461641914	18.4023742174114	19.1540265036602	19.370200177616	19.3066483361146	18.5219289036502
G4V7X6	tr|G4V7X6|G4V7X6_SCHMA Serine/threonine kinase OS=Schistosoma mansoni GN=Smp_160760 PE=4 SV=1	6	120.98	0.000419966	3.37679	-2.54677	5.84323	TRUE	13.2980158167032	14.5129608912979	13.8334792786151	16.2284058355819	16.4514131345063	16.6049326807305
G4V7X7	tr|G4V7X7|G4V7X7_SCHMA Actin-related protein 2/3 complex subunit 4 OS=Schistosoma mansoni GN=Smp_160770.1 PE=3 SV=1	5	19.651	0.00674866	2.17078	-2.08285	4.23644	TRUE	17.6739626828489	18.1702001380582	19.4525816857374	20.9385409863973	20.3069252272371	20.2998406237802
G4V7X9	tr|G4V7X9|G4V7X9_SCHMA Adducin related protein OS=Schistosoma mansoni GN=Smp_071140 PE=4 SV=1	19	86.545	0.0122768	1.91091	-1.23438	2.3528	FALSE	17.9440328205795	18.6895139818655	19.1104534158076	20.0268279999815	19.7047058611403	19.7156002021747
G4V7Y0	tr|G4V7Y0|G4V7Y0_SCHMA Formin binding protein and related proteins OS=Schistosoma mansoni GN=Smp_071150 PE=4 SV=1	3	65.288	0.136665	0.864344	0.483863	1.39848	FALSE	15.8433415487475	15.6700446183183	15.1974497995336	15.1791395226308	15.3433311236339	14.7367772507576
G4V7Y2	tr|G4V7Y2|G4V7Y2_SCHMA Putative rna binding motif protein OS=Schistosoma mansoni GN=Smp_141240 PE=4 SV=1	4	78.675	0.96401	0.0159186	-0.0499171	1.03521	FALSE	13.2980158167032	16.2100376503733	16.2547690465518	15.9015908443319	16.2673209796589	13.7436619247527
G4V7Y4;G4V7Y3	tr|G4V7Y4|G4V7Y4_SCHMA Serine/threonine protein phosphatase 2A regulatory subunit OS=Schistosoma mansoni GN=Smp_035430.2 PE=3 SV=1;tr|G4V7Y3|G4V7Y3_SCHMA Serine/threonine protein phosphatase 2A regulatory subunit OS=Schistosoma mansoni GN=Smp_035430.1 PE=3	6	56.536	0.476653	0.321798	0.36832	1.29085	FALSE	20.0844590252821	20.1307634604615	20.0567497476495	19.648038813367	18.8215537719148	20.6974196698779
G4V7Y5	tr|G4V7Y5|G4V7Y5_SCHMA Putative mitochondrial ribosomal protein L24 OS=Schistosoma mansoni GN=Smp_035410 PE=4 SV=1	6	33.539	0.0221947	1.65375	1.5194	2.86672	FALSE	19.5316343162317	18.7462227776219	19.1043566443612	17.5509130436626	16.7685910060791	18.5045123783463
G4V7Z3;G4V7Z4	tr|G4V7Z3|G4V7Z3_SCHMA Putative snare protein sec22 OS=Schistosoma mansoni GN=Smp_035300.1 PE=3 SV=1;tr|G4V7Z4|G4V7Z4_SCHMA Putative snare protein sec22 OS=Schistosoma mansoni GN=Smp_035300.2 PE=3 SV=1	7	22.16	0.0885268	1.05293	0.684733	1.6074	FALSE	20.5972704862322	20.487925357397	20.6739744827069	20.3020357315221	20.1773826264218	19.2255519099142
G4V7Z6	tr|G4V7Z6|G4V7Z6_SCHMA Adenylyltransferase and sulfurtransferase MOCS3 OS=Schistosoma mansoni GN=Smp_035280 PE=3 SV=1	9	55.893	0.00136854	2.86374	1.76732	3.40422	TRUE	18.9342562002967	19.755916915196	19.6970007449493	17.4596368834909	17.9777110703225	17.6478551571389
G4V7Z7;G4V7Z8	tr|G4V7Z7|G4V7Z7_SCHMA Malate dehydrogenase OS=Schistosoma mansoni GN=Smp_035270.2 PE=3 SV=1;tr|G4V7Z8|G4V7Z8_SCHMA Malate dehydrogenase OS=Schistosoma mansoni GN=Smp_035270.1 PE=3 SV=1	25	36.198	0.000278292	3.5555	-1.50723	2.84265	TRUE	24.8271856058244	24.7506759822822	24.6690254548552	26.3439158729779	26.3517632403978	26.072910318103
G4V801	tr|G4V801|G4V801_SCHMA Kinesin-like protein OS=Schistosoma mansoni GN=Smp_035220 PE=3 SV=1	3	68.564	0.00691067	2.16048	-1.66682	3.17514	TRUE	13.2980158167032	13.5125371649315	13.7208770455038	14.3782558996374	15.3256211229037	15.8280197621394
G4V805;G4V804;G4V803;G4V806	tr|G4V805|G4V805_SCHMA Putative hsp40, subfamily A, members 1,2,4 OS=Schistosoma mansoni GN=Smp_035200.4 PE=3 SV=1;tr|G4V804|G4V804_SCHMA Putative hsp40, subfamily A, members 1,2,4 OS=Schistosoma mansoni GN=Smp_035200.3 PE=4 SV=1;tr|G4V803|G4V803_SCHMA Put	24	45.224	0.424241	0.372387	-0.185815	1.13746	FALSE	25.3597644074043	24.9782117068946	25.4457973820171	25.3305522861596	25.4751316197883	25.535536045562
G4V816	tr|G4V816|G4V816_SCHMA Uncharacterized protein OS=Schistosoma mansoni GN=Smp_035110 PE=3 SV=1	3	43.988	0.568471	0.245292	-0.285447	1.21879	FALSE	18.254498137552	16.9020734897422	18.4414078806749	17.7605586503055	18.2211341403619	18.4726281699038
G4V818;G4V819;G4V820	tr|G4V818|G4V818_SCHMA Putative hepatoma up-regulated protein OS=Schistosoma mansoni GN=Smp_035090.3 PE=4 SV=1;tr|G4V819|G4V819_SCHMA Putative hepatoma up-regulated protein OS=Schistosoma mansoni GN=Smp_035090.1 PE=4 SV=1;tr|G4V820|G4V820_SCHMA Putative he	4	87.026	0.0814392	1.08917	-1.87947	3.67939	FALSE	15.9402436246422	13.5125371649315	16.9956879693677	16.9584038784927	17.5380781499311	17.5903863679163
G4V823	tr|G4V823|G4V823_SCHMA Putative phospholipase DDHD1 OS=Schistosoma mansoni GN=Smp_141150 PE=4 SV=1	2	83.678	0.000507673	3.29442	-2.69792	6.48865	TRUE	16.586619281195	15.7799807476563	15.3825313431831	18.5801167364544	19.0053011840222	18.2574702629335
G4V825	tr|G4V825|G4V825_SCHMA Putative atp-dependent RNA helicase OS=Schistosoma mansoni GN=Smp_035030 PE=4 SV=1	40	145.19	0.883793	0.0536492	-0.0815838	1.05818	FALSE	20.0889270509636	20.5355575037941	21.1392566918685	20.6236033943007	19.7834252759715	21.6014640475174
G4V830	tr|G4V830|G4V830_SCHMA Putative tfiid subunit OS=Schistosoma mansoni GN=Smp_141140 PE=4 SV=1	4	38.752	0.0475067	1.32324	1.35978	2.56646	FALSE	14.494793837163	15.3978306721887	15.9140022666482	14.8126418180727	13.3388459562242	13.5757923630573
G4V838;G4V839;G4V840;O17460;O17459	tr|G4V838|G4V838_SCHMA Uncharacterized protein OS=Schistosoma mansoni GN=Smp_034940.1 PE=4 SV=1;tr|G4V839|G4V839_SCHMA Uncharacterized protein OS=Schistosoma mansoni GN=Smp_034940.2 PE=4 SV=1;tr|G4V840|G4V840_SCHMA Uncharacterized protein OS=Schistosoma ma	25	88.594	0.0171237	1.7664	1.26023	2.39533	FALSE	20.953341992796	20.8172310523558	20.861203543405	19.4428563612779	19.0184359848242	20.3898057242089
G4V841	tr|G4V841|G4V841_SCHMA Putative DNAj (Hsp40) homolog, subfamily B, member OS=Schistosoma mansoni GN=Smp_141080 PE=4 SV=1	8	41.95	0.00374205	2.42689	-0.950165	1.93209	FALSE	20.6032990939752	20.3049360344579	20.299136901774	21.260363702004	21.5095718965775	21.2879313368501
G4V842	tr|G4V842|G4V842_SCHMA Putative dynein heavy chain OS=Schistosoma mansoni GN=Smp_034920 PE=4 SV=1	12	414.92	0.0137854	1.86058	-2.20202	4.60123	FALSE	13.2980158167032	12.1594561363572	11.8895897906272	14.2301424782414	13.912659208413	15.8103158859301
G4V844	tr|G4V844|G4V844_SCHMA AP complex subunit beta OS=Schistosoma mansoni GN=Smp_034870 PE=3 SV=1	17	95.869	0.00172338	2.76362	-1.0575	2.08133	TRUE	18.948795660001	19.1352874980196	18.8606841835719	20.0505203660954	20.1394063630012	19.9273529782226
G4V848	tr|G4V848|G4V848_SCHMA Mps one binder kinase activator-like 2 (Mob1 homolog 2) (Protein mob3) OS=Schistosoma mansoni GN=Smp_095470 PE=4 SV=1	4	25.701	0.937659	0.0279553	-0.0396846	1.02789	FALSE	17.6189072350587	19.1717554013076	18.2048647712	18.3479827497892	17.8566529142635	18.9099454885529
G4V867	tr|G4V867|G4V867_SCHMA Putative cop-coated vesicle membrane protein P24 (Emp24/gp25l family) OS=Schistosoma mansoni GN=Smp_154960.1 PE=3 SV=1	4	25.013	0.0313022	1.50442	-0.62405	1.5412	FALSE	21.3217916321916	21.3228632449313	21.7615854442675	22.1941184043404	22.1393091867351	21.9449613543453
G4V872	tr|G4V872|G4V872_SCHMA Uncharacterized protein OS=Schistosoma mansoni GN=Smp_086060 PE=4 SV=1	3	13.731	0.442767	0.353825	-0.991779	1.98864	FALSE	14.2789369350396	18.9839739940963	17.8135169830311	18.0925700799174	18.3562316123417	17.6029621893487
G4V876	tr|G4V876|G4V876_SCHMA Synaptosomal-associated protein OS=Schistosoma mansoni GN=Smp_164210 PE=3 SV=1	3	22.52	8.01513e-05	4.09609	3.24881	9.50582	TRUE	20.5459832161873	20.2864570093395	20.2851563598556	17.7762093417091	16.8203258637718	16.7746279301439
G4V882	tr|G4V882|G4V882_SCHMA Putative rrm/rnp domain OS=Schistosoma mansoni GN=Smp_088550 PE=4 SV=1	7	130.71	0.0342416	1.46545	2.10752	4.30949	FALSE	16.4467062851606	16.5472201796441	16.7032240041417	13.8177472783109	13.3388459562242	16.218008011577
G4V884	tr|G4V884|G4V884_SCHMA Uncharacterized protein OS=Schistosoma mansoni GN=Smp_006780 PE=4 SV=1	7	23.231	0.114115	0.942658	0.540568	1.45454	FALSE	20.9639478852335	21.0782691173318	20.9937769870134	20.6609974312518	20.8303768345059	19.9229170977958
G4V889;G4V888;G4V890	tr|G4V889|G4V889_SCHMA Uncharacterized protein OS=Schistosoma mansoni GN=Smp_006830.1 PE=4 SV=1;tr|G4V888|G4V888_SCHMA Uncharacterized protein OS=Schistosoma mansoni GN=Smp_006830.3 PE=4 SV=1;tr|G4V890|G4V890_SCHMA Uncharacterized protein OS=Schistosoma ma	5	25.153	0.32339	0.490273	0.253502	1.1921	FALSE	21.3465486135842	20.8920444451997	20.7174360121084	20.6588883677558	20.762345127143	20.7742887055014
G4V895;G4V896	tr|G4V895|G4V895_SCHMA Uncharacterized protein OS=Schistosoma mansoni GN=Smp_006860.2 PE=4 SV=1;tr|G4V896|G4V896_SCHMA Uncharacterized protein OS=Schistosoma mansoni GN=Smp_006860.1 PE=4 SV=1	4	20.938	0.176088	0.754271	0.753462	1.68583	FALSE	18.6941987962106	18.8103792454274	17.2111557784118	17.8617369147383	17.2350723895633	17.3585396696817
G4V8A5	tr|G4V8A5|G4V8A5_SCHMA Putative spectrin beta chain, brain 4 (Spectrin, non-erythroid beta chain 4) (Beta-V spectrin) (BSPECV) OS=Schistosoma mansoni GN=Smp_196570 PE=4 SV=1	119	282.37	0.00121402	2.91578	-1.11579	2.16713	TRUE	22.0010007690555	21.9803815655898	21.928645521697	22.9371177162413	23.2489463190951	23.0713245260497
G4V8A7	tr|G4V8A7|G4V8A7_SCHMA Putative collagen alpha-1(V) chain OS=Schistosoma mansoni GN=Smp_170330 PE=3 SV=1	5	295.97	0.00232529	2.63352	-2.43665	5.41383	TRUE	13.7874043450185	14.1903633496007	14.0623816157288	17.4392264887741	16.1908880194982	15.7199841968023
G4V8A8	tr|G4V8A8|G4V8A8_SCHMA Putative collagen alpha-1(V) chain OS=Schistosoma mansoni GN=Smp_170340 PE=3 SV=1	7	176.75	0.000975488	3.01078	-1.68643	3.21859	TRUE	16.6876265813172	16.6948011712752	17.1511349523511	18.9101277814112	18.4735599948647	18.2091620456435
G4V8B3	tr|G4V8B3|G4V8B3_SCHMA Uncharacterized protein OS=Schistosoma mansoni GN=Smp_020450 PE=4 SV=1	10	55.41	0.276347	0.558545	-0.293929	1.22597	FALSE	20.4464665694026	20.2570109889809	20.0861241414819	20.4496748237676	20.9083286571535	20.3133857345454
G4V8B4	tr|G4V8B4|G4V8B4_SCHMA Putative arginyl-tRNA synthetase OS=Schistosoma mansoni GN=Smp_133280 PE=3 SV=1	29	71.361	0.138023	0.860047	0.377904	1.29945	FALSE	22.1449071057359	22.1425879068503	22.2101293144475	21.8708546390403	22.0165820058498	21.4764742004338
G4V8B5	tr|G4V8B5|G4V8B5_SCHMA Sel-1-like protein, sel-1l OS=Schistosoma mansoni GN=Smp_133270 PE=4 SV=1	12	87.214	0.0350199	1.45568	-1.4636	2.75796	FALSE	16.5918308572509	17.6580836480317	18.6746531353286	18.94740737185	19.2166954147499	19.1512631384913
G4V8C2	tr|G4V8C2|G4V8C2_SCHMA Reticulon-like protein OS=Schistosoma mansoni GN=Smp_020370 PE=4 SV=1	4	24.279	0.00455333	2.34167	-0.865187	1.82158	FALSE	20.4487479615221	20.3863479202521	20.7039876958076	21.4325678614889	21.3217304691581	21.3803458649016
G4V8C4;G4V8C5	tr|G4V8C4|G4V8C4_SCHMA Putative alpha-glucosidase OS=Schistosoma mansoni GN=Smp_020340 PE=3 SV=1;tr|G4V8C5|G4V8C5_SCHMA Putative alpha-glucosidase OS=Schistosoma mansoni GN=Smp_133210 PE=3 SV=1	7	101.57	0.0190808	1.7194	-2.3768	5.19382	FALSE	13.2980158167032	12.8204002332822	14.7593334046758	15.7676462051096	15.0415984083347	17.198892322315
G4V8C7	tr|G4V8C7|G4V8C7_SCHMA ATP-dependent Clp protease proteolytic subunit OS=Schistosoma mansoni GN=Smp_210400 PE=3 SV=1	2	27.948	0.119243	0.923568	0.341873	1.2674	FALSE	19.6514592695178	19.6027490672629	19.4584414401934	19.3559264461431	19.1696639396335	19.161441219715
G4V8C8	tr|G4V8C8|G4V8C8_SCHMA Peptidase Clp (S14 family) OS=Schistosoma mansoni GN=Smp_210410 PE=4 SV=1	6	36.186	0.354934	0.449852	1.02837	2.03972	FALSE	18.6716206449305	19.7637349760344	18.5849424035295	19.2372738338788	19.0160669806083	15.6818476068533
G4V8D3	tr|G4V8D3|G4V8D3_SCHMA Uncharacterized protein OS=Schistosoma mansoni GN=Smp_020210 PE=4 SV=1	2	67.318	0.1926	0.715345	-1.99781	3.99394	FALSE	13.2980158167032	18.26438485596	13.7208770455038	17.5852950387283	17.0722835295174	16.6191388177871
G4V8D5;G4V8D6	tr|G4V8D5|G4V8D5_SCHMA Putative zeta-coat protein OS=Schistosoma mansoni GN=Smp_020220.1 PE=4 SV=1;tr|G4V8D6|G4V8D6_SCHMA Putative zeta-coat protein OS=Schistosoma mansoni GN=Smp_020220.2 PE=4 SV=1	3	19.502	0.257361	0.589458	0.335928	1.26219	FALSE	21.8417843612471	21.4628808381721	21.0851199892801	21.2516963015221	21.2246191342092	20.9056854953294
G4V8E5;G4V8E4	tr|G4V8E5|G4V8E5_SCHMA Putative dead box ATP-dependent RNA helicase OS=Schistosoma mansoni GN=Smp_133120.2 PE=4 SV=1;tr|G4V8E4|G4V8E4_SCHMA Putative dead box ATP-dependent RNA helicase OS=Schistosoma mansoni GN=Smp_133120.1 PE=4 SV=1	19	100.52	0.641021	0.193127	0.991984	1.98892	FALSE	17.0941538952324	15.6231105628123	18.5943214401106	14.414104149034	13.3388459562242	20.5826829347293
G4V8F5	tr|G4V8F5|G4V8F5_SCHMA Rhomboid-like protein OS=Schistosoma mansoni GN=Smp_020090 PE=3 SV=1	2	44.756	0.0652815	1.18521	-2.04292	4.12079	FALSE	16.6604240618329	13.5125371649315	13.7208770455038	16.5464395670833	17.2503177037433	16.2258400423364
G4V8F9	tr|G4V8F9|G4V8F9_SCHMA Uncharacterized protein OS=Schistosoma mansoni GN=Smp_020060 PE=4 SV=1	9	75.327	0.0066576	2.17668	-0.927515	1.902	FALSE	18.8706364309043	18.5252530858057	18.5397561706043	19.683304326256	19.7210049187292	19.3138827404053
G4V8G0	tr|G4V8G0|G4V8G0_SCHMA Putative cop9 signalosome complex subunit OS=Schistosoma mansoni GN=Smp_020050 PE=4 SV=1	11	51.839	0.873926	0.0585255	-0.0422845	1.02974	FALSE	20.0944198408833	20.1062037563562	19.7874205718016	20.0529559527239	20.3764023716585	19.6855393688204
G4V8G2;G4V8G1	tr|G4V8G2|G4V8G2_SCHMA Uncharacterized protein OS=Schistosoma mansoni GN=Smp_020040.2 PE=3 SV=1;tr|G4V8G1|G4V8G1_SCHMA Uncharacterized protein OS=Schistosoma mansoni GN=Smp_020040.1 PE=3 SV=1	11	42.117	0.148123	0.829378	-0.336539	1.26272	FALSE	20.9147701315733	20.7107095749646	20.6973239655266	21.1323513093543	21.277793007251	20.922275230692
G4V8G8	tr|G4V8G8|G4V8G8_SCHMA Putative syntaxin OS=Schistosoma mansoni GN=Smp_019890 PE=3 SV=1	7	29.962	1.20488e-07	6.91906	6.84499	114.96	TRUE	20.4430377025696	20.0880985268229	20.3169150803042	13.2833653882194	13.3388459562242	13.6908642669623
G4V8H1	tr|G4V8H1|G4V8H1_SCHMA Putative p38 MAPk OS=Schistosoma mansoni GN=Smp_191040 PE=4 SV=1	1	10.145	0.107187	0.969858	-2.67044	6.36622	FALSE	13.2980158167032	18.5214877016624	18.0378845330219	19.2655896592884	19.4939702472954	19.1091405343911
G4V8H2	tr|G4V8H2|G4V8H2_SCHMA Putative lung seven transmembrane receptor OS=Schistosoma mansoni GN=Smp_170350 PE=4 SV=1	1	39.826	0.0783768	1.10581	-1.77669	3.42639	FALSE	13.2980158167032	15.3872569295116	16.5760739136288	16.8027098548043	16.5637630360877	17.2249434413144
G4V8H4	tr|G4V8H4|G4V8H4_SCHMA Putative abc1 family OS=Schistosoma mansoni GN=Smp_021330.2 PE=4 SV=1	5	67.77	0.647078	0.189044	-0.244878	1.18499	FALSE	16.8466671691013	17.0656371183979	17.9844311480644	17.820979342857	16.6548696249454	18.1555211380632
G4V8H7	tr|G4V8H7|G4V8H7_SCHMA Putative importin 7 OS=Schistosoma mansoni GN=Smp_133710 PE=4 SV=1	14	61.683	0.139379	0.855802	0.315352	1.24432	FALSE	21.1249843425044	21.1368084497837	21.3061473364116	20.9669737639424	20.8521222149192	20.8027881147276
G4V8I1	tr|G4V8I1|G4V8I1_SCHMA Putative udp-glucose glycoprotein:glucosyltransferase OS=Schistosoma mansoni GN=Smp_133700 PE=4 SV=1	23	189.18	0.0315452	1.50107	-1.22067	2.33055	FALSE	16.0468229191397	17.1922407335907	17.3962513828602	17.8512072242767	17.8987162491565	18.5474095636782
G4V8J1	tr|G4V8J1|G4V8J1_SCHMA Uncharacterized protein OS=Schistosoma mansoni GN=Smp_148060 PE=4 SV=1	3	17.186	1.60993e-05	4.79319	3.27723	9.69492	TRUE	16.9490374187013	16.8216208078626	16.3741025536177	13.2833653882194	13.3388459562242	13.6908642669623
G4V8K6;G4V8K4;G4V8K7;G4V8K5;G4V8K2;G4V8K3	tr|G4V8K6|G4V8K6_SCHMA Uncharacterized protein OS=Schistosoma mansoni GN=Smp_090930.2 PE=4 SV=1;tr|G4V8K4|G4V8K4_SCHMA Uncharacterized protein OS=Schistosoma mansoni GN=Smp_090930.7 PE=4 SV=1;tr|G4V8K7|G4V8K7_SCHMA Uncharacterized protein OS=Schistosoma ma	4	66.181	5.85901e-05	4.23218	4.28383	19.4787	TRUE	18.2669632249001	16.8738609070674	18.0237266042684	13.2833653882194	13.3388459562242	13.6908642669623
G4V8K8	tr|G4V8K8|G4V8K8_SCHMA Putative mitochondrial 28S ribosomal protein S14 (S14mt) OS=Schistosoma mansoni GN=Smp_090920.1 PE=4 SV=1	2	25.21	0.132885	0.876526	1.65276	3.14434	FALSE	16.9188283481477	17.1419629160702	17.2697065889763	15.9330891108588	13.3388459562242	17.100297519654
G4V8L1	tr|G4V8L1|G4V8L1_SCHMA Uncharacterized protein OS=Schistosoma mansoni GN=Smp_090870 PE=4 SV=1	9	96.66	0.12026	0.919879	-0.670765	1.59192	FALSE	17.6501711930934	18.2551227171099	18.775122346641	18.4654993607394	19.0880508453757	19.139161270149
G4V8L2	tr|G4V8L2|G4V8L2_SCHMA Uncharacterized protein OS=Schistosoma mansoni GN=Smp_090860 PE=4 SV=1	18	55.655	0.0195989	1.70777	0.641532	1.55998	FALSE	21.5092934068581	21.5185275671725	21.2992788643858	20.7125613443016	20.9980171696961	20.6919263255432
G4V8L4	tr|G4V8L4|G4V8L4_SCHMA Putative heat shock protein 70 OS=Schistosoma mansoni GN=Smp_106930 PE=3 SV=1	1	69.858	0.7729	0.111877	0.145491	1.10611	FALSE	21.8688699478531	22.4829036574418	22.4952294931033	21.8895895985019	21.424778682171	23.096162079266
G4V8L9	tr|G4V8L9|G4V8L9_SCHMA Histone H2A OS=Schistosoma mansoni GN=Smp_086860 PE=3 SV=1	2	14.577	0.012704	1.89606	-0.927772	1.90234	FALSE	22.2045955266748	21.7401525341671	21.4895797710377	22.6130454776968	22.6574993790917	22.9470988246602
G4V8M3;G4V8M2;G4V8M4	tr|G4V8M3|G4V8M3_SCHMA Uncharacterized protein OS=Schistosoma mansoni GN=Smp_019940.1 PE=4 SV=1;tr|G4V8M2|G4V8M2_SCHMA Uncharacterized protein OS=Schistosoma mansoni GN=Smp_019940.5 PE=4 SV=1;tr|G4V8M4|G4V8M4_SCHMA Uncharacterized protein OS=Schistosoma ma	2	40.527	0.0143236	1.84395	-1.05295	2.07477	FALSE	16.637046731104	16.6066743907019	16.5027372441787	18.0262133235895	17.8294134321056	17.0496914018383
G4V8N2	tr|G4V8N2|G4V8N2_SCHMA Uncharacterized protein OS=Schistosoma mansoni GN=Smp_172800 PE=4 SV=1	4	39.309	0.213139	0.671338	1.77668	3.42637	FALSE	19.2294391860763	18.0285079263419	17.8045838582611	17.8982572338895	18.1433655834668	13.6908642669623
G4V8N4	tr|G4V8N4|G4V8N4_SCHMA Peptidyl-prolyl cis-trans isomerase OS=Schistosoma mansoni GN=Smp_210750 PE=4 SV=1	4	15.148	0.734594	0.133953	-0.11374	1.08203	FALSE	20.144467353533	19.8598520011415	19.2035911359787	19.9374868470541	20.078676015468	19.5329671751026
G4V8N6	tr|G4V8N6|G4V8N6_SCHMA DNA-directed RNA polymerase III subunit RPC6 OS=Schistosoma mansoni GN=Smp_165980 PE=3 SV=1	3	34.31	0.955043	0.0199769	-0.0561649	1.0397	FALSE	16.9841738384825	17.0160210533522	13.7208770455038	16.2369311265486	16.2398949672378	15.4127404353635
G4V8N7	tr|G4V8N7|G4V8N7_SCHMA Putative acidic fibroblast growth factor intracellular binding protein OS=Schistosoma mansoni GN=Smp_165970 PE=4 SV=1	2	94.791	0.0115157	1.93871	-2.19046	4.56452	FALSE	13.2980158167032	13.5125371649315	13.7208770455038	16.3747711273129	14.3400878962488	16.3879616223107
G4V8P0	tr|G4V8P0|G4V8P0_SCHMA Dcp1 related OS=Schistosoma mansoni GN=Smp_165960 PE=4 SV=1	12	55.878	0.00607235	2.21664	-1.03559	2.04995	TRUE	20.1581074364096	19.8555185691746	19.8507612844485	20.9282831884482	21.3341229768513	20.7087449027904
G4V8Q2	tr|G4V8Q2|G4V8Q2_SCHMA Uncharacterized protein OS=Schistosoma mansoni GN=Smp_131790 PE=4 SV=1	2	8.0832	0.357722	0.446454	0.622253	1.53928	FALSE	18.9445583115572	20.5439521858669	20.148458249771	18.5012103130903	20.2884653518768	18.9805330910713
G4V8Q3;G4V8Q4	tr|G4V8Q3|G4V8Q3_SCHMA Putative developmentally regulated GTP-binding protein 1 (Drg 1) OS=Schistosoma mansoni GN=Smp_173180.2 PE=4 SV=1;tr|G4V8Q4|G4V8Q4_SCHMA Putative developmentally regulated GTP-binding protein 1 (Drg 1) OS=Schistosoma mansoni GN=Smp_1	13	46.257	0.00951704	2.0215	0.715397	1.64194	FALSE	21.4013163889314	21.5180181818312	21.3462044543462	20.5745401025912	20.7222510982695	20.8225561140757
G4V8Q5	tr|G4V8Q5|G4V8Q5_SCHMA Actin-related protein 10, arp10 OS=Schistosoma mansoni GN=Smp_093230 PE=3 SV=1	6	45.674	0.0941258	1.02629	-0.60691	1.52299	FALSE	18.6021978684208	17.7753134502287	18.0842304840716	18.7620122954677	19.0673070730966	18.4531538337414
G4V8Q6	tr|G4V8Q6|G4V8Q6_SCHMA Uncharacterized protein OS=Schistosoma mansoni GN=Smp_093220 PE=4 SV=1	15	74.223	0.767825	0.114738	0.0866247	1.06188	FALSE	20.0975128649569	20.7932437780539	20.3015483684084	20.4411466985104	19.9823847433469	20.5088994151408
G4V8Q8	tr|G4V8Q8|G4V8Q8_SCHMA Uncharacterized protein Smp_200410 OS=Schistosoma mansoni GN=Smp_200410 PE=3 SV=1	16	36.738	0.694136	0.158555	0.0830018	1.05922	FALSE	23.8971801847138	23.7936838370193	23.6887340578642	23.7091990284625	23.8959005234273	23.5254931045927
G4V8R1	tr|G4V8R1|G4V8R1_SCHMA Uncharacterized protein OS=Schistosoma mansoni GN=Smp_208090 PE=4 SV=1	3	91.022	0.0147775	1.8304	4.08767	17.0024	FALSE	22.2348197573449	17.9262869642245	22.0809147197015	16.7658419458139	16.4574952965886	16.7556848240834
G4V8R2;G4V8R3	tr|G4V8R2|G4V8R2_SCHMA Uncharacterized protein OS=Schistosoma mansoni GN=Smp_024500.4 PE=4 SV=1;tr|G4V8R3|G4V8R3_SCHMA Uncharacterized protein OS=Schistosoma mansoni GN=Smp_024500.1 PE=4 SV=1	3	33.592	0.254733	0.593915	-0.828129	1.77538	FALSE	17.9451644095541	16.4872101224713	15.8431396956201	18.3749580250838	16.8731396041744	17.5118035847415
G4V8R6	tr|G4V8R6|G4V8R6_SCHMA Family S9 non-peptidase homologue (S09 family) OS=Schistosoma mansoni GN=Smp_210830 PE=4 SV=1	3	11.837	0.118916	0.924758	0.545947	1.45998	FALSE	20.9700161167275	20.5527505168023	20.0954735781468	19.9467369453075	20.2679895646902	19.7656719708752
G4V8R7	tr|G4V8R7|G4V8R7_SCHMA Family S9 non-peptidase homologue (S09 family) OS=Schistosoma mansoni GN=Smp_210840 PE=4 SV=1	3	61.315	0.454955	0.342031	-0.309208	1.23903	FALSE	13.6885071824929	13.5125371649315	13.7208770455038	13.2156340037359	14.0016509448634	14.6322599641948
G4V8R9	tr|G4V8R9|G4V8R9_SCHMA Putative nucleolar protein family A member OS=Schistosoma mansoni GN=Smp_098330 PE=4 SV=1	2	16.706	0.0292073	1.53451	1.00142	2.00197	FALSE	21.9741299626274	21.6001612414099	21.2145770779919	20.8602135302222	20.9050554260035	20.0193362217736
G4V8S1;G4V8S0	tr|G4V8S1|G4V8S1_SCHMA Non-specific serine/threonine protein kinase OS=Schistosoma mansoni GN=Smp_014170.1 PE=4 SV=1;tr|G4V8S0|G4V8S0_SCHMA Non-specific serine/threonine protein kinase OS=Schistosoma mansoni GN=Smp_014170.2 PE=4 SV=1	4	98.946	0.045757	1.33954	-1.02314	2.03234	FALSE	13.2980158167032	13.5125371649315	13.7208770455038	13.8781361249765	14.4056072902293	15.3171076093057
G4V8T2;G4VB03	tr|G4V8T2|G4V8T2_SCHMA Uncharacterized protein OS=Schistosoma mansoni GN=Smp_014270 PE=4 SV=1;tr|G4VB03|G4VB03_SCHMA Uncharacterized protein OS=Schistosoma mansoni GN=Smp_007300 PE=4 SV=1	1	10.855	0.444122	0.352498	-0.788475	1.72725	FALSE	20.6012496289538	16.9257284511747	19.7070512668355	19.9544697925205	20.2492615228403	19.3957223611249
G4V8U2;G4V8U3;G4V8U1	tr|G4V8U2|G4V8U2_SCHMA Uncharacterized protein OS=Schistosoma mansoni GN=Smp_097240.1 PE=3 SV=1;tr|G4V8U3|G4V8U3_SCHMA Uncharacterized protein OS=Schistosoma mansoni GN=Smp_097240.2 PE=3 SV=1;tr|G4V8U1|G4V8U1_SCHMA Uncharacterized protein OS=Schistosoma ma	10	34.423	0.330114	0.481336	0.368798	1.29128	FALSE	20.0602500235326	20.6651777703581	19.429213107864	19.6340520732583	19.7959566747313	19.6182367295508
G4V8U5	tr|G4V8U5|G4V8U5_SCHMA GTP-binding protein-related OS=Schistosoma mansoni GN=Smp_147850 PE=4 SV=1	7	81.406	0.388788	0.410287	0.777605	1.71428	FALSE	14.5714988673533	14.3822177083492	16.7892370919003	13.2833653882194	15.2605132004793	14.8662594829204
G4V8U8	tr|G4V8U8|G4V8U8_SCHMA Uncharacterized protein OS=Schistosoma mansoni GN=Smp_147870 PE=3 SV=1	5	93.093	0.143968	0.841734	1.37654	2.59645	FALSE	16.7447791155495	16.9102275300484	17.2175396616872	16.6078401117474	16.4442147943318	13.6908642669623
G4V8U9	tr|G4V8U9|G4V8U9_SCHMA Uncharacterized protein OS=Schistosoma mansoni GN=Smp_147880 PE=4 SV=1	2	25.412	4.29353e-05	4.36719	-4.50402	22.6906	TRUE	13.2980158167032	13.5125371649315	13.7208770455038	18.5292455435844	18.348944467995	17.1653021588558
G4V8V0	tr|G4V8V0|G4V8V0_SCHMA Putative rootletin (Ciliary rootlet coiled-coil protein) (Fragment) OS=Schistosoma mansoni GN=Smp_147890 PE=4 SV=1	37	223.26	1.40824e-05	4.85132	-4.77295	27.3401	TRUE	14.6641790088363	13.6566707251785	13.7208770455038	18.509859794535	19.1242981067788	18.7264108700084
G4V8V4	tr|G4V8V4|G4V8V4_SCHMA Putative acyl-coenzyme A binding domain containing (Fragment) OS=Schistosoma mansoni GN=Smp_147930 PE=4 SV=1	3	27.661	0.0160115	1.79557	1.5942	3.01927	FALSE	19.5019245257173	18.7152089472533	18.094541356294	17.2679230176897	17.7115195273161	16.5496363996029
G4V8V7	tr|G4V8V7|G4V8V7_SCHMA Putative bromodomain-containing protein 3, brd3 OS=Schistosoma mansoni GN=Smp_147950 PE=4 SV=1	9	77.649	0.531273	0.274682	-0.131095	1.09512	FALSE	18.0956396481016	18.1011917788458	18.2226983621867	18.3878884595518	18.3648569527716	18.0600705476183
G4V8W2	tr|G4V8W2|G4V8W2_SCHMA Putative high-affinity copper uptake protein OS=Schistosoma mansoni GN=Smp_048230 PE=4 SV=1	2	22.516	0.236598	0.625989	-0.973013	1.96294	FALSE	18.5361471069611	18.7067488894061	18.5205960782651	18.6444773025398	18.7617055824287	21.2763479991126
G4V8W3	tr|G4V8W3|G4V8W3_SCHMA Putative mannose-1-phosphate guanyltransferase OS=Schistosoma mansoni GN=Smp_048240 PE=4 SV=1	7	51.475	0.571099	0.243288	-0.231585	1.17412	FALSE	17.2221892798784	16.9702816841532	18.2982280101168	17.8796736409612	17.6313153147257	17.6744637682184
G4V8W8;G4V8W9	tr|G4V8W8|G4V8W8_SCHMA Putative n-acetyltransferase OS=Schistosoma mansoni GN=Smp_048260.2 PE=4 SV=1;tr|G4V8W9|G4V8W9_SCHMA Putative n-acetyltransferase OS=Schistosoma mansoni GN=Smp_048260.1 PE=4 SV=1	6	24.472	0.00134718	2.87057	1.1732	2.25511	TRUE	20.4608077336168	20.5323510045265	20.1181831807191	19.1998180651758	19.1748564569077	19.2170743221218
G4V8X7;P12812;A0A0R5RJC3;G4V8Y7	tr|G4V8X7|G4V8X7_SCHMA Putative heat shock protein-HSP20/alpha crystallin family OS=Schistosoma mansoni GN=Smp_049250 PE=3 SV=1;sp|P12812|P40_SCHMA Major egg antigen OS=Schistosoma mansoni PE=2 SV=1;tr|A0A0R5RJC3|A0A0R5RJC3_SCHMA Hsp20 (Fragment) OS=Schist	14	37.034	0.000316561	3.49954	-1.63632	3.10871	TRUE	23.4574128226492	23.5038689800413	23.1971793755065	24.9365572478629	25.256999900356	24.8738517388354
G4V8X8	tr|G4V8X8|G4V8X8_SCHMA Putative heat shock protein hsp16 OS=Schistosoma mansoni GN=Smp_148530 PE=3 SV=1	23	77.835	0.00348629	2.45764	-1.06142	2.08698	TRUE	21.608792648256	21.5604615030742	21.2007365381702	22.5689180035094	22.6794523449558	22.3058721725127
G4V8X9	tr|G4V8X9|G4V8X9_SCHMA Putative heat shock protein OS=Schistosoma mansoni GN=Smp_049270 PE=3 SV=1	8	52.245	0.151962	0.818266	0.552998	1.46713	FALSE	20.4136315273192	20.3283672972512	19.9786632618502	19.6802827106142	19.1394840993015	20.2419001294799
G4V8Y1	tr|G4V8Y1|G4V8Y1_SCHMA Elongation factor Ts, mitochondrial OS=Schistosoma mansoni GN=Smp_148540 PE=3 SV=1	13	34.911	0.691179	0.160409	0.126707	1.0918	FALSE	20.5304500584546	20.9111448037218	20.7369571424592	20.8160436411483	20.9355195692962	20.0468674853256
G4V8Y8	tr|G4V8Y8|G4V8Y8_SCHMA Phosphatidate cytidylyltransferase, mitochondrial OS=Schistosoma mansoni GN=Smp_148560.1 PE=3 SV=1	11	42.954	0.405427	0.392088	-0.315004	1.24401	FALSE	19.9728326417065	19.4367276113829	19.7469422429798	20.4260437207057	19.3724392236896	20.303030244057
G4V904	tr|G4V904|G4V904_SCHMA Putative atp-dependent transporter OS=Schistosoma mansoni GN=Smp_049500 PE=4 SV=1	9	81.9	0.178269	0.748925	1.37015	2.58498	FALSE	17.4652373795312	18.6136611576783	18.6490383102709	18.0569026053209	14.9286775240488	17.6319024632536
G4V906;Q26544	tr|G4V906|G4V906_SCHMA Putative wd repeat protein SL1-17 OS=Schistosoma mansoni GN=Smp_049520 PE=4 SV=1;sp|Q26544|WSL17_SCHMA WD repeat-containing protein SL1-17 OS=Schistosoma mansoni PE=2 SV=1	11	32.998	0.00522718	2.28173	-1.65478	3.14875	TRUE	19.1834321635688	19.5338910136118	20.4860919899274	21.2678056006286	21.6206626109113	21.2792814838997
G4V910	tr|G4V910|G4V910_SCHMA Putative heat shock protein 70 (Hsp70) OS=Schistosoma mansoni GN=Smp_049550 PE=3 SV=1	38	71.237	0.0175705	1.75522	-0.679665	1.60177	FALSE	24.8394633550876	24.7072100405345	24.875746384648	25.4197824836036	25.7310743882338	25.3105585828649
G4V912	tr|G4V912|G4V912_SCHMA Serine/threonine kinase OS=Schistosoma mansoni GN=Smp_148690 PE=4 SV=1	31	262.1	0.017174	1.76513	-3.80471	13.9743	FALSE	13.2372706112593	12.4325647931099	13.6149275053206	15.9541070669616	15.2372629470089	19.5075175547483
G4V913	tr|G4V913|G4V913_SCHMA Uncharacterized protein OS=Schistosoma mansoni GN=Smp_175570 PE=4 SV=1	5	24.801	0.971762	0.0124403	0.00684791	1.00476	FALSE	20.8195894562008	20.8301963219257	21.0557585452464	20.9021529024337	20.8522012688681	20.9306464111505
G4V916	tr|G4V916|G4V916_SCHMA Mitochondrial genome maintenance exonuclease 1 OS=Schistosoma mansoni GN=Smp_097280 PE=3 SV=1	7	29.558	0.00086372	3.06363	2.05855	4.16568	TRUE	19.0201019213779	18.953008913276	18.7587388738692	16.6554946182861	17.4844133820114	16.416290663247
G4V917	tr|G4V917|G4V917_SCHMA Ribosomal protein related OS=Schistosoma mansoni GN=Smp_102820 PE=4 SV=1	4	21.7	0.0189539	1.7223	1.68886	3.22402	FALSE	19.0202169764753	19.1065487690081	19.5464695146907	17.7618931993169	16.4541157798914	18.3906483657092
G4V920	tr|G4V920|G4V920_SCHMA Putative mitochondrial ribosome protein OS=Schistosoma mansoni GN=Smp_034430.1 PE=4 SV=1	4	21.841	0.000289069	3.539	1.8461	3.59528	TRUE	18.7326691487194	19.0297298993454	18.4683739754046	16.9802714396484	16.6791582602215	17.033030324342
G4V924	tr|G4V924|G4V924_SCHMA Ferrochelatase OS=Schistosoma mansoni GN=Smp_140790 PE=3 SV=1	6	47.814	0.20284	0.692845	0.28726	1.22032	FALSE	18.8016736080829	18.736415289157	18.6268118223461	18.6394815561821	18.3995442673229	18.2640943048191
G4V926	tr|G4V926|G4V926_SCHMA Proteasome catalytic subunit 1 (T01 family) OS=Schistosoma mansoni GN=Smp_034490 PE=4 SV=1	8	24.485	0.982696	0.00758097	-0.00552368	1.00384	FALSE	22.5153601718585	22.6786449506882	22.3855805424643	22.6968238234044	22.743631109554	22.1557017829326
G4V931;G4V930	tr|G4V931|G4V931_SCHMA Putative histone acetyltransferase type B catalytic subunit OS=Schistosoma mansoni GN=Smp_178700.1 PE=4 SV=1;tr|G4V930|G4V930_SCHMA Putative histone acetyltransferase type B catalytic subunit OS=Schistosoma mansoni GN=Smp_178700.2 PE	11	50.704	0.871049	0.0599576	0.0404007	1.0284	FALSE	20.1203763446215	20.2564558714086	20.734019503371	20.446566044579	20.3174995212113	20.2255839274696
G4V932	tr|G4V932|G4V932_SCHMA Putative lupus la ribonucleoprotein OS=Schistosoma mansoni GN=Smp_101820 PE=4 SV=1	20	110.21	0.00139344	2.85591	3.84667	14.3868	TRUE	20.3318999649676	20.1939347868506	20.1981503809221	16.6219770537853	14.9494470512774	17.6125430147574
G4V933	tr|G4V933|G4V933_SCHMA Hes-B related OS=Schistosoma mansoni GN=Smp_034530.1 PE=4 SV=1	2	15.537	2.24956e-06	5.6479	4.04264	16.4799	TRUE	17.2942414814024	17.5594267486542	17.5873161381023	13.2833653882194	13.3388459562242	13.6908642669623
G4V935	tr|G4V935|G4V935_SCHMA Putative alpha-actinin OS=Schistosoma mansoni GN=Smp_034550 PE=4 SV=1	2	104.32	0.155005	0.809655	-0.632524	1.55027	FALSE	13.9053200082564	15.1135053205394	14.7107061774474	15.1640197118395	14.8595878977437	15.6034944873125
G4V946;G4V945	tr|G4V946|G4V946_SCHMA Uncharacterized protein OS=Schistosoma mansoni GN=Smp_140900.1 PE=4 SV=1;tr|G4V945|G4V945_SCHMA Uncharacterized protein OS=Schistosoma mansoni GN=Smp_140900.2 PE=4 SV=1	12	20.967	0.138506	0.858532	0.478595	1.39339	FALSE	23.5676623841252	23.3903003730488	23.1545797948705	22.5927164795515	23.3525144029747	22.7315267151129
G4V949	tr|G4V949|G4V949_SCHMA Tubulin gamma chain OS=Schistosoma mansoni GN=Smp_034670 PE=3 SV=1	16	55.091	0.0147059	1.83251	0.650058	1.56923	FALSE	21.5490432981148	21.4201984852171	21.264655394869	20.6775704620612	20.8045450486103	20.8016073374705
G4V952;G4V953	tr|G4V952|G4V952_SCHMA Sco1-related OS=Schistosoma mansoni GN=Smp_034700.1 PE=4 SV=1;tr|G4V953|G4V953_SCHMA Sco1-related OS=Schistosoma mansoni GN=Smp_034700.3 PE=4 SV=1	6	26.812	0.936393	0.0285418	0.028751	1.02013	FALSE	19.9506682311294	20.1742027217264	19.9119947377073	19.8598240862892	20.6407554111808	19.4500331305652
G4V955	tr|G4V955|G4V955_SCHMA Transcription factor mrg-related OS=Schistosoma mansoni GN=Smp_140950 PE=4 SV=1	4	51.708	0.214062	0.669461	-0.743003	1.67366	FALSE	18.3946902852182	18.2844762269054	16.55644330915	18.6724221079863	18.4906833237637	18.3015122567107
G4V958	tr|G4V958|G4V958_SCHMA Putative phosphoglucomutase OS=Schistosoma mansoni GN=Smp_085150 PE=3 SV=1	15	63.799	0.336823	0.472598	-0.473689	1.38866	FALSE	18.9323418119832	20.131490197967	20.3754497336959	20.5924653591557	20.4334171244249	19.8344666503727
G4V960	tr|G4V960|G4V960_SCHMA Uncharacterized protein OS=Schistosoma mansoni GN=Smp_168360 PE=4 SV=1	1	85.846	0.0216557	1.66443	-1.8026	3.48849	FALSE	15.4728572060593	13.5125371649315	13.7208770455038	15.5874686963678	16.327259990558	16.1993488610628
G4V965	tr|G4V965|G4V965_SCHMA Putative poly(P)/ATP NAD kinase OS=Schistosoma mansoni GN=Smp_094870 PE=4 SV=1	1	31.824	0.021925	1.65906	-2.50558	5.67876	FALSE	13.2980158167032	16.3184107936305	13.7208770455038	16.9555740846126	16.8760039485	17.0224540877037
G4V966	tr|G4V966|G4V966_SCHMA Putative starch branching enzyme II OS=Schistosoma mansoni GN=Smp_094880 PE=4 SV=1	24	79.685	0.0189355	1.72272	-1.08189	2.1168	FALSE	19.5998132691664	20.6727698219235	19.8237379478937	21.2565226473873	20.8973378048276	21.1881218603641
G4V969;A9NI52	tr|G4V969|G4V969_SCHMA Putative 26s protease regulatory subunit OS=Schistosoma mansoni GN=Smp_012470 PE=3 SV=1;tr|A9NI52|A9NI52_SCHMA 26S proteasome subunit ATPase 2 (Fragment) OS=Schistosoma mansoni GN=RPT1 PE=2 SV=1	28	48.509	0.820085	0.0861409	0.0573656	1.04056	FALSE	22.786827382387	22.3009576666294	22.2685034551844	22.4755056410045	22.5360914946877	22.1725946514222
G4V985;G4V984;G4V986;G4V983	tr|G4V985|G4V985_SCHMA Putative DNAj (Hsp40) homolog, subfamily C, member OS=Schistosoma mansoni GN=Smp_049600.4 PE=4 SV=1;tr|G4V984|G4V984_SCHMA Putative DNAj (Hsp40) homolog, subfamily C, member OS=Schistosoma mansoni GN=Smp_049600.2 PE=4 SV=1;tr|G4V986|	15	55.517	0.045151	1.34533	-0.601789	1.5176	FALSE	20.3519066059914	20.0904675871	19.7886749837469	20.5942055621532	20.8870344441088	20.5551757590552
G4V9A3	tr|G4V9A3|G4V9A3_SCHMA Uncharacterized protein OS=Schistosoma mansoni GN=Smp_059810 PE=4 SV=1	3	25.01	0.0320176	1.49461	0.786294	1.72464	FALSE	19.6303590575553	19.6846365560615	19.3687282751079	18.9842583972955	18.2854944117352	19.0550885068963
G4V9A5;G4V9A6	tr|G4V9A5|G4V9A5_SCHMA Transketolase OS=Schistosoma mansoni GN=Smp_059790.2 PE=4 SV=1;tr|G4V9A6|G4V9A6_SCHMA Transketolase OS=Schistosoma mansoni GN=Smp_059790.1 PE=4 SV=1	27	67.153	0.0208358	1.68119	-0.81217	1.75585	FALSE	24.3876694967743	24.7215095253104	24.9660902255124	25.6046693375605	25.7111905033203	25.1959202724417
G4V9B1	tr|G4V9B1|G4V9B1_SCHMA Putative elongin B OS=Schistosoma mansoni GN=Smp_072380 PE=4 SV=1	8	13.655	0.011967	1.92202	-0.930126	1.90544	FALSE	21.2674964283573	21.2887391533022	21.6498512624917	22.4268139044686	22.6086162965466	21.9610359152025
G4V9B2	tr|G4V9B2|G4V9B2_SCHMA Putative tpr repeat nuclear phosphoprotein OS=Schistosoma mansoni GN=Smp_072370 PE=4 SV=1	4	125.12	0.0113753	1.94404	-1.69409	3.23573	FALSE	13.5358552771415	13.5125371649315	14.8409257053249	15.8010045851379	15.130720209514	16.0398635332741
G4V9B3	tr|G4V9B3|G4V9B3_SCHMA Uncharacterized protein OS=Schistosoma mansoni GN=Smp_072360 PE=4 SV=1	4	74.738	0.00265316	2.57624	-1.46095	2.7529	TRUE	15.818998771264	15.4433373270966	15.879811232837	17.1677785887861	16.7548547971885	17.6023705167331
G4V9B4	tr|G4V9B4|G4V9B4_SCHMA ATP synthase gamma-related OS=Schistosoma mansoni GN=Smp_072350 PE=4 SV=1	10	119.26	0.460267	0.33699	0.176043	1.12978	FALSE	17.9318526246236	18.0010411954731	17.633898585385	17.4937139929358	17.9184211838145	17.6265292911547
G4V9B5;A9NI60	tr|G4V9B5|G4V9B5_SCHMA Putative 26s protease regulatory subunit 6b OS=Schistosoma mansoni GN=Smp_072340 PE=3 SV=1;tr|A9NI60|A9NI60_SCHMA 26S proteasome subunit RPT3 (Fragment) OS=Schistosoma mansoni GN=RPT3 PE=2 SV=1	20	46.795	0.0498486	1.30235	0.618764	1.53556	FALSE	22.7904858327102	22.4543383018059	22.3910190782972	21.6784856274301	22.27325390946	21.8278120319622
G4V9B9;Q26582	tr|G4V9B9|G4V9B9_SCHMA Putative heat shock protein OS=Schistosoma mansoni GN=Smp_072330.2 PE=3 SV=1;tr|Q26582|Q26582_SCHMA Heat shock protein 86 (Fragment) OS=Schistosoma mansoni PE=2 SV=1	67	82.174	0.545625	0.263106	-0.122259	1.08844	FALSE	28.0917490519687	27.96751458549	28.0458564775064	28.0593389584456	28.3355532600166	28.0770058296663
G4V9C2	tr|G4V9C2|G4V9C2_SCHMA Putative rab15, 13, 10, 1, 35, 5, and OS=Schistosoma mansoni GN=Smp_210420 PE=4 SV=1	2	18.162	0.0297814	1.52605	3.15109	8.88328	FALSE	18.2550848507101	17.6804380111765	17.2658762688254	13.2833653882194	13.3388459562242	17.1259110308206
G4V9C3	tr|G4V9C3|G4V9C3_SCHMA Putative rab15, 13, 10, 1, 35, 5, and OS=Schistosoma mansoni GN=Smp_210430 PE=4 SV=1	8	24.441	0.0101304	1.99437	-1.01587	2.02212	FALSE	21.9743774104507	22.2609185184933	22.7635160567915	23.2344183100903	23.5398755827716	23.2721303249731
G4V9C8	tr|G4V9C8|G4V9C8_SCHMA Putative succinate semialdehyde dehydrogenase OS=Schistosoma mansoni GN=Smp_161350 PE=3 SV=1	4	59.616	0.507127	0.294883	-0.186931	1.13834	FALSE	17.5273232565741	16.711228203546	17.0301730348184	17.2152443644687	17.2683450688296	17.3459293877982
G4V9E1	tr|G4V9E1|G4V9E1_SCHMA Putative immunoglobulin domain superfamily (Sensory guidance protein) OS=Schistosoma mansoni GN=Smp_172070 PE=4 SV=1	2	91.73	0.0120098	1.92047	-2.68697	6.43958	FALSE	13.2980158167032	16.0882133288841	13.7208770455038	17.1095170175442	17.1082093341957	16.9502797297522
G4V9E4	tr|G4V9E4|G4V9E4_SCHMA Glutamine synthetase OS=Schistosoma mansoni GN=Smp_091460 PE=3 SV=1	8	40.904	0.0306408	1.5137	-1.28872	2.44311	FALSE	18.775739247341	19.7127667847221	18.8270107525332	20.9953129623628	19.6348855694777	20.5514767025054
G4V9G0	tr|G4V9G0|G4V9G0_SCHMA Aminomethyltransferase OS=Schistosoma mansoni GN=Smp_128980 PE=3 SV=1	3	40.946	0.0934936	1.02922	-0.585188	1.50023	FALSE	17.2727693657994	17.5600746817657	18.1202899743622	18.3532412448802	17.9703297561972	18.3851265467326
G4V9G1	tr|G4V9G1|G4V9G1_SCHMA Coronin OS=Schistosoma mansoni GN=Smp_012720 PE=3 SV=1	16	60.23	0.00142482	2.84624	1.42027	2.67636	TRUE	22.1618668137339	22.0506156115247	22.0274162536913	20.6863196265769	21.0108924272235	20.2818626445209
G4V9G2	tr|G4V9G2|G4V9G2_SCHMA Uncharacterized protein OS=Schistosoma mansoni GN=Smp_128990 PE=4 SV=1	1	80.09	0.0638156	1.19507	1.24313	2.36712	FALSE	19.7425121582563	18.865235987265	19.631149263336	18.4770082329761	17.0943739998288	18.9381196286242
G4V9G5	tr|G4V9G5|G4V9G5_SCHMA Putative 60s ribosomal protein L12 OS=Schistosoma mansoni GN=Smp_012750 PE=3 SV=1	6	17.73	0.00206382	2.68533	1.07367	2.10478	TRUE	25.2982835615071	25.3178569944314	24.9436176225771	24.1821416251095	24.1003367983226	24.0562703749862
G4V9G7	tr|G4V9G7|G4V9G7_SCHMA Putative sarm1 OS=Schistosoma mansoni GN=Smp_012780 PE=4 SV=1	3	136.48	0.0280219	1.5525	-1.40356	2.64553	FALSE	13.2980158167032	13.5125371649315	13.7208770455038	13.8709451946193	15.5517412188144	15.3194135390685
G4V9G9	tr|G4V9G9|G4V9G9_SCHMA Uncharacterized protein OS=Schistosoma mansoni GN=Smp_012800 PE=4 SV=1	3	10.231	0.185892	0.73074	0.344351	1.26958	FALSE	22.4707343313136	21.9473655745856	21.9507747164875	21.6976957306432	21.7649508636434	21.8731748878675
G4V9H0	tr|G4V9H0|G4V9H0_SCHMA Putative four and A half lim domains OS=Schistosoma mansoni GN=Smp_012810 PE=4 SV=1	7	13.63	0.00190515	2.72007	1.92145	3.78803	TRUE	21.9318933965729	22.5094241879234	21.5927354692423	20.3536048292936	19.5647397642771	20.3513682567914
G4V9I2	tr|G4V9I2|G4V9I2_SCHMA Putative fuse-binding protein-interacting repressor siahbp1 OS=Schistosoma mansoni GN=Smp_012900 PE=4 SV=1	12	56.244	0.610992	0.213965	0.187675	1.13893	FALSE	20.8297999656065	20.97286566876	21.0632178152774	20.8074720681502	21.3669720576205	20.1284133001908
G4V9I3	tr|G4V9I3|G4V9I3_SCHMA Uncharacterized protein OS=Schistosoma mansoni GN=Smp_129080 PE=4 SV=1	3	12.764	0.904192	0.0437392	-0.034204	1.02399	FALSE	21.2972355295365	21.898961123169	21.9313501602539	21.8524046070114	21.4552320623506	21.9225221364516
G4V9I5	tr|G4V9I5|G4V9I5_SCHMA Inosine-5-monophosphate dehydrogenase OS=Schistosoma mansoni GN=Smp_012930 PE=3 SV=1	24	55.062	0.885119	0.0529984	0.0307977	1.02158	FALSE	22.0141063768553	22.3618612650172	22.1759788314906	21.9955662133756	22.2761735398282	22.1878137699363
G4V9J6	tr|G4V9J6|G4V9J6_SCHMA Uncharacterized protein OS=Schistosoma mansoni GN=Smp_161030 PE=4 SV=1	9	30.57	0.0105431	1.97703	-3.66161	12.6547	FALSE	15.0518441313532	18.5175271493726	18.533156301991	21.0170314704971	20.8382206326908	21.2320927274956
G4V9J7	tr|G4V9J7|G4V9J7_SCHMA Uncharacterized protein OS=Schistosoma mansoni GN=Smp_071520 PE=4 SV=1	7	9.5759	5.9794e-08	7.22334	-8.31124	317.639	TRUE	13.2980158167032	13.5125371649315	13.7208770455038	21.6176267736976	21.7289825941925	22.1185548117093
G4V9L3	tr|G4V9L3|G4V9L3_SCHMA Putative shc transforming protein OS=Schistosoma mansoni GN=Smp_172110 PE=3 SV=1	15	40.227	0.0058368	2.23383	-0.899859	1.86588	FALSE	24.1063866119813	24.0293920103483	24.056787534264	25.0095022389702	25.1888759491247	24.6937645871825
G4V9L6	tr|G4V9L6|G4V9L6_SCHMA Uncharacterized protein OS=Schistosoma mansoni GN=Smp_172140 PE=4 SV=1	2	58.009	1.2411e-05	4.90619	-2.92387	7.58878	TRUE	13.2980158167032	13.5125371649315	13.7208770455038	16.470930167533	16.5589043262437	16.2731994528534
G4V9L7	tr|G4V9L7|G4V9L7_SCHMA Putative atp-dependent RNA helicase OS=Schistosoma mansoni GN=Smp_172150 PE=4 SV=1	16	171.13	4.95247e-06	5.30518	-5.17371	36.0946	TRUE	13.0114851165077	12.2863343233838	13.2255170474912	18.045127983781	17.7359913188823	18.2633459381266
G4V9L8	tr|G4V9L8|G4V9L8_SCHMA Senescence downregulated leo1-like OS=Schistosoma mansoni GN=Smp_172160 PE=4 SV=1	6	53.497	0.028954	1.53829	0.639208	1.55747	FALSE	19.1908108202619	18.9658334387284	18.6883330277353	18.3641718789255	18.4118680715906	18.1513137023009
G4V9M0	tr|G4V9M0|G4V9M0_SCHMA Phosphate transporter OS=Schistosoma mansoni GN=Smp_094660 PE=3 SV=1	1	54.113	0.910919	0.0405202	0.0373	1.02619	FALSE	15.3457806847373	15.6908359533844	16.1426785554751	15.861976951257	15.2427151841838	15.9627031960119
G4V9M3	tr|G4V9M3|G4V9M3_SCHMA Putative heat shock protein 70 (Hsp70) OS=Schistosoma mansoni GN=Smp_094680 PE=3 SV=1	1	22.197	0.618998	0.20831	-0.178614	1.1318	FALSE	19.7481497319839	18.825787720416	19.1616986825605	19.0522938801581	19.8333112446636	19.3858716516529
G4V9N5	tr|G4V9N5|G4V9N5_SCHMA S-adenosylmethionine-dependent methyltransferase related OS=Schistosoma mansoni GN=Smp_154780 PE=4 SV=1	6	73.858	0.0164882	1.78283	-2.99692	7.98295	FALSE	13.2980158167032	13.5125371649315	16.4024814143098	17.7718158468585	16.724360226097	17.7076221026129
G4V9N7	tr|G4V9N7|G4V9N7_SCHMA Egf-like domain protein OS=Schistosoma mansoni GN=Smp_154760 PE=4 SV=1	11	198.16	0.00214649	2.66827	-1.30233	2.46627	TRUE	17.7923171989046	17.8357810989876	18.1194540580625	19.5562519818643	19.1874934295846	18.9108019533799
G4V9N9	tr|G4V9N9|G4V9N9_SCHMA Putative nucleotide binding protein 2 (Nbp 2) OS=Schistosoma mansoni GN=Smp_210380 PE=4 SV=1	3	17.136	0.722605	0.141099	0.282561	1.21635	FALSE	18.0917034324319	18.6061864874537	18.4621487990226	19.0286506604972	18.9249902683917	16.3587148497003
G4V9P0	tr|G4V9P0|G4V9P0_SCHMA Putative nucleotide binding protein 2 (Nbp 2) OS=Schistosoma mansoni GN=Smp_210390 PE=4 SV=1	2	30.494	0.192028	0.716636	1.23168	2.3484	FALSE	18.6523998293939	18.60458221403	17.7036016100984	18.1015579219786	15.2307785644161	17.9332071389833
G4V9P7	tr|G4V9P7|G4V9P7_SCHMA Putative fms interacting protein OS=Schistosoma mansoni GN=Smp_067250.1 PE=4 SV=1	7	84.782	0.947756	0.0233036	0.0227872	1.01592	FALSE	18.0374100471745	17.3982333334548	17.8069022116919	17.1519425169963	18.0187459237043	18.0034956374762
G4V9P8	tr|G4V9P8|G4V9P8_SCHMA DNA polymerase alpha subunit B OS=Schistosoma mansoni GN=Smp_067260 PE=3 SV=1	12	68.731	0.403485	0.394173	0.3011	1.23208	FALSE	20.0760347732748	20.1204284890824	19.6257480631588	19.8733373363333	20.0107507851793	19.0348220608002
G4V9Q0	tr|G4V9Q0|G4V9Q0_SCHMA Putative dynamin OS=Schistosoma mansoni GN=Smp_067280 PE=3 SV=1	20	77.096	0.174542	0.758099	0.317692	1.24634	FALSE	20.1775810383447	20.0403975901699	20.0067880948479	19.97104910351	19.5471309063368	19.7535103190806
G4V9R0;G4V9R1	tr|G4V9R0|G4V9R0_SCHMA Putative dead box ATP-dependent RNA helicase OS=Schistosoma mansoni GN=Smp_093690.1 PE=3 SV=1;tr|G4V9R1|G4V9R1_SCHMA Putative dead box ATP-dependent RNA helicase OS=Schistosoma mansoni GN=Smp_093690.2 PE=3 SV=1	20	83.291	0.336872	0.472536	0.802188	1.74374	FALSE	18.38030067576	19.0205528502328	19.2138693689144	18.1627717899108	16.5345829575818	19.5108055251785
G4V9R2	tr|G4V9R2|G4V9R2_SCHMA Putative membrane associated progesterone receptor OS=Schistosoma mansoni GN=Smp_093700 PE=3 SV=1	3	21.428	0.120401	0.919368	0.496036	1.41033	FALSE	19.5361739265928	19.4536991999094	18.9413453035676	19.1415990035116	18.7393461863032	18.5621652664282
G4V9R9	tr|G4V9R9|G4V9R9_SCHMA Putative glutamyl-tRNA synthetase 1, 2, 3 (Glutamate--tRNA ligase 1, 2, 3) OS=Schistosoma mansoni GN=Smp_009520 PE=3 SV=1	4	66.788	0.349456	0.456608	0.853054	1.80632	FALSE	16.9003778708028	16.9815039011164	17.2071665902026	17.113554831531	14.2156782262896	17.2006524619836
G4V9S3	tr|G4V9S3|G4V9S3_SCHMA Putative membrane traffic protein OS=Schistosoma mansoni GN=Smp_140490 PE=4 SV=1	5	56.112	0.336424	0.473113	-0.27132	1.20691	FALSE	19.4911460601478	19.2864570093395	19.3059353987414	19.4099907688025	20.0767828920758	19.4107255056888
G4V9S4	tr|G4V9S4|G4V9S4_SCHMA Putative paramyosin (Allergen Blo t 11) OS=Schistosoma mansoni GN=Smp_140500 PE=4 SV=1	3	97.056	0.0203017	1.69247	-1.09122	2.13054	FALSE	13.2980158167032	13.5125371649315	13.7208770455038	14.8461021758793	15.0212230405932	13.9377639861287
G4V9S7;G4V9S6;Q6UEH7	tr|G4V9S7|G4V9S7_SCHMA Putative smad4 OS=Schistosoma mansoni GN=Smp_033950.1 PE=4 SV=1;tr|G4V9S6|G4V9S6_SCHMA Putative smad4 OS=Schistosoma mansoni GN=Smp_033950.3 PE=4 SV=1;tr|Q6UEH7|Q6UEH7_SCHMA Mothers against decapentaplegic homolog OS=Schistosoma mans	1	47.891	0.231673	0.635124	-0.330354	1.25732	FALSE	17.0541084766059	16.9996619965203	16.8719831435467	17.3738362751034	17.6222952066773	16.9206841444799
G4V9T2	tr|G4V9T2|G4V9T2_SCHMA Putative flotillin-2 OS=Schistosoma mansoni GN=Smp_033970 PE=4 SV=1	7	50.123	0.026942	1.56957	-2.34268	5.07244	FALSE	14.4713768515708	17.004324743476	17.4137707917692	18.8234465822538	18.7525865413682	18.3414748463092
G4V9T3	tr|G4V9T3|G4V9T3_SCHMA Putative replication factor C / DNA polymerase III gamma-tau subunit OS=Schistosoma mansoni GN=Smp_140530 PE=4 SV=1	8	52.335	0.029011	1.53744	0.960054	1.94538	FALSE	18.6509144544522	19.3133084449653	19.2716179422618	18.205784264127	18.5286121306843	17.62128206154
G4V9U0	tr|G4V9U0|G4V9U0_SCHMA Putative 39s ribosomal protein L35, mitochondrial OS=Schistosoma mansoni GN=Smp_140550 PE=4 SV=1	4	19.833	0.000828664	3.08162	1.96559	3.90574	TRUE	18.1917986059762	18.3100380683305	18.6279426206677	16.0823360542517	16.1838898394843	16.9667696138484
G4V9U9	tr|G4V9U9|G4V9U9_SCHMA Putative major vault protein OS=Schistosoma mansoni GN=Smp_006740 PE=4 SV=1	35	97.253	0.00380892	2.4192	-1.54854	2.92521	TRUE	19.8088400267674	20.4681164404441	20.9606815195398	21.8427807122257	22.0756999908872	21.964780994706
G4V9V3;G4V9V4	tr|G4V9V3|G4V9V3_SCHMA Putative synaptobrevin OS=Schistosoma mansoni GN=Smp_006720.1 PE=4 SV=1;tr|G4V9V4|G4V9V4_SCHMA Putative synaptobrevin OS=Schistosoma mansoni GN=Smp_006720.2 PE=4 SV=1	3	9.2153	0.160626	0.794184	0.517138	1.43111	FALSE	19.5724302426428	19.4019325535351	19.0547666613703	18.3318345578674	19.328201497137	18.8176792743435
G4V9V5	tr|G4V9V5|G4V9V5_SCHMA Endonuclease III homolog OS=Schistosoma mansoni GN=NTH1 PE=3 SV=1	6	29.892	0.800193	0.0968054	0.176882	1.13044	FALSE	19.132401173945	16.9463609170522	17.7553486733306	17.0556595054188	17.6798710894474	18.5679346372439
G4V9W3	tr|G4V9W3|G4V9W3_SCHMA Uncharacterized protein OS=Schistosoma mansoni GN=Smp_125800 PE=4 SV=1	13	49.342	0.282188	0.549462	-0.245013	1.1851	FALSE	19.6629022440209	19.6371184526302	19.3639584038157	19.7732581991653	19.979029334375	19.6467317582747
G4V9W6	tr|G4V9W6|G4V9W6_SCHMA Actin-related protein 5, arp5 OS=Schistosoma mansoni GN=Smp_125790 PE=3 SV=1	3	103.96	0.00676949	2.16944	1.48094	2.79131	TRUE	16.1997172751139	17.2693679588225	16.4732442536579	14.8325207096791	15.1379182011164	15.529070573767
G4V9X0;G4V9W9	tr|G4V9X0|G4V9X0_SCHMA Putative scythe/bat3 OS=Schistosoma mansoni GN=Smp_125770.2 PE=4 SV=1;tr|G4V9W9|G4V9W9_SCHMA Putative scythe/bat3 OS=Schistosoma mansoni GN=Smp_125770.1 PE=4 SV=1	17	141.96	0.995621	0.00190594	-0.00262043	1.00182	FALSE	18.5851890127883	19.1319744863371	19.1432797113756	18.9779149815573	18.1241671728911	19.7662223447578
G4V9X4	tr|G4V9X4|G4V9X4_SCHMA Uncharacterized protein OS=Schistosoma mansoni GN=Smp_006560 PE=4 SV=1	7	20.255	0.0366566	1.43585	0.693335	1.61702	FALSE	22.1217710131136	21.9581251010457	21.9466116139261	21.506153127611	21.5636780719428	20.8766706619247
G4V9X6	tr|G4V9X6|G4V9X6_SCHMA Putative glutaredoxin, grx OS=Schistosoma mansoni GN=Smp_006550.1 PE=4 SV=1	13	23.978	0.466157	0.331468	-0.174537	1.1286	FALSE	21.8539928094041	22.1391892595368	22.1247106606031	22.3481215858452	22.3662249271654	21.9271561173312
G4V9Y0	tr|G4V9Y0|G4V9Y0_SCHMA Putative pyruvate dehydrogenase OS=Schistosoma mansoni GN=Smp_068170.1 PE=4 SV=1	5	44.006	0.00495336	2.3051	-1.6476	3.13312	TRUE	16.3628899130606	16.4044522371495	17.5030528158459	18.3999389111523	18.1683184379449	18.6449372868287
G4V9Y3	tr|G4V9Y3|G4V9Y3_SCHMA Putative transmembrane transport protein OS=Schistosoma mansoni GN=Smp_072950 PE=3 SV=1	9	24.537	0.0320311	1.49443	0.66709	1.58787	FALSE	22.9233828014073	22.6342540685071	22.4177449714031	21.7394838864136	22.1689024890312	22.0657241593598
G4V9Z1	tr|G4V9Z1|G4V9Z1_SCHMA Putative short-chain dehydrogenase/reductase OS=Schistosoma mansoni GN=Smp_078600 PE=4 SV=1	3	37.064	0.0321794	1.49242	-1.34095	2.53318	FALSE	16.251861503914	15.5531483470012	16.0742436492634	17.548926544153	16.351657976521	18.0015149655551
G4V9Z2	tr|G4V9Z2|G4V9Z2_SCHMA Putative rna binding motif protein 25 OS=Schistosoma mansoni GN=Smp_078610 PE=4 SV=1	8	79.363	0.182967	0.737627	0.673448	1.59488	FALSE	19.009322849689	18.7306393316438	19.0115093687463	17.2969485913746	18.8907952375675	18.5433823019366
G4V9Z3	tr|G4V9Z3|G4V9Z3_SCHMA Putative snrnp sm protein OS=Schistosoma mansoni GN=Smp_078640 PE=4 SV=1	3	11.986	0.854689	0.0681919	0.0485795	1.03425	FALSE	21.7592902895891	21.234186954334	21.1421088081995	21.3025270847792	21.1488980243784	21.5384225815452
G4VA00	tr|G4VA00|G4VA00_SCHMA Irx-related OS=Schistosoma mansoni GN=Smp_063520 PE=4 SV=1	4	60.482	9.16149e-06	5.03803	4.68377	25.7013	TRUE	18.4406899477132	18.1998830033111	18.7540235041317	14.3135807732275	13.3388459562242	13.6908642669623
G4VA01;G4VA02	tr|G4VA01|G4VA01_SCHMA Ferritin OS=Schistosoma mansoni GN=Smp_063530.1 PE=3 SV=1;tr|G4VA02|G4VA02_SCHMA Ferritin OS=Schistosoma mansoni GN=Smp_063530.2 PE=3 SV=1	2	22.286	0.0116498	1.93368	-0.847147	1.79894	FALSE	17.2361246238906	16.9562394213876	17.0361819967238	18.2372052989251	17.8718924610808	17.6608893542515
G4VA05	tr|G4VA05|G4VA05_SCHMA Uncharacterized protein OS=Schistosoma mansoni GN=Smp_063560 PE=4 SV=1	10	43.72	0.0512264	1.29051	-1.87477	3.66743	FALSE	17.1031903816706	17.8608310753662	20.0459950161126	20.2556770870297	19.9346537671431	20.4439915702182
G4VA11	tr|G4VA11|G4VA11_SCHMA Uncharacterized protein OS=Schistosoma mansoni GN=Smp_063630 PE=4 SV=1	4	24.635	2.01148e-06	5.69648	-5.90796	60.0445	TRUE	13.2980158167032	13.5125371649315	13.7208770455038	19.6444256217517	19.7605941199696	18.8502928389922
G4VA12	tr|G4VA12|G4VA12_SCHMA Putative g-protein, beta subunit OS=Schistosoma mansoni GN=Smp_063640 PE=4 SV=1	5	37.512	0.00174671	2.75778	-1.33636	2.52513	TRUE	19.65435324355	20.2549004049066	20.1256796352196	21.2657072568301	21.5409549302647	21.2373422231956
G4VA14;G4VA13	tr|G4VA14|G4VA14_SCHMA Putative transcription initiation factor IIB (TFIIB) OS=Schistosoma mansoni GN=Smp_063650.3 PE=4 SV=1;tr|G4VA13|G4VA13_SCHMA Putative transcription initiation factor iib OS=Schistosoma mansoni GN=Smp_063650.4 PE=4 SV=1	5	31.586	0.0479625	1.3191	2.73409	6.65338	FALSE	18.8067071767436	18.6632190537043	18.0701229898749	13.2833653882194	16.5617534528368	17.4926681558308
G4VA17	tr|G4VA17|G4VA17_SCHMA Uncharacterized protein OS=Schistosoma mansoni GN=Smp_063670 PE=4 SV=1	4	36.581	0.0221308	1.655	1.17485	2.2577	FALSE	17.5089654843562	17.0555635993844	17.0479901880078	16.6277396691851	16.1214725350675	15.3387481424362
G4VA20	tr|G4VA20|G4VA20_SCHMA Uncharacterized protein OS=Schistosoma mansoni GN=Smp_156460 PE=4 SV=1	2	32.662	0.0241026	1.61794	2.5261	5.76013	FALSE	18.7706418621656	18.3634345281451	18.6000949068643	14.109831475365	17.0124212758508	17.0336156258525
G4VA23;B8YCP4	tr|G4VA23|G4VA23_SCHMA Putative 22.6kDa tegument-associated antigen OS=Schistosoma mansoni GN=Smp_086470 PE=4 SV=1;tr|B8YCP4|B8YCP4_SCHMA Tegument-associated antigen OS=Schistosoma mansoni PE=2 SV=1	5	21.624	0.380841	0.419256	0.562334	1.47666	FALSE	19.2583075149649	19.778085318482	18.5559110826173	19.0995424188225	19.327155340778	17.4786049694475
G4VA33	tr|G4VA33|G4VA33_SCHMA Putative eukaryotic translation initiation factor 3 subunit (Eif-3) OS=Schistosoma mansoni GN=Smp_161480 PE=4 SV=1	19	118.97	0.0994269	1.0025	0.769601	1.7048	FALSE	18.2240551212999	19.0278575187638	19.3278396662273	17.8285958964467	17.8207783725819	18.6215740755155
G4VA35	tr|G4VA35|G4VA35_SCHMA Putative eukaryotic translation initiation factor 3 subunit (Eif-3) OS=Schistosoma mansoni GN=Smp_188700 PE=4 SV=1	4	28.845	0.0638159	1.19507	3.2211	9.325	FALSE	18.368841369767	19.0672839005778	19.4931087851452	15.0272283901714	13.3388459562242	18.8998487713354
G4VA38	tr|G4VA38|G4VA38_SCHMA Uncharacterized protein OS=Schistosoma mansoni GN=Smp_072560 PE=4 SV=1	5	77.414	0.00985457	2.00636	-2.24347	4.73533	TRUE	13.2980158167032	13.5125371649315	13.9930785841196	14.5538766678266	16.3534284070462	16.6267232669588
G4VA50	tr|G4VA50|G4VA50_SCHMA Putative tetratricopeptide protein OS=Schistosoma mansoni GN=Smp_072970 PE=4 SV=1	6	27.507	0.132098	0.879105	0.401779	1.32114	FALSE	20.0825687710545	20.155388552159	19.8412182403626	19.8696945832331	19.6635844614095	19.3405586336269
G4VA51	tr|G4VA51|G4VA51_SCHMA Putative eukaryotic elongation factor 2 kinase (Eef-2 kinase) OS=Schistosoma mansoni GN=Smp_072980 PE=4 SV=1	10	93.477	0.000617173	3.20959	4.01959	16.2187	TRUE	18.4037731424257	18.5000379145762	18.6256801369984	15.7064849578289	13.3388459562242	14.4253958344117
G4VA67;G4VA66	tr|G4VA67|G4VA67_SCHMA Uncharacterized protein OS=Schistosoma mansoni GN=Smp_073080.1 PE=4 SV=1;tr|G4VA66|G4VA66_SCHMA Putative rrna processing protein (Rrp20) OS=Schistosoma mansoni GN=Smp_073080.2 PE=4 SV=1	3	16.79	0.0109554	1.96037	3.31999	9.98655	FALSE	18.7120672878744	18.0226175584815	19.1859483109321	16.0089433607118	13.3388459562242	16.6128857616335
G4VA72	tr|G4VA72|G4VA72_SCHMA Putative vacuolar protein sorting 26, vps26 OS=Schistosoma mansoni GN=Smp_210770 PE=4 SV=1	9	56.402	0.0496601	1.30399	-1.46889	2.76809	FALSE	15.3516932774749	17.4989119525735	15.5924968439302	17.5028645511058	17.7111011527242	17.6358108352926
G4VA73	tr|G4VA73|G4VA73_SCHMA Putative vacuolar protein sorting 26, vps26 OS=Schistosoma mansoni GN=Smp_210780 PE=4 SV=1	17	92.712	0.00272752	2.56423	-1.1819	2.26875	TRUE	18.9426575539435	19.3049145592305	18.9015409877103	20.3610932235893	20.3912767756922	19.9424311634058
G4VA77;G4VA76	tr|G4VA77|G4VA77_SCHMA Uncharacterized protein OS=Schistosoma mansoni GN=Smp_161790.1 PE=4 SV=1;tr|G4VA76|G4VA76_SCHMA Uncharacterized protein OS=Schistosoma mansoni GN=Smp_161790.2 PE=4 SV=1	8	47.681	0.633206	0.198455	0.284148	1.21769	FALSE	18.4875999917439	19.2883699081657	18.0726499511826	17.9702040299919	17.6359512518753	19.3900200017607
G4VA81	tr|G4VA81|G4VA81_SCHMA Putative adp-ribosylation factor interacting protein OS=Schistosoma mansoni GN=Smp_073210 PE=4 SV=1	8	38.741	0.0287011	1.5421	0.774616	1.71074	FALSE	19.7525193316117	19.9991842741381	19.6758345425524	18.8493700523894	18.7720381477576	19.4822810377714
G4VA89	tr|G4VA89|G4VA89_SCHMA Uncharacterized protein OS=Schistosoma mansoni GN=Smp_073290 PE=4 SV=1	3	72.384	0.656776	0.182583	-0.65917	1.57917	FALSE	17.8373290798337	13.5125371649315	16.8608996444177	17.3195227635224	18.1794003820527	14.689351719766
G4VA90	tr|G4VA90|G4VA90_SCHMA Uncharacterized protein OS=Schistosoma mansoni GN=Smp_073300 PE=4 SV=1	9	53.16	0.973782	0.0115381	0.00987123	1.00687	FALSE	19.332764871559	18.6129327778083	18.7825341649371	18.8400812463124	18.6381169374604	19.2204199272122
G4VA93	tr|G4VA93|G4VA93_SCHMA Uncharacterized protein OS=Schistosoma mansoni GN=Smp_196960 PE=4 SV=1	5	35.579	0.510952	0.29162	0.744798	1.67574	FALSE	15.1859437758318	15.6640832257787	17.1642886039515	15.2541030254013	13.3388459562242	17.1869713202534
G4VA94	tr|G4VA94|G4VA94_SCHMA Putative intermembrane space import and assembly protein 40, mitochondrial (Mitochondrial import inner membrane translocase TIM40) OS=Schistosoma mansoni GN=Smp_062830.1 PE=4 SV=1	4	15.055	0.0774663	1.11089	0.921836	1.89452	FALSE	20.7191011994734	20.3526711866679	20.3536057181759	19.8012271259576	18.6678126299119	20.1908302228712
G4VA96	tr|G4VA96|G4VA96_SCHMA GrpE protein homolog OS=Schistosoma mansoni GN=Smp_062790 PE=3 SV=1	6	25.042	0.000127464	3.89461	1.64139	3.11966	TRUE	21.4632781628724	21.3052044478322	21.337175735025	19.6358728370962	19.7593974989946	19.7862229069262
G4VA98;G4VA97	tr|G4VA98|G4VA98_SCHMA Putative oxysterol-binding protein OS=Schistosoma mansoni GN=Smp_156000.1 PE=4 SV=1;tr|G4VA97|G4VA97_SCHMA Putative oxysterol binding protein 9 OS=Schistosoma mansoni GN=Smp_156000.2 PE=4 SV=1	5	52.241	0.476737	0.321721	0.61279	1.52921	FALSE	17.4105772136137	17.2865222635761	16.8861158538438	17.5810890849667	14.7196259439915	17.4441291597506
G4VAA5;G4VAA6	tr|G4VAA5|G4VAA5_SCHMA Putative cysteinyl-tRNA synthetase OS=Schistosoma mansoni GN=Smp_170800.1 PE=3 SV=1;tr|G4VAA6|G4VAA6_SCHMA Putative cysteinyl-tRNA synthetase OS=Schistosoma mansoni GN=Smp_170800.2 PE=3 SV=1	30	92.476	0.00476815	2.32165	0.780178	1.71734	FALSE	21.4577668321818	21.4778167930816	21.392583444562	20.6635497451256	20.7069456908753	20.6171388344851
G4VAA7	tr|G4VAA7|G4VAA7_SCHMA Ubiquitin-specific peptidase 7 (C19 family) OS=Schistosoma mansoni GN=Smp_089180 PE=3 SV=1	44	156.44	0.9825	0.00766753	0.00478886	1.00332	FALSE	21.0927979033714	21.3895411264524	21.4363564583857	21.1286614322423	21.3335002104157	21.4421672690418
G4VAB0	tr|G4VAB0|G4VAB0_SCHMA Putative multidrug resistance protein 1, 2, 3 (P glycoprotein 1, 2, 3) OS=Schistosoma mansoni GN=Smp_089200 PE=4 SV=1	1	117.24	0.982062	0.00786112	0.00670174	1.00466	FALSE	13.2980158167032	13.5125371649315	13.7208770455038	13.2791108490923	13.9916725580906	13.2405413985213
G4VAB2	tr|G4VAB2|G4VAB2_SCHMA Uncharacterized protein OS=Schistosoma mansoni GN=Smp_089220 PE=4 SV=1	5	26.702	0.890254	0.0504861	0.0907071	1.06489	FALSE	19.7915085385049	19.5148931056218	19.0239327870153	20.2766688297536	19.7811517075369	18.0003926241032
G4VAD0	tr|G4VAD0|G4VAD0_SCHMA Putative zinc finger protein OS=Schistosoma mansoni GN=Smp_099900 PE=4 SV=1	9	45.307	0.146661	0.833687	0.512679	1.4267	FALSE	20.4846289971245	19.8864584261491	19.8151858033918	19.5449453204029	19.1767262477543	19.9265653734312
G4VAD1	tr|G4VAD1|G4VAD1_SCHMA Receptor expression-enhancing protein OS=Schistosoma mansoni GN=Smp_099890 PE=3 SV=1	8	21.422	0.312179	0.505596	-0.248638	1.18808	FALSE	22.2107836566417	22.4578917694337	22.0838432132495	22.4258558086193	22.315350713298	22.7572249635531
G4VAD2	tr|G4VAD2|G4VAD2_SCHMA Elongation factor 1-alpha OS=Schistosoma mansoni GN=Smp_099870 PE=3 SV=1	39	50.98	0.686399	0.163423	0.106081	1.0763	FALSE	26.9946653414824	27.276207488189	27.6357899254888	27.1140138610434	27.4174311810819	27.056973408498
G4VAE7	tr|G4VAE7|G4VAE7_SCHMA Putative ef-hand domain (C-terminal) containing protein OS=Schistosoma mansoni GN=Smp_159160 PE=4 SV=1	7	70.606	8.96751e-07	6.04733	-4.50813	22.7553	TRUE	13.2980158167032	13.5125371649315	13.7208770455038	18.0794794885718	18.0732062291103	17.9031354592422
G4VAF7;G4VAF6;G4VAF8	tr|G4VAF7|G4VAF7_SCHMA Putative tumor protein d52 OS=Schistosoma mansoni GN=Smp_065470.2 PE=4 SV=1;tr|G4VAF6|G4VAF6_SCHMA Putative tumor protein d52 OS=Schistosoma mansoni GN=Smp_065470.3 PE=4 SV=1;tr|G4VAF8|G4VAF8_SCHMA Putative tumor protein d52 OS=Schis	7	18.337	0.682671	0.165788	-0.120826	1.08736	FALSE	22.7725270347568	22.6540725524195	22.3023985128295	22.8577081257588	22.9818501362459	22.2519164206465
G4VAG2	tr|G4VAG2|G4VAG2_SCHMA Calpain (C02 family) OS=Schistosoma mansoni GN=Smp_157500 PE=3 SV=1	10	172.93	0.0034018	2.46829	-2.63009	6.19065	TRUE	13.6323375054706	15.6427911361723	15.1494728320929	17.7234151887598	17.143262212633	17.4481958786183
G4VAG6;G4VAG8;G4VAG7;G4VAG9;G4VAH0	tr|G4VAG6|G4VAG6_SCHMA Putative heterogeneous nuclear ribonucleoprotein k OS=Schistosoma mansoni GN=Smp_065580.5 PE=4 SV=1;tr|G4VAG8|G4VAG8_SCHMA Putative heterogeneous nuclear ribonucleoprotein k OS=Schistosoma mansoni GN=Smp_065580.1 PE=4 SV=1;tr|G4VAG7|	6	33.92	0.325792	0.487059	0.408415	1.32723	FALSE	21.0909733235899	20.638669930261	20.0439462501376	20.3778984757135	20.5244312932136	19.6460142375168
G4VAI0;G4VAH9	tr|G4VAI0|G4VAI0_SCHMA Pyruvate kinase OS=Schistosoma mansoni GN=Smp_065610.1 PE=3 SV=1;tr|G4VAH9|G4VAH9_SCHMA Pyruvate kinase OS=Schistosoma mansoni GN=Smp_065610.2 PE=3 SV=1	34	54.784	0.124308	0.905499	-0.468695	1.38386	FALSE	23.1708555969612	23.7516610933078	23.8616362004905	23.9375791150019	24.0020485913785	24.2506091819715
G4VAI6	tr|G4VAI6|G4VAI6_SCHMA Uncharacterized protein OS=Schistosoma mansoni GN=Smp_157590 PE=4 SV=1	8	119.8	0.00208457	2.68098	-2.96846	7.82699	TRUE	13.2980158167032	13.5125371649315	13.7208770455038	17.0227980952194	15.2230916644626	17.1909122151443
G4VAJ8	tr|G4VAJ8|G4VAJ8_SCHMA Protein kinase OS=Schistosoma mansoni GN=Smp_154440 PE=3 SV=1	24	364.57	0.000479324	3.31937	-1.30088	2.46379	TRUE	17.0642170811979	16.9925328329376	17.0151785008455	18.1813069736307	18.3654774095923	18.427774502085
G4VAJ9	tr|G4VAJ9|G4VAJ9_SCHMA 40S ribosomal protein S12 OS=Schistosoma mansoni GN=Smp_060090.1 PE=3 SV=1	8	14.591	0.0120194	1.92012	1.01761	2.02456	FALSE	24.4449495866932	24.6070793992964	23.9144898117409	22.9720275335515	23.44242428605	23.4992481415602
G4VAK1	tr|G4VAK1|G4VAK1_SCHMA Putative septin OS=Schistosoma mansoni GN=Smp_060070 PE=2 SV=1	4	56.892	0.962945	0.0163985	-0.0172897	1.01206	FALSE	16.8956696152465	17.2747286933732	17.5341699220617	17.9018502829732	16.8950374667784	16.9595495948481
G4VAK2	tr|G4VAK2|G4VAK2_SCHMA Putative clathrin heavy chain OS=Schistosoma mansoni GN=Smp_191010 PE=4 SV=1	12	35.318	0.0772481	1.11211	-0.910884	1.8802	FALSE	20.2592014234066	21.0415579866191	21.8369119908633	21.8070969786901	22.1371047672158	21.9261221567095
G4VAK4;G4VAK3	tr|G4VAK4|G4VAK4_SCHMA Clathrin heavy chain OS=Schistosoma mansoni GN=Smp_154420.1 PE=3 SV=1;tr|G4VAK3|G4VAK3_SCHMA Putative clathrin heavy chain OS=Schistosoma mansoni GN=Smp_154420.2 PE=4 SV=1	48	153.11	0.133075	0.875904	-0.654526	1.5741	FALSE	20.0059959028492	20.63986224028	21.3469600258372	21.1985690622518	21.5101231269095	21.2477054333183
G4VAK6	tr|G4VAK6|G4VAK6_SCHMA Putative ubx domain containing protein OS=Schistosoma mansoni GN=Smp_060010 PE=4 SV=1	11	43.208	0.50515	0.296579	0.280943	1.21499	FALSE	21.3848054189474	20.9131889304195	20.9836540052014	21.088909835381	21.3277126271733	20.0221960587728
G4VAL0;G4VAL1;G4VAK9	tr|G4VAL0|G4VAL0_SCHMA Uncharacterized protein OS=Schistosoma mansoni GN=Smp_120920.2 PE=4 SV=1;tr|G4VAL1|G4VAL1_SCHMA Uncharacterized protein OS=Schistosoma mansoni GN=Smp_120920.1 PE=4 SV=1;tr|G4VAK9|G4VAK9_SCHMA Uncharacterized protein OS=Schistosoma ma	2	69.469	0.000750714	3.12453	-1.99153	3.97657	TRUE	13.2980158167032	13.5125371649315	13.7208770455038	15.3036925603928	16.0549359356708	15.1473779140219
G4VAL2	tr|G4VAL2|G4VAL2_SCHMA Putative leucyl-tRNA synthetase OS=Schistosoma mansoni GN=Smp_194160 PE=3 SV=1	40	134.65	0.0815634	1.0885	0.467895	1.38309	FALSE	20.6742307987393	21.1360843870127	21.0713038976923	20.5146600268552	20.3352545911857	20.6280198101719
G4VAL3	tr|G4VAL3|G4VAL3_SCHMA Putative sodium/potassium-transporting ATPase subunit beta (Sodium/potassium-dependent ATPase beta subunit) OS=Schistosoma mansoni GN=Smp_033550 PE=4 SV=1	4	23.548	0.0279187	1.5541	-1.13548	2.19691	FALSE	18.74046512206	20.0954424025153	19.3367193544526	20.6687043920292	20.2319893176378	20.6783639435023
G4VAL5	tr|G4VAL5|G4VAL5_SCHMA Putative ubiquitin--protein ligase edd OS=Schistosoma mansoni GN=Smp_150360 PE=4 SV=1	23	357.47	0.140097	0.853571	0.902067	1.86874	FALSE	16.448326175862	17.0124484636613	17.2175396616872	15.7838964070733	15.1533575136625	17.0348586036906
G4VAM3	tr|G4VAM3|G4VAM3_SCHMA Putative tubulin-specific chaperone E OS=Schistosoma mansoni GN=Smp_150440 PE=4 SV=1	4	66.907	0.0974959	1.01101	0.856309	1.8104	FALSE	16.8504166077015	17.0106588457372	16.3294698522924	15.4541397298232	16.7357856651734	15.4316932477064
G4VAM6	tr|G4VAM6|G4VAM6_SCHMA Glucose-6-phosphate 1-dehydrogenase OS=Schistosoma mansoni GN=Smp_052810 PE=3 SV=1	20	47.348	0.00723569	2.14052	-0.737079	1.6668	FALSE	21.4159653957474	21.565668983749	21.3798194011942	22.1532960898196	22.2634194685864	22.155974807827
G4VAP0	tr|G4VAP0|G4VAP0_SCHMA Putative ubiquitin protein ligase E3a (Fragment) OS=Schistosoma mansoni GN=Smp_172420 PE=4 SV=1	4	343.88	0.505613	0.296182	-0.427524	1.34492	FALSE	14.2306461792995	14.3839102485245	14.2138814179311	15.2062534936048	13.3369241375876	15.5678336187905
G4VAP5	tr|G4VAP5|G4VAP5_SCHMA Putative testis development protein nyd-sp29 OS=Schistosoma mansoni GN=Smp_136210 PE=4 SV=1	7	120.07	0.0271944	1.56552	-0.57213	1.48672	FALSE	17.1398683181246	17.3610404240687	17.3829171994243	17.7253221252559	17.895651248979	17.979242394443
G4VAQ2	tr|G4VAQ2|G4VAQ2_SCHMA Uncharacterized protein OS=Schistosoma mansoni GN=Smp_025860 PE=4 SV=1	9	9.0752	0.0159451	1.79737	-0.912064	1.88174	FALSE	24.121659310505	24.0912460336958	23.8943086666474	25.2070959289806	25.167592806085	24.4687177567994
G4VAQ5	tr|G4VAQ5|G4VAQ5_SCHMA Uncharacterized protein OS=Schistosoma mansoni GN=Smp_136140 PE=4 SV=1	3	60.779	0.173632	0.760371	-0.992045	1.989	FALSE	15.240687322356	13.5125371649315	15.959237563611	15.8523084054916	16.1573759369633	15.6789135705768
G4VAQ6	tr|G4VAQ6|G4VAQ6_SCHMA Proteasome subunit beta type OS=Schistosoma mansoni GN=Smp_025800 PE=3 SV=1	11	23.157	0.521869	0.282439	0.146089	1.10657	FALSE	23.3972247845808	23.2683991455356	23.0410204490901	23.0290564832819	23.3050205266604	22.9342997056664
G4VAR1	tr|G4VAR1|G4VAR1_SCHMA Pre-mRNA processing protein prp39-related OS=Schistosoma mansoni GN=Smp_170570 PE=4 SV=1	23	113.61	0.980778	0.00842913	-0.0204269	1.01426	FALSE	18.183534903771	18.5160066686284	19.3707831269912	18.9511936183034	17.071305909831	20.1091058254368
G4VAR3	tr|G4VAR3|G4VAR3_SCHMA Putative cation efflux protein/ zinc transporter OS=Schistosoma mansoni GN=Smp_170590 PE=4 SV=1	4	242.88	0.00681865	2.1663	-1.44497	2.72258	TRUE	13.2980158167032	13.5125371649315	13.7208770455038	15.2046280478653	15.3914726181252	14.2702473542597
G4VAR5	tr|G4VAR5|G4VAR5_SCHMA Putative zinc finger protein OS=Schistosoma mansoni GN=Smp_088940 PE=4 SV=1	3	35.931	1.4835e-05	4.82871	-4.15893	17.8633	TRUE	13.2980158167032	13.5125371649315	13.7208770455038	17.9260740492867	17.0962975935016	17.9858355912182
G4VAR6	tr|G4VAR6|G4VAR6_SCHMA Hypoxia upregulated 1 (Hyou1)-related OS=Schistosoma mansoni GN=Smp_088950 PE=3 SV=1	27	95.219	0.144854	0.839071	-0.352172	1.27648	FALSE	21.5070374329177	21.3902497690381	21.6287110575664	21.7163768604331	21.7600717737236	22.106065554183
G4VAS0	tr|G4VAS0|G4VAS0_SCHMA 40S ribosomal protein SA OS=Schistosoma mansoni GN=Smp_179180 PE=3 SV=1	10	33.295	0.00368538	2.43352	0.954392	1.93776	FALSE	25.8378663445044	25.9579330589318	25.8687982228384	24.8239515033439	25.179573651319	24.7978977094667
G4VAS5	tr|G4VAS5|G4VAS5_SCHMA Uncharacterized protein OS=Schistosoma mansoni GN=Smp_166340 PE=4 SV=1	1	14.439	0.0509824	1.29258	-0.638217	1.5564	FALSE	18.8982343476983	18.5239252485828	18.4202599997888	19.4516697930288	19.4175206684745	18.8878814799595
G4VAS9;G4VAT0	tr|G4VAS9|G4VAS9_SCHMA Cell polarity protein OS=Schistosoma mansoni GN=Smp_104030.3 PE=4 SV=1;tr|G4VAT0|G4VAT0_SCHMA Cell polarity protein OS=Schistosoma mansoni GN=Smp_104030.2 PE=4 SV=1	5	158.5	0.28597	0.543679	-0.766252	1.70085	FALSE	15.630489698678	14.5055648859702	16.2109626174547	16.7693534244749	15.0849111378451	16.7915098911552
G4VAT1	tr|G4VAT1|G4VAT1_SCHMA Uncharacterized protein OS=Schistosoma mansoni GN=Smp_180210 PE=4 SV=1	3	60.484	0.248173	0.605245	-0.757831	1.69095	FALSE	14.4208629797625	15.2497598966252	13.7208770455038	14.1952883624589	15.6860720792759	15.783633023506
G4VAT4	tr|G4VAT4|G4VAT4_SCHMA Uncharacterized protein OS=Schistosoma mansoni GN=Smp_103990 PE=4 SV=1	7	33.33	0.00124788	2.90383	1.38555	2.61272	TRUE	19.7656865357969	19.2167146555069	19.6026739448457	17.9466740768432	18.1760190442888	18.305728316028
G4VAT7	tr|G4VAT7|G4VAT7_SCHMA Serine/threonine kinase OS=Schistosoma mansoni GN=Smp_103950 PE=3 SV=1	9	44.439	0.538965	0.268439	0.605823	1.52185	FALSE	18.1685952639886	18.380164467119	18.7410389114118	18.226404727707	15.7807630169038	19.4651628596228
G4VAV1	tr|G4VAV1|G4VAV1_SCHMA Putative glycerol-3-phosphate dehydrogenase OS=Schistosoma mansoni GN=Smp_121990 PE=4 SV=1	17	75.137	0.744238	0.128288	0.18051	1.13328	FALSE	19.2099012614764	19.8971816436518	20.555958610827	20.0568443589344	18.804365282691	20.2603017002004
G4VAW4;G4VAW3	tr|G4VAW4|G4VAW4_SCHMA Putative hyperparathyroidism homolog OS=Schistosoma mansoni GN=Smp_144090.2 PE=4 SV=1;tr|G4VAW3|G4VAW3_SCHMA Putative hyperparathyroidism homolog OS=Schistosoma mansoni GN=Smp_144090.1 PE=4 SV=1	4	55.492	0.0986098	1.00608	1.4838	2.79685	FALSE	17.212555220432	16.4604670300153	16.5212583385464	15.6353320500442	16.4843154526711	13.623227705855
G4VAX2	tr|G4VAX2|G4VAX2_SCHMA Uncharacterized protein OS=Schistosoma mansoni GN=Smp_025680 PE=4 SV=1	3	24.242	0.000538883	3.26851	-1.62344	3.08108	TRUE	17.3237506118893	17.2000215796378	16.8398642803232	18.872808052629	18.8667678729179	18.4943699490578
G4VAX8	tr|G4VAX8|G4VAX8_SCHMA Uncharacterized protein OS=Schistosoma mansoni GN=Smp_115290 PE=4 SV=1	4	12.396	0.0024697	2.60736	1.41677	2.66988	TRUE	19.9655818544604	19.5888287026843	19.5131735853756	18.5004681419442	17.8327504800827	18.4840486527675
G4VAY2	tr|G4VAY2|G4VAY2_SCHMA Uncharacterized protein Smp_200920 OS=Schistosoma mansoni GN=Smp_200920 PE=4 SV=1	4	10.828	0.315337	0.501225	0.582704	1.49765	FALSE	22.3305939004101	22.5566788001725	22.8947315101509	22.268203941157	20.9045981050865	22.8610915359539
G4VAZ9	tr|G4VAZ9|G4VAZ9_SCHMA Uncharacterized protein OS=Schistosoma mansoni GN=Smp_210440 PE=3 SV=1	15	56.686	0.555737	0.25513	-0.123643	1.08948	FALSE	20.9705123827848	21.2074390512003	21.3579056521728	21.2689374385535	21.2855997858846	21.3522483066607
G4VB00	tr|G4VB00|G4VB00_SCHMA Uncharacterized protein OS=Schistosoma mansoni GN=Smp_210450 PE=4 SV=1	8	42.538	0.0450493	1.34631	1.44674	2.72591	FALSE	18.5997876068836	19.1877290375154	19.3751534619953	16.6138705254946	18.7051611080773	17.5034300369322
G4VB10	tr|G4VB10|G4VB10_SCHMA Katanin p60 ATPase-containing subunit A1 OS=Schistosoma mansoni GN=KATNA1 PE=3 SV=1	2	57.957	5.7474e-05	4.24053	-2.76671	6.80553	TRUE	15.0401511011862	14.8270384417856	14.4338344443175	17.2820105791777	17.8377416237635	17.4813964174673
G4VB13	tr|G4VB13|G4VB13_SCHMA Uncharacterized protein OS=Schistosoma mansoni GN=Smp_110280 PE=4 SV=1	7	67.071	0.331567	0.479429	1.5551	2.93855	FALSE	17.5125685388909	17.5400711546649	18.4619966293776	15.5884361040624	13.7082669587069	19.5526257008731
G4VB15	tr|G4VB15|G4VB15_SCHMA Sr-related ctd associated factor OS=Schistosoma mansoni GN=Smp_007180 PE=4 SV=1	6	126.94	0.0460247	1.33701	0.704919	1.63005	FALSE	18.2123538251583	17.3893487205308	17.583404373813	17.1503420281579	16.8657658273552	17.0542414688161
G4VB16	tr|G4VB16|G4VB16_SCHMA Uncharacterized protein OS=Schistosoma mansoni GN=Smp_007170 PE=4 SV=1	7	41.157	0.0845816	1.07272	0.468008	1.3832	FALSE	21.0259962610524	20.6242848169046	20.833240074804	20.3471891444879	20.5885659443516	20.1437431438001
G4VB23	tr|G4VB23|G4VB23_SCHMA Pol-related OS=Schistosoma mansoni GN=Smp_126020 PE=4 SV=1	17	62.925	0.0179165	1.74675	-0.903657	1.8708	FALSE	18.6350246493396	19.2073930974491	19.4951923145534	19.9429599799133	20.1218083286254	19.9838115787531
G4VB51	tr|G4VB51|G4VB51_SCHMA Uncharacterized protein OS=Schistosoma mansoni GN=Smp_196910 PE=4 SV=1	5	36.147	0.0136875	1.86368	2.97351	7.85447	FALSE	16.9978551556484	18.0056466434026	17.3082508949883	16.3615019947859	13.3388459562242	13.6908642669623
G4VB52	tr|G4VB52|G4VB52_SCHMA Uncharacterized protein OS=Schistosoma mansoni GN=Smp_040460 PE=4 SV=1	1	79.336	0.00823062	2.08457	2.72322	6.60346	TRUE	17.0911193749204	16.9738520437954	17.0391771182015	15.9047700722676	13.3388459562242	13.6908642669623
G4VB55	tr|G4VB55|G4VB55_SCHMA Glycine amidinotransferase OS=Schistosoma mansoni GN=Smp_144220 PE=4 SV=1	7	44.483	0.950164	0.0222013	0.100289	1.07199	FALSE	15.7564291766231	17.7380704131555	17.013933426657	19.092778415434	13.3388459562242	17.775940306329
G4VB57	tr|G4VB57|G4VB57_SCHMA Peptidylprolyl isomerase OS=Schistosoma mansoni GN=Smp_040500 PE=4 SV=1	14	39.397	0.0200534	1.69781	-0.587533	1.50267	FALSE	20.3954444500144	20.4329791005194	20.4758289993623	20.9388570780635	21.1711222642326	20.9568713176205
G4VB62;G4VB58	tr|G4VB62|G4VB62_SCHMA Putative alpha-mannoside beta-1,6-n-acetylglucosaminyltransferase OS=Schistosoma mansoni GN=Smp_144260 PE=4 SV=1;tr|G4VB58|G4VB58_SCHMA Putative alpha-mannoside beta-1,6-n-acetylglucosaminyltransferase OS=Schistosoma mansoni GN=Smp_0	2	43.1	0.00898417	2.04652	-1.99624	3.98959	TRUE	14.9950949113557	15.0817703034715	13.7208770455038	16.7246867597788	17.1897473671285	15.872030926626
G4VB63	tr|G4VB63|G4VB63_SCHMA Putative atp-dependent transporter OS=Schistosoma mansoni GN=Smp_040540 PE=4 SV=1	18	73.216	0.0515958	1.28739	0.530023	1.44395	FALSE	21.4562794080444	21.0009086374686	21.3349616325662	20.7482273367582	20.861577893801	20.5922747775261
G4VB67	tr|G4VB67|G4VB67_SCHMA Cytoplasmic tRNA 2-thiolation protein 1 OS=Schistosoma mansoni GN=Smp_040560 PE=3 SV=1	1	35.896	0.0244073	1.61248	1.11769	2.16999	FALSE	15.4240666485605	15.0137314108414	14.3634533925327	14.1263264038421	13.3388459562242	13.9830125419236
G4VB69;G4VB68	tr|G4VB69|G4VB69_SCHMA Putative rab5 OS=Schistosoma mansoni GN=Smp_040570.1 PE=4 SV=1;tr|G4VB68|G4VB68_SCHMA Putative rab5 OS=Schistosoma mansoni GN=Smp_040570.2 PE=4 SV=1	12	21.918	0.032607	1.48669	-0.597464	1.51305	FALSE	22.2990937812609	22.7897951946031	22.5403688590424	23.1957063526913	23.1892123757219	23.0367301885906
G4VB75;G4VB73;A0A146MG81	tr|G4VB75|G4VB75_SCHMA Putative cytoplasmic dynein light chain OS=Schistosoma mansoni GN=Smp_040680 PE=4 SV=1;tr|G4VB73|G4VB73_SCHMA Uncharacterized protein Smp_200180 OS=Schistosoma mansoni GN=Smp_200180 PE=4 SV=1;tr|A0A146MG81|A0A146MG81_SCHMA Uncharacte	1	10.327	0.138836	0.857498	3.7507	13.4609	FALSE	18.4183973506965	22.4841607220765	22.0228671921736	21.2318839119333	13.3388459562242	17.1026005283109
G4VB90	tr|G4VB90|G4VB90_SCHMA Putative ubiquitin-conjugating enzyme E2r OS=Schistosoma mansoni GN=Smp_055960 PE=3 SV=1	6	32.379	0.00162188	2.78998	1.32932	2.51283	TRUE	20.3010127788147	20.829599334366	20.4668833920883	19.446595683618	19.0632151697345	19.0997386604408
G4VBB0	tr|G4VBB0|G4VBB0_SCHMA Uncharacterized protein OS=Schistosoma mansoni GN=Smp_102490 PE=4 SV=1	3	33.413	0.190101	0.721015	1.97408	3.92877	FALSE	18.6781979600907	18.2608465604536	18.2409647110609	17.3692154508179	13.3388459562242	18.5497131257771
G4VBD2	tr|G4VBD2|G4VBD2_SCHMA Gamma-tubulin complex component OS=Schistosoma mansoni GN=Smp_159180 PE=3 SV=1	4	96.583	0.531095	0.274828	-0.279963	1.21416	FALSE	15.831011639931	15.3409893816203	16.3552616862086	16.1553848209363	15.4913656718549	16.7204023244909
G4VBD5;I6TMT9	tr|G4VBD5|G4VBD5_SCHMA Putative dead box ATP-dependent RNA helicase OS=Schistosoma mansoni GN=Smp_068440 PE=4 SV=1;tr|I6TMT9|I6TMT9_SCHMA Vasa-like DEAD-box RNA helicase (Fragment) OS=Schistosoma mansoni GN=vlg3 PE=2 SV=1	7	103.73	0.00536351	2.27055	1.08731	2.12477	TRUE	17.68493897142	17.7423268097232	17.2922491576274	16.5313152070653	16.1775239612101	16.7487504865289
G4VBF0	tr|G4VBF0|G4VBF0_SCHMA Putative rabkinesin-6 OS=Schistosoma mansoni GN=Smp_137660 PE=3 SV=1	15	138.01	0.000314127	3.50289	-2.6684	6.35722	TRUE	15.114514746563	15.7329461054997	15.7903687315955	18.2070095423805	17.7106128956409	18.7253923132564
G4VBF1	tr|G4VBF1|G4VBF1_SCHMA Mannose-1-phosphate guanyltransferase OS=Schistosoma mansoni GN=Smp_028730 PE=4 SV=1	9	35.084	0.000166708	3.77804	-1.65808	3.15596	TRUE	19.1709808273447	19.5212289322285	19.3252208385763	21.0076200533922	21.0161234307018	20.9679184088986
G4VBF2	tr|G4VBF2|G4VBF2_SCHMA Uncharacterized protein OS=Schistosoma mansoni GN=Smp_137650 PE=4 SV=1	12	131.7	0.0418508	1.3783	2.02653	4.07423	FALSE	17.1021907285075	17.4859377175314	17.2943018424046	14.8807357660975	13.9308829670319	16.9912316712903
G4VBF7	tr|G4VBF7|G4VBF7_SCHMA Uncharacterized protein Smp_201730 OS=Schistosoma mansoni GN=Smp_201730 PE=4 SV=1	2	11.289	0.263888	0.57858	-0.327874	1.25516	FALSE	18.4783057143744	17.7741970051714	18.3779790316533	18.7048503441247	18.5482633967163	18.3609902563632
G4VBG0	tr|G4VBG0|G4VBG0_SCHMA Kettin/titin-related protein OS=Schistosoma mansoni GN=Smp_123770 PE=4 SV=1	8	49.707	0.921729	0.0353966	-0.0394326	1.02771	FALSE	17.2159076759093	17.5671111817548	16.9646610737471	18.0032237518247	16.7433071976611	17.1194467779616
G4VBG2	tr|G4VBG2|G4VBG2_SCHMA Putative ring finger protein 11 (Sid 1669) (Nedd4 ww domain-binding protein 2) OS=Schistosoma mansoni GN=Smp_047700 PE=4 SV=1	10	52.493	0.0130984	1.88278	3.56143	11.8058	FALSE	19.5538199990178	19.1969929650829	19.0052225005099	16.6714079823711	13.3388459562242	17.0615062080422
G4VBG5;G4VBG4	tr|G4VBG5|G4VBG5_SCHMA Ferritin OS=Schistosoma mansoni GN=Smp_047660 PE=3 SV=1;tr|G4VBG4|G4VBG4_SCHMA Ferritin OS=Schistosoma mansoni GN=Smp_047680 PE=3 SV=1	6	20.934	0.00268341	2.57131	-1.64018	3.11704	TRUE	21.7861509605378	21.8721443913928	21.5687342817536	23.5511439346945	23.8338037365956	22.7626135736194
G4VBG8	tr|G4VBG8|G4VBG8_SCHMA Putative adp-ribosylglycohydrolase OS=Schistosoma mansoni GN=Smp_147630 PE=4 SV=1	6	39.532	0.830574	0.0806218	0.0900822	1.06443	FALSE	18.1068065231289	19.1578637706795	18.3273664004467	18.1020096110997	19.0325130851319	18.1872672610713
G4VBH0	tr|G4VBH0|G4VBH0_SCHMA Cell division control protein 45-related OS=Schistosoma mansoni GN=Smp_047610 PE=4 SV=1	3	65.507	0.0269769	1.56901	-1.61601	3.06526	FALSE	13.2980158167032	14.7494266825374	15.0896906346074	15.5683753570509	16.5719271054908	15.8448588589124
G4VBH2	tr|G4VBH2|G4VBH2_SCHMA Uncharacterized protein OS=Schistosoma mansoni GN=Smp_210320 PE=4 SV=1	12	39.852	0.00544099	2.26432	1.13954	2.20311	TRUE	21.4239593943638	21.5388025463593	21.2734978638962	20.3441694567122	20.6243703874083	19.8490879790629
G4VBH5	tr|G4VBH5|G4VBH5_SCHMA Putative peptide chain release factor OS=Schistosoma mansoni GN=Smp_211090 PE=4 SV=1	11	49.071	0.00966002	2.01502	0.71633	1.643	FALSE	19.7664183459308	19.533451178734	19.7558246088471	18.8721020388313	18.9977170384758	19.0368852842264
G4VBH6	tr|G4VBH6|G4VBH6_SCHMA Putative peptide chain release factor OS=Schistosoma mansoni GN=Smp_211100 PE=4 SV=1	20	90.558	0.411316	0.385825	-0.751816	1.68391	FALSE	17.7753303008534	18.5476050174058	19.5119491153042	19.6455879919294	17.7473253751311	20.6974196698779
G4VBH9	tr|G4VBH9|G4VBH9_SCHMA Putative nedd4-binding protein 2 OS=Schistosoma mansoni GN=Smp_147600 PE=4 SV=1	3	88.076	0.735628	0.133341	0.154486	1.11303	FALSE	15.4962062536408	15.5712595318626	15.3554364630022	15.2326197755834	16.1854367717833	14.5413875980779
G4VBI3	tr|G4VBI3|G4VBI3_SCHMA Putative snare protein ykt6 OS=Schistosoma mansoni GN=Smp_047450 PE=3 SV=1	5	22.752	0.616844	0.209825	-0.181653	1.13418	FALSE	18.8764950128199	19.3175722982881	19.5719576042879	18.9116960100764	19.4728198138333	19.9264668925928
G4VBI8	tr|G4VBI8|G4VBI8_SCHMA Uncharacterized protein OS=Schistosoma mansoni GN=Smp_047400 PE=4 SV=1	1	20.191	0.117918	0.928421	2.18811	4.55708	FALSE	18.5295881690759	18.4422052657198	17.6349788512841	13.2833653882194	17.8065536343346	16.9525254110078
G4VBJ0	tr|G4VBJ0|G4VBJ0_SCHMA Malate dehydrogenase OS=Schistosoma mansoni GN=Smp_047370 PE=3 SV=1	16	36.328	0.0560535	1.2514	-0.622343	1.53937	FALSE	25.089523418862	25.2712528025173	25.4999928067437	26.0977983622397	25.5041297357399	26.1258692180635
G4VBJ1;G4VBJ2	tr|G4VBJ1|G4VBJ1_SCHMA Ubx6(Yeast)-related OS=Schistosoma mansoni GN=Smp_047360.2 PE=4 SV=1;tr|G4VBJ2|G4VBJ2_SCHMA Ubx6(Yeast)-related OS=Schistosoma mansoni GN=Smp_047360.1 PE=4 SV=1	8	34.608	0.398457	0.399618	-0.246262	1.18613	FALSE	21.4424654316216	20.9993833443554	21.0727994351872	21.4223938506274	21.7764938238546	21.0545479017035
G4VBK2	tr|G4VBK2|G4VBK2_SCHMA Uncharacterized protein OS=Schistosoma mansoni GN=Smp_044810 PE=4 SV=1	16	74.912	0.121157	0.916651	2.16336	4.47958	FALSE	19.123039347937	19.183390101791	19.373617260669	18.297310206157	14.2433325780269	18.6493118822368
G4VBK5	tr|G4VBK5|G4VBK5_SCHMA Ribokinase OS=Schistosoma mansoni GN=Smp_044850 PE=3 SV=1	4	39.147	0.00343212	2.46444	4.36712	20.6364	TRUE	18.69222642235	19.562106583633	18.4554381045141	16.5787110750704	13.3388459562242	13.6908642669623
G4VBK6	tr|G4VBK6|G4VBK6_SCHMA Putative dead box ATP-dependent RNA helicase OS=Schistosoma mansoni GN=Smp_146340 PE=3 SV=1	9	70.24	0.078479	1.10525	2.2446	4.73907	FALSE	14.2380516845137	17.0194801269277	17.6180520973585	13.3884131488875	13.3388459562242	15.4145166413686
G4VBL1	tr|G4VBL1|G4VBL1_SCHMA Uncharacterized protein OS=Schistosoma mansoni GN=Smp_123340 PE=4 SV=1	1	40.205	0.000294491	3.53093	2.4779	5.57087	TRUE	16.4938661868039	15.7481131206361	15.5048069244731	13.2833653882194	13.3388459562242	13.6908642669623
G4VBL5	tr|G4VBL5|G4VBL5_SCHMA Uncharacterized protein OS=Schistosoma mansoni GN=Smp_096900 PE=4 SV=1	5	62.428	0.0720332	1.14247	-0.547952	1.46201	FALSE	16.8547586008072	17.0745326877525	17.1238211938216	17.7761621709187	17.7536364761808	17.1671704165003
G4VBM7	tr|G4VBM7|G4VBM7_SCHMA Protein RER1 OS=Schistosoma mansoni GN=Smp_099690 PE=3 SV=1	3	22.8	0.134084	0.872625	-2.21375	4.63878	FALSE	16.4981680996484	13.5125371649315	18.1008099786271	17.445409646852	17.6774460317057	19.6298959161589
G4VBM8	tr|G4VBM8|G4VBM8_SCHMA Putative hypoxia associated factor OS=Schistosoma mansoni GN=Smp_176840 PE=4 SV=1	15	86.194	0.0149426	1.82557	1.17599	2.25948	FALSE	19.623155516311	19.3065886677404	19.3105908505247	17.5827082109167	18.4012742214134	18.7283780429821
G4VBN1	tr|G4VBN1|G4VBN1_SCHMA Fragile X related 1, frx1 OS=Schistosoma mansoni GN=Smp_099630 PE=4 SV=1	17	65.843	0.0321668	1.49259	0.646427	1.56529	FALSE	21.6521894942347	21.7739410314496	21.8395988020098	21.2312818751851	20.7647828935605	21.3303821567919
G4VBN2	tr|G4VBN2|G4VBN2_SCHMA Elav (Embryonic lethal, abnormal vision,drosophila)-like protein OS=Schistosoma mansoni GN=Smp_176810 PE=4 SV=1	2	45.987	0.000104394	3.98132	2.86859	7.30352	TRUE	15.770869808484	16.6829519940915	16.4650268530503	13.2833653882194	13.3388459562242	13.6908642669623
G4VBN3	tr|G4VBN3|G4VBN3_SCHMA Serine/threonine kinase OS=Schistosoma mansoni GN=Smp_103570 PE=4 SV=1	2	59.655	0.21229	0.67307	0.811645	1.75521	FALSE	15.5337850248006	15.9992798312705	16.3112498635891	13.8896931563989	15.8100481072386	15.7096379359609
G4VBN6	tr|G4VBN6|G4VBN6_SCHMA Succinate--CoA ligase [GDP-forming] subunit beta, mitochondrial OS=Schistosoma mansoni GN=Smp_060820 PE=3 SV=1	3	47.941	0.800819	0.0964656	-0.115285	1.08319	FALSE	16.2045314017202	17.2512941662928	17.8220789965346	17.2549156587541	17.3278604425407	17.0409847064874
G4VBN8	tr|G4VBN8|G4VBN8_SCHMA Uncharacterized protein OS=Schistosoma mansoni GN=Smp_154830 PE=4 SV=1	7	118.31	0.235014	0.628907	-0.720216	1.64743	FALSE	15.8012540941429	14.9092559953776	15.2385385708826	15.1468438772238	15.8884906025678	17.0743632644863
G4VBP0	tr|G4VBP0|G4VBP0_SCHMA Uncharacterized protein OS=Schistosoma mansoni GN=Smp_060860 PE=4 SV=1	2	72.625	0.457041	0.340045	-0.94002	1.91855	FALSE	17.6518553694698	17.3746911971847	17.5330114409709	18.719103074837	20.743886778109	15.9166283344416
G4VBP5;G4VBP4	tr|G4VBP5|G4VBP5_SCHMA U4/U6-associated RNA splicing factor-related OS=Schistosoma mansoni GN=Smp_060900.2 PE=4 SV=1;tr|G4VBP4|G4VBP4_SCHMA U4/U6-associated RNA splicing factor-related OS=Schistosoma mansoni GN=Smp_060900.1 PE=4 SV=1	8	47.108	0.0366556	1.43586	1.65591	3.15122	FALSE	19.0602313730981	19.0431037314536	19.1257436767262	17.9695028616691	16.0219653470396	18.2698810217468
G4VBP6	tr|G4VBP6|G4VBP6_SCHMA Putative small nuclear ribonucleoprotein f (Snrnp-f) OS=Schistosoma mansoni GN=Smp_060910 PE=3 SV=1	5	9.685	0.429527	0.36701	-0.351254	1.27567	FALSE	19.927503802756	21.1509152605222	19.9157773989366	20.4387646618871	20.5536986769116	21.0554938278925
G4VBP9;G4VBQ0	tr|G4VBP9|G4VBP9_SCHMA Protein kinase OS=Schistosoma mansoni GN=Smp_060940.2 PE=4 SV=1;tr|G4VBQ0|G4VBQ0_SCHMA Protein kinase OS=Schistosoma mansoni GN=Smp_060940.1 PE=4 SV=1	4	110.15	0.0184851	1.73318	1.75802	3.38234	FALSE	14.61692041452	15.5827268289353	16.2177079102115	13.2833653882194	13.3388459562242	14.5210787054406
G4VBQ1	tr|G4VBQ1|G4VBQ1_SCHMA Putative soluble NSF attachment protein (SNAP) OS=Schistosoma mansoni GN=Smp_060950 PE=4 SV=1	12	32.485	0.203948	0.690481	0.371821	1.29399	FALSE	20.99237629356	20.7525668017415	20.8210312948495	20.5224844981655	20.8463395448307	20.0816868303261
G4VBQ8	tr|G4VBQ8|G4VBQ8_SCHMA Putative pold3 protein OS=Schistosoma mansoni GN=Smp_154930 PE=4 SV=1	3	49.642	0.480402	0.318395	0.258191	1.19598	FALSE	16.8160858932256	16.9437151853577	16.9683797306154	16.2991825778569	17.3550717102704	16.2993539666527
G4VBQ9	tr|G4VBQ9|G4VBQ9_SCHMA Putative f-actin capping protein beta subunit (Fragment) OS=Schistosoma mansoni GN=Smp_100370 PE=4 SV=1	4	6.1999	0.101064	0.995404	0.421793	1.33959	FALSE	22.5599995646165	22.2780854742667	22.4247565121272	21.9716413904326	22.243185488626	21.7826366796004
G4VBS1	tr|G4VBS1|G4VBS1_SCHMA Uncharacterized protein OS=Schistosoma mansoni GN=Smp_045250 PE=4 SV=1	10	47.359	0.781522	0.107059	-0.072727	1.0517	FALSE	19.556466903789	19.5557135242394	19.9285353951067	19.5310356962554	19.6215347953253	20.1063264000552
G4VBS3	tr|G4VBS3|G4VBS3_SCHMA Putative myosin light chain 1 OS=Schistosoma mansoni GN=Smp_045220 PE=4 SV=1	11	12.283	0.0718186	1.14376	-0.910708	1.87997	FALSE	21.8267882465522	22.4699132958774	20.9960558496417	22.8425836362004	22.3784896521122	22.803807099762
G4VBT2;G4VBT0;G4VBT1	tr|G4VBT2|G4VBT2_SCHMA Putative serine/arginine rich splicing factor OS=Schistosoma mansoni GN=Smp_113620.1 PE=4 SV=1;tr|G4VBT0|G4VBT0_SCHMA Putative serine/arginine rich splicing factor OS=Schistosoma mansoni GN=Smp_113620.2 PE=4 SV=1;tr|G4VBT1|G4VBT1_SCH	5	11.963	0.0147332	1.8317	0.902991	1.86994	FALSE	23.4682415075857	23.506905987969	23.4780254079916	22.9774227131734	22.1561201008933	22.6106564500325
G4VBT5	tr|G4VBT5|G4VBT5_SCHMA Putative f-actin capping protein beta subunit OS=Schistosoma mansoni GN=Smp_186650 PE=4 SV=1	5	27.082	0.139106	0.856653	0.337045	1.26317	FALSE	20.7044978167488	20.9919326963309	20.7761427123677	20.6230789686167	20.4605309374217	20.3778271299343
G4VBU6	tr|G4VBU6|G4VBU6_SCHMA Proteasome endopeptidase complex OS=Schistosoma mansoni GN=Smp_207080 PE=3 SV=1	12	25.711	0.630603	0.200244	0.154525	1.11306	FALSE	22.5205545518302	22.6692916148231	22.4618190778371	22.5938543441011	22.7780966681705	21.8161385860792
G4VBU8	tr|G4VBU8|G4VBU8_SCHMA Putative translation initiation factor eif-2b beta subunit OS=Schistosoma mansoni GN=Smp_014620 PE=3 SV=1	9	40.665	0.0467768	1.32997	-0.658662	1.57862	FALSE	18.1498582490935	18.2610236814803	18.1763962488984	19.0435416036866	19.1288472196255	18.3908767938522
G4VBV1	tr|G4VBV1|G4VBV1_SCHMA 40S ribosomal protein S30 OS=Schistosoma mansoni GN=Smp_014650 PE=3 SV=1	1	14.695	0.000435401	3.36111	1.46721	2.76488	TRUE	24.4573066028481	24.1240998002924	24.0636984106448	22.6584405940015	22.7812139879678	22.803807099762
G4VBV5;G4VBV6	tr|G4VBV5|G4VBV5_SCHMA Adducin related protein OS=Schistosoma mansoni GN=Smp_014670.2 PE=4 SV=1;tr|G4VBV6|G4VBV6_SCHMA Adducin related protein OS=Schistosoma mansoni GN=Smp_014670.1 PE=4 SV=1	10	92.159	0.0159948	1.79602	-0.947115	1.92801	FALSE	18.1318688599779	18.4103011331831	18.3631166201073	19.366711532038	18.7651020199992	19.614818308628
G4VBV9	tr|G4VBV9|G4VBV9_SCHMA Putative ubiquitin 1 OS=Schistosoma mansoni GN=Smp_130170 PE=4 SV=1	2	8.8623	0.302101	0.519848	-1.19319	2.28657	FALSE	19.7539037430421	19.6527949112369	15.9862945847143	19.6746000671044	19.3945156376902	19.903435697537
G4VBW0	tr|G4VBW0|G4VBW0_SCHMA Uncharacterized protein OS=Schistosoma mansoni GN=Smp_130180 PE=4 SV=1	11	192.4	0.0267781	1.57222	1.85784	3.62464	FALSE	16.0748610431994	16.1159750516583	16.5772358056761	14.1110886216865	13.3388459562242	15.7446274524724
G4VBW4;G4VBW5	tr|G4VBW4|G4VBW4_SCHMA Putative alpha-actinin OS=Schistosoma mansoni GN=Smp_014780.2 PE=4 SV=1;tr|G4VBW5|G4VBW5_SCHMA Putative alpha-actinin OS=Schistosoma mansoni GN=Smp_014780.1 PE=4 SV=1	38	104.94	0.286554	0.542793	0.214246	1.1601	FALSE	22.3137178078169	22.1074971285898	22.2116385676879	21.9386990408873	22.0679607019561	21.9834566110961
G4VBW9;G4VBW8	tr|G4VBW9|G4VBW9_SCHMA Actin-related protein 2, arp2 OS=Schistosoma mansoni GN=Smp_101290.1 PE=3 SV=1;tr|G4VBW8|G4VBW8_SCHMA Actin-related protein 2, arp2 OS=Schistosoma mansoni GN=Smp_101290.2 PE=3 SV=1	7	37.341	0.0724287	1.14009	-0.775798	1.71214	FALSE	20.3047644217157	19.2858695883546	20.4659984194202	20.8304256246564	20.7379949077188	20.8156069325351
G4VBX0;G4VBX1	tr|G4VBX0|G4VBX0_SCHMA PRA1 family protein OS=Schistosoma mansoni GN=Smp_014800.1 PE=3 SV=1;tr|G4VBX1|G4VBX1_SCHMA PRA1 family protein OS=Schistosoma mansoni GN=Smp_014800.2 PE=3 SV=1	1	16.306	0.0208904	1.68005	-0.739604	1.66972	FALSE	18.1981180301021	18.5438248060205	18.4860421033443	19.031103652149	18.9532434096131	19.4624484749257
G4VBX5	tr|G4VBX5|G4VBX5_SCHMA Putative dreadlocks/dock OS=Schistosoma mansoni GN=Smp_014850 PE=4 SV=1	3	77.188	0.00851885	2.06962	0.768526	1.70353	FALSE	15.6093128121853	15.9218127939742	15.8284830631888	14.9887311026793	15.1405719679273	14.9247285844846
G4VBY0	tr|G4VBY0|G4VBY0_SCHMA Putative pre-mRNA-splicing factor CLF1 OS=Schistosoma mansoni GN=Smp_148230 PE=4 SV=1	7	109.8	0.00368679	2.43335	1.90368	3.74165	TRUE	17.2436335316175	16.5346897040624	17.6887665689354	15.6521262813104	15.4021556998923	14.7017786201682
G4VBY2;G4VBY1	tr|G4VBY2|G4VBY2_SCHMA Putative sumo-1-activating enzyme E1a OS=Schistosoma mansoni GN=Smp_048760.1 PE=4 SV=1;tr|G4VBY1|G4VBY1_SCHMA Putative sumo-1-activating enzyme E1a OS=Schistosoma mansoni GN=Smp_048760.2 PE=4 SV=1	9	39.189	0.105047	0.978618	0.668822	1.58977	FALSE	21.000271877492	21.2119697900806	21.4845946415409	20.6743469849108	21.080229224874	19.9357926848649
G4VBY8	tr|G4VBY8|G4VBY8_SCHMA Uncharacterized protein OS=Schistosoma mansoni GN=Smp_048830 PE=4 SV=1	1	10.98	0.379304	0.421012	0.215479	1.16109	FALSE	19.2121859742848	19.4264006140273	19.0004456488871	19.2013997558202	18.7687585334015	19.0224356585962
G4VBZ2	tr|G4VBZ2|G4VBZ2_SCHMA Divalent cation tolerance cuta-related OS=Schistosoma mansoni GN=Smp_048870 PE=4 SV=1	1	14.517	0.0255686	1.59229	0.59243	1.50778	FALSE	19.279802138715	18.9481220464884	19.0726499511826	18.3949096364937	18.6221468651996	18.5062266231147
G4VBZ3	tr|G4VBZ3|G4VBZ3_SCHMA Uncharacterized protein OS=Schistosoma mansoni GN=Smp_048880 PE=4 SV=1	4	13.373	0.000260927	3.58348	1.47668	2.78308	TRUE	20.2313785042539	20.0899691607552	20.3218148304344	18.766008221967	18.8077280955607	18.6393722152586
G4VBZ7	tr|G4VBZ7|G4VBZ7_SCHMA Putative ran-binding protein OS=Schistosoma mansoni GN=Smp_048930 PE=4 SV=1	2	23.017	0.0633868	1.198	-0.747887	1.67933	FALSE	17.8857016691314	18.6541779178469	18.7882097646285	19.1961030668315	19.4945578577302	18.8810882108848
G4VBZ8	tr|G4VBZ8|G4VBZ8_SCHMA Williams-beuren syndrome critical region protein-related OS=Schistosoma mansoni GN=Smp_048940 PE=4 SV=1	4	25.75	0.172835	0.762368	-0.53087	1.4448	FALSE	18.9548676347135	19.9315264450767	19.5129532574459	20.1258415458168	20.2834322132878	19.5826829347293
G4VBZ9	tr|G4VBZ9|G4VBZ9_SCHMA Putative uveal autoantigen with coiled-coil domains and ankyrin repeats protein (Beta-actin-binding protein) (BetaCAP73) OS=Schistosoma mansoni GN=Smp_148370 PE=4 SV=1	6	164.66	0.0040868	2.38862	-2.14855	4.43383	TRUE	12.8751318330978	13.5125371649315	13.7208770455038	15.9977241337979	15.9489740209965	14.6075099589519
G4VC04	tr|G4VC04|G4VC04_SCHMA Rna-binding protein related OS=Schistosoma mansoni GN=Smp_049010 PE=4 SV=1	4	69.59	3.54229e-06	5.45072	3.70204	13.0144	TRUE	17.3140228595089	17.0430522332994	17.0621139294787	13.2833653882194	13.3388459562242	13.6908642669623
G4VC10	tr|G4VC10|G4VC10_SCHMA Uncharacterized protein OS=Schistosoma mansoni GN=Smp_148440 PE=4 SV=1	5	46.229	0.121506	0.915403	2.88594	7.3919	FALSE	17.3586255240969	20.45636992634	20.4309245208421	17.9890485980836	13.3388459562242	18.2601923003392
G4VC11	tr|G4VC11|G4VC11_SCHMA Putative chitinase OS=Schistosoma mansoni GN=Smp_148450 PE=4 SV=1	10	49.215	0.726075	0.139019	0.0671962	1.04768	FALSE	20.5980414999002	20.5102626120821	20.5824481047854	20.622751105733	20.4652936783541	20.4011188052114
G4VC15	tr|G4VC15|G4VC15_SCHMA Aspartate aminotransferase OS=Schistosoma mansoni GN=Smp_049150 PE=4 SV=1	16	45.644	0.0265575	1.57581	-0.706261	1.63157	FALSE	21.2478156158308	21.619587235139	21.3707290894213	22.1119859131268	22.4083131655927	21.836616913296
G4VC17	tr|G4VC17|G4VC17_SCHMA Putative camp-regulated phosphoprotein OS=Schistosoma mansoni GN=Smp_049170 PE=3 SV=1	1	14.25	0.0168034	1.7746	4.97217	31.3885	FALSE	20.2153718062621	20.3903003730488	19.5362191195233	13.2833653882194	13.3388459562242	18.6031840040351
G4VC18	tr|G4VC18|G4VC18_SCHMA Putative cleavage and polyadenylation specificity factor cpsf OS=Schistosoma mansoni GN=Smp_148480 PE=4 SV=1	11	203.95	0.375417	0.425486	-0.795562	1.73575	FALSE	13.7330342114245	14.6791131005858	17.0029580828363	15.8211165224619	16.0326302841697	15.9480460710628
G4VC21	tr|G4VC21|G4VC21_SCHMA Uncharacterized protein OS=Schistosoma mansoni GN=Smp_148510 PE=3 SV=1	14	41.774	0.176475	0.753316	-0.361785	1.28501	FALSE	21.2034138199289	21.0867876383932	20.9507747164875	21.3694030696544	21.7781590806228	21.1787677259878
G4VC25	tr|G4VC25|G4VC25_SCHMA Rab GDP dissociation inhibitor OS=Schistosoma mansoni GN=Smp_094420 PE=3 SV=1	26	50.273	0.496972	0.303668	-0.13162	1.09552	FALSE	24.0974401640465	24.0743374229572	23.9173829564174	24.2251612632202	24.0990049772809	24.1598545729674
G4VC26	tr|G4VC26|G4VC26_SCHMA Rab GDP dissociation inhibitor OS=Schistosoma mansoni GN=Smp_024520 PE=3 SV=1	13	50.729	0.000464459	3.33305	-1.69233	3.23178	TRUE	19.8295373749326	20.4522068602188	20.0153859087827	21.8597406203388	21.8616171630973	21.652756791288
G4VC35	tr|G4VC35|G4VC35_SCHMA ADP-ribosylation factor-like 6, arl6 OS=Schistosoma mansoni GN=Smp_105480 PE=3 SV=1	3	21.466	4.78602e-06	5.32003	-4.58173	23.9463	TRUE	13.2980158167032	13.5125371649315	13.7208770455038	18.3474431456842	18.3102437821953	17.6189438194708
G4VC46	tr|G4VC46|G4VC46_SCHMA Putative dna-directed rna polymerase II 19 kD polypeptide rpb7 OS=Schistosoma mansoni GN=Smp_128840 PE=4 SV=1	3	21.816	0.738469	0.131668	0.291245	1.2237	FALSE	19.5909067625551	17.689152037184	19.8142522965558	19.5079295395882	19.3839024904562	17.3287436613962
G4VC49	tr|G4VC49|G4VC49_SCHMA Uncharacterized protein OS=Schistosoma mansoni GN=Smp_012410 PE=4 SV=1	9	43.231	0.00317658	2.49804	1.24225	2.36568	TRUE	20.1710844580627	20.0864753464594	20.0978749530057	19.0574461248928	18.4274870718677	19.1437431438001
G4VC55;Q1WL54;G4VC56	tr|G4VC55|G4VC55_SCHMA Venom allergen-like (VAL) 11 protein OS=Schistosoma mansoni GN=Smp_012350.1 PE=4 SV=1;tr|Q1WL54|Q1WL54_SCHMA Venom allergen-like protein 11 OS=Schistosoma mansoni PE=2 SV=1;tr|G4VC56|G4VC56_SCHMA Venom allergen-like (VAL) 11 protein	2	44.905	0.843676	0.0738243	-0.0590096	1.04175	FALSE	16.6443108106737	16.324236989953	16.46174297763	16.9140773150259	16.6499740811286	16.0432680390852
G4VC58	tr|G4VC58|G4VC58_SCHMA Ubiquitin-specific peptidase 4 (C19 family) OS=Schistosoma mansoni GN=Smp_128770 PE=3 SV=1	21	98.829	0.00213813	2.66997	0.988003	1.98344	FALSE	21.0221715105597	21.0230092581194	20.898789198908	19.9948569984812	20.1278288373971	19.8572736517737
G4VC62	tr|G4VC62|G4VC62_SCHMA Uncharacterized protein OS=Schistosoma mansoni GN=Smp_012280 PE=4 SV=1	8	37.278	0.0121678	1.91479	1.62003	3.07381	FALSE	21.004251996201	20.3794304579244	19.8252175441928	19.0011265178828	19.2776752890802	18.0700189740263
G4VC69	tr|G4VC69|G4VC69_SCHMA Putative tryptophanyl-tRNA synthetase OS=Schistosoma mansoni GN=Smp_082860 PE=3 SV=1	17	47.067	0.00185071	2.73266	1.10805	2.15554	TRUE	22.379583392828	22.1679290361929	22.1738899309458	21.1115186434739	21.3351414696863	20.950589686793
G4VC72;G4VC71	tr|G4VC72|G4VC72_SCHMA Putative cullin OS=Schistosoma mansoni GN=Smp_082850.2 PE=3 SV=1;tr|G4VC71|G4VC71_SCHMA Putative cullin OS=Schistosoma mansoni GN=Smp_082850.1 PE=3 SV=1	11	86.749	0.826272	0.0828769	-0.0883398	1.06315	FALSE	16.6839128793705	16.8066529539691	17.7424595861114	17.5595993673067	16.7244984218959	17.2139468937471
G4VC76;Q8I899;G4VC77	tr|G4VC76|G4VC76_SCHMA Cell polarity protein OS=Schistosoma mansoni GN=Smp_082810.2 PE=3 SV=1;tr|Q8I899|Q8I899_SCHMA Cdc42 (Fragment) OS=Schistosoma mansoni GN=Cdc42 PE=2 SV=1;tr|G4VC77|G4VC77_SCHMA Cell polarity protein OS=Schistosoma mansoni GN=Smp_08281	3	21.839	0.500445	0.300644	0.792007	1.73148	FALSE	18.429240155292	18.3577730849461	18.4604740495126	19.4601214404925	18.3176827380311	15.0936610799616
G4VC78	tr|G4VC78|G4VC78_SCHMA Sly1-related OS=Schistosoma mansoni GN=Smp_082800 PE=3 SV=1	14	66.719	0.273817	0.562539	0.434832	1.35175	FALSE	18.5696552744619	19.0773767765587	18.1347451883615	18.4897785972911	18.348899647794	17.6386029317419
G4VC79	tr|G4VC79|G4VC79_SCHMA General transcription factor IIH subunit 4 OS=Schistosoma mansoni GN=Smp_082790 PE=3 SV=1	2	55.094	0.564579	0.248275	0.389799	1.31021	FALSE	14.5912940251198	13.8261768169305	15.4579226662579	13.6160437519293	15.3694420269803	13.7205113813522
G4VC85	tr|G4VC85|G4VC85_SCHMA Putative pdz domain containing protein OS=Schistosoma mansoni GN=Smp_082740 PE=4 SV=1	1	29.125	0.299789	0.523185	1.11863	2.1714	FALSE	16.932651544873	16.4783558039835	16.8186285936994	17.0376705561315	13.3388459562242	16.497237180954
G4VC91	tr|G4VC91|G4VC91_SCHMA Putative aaa family ATPase OS=Schistosoma mansoni GN=Smp_082670 PE=4 SV=1	2	86.99	0.994338	0.00246595	-0.0115012	1.008	FALSE	17.6730848641173	16.9301905131586	16.5238460283378	17.5180628941379	19.9526978919956	13.6908642669623
G4VC92	tr|G4VC92|G4VC92_SCHMA Transcription intermediary factor 1-related OS=Schistosoma mansoni GN=Smp_082660 PE=4 SV=1	13	78.203	0.0399009	1.39902	-0.5579	1.47212	FALSE	18.810792373187	19.1307392295721	19.2451269729027	19.6432623143045	19.7216108349015	19.4954856609055
G4VC95	tr|G4VC95|G4VC95_SCHMA Farnesylated-protein converting enzyme 1 (M48 family) OS=Schistosoma mansoni GN=Smp_082620 PE=4 SV=1	15	54.93	0.0681361	1.16662	-1.09623	2.13795	FALSE	20.3684799128483	20.3750389996964	22.020716419479	21.9997131995574	22.0657126110113	21.9874980742296
G4VC97	tr|G4VC97|G4VC97_SCHMA Excision repair helicase ercc-6-related OS=Schistosoma mansoni GN=Smp_166940 PE=4 SV=1	7	147.45	0.848148	0.0715283	-0.401088	1.3205	FALSE	18.9081743992654	13.5636977394	12.4376694670795	12.8406344001179	17.33357948653	15.9385923801512
G4VC98	tr|G4VC98|G4VC98_SCHMA ADP-ribosylation factor-like 10, arl10 OS=Schistosoma mansoni GN=Smp_166930 PE=3 SV=1	6	21.227	0.0368248	1.43386	-1.04994	2.07044	FALSE	18.2219892250988	18.8529504379277	19.5546510141941	19.8512296143789	19.6896900296306	20.2384929667397
G4VCA1	tr|G4VCA1|G4VCA1_SCHMA Uncharacterized protein OS=Schistosoma mansoni GN=Smp_063760 PE=4 SV=1	3	31.213	0.19468	0.710679	0.809173	1.75221	FALSE	19.1559797472919	18.7869227525982	17.4093582343156	17.4667274601208	17.165216468244	18.292798537416
G4VCB1;G4VCB0	tr|G4VCB1|G4VCB1_SCHMA Uncharacterized protein OS=Schistosoma mansoni GN=Smp_023250.2 PE=4 SV=1;tr|G4VCB0|G4VCB0_SCHMA Uncharacterized protein OS=Schistosoma mansoni GN=Smp_023250.1 PE=4 SV=1	9	49.422	0.00662528	2.1788	2.31624	4.98033	TRUE	18.4858792264038	18.4791782169376	17.9294345163528	14.8638958070129	16.1073829451976	16.9744872350243
G4VCB3	tr|G4VCB3|G4VCB3_SCHMA Putative yip1 interacting factor homolog (Yif1 protein) OS=Schistosoma mansoni GN=Smp_023230 PE=4 SV=1	3	27.902	0.074096	1.13021	-2.72208	6.59824	FALSE	13.2980158167032	16.6934893917332	17.856985556221	18.7239777526354	19.6570650395292	17.6336890827276
G4VCB4	tr|G4VCB4|G4VCB4_SCHMA Putative radial spokehead-l OS=Schistosoma mansoni GN=Smp_134660 PE=4 SV=1	2	57.25	1.0098e-05	4.99576	-3.88269	14.7505	TRUE	13.2980158167032	13.5125371649315	13.7208770455038	17.1604967863086	17.8344801384282	17.1845357247345
G4VCB5	tr|G4VCB5|G4VCB5_SCHMA CTP synthase OS=Schistosoma mansoni GN=Smp_134650 PE=3 SV=1	12	80.846	0.00368061	2.43408	1.39879	2.6368	TRUE	18.5724302426428	18.1311995468934	18.432944485867	16.9386463579812	16.5512894199458	17.4502797474448
G4VCB9	tr|G4VCB9|G4VCB9_SCHMA Uncharacterized protein OS=Schistosoma mansoni GN=Smp_023170 PE=4 SV=1	5	44.249	0.00189202	2.72307	1.3972	2.63389	TRUE	20.4057707656888	20.0698895736992	20.2083917190792	19.0302139356425	19.0519435217508	18.4103030267827
G4VCC0	tr|G4VCC0|G4VCC0_SCHMA V-type proton ATPase subunit F OS=Schistosoma mansoni GN=Smp_023160 PE=3 SV=1	3	13.501	0.122172	0.91303	0.866878	1.82371	FALSE	19.2874701184498	18.8484488620914	17.5431167475743	17.4622193088905	17.8292206744006	17.7869607806639
G4VCC1	tr|G4VCC1|G4VCC1_SCHMA Serine/threonine-protein phosphatase OS=Schistosoma mansoni GN=Smp_023150 PE=3 SV=1	4	34.796	0.50517	0.296563	0.571681	1.48625	FALSE	18.1233964241561	18.1856311819169	16.2209968304501	18.3131321851381	16.3523914487101	16.1494585361696
G4VCD3	tr|G4VCD3|G4VCD3_SCHMA Uncharacterized protein OS=Schistosoma mansoni GN=Smp_169060 PE=4 SV=1	16	98.567	0.690217	0.161014	0.096294	1.06902	FALSE	18.4260595456363	18.8837004205712	18.9328424156985	18.5217250591355	18.8081845724007	18.6238108878508
G4VCD7	tr|G4VCD7|G4VCD7_SCHMA Dihydropteridine reductase OS=Schistosoma mansoni GN=Smp_086210 PE=4 SV=1	1	25.174	0.0568567	1.24522	-0.91286	1.88277	FALSE	16.2606142940014	17.0665494146074	16.6897372287138	18.1040028815036	16.9432142785999	17.7082638097108
G4VCE1	tr|G4VCE1|G4VCE1_SCHMA Putative aspartyl-tRNA synthetase OS=Schistosoma mansoni GN=Smp_169030 PE=4 SV=1	6	44.828	0.462373	0.335007	0.274362	1.20946	FALSE	17.9837491162073	17.451896569855	18.3926366697392	18.1487033259727	17.4660170668788	17.3904770208636
G4VCF5	tr|G4VCF5|G4VCF5_SCHMA Putative eukaryotic translation initiation factor 4e OS=Schistosoma mansoni GN=Smp_001500 PE=3 SV=1	8	24.087	0.0751309	1.12418	0.573012	1.48763	FALSE	22.3274979040699	22.138285617215	21.8665785028715	21.7102178046269	21.7636906110744	21.1394162008004
G4VCF9	tr|G4VCF9|G4VCF9_SCHMA Putative beta-arrestin 1 OS=Schistosoma mansoni GN=Smp_122900 PE=4 SV=1	5	31.717	0.000399326	3.39867	-2.39127	5.2462	TRUE	16.2456555660074	16.7887052616627	15.7207807142844	18.5001540314883	18.8981956583037	18.5306107817417
G4VCG3	tr|G4VCG3|G4VCG3_SCHMA Uncharacterized protein OS=Schistosoma mansoni GN=Smp_001590.1 PE=4 SV=1	2	26.604	0.0137727	1.86098	2.65732	6.3086	FALSE	17.0337218601444	17.0025250136007	16.4845147392914	13.2833653882194	13.3388459562242	15.9265890078321
G4VCG4	tr|G4VCG4|G4VCG4_SCHMA Acyl-CoA dehydrogenase OS=Schistosoma mansoni GN=Smp_122930 PE=4 SV=1	11	62.852	0.685688	0.163873	0.158677	1.11626	FALSE	18.41554266214	18.1651457521483	19.2201513098074	18.7484677859323	17.9757967196787	18.6005446637927
G4VCG5	tr|G4VCG5|G4VCG5_SCHMA Uncharacterized protein OS=Schistosoma mansoni GN=Smp_001610 PE=4 SV=1	5	31.186	8.61781e-07	6.0646	-6.10539	68.8503	TRUE	13.2980158167032	13.5125371649315	13.7208770455038	19.7911086219413	19.896709409929	19.1597833632091
G4VCH1	tr|G4VCH1|G4VCH1_SCHMA Uncharacterized protein OS=Schistosoma mansoni GN=Smp_122970 PE=4 SV=1	3	56.038	0.0947981	1.0232	1.06687	2.09488	FALSE	18.3481535188409	17.3317439987129	17.848163125838	17.3876723555255	15.7159885574144	17.2237898491986
G4VCI0	tr|G4VCI0|G4VCI0_SCHMA Putative centaurin alpha OS=Schistosoma mansoni GN=Smp_123030 PE=4 SV=1	7	45.686	0.000941	3.02641	-2.90293	7.47941	TRUE	15.0383344097429	14.6428183222097	16.2536911143333	18.3579764684072	18.4595557438835	17.8260868216979
G4VCJ0;O02034	tr|G4VCJ0|G4VCJ0_SCHMA Putative amidase OS=Schistosoma mansoni GN=Smp_004220 PE=4 SV=1;tr|O02034|O02034_SCHMA Amidase OS=Schistosoma mansoni PE=2 SV=1	20	67.867	0.38275	0.417085	-0.899642	1.8656	FALSE	17.8363710282153	18.4248007028782	19.5929092007076	19.2972115929323	17.9065940083767	21.3492025161032
G4VCJ4	tr|G4VCJ4|G4VCJ4_SCHMA Coatomer subunit beta OS=Schistosoma mansoni GN=Smp_124430 PE=4 SV=1	15	106.8	0.28822	0.540277	-0.353729	1.27786	FALSE	19.0836151401106	19.7340406918378	20.0607077612181	19.9585285945912	20.1286122721385	19.8524092928541
G4VCJ7	tr|G4VCJ7|G4VCJ7_SCHMA Uncharacterized protein OS=Schistosoma mansoni GN=Smp_004280 PE=4 SV=1	3	17.563	0.963294	0.0162411	-0.0149925	1.01045	FALSE	18.7070730366646	18.6587559823904	18.5297724158108	18.8485851807004	18.0427182851082	19.0492754024129
G4VCJ9	tr|G4VCJ9|G4VCJ9_SCHMA Putative dihydrolipoamide succinyltransferase component of 2-oxoglutarate dehydrogenase OS=Schistosoma mansoni GN=Smp_104330 PE=4 SV=1	10	46.491	0.490047	0.309762	-0.167547	1.12315	FALSE	21.0377889559202	20.8944726241498	21.1233882818882	21.2241242234911	21.4501225881072	20.884042650581
G4VCK0	tr|G4VCK0|G4VCK0_SCHMA Putative suppressor of ty OS=Schistosoma mansoni GN=Smp_180420 PE=4 SV=1	10	159.61	0.679134	0.168045	0.354893	1.27889	FALSE	14.5043886594015	15.0314077750639	15.0210022267901	13.1509824367739	14.0313573277272	16.3097810877227
G4VCL1	tr|G4VCL1|G4VCL1_SCHMA Mitochondrial carnitine/acylcarnitine carrier protein-related OS=Schistosoma mansoni GN=Smp_064150 PE=3 SV=1	6	32.436	0.55389	0.256576	0.516081	1.43007	FALSE	13.8632496578456	15.438333936224	15.4606060700498	13.2833653882194	13.9599085800213	15.9706717905047
G4VCL3	tr|G4VCL3|G4VCL3_SCHMA Putative sam/hd domain protein OS=Schistosoma mansoni GN=Smp_147300 PE=4 SV=1	5	62.644	0.123351	0.908857	-1.05809	2.08218	FALSE	15.933287104128	14.8047102571048	15.6574441254483	15.3689277212047	17.2266085284381	16.9741823705209
G4VCM2	tr|G4VCM2|G4VCM2_SCHMA Putative o-linked n-acetylglucosamine transferase, ogt OS=Schistosoma mansoni GN=Smp_046930 PE=4 SV=1	10	119.02	0.0501196	1.29999	-0.702136	1.62691	FALSE	16.6290016999814	16.9891153880568	17.5455123760363	17.6552381619631	17.8007980204083	17.8140001485177
G4VCM7	tr|G4VCM7|G4VCM7_SCHMA Uncharacterized protein OS=Schistosoma mansoni GN=Smp_147280 PE=4 SV=1	3	27.116	8.56167e-05	4.06744	-4.8138	28.1254	TRUE	13.2980158167032	13.5125371649315	13.7208770455038	17.3024615806796	18.5132561250762	19.1571167518364
G4VCN1;G4VCN0	tr|G4VCN1|G4VCN1_SCHMA Putative fatty acid binding protein OS=Schistosoma mansoni GN=Smp_046800.1 PE=4 SV=1;tr|G4VCN0|G4VCN0_SCHMA Putative fatty acid binding protein OS=Schistosoma mansoni GN=Smp_046800.2 PE=4 SV=1	5	15.1	0.525037	0.27981	-0.417092	1.33523	FALSE	21.25443293247	22.3437096718644	21.6456702619393	22.4307335858359	20.9550112379248	23.1093444326355
G4VCN7	tr|G4VCN7|G4VCN7_SCHMA Putative wd-repeat protein OS=Schistosoma mansoni GN=Smp_046750 PE=4 SV=1	3	27.673	0.117248	0.930895	0.725292	1.65324	FALSE	17.2836731725139	18.0922604974893	18.5794819742117	17.5621732132672	17.3236702658434	16.8936962013858
G4VCN8	tr|G4VCN8|G4VCN8_SCHMA Dihydrolipoyl dehydrogenase OS=Schistosoma mansoni GN=Smp_046740 PE=3 SV=1	19	52.868	0.263985	0.57842	0.284942	1.21836	FALSE	22.9093965746034	23.0885664127467	23.2603413680643	22.9202749207081	22.9844670989387	22.4987349007596
G4VCQ1;G4VCQ2	tr|G4VCQ1|G4VCQ1_SCHMA Uncharacterized protein OS=Schistosoma mansoni GN=Smp_103810.2 PE=4 SV=1;tr|G4VCQ2|G4VCQ2_SCHMA Uncharacterized protein OS=Schistosoma mansoni GN=Smp_103810.1 PE=4 SV=1	14	76.787	0.087778	1.05661	0.62744	1.54482	FALSE	21.1571660594268	20.6907143299916	20.7916649844818	19.7485879954929	20.6613845160417	20.3472542443137
G4VCQ5;Q9BPL0	tr|G4VCQ5|G4VCQ5_SCHMA FTZ-F1 nuclear receptor-like protein OS=Schistosoma mansoni GN=Smp_068780 PE=3 SV=1;tr|Q9BPL0|Q9BPL0_SCHMA FTZ-F1 OS=Schistosoma mansoni GN=FTZ-F1 PE=2 SV=1	4	82.977	0.0190236	1.72071	-1.36125	2.56908	FALSE	16.6208103933941	16.1353502991893	15.120559936144	17.5006394460992	17.0524940636544	17.4073422052344
G4VCQ7	tr|G4VCQ7|G4VCQ7_SCHMA Putative aldehyde dehydrogenase OS=Schistosoma mansoni GN=Smp_065060 PE=4 SV=1	18	56.327	0.505971	0.295875	-0.140544	1.10232	FALSE	22.8387160382924	22.7216704079592	22.9201087716649	23.0165074484582	23.1135218685396	22.7720982400346
G4VCQ8	tr|G4VCQ8|G4VCQ8_SCHMA Uncharacterized protein OS=Schistosoma mansoni GN=Smp_157290 PE=4 SV=1	6	102.93	0.0228129	1.64182	-2.30214	4.93189	FALSE	16.3252910503736	16.0647851211331	13.7208770455038	17.4336149728715	17.3541788429062	18.229580536599
G4VCR1	tr|G4VCR1|G4VCR1_SCHMA Putative leucine zipper-ef-hand containing transmembrane protein OS=Schistosoma mansoni GN=Smp_065110 PE=4 SV=1	24	90.046	0.986527	0.00589114	-0.00650126	1.00452	FALSE	20.8354777253094	20.5599667131197	20.954745604882	20.5421047548983	20.3035758956935	21.5240131586993
G4VCR2	tr|G4VCR2|G4VCR2_SCHMA Putative deoxyhypusine synthase OS=Schistosoma mansoni GN=Smp_065120 PE=4 SV=1	5	42.019	0.961757	0.0169345	0.0223126	1.01559	FALSE	17.7969806046016	18.7817780215543	17.640637014454	18.1015955681406	18.6136287817889	17.4372335580517
G4VCS0	tr|G4VCS0|G4VCS0_SCHMA Eh domain containing/past-1-related OS=Schistosoma mansoni GN=Smp_065180 PE=3 SV=1	18	58.078	0.0081581	2.08841	-1.01436	2.02001	TRUE	19.8324232469552	19.9504577277467	19.2263761533789	20.767219084418	20.623351698439	20.6617770027388
G4VCS1	tr|G4VCS1|G4VCS1_SCHMA Uncharacterized protein OS=Schistosoma mansoni GN=Smp_065190.2 PE=4 SV=1	3	26.351	0.0610698	1.21417	-0.638314	1.55651	FALSE	20.3963311982773	20.9534062725482	21.229404033892	21.4457878019457	21.6511522723258	21.3971444361941
G4VCT1	tr|G4VCT1|G4VCT1_SCHMA Uncharacterized protein OS=Schistosoma mansoni GN=Smp_065280 PE=4 SV=1	2	12.723	0.300566	0.522061	0.230757	1.17345	FALSE	20.8467666463701	20.9692115611682	20.5925617168535	20.4561668148613	20.6761069377936	20.5839946745143
G4VCT7	tr|G4VCT7|G4VCT7_SCHMA Family M13 unassigned peptidase (M13 family) OS=Schistosoma mansoni GN=Smp_157400 PE=4 SV=1	4	27.047	0.326565	0.48603	-0.355392	1.27933	FALSE	18.1945200310527	17.2691038015315	17.2465706255887	17.9207924105729	18.1605254361982	17.6950514233278
G4VCT8	tr|G4VCT8|G4VCT8_SCHMA Uncharacterized protein OS=Schistosoma mansoni GN=Smp_157410 PE=4 SV=1	102	529.79	0.287457	0.541427	-1.37714	2.59752	FALSE	14.9848814312012	16.8582577577633	17.9724449688556	18.4768921463923	15.8938091184361	19.5762946067667
G4VCU3	tr|G4VCU3|G4VCU3_SCHMA Uncharacterized protein OS=Schistosoma mansoni GN=Smp_065420 PE=4 SV=1	5	32.743	0.143091	0.844388	-0.654232	1.57378	FALSE	19.2506786749981	18.8943584484941	18.0121330870395	19.5831935945727	19.5452153657553	18.9914576396581
G4VCV7	tr|G4VCV7|G4VCV7_SCHMA Protein arginine N-methyltransferase OS=Schistosoma mansoni GN=Smp_171150 PE=3 SV=1	6	71.348	0.166062	0.779729	0.372629	1.29471	FALSE	17.8672292260594	18.3057089298226	18.286646451398	17.6306645460934	18.0339913278527	17.6770416421438
G4VCV8	tr|G4VCV8|G4VCV8_SCHMA Putative sin3b OS=Schistosoma mansoni GN=Smp_171160 PE=4 SV=1	4	158.61	0.952889	0.0209577	-0.0368632	1.02588	FALSE	14.1632289089806	15.7782740453952	15.0520666299594	15.1533959676944	14.108357610333	15.8424056217209
G4VCV9	tr|G4VCV9|G4VCV9_SCHMA Putative dead box ATP-dependent RNA helicase OS=Schistosoma mansoni GN=Smp_171170 PE=4 SV=1	7	125.19	0.281321	0.550798	-0.82177	1.76757	FALSE	14.34656390682	15.3263036216893	16.2864631385481	16.3926038080827	15.039600430671	16.9924364271356
G4VCW4	tr|G4VCW4|G4VCW4_SCHMA Putative fad oxidoreductase OS=Schistosoma mansoni GN=Smp_089880 PE=4 SV=1	4	54.604	0.553307	0.257034	-0.821337	1.76704	FALSE	13.2980158167032	17.7901174114058	18.0677916032406	17.4457062474659	17.2823061341042	16.8919219661072
G4VCW9	tr|G4VCW9|G4VCW9_SCHMA Putative dna repair/transcription protein met18/mms19 (Fragment) OS=Schistosoma mansoni GN=Smp_171230 PE=4 SV=1	7	124.63	0.00744156	2.12834	1.96898	3.91492	TRUE	15.4872227092285	16.9879387692371	17.023864062707	14.1857173657315	14.9155188625523	14.4908364864303
G4VCX2	tr|G4VCX2|G4VCX2_SCHMA Putative thyroid hormone receptor interactor OS=Schistosoma mansoni GN=Smp_171260 PE=4 SV=1	10	162.83	0.271107	0.566859	-0.270304	1.20606	FALSE	17.0008589070277	17.500112947474	17.3491969436341	17.603486806021	17.6591992844471	17.3983947037781
G4VCY0	tr|G4VCY0|G4VCY0_SCHMA Strictosidine synthase-related OS=Schistosoma mansoni GN=Smp_161220 PE=4 SV=1	2	41.734	0.0149707	1.82476	-3.04074	8.22912	FALSE	13.2980158167032	16.3928606420783	16.2593529696783	18.0094570952639	18.1637394189478	18.8992467369799
G4VCY4	tr|G4VCY4|G4VCY4_SCHMA 6-phosphogluconate dehydrogenase, decarboxylating OS=Schistosoma mansoni GN=Smp_071840 PE=3 SV=1	15	41.761	0.00841228	2.07509	0.779706	1.71678	FALSE	22.6477281221726	22.8743349427569	22.8563633712308	22.1491814730808	22.0554496323176	21.83467657326
G4VCZ0	tr|G4VCZ0|G4VCZ0_SCHMA Uncharacterized protein OS=Schistosoma mansoni GN=Smp_161170 PE=4 SV=1	3	81.074	0.691733	0.160062	0.407502	1.32639	FALSE	16.8053013273008	14.4952427309957	15.3623667475263	15.6129411580584	13.3388459562242	16.4886183333034
G4VD00	tr|G4VD00|G4VD00_SCHMA Ubiquitin-specific peptidase 2 (C19 family) OS=Schistosoma mansoni GN=Smp_212390 PE=3 SV=1	2	64.446	4.47824e-05	4.34889	-2.49085	5.62111	TRUE	13.2980158167032	13.5125371649315	13.7208770455038	15.761445309789	16.035395649365	16.2071528561515
[truncated: 1,363 more rows]
