# Supplementary material for: Evolution of gene dosage on the Z-chromosome of schistosome parasites
Source: eLife. 2018 Jul 25;7:e35684. doi: 10.7554/eLife.35684 (PMC6089595; doi:10.7554/eLife.35684)
Supplement: Figure 4—source data 2. [file elife-35684-fig4-data2.xlsx]

## Sheet: Figure 4-source data 2
Figure 4-source data 2: Proteomic data with imputed values - HEADS
Majority protein IDs	Fasta headers	Razor + unique peptides	Mol. Weight [kDa]	P-Value	(-)log10(P-Value)	logFC	Enrichment	Significant	log2(iBAQ FH-3)	log2(iBAQ FH-4)	log2(iBAQ FH-6_2)	log2(iBAQ MH-8)	log2(iBAQ MH-9)	log2(iBAQ MH-10)
A0A0E3T038;G4VDY5	tr|A0A0E3T038|A0A0E3T038_SCHMA Integrin OS=Schistosoma mansoni GN=alpha-Int4 PE=2 SV=1;tr|G4VDY5|G4VDY5_SCHMA Uncharacterized protein OS=Schistosoma mansoni GN=Smp_173540 PE=3 SV=1	21	167.44	0.118936	0.924687	-0.420357	1.33826	FALSE	19.8785356572095	19.3330098989444	19.3395080452835	19.9379383792891	19.7154146599078	20.1587716037814
A0A0E3X5A0;E7BBC3;G4VIL6	tr|A0A0E3X5A0|A0A0E3X5A0_SCHMA Integrin OS=Schistosoma mansoni GN=alpha-Int3opt PE=2 SV=1;tr|E7BBC3|E7BBC3_SCHMA Alpha integrin receptor 3 OS=Schistosoma mansoni GN=alpha-Int3 PE=2 SV=1;tr|G4VIL6|G4VIL6_SCHMA Putative integrin alpha-ps OS=Schistosoma manso	19	137.62	0.870887	0.0600382	0.0704544	1.05005	FALSE	19.8352724713431	19.7842682345533	18.4810431270435	19.5766080330136	18.9732806096394	19.3393319968028
A0A0R5RJC3;P12812	tr|A0A0R5RJC3|A0A0R5RJC3_SCHMA Hsp20 (Fragment) OS=Schistosoma mansoni PE=2 SV=1;sp|P12812|P40_SCHMA Major egg antigen OS=Schistosoma mansoni PE=2 SV=1	1	39.434	0.000860883	3.06506	-3.27356	9.67026	TRUE	16.2599858949467	14.5011210631332	14.4707619788912	18.5996616593282	17.933619828415	18.5192535933731
A0A0R5RJE0;A0A146MG63;G4V9Z0;O96413;G4VCP4;Q6RYS0	tr|A0A0R5RJE0|A0A0R5RJE0_SCHMA Ubiquitin (Fragment) OS=Schistosoma mansoni PE=2 SV=1;tr|A0A146MG63|A0A146MG63_SCHMA Uncharacterized protein OS=Schistosoma mansoni GN=c12516_g1_i1 PE=4 SV=1;tr|G4V9Z0|G4V9Z0_SCHMA Putative ubiquitin (Ribosomal protein L40) O	8	17.111	0.145544	0.837007	0.247146	1.18686	FALSE	26.1266187278467	26.0637195940714	25.9972733388001	25.8166646241383	25.8507333582999	25.778776350074
A0A146MG43	tr|A0A146MG43|A0A146MG43_SCHMA Uncharacterized protein OS=Schistosoma mansoni GN=c18731_g1_i1 PE=4 SV=1	3	9.6581	0.00706291	2.15102	-1.00777	2.0108	TRUE	22.3312507680254	21.6081046962664	21.9106366650976	22.6918576242038	23.1662218696287	23.0152232155007
A0A146MG53	tr|A0A146MG53|A0A146MG53_SCHMA Uncharacterized protein OS=Schistosoma mansoni GN=c15790_g1_i1 PE=4 SV=1	3	18.836	1.60073e-05	4.79568	-5.47826	44.578	TRUE	14.2283307302282	14.5011210631332	15.7718251915688	20.0720150244706	20.2298076586282	20.6342333322377
A0A146MG57	tr|A0A146MG57|A0A146MG57_SCHMA Uncharacterized protein OS=Schistosoma mansoni GN=c12741_g1_i1 PE=4 SV=1	2	9.8203	0.796301	0.0989228	0.0471231	1.0332	FALSE	25.1772600861393	24.8502220930414	24.8015522033613	24.9537971714885	24.8735721147575	24.8602958803462
A0A146MG80	tr|A0A146MG80|A0A146MG80_SCHMA Uncharacterized protein OS=Schistosoma mansoni GN=c8380_g1_i4 PE=4 SV=1	5	5.1138	0.740573	0.130432	0.0574633	1.04063	FALSE	22.0978925675849	22.2504969705894	22.3840622950645	22.1446284310724	22.1136279568132	22.3018055909862
A0A146MG93	tr|A0A146MG93|A0A146MG93_SCHMA Uncharacterized protein OS=Schistosoma mansoni GN=c8194_g1_i1 PE=4 SV=1	2	6.815	0.000161284	3.79241	1.95483	3.87671	TRUE	24.2739397081051	23.9517512488315	23.7616206534183	22.2685575408554	22.1433030135581	21.7109576794371
A0A146MG97	tr|A0A146MG97|A0A146MG97_SCHMA Uncharacterized protein OS=Schistosoma mansoni GN=c7392_g1_i1 PE=4 SV=1	3	46.504	0.0821748	1.08526	-1.04073	2.05727	FALSE	15.4158812820208	17.209218320347	16.0473556748065	16.7571735842789	17.4591222213705	17.5783556894406
A0A146MGA0	tr|A0A146MGA0|A0A146MGA0_SCHMA Uncharacterized protein OS=Schistosoma mansoni GN=c7489_g1_i1 PE=4 SV=1	6	39.502	0.0128976	1.88949	0.8381	1.78769	FALSE	20.2817632248255	19.905258570621	19.7071708734135	19.1242575409205	19.410177542882	18.8454567891197
A0A146MGA3	tr|A0A146MGA3|A0A146MGA3_SCHMA Uncharacterized protein OS=Schistosoma mansoni GN=c7743_g1_i1 PE=4 SV=1	2	6.2422	8.92844e-05	4.04922	1.71385	3.28035	TRUE	25.3819019218478	25.1011759886012	24.9965156027095	23.5808552048265	23.4608720033205	23.2963209208321
A0A146MGA5	tr|A0A146MGA5|A0A146MGA5_SCHMA Uncharacterized protein OS=Schistosoma mansoni GN=c6969_g1_i1 PE=4 SV=1	7	42.552	0.00115651	2.93685	-1.09452	2.13542	TRUE	19.4302787005362	19.8170985749635	19.4686771541325	20.8023781060004	20.6864638395373	20.5107693960003
A0A146MGB5	tr|A0A146MGB5|A0A146MGB5_SCHMA Uncharacterized protein OS=Schistosoma mansoni GN=c6438_g1_i1 PE=4 SV=1	4	26.576	0.00452192	2.34468	-1.10908	2.15708	TRUE	18.0257065219701	17.5617992979667	18.1422597536155	19.273954216811	18.6734885021681	19.109563205809
A0A146MGC1	tr|A0A146MGC1|A0A146MGC1_SCHMA Uncharacterized protein OS=Schistosoma mansoni GN=c6749_g1_i1 PE=4 SV=1	2	13.994	0.48438	0.314814	0.493231	1.40759	FALSE	20.3791510531046	19.195302368651	21.1175346996228	20.7308570091375	18.8017006638107	19.6797380899768
A0A146MGC6	tr|A0A146MGC6|A0A146MGC6_SCHMA Uncharacterized protein OS=Schistosoma mansoni GN=c6091_g2_i1 PE=4 SV=1	2	6.8459	0.0867889	1.06154	-1.1987	2.29533	FALSE	21.4993500277024	21.4571278362102	19.73834032619	22.5995272530078	21.3477700483506	22.3436192496925
A0A146MGD5	tr|A0A146MGD5|A0A146MGD5_SCHMA Uncharacterized protein OS=Schistosoma mansoni GN=c5016_g1_i1 PE=3 SV=1	2	7.6928	0.614137	0.211735	-0.134726	1.09788	FALSE	23.0225395468368	22.9841911774603	22.5879527026914	23.2862017665686	23.1324111233403	22.5802488050719
A0A146MGD6	tr|A0A146MGD6|A0A146MGD6_SCHMA Uncharacterized protein OS=Schistosoma mansoni GN=c5482_g1_i1 PE=4 SV=1	1	14.04	0.269431	0.569552	-0.322665	1.25064	FALSE	18.9227093201957	18.42406811735	18.0585621615408	18.7943464955387	18.9760175489959	18.6029707621613
A0A146MGE6	tr|A0A146MGE6|A0A146MGE6_SCHMA Uncharacterized protein OS=Schistosoma mansoni GN=c4298_g1_i1 PE=4 SV=1	1	7.6088	0.0117343	1.93054	-0.750475	1.68235	FALSE	21.74353010197	22.0601346931689	21.41389391049	22.4946612465528	22.4638485952507	22.51047335937
A0A146MGF3	tr|A0A146MGF3|A0A146MGF3_SCHMA Uncharacterized protein OS=Schistosoma mansoni GN=c4561_g1_i1 PE=4 SV=1	1	17.239	0.514335	0.288754	-0.181907	1.13438	FALSE	17.5160246477796	18.407771327251	18.1310553349253	18.2017108498246	18.1076876262312	18.2911738233093
A0A146MGG9	tr|A0A146MGG9|A0A146MGG9_SCHMA Uncharacterized protein OS=Schistosoma mansoni GN=c2964_g1_i1 PE=4 SV=1	1	10.738	0.240504	0.618878	0.63889	1.55713	FALSE	18.4603859099126	19.6419075181076	19.5195239102624	19.038018485901	17.7019710304584	18.9651590316433
A0A146MGH8	tr|A0A146MGH8|A0A146MGH8_SCHMA Malic enzyme OS=Schistosoma mansoni GN=c1504_g1_i1 PE=3 SV=1	8	47.963	0.064039	1.19356	-0.574345	1.489	FALSE	20.2109163958084	19.8831738116731	20.5238955310515	20.7697011451677	20.4810987313938	21.0902222509371
A0A146MGS0	tr|A0A146MGS0|A0A146MGS0_SCHMA Uncharacterized protein OS=Schistosoma mansoni GN=c6943_g1_i1 PE=3 SV=1	2	14.295	0.0613859	1.21193	-1.52563	2.87912	FALSE	15.5598047988829	17.9785096424979	17.8227876494068	18.8364714079791	18.7099174218897	18.3916038343986
A0A146MGV3	tr|A0A146MGV3|A0A146MGV3_SCHMA Uncharacterized protein OS=Schistosoma mansoni GN=c4946_g1_i1 PE=4 SV=1	1	12.328	0.192386	0.715826	-1.43358	2.70117	FALSE	18.3282991933355	17.5291160726559	14.4707619788912	18.0943642077763	18.1058895017264	18.4286740047834
A0A146MGW2	tr|A0A146MGW2|A0A146MGW2_SCHMA Uncharacterized protein OS=Schistosoma mansoni GN=c3968_g1_i1 PE=4 SV=1	1	40.364	0.969002	0.0136754	0.0112254	1.00781	FALSE	15.9101426369842	16.6517249425406	16.6938051211821	16.1300695412547	16.5391043348294	16.5528227494003
A0A146MHE5;G4VRK0	tr|A0A146MHE5|A0A146MHE5_SCHMA Protein yippee-like OS=Schistosoma mansoni GN=c18726_g1_i1 PE=3 SV=1;tr|G4VRK0|G4VRK0_SCHMA Putative yippee protein OS=Schistosoma mansoni GN=Smp_171850 PE=4 SV=1	1	13.848	0.165291	0.781751	-1.77166	3.41446	FALSE	18.2835686481096	18.7708931254553	14.4707619788912	19.0114250447561	18.891504781941	18.9372621263474
A0A146MHL9	tr|A0A146MHL9|A0A146MHL9_SCHMA Uncharacterized protein OS=Schistosoma mansoni GN=c7454_g2_i1 PE=4 SV=1	3	8.4437	0.035851	1.4455	0.418217	1.33628	FALSE	24.7893058723366	24.6708295303127	24.741698571714	24.2025315033576	24.4204393477615	24.3242120040345
A0A146MHS2	tr|A0A146MHS2|A0A146MHS2_SCHMA Uncharacterized protein OS=Schistosoma mansoni GN=c4297_g1_i1 PE=3 SV=1	3	14.625	0.0300474	1.52219	-0.82593	1.77268	FALSE	20.3266836332105	21.1969701911319	21.2307070550157	21.9242752544001	21.7058837507788	21.6019929952375
A0A146MHV0;A0A146MGH5	tr|A0A146MHV0|A0A146MHV0_SCHMA MICOS complex subunit MIC10 OS=Schistosoma mansoni GN=c797_g1_i1 PE=3 SV=1;tr|A0A146MGH5|A0A146MGH5_SCHMA MICOS complex subunit MIC10 OS=Schistosoma mansoni GN=c797_g1_i2 PE=3 SV=1	6	9.8944	0.00597047	2.22399	-0.750536	1.68242	FALSE	23.0083152240355	22.6393189655538	22.6427030618683	23.6171310714787	23.4850910552242	23.4397237716452
A0A146MHY2	tr|A0A146MHY2|A0A146MHY2_SCHMA Uncharacterized protein OS=Schistosoma mansoni GN=c19920_g1_i1 PE=4 SV=1	1	17.11	0.348701	0.457547	-1.14872	2.21717	FALSE	14.2283307302282	17.8390319552446	18.6986127093022	18.0145871542096	18.0072852795725	18.1902614319689
A0A146MI59;A0A146MJ85	tr|A0A146MI59|A0A146MI59_SCHMA Uncharacterized protein OS=Schistosoma mansoni GN=c7360_g1_i1 PE=4 SV=1;tr|A0A146MJ85|A0A146MJ85_SCHMA Uncharacterized protein OS=Schistosoma mansoni GN=c7360_g1_i2 PE=4 SV=1	5	35.707	0.0831422	1.08018	0.506384	1.42049	FALSE	20.0151576176392	20.318051657121	20.2169577303853	19.5609320076952	19.3606034392073	20.1094798094166
A0A146MI72	tr|A0A146MI72|A0A146MI72_SCHMA Uncharacterized protein OS=Schistosoma mansoni GN=c18052_g1_i1 PE=4 SV=1	3	9.4979	0.000739487	3.13107	-1.79705	3.47509	TRUE	17.6579747374696	17.8215418335157	18.4557766654247	20.1196566339421	19.5438529335224	19.6629303508133
A0A146MID7	tr|A0A146MID7|A0A146MID7_SCHMA Uncharacterized protein OS=Schistosoma mansoni GN=c7393_g1_i1 PE=4 SV=1	4	30.885	0.122943	0.910296	-0.909869	1.87887	FALSE	21.110954942155	21.1838343508491	19.4012803567235	21.239507157626	21.6268893879737	21.5592790036905
A0A146MJ29	tr|A0A146MJ29|A0A146MJ29_SCHMA Uncharacterized protein OS=Schistosoma mansoni GN=c5980_g1_i1 PE=4 SV=1	3	26.937	0.0578989	1.23733	0.491457	1.40586	FALSE	20.2212183741807	20.0871029110725	19.7085893203107	19.444534116957	19.3729291608203	19.7250765569026
A0A146MJ48;A0A146MII8	tr|A0A146MJ48|A0A146MJ48_SCHMA Uncharacterized protein OS=Schistosoma mansoni GN=c3996_g1_i2 PE=4 SV=1;tr|A0A146MII8|A0A146MII8_SCHMA Uncharacterized protein OS=Schistosoma mansoni GN=c3996_g1_i1 PE=4 SV=1	1	8.643	0.00935439	2.02898	-4.58334	23.9731	TRUE	18.8245013120898	14.5011210631332	14.4707619788912	20.7353496403769	19.9219146718638	20.8891535032301
A0A146MJ81	tr|A0A146MJ81|A0A146MJ81_SCHMA Uncharacterized protein OS=Schistosoma mansoni GN=c325_g1_i1 PE=3 SV=1	1	6.7836	0.289801	0.537901	1.45742	2.74618	FALSE	19.629665021497	18.6905032179566	18.5679273998378	19.0886297383215	18.8950665289812	14.5321256808221
A0A146MJC6	tr|A0A146MJC6|A0A146MJC6_SCHMA Uncharacterized protein OS=Schistosoma mansoni GN=c4805_g2_i1 PE=4 SV=1	4	19.71	8.27799e-07	6.08208	-4.24048	18.9021	TRUE	16.0405218126107	15.9004803802363	16.4535339431063	20.2506770196853	20.4158732761271	20.4494134660825
A0A146MJD6	tr|A0A146MJD6|A0A146MJD6_SCHMA Uncharacterized protein OS=Schistosoma mansoni GN=c3893_g1_i1 PE=4 SV=1	3	8.95	0.110872	0.955177	-1.77428	3.42068	FALSE	19.7843098864939	20.0765197590402	19.5011372497374	22.6995855474813	19.2912913318705	22.693938354361
A0A1C9A1I5;A0A1C9A1I3;A0A1C9A1J0	tr|A0A1C9A1I5|A0A1C9A1I5_SCHMA MEG-14 isoform 6 OS=Schistosoma mansoni PE=2 SV=1;tr|A0A1C9A1I3|A0A1C9A1I3_SCHMA MEG-14 isoform 4 OS=Schistosoma mansoni PE=2 SV=1;tr|A0A1C9A1J0|A0A1C9A1J0_SCHMA MEG-14 isoform 7 OS=Schistosoma mansoni PE=2 SV=1	2	13.821	0.00709717	2.14891	-2.92992	7.62067	TRUE	14.2283307302282	16.6293930383356	16.9704866855059	19.1809907870193	18.7457378078721	18.691234843274
A7UAX6;G4LYG5;A7UAX7	tr|A7UAX6|A7UAX6_SCHMA Ornithine aminotransferase OS=Schistosoma mansoni PE=2 SV=1;tr|G4LYG5|G4LYG5_SCHMA Ornithine--oxo-acid transaminase OS=Schistosoma mansoni GN=Smp_000660 PE=3 SV=1;tr|A7UAX7|A7UAX7_SCHMA Ornithine aminotransferase OS=Schistosoma manso	21	48.65	0.00447048	2.34965	-0.66223	1.58253	FALSE	25.3861833693391	25.4884390290677	25.4365537931842	26.0717072150796	26.0439812001634	26.1821775108769
B2CNV1;G4LXX8	tr|B2CNV1|B2CNV1_SCHMA Stomatin-like protein 2 OS=Schistosoma mansoni GN=StoLP-2 PE=2 SV=1;tr|G4LXX8|G4LXX8_SCHMA SPFH domain / Band 7 family protein, putative OS=Schistosoma mansoni GN=Smp_072640 PE=4 SV=1	8	39.525	0.0488169	1.31143	-0.572134	1.48672	FALSE	21.0437786687308	20.7748262784278	21.0157622254606	21.1180545727378	21.8047982802549	21.6279154267613
B2D1S3;C4QCZ2;G4VK32	tr|B2D1S3|B2D1S3_SCHMA Nucleotide pyrophosphatase/phosphodiesterase 5 OS=Schistosoma mansoni GN=NPP-5a PE=2 SV=1;tr|C4QCZ2|C4QCZ2_SCHMA Ecto-phosphodiesterase OS=Schistosoma mansoni GN=PDE PE=2 SV=1;tr|G4VK32|G4VK32_SCHMA Putative ectonucleotide pyrophosph	6	51.433	0.0258203	1.58804	0.638469	1.55668	FALSE	20.376442376253	20.3866845142305	19.788713590177	19.5285889693146	19.5250817679625	19.5827628434757
B4XC67	tr|B4XC67|B4XC67_SCHMA Cathepsin L3 OS=Schistosoma mansoni GN=CL3 PE=2 SV=1	6	41.18	0.0160286	1.7951	-0.871557	1.82964	FALSE	18.4117726506826	18.889376048263	19.0816377285923	19.6702365753645	19.3515688379557	19.9756515724413
B8Y6H3	tr|B8Y6H3|B8Y6H3_SCHMA DIF_5 OS=Schistosoma mansoni GN=Smp_105220 PE=2 SV=1	6	14.191	0.140101	0.853559	0.315654	1.24458	FALSE	25.4866209081977	25.5263868662959	25.1158779643723	24.9406489131285	25.1304547183159	25.1108213849349
C0L926;G4VMQ7	tr|C0L926|C0L926_SCHMA Peptidyl-alpha-hydroxyglycine alpha-amidating lyase OS=Schistosoma mansoni PE=2 SV=1;tr|G4VMQ7|G4VMQ7_SCHMA Putative peptidyl-glycine alpha-amidating monooxygenase OS=Schistosoma mansoni GN=Smp_010820 PE=4 SV=1	4	48.083	0.454565	0.342404	0.193527	1.14356	FALSE	19.4827826867406	18.89101127345	19.1418610905887	18.6895811382993	19.2630188236557	18.982475428067
C1LZ83	tr|C1LZ83|C1LZ83_SCHMA Proteasome activator PA28-gamma OS=Schistosoma mansoni GN=PA28-gamma PE=2 SV=1	5	28.688	0.979131	0.00915921	-0.00681725	1.00474	FALSE	20.0275032396935	20.3615205906764	19.7870489157352	19.7018828330636	20.1728571606777	20.3217845104818
C1LZY9	tr|C1LZY9|C1LZY9_SCHMA Serine/threonine-protein phosphatase OS=Schistosoma mansoni GN=Smp_165490 PE=3 SV=2	12	35.756	0.26036	0.584426	-0.256131	1.19427	FALSE	22.0895812913625	22.1390266698508	22.6316245728116	22.4974891764301	22.4837935594719	22.6473433400771
C1M000	tr|C1M000|C1M000_SCHMA Ebna2 binding protein P100, putative OS=Schistosoma mansoni GN=Smp_081570 PE=4 SV=1	7	58.268	0.151128	0.820655	-1.05359	2.07569	FALSE	19.7187230656445	18.5647422095945	17.1541687044512	19.857886989983	19.2350268581088	19.5054868784926
C1M001;C4QTD7	tr|C1M001|C1M001_SCHMA Ebna2 binding protein P100, putative OS=Schistosoma mansoni GN=Smp_166110 PE=4 SV=1;tr|C4QTD7|C4QTD7_SCHMA Uncharacterized protein OS=Schistosoma mansoni GN=Smp_118190 PE=4 SV=2	7	42.178	0.31313	0.504275	-0.479013	1.39379	FALSE	20.1402472837203	19.49719311271	18.7153570851814	20.4849924826035	19.5246331803785	19.7802096062181
C1M0Q4	tr|C1M0Q4|C1M0Q4_SCHMA Speckle-type poz protein, putative OS=Schistosoma mansoni GN=Smp_175960 PE=4 SV=2	3	23.415	0.10304	0.986996	0.924718	1.89831	FALSE	18.2397931764314	19.5252757109182	19.502380006084	17.6964260316292	17.9083954568415	18.8884732273524
C1M169	tr|C1M169|C1M169_SCHMA GDP-4-keto-6-deoxy-D-mannose-3, 5-epimerase-4-reductase OS=Schistosoma mansoni GN=GMER PE=2 SV=1	11	35.916	0.00679731	2.16766	-0.910361	1.87952	FALSE	20.1921853981478	20.5904367139642	20.0268157531424	21.2340700166474	21.3736350615855	20.9328150611568
C4PXA6	tr|C4PXA6|C4PXA6_SCHMA Thymidylate kinase OS=Schistosoma mansoni GN=Smp_001360 PE=4 SV=1	12	25.485	0.142769	0.845366	-0.278677	1.21308	FALSE	23.2693186017815	23.4810896407911	23.2083529103161	23.608599519895	23.6902604625217	23.4959325191384
C4PY08	tr|C4PY08|C4PY08_SCHMA Putative sodium/potassium-dependent atpase beta subunit OS=Schistosoma mansoni GN=Smp_124240 PE=2 SV=1	10	32.92	0.882981	0.0540488	0.0301481	1.02112	FALSE	24.2252433876421	24.1276132995683	23.7611881260455	23.8439723465376	24.069653218778	24.1099749048469
C4PY91	tr|C4PY91|C4PY91_SCHMA Rab-2,4,14, putative OS=Schistosoma mansoni GN=Smp_004910 PE=4 SV=1	7	24.767	0.409491	0.387755	0.137279	1.09983	FALSE	20.7295464185432	20.8863139074837	20.6815985699871	20.6896758444118	20.5691961028474	20.6267504950475
C4PZS5;C4PZS6	tr|C4PZS5|C4PZS5_SCHMA 60S acidic ribosomal protein P0 OS=Schistosoma mansoni GN=Smp_009690.1 PE=3 SV=1;tr|C4PZS6|C4PZS6_SCHMA 60S acidic ribosomal protein P0 OS=Schistosoma mansoni GN=Smp_009690.2 PE=3 SV=1	11	35.029	0.311161	0.507015	-0.36611	1.28887	FALSE	21.8971677299159	21.405397910987	22.4858678477801	22.6615985378583	22.190020482279	22.0351444965799
C4Q0P6	sp|C4Q0P6|LIS1_SCHMA Lissencephaly-1 homolog OS=Schistosoma mansoni GN=Smp_129340 PE=3 SV=1	9	47.106	0.0459894	1.33734	0.493606	1.40796	FALSE	19.9389557250159	20.2363742734465	20.4375286237606	19.8522573195685	19.6951604201155	19.5846239402983
C4Q195	tr|C4Q195|C4Q195_SCHMA Uncharacterized protein (Fragment) OS=Schistosoma mansoni GN=Smp_130400 PE=4 SV=2	1	21.566	0.649044	0.187726	-0.641121	1.55954	FALSE	19.5789954021875	19.0493670196732	14.4707619788912	18.6268439798511	18.2006191911006	18.1950244299773
C4Q2F2;C4Q2F3	tr|C4Q2F2|C4Q2F2_SCHMA Calcyphosine/tpp, putative OS=Schistosoma mansoni GN=Smp_019640.1 PE=4 SV=1;tr|C4Q2F3|C4Q2F3_SCHMA Calcyphosine/tpp, putative OS=Schistosoma mansoni GN=Smp_019640.2 PE=4 SV=1	7	23.776	0.398694	0.39936	0.180834	1.13354	FALSE	22.2270036252048	22.0781121895298	22.1725005272234	21.7320070251736	22.2861673554733	21.9169389762115
C4Q2F6	tr|C4Q2F6|C4Q2F6_SCHMA Splicing factor u2af large subunit, putative OS=Schistosoma mansoni GN=Smp_019690 PE=4 SV=1	2	57.958	0.30716	0.512635	0.344323	1.26956	FALSE	14.7131519802925	14.5011210631332	15.270908806686	14.772722238902	14.0021924318601	14.6772983032114
C4Q2F8;C4Q2F9	tr|C4Q2F8|C4Q2F8_SCHMA Uncharacterized protein OS=Schistosoma mansoni GN=Smp_019730.1 PE=4 SV=1;tr|C4Q2F9|C4Q2F9_SCHMA Uncharacterized protein OS=Schistosoma mansoni GN=Smp_019730.2 PE=4 SV=1	4	13.076	0.87299	0.0589905	0.268713	1.20473	FALSE	19.4477041952898	18.5199554917423	15.6440615013777	18.0027102768423	20.1388217858579	14.6640494082635
C4Q2I8	tr|C4Q2I8|C4Q2I8_SCHMA Aminoacylase (M20 family) OS=Schistosoma mansoni GN=Smp_019630 PE=4 SV=2	12	48.957	1.82455e-05	4.73884	-2.4171	5.34097	TRUE	18.7276092990142	19.2536366179196	19.1645940423038	21.4982103136339	21.4900779410436	21.4088609030326
C4Q309;C4Q308	tr|C4Q309|C4Q309_SCHMA Uncharacterized protein OS=Schistosoma mansoni GN=Smp_021730.1 PE=4 SV=1;tr|C4Q308|C4Q308_SCHMA Uncharacterized protein OS=Schistosoma mansoni GN=Smp_021730.3 PE=4 SV=1	1	25.227	0.0322816	1.49104	-1.43045	2.69531	FALSE	16.0665666889884	16.4212072940118	14.4707619788912	16.9204513847086	17.1684848835729	17.1609460963975
C4Q310	tr|C4Q310|C4Q310_SCHMA Uncharacterized protein OS=Schistosoma mansoni GN=Smp_021730.2 PE=4 SV=1	7	25.128	0.288716	0.539529	-0.231966	1.17443	FALSE	23.2735466884621	23.2871353418418	22.9530272759208	23.1459903781072	23.5502443585649	23.5133719023145
C4Q3U7	tr|C4Q3U7|C4Q3U7_SCHMA Protein FAM82B, putative OS=Schistosoma mansoni GN=Smp_024810 PE=4 SV=1	2	21.411	0.0124285	1.90558	3.23917	9.44249	FALSE	20.0855734805371	19.7207620404316	20.1140838409981	17.8615532121097	17.8092404432349	14.5321256808221
C4Q3U8	tr|C4Q3U8|C4Q3U8_SCHMA Tetraspanin OS=Schistosoma mansoni GN=Smp_024820.2 PE=3 SV=1	5	25.177	0.0390335	1.40856	0.672363	1.59368	FALSE	22.1430548291353	21.5395566669567	21.5795628551355	20.759010025574	21.1521936758657	21.3338813380096
C4Q4J8	tr|C4Q4J8|C4Q4J8_SCHMA Phosphatidylinositol transfer protein (Fragment) OS=Schistosoma mansoni GN=Smp_136800 PE=4 SV=2	2	35.473	0.214518	0.668535	1.27214	2.41519	FALSE	17.9939952036602	18.2056233501262	17.8198000835413	17.8187029902348	17.8521809654519	14.5321256808221
C4Q4Q6	tr|C4Q4Q6|C4Q4Q6_SCHMA 40S ribosomal protein S3, putative OS=Schistosoma mansoni GN=Smp_027610 PE=3 SV=1	12	25.457	0.550286	0.259411	0.323255	1.25115	FALSE	21.4616643282868	20.6399004736121	22.2379992325362	21.8397230478589	20.5307146068594	20.9993614250108
C4Q4S4	tr|C4Q4S4|C4Q4S4_SCHMA Synembryn, putative OS=Schistosoma mansoni GN=Smp_027910 PE=4 SV=1	3	60.068	0.467598	0.330128	0.908607	1.87723	FALSE	16.9087995463964	13.7036218951203	17.5991235026021	16.6807144195708	14.2728824249109	14.5321256808221
C4Q4V9	tr|C4Q4V9|C4Q4V9_SCHMA Uncharacterized protein OS=Schistosoma mansoni GN=Smp_027870 PE=4 SV=2	5	160.46	0.174651	0.757829	-0.697917	1.62216	FALSE	14.6217782614233	14.5011210631332	16.1307660706127	15.7316115230832	15.755774543663	15.8600294643939
C4Q4W0	tr|C4Q4W0|C4Q4W0_SCHMA Uncharacterized protein OS=Schistosoma mansoni GN=Smp_027880 PE=4 SV=1	3	14.586	0.628834	0.201464	-0.275725	1.2106	FALSE	20.4677341178574	20.3468306428697	18.5856240936363	20.1266690993406	20.3840793031017	19.7166149781544
C4Q500	tr|C4Q500|C4Q500_SCHMA Caspase-3 OS=Schistosoma mansoni PE=2 SV=1	8	33.108	0.0293868	1.53185	-0.688266	1.61135	FALSE	20.2065309308532	19.9898836008011	20.742991495836	21.1573536237915	20.8887478079286	20.9581020714391
C4Q5J0	tr|C4Q5J0|C4Q5J0_SCHMA Camp-dependent protein kinase type I-beta regulatory subunit, putative OS=Schistosoma mansoni GN=Smp_030400 PE=4 SV=2	6	44.456	0.00137334	2.86222	-2.62751	6.1796	TRUE	14.8555934268581	15.2239832203115	16.5585350637626	18.1933338205008	18.4577521962671	17.8695649571609
C4Q5J1	tr|C4Q5J1|C4Q5J1_SCHMA Uncharacterized protein OS=Schistosoma mansoni GN=Smp_138600 PE=4 SV=1	16	58.617	0.195139	0.709657	-0.291815	1.22418	FALSE	20.4133802990573	20.24807186489	20.1403983829239	20.439787172545	20.8587356750261	20.3787729048606
C4Q5J4	tr|C4Q5J4|C4Q5J4_SCHMA Uncharacterized protein OS=Schistosoma mansoni GN=Smp_138620 PE=4 SV=2	2	342.87	0.214849	0.667867	-1.53184	2.89155	FALSE	14.2283307302282	14.5011210631332	12.9118324479119	12.9217850690807	16.7283771131995	16.5866474083895
C4Q5J8;C4Q5J9;Q5QEI6	tr|C4Q5J8|C4Q5J8_SCHMA Glycerol-3-phosphate dehydrogenase [NAD(+)] OS=Schistosoma mansoni GN=Smp_030500.1 PE=3 SV=1;tr|C4Q5J9|C4Q5J9_SCHMA Glycerol-3-phosphate dehydrogenase [NAD(+)] OS=Schistosoma mansoni GN=Smp_030500.2 PE=3 SV=1;tr|Q5QEI6|Q5QEI6_SCHMA G	21	38.861	0.100063	0.999728	-0.771839	1.70744	FALSE	23.3565959125874	22.6117472202096	23.8914966399733	24.570820881442	23.7311339077994	23.8734008679696
C4Q5M7	tr|C4Q5M7|C4Q5M7_SCHMA Syntaxin, putative OS=Schistosoma mansoni GN=Smp_138840 PE=4 SV=2	3	37.221	0.148533	0.828177	-0.666725	1.58747	FALSE	17.3474575882002	16.06951094396	16.1472364168508	17.2356060146917	16.8206746921006	17.5080989228755
C4Q5Q2	tr|C4Q5Q2|C4Q5Q2_SCHMA Uncharacterized protein OS=Schistosoma mansoni GN=Smp_139120 PE=4 SV=2	3	22.392	0.0041775	2.37908	3.73005	13.2696	TRUE	18.4111799072972	19.6480801383309	20.123940843916	15.4822881553674	14.2728824249109	17.2378850848578
C4Q5U3	tr|C4Q5U3|C4Q5U3_SCHMA Ankyrin 2,3/unc44, putative (Fragment) OS=Schistosoma mansoni GN=Smp_139110 PE=4 SV=2	24	105.7	0.102907	0.987554	0.414607	1.33294	FALSE	21.871273535121	21.4415661936063	21.6276201445977	21.5302058297756	21.0287183458787	21.1377136921776
C4Q5U5	tr|C4Q5U5|C4Q5U5_SCHMA Basigin related OS=Schistosoma mansoni GN=Smp_031880 PE=2 SV=1	8	32.499	0.752168	0.123685	0.0935474	1.06699	FALSE	23.8840308297305	24.3837996434099	24.3332596360603	23.777766807397	23.940039840019	24.6026412102287
C4Q5Z1;C4Q5Z2	tr|C4Q5Z1|C4Q5Z1_SCHMA Uncharacterized protein OS=Schistosoma mansoni GN=Smp_031950.2 PE=4 SV=1;tr|C4Q5Z2|C4Q5Z2_SCHMA Uncharacterized protein OS=Schistosoma mansoni GN=Smp_031950.1 PE=4 SV=1	2	24.572	0.141854	0.848158	0.667534	1.58836	FALSE	18.8383307331167	18.5234892049002	18.1228369706026	18.1988154726776	18.2534626555794	17.029778204988
C4Q6M8	tr|C4Q6M8|C4Q6M8_SCHMA Purple acid phosphatase OS=Schistosoma mansoni GN=Smp_140610 PE=3 SV=2	2	53.863	0.137125	0.862883	0.438313	1.35502	FALSE	17.9903716201604	18.3617513418897	18.7881532510125	17.7458424574399	17.9296157077162	18.149878526897
C4Q7T4	tr|C4Q7T4|C4Q7T4_SCHMA Nuclear protein localization, putative OS=Schistosoma mansoni GN=Smp_039180.1 PE=4 SV=1	13	77.432	0.563183	0.249351	-0.136206	1.09901	FALSE	18.5601944077912	18.9254848230153	18.8293716081141	18.9339818260014	19.2007361932531	18.5889522008992
C4Q820;G4VKI3	tr|C4Q820|C4Q820_SCHMA Putative cytochrome C oxidase polypeptide vib OS=Schistosoma mansoni GN=Smp_144000 PE=4 SV=1;tr|G4VKI3|G4VKI3_SCHMA Putative cytochrome C oxidase polypeptide vib OS=Schistosoma mansoni GN=Smp_144010.2 PE=4 SV=1	6	11.456	0.159476	0.797306	-0.512086	1.42611	FALSE	21.9131794638668	21.2580923003992	20.8850597842077	21.8475019279898	22.1766393476611	21.5684469736021
C4Q9B4	tr|C4Q9B4|C4Q9B4_SCHMA Dynamin, putative OS=Schistosoma mansoni GN=Smp_044920 PE=3 SV=2	24	92.81	0.74385	0.128514	-0.0682564	1.04845	FALSE	21.7759562510652	21.9304973872249	21.371110332395	21.8188280750899	21.732995815638	21.7305094198128
C4QB35	tr|C4QB35|C4QB35_SCHMA Heterogeneous nuclear ribonucleoprotein l (Hnrnp l), putative OS=Schistosoma mansoni GN=Smp_051530 PE=4 SV=1	8	61.346	0.040388	1.39375	0.444899	1.36122	FALSE	19.9317707979319	19.7868864351858	20.0963617665669	19.5223396981998	19.5956330515422	19.3623490076659
C4QB42	tr|C4QB42|C4QB42_SCHMA Heterogeneous nuclear ribonucleoprotein l (Hnrnp l), putative OS=Schistosoma mansoni GN=Smp_149700 PE=4 SV=2	1	59.166	0.604713	0.218451	-0.115734	1.08353	FALSE	15.6290206629763	16.0125194934443	15.8854853045754	16.1768228351937	15.661698176912	16.0357063620947
C4QBN1;Q9GSS8;G4LXZ8	tr|C4QBN1|C4QBN1_SCHMA Histone H4 OS=Schistosoma mansoni GN=Smp_053300 PE=3 SV=1;tr|Q9GSS8|Q9GSS8_SCHMA Histone H4 (Fragment) OS=Schistosoma mansoni PE=3 SV=1;tr|G4LXZ8|G4LXZ8_SCHMA Histone H4 (Fragment) OS=Schistosoma mansoni GN=Smp_149600 PE=3 SV=1	8	11.367	0.00471618	2.32641	1.46413	2.75898	TRUE	26.9861704746989	25.8145803379581	26.1350752554096	25.0867681091356	24.7427818243627	24.7138748158095
C4QBX7	tr|C4QBX7|C4QBX7_SCHMA Uncharacterized protein OS=Schistosoma mansoni GN=Smp_151230 PE=4 SV=1	1	8.6766	0.187029	0.72809	0.353134	1.27733	FALSE	19.7407947353617	19.1895941978629	19.0130182577345	18.9437029428165	19.0939955749049	18.846307788995
C4QCA0;C4QCA1	tr|C4QCA0|C4QCA0_SCHMA Chmp1 (Chromatin modifying protein) (Charged multivesicular body protein), putative OS=Schistosoma mansoni GN=Smp_055880.1 PE=4 SV=2;tr|C4QCA1|C4QCA1_SCHMA Chmp1 (Chromatin modifying protein) (Charged multivesicular body protein), pu	4	25.953	0.852585	0.0692625	0.0420449	1.02957	FALSE	19.2620347908613	19.5786616982097	19.7856035083091	19.5611620842512	19.2551987102072	19.6838045898442
C4QCD2	sp|C4QCD2|PURA_SCHMA Adenylosuccinate synthetase OS=Schistosoma mansoni GN=Smp_055990 PE=3 SV=2	6	46.668	0.187498	0.727002	0.337752	1.26379	FALSE	20.2803728986264	20.07968727791	20.264243095851	19.9277143383669	19.4897236740094	20.1936089821906
C4QDC5	tr|C4QDC5|C4QDC5_SCHMA Sugar nucleotide epimerase related OS=Schistosoma mansoni GN=Smp_154040 PE=4 SV=2	7	32.511	0.283819	0.546958	-0.257323	1.19526	FALSE	20.263231765805	20.4578475643572	20.0827181811895	20.307597931712	20.8603660065587	20.4078016088598
C4QDC9	tr|C4QDC9|C4QDC9_SCHMA Derlin OS=Schistosoma mansoni GN=Smp_059350.2 PE=3 SV=1	1	29.056	0.822212	0.0850163	-0.0754247	1.05367	FALSE	18.4431345457774	17.4100044865239	17.8536268566362	18.3019783106835	17.663369984511	17.9676915707054
C4QDY7;C4QDY6	tr|C4QDY7|C4QDY7_SCHMA Nonsense-mediated mRNA decay protein 1 (Rent1),putative OS=Schistosoma mansoni GN=Smp_061590.2 PE=4 SV=1;tr|C4QDY6|C4QDY6_SCHMA Nonsense-mediated mRNA decay protein 1 (Rent1),putative OS=Schistosoma mansoni GN=Smp_061590.1 PE=4 SV=1	5	142.25	0.777938	0.109055	0.213263	1.15931	FALSE	14.6007218123549	15.5120490818245	16.907466197256	15.9901197503181	14.3635494922011	16.0267784710679
C4QEK9	tr|C4QEK9|C4QEK9_SCHMA Filamin-related OS=Schistosoma mansoni GN=Smp_156590 PE=4 SV=2	49	179.18	0.00124673	2.90423	0.885725	1.84769	FALSE	22.0055831779354	22.1413806877408	22.0688394845635	21.2593171089696	21.0697172801905	21.2295926393338
C4QFX9;C4QFY0	tr|C4QFX9|C4QFX9_SCHMA Heat shock protein 70 (Hsp70)-4, putative OS=Schistosoma mansoni GN=Smp_069130.2 PE=3 SV=1;tr|C4QFY0|C4QFY0_SCHMA Heat shock protein 70 (Hsp70)-4, putative OS=Schistosoma mansoni GN=Smp_069130.1 PE=3 SV=1	37	94.463	0.426909	0.369664	-0.143326	1.10445	FALSE	23.9413293304618	23.8640888030408	23.6406822827907	24.0351910440102	23.8449901193849	23.9958973668518
C4QGD9;C4QGD8	tr|C4QGD9|C4QGD9_SCHMA Subfamily M12B unassigned peptidase (M12 family) OS=Schistosoma mansoni GN=Smp_160620.2 PE=4 SV=2;tr|C4QGD8|C4QGD8_SCHMA Subfamily M12B unassigned peptidase (M12 family) (Fragment) OS=Schistosoma mansoni GN=Smp_160620.1 PE=4 SV=2	2	93.591	0.300607	0.522001	0.74068	1.67096	FALSE	16.8582548823921	16.6018385830161	16.0093748072506	16.4492157703159	14.2728824249109	16.525330217957
C4QH88;Q9XY89	tr|C4QH88|C4QH88_SCHMA Annexin OS=Schistosoma mansoni GN=Smp_074150.1 PE=1 SV=1;tr|Q9XY89|Q9XY89_SCHMA Annexin OS=Schistosoma mansoni PE=2 SV=1	25	41.415	0.00513966	2.28907	-0.847601	1.79951	FALSE	23.9542839322273	24.2871353418418	24.2039675258596	24.7535591093614	25.0281415480136	25.2064895905481
C4QIB9	tr|C4QIB9|C4QIB9_SCHMA Uncharacterized protein OS=Schistosoma mansoni GN=Smp_078030.1 PE=4 SV=1	1	16.576	0.464822	0.332713	0.437009	1.35379	FALSE	19.9426813092942	20.3888247315343	21.9200057311787	20.6373896349345	20.5513229061695	19.751771423568
C4QIH2	tr|C4QIH2|C4QIH2_SCHMA Lupus la ribonucleoprotein, putative OS=Schistosoma mansoni GN=Smp_164650 PE=4 SV=2	18	42.49	0.0962177	1.01674	0.381979	1.30313	FALSE	22.0573041400028	22.423533987084	21.9632169086593	21.6333742929881	21.7728892782186	21.8918532203506
C4QII1	tr|C4QII1|C4QII1_SCHMA Uncharacterized protein OS=Schistosoma mansoni GN=Smp_164760 PE=4 SV=1	13	134.09	0.210014	0.677752	-0.410468	1.32912	FALSE	18.3616831632228	17.9369903730596	17.413948942629	18.6100624823743	18.1527985540939	18.1811642158239
C4QII3	tr|C4QII3|C4QII3_SCHMA Uncharacterized protein OS=Schistosoma mansoni GN=Smp_164780 PE=4 SV=2	1	32.578	0.0230492	1.63734	-0.52438	1.43832	FALSE	14.3016641782644	14.5011210631332	14.4707619788912	14.7716728326432	15.1176564298577	14.9573585628295
C4QJA1	tr|C4QJA1|C4QJA1_SCHMA ATP synthase delta chain, mitochondrial,putative OS=Schistosoma mansoni GN=Smp_082120 PE=3 SV=1	6	17.354	0.0015375	2.81318	-0.941869	1.92102	FALSE	22.6118901129718	22.3346696489288	22.2634187073861	23.3546636458889	23.4142092969011	23.2667119025402
C4QJA9	tr|C4QJA9|C4QJA9_SCHMA Translation initiation factor 2b, delta subunit,putative OS=Schistosoma mansoni GN=Smp_166550 PE=3 SV=1	4	45.929	0.00297935	2.52588	-2.50979	5.69539	TRUE	15.4728881444016	14.5011210631332	16.2002122083454	18.6203888591402	17.4311523396064	17.6520639903835
C4QJB2;Q8MTY0	tr|C4QJB2|C4QJB2_SCHMA NADPH:adrenodoxin oxidoreductase, mitochondrial OS=Schistosoma mansoni GN=Smp_166580 PE=3 SV=1;tr|Q8MTY0|Q8MTY0_SCHMA NADPH:adrenodoxin oxidoreductase, mitochondrial OS=Schistosoma mansoni PE=2 SV=1	2	60.272	0.0173334	1.76112	-1.32507	2.50544	FALSE	18.4984334868415	18.6363019366873	19.9364730698161	20.5099977388921	20.2769580146136	20.2594486234931
C4QKQ7	tr|C4QKQ7|C4QKQ7_SCHMA Fascin, putative OS=Schistosoma mansoni GN=Smp_169730 PE=4 SV=1	9	68.956	0.496698	0.303908	-0.127801	1.09263	FALSE	19.7171995831003	19.6107713862057	19.3054547526325	19.667781468713	19.7176567632887	19.631390067954
C4QKY6	tr|C4QKY6|C4QKY6_SCHMA Spectrin beta chain, brain 4 (Spectrin, non-erythroid beta chain 4) (Beta-V spectrin) (BSPECV),putative OS=Schistosoma mansoni GN=Smp_170310 PE=4 SV=2	21	47.589	0.0780126	1.10784	-0.337153	1.26326	FALSE	24.0880258605416	24.0814630370003	24.0839811460433	24.4413894507338	24.2692384006618	24.5542997557504
C4QL66	tr|C4QL66|C4QL66_SCHMA Ubiquitin (Ribosomal protein L40), putative OS=Schistosoma mansoni GN=Smp_089430 PE=4 SV=1	1	14.615	0.172732	0.762627	-0.377917	1.29946	FALSE	18.1569606757487	18.9099298208023	18.5408072974244	19.0729834386978	18.7150379065583	18.9534285163548
C4QLP6	tr|C4QLP6|C4QLP6_SCHMA Ubiquitin-fold modifier 1 OS=Schistosoma mansoni GN=Smp_091230 PE=3 SV=1	2	9.1094	0.845014	0.073136	-0.0702872	1.04993	FALSE	21.452074190325	20.8003985267137	20.7004908425067	21.2871583167648	21.4203514333068	20.4563155400418
C4QLY5	tr|C4QLY5|C4QLY5_SCHMA NADH-ubiquinone oxidoreductase mitochondrial, putative OS=Schistosoma mansoni GN=Smp_092570 PE=3 SV=1	11	31.704	0.0864123	1.06342	-0.481492	1.39619	FALSE	21.6665502662979	21.7621595270166	22.2349497282623	22.0807274999934	22.5090992131979	22.5183076937761
C4QMB3;A9NI53	tr|C4QMB3|C4QMB3_SCHMA 26S protease regulatory subunit, putative OS=Schistosoma mansoni GN=Smp_173840 PE=3 SV=1;tr|A9NI53|A9NI53_SCHMA 26S proteasome subunit ATPase 4 (Fragment) OS=Schistosoma mansoni GN=RPT4 PE=2 SV=1	16	49.181	0.10624	0.973714	-0.324954	1.25262	FALSE	21.5193778216678	21.3000364313908	21.4303645226122	21.5595219875971	21.7913813613326	21.8737384804941
C4QMH7	tr|C4QMH7|C4QMH7_SCHMA Uncharacterized protein OS=Schistosoma mansoni GN=Smp_095250 PE=4 SV=1	6	20.287	0.30177	0.520323	-0.319582	1.24797	FALSE	22.37315806301	21.6772559144336	21.4001807119162	22.1676840183624	22.2411149095624	22.0005423717278
C4QMI1	tr|C4QMI1|C4QMI1_SCHMA Serine-threonine kinase receptor-associated protein (Strap), putative OS=Schistosoma mansoni GN=Smp_174390 PE=4 SV=2	9	40.101	0.0896201	1.04759	-0.733256	1.66239	FALSE	18.1721838358319	19.3459496551741	18.6631225167987	19.1296507415882	19.8851267258941	19.3662457064057
C4QMW6	tr|C4QMW6|C4QMW6_SCHMA Uncharacterized protein OS=Schistosoma mansoni GN=Smp_096790 PE=4 SV=2	1	20.919	0.10022	0.999046	0.724739	1.6526	FALSE	22.7464491141767	22.7365121372949	22.0974243991369	22.4667177247961	21.7196259561832	21.2198236901414
C4QMW7	tr|C4QMW7|C4QMW7_SCHMA 26S proteasome regulatory subunit rpn2,putative OS=Schistosoma mansoni GN=Smp_175250 PE=4 SV=2	15	107.81	0.647251	0.188927	-0.148196	1.10818	FALSE	20.1846491448734	19.6909318230804	19.7037356908989	20.5143413273498	19.5077285712764	20.0018346813556
C4QNM9;C4QJB5;C4QHD7	tr|C4QNM9|C4QNM9_SCHMA Histone H3, putative OS=Schistosoma mansoni GN=Smp_177140 PE=3 SV=1;tr|C4QJB5|C4QJB5_SCHMA Histone H3 OS=Schistosoma mansoni GN=Smp_082240 PE=3 SV=1;tr|C4QHD7|C4QHD7_SCHMA Histone H3 OS=Schistosoma mansoni GN=Smp_074610 PE=3 SV=1	1	10.35	0.0042957	2.36697	1.5305	2.88886	TRUE	24.0438981656667	22.9580180731462	23.9522506710524	22.4106216749223	22.0730126033262	21.8790378386916
C4QNP4	tr|C4QNP4|C4QNP4_SCHMA Cytidylate kinase (Fragment) OS=Schistosoma mansoni GN=Smp_177230 PE=4 SV=2	1	8.3635	0.0171074	1.76682	-0.843315	1.79417	FALSE	19.167804180067	19.9401014644892	19.2514395501572	20.2758479318598	20.4681319035117	20.1453096588088
C4QNZ6	tr|C4QNZ6|C4QNZ6_SCHMA Phenylalanyl-tRNA synthetase alpha chain,putative OS=Schistosoma mansoni GN=Smp_101240 PE=4 SV=2	1	26.119	0.0487338	1.31217	-1.57392	2.97712	FALSE	16.7595266236989	14.5011210631332	14.4707619788912	16.8374025529347	16.7103448237713	16.9054086455614
C4QP14	tr|C4QP14|C4QP14_SCHMA 60S ribosomal protein L7, putative OS=Schistosoma mansoni GN=Smp_101450 PE=4 SV=1	2	29.663	0.735924	0.133167	-0.28979	1.22246	FALSE	15.9084875786061	15.8767654032871	16.7207770037214	14.6259766897051	16.9531420838955	17.7962821196338
C4QP66	tr|C4QP66|C4QP66_SCHMA Uncharacterized protein OS=Schistosoma mansoni GN=Smp_178810 PE=4 SV=1	12	44.263	0.280207	0.552521	-0.228029	1.17123	FALSE	20.9462511795846	21.1320917940767	21.398902293542	21.4740371014343	21.2184110855763	21.4688842135449
C4QPK4;C4QPK3	tr|C4QPK4|C4QPK4_SCHMA Eukaryotictranslation initiation factor,putative OS=Schistosoma mansoni GN=Smp_103460.2 PE=4 SV=1;tr|C4QPK3|C4QPK3_SCHMA Eukaryotictranslation initiation factor,putative OS=Schistosoma mansoni GN=Smp_103460.1 PE=4 SV=1	8	31.912	0.0314801	1.50196	-0.538291	1.45225	FALSE	19.9915616120132	19.6431315002823	20.008200074975	20.6188866039699	20.2791758398634	20.3597044469388
C4QPK6	tr|C4QPK6|C4QPK6_SCHMA Mago nashi protein homolog OS=Schistosoma mansoni GN=Smp_103470.1 PE=4 SV=2	6	16.954	0.494071	0.306211	0.273646	1.20886	FALSE	20.9347344985507	21.2438354838887	20.449819800015	21.0619291810436	20.8448778284636	19.9006452865326
C4QPU0	tr|C4QPU0|C4QPU0_SCHMA Phospholipid-transporting ATPase OS=Schistosoma mansoni GN=Smp_104500 PE=3 SV=1	3	123.32	0.875151	0.0579171	-0.114475	1.08258	FALSE	15.4450634210932	14.8939429249922	16.2709671417844	15.9050029856199	14.2728824249109	16.7755130473001
C4QPU2	tr|C4QPU2|C4QPU2_SCHMA Vacuolar protein sorting-associated, putative OS=Schistosoma mansoni GN=Smp_104520 PE=3 SV=1	3	69.28	0.802234	0.0956987	-0.0701773	1.04985	FALSE	16.5421084567102	16.7225279977323	16.0312135597866	16.6307295416189	16.1396764268753	16.7359759229159
C4QPU7;C4QPU5;C4QPU6;C4QPU4	tr|C4QPU7|C4QPU7_SCHMA Phosphoglucomutase, putative OS=Schistosoma mansoni GN=Smp_180530.3 PE=3 SV=2;tr|C4QPU5|C4QPU5_SCHMA Phosphoglucomutase, putative OS=Schistosoma mansoni GN=Smp_180530.2 PE=3 SV=2;tr|C4QPU6|C4QPU6_SCHMA Phosphoglucomutase, putative OS	5	44.212	0.297172	0.526992	-0.189584	1.14043	FALSE	22.9363906326299	22.7469289310468	22.6211993836569	22.8976254074157	23.0457205232931	22.9299253650529
C4QPU8	tr|C4QPU8|C4QPU8_SCHMA Phosphoglucomutase, putative OS=Schistosoma mansoni GN=Smp_180530.4 PE=3 SV=2	14	44.898	0.132124	0.879017	-0.272417	1.20783	FALSE	23.8443965135708	23.730245624814	23.9459846785293	24.0445292425223	24.1916697143424	24.1016792140389
C4QPU9	tr|C4QPU9|C4QPU9_SCHMA Uncharacterized protein OS=Schistosoma mansoni GN=Smp_180540 PE=4 SV=1	3	30.921	0.526137	0.278901	0.198412	1.14744	FALSE	18.6961868285629	19.2845006518447	19.5298392573876	18.6296110458066	19.3050483650304	18.980630010264
C4QQ81;C4QQ82	tr|C4QQ81|C4QQ81_SCHMA NADH-ubiquinone oxidoreductase 39 kD subunit,putative OS=Schistosoma mansoni GN=Smp_106080.1 PE=4 SV=1;tr|C4QQ82|C4QQ82_SCHMA NADH-ubiquinone oxidoreductase 39 kD subunit,putative OS=Schistosoma mansoni GN=Smp_106080.2 PE=4 SV=1	10	37.678	0.897463	0.0469836	-0.0713051	1.05067	FALSE	19.9721733236197	18.8315356922138	20.8417793138781	20.2017846355318	20.155939839236	19.5016790790533
C4QRU8	tr|C4QRU8|C4QRU8_SCHMA Uncharacterized protein (Fragment) OS=Schistosoma mansoni GN=Smp_186680 PE=4 SV=1	2	15.139	0.377821	0.422714	-0.182625	1.13495	FALSE	19.2251741378224	19.5262596344888	19.0550941768338	19.4080338231259	19.5923904783356	19.3539784135953
C4QS25	tr|C4QS25|C4QS25_SCHMA Uncharacterized protein OS=Schistosoma mansoni GN=Smp_187350 PE=4 SV=2	6	201.96	0.498108	0.302676	-0.300661	1.23171	FALSE	18.4046436060311	17.0742999151161	18.3481046197375	18.5985412238632	17.9006376229076	18.2298516019362
C4QT67	tr|C4QT67|C4QT67_SCHMA Uncharacterized protein (Fragment) OS=Schistosoma mansoni GN=Smp_190770 PE=4 SV=2	3	16.85	0.0924736	1.03398	0.461664	1.37713	FALSE	19.725414153892	19.5682124741101	19.9565905057481	19.66564319199	19.1392369604432	19.0603437202713
C4QTZ4;C4QTH5	tr|C4QTZ4|C4QTZ4_SCHMA Tsg101-related (Fragment) OS=Schistosoma mansoni GN=Smp_193270 PE=4 SV=2;tr|C4QTH5|C4QTH5_SCHMA Uncharacterized protein OS=Schistosoma mansoni GN=Smp_191690 PE=4 SV=2	1	7.5955	0.526993	0.278195	-0.19185	1.14223	FALSE	17.9800170328669	18.0614138532191	18.5592756485869	17.9381332650564	18.4743008411339	18.7638235503745
C4QU02	tr|C4QU02|C4QU02_SCHMA Ribosomal protein S9, putative OS=Schistosoma mansoni GN=Smp_119920 PE=3 SV=1	5	16.859	0.160044	0.79576	0.7979	1.73857	FALSE	22.7527708582205	22.073658338275	21.162315833538	21.910729777201	20.8702566180727	20.8140594647153
C4QU53	tr|C4QU53|C4QU53_SCHMA Tsg101-related OS=Schistosoma mansoni GN=Smp_193790 PE=4 SV=1	3	29.008	0.278987	0.554416	-1.07836	2.11163	FALSE	19.0578722846287	15.7341088166517	18.7453727013277	18.3920851731373	19.0958589041285	19.28448549772
C4QU54	tr|C4QU54|C4QU54_SCHMA Spliceosome-associated protein, putative OS=Schistosoma mansoni GN=Smp_120320.1 PE=4 SV=1	2	73.956	0.112003	0.950771	3.1425	8.8305	FALSE	22.3644087308195	16.0204922198408	16.8419593020314	15.9643258635032	14.2728824249109	15.5621642544364
C7DPD5;G4VSY8	tr|C7DPD5|C7DPD5_SCHMA cAMP-dependent protein kinase catalytic subunit OS=Schistosoma mansoni PE=2 SV=1;tr|G4VSY8|G4VSY8_SCHMA Serine/threonine kinase OS=Schistosoma mansoni GN=Smp_152330 PE=3 SV=1	9	40.434	0.00117794	2.92888	0.873411	1.83199	FALSE	21.7546703361698	21.7146223279541	21.660601488692	20.86824431866	20.7382447748668	20.9031732688106
D7R925;A8TKU6;G4VJ94	tr|D7R925|D7R925_SCHMA Alkaline phosphatase OS=Schistosoma mansoni GN=AP PE=2 SV=1;tr|A8TKU6|A8TKU6_SCHMA Alkaline phosphatase OS=Schistosoma mansoni PE=2 SV=1;tr|G4VJ94|G4VJ94_SCHMA Putative alkaline phosphatase OS=Schistosoma mansoni GN=Smp_155890 PE=3 S	14	59.374	0.00124375	2.90527	1.47733	2.78433	TRUE	22.3382276030443	22.924478481198	22.4647457917306	20.7389133606188	21.1593753313167	21.397165667903
E2EAJ1;G4VNM6	tr|E2EAJ1|E2EAJ1_SCHMA GDP-D-mannose-4,6-dehydratase OS=Schistosoma mansoni GN=GMD PE=2 SV=1;tr|G4VNM6|G4VNM6_SCHMA GDP-mannose 4,6-dehydratase OS=Schistosoma mansoni GN=Smp_153490 PE=3 SV=1	8	41.133	0.157233	0.803456	0.273666	1.20888	FALSE	19.8587362802585	20.0579685908227	20.1077017263103	19.7562494622655	19.8592397924326	19.5879199893876
E7BBC0;G4V5U8	tr|E7BBC0|E7BBC0_SCHMA Integrin beta OS=Schistosoma mansoni GN=beta-Int1 PE=2 SV=1;tr|G4V5U8|G4V5U8_SCHMA Integrin beta OS=Schistosoma mansoni GN=Smp_089700 PE=3 SV=1	20	95.491	0.126313	0.898551	-0.302191	1.23302	FALSE	20.5972381670673	20.7226797212534	20.6992269834325	20.8584487506654	20.8824888174569	21.1847803051344
E7BBC2;G4V8A1;A0A0E3X4V1	tr|E7BBC2|E7BBC2_SCHMA Alpha integrin receptor 2 OS=Schistosoma mansoni GN=alpha-Int2 PE=2 SV=1;tr|G4V8A1|G4V8A1_SCHMA Putative integrin alpha-ps OS=Schistosoma mansoni GN=Smp_170280 PE=3 SV=1;tr|A0A0E3X4V1|A0A0E3X4V1_SCHMA Integrin OS=Schistosoma mansoni	9	172.45	0.00209517	2.67878	-2.13073	4.37939	TRUE	15.2284174805966	14.1564477556926	15.5569570673391	17.2731679457478	16.6927499570766	17.3680942648601
E7BBH9;G4VLL9	tr|E7BBH9|E7BBH9_SCHMA cGMP-dependent protein kinase 1 OS=Schistosoma mansoni GN=cGK1 PE=2 SV=1;tr|G4VLL9|G4VLL9_SCHMA Serine/threonine kinase OS=Schistosoma mansoni GN=Smp_123290 PE=4 SV=1	17	114.99	0.685979	0.163689	0.0787134	1.05608	FALSE	19.8201542830661	20.0967620748563	20.1607425563473	19.9603538940645	19.7707472150331	20.1104177409965
E9LZR7;E9LZR8;G4VT44;G4VT45	tr|E9LZR7|E9LZR7_SCHMA Calmodulin 1 OS=Schistosoma mansoni PE=2 SV=1;tr|E9LZR8|E9LZR8_SCHMA Calmodulin 2 OS=Schistosoma mansoni PE=2 SV=1;tr|G4VT44|G4VT44_SCHMA Putative calmodulin OS=Schistosoma mansoni GN=Smp_026560.2 PE=4 SV=1;tr|G4VT45|G4VT45_SCHMA Put	6	16.807	0.0556173	1.25479	-0.5894	1.50462	FALSE	22.3575576635193	22.6374936229586	22.092378505486	23.1293094075052	23.1582160140015	22.5681056464527
G4LUA3	tr|G4LUA3|G4LUA3_SCHMA p25 alpha-related OS=Schistosoma mansoni GN=Smp_097490 PE=4 SV=1	8	19.049	0.000196468	3.70671	1.55175	2.93172	TRUE	23.1620843870306	23.1665659684187	23.0464372656949	21.4471196205454	21.8746633670294	21.3980621097486
G4LUA9;G4LUA8	tr|G4LUA9|G4LUA9_SCHMA Protein RER1 OS=Schistosoma mansoni GN=Smp_019490.4 PE=3 SV=1;tr|G4LUA8|G4LUA8_SCHMA Protein RER1 OS=Schistosoma mansoni GN=Smp_019490.1 PE=3 SV=1	4	21.766	0.537231	0.269839	-0.166708	1.12249	FALSE	20.9427399030332	20.5654992610123	20.0763345643986	20.594365547892	20.7952994642566	20.6950329307453
G4LUB6	tr|G4LUB6|G4LUB6_SCHMA Translation factor sui1, putative OS=Schistosoma mansoni GN=Smp_019440 PE=4 SV=1	2	12.49	0.838127	0.0766903	-0.0727119	1.05169	FALSE	20.0533751188219	19.3817878574787	18.9023600830404	19.6787436836195	19.7125127591693	19.1644024251398
G4LUB7	tr|G4LUB7|G4LUB7_SCHMA Uncharacterized protein OS=Schistosoma mansoni GN=Smp_019430 PE=4 SV=1	6	32.411	0.214757	0.668053	-0.789128	1.72803	FALSE	18.4226106790432	16.9166816158313	18.9587347895852	18.3322481321323	19.2440925624475	19.089070212902
G4LUC1	tr|G4LUC1|G4LUC1_SCHMA Eukariotic translation initiation factor 2b,epsilon subunit, putative OS=Schistosoma mansoni GN=Smp_019380 PE=4 SV=1	5	85.415	0.00191523	2.71778	-1.86362	3.63919	TRUE	15.8041989182271	15.5327094282412	16.7770374440108	17.8057899405877	17.7611794501974	18.1378261387816
G4LUC3	tr|G4LUC3|G4LUC3_SCHMA Uncharacterized protein OS=Schistosoma mansoni GN=Smp_019350 PE=4 SV=1	5	14.128	0.287563	0.541267	0.232729	1.17506	FALSE	25.6246153056909	25.813174858722	25.2822840809364	25.2111477886989	25.3746984509077	25.4360395201005
G4LUC5	tr|G4LUC5|G4LUC5_SCHMA Fatty acid desaturase, putative OS=Schistosoma mansoni GN=Smp_132740 PE=4 SV=1	3	57.978	0.366464	0.435969	-0.775622	1.71193	FALSE	14.5089189280749	16.8718773436643	17.6829875693483	17.1750199919872	16.9837078683516	17.2319216310467
G4LUC6	tr|G4LUC6|G4LUC6_SCHMA Cytoplasmic dynein light chain, putative OS=Schistosoma mansoni GN=Smp_019310 PE=4 SV=1	5	12.149	0.00131481	2.88114	6.31003	79.3427	TRUE	22.3459464286428	21.9102629034848	21.9045786072603	18.425704627001	14.2728824249109	14.5321256808221
G4LUC8	tr|G4LUC8|G4LUC8_SCHMA Camp-dependent protein kinase regulatory chain,putative OS=Schistosoma mansoni GN=Smp_019280 PE=4 SV=1	9	40.271	0.115762	0.936433	-0.348498	1.27323	FALSE	20.814449871091	21.2160979211564	21.1872576980336	21.4674544044781	21.5281527133054	21.2676931529499
G4LUD7	tr|G4LUD7|G4LUD7_SCHMA RuvB-like helicase OS=Schistosoma mansoni GN=Smp_132690 PE=3 SV=1	9	51.849	0.370887	0.430758	-0.207463	1.15466	FALSE	19.9188423799759	19.7083958925122	19.4173348813077	19.7345848393973	19.7854412767123	20.1469358034441
G4LUD9	tr|G4LUD9|G4LUD9_SCHMA Myosin regulatory light chain, putative OS=Schistosoma mansoni GN=Smp_132670.1 PE=4 SV=1	15	22.719	0.342663	0.465132	-0.231874	1.17436	FALSE	25.984459369269	25.8143169148765	25.3126718603112	25.8375462092875	26.0592455971338	25.9102782621592
G4LUE7;G4LUE8	tr|G4LUE7|G4LUE7_SCHMA Transmembrane gtpase mfn (Mitofusin 1) (Fzo homolog), putative OS=Schistosoma mansoni GN=Smp_132620.1 PE=3 SV=1;tr|G4LUE8|G4LUE8_SCHMA Transmembrane gtpase mfn (Mitofusin 1) (Fzo homolog), putative OS=Schistosoma mansoni GN=Smp_13262	3	76.528	0.166104	0.779621	-0.966028	1.95345	FALSE	14.2283307302282	15.7202262324208	14.4707619788912	15.0576353190559	15.3762356076307	16.883531610735
G4LUE9	tr|G4LUE9|G4LUE9_SCHMA Eh domain containing/past-1-related OS=Schistosoma mansoni GN=Smp_019100 PE=3 SV=1	9	62.177	0.198191	0.702916	-0.531558	1.44549	FALSE	18.2898929273548	18.9469360126061	19.6802814411303	19.3427518376457	19.6835700347088	19.4854631972417
G4LUF3	tr|G4LUF3|G4LUF3_SCHMA Hyaluronidase, putative OS=Schistosoma mansoni GN=Smp_000020 PE=4 SV=1	6	120.85	0.480599	0.318217	-0.415963	1.33419	FALSE	14.2283307302282	16.2836348832847	14.4707619788912	15.5601770989405	15.381067541767	15.2893712130253
G4LUF5;G4LUF6;G4LUF4	tr|G4LUF5|G4LUF5_SCHMA 26s proteasome regulatory particle subunit,putative OS=Schistosoma mansoni GN=Smp_000030.2 PE=4 SV=1;tr|G4LUF6|G4LUF6_SCHMA 26s proteasome regulatory particle subunit,putative OS=Schistosoma mansoni GN=Smp_000030.1 PE=4 SV=1;tr|G4LUF	20	106.03	0.302665	0.519038	-0.347738	1.27256	FALSE	19.9851751693536	19.1662100432307	19.6818728205422	20.3749770169446	19.569268602818	19.9322257971528
G4LUF7	tr|G4LUF7|G4LUF7_SCHMA Kinesin light chain, putative OS=Schistosoma mansoni GN=Smp_000040 PE=4 SV=1	20	47.158	0.20537	0.687462	0.211367	1.15778	FALSE	22.9633736870635	22.9445373317382	22.9688281419003	22.6661513197497	22.8297512350105	22.7467365926641
G4LUG1	tr|G4LUG1|G4LUG1_SCHMA 1-acyl-sn-glycerol-3-phosphate acyltransferase OS=Schistosoma mansoni GN=Smp_000070 PE=3 SV=1	2	29.916	0.132124	0.87902	1.41095	2.65912	FALSE	16.0898233905816	18.7945987017459	18.8205309489379	17.0998542717484	15.8579732335236	16.5142856086792
G4LUG8	tr|G4LUG8|G4LUG8_SCHMA Uncharacterized protein Smp_010230 OS=Schistosoma mansoni GN=Smp_010230 PE=4 SV=1	10	34.765	0.760696	0.118789	0.0536745	1.03791	FALSE	25.0309091285325	24.9355873289641	24.7485880892659	24.7406982731148	24.8367321832439	24.9766306325508
G4LUH3	tr|G4LUH3|G4LUH3_SCHMA Uncharacterized protein Smp_127450 OS=Schistosoma mansoni GN=Smp_127450 PE=4 SV=1	2	149.47	0.0578163	1.23795	-1.03292	2.04616	FALSE	16.6346028199517	17.8486497130777	16.6690812950077	17.763345979756	17.7687755980129	18.7189673623761
G4LUH6	tr|G4LUH6|G4LUH6_SCHMA Uncharacterized protein Smp_127420 OS=Schistosoma mansoni GN=Smp_127420 PE=4 SV=1	2	126.19	0.000314557	3.5023	-1.72714	3.31072	TRUE	19.2267389745283	19.7632274349722	19.0324471351957	20.9831134936743	21.1614807971937	21.0592539206291
G4LUH9	tr|G4LUH9|G4LUH9_SCHMA Translocon-associated protein, beta subunit (Trap-beta) (Signal sequence receptor beta subunit), putative OS=Schistosoma mansoni GN=Smp_009830 PE=4 SV=1	2	17.259	0.127937	0.893003	-0.485094	1.39968	FALSE	18.6351685514328	19.5414365772397	19.1275964366822	19.4370317857451	19.5082013535323	19.8142513592432
G4LUI6	tr|G4LUI6|G4LUI6_SCHMA NADH-ubiquinone oxidoreductase fe-s protein 2 (Ndufs2), putative OS=Schistosoma mansoni GN=Smp_127340 PE=3 SV=1	15	76.516	0.0565864	1.24729	-0.442121	1.3586	FALSE	20.8190854250416	20.7004507038031	20.411305029169	20.9505954209539	21.0659327813255	21.2406767502017
G4LUI7;G4LUI8	tr|G4LUI7|G4LUI7_SCHMA 14-3-3 protein, putative OS=Schistosoma mansoni GN=Smp_009780.1 PE=3 SV=1;tr|G4LUI8|G4LUI8_SCHMA 14-3-3 protein, putative OS=Schistosoma mansoni GN=Smp_009780.2 PE=3 SV=1	9	28.185	0.297927	0.525891	0.182894	1.13516	FALSE	24.4986278022894	24.3419330549292	24.5830543595392	24.2067197011124	24.3858684251236	24.2823439393911
G4LUJ6;G4LUJ7	tr|G4LUJ6|G4LUJ6_SCHMA Proteasome subunit beta type OS=Schistosoma mansoni GN=Smp_121430.2 PE=3 SV=1;tr|G4LUJ7|G4LUJ7_SCHMA Proteasome subunit beta type OS=Schistosoma mansoni GN=Smp_121430.1 PE=3 SV=1	6	23.031	0.463558	0.333896	-0.282159	1.21601	FALSE	21.597424273239	22.1336315903071	20.7776192241877	21.9037162854266	21.6097210224097	21.8417152003165
G4LUK7;G4LUK8	tr|G4LUK7|G4LUK7_SCHMA NADH-ubiquinone oxidoreductase, putative OS=Schistosoma mansoni GN=Smp_038870.2 PE=4 SV=1;tr|G4LUK8|G4LUK8_SCHMA NADH-ubiquinone oxidoreductase, putative OS=Schistosoma mansoni GN=Smp_038870.1 PE=3 SV=1	16	61.804	0.0118719	1.92548	-0.737458	1.66724	FALSE	21.5596214171009	21.1298354673095	21.0000116455242	21.9798041150534	21.8455888567331	22.0764487045867
G4LUL7	tr|G4LUL7|G4LUL7_SCHMA Uncharacterized protein OS=Schistosoma mansoni GN=Smp_143270 PE=4 SV=1	1	10.815	0.0859712	1.06565	-1.5851	3.00028	FALSE	16.9657291139508	14.5011210631332	17.4217641635809	17.4945407860642	18.0946001616255	18.0547673703042
G4LUP0	tr|G4LUP0|G4LUP0_SCHMA 26S proteasome subunit S9, putative OS=Schistosoma mansoni GN=Smp_061650 PE=4 SV=1	12	46.629	0.366942	0.435402	-0.309701	1.23945	FALSE	20.064322597303	21.0713086715652	21.0148191215359	20.7980897338647	21.1247082855511	21.1567552581829
G4LUP4	tr|G4LUP4|G4LUP4_SCHMA Protein farnesyltransferase alpha subunit,putative OS=Schistosoma mansoni GN=Smp_091770 PE=4 SV=1	1	19.931	0.683031	0.165559	0.518424	1.43239	FALSE	16.8355880559535	18.0902318314227	18.321549631383	19.1826964719059	17.9772747996557	14.5321256808221
G4LUR0	tr|G4LUR0|G4LUR0_SCHMA Serine/threonine protein phosphatase 2a regulatory subunit A, putative OS=Schistosoma mansoni GN=Smp_172280 PE=4 SV=1	16	66.082	0.589215	0.229726	0.38724	1.30789	FALSE	22.4373604688138	22.4623975234405	20.7920879996366	22.6986708365873	20.9311115036417	20.9003440409863
G4LUR5	tr|G4LUR5|G4LUR5_SCHMA Ubiquitin-specific peptidase 14 (C19 family) OS=Schistosoma mansoni GN=Smp_084740 PE=3 SV=1	7	45.348	0.0656998	1.18244	1.51594	2.85985	FALSE	19.3730113159258	19.8961359906612	19.0544447657017	18.8527648904573	18.5204021255916	16.4026040487858
G4LUS0;P91888	tr|G4LUS0|G4LUS0_SCHMA Calponin OS=Schistosoma mansoni GN=Smp_078690 PE=3 SV=1;tr|P91888|P91888_SCHMA Calponin OS=Schistosoma mansoni PE=2 SV=1	16	38.348	0.462526	0.334864	0.140161	1.10203	FALSE	24.6373989429107	24.8739527484873	24.730418646848	24.4484417314002	24.8190255341318	24.5538209958599
G4LUS4;G4LUS3	tr|G4LUS4|G4LUS4_SCHMA Uncharacterized protein OS=Schistosoma mansoni GN=Smp_154610.2 PE=4 SV=1;tr|G4LUS3|G4LUS3_SCHMA Uncharacterized protein OS=Schistosoma mansoni GN=Smp_154610.1 PE=4 SV=1	29	85.39	0.0126186	1.89899	-0.831122	1.77907	FALSE	22.0294701514475	22.4521398618001	21.7423780491882	22.9059144969994	22.7308098523082	23.0806291587991
G4LUT1	tr|G4LUT1|G4LUT1_SCHMA Family S9 non-peptidase homologue (S09 family) OS=Schistosoma mansoni GN=Smp_136690 PE=4 SV=1	3	74.727	0.213376	0.670854	-0.795007	1.73509	FALSE	16.2882798702944	16.4632580062765	14.3768291730363	16.3230247628105	16.5161962335873	16.674166636853
G4LUT7	tr|G4LUT7|G4LUT7_SCHMA Peptidase C1 family OS=Schistosoma mansoni GN=Smp_139240 PE=3 SV=1	3	44.321	1.13683e-07	6.9443	5.05236	33.1827	TRUE	19.5828166144981	19.5889481807277	19.4163023527017	14.6259766897051	14.2728824249109	14.5321256808221
G4LUV4	tr|G4LUV4|G4LUV4_SCHMA Subfamily C1A non-peptidase homologue (C01 family) OS=Schistosoma mansoni GN=Smp_187140 PE=3 SV=1	2	40.199	0.000419748	3.37701	3.78696	13.8035	TRUE	19.5096904069001	17.755559821573	17.5266261720842	14.6259766897051	14.2728824249109	14.5321256808221
G4LUW0	tr|G4LUW0|G4LUW0_SCHMA Prohibitin, putative OS=Schistosoma mansoni GN=Smp_075940 PE=4 SV=1	9	23.133	0.0104998	1.97882	-1.29518	2.45408	FALSE	23.4421090399234	22.8043889296948	22.116452965627	23.964110560067	24.2689594438203	24.0154318632762
G4LUW3	tr|G4LUW3|G4LUW3_SCHMA Isocitrate dehydrogenase [NADP] OS=Schistosoma mansoni GN=Smp_163050 PE=3 SV=1	14	50.74	0.0025942	2.586	-1.0429	2.06037	TRUE	20.4774738682059	19.9068759024961	20.3862798182552	21.2212788303826	21.2496789426189	21.4283815256626
G4LUX9	tr|G4LUX9|G4LUX9_SCHMA Serine/threonine protein phosphatase 2A regulatory subunit OS=Schistosoma mansoni GN=Smp_176600 PE=3 SV=1	3	71.887	0.901124	0.0452154	-0.119202	1.08613	FALSE	15.336581879362	17.0267146539601	14.4707619788912	16.5687340994622	16.5305954632526	14.0923358024902
G4LUY9	tr|G4LUY9|G4LUY9_SCHMA Protein transport protein Sec23, putative OS=Schistosoma mansoni GN=Smp_099310 PE=4 SV=1	8	89.307	0.127704	0.893797	-0.496486	1.41077	FALSE	18.4022167970207	19.0171756033072	18.528131925779	19.0889967895996	18.7820359293652	19.5659496278255
G4LUZ0	tr|G4LUZ0|G4LUZ0_SCHMA Eukaryotic translation initiation factor 3 subunit K OS=Schistosoma mansoni GN=Smp_099320 PE=3 SV=1	7	28.479	0.0238818	1.62193	-0.594522	1.50997	FALSE	20.0983857798016	20.6175293572226	20.419441582481	21.0408837047993	21.0432106658318	20.8348271632956
G4LV14	tr|G4LV14|G4LV14_SCHMA Sh3-containing grb2-like protein 3 (Endophilin III) OS=Schistosoma mansoni GN=Smp_036990 PE=4 SV=1	9	41.663	0.0618591	1.2086	0.518708	1.43267	FALSE	21.4410724348557	21.7156256976374	22.1288777321884	21.1156285593498	21.3789183365873	21.2349064392303
G4LV18;Q0JXE6;Q0JXE5;Q0JXE4	tr|G4LV18|G4LV18_SCHMA Uncharacterized protein OS=Schistosoma mansoni GN=Smp_142100 PE=4 SV=1;tr|Q0JXE6|Q0JXE6_SCHMA Transcriptional cofactor CA150 OS=Schistosoma mansoni GN=ca150 PE=2 SV=1;tr|Q0JXE5|Q0JXE5_SCHMA Transcriptional cofactor CA150 OS=Schistoso	12	242.43	0.848327	0.0714366	-0.0516345	1.03644	FALSE	17.9427691990103	18.6610135631454	17.826563039727	18.1508254427595	18.1754075032366	18.259016360944
G4LV34	tr|G4LV34|G4LV34_SCHMA Camp-dependent protein kinase type II-alpha regulatory subunit, putative OS=Schistosoma mansoni GN=Smp_079010 PE=4 SV=1	16	42.996	0.860044	0.0654793	-0.0408665	1.02873	FALSE	23.6317880930325	24.0197409589216	24.2936565034022	23.8676514804382	24.0893772509225	24.110756288712
G4LV40;G4LV41	tr|G4LV40|G4LV40_SCHMA 26S proteasome regulatory subunit S3, putative OS=Schistosoma mansoni GN=Smp_085310.2 PE=4 SV=1;tr|G4LV41|G4LV41_SCHMA 26S proteasome regulatory subunit S3, putative OS=Schistosoma mansoni GN=Smp_085310.1 PE=4 SV=1	16	57.793	0.595335	0.225238	-0.0953318	1.06831	FALSE	20.3617269881607	20.4236260926187	20.5910468122794	20.6826613196192	20.3861385313144	20.593595488353
G4LV45;G4LV43;G4LV44	tr|G4LV45|G4LV45_SCHMA Tropomyosin, putative OS=Schistosoma mansoni GN=Smp_085290.3 PE=4 SV=1;tr|G4LV43|G4LV43_SCHMA Tropomyosin, putative OS=Schistosoma mansoni GN=Smp_085290.1 PE=4 SV=1;tr|G4LV44|G4LV44_SCHMA Tropomyosin, putative OS=Schistosoma mansoni	2	23.254	0.072614	1.13898	2.18292	4.54072	FALSE	19.156581820071	19.0686881994382	19.1552225357916	18.3930419103642	17.9065603315272	14.5321256808221
G4LV50	tr|G4LV50|G4LV50_SCHMA SEC23-interacting protein (P125),putative OS=Schistosoma mansoni GN=Smp_197190 PE=4 SV=1	6	121.92	0.00536009	2.27083	-1.68113	3.2068	TRUE	16.6579747374696	15.3642820539311	15.2991759512482	17.2975109906275	17.5581517895662	17.5091740271749
G4LV54	tr|G4LV54|G4LV54_SCHMA Fer-1-related OS=Schistosoma mansoni GN=Smp_141010 PE=4 SV=1	74	219.17	0.75842	0.12009	0.0684789	1.04861	FALSE	22.73198535643	22.2706402368462	22.7140749019613	22.6543379883116	22.2697543286662	22.587171548283
G4LV57;G4LV56	tr|G4LV57|G4LV57_SCHMA Adenylate cyclase type IX, putative OS=Schistosoma mansoni GN=Smp_102340.2 PE=3 SV=1;tr|G4LV56|G4LV56_SCHMA Adenylate cyclase type IX, putative OS=Schistosoma mansoni GN=Smp_102340.1 PE=3 SV=1	4	71.344	0.558713	0.252811	0.728706	1.65715	FALSE	15.5675162595998	16.8728850636361	18.8857265887196	17.4669080697533	14.2728824249109	17.4002198224278
G4LV68;G4LV69	tr|G4LV68|G4LV68_SCHMA Mitochondrial processing peptidase non-peptidase alpha subunit (M16 family) OS=Schistosoma mansoni GN=Smp_094050.2 PE=3 SV=1;tr|G4LV69|G4LV69_SCHMA Mitochondrial processing peptidase non-peptidase alpha subunit (M16 family) OS=Schist	13	58.766	0.00663789	2.17797	-0.945438	1.92577	FALSE	19.8075167558984	20.5221134625446	20.3023187677104	21.0149147425945	21.1935228496338	21.2598243987224
G4LV70	tr|G4LV70|G4LV70_SCHMA Phenylalanyl-tRNA synthetase beta chain,putative OS=Schistosoma mansoni GN=Smp_094060 PE=4 SV=1	8	69.519	0.108408	0.964938	-1.38771	2.61664	FALSE	17.8119821638007	17.818481558851	15.1674955090523	18.337711006816	18.3192575293283	18.3041302766312
G4LV74	tr|G4LV74|G4LV74_SCHMA Serine/threonine kinase OS=Schistosoma mansoni GN=Smp_094090 PE=4 SV=1	2	23.424	0.112766	0.947824	-1.69885	3.24641	FALSE	14.2283307302282	14.5011210631332	17.0706209132042	17.007513289175	15.8488282038812	18.040272175468
G4LV77	tr|G4LV77|G4LV77_SCHMA Short chain dehydrogenase,putative OS=Schistosoma mansoni GN=Smp_081430 PE=4 SV=1	7	28.511	0.010923	1.96166	-1.06978	2.09911	FALSE	20.0446661240091	19.6643016398151	19.995958757465	21.5501057896927	20.7226847179636	20.6414612784229
G4LV80;G4LV81	tr|G4LV80|G4LV80_SCHMA 6-phosphogluconolactonase OS=Schistosoma mansoni GN=Smp_081460.3 PE=4 SV=1;tr|G4LV81|G4LV81_SCHMA 6-phosphogluconolactonase OS=Schistosoma mansoni GN=Smp_081460.1 PE=4 SV=1	7	26.621	0.91538	0.0383984	-0.0199712	1.01394	FALSE	21.4001059880363	21.469195669143	21.0762650218452	21.2880273578374	21.4457481429382	21.271704658445
G4LV82	tr|G4LV82|G4LV82_SCHMA Uncharacterized protein OS=Schistosoma mansoni GN=Smp_081470 PE=4 SV=1	2	28.032	0.0685801	1.1638	1.11478	2.16562	FALSE	20.4781814928766	18.7639260014768	18.8932938250123	18.6804179217119	18.0722134590966	18.038433566416
G4LV86	tr|G4LV86|G4LV86_SCHMA Striatin, putative OS=Schistosoma mansoni GN=Smp_166080.2 PE=4 SV=1	8	98.462	0.797573	0.0982296	0.0865744	1.06185	FALSE	19.6127143404472	20.2909774081362	19.1465583092707	19.4327630826578	19.5245770971218	19.8331868049143
G4LV90	tr|G4LV90|G4LV90_SCHMA Eukaryotictranslation initiation factor,putative OS=Schistosoma mansoni GN=Smp_176040 PE=4 SV=1	1	95.365	0.683864	0.16503	0.112769	1.0813	FALSE	16.518857165131	15.8201543182063	16.1144089797985	15.9744500807769	16.3759537972587	15.7647081892816
G4LV91	tr|G4LV91|G4LV91_SCHMA Uncharacterized protein OS=Schistosoma mansoni GN=Smp_192360 PE=4 SV=1	6	18.913	0.33892	0.469903	0.494651	1.40898	FALSE	19.5289225657385	19.4950910116763	19.6357311760097	19.6452784367509	19.5781764425182	17.9523362257477
G4LV92	tr|G4LV92|G4LV92_SCHMA Rab6, putative OS=Schistosoma mansoni GN=Smp_176050 PE=4 SV=1	3	22.437	0.871887	0.0595397	-0.0593558	1.042	FALSE	19.1694324618033	19.1371781303943	17.9906404538092	18.7386591009045	18.9639084114915	18.7727509510523
G4LV97;B8Y6H6	tr|G4LV97|G4LV97_SCHMA Uncharacterized protein OS=Schistosoma mansoni GN=Smp_176080 PE=4 SV=1;tr|B8Y6H6|B8Y6H6_SCHMA DIF_8 (Fragment) OS=Schistosoma mansoni PE=2 SV=1	3	33.194	0.514232	0.288841	-0.149883	1.10948	FALSE	18.5177169588721	18.8598383957389	18.2468003379685	18.5258803455288	18.8235647376417	18.7245593692144
G4LVB0	tr|G4LVB0|G4LVB0_SCHMA Uncharacterized protein OS=Schistosoma mansoni GN=Smp_033610 PE=4 SV=1	2	13.683	0.00443988	2.35263	-4.31323	19.8798	TRUE	17.7568631039893	14.5011210631332	14.4707619788912	19.013595536104	20.4444147604652	20.2104256233311
G4LVB4	tr|G4LVB4|G4LVB4_SCHMA Epsin 4/enthoprotin, putative OS=Schistosoma mansoni GN=Smp_140330 PE=4 SV=1	4	65.864	0.198111	0.703091	-1.33175	2.51708	FALSE	14.2283307302282	17.2504554316727	14.106127662126	15.7149989560549	16.7320084942201	17.1331573512551
G4LVB6;G4LVC0;G4LVB9;G4LVB8;G4LVB7	tr|G4LVB6|G4LVB6_SCHMA ATP synthase gamma subunit, putative OS=Schistosoma mansoni GN=Smp_033670.5 PE=3 SV=1;tr|G4LVC0|G4LVC0_SCHMA ATP synthase gamma subunit, putative OS=Schistosoma mansoni GN=Smp_033670.4 PE=4 SV=1;tr|G4LVB9|G4LVB9_SCHMA ATP synthase su	11	32.088	0.00394937	2.40347	-1.11766	2.16995	TRUE	22.7360481562791	21.9776818265366	22.6635669471686	23.5774470944782	23.5132740016921	23.6395674449984
G4LVC7;I6TRR3	tr|G4LVC7|G4LVC7_SCHMA DEAD box ATP-dependent RNA helicase, putative OS=Schistosoma mansoni GN=Smp_033710 PE=3 SV=1;tr|I6TRR3|I6TRR3_SCHMA Vasa-like DEAD-box RNA helicase OS=Schistosoma mansoni GN=vlg1 PE=2 SV=1	15	71.08	0.434019	0.362491	0.185962	1.13758	FALSE	19.759626410092	19.1945828845794	19.6039942120637	19.5025894823837	19.3959821177559	19.1017447211128
G4LVD1;G4LVD2	tr|G4LVD1|G4LVD1_SCHMA Uncharacterized protein OS=Schistosoma mansoni GN=Smp_033760.2 PE=4 SV=1;tr|G4LVD2|G4LVD2_SCHMA Uncharacterized protein OS=Schistosoma mansoni GN=Smp_033760.1 PE=4 SV=1	24	75.25	0.632256	0.199107	0.0757081	1.05388	FALSE	21.563627581111	21.6069695883658	21.4571018272615	21.4803161922535	21.4083448803478	21.5119134997611
G4LVE5	tr|G4LVE5|G4LVE5_SCHMA Arginine/serine-rich splicing factor, putative OS=Schistosoma mansoni GN=Smp_185230 PE=4 SV=1	10	23.244	0.254945	0.593554	0.323674	1.25151	FALSE	23.0257065219701	22.8244561160118	22.1983232092928	22.2051747051281	22.4489530923127	22.4233373884058
G4LVE7	tr|G4LVE7|G4LVE7_SCHMA ATP synthase f chain, mitochondrial-related OS=Schistosoma mansoni GN=Smp_140480 PE=4 SV=1	3	13.079	0.00118183	2.92744	-1.24724	2.37387	TRUE	20.8511238354995	20.8839951784773	20.3095544990132	21.8885093621459	22.0539689710173	21.8439099382732
G4LVF8	tr|G4LVF8|G4LVF8_SCHMA Uncharacterized protein OS=Schistosoma mansoni GN=Smp_066610.1 PE=4 SV=1	3	17.971	0.550388	0.259331	0.213628	1.1596	FALSE	19.1213462361354	19.0396565970505	18.1000330968707	18.6373350793543	18.7914512821206	18.191365012537
G4LVG1;G4LVG0	tr|G4LVG1|G4LVG1_SCHMA Eukaryotic peptide chain release factor subunit,putative OS=Schistosoma mansoni GN=Smp_066630.1 PE=4 SV=1;tr|G4LVG0|G4LVG0_SCHMA Eukaryotic peptide chain release factor subunit,putative OS=Schistosoma mansoni GN=Smp_066630.2 PE=4 SV=	9	49.598	0.444023	0.352595	-0.18287	1.13514	FALSE	18.555297556938	18.9090178326596	19.0162407962179	19.2130589059257	19.1127204333083	18.7033868464273
G4LVG4	tr|G4LVG4|G4LVG4_SCHMA Syntaxin, putative OS=Schistosoma mansoni GN=Smp_066670.1 PE=3 SV=1	2	33.405	0.143898	0.841944	-0.515028	1.42902	FALSE	17.6701290575162	17.4996882984382	17.3887235636931	17.5473385878321	18.639537958546	17.9167483515568
G4LVG5	tr|G4LVG5|G4LVG5_SCHMA Fumarate hydratase OS=Schistosoma mansoni GN=Smp_158240 PE=4 SV=1	2	54.596	0.000219157	3.65924	1.4319	2.69802	TRUE	17.0966225923702	17.3671250858169	16.9109642472158	15.7402205649448	15.6809086369645	15.6578809713654
G4LVH2	tr|G4LVH2|G4LVH2_SCHMA DEAD box ATP-dependent RNA helicase, putative OS=Schistosoma mansoni GN=Smp_013790 PE=3 SV=1	7	85.415	0.0183442	1.7365	1.01114	2.01551	FALSE	17.3555785068385	17.8465993898646	18.0481047317763	17.1628824780754	16.8268735682355	16.2271023086771
G4LVH6;G4LVH5	tr|G4LVH6|G4LVH6_SCHMA Non-specific serine/threonine protein kinase OS=Schistosoma mansoni GN=Smp_013840.1 PE=4 SV=1;tr|G4LVH5|G4LVH5_SCHMA Non-specific serine/threonine protein kinase OS=Schistosoma mansoni GN=Smp_013840.2 PE=4 SV=1	4	122.12	0.0792887	1.10079	-0.342424	1.26789	FALSE	17.2007363288287	17.0983784883113	17.0821919079257	17.5871983740226	17.3059623033062	17.5154190603867
G4LVH9	tr|G4LVH9|G4LVH9_SCHMA Glutamate-cysteine ligase OS=Schistosoma mansoni GN=Smp_013860 PE=4 SV=1	11	50.442	0.000920661	3.0359	-1.19161	2.28407	TRUE	20.468039482456	20.6143049759932	20.2371286031476	21.8729782747869	21.5385582608505	21.4827534720847
G4LVI8	tr|G4LVI8|G4LVI8_SCHMA Adenylyl cyclase-associated protein OS=Schistosoma mansoni GN=Smp_014010 PE=3 SV=1	18	52.697	0.0229378	1.63945	1.05217	2.07364	FALSE	22.2035081721247	23.40991460661	23.2677643384074	21.8801424246214	21.8204158266823	22.0241264573783
G4LVJ6	tr|G4LVJ6|G4LVJ6_SCHMA DEAD box ATP-dependent RNA helicase, putative OS=Schistosoma mansoni GN=Smp_211330 PE=3 SV=1	4	51.728	0.0578737	1.23752	1.05127	2.07236	FALSE	18.3220062712902	17.258188710995	18.6760658719677	17.449116318688	16.454419565908	17.1989097660139
G4LVJ7	tr|G4LVJ7|G4LVJ7_SCHMA Uncharacterized protein OS=Schistosoma mansoni GN=Smp_210190 PE=4 SV=1	1	8.649	0.653656	0.184651	0.159485	1.11689	FALSE	21.0514745134306	20.8948432292803	19.9817872655589	20.4222890643461	20.8023330561111	20.2250291970723
G4LVJ9	tr|G4LVJ9|G4LVJ9_SCHMA Uncharacterized protein OS=Schistosoma mansoni GN=Smp_173960 PE=4 SV=1	3	34.554	0.315245	0.501351	-0.564103	1.47847	FALSE	17.3836470499188	19.1395127341939	17.6500246074181	18.105828303678	18.9142579282797	18.8454067146676
G4LVK0	tr|G4LVK0|G4LVK0_SCHMA AMP deaminase, putative OS=Schistosoma mansoni GN=Smp_004120 PE=4 SV=1	8	69.341	0.0144813	1.83919	-1.1866	2.27616	FALSE	17.1310719881045	17.5701663829842	16.3871456914786	18.571820323838	18.0479659128499	18.0284114527652
G4LVL0	tr|G4LVL0|G4LVL0_SCHMA Uncharacterized protein OS=Schistosoma mansoni GN=Smp_002380 PE=4 SV=1	3	30.846	0.467795	0.329944	-0.256566	1.19463	FALSE	17.6808475997181	18.5015975802545	18.7890361109987	18.4487930535419	18.8816716910262	18.410714913445
G4LVL4	tr|G4LVL4|G4LVL4_SCHMA Uncharacterized protein OS=Schistosoma mansoni GN=Smp_171520 PE=4 SV=1	1	70.78	0.962919	0.0164102	-0.0259106	1.01812	FALSE	16.5328746554904	16.0981569158777	14.4707619788912	15.7591002820769	15.624391669864	15.7960334112695
G4LVL5	tr|G4LVL5|G4LVL5_SCHMA Beta-parvin-related OS=Schistosoma mansoni GN=Smp_171530 PE=4 SV=1	2	44.084	0.905664	0.0430328	0.0729204	1.05184	FALSE	17.2471186904164	16.3698401618669	16.583832853606	17.2812349137583	17.3356741302728	15.3651214621935
G4LVL7;G4LVL8;G4LVL9	tr|G4LVL7|G4LVL7_SCHMA Ribosome-binding protein 1 (Ribosome receptor protein) (MRRp), putative OS=Schistosoma mansoni GN=Smp_171540.3 PE=4 SV=1;tr|G4LVL8|G4LVL8_SCHMA Ribosome-binding protein 1 (Ribosome receptor protein) (MRRp), putative OS=Schistosoma ma	10	86.734	0.0371822	1.42966	-0.507384	1.42147	FALSE	16.7819701726724	17.1947843762904	16.9248722430811	17.5829896902617	17.550533580229	17.2902544056093
G4LVM3	tr|G4LVM3|G4LVM3_SCHMA Ribosomal protein L19 OS=Schistosoma mansoni GN=Smp_171570 PE=3 SV=1	7	99.843	0.000532902	3.27335	3.36688	10.3165	TRUE	17.8859442540456	18.7794782151428	19.0520705168325	16.1050395060548	14.9881180890584	14.5237039411291
G4LVM8	tr|G4LVM8|G4LVM8_SCHMA Host cell factor (DHcf) OS=Schistosoma mansoni GN=Smp_090450 PE=4 SV=1	5	133.82	0.000829626	3.08112	1.71583	3.28485	TRUE	16.1206886097511	16.0625120781028	15.539338938245	13.7700495200521	14.2728824249109	14.5321256808221
G4LVM9	tr|G4LVM9|G4LVM9_SCHMA Uncharacterized protein OS=Schistosoma mansoni GN=Smp_122840 PE=4 SV=1	3	48.944	0.722452	0.141191	-0.188664	1.13971	FALSE	18.0992534239845	17.3992536560925	19.2221212378549	18.6803331968445	18.7110021179833	17.8952857813967
G4LVN0	tr|G4LVN0|G4LVN0_SCHMA Uncharacterized protein OS=Schistosoma mansoni GN=Smp_122830 PE=4 SV=1	4	125.71	0.0540724	1.26702	-0.753908	1.68635	FALSE	16.3906054550002	16.8539815372952	16.0356151688936	16.8594967857142	17.6696727843796	17.0127561032677
G4LVN3	tr|G4LVN3|G4LVN3_SCHMA Gh regulated tbc protein-1, putative OS=Schistosoma mansoni GN=Smp_001420 PE=4 SV=1	2	34.252	0.108687	0.963822	-0.972886	1.96276	FALSE	17.1198182179797	16.9909613835441	18.8322406095638	18.6551842433687	18.3874137782935	18.8190786944791
G4LVP0;G4LVN9	tr|G4LVP0|G4LVP0_SCHMA Uridine cytidine kinase I, putative OS=Schistosoma mansoni GN=Smp_062260.1 PE=4 SV=1;tr|G4LVN9|G4LVN9_SCHMA Uridine cytidine kinase I, putative OS=Schistosoma mansoni GN=Smp_062260.2 PE=4 SV=1	5	27.768	0.18133	0.74153	-0.361155	1.28445	FALSE	18.778789937563	18.9768702731668	18.3791040627558	19.3184589243438	18.7905187262021	19.1092504444771
G4LVP7	tr|G4LVP7|G4LVP7_SCHMA Uncharacterized protein OS=Schistosoma mansoni GN=Smp_155620 PE=4 SV=1	10	52.46	0.0128004	1.89278	0.69561	1.61957	FALSE	21.4960597303883	21.273027732435	21.0307686401272	20.458743696758	20.483601238597	20.7706824951562
G4LVR3	tr|G4LVR3|G4LVR3_SCHMA Ndr family, putative OS=Schistosoma mansoni GN=Smp_000320 PE=4 SV=1	5	24.764	0.760804	0.118727	-0.0847592	1.06051	FALSE	21.4075015754245	22.1824561067451	22.2648534504063	21.9995686870663	22.0403695890836	22.0691505365366
G4LVS4	tr|G4LVS4|G4LVS4_SCHMA Saposin containing protein OS=Schistosoma mansoni GN=Smp_000260 PE=4 SV=1	12	104.72	0.299879	0.523054	-0.235959	1.17769	FALSE	19.6556888268454	19.7853772498943	19.2583459971823	19.6312117624243	19.9523918163226	19.8236866056904
G4LVS7;G4LVS6	tr|G4LVS7|G4LVS7_SCHMA Fusion OS=Schistosoma mansoni GN=Smp_000240.2 PE=4 SV=1;tr|G4LVS6|G4LVS6_SCHMA RNA binding protein, putative OS=Schistosoma mansoni GN=Smp_000240.1 PE=4 SV=1	5	53.295	0.180716	0.743003	-0.527261	1.44119	FALSE	19.4887945531068	18.9725790292056	20.2027576118262	19.7775935597486	20.22969299066	20.2386287863447
G4LVU8	tr|G4LVU8|G4LVU8_SCHMA Filamin OS=Schistosoma mansoni GN=Smp_000100 PE=4 SV=1	100	251.42	0.422844	0.37382	-0.135283	1.09831	FALSE	24.3689808117333	24.2087765648576	24.112236610826	24.3750097351983	24.3198716874174	24.4009610576458
G4LVU9	tr|G4LVU9|G4LVU9_SCHMA F-actin capping protein alpha, putative OS=Schistosoma mansoni GN=Smp_118830 PE=3 SV=1	9	33.659	0.249368	0.603159	0.209699	1.15645	FALSE	21.2828050908983	21.2507738661406	20.9840130747547	20.9956799329169	20.979035840561	20.9137785046904
G4LVV0	tr|G4LVV0|G4LVV0_SCHMA Solute carrier family, putative OS=Schistosoma mansoni GN=Smp_167630 PE=4 SV=1	4	56.292	0.253983	0.595196	-0.966413	1.95398	FALSE	18.1591308633773	15.4680672486566	16.6962543591888	17.7035721350804	16.9089111655301	18.6102092919023
G4LVV4;D6BNU5	tr|G4LVV4|G4LVV4_SCHMA PwLAP aminopeptidase (M17 family) OS=Schistosoma mansoni GN=Smp_083870 PE=4 SV=1;tr|D6BNU5|D6BNU5_SCHMA Leucine aminopeptidase 2 OS=Schistosoma mansoni PE=2 SV=1	23	59.706	0.0919359	1.03651	-0.344323	1.26956	FALSE	22.6261895407635	22.7248490191597	23.0039288811827	23.1688168025919	23.0916661786223	23.12745448421
G4LVX7	tr|G4LVX7|G4LVX7_SCHMA Vacuolar protein sorting (Vps33), putative OS=Schistosoma mansoni GN=Smp_069670 PE=3 SV=1	1	73.425	0.195628	0.708569	-0.510537	1.42458	FALSE	14.2283307302282	14.5399056547273	15.4118518352993	15.2737408427469	14.9336085647957	15.5043487650443
G4LVY0;G4LVX9	tr|G4LVY0|G4LVY0_SCHMA Uncharacterized protein OS=Schistosoma mansoni GN=Smp_160000.1 PE=4 SV=1;tr|G4LVX9|G4LVX9_SCHMA Uncharacterized protein OS=Schistosoma mansoni GN=Smp_160000.2 PE=4 SV=1	2	221.71	0.338891	0.46994	-0.61462	1.53115	FALSE	14.2377697341222	16.1218438139649	15.8099572137322	16.7717205494912	15.4946907824866	15.7470187400629
G4LVY7	tr|G4LVY7|G4LVY7_SCHMA Uncharacterized protein Smp_210610 OS=Schistosoma mansoni GN=Smp_210610 PE=3 SV=1	8	60.138	0.251773	0.598991	-0.242665	1.18318	FALSE	20.4396718354935	20.2213350832984	20.3365149731773	20.5158852059571	20.843979186312	20.3656522704949
G4LVZ3	tr|G4LVZ3|G4LVZ3_SCHMA Lamin, putative OS=Schistosoma mansoni GN=Smp_159900.1 PE=4 SV=1	74	744.47	0.962898	0.0164196	-0.00789343	1.00549	FALSE	21.9671412465233	22.0084657846536	21.7845312711428	21.8672212295896	21.8611804819557	22.0554168916062
G4LW08	tr|G4LW08|G4LW08_SCHMA Actin, putative OS=Schistosoma mansoni GN=Smp_072870 PE=3 SV=1	12	42.515	0.0584635	1.23312	-0.702576	1.62741	FALSE	21.2366541961876	22.2380511760462	22.1001972664661	22.423729014108	22.5551944393323	22.7037079836246
G4LW12	tr|G4LW12|G4LW12_SCHMA Hsp90 co-chaperone (Tebp), putative OS=Schistosoma mansoni GN=Smp_072900.1 PE=4 SV=1	3	19.778	0.990966	0.00394132	-0.0020552	1.00143	FALSE	23.8093776835836	23.7196572183957	23.9608457567859	23.7838174053019	24.0202906892362	23.6919381740508
G4LW34	tr|G4LW34|G4LW34_SCHMA Tubulin beta chain,putative OS=Schistosoma mansoni GN=Smp_030730 PE=3 SV=1	3	46.066	0.561853	0.250377	-0.112114	1.08081	FALSE	24.2250928403143	23.9762382840787	24.3646331934961	24.1456548063139	24.3581402943431	24.3985101218759
G4LW37	tr|G4LW37|G4LW37_SCHMA Uncharacterized protein OS=Schistosoma mansoni GN=Smp_138760 PE=4 SV=1	6	29.339	0.126844	0.896731	0.311838	1.24129	FALSE	21.4015987990026	21.091469134278	21.1326613035968	20.7979921225629	21.0497856924021	20.8424366968567
G4LW38	tr|G4LW38|G4LW38_SCHMA Elongation factor 1-beta, putative OS=Schistosoma mansoni GN=Smp_030690 PE=3 SV=1	12	23.958	0.2895	0.538351	-0.228819	1.17187	FALSE	24.3682993308322	24.0838933718645	24.1574758092439	24.4921219199747	24.6408299394711	24.1631725595132
G4LW52;G4LW53	tr|G4LW52|G4LW52_SCHMA Tetraspanin, putative OS=Schistosoma mansoni GN=Smp_059530.2 PE=3 SV=1;tr|G4LW53|G4LW53_SCHMA Tetraspanin, putative OS=Schistosoma mansoni GN=Smp_059530.1 PE=3 SV=1	2	24.707	0.792878	0.100794	-0.133202	1.09673	FALSE	19.0317787120896	18.2071651486899	19.9884691991722	18.805887025738	19.627228938842	19.1939039816888
G4LW56	tr|G4LW56|G4LW56_SCHMA Similar to tetraspanin TE736 OS=Schistosoma mansoni GN=Smp_194960 PE=3 SV=1	2	20.687	0.0202826	1.69288	0.704363	1.62943	FALSE	19.5864402282079	19.7581332087232	19.5340582600359	18.5228831618168	19.1525324389173	19.0901271633661
G4LW62;G9HW09	tr|G4LW62|G4LW62_SCHMA Uncharacterized protein OS=Schistosoma mansoni GN=Smp_131810 PE=4 SV=1;tr|G9HW09|G9HW09_SCHMA Protein O-fucosyltransferase B OS=Schistosoma mansoni GN=POFucTB PE=2 SV=1	3	63.106	0.0519967	1.28402	-1.95249	3.87042	FALSE	17.2583672787604	14.4287061135782	14.4707619788912	17.8416515789518	16.9913033020253	17.1823540674715
G4LW63	tr|G4LW63|G4LW63_SCHMA Protein kinase OS=Schistosoma mansoni GN=Smp_131800 PE=4 SV=1	2	68.84	0.521667	0.282606	-0.476385	1.39125	FALSE	16.1419937088152	16.576401167637	18.3988578064226	17.3367974835265	16.7991992279671	18.4104103082014
G4LW67	tr|G4LW67|G4LW67_SCHMA DEAD box ATP-dependent RNA helicase, putative OS=Schistosoma mansoni GN=Smp_131770 PE=4 SV=1	2	92.644	0.298194	0.525502	-0.240941	1.18176	FALSE	13.921484919135	13.8313949960226	14.0864630222007	13.851286798177	14.2728824249109	14.4379955244441
G4LW68	tr|G4LW68|G4LW68_SCHMA Uncharacterized protein OS=Schistosoma mansoni GN=Smp_017450 PE=4 SV=1	4	38.214	0.962555	0.0165743	-0.0144448	1.01006	FALSE	20.7760795706306	20.0357572670983	19.9551995481697	20.5705637700193	20.2808369742333	19.9589701712552
G4LW75	tr|G4LW75|G4LW75_SCHMA Uncharacterized protein OS=Schistosoma mansoni GN=Smp_075770 PE=4 SV=1	8	29.422	0.0133855	1.87336	-0.92837	1.90312	FALSE	19.7075420565602	20.4652638059215	19.9573458988522	20.6669265382934	21.2249837394998	21.0233520341945
G4LW80	tr|G4LW80|G4LW80_SCHMA Hemoglobinase (C13 family) OS=Schistosoma mansoni GN=Smp_075800 PE=4 SV=1	2	49.094	0.000870852	3.06006	1.62994	3.09499	TRUE	20.5731215285136	21.3684271226793	20.7620530511559	19.5267052477597	19.1997530801327	19.0873351360839
G4LW91	tr|G4LW91|G4LW91_SCHMA Thimet oligopeptidase (M03 family) OS=Schistosoma mansoni GN=Smp_029500 PE=3 SV=1	31	77.687	0.25907	0.586583	-0.227812	1.17106	FALSE	22.8572566347306	22.8324563581511	22.4487189467065	22.8603664509162	22.9739447944808	22.9875552053798
G4LW94	tr|G4LW94|G4LW94_SCHMA Thimet oligopeptidase (M03 family) OS=Schistosoma mansoni GN=Smp_029470 PE=3 SV=1	1	78.268	0.00192714	2.71509	-1.05501	2.07773	TRUE	14.2052371104975	14.5011210631332	14.1192340875052	15.4284211777426	15.4835935452287	15.0785984917524
G4LWA6	tr|G4LWA6|G4LWA6_SCHMA Dendritic cell protein, putative OS=Schistosoma mansoni GN=Smp_029410 PE=4 SV=1	4	28.277	0.746399	0.127029	-0.0824955	1.05885	FALSE	20.0823857899582	20.2995680999337	20.2356348721694	20.4632441272171	20.572816645662	19.8290144225005
G4LWA8	tr|G4LWA8|G4LWA8_SCHMA ATP synthase subunit beta vacuolar,putative OS=Schistosoma mansoni GN=Smp_029390 PE=3 SV=1	15	54.23	0.126395	0.898271	0.310467	1.24011	FALSE	22.4862943275694	22.5438847128936	22.8222362452581	22.4044799515417	22.1847065736467	22.3318275521312
G4LWB9;G4LWC0	tr|G4LWB9|G4LWB9_SCHMA Arginine/serine-rich splicing factor, putative OS=Schistosoma mansoni GN=Smp_098890.1 PE=4 SV=1;tr|G4LWC0|G4LWC0_SCHMA Arginine/serine-rich splicing factor, putative OS=Schistosoma mansoni GN=Smp_098890.2 PE=4 SV=1	3	17.553	0.17081	0.767487	0.262626	1.19966	FALSE	22.3376706961871	22.2951784729223	22.0557432957732	21.9774356167751	21.8514508226758	22.0718281450277
G4LWC4;G4LWC5	tr|G4LWC4|G4LWC4_SCHMA Mps one binder kinase activator-like 3 (Mob1 homolog 3) (Mob3) OS=Schistosoma mansoni GN=Smp_105710.2 PE=4 SV=1;tr|G4LWC5|G4LWC5_SCHMA Mps one binder kinase activator-like 3 (Mob1 homolog 3) (Mob3) OS=Schistosoma mansoni GN=Smp_10571	4	21.938	0.620877	0.206994	-0.221984	1.16634	FALSE	18.8212223497857	19.6909522296724	18.0357410590127	18.9096144245458	19.025577776824	19.2786748867144
G4LWC6	tr|G4LWC6|G4LWC6_SCHMA U520, putative OS=Schistosoma mansoni GN=Smp_105700 PE=4 SV=1	8	250.71	0.0793702	1.10034	0.644266	1.56294	FALSE	15.7215364204016	15.0923840557054	15.869213799289	15.2921097048013	14.9516967760621	14.5065290971264
G4LWC8;G4LWC9	tr|G4LWC8|G4LWC8_SCHMA Dolichyl-diphosphooligosaccharide--protein glycosyltransferase subunit 1 OS=Schistosoma mansoni GN=Smp_105680.1 PE=3 SV=1;tr|G4LWC9|G4LWC9_SCHMA Dolichyl-diphosphooligosaccharide--protein glycosyltransferase subunit 1 OS=Schistosoma	18	66.262	0.600611	0.221407	0.111769	1.08055	FALSE	21.8590234895662	22.0712302833971	21.8322570815999	21.8259304699702	21.5289916521007	22.072282844656
G4LWD1	tr|G4LWD1|G4LWD1_SCHMA Uncharacterized protein OS=Schistosoma mansoni GN=Smp_181220 PE=4 SV=1	5	19.208	0.0166452	1.77871	-0.981128	1.97401	FALSE	21.8579364503838	21.0097343039096	20.9025012922277	22.0310131776315	22.332447368977	22.3500969240564
G4LWE0	tr|G4LWE0|G4LWE0_SCHMA RWD domain-containing protein, putative OS=Schistosoma mansoni GN=Smp_022150 PE=4 SV=1	3	67.264	0.0368848	1.43315	-1.35679	2.56114	FALSE	14.2283307302282	15.4937113037022	14.4707619788912	16.5353032310502	15.1852518548	16.5426052325349
G4LWE6	tr|G4LWE6|G4LWE6_SCHMA Sortilin OS=Schistosoma mansoni GN=Smp_179360 PE=4 SV=1	4	130.83	0.794931	0.0996707	0.0492302	1.03471	FALSE	14.6406836743185	14.5011210631332	14.4707619788912	14.359548468062	14.7373868667341	14.3679408897548
G4LWE8	tr|G4LWE8|G4LWE8_SCHMA Rab6-interacting protein 2/elks/erc/cast,putative OS=Schistosoma mansoni GN=Smp_197770 PE=4 SV=1	4	185.74	0.200097	0.69876	0.519431	1.43339	FALSE	16.2285905105655	15.1984868099853	16.0192246546567	15.5137256904907	14.7878046694398	15.5864796433982
G4LWG0	tr|G4LWG0|G4LWG0_SCHMA Uncharacterized protein OS=Schistosoma mansoni GN=Smp_006970 PE=4 SV=1	2	41.489	0.632609	0.198865	0.12074	1.08729	FALSE	17.3465721189274	17.3971538812575	16.6710571859081	17.0543570737911	17.0129999883636	16.9852050486609
G4LWG5;C5J9R9	tr|G4LWG5|G4LWG5_SCHMA Tyrosine-protein kinase OS=Schistosoma mansoni GN=Smp_006920 PE=3 SV=1;tr|C5J9R9|C5J9R9_SCHMA Tyrosine-protein kinase OS=Schistosoma mansoni GN=tk6 PE=2 SV=1	6	54.904	0.00201646	2.69541	0.847177	1.79898	FALSE	18.7971190251584	18.8416813984965	18.7700721160481	17.9440382050262	18.1192716071577	17.8040327294478
G4LWI2	tr|G4LWI2|G4LWI2_SCHMA Heat shock protein HSP60, putative OS=Schistosoma mansoni GN=Smp_008545 PE=3 SV=1	31	59.554	0.00454082	2.34287	-0.682938	1.60541	FALSE	25.1091042719742	25.1459190654731	25.2183369988887	25.7646371112362	25.791517315309	25.966018578736
G4LWI3	tr|G4LWI3|G4LWI3_SCHMA Aldehyde dehydrogenase,putative OS=Schistosoma mansoni GN=Smp_050390 PE=3 SV=1	28	53.762	0.00550505	2.25924	-0.732742	1.66179	FALSE	26.8340686713198	27.2300201963143	27.0756346395635	27.7311286233836	27.7865198795231	27.8203009224249
G4LWI9;G4LWI7;G4LWI8;G4LWI6	tr|G4LWI9|G4LWI9_SCHMA Vacuolar protein sorting-associated protein 29 OS=Schistosoma mansoni GN=Smp_050350.1 PE=3 SV=1;tr|G4LWI7|G4LWI7_SCHMA Vacuolar protein sorting-associated protein 29 OS=Schistosoma mansoni GN=Smp_050350.3 PE=3 SV=1;tr|G4LWI8|G4LWI8_S	2	16.166	0.193132	0.714145	0.548556	1.46262	FALSE	18.994843166131	18.9929490234097	18.5870304958022	18.2885068443673	17.6273333999564	19.0133133822824
G4LWK0	tr|G4LWK0|G4LWK0_SCHMA 60S ribosomal protein L31, putative OS=Schistosoma mansoni GN=Smp_050280 PE=4 SV=1	1	14.113	0.396517	0.401738	0.280605	1.2147	FALSE	20.1522051454813	21.2122641738973	20.7035556128807	20.2212060350125	20.3479813548381	20.6570224713093
G4LWK2	tr|G4LWK2|G4LWK2_SCHMA Phosphorylase B kinase alpha, kpb1, putative OS=Schistosoma mansoni GN=Smp_149040 PE=4 SV=1	13	146.72	0.0109979	1.95869	-1.5928	3.01635	FALSE	16.2672659946175	16.3394604377314	17.4240392942194	18.6349544479892	17.5864387060656	18.5877852986404
G4LWK3	tr|G4LWK3|G4LWK3_SCHMA Uncharacterized protein OS=Schistosoma mansoni GN=Smp_050250 PE=4 SV=1	8	47.334	0.0435307	1.3612	-0.595885	1.5114	FALSE	19.0951735874502	19.1297903047607	18.9597303446857	19.8671281855058	19.8861892702757	19.2190315790705
G4LWK6	tr|G4LWK6|G4LWK6_SCHMA Complexin, putative OS=Schistosoma mansoni GN=Smp_050220 PE=4 SV=1	2	18.432	0.771275	0.112791	-0.141933	1.10338	FALSE	19.0209413076092	18.5822307096752	18.7584688858797	18.8005181281336	19.900752858743	18.0861701947498
G4LWK9	tr|G4LWK9|G4LWK9_SCHMA Nucleolar protein NOP56, putative OS=Schistosoma mansoni GN=Smp_148990 PE=4 SV=1	2	73.536	0.0594403	1.22592	0.879831	1.84016	FALSE	15.9225073061706	17.184037349237	17.047877785883	15.625951237958	16.1413159197724	15.747661910258
G4LWL6	tr|G4LWL6|G4LWL6_SCHMA NAD dehydrogenase, putative OS=Schistosoma mansoni GN=Smp_050080 PE=4 SV=1	2	49.727	0.00314187	2.50281	-1.48582	2.80077	TRUE	14.2283307302282	14.5011210631332	14.4707619788912	15.9580493246876	15.2859148141849	16.4137236633174
G4LWM1	tr|G4LWM1|G4LWM1_SCHMA FACT complex subunit SSRP1 OS=Schistosoma mansoni GN=Smp_148930 PE=3 SV=1	3	72.069	0.121165	0.916622	0.634683	1.5526	FALSE	17.7210308995403	17.0574305138823	16.6589233058182	16.8848651362086	16.5875844978787	16.0608872333428
G4LWM4	tr|G4LWM4|G4LWM4_SCHMA Casp, putative OS=Schistosoma mansoni GN=Smp_049990 PE=4 SV=1	3	81.04	0.297988	0.525801	1.3968	2.63317	FALSE	15.6582602217965	19.5441501960984	14.9072160116938	15.756305730093	15.6307972218604	14.5321256808221
G4LWP3	tr|G4LWP3|G4LWP3_SCHMA Uncharacterized protein OS=Schistosoma mansoni GN=Smp_148800 PE=4 SV=1	6	18.461	0.0642043	1.19244	-0.526184	1.44012	FALSE	22.63888019008	22.4324409573587	21.9079039176194	22.8609506089356	22.9353540802003	22.761473578667
G4LWP4	tr|G4LWP4|G4LWP4_SCHMA Laminin beta chain-related OS=Schistosoma mansoni GN=Smp_148790 PE=4 SV=1	31	196.58	0.0151988	1.81819	0.756114	1.68894	FALSE	20.391331224793	20.2823352555044	20.0200058113092	19.5550526238672	19.1304439699425	19.7398332903984
G4LWQ0	tr|G4LWQ0|G4LWQ0_SCHMA Uncharacterized protein OS=Schistosoma mansoni GN=Smp_198230 PE=4 SV=1	7	228.22	0.0111802	1.95155	-1.67906	3.20218	FALSE	14.5922004686969	16.1395366592864	14.4707619788912	16.8229689909067	16.6453954373228	16.7713020255104
G4LWQ1	tr|G4LWQ1|G4LWQ1_SCHMA Hypoxanthine-guanine phosphoribosyltransferase,putative OS=Schistosoma mansoni GN=Smp_168500 PE=4 SV=1	2	26.018	0.286995	0.542125	-1.46616	2.76285	FALSE	17.4295262735862	19.0282660781163	14.4707619788912	16.9794856706742	19.0384658786149	19.3090771217462
G4LWQ2;P09383	tr|G4LWQ2|G4LWQ2_SCHMA Hypoxanthine phosphoribosyltransferase OS=Schistosoma mansoni GN=Smp_103560 PE=3 SV=1;sp|P09383|HPRT_SCHMA Hypoxanthine-guanine phosphoribosyltransferase OS=Schistosoma mansoni GN=HGPRT PE=1 SV=1	14	28.037	0.639479	0.194174	0.0780484	1.05559	FALSE	22.8055366348506	23.047041196527	22.971597554365	22.7916822018336	22.8708449629005	22.9275030004288
G4LWQ3	tr|G4LWQ3|G4LWQ3_SCHMA Syntaxin, putative OS=Schistosoma mansoni GN=Smp_179930 PE=3 SV=1	2	31.913	0.331668	0.479296	0.576846	1.49158	FALSE	16.2654494108677	17.1559274479723	18.0620499232229	17.0305604540547	15.8228898978192	16.8994399267492
G4LWR6;C0MP97	tr|G4LWR6|G4LWR6_SCHMA Diaphanous, putative OS=Schistosoma mansoni GN=Smp_068720 PE=4 SV=1;tr|C0MP97|C0MP97_SCHMA Formin-homology protein SmDia OS=Schistosoma mansoni GN=SmDia PE=2 SV=1	7	119.42	0.273365	0.563258	0.499358	1.41358	FALSE	17.4340349601777	17.657885021691	16.5177059958603	16.3837060600062	16.3790506878595	17.3487948825076
G4LWS5	tr|G4LWS5|G4LWS5_SCHMA Uncharacterized protein OS=Schistosoma mansoni GN=Smp_113740 PE=4 SV=1	1	13.483	0.0375333	1.42558	-0.816009	1.76053	FALSE	18.8806322532686	18.6395621701656	17.8079215892535	19.3764812891728	19.2452274526438	19.1544329715115
G4LWS8	tr|G4LWS8|G4LWS8_SCHMA Protein phosphatase 1 regulatory subunit 12b (Myosin phosphatase targeting subunit 2), putative OS=Schistosoma mansoni GN=Smp_143370 PE=4 SV=1	2	121.32	0.960133	0.0176684	-0.0252585	1.01766	FALSE	14.2283307302282	15.6284557087505	14.4707619788912	14.439616992061	15.5329021209688	14.4308048049181
G4LWT1	tr|G4LWT1|G4LWT1_SCHMA ATP synthase delta chain, putative OS=Schistosoma mansoni GN=Smp_039000 PE=3 SV=1	6	22.778	0.000565489	3.24758	-0.990387	1.98672	FALSE	22.1739569403385	22.2534708163134	22.0912777366842	23.1399381110272	23.1658173861899	23.184112259021
G4LWV6	tr|G4LWV6|G4LWV6_SCHMA Uncharacterized protein OS=Schistosoma mansoni GN=Smp_041370 PE=4 SV=1	7	85.224	0.819591	0.086403	0.0510196	1.036	FALSE	20.1219932136075	20.0222449937466	19.6216378551269	19.875015587591	19.6614329562404	20.0763687052314
G4LWW0	tr|G4LWW0|G4LWW0_SCHMA 14-3-3 protein, putative OS=Schistosoma mansoni GN=Smp_041430.1 PE=3 SV=1	12	27.963	0.0825222	1.08343	0.37059	1.29288	FALSE	23.0856895654529	22.9018245242259	23.3012183704872	22.7512923045361	22.8082194955015	22.6174520048213
G4LWW1	tr|G4LWW1|G4LWW1_SCHMA Aspartyl-tRNA synthetase, putative OS=Schistosoma mansoni GN=Smp_041450 PE=4 SV=1	17	61.244	0.130657	0.883867	-0.367813	1.2904	FALSE	20.9132168418068	20.8688319142968	20.6236759504253	21.4513771488241	20.8815403239576	21.176245678455
G4LWW2	tr|G4LWW2|G4LWW2_SCHMA Tetraspanin, putative OS=Schistosoma mansoni GN=Smp_041460 PE=3 SV=1	3	30.43	0.00274897	2.56083	1.02953	2.04136	TRUE	20.367740276185	20.0533567805966	20.2366308646432	19.4845073392477	19.1687241483861	18.9159140724163
G4LWW7;G4LWW5;G4LWW6	tr|G4LWW7|G4LWW7_SCHMA Rna recognition motif (Rrm) domain containing protein, putative OS=Schistosoma mansoni GN=Smp_041480.1 PE=4 SV=1;tr|G4LWW5|G4LWW5_SCHMA Rna recognition motif (Rrm) domain containing protein, putative OS=Schistosoma mansoni GN=Smp_041	3	56.519	0.306226	0.513959	-0.485499	1.40007	FALSE	17.2106974388789	18.7734393308627	18.615831618572	18.7418493544129	18.7586384869394	18.5559779903138
G4LWX3	tr|G4LWX3|G4LWX3_SCHMA Ormdl proteins, putative OS=Schistosoma mansoni GN=Smp_210360 PE=4 SV=1	2	17.827	0.588472	0.230274	-0.375103	1.29693	FALSE	19.9941082941236	21.5800066218184	22.6209848653736	21.9746530512998	21.427267722369	21.9184868685344
G4LWX4	tr|G4LWX4|G4LWX4_SCHMA Ormdl proteins, putative OS=Schistosoma mansoni GN=Smp_210370 PE=4 SV=1	19	80.038	0.608308	0.215877	0.149173	1.10893	FALSE	20.6267139042926	20.9516447965134	20.5867571360687	20.7822392879193	20.0479659128499	20.8873914141789
G4LWX6	tr|G4LWX6|G4LWX6_SCHMA Uncharacterized protein OS=Schistosoma mansoni GN=Smp_041550 PE=4 SV=1	2	16.693	0.728541	0.137546	-0.0668931	1.04746	FALSE	19.8874823004885	19.6448391188018	20.0960874117043	19.8672212295896	19.9180771476954	20.0437896400758
G4LWX9	tr|G4LWX9|G4LWX9_SCHMA Splicing factor 3B subunit 3, 5 OS=Schistosoma mansoni GN=Smp_137430 PE=4 SV=1	8	118.9	0.733502	0.134599	0.166783	1.12255	FALSE	17.9171137803439	16.3559045350634	16.963284598625	17.1052288568206	16.3247390602634	17.3059873318739
G4LWY0;I0B503	tr|G4LWY0|G4LWY0_SCHMA S-methyl-5-thioadenosine phosphorylase OS=Schistosoma mansoni GN=Smp_028190 PE=3 SV=1;tr|I0B503|I0B503_SCHMA S-methyl-5-thioadenosine phosphorylase OS=Schistosoma mansoni PE=1 SV=1	9	32.661	0.00293678	2.53213	-1.29096	2.44692	TRUE	21.2128612204903	21.5960595605185	20.6773868533523	22.4757162337301	22.5639528633941	22.3195331835356
G4LWY1	tr|G4LWY1|G4LWY1_SCHMA Troponin I (TnI), putative OS=Schistosoma mansoni GN=Smp_028200 PE=4 SV=1	4	98.369	0.966337	0.0148713	0.0370717	1.02603	FALSE	14.2283307302282	16.058797469561	15.8775895967387	16.1874736121678	13.6875496088612	16.1784794810345
G4LWY6	tr|G4LWY6|G4LWY6_SCHMA HMG-CoA synthase OS=Schistosoma mansoni GN=Smp_198690 PE=4 SV=1	4	36.55	0.0111553	1.95252	-3.0235	8.13136	FALSE	14.2283307302282	14.5011210631332	16.2421957511607	16.4547741481782	18.9386234325436	18.6487392784714
G4LWY7	tr|G4LWY7|G4LWY7_SCHMA DUF814 domain protein OS=Schistosoma mansoni GN=Smp_028330 PE=4 SV=1	2	24.216	0.0740983	1.13019	-1.17724	2.26144	FALSE	17.3812278697409	19.2889565434818	19.3036024946593	19.7312148901496	19.9791040547051	19.7951937038591
G4LX00	tr|G4LX00|G4LX00_SCHMA Disulfide oxidoreductase, putative OS=Schistosoma mansoni GN=Smp_137540 PE=4 SV=1	12	76.125	0.00189218	2.72304	-2.96884	7.82906	TRUE	19.2518793219181	19.2520054073089	17.2619947648786	21.5750423768927	21.4536244789631	21.643730601827
G4LX03;G4LX02	tr|G4LX03|G4LX03_SCHMA Adenosylhomocysteinase OS=Schistosoma mansoni GN=Smp_028440.1 PE=3 SV=1;tr|G4LX02|G4LX02_SCHMA Adenosylhomocysteinase,putative OS=Schistosoma mansoni GN=Smp_028440.2 PE=4 SV=1	16	47.528	0.000800922	3.09641	-1.21577	2.32264	TRUE	21.0354922148887	21.385802324617	21.5668982604433	22.4598392719763	22.595308231966	22.5803428315353
G4LX23	tr|G4LX23|G4LX23_SCHMA Uncharacterized protein OS=Schistosoma mansoni GN=Smp_075420 PE=4 SV=1	17	35.552	0.000138549	3.8584	1.41531	2.66717	TRUE	24.5654362452506	24.6801757388481	24.8714982711906	23.3683691041635	23.2241206254801	23.2786980645862
G4LX25	tr|G4LX25|G4LX25_SCHMA Uncharacterized protein OS=Schistosoma mansoni GN=Smp_075400.1 PE=4 SV=1	8	35.869	7.02826e-05	4.15315	1.75329	3.37126	TRUE	21.8226717424161	21.4743622611409	21.602150302345	20.0528362353194	19.7657261196397	19.8207606326456
G4LX27	tr|G4LX27|G4LX27_SCHMA Uncharacterized protein OS=Schistosoma mansoni GN=Smp_162840 PE=4 SV=1	5	33.082	6.29606e-06	5.20093	5.17525	36.1331	TRUE	19.5216252934699	20.3617769786353	19.0733272663184	14.6259766897051	14.2728824249109	14.5321256808221
G4LX29	tr|G4LX29|G4LX29_SCHMA Uncharacterized protein OS=Schistosoma mansoni GN=Smp_075370 PE=4 SV=1	11	41.879	1.21953e-05	4.91381	2.13129	4.3811	TRUE	22.4501433366402	22.4592559927496	22.7026098343382	20.4532378107572	20.4389696877981	20.3259177950654
G4LX32	tr|G4LX32|G4LX32_SCHMA Uncharacterized protein OS=Schistosoma mansoni GN=Smp_075350 PE=4 SV=1	4	36.906	0.000567979	3.24567	0.975018	1.96567	FALSE	20.3615078501575	20.2933987150669	20.2877375156792	19.3823525409424	19.3504935293967	19.2847440253628
G4LX38	tr|G4LX38|G4LX38_SCHMA Vesicle docking protein P115, putative OS=Schistosoma mansoni GN=Smp_168660 PE=4 SV=1	4	105.73	0.295505	0.529434	-0.264658	1.20135	FALSE	16.550468621149	15.8318688653128	16.2275018125793	16.3163886694077	16.5489021623162	16.5385226558407
G4LX40;G4LX41	tr|G4LX40|G4LX40_SCHMA Cop9 complex subunit, putative OS=Schistosoma mansoni GN=Smp_085640.2 PE=4 SV=1;tr|G4LX41|G4LX41_SCHMA Cop9 complex subunit, putative OS=Schistosoma mansoni GN=Smp_085640.1 PE=4 SV=1	9	43.289	0.443291	0.353311	0.147323	1.10751	FALSE	19.6177874620514	19.8925559244735	20.0449810920461	19.7144529287825	19.7714248288953	19.6274786875932
G4LX53	tr|G4LX53|G4LX53_SCHMA 26S proteasome non-ATPase regulatory subunit 7 (M67 family) OS=Schistosoma mansoni GN=Smp_026630 PE=4 SV=1	5	40.243	0.0295986	1.52873	-0.802385	1.74398	FALSE	19.0883304598821	19.558000318759	20.0761954759395	20.5055214863378	20.2189888337883	20.4051711981168
G4LX57	tr|G4LX57|G4LX57_SCHMA 60S ribosomal protein L38, putative OS=Schistosoma mansoni GN=Smp_058720.1 PE=3 SV=1	2	9.5872	0.0526724	1.27842	-0.731397	1.66025	FALSE	19.4797774281538	20.4528019108074	19.7718080148897	20.8098522206884	20.7632565369272	20.3254690981934
G4LX66	tr|G4LX66|G4LX66_SCHMA Proteasome regulatory subunit-related OS=Schistosoma mansoni GN=Smp_058650 PE=4 SV=1	16	52.219	0.453814	0.343122	0.179445	1.13245	FALSE	20.6300835183304	20.9445587279792	21.2205489551289	20.5348112873922	20.7608779448723	20.9611670224733
G4LX70	tr|G4LX70|G4LX70_SCHMA Protein phosphatase 1 binding protein, putative OS=Schistosoma mansoni GN=Smp_153700 PE=4 SV=1	5	78.001	0.0227672	1.64269	-0.923331	1.89649	FALSE	18.6577962810736	18.1258104538481	17.6837180848537	18.8167386984788	19.0346115227213	19.3859688366015
G4LX81	tr|G4LX81|G4LX81_SCHMA Eukaryotic translation initiation factor 3 subunit B OS=Schistosoma mansoni GN=Smp_058460 PE=3 SV=1	16	76.711	0.0658034	1.18175	-0.356523	1.28034	FALSE	19.3743152113925	19.5538771776915	19.6350892565682	19.9343904032227	19.8643894791517	19.8340703065636
G4LX87	tr|G4LX87|G4LX87_SCHMA Clumping factor A (Fibrinogen-binding protein A) (Fibrinogen receptor A), putative OS=Schistosoma mansoni GN=Smp_194050 PE=4 SV=1	1	43.482	0.468748	0.329061	0.330011	1.25702	FALSE	21.152395161292	20.3070432204958	19.5420163611381	20.0800653496998	20.2327858312668	19.6985715857398
G4LX89	tr|G4LX89|G4LX89_SCHMA Cofilin, actophorin, putative OS=Schistosoma mansoni GN=Smp_120700.1 PE=3 SV=1	8	15.726	0.0722017	1.14145	-0.372425	1.29453	FALSE	23.9221410836356	24.1883226425184	24.3026754731247	24.5115239474557	24.5288518628422	24.490038863207
G4LX92	tr|G4LX92|G4LX92_SCHMA Uncharacterized protein OS=Schistosoma mansoni GN=Smp_167270 PE=4 SV=1	4	16.945	0.000914419	3.03885	-2.69022	6.45412	TRUE	17.7482395970787	19.4826023032368	18.7526320864223	21.1527045589112	21.4523474968187	21.4490839708108
G4LX93	tr|G4LX93|G4LX93_SCHMA Uncharacterized protein OS=Schistosoma mansoni GN=Smp_167280 PE=4 SV=1	5	8.931	2.83117e-05	4.54803	-3.82813	14.2031	TRUE	20.3325090908947	19.2436824637173	19.2182188275293	23.3017752375743	23.4963350665253	23.4806996986688
G4LX94	tr|G4LX94|G4LX94_SCHMA Uncharacterized protein OS=Schistosoma mansoni GN=Smp_083240 PE=4 SV=1	4	17.269	0.258173	0.588089	-0.738241	1.66814	FALSE	20.8997732706072	20.734706805269	19.8713058990268	21.7701739192693	21.9541279534318	19.9962074995554
G4LX99	tr|G4LX99|G4LX99_SCHMA Succinyl-CoA synthetase beta chain, putative OS=Schistosoma mansoni GN=Smp_167330 PE=4 SV=1	11	37.517	0.710701	0.148313	-0.0920476	1.06588	FALSE	21.7072144241008	21.4644880832048	21.9747907428518	21.4699685589239	21.8864947888431	22.0661725598674
G4LXB1	tr|G4LXB1|G4LXB1_SCHMA Elongation factor 1-gamma, putative OS=Schistosoma mansoni GN=Smp_083410 PE=4 SV=1	16	47.573	0.3379	0.471212	-0.183864	1.13592	FALSE	24.1103682024841	23.8686064051067	24.0974929292073	24.3945081066535	24.0604952597088	24.173057070512
G4LXB4	tr|G4LXB4|G4LXB4_SCHMA Uncharacterized protein OS=Schistosoma mansoni GN=Smp_097620 PE=4 SV=1	4	20.836	0.987288	0.00555609	-0.00677541	1.00471	FALSE	18.41671679283	19.4758434980941	17.9122738323781	18.6259204438995	18.7304857240118	18.4687541912353
G4LXB6	tr|G4LXB6|G4LXB6_SCHMA DEAD box ATP-dependent RNA helicase, putative OS=Schistosoma mansoni GN=Smp_097660 PE=4 SV=1	17	44.285	0.0460885	1.33641	0.492619	1.407	FALSE	22.0525269436467	22.5710536493349	22.1719799805677	21.8114004364481	21.8284267067142	21.6778762984337
G4LXC0	tr|G4LXC0|G4LXC0_SCHMA Uncharacterized protein OS=Schistosoma mansoni GN=Smp_097710 PE=4 SV=1	6	39.024	0.0104509	1.98085	0.616354	1.533	FALSE	18.0983068771769	18.2951717609802	18.010807676191	17.5483602279076	17.3943870982005	17.6124767779155
G4LXC4	tr|G4LXC4|G4LXC4_SCHMA Cold shock domain protein A, putative OS=Schistosoma mansoni GN=Smp_097750 PE=4 SV=1	3	19.686	0.848121	0.071542	0.0400899	1.02818	FALSE	20.3689399319558	20.3035774449158	20.2737353454624	20.06910587536	20.6099412980099	20.1469358034441
G4LXC5	tr|G4LXC5|G4LXC5_SCHMA Nuclease-related OS=Schistosoma mansoni GN=Smp_175840 PE=4 SV=1	3	42.86	0.226766	0.644423	-1.42591	2.68685	FALSE	17.7167884807872	14.5011210631332	18.5904236515156	18.8265718017864	17.7604176310162	18.4990872059038
G4LXC6	tr|G4LXC6|G4LXC6_SCHMA Nuclease-related OS=Schistosoma mansoni GN=Smp_175850 PE=4 SV=1	2	28.579	0.627294	0.202529	0.369635	1.29203	FALSE	17.160693394625	16.2842409758253	16.1759937372615	14.6259766897051	16.5316822840894	17.3543655489383
G4LXD0;Q27277;G4LXD2	tr|G4LXD0|G4LXD0_SCHMA Y box binding protein, putative OS=Schistosoma mansoni GN=Smp_097800.2 PE=4 SV=1;tr|Q27277|Q27277_SCHMA Y box binding protein, putative OS=Schistosoma mansoni GN=Smp_097800.1 PE=2 SV=1;tr|G4LXD2|G4LXD2_SCHMA Y box binding protein, pu	4	18.522	0.0538245	1.26902	0.514515	1.42851	FALSE	22.9945852969518	22.5921313334974	23.098777265659	22.5455053690624	22.4490762175243	22.1473674401928
G4LXD4	tr|G4LXD4|G4LXD4_SCHMA Ubiquitin thioesterase OS=Schistosoma mansoni GN=Smp_097810.1 PE=3 SV=1	4	31.024	0.119079	0.924165	-0.447031	1.36323	FALSE	18.670801304485	19.4770747292684	19.0242225318793	19.6067896247933	19.5403992770588	19.3660013800044
G4LXE8	tr|G4LXE8|G4LXE8_SCHMA Ryanodine receptor related OS=Schistosoma mansoni GN=Smp_163570 PE=4 SV=1	42	559.03	0.129623	0.887319	-0.939087	1.91731	FALSE	17.1896200800691	15.6815099439064	17.4440969465607	18.0419474233668	17.0981721247391	17.9923684402821
G4LXF1	tr|G4LXF1|G4LXF1_SCHMA Rab6, putative OS=Schistosoma mansoni GN=Smp_163580 PE=4 SV=1	11	23.256	0.711457	0.147851	-0.0743817	1.05291	FALSE	23.5471263199806	23.5160215252637	23.0690841246553	23.4858107922607	23.4283922411431	23.4411741330034
G4LXG0	tr|G4LXG0|G4LXG0_SCHMA Uncharacterized protein OS=Schistosoma mansoni GN=Smp_076990 PE=4 SV=1	1	59.925	0.859951	0.0655262	-0.119039	1.08601	FALSE	14.2283307302282	16.4701234549857	16.5827053443174	15.723986917262	15.9662833275238	15.9480054131541
G4LXG8	tr|G4LXG8|G4LXG8_SCHMA Uncharacterized protein OS=Schistosoma mansoni GN=Smp_004550.1 PE=4 SV=1	3	17.376	0.000381649	3.41834	-1.1678	2.24668	TRUE	20.1977198047337	20.1109857497061	20.0236456269268	21.3332857853616	21.3828939145938	21.1195566402287
G4LXH6	tr|G4LXH6|G4LXH6_SCHMA Red protein (Ik factor) (Cytokine ik), putative OS=Schistosoma mansoni GN=Smp_004480 PE=4 SV=1	1	66.921	0.702055	0.153629	-0.230048	1.17287	FALSE	14.2283307302282	16.0574051876697	16.1362842206481	15.4205300601202	15.4513860677522	16.2402483470982
G4LXH7;Q9GNF6	tr|G4LXH7|G4LXH7_SCHMA Peroxiredoxin, Prx3 OS=Schistosoma mansoni GN=Smp_004470.1 PE=4 SV=1;tr|Q9GNF6|Q9GNF6_SCHMA Thioredoxin peroxidase 3 OS=Schistosoma mansoni GN=TPx3 PE=2 SV=1	9	24.881	0.00178766	2.74772	-1.08984	2.1285	TRUE	23.9522844805465	23.5483406124492	23.4181526905447	24.7487694481777	24.8501740477094	24.5893409586726
G4LXI6	tr|G4LXI6|G4LXI6_SCHMA Uncharacterized protein OS=Schistosoma mansoni GN=Smp_004360.1 PE=4 SV=1	1	25.586	0.311105	0.507092	-0.914564	1.885	FALSE	14.2283307302282	17.234527426545	17.1254203243468	16.8287903326574	17.3394198444085	17.1637600138898
G4LXI7	tr|G4LXI7|G4LXI7_SCHMA Ubiquitin-conjugating enzyme E2 l, putative OS=Schistosoma mansoni GN=Smp_004350 PE=3 SV=1	6	18.205	0.0093344	2.02991	-0.635384	1.55335	FALSE	21.4208660722672	21.2007014247907	21.1653264943357	21.9298540421938	22.0041244692544	21.7590666102402
G4LXI8	tr|G4LXI8|G4LXI8_SCHMA ATP-binding cassette, sub-family E (Oabp),member, putative OS=Schistosoma mansoni GN=Smp_124460 PE=4 SV=1	5	61.936	0.169488	0.770862	0.595165	1.51065	FALSE	19.129502764632	18.1791574869927	19.2080228816225	18.597644248554	17.6964056328135	18.4371385153529
G4LXL2	tr|G4LXL2|G4LXL2_SCHMA Sorting nexin, putative OS=Schistosoma mansoni GN=Smp_167550 PE=4 SV=1	6	65.709	0.236034	0.627026	-0.434303	1.35126	FALSE	17.0044187354639	18.236094600083	17.7088405452398	18.03821683994	17.9972971030876	18.216749414712
G4LXM2;Q6IFU0;G4LX44;C4QR08;G4V6I5	tr|G4LXM2|G4LXM2_SCHMA KRAB-A domain-containing protein OS=Schistosoma mansoni GN=Smp_195120 PE=4 SV=1;tr|Q6IFU0|Q6IFU0_SCHMA Pol polyprotein OS=Schistosoma mansoni PE=2 SV=1;tr|G4LX44|G4LX44_SCHMA Uncharacterized protein OS=Schistosoma mansoni GN=Smp_1785	6	155.62	0.515145	0.28807	0.207253	1.15449	FALSE	18.1883851284941	19.0184120968658	18.0903138745356	17.9688073114226	18.3891397360496	18.31740470245
G4LXM5	tr|G4LXM5|G4LXM5_SCHMA Ubiquitinyl hydrolase 1 OS=Schistosoma mansoni GN=Smp_069960 PE=3 SV=1	9	102.56	0.231239	0.63594	-0.443853	1.36023	FALSE	17.92140166969	18.2820643522944	17.173437038156	17.934585768824	18.2545902015851	18.5192849818972
G4LXQ5	tr|G4LXQ5|G4LXQ5_SCHMA Uncharacterized protein OS=Schistosoma mansoni GN=Smp_045400 PE=4 SV=1	6	62.741	0.206954	0.684126	-0.257799	1.19565	FALSE	18.555335878076	18.3974040147673	18.563687381147	18.9839889935743	18.7585749054827	18.547261329575
G4LXQ9	tr|G4LXQ9|G4LXQ9_SCHMA Fimbrin, putative OS=Schistosoma mansoni GN=Smp_195040 PE=4 SV=1	1	14.257	0.000295705	3.52914	-1.62991	3.09494	TRUE	19.9773309280673	20.0161335229651	20.5202193525709	21.9778234554012	21.644802158487	21.7807988755706
G4LXR7;G4LXR6	tr|G4LXR7|G4LXR7_SCHMA Proliferation-associated protein 2G4, 38kDa (M24 family) OS=Schistosoma mansoni GN=Smp_150690.2 PE=4 SV=1;tr|G4LXR6|G4LXR6_SCHMA Proliferation-associated protein 2G4, 38kDa (M24 family) OS=Schistosoma mansoni GN=Smp_150690.1 PE=4 SV=	8	33.472	0.0942288	1.02582	1.47017	2.77054	FALSE	21.5566094766642	21.5074725386028	24.1320258214139	20.8442441595896	20.6475086220984	21.2938460002109
G4LXR9	tr|G4LXR9|G4LXR9_SCHMA NADH-cytochrome b5 reductase OS=Schistosoma mansoni GN=Smp_053230 PE=3 SV=1	17	33.936	0.0485902	1.31345	-0.552543	1.46667	FALSE	24.2889973272823	23.8376040230622	24.2751447232307	24.8640135639808	24.3913250395656	24.804037560582
G4LXS1;G4LXS0	tr|G4LXS1|G4LXS1_SCHMA Aldo-keto reductase, putative OS=Schistosoma mansoni GN=Smp_053220.2 PE=4 SV=1;tr|G4LXS0|G4LXS0_SCHMA Aldo-keto reductase, putative OS=Schistosoma mansoni GN=Smp_053220.1 PE=4 SV=1	16	32.492	0.011408	1.94279	0.583691	1.49868	FALSE	24.69037737914	24.6482798331254	24.8633098239192	24.0806372246648	24.278898798088	24.0913575349134
G4LXS6	tr|G4LXS6|G4LXS6_SCHMA Uncharacterized protein OS=Schistosoma mansoni GN=Smp_150640 PE=4 SV=1	10	45.414	5.40453e-05	4.26724	-1.89603	3.72188	TRUE	18.7465959587046	19.0165569588891	19.0734945029926	20.6606594142574	21.0265417876974	20.8375359773463
G4LXT2	tr|G4LXT2|G4LXT2_SCHMA 40S ribosomal protein S6 OS=Schistosoma mansoni GN=Smp_053130 PE=3 SV=1	1	28.748	9.49519e-05	4.0225	-3.02469	8.13806	TRUE	14.2283307302282	14.5011210631332	14.4707619788912	17.1221694559672	17.0262645354935	18.1258371417906
G4LXT7	tr|G4LXT7|G4LXT7_SCHMA ADP-ribosylation factor, arf, putative OS=Schistosoma mansoni GN=Smp_086900 PE=3 SV=1	3	20.165	0.0940632	1.02658	-0.414749	1.33307	FALSE	19.3338277535232	19.5492245150242	19.0291456735641	19.916518449175	19.5481630079633	19.6917641142037
G4LXV0	tr|G4LXV0|G4LXV0_SCHMA Rab, putative OS=Schistosoma mansoni GN=Smp_169460 PE=4 SV=1	6	22.235	0.672586	0.172252	0.0946683	1.06782	FALSE	20.9362802828186	20.8502220930414	20.4232740257374	20.6212056060275	20.8410547274715	20.4635110414461
G4LXV1	tr|G4LXV1|G4LXV1_SCHMA Rab-18, putative OS=Schistosoma mansoni GN=Smp_169470 PE=4 SV=1	3	22.704	0.229912	0.638438	-0.359133	1.28265	FALSE	19.0293804910114	18.1220012360874	18.4061796830721	18.8507335345761	19.0164339324031	18.7677922342177
G4LXV8	tr|G4LXV8|G4LXV8_SCHMA Actin-like protein 6, acl6 OS=Schistosoma mansoni GN=Smp_063040 PE=3 SV=1	5	45.541	0.644672	0.190661	0.109579	1.07891	FALSE	19.2921481815826	19.1381363736382	18.7765581547021	19.0226961570911	19.179046440208	18.67636402091
G4LXW3	tr|G4LXW3|G4LXW3_SCHMA High-density lipoprotein receptor (Hdl) OS=Schistosoma mansoni GN=Smp_170110 PE=4 SV=1	16	83.708	0.826306	0.0828592	0.0789089	1.05622	FALSE	19.4716988250416	19.3314660558782	18.2968382117859	19.0152086688521	19.0809098732802	18.7671579779934
G4LXW9	tr|G4LXW9|G4LXW9_SCHMA 5-AMP-activated protein kinase, beta subunit,putative OS=Schistosoma mansoni GN=Smp_170160 PE=4 SV=1	2	31.43	0.624846	0.204227	0.219987	1.16472	FALSE	16.3647214585536	17.6255375696798	17.8597810173741	17.3865131639872	16.9238437881063	16.8797225771718
G4LXX0	tr|G4LXX0|G4LXX0_SCHMA Uncharacterized protein OS=Schistosoma mansoni GN=Smp_170170 PE=4 SV=1	5	117.36	0.33295	0.477621	-0.598423	1.51406	FALSE	16.7501827112375	14.9554143801389	16.6427396917358	17.0234978770567	16.0389894858651	17.0811183052948
G4LXX4	tr|G4LXX4|G4LXX4_SCHMA Polypeptide N-acetylgalactosaminyltransferase OS=Schistosoma mansoni GN=Smp_005500 PE=3 SV=1	2	74.715	0.0984235	1.0069	-1.29777	2.45848	FALSE	14.2283307302282	16.0928042305518	15.6211803166567	16.9674539225879	15.5127472765226	17.355420844897
G4LXX5;G4LXX6	tr|G4LXX5|G4LXX5_SCHMA Cysteine synthase, putative OS=Schistosoma mansoni GN=Smp_125070.1 PE=4 SV=1;tr|G4LXX6|G4LXX6_SCHMA Cysteine synthase, putative OS=Schistosoma mansoni GN=Smp_125070.2 PE=4 SV=1	12	56.108	0.0335088	1.47484	0.518259	1.43223	FALSE	20.9502640391394	21.0868237668184	21.4210305443471	20.6668730883169	20.5301560361455	20.7063124227729
G4LXY2	tr|G4LXY2|G4LXY2_SCHMA Uncharacterized protein OS=Schistosoma mansoni GN=Smp_161510 PE=4 SV=1	5	63.968	0.332432	0.478297	0.239792	1.18082	FALSE	18.9116461339316	19.1222433904316	18.6244941877275	18.5603106176558	18.9570261158119	18.421671674214
G4LXY8	tr|G4LXY8|G4LXY8_SCHMA Adenylyl cyclase-associated protein, putative OS=Schistosoma mansoni GN=Smp_161550 PE=4 SV=1	2	44.307	0.117816	0.928797	0.536835	1.45079	FALSE	17.8482802852938	16.8144260364062	17.4248260042494	16.6949590047757	16.7791554226623	17.0029125931479
G4LXZ3	tr|G4LXZ3|G4LXZ3_SCHMA Rab15, 13, 10, 1, 35, 5, and, putative OS=Schistosoma mansoni GN=Smp_104670 PE=4 SV=1	4	23.904	0.0727228	1.13833	0.479183	1.39395	FALSE	21.6869381650403	21.6028540978823	21.0892804499976	20.9702633886289	20.8419551925216	21.1293065338696
G4LXZ9;G4LY00	tr|G4LXZ9|G4LXZ9_SCHMA UDP-N-acetylglucosamine--dolichyl-phosphate N-acetylglucosaminephosphotransferase OS=Schistosoma mansoni GN=Smp_051360.2 PE=4 SV=1;tr|G4LY00|G4LY00_SCHMA UDP-N-acetylglucosamine--dolichyl-phosphate N-acetylglucosaminephosphotransfera	1	52.392	0.023419	1.63043	2.47574	5.56254	FALSE	17.7957248191918	18.4303889677237	17.3341206895272	14.6259766897051	14.2728824249109	17.2341416923049
G4LY02	tr|G4LY02|G4LY02_SCHMA NIF3-like protein 1 OS=Schistosoma mansoni GN=Smp_051390 PE=3 SV=1	9	39.11	0.379624	0.420647	0.170681	1.12559	FALSE	19.9057369446892	19.6694683189341	20.0208443605664	19.536567459296	19.8185567226057	19.7288817080483
G4LY04	tr|G4LY04|G4LY04_SCHMA Cytoplasmic dynein light chain, putative OS=Schistosoma mansoni GN=Smp_051400 PE=4 SV=1	3	10.372	0.00133728	2.87378	2.16521	4.48532	TRUE	20.1774468306921	20.0787829819355	19.972027459154	17.0664015753721	18.1843338660128	18.481892048637
G4LY12	tr|G4LY12|G4LY12_SCHMA Uncharacterized protein OS=Schistosoma mansoni GN=Smp_212450 PE=4 SV=1	2	32.783	0.340564	0.467801	-0.286208	1.21943	FALSE	18.9623227851613	19.5536303118764	19.6005361547117	19.2518890390146	19.8563461359134	19.8668786717486
G4LY16	tr|G4LY16|G4LY16_SCHMA Disco-interacting protein 2 (Dip2), putative (Fragment) OS=Schistosoma mansoni GN=Smp_212570 PE=4 SV=1	2	72.259	0.0746881	1.12675	-0.447211	1.3634	FALSE	16.1865356650307	16.7262446209702	16.4158319777088	16.699230185853	16.9905455555974	16.9804704188435
G4LY21	tr|G4LY21|G4LY21_SCHMA DNA-(apurinic or apyrimidinic site) lyase OS=Schistosoma mansoni GN=Smp_051320 PE=3 SV=1	8	32.153	0.00147459	2.83133	1.49098	2.81081	TRUE	18.6228245223929	19.3969037043722	18.5980001345433	17.4646960630903	17.485331204212	17.1947493127583
G4LY32;G4LY33;G4LY31;G4LY34	tr|G4LY32|G4LY32_SCHMA Tar DNA-binding protein, putative OS=Schistosoma mansoni GN=Smp_051230.4 PE=4 SV=1;tr|G4LY33|G4LY33_SCHMA Tar DNA-binding protein, putative OS=Schistosoma mansoni GN=Smp_051230.2 PE=4 SV=1;tr|G4LY31|G4LY31_SCHMA Tar DNA-binding prote	4	34.816	0.00648498	2.18809	0.772855	1.70865	FALSE	20.962741793143	20.7968948843818	20.5741065665984	19.8392250966544	20.1842628631645	19.9916898974895
G4LY37;G4LY38	tr|G4LY37|G4LY37_SCHMA Importin subunit alpha OS=Schistosoma mansoni GN=Smp_051210.1 PE=3 SV=1;tr|G4LY38|G4LY38_SCHMA Importin subunit alpha OS=Schistosoma mansoni GN=Smp_051210.3 PE=3 SV=1	8	58.778	0.0845906	1.07268	-0.562844	1.47718	FALSE	21.5353965358256	21.1940934303764	22.0038923206972	22.1724169214284	21.8512645025917	22.3982327974403
G4LY48	tr|G4LY48|G4LY48_SCHMA Cell polarity protein OS=Schistosoma mansoni GN=Smp_146240 PE=4 SV=1	2	63.63	0.0308218	1.51114	1.65016	3.13868	FALSE	17.0310073057934	16.8602376873529	16.1986184086905	16.3343765377627	14.2728824249109	14.5321256808221
G4LY49	tr|G4LY49|G4LY49_SCHMA Alpha-l-fucosidase, putative OS=Schistosoma mansoni GN=Smp_146250 PE=4 SV=1	2	59.179	0.117999	0.928123	-1.64343	3.12409	FALSE	14.2283307302282	17.8252651117278	16.9918797051732	17.987006252644	17.943218185072	18.0455560587849
G4LY51	tr|G4LY51|G4LY51_SCHMA Uncharacterized protein OS=Schistosoma mansoni GN=Smp_044680 PE=4 SV=1	7	58.115	0.858303	0.0663592	-0.22121	1.16571	FALSE	18.6542940719223	14.7951607502878	18.8478048742259	18.6569936707568	16.6545815522493	17.6493130515623
G4LY63	tr|G4LY63|G4LY63_SCHMA Succinate dehydrogenase [ubiquinone] flavoprotein subunit, mitochondrial OS=Schistosoma mansoni GN=Smp_061230 PE=3 SV=1	32	71.427	0.0245714	1.60957	-0.638893	1.55713	FALSE	24.2424523801654	24.4177194516519	23.9024228443855	24.7326774447619	24.678651486943	25.0679439894823
G4LY73;G4LY72	tr|G4LY73|G4LY73_SCHMA Set, putative OS=Schistosoma mansoni GN=Smp_155060.1 PE=3 SV=1;tr|G4LY72|G4LY72_SCHMA Set, putative OS=Schistosoma mansoni GN=Smp_155060.2 PE=3 SV=1	7	26.653	0.0562922	1.24955	0.577488	1.49225	FALSE	24.2770654940636	24.2110017789843	23.5713213212134	23.2890695165927	23.5984421350273	23.4394127901371
G4LY81	tr|G4LY81|G4LY81_SCHMA Ubiquitin-activating enzyme E1b, putative OS=Schistosoma mansoni GN=Smp_166220 PE=4 SV=1	4	85.392	0.00247192	2.60697	-1.59274	3.01621	TRUE	15.0322854117343	15.6476259925316	14.4707619788912	16.6479020910115	16.7680809471733	16.5128990684082
G4LYA2	tr|G4LYA2|G4LYA2_SCHMA Cysteine and histidine-rich domain (Chord)-containing, zinc binding protein, putative OS=Schistosoma mansoni GN=Smp_020800 PE=4 SV=1	13	38.562	0.231295	0.635834	-0.240152	1.18112	FALSE	20.7307345903012	20.9815659355541	20.5796119172171	20.9526576365062	21.1305545208161	20.929157738491
G4LYA4	tr|G4LYA4|G4LYA4_SCHMA Dolichyl-diphosphooligosaccharide--protein glycosyltransferase subunit DAD1 OS=Schistosoma mansoni GN=Smp_020770 PE=3 SV=1	1	15.086	0.337249	0.47205	0.372335	1.29445	FALSE	20.9607178707136	19.9415087040716	20.0841021941898	20.2541677285953	19.4785146726452	20.1366398968859
G4LYB3	tr|G4LYB3|G4LYB3_SCHMA Sec31-related protein OS=Schistosoma mansoni GN=Smp_212490 PE=4 SV=1	5	197.68	0.360548	0.443037	-0.354757	1.27877	FALSE	16.4042351660654	16.0352783513723	15.3948215704162	16.6679523940187	15.7672722049247	16.4633805339566
G4LYB8;G4LYB6;G4LYB7	tr|G4LYB8|G4LYB8_SCHMA Heterogeneous nuclear ribonucleoprotein,putative OS=Schistosoma mansoni GN=Smp_056810.3 PE=4 SV=1;tr|G4LYB6|G4LYB6_SCHMA Heterogeneous nuclear ribonucleoprotein,putative OS=Schistosoma mansoni GN=Smp_056810.2 PE=4 SV=1;tr|G4LYB7|G4LY	6	41.934	0.391066	0.40775	-0.166333	1.1222	FALSE	21.4096757868109	21.3148771182971	21.0645340261381	21.5022899629937	21.5234362644583	21.2623583246367
G4LYC3;Q26593	tr|G4LYC3|G4LYC3_SCHMA Protein disulfide-isomerase OS=Schistosoma mansoni GN=Smp_056760 PE=3 SV=1;tr|Q26593|Q26593_SCHMA Protein disulfide-isomerase OS=Schistosoma mansoni PE=3 SV=1	30	54.16	0.586703	0.231582	-0.103456	1.07434	FALSE	24.7381069248677	24.6487395515901	24.5591189032755	24.5215344641061	24.7948151271114	24.9399847689753
G4LYC4	tr|G4LYC4|G4LYC4_SCHMA Bestrophin homolog (Fragment) OS=Schistosoma mansoni GN=Smp_179490 PE=3 SV=1	6	65.42	0.796861	0.0986176	-0.116893	1.0844	FALSE	19.2680331417758	18.4449340059441	19.1071028039539	19.4409128612204	18.1918404199672	19.5379960286982
G4LYD1	tr|G4LYD1|G4LYD1_SCHMA MEG-5 OS=Schistosoma mansoni GN=Smp_152580 PE=4 SV=1	1	8.8843	0.288043	0.540542	-0.406875	1.32581	FALSE	20.1929245468486	19.6587408303389	18.8947141888932	20.0212419031163	20.1388217858579	19.806941363842
G4LYD3;G4LYD4	tr|G4LYD3|G4LYD3_SCHMA Pyridoxine kinase OS=Schistosoma mansoni GN=Smp_164250.2 PE=4 SV=1;tr|G4LYD4|G4LYD4_SCHMA Pyridoxine kinase OS=Schistosoma mansoni GN=Smp_164250.1 PE=4 SV=1	2	36.891	0.615972	0.210439	0.241306	1.18206	FALSE	17.4899578389905	18.0592654807395	18.0145868782899	16.6189308102802	18.1187763462394	18.1021848515119
G4LYD9	tr|G4LYD9|G4LYD9_SCHMA Importin-alpha re-exporter (Chromosome segregation 1-like protein) OS=Schistosoma mansoni GN=Smp_128050 PE=4 SV=1	12	117.34	0.146907	0.832957	-1.37952	2.60181	FALSE	18.1973023902201	17.2301527307702	14.8679545105643	18.3532327679226	17.9055270467967	18.175200193106
G4LYE5	tr|G4LYE5|G4LYE5_SCHMA Uncharacterized protein OS=Schistosoma mansoni GN=Smp_152440 PE=4 SV=1	3	60.625	0.973586	0.0116256	0.0105392	1.00733	FALSE	15.9519621277472	16.8291864901837	16.4763793016527	16.7992898129919	16.3418493538631	16.0847710223377
G4LYE6	tr|G4LYE6|G4LYE6_SCHMA Proteasome subunit beta OS=Schistosoma mansoni GN=Smp_056500 PE=3 SV=1	4	27.78	0.12176	0.914496	0.362363	1.28553	FALSE	20.7613715556554	20.6401118729884	20.3068305326873	20.070237908294	20.4152684148056	20.1357188643759
G4LYF6	tr|G4LYF6|G4LYF6_SCHMA Phosphatidylcholine-sterol acyltransferase (Lecithin-cholesterol acyltransferase)/ Phospholipase A OS=Schistosoma mansoni GN=Smp_166500.1 PE=4 SV=1	5	46.242	0.0395989	1.40232	-1.42496	2.68507	FALSE	15.529851149345	17.1906337283805	17.4435794806151	17.7856891803453	18.0926343277139	18.5606216985819
G4LYF7	tr|G4LYF7|G4LYF7_SCHMA Troponin t, invertebrate, putative OS=Schistosoma mansoni GN=Smp_179810 PE=4 SV=1	15	37.437	0.180612	0.743254	-0.290669	1.22321	FALSE	27.2149891651948	27.2476860706099	26.9258161771283	27.2001212352615	27.4599252828609	27.600452316358
G4LYF8	tr|G4LYF8|G4LYF8_SCHMA ADP-ribosylation factor family OS=Schistosoma mansoni GN=Smp_000730 PE=3 SV=1	6	20.114	0.659719	0.180641	0.173276	1.12762	FALSE	21.4740825652588	21.2724823673891	20.39344238689	20.5173681481769	20.7186866350947	21.3841258189929
G4LYG1	tr|G4LYG1|G4LYG1_SCHMA Uncharacterized protein OS=Schistosoma mansoni GN=Smp_000700 PE=4 SV=1	4	89.538	0.169568	0.770656	-1.05301	2.07486	FALSE	17.207872348933	14.7014194057433	16.1925540734227	17.606499830753	16.4319977793587	17.2223902316239
G4LYI3	tr|G4LYI3|G4LYI3_SCHMA Gdp-mannose pyrophosphorylase b, isoform 2 OS=Schistosoma mansoni GN=Smp_000510 PE=4 SV=1	4	45.99	0.590769	0.228582	-0.148772	1.10863	FALSE	18.9917881658832	18.8070415106715	18.4235583157049	18.6131947929671	18.7553922546423	19.3001167066552
G4LYI7	tr|G4LYI7|G4LYI7_SCHMA Eukaryotic translation initiation factor 3 subunit C OS=Schistosoma mansoni GN=Smp_000480 PE=3 SV=1	6	100.22	0.639758	0.193984	-0.278228	1.2127	FALSE	18.2647558840673	16.3773868999814	16.6060612212541	17.6117960903411	16.7559019508288	17.7151907432716
G4LYI8	tr|G4LYI8|G4LYI8_SCHMA ATP-dependent (S)-NAD(P)H-hydrate dehydratase OS=Schistosoma mansoni GN=Smp_000470 PE=3 SV=1	3	31.975	0.0271488	1.56625	-0.582713	1.49766	FALSE	18.9085295781997	18.9233672197983	19.422026861838	19.6541492650409	19.6273333999564	19.7205789918459
G4LYJ0	tr|G4LYJ0|G4LYJ0_SCHMA Uncharacterized protein OS=Schistosoma mansoni GN=Smp_000460 PE=4 SV=1	7	89.086	0.247046	0.607222	-1.13056	2.18944	FALSE	19.4649829240227	19.7219009708232	16.4328607987589	19.6699165808992	19.8876726119131	19.4538378801778
G4LYK6	tr|G4LYK6|G4LYK6_SCHMA V-type proton ATPase subunit G OS=Schistosoma mansoni GN=Smp_054220 PE=3 SV=1	3	13.674	0.239711	0.620311	-0.299255	1.23051	FALSE	20.3498456441728	20.9640256093424	20.9284670833197	21.106159470116	21.1646632360912	20.8692817776321
G4LYK7	tr|G4LYK7|G4LYK7_SCHMA NADH-ubiquinone oxidoreductase sgdh subunit,putative OS=Schistosoma mansoni GN=Smp_054200 PE=4 SV=1	2	24.033	0.010046	1.99801	-0.889638	1.85271	FALSE	18.5969217314678	19.3664097420596	18.9789927268133	19.7718398347069	19.8171531890874	20.0222449937466
G4LYN1	tr|G4LYN1|G4LYN1_SCHMA Neuroendocrine differentiation factor, putative OS=Schistosoma mansoni GN=Smp_032150 PE=3 SV=1	2	24.264	0.31782	0.497819	0.276714	1.21143	FALSE	19.8765893721965	19.3017345299866	19.4503779606854	19.6160102844017	18.964349526759	19.2182003609219
G4LYN4	tr|G4LYN4|G4LYN4_SCHMA ADP-ribosylation factor, arf, putative OS=Schistosoma mansoni GN=Smp_032180 PE=4 SV=1	4	20.377	0.969549	0.0134301	-0.00902944	1.00628	FALSE	23.0602945327617	22.7901239423331	22.4092084892936	22.9577347798065	22.7178284596517	22.6111520565687
G4LYN6	tr|G4LYN6|G4LYN6_SCHMA Lipopolysaccharide kinase,putative OS=Schistosoma mansoni GN=Smp_139630 PE=4 SV=1	1	71.256	0.553173	0.257139	-0.129558	1.09396	FALSE	15.6327154445397	16.2057718913327	15.8158603278629	15.8837176414691	16.0756881105877	16.0836167440257
G4LYN7	tr|G4LYN7|G4LYN7_SCHMA Uncharacterized protein OS=Schistosoma mansoni GN=Smp_032230 PE=4 SV=1	2	14.892	0.514785	0.288374	0.170144	1.12517	FALSE	19.3730113159258	19.2305458739468	18.763349467335	19.2639535570044	18.8598178279206	18.7327039216643
G4LYP2;G4LYP1	tr|G4LYP2|G4LYP2_SCHMA Mitochondrial processing peptidase beta-subunit (M16 family) OS=Schistosoma mansoni GN=Smp_009650.1 PE=3 SV=1;tr|G4LYP1|G4LYP1_SCHMA Mitochondrial processing peptidase beta-subunit (M16 family) OS=Schistosoma mansoni GN=Smp_009650.2	18	53.781	0.00591836	2.2278	-0.645137	1.56389	FALSE	23.3132064645239	23.332382094304	23.2646093395697	23.9147190163993	23.8519910148847	24.0788998666708
G4LYP9	tr|G4LYP9|G4LYP9_SCHMA Alanine aminotransferase, putative OS=Schistosoma mansoni GN=Smp_130540 PE=4 SV=1	15	53.992	0.0398326	1.39976	-0.633621	1.55145	FALSE	21.1379461303095	21.3183158869827	21.8614849610684	21.8784585824595	22.1526775987351	22.1874740912494
G4LYQ2	tr|G4LYQ2|G4LYQ2_SCHMA Prominin (Prom) protein, putative OS=Schistosoma mansoni GN=Smp_130520.1 PE=4 SV=1	13	80.566	0.0540304	1.26736	-0.502807	1.41697	FALSE	19.7068522174283	19.7737283882481	19.51559040246	20.4294902367325	19.845940499085	20.2291609316728
G4LYR6	tr|G4LYR6|G4LYR6_SCHMA Dynein light intermediate chain, putative OS=Schistosoma mansoni GN=Smp_130410 PE=4 SV=1	15	63.475	0.388629	0.410464	-0.18275	1.13505	FALSE	20.2111596423173	20.104320536598	20.5319300171675	20.2648719985785	20.6025215557366	20.5282653819209
G4LYR8	tr|G4LYR8|G4LYR8_SCHMA Vacuolar-sorting protein SNF8 OS=Schistosoma mansoni GN=Smp_198850 PE=3 SV=1	3	27.617	0.638571	0.194791	0.203829	1.15175	FALSE	18.7716828889844	18.1187281680417	19.5520126741458	18.4048838047438	19.0641075447934	18.3619465066057
G4LYS3	tr|G4LYS3|G4LYS3_SCHMA 39S ribosomal protein L19, mitochondrial, putative OS=Schistosoma mansoni GN=Smp_138670 PE=4 SV=1	1	34.662	0.016536	1.78157	-1.9722	3.92365	FALSE	14.2283307302282	16.256777719064	14.4707619788912	16.438435185701	16.9276942991753	17.5063264144847
G4LYT5	tr|G4LYT5|G4LYT5_SCHMA NADH dehydrogenase [ubiquinone] 1 alpha subcomplex subunit 12 OS=Schistosoma mansoni GN=Smp_082940 PE=3 SV=1	7	16.364	0.133373	0.874931	-0.468381	1.38356	FALSE	21.2649316403008	21.3385176206236	20.5710499037137	21.264660102413	21.7156603156182	21.5993229851462
G4LYU6;Q26606	tr|G4LYU6|G4LYU6_SCHMA Serpin, putative OS=Schistosoma mansoni GN=Smp_090080 PE=3 SV=1;tr|Q26606|Q26606_SCHMA Serpin (Fragment) OS=Schistosoma mansoni GN=SPI PE=2 SV=1	14	46.005	0.0608413	1.2158	-0.362553	1.2857	FALSE	24.230802623485	24.2693937594545	24.0889013421144	24.4548794017362	24.5731330112879	24.6487428652619
G4LYU9	tr|G4LYU9|G4LYU9_SCHMA Uncharacterized protein OS=Schistosoma mansoni GN=Smp_171300 PE=4 SV=1	3	126.9	0.725104	0.1396	-0.143442	1.10454	FALSE	18.8074524044536	18.440619853762	17.3956065358334	18.5059876642256	18.0998795157766	18.4681364251874
G4LYV3	tr|G4LYV3|G4LYV3_SCHMA Nuclear movement protein nudc, putative OS=Schistosoma mansoni GN=Smp_103320 PE=4 SV=1	10	37.485	0.0429917	1.36662	0.452099	1.36803	FALSE	22.2994592244732	22.2171610454517	22.4480204091111	21.7029779765621	22.0664786182139	21.8388884794731
G4LYV4	tr|G4LYV4|G4LYV4_SCHMA Signal recognition particle 9 kD protein,putative OS=Schistosoma mansoni GN=Smp_103310 PE=4 SV=1	2	14.173	0.0429067	1.36747	-2.762	6.78336	FALSE	14.2283307302282	18.2192707976774	14.4707619788912	18.0453394831207	18.4331056717737	18.7259199916188
G4LYW5	tr|G4LYW5|G4LYW5_SCHMA Ng,ng-dimethylarginine dimethylaminohydrolase,putative OS=Schistosoma mansoni GN=Smp_052560 PE=4 SV=1	2	3.3339	0.277442	0.556828	0.470573	1.38566	FALSE	22.7929567349278	22.3761259259257	23.8237282812282	22.4161333192439	22.7806394453162	22.3843197050048
G4LYW6	tr|G4LYW6|G4LYW6_SCHMA Ng,ng-dimethylarginine dimethylaminohydrolase,putative (Fragment) OS=Schistosoma mansoni GN=Smp_195000 PE=4 SV=1	6	19.384	0.0174401	1.75845	0.72069	1.64797	FALSE	22.0986816262172	21.7565156298705	22.4284862081279	21.2348274031593	21.4302644934813	21.4565204537615
G4LYW7	tr|G4LYW7|G4LYW7_SCHMA Uncharacterized protein OS=Schistosoma mansoni GN=Smp_150320 PE=4 SV=1	3	106.32	0.458159	0.338984	0.581464	1.49637	FALSE	16.4760170908614	14.8980782665096	16.0063880048634	16.6831687747919	14.2728824249109	14.6800413694938
G4LYW8	tr|G4LYW8|G4LYW8_SCHMA Uncharacterized protein OS=Schistosoma mansoni GN=Smp_198890 PE=4 SV=1	2	32.271	0.318316	0.497141	0.50949	1.42355	FALSE	17.0839273865303	18.2914619947301	18.1752043462995	16.8559753658297	17.0626662908864	18.1034835012582
G4LYX7;G4LYX8	tr|G4LYX7|G4LYX7_SCHMA ATP synthase subunit d, mitochondrial OS=Schistosoma mansoni GN=Smp_019750.2 PE=3 SV=1;tr|G4LYX8|G4LYX8_SCHMA Uncharacterized protein OS=Schistosoma mansoni GN=Smp_019750.1 PE=4 SV=1	7	19.958	0.000314587	3.50226	-1.48746	2.80395	TRUE	22.4384516875612	21.887115676955	21.981490231372	23.6326766151986	23.5691734458593	23.5675935042659
G4LYZ1	tr|G4LYZ1|G4LYZ1_SCHMA Glutamate dehydrogenase OS=Schistosoma mansoni GN=Smp_093820 PE=3 SV=1	17	52.403	0.00297249	2.52688	-0.907242	1.87546	FALSE	21.7842771893735	21.411478957152	21.8492869921005	22.6972322609843	22.4890244594879	22.5805120637282
G4LZ03	tr|G4LZ03|G4LZ03_SCHMA Dihydrolipoamide acetyltransferase component of pyruvate dehydrogenase complex OS=Schistosoma mansoni GN=Smp_066410 PE=3 SV=1	13	52.62	0.000131521	3.88101	-1.5637	2.95612	TRUE	20.5433879849372	20.5980740798198	20.7420273910979	22.018689237587	22.1351532933552	22.4207561812729
G4LZ21;G4LZ20	tr|G4LZ21|G4LZ21_SCHMA RNA and export factor binding protein, putative OS=Schistosoma mansoni GN=Smp_005260.1 PE=4 SV=1;tr|G4LZ20|G4LZ20_SCHMA RNA and export factor binding protein, putative OS=Schistosoma mansoni GN=Smp_005260.2 PE=4 SV=1	4	23.389	0.349681	0.456328	0.660075	1.58016	FALSE	19.7553126703424	18.6885422570735	20.7835945390938	19.335103248152	18.1421642112008	19.7699571748434
G4LZ24	tr|G4LZ24|G4LZ24_SCHMA Cytochrome C1, putative OS=Schistosoma mansoni GN=Smp_005290 PE=4 SV=1	10	33.544	0.000416443	3.38044	-1.17769	2.26214	TRUE	22.6351458901741	22.629796541601	22.6040086837073	23.5919466641734	23.8903083219162	23.9197656031304
G4LZ30;P15845	tr|G4LZ30|G4LZ30_SCHMA Calcium-binding protein, putative OS=Schistosoma mansoni GN=Smp_005350 PE=4 SV=1;sp|P15845|SM20_SCHMA 20 kDa calcium-binding protein OS=Schistosoma mansoni GN=SM20 PE=2 SV=2	11	57.938	0.617892	0.209087	-0.133884	1.09724	FALSE	24.2941014185071	23.709997818097	23.5064786844236	23.8648001310376	24.1747197123073	23.8727100507199
G4LZ37	tr|G4LZ37|G4LZ37_SCHMA Uncharacterized protein OS=Schistosoma mansoni GN=Smp_156790 PE=4 SV=1	2	9.47	0.000201694	3.69531	-4.52695	23.0541	TRUE	14.2283307302282	15.8046671377541	14.4707619788912	18.4583855255628	19.8039359308927	19.8222879676352
G4LZ44	tr|G4LZ44|G4LZ44_SCHMA Rna-binding protein 12 (Sh3/ww domain anchor protein in the nucleus) (Swan), putative OS=Schistosoma mansoni GN=Smp_129950.1 PE=4 SV=1	11	103.6	0.965796	0.0151144	0.0148043	1.01031	FALSE	18.2408419585183	18.7275423845759	17.5718393401443	17.912755074826	18.1687241483861	18.4143314124133
G4LZ47;G4LZ46	tr|G4LZ47|G4LZ47_SCHMA Uncharacterized protein OS=Schistosoma mansoni GN=Smp_164450.2 PE=4 SV=1;tr|G4LZ46|G4LZ46_SCHMA Uncharacterized protein OS=Schistosoma mansoni GN=Smp_164450.1 PE=4 SV=1	3	81.236	0.232419	0.633729	1.24797	2.37507	FALSE	16.407516434815	20.2004147491731	17.5640048232608	16.4697541069462	16.9440011946114	17.0142713989305
G4LZ54	tr|G4LZ54|G4LZ54_SCHMA Syntaxin-12, putative OS=Schistosoma mansoni GN=Smp_125640 PE=4 SV=1	5	26.822	0.125571	0.90111	-0.480848	1.39556	FALSE	20.2307276412838	20.9691671096864	20.3381398913356	20.8617680329962	21.3101980203244	20.8086118192084
G4LZ56	tr|G4LZ56|G4LZ56_SCHMA Heterogeneous nuclear ribonucleoprotein l (Hnrnp l), putative OS=Schistosoma mansoni GN=Smp_006440 PE=4 SV=1	10	76.414	0.0973034	1.01187	0.394702	1.31467	FALSE	19.3910091826678	19.7643139478707	19.6740637484986	19.0089308396859	19.1804947028716	19.4558564276662
G4LZ58	tr|G4LZ58|G4LZ58_SCHMA Developmentally regulated GTP-binding protein-related OS=Schistosoma mansoni GN=Smp_125670 PE=4 SV=1	1	39.05	0.0512201	1.29056	2.84433	7.18171	FALSE	17.4413523916342	15.9838364239596	20.2730073856248	16.3602044357215	14.2728824249109	14.5321256808221
G4LZ69	tr|G4LZ69|G4LZ69_SCHMA Proteasome subunit alpha type OS=Schistosoma mansoni GN=Smp_076230 PE=3 SV=1	9	29.736	0.46385	0.333622	-0.182164	1.13458	FALSE	21.7448748412625	22.4600045969657	21.9040693539449	22.1971472556127	22.1316595638802	22.3266354199217
G4LZ70	tr|G4LZ70|G4LZ70_SCHMA Cysteine desulfurylase, putative OS=Schistosoma mansoni GN=Smp_075470 PE=3 SV=1	11	49.463	0.0323752	1.48979	-0.445278	1.36158	FALSE	20.5981684579436	20.4559274908203	20.4653035192646	20.8521633053597	20.9044211866367	21.0986495395684
G4LZ71	tr|G4LZ71|G4LZ71_SCHMA Putative neutral sphingomyelinase OS=Schistosoma mansoni GN=Smp_162880 PE=4 SV=1	6	49.498	0.0359002	1.4449	0.829303	1.77683	FALSE	18.5222331774881	19.0436572846744	18.0284557189642	17.3955213009481	17.9193574569415	17.7915597093914
G4LZ73;G4LZ74;G4LZ75	tr|G4LZ73|G4LZ73_SCHMA Programmed cell death protein, putative OS=Schistosoma mansoni GN=Smp_067480.1 PE=4 SV=1;tr|G4LZ74|G4LZ74_SCHMA Programmed cell death protein, putative OS=Schistosoma mansoni GN=Smp_067480.3 PE=4 SV=1;tr|G4LZ75|G4LZ75_SCHMA Programme	3	15.854	0.483739	0.315389	0.127621	1.09249	FALSE	20.9632473304188	20.7955669598585	20.6256731553891	20.780412435179	20.6356139486947	20.5855985569868
G4LZ93	tr|G4LZ93|G4LZ93_SCHMA Oligosaccharyl transferase, putative OS=Schistosoma mansoni GN=Smp_158600 PE=4 SV=1	7	87.94	0.972332	0.0121856	0.0171168	1.01194	FALSE	18.0465211893653	19.2002427164554	19.2572912789518	18.0862336324046	18.9707580313823	19.3957131038492
G4LZ98;G4LZ99	tr|G4LZ98|G4LZ98_SCHMA Nitrilase-related OS=Schistosoma mansoni GN=Smp_120080.1 PE=4 SV=1;tr|G4LZ99|G4LZ99_SCHMA Nitrilase-related OS=Schistosoma mansoni GN=Smp_120080.2 PE=4 SV=1	4	31.047	0.666375	0.176281	0.237645	1.17907	FALSE	17.6342981033954	19.262946137123	18.9210051306386	18.3739165438395	17.7302587908678	19.0011381017212
G4LZA8	tr|G4LZA8|G4LZA8_SCHMA Uncharacterized protein OS=Schistosoma mansoni GN=Smp_121660 PE=4 SV=1	4	24.804	0.00335955	2.47372	-1.30749	2.47511	TRUE	19.6172736098695	20.058047702861	19.7460897944022	20.7727838280519	21.6263232922078	20.9447838076528
G4LZB1	tr|G4LZB1|G4LZB1_SCHMA Translocon-associated protein, gamma subunit,putative OS=Schistosoma mansoni GN=Smp_074700 PE=4 SV=1	1	20.323	0.378404	0.422045	-1.65166	3.14194	FALSE	20.8466685364241	20.7565156298705	14.4707619788912	20.2201136634597	20.1443070932002	20.6644922470783
G4LZC4	tr|G4LZC4|G4LZC4_SCHMA Linker histone H1 OS=Schistosoma mansoni GN=Smp_162370 PE=3 SV=1	2	18.026	0.00499822	2.30118	1.7529	3.37036	TRUE	21.6920884704685	20.9602209201247	20.6537204293678	19.1570492256384	20.0221125878137	18.868160826336
G4LZC5	tr|G4LZC5|G4LZC5_SCHMA Uncharacterized protein OS=Schistosoma mansoni GN=Smp_074590 PE=4 SV=1	2	16.88	0.580153	0.236458	-0.13983	1.10178	FALSE	22.131149119011	21.5883019420157	21.4631776881264	21.7509645825861	22.0927856408443	21.7583686686747
G4LZD0	tr|G4LZD0|G4LZD0_SCHMA Citrate synthase OS=Schistosoma mansoni GN=Smp_204770 PE=3 SV=1	18	44.544	0.00951236	2.02171	-0.715652	1.64222	FALSE	24.7857886562911	24.8571721082587	25.1801406753278	25.5320079623684	25.5974982353767	25.8405498490009
G4LZE0	tr|G4LZE0|G4LZE0_SCHMA Rab11, putative OS=Schistosoma mansoni GN=Smp_173990 PE=4 SV=1	9	104.86	0.251695	0.599125	0.387764	1.30836	FALSE	20.4548500875722	21.0035859224092	20.3120371149295	20.4197537943133	19.6962064709917	20.4912195220945
G4LZE5	tr|G4LZE5|G4LZE5_SCHMA Uncharacterized protein OS=Schistosoma mansoni GN=Smp_125130 PE=4 SV=1	1	50.247	0.00292888	2.5333	1.14927	2.21802	TRUE	15.5575414595091	15.3078737692215	16.0133786103759	14.6259766897051	14.2728824249109	14.5321256808221
G4LZE7	tr|G4LZE7|G4LZE7_SCHMA Uncharacterized protein OS=Schistosoma mansoni GN=Smp_125120.1 PE=4 SV=1	3	33.959	0.417685	0.379151	-0.988856	1.98461	FALSE	14.5177562913341	17.3849952789119	14.7834037118251	17.1944318184457	17.9261666497158	14.5321256808221
G4LZG1	tr|G4LZG1|G4LZG1_SCHMA Short chain dehydrogenase,putative OS=Schistosoma mansoni GN=Smp_076580 PE=4 SV=1	7	38.391	0.0300065	1.52278	-0.623145	1.54023	FALSE	19.118781352159	19.6261780179246	19.7820603916854	20.1056074838128	20.081392885871	20.2094532602554
G4LZH2	tr|G4LZH2|G4LZH2_SCHMA Dystrophin-like protein OS=Schistosoma mansoni GN=Smp_076500 PE=4 SV=1	1	235.35	4.24498e-05	4.37212	1.76342	3.39503	TRUE	20.1475101489007	20.3766969259713	20.3370955112081	18.601653884044	18.3737388413964	18.5956361916168
G4LZI3	tr|G4LZI3|G4LZI3_SCHMA Universal stress protein G, putative OS=Schistosoma mansoni GN=Smp_076400 PE=4 SV=1	7	20.276	0.00277662	2.55648	-1.74252	3.3462	TRUE	21.3212853292846	20.8925381792562	20.0713189126571	22.6766746948079	22.6480664673347	22.187967818275
G4LZI9	tr|G4LZI9|G4LZI9_SCHMA Uncharacterized protein OS=Schistosoma mansoni GN=Smp_160560 PE=4 SV=1	13	79.512	0.22704	0.643898	0.294025	1.22606	FALSE	21.4851381406074	21.572494294347	21.7169102611611	20.9208727757677	21.5250257021419	21.4465690917681
G4LZJ3	tr|G4LZJ3|G4LZJ3_SCHMA Uncharacterized protein OS=Schistosoma mansoni GN=Smp_070640 PE=4 SV=1	9	106.53	0.308049	0.51138	-0.237911	1.17928	FALSE	18.5146457182693	18.253222078171	18.7261057201322	18.9981801389222	18.6719026593627	18.5376241761178
G4LZJ4	tr|G4LZJ4|G4LZJ4_SCHMA Uncoordinated protein 112 (Mitogen inducible mig-2 protein like) OS=Schistosoma mansoni GN=Smp_070630 PE=4 SV=1	2	15.192	0.335122	0.474798	0.445031	1.36134	FALSE	20.1212168058171	18.8093743861612	19.419397724236	19.0608800990597	18.4446518963243	19.5093636683242
G4LZJ7	tr|G4LZJ7|G4LZJ7_SCHMA Ankyrin repeat-containing, putative OS=Schistosoma mansoni GN=Smp_212250 PE=4 SV=1	2	36.558	0.0419649	1.37711	-0.493039	1.40741	FALSE	17.0247104530902	17.1124644286004	17.3847756427147	17.6778740087933	17.8520021891398	17.471190161693
G4LZK0	tr|G4LZK0|G4LZK0_SCHMA Transaldolase OS=Schistosoma mansoni GN=Smp_070600 PE=4 SV=1	21	37.763	0.0506687	1.29526	0.61004	1.5263	FALSE	23.7079902751768	24.0724839832725	24.3781650899289	23.2198950898602	23.3582714186368	23.750351406912
G4LZM1	tr|G4LZM1|G4LZM1_SCHMA DEAD box ATP-dependent RNA helicase, putative OS=Schistosoma mansoni GN=Smp_096530 PE=4 SV=1	3	30.239	0.551148	0.258732	0.143522	1.1046	FALSE	19.2178086892948	19.4920258027163	19.0614598466547	18.8389025222504	19.4388308173774	19.0629946444634
G4LZM8	tr|G4LZM8|G4LZM8_SCHMA Annexin, putative (Fragment) OS=Schistosoma mansoni GN=Smp_155580 PE=4 SV=1	9	41.045	0.000347087	3.45956	-3.51	11.3924	TRUE	17.2816242524837	19.0595183965557	17.4829749519728	21.3867403523905	21.4988588846781	21.4685184959273
G4LZM9	tr|G4LZM9|G4LZM9_SCHMA Uncharacterized protein OS=Schistosoma mansoni GN=Smp_155570 PE=3 SV=1	1	49.154	0.657159	0.18233	0.193016	1.14315	FALSE	17.6849867261641	18.6939284989165	18.840125644901	18.1379882989245	17.7267530051355	18.7752502182307
G4LZN0	tr|G4LZN0|G4LZN0_SCHMA Serpin, putative OS=Schistosoma mansoni GN=Smp_155560 PE=3 SV=1	9	43.592	0.308747	0.510397	0.469157	1.3843	FALSE	21.1287690174117	20.3755546997962	21.8581721342598	21.0705611831911	20.5997736487728	20.2846886304821
G4LZN2	tr|G4LZN2|G4LZN2_SCHMA Serpin, putative OS=Schistosoma mansoni GN=Smp_062120 PE=3 SV=1	14	43.886	0.379999	0.420218	0.254065	1.19256	FALSE	22.3118744799692	21.6912990975815	22.4910417066895	22.1770592912013	21.8039898428318	21.7509697036025
G4LZN7;G4LZN8	tr|G4LZN7|G4LZN7_SCHMA Sulfide quinone reductase, putative OS=Schistosoma mansoni GN=Smp_062070.1 PE=4 SV=1;tr|G4LZN8|G4LZN8_SCHMA Sulfide quinone reductase, putative OS=Schistosoma mansoni GN=Smp_062070.2 PE=4 SV=1	19	50.922	0.115903	0.935905	-0.493697	1.40805	FALSE	22.8388188242522	21.9709749194189	22.6809813155569	23.0673859119251	22.8369392087734	23.0675415827927
G4LZP1;G4LZP2	tr|G4LZP1|G4LZP1_SCHMA Uncharacterized protein (Fragment) OS=Schistosoma mansoni GN=Smp_155510.2 PE=4 SV=1;tr|G4LZP2|G4LZP2_SCHMA Uncharacterized protein (Fragment) OS=Schistosoma mansoni GN=Smp_155510.1 PE=4 SV=1	1	22.436	0.254224	0.594783	0.24475	1.18489	FALSE	19.0687589737522	19.051498384354	18.7140346756919	18.5909667063076	18.9207502804842	18.5883239861969
G4LZP4	tr|G4LZP4|G4LZP4_SCHMA Uncharacterized protein OS=Schistosoma mansoni GN=Smp_096840 PE=4 SV=1	1	15.585	0.0767909	1.11469	-0.576438	1.49116	FALSE	19.1672025034986	19.9435827365664	19.2173614014205	19.8448112567042	20.2579675617875	19.9546824684716
G4LZQ3	tr|G4LZQ3|G4LZQ3_SCHMA Uncharacterized protein OS=Schistosoma mansoni GN=Smp_080670 PE=4 SV=1	5	15.527	0.170392	0.76855	-0.26889	1.20488	FALSE	21.1074309194046	21.4539447348974	21.2632659911466	21.4235866655189	21.5884611300819	21.6192652528564
G4LZR0	tr|G4LZR0|G4LZR0_SCHMA Uncharacterized protein OS=Schistosoma mansoni GN=Smp_080610 PE=4 SV=1	2	19.51	0.0753175	1.1231	-0.999972	1.99996	FALSE	18.0576558749619	18.316174232248	17.7385336922042	19.4361539670135	19.6602082286108	18.0159185907689
G4LZR2	tr|G4LZR2|G4LZR2_SCHMA Synaptotagmin, putative OS=Schistosoma mansoni GN=Smp_069120 PE=4 SV=1	5	46.918	0.00521683	2.28259	1.37086	2.58624	TRUE	19.5760331239335	20.1697873141784	19.8250904881643	18.8685232170803	17.8845296110247	18.7052919048881
G4LZT0	tr|G4LZT0|G4LZT0_SCHMA Uncharacterized protein OS=Schistosoma mansoni GN=Smp_174490 PE=4 SV=1	9	61.351	0.69992	0.154951	-0.0988896	1.07095	FALSE	21.6700936674182	21.4881087795433	21.138734413003	21.1837428238438	21.5941730139808	21.8156897551979
G4LZU4	tr|G4LZU4|G4LZU4_SCHMA Phosphatidylinositol transfer protein OS=Schistosoma mansoni GN=Smp_029310 PE=4 SV=1	5	27.48	0.684302	0.164752	-0.14947	1.10916	FALSE	20.1383299108591	20.0651973119395	20.9709805106024	20.0425737433268	20.6567495684918	20.9235950205018
G4LZU7	tr|G4LZU7|G4LZU7_SCHMA Uncharacterized protein OS=Schistosoma mansoni GN=Smp_138010 PE=4 SV=1	2	15.653	0.505393	0.296371	0.251083	1.1901	FALSE	19.4876504092757	19.3431995882658	18.4514078441611	18.9984350185301	19.1370865287365	18.3934887025864
G4LZY0	tr|G4LZY0|G4LZY0_SCHMA Cofilin OS=Schistosoma mansoni GN=Smp_195080 PE=3 SV=1	6	15.659	0.0611091	1.21389	-0.549733	1.46381	FALSE	23.6391513988488	23.5062119037727	22.8985146693975	23.8370415680607	23.9979099283553	23.8581259475593
G4LZY3	tr|G4LZY3|G4LZY3_SCHMA Proteasome subunit alpha type OS=Schistosoma mansoni GN=Smp_067890 PE=3 SV=1	7	23.257	0.487398	0.312117	0.1158	1.08358	FALSE	22.8026339891795	22.7685309771473	22.6178110376161	22.6628050849126	22.6667577735911	22.5120120869292
G4LZY4	tr|G4LZY4|G4LZY4_SCHMA Cdc37-related OS=Schistosoma mansoni GN=Smp_067900 PE=4 SV=1	11	45.374	0.61996	0.207637	0.0895286	1.06402	FALSE	21.8266064218904	21.9238274553115	22.171329033013	21.8078176628427	21.979035840561	21.8663235399361
G4LZZ3;G4LZZ2	tr|G4LZZ3|G4LZZ3_SCHMA Neuronal calcium sensor, putative OS=Schistosoma mansoni GN=Smp_158990 PE=4 SV=1;tr|G4LZZ2|G4LZZ2_SCHMA Neuronal calcium sensor, putative OS=Schistosoma mansoni GN=Smp_158980 PE=4 SV=1	3	21.958	0.0239211	1.62122	1.2434	2.36755	FALSE	17.5978522263474	18.3940987553134	17.9542916788799	15.9089565493206	17.144939608784	17.1621527331521
G4LZZ5;G4LZZ6;G4LZZ4;G4LZZ7;G4LZZ8	tr|G4LZZ5|G4LZZ5_SCHMA Ubiquitin conjugating enzyme E2, putative OS=Schistosoma mansoni GN=Smp_067980.3 PE=3 SV=1;tr|G4LZZ6|G4LZZ6_SCHMA Ubiquitin conjugating enzyme E2, putative OS=Schistosoma mansoni GN=Smp_067980.4 PE=3 SV=1;tr|G4LZZ4|G4LZZ4_SCHMA Ubiqu	3	12.679	0.131663	0.880537	-0.388939	1.30943	FALSE	21.9046695122292	21.674626880169	21.2037765542476	21.9803848798585	22.0365727625905	21.9329328850812
G4M005	tr|G4M005|G4M005_SCHMA Uncharacterized protein OS=Schistosoma mansoni GN=Smp_133310 PE=4 SV=1	2	14.03	0.587009	0.231356	-0.210427	1.15703	FALSE	19.4008952377106	18.171514128959	19.0890185315523	19.272409349742	19.2923677486944	18.7279313607419
G4M010	tr|G4M010|G4M010_SCHMA Low-density lipoprotein receptor (Ldl) OS=Schistosoma mansoni GN=Smp_020550 PE=4 SV=1	24	67.868	0.00756167	2.12138	0.878595	1.83858	FALSE	23.7631560679936	23.647228497651	23.8659774276296	22.9781250355999	22.4994059231538	23.1630470040507
G4M014	tr|G4M014|G4M014_SCHMA Uncharacterized protein OS=Schistosoma mansoni GN=Smp_164500 PE=4 SV=1	4	56.055	0.777099	0.109524	0.0651404	1.04619	FALSE	18.1823929770858	18.1590582849946	18.508598395247	18.5460605195149	17.9783671712086	18.130200839634
G4M018	tr|G4M018|G4M018_SCHMA Titin, putative OS=Schistosoma mansoni GN=Smp_126240 PE=4 SV=1	227	674.28	0.0909022	1.04143	-0.389958	1.31036	FALSE	22.0817873130596	21.8306283309892	22.1186493889549	22.6052563996406	22.1569954661227	22.4386869058245
G4M019	tr|G4M019|G4M019_SCHMA Uncharacterized protein OS=Schistosoma mansoni GN=Smp_126230 PE=4 SV=1	1	17.849	1.965e-07	6.70664	4.55478	23.503	TRUE	18.9709097664348	19.0012673357124	19.1231332146501	14.6259766897051	14.2728824249109	14.5321256808221
G4M023	tr|G4M023|G4M023_SCHMA Leukotriene A4 hydrolase (M01 family) OS=Schistosoma mansoni GN=Smp_007550 PE=4 SV=1	15	70.894	0.0231054	1.63629	-0.740754	1.67105	FALSE	20.5844324060577	20.8583309816498	20.3174603436644	21.6903596484728	21.2041251346021	21.0880019063538
G4M039	tr|G4M039|G4M039_SCHMA Neutral alpha-glucosidase ab (Glucosidase II alpha subunit) (Alpha glucosidase 2),putative OS=Schistosoma mansoni GN=Smp_018760 PE=3 SV=1	21	113.28	0.0929518	1.03174	-0.510526	1.42457	FALSE	20.457210535258	20.5901084930457	19.8296356626649	20.8941365867731	20.5852382294879	20.929157738491
G4M047	tr|G4M047|G4M047_SCHMA V-type proton ATPase subunit C OS=Schistosoma mansoni GN=Smp_211280 PE=3 SV=1	4	38.16	0.424883	0.371731	0.188629	1.13968	FALSE	20.6504066832791	21.2790810547843	20.7076019414917	20.6223637107077	20.7565865716405	20.692251428865
G4M048	tr|G4M048|G4M048_SCHMA Subfamily S1B unassigned peptidase (S01 family) OS=Schistosoma mansoni GN=Smp_211260 PE=4 SV=1	3	31.039	0.00590795	2.22856	-1.94239	3.84342	TRUE	15.6553456276429	14.5011210631332	14.4707619788912	17.168752635253	17.2192660707698	16.066379875817
G4M051;G4M050	tr|G4M051|G4M051_SCHMA 40S ribosomal protein S3a OS=Schistosoma mansoni GN=Smp_073880.1 PE=3 SV=1;tr|G4M050|G4M050_SCHMA 40S ribosomal protein S3a OS=Schistosoma mansoni GN=Smp_073880.2 PE=3 SV=1	9	29.287	0.683497	0.165264	0.260643	1.19801	FALSE	20.972532086967	19.8762988775183	22.1577551672348	21.3171653631907	20.3134478228118	20.5940426045883
G4M055	tr|G4M055|G4M055_SCHMA Rac-alpha serine/threonine-protein kinase (Ec 2.7.1.37) (Rac-pk-alpha)(Akt1 kinase) (Protein kinase b) (Pkb) (C-akt) (Thymoma viral proto-oncogene) OS=Schistosoma mansoni GN=Smp_073930.2 PE=4 SV=1	2	88.665	0.0116409	1.93401	-1.7834	3.44237	FALSE	14.2283307302282	16.1321489085491	15.6319699964738	17.2469204269916	17.224155159957	16.871582540731
G4M057	tr|G4M057|G4M057_SCHMA WD-repeat protein, putative OS=Schistosoma mansoni GN=Smp_073940 PE=4 SV=1	17	68.776	0.0966266	1.0149	0.325391	1.253	FALSE	21.4205505566747	21.3691924781566	21.1590362343969	21.1041871199319	20.9695225533708	20.8988971861167
G4M062	tr|G4M062|G4M062_SCHMA Uncharacterized protein OS=Schistosoma mansoni GN=Smp_074000 PE=4 SV=1	2	33.879	2.72277e-06	5.56499	-3.47723	11.1366	TRUE	14.2283307302282	14.5011210631332	14.4707619788912	18.0576222730866	18.0075528268241	17.5667395297355
G4M074	tr|G4M074|G4M074_SCHMA Protein kiaa0174, putative OS=Schistosoma mansoni GN=Smp_057650 PE=4 SV=1	5	37.631	0.0118973	1.92455	0.678035	1.59996	FALSE	21.8158101116563	21.4408382949829	21.9082164937317	21.0332332036594	21.1404085735751	20.957117593099
G4M080	tr|G4M080|G4M080_SCHMA Serine/threonine kinase OS=Schistosoma mansoni GN=Smp_153170 PE=4 SV=1	21	369.84	0.226457	0.645014	-1.44695	2.72631	FALSE	15.1577281849235	12.7827386898704	16.3372626628425	17.371425951286	14.7395532308064	16.5075927140841
G4M0B9;G4M0B8	tr|G4M0B9|G4M0B9_SCHMA Cle7, putative OS=Schistosoma mansoni GN=Smp_071960.1 PE=4 SV=1;tr|G4M0B8|G4M0B8_SCHMA Cle7, putative OS=Schistosoma mansoni GN=Smp_071960.2 PE=4 SV=1	11	27.86	0.89389	0.048716	-0.024788	1.01733	FALSE	21.4614087352237	21.4786241131281	21.3754688454951	21.5543304602869	21.6193377076074	21.2161976723124
G4M0D4	tr|G4M0D4|G4M0D4_SCHMA Cytoplasmic dynein intermediate chain 2, (Dhic-2), putative OS=Schistosoma mansoni GN=Smp_180470 PE=4 SV=1	7	66.052	0.570917	0.243427	-0.138428	1.1007	FALSE	19.677031199842	20.0948199850849	20.2782163326126	20.418293994099	20.0223773996795	20.0246793623944
G4M0E0;G4M0D9	tr|G4M0E0|G4M0E0_SCHMA Lysine--tRNA ligase OS=Schistosoma mansoni GN=Smp_104470.1 PE=3 SV=1;tr|G4M0D9|G4M0D9_SCHMA Lysine--tRNA ligase OS=Schistosoma mansoni GN=Smp_104470.2 PE=4 SV=1	20	71.517	0.00506999	2.29499	-0.723762	1.65148	FALSE	21.6598828404328	21.6443860590415	21.3524526885477	22.3471781826715	22.2564487280401	22.2243795349433
G4M0F3	tr|G4M0F3|G4M0F3_SCHMA Sap18, putative OS=Schistosoma mansoni GN=Smp_085480 PE=4 SV=1	2	26.52	0.000274635	3.56124	-2.66983	6.36356	TRUE	14.2303388710744	14.5011210631332	15.229003983713	17.0660773669524	17.0705754287862	17.8333130525662
G4M0F7;Q15ET5	tr|G4M0F7|G4M0F7_SCHMA Vacuolar ATP synthase subunit e, putative OS=Schistosoma mansoni GN=Smp_085520 PE=3 SV=1;tr|Q15ET5|Q15ET5_SCHMA Vacuolar ATP synthase subunit E-like protein OS=Schistosoma mansoni PE=2 SV=1	9	26.581	0.296144	0.528498	0.389174	1.30964	FALSE	22.6846845860322	21.6693026085816	21.6621776474359	21.3428187514483	21.908581706245	21.5972428889493
G4M0F8	tr|G4M0F8|G4M0F8_SCHMA Synapse-associated protein, putative OS=Schistosoma mansoni GN=Smp_085530 PE=4 SV=1	2	44.472	0.418603	0.378198	-0.627382	1.54476	FALSE	17.8355249445538	17.6132716501467	15.6960516216168	16.6255464635878	18.3964725384425	18.0049763423533
G4M0G4;G4M0G3;G4M0G1;G4M0G2;G4M0F9;G4M0G0	tr|G4M0G4|G4M0G4_SCHMA Myosin heavy chain, putative OS=Schistosoma mansoni GN=Smp_085540.6 PE=3 SV=1;tr|G4M0G3|G4M0G3_SCHMA Myosin heavy chain OS=Schistosoma mansoni GN=Smp_085540.3 PE=3 SV=1;tr|G4M0G1|G4M0G1_SCHMA Myosin heavy chain, putative OS=Schistoso	153	222.18	0.0453513	1.34341	-0.49295	1.40732	FALSE	27.2938143435801	27.2480111849867	26.9811838508008	27.6227133720744	27.4679222931375	27.9112223334045
G4M0I1	tr|G4M0I1|G4M0I1_SCHMA Ankyrin repeat-containing, putative OS=Schistosoma mansoni GN=Smp_166010 PE=4 SV=1	26	141.94	0.201577	0.69556	-0.292235	1.22454	FALSE	21.2905376455273	21.3811303397443	20.8735006241018	21.6156226492286	21.329587926721	21.4766641854337
G4M0I3	tr|G4M0I3|G4M0I3_SCHMA Erythrocyte membrane protein, putative OS=Schistosoma mansoni GN=Smp_166030 PE=4 SV=1	29	227.53	0.00021072	3.67629	-1.35705	2.56161	TRUE	20.6043859806881	20.8272902601207	20.9776976750226	22.2022272705448	22.1074629831911	22.1708358305954
G4M0I4	tr|G4M0I4|G4M0I4_SCHMA Uncharacterized protein OS=Schistosoma mansoni GN=Smp_081370 PE=4 SV=1	4	18.691	0.000373338	3.4279	-1.54288	2.91376	TRUE	22.1820455609709	21.817229454551	21.8696536487674	23.6907408600065	23.1837894215191	23.6230492413091
G4M0I5	tr|G4M0I5|G4M0I5_SCHMA Tumor protein d52, putative OS=Schistosoma mansoni GN=Smp_081380 PE=4 SV=1	3	28.296	0.720785	0.142195	0.0763929	1.05438	FALSE	18.3254258344901	18.5312148039922	18.3582984397696	18.6519474677112	18.2249377197853	18.1088750413563
G4M0J4	tr|G4M0J4|G4M0J4_SCHMA Alpha-mannosidase OS=Schistosoma mansoni GN=Smp_143430 PE=3 SV=1	1	140.68	0.923538	0.0345451	-0.0441881	1.0311	FALSE	14.2283307302282	15.7239009136332	15.5659238598811	15.4116363787832	14.8395046116701	15.3995788155595
G4M0K2	tr|G4M0K2|G4M0K2_SCHMA Uncharacterized protein OS=Schistosoma mansoni GN=Smp_143410 PE=4 SV=1	17	114.29	0.208511	0.680871	-0.320893	1.2491	FALSE	20.9099987942135	20.3112973925158	20.2418485739142	20.7610644689574	20.7733613642964	20.8913985656777
G4M0K4;G4M0K5	tr|G4M0K4|G4M0K4_SCHMA 60S ribosomal protein L10, putative OS=Schistosoma mansoni GN=Smp_013200.2 PE=4 SV=1;tr|G4M0K5|G4M0K5_SCHMA 60S ribosomal protein L10, putative OS=Schistosoma mansoni GN=Smp_013200.1 PE=4 SV=1	6	25.112	0.525873	0.279119	-0.244788	1.18492	FALSE	21.80521440691	20.9695877327516	22.2779442372343	22.2156628116557	21.7810894407217	21.7903571790722
G4M0L4	tr|G4M0L4|G4M0L4_SCHMA Uncharacterized protein OS=Schistosoma mansoni GN=Smp_129240 PE=4 SV=1	8	40.44	0.872446	0.0592612	-0.0351546	1.02467	FALSE	21.037962583713	21.5702218531205	21.5883184944904	21.3432201691028	21.4462416757293	21.5125049217399
G4M0L7	tr|G4M0L7|G4M0L7_SCHMA Tyrosine--tRNA ligase OS=Schistosoma mansoni GN=Smp_129210 PE=3 SV=1	6	116.06	0.0623487	1.20517	-1.07443	2.10589	FALSE	15.1344413323876	14.5011210631332	15.8433983994484	16.7913095923097	15.492490387141	16.4184438663064
G4M0M2	tr|G4M0M2|G4M0M2_SCHMA Uncharacterized protein OS=Schistosoma mansoni GN=Smp_174850 PE=4 SV=1	2	20.086	0.65126	0.186246	-0.144527	1.10537	FALSE	18.7816753941852	19.7200822500814	19.622019026373	19.2628223641279	19.7287666272299	19.5657672813349
G4M0M5;G4M0M6;G4M0M7	tr|G4M0M5|G4M0M5_SCHMA Adenosylhomocysteinase OS=Schistosoma mansoni GN=Smp_096020.2 PE=3 SV=1;tr|G4M0M6|G4M0M6_SCHMA Adenosylhomocysteinase OS=Schistosoma mansoni GN=Smp_096020.3 PE=3 SV=1;tr|G4M0M7|G4M0M7_SCHMA Adenosylhomocysteinase,putative OS=Schistos	8	63.085	0.814634	0.0890375	0.063354	1.04489	FALSE	19.2120349903203	18.9811154140339	18.6409503162961	19.1311082600244	18.4767765089072	19.0361539420659
G4M0M8	tr|G4M0M8|G4M0M8_SCHMA DNAj homolog subfamily A member, putative OS=Schistosoma mansoni GN=Smp_096010 PE=3 SV=1	8	50.224	0.0133959	1.87303	-0.717933	1.64482	FALSE	19.0473933366187	18.9813490353469	19.2241814773745	19.5770631777578	19.7003003540986	20.1293579457699
G4M0N7	tr|G4M0N7|G4M0N7_SCHMA Valine-tRNA ligase OS=Schistosoma mansoni GN=Smp_097590 PE=3 SV=1	12	134.76	0.583649	0.233848	-0.613961	1.53046	FALSE	17.5590099760911	14.5011210631332	17.3661471290109	18.6688494197877	15.9158153384118	16.6834964982201
G4M0P7;G4M0P8;G4M0P6	tr|G4M0P7|G4M0P7_SCHMA Cell division control protein 48 aaa family protein (Transitional endoplasmic reticulum atpase),putative OS=Schistosoma mansoni GN=Smp_018240.3 PE=3 SV=1;tr|G4M0P8|G4M0P8_SCHMA Cell division control protein 48 aaa family protein (Tra	38	88.808	0.311086	0.507119	-0.257842	1.19569	FALSE	23.0890850594445	22.5308044228087	22.707893737392	23.3314154485617	22.8263238870792	22.9435709246331
G4M0Q5	tr|G4M0Q5|G4M0Q5_SCHMA Uncharacterized protein OS=Schistosoma mansoni GN=Smp_098590 PE=4 SV=1	5	13.281	0.00364362	2.43847	-1.20509	2.30552	TRUE	22.062065569821	21.7266667212785	21.2747659935299	22.9975937448812	23.0609787096013	22.620198461677
G4M0S0;A9NI54;G4M0R9;G4M0S1;A9NI55	tr|G4M0S0|G4M0S0_SCHMA 26S protease regulatory subunit 6a, putative OS=Schistosoma mansoni GN=Smp_042270.3 PE=3 SV=1;tr|A9NI54|A9NI54_SCHMA 26S proteasome subunit ATPase 3 (Fragment) OS=Schistosoma mansoni GN=RPT5a PE=2 SV=1;tr|G4M0R9|G4M0R9_SCHMA 26S prot	13	45.456	0.946083	0.0240707	-0.0171236	1.01194	FALSE	20.7458405989987	20.9343380744352	21.4916154362193	20.9444792208463	21.2347869145302	21.0438987409221
G4M0T5;G4M0T4	tr|G4M0T5|G4M0T5_SCHMA Synaptosomal associated protein, putative OS=Schistosoma mansoni GN=Smp_043940.1 PE=4 SV=1;tr|G4M0T4|G4M0T4_SCHMA Synaptosomal associated protein, putative OS=Schistosoma mansoni GN=Smp_043940.2 PE=4 SV=1	7	26.757	0.317944	0.497649	0.42439	1.34201	FALSE	19.350640785218	18.779823628357	20.1903453290482	18.6816247107514	19.2205822193767	19.1454316832562
G4M0T7	tr|G4M0T7|G4M0T7_SCHMA DNAj homolog subfamily C member, putative OS=Schistosoma mansoni GN=Smp_043970 PE=4 SV=1	1	28.46	0.00398182	2.39992	0.968867	1.9573	FALSE	18.333760731958	17.690013227561	17.9831825076386	17.0749344322832	16.9281466255753	17.0972729370992
G4M0U4	tr|G4M0U4|G4M0U4_SCHMA Calbindin-32, putative OS=Schistosoma mansoni GN=Smp_137750 PE=4 SV=1	3	29.76	0.0961639	1.01699	-0.396624	1.31642	FALSE	18.7224991525518	19.1891608389816	19.2371286031476	19.4944203155167	19.5021380084754	19.3421028588086
G4M0V2	tr|G4M0V2|G4M0V2_SCHMA Transgelin OS=Schistosoma mansoni GN=Smp_086330.1 PE=3 SV=1	14	21.204	0.139658	0.854933	-0.273873	1.20905	FALSE	25.423269612336	25.4750586319295	25.2812286250551	25.7386177794681	25.729791641995	25.5327667741558
G4M0V9	tr|G4M0V9|G4M0V9_SCHMA SH3 domain-binding glutamic acid-rich-like protein OS=Schistosoma mansoni GN=Smp_033330 PE=3 SV=1	2	11.926	0.35412	0.45085	0.267347	1.20359	FALSE	20.842513509117	20.6565063112391	20.0091183716479	20.1633523644129	20.4453038190278	20.0974411421875
G4M0W1	tr|G4M0W1|G4M0W1_SCHMA Katanin p60 ATPase-containing subunit A-like 2 OS=Schistosoma mansoni GN=KATNAL2 PE=3 SV=1	1	54.874	0.48545	0.313855	-0.247845	1.18743	FALSE	21.7462602921045	20.7686518352319	20.7545976942502	21.668128639533	21.2083792421818	21.1365375889724
G4M0X2	tr|G4M0X2|G4M0X2_SCHMA Ubiquilin 1,2, putative OS=Schistosoma mansoni GN=Smp_010290 PE=4 SV=1	6	58.648	0.462751	0.334653	0.123428	1.08932	FALSE	21.6844437043661	21.4571278362102	21.5482671550224	21.4279456458382	21.5196425927766	21.371966806767
G4M0Y0	tr|G4M0Y0|G4M0Y0_SCHMA GMP synthetase (Glutamine-hydrolysing) OS=Schistosoma mansoni GN=Smp_063830 PE=4 SV=1	25	81.371	0.309513	0.509321	-0.548552	1.46262	FALSE	21.3769845186219	22.382110184585	21.0284700963844	21.7540120432391	22.9677704797391	21.7114385548896
G4M0Y5;G4M0Y6	tr|G4M0Y5|G4M0Y5_SCHMA Ubiquitin-conjugating enzyme E2 j2, putative OS=Schistosoma mansoni GN=Smp_059750.1 PE=3 SV=1;tr|G4M0Y6|G4M0Y6_SCHMA Ubiquitin-conjugating enzyme E2 j2, putative OS=Schistosoma mansoni GN=Smp_059750.2 PE=3 SV=1	1	25.358	0.355338	0.449358	-0.326435	1.25391	FALSE	17.1329219926848	18.1757783992155	18.0807505986391	17.8605814485739	18.2440925624475	18.2640826018083
G4M0Y8	tr|G4M0Y8|G4M0Y8_SCHMA Uncharacterized protein OS=Schistosoma mansoni GN=Smp_154330 PE=4 SV=1	4	28.589	0.867171	0.0618954	-0.165621	1.12165	FALSE	16.5060826724202	18.8246700325584	16.1834301659406	15.9444263060655	18.6779666769624	17.3886516413605
G4M0Z5	tr|G4M0Z5|G4M0Z5_SCHMA Zinc finger protein, putative OS=Schistosoma mansoni GN=Smp_095680 PE=4 SV=1	1	22.695	0.817406	0.0875624	0.274499	1.20957	FALSE	14.2283307302282	17.9160532491183	17.9410935166464	15.1900229017967	16.9094839590585	17.162474332583
G4M101;G4M102	tr|G4M101|G4M101_SCHMA 4.1 G protein, putative OS=Schistosoma mansoni GN=Smp_095620.1 PE=4 SV=1;tr|G4M102|G4M102_SCHMA 4.1 G protein, putative OS=Schistosoma mansoni GN=Smp_095620.2 PE=4 SV=1	16	76.794	0.421402	0.375304	0.389716	1.31014	FALSE	20.6289004965003	19.7575292649411	20.8951873329393	20.7400823784897	19.3725760808733	19.9998114234676
G4M103	tr|G4M103|G4M103_SCHMA Vesicular integral-membrane protein vip36 (Mannose-binding lectin 2)-related OS=Schistosoma mansoni GN=Smp_174580 PE=4 SV=1	8	34.881	0.237868	0.623665	-0.332323	1.25904	FALSE	21.4598742251968	22.027983390736	21.5247621523632	21.6549309579216	22.0872903749652	22.2673661436298
G4M115	tr|G4M115|G4M115_SCHMA Uncharacterized protein OS=Schistosoma mansoni GN=Smp_212230 PE=4 SV=1	4	30.062	0.208581	0.680725	-0.308794	1.23867	FALSE	19.9473905068941	19.6596795485068	19.3191303611802	20.1236345483421	19.9056418927641	19.8233052934004
G4M126;G4M127	tr|G4M126|G4M126_SCHMA Eukaryotic translation initiation factor 3 subunit E OS=Schistosoma mansoni GN=Smp_176230.1 PE=3 SV=1;tr|G4M127|G4M127_SCHMA Eukaryotic translation initiation factor 3 subunit E OS=Schistosoma mansoni GN=Smp_176230.2 PE=3 SV=1	6	51.923	0.0942572	1.02569	0.32191	1.24998	FALSE	18.9902865831712	18.7317143804683	18.9488020458852	18.5314099479698	18.5160834069785	18.6575787007137
G4M145;G4M146	tr|G4M145|G4M145_SCHMA Islet cell autoantigen, putative OS=Schistosoma mansoni GN=Smp_126770.1 PE=4 SV=1;tr|G4M146|G4M146_SCHMA Islet cell autoantigen, putative OS=Schistosoma mansoni GN=Smp_126770.2 PE=4 SV=1	1	58.071	0.00567183	2.24628	-1.04791	2.06754	TRUE	14.2283307302282	14.5011210631332	14.4707619788912	15.8760590587644	15.39523799474	15.0726561261615
G4M183	tr|G4M183|G4M183_SCHMA Proteasome subunit alpha type OS=Schistosoma mansoni GN=Smp_070930 PE=3 SV=1	7	27.774	0.884253	0.0534234	0.0289232	1.02025	FALSE	22.7777228250265	22.6366198159529	22.4107260266508	22.3615491624066	22.6704375805807	22.7063124227729
G4M184	tr|G4M184|G4M184_SCHMA SLAP, putative (Fragment) OS=Schistosoma mansoni GN=Smp_070920.1 PE=4 SV=1	6	81.29	0.954605	0.0201761	-0.0300857	1.02107	FALSE	17.1429528322431	17.1651233778729	15.3868765637551	16.747905617892	16.4745795659331	16.5627247751651
G4M190	tr|G4M190|G4M190_SCHMA Ras suppressor protein 1, rsu1, putative OS=Schistosoma mansoni GN=Smp_114090 PE=4 SV=1	3	26.083	0.397011	0.401197	-0.199428	1.14824	FALSE	20.1606682059311	19.5375608300127	19.8617351340353	20.1684959373535	19.8727848002668	20.1169662437255
G4M193	tr|G4M193|G4M193_SCHMA Sulfhydryl oxidase OS=Schistosoma mansoni GN=Smp_098710 PE=4 SV=1	13	47.815	0.00338672	2.47022	-0.87775	1.83751	FALSE	21.0583185270703	21.0058023595065	20.6365614715318	21.8579572220318	21.6538467605891	21.8221289456626
G4M194	tr|G4M194|G4M194_SCHMA Uncharacterized protein OS=Schistosoma mansoni GN=Smp_176410 PE=4 SV=1	2	58.653	0.364089	0.438793	-0.649272	1.56838	FALSE	15.6950672446666	14.5011210631332	16.6656095653231	17.172431981583	15.5316227534599	16.1055589124201
G4M1B1	tr|G4M1B1|G4M1B1_SCHMA Mitogen-activated protein kinase OS=Schistosoma mansoni GN=Smp_142050 PE=3 SV=1	2	45.3	0.00798854	2.09753	0.832605	1.7809	FALSE	16.9821281133691	16.8404455971153	17.0413947746717	15.7779895238079	16.4042397834801	16.1839231705495
G4M1B6	tr|G4M1B6|G4M1B6_SCHMA Uncharacterized protein OS=Schistosoma mansoni GN=Smp_036950 PE=4 SV=1	4	74.215	0.61695	0.20975	0.410766	1.32939	FALSE	15.5743398197005	15.9630593235506	17.0005834192472	17.177903460717	14.2911990301902	15.8365815432745
G4M1E1	tr|G4M1E1|G4M1E1_SCHMA Nitrilase-related OS=Schistosoma mansoni GN=Smp_056890.1 PE=4 SV=1	17	64.055	0.330621	0.48067	0.172915	1.12733	FALSE	21.2889829240252	21.2818611414988	21.5139688085065	21.26709503133	21.2216434995992	21.0773284048394
G4M1F3;Q15ER7	tr|G4M1F3|G4M1F3_SCHMA 60S ribosomal protein L14, putative OS=Schistosoma mansoni GN=Smp_175740.1 PE=4 SV=1;tr|Q15ER7|Q15ER7_SCHMA 60S ribosomal protein L14, putative OS=Schistosoma mansoni GN=Smp_175740.2 PE=2 SV=1	5	15.181	0.251779	0.59898	0.449222	1.3653	FALSE	21.7733229193979	20.5884662674377	21.6558161179343	21.1269411189852	20.7256150406519	20.8173820288362
G4M1G1	tr|G4M1G1|G4M1G1_SCHMA Tip120, putative OS=Schistosoma mansoni GN=Smp_170510 PE=4 SV=1	10	145.66	0.837131	0.0772064	0.106221	1.07641	FALSE	18.1072740962031	17.2444613065455	17.9813416913419	18.4071381763155	16.6850092990647	17.922266266053
G4M1G3	tr|G4M1G3|G4M1G3_SCHMA Uncharacterized protein OS=Schistosoma mansoni GN=Smp_062920 PE=4 SV=1	1	143.81	0.00275491	2.55989	-0.760616	1.69421	FALSE	15.4874857384636	15.5782910727117	15.5307246478898	16.1571101104073	16.3723018650698	16.348936177747
G4M1G7	tr|G4M1G7|G4M1G7_SCHMA Growth factor receptor-bound protein, putative OS=Schistosoma mansoni GN=Smp_062950 PE=4 SV=1	5	27.04	0.447294	0.349407	-0.15217	1.11124	FALSE	20.0383739009049	20.2145372537033	20.4680624250085	20.2841648113717	20.3506200778931	20.5426978842336
G4M1H5	tr|G4M1H5|G4M1H5_SCHMA Calcium-transporting ATPase OS=Schistosoma mansoni GN=Smp_199210 PE=3 SV=1	28	105.07	0.146299	0.834759	0.378327	1.29983	FALSE	23.2978282035962	23.0064584282039	23.1300506959203	22.8117630593081	22.4044389157549	23.0831528629621
G4M1J2	tr|G4M1J2|G4M1J2_SCHMA Formin-like OS=Schistosoma mansoni GN=Smp_144430 PE=4 SV=1	7	117.96	0.0301647	1.5205	1.51837	2.86468	FALSE	17.9338357103188	17.4006518100557	16.3913197082419	16.441537864497	15.8134210870665	14.9157280815938
G4M1K0	tr|G4M1K0|G4M1K0_SCHMA Dynamin-associated protein, putative OS=Schistosoma mansoni GN=Smp_135790 PE=4 SV=1	7	180.9	0.701293	0.154101	0.175162	1.12909	FALSE	17.5053529007813	18.0450309605957	16.4249832947888	16.9447790346169	17.4651349235406	17.0399659033002
G4M1K4	tr|G4M1K4|G4M1K4_SCHMA Uncharacterized protein OS=Schistosoma mansoni GN=Smp_212060 PE=4 SV=1	4	74.404	0.0746543	1.12695	-1.66246	3.16557	FALSE	15.4469814590682	17.395952636358	14.4707619788912	17.7182130159369	16.7459302484638	17.8369442522369
G4M1K6	tr|G4M1K6|G4M1K6_SCHMA Pyridoxamine 5-phosphate oxidase OS=Schistosoma mansoni GN=Smp_051550.1 PE=3 SV=1	10	28.877	0.986284	0.00599794	-0.00279314	1.00194	FALSE	21.7300981914139	21.6671777587435	21.6040328027909	21.5424351073965	21.7527612718265	21.7144918062614
G4M1K9	tr|G4M1K9|G4M1K9_SCHMA Acetyltransferase component of pyruvate dehydrogenase complex OS=Schistosoma mansoni GN=Smp_212190 PE=3 SV=1	11	54.382	0.023785	1.6237	-0.490585	1.40501	FALSE	22.2522221438205	22.2137207778522	22.4843487525946	22.7267606229508	22.8270820132102	22.8682039559563
G4M1L1	tr|G4M1L1|G4M1L1_SCHMA Vesicular amine transporter, putative OS=Schistosoma mansoni GN=Smp_199260 PE=3 SV=1	5	149.99	0.0769698	1.11368	-0.833281	1.78173	FALSE	17.7307685236912	17.5450084457527	16.4034860041186	17.796439214888	18.0380468559454	18.3446204352503
G4M1L7	tr|G4M1L7|G4M1L7_SCHMA p25-alpha domain containing protein OS=Schistosoma mansoni GN=Smp_194880 PE=4 SV=1	4	12.813	0.575852	0.239689	0.276424	1.21119	FALSE	18.2759613387751	19.98726039744	19.2556709075837	19.0914998222406	19.148049494886	18.4500722309528
G4M1L8	tr|G4M1L8|G4M1L8_SCHMA Uncharacterized protein (Fragment) OS=Schistosoma mansoni GN=Smp_125710 PE=4 SV=1	1	5.365	0.103584	0.984709	0.497357	1.41163	FALSE	22.0397783504995	21.2635225618657	21.5881721889001	21.1723792703541	21.3498817217969	20.877140883982
G4M1M7	tr|G4M1M7|G4M1M7_SCHMA Uncharacterized protein OS=Schistosoma mansoni GN=Smp_124760 PE=4 SV=1	7	161.52	7.12786e-05	4.14704	2.79736	6.95166	TRUE	17.4706629533229	17.5825387286869	17.4292759425856	15.2853963814032	14.2728824249109	14.5321256808221
G4M1N4	tr|G4M1N4|G4M1N4_SCHMA Chromatin-specific transcription elongation factor 140 kDa subunit (M24 family) OS=Schistosoma mansoni GN=Smp_212220 PE=4 SV=1	2	82.227	0.0108927	1.96286	1.56602	2.96087	FALSE	17.0283593484134	16.5018674698897	17.164044459141	15.6161874543689	14.4448257711849	15.9351885350189
G4M1N6	tr|G4M1N6|G4M1N6_SCHMA Tropomyosin, putative OS=Schistosoma mansoni GN=Smp_022170 PE=4 SV=1	5	28.423	0.0789011	1.10292	-0.370373	1.29269	FALSE	20.852683843265	20.4935007237365	20.7929346019969	21.0429856476953	21.0211853633144	21.1860660415279
G4M1R0	tr|G4M1R0|G4M1R0_SCHMA Plasma membrane calcium-transporting atpase,putative OS=Schistosoma mansoni GN=Smp_176130 PE=4 SV=1	2	5.3159	0.0017866	2.74797	1.08965	2.12823	TRUE	21.9091744184372	21.7363885564586	22.2289564389333	20.9360324267635	20.6648295323612	21.0046961148907
G4M1S7	tr|G4M1S7|G4M1S7_SCHMA Myosin regulatory light chain 2 smooth muscle,putative OS=Schistosoma mansoni GN=Smp_199400 PE=4 SV=1	3	19.593	0.163847	0.785562	-0.610274	1.52655	FALSE	19.9403209335693	21.4099301035464	20.9018735900191	21.2239333507344	21.4455013132158	21.4135125794302
G4M1T0	tr|G4M1T0|G4M1T0_SCHMA Nebula, putative OS=Schistosoma mansoni GN=Smp_102960 PE=4 SV=1	5	40.432	0.0283608	1.54728	-0.886824	1.8491	FALSE	17.7146625839668	18.8548196884937	18.2872569377131	19.1493265069037	19.0875055259672	19.2803797840081
G4M1T7	tr|G4M1T7|G4M1T7_SCHMA 26S proteasome non-ATPase regulatory subunit,putative OS=Schistosoma mansoni GN=Smp_047740 PE=4 SV=1	12	30.945	0.816989	0.0877837	0.0398998	1.02804	FALSE	20.8760371913921	21.1446624232095	21.0401403067495	20.8621415583657	21.0688201614545	21.010178675933
G4M1U8;G4M1U7	tr|G4M1U8|G4M1U8_SCHMA Voltage-dependent anion-selective channel,putative OS=Schistosoma mansoni GN=Smp_091240.1 PE=4 SV=1;tr|G4M1U7|G4M1U7_SCHMA Voltage-dependent anion-selective channel,putative OS=Schistosoma mansoni GN=Smp_091240.2 PE=4 SV=1	18	31.332	0.00398313	2.39978	-0.771122	1.7066	FALSE	25.3276515036783	25.6345855035222	25.410622608887	26.1050059725998	26.2664988017446	26.3147204624091
G4M1X2	tr|G4M1X2|G4M1X2_SCHMA Lanc-like protein (Fragment) OS=Schistosoma mansoni GN=Smp_118820 PE=4 SV=1	3	11.962	0.682055	0.166181	-0.104809	1.07535	FALSE	20.9567340234602	20.2715957092579	20.7747936832775	20.7507124381108	21.0012388768903	20.5656001101363
G4M1X6;G4M1X7;C4QU84	tr|G4M1X6|G4M1X6_SCHMA Uncharacterized protein OS=Schistosoma mansoni GN=Smp_120640.3 PE=4 SV=1;tr|G4M1X7|G4M1X7_SCHMA Uncharacterized protein OS=Schistosoma mansoni GN=Smp_120640.2 PE=4 SV=1;tr|C4QU84|C4QU84_SCHMA Uncharacterized protein OS=Schistosoma ma	2	59.958	0.11172	0.951868	-1.26838	2.40891	FALSE	14.2283307302282	16.5407573742513	14.4707619788912	15.6600687949429	16.8124903792461	16.5724382947133
G4M201	tr|G4M201|G4M201_SCHMA Stromal cell-derived factor 2-like protein OS=Schistosoma mansoni GN=Smp_199700 PE=4 SV=1	4	17.584	0.257445	0.589316	-2.26138	4.79448	FALSE	20.770560990767	21.3012400146426	14.4707619788912	20.7199245326911	21.2264785816637	21.3802858209535
G4M207	tr|G4M207|G4M207_SCHMA Rab6-interacting protein 2/elks/erc/cast,putative OS=Schistosoma mansoni GN=Smp_165890 PE=4 SV=1	7	57.547	0.8875	0.0518315	0.111898	1.08065	FALSE	17.5610725517571	19.3132607124765	18.9253664859914	19.4012386239678	17.0245734641897	19.0381926225769
G4M234	tr|G4M234|G4M234_SCHMA Uncharacterized protein OS=Schistosoma mansoni GN=Smp_205720 PE=4 SV=1	2	7.731	0.046759	1.33013	-0.628773	1.54625	FALSE	22.2081465763194	21.8863139074837	22.5874160402304	22.8887156235003	23.1001900186285	22.5792893849453
G4M238	tr|G4M238|G4M238_SCHMA 6-phosphogluconate dehydrogenase,putative OS=Schistosoma mansoni GN=Smp_199860 PE=4 SV=1	2	17.565	0.490397	0.309452	-1.46683	2.76415	FALSE	22.0149834695467	19.9568814448795	14.4707619788912	19.3547465999205	22.1404695690318	19.3479114736007
G4M276	tr|G4M276|G4M276_SCHMA Uncharacterized protein OS=Schistosoma mansoni GN=Smp_206010 PE=4 SV=1	3	34.816	0.365539	0.437066	0.312332	1.24171	FALSE	18.5404677639497	19.5192431121471	19.6131114672502	18.7892879798434	18.9610378699898	18.9855004477458
G4V5D9	tr|G4V5D9|G4V5D9_SCHMA Defective in cullin neddylation protein OS=Schistosoma mansoni GN=Smp_105330 PE=4 SV=1	2	31.045	0.686717	0.163222	-0.172523	1.12703	FALSE	19.1505572925998	19.039047520043	17.7766951107532	18.5780185145902	18.8012377620513	19.1046136316157
G4V5E4	tr|G4V5E4|G4V5E4_SCHMA Uncharacterized protein OS=Schistosoma mansoni GN=Smp_181050 PE=4 SV=1	26	117.03	0.808899	0.0921057	-0.0708058	1.0503	FALSE	20.5995627704527	21.0050639254261	20.0419931136756	20.7631159909081	20.446192330047	20.6497288944065
G4V5E6	tr|G4V5E6|G4V5E6_SCHMA Fragile X related 2, frx2 OS=Schistosoma mansoni GN=Smp_016050 PE=4 SV=1	10	86.547	0.0981965	1.0079	-0.721454	1.64884	FALSE	19.3493816094334	18.1517226319623	19.2298945331473	19.8615345305208	19.3110653503518	19.7227613805248
G4V5F5;G4V5F4;G4V5F6	tr|G4V5F5|G4V5F5_SCHMA Putative flotillin-1 OS=Schistosoma mansoni GN=Smp_016200.3 PE=4 SV=1;tr|G4V5F4|G4V5F4_SCHMA Putative flotillin-1 OS=Schistosoma mansoni GN=Smp_016200.1 PE=4 SV=1;tr|G4V5F6|G4V5F6_SCHMA Putative flotillin-1 OS=Schistosoma mansoni GN=	11	46.559	0.0791868	1.10135	0.473822	1.38878	FALSE	20.2488494931579	20.3120936550919	20.6263382764392	19.5711350665226	20.1000802525295	20.0946000511483
G4V5G7	tr|G4V5G7|G4V5G7_SCHMA Glycogenin-related OS=Schistosoma mansoni GN=Smp_008490 PE=4 SV=1	14	36.51	0.00105496	2.97676	-1.26256	2.39922	TRUE	21.6424019335492	21.2208404894063	21.3524526885477	22.3730289441196	22.7898072470386	22.8405537743225
G4V5I6	tr|G4V5I6|G4V5I6_SCHMA Putative cyclin OS=Schistosoma mansoni GN=Smp_152760 PE=4 SV=1	5	35.532	0.143581	0.842903	0.845528	1.79692	FALSE	19.3617050758582	19.6449233932946	17.8768104209448	17.9593766475314	18.5406951007257	17.8467831292016
G4V5I7	tr|G4V5I7|G4V5I7_SCHMA Uncharacterized protein OS=Schistosoma mansoni GN=Smp_056990 PE=4 SV=1	3	43.221	0.00365246	2.43741	-1.26756	2.40754	TRUE	16.4518148338586	17.3132076848896	17.1284284020725	18.1411313594849	18.0935419685371	18.4614541759048
G4V5L4	tr|G4V5L4|G4V5L4_SCHMA Putative chaperonin containing t-complex protein 1, zeta subunit, tcpz OS=Schistosoma mansoni GN=Smp_004990 PE=3 SV=1	20	59.885	0.18714	0.727833	0.22367	1.1677	FALSE	23.5691179551118	23.423672143181	23.5716913537143	23.2796628746938	23.3432459553356	23.2705629815791
G4V5L5	tr|G4V5L5|G4V5L5_SCHMA Uncharacterized protein OS=Schistosoma mansoni GN=Smp_005000 PE=4 SV=1	4	28.081	0.302612	0.519114	0.437986	1.35471	FALSE	20.0551377275211	19.7443354625714	19.2454650357425	19.3407429790604	19.8357606485731	18.5544778138934
G4V5M0;G4V5L9	tr|G4V5M0|G4V5M0_SCHMA Putative chromosome region maintenance protein 1/exportin OS=Schistosoma mansoni GN=Smp_124820.1 PE=4 SV=1;tr|G4V5L9|G4V5L9_SCHMA Putative chromosome region maintenance protein 1/exportin OS=Schistosoma mansoni GN=Smp_124820.2 PE=4 S	9	94.869	0.675416	0.170429	-0.16299	1.11961	FALSE	19.0835022830161	18.8648758830702	17.7518311598653	18.8219900792166	18.6000575460612	18.7671315445986
G4V5M2	tr|G4V5M2|G4V5M2_SCHMA Uncharacterized protein OS=Schistosoma mansoni GN=Smp_005060.1 PE=4 SV=1	4	17.028	0.563996	0.248724	0.122373	1.08852	FALSE	22.6736504517016	22.4062682027478	22.4404761840301	22.1464696310235	22.3478757054631	22.6589291601903
G4V5N5	tr|G4V5N5|G4V5N5_SCHMA Putative centrosomal protein of 135 kDa (Cep135 protein) (Centrosomal protein 4) OS=Schistosoma mansoni GN=Smp_151590 PE=4 SV=1	10	73.007	0.00116931	2.93207	1.79734	3.4758	TRUE	18.8157621249929	19.2028210557441	18.8728761882186	17.204305837925	16.6048045395516	17.6903151214964
G4V5N6	tr|G4V5N6|G4V5N6_SCHMA Putative pdz domain containing protein OS=Schistosoma mansoni GN=Smp_151580 PE=4 SV=1	2	19.827	2.74423e-05	4.56158	3.46265	11.0245	TRUE	17.7853721396998	17.7203222126646	18.5723127947373	14.8850562966287	14.2728824249109	14.5321256808221
G4V5N8	tr|G4V5N8|G4V5N8_SCHMA Putative DNA replication licensing factor MCM1 OS=Schistosoma mansoni GN=Smp_151560 PE=3 SV=1	1	96.054	0.10103	0.995551	0.553741	1.46789	FALSE	17.7569297519482	17.2533326337511	18.2363819309801	17.3532061952829	17.2341583016803	16.998055635181
G4V5P4;G4V5P5	tr|G4V5P4|G4V5P4_SCHMA Putative 60S ribosomal protein L23 OS=Schistosoma mansoni GN=Smp_007900.2 PE=3 SV=1;tr|G4V5P5|G4V5P5_SCHMA Putative 60S ribosomal protein L23 OS=Schistosoma mansoni GN=Smp_007900.1 PE=3 SV=1	4	12.537	0.006231	2.20544	-1.34335	2.53739	TRUE	20.7244431410575	19.6396467534647	20.1695048157746	21.7572037087286	21.1846769971931	21.6217524695255
G4V5P8	tr|G4V5P8|G4V5P8_SCHMA Dihydropyrimidinase related protein-3 (M38 family) OS=Schistosoma mansoni GN=Smp_196810 PE=4 SV=1	6	34.369	0.0493161	1.30701	-0.785261	1.7234	FALSE	20.5547417860216	21.5294356418323	20.4619006842449	21.7218552830139	21.6884676989359	21.4915395343048
G4V5P9	tr|G4V5P9|G4V5P9_SCHMA Uncharacterized protein (Fragment) OS=Schistosoma mansoni GN=Smp_092460 PE=4 SV=1	6	21.823	0.334118	0.4761	-0.317307	1.246	FALSE	19.4026428483619	19.1904316561005	18.8783109171449	19.8349498785616	19.6814587487752	18.9068969748259
G4V5Q1	tr|G4V5Q1|G4V5Q1_SCHMA Putative nadh-plastoquinone oxidoreductase OS=Schistosoma mansoni GN=Smp_092490.1 PE=3 SV=1	4	23.406	0.256118	0.59156	-0.238183	1.17951	FALSE	21.2099429994379	20.7954720613194	20.7824867074123	21.2336009589951	21.2159241284467	21.052925470336
G4V5Q2	tr|G4V5Q2|G4V5Q2_SCHMA Uncharacterized protein OS=Schistosoma mansoni GN=Smp_092500 PE=4 SV=1	3	15.094	0.992293	0.00335988	-0.00242045	1.00168	FALSE	19.4470847292697	19.9080877126606	19.9431236651644	20.0671631784957	19.771787142916	19.4666071295804
G4V5Q4	tr|G4V5Q4|G4V5Q4_SCHMA Eukaryotic translation initiation factor 3 subunit A OS=Schistosoma mansoni GN=Smp_001170 PE=3 SV=1	7	121.72	0.00860535	2.06523	-1.69104	3.2289	TRUE	16.5914232994858	15.1930563906474	15.7589056953621	18.1317125431871	17.3812327327033	17.1035672449843
G4V5Q9	tr|G4V5Q9|G4V5Q9_SCHMA Uncharacterized protein OS=Schistosoma mansoni GN=Smp_001100 PE=4 SV=1	8	78.592	0.904591	0.0435476	0.0868006	1.06201	FALSE	17.7781661829988	18.6404923138224	16.3940718866168	16.4986788595919	17.9414828644139	18.1121669168037
G4V5R8	tr|G4V5R8|G4V5R8_SCHMA Kinesin heavy chain OS=Schistosoma mansoni GN=Smp_001040 PE=3 SV=1	41	115.09	0.324727	0.488482	-0.417758	1.33585	FALSE	22.4901081954244	22.5902999643228	21.2247588214789	22.514371032909	22.428966656875	22.6151042201161
G4V5R9	tr|G4V5R9|G4V5R9_SCHMA 5-amp-activated protein kinase gamma-2 non-catalytic subunit transcript variant 2 OS=Schistosoma mansoni GN=Smp_001030 PE=4 SV=1	4	32.155	0.770275	0.113354	-0.0864544	1.06176	FALSE	18.8933604754494	19.1307835543977	18.1727086933072	18.8300701728978	18.6802173455076	18.9459285349312
G4V5S1	tr|G4V5S1|G4V5S1_SCHMA Uncharacterized protein Smp_200240 OS=Schistosoma mansoni GN=Smp_200240 PE=4 SV=1	6	19.456	0.0423399	1.37325	-0.701612	1.62632	FALSE	24.5640680568812	24.5121287765767	23.7326816983566	24.939819698598	25.1413156149804	24.8325790835249
G4V5S2	tr|G4V5S2|G4V5S2_SCHMA Uncharacterized protein OS=Schistosoma mansoni GN=Smp_001000 PE=4 SV=1	3	19.332	0.0605453	1.21792	-1.2362	2.35577	FALSE	21.478535175099	21.1416046797259	19.7064341673529	22.0596307780646	21.4334044179438	22.5421380229109
G4V5T8	tr|G4V5T8|G4V5T8_SCHMA Mannose-6-phosphate isomerase OS=Schistosoma mansoni GN=Smp_089590 PE=3 SV=1	16	53.364	0.873299	0.0588369	-0.0296067	1.02073	FALSE	21.5625317607799	21.7621595270166	21.9520801408433	21.7164943019723	21.912230206793	21.7368670004843
G4V5U3;G4V5U2	tr|G4V5U3|G4V5U3_SCHMA Succinate dehydrogenase [ubiquinone] iron-sulfur subunit, mitochondrial OS=Schistosoma mansoni GN=Smp_089640.2 PE=3 SV=1;tr|G4V5U2|G4V5U2_SCHMA Succinate dehydrogenase [ubiquinone] iron-sulfur subunit, mitochondrial OS=Schistosoma ma	14	32.268	0.185642	0.731324	-0.283521	1.21716	FALSE	24.0975965593	23.9976380988531	23.6878704233022	24.0500213195764	24.3530829256555	24.230563509505
G4V5U5	tr|G4V5U5|G4V5U5_SCHMA Putative macroglobulin/complement OS=Schistosoma mansoni GN=Smp_089670 PE=4 SV=1	29	229.89	0.0226524	1.64488	0.734008	1.66325	FALSE	20.5529196562366	20.7405350858111	21.0697828678476	20.4126312441601	19.9261666497158	19.8224151725942
G4V5V7	tr|G4V5V7|G4V5V7_SCHMA Putative tubulin-specific chaperone B (Tubulin folding cofactor B) OS=Schistosoma mansoni GN=Smp_055400 PE=4 SV=1	4	27.62	0.548596	0.260748	0.209381	1.15619	FALSE	19.5279660461345	18.8917571735308	19.3134066351942	18.4136254239624	19.331042407456	19.3603178563255
G4V5W4	tr|G4V5W4|G4V5W4_SCHMA Uncharacterized protein OS=Schistosoma mansoni GN=Smp_055450 PE=4 SV=1	2	18.377	0.41214	0.384955	0.364519	1.28745	FALSE	19.2764263492678	20.1154476574398	18.5611453265656	18.744728743346	18.8642565288854	19.2504761650359
G4V5Y0	tr|G4V5Y0|G4V5Y0_SCHMA Isocitrate dehydrogenase [NAD] subunit, mitochondrial OS=Schistosoma mansoni GN=Smp_056200 PE=3 SV=1	8	43.546	0.00747444	2.12642	-0.74153	1.67195	FALSE	21.1992533795543	20.8696434556394	21.2202342928579	21.6533401712836	21.9086891468876	21.9516909209865
G4V5Z8	tr|G4V5Z8|G4V5Z8_SCHMA Uncharacterized protein OS=Schistosoma mansoni GN=Smp_005180 PE=4 SV=1	6	57.872	0.170891	0.76728	-0.315205	1.24419	FALSE	18.7260441108446	19.2976932523132	19.0027804395008	19.3737331731567	19.2090424512918	19.3893559103718
G4V604;A5H658	tr|G4V604|G4V604_SCHMA Histone deacetylase OS=Schistosoma mansoni GN=Smp_005210 PE=3 SV=1;tr|A5H658|A5H658_SCHMA Histone deacetylase OS=Schistosoma mansoni GN=HDAC1 PE=2 SV=1	4	52.499	0.307739	0.511817	0.262549	1.1996	FALSE	18.4142679683506	18.6670844009013	17.9519891831558	18.1118091129453	18.2227731356719	17.9111135630212
G4V605	tr|G4V605|G4V605_SCHMA Putative 40s ribosomal protein S5 OS=Schistosoma mansoni GN=Smp_093440 PE=3 SV=1	4	21.755	0.686379	0.163436	-0.274767	1.2098	FALSE	20.1407581530744	18.055466413262	20.5217522321635	20.0222449937466	19.8384702750647	19.6815624212866
G4V610;G4V609;G4V611	tr|G4V610|G4V610_SCHMA EF hand containing protein OS=Schistosoma mansoni GN=Smp_005230.3 PE=4 SV=1;tr|G4V609|G4V609_SCHMA Putative ef hand containing protein OS=Schistosoma mansoni GN=Smp_005230.1 PE=4 SV=1;tr|G4V611|G4V611_SCHMA EF hand containing protein	6	26.72	0.0639774	1.19397	-1.82217	3.53612	FALSE	16.9678036078963	19.8509163200496	19.877656637287	20.7279395257553	20.6312799661008	20.8036590727251
G4V612	tr|G4V612|G4V612_SCHMA Stoned-related OS=Schistosoma mansoni GN=Smp_124910 PE=4 SV=1	3	240.96	0.238614	0.622305	-0.696132	1.62016	FALSE	14.2283307302282	15.8666258228866	15.9493549876948	16.0387786949966	15.5624849770976	16.5314436060129
G4V613	tr|G4V613|G4V613_SCHMA Putative endoplasmic reticulum oxidoreductin 1 (ERO1) OS=Schistosoma mansoni GN=Smp_124920 PE=4 SV=1	8	47.492	0.0975408	1.01081	-0.304731	1.23519	FALSE	19.5686481694843	19.4210941208124	19.3885891531987	19.8573250104755	19.7113470776026	19.7238513381106
G4V622	tr|G4V622|G4V622_SCHMA Optic atrophy 1-like protein, opa1 OS=Schistosoma mansoni GN=Smp_028120 PE=3 SV=1	13	101.18	0.00948257	2.02307	-1.02186	2.03053	TRUE	18.092614517592	18.5354031295517	17.6095406756949	19.1927548094706	18.9183048412847	19.1920740116704
G4V624;G4V625	tr|G4V624|G4V624_SCHMA Putative ubiquitin-conjugating enzyme E2 G OS=Schistosoma mansoni GN=Smp_028100.1 PE=3 SV=1;tr|G4V625|G4V625_SCHMA Putative ubiquitin-conjugating enzyme E2 G OS=Schistosoma mansoni GN=Smp_028100.2 PE=3 SV=1	4	19.28	0.0717029	1.14446	-0.65158	1.57089	FALSE	20.3381997628065	20.4603637890604	19.5088663606935	20.6380986698062	20.9808083609173	20.643262620948
G4V630;G4V629	tr|G4V630|G4V630_SCHMA Bicaudal D-like protein OS=Schistosoma mansoni GN=Smp_028070.2 PE=4 SV=1;tr|G4V629|G4V629_SCHMA Bicaudal D-like protein OS=Schistosoma mansoni GN=Smp_028070.1 PE=4 SV=1	6	104.06	0.00898935	2.04627	-2.17483	4.51532	TRUE	15.2178425839621	16.6784667508579	14.4707619788912	17.9853955471635	17.3118671666584	17.5942959089592
G4V642	tr|G4V642|G4V642_SCHMA Nuclear pore membrane glycoprotein gp210-related OS=Schistosoma mansoni GN=Smp_142550 PE=4 SV=1	8	244.33	0.405823	0.391663	0.842639	1.79333	FALSE	11.7231638138271	14.2506326560499	15.1749965400275	12.9030874796414	12.0223297371307	13.6954580279147
G4V651	tr|G4V651|G4V651_SCHMA Guanylate cyclase OS=Schistosoma mansoni GN=Smp_142620 PE=3 SV=1	2	177.96	0.650021	0.187072	0.260708	1.19807	FALSE	14.2283307302282	14.5011210631332	14.4296243775688	15.3944267621184	13.3557023600593	13.6268233308441
G4V653	tr|G4V653|G4V653_SCHMA Putative talin 2 OS=Schistosoma mansoni GN=Smp_142630 PE=4 SV=1	65	235.41	0.340189	0.46828	-0.186742	1.13819	FALSE	21.7978237212115	21.4889305938868	21.5956149211199	21.9058918521028	21.6188124226787	21.9178917218568
G4V654	tr|G4V654|G4V654_SCHMA Putative talin OS=Schistosoma mansoni GN=Smp_037860 PE=4 SV=1	16	60.534	0.433217	0.363294	-0.165213	1.12133	FALSE	20.5080876430961	20.337996462832	20.2630216115338	20.8021347897499	20.2926312385966	20.5099798299556
G4V655	tr|G4V655|G4V655_SCHMA NAD(P)H-hydrate epimerase OS=Schistosoma mansoni GN=Smp_142640 PE=3 SV=1	2	27.042	0.0229112	1.63995	-3.26964	9.64408	FALSE	14.2283307302282	18.2146224245656	17.9798554492811	20.0741930430622	20.3916838105601	19.7658621717491
G4V664;G4V663	tr|G4V664|G4V664_SCHMA Similar to TatD DNAse domain containing 1 OS=Schistosoma mansoni GN=Smp_000810.1 PE=4 SV=1;tr|G4V663|G4V663_SCHMA Tatd DNAse-related OS=Schistosoma mansoni GN=Smp_000810.2 PE=4 SV=1	2	34.222	0.486624	0.312807	-0.317905	1.24652	FALSE	16.3962816170425	17.0444560926197	16.3571266035951	17.450955064963	16.0418345852539	17.2587907812326
G4V669	tr|G4V669|G4V669_SCHMA Family M13 non-peptidase homologue (M13 family) OS=Schistosoma mansoni GN=Smp_000755 PE=4 SV=1	15	92.819	0.203454	0.691534	-0.719173	1.64624	FALSE	21.4238075617552	21.5910929318699	19.7854673953726	21.4757772562765	21.5755712170575	21.906537035939
G4V672	tr|G4V672|G4V672_SCHMA Putative f1 OS=Schistosoma mansoni GN=Smp_194170 PE=4 SV=1	5	13.523	0.036728	1.435	-1.01626	2.02267	FALSE	21.6653524014412	21.7478610472325	20.4309085047615	22.224078662853	22.2609162801101	22.4079075732841
G4V678	tr|G4V678|G4V678_SCHMA Protein kinase OS=Schistosoma mansoni GN=Smp_176440 PE=4 SV=1	6	92.392	0.00958994	2.01818	-2.34989	5.09787	TRUE	13.4492599465426	15.4803985370146	15.4861275053309	17.5039066294603	16.5316525190817	17.4299101185717
G4V683	tr|G4V683|G4V683_SCHMA Serine/threonine kinase OS=Schistosoma mansoni GN=Smp_098840 PE=3 SV=1	5	49.25	0.00183841	2.73556	-1.00363	2.00504	TRUE	19.097517613499	18.9375064876292	19.4192222779216	20.0951588621841	20.1123224347428	20.257662353298
G4V686	tr|G4V686|G4V686_SCHMA Putative propionyl-CoA carboxylase beta chain,mitochondrial OS=Schistosoma mansoni GN=Smp_163230 PE=4 SV=1	3	60.271	0.00836483	2.07754	-2.32072	4.99582	TRUE	14.2283307302282	14.4977484899512	16.402545576971	17.6958393998879	17.0019776012379	17.3929748917989
G4V688	tr|G4V688|G4V688_SCHMA Putative WD-repeat protein OS=Schistosoma mansoni GN=Smp_163210 PE=4 SV=1	16	89.543	0.0485574	1.31374	-0.520261	1.43421	FALSE	20.173208007094	20.237632133092	20.0954012962013	20.3217217113528	20.8905621993955	20.8547405409089
G4V697	tr|G4V697|G4V697_SCHMA Putative collagen alpha chain OS=Schistosoma mansoni GN=Smp_159600 PE=3 SV=1	5	159.24	0.701836	0.153764	-0.114369	1.0825	FALSE	17.6605420649624	17.6003791565704	17.9970612128081	18.2770109831959	17.3467130514238	17.9773662769428
G4V698	tr|G4V698|G4V698_SCHMA Putative malate dehydrogenase OS=Schistosoma mansoni GN=Smp_129610 PE=4 SV=1	3	41.758	0.0253398	1.5962	-1.94071	3.83895	FALSE	14.2283307302282	15.4290585013337	16.747994480997	16.878970862994	17.4844088140431	17.8641379466406
G4V6A5	tr|G4V6A5|G4V6A5_SCHMA Uncharacterized protein OS=Schistosoma mansoni GN=Smp_013690 PE=4 SV=1	8	48.04	0.487436	0.312082	-0.16071	1.11784	FALSE	20.0310899761999	20.6976097533707	20.4484234528464	20.464720659584	20.6014584706107	20.593073677549
G4V6B1	tr|G4V6B1|G4V6B1_SCHMA Putative mitochondrial 2-oxoglutarate/malate carrier protein OS=Schistosoma mansoni GN=Smp_004080 PE=3 SV=1	3	34.372	0.79415	0.100098	-0.299127	1.2304	FALSE	14.7831486846842	14.5011210631332	17.9873305698432	17.026367053904	14.6519550870635	16.4906593298653
G4V6B2	tr|G4V6B2|G4V6B2_SCHMA Carbonic anhydrase OS=Schistosoma mansoni GN=Smp_004070 PE=3 SV=1	2	27.699	0.12232	0.912504	1.42897	2.69254	FALSE	17.5234090000756	17.4649774337948	18.3580696403018	17.210362278896	17.3170573450858	14.5321256808221
G4V6B6	tr|G4V6B6|G4V6B6_SCHMA Putative chromosome transmission fidelity factor OS=Schistosoma mansoni GN=Smp_004020 PE=4 SV=1	4	154.55	0.0143084	1.84441	-1.09287	2.13298	FALSE	14.7937901542114	15.2600385461402	14.3078449228655	15.477829771004	15.9426138586398	16.2198430044915
G4V6B9;P48501	tr|G4V6B9|G4V6B9_SCHMA Triosephosphate isomerase OS=Schistosoma mansoni GN=Smp_003990 PE=1 SV=1;sp|P48501|TPIS_SCHMA Triosephosphate isomerase OS=Schistosoma mansoni GN=TPI PE=1 SV=1	18	28.094	0.0542423	1.26566	-0.367808	1.29039	FALSE	26.793144621219	26.6954340417561	26.6854219437708	27.0638002839596	27.2056016529769	27.0080238016625
G4V6C0	tr|G4V6C0|G4V6C0_SCHMA Family C2 unassigned peptidase (C02 family) OS=Schistosoma mansoni GN=Smp_003980 PE=3 SV=1	5	81.782	0.88976	0.050727	-0.0260514	1.01822	FALSE	18.2933434170034	18.5028070364117	18.5408879332035	18.4615195940052	18.2889820164095	18.6646909126296
G4V6C2	tr|G4V6C2|G4V6C2_SCHMA Putative elongation factor-1 beta,delta OS=Schistosoma mansoni GN=Smp_003970 PE=4 SV=1	8	26.66	0.491246	0.308701	-0.14727	1.10747	FALSE	23.1300238846576	22.9510698182249	22.6299435927673	22.9471004811938	23.2307246744168	22.9750223364745
G4V6D5	tr|G4V6D5|G4V6D5_SCHMA Succinate dehydrogenase [ubiquinone] cytochrome b small subunit OS=Schistosoma mansoni GN=Smp_037910 PE=3 SV=1	2	17.285	0.169721	0.770264	-0.315343	1.24431	FALSE	21.2365347084419	20.906401438694	20.9282359254095	21.5861077840721	21.1115136619783	21.319578244521
G4V6D6	tr|G4V6D6|G4V6D6_SCHMA Uncharacterized protein OS=Schistosoma mansoni GN=Smp_084620 PE=4 SV=1	3	13.112	0.287308	0.541652	-1.13729	2.19968	FALSE	17.390278954266	21.2187896493175	19.9631191286572	20.0006929835401	21.1557587970455	20.8276209425265
G4V6D7	tr|G4V6D7|G4V6D7_SCHMA Fas-associated factor-related OS=Schistosoma mansoni GN=Smp_084610 PE=4 SV=1	3	58.647	0.374764	0.426242	-0.778161	1.71494	FALSE	17.0859449193934	14.5011210631332	17.3136898219732	17.6863363320317	17.1553121291492	16.3935914427885
G4V6E9;C1M1H8;G4VL73	tr|G4V6E9|G4V6E9_SCHMA Histone H2B OS=Schistosoma mansoni GN=Smp_036220 PE=3 SV=1;tr|C1M1H8|C1M1H8_SCHMA Histone H2B OS=Schistosoma mansoni GN=Smp_108390 PE=3 SV=1;tr|G4VL73|G4VL73_SCHMA Putative histone H2B OS=Schistosoma mansoni GN=Smp_077790 PE=3 SV=1	6	13.577	0.0189065	1.72339	1.65231	3.14336	FALSE	25.3775061383103	23.7703910699704	25.072652896811	23.7960262899311	22.8144834723383	22.653112121397
G4V6F4;G4V6F5;G4V6F7;G4V6F6	tr|G4V6F4|G4V6F4_SCHMA Putative arginine/serine-rich splicing factor OS=Schistosoma mansoni GN=Smp_036270.10 PE=4 SV=1;tr|G4V6F5|G4V6F5_SCHMA Putative arginine/serine-rich splicing factor OS=Schistosoma mansoni GN=Smp_036270.2 PE=4 SV=1;tr|G4V6F7|G4V6F7_SC	3	41.896	0.854244	0.0684183	-0.0333929	1.02342	FALSE	19.6050525406921	19.7468307785114	19.7236569548537	19.6765154188542	19.5599223820967	19.9392811296958
G4V6G9	tr|G4V6G9|G4V6G9_SCHMA Putative titin OS=Schistosoma mansoni GN=Smp_105020 PE=4 SV=1	15	83.179	0.0946282	1.02398	-0.340082	1.26583	FALSE	23.7481474016487	23.815077783696	23.4584631248229	23.9654149369116	24.0790716762856	23.9974473641147
G4V6H2	tr|G4V6H2|G4V6H2_SCHMA Putative nocturnin OS=Schistosoma mansoni GN=Smp_105040 PE=4 SV=1	7	38.874	0.0631762	1.19945	-0.556699	1.4709	FALSE	18.8501557828595	18.4993620708179	18.8099973616414	19.1895586471722	19.684975844103	18.9550770057137
G4V6J3	tr|G4V6J3|G4V6J3_SCHMA Coatomer subunit gamma OS=Schistosoma mansoni GN=Smp_092770 PE=3 SV=1	18	101.22	0.436193	0.360322	-0.327416	1.25476	FALSE	19.5560063332711	19.0805442766689	19.9357373293573	20.2073813360889	19.107762499472	20.2393911590639
G4V6J4	tr|G4V6J4|G4V6J4_SCHMA ATPase ASNA1 homolog OS=Schistosoma mansoni GN=Smp_210810 PE=3 SV=1	6	42.869	0.606294	0.217317	-0.103982	1.07474	FALSE	20.5866839789546	20.4363414532551	20.7830833378692	20.4716524304557	20.8084882360131	20.837913547367
G4V6J5	tr|G4V6J5|G4V6J5_SCHMA G protein-coupled receptor kinase OS=Schistosoma mansoni GN=Smp_210820 PE=3 SV=1	12	86.485	0.0239186	1.62126	-0.630722	1.54834	FALSE	17.8706885193565	18.3661541761627	17.9635854044977	18.4871251773694	18.7521706346889	18.8532969995337
G4V6K8	tr|G4V6K8|G4V6K8_SCHMA Putative histone h1/h5 OS=Schistosoma mansoni GN=Smp_003770 PE=3 SV=1	1	20.446	0.00166807	2.77779	1.70119	3.2517	TRUE	21.2995450166201	21.2648940754597	22.071144444451	20.2426663975188	19.8019320590049	19.4874059184286
G4V6L7	tr|G4V6L7|G4V6L7_SCHMA Putative dead box ATP-dependent RNA helicase OS=Schistosoma mansoni GN=Smp_003660 PE=4 SV=1	11	49.088	0.00348214	2.45815	0.855371	1.80922	FALSE	21.947018133488	21.9463976186183	21.8795707666507	21.3445908373095	20.9366718426739	20.9256095442753
G4V6M0	tr|G4V6M0|G4V6M0_SCHMA Putative splicing factor 3a OS=Schistosoma mansoni GN=Smp_003630 PE=4 SV=1	5	59.673	0.159733	0.796605	-0.751059	1.68303	FALSE	17.4851381406074	16.6736338181562	15.7390257796879	17.345425971944	17.7568571460972	17.0486910284178
G4V6M3;G4V6M2	tr|G4V6M3|G4V6M3_SCHMA Uncharacterized protein OS=Schistosoma mansoni GN=Smp_003610.2 PE=4 SV=1;tr|G4V6M2|G4V6M2_SCHMA Uncharacterized protein OS=Schistosoma mansoni GN=Smp_003610.1 PE=4 SV=1	5	17.621	0.042445	1.37217	-0.58751	1.50265	FALSE	21.9232365029678	21.3910245849865	21.1977799356718	22.1254249273962	22.0703257217781	22.078820003124
G4V6M6	tr|G4V6M6|G4V6M6_SCHMA Uncharacterized protein OS=Schistosoma mansoni GN=Smp_124100 PE=4 SV=1	1	104.44	0.00964625	2.01564	-2.97165	7.84431	TRUE	13.7032251403872	15.406529187935	14.4707619788912	15.8923748354674	18.0287974316073	18.5742825356152
G4V6M9	tr|G4V6M9|G4V6M9_SCHMA Venom allergen-like (VAL) 16 protein OS=Schistosoma mansoni GN=Smp_124070 PE=3 SV=1	2	15.873	0.170105	0.769282	-0.562933	1.47727	FALSE	18.7209625723225	18.954129473569	18.3510507752801	18.5089724116074	19.6343324458373	19.5716363729503
G4V6P1	tr|G4V6P1|G4V6P1_SCHMA Uncharacterized protein Smp_200330 OS=Schistosoma mansoni GN=Smp_200330 PE=4 SV=1	6	28.21	0.00382252	2.41765	-0.850303	1.80288	FALSE	20.2004178071266	19.9182164721538	19.769022689312	20.9296313043878	20.6883008169182	20.8206332817128
G4V6P2	tr|G4V6P2|G4V6P2_SCHMA Putative threonyl-tRNA synthetase OS=Schistosoma mansoni GN=Smp_123990 PE=4 SV=1	10	46.402	0.12824	0.891976	-0.466635	1.38188	FALSE	21.3233683186037	21.3356489202116	20.5812790360306	21.3578953239062	21.5519650621135	21.7303399521638
G4V6P4	tr|G4V6P4|G4V6P4_SCHMA Putative 60s ribosomal protein L23a OS=Schistosoma mansoni GN=Smp_003410 PE=3 SV=1	5	22.008	0.390115	0.408808	-0.331804	1.25859	FALSE	21.9325602383997	20.8842629144047	21.9346943876681	22.2939402994375	21.820568106083	21.6324206733224
G4V6P6	tr|G4V6P6|G4V6P6_SCHMA Serine/threonine kinase OS=Schistosoma mansoni GN=Smp_068060.1 PE=4 SV=1	3	114.55	0.790039	0.102351	-0.0533063	1.03764	FALSE	19.9838944812616	20.2888217184697	20.2660733854028	20.0231638812129	20.2371275159844	20.4384171986035
G4V6P7	tr|G4V6P7|G4V6P7_SCHMA Uncharacterized protein OS=Schistosoma mansoni GN=Smp_068070 PE=4 SV=1	15	68.707	0.0219991	1.65759	0.511108	1.42514	FALSE	19.8614663371679	20.1087877987537	19.9965909348996	19.3502269582078	19.6070839163802	19.4762115042122
G4V6R4	tr|G4V6R4|G4V6R4_SCHMA Putative rab9 and OS=Schistosoma mansoni GN=Smp_067140 PE=4 SV=1	8	23.309	0.59955	0.222174	0.151772	1.11093	FALSE	21.7203902047979	21.5978564295153	20.9256135439663	21.1810506697622	21.067152602317	21.5403411386003
G4V6S0	tr|G4V6S0|G4V6S0_SCHMA Eukaryotic translation initiation factor 3 subunit H OS=Schistosoma mansoni GN=Smp_210570 PE=3 SV=1	4	38.956	0.428005	0.368551	-0.135515	1.09849	FALSE	19.8594192789672	19.6767407949791	19.615372234699	19.7905052121367	19.8332270640569	19.934346022121
G4V6S8	tr|G4V6S8|G4V6S8_SCHMA Uncharacterized protein OS=Schistosoma mansoni GN=Smp_196840 PE=4 SV=1	4	152.83	0.00822053	2.0851	1.90804	3.75299	TRUE	16.9269213982705	16.9005368524264	16.4713619320075	15.3137475094216	13.7519215368154	15.5090349411538
G4V6T2	tr|G4V6T2|G4V6T2_SCHMA Putative cystathionine beta-lyase OS=Schistosoma mansoni GN=Smp_083650 PE=3 SV=1	2	46.42	0.0975478	1.01078	-1.36346	2.57301	FALSE	14.2283307302282	16.869427089247	16.335385738323	17.5222215268404	17.18371839187	16.8175734819638
G4V6T6	tr|G4V6T6|G4V6T6_SCHMA Putative mitochondrial phosphate carrier protein OS=Schistosoma mansoni GN=Smp_083720 PE=3 SV=1	9	34.899	0.322007	0.492135	-0.432503	1.34957	FALSE	21.6130641494187	20.8226412001524	21.8546084225923	22.3465442949621	21.219393119917	22.0218850226204
G4V6T7;G4V6T8	tr|G4V6T7|G4V6T7_SCHMA Uncharacterized protein OS=Schistosoma mansoni GN=Smp_083730.1 PE=4 SV=1;tr|G4V6T8|G4V6T8_SCHMA Uncharacterized protein OS=Schistosoma mansoni GN=Smp_083730.2 PE=4 SV=1	4	32.109	0.00401561	2.39625	-1.04974	2.07016	TRUE	21.5406806950103	21.6007376346542	21.1647379461614	22.1431499351834	22.7284582706288	22.5837799902598
G4V6U4	tr|G4V6U4|G4V6U4_SCHMA Uncharacterized protein OS=Schistosoma mansoni GN=Smp_083800 PE=4 SV=1	4	22.981	7.80718e-07	6.10751	5.54514	46.6932	TRUE	19.7751749822663	19.7701979251758	20.5210370910317	14.6259766897051	14.2728824249109	14.5321256808221
G4V6X0_SCHMASynaptobrevin,putative	tr|G4V6X0|G4V6X0_SCHMA Synaptobrevin, putative|Pfam:PF00957 OS=Schistosoma mansoni GN=Smp_123870 PE=4 SV=1	4	18.193	0.337358	0.471909	-0.256662	1.19471	FALSE	22.3285066168544	21.9241747056765	21.9010493161912	22.7105170794354	22.111140229265	22.10205911367
G4V6X1	tr|G4V6X1|G4V6X1_SCHMA Sh3 domain grb2-like protein B1 (Endophilin B1) OS=Schistosoma mansoni GN=Smp_003230 PE=4 SV=1	16	28.304	1.11267e-05	4.95363	1.96035	3.89156	TRUE	26.1772017235089	26.1692692326447	26.1161528097395	24.1945819863023	24.2485192539606	24.1384801997884
G4V6X6	tr|G4V6X6|G4V6X6_SCHMA Putative collagen alpha-1(V) chain OS=Schistosoma mansoni GN=Smp_123830 PE=4 SV=1	1	160.77	0.0544266	1.26419	0.834125	1.78278	FALSE	14.4121620352049	15.326488355594	15.0700622703934	14.6259766897051	13.6741290930989	14.0062310936638
G4V6X9	tr|G4V6X9|G4V6X9_SCHMA Putative sorting nexin OS=Schistosoma mansoni GN=Smp_003140.1 PE=4 SV=1	15	43.095	0.0225634	1.64659	0.605615	1.52163	FALSE	21.2728768527511	21.3688736293828	21.4898935626954	20.4751363907706	20.8387259214115	21.0009358059116
G4V6Y4;G4V6Y3	tr|G4V6Y4|G4V6Y4_SCHMA Nadrin-like protein OS=Schistosoma mansoni GN=Smp_003110.2 PE=4 SV=1;tr|G4V6Y3|G4V6Y3_SCHMA Nadrin-like protein OS=Schistosoma mansoni GN=Smp_003110.1 PE=4 SV=1	4	27.203	0.540808	0.266957	-0.133671	1.09708	FALSE	22.1977504922113	22.4999212730113	22.0670908478701	22.5159148797447	22.516755535219	22.1331060745747
G4V6Y5	tr|G4V6Y5|G4V6Y5_SCHMA Kettin/titin-related protein OS=Schistosoma mansoni GN=Smp_197080 PE=4 SV=1	16	89.738	0.0327605	1.48465	-0.541545	1.45553	FALSE	23.3731308887501	23.412670442326	22.9500132285669	23.8240383163943	23.881850476984	23.6545596505917
G4V6Y7	tr|G4V6Y7|G4V6Y7_SCHMA Putative kynurenine aminotransferase OS=Schistosoma mansoni GN=Smp_123750 PE=4 SV=1	14	110.87	0.265853	0.575358	-0.190402	1.14108	FALSE	20.7778049386348	20.6071858682614	20.8380107727301	20.9646215815016	20.9344924915167	20.8950922739133
G4V6Y8	tr|G4V6Y8|G4V6Y8_SCHMA Uncharacterized protein Smp_200440 OS=Schistosoma mansoni GN=Smp_200440 PE=4 SV=1	3	18.261	0.638176	0.195059	-0.255734	1.19394	FALSE	19.4569644080663	17.92988365651	18.4276197262303	19.4018810495209	19.1174630819656	18.062326984342
G4V6Z5	tr|G4V6Z5|G4V6Z5_SCHMA Transmembrane 9 superfamily member OS=Schistosoma mansoni GN=Smp_162040 PE=3 SV=1	3	32.799	0.317679	0.498011	1.33376	2.52059	FALSE	18.4019184862014	17.3051247427651	19.2701161878861	18.01683677514	14.2728824249109	18.6861551224633
G4V6Z7	tr|G4V6Z7|G4V6Z7_SCHMA Actin-related protein 2/3 complex subunit 5 OS=Schistosoma mansoni GN=Smp_073720.1 PE=3 SV=1	4	17.345	0.0186494	1.72934	-0.621894	1.53889	FALSE	21.5815659524171	21.9968748390709	21.9019913049882	22.3078378923946	22.640172230657	22.3981047835648
G4V705	tr|G4V705|G4V705_SCHMA Putative methionyl-tRNA synthetase OS=Schistosoma mansoni GN=Smp_073620 PE=4 SV=1	15	32.899	0.290183	0.537328	-0.205798	1.15332	FALSE	22.8339304660648	22.7621109669587	22.6870053890117	22.7564504087162	23.1726931409632	22.9712985112101
G4V708	tr|G4V708|G4V708_SCHMA Putative platelet-activating factor acetylhydrolase ib OS=Schistosoma mansoni GN=Smp_073600 PE=4 SV=1	7	25.199	0.20069	0.697474	-0.225094	1.16885	FALSE	22.314395708997	22.1337817263783	22.0690491786105	22.3777880782485	22.4399116698511	22.3748101980715
G4V709	tr|G4V709|G4V709_SCHMA GTP-binding protein-like protein OS=Schistosoma mansoni GN=Smp_073590 PE=3 SV=1	8	22.5	0.0673007	1.17198	-0.469223	1.38436	FALSE	22.3627400686725	22.8852218936678	22.4160386099108	22.8529857220346	23.147391025837	23.0712930207483
G4V713	tr|G4V713|G4V713_SCHMA Putative eukaryotictranslation initiation factor 3 subunit OS=Schistosoma mansoni GN=Smp_006000 PE=4 SV=1	4	27.434	0.0912132	1.03994	0.676359	1.5981	FALSE	19.2034531542101	20.3164652608747	20.1119143743624	18.930299414667	19.4330658342766	19.2393911590639
G4V714	tr|G4V714|G4V714_SCHMA Putative eukaryotictranslation initiation factor 3 subunit OS=Schistosoma mansoni GN=Smp_101200 PE=4 SV=1	1	13.421	0.49369	0.306546	0.156307	1.11443	FALSE	18.9550793068031	18.8561669977832	18.3538991375891	18.6811590521368	18.5058927079238	18.5091740271749
G4V720	tr|G4V720|G4V720_SCHMA RNA helicase OS=Schistosoma mansoni GN=Smp_125330 PE=3 SV=1	2	169.99	0.138771	0.857702	-2.33217	5.03563	FALSE	14.2283307302282	15.1958201750958	14.4707619788912	15.0443720771912	20.2177174821779	15.629338279094
G4V721;Q9XYR4	tr|G4V721|G4V721_SCHMA Putative phosphoenolpyruvate carboxykinase OS=Schistosoma mansoni GN=Smp_005880 PE=3 SV=1;tr|Q9XYR4|Q9XYR4_SCHMA Phosphoenolpyruvate carboxykinase OS=Schistosoma mansoni PE=2 SV=1	28	70.39	0.0157822	1.80183	-0.584373	1.49939	FALSE	22.1871862145906	22.4179660451131	22.6088004549325	23.0067026345137	22.9574381803408	23.0029294291311
G4V725;G4V724;G4V723	tr|G4V725|G4V725_SCHMA Uncharacterized protein OS=Schistosoma mansoni GN=Smp_005860.1 PE=4 SV=1;tr|G4V724|G4V724_SCHMA Uncharacterized protein OS=Schistosoma mansoni GN=Smp_005860.3 PE=4 SV=1;tr|G4V723|G4V723_SCHMA Uncharacterized protein OS=Schistosoma ma	14	45.153	0.0166506	1.77857	0.753033	1.68533	FALSE	24.4861812632024	23.9480207361378	24.6619807217374	23.6372532421156	23.540454748617	23.6593742853183
G4V734	tr|G4V734|G4V734_SCHMA Putative gtp-binding protein (Q) alpha-11 subunit, gna11 OS=Schistosoma mansoni GN=Smp_005790 PE=4 SV=1	11	41.63	0.0601503	1.22076	0.365911	1.2887	FALSE	22.776243980322	22.8202877193858	22.6518317032985	22.2566914458487	22.4354939107645	22.4584452214064
G4V739;C4PYI6	tr|G4V739|G4V739_SCHMA Uncharacterized protein OS=Schistosoma mansoni GN=Smp_125220 PE=4 SV=1;tr|C4PYI6|C4PYI6_SCHMA Aquaporin OS=Schistosoma mansoni GN=AQP1 PE=2 SV=1	1	7.8879	0.0190467	1.72018	0.623182	1.54027	FALSE	21.1105638088895	20.6694061797824	20.6792195454698	20.1250359035187	20.1223631418789	20.3422448109442
G4V740	tr|G4V740|G4V740_SCHMA Putative aquaporin-3 OS=Schistosoma mansoni GN=Smp_005720 PE=3 SV=1	3	33.903	0.0281403	1.55067	0.908104	1.87658	FALSE	22.3690761933763	21.8762091437263	22.6775931474776	21.5203886319291	20.9157269590305	21.7624518175485
G4V755	tr|G4V755|G4V755_SCHMA Putative clathrin coat assembly protein ap-1 OS=Schistosoma mansoni GN=Smp_064240 PE=3 SV=1	6	48.681	0.605404	0.217954	-0.1043	1.07497	FALSE	17.9923543949579	18.2108701418428	17.907090902641	17.9242841977133	18.1398228859426	18.3591083136903
G4V767	tr|G4V767|G4V767_SCHMA Putative cornichon OS=Schistosoma mansoni GN=Smp_082990 PE=4 SV=1	2	30.101	0.682856	0.165671	-0.0925662	1.06627	FALSE	18.7650377885365	19.2369893640723	18.8812117046865	19.1691149545486	18.781785678707	19.2100367567409
G4V768	tr|G4V768|G4V768_SCHMA Putative wd-repeat protein OS=Schistosoma mansoni GN=Smp_167150 PE=4 SV=1	3	41.983	0.574593	0.24064	0.204365	1.15218	FALSE	20.0985172745873	20.07152813578	19.1911675825045	19.8323786533452	19.8133017206174	19.1024362943246
G4V774	tr|G4V774|G4V774_SCHMA Putative inhibitor of apoptosis (Iap) domain family member OS=Schistosoma mansoni GN=Smp_083030 PE=3 SV=1	5	31.754	0.205782	0.686594	0.436836	1.35363	FALSE	20.1952626891931	20.4107976664166	20.6444630615671	20.1578861660648	20.3994523445009	19.382677312561
G4V776;G4V775	tr|G4V776|G4V776_SCHMA Adducin related protein OS=Schistosoma mansoni GN=Smp_083040.2 PE=4 SV=1;tr|G4V775|G4V775_SCHMA Adducin related protein OS=Schistosoma mansoni GN=Smp_083040.1 PE=4 SV=1	14	59.611	0.473363	0.324806	-0.12995	1.09426	FALSE	22.0267433629516	21.9706807791384	22.2991044439725	22.2097130168717	22.1616911748808	22.314974758973
G4V779;G4V780	tr|G4V779|G4V779_SCHMA Elongation factor Tu OS=Schistosoma mansoni GN=Smp_073500.1 PE=3 SV=1;tr|G4V780|G4V780_SCHMA Elongation factor Tu OS=Schistosoma mansoni GN=Smp_073500.2 PE=3 SV=1	18	47.457	0.00896027	2.04768	-0.598546	1.51419	FALSE	22.1455387759156	22.248175881644	22.2379681476749	22.7087008998437	22.7710781824951	22.9475418751281
G4V785	tr|G4V785|G4V785_SCHMA Putative prefoldin subunit OS=Schistosoma mansoni GN=Smp_073540 PE=4 SV=1	5	20.549	0.248913	0.603952	-0.495187	1.4095	FALSE	20.2243549312371	20.1093528697817	19.0532863942651	20.3300490762702	20.6767390874653	19.8657681944333
G4V790	tr|G4V790|G4V790_SCHMA Deoxyuridine 5-triphosphate nucleotidohydrolase OS=Schistosoma mansoni GN=Smp_079240 PE=4 SV=1	5	16.811	0.0344824	1.4624	-2.5649	5.91713	FALSE	17.9680914962777	17.5634944347238	14.4707619788912	19.0304939872587	19.7695172421398	18.8970261817644
G4V793;G4V792	tr|G4V793|G4V793_SCHMA GTP-binding nuclear protein OS=Schistosoma mansoni GN=Smp_079430.2 PE=3 SV=1;tr|G4V792|G4V792_SCHMA Putative ran OS=Schistosoma mansoni GN=Smp_079430.1 PE=4 SV=1	9	24.859	0.283532	0.547398	0.272771	1.20813	FALSE	23.1655089415944	23.4423543362322	22.8494090767831	22.6031630086456	23.0705338139528	22.9652627227751
G4V7A8	tr|G4V7A8|G4V7A8_SCHMA Transmembrane protein tmp21-related OS=Schistosoma mansoni GN=Smp_079310 PE=3 SV=1	4	24.1	0.235479	0.628047	-0.414947	1.33325	FALSE	21.7712210365481	22.6276926137343	21.9509806845985	22.458805441426	22.9472231375555	22.1887080921465
G4V7B4;G4V7B3	tr|G4V7B4|G4V7B4_SCHMA Putative rna binding motif protein 4,lark OS=Schistosoma mansoni GN=Smp_079290.1 PE=4 SV=1;tr|G4V7B3|G4V7B3_SCHMA Putative rna binding motif protein 4,lark OS=Schistosoma mansoni GN=Smp_079290.3 PE=4 SV=1	11	32.245	0.019591	1.70794	0.646546	1.56542	FALSE	22.3730221865921	22.7031849036251	22.3806028965782	21.6044194077156	21.8210248478684	22.0917269695542
G4V7B6	tr|G4V7B6|G4V7B6_SCHMA Crp-related OS=Schistosoma mansoni GN=Smp_079270 PE=4 SV=1	2	8.8783	0.0136939	1.86347	-0.54442	1.45843	FALSE	21.7223967647698	21.8467001434411	21.5913874895049	22.2018584174656	22.2992575327692	22.2926299010674
G4V7C7	tr|G4V7C7|G4V7C7_SCHMA Uncharacterized protein OS=Schistosoma mansoni GN=Smp_194860 PE=4 SV=1	6	10.866	0.000669941	3.17396	1.39579	2.63132	TRUE	25.3791307569444	25.0452564538778	24.91005151196	23.6619337910471	23.9828508742942	23.5022985307513
G4V7D6	tr|G4V7D6|G4V7D6_SCHMA Putative ATPase OS=Schistosoma mansoni GN=Smp_167200 PE=4 SV=1	4	66.115	0.0270095	1.56848	-1.46623	2.76299	FALSE	15.2974548124878	16.6244780712368	17.3064985679476	17.8303565488142	17.890054399753	17.9067050185949
G4V7D8;G4V7D7	tr|G4V7D8|G4V7D8_SCHMA Uncharacterized protein OS=Schistosoma mansoni GN=Smp_083080.1 PE=4 SV=1;tr|G4V7D7|G4V7D7_SCHMA Uncharacterized protein OS=Schistosoma mansoni GN=Smp_083080.2 PE=4 SV=1	11	38.515	0.859565	0.0657212	0.0276711	1.01937	FALSE	22.4426788553901	22.4171644622083	22.4681684314776	22.3643535238475	22.5156037954281	22.3650411255019
G4V7E5	tr|G4V7E5|G4V7E5_SCHMA Uncharacterized protein OS=Schistosoma mansoni GN=Smp_167230 PE=4 SV=1	8	37.552	0.209455	0.67891	-0.412293	1.3308	FALSE	19.5050156533192	20.5045728812355	19.9597152656421	20.3564046796811	20.2216434995992	20.6281337467759
G4V7F5;G4V7F4	tr|G4V7F5|G4V7F5_SCHMA Ubiquitin carboxyl-terminal hydrolase OS=Schistosoma mansoni GN=Smp_083200.1 PE=3 SV=1;tr|G4V7F4|G4V7F4_SCHMA Ubiquitin carboxyl-terminal hydrolase OS=Schistosoma mansoni GN=Smp_083200.2 PE=3 SV=1	8	35.659	0.0827119	1.08243	-0.631007	1.54865	FALSE	18.68519687329	19.6959635022738	19.5416940432099	19.7760086158475	19.9598769918576	20.0799908922907
G4V7G0	tr|G4V7G0|G4V7G0_SCHMA COP9 signalosome subunit 6 (M67 family) OS=Schistosoma mansoni GN=Smp_126690 PE=4 SV=1	1	35.86	0.158663	0.799525	-1.45074	2.73349	FALSE	17.7834758783537	17.671103687452	14.4707619788912	18.0341119707135	18.222127737656	18.02133658627
G4V7G3	tr|G4V7G3|G4V7G3_SCHMA Proteasome assembly chaperone 2 OS=Schistosoma mansoni GN=Smp_126670 PE=3 SV=1	3	29.848	0.00199576	2.69989	0.995329	1.99354	FALSE	17.8428903066747	18.2128043547267	18.0193404082605	16.851316901674	17.2313204222623	17.0064102547992
G4V7G8	tr|G4V7G8|G4V7G8_SCHMA Putative adenosine kinase OS=Schistosoma mansoni GN=Smp_008360 PE=1 SV=1	4	39.392	0.000136427	3.8651	-1.56133	2.95125	TRUE	18.1357438157096	18.2537195115777	17.828017569473	19.5799045838066	19.7264604714159	19.5951002279613
G4V7H0	tr|G4V7H0|G4V7H0_SCHMA Putative pap-inositol-1,4-phosphatase OS=Schistosoma mansoni GN=Smp_008320 PE=4 SV=1	10	35.399	0.236447	0.626266	0.229885	1.17274	FALSE	21.70863649917	21.3698299643766	21.5865618473996	21.4412878956771	21.3374311447298	21.1966544054227
G4V7H6	tr|G4V7H6|G4V7H6_SCHMA Putative glycogen synthase kinase 3-related (Gsk3) OS=Schistosoma mansoni GN=Smp_008260 PE=3 SV=1	4	52.711	0.935939	0.0287525	0.0269106	1.01883	FALSE	16.4904228908337	17.6023768081307	17.2472451642064	16.8731265400397	17.07721838868	17.3089681829193
G4V7H8	tr|G4V7H8|G4V7H8_SCHMA Putative rab-18 OS=Schistosoma mansoni GN=Smp_008230 PE=4 SV=1	4	23.993	0.214501	0.66857	1.17602	2.25953	FALSE	17.5679265845853	17.4190998324689	18.2811396299085	14.6259766897051	17.3317477302702	17.7823821627306
G4V7J0	tr|G4V7J0|G4V7J0_SCHMA Uncharacterized protein OS=Schistosoma mansoni GN=Smp_126540 PE=4 SV=1	32	152.1	0.639981	0.193833	0.09156	1.06552	FALSE	22.5658880572154	22.3157044940386	22.6713914556949	22.2293363697323	22.5082013535323	22.5407664101441
G4V7J3	tr|G4V7J3|G4V7J3_SCHMA Putative ubiquitin fusion degradaton protein OS=Schistosoma mansoni GN=Smp_196510 PE=4 SV=1	8	32.844	0.675943	0.17009	0.10676	1.07681	FALSE	20.1967374606386	20.208562763631	19.4991673601904	19.7827326350639	19.8456113045506	19.9558425642569
G4V7J7;G4V7J8;G4V7J9	tr|G4V7J7|G4V7J7_SCHMA V-type proton ATPase subunit a OS=Schistosoma mansoni GN=Smp_040970.1 PE=3 SV=1;tr|G4V7J8|G4V7J8_SCHMA V-type proton ATPase subunit a OS=Schistosoma mansoni GN=Smp_040970.3 PE=3 SV=1;tr|G4V7J9|G4V7J9_SCHMA V-type proton ATPase subuni	12	98.399	0.362116	0.441152	0.41524	1.33352	FALSE	19.1782931029532	18.7613240662169	19.8999102585045	19.0713205941845	18.1792127081484	19.3432735464329
G4V7M3;G4V7M2	tr|G4V7M3|G4V7M3_SCHMA Putative propionyl-CoA carboxylase alpha subunit OS=Schistosoma mansoni GN=Smp_165400.1 PE=4 SV=1;tr|G4V7M2|G4V7M2_SCHMA Putative propionyl-CoA carboxylase alpha subunit OS=Schistosoma mansoni GN=Smp_165400.3 PE=4 SV=1	5	102.14	8.18585e-05	4.08694	-2.2973	4.91538	TRUE	14.2283307302282	13.6633201636553	14.4707619788912	16.3894184771918	16.3990445155113	16.4658581597092
G4V7P2;G4V7P3	tr|G4V7P2|G4V7P2_SCHMA Uncharacterized protein OS=Schistosoma mansoni GN=Smp_035560.2 PE=4 SV=1;tr|G4V7P3|G4V7P3_SCHMA Uncharacterized protein OS=Schistosoma mansoni GN=Smp_035560.1 PE=4 SV=1	9	17.557	0.406481	0.39096	0.199732	1.14849	FALSE	26.3420054082979	26.4296347695854	25.8540355855899	25.8438984754456	26.2160218079181	25.9665582335
G4V7P4	tr|G4V7P4|G4V7P4_SCHMA Serine/threonine-protein phosphatase OS=Schistosoma mansoni GN=Smp_035580 PE=3 SV=1	9	36.865	0.538716	0.26864	0.216367	1.1618	FALSE	19.8621945132914	20.0689865770568	21.046117743703	20.0597732634482	20.1208800319658	20.1475451354428
G4V7P9	tr|G4V7P9|G4V7P9_SCHMA Uncharacterized protein OS=Schistosoma mansoni GN=Smp_141330 PE=4 SV=1	2	37.405	0.14459	0.83986	0.583281	1.49825	FALSE	18.0715482422492	17.2373247575507	17.7607900863021	16.5044331517683	17.4246754935716	17.3907119478575
G4V7Q4	tr|G4V7Q4|G4V7Q4_SCHMA Pyruvate carboxylase OS=Schistosoma mansoni GN=Smp_141360 PE=4 SV=1	36	132.3	0.0387121	1.41215	-0.614751	1.53129	FALSE	21.168643600921	20.7951873282424	20.7490244101647	21.8233191264289	21.1975151715068	21.5362754064976
G4V7Q9	tr|G4V7Q9|G4V7Q9_SCHMA Putative adenosine deaminase OS=Schistosoma mansoni GN=Smp_035700 PE=4 SV=1	7	39.27	1.61272e-06	5.79244	5.43194	43.1694	TRUE	19.3637852600026	19.9951322690216	20.3678753979214	14.6259766897051	14.2728824249109	14.5321256808221
G4V7R0	tr|G4V7R0|G4V7R0_SCHMA Innexin OS=Schistosoma mansoni GN=inx PE=3 SV=1	7	49.12	0.0111883	1.95124	0.637858	1.55602	FALSE	19.4670417187166	19.5647867530293	19.6564953989006	19.0537522010463	18.700416205967	19.020582838671
G4V7R2;G4V7R4;G4V7R1;G4V7R3	tr|G4V7R2|G4V7R2_SCHMA Innexin OS=Schistosoma mansoni GN=inx PE=3 SV=1;tr|G4V7R4|G4V7R4_SCHMA Innexin OS=Schistosoma mansoni GN=inx PE=3 SV=1;tr|G4V7R1|G4V7R1_SCHMA Innexin OS=Schistosoma mansoni GN=inx PE=3 SV=1;tr|G4V7R3|G4V7R3_SCHMA Innexin OS=Schistoso	17	52.475	0.0155565	1.80809	-0.661786	1.58204	FALSE	22.3568982462575	22.5278085258923	22.7995421676008	23.1603940781115	23.08072552321	23.4284859892984
G4V7R9	tr|G4V7R9|G4V7R9_SCHMA Dolichyl-diphosphooligosaccharide--protein glycosyltransferase 48 kDa subunit OS=Schistosoma mansoni GN=Smp_035470 PE=3 SV=1	13	48.681	0.0703583	1.15268	0.481484	1.39618	FALSE	22.1851135765417	22.3944747345643	22.3696640214559	21.6407408444342	21.6468217471032	22.2172380628947
G4V7S7	tr|G4V7S7|G4V7S7_SCHMA Putative nucleobindin OS=Schistosoma mansoni GN=Smp_144560 PE=4 SV=1	2	43.253	0.1374	0.862012	1.56215	2.95293	FALSE	17.7489099321158	18.0508942872933	16.4985198198087	15.6494610124464	14.2728824249109	17.6895342914401
G4V7U3	tr|G4V7U3|G4V7U3_SCHMA 40S ribosomal protein S8 OS=Schistosoma mansoni GN=Smp_054780 PE=3 SV=1	5	24.857	0.459005	0.338183	-0.386294	1.30703	FALSE	18.7237954358971	17.685513877298	19.279352531921	19.3696668390315	18.3031751591582	19.1747020765244
G4V7U5;G4V7U4	tr|G4V7U5|G4V7U5_SCHMA Putative microtubule associated protein xmap215 OS=Schistosoma mansoni GN=Smp_054790.1 PE=4 SV=1;tr|G4V7U4|G4V7U4_SCHMA Putative microtubule associated protein xmap215 OS=Schistosoma mansoni GN=Smp_054790.2 PE=4 SV=1	5	214.63	0.00533417	2.27293	-1.87374	3.6648	TRUE	14.3080098730958	13.2373515856609	14.6641000829552	16.2909781879216	16.1333351580922	15.4063563250796
G4V7U6	tr|G4V7U6|G4V7U6_SCHMA Related to multifunctional cyclin-dependent kinase-related OS=Schistosoma mansoni GN=Smp_054800 PE=4 SV=1	2	60.599	0.0323035	1.49075	0.916339	1.88732	FALSE	18.0108045829959	17.2716775774565	18.2976974134635	17.2886457961854	16.6059358433076	16.9365806620963
G4V7W1	tr|G4V7W1|G4V7W1_SCHMA Putative pinch OS=Schistosoma mansoni GN=Smp_165070 PE=4 SV=1	3	18.553	0.112758	0.947853	0.434321	1.35127	FALSE	19.2263298734222	19.8744492337041	19.8324876703593	19.3097219102623	19.0425188728677	19.2780628561821
G4V7W2	tr|G4V7W2|G4V7W2_SCHMA Putative chromodomain helicase DNA binding protein OS=Schistosoma mansoni GN=Smp_079650 PE=4 SV=1	2	224.33	0.0158434	1.80015	-0.907732	1.87609	FALSE	17.2318549623371	18.1275002164919	17.4105991664966	18.3705335355132	18.6231490444127	18.499469123852
G4V7X4	tr|G4V7X4|G4V7X4_SCHMA Putative ctl2 OS=Schistosoma mansoni GN=Smp_160740 PE=3 SV=1	9	64.916	0.324312	0.489037	0.311923	1.24136	FALSE	19.8042795386855	19.5673901533608	19.6421347101569	19.3411449746161	18.8476152349189	19.889274947318
G4V7X6	tr|G4V7X6|G4V7X6_SCHMA Serine/threonine kinase OS=Schistosoma mansoni GN=Smp_160760 PE=4 SV=1	7	120.98	0.597694	0.223521	-0.124706	1.09029	FALSE	17.3365283646189	17.4311710222439	17.445820493795	17.836262292812	17.1344919729001	17.6168837512259
G4V7X7	tr|G4V7X7|G4V7X7_SCHMA Actin-related protein 2/3 complex subunit 4 OS=Schistosoma mansoni GN=Smp_160770.1 PE=3 SV=1	5	19.651	0.707501	0.150273	0.131917	1.09575	FALSE	21.843298393006	21.6154880860196	21.2557937267248	21.7125381328235	21.820720369412	20.7855696320181
G4V7X9	tr|G4V7X9|G4V7X9_SCHMA Adducin related protein OS=Schistosoma mansoni GN=Smp_071140 PE=4 SV=1	16	86.545	0.276569	0.558196	0.269915	1.20574	FALSE	20.7841954433304	20.3964783040778	21.0230684911892	20.5713064113682	20.2465654758223	20.5761244219775
G4V7Y0	tr|G4V7Y0|G4V7Y0_SCHMA Formin binding protein and related proteins OS=Schistosoma mansoni GN=Smp_071150 PE=4 SV=1	10	65.288	0.454182	0.34277	0.220807	1.16539	FALSE	19.8346410949475	19.4206511838038	18.8692844410908	19.2496067446238	19.0180548934514	19.194493799784
G4V7Y4;G4V7Y3	tr|G4V7Y4|G4V7Y4_SCHMA Serine/threonine protein phosphatase 2A regulatory subunit OS=Schistosoma mansoni GN=Smp_035430.2 PE=3 SV=1;tr|G4V7Y3|G4V7Y3_SCHMA Serine/threonine protein phosphatase 2A regulatory subunit OS=Schistosoma mansoni GN=Smp_035430.1 PE=3	7	56.536	0.281335	0.550776	0.435608	1.35248	FALSE	20.6730104358401	19.953108891296	21.0385706863533	20.4869314262515	19.6059535128917	20.2649814072518
G4V7Z3;G4V7Z4	tr|G4V7Z3|G4V7Z3_SCHMA Putative snare protein sec22 OS=Schistosoma mansoni GN=Smp_035300.1 PE=3 SV=1;tr|G4V7Z4|G4V7Z4_SCHMA Putative snare protein sec22 OS=Schistosoma mansoni GN=Smp_035300.2 PE=3 SV=1	6	22.16	0.746561	0.126935	0.0567462	1.04012	FALSE	20.9431060599959	20.9945206318429	20.918105738779	20.7805112431402	21.1017102040809	20.8032724294207
G4V7Z7;G4V7Z8	tr|G4V7Z7|G4V7Z7_SCHMA Malate dehydrogenase OS=Schistosoma mansoni GN=Smp_035270.2 PE=3 SV=1;tr|G4V7Z8|G4V7Z8_SCHMA Malate dehydrogenase OS=Schistosoma mansoni GN=Smp_035270.1 PE=3 SV=1	18	36.198	0.00257855	2.58863	-0.771056	1.70652	FALSE	24.1915845608599	24.0497887707507	24.2483134224492	25.0014137692867	24.9478593444783	24.8535817777585
G4V7Z9	tr|G4V7Z9|G4V7Z9_SCHMA Epidermal growth factor receptor kinase substrate eps8-related protein OS=Schistosoma mansoni GN=Smp_035260.1 PE=4 SV=1	11	50.188	7.10558e-05	4.1484	2.13656	4.39714	TRUE	22.5769724661345	22.133406356901	22.731423659108	20.3786368568366	20.1564225073706	20.4970486008967
G4V802	tr|G4V802|G4V802_SCHMA Uncharacterized protein OS=Schistosoma mansoni GN=Smp_035210 PE=4 SV=1	43	104.94	0.00476054	2.32234	-0.802549	1.74418	FALSE	21.8719275481639	21.819657920168	21.6127375245135	22.420625796002	22.4929471687603	22.7983982914756
G4V805;G4V804;G4V806;G4V803	tr|G4V805|G4V805_SCHMA Putative hsp40, subfamily A, members 1,2,4 OS=Schistosoma mansoni GN=Smp_035200.4 PE=3 SV=1;tr|G4V804|G4V804_SCHMA Putative hsp40, subfamily A, members 1,2,4 OS=Schistosoma mansoni GN=Smp_035200.3 PE=4 SV=1;tr|G4V806|G4V806_SCHMA Put	20	45.224	0.226742	0.644468	-0.377684	1.29925	FALSE	23.7413211703395	23.5438282208018	24.4648520421709	24.2121325087981	24.1938020842515	24.4771187446059
G4V823	tr|G4V823|G4V823_SCHMA Putative phospholipase DDHD1 OS=Schistosoma mansoni GN=Smp_141150 PE=4 SV=1	2	83.678	0.656564	0.182723	-0.337201	1.2633	FALSE	16.3565288408959	17.2145656445494	14.5557764265983	16.1606370378697	17.0913222820443	15.886513212078
G4V824	tr|G4V824|G4V824_SCHMA Uncharacterized protein OS=Schistosoma mansoni GN=Smp_035040 PE=4 SV=1	1	31.582	0.703927	0.152472	0.0828757	1.05913	FALSE	17.1505826584435	16.9635188968017	16.8044329276704	17.1883675676075	16.6731849650527	16.8083549519344
G4V825	tr|G4V825|G4V825_SCHMA Putative atp-dependent RNA helicase OS=Schistosoma mansoni GN=Smp_035030 PE=4 SV=1	20	145.19	0.316358	0.499821	0.788016	1.7267	FALSE	19.2542891694287	17.5507770703707	19.060025797965	19.0226627424221	16.6831346254603	17.7952455518059
G4V838;G4V839;G4V840;O17460;O17459	tr|G4V838|G4V838_SCHMA Uncharacterized protein OS=Schistosoma mansoni GN=Smp_034940.1 PE=4 SV=1;tr|G4V839|G4V839_SCHMA Uncharacterized protein OS=Schistosoma mansoni GN=Smp_034940.2 PE=4 SV=1;tr|G4V840|G4V840_SCHMA Uncharacterized protein OS=Schistosoma ma	12	88.594	0.172375	0.763526	-0.631431	1.5491	FALSE	19.0159096959306	18.1845012383217	17.54772555388	19.2354041927885	18.8312030341637	18.5758226344979
G4V841	tr|G4V841|G4V841_SCHMA Putative DNAj (Hsp40) homolog, subfamily B, member OS=Schistosoma mansoni GN=Smp_141080 PE=4 SV=1	6	41.95	0.0020004	2.69888	-1.47808	2.78577	TRUE	18.443300215693	18.3618538861389	19.1114529421186	20.4022021550534	19.7804241804955	20.1682108616379
G4V844	tr|G4V844|G4V844_SCHMA AP complex subunit beta OS=Schistosoma mansoni GN=Smp_034870 PE=3 SV=1	19	95.869	0.285322	0.544664	-0.4462	1.36245	FALSE	21.265634451198	21.290371445912	20.0488137076818	21.573417992928	21.1342347108332	21.2357662952451
G4V846	tr|G4V846|G4V846_SCHMA Twik family of potassium channels-related OS=Schistosoma mansoni GN=Smp_034850 PE=3 SV=1	3	34.604	0.857121	0.0669578	-0.0430827	1.03031	FALSE	19.8503275815406	19.48479329184	19.1036132244973	19.5015109214357	19.4738749075734	19.5925964281668
G4V848	tr|G4V848|G4V848_SCHMA Mps one binder kinase activator-like 2 (Mob1 homolog 2) (Protein mob3) OS=Schistosoma mansoni GN=Smp_095470 PE=4 SV=1	2	25.701	0.503314	0.298161	0.36006	1.28348	FALSE	18.0072230263614	18.6106850928755	17.2940183468007	18.517297001767	17.0918270562144	17.2226215748706
G4V850	tr|G4V850|G4V850_SCHMA Putative dynein light chain OS=Schistosoma mansoni GN=Smp_174510 PE=4 SV=1	3	11.888	0.000142252	3.84694	3.53904	11.6241	TRUE	22.9634819839514	22.6730523222088	23.5213691649291	20.2956869980336	19.2985033424291	18.9465822572272
G4V856	tr|G4V856|G4V856_SCHMA Family M1 non-peptidase homologue (M01 family) OS=Schistosoma mansoni GN=Smp_174540 PE=4 SV=1	5	46.587	0.0746877	1.12675	1.21596	2.32296	FALSE	17.0689737244285	17.9677023847214	17.943108411544	15.4722422390457	17.5343586231787	16.3252895803631
G4V857	tr|G4V857|G4V857_SCHMA Aminopeptidase A (M01 family) OS=Schistosoma mansoni GN=Smp_173030 PE=4 SV=1	4	56.244	0.532246	0.273888	0.264855	1.20152	FALSE	18.8643613731774	18.0217258752987	18.5028561123225	17.4476734991458	18.4207030589866	18.726001588171
G4V867	tr|G4V867|G4V867_SCHMA Putative cop-coated vesicle membrane protein P24 (Emp24/gp25l family) OS=Schistosoma mansoni GN=Smp_154960.1 PE=3 SV=1	4	25.013	0.105788	0.975565	0.392444	1.31262	FALSE	22.4638350430119	22.406050679021	22.1326278641438	21.8653126254464	21.729796709497	22.2300721630505
G4V874	tr|G4V874|G4V874_SCHMA Uncharacterized protein OS=Schistosoma mansoni GN=Smp_114430 PE=4 SV=1	1	13.528	0.39886	0.399179	-1.29423	2.45247	FALSE	19.6981492185232	19.6099729758871	14.4707619788912	19.4053452128736	19.3179421362085	18.9382954578008
G4V878	tr|G4V878|G4V878_SCHMA Putative neuroendocrine convertase 2 (EC 3.4.21.94) (NEC 2) (PC2) (Prohormone convertase 2) (Proprotein convertase 2) (KEX2-like endoprotease 2) OS=Schistosoma mansoni GN=Smp_077980 PE=3 SV=1	2	72.707	0.779573	0.108143	0.0904488	1.0647	FALSE	17.166224243573	17.3051247427651	18.1328218021831	17.2823517669519	17.7325265175796	17.3179461394784
G4V890;G4V889;G4V888	tr|G4V890|G4V890_SCHMA Uncharacterized protein OS=Schistosoma mansoni GN=Smp_006830.2 PE=4 SV=1;tr|G4V889|G4V889_SCHMA Uncharacterized protein OS=Schistosoma mansoni GN=Smp_006830.1 PE=4 SV=1;tr|G4V888|G4V888_SCHMA Uncharacterized protein OS=Schistosoma ma	2	21.723	0.684935	0.164351	0.145507	1.10612	FALSE	18.2406513275666	18.9642282445374	17.741132827004	18.0409249488148	18.0339549942449	18.4346110297912
G4V895	tr|G4V895|G4V895_SCHMA Uncharacterized protein OS=Schistosoma mansoni GN=Smp_006860.2 PE=4 SV=1	10	20.938	0.287716	0.541036	-0.231858	1.17435	FALSE	24.3073877072704	24.2818950119525	24.2126142819805	24.6916934483811	24.6364034975735	24.1693739371465
G4V8A5	tr|G4V8A5|G4V8A5_SCHMA Putative spectrin beta chain, brain 4 (Spectrin, non-erythroid beta chain 4) (Beta-V spectrin) (BSPECV) OS=Schistosoma mansoni GN=Smp_196570 PE=4 SV=1	128	282.37	0.295958	0.52877	-0.17178	1.12645	FALSE	23.9828797962996	23.9783299046566	23.9429367972011	24.1275141353912	24.0568642123578	24.2351095070103
G4V8A7	tr|G4V8A7|G4V8A7_SCHMA Putative collagen alpha-1(V) chain OS=Schistosoma mansoni GN=Smp_170330 PE=3 SV=1	13	295.97	0.534137	0.272347	-0.193699	1.14369	FALSE	19.5313013528189	19.4389440380164	20.2788208053415	19.90632204437	19.676469887135	20.2473718434542
G4V8A8	tr|G4V8A8|G4V8A8_SCHMA Putative collagen alpha-1(V) chain OS=Schistosoma mansoni GN=Smp_170340 PE=3 SV=1	7	176.75	0.746533	0.126951	0.0671249	1.04763	FALSE	20.2753798648078	20.2271163055854	20.4654097286393	20.441537864497	19.957247744976	20.3677456614898
G4V8B3	tr|G4V8B3|G4V8B3_SCHMA Uncharacterized protein OS=Schistosoma mansoni GN=Smp_020450 PE=4 SV=1	7	55.41	0.0845796	1.07273	0.482234	1.3969	FALSE	19.7349531732433	19.7603325432373	19.7788675483988	18.9004785942856	19.248921007756	19.6780520418212
G4V8B4	tr|G4V8B4|G4V8B4_SCHMA Putative arginyl-tRNA synthetase OS=Schistosoma mansoni GN=Smp_133280 PE=3 SV=1	23	71.361	0.131238	0.88194	-0.385863	1.30664	FALSE	20.8321918982109	20.9675676226793	20.3776149571281	20.9107974834032	21.1901678118177	21.2339982571154
G4V8B5	tr|G4V8B5|G4V8B5_SCHMA Sel-1-like protein, sel-1l OS=Schistosoma mansoni GN=Smp_133270 PE=4 SV=1	5	87.214	0.282665	0.548729	0.448803	1.36491	FALSE	16.9026678277545	17.2789724549092	16.8618481011569	15.8632484929612	16.5517669416263	17.2820641701085
G4V8C2	tr|G4V8C2|G4V8C2_SCHMA Reticulon-like protein OS=Schistosoma mansoni GN=Smp_020370 PE=4 SV=1	6	24.279	0.0112142	1.95023	0.866249	1.82292	FALSE	22.9628501374731	22.8684485276975	22.4313707283723	21.5890724880597	21.9043134276673	22.1705360757594
G4V8C4;G4V8C5	tr|G4V8C4|G4V8C4_SCHMA Putative alpha-glucosidase OS=Schistosoma mansoni GN=Smp_020340 PE=3 SV=1;tr|G4V8C5|G4V8C5_SCHMA Putative alpha-glucosidase OS=Schistosoma mansoni GN=Smp_133210 PE=3 SV=1	9	101.57	0.0199162	1.70079	-1.36958	2.58395	FALSE	17.7136327985076	17.9629782071895	16.3551836537368	18.689454853811	18.6412287315599	18.8098441459012
G4V8C8	tr|G4V8C8|G4V8C8_SCHMA Peptidase Clp (S14 family) OS=Schistosoma mansoni GN=Smp_210410 PE=4 SV=1	7	36.186	0.701123	0.154206	-0.0815436	1.05815	FALSE	21.1027843437758	21.0117779553277	20.5633301752587	20.8998329120694	21.0739390564008	20.9487514257315
G4V8D5;G4V8D6	tr|G4V8D5|G4V8D5_SCHMA Putative zeta-coat protein OS=Schistosoma mansoni GN=Smp_020220.1 PE=4 SV=1;tr|G4V8D6|G4V8D6_SCHMA Putative zeta-coat protein OS=Schistosoma mansoni GN=Smp_020220.2 PE=4 SV=1	3	19.502	0.913808	0.039145	0.0426956	1.03004	FALSE	21.5117456691445	21.3369535821209	20.1719799805677	21.0741930430622	20.8101763167769	21.0082230093181
G4V8F5	tr|G4V8F5|G4V8F5_SCHMA Rhomboid-like protein OS=Schistosoma mansoni GN=Smp_020090 PE=3 SV=1	2	44.756	0.0130161	1.88552	3.13727	8.7986	FALSE	18.900949884953	18.8364145364453	18.1901396924386	14.6259766897051	14.2728824249109	17.6168250800435
G4V8F8	tr|G4V8F8|G4V8F8_SCHMA Uncharacterized protein OS=Schistosoma mansoni GN=Smp_020070 PE=4 SV=1	37	96.475	8.4858e-06	5.07131	3.81411	14.0657	TRUE	24.0748869250427	24.2120686638848	23.5393903964209	20.4804986694392	19.8062907739379	20.0972308827627
G4V8F9	tr|G4V8F9|G4V8F9_SCHMA Uncharacterized protein OS=Schistosoma mansoni GN=Smp_020060 PE=4 SV=1	3	75.327	0.0367028	1.4353	1.73304	3.32428	FALSE	17.2835686481096	17.296459881638	17.8273566013756	16.7570129099229	14.2728824249109	16.1783681711748
G4V8G0	tr|G4V8G0|G4V8G0_SCHMA Putative cop9 signalosome complex subunit OS=Schistosoma mansoni GN=Smp_020050 PE=4 SV=1	8	51.839	0.877092	0.0569549	-0.0482275	1.03399	FALSE	19.5675086598882	19.1052242841382	19.2607468962897	19.7286566473952	18.7867201096774	19.5627856882112
G4V8G2;G4V8G1	tr|G4V8G2|G4V8G2_SCHMA Uncharacterized protein OS=Schistosoma mansoni GN=Smp_020040.2 PE=3 SV=1;tr|G4V8G1|G4V8G1_SCHMA Uncharacterized protein OS=Schistosoma mansoni GN=Smp_020040.1 PE=3 SV=1	7	42.117	0.859952	0.0655256	0.0556652	1.03934	FALSE	19.2840543378287	19.9546054983334	19.5635087892582	19.6356974519044	19.9444484379044	19.0550272139168
G4V8G8	tr|G4V8G8|G4V8G8_SCHMA Putative syntaxin OS=Schistosoma mansoni GN=Smp_019890 PE=3 SV=1	6	29.962	0.00221633	2.65437	1.25799	2.39162	TRUE	21.4275806856982	21.0648666551246	21.1575251116438	19.5543593537717	20.306614762068	20.0150284503483
G4V8H0	tr|G4V8H0|G4V8H0_SCHMA Serine/threonine kinase OS=Schistosoma mansoni GN=Smp_133020 PE=4 SV=1	5	27.231	0.0844922	1.07318	-1.10823	2.15581	FALSE	17.8890491163933	19.6573420506054	19.8853932249877	20.3093110616077	20.1766690893514	20.2704930536364
G4V8H1	tr|G4V8H1|G4V8H1_SCHMA Putative p38 MAPk OS=Schistosoma mansoni GN=Smp_191040 PE=4 SV=1	1	10.145	0.513211	0.289704	-0.16509	1.12124	FALSE	20.2695521987769	20.365617340373	20.3609270289184	20.0400173079916	20.6913850137602	20.7599634678321
G4V8H7	tr|G4V8H7|G4V8H7_SCHMA Putative importin 7 OS=Schistosoma mansoni GN=Smp_133710 PE=4 SV=1	6	61.683	0.167251	0.776632	-0.736441	1.66606	FALSE	19.2036487639307	19.5046889794966	17.7486928183169	19.4909222864475	19.4989254917563	19.6765047647803
G4V8H9	tr|G4V8H9|G4V8H9_SCHMA Putative hiv-1 rev binding protein, hrbl OS=Schistosoma mansoni GN=Smp_021290 PE=4 SV=1	4	55.465	0.122511	0.911826	1.80644	3.49778	FALSE	17.6846364129164	18.7433321907111	18.0933959694128	16.0089983073615	18.5609253617831	14.5321256808221
G4V8I1	tr|G4V8I1|G4V8I1_SCHMA Putative udp-glucose glycoprotein:glucosyltransferase OS=Schistosoma mansoni GN=Smp_133700 PE=4 SV=1	17	189.18	0.00725354	2.13945	-1.16174	2.23728	TRUE	17.0625172578867	16.7114812865049	16.5565264049578	18.4191700514686	17.4797879964243	17.9167960100819
G4V8J2	tr|G4V8J2|G4V8J2_SCHMA Uncharacterized protein OS=Schistosoma mansoni GN=Smp_148070 PE=4 SV=1	3	84.319	0.396461	0.4018	-0.374185	1.29611	FALSE	13.8796899271999	14.5011210631332	14.7948629997498	15.4116159641058	14.8039636572844	14.0826484751829
G4V8L1	tr|G4V8L1|G4V8L1_SCHMA Uncharacterized protein OS=Schistosoma mansoni GN=Smp_090870 PE=4 SV=1	4	96.66	0.702773	0.153185	-0.098666	1.07078	FALSE	18.2760078465697	18.7402590209883	18.099266724985	18.5379241012412	18.1779771170898	18.695630253856
G4V8L2	tr|G4V8L2|G4V8L2_SCHMA Uncharacterized protein OS=Schistosoma mansoni GN=Smp_090860 PE=4 SV=1	10	55.655	0.35117	0.454482	0.225809	1.16943	FALSE	20.8391336341472	20.1727421287842	20.6606942515945	20.2135420075132	20.3469245127713	20.4346775993298
G4V8L4	tr|G4V8L4|G4V8L4_SCHMA Putative heat shock protein 70 OS=Schistosoma mansoni GN=Smp_106930 PE=3 SV=1	1	69.858	0.204277	0.689781	-0.431061	1.34822	FALSE	21.9240899820606	22.7061411175159	22.8580912384965	22.6634749530776	23.1815680904007	22.9364631357192
G4V8M3	tr|G4V8M3|G4V8M3_SCHMA Uncharacterized protein OS=Schistosoma mansoni GN=Smp_019940.1 PE=4 SV=1	1	40.527	0.182027	0.739865	-1.26972	2.41114	FALSE	16.7340224185938	17.7527472450582	14.4707619788912	17.0191498882477	17.7451603320313	18.0023737379222
G4V8N4	tr|G4V8N4|G4V8N4_SCHMA Peptidyl-prolyl cis-trans isomerase OS=Schistosoma mansoni GN=Smp_210750 PE=4 SV=1	3	15.148	0.107996	0.966593	-0.828013	1.77524	FALSE	17.6719681473448	19.3081345480573	18.0735223738869	18.9572453514172	19.3673528775615	19.2130671400706
G4V8P0	tr|G4V8P0|G4V8P0_SCHMA Dcp1 related OS=Schistosoma mansoni GN=Smp_165960 PE=4 SV=1	3	55.878	0.787644	0.10367	0.270408	1.20615	FALSE	16.8066477691101	17.5275628718032	15.0404369158066	16.4258562422648	17.6054410070685	14.5321256808221
G4V8P7	tr|G4V8P7|G4V8P7_SCHMA Putative flightless-I OS=Schistosoma mansoni GN=Smp_165930 PE=4 SV=1	7	152.45	0.639324	0.194279	-0.32027	1.24856	FALSE	16.2117092283915	15.0003717916859	15.1361561310011	17.1095141551612	14.9928824650146	15.2066491873787
G4V8Q4;G4V8Q3	tr|G4V8Q4|G4V8Q4_SCHMA Putative developmentally regulated GTP-binding protein 1 (Drg 1) OS=Schistosoma mansoni GN=Smp_173180.1 PE=4 SV=1;tr|G4V8Q3|G4V8Q3_SCHMA Putative developmentally regulated GTP-binding protein 1 (Drg 1) OS=Schistosoma mansoni GN=Smp_1	4	36.959	0.477754	0.320796	0.232153	1.17459	FALSE	17.1393783904308	17.971873776544	18.0356838375931	17.2009432546796	17.4851006619513	17.7644327910071
G4V8Q5	tr|G4V8Q5|G4V8Q5_SCHMA Actin-related protein 10, arp10 OS=Schistosoma mansoni GN=Smp_093230 PE=3 SV=1	5	45.674	0.0965593	1.01521	-0.344625	1.26982	FALSE	18.9180677465999	19.1264443467928	18.7467715767102	19.2894514529242	19.3606662729888	19.175040814511
G4V8Q6	tr|G4V8Q6|G4V8Q6_SCHMA Uncharacterized protein OS=Schistosoma mansoni GN=Smp_093220 PE=4 SV=1	25	74.223	0.248898	0.603979	-0.194466	1.1443	FALSE	23.2543186769204	23.3680761990124	23.3993748844858	23.4567355551487	23.5403391804637	23.6080931947739
G4V8Q8	tr|G4V8Q8|G4V8Q8_SCHMA Uncharacterized protein Smp_200410 OS=Schistosoma mansoni GN=Smp_200410 PE=3 SV=1	2	36.738	0.0109639	1.96003	-2.71302	6.55694	FALSE	14.2283307302282	14.5011210631332	16.9965909348996	17.6390362422778	18.0376277115378	18.1884465721053
G4V8S1;G4V8S0	tr|G4V8S1|G4V8S1_SCHMA Non-specific serine/threonine protein kinase OS=Schistosoma mansoni GN=Smp_014170.1 PE=4 SV=1;tr|G4V8S0|G4V8S0_SCHMA Non-specific serine/threonine protein kinase OS=Schistosoma mansoni GN=Smp_014170.2 PE=4 SV=1	3	98.946	0.31067	0.5077	-0.297094	1.22867	FALSE	14.2283307302282	14.7943099971115	14.8286518140792	15.2510107830617	14.9240705734626	14.567492571843
G4V8T2;G4VB03	tr|G4V8T2|G4V8T2_SCHMA Uncharacterized protein OS=Schistosoma mansoni GN=Smp_014270 PE=4 SV=1;tr|G4VB03|G4VB03_SCHMA Uncharacterized protein OS=Schistosoma mansoni GN=Smp_007300 PE=4 SV=1	1	10.855	0.123053	0.909908	-0.597177	1.51275	FALSE	19.3336937072792	19.9410626547534	18.7456176024543	20.1000759738944	20.0213178604483	19.6905102629957
G4V8V4	tr|G4V8V4|G4V8V4_SCHMA Putative acyl-coenzyme A binding domain containing (Fragment) OS=Schistosoma mansoni GN=Smp_147930 PE=4 SV=1	1	27.661	0.983799	0.0070938	-0.00789849	1.00549	FALSE	17.1274679516539	18.2087053013025	17.6603046073162	17.125471603213	18.0686278491251	17.8260738707244
G4V8W2	tr|G4V8W2|G4V8W2_SCHMA Putative high-affinity copper uptake protein OS=Schistosoma mansoni GN=Smp_048230 PE=4 SV=1	2	22.516	0.0199903	1.69918	-1.24854	2.376	FALSE	19.7655181871629	18.4854993531476	19.8102482607639	20.8431092961754	20.4124423707269	20.551319286722
G4V8W3	tr|G4V8W3|G4V8W3_SCHMA Putative mannose-1-phosphate guanyltransferase OS=Schistosoma mansoni GN=Smp_048240 PE=4 SV=1	9	51.475	0.134047	0.872743	0.360122	1.28353	FALSE	19.5364160911795	19.3968286428461	19.3906039969332	19.2155897323536	18.7292209273882	19.2986727411698
G4V8X7	tr|G4V8X7|G4V8X7_SCHMA Putative heat shock protein-HSP20/alpha crystallin family OS=Schistosoma mansoni GN=Smp_049250 PE=3 SV=1	18	37.034	0.0674555	1.17098	0.379602	1.30098	FALSE	26.6383884941999	26.7533312079809	26.7233860933332	26.1131200010354	26.4479153449965	26.4152636407695
G4V8X8	tr|G4V8X8|G4V8X8_SCHMA Putative heat shock protein hsp16 OS=Schistosoma mansoni GN=Smp_148530 PE=3 SV=1	30	77.835	0.0180086	1.74452	0.524578	1.43851	FALSE	24.6214731115075	24.7344593234877	24.5431690655294	23.96057193911	24.2001803484992	24.1646156625078
G4V8X9	tr|G4V8X9|G4V8X9_SCHMA Putative heat shock protein OS=Schistosoma mansoni GN=Smp_049270 PE=3 SV=1	16	52.245	0.895584	0.0478936	-0.0243309	1.01701	FALSE	24.1727397263085	24.5124896578455	24.4553248704245	24.2843738622631	24.3917734893699	24.5373994687295
G4V8Y1	tr|G4V8Y1|G4V8Y1_SCHMA Elongation factor Ts, mitochondrial OS=Schistosoma mansoni GN=Smp_148540 PE=3 SV=1	10	34.911	0.0693754	1.15879	-0.435858	1.35272	FALSE	19.7687443062558	19.4409353693545	19.9262464369812	20.3099272907226	20.1018355087269	20.0317378951367
G4V8Y7;G4V8Y2	tr|G4V8Y7|G4V8Y7_SCHMA Putative major egg antigen OS=Schistosoma mansoni GN=Smp_049300.3 PE=3 SV=1;tr|G4V8Y2|G4V8Y2_SCHMA Putative heat shock protein OS=Schistosoma mansoni GN=Smp_049300.1 PE=3 SV=1	2	39.417	0.0593435	1.22663	-2.51362	5.71052	FALSE	14.2283307302282	18.0794222843576	18.0391701975147	18.7037597132601	19.6734379170835	19.5105957285424
G4V8Y8	tr|G4V8Y8|G4V8Y8_SCHMA Phosphatidate cytidylyltransferase, mitochondrial OS=Schistosoma mansoni GN=Smp_148560.1 PE=3 SV=1	3	42.954	0.786672	0.104206	0.24928	1.18861	FALSE	16.5186370575647	16.6207979649079	17.4108639054717	14.6259766897051	17.1147584544468	18.0617236707968
G4V8Z1	tr|G4V8Z1|G4V8Z1_SCHMA Putative supervillin OS=Schistosoma mansoni GN=Smp_196250 PE=4 SV=1	4	260.79	0.0595095	1.22541	2.20212	4.60156	FALSE	16.3914471423623	13.913495067839	17.7367748654669	13.4173818214295	14.2728824249109	13.7450875072893
G4V8Z5	tr|G4V8Z5|G4V8Z5_SCHMA Pyrroline-5-carboxylate reductase OS=Schistosoma mansoni GN=Smp_049390 PE=3 SV=1	3	33.706	0.884801	0.0531544	-0.0253234	1.01771	FALSE	18.5383367230689	18.4040416963003	18.2242316903826	18.5209919705637	18.3550633222753	18.3665248859215
G4V8Z9	tr|G4V8Z9|G4V8Z9_SCHMA Uncharacterized protein OS=Schistosoma mansoni GN=Smp_148620 PE=4 SV=1	2	185.98	0.679201	0.168002	0.557031	1.47124	FALSE	14.162888159275	14.5011210631332	18.9785462885371	15.0865661301773	15.571836375726	15.313058633187
G4V904	tr|G4V904|G4V904_SCHMA Putative atp-dependent transporter OS=Schistosoma mansoni GN=Smp_049500 PE=4 SV=1	2	81.9	0.393557	0.404993	-0.454947	1.37073	FALSE	14.6804681705618	14.8875181753796	14.4707619788912	14.6724575133711	14.4693367242675	16.261795614479
G4V906;Q26544	tr|G4V906|G4V906_SCHMA Putative wd repeat protein SL1-17 OS=Schistosoma mansoni GN=Smp_049520 PE=4 SV=1;sp|Q26544|WSL17_SCHMA WD repeat-containing protein SL1-17 OS=Schistosoma mansoni PE=2 SV=1	2	32.998	0.326677	0.485881	-1.06659	2.09447	FALSE	14.2283307302282	17.839768399896	17.861137875116	17.6027942572729	17.7484296430252	17.77777140291
G4V910	tr|G4V910|G4V910_SCHMA Putative heat shock protein 70 (Hsp70) OS=Schistosoma mansoni GN=Smp_049550 PE=3 SV=1	29	71.237	0.571388	0.243069	-0.0995032	1.0714	FALSE	24.6679022146796	24.7070999536284	24.513172739632	24.6311021809393	24.6602103557752	24.8953719443462
G4V913	tr|G4V913|G4V913_SCHMA Uncharacterized protein OS=Schistosoma mansoni GN=Smp_175570 PE=4 SV=1	4	24.801	0.551099	0.258771	0.100469	1.07212	FALSE	20.6645088629034	20.8248746187099	20.9324679467513	20.6786376537778	20.672442716471	20.7693634595984
G4V926	tr|G4V926|G4V926_SCHMA Proteasome catalytic subunit 1 (T01 family) OS=Schistosoma mansoni GN=Smp_034490 PE=4 SV=1	6	24.485	0.634138	0.197816	-0.134624	1.09781	FALSE	21.0301251932371	20.3094377356362	20.5693709156279	20.6762499198489	21.1205090161373	20.5160483712106
G4V935	tr|G4V935|G4V935_SCHMA Putative alpha-actinin OS=Schistosoma mansoni GN=Smp_034550 PE=4 SV=1	48	104.32	0.000146536	3.83406	-1.52329	2.87446	TRUE	21.8815877184485	21.9289409418262	21.5280709122652	23.3154785882429	23.3534118649946	23.2395816893126
G4V946;G4V945	tr|G4V946|G4V946_SCHMA Uncharacterized protein OS=Schistosoma mansoni GN=Smp_140900.1 PE=4 SV=1;tr|G4V945|G4V945_SCHMA Uncharacterized protein OS=Schistosoma mansoni GN=Smp_140900.2 PE=4 SV=1	6	20.967	0.37962	0.420651	0.216794	1.16215	FALSE	22.4016254423084	22.1146263629195	21.6997236315495	21.8445041067717	21.992276962995	21.7288138468549
G4V949	tr|G4V949|G4V949_SCHMA Tubulin gamma chain OS=Schistosoma mansoni GN=Smp_034670 PE=3 SV=1	7	55.091	0.0114801	1.94005	0.983153	1.97678	FALSE	19.1978425507278	19.2976128472281	19.9763120225637	18.7069864052922	18.5911592433542	18.2241629158729
G4V952;G4V953	tr|G4V952|G4V952_SCHMA Sco1-related OS=Schistosoma mansoni GN=Smp_034700.1 PE=4 SV=1;tr|G4V953|G4V953_SCHMA Sco1-related OS=Schistosoma mansoni GN=Smp_034700.3 PE=4 SV=1	6	26.812	0.692111	0.159824	-0.137258	1.09981	FALSE	18.640669226491	18.9155643301678	19.2890582802382	18.5860456012558	19.6572612229625	19.0137590505561
G4V958	tr|G4V958|G4V958_SCHMA Putative phosphoglucomutase OS=Schistosoma mansoni GN=Smp_085150 PE=3 SV=1	15	63.799	0.0497484	1.30322	0.4446	1.36094	FALSE	21.4106292845778	21.8491709823644	21.7047707035275	21.2419848742586	21.2600463329676	21.1287408820133
G4V959	tr|G4V959|G4V959_SCHMA Putative vav2 OS=Schistosoma mansoni GN=Smp_168370.1 PE=4 SV=1	3	116.39	0.307005	0.512854	-0.446155	1.3624	FALSE	15.7531258957615	15.7685822222115	14.9261569226325	15.2579764889193	16.0314311448527	16.4969210923862
G4V966	tr|G4V966|G4V966_SCHMA Putative starch branching enzyme II OS=Schistosoma mansoni GN=Smp_094880 PE=4 SV=1	30	79.685	0.00631798	2.19942	-0.685987	1.6088	FALSE	22.1748925604934	22.4919203934934	22.2685405987544	22.9323908255763	23.0827584278952	22.978165775462
G4V969;A9NI52	tr|G4V969|G4V969_SCHMA Putative 26s protease regulatory subunit OS=Schistosoma mansoni GN=Smp_012470 PE=3 SV=1;tr|A9NI52|A9NI52_SCHMA 26S proteasome subunit ATPase 2 (Fragment) OS=Schistosoma mansoni GN=RPT1 PE=2 SV=1	20	48.509	0.939397	0.027151	-0.0168747	1.01177	FALSE	21.3669217567458	21.5276085780568	20.9933241543086	21.1208277477663	21.4984782137987	21.3191726449754
G4V979	tr|G4V979|G4V979_SCHMA Putative guanine-nucleotide-exchange-factor OS=Schistosoma mansoni GN=Smp_012580 PE=4 SV=1	3	101.89	0.129292	0.888428	0.562482	1.47681	FALSE	16.355736939327	16.5373293157023	15.5152457097204	15.2703450740434	15.7092398948944	15.7412818579132
G4V986;G4V985;G4V984;G4V983	tr|G4V986|G4V986_SCHMA Putative DNAj (Hsp40) homolog, subfamily C, member OS=Schistosoma mansoni GN=Smp_049600.1 PE=4 SV=1;tr|G4V985|G4V985_SCHMA Putative DNAj (Hsp40) homolog, subfamily C, member OS=Schistosoma mansoni GN=Smp_049600.4 PE=4 SV=1;tr|G4V984|	9	55.418	0.188372	0.724983	0.367719	1.29031	FALSE	19.9378538085814	20.3018414299397	20.2704566296786	19.3669056993545	20.0190637525778	20.0210262673024
G4V9A5;G4V9A6	tr|G4V9A5|G4V9A5_SCHMA Transketolase OS=Schistosoma mansoni GN=Smp_059790.2 PE=4 SV=1;tr|G4V9A6|G4V9A6_SCHMA Transketolase OS=Schistosoma mansoni GN=Smp_059790.1 PE=4 SV=1	29	67.153	0.0254565	1.5942	0.465675	1.38096	FALSE	26.1634991793388	26.4104569003625	26.2681220788879	25.8037946080285	25.7629544749499	25.878303829497
G4V9A7	tr|G4V9A7|G4V9A7_SCHMA Putative rab6-interacting protein 2 (ERC protein 1) OS=Schistosoma mansoni GN=Smp_059780 PE=4 SV=1	4	57.357	0.0916817	1.03772	-1.24717	2.37376	FALSE	15.9518922630167	14.5011210631332	17.003980064306	17.3188943891949	17.0545064045741	16.8251092817634
G4V9B1	tr|G4V9B1|G4V9B1_SCHMA Putative elongin B OS=Schistosoma mansoni GN=Smp_072380 PE=4 SV=1	6	13.655	0.0473394	1.32478	-0.510212	1.42426	FALSE	21.8445141197859	21.7043478984812	21.787805051908	22.3376740740808	22.5637027093814	21.9659250180462
G4V9B5;A9NI60	tr|G4V9B5|G4V9B5_SCHMA Putative 26s protease regulatory subunit 6b OS=Schistosoma mansoni GN=Smp_072340 PE=3 SV=1;tr|A9NI60|A9NI60_SCHMA 26S proteasome subunit RPT3 (Fragment) OS=Schistosoma mansoni GN=RPT3 PE=2 SV=1	13	46.795	0.203914	0.690553	0.222464	1.16672	FALSE	21.3203836448547	21.367022915565	21.3716771175995	21.0292471675105	21.2720110868162	21.0904335342152
G4V9B9;G4V9B8;Q26582	tr|G4V9B9|G4V9B9_SCHMA Putative heat shock protein OS=Schistosoma mansoni GN=Smp_072330.2 PE=3 SV=1;tr|G4V9B8|G4V9B8_SCHMA Putative heat shock protein OS=Schistosoma mansoni GN=Smp_072330.1 PE=3 SV=1;tr|Q26582|Q26582_SCHMA Heat shock protein 86 (Fragment)	46	82.174	0.178039	0.749484	-0.278639	1.21305	FALSE	26.5326164098397	26.409546505438	26.0715413290243	26.604994891823	26.6140652504347	26.6305603312969
G4V9C3	tr|G4V9C3|G4V9C3_SCHMA Putative rab15, 13, 10, 1, 35, 5, and OS=Schistosoma mansoni GN=Smp_210430 PE=4 SV=1	6	24.441	0.232047	0.634424	0.258181	1.19597	FALSE	23.0538329261619	22.8814939109068	22.5202449139149	22.6012064326824	22.5042251588953	22.5755962524527
G4V9C8	tr|G4V9C8|G4V9C8_SCHMA Putative succinate semialdehyde dehydrogenase OS=Schistosoma mansoni GN=Smp_161350 PE=3 SV=1	7	59.616	0.528201	0.277201	-0.329069	1.2562	FALSE	19.0396345428916	19.3517697457985	20.8842655672645	19.9437735308091	20.1985115281386	20.1205914979166
G4V9D5	tr|G4V9D5|G4V9D5_SCHMA Putative cyclin fold protein OS=Schistosoma mansoni GN=Smp_172050 PE=3 SV=1	1	46.14	0.198981	0.701188	0.610678	1.52698	FALSE	15.9559156113766	15.9765957476795	16.4483331808353	14.6259766897051	15.7665641833669	16.1562709156177
G4V9E1	tr|G4V9E1|G4V9E1_SCHMA Putative immunoglobulin domain superfamily (Sensory guidance protein) OS=Schistosoma mansoni GN=Smp_172070 PE=4 SV=1	4	91.73	0.645743	0.18994	-0.189508	1.14037	FALSE	17.2625043111703	16.3976340993	16.897424778324	17.4339696437269	17.3867557270632	16.3053612979995
G4V9E4	tr|G4V9E4|G4V9E4_SCHMA Glutamine synthetase OS=Schistosoma mansoni GN=Smp_091460 PE=3 SV=1	14	40.904	0.271343	0.566481	0.200034	1.14873	FALSE	24.3381301598616	24.1987652579815	24.3669802539043	23.9883735120881	24.268122249518	24.0472767813844
G4V9G0	tr|G4V9G0|G4V9G0_SCHMA Aminomethyltransferase OS=Schistosoma mansoni GN=Smp_128980 PE=3 SV=1	2	40.946	0.247435	0.606539	0.457497	1.37316	FALSE	16.3509763799009	17.1797392892512	17.4715142301628	16.1366303520096	16.8786910962132	16.61441750488
G4V9G1	tr|G4V9G1|G4V9G1_SCHMA Coronin OS=Schistosoma mansoni GN=Smp_012720 PE=3 SV=1	18	60.23	0.0101323	1.99429	-0.593347	1.50874	FALSE	21.8172889176676	22.0957913567646	21.9266939254328	22.4748158512305	22.5690828143489	22.5759169498669
G4V9G5	tr|G4V9G5|G4V9G5_SCHMA Putative 60s ribosomal protein L12 OS=Schistosoma mansoni GN=Smp_012750 PE=3 SV=1	4	17.73	0.873315	0.0588289	-0.0439568	1.03094	FALSE	23.0795241571378	22.9527727916313	22.2143690298646	22.8481620276998	22.7691661921759	22.7612081791761
G4V9G7	tr|G4V9G7|G4V9G7_SCHMA Putative sarm1 OS=Schistosoma mansoni GN=Smp_012780 PE=4 SV=1	5	136.48	0.471587	0.326439	0.629107	1.54661	FALSE	15.5623696993095	18.2721686891116	15.3387476046038	15.2194286888084	15.861056119096	16.2054792132322
G4V9G9	tr|G4V9G9|G4V9G9_SCHMA Uncharacterized protein OS=Schistosoma mansoni GN=Smp_012800 PE=4 SV=1	2	10.231	0.188203	0.725372	-0.420811	1.33868	FALSE	19.6312292144581	20.3913385761169	19.9129593314278	20.6563046326501	20.5365665794439	20.0050884180994
G4V9H0	tr|G4V9H0|G4V9H0_SCHMA Putative four and A half lim domains OS=Schistosoma mansoni GN=Smp_012810 PE=4 SV=1	10	13.63	0.12262	0.911438	-0.337576	1.26363	FALSE	24.1389373546809	24.1786227492833	23.7546846062079	24.2767325668112	24.4793757361888	24.3288645068871
G4V9H8	tr|G4V9H8|G4V9H8_SCHMA Putative dynamin OS=Schistosoma mansoni GN=Smp_129050 PE=3 SV=1	13	104.28	0.0455407	1.3416	-0.812614	1.75639	FALSE	18.934484072859	18.9387100374119	18.0019898975852	19.7430261372022	19.1671921674455	19.4028082278225
G4V9I0	tr|G4V9I0|G4V9I0_SCHMA Putative solute carrier family 17, member 7 (Vesicular glutamate transporter) OS=Schistosoma mansoni GN=Smp_129060 PE=4 SV=1	2	65.563	0.0196612	1.70639	1.92884	3.80748	FALSE	16.2824393658482	17.6368528829076	17.8526527427771	15.7147342413677	14.2728824249109	15.9978213685438
G4V9I2	tr|G4V9I2|G4V9I2_SCHMA Putative fuse-binding protein-interacting repressor siahbp1 OS=Schistosoma mansoni GN=Smp_012900 PE=4 SV=1	4	56.244	0.621892	0.206285	-0.0987976	1.07088	FALSE	18.1427998233828	18.4157945747274	18.0052079148273	18.1593306478221	18.2329231370779	18.4679412862018
G4V9I3	tr|G4V9I3|G4V9I3_SCHMA Uncharacterized protein OS=Schistosoma mansoni GN=Smp_129080 PE=4 SV=1	3	12.764	0.0589159	1.22977	-0.753296	1.68564	FALSE	22.1465247991313	21.6740592049117	21.0130763852166	22.6116572561937	22.3267496089412	22.1551401502159
G4V9I5	tr|G4V9I5|G4V9I5_SCHMA Inosine-5-monophosphate dehydrogenase OS=Schistosoma mansoni GN=Smp_012930 PE=3 SV=1	15	55.062	0.00156773	2.80473	-0.840612	1.79081	FALSE	20.4009592120079	20.3925938577073	20.3609270289184	21.3462272466333	21.2096007068004	21.1204880455455
G4V9J6	tr|G4V9J6|G4V9J6_SCHMA Uncharacterized protein OS=Schistosoma mansoni GN=Smp_161030 PE=4 SV=1	9	30.57	0.00240399	2.61907	-5.15146	35.5422	TRUE	14.6089568350505	18.2325660625951	14.4707619788912	21.0125611742603	21.1233510354659	20.6307510132402
G4V9J7	tr|G4V9J7|G4V9J7_SCHMA Uncharacterized protein OS=Schistosoma mansoni GN=Smp_071520 PE=4 SV=1	7	9.5759	0.0114556	1.94098	-4.96932	31.3267	FALSE	14.2283307302282	19.7687098435164	18.4599190916842	22.7176300181636	22.5002855065633	22.1470119840195
G4V9L3	tr|G4V9L3|G4V9L3_SCHMA Putative shc transforming protein OS=Schistosoma mansoni GN=Smp_172110 PE=3 SV=1	11	40.227	0.270552	0.56775	0.243047	1.18349	FALSE	23.2670682945695	23.6162673329478	23.4818833687917	22.9715405793315	23.2180932254116	23.4464452960178
G4V9M0	tr|G4V9M0|G4V9M0_SCHMA Phosphate transporter OS=Schistosoma mansoni GN=Smp_094660 PE=3 SV=1	2	54.113	0.293181	0.532865	-0.539563	1.45353	FALSE	16.0858812509523	17.1136828182014	17.8432022434	17.7893469018308	17.1706846245235	17.7014239393071
G4V9M3	tr|G4V9M3|G4V9M3_SCHMA Putative heat shock protein 70 (Hsp70) OS=Schistosoma mansoni GN=Smp_094680 PE=3 SV=1	1	22.197	0.154043	0.812359	-1.46032	2.75169	FALSE	17.3475461052442	17.833200788818	14.4707619788912	18.5263753434646	17.7556471252446	17.7504349760052
G4V9N7	tr|G4V9N7|G4V9N7_SCHMA Egf-like domain protein OS=Schistosoma mansoni GN=Smp_154760 PE=4 SV=1	30	198.16	0.00101274	2.9945	0.929792	1.905	FALSE	21.4480551080018	21.4124074717878	21.429112584714	20.4392865843925	20.4130484178019	20.6478638349253
G4V9N9	tr|G4V9N9|G4V9N9_SCHMA Putative nucleotide binding protein 2 (Nbp 2) OS=Schistosoma mansoni GN=Smp_210380 PE=4 SV=1	1	17.136	0.181061	0.742176	1.04147	2.05833	FALSE	17.3613763513766	17.3019215997066	16.903207130918	16.8390733059192	17.0708827011683	14.5321256808221
G4V9Q0	tr|G4V9Q0|G4V9Q0_SCHMA Putative dynamin OS=Schistosoma mansoni GN=Smp_067280 PE=3 SV=1	11	77.096	0.288292	0.540167	-0.333555	1.26011	FALSE	18.6651304654296	18.4653115290833	18.6524895403924	19.2747961748395	19.1696808110258	18.3391186329807
G4V9R2	tr|G4V9R2|G4V9R2_SCHMA Putative membrane associated progesterone receptor OS=Schistosoma mansoni GN=Smp_093700 PE=3 SV=1	2	21.428	0.996922	0.00133878	-0.000768845	1.00053	FALSE	19.0884363924059	18.7050856612387	18.7313441671548	18.8085252392921	18.701772635504	19.0168748795711
G4V9S0;P25824	tr|G4V9S0|G4V9S0_SCHMA Adenylate kinase OS=Schistosoma mansoni GN=Smp_071390 PE=1 SV=1;sp|P25824|KAD_SCHMA Adenylate kinase OS=Schistosoma mansoni PE=2 SV=1	14	22.303	0.461355	0.335965	-0.163331	1.11987	FALSE	24.9198175285499	24.4612165120411	24.560921689514	24.7928765999615	25.0255018170863	24.6135705957052
G4V9S3	tr|G4V9S3|G4V9S3_SCHMA Putative membrane traffic protein OS=Schistosoma mansoni GN=Smp_140490 PE=4 SV=1	5	56.112	0.121048	0.917043	0.399607	1.31915	FALSE	20.9793316941702	20.9881408644818	21.075778130088	20.5426972805276	20.997876263395	20.3038569785454
G4V9T2	tr|G4V9T2|G4V9T2_SCHMA Putative flotillin-2 OS=Schistosoma mansoni GN=Smp_033970 PE=4 SV=1	8	50.123	0.0429882	1.36665	0.454998	1.37078	FALSE	19.9480182130723	19.893141394231	19.9852728439847	19.4105897544187	19.3188479453051	19.731999877372
G4V9U8	tr|G4V9U8|G4V9U8_SCHMA Uncharacterized protein OS=Schistosoma mansoni GN=Smp_140590 PE=4 SV=1	28	121.51	0.00504617	2.29704	0.649475	1.5686	FALSE	21.738813619046	21.9201762713123	21.8285461260061	21.1684959373535	21.2151714129386	21.1554431207202
G4V9U9	tr|G4V9U9|G4V9U9_SCHMA Putative major vault protein OS=Schistosoma mansoni GN=Smp_006740 PE=4 SV=1	36	97.253	0.0184767	1.73338	0.697971	1.62222	FALSE	23.4873742737714	23.4767758971189	23.0843096816718	22.7958430013408	22.3524379869117	22.8062662082064
G4V9V3;G4V9V4	tr|G4V9V3|G4V9V3_SCHMA Putative synaptobrevin OS=Schistosoma mansoni GN=Smp_006720.1 PE=4 SV=1;tr|G4V9V4|G4V9V4_SCHMA Putative synaptobrevin OS=Schistosoma mansoni GN=Smp_006720.2 PE=4 SV=1	2	9.2153	0.864711	0.063129	-0.0536109	1.03786	FALSE	19.460897413212	19.7746529828825	18.76476555049	19.5251729108755	19.5018341712625	19.1341415102661
G4V9W3	tr|G4V9W3|G4V9W3_SCHMA Uncharacterized protein OS=Schistosoma mansoni GN=Smp_125800 PE=4 SV=1	4	49.342	0.000722105	3.1414	-1.52627	2.8804	TRUE	16.8374801152947	16.8893404792972	17.3282460223543	18.4612237526451	18.2884536534514	18.8841898468345
G4V9W9;G4V9X0	tr|G4V9W9|G4V9W9_SCHMA Putative scythe/bat3 OS=Schistosoma mansoni GN=Smp_125770.1 PE=4 SV=1;tr|G4V9X0|G4V9X0_SCHMA Putative scythe/bat3 OS=Schistosoma mansoni GN=Smp_125770.2 PE=4 SV=1	1	131.46	0.00159343	2.79767	-1.13921	2.2026	TRUE	14.2283307302282	14.5011210631332	14.4707619788912	15.6381641016148	15.2187670058384	15.7609115374683
G4V9X4	tr|G4V9X4|G4V9X4_SCHMA Uncharacterized protein OS=Schistosoma mansoni GN=Smp_006560 PE=4 SV=1	7	20.255	0.0106238	1.97372	-0.890814	1.85422	FALSE	21.3683402287653	21.1807132827056	20.6327835445523	21.9056653835853	22.1342653396754	21.8143472969364
G4V9X6	tr|G4V9X6|G4V9X6_SCHMA Putative glutaredoxin, grx OS=Schistosoma mansoni GN=Smp_006550.1 PE=4 SV=1	7	23.978	0.0944805	1.02466	0.362922	1.28603	FALSE	21.4525372109358	21.1127234224994	21.0218413106245	20.7577558788594	20.9119443831088	20.8286345159701
G4V9X7	tr|G4V9X7|G4V9X7_SCHMA Uncharacterized protein OS=Schistosoma mansoni GN=Smp_125730 PE=4 SV=1	9	76.309	0.841456	0.0749686	-0.0657397	1.04662	FALSE	20.6819010463081	19.8399340481477	20.3515335549395	20.5446184291015	19.8815549208893	20.64441430093
G4V9Y0	tr|G4V9Y0|G4V9Y0_SCHMA Putative pyruvate dehydrogenase OS=Schistosoma mansoni GN=Smp_068170.1 PE=4 SV=1	5	44.006	0.00331315	2.47976	-1.25151	2.38091	TRUE	18.0219399812919	18.5048979328256	18.9405740724817	19.793152089929	19.6096945870774	19.8191041930261
G4V9Y1	tr|G4V9Y1|G4V9Y1_SCHMA Putative pyruvate dehydrogenase OS=Schistosoma mansoni GN=Smp_070390 PE=4 SV=1	1	13.597	0.0164968	1.7826	-0.714263	1.64064	FALSE	18.7186375193763	18.192768191713	18.3476437389742	18.9344614483205	19.1112522692287	19.3561239469339
G4V9Y3	tr|G4V9Y3|G4V9Y3_SCHMA Putative transmembrane transport protein OS=Schistosoma mansoni GN=Smp_072950 PE=3 SV=1	7	24.537	0.115953	0.935717	-0.37673	1.2984	FALSE	22.7090886837971	22.7424069886774	22.189734759687	22.9353891537235	22.911872918339	22.9241581853888
G4V9Y4	tr|G4V9Y4|G4V9Y4_SCHMA Putative phosphorylase B kinase beta, kpbb OS=Schistosoma mansoni GN=Smp_161680 PE=4 SV=1	8	136.73	0.037695	1.42372	-1.00109	2.00152	FALSE	16.4638033995792	16.8718773436643	17.4408165232018	18.3188127495468	17.2974096127201	18.163559201696
G4VA01;G4VA02	tr|G4VA01|G4VA01_SCHMA Ferritin OS=Schistosoma mansoni GN=Smp_063530.1 PE=3 SV=1;tr|G4VA02|G4VA02_SCHMA Ferritin OS=Schistosoma mansoni GN=Smp_063530.2 PE=3 SV=1	3	22.286	0.696843	0.156865	-0.253706	1.19227	FALSE	17.9252024574075	20.0235095629577	18.9556230250691	19.3998242799795	19.8471518865115	18.4184775265539
G4VA12	tr|G4VA12|G4VA12_SCHMA Putative g-protein, beta subunit OS=Schistosoma mansoni GN=Smp_063640 PE=4 SV=1	6	37.512	0.271234	0.566656	0.263166	1.20011	FALSE	21.8516700301185	21.5491569747025	22.0559549018616	21.7941311839883	21.3293739087647	21.5437783812922
G4VA17	tr|G4VA17|G4VA17_SCHMA Uncharacterized protein OS=Schistosoma mansoni GN=Smp_063670 PE=4 SV=1	7	36.581	0.000345925	3.46102	2.46297	5.5135	TRUE	18.3873973909732	18.7753267931048	18.9968554850856	15.7046055962347	16.8442338584242	16.2218348564288
G4VA23;B8YCP4	tr|G4VA23|G4VA23_SCHMA Putative 22.6kDa tegument-associated antigen OS=Schistosoma mansoni GN=Smp_086470 PE=4 SV=1;tr|B8YCP4|B8YCP4_SCHMA Tegument-associated antigen OS=Schistosoma mansoni PE=2 SV=1	11	21.624	0.000190985	3.719	2.92967	7.61935	TRUE	25.2618454722626	24.9595540666898	24.4386515700621	21.7994799777966	22.5840726326108	21.4874941618092
G4VA28	tr|G4VA28|G4VA28_SCHMA Tegumental antigen OS=Schistosoma mansoni GN=SmTAL11 PE=2 SV=1	6	21.145	2.06812e-05	4.68442	1.93599	3.82639	TRUE	22.8537358957107	23.0456255482284	22.9837906483019	21.0713286708764	21.1160493679466	20.8878169431101
G4VA33	tr|G4VA33|G4VA33_SCHMA Putative eukaryotic translation initiation factor 3 subunit (Eif-3) OS=Schistosoma mansoni GN=Smp_161480 PE=4 SV=1	4	118.97	0.376349	0.424409	0.607453	1.52357	FALSE	15.5691568597894	15.3972739507545	14.4707619788912	15.0193776465927	13.2029069671651	15.3925500033414
G4VA73	tr|G4VA73|G4VA73_SCHMA Putative vacuolar protein sorting 26, vps26 OS=Schistosoma mansoni GN=Smp_210780 PE=4 SV=1	28	92.712	0.811273	0.0908332	-0.0452878	1.03189	FALSE	22.0193656043259	22.0865523247801	21.653394159589	21.9985921718454	21.9380761305552	21.9585072496915
G4VA76	tr|G4VA76|G4VA76_SCHMA Uncharacterized protein OS=Schistosoma mansoni GN=Smp_161790.2 PE=4 SV=1	1	27.665	0.92919	0.0318955	-0.0178879	1.01248	FALSE	21.2269434815866	21.196323419914	20.9218258247491	20.8841020803118	21.2501877799071	21.2644665351415
G4VA77	tr|G4VA77|G4VA77_SCHMA Uncharacterized protein OS=Schistosoma mansoni GN=Smp_161790.1 PE=4 SV=1	17	47.681	0.129941	0.886255	-0.285967	1.21923	FALSE	24.0368823178139	23.966156076348	23.9173489227686	24.0917287843207	24.2989160099021	24.3876440249356
G4VA87	tr|G4VA87|G4VA87_SCHMA Putative neuroendocrine protein 7b2 OS=Schistosoma mansoni GN=Smp_073270 PE=4 SV=1	1	33.137	0.583526	0.23394	-0.420294	1.3382	FALSE	16.7284592330804	14.5011210631332	17.3576577097977	16.4903908091746	16.7484936731626	16.6092364201572
G4VA88	tr|G4VA88|G4VA88_SCHMA Uncharacterized protein OS=Schistosoma mansoni GN=Smp_073280 PE=4 SV=1	2	30.379	0.203885	0.690615	1.24269	2.36639	FALSE	18.2742394955466	19.8989300615066	20.1333299299428	16.4455314865376	19.0761218542035	19.056779935244
G4VA94	tr|G4VA94|G4VA94_SCHMA Putative intermembrane space import and assembly protein 40, mitochondrial (Mitochondrial import inner membrane translocase TIM40) OS=Schistosoma mansoni GN=Smp_062830.1 PE=4 SV=1	3	15.055	0.00585439	2.23252	-1.67008	3.18233	TRUE	18.5263052717145	18.9852482585427	19.6372781605882	20.8012098135662	21.2333578526219	20.1245172011304
G4VA96	tr|G4VA96|G4VA96_SCHMA GrpE protein homolog OS=Schistosoma mansoni GN=Smp_062790 PE=3 SV=1	5	25.042	0.0169849	1.76994	-1.48361	2.79647	FALSE	20.293986595391	20.5028302852501	18.8529775204829	21.2220065821337	21.5117422905325	21.3668737843612
G4VAA5;G4VAA6	tr|G4VAA5|G4VAA5_SCHMA Putative cysteinyl-tRNA synthetase OS=Schistosoma mansoni GN=Smp_170800.1 PE=3 SV=1;tr|G4VAA6|G4VAA6_SCHMA Putative cysteinyl-tRNA synthetase OS=Schistosoma mansoni GN=Smp_170800.2 PE=3 SV=1	17	92.476	0.709229	0.149213	-0.0809424	1.05771	FALSE	18.7600587380584	18.9773723187962	18.7244381720358	19.1875779355165	18.8984463913599	18.6186720770662
G4VAA7	tr|G4VAA7|G4VAA7_SCHMA Ubiquitin-specific peptidase 7 (C19 family) OS=Schistosoma mansoni GN=Smp_089180 PE=3 SV=1	26	156.44	0.0591712	1.22789	-0.51387	1.42787	FALSE	20.3803412617032	20.6432791520671	19.958553705734	20.8301847300859	20.7611953171534	20.9324026016271
G4VAB2	tr|G4VAB2|G4VAB2_SCHMA Uncharacterized protein OS=Schistosoma mansoni GN=Smp_089220 PE=4 SV=1	7	26.702	0.00268744	2.57066	0.9677	1.95572	FALSE	22.1132669800262	22.0275794555108	22.1886415165351	20.8538546244759	21.3982285115072	21.1743034593938
G4VAD1	tr|G4VAD1|G4VAD1_SCHMA Receptor expression-enhancing protein OS=Schistosoma mansoni GN=Smp_099890 PE=3 SV=1	7	21.422	0.170545	0.768161	-0.287672	1.22067	FALSE	23.8724467003403	23.9579120822531	23.5687284328558	24.1879858419054	24.1429529427558	23.9311645150446
G4VAD2;Q94747	tr|G4VAD2|G4VAD2_SCHMA Elongation factor 1-alpha OS=Schistosoma mansoni GN=Smp_099870 PE=3 SV=1;tr|Q94747|Q94747_SCHMA Elongation factor 1-alpha OS=Schistosoma mansoni GN=EF1-alpha PE=2 SV=1	25	50.98	0.48536	0.313936	0.114681	1.08274	FALSE	26.4125178650823	26.5703813178833	26.3691283767895	26.3721030970249	26.2721293995504	26.3637525075716
G4VAF7;G4VAF6;G4VAF8	tr|G4VAF7|G4VAF7_SCHMA Putative tumor protein d52 OS=Schistosoma mansoni GN=Smp_065470.2 PE=4 SV=1;tr|G4VAF6|G4VAF6_SCHMA Putative tumor protein d52 OS=Schistosoma mansoni GN=Smp_065470.3 PE=4 SV=1;tr|G4VAF8|G4VAF8_SCHMA Putative tumor protein d52 OS=Schis	5	18.337	0.218304	0.660938	-0.445513	1.3618	FALSE	21.6362558734595	21.6965429529961	20.6806840247641	21.7530808581723	22.0284546954685	21.5684848938566
G4VAG2	tr|G4VAG2|G4VAG2_SCHMA Calpain (C02 family) OS=Schistosoma mansoni GN=Smp_157500 PE=3 SV=1	49	172.93	2.17387e-05	4.66277	2.36006	5.13393	TRUE	25.0078602421526	24.809919434157	24.6709310088575	22.7303455964981	22.2737639057919	22.4044066313174
G4VAG6;G4VAG8;G4VAG7;G4VAG9;G4VAH0	tr|G4VAG6|G4VAG6_SCHMA Putative heterogeneous nuclear ribonucleoprotein k OS=Schistosoma mansoni GN=Smp_065580.5 PE=4 SV=1;tr|G4VAG8|G4VAG8_SCHMA Putative heterogeneous nuclear ribonucleoprotein k OS=Schistosoma mansoni GN=Smp_065580.1 PE=4 SV=1;tr|G4VAG7|	4	33.92	0.0037927	2.42105	1.18371	2.2716	TRUE	19.333760731958	19.2441831966572	19.1890596190969	18.4372072854158	18.2082279412581	17.5704402276077
G4VAI0;G4VAH9	tr|G4VAI0|G4VAI0_SCHMA Pyruvate kinase OS=Schistosoma mansoni GN=Smp_065610.1 PE=3 SV=1;tr|G4VAH9|G4VAH9_SCHMA Pyruvate kinase OS=Schistosoma mansoni GN=Smp_065610.2 PE=3 SV=1	34	54.784	0.0494785	1.30558	-0.386512	1.30723	FALSE	25.4933558257885	25.6203581850785	25.3685783359356	25.931223124144	25.8259873409493	25.8846186053338
G4VAI3	tr|G4VAI3|G4VAI3_SCHMA Putative co-chaperone protein HscB, mitochondrial (Hsc20) OS=Schistosoma mansoni GN=Smp_065650 PE=4 SV=1	2	32.993	0.23072	0.636915	0.434691	1.35162	FALSE	16.9362508547766	17.4071255482773	17.0988286153428	17.3707435653637	16.3391477565138	16.4282394429781
G4VAI6	tr|G4VAI6|G4VAI6_SCHMA Uncharacterized protein OS=Schistosoma mansoni GN=Smp_157590 PE=4 SV=1	13	119.8	0.000969818	3.01331	-1.16541	2.24296	TRUE	17.6879959138748	17.7042366960352	17.914329353152	19.1799574182658	18.687816749875	18.935005012673
G4VAJ6	tr|G4VAJ6|G4VAJ6_SCHMA Putative rho GTPase OS=Schistosoma mansoni GN=Smp_104110 PE=3 SV=1	4	21.658	0.0494047	1.30623	0.909535	1.87844	FALSE	19.528219878455	20.6716828670707	19.5338557054493	18.954462944496	19.3199901790639	18.7306991999494
G4VAJ8	tr|G4VAJ8|G4VAJ8_SCHMA Protein kinase OS=Schistosoma mansoni GN=Smp_154440 PE=3 SV=1	2	364.57	0.579942	0.236615	0.315344	1.24431	FALSE	12.9097542285843	12.4378714662329	14.4707619788912	13.2829656678703	12.791279737079	12.7981088116182
G4VAJ9	tr|G4VAJ9|G4VAJ9_SCHMA 40S ribosomal protein S12 OS=Schistosoma mansoni GN=Smp_060090.1 PE=3 SV=1	5	14.591	0.00561552	2.25061	-0.6978	1.62203	FALSE	21.9503733245592	22.1345321724619	21.9364194347546	22.8584955541834	22.6498886883236	22.6063397190566
G4VAK1	tr|G4VAK1|G4VAK1_SCHMA Putative septin OS=Schistosoma mansoni GN=Smp_060070 PE=2 SV=1	6	56.892	0.289879	0.537783	0.352303	1.2766	FALSE	19.3249763547716	19.4879678500677	19.0779747963419	19.3679581852964	18.3538854059229	19.1121669168037
G4VAK2	tr|G4VAK2|G4VAK2_SCHMA Putative clathrin heavy chain OS=Schistosoma mansoni GN=Smp_191010 PE=4 SV=1	11	35.318	0.146424	0.834389	0.315682	1.2446	FALSE	21.9954152591763	22.235150302014	22.1026234290697	21.8351401575174	21.546221384486	22.0047801888449
G4VAK4;G4VAK3	tr|G4VAK4|G4VAK4_SCHMA Clathrin heavy chain OS=Schistosoma mansoni GN=Smp_154420.1 PE=3 SV=1;tr|G4VAK3|G4VAK3_SCHMA Putative clathrin heavy chain OS=Schistosoma mansoni GN=Smp_154420.2 PE=4 SV=1	48	153.11	0.293442	0.532477	0.260235	1.19767	FALSE	21.9841435929998	22.1272740237442	22.2117440209001	21.9924632677304	21.4468336923054	22.1031589483977
G4VAK6	tr|G4VAK6|G4VAK6_SCHMA Putative ubx domain containing protein OS=Schistosoma mansoni GN=Smp_060010 PE=4 SV=1	6	43.208	0.006497	2.18729	0.804047	1.74599	FALSE	20.7577958953474	20.5463399803274	20.4762022171195	19.6316500051497	20.0710619131733	19.6654853013764
G4VAL2	tr|G4VAL2|G4VAL2_SCHMA Putative leucyl-tRNA synthetase OS=Schistosoma mansoni GN=Smp_194160 PE=3 SV=1	20	134.65	0.00406304	2.39115	-1.12598	2.1825	TRUE	17.3571620493315	18.1497641012565	18.0300651000532	18.9831306654467	18.9042056606485	19.0275951929623
G4VAL3	tr|G4VAL3|G4VAL3_SCHMA Putative sodium/potassium-transporting ATPase subunit beta (Sodium/potassium-dependent ATPase beta subunit) OS=Schistosoma mansoni GN=Smp_033550 PE=4 SV=1	5	23.548	0.00539339	2.26814	0.721351	1.64872	FALSE	21.7877878946377	21.674626880169	21.8230446229466	20.9285616839693	20.9509318448293	21.2419136450563
G4VAM6	tr|G4VAM6|G4VAM6_SCHMA Glucose-6-phosphate 1-dehydrogenase OS=Schistosoma mansoni GN=Smp_052810 PE=3 SV=1	14	47.348	0.00717739	2.14403	-0.596459	1.512	FALSE	21.8166895844009	21.8538266082146	21.7270893789011	22.345392575839	22.4563220685998	22.3852672172682
G4VAP5	tr|G4VAP5|G4VAP5_SCHMA Putative testis development protein nyd-sp29 OS=Schistosoma mansoni GN=Smp_136210 PE=4 SV=1	2	120.07	0.0112806	1.94767	-0.792469	1.73204	FALSE	16.3434331832842	16.8072297856977	16.6597997687265	17.6959651267722	17.2528759832054	17.2390290822541
G4VAQ2	tr|G4VAQ2|G4VAQ2_SCHMA Uncharacterized protein OS=Schistosoma mansoni GN=Smp_025860 PE=4 SV=1	6	9.0752	0.870022	0.0604697	0.0503177	1.03549	FALSE	24.424056787388	23.8854225296111	23.6602999680599	24.0155445112655	24.274041935286	23.5292398466934
G4VAQ6	tr|G4VAQ6|G4VAQ6_SCHMA Proteasome subunit beta type OS=Schistosoma mansoni GN=Smp_025800 PE=3 SV=1	8	23.157	0.835152	0.0782344	-0.0678929	1.04818	FALSE	21.6956566991486	21.7157259962359	22.4408813406087	22.2943382484814	21.5521026297795	22.2095018939772
G4VAR6	tr|G4VAR6|G4VAR6_SCHMA Hypoxia upregulated 1 (Hyou1)-related OS=Schistosoma mansoni GN=Smp_088950 PE=3 SV=1	19	95.219	0.0146934	1.83288	-0.747625	1.67903	FALSE	20.151191304933	20.2401445670412	19.7373555153677	20.7930541439674	20.5580969943148	21.0204165177899
G4VAS0	tr|G4VAS0|G4VAS0_SCHMA 40S ribosomal protein SA OS=Schistosoma mansoni GN=Smp_179180 PE=3 SV=1	9	33.295	0.30886	0.510238	0.176141	1.12986	FALSE	24.0266397123792	24.1526490399058	24.2733259132519	23.8984223192754	24.0364416591494	23.9893266442224
G4VAS2	tr|G4VAS2|G4VAS2_SCHMA Uncharacterized protein OS=Schistosoma mansoni GN=Smp_081920 PE=4 SV=1	4	14.552	0.142591	0.845907	0.406995	1.32592	FALSE	23.9716170640589	23.653132318634	23.195764841782	23.1751252197401	23.338468375634	23.085937093561
G4VAS5	tr|G4VAS5|G4VAS5_SCHMA Uncharacterized protein OS=Schistosoma mansoni GN=Smp_166340 PE=4 SV=1	2	14.439	0.00100751	2.99675	1.30641	2.47326	TRUE	23.1039801397849	22.4889599357427	22.5495952228748	21.3540828340745	21.3576156779588	21.511597975543
G4VAS9;G4VAT0	tr|G4VAS9|G4VAS9_SCHMA Cell polarity protein OS=Schistosoma mansoni GN=Smp_104030.3 PE=4 SV=1;tr|G4VAT0|G4VAT0_SCHMA Cell polarity protein OS=Schistosoma mansoni GN=Smp_104030.2 PE=4 SV=1	5	158.5	0.261068	0.583247	0.590771	1.50605	FALSE	17.1923825414989	17.0934466142976	15.6471210466575	16.5366142612957	15.7772988334799	15.8467230948695
G4VAU5	tr|G4VAU5|G4VAU5_SCHMA Uncharacterized protein (Fragment) OS=Schistosoma mansoni GN=Smp_121940 PE=4 SV=1	7	58.195	0.337499	0.471728	0.382461	1.30356	FALSE	18.037606013932	17.7617127128184	17.090699496673	16.6604983602403	17.4148650329937	17.6672710783784
G4VAU6	tr|G4VAU6|G4VAU6_SCHMA Uncharacterized protein OS=Schistosoma mansoni GN=Smp_121950 PE=4 SV=1	25	84.005	2.62519e-05	4.58084	2.25484	4.77281	TRUE	22.5869886094859	22.2956482312894	22.3465254913148	20.4157516875406	19.9594621660415	20.0894296629481
G4VAV1	tr|G4VAV1|G4VAV1_SCHMA Putative glycerol-3-phosphate dehydrogenase OS=Schistosoma mansoni GN=Smp_121990 PE=4 SV=1	26	75.137	0.634657	0.197461	-0.184741	1.13661	FALSE	21.8670345050525	20.9146384225518	22.1401655426379	22.1768340958825	21.5377711805307	21.7614569926291
G4VAV5	tr|G4VAV5|G4VAV5_SCHMA Sh3-containing grb2-like protein 1 (Endophilin II) OS=Schistosoma mansoni GN=Smp_122030 PE=4 SV=1	5	37.32	0.426143	0.370444	0.245946	1.18587	FALSE	20.7554627851505	20.4132735466207	20.8001107339754	19.944126418976	20.374776229117	20.9121060223624
G4VAX2	tr|G4VAX2|G4VAX2_SCHMA Uncharacterized protein OS=Schistosoma mansoni GN=Smp_025680 PE=4 SV=1	2	24.242	0.856849	0.0670959	-0.171076	1.1259	FALSE	16.1477795725556	18.446820419523	19.2564813207589	16.9623064034806	18.7439404567544	18.6580634437428
G4VAY0	tr|G4VAY0|G4VAY0_SCHMA Tyrosine kinase OS=Schistosoma mansoni GN=Smp_173380 PE=3 SV=1	6	166.66	0.0170288	1.76881	1.41978	2.67545	FALSE	17.3967094244889	16.8992656931716	16.6944431930807	14.9506217656939	15.3185072552774	16.4619441718477
G4VAY2	tr|G4VAY2|G4VAY2_SCHMA Uncharacterized protein Smp_200920 OS=Schistosoma mansoni GN=Smp_200920 PE=4 SV=1	2	10.828	0.0271907	1.56558	0.745138	1.67614	FALSE	20.908724560298	20.7212816640683	21.5183777445812	20.1433612416709	20.288343553475	20.4812637708008
G4VAZ9	tr|G4VAZ9|G4VAZ9_SCHMA Uncharacterized protein OS=Schistosoma mansoni GN=Smp_210440 PE=3 SV=1	16	56.686	0.188053	0.72572	-0.28304	1.21676	FALSE	21.622285024512	21.9316204433015	22.0653050522928	22.0182074909426	22.2920822469842	22.1580410040822
G4VB07;G4VB06	tr|G4VB07|G4VB07_SCHMA Putative alpha-actinin OS=Schistosoma mansoni GN=Smp_007270.2 PE=4 SV=1;tr|G4VB06|G4VB06_SCHMA Putative alpha-actinin OS=Schistosoma mansoni GN=Smp_007270.1 PE=4 SV=1	5	18.145	0.133219	0.875434	0.305212	1.2356	FALSE	22.4352536418267	22.3038109797895	22.0379280763916	22.0289145001796	21.9458102781525	21.8866312287692
G4VB16	tr|G4VB16|G4VB16_SCHMA Uncharacterized protein OS=Schistosoma mansoni GN=Smp_007170 PE=4 SV=1	7	41.157	0.727844	0.137962	-0.0994438	1.07136	FALSE	21.2160765805045	20.3860544338428	20.8784544998452	20.8301847300859	21.2191043556718	20.729627970577
G4VB23	tr|G4VB23|G4VB23_SCHMA Pol-related OS=Schistosoma mansoni GN=Smp_126020 PE=4 SV=1	17	62.925	0.00603933	2.21901	-0.705288	1.63047	FALSE	20.383042635074	20.4981730459837	20.644369249099	21.3445908373095	21.0643904791305	21.2324673937789
G4VB36	tr|G4VB36|G4VB36_SCHMA Uncharacterized protein OS=Schistosoma mansoni GN=Smp_173630 PE=4 SV=1	7	56.006	0.00193869	2.71249	2.83029	7.11216	TRUE	20.8474511636761	22.1609600501319	20.1197632176941	18.2781311098391	17.8072131935944	18.5519638197312
G4VB55	tr|G4VB55|G4VB55_SCHMA Glycine amidinotransferase OS=Schistosoma mansoni GN=Smp_144220 PE=4 SV=1	14	44.483	0.000262141	3.58146	-1.13801	2.20078	TRUE	21.5863558433534	21.6370965035636	21.6342959027235	22.6728205949444	22.7798956669913	22.8190723197719
G4VB57	tr|G4VB57|G4VB57_SCHMA Peptidylprolyl isomerase OS=Schistosoma mansoni GN=Smp_040500 PE=4 SV=1	10	39.397	0.505869	0.295962	-0.273557	1.20878	FALSE	18.6394044810423	19.6282042304039	19.9174382089016	20.0659476631816	19.3659554325128	19.5738141403945
G4VB63	tr|G4VB63|G4VB63_SCHMA Putative atp-dependent transporter OS=Schistosoma mansoni GN=Smp_040540 PE=4 SV=1	4	73.216	0.15023	0.823244	-1.31635	2.49035	FALSE	14.2283307302282	17.2872028347679	16.5501471389348	17.2917548146398	16.8986772041019	17.8242964958034
G4VB69;G4VB68	tr|G4VB69|G4VB69_SCHMA Putative rab5 OS=Schistosoma mansoni GN=Smp_040570.1 PE=4 SV=1;tr|G4VB68|G4VB68_SCHMA Putative rab5 OS=Schistosoma mansoni GN=Smp_040570.2 PE=4 SV=1	10	21.918	0.427493	0.369071	-0.149867	1.10947	FALSE	23.8909748801911	23.9682623546123	23.5736632590831	23.949079788725	23.9133372390201	24.0200838184939
G4VB70	tr|G4VB70|G4VB70_SCHMA Putative tensin OS=Schistosoma mansoni GN=Smp_144280 PE=4 SV=1	14	127.82	0.101455	0.993728	0.302424	1.23321	FALSE	19.7137014737446	19.5746415082422	19.5832378890687	19.3083519594986	19.2227270453874	19.4332290182665
G4VB71	tr|G4VB71|G4VB71_SCHMA Uncharacterized protein OS=Schistosoma mansoni GN=Smp_144290 PE=4 SV=1	5	79.225	0.114731	0.940319	-0.628103	1.54553	FALSE	18.9888969356845	18.3189234320731	17.8686742387114	18.7878731297233	19.3997989085204	18.8731307210537
G4VB75;G4VB73	tr|G4VB75|G4VB75_SCHMA Putative cytoplasmic dynein light chain OS=Schistosoma mansoni GN=Smp_040680 PE=4 SV=1;tr|G4VB73|G4VB73_SCHMA Uncharacterized protein Smp_200180 OS=Schistosoma mansoni GN=Smp_200180 PE=4 SV=1	5	10.327	0.000102899	3.98759	1.59911	3.02956	TRUE	27.5487512817153	27.4872093837546	27.1583383580848	25.8213395034089	25.8407262930656	25.734912829442
G4VB89	tr|G4VB89|G4VB89_SCHMA Uncharacterized protein OS=Schistosoma mansoni GN=Smp_152020 PE=4 SV=1	1	106.08	0.201994	0.694662	0.494116	1.40846	FALSE	15.2629549069547	15.2790158958402	15.1139971249411	15.48084896095	14.284785005471	14.40798471049
G4VB90	tr|G4VB90|G4VB90_SCHMA Putative ubiquitin-conjugating enzyme E2r OS=Schistosoma mansoni GN=Smp_055960 PE=3 SV=1	2	32.379	0.910325	0.0408035	-0.0259307	1.01814	FALSE	17.2764263492678	17.9349240664319	17.5976513251454	17.4754293931832	17.6991910152966	17.7121732977494
G4VBA8	tr|G4VBA8|G4VBA8_SCHMA Putative nucleolar protein c7c OS=Schistosoma mansoni GN=Smp_197020 PE=4 SV=1	6	65.617	0.847482	0.0718696	0.230145	1.17295	FALSE	14.0825453418771	17.0101923334976	16.1822933636519	14.6259766897051	14.2728824249109	17.6857356652704
G4VBD5;I6TMT9	tr|G4VBD5|G4VBD5_SCHMA Putative dead box ATP-dependent RNA helicase OS=Schistosoma mansoni GN=Smp_068440 PE=4 SV=1;tr|I6TMT9|I6TMT9_SCHMA Vasa-like DEAD-box RNA helicase (Fragment) OS=Schistosoma mansoni GN=vlg3 PE=2 SV=1	5	103.73	0.291842	0.534852	-0.378582	1.30006	FALSE	16.0535813196638	16.0872579678788	15.1542319560441	16.5051029932745	16.0672116411622	15.8585018896255
G4VBD6	tr|G4VBD6|G4VBD6_SCHMA Uncharacterized protein OS=Schistosoma mansoni GN=Smp_028870.1 PE=4 SV=1	2	22.005	0.0155593	1.80801	3.10347	8.59482	FALSE	18.3603239294156	17.8004363574761	19.4938247705575	14.6259766897051	14.2728824249109	17.4453223961742
G4VBF1	tr|G4VBF1|G4VBF1_SCHMA Mannose-1-phosphate guanyltransferase OS=Schistosoma mansoni GN=Smp_028730 PE=4 SV=1	8	35.084	0.563477	0.249124	0.139667	1.10165	FALSE	20.6152715118907	20.277451197664	20.8023827613985	20.5760958234827	20.1177853140583	20.5822220750483
G4VBG2	tr|G4VBG2|G4VBG2_SCHMA Putative ring finger protein 11 (Sid 1669) (Nedd4 ww domain-binding protein 2) OS=Schistosoma mansoni GN=Smp_047700 PE=4 SV=1	1	52.493	0.185701	0.731185	1.28567	2.43795	FALSE	17.7915666320026	17.1002236030798	17.8069831637884	17.0836733920861	14.2728824249109	17.4852061125454
G4VBG4	tr|G4VBG4|G4VBG4_SCHMA Ferritin OS=Schistosoma mansoni GN=Smp_047680 PE=3 SV=1	1	19.89	3.12899e-05	4.5046	3.36494	10.3026	TRUE	17.8537125251004	18.3661541761627	17.3059293077636	14.6259766897051	14.2728824249109	14.5321256808221
G4VBG5	tr|G4VBG5|G4VBG5_SCHMA Ferritin OS=Schistosoma mansoni GN=Smp_047660 PE=3 SV=1	6	20.934	0.00536811	2.27018	1.32868	2.51173	TRUE	22.9267769971391	23.817299563732	23.3121404646057	22.1131592308226	22.3512790052387	21.6057301178855
G4VBG8	tr|G4VBG8|G4VBG8_SCHMA Putative adp-ribosylglycohydrolase OS=Schistosoma mansoni GN=Smp_147630 PE=4 SV=1	5	39.532	0.882344	0.0543619	0.0433756	1.03052	FALSE	18.4409376214733	18.6889101403256	18.0243667220789	17.9506217656939	18.7217066195933	18.351759180391
G4VBH2	tr|G4VBH2|G4VBH2_SCHMA Uncharacterized protein OS=Schistosoma mansoni GN=Smp_210320 PE=4 SV=1	1	39.852	0.0094905	2.02271	0.755572	1.6883	FALSE	17.2260891715112	17.3502717004346	17.2836474911447	16.2479498205714	16.5142543855338	16.8310894784326
G4VBH5	tr|G4VBH5|G4VBH5_SCHMA Putative peptide chain release factor OS=Schistosoma mansoni GN=Smp_211090 PE=4 SV=1	5	49.071	0.0652158	1.18565	-0.637007	1.5551	FALSE	17.3762037690543	18.2815765982893	18.1875667586691	18.4302965494772	18.671632554978	18.6544381854528
G4VBI3	tr|G4VBI3|G4VBI3_SCHMA Putative snare protein ykt6 OS=Schistosoma mansoni GN=Smp_047450 PE=3 SV=1	2	22.752	0.219082	0.659393	0.343178	1.26855	FALSE	18.8184149906176	19.3537303501898	19.2609916614902	19.1454035557636	18.4976118131792	18.7605876173553
G4VBJ0	tr|G4VBJ0|G4VBJ0_SCHMA Malate dehydrogenase OS=Schistosoma mansoni GN=Smp_047370 PE=3 SV=1	17	36.328	0.00292901	2.53328	-1.1483	2.21653	TRUE	25.6460275612186	25.5010419372508	26.2314722820783	27.0367171444548	26.8255131991191	26.961224789197
G4VBJ1;G4VBJ2	tr|G4VBJ1|G4VBJ1_SCHMA Ubx6(Yeast)-related OS=Schistosoma mansoni GN=Smp_047360.2 PE=4 SV=1;tr|G4VBJ2|G4VBJ2_SCHMA Ubx6(Yeast)-related OS=Schistosoma mansoni GN=Smp_047360.1 PE=4 SV=1	5	34.608	0.302642	0.519071	0.318842	1.24733	FALSE	20.2851176585825	20.0693790851915	19.3894849867155	19.5031883346778	19.845401778003	19.4388652998179
G4VBM7	tr|G4VBM7|G4VBM7_SCHMA Protein RER1 OS=Schistosoma mansoni GN=Smp_099690 PE=3 SV=1	2	22.8	0.464653	0.332871	0.257088	1.19506	FALSE	18.0752945311392	17.3138438873287	18.210660999674	17.8407800315896	17.8403940290504	17.147362362864
G4VBN1	tr|G4VBN1|G4VBN1_SCHMA Fragile X related 1, frx1 OS=Schistosoma mansoni GN=Smp_099630 PE=4 SV=1	11	65.843	0.0137114	1.86292	-0.794947	1.73501	FALSE	19.0280280117518	19.3933214208906	19.676029160769	20.1811255196956	19.9504448591569	20.3506482823195
G4VBN6	tr|G4VBN6|G4VBN6_SCHMA Succinate--CoA ligase [GDP-forming] subunit beta, mitochondrial OS=Schistosoma mansoni GN=Smp_060820 PE=3 SV=1	3	47.941	0.0100591	1.99744	-1.82561	3.54458	FALSE	15.8045858553465	14.5011210631332	16.4215714877865	17.1998797559528	17.566601832645	17.4376368384005
G4VBP6	tr|G4VBP6|G4VBP6_SCHMA Putative small nuclear ribonucleoprotein f (Snrnp-f) OS=Schistosoma mansoni GN=Smp_060910 PE=3 SV=1	3	9.685	0.0675403	1.17044	2.89373	7.43189	FALSE	21.4494991440538	19.0049161932437	19.7647310284086	17.6948751295953	19.3109569626097	14.5321256808221
G4VBQ1	tr|G4VBQ1|G4VBQ1_SCHMA Putative soluble NSF attachment protein (SNAP) OS=Schistosoma mansoni GN=Smp_060950 PE=4 SV=1	13	32.485	0.642423	0.192179	0.0784311	1.05587	FALSE	21.9233849703884	21.8571948402161	22.0993762316108	21.7834476888926	21.9446929654485	21.9165219520604
G4VBQ9	tr|G4VBQ9|G4VBQ9_SCHMA Putative f-actin capping protein beta subunit (Fragment) OS=Schistosoma mansoni GN=Smp_100370 PE=4 SV=1	4	6.1999	0.435556	0.360956	0.156036	1.11422	FALSE	22.8169892821566	22.7450628900244	22.5117849891205	22.3639249744538	22.7496857154035	22.4921193755724
G4VBR8	tr|G4VBR8|G4VBR8_SCHMA Uncharacterized protein OS=Schistosoma mansoni GN=Smp_045300 PE=4 SV=1	7	21.464	0.00179594	2.74571	-1.18573	2.27479	TRUE	20.8148500749941	21.0004607124564	20.4399087735993	21.9414555578188	22.1548532451541	21.7161015939935
G4VBS3	tr|G4VBS3|G4VBS3_SCHMA Putative myosin light chain 1 OS=Schistosoma mansoni GN=Smp_045220 PE=4 SV=1	12	12.283	0.334098	0.476126	-0.239092	1.18025	FALSE	26.7263749408907	26.1892032777883	26.0490174737884	26.5910667037674	26.6525321735578	26.4382719507512
G4VBT2;G4VBT0;G4VBT1;G4VBS9	tr|G4VBT2|G4VBT2_SCHMA Putative serine/arginine rich splicing factor OS=Schistosoma mansoni GN=Smp_113620.1 PE=4 SV=1;tr|G4VBT0|G4VBT0_SCHMA Putative serine/arginine rich splicing factor OS=Schistosoma mansoni GN=Smp_113620.2 PE=4 SV=1;tr|G4VBT1|G4VBT1_SCH	3	11.963	0.130266	0.885169	0.546124	1.46016	FALSE	21.4299338868956	21.8113280868719	20.6839736779168	20.768854741482	20.6401937996354	20.8778142824814
G4VBT5	tr|G4VBT5|G4VBT5_SCHMA Putative f-actin capping protein beta subunit OS=Schistosoma mansoni GN=Smp_186650 PE=4 SV=1	5	27.082	0.460652	0.336627	-0.144008	1.10497	FALSE	21.070301783893	21.5174606226807	21.3952832353311	21.4073621401514	21.4757422738319	21.5319648516283
G4VBU3;G4VBU2	tr|G4VBU3|G4VBU3_SCHMA Uncharacterized protein Smp_014570.2 OS=Schistosoma mansoni GN=Smp_014570.2 PE=4 SV=1;tr|G4VBU2|G4VBU2_SCHMA Saposin containing protein OS=Schistosoma mansoni GN=Smp_014570.1 PE=4 SV=1	7	24.165	0.00124573	2.90458	1.15476	2.22648	TRUE	23.1175555935974	23.1425003000594	23.0427584833168	22.2873495507211	21.7621866557761	21.788990928875
G4VBU4	tr|G4VBU4|G4VBU4_SCHMA Saposin containing protein OS=Schistosoma mansoni GN=Smp_130100 PE=4 SV=1	3	14.771	0.00665332	2.17696	4.37842	20.7986	TRUE	21.8463945165536	20.7575877221644	20.8312684264021	17.7327476611698	14.2728824249109	18.2943688371151
G4VBU6	tr|G4VBU6|G4VBU6_SCHMA Proteasome endopeptidase complex OS=Schistosoma mansoni GN=Smp_207080 PE=3 SV=1	8	25.711	0.872452	0.0592583	0.0465655	1.0328	FALSE	21.6880308675397	22.0063354380468	21.0290450757337	21.442225055514	21.5591925041119	21.5822971938966
G4VBU8	tr|G4VBU8|G4VBU8_SCHMA Putative translation initiation factor eif-2b beta subunit OS=Schistosoma mansoni GN=Smp_014620 PE=3 SV=1	6	40.665	0.00454135	2.34281	-2.08535	4.24379	TRUE	17.8192769205233	16.0146081237747	16.9452423507152	19.272409349742	18.6702474757441	19.0925341189172
G4VBV1	tr|G4VBV1|G4VBV1_SCHMA 40S ribosomal protein S30 OS=Schistosoma mansoni GN=Smp_014650 PE=3 SV=1	1	14.695	0.368651	0.433385	0.318783	1.24728	FALSE	22.3225805141309	22.0113694565734	21.6627798415891	22.0763677784825	21.8862038202461	21.0778080153478
G4VBV6;G4VBV5	tr|G4VBV6|G4VBV6_SCHMA Adducin related protein OS=Schistosoma mansoni GN=Smp_014670.1 PE=4 SV=1;tr|G4VBV5|G4VBV5_SCHMA Adducin related protein OS=Schistosoma mansoni GN=Smp_014670.2 PE=4 SV=1	11	85.67	0.0355459	1.44921	-0.528221	1.44215	FALSE	19.9045341474701	20.0318634812775	20.214937679241	20.7996018651298	20.3341816502333	20.6022152731889
G4VBW4;G4VBW5	tr|G4VBW4|G4VBW4_SCHMA Putative alpha-actinin OS=Schistosoma mansoni GN=Smp_014780.2 PE=4 SV=1;tr|G4VBW5|G4VBW5_SCHMA Putative alpha-actinin OS=Schistosoma mansoni GN=Smp_014780.1 PE=4 SV=1	32	104.94	0.264109	0.578216	0.297174	1.22874	FALSE	22.8213577942841	22.8703419172894	22.1580837544546	22.2079875683755	22.3442525360821	22.406020241833
G4VBW8;G4VBW9	tr|G4VBW8|G4VBW8_SCHMA Actin-related protein 2, arp2 OS=Schistosoma mansoni GN=Smp_101290.2 PE=3 SV=1;tr|G4VBW9|G4VBW9_SCHMA Actin-related protein 2, arp2 OS=Schistosoma mansoni GN=Smp_101290.1 PE=3 SV=1	10	43.435	0.424159	0.372471	-0.225917	1.16952	FALSE	21.3613982686725	22.087327738005	22.0716677857855	21.8985816488375	22.3109298644017	21.9886324993746
G4VBX0;G4VBX1	tr|G4VBX0|G4VBX0_SCHMA PRA1 family protein OS=Schistosoma mansoni GN=Smp_014800.1 PE=3 SV=1;tr|G4VBX1|G4VBX1_SCHMA PRA1 family protein OS=Schistosoma mansoni GN=Smp_014800.2 PE=3 SV=1	1	16.306	0.990994	0.00392911	0.00188919	1.00131	FALSE	19.1896447683212	19.3490566251104	19.4432344001755	19.3902733922594	19.2330375486057	19.3529572858162
G4VBY2;G4VBY1	tr|G4VBY2|G4VBY2_SCHMA Putative sumo-1-activating enzyme E1a OS=Schistosoma mansoni GN=Smp_048760.1 PE=4 SV=1;tr|G4VBY1|G4VBY1_SCHMA Putative sumo-1-activating enzyme E1a OS=Schistosoma mansoni GN=Smp_048760.2 PE=4 SV=1	4	39.189	1.67235e-05	4.77667	2.06824	4.19374	TRUE	18.2998080807295	18.13087381592	17.9755068390152	16.1353947446705	16.0714151516494	15.9946640708314
G4VBY8	tr|G4VBY8|G4VBY8_SCHMA Uncharacterized protein OS=Schistosoma mansoni GN=Smp_048830 PE=4 SV=1	2	10.98	0.172551	0.763082	-2.32924	5.02542	FALSE	20.3056517318074	19.2551831814071	14.4707619788912	20.8174322833519	19.6403318334615	20.5615669383682
G4VBZ1	tr|G4VBZ1|G4VBZ1_SCHMA Uncharacterized protein OS=Schistosoma mansoni GN=Smp_148320 PE=4 SV=1	1	16.186	0.0349885	1.45608	-4.22123	18.6517	FALSE	14.2283307302282	19.9970976701471	14.4707619788912	20.3460937317527	20.187572611535	20.8262261153074
G4VBZ2	tr|G4VBZ2|G4VBZ2_SCHMA Divalent cation tolerance cuta-related OS=Schistosoma mansoni GN=Smp_048870 PE=4 SV=1	1	14.517	0.511873	0.290838	-0.22667	1.17013	FALSE	19.0571417718633	18.403244792301	18.1996198474088	19.045125656706	19.0058128821344	18.2890766953064
G4VBZ3	tr|G4VBZ3|G4VBZ3_SCHMA Uncharacterized protein OS=Schistosoma mansoni GN=Smp_048880 PE=4 SV=1	4	13.373	0.00728909	2.13733	-0.70317	1.62808	FALSE	20.6250717825309	20.5939330986889	20.4957811650672	21.3951535356055	21.0360810632432	21.3930605396389
G4VBZ8	tr|G4VBZ8|G4VBZ8_SCHMA Williams-beuren syndrome critical region protein-related OS=Schistosoma mansoni GN=Smp_048940 PE=4 SV=1	2	25.75	0.557167	0.254015	-0.143027	1.10422	FALSE	19.3696810387059	19.3671506272493	19.0002902302607	19.0285651169045	19.5171361123427	19.6205020818284
G4VBZ9	tr|G4VBZ9|G4VBZ9_SCHMA Putative uveal autoantigen with coiled-coil domains and ankyrin repeats protein (Beta-actin-binding protein) (BetaCAP73) OS=Schistosoma mansoni GN=Smp_148370 PE=4 SV=1	2	164.66	0.27373	0.562678	-0.420683	1.33856	FALSE	14.6669688407972	13.7516206773581	14.044036990585	15.1350733133465	14.2704445469649	14.3191582215588
G4VC04	tr|G4VC04|G4VC04_SCHMA Rna-binding protein related OS=Schistosoma mansoni GN=Smp_049010 PE=4 SV=1	2	69.59	0.621649	0.206454	-0.225127	1.16888	FALSE	17.4948414150027	17.6140467139092	16.4788393701757	16.7314806871576	17.8140820147902	17.7175454490289
G4VC11	tr|G4VC11|G4VC11_SCHMA Putative chitinase OS=Schistosoma mansoni GN=Smp_148450 PE=4 SV=1	6	49.215	0.601197	0.220983	-0.17442	1.12851	FALSE	18.6521098246604	19.5855714022836	19.502731925842	19.0879751978217	19.5109215670587	19.6647760466348
G4VC15	tr|G4VC15|G4VC15_SCHMA Aspartate aminotransferase OS=Schistosoma mansoni GN=Smp_049150 PE=4 SV=1	12	45.644	0.14457	0.839922	0.437561	1.35431	FALSE	21.1673278734783	21.6071318013271	21.3649178891144	20.8365189299265	21.3898890627258	20.6002877255711
G4VC17	tr|G4VC17|G4VC17_SCHMA Putative camp-regulated phosphoprotein OS=Schistosoma mansoni GN=Smp_049170 PE=3 SV=1	1	14.25	0.171366	0.766076	2.35375	5.11151	FALSE	20.4626351691662	20.2272570220001	20.9402837133794	19.8207030476648	20.2160977762682	14.5321256808221
G4VC21	tr|G4VC21|G4VC21_SCHMA Uncharacterized protein OS=Schistosoma mansoni GN=Smp_148510 PE=3 SV=1	8	41.774	0.382826	0.416998	0.179663	1.13262	FALSE	20.1978425507278	20.1563117842868	20.3999028912293	19.8455670395993	20.3094386785808	20.0600632564625
G4VC25	tr|G4VC25|G4VC25_SCHMA Rab GDP dissociation inhibitor OS=Schistosoma mansoni GN=Smp_094420 PE=3 SV=1	23	50.273	0.0307694	1.51188	0.529146	1.44307	FALSE	24.1522209810881	24.4982022004673	24.6283436597134	23.8188761817619	23.9718382074128	23.9006151648084
G4VC26	tr|G4VC26|G4VC26_SCHMA Rab GDP dissociation inhibitor OS=Schistosoma mansoni GN=Smp_024520 PE=3 SV=1	17	50.729	0.0292246	1.53425	-0.472563	1.38757	FALSE	22.7337219104731	23.0469216179964	22.7805246111431	23.2744980375638	23.3370053982835	23.3673533819857
G4VC30	tr|G4VC30|G4VC30_SCHMA Uncharacterized protein OS=Schistosoma mansoni GN=Smp_181130 PE=4 SV=1	3	54.759	0.534549	0.272013	0.444326	1.36068	FALSE	16.6645266266928	14.5011210631332	16.9997623398896	15.2736959178698	15.934734491649	15.6240004400438
G4VC40	tr|G4VC40|G4VC40_SCHMA Uncharacterized protein OS=Schistosoma mansoni GN=Smp_181070 PE=4 SV=1	3	13.997	0.401919	0.395861	0.433968	1.35094	FALSE	21.1776335510756	21.2052090678843	20.2204860281649	21.338966157588	19.8496462325584	20.1128119105953
G4VC55;Q1WL54;G4VC56	tr|G4VC55|G4VC55_SCHMA Venom allergen-like (VAL) 11 protein OS=Schistosoma mansoni GN=Smp_012350.1 PE=4 SV=1;tr|Q1WL54|Q1WL54_SCHMA Venom allergen-like protein 11 OS=Schistosoma mansoni PE=2 SV=1;tr|G4VC56|G4VC56_SCHMA Venom allergen-like (VAL) 11 protein	9	44.905	0.245803	0.609413	0.244691	1.18484	FALSE	21.1330118630282	21.2643456264735	20.8943197836197	20.7055300831142	21.0618807161765	20.7901945980697
G4VC58	tr|G4VC58|G4VC58_SCHMA Ubiquitin-specific peptidase 4 (C19 family) OS=Schistosoma mansoni GN=Smp_128770 PE=3 SV=1	11	98.829	0.178349	0.74873	-0.670494	1.59162	FALSE	18.9427984943925	19.1051630310052	17.6007489002288	19.351557735021	18.8703007522584	19.4383342016214
G4VC62	tr|G4VC62|G4VC62_SCHMA Uncharacterized protein OS=Schistosoma mansoni GN=Smp_012280 PE=4 SV=1	3	37.278	0.285653	0.544161	-0.372963	1.29501	FALSE	17.1775215217455	17.4909010404133	17.6634928849472	18.421655664397	17.6782355981694	17.3509128594589
G4VC69	tr|G4VC69|G4VC69_SCHMA Putative tryptophanyl-tRNA synthetase OS=Schistosoma mansoni GN=Smp_082860 PE=3 SV=1	11	47.067	0.418401	0.378407	0.148308	1.10827	FALSE	21.1690193027567	21.0935546796073	21.2477269045741	21.0346008639893	21.1948156925269	20.8359617044321
G4VC76;Q8I899	tr|G4VC76|G4VC76_SCHMA Cell polarity protein OS=Schistosoma mansoni GN=Smp_082810.2 PE=3 SV=1;tr|Q8I899|Q8I899_SCHMA Cdc42 (Fragment) OS=Schistosoma mansoni GN=Cdc42 PE=2 SV=1	3	21.839	0.240385	0.619093	0.376419	1.29812	FALSE	21.5303366620168	22.3746339150345	22.0707256346532	21.3650619993708	21.9685952500381	21.5127808357139
G4VC78	tr|G4VC78|G4VC78_SCHMA Sly1-related OS=Schistosoma mansoni GN=Smp_082800 PE=3 SV=1	13	66.719	0.00463652	2.33381	-0.784147	1.72207	FALSE	18.8553319912519	18.9715042208466	18.8469246553209	19.4451575537416	19.8674439586217	19.7136005131105
G4VC82	tr|G4VC82|G4VC82_SCHMA Putative talin OS=Schistosoma mansoni GN=Smp_167010 PE=4 SV=1	11	348.53	0.0825361	1.08336	1.50352	2.83533	FALSE	14.631523675033	14.5011210631332	16.525860483868	13.8507448277911	12.675099552074	14.6221076451901
G4VC85	tr|G4VC85|G4VC85_SCHMA Putative pdz domain containing protein OS=Schistosoma mansoni GN=Smp_082740 PE=4 SV=1	3	29.125	1.98941e-05	4.70128	4.16554	17.9454	TRUE	18.5273996438179	19.0319762591671	19.2090381133881	14.6259766897051	14.2728824249109	15.372924201104
G4VC95	tr|G4VC95|G4VC95_SCHMA Farnesylated-protein converting enzyme 1 (M48 family) OS=Schistosoma mansoni GN=Smp_082620 PE=4 SV=1	9	54.93	0.11187	0.951285	0.776908	1.71345	FALSE	20.3461956298558	20.3363013986457	19.4575931101952	19.0620673752851	18.7451282432616	20.0021716153124
G4VC98	tr|G4VC98|G4VC98_SCHMA ADP-ribosylation factor-like 10, arl10 OS=Schistosoma mansoni GN=Smp_166930 PE=3 SV=1	4	21.227	0.826211	0.082909	0.0619521	1.04388	FALSE	19.6978715201638	20.3391688032304	20.0163567894676	19.9463300165342	19.5973582635626	20.3238526329924
G4VC99	tr|G4VC99|G4VC99_SCHMA Uncharacterized protein (Fragment) OS=Schistosoma mansoni GN=Smp_166920 PE=4 SV=1	3	30.723	0.0989849	1.00443	-0.788313	1.72705	FALSE	17.4165058509144	18.9191226657686	18.6233142558278	19.0686366299368	19.1976441505459	19.0576014663391
G4VCA3	tr|G4VCA3|G4VCA3_SCHMA Uncharacterized protein OS=Schistosoma mansoni GN=Smp_156510 PE=4 SV=1	3	49.367	0.216792	0.663957	-0.506236	1.42034	FALSE	18.2010302864569	18.1302117669128	17.2170838897173	17.9409649947861	18.8472266301917	18.2788417590807
G4VCB9	tr|G4VCB9|G4VCB9_SCHMA Uncharacterized protein OS=Schistosoma mansoni GN=Smp_023170 PE=4 SV=1	2	44.249	0.213202	0.671209	0.550077	1.46416	FALSE	18.0681145298578	18.1965102947172	17.2813326971609	17.003794042359	16.901328899893	17.9906035647747
G4VCC0	tr|G4VCC0|G4VCC0_SCHMA V-type proton ATPase subunit F OS=Schistosoma mansoni GN=Smp_023160 PE=3 SV=1	4	13.501	0.678012	0.168763	0.149097	1.10888	FALSE	20.5901482838618	20.4095581311218	19.6565884261854	20.1140220163677	20.4778196584272	19.6171624067631
G4VCF5	tr|G4VCF5|G4VCF5_SCHMA Putative eukaryotic translation initiation factor 4e OS=Schistosoma mansoni GN=Smp_001500 PE=3 SV=1	4	24.087	0.849823	0.0706715	0.0717049	1.05096	FALSE	19.5551059359784	18.7772502329024	20.1008811054327	19.5498449595402	19.1346879513071	19.5335896178089
G4VCF9	tr|G4VCF9|G4VCF9_SCHMA Putative beta-arrestin 1 OS=Schistosoma mansoni GN=Smp_122900 PE=4 SV=1	7	31.717	0.309706	0.509051	0.611516	1.52786	FALSE	21.3738915746134	21.4520194566055	19.9267247815896	20.5376785968194	20.8915772627891	19.4888331941978
G4VCG4	tr|G4VCG4|G4VCG4_SCHMA Acyl-CoA dehydrogenase OS=Schistosoma mansoni GN=Smp_122930 PE=4 SV=1	6	62.852	0.0188808	1.72398	-1.02995	2.04195	FALSE	16.5530041004617	16.0473153925342	16.6986705344889	16.8809628736459	17.6905520970228	17.8173182054806
G4VCG8	tr|G4VCG8|G4VCG8_SCHMA V-type proton ATPase subunit G OS=Schistosoma mansoni GN=Smp_001640 PE=3 SV=1	3	13.806	0.0361812	1.44152	0.507235	1.42132	FALSE	20.684005634633	21.0774879164603	20.7381645164114	20.4628747578852	20.1703500976231	20.3447267150427
G4VCH8	tr|G4VCH8|G4VCH8_SCHMA Putative cationic amino acid transporter OS=Schistosoma mansoni GN=Smp_123010 PE=4 SV=1	2	74.256	5.45928e-05	4.26286	2.00235	4.00651	TRUE	18.0113075270627	18.0824123269634	18.1655618463943	16.2215263071695	15.7653496231373	16.2653632300676
G4VCI0	tr|G4VCI0|G4VCI0_SCHMA Putative centaurin alpha OS=Schistosoma mansoni GN=Smp_123030 PE=4 SV=1	7	45.686	0.141727	0.848549	0.74807	1.67954	FALSE	17.7707920411418	17.978710253642	17.6008262544575	17.7887968696744	16.0903122035595	17.2270100627826
G4VCJ0;O02034	tr|G4VCJ0|G4VCJ0_SCHMA Putative amidase OS=Schistosoma mansoni GN=Smp_004220 PE=4 SV=1;tr|O02034|O02034_SCHMA Amidase OS=Schistosoma mansoni PE=2 SV=1	9	67.867	0.706561	0.15085	-0.360917	1.28424	FALSE	17.0613304317008	16.9946694323217	19.5214253544888	19.0262337302702	16.771361808472	18.8625800806525
G4VCJ4	tr|G4VCJ4|G4VCJ4_SCHMA Coatomer subunit beta OS=Schistosoma mansoni GN=Smp_124430 PE=4 SV=1	16	106.8	0.272768	0.564207	-0.357304	1.28103	FALSE	19.9996107316377	20.2797596188535	19.2624104813341	20.2225157900193	20.0407944735045	20.3503836566502
G4VCJ7	tr|G4VCJ7|G4VCJ7_SCHMA Uncharacterized protein OS=Schistosoma mansoni GN=Smp_004280 PE=4 SV=1	2	17.563	0.037105	1.43057	-2.4633	5.51475	FALSE	18.1424427395882	17.1510700837717	14.4707619788912	19.4075220930359	19.0222979612234	18.7243415504975
G4VCJ9	tr|G4VCJ9|G4VCJ9_SCHMA Putative dihydrolipoamide succinyltransferase component of 2-oxoglutarate dehydrogenase OS=Schistosoma mansoni GN=Smp_104330 PE=4 SV=1	9	46.491	0.00175102	2.75671	-0.984417	1.97851	FALSE	21.6765380249584	21.6196749481012	22.0233210164836	22.6343860102195	22.8167944587659	22.8216040487549
G4VCN1;G4VCN0	tr|G4VCN1|G4VCN1_SCHMA Putative fatty acid binding protein OS=Schistosoma mansoni GN=Smp_046800.1 PE=4 SV=1;tr|G4VCN0|G4VCN0_SCHMA Putative fatty acid binding protein OS=Schistosoma mansoni GN=Smp_046800.2 PE=4 SV=1	6	15.1	0.00331298	2.47978	-1.14467	2.21095	TRUE	23.8548455638422	24.0774684035736	23.3151933203894	25.0296680896522	24.8962355714872	24.755606828467
G4VCN8	tr|G4VCN8|G4VCN8_SCHMA Dihydrolipoyl dehydrogenase OS=Schistosoma mansoni GN=Smp_046740 PE=3 SV=1	17	52.868	0.00081193	3.09048	-1.07689	2.10949	TRUE	22.9609348554042	22.8131807177271	23.2182818534589	24.0559008014528	24.0743701334236	24.0928083414031
G4VCQ7	tr|G4VCQ7|G4VCQ7_SCHMA Putative aldehyde dehydrogenase OS=Schistosoma mansoni GN=Smp_065060 PE=4 SV=1	16	56.327	0.106044	0.974516	-0.323432	1.2513	FALSE	21.6553760183669	21.8574675957703	21.5014376806302	21.9101880131637	22.0302992373245	22.0440896475527
G4VCR0	tr|G4VCR0|G4VCR0_SCHMA Putative lim domain OS=Schistosoma mansoni GN=Smp_157310 PE=4 SV=1	4	47.98	2.16983e-05	4.66357	-4.05699	16.6447	TRUE	14.2283307302282	14.5011210631332	14.4707619788912	19.0298956482548	18.5707721556489	17.7705110887163
G4VCR1	tr|G4VCR1|G4VCR1_SCHMA Putative leucine zipper-ef-hand containing transmembrane protein OS=Schistosoma mansoni GN=Smp_065110 PE=4 SV=1	19	90.046	0.0984	1.007	-0.774757	1.7109	FALSE	19.7063691336981	18.8238141759944	20.2178406141201	20.5833069005495	19.9686983131803	20.5202890542601
G4VCS0	tr|G4VCS0|G4VCS0_SCHMA Eh domain containing/past-1-related OS=Schistosoma mansoni GN=Smp_065180 PE=3 SV=1	11	58.078	0.486249	0.313141	0.150305	1.1098	FALSE	19.8400619233069	19.6615343277651	19.3664883987446	19.6485301925397	19.4903364053386	19.2783039901147
G4VCS1	tr|G4VCS1|G4VCS1_SCHMA Uncharacterized protein OS=Schistosoma mansoni GN=Smp_065190.2 PE=4 SV=1	3	26.351	0.0051981	2.28416	0.786711	1.72514	FALSE	20.8975078500303	20.6990309278856	20.9943550189762	19.9205589856166	20.0223773996795	20.2878243238082
G4VCS4;G4VCS5;G4VCS6	tr|G4VCS4|G4VCS4_SCHMA Uncharacterized protein OS=Schistosoma mansoni GN=Smp_065210.2 PE=4 SV=1;tr|G4VCS5|G4VCS5_SCHMA Uncharacterized protein OS=Schistosoma mansoni GN=Smp_065210.4 PE=4 SV=1;tr|G4VCS6|G4VCS6_SCHMA Uncharacterized protein OS=Schistosoma ma	7	35.15	0.0362702	1.44045	-0.747493	1.67887	FALSE	21.1468109377554	21.1089863624444	20.3108554496649	21.4313793230845	21.5906503829757	21.7871020727955
G4VCT1	tr|G4VCT1|G4VCT1_SCHMA Uncharacterized protein OS=Schistosoma mansoni GN=Smp_065280 PE=4 SV=1	2	12.723	0.0535465	1.27127	-0.579587	1.49442	FALSE	21.0867007674143	21.0472006191517	20.3928840899746	21.4109089276774	21.5602871826652	21.2943504951678
G4VCT2	tr|G4VCT2|G4VCT2_SCHMA Putative calcium/calmodulin-dependent protein kinase OS=Schistosoma mansoni GN=Smp_065290 PE=3 SV=1	9	48.01	0.536608	0.270343	-0.112221	1.08089	FALSE	19.7342763203281	19.8483935819717	19.9951938935856	19.9291411601332	20.1363771609557	19.849007640148
G4VCT4	tr|G4VCT4|G4VCT4_SCHMA Uncharacterized protein OS=Schistosoma mansoni GN=Smp_157380 PE=4 SV=1	35	308.01	1.15958e-05	4.9357	4.85139	28.8678	TRUE	22.5534233696059	22.5514347149122	23.0324184593717	18.5540588332401	17.2488078489911	17.7802358010786
G4VCT5	tr|G4VCT5|G4VCT5_SCHMA Uncharacterized protein (Fragment) OS=Schistosoma mansoni GN=Smp_184180 PE=4 SV=1	1	39.63	1.59638e-07	6.79686	5.51997	45.8857	TRUE	19.9764726067484	19.7432731529863	20.234638191618	14.5894560425389	14.2728824249109	14.5321256808221
G4VCT8	tr|G4VCT8|G4VCT8_SCHMA Uncharacterized protein OS=Schistosoma mansoni GN=Smp_157410 PE=4 SV=1	65	529.79	0.420271	0.376471	0.683635	1.60618	FALSE	18.4732613803949	16.9983679750125	19.4811691945071	18.8295354523788	16.7573026875512	17.3150561244076
G4VCW5	tr|G4VCW5|G4VCW5_SCHMA MEG-8 family OS=Schistosoma mansoni GN=Smp_171190 PE=4 SV=1	3	20.959	0.0029548	2.52947	-5.37926	41.6216	TRUE	14.2283307302282	14.5011210631332	18.3710536416257	20.7004735687883	21.3842853582389	21.1535232320966
G4VCW8	tr|G4VCW8|G4VCW8_SCHMA Phosphatase 2a regulatory subunit-related OS=Schistosoma mansoni GN=Smp_089930 PE=4 SV=1	2	96.155	0.18946	0.722482	0.403688	1.32289	FALSE	14.7654486220948	15.6475586995123	15.1056480210157	14.9225589010556	14.8529077609754	14.5321256808221
G4VCY0	tr|G4VCY0|G4VCY0_SCHMA Strictosidine synthase-related OS=Schistosoma mansoni GN=Smp_161220 PE=4 SV=1	3	41.734	0.0910178	1.04087	0.764183	1.69841	FALSE	18.3832585265882	19.1627121714467	19.7260702604466	17.9616442410693	18.5232865801233	18.4945601499317
G4VCY4	tr|G4VCY4|G4VCY4_SCHMA 6-phosphogluconate dehydrogenase, decarboxylating OS=Schistosoma mansoni GN=Smp_071840 PE=3 SV=1	14	41.761	0.0870637	1.06016	-0.383436	1.30444	FALSE	22.9824167204325	23.1654465260523	23.4620603715594	23.4919333644295	23.6264757244591	23.6418217269047
G4VD08	tr|G4VD08|G4VD08_SCHMA Putative ran gtpase-activating protein OS=Schistosoma mansoni GN=Smp_166310 PE=4 SV=1	8	81.26	0.0097865	2.00937	-1.45143	2.73479	TRUE	16.2861201605926	15.2597304049492	14.8406497847944	17.0891084823248	16.7222609567501	16.9294175962864
G4VD10	tr|G4VD10|G4VD10_SCHMA Serine/threonine-protein phosphatase 2A activator OS=Schistosoma mansoni GN=Smp_166290 PE=3 SV=1	5	42.051	0.341293	0.466872	0.214274	1.16012	FALSE	20.0383739009049	20.3385176206236	20.4896324933979	20.1237124371283	20.2640269571932	19.8359617044321
G4VD16	tr|G4VD16|G4VD16_SCHMA Uncharacterized protein OS=Schistosoma mansoni GN=Smp_023940 PE=4 SV=1	7	168.7	0.010514	1.97823	-1.76881	3.40773	FALSE	13.476195220353	14.9433497708452	14.4707619788912	16.2394640292337	15.373149272822	16.5841288828022
G4VD23;G4VD22	tr|G4VD23|G4VD23_SCHMA Putative microtubule-associated protein OS=Schistosoma mansoni GN=Smp_135080.2 PE=4 SV=1;tr|G4VD22|G4VD22_SCHMA Putative microtubule-associated protein OS=Schistosoma mansoni GN=Smp_135080.1 PE=4 SV=1	23	98.903	0.0261925	1.58182	-0.467018	1.38225	FALSE	22.1002256170497	22.0691121912788	22.0189497026196	22.6881756004073	22.4753554534279	22.4258093355579
G4VD32	tr|G4VD32|G4VD32_SCHMA Phosphodiesterase OS=Schistosoma mansoni GN=Smp_044060 PE=3 SV=1	4	54.566	0.0138302	1.85917	-1.80202	3.48708	FALSE	15.7959453879817	15.8101486686892	14.2406476884846	16.5019424425798	17.6387781909426	17.11208367079
G4VD41;G4VD40;G4VD39	tr|G4VD41|G4VD41_SCHMA Basigin related OS=Schistosoma mansoni GN=Smp_043990.2 PE=4 SV=1;tr|G4VD40|G4VD40_SCHMA Basigin related OS=Schistosoma mansoni GN=Smp_043990.3 PE=4 SV=1;tr|G4VD39|G4VD39_SCHMA Basigin related OS=Schistosoma mansoni GN=Smp_043990.1 PE	4	39.054	0.429897	0.366636	-0.189112	1.14006	FALSE	18.7831814073906	19.1068771364471	19.1169804122729	19.0942529212221	18.942714597293	19.5374072178428
G4VD44	tr|G4VD44|G4VD44_SCHMA Tetraspanin OS=Schistosoma mansoni GN=Smp_173150 PE=3 SV=1	2	24.133	0.00362787	2.44035	1.24335	2.36748	TRUE	21.1737073391198	20.317523052172	20.4724023157808	19.2592816588685	19.5680356075468	19.4062578845596
G4VD59;G4VD58;Q7JQ21;Q26583;G4VD60	tr|G4VD59|G4VD59_SCHMA Peptidylprolyl isomerase OS=Schistosoma mansoni GN=Smp_004780.1 PE=4 SV=1;tr|G4VD58|G4VD58_SCHMA Peptidylprolyl isomerase OS=Schistosoma mansoni GN=Smp_004780.2 PE=4 SV=1;tr|Q7JQ21|Q7JQ21_SCHMA Peptidylprolyl isomerase OS=Schistosoma	23	48.123	0.669776	0.17407	0.0699235	1.04966	FALSE	23.1459682559607	23.0674429847512	23.3112543699055	23.1420544874086	23.1011461984543	23.071694382565
G4VD74;G4VD73	tr|G4VD74|G4VD74_SCHMA Uncharacterized protein OS=Schistosoma mansoni GN=Smp_128280.2 PE=4 SV=1;tr|G4VD73|G4VD73_SCHMA Uncharacterized protein OS=Schistosoma mansoni GN=Smp_128280.1 PE=4 SV=1	8	76.678	0.0706405	1.15095	0.61496	1.53152	FALSE	17.7461595768934	17.2560937734281	17.4810431270435	17.093187315391	17.1788801531033	16.3663504050553
G4VD77	tr|G4VD77|G4VD77_SCHMA Uncharacterized protein OS=Schistosoma mansoni GN=Smp_128230 PE=4 SV=1	3	59.456	0.491079	0.308849	-0.210223	1.15687	FALSE	17.3043298519283	17.5463625381222	16.5540036519083	17.2821842940815	17.4512759245468	17.3019059488897
G4VD85;G4VD84;G4VD83	tr|G4VD85|G4VD85_SCHMA Putative sj-Ts4 protein OS=Schistosoma mansoni GN=Smp_011270.3 PE=4 SV=1;tr|G4VD84|G4VD84_SCHMA Putative sj-Ts4 protein OS=Schistosoma mansoni GN=Smp_011270.1 PE=4 SV=1;tr|G4VD83|G4VD83_SCHMA Putative sj-Ts4 protein OS=Schistosoma ma	6	29.68	0.395178	0.403207	-0.517239	1.43121	FALSE	19.2552331099487	18.2398935204465	19.1608999612943	19.6652151560751	18.2851469936475	20.2573801083512
G4VD88	tr|G4VD88|G4VD88_SCHMA Glycosylphosphatidylinositol:protein transamidase (C13 family) OS=Schistosoma mansoni GN=Smp_011230 PE=4 SV=1	2	27.913	0.00474851	2.32344	-2.19355	4.57429	TRUE	13.9407639816298	15.7545604224485	15.3874506422191	17.6180906586687	17.0313258885843	17.0140041094363
G4VD99	tr|G4VD99|G4VD99_SCHMA Methionine aminopeptidase 2 OS=Schistosoma mansoni GN=Smp_011120 PE=3 SV=1	5	51.94	0.521624	0.282642	-0.162803	1.11946	FALSE	18.2134684409382	18.1329182305242	17.4885877435218	18.0152254628297	18.1464467970272	18.1617104168464
G4VDB2	tr|G4VDB2|G4VDB2_SCHMA Putative rab geranylgeranyl transferase alpha subunit OS=Schistosoma mansoni GN=Smp_208010 PE=4 SV=1	5	74.594	0.439468	0.357073	-0.329441	1.25653	FALSE	15.9085355780419	15.1981652361558	16.3075605863501	16.768535966683	15.836543952434	15.7975043125206
G4VDC1	tr|G4VDC1|G4VDC1_SCHMA Uncharacterized protein OS=Schistosoma mansoni GN=Smp_125480 PE=4 SV=1	4	56.504	0.331691	0.479266	-0.226004	1.16959	FALSE	19.1723087736998	18.9540614572076	18.909903235479	19.2501776567962	19.5372894607853	18.9268169096789
G4VDC3	tr|G4VDC3|G4VDC3_SCHMA Uncharacterized protein OS=Schistosoma mansoni GN=Smp_125500 PE=4 SV=1	7	56.532	0.644118	0.191035	-0.268835	1.20483	FALSE	18.516142780434	16.7809820776187	18.8822940204714	18.4587807438759	18.1823444641703	18.3447975638882
G4VDD2	tr|G4VDD2|G4VDD2_SCHMA Eukaryotic translation initiation factor 5A OS=Schistosoma mansoni GN=Smp_039400 PE=3 SV=1	6	17.752	0.510454	0.292043	-0.187583	1.13885	FALSE	23.3218204378944	23.1136752064609	22.5738603014628	23.2620795364924	23.4330060759682	22.8770184141142
G4VDE6;G4VDE5	tr|G4VDE6|G4VDE6_SCHMA Spectrin beta chain OS=Schistosoma mansoni GN=Smp_143470.2 PE=3 SV=1;tr|G4VDE5|G4VDE5_SCHMA Putative spectrin beta chain, brain 3 (Spectrin, non-erythroid beta chain 3) (Beta-IV spectrin) OS=Schistosoma mansoni GN=Smp_143470.1 PE=4 S	108	270.81	0.101307	0.99436	-0.322117	1.25016	FALSE	23.8055567717074	23.8462192107373	23.6185275487015	24.1159613993654	23.933366375709	24.1873259401874
G4VDF4	tr|G4VDF4|G4VDF4_SCHMA Putative translation initiation factor IF-2 OS=Schistosoma mansoni GN=Smp_006990 PE=4 SV=1	2	73.622	0.683551	0.165229	0.323052	1.25097	FALSE	15.1688715383744	15.3461932761726	17.9161333053622	16.1392216879377	15.8114610031539	15.5113597090323
G4VDG3;G4VDG2;G4VDG1	tr|G4VDG3|G4VDG3_SCHMA Proteasome subunit alpha type OS=Schistosoma mansoni GN=Smp_032580.2 PE=3 SV=1;tr|G4VDG2|G4VDG2_SCHMA Proteasome subunit alpha type OS=Schistosoma mansoni GN=Smp_032580.3 PE=3 SV=1;tr|G4VDG1|G4VDG1_SCHMA Proteasome subunit alpha type	13	27.27	0.625937	0.203469	-0.0912805	1.06532	FALSE	22.7164115340635	23.0312108075141	22.6818728205422	22.8725843712022	23.0230557583036	22.8076965207162
G4VDG5	tr|G4VDG5|G4VDG5_SCHMA Putative ubiquitin-protein ligase BRE1 OS=Schistosoma mansoni GN=Smp_139810 PE=4 SV=1	27	193.06	0.128427	0.891343	-0.358203	1.28183	FALSE	21.7303103555697	21.4182125964323	21.1295816248608	21.7951829695398	21.7306072806569	21.8269236974854
G4VDH7	tr|G4VDH7|G4VDH7_SCHMA Putative ribosomal protein S11 OS=Schistosoma mansoni GN=Smp_032760 PE=3 SV=1	6	16.865	0.260721	0.583824	0.517912	1.43188	FALSE	22.02286868208	20.990795623213	22.0490263325316	21.8093196375646	20.7207278576556	20.9789077704354
G4VDI4	tr|G4VDI4|G4VDI4_SCHMA Thymidylate kinase OS=Schistosoma mansoni GN=Smp_032810 PE=3 SV=1	12	26.687	0.391079	0.407735	-0.165659	1.12168	FALSE	21.8830769817348	22.2199922194769	21.9992782706401	22.0946423866108	22.3710121442307	22.133670017847
G4VDI7	tr|G4VDI7|G4VDI7_SCHMA Putative lysophosphatidic acid phosphatase OS=Schistosoma mansoni GN=Smp_139900 PE=3 SV=1	7	27.477	0.648728	0.187938	0.106416	1.07655	FALSE	21.3504530830997	20.865309950381	21.3853258589565	21.329238763097	21.0280591294903	20.9245433821076
G4VDI8	tr|G4VDI8|G4VDI8_SCHMA Cdc50-related OS=Schistosoma mansoni GN=Smp_210240 PE=4 SV=1	3	20.328	0.167316	0.776462	-0.759255	1.69262	FALSE	19.6163188271214	21.0625026142184	21.4292759425856	21.5721342913625	21.2415699107617	21.572158429264
G4VDJ0	tr|G4VDJ0|G4VDJ0_SCHMA Cdc50-related OS=Schistosoma mansoni GN=Smp_210250 PE=4 SV=1	4	36.865	0.0844533	1.07338	0.389041	1.30952	FALSE	18.7984147524304	18.3329052838078	18.6358255518424	18.1874736121678	18.3095254807252	18.1030228238533
G4VDJ6	tr|G4VDJ6|G4VDJ6_SCHMA Putative adp-ribosylation factor, arf OS=Schistosoma mansoni GN=Smp_088650 PE=3 SV=1	8	20.748	0.286848	0.542348	-0.17935	1.13237	FALSE	22.0941056617505	22.1927249569068	21.9724385525926	22.2763209724808	22.2307819685548	22.290217616711
G4VDJ9	tr|G4VDJ9|G4VDJ9_SCHMA VPS13C protein, putative OS=Schistosoma mansoni GN=Smp_021170 PE=4 SV=1	5	398.25	0.559918	0.251876	-0.295952	1.22769	FALSE	13.8307837038181	12.9746390782422	14.845619639365	13.8966256853408	14.2728824249109	14.3693903303907
G4VDK2	tr|G4VDK2|G4VDK2_SCHMA 40S ribosomal protein S7 OS=Schistosoma mansoni GN=Smp_021140 PE=3 SV=1	5	23.084	0.436404	0.360111	0.204719	1.15246	FALSE	20.9558633565412	20.9236972148732	21.4135636735648	21.2628930896735	20.6903854559552	20.7256887763223
G4VDL3	tr|G4VDL3|G4VDL3_SCHMA Putative utp-glucose-1-phosphate uridylyltransferase 2 (Udp-glucose pyrophosphorylase 2) OS=Schistosoma mansoni GN=Smp_133600 PE=4 SV=1	15	52.728	0.0375511	1.42538	-0.435097	1.352	FALSE	23.0473592782601	22.773429694619	22.8967830494617	23.4133482696252	23.3732717734462	23.236243771682
G4VDM4	tr|G4VDM4|G4VDM4_SCHMA Serine/threonine kinase OS=Schistosoma mansoni GN=Smp_047900 PE=4 SV=1	3	23.599	0.163121	0.787489	0.299316	1.23056	FALSE	19.1189887849474	19.4639269160607	19.4091643188496	19.0468518111357	18.8446532203974	19.2026283064673
G4VDN2	tr|G4VDN2|G4VDN2_SCHMA Putative cytosolic purine 5-nucleotidase OS=Schistosoma mansoni GN=Smp_147840 PE=4 SV=1	22	62.265	0.00150069	2.82371	-1.26519	2.40359	TRUE	21.6346699214984	21.0477584596473	21.5127359991677	22.8703811633009	22.683599336381	22.4367563510812
G4VDP3	tr|G4VDP3|G4VDP3_SCHMA Putative myosin regulatory light chain 2 smooth muscle OS=Schistosoma mansoni GN=Smp_103000.1 PE=4 SV=1	2	8.6316	0.00793313	2.10056	-3.55685	11.7684	TRUE	17.7676862725349	14.5011210631332	14.4707619788912	18.9571754195199	19.1524840490655	19.3004455093856
G4VDP7	tr|G4VDP7|G4VDP7_SCHMA Glyoxalase I (Lactoylglutathione lyase) OS=Schistosoma mansoni GN=Smp_001410.1 PE=4 SV=1	11	28.227	0.30021	0.522575	0.225721	1.16936	FALSE	23.5789294303803	24.1155008733615	23.7609718137217	23.5913131467878	23.4891681613697	23.6977570765448
G4VDQ6	tr|G4VDQ6|G4VDQ6_SCHMA Uncharacterized protein OS=Schistosoma mansoni GN=Smp_170450 PE=3 SV=1	3	67.552	0.59365	0.22647	-0.233687	1.17584	FALSE	18.2898929273548	17.852595698023	17.0623308272603	18.2361824931781	17.3462054176955	18.3234931724098
G4VDR2	tr|G4VDR2|G4VDR2_SCHMA Putative ubiquitin-conjugating enzyme E2-25kD OS=Schistosoma mansoni GN=Smp_082050 PE=3 SV=1	4	24.845	0.486252	0.313138	-0.462177	1.37762	FALSE	20.1952626891931	20.1986934981745	18.1280527351761	20.1380499934248	20.3334348308204	19.4370554447745
G4VDR4	tr|G4VDR4|G4VDR4_SCHMA Family C56 non-peptidase homologue (C56 family) OS=Schistosoma mansoni GN=Smp_082030 PE=4 SV=1	11	19.091	0.829552	0.0811566	-0.0435585	1.03065	FALSE	25.8504603210562	25.5517156681829	25.5629083599936	25.7447078529933	25.8890609533614	25.4619911210548
G4VDR7	tr|G4VDR7|G4VDR7_SCHMA Putative dead box ATP-dependent RNA helicase OS=Schistosoma mansoni GN=Smp_166400 PE=3 SV=1	4	38.791	0.085196	1.06958	1.32757	2.5098	FALSE	18.1375878429968	15.7065317939953	17.8103987792958	15.7555982034479	15.8278677694611	16.0883298865714
G4VDS8;G4VDS7	tr|G4VDS8|G4VDS8_SCHMA Putative chromobox protein OS=Schistosoma mansoni GN=Smp_179650.2 PE=4 SV=1;tr|G4VDS7|G4VDS7_SCHMA Putative chromobox protein OS=Schistosoma mansoni GN=Smp_179650.1 PE=4 SV=1	10	27.269	0.000557879	3.25346	1.04021	2.05653	TRUE	22.0484827797824	22.1134087702396	22.229581902847	21.0457834828974	21.0295748771089	21.1954762944017
G4VDS9	tr|G4VDS9|G4VDS9_SCHMA Uncharacterized protein OS=Schistosoma mansoni GN=Smp_179660 PE=4 SV=1	10	103.41	0.0153212	1.81471	-0.885996	1.84804	FALSE	17.4247517682658	17.8600925031884	17.3064037068474	18.4208191504296	18.0471332484932	18.7812832056846
G4VDT0	tr|G4VDT0|G4VDT0_SCHMA Putative gyf domain OS=Schistosoma mansoni GN=Smp_093430 PE=4 SV=1	2	122.73	0.406031	0.391441	-0.182112	1.13454	FALSE	16.6980971541522	16.1011821309832	16.3329290411931	16.6045366158216	16.4945686263052	16.5794399244186
G4VDT5	tr|G4VDT5|G4VDT5_SCHMA Family C2 unassigned peptidase (C02 family) OS=Schistosoma mansoni GN=Smp_089460.1 PE=3 SV=1	1	87.676	0.0593387	1.22666	-0.575201	1.48988	FALSE	16.4947614895136	17.0450948206776	17.3234727560009	17.6073021947699	17.5079744373852	17.4736544231611
G4VDT6	tr|G4VDT6|G4VDT6_SCHMA Family C2 unassigned peptidase (C02 family) OS=Schistosoma mansoni GN=Smp_089460.2 PE=3 SV=1	46	88.361	0.658697	0.181314	-0.0853606	1.06095	FALSE	23.9020351394387	23.8045068210159	23.5277403775487	23.958990365391	23.6713877291912	23.8599860896985
G4VDT8	tr|G4VDT8|G4VDT8_SCHMA Uncharacterized protein OS=Schistosoma mansoni GN=Smp_170950 PE=4 SV=1	2	39.5	0.0121985	1.91369	-1.28108	2.43021	FALSE	14.2283307302282	14.5011210631332	15.4650698311136	16.3201999956559	15.843226892057	15.8743337137465
G4VDU1	tr|G4VDU1|G4VDU1_SCHMA Putative vinculin OS=Schistosoma mansoni GN=Smp_170990 PE=4 SV=1	5	172.71	0.186912	0.728362	-0.811355	1.75486	FALSE	15.6890720983027	14.4031052888332	15.183450826784	16.5269408475056	14.8659042468543	16.316848615621
G4VDV2	tr|G4VDV2|G4VDV2_SCHMA Prefoldin subunit 3 OS=Schistosoma mansoni GN=Smp_021800 PE=3 SV=1	6	21.491	0.806297	0.093505	0.0571512	1.04041	FALSE	21.1095202681273	20.6025286901802	20.5120163735935	20.5280594211789	20.855172180086	20.6693799819879
G4VDZ4	tr|G4VDZ4|G4VDZ4_SCHMA Putative 60s ribosomal protein L7a OS=Schistosoma mansoni GN=Smp_210300 PE=4 SV=1	2	82.82	0.658851	0.181213	0.43502	1.35193	FALSE	16.2839572129648	14.5011210631332	17.2720362007744	16.9695355337237	14.2319067644938	15.5506130390691
G4VE00	tr|G4VE00|G4VE00_SCHMA Uncharacterized protein OS=Schistosoma mansoni GN=Smp_208030 PE=4 SV=1	122	331.38	0.296647	0.52776	-0.224299	1.16821	FALSE	23.5669813321496	23.3445460896752	23.7332331240564	23.824996678991	23.5458760355817	23.9467835673797
G4VE01	tr|G4VE01|G4VE01_SCHMA Uncharacterized protein OS=Schistosoma mansoni GN=Smp_146950 PE=4 SV=1	104	301.89	0.406712	0.390713	-0.169744	1.12486	FALSE	23.8672467526331	23.6473599564913	24.0108222305649	24.1013026376984	23.7923909993762	24.1409685407009
G4VE02	tr|G4VE02|G4VE02_SCHMA Putative copii-coated vesicle membrane protein P24 OS=Schistosoma mansoni GN=Smp_046250 PE=3 SV=1	3	22.885	0.665193	0.177052	0.202568	1.15074	FALSE	20.0229379641432	18.8553296291821	20.3741117598349	19.5564381654295	19.1380888332389	19.9501491604194
G4VE06	tr|G4VE06|G4VE06_SCHMA Putative phosphatidylcholine transfer protein OS=Schistosoma mansoni GN=Smp_146970 PE=2 SV=1	2	18.063	0.412595	0.384476	-0.939238	1.91752	FALSE	18.1393272627604	18.2824977730167	14.4707619788912	18.580653782227	17.5185260101605	17.6111226044963
G4VE11	tr|G4VE11|G4VE11_SCHMA 2-methoxy-6-polyprenyl-1,4-benzoquinol methylase, mitochondrial OS=Schistosoma mansoni GN=Smp_021910 PE=3 SV=1	2	32.821	2.00795e-06	5.69725	-4.28398	19.4808	TRUE	14.2283307302282	14.5011210631332	14.4707619788912	18.7146184134169	19.0448930788003	18.2926436739658
G4VE12;G4VE13	tr|G4VE12|G4VE12_SCHMA Putative paramyosin OS=Schistosoma mansoni GN=Smp_021920.1 PE=4 SV=1;tr|G4VE13|G4VE13_SCHMA Putative paramyosin OS=Schistosoma mansoni GN=Smp_021920.3 PE=4 SV=1	3	84.176	0.808362	0.0923942	-0.113921	1.08217	FALSE	24.4651741487616	23.9765522205484	22.759629952923	23.7470008200602	23.7119710806577	24.0841478479719
G4VE14	tr|G4VE14|G4VE14_SCHMA Putative zinc finger protein OS=Schistosoma mansoni GN=Smp_134010.1 PE=4 SV=1	7	38.821	0.632263	0.199102	0.104503	1.07512	FALSE	20.669120099365	20.7411264754652	20.9937660436502	20.4014956285184	20.9215597740634	20.7674487133762
G4VE33	tr|G4VE33|G4VE33_SCHMA Putative ribose-phosphate pyrophosphokinase 1 OS=Schistosoma mansoni GN=Smp_022090 PE=3 SV=1	7	34.793	0.0294019	1.53162	-0.516347	1.43033	FALSE	20.4207609080698	20.6717862675396	20.2897781879582	21.1142180320527	20.9667044531071	20.8504430024786
G4VE62;B9P3Q8;G4VE61	tr|G4VE62|G4VE62_SCHMA Putative alpha-amylase OS=Schistosoma mansoni GN=Smp_037540.2 PE=4 SV=1;tr|B9P3Q8|B9P3Q8_SCHMA Permease 1 heavy chain OS=Schistosoma mansoni PE=2 SV=1;tr|G4VE61|G4VE61_SCHMA Putative alpha-amylase OS=Schistosoma mansoni GN=Smp_037540	13	71.586	0.905599	0.0430642	-0.025635	1.01793	FALSE	20.5100661061611	20.6371494591325	20.1437205762607	20.3583918632472	20.3390797265214	20.6703696787423
G4VE67	tr|G4VE67|G4VE67_SCHMA Putative rap1 and OS=Schistosoma mansoni GN=Smp_142450 PE=4 SV=1	4	20.774	0.397972	0.400148	-0.339463	1.26529	FALSE	21.6377948448787	21.2578856845677	20.2285184527959	21.3814733749665	21.3667690353077	21.3943446474593
G4VE73	tr|G4VE73|G4VE73_SCHMA Uncharacterized protein OS=Schistosoma mansoni GN=Smp_037640 PE=4 SV=1	4	48.679	0.0603005	1.21968	0.539253	1.45322	FALSE	19.1297343967715	19.1760408532133	19.3330035480575	18.3593315099007	18.5732324261582	19.0884568266405
G4VE80	tr|G4VE80|G4VE80_SCHMA Nicotinate phosphoribosyltransferase related pre-B cell enhancing factor OS=Schistosoma mansoni GN=Smp_017230 PE=4 SV=1	12	52.667	0.105008	0.978777	0.60018	1.51591	FALSE	20.2013976492838	20.6153805706459	20.8486356992545	19.411738447837	20.3760201105341	20.0771151934238
G4VE86;G4VE85	tr|G4VE86|G4VE86_SCHMA Uncharacterized protein OS=Schistosoma mansoni GN=Smp_017290.4 PE=4 SV=1;tr|G4VE85|G4VE85_SCHMA Uncharacterized protein OS=Schistosoma mansoni GN=Smp_017290.3 PE=4 SV=1	2	20.774	0.820536	0.0859026	0.107764	1.07756	FALSE	17.8199150552828	18.8893404792972	17.231743918143	18.1962698355963	17.934689471442	17.4867479339942
G4VE88	tr|G4VE88|G4VE88_SCHMA Jab1/MPN domain metalloenzyme (M67 family) OS=Schistosoma mansoni GN=Smp_131660 PE=4 SV=1	3	39.06	0.583958	0.233618	-0.259924	1.19742	FALSE	16.6308546901128	17.2484601558467	17.6105398518639	18.2381120194259	17.2795303757234	16.7519851403362
G4VE92;Q94757	tr|G4VE92|G4VE92_SCHMA Putative t-complex protein 1 subunit alpha (TCP-1-alpha) (CCT-alpha) OS=Schistosoma mansoni GN=Smp_017360 PE=3 SV=1;sp|Q94757|TCPA_SCHMA T-complex protein 1 subunit alpha OS=Schistosoma mansoni GN=TCP-1A PE=2 SV=1	26	60.081	0.744512	0.128129	0.0514369	1.0363	FALSE	23.5721986125786	23.4658155086037	23.6557695801352	23.4956245685423	23.5330396598056	23.5108088629617
G4VE93	tr|G4VE93|G4VE93_SCHMA MAGUK homolog OS=Schistosoma mansoni GN=Smp_131690 PE=3 SV=1	3	94.796	0.184086	0.73498	-0.755187	1.68785	FALSE	15.0777297484825	15.4984948788347	13.9976958449143	16.3817274112839	15.2062152941349	15.2515384281766
G4VE95	tr|G4VE95|G4VE95_SCHMA Protein kinase C OS=Schistosoma mansoni GN=Smp_131700 PE=3 SV=1	3	94.969	0.0237384	1.62455	0.711353	1.63734	FALSE	14.8150453341991	15.2338328482809	15.5161647074115	14.6259766897051	14.2728824249109	14.5321256808221
G4VEE0	tr|G4VEE0|G4VEE0_SCHMA Putative kunitz-type protease inhibitor OS=Schistosoma mansoni GN=Smp_147730 PE=4 SV=1	3	16.463	0.000852397	3.06936	-2.45924	5.49926	TRUE	17.1537245716785	18.299996294651	18.3960969224225	19.9679225470286	20.62936888135	20.6302424720417
G4VEE4	tr|G4VEE4|G4VEE4_SCHMA Putative ef hand containing protein OS=Schistosoma mansoni GN=Smp_147680 PE=4 SV=1	14	38.191	0.630361	0.200411	0.103163	1.07413	FALSE	21.9737870565738	22.0143080691925	21.6515283440218	21.5234913619753	21.9793086777876	21.8273357466469
G4VEF4;G4VEF3	tr|G4VEF4|G4VEF4_SCHMA Putative dead box ATP-dependent RNA helicase OS=Schistosoma mansoni GN=Smp_034190.1 PE=3 SV=1;tr|G4VEF3|G4VEF3_SCHMA Putative dead box ATP-dependent RNA helicase OS=Schistosoma mansoni GN=Smp_034190.2 PE=3 SV=1	6	46.005	0.0714585	1.14595	0.497265	1.41153	FALSE	19.6550810225244	19.7509474462762	19.6273448763651	19.4122486848152	18.7565388179388	19.3727921844796
G4VEG1	tr|G4VEG1|G4VEG1_SCHMA Endothelial differentiation-related factor 1 OS=Schistosoma mansoni GN=Smp_140680.1 PE=4 SV=1	1	15.006	0.059348	1.22659	0.419577	1.33754	FALSE	19.9073441200034	19.9280841805721	19.6552110094213	19.4611497828251	19.555537565072	19.2152195049993
G4VEI2	tr|G4VEI2|G4VEI2_SCHMA Acetyl-CoA C-acetyltransferase (Fragment) OS=Schistosoma mansoni GN=Smp_197330 PE=4 SV=1	9	103.1	0.255876	0.591971	-0.305074	1.23548	FALSE	19.9483246680216	19.5099962917955	20.3120371149295	20.3344976815844	20.2253288405757	20.1257546808697
G4VEI7	tr|G4VEI7|G4VEI7_SCHMA Putative suppressor of potassium transport defect 3 (Skd3 protein) OS=Schistosoma mansoni GN=Smp_145990 PE=4 SV=1	5	56.993	0.160695	0.793997	-0.698757	1.62311	FALSE	17.0069988835751	17.8406516375386	16.4486082779134	17.2743471917064	17.8011760305932	18.3170075194452
G4VEJ9	tr|G4VEJ9|G4VEJ9_SCHMA Putative adamts (A disintegrin and metalloprotease) OS=Schistosoma mansoni GN=Smp_145890 PE=4 SV=1	2	69.276	0.617449	0.209399	-0.135285	1.09831	FALSE	16.8723505751418	16.3889253694641	16.1419939905051	16.3088452916476	16.7785284637889	16.7217524360909
G4VEK4	tr|G4VEK4|G4VEK4_SCHMA Dihydropyrimidinase related protein-1 (M38 family) OS=Schistosoma mansoni GN=Smp_078780 PE=4 SV=1	13	64.716	0.138397	0.858873	-0.272946	1.20827	FALSE	21.173769743473	21.1915715505268	21.0090017949406	21.466994023761	21.2724564489778	21.4537311303604
G4VEK7	tr|G4VEK7|G4VEK7_SCHMA Uncharacterized protein OS=Schistosoma mansoni GN=Smp_129520 PE=4 SV=1	11	123.89	0.0327742	1.48447	-1.41923	2.67443	FALSE	17.9931467424955	17.5526648854426	16.124279913433	18.9895044264992	18.2553113688288	18.6829641849423
G4VEL6	tr|G4VEL6|G4VEL6_SCHMA Farnesyl pyrophosphate synthase OS=Schistosoma mansoni GN=Smp_070710 PE=3 SV=1	9	44.864	0.424668	0.371951	-0.266196	1.20263	FALSE	18.9325971175786	19.7606631266191	20.0371422753051	19.8803729349581	19.9217727232199	19.7268444824226
G4VEM1	tr|G4VEM1|G4VEM1_SCHMA UDP-glucose 4-epimerase OS=Schistosoma mansoni GN=Smp_070780 PE=3 SV=1	12	39.02	0.000227288	3.64342	-1.60878	3.04993	TRUE	22.4077138379093	22.9133927511195	22.9403410257259	24.3799498472784	24.4258295605448	24.281997109906
G4VEN0;G4VEM9	tr|G4VEN0|G4VEN0_SCHMA Putative heat shock protein 70 (Hsp70) OS=Schistosoma mansoni GN=Smp_106130.2 PE=3 SV=1;tr|G4VEM9|G4VEM9_SCHMA Putative heat shock protein 70 (Hsp70) OS=Schistosoma mansoni GN=Smp_106130.1 PE=3 SV=1	32	71.382	0.00341289	2.46688	-0.77825	1.71505	FALSE	23.6682344670223	23.8377192312907	23.7366472671259	24.4289545455779	24.4431172338414	24.7052781091612
G4VEN3	tr|G4VEN3|G4VEN3_SCHMA Uncharacterized protein OS=Schistosoma mansoni GN=Smp_181460 PE=4 SV=1	3	50.808	0.0347856	1.4586	1.15906	2.23312	FALSE	18.0800969379734	17.1900563039018	16.9542311339424	16.9491457188984	15.8468439017	15.9512105338461
G4VEN7	tr|G4VEN7|G4VEN7_SCHMA Mitochondrial carrier protein-related OS=Schistosoma mansoni GN=Smp_106060 PE=3 SV=1	7	52.291	0.95945	0.0179776	-0.0346913	1.02434	FALSE	17.9954646886679	17.0438170816508	18.8590697727457	18.9564409298655	16.9573585467918	18.0886260626935
G4VEP7	tr|G4VEP7|G4VEP7_SCHMA Putative 26s proteasome non-ATPase regulatory subunit OS=Schistosoma mansoni GN=Smp_181380 PE=4 SV=1	5	69.962	0.183346	0.736728	0.424279	1.3419	FALSE	17.8752392235996	17.6058444099464	17.5605886545477	17.5085907083831	17.5634752589969	16.696768650102
G4VEP8;G4VEP9	tr|G4VEP8|G4VEP8_SCHMA Uncharacterized protein OS=Schistosoma mansoni GN=Smp_105970.1 PE=4 SV=1;tr|G4VEP9|G4VEP9_SCHMA Uncharacterized protein OS=Schistosoma mansoni GN=Smp_105970.2 PE=4 SV=1	9	57.256	0.813829	0.0894666	0.0418591	1.02944	FALSE	21.3894516315166	21.2687273915454	21.1330625165887	21.1197737881133	21.3872698552326	21.1586204755755
G4VES1;G4VES2;G4VES3	tr|G4VES1|G4VES1_SCHMA Dihydropyrimidinase related protein-2 (M38 family) OS=Schistosoma mansoni GN=Smp_085110.2 PE=4 SV=1;tr|G4VES2|G4VES2_SCHMA Dihydropyrimidinase (M38 family) OS=Schistosoma mansoni GN=Smp_085110.3 PE=4 SV=1;tr|G4VES3|G4VES3_SCHMA Dihyd	26	63.859	0.727776	0.138002	-0.0537639	1.03797	FALSE	23.1525534886855	23.2108238881036	23.2403752411815	23.2777391644325	23.1928171739792	23.2944880540892
G4VES6	tr|G4VES6|G4VES6_SCHMA Putative chaperone binding protein OS=Schistosoma mansoni GN=Smp_010160 PE=4 SV=1	9	23.03	0.428853	0.367692	0.161183	1.1182	FALSE	21.2198893137082	21.3490954199234	21.2784581520971	21.1948693009802	21.3319934435849	20.8370323968915
G4VET6	tr|G4VET6|G4VET6_SCHMA Snf7-related OS=Schistosoma mansoni GN=Smp_010090 PE=3 SV=1	1	19.528	0.166834	0.777716	-0.546721	1.46076	FALSE	18.769173910912	19.9538743956778	19.857727151418	19.9674886407301	20.0377849049613	20.2156650891886
G4VEW9	tr|G4VEW9|G4VEW9_SCHMA Putative shoc2 OS=Schistosoma mansoni GN=Smp_129120 PE=4 SV=1	4	60.12	0.000683303	3.16539	-1.9014	3.73575	TRUE	16.5904063691775	15.9634648369583	16.065002298429	18.0734190131109	17.6920842923941	18.5575683099823
G4VEX2	tr|G4VEX2|G4VEX2_SCHMA Eukaryotic translation initiation factor 3 subunit J OS=Schistosoma mansoni GN=Smp_012980 PE=3 SV=1	8	25.709	0.539113	0.26832	-0.136113	1.09894	FALSE	21.2471305522949	21.4885784450609	21.5749435537628	21.2944766398138	21.8407919859286	21.5837237093664
G4VEY4	tr|G4VEY4|G4VEY4_SCHMA Putative zinc binding dehydrogenase OS=Schistosoma mansoni GN=Smp_026310 PE=4 SV=1	13	39.407	3.76418e-05	4.42433	-1.94488	3.85006	TRUE	20.8791021915695	20.7048027283428	21.1315239271521	22.9392666240116	22.8289945106077	22.7818131644819
G4VEZ3;G4VEZ2;G4VEZ1	tr|G4VEZ3|G4VEZ3_SCHMA Peptide alpha-n-acetyltransferase-related OS=Schistosoma mansoni GN=Smp_026250.1 PE=4 SV=1;tr|G4VEZ2|G4VEZ2_SCHMA Peptide alpha-n-acetyltransferase-related OS=Schistosoma mansoni GN=Smp_026250.2 PE=4 SV=1;tr|G4VEZ1|G4VEZ1_SCHMA Pepti	1	77.927	0.0911993	1.04001	-0.497733	1.41199	FALSE	14.2283307302282	14.5011210631332	14.4707619788912	15.3284847631746	14.5375044017755	14.8274232127104
G4VEZ6	tr|G4VEZ6|G4VEZ6_SCHMA Uncharacterized protein OS=Schistosoma mansoni GN=Smp_026230 PE=4 SV=1	3	16.676	0.0242446	1.61538	-0.774445	1.71053	FALSE	21.9001504950938	21.8027138324429	21.1201005718499	22.2506235247853	22.5657708616385	22.3299050612829
G4VEZ9	tr|G4VEZ9|G4VEZ9_SCHMA Uncharacterized protein OS=Schistosoma mansoni GN=Smp_092810.1 PE=4 SV=1	2	31.277	0.0654456	1.18412	0.720163	1.64737	FALSE	19.3012255135752	19.2189311801992	18.9505330797065	18.7593810439812	17.7704792333703	18.7803405757648
G4VF06;G4VF07	tr|G4VF06|G4VF06_SCHMA Putative receptor protein tyrosine phosphatase n,(Ia2) OS=Schistosoma mansoni GN=Smp_150220.1 PE=4 SV=1;tr|G4VF07|G4VF07_SCHMA Putative receptor protein tyrosine phosphatase n,(Ia2) OS=Schistosoma mansoni GN=Smp_150220.2 PE=4 SV=1	10	82.016	0.588383	0.23034	-0.14877	1.10862	FALSE	19.0219677123617	18.6721791217477	18.1765024577809	18.7956767995557	18.5858296338346	18.9354520134638
G4VF17;G4VF19;G4VF18	tr|G4VF17|G4VF17_SCHMA Sporulation protein rmd5-related (Glucose-induced degradation protein 2) OS=Schistosoma mansoni GN=Smp_084400.4 PE=4 SV=1;tr|G4VF19|G4VF19_SCHMA Sporulation protein rmd5-related (Glucose-induced degradation protein 2) OS=Schistosoma	3	52.985	0.220677	0.656243	-0.512071	1.4261	FALSE	15.9712315041836	16.7090006017163	15.9387698433787	16.0671793784501	16.873533584887	17.2145024067556
G4VF21	tr|G4VF21|G4VF21_SCHMA Trans-golgi protein gmx33-related OS=Schistosoma mansoni GN=Smp_007500.1 PE=4 SV=1	2	32.081	0.319068	0.496117	0.411986	1.33052	FALSE	19.5968100317421	19.2784021714059	18.9321144712112	18.0893637475161	19.2477663716954	19.2342373078427
G4VF23;G4VF24;G4VF25	tr|G4VF23|G4VF23_SCHMA Ubiquitin carboxyl-terminal hydrolase OS=Schistosoma mansoni GN=Smp_168800.4 PE=3 SV=1;tr|G4VF24|G4VF24_SCHMA Ubiquitin carboxyl-terminal hydrolase OS=Schistosoma mansoni GN=Smp_168800.1 PE=3 SV=1;tr|G4VF25|G4VF25_SCHMA Ubiquitin car	2	17.8	0.0307896	1.5116	0.50429	1.41842	FALSE	19.3163643012323	19.4094837251267	19.5244461507773	18.9626373707524	19.0852258261867	18.6895621855061
G4VF34	tr|G4VF34|G4VF34_SCHMA Abl-binding protein-related OS=Schistosoma mansoni GN=Smp_085740 PE=4 SV=1	2	61.306	0.381652	0.418332	-0.223245	1.16736	FALSE	19.1095985598727	18.4010011369322	18.5872647629271	18.8038468643311	18.8682691810328	19.0954845458439
G4VF49	tr|G4VF49|G4VF49_SCHMA Lysosomal Pro-Xaa carboxypeptidase (S28 family) OS=Schistosoma mansoni GN=Smp_002600.1 PE=4 SV=1	3	56.326	0.0426858	1.36972	0.502165	1.41634	FALSE	20.1221225742927	20.4871689895641	20.5418350661642	19.7417072639672	19.8388762804571	20.0640493484217
G4VF52	tr|G4VF52|G4VF52_SCHMA Putative vacuolar protein sorting vps16 OS=Schistosoma mansoni GN=Smp_123510 PE=4 SV=1	3	105.34	0.234328	0.630176	0.277573	1.21215	FALSE	14.7406970078913	14.8187206432516	14.640634313647	14.7835847414928	14.4209200195058	14.1628280091752
G4VF54;G4VF55	tr|G4VF54|G4VF54_SCHMA RNA-binding protein 8A OS=Schistosoma mansoni GN=Smp_002550.1 PE=3 SV=1;tr|G4VF55|G4VF55_SCHMA RNA-binding protein 8A OS=Schistosoma mansoni GN=Smp_002550.2 PE=3 SV=1	8	20.158	0.347873	0.458579	0.221764	1.16616	FALSE	21.3147353131512	21.0550701011311	20.6734386639823	20.6518826580689	20.9000324837139	20.8260358070682
G4VF56	tr|G4VF56|G4VF56_SCHMA Putative nicotinamide mononucleotide adenylyltransferase OS=Schistosoma mansoni GN=Smp_123490 PE=4 SV=1	7	32.845	0.0431058	1.36546	0.609086	1.52529	FALSE	18.4487154181185	19.1167850623434	18.9182454152551	18.4226689708765	18.2308163439454	18.0030023827879
G4VF59	tr|G4VF59|G4VF59_SCHMA Pyruvate dehydrogenase (Lipoamide) OS=Schistosoma mansoni GN=Smp_002510 PE=4 SV=1	10	38.71	0.0404431	1.39316	-0.481969	1.39665	FALSE	23.1051749454642	22.9263431288601	23.2636172143326	23.4041593526424	23.5722289253796	23.7646545701813
G4VF64	tr|G4VF64|G4VF64_SCHMA Putative fad oxidoreductase OS=Schistosoma mansoni GN=Smp_123440.1 PE=4 SV=1	8	44.181	0.0163261	1.78712	0.614828	1.53138	FALSE	19.9562552216802	20.3461829101596	20.065164896365	19.4130137020886	19.6790924501278	19.4310117055926
G4VF73	tr|G4VF73|G4VF73_SCHMA Uncharacterized protein OS=Schistosoma mansoni GN=Smp_156370 PE=4 SV=1	1	78.908	0.00176158	2.7541	-0.856815	1.81104	FALSE	15.8000392451911	15.719586200894	15.5251269971265	16.5845750446992	16.4825930578537	16.5480307587412
G4VF74	tr|G4VF74|G4VF74_SCHMA Pyruvate kinase OS=Schistosoma mansoni GN=Smp_156360 PE=3 SV=1	6	127.12	0.0786742	1.10417	-1.10006	2.14363	FALSE	15.3463595254097	17.2450173655391	15.7207200578555	17.0495109760422	17.5798326849792	16.9829307236307
G4VF75	tr|G4VF75|G4VF75_SCHMA Putative chaperonin containing t-complex protein 1,epsilon subunit, tcpe OS=Schistosoma mansoni GN=Smp_063420 PE=3 SV=1	18	60.244	0.237816	0.623759	-0.195831	1.14538	FALSE	23.1730519303869	23.1295908199235	23.2898531576907	23.4160538209637	23.363506641803	23.4004285996066
G4VF83	tr|G4VF83|G4VF83_SCHMA Uncharacterized protein OS=Schistosoma mansoni GN=Smp_063330 PE=4 SV=1	1	21.177	0.00078208	3.10675	4.10942	17.2608	TRUE	19.0861306029659	19.7438044055561	18.9222746862548	16.6189308102802	14.2728824249109	14.5321256808221
G4VF95	tr|G4VF95|G4VF95_SCHMA Putative leucine-rich repeat-containing protein OS=Schistosoma mansoni GN=Smp_063230 PE=4 SV=1	9	64.704	0.823649	0.084258	0.0944787	1.06768	FALSE	19.6167962974805	19.4278443587564	20.6394825754505	20.2587852659669	19.8233063903169	19.3185955958038
G4VFA5	tr|G4VFA5|G4VFA5_SCHMA Putative programmed cell death 6-interacting protein OS=Schistosoma mansoni GN=Smp_087620 PE=4 SV=1	25	93.194	0.724385	0.14003	0.0850699	1.06074	FALSE	21.5053628186309	21.1633153509616	20.7558139854563	21.1195394702566	20.9874698933903	21.0622731273176
G4VFA8	tr|G4VFA8|G4VFA8_SCHMA Pcd6 interacting protein-related OS=Schistosoma mansoni GN=Smp_087580 PE=4 SV=1	8	81.298	0.792567	0.100964	0.0672266	1.0477	FALSE	20.0556796357033	19.9441307428561	19.7548584144173	19.4631210146138	19.8456262695682	20.2442418375357
G4VFB4	tr|G4VFB4|G4VFB4_SCHMA Uncharacterized protein OS=Schistosoma mansoni GN=Smp_079710 PE=4 SV=1	2	10.085	0.307324	0.512404	-0.328087	1.25535	FALSE	22.2425565045234	21.6841920851518	21.3397629813953	22.1437645590435	22.345417173918	21.7615896755934
G4VFB9;G4VFC0	tr|G4VFB9|G4VFB9_SCHMA Protein kinase OS=Schistosoma mansoni GN=Smp_079760.1 PE=4 SV=1;tr|G4VFC0|G4VFC0_SCHMA Protein kinase OS=Schistosoma mansoni GN=Smp_079760.2 PE=4 SV=1	11	56.051	0.540315	0.267353	-0.227136	1.17051	FALSE	21.0777911098465	21.8879170010949	21.4082695762695	21.4670247203798	22.2993394862287	21.28902146654
G4VFC2;P38658;G4VFC1	tr|G4VFC2|G4VFC2_SCHMA Protein disulfide-isomerase OS=Schistosoma mansoni GN=Smp_079770.1 PE=3 SV=1;sp|P38658|ERP60_SCHMA Probable protein disulfide-isomerase ER-60 OS=Schistosoma mansoni PE=3 SV=1;tr|G4VFC1|G4VFC1_SCHMA Uncharacterized protein OS=Schistos	25	54.359	0.811555	0.0906819	0.0537188	1.03794	FALSE	24.381598029523	24.7072891223222	24.5779060307215	24.1647535356677	24.6076818771361	24.7332012842981
G4VFC7	tr|G4VFC7|G4VFC7_SCHMA Uroporphyrinogen-III synthase OS=Schistosoma mansoni GN=Smp_079840 PE=4 SV=1	7	27.361	0.227866	0.64232	-0.232641	1.17498	FALSE	21.2810102977913	21.4726421188389	21.1908592923742	21.4275040302459	21.7104105666701	21.5045200149752
G4VFD1	tr|G4VFD1|G4VFD1_SCHMA UDP-glucose 6-dehydrogenase OS=Schistosoma mansoni GN=Smp_084830 PE=3 SV=1	2	54.324	0.0198561	1.70211	1.46624	2.763	FALSE	15.1364919553568	16.529919426155	16.4662421392977	14.2945693545802	14.2728824249109	15.1664882883215
G4VFE0	tr|G4VFE0|G4VFE0_SCHMA Putative collagen alpha-1(V) chain OS=Schistosoma mansoni GN=Smp_164590 PE=4 SV=1	5	151.98	0.178333	0.748769	0.710613	1.6365	FALSE	18.2202035657897	19.3949007259644	18.2615055332822	18.3199552844279	17.1512495591353	18.2735666812136
G4VFE1	tr|G4VFE1|G4VFE1_SCHMA Uncharacterized protein OS=Schistosoma mansoni GN=Smp_197370 PE=4 SV=1	2	125.74	0.698694	0.155713	-0.104162	1.07487	FALSE	16.9107178646924	17.2006440942242	16.6709687710298	17.4509053999187	16.839672921884	16.8042388434622
G4VFE2	tr|G4VFE2|G4VFE2_SCHMA Groucho-related OS=Schistosoma mansoni GN=Smp_165280 PE=4 SV=1	2	94.905	0.91308	0.0394912	0.0455287	1.03206	FALSE	15.0665021595664	14.8136915314887	13.9096160039975	15.1341333340332	14.2728824249109	14.2462078950266
G4VFE8;G4VCW3;G4VCW1;G4V9N3;G4V8L9	tr|G4VFE8|G4VFE8_SCHMA Histone H2A OS=Schistosoma mansoni GN=Smp_002930 PE=3 SV=1;tr|G4VCW3|G4VCW3_SCHMA Histone H2A OS=Schistosoma mansoni GN=Smp_089870 PE=3 SV=1;tr|G4VCW1|G4VCW1_SCHMA Histone H2A OS=Schistosoma mansoni GN=Smp_089840 PE=3 SV=1;tr|G4V9N3|	1	13.441	0.117558	0.929749	2.73862	6.67431	FALSE	20.6616638357098	20.1454816919881	21.0041116697143	19.3139605093656	14.2728824249109	20.0085584547855
G4VFF1;G4VFF2	tr|G4VFF1|G4VFF1_SCHMA Putative gtp-binding protein rit OS=Schistosoma mansoni GN=Smp_084940.1 PE=4 SV=1;tr|G4VFF2|G4VFF2_SCHMA Putative gtp-binding protein rit OS=Schistosoma mansoni GN=Smp_084940.3 PE=4 SV=1	4	18.09	0.644198	0.190981	-0.0985177	1.07067	FALSE	21.233484422411	20.9564061706071	20.7636949816561	20.880879928093	21.1104553514734	21.2578034550675
G4VFF7	tr|G4VFF7|G4VFF7_SCHMA Putative translation initiation factor EIF-2b alpha subunit OS=Schistosoma mansoni GN=Smp_084900 PE=3 SV=1	2	37.007	0.0297365	1.52671	-1.57294	2.9751	FALSE	16.3665920350612	16.3258366795843	14.4707619788912	17.3559140865913	16.9311961249769	17.5948917438666
G4VFG0	tr|G4VFG0|G4VFG0_SCHMA Uncharacterized protein OS=Schistosoma mansoni GN=Smp_084860 PE=4 SV=1	1	37.772	0.000144706	3.83951	-1.89315	3.71446	TRUE	14.2283307302282	14.5011210631332	14.4707619788912	16.4249463115876	15.9219146718638	16.5328124460215
G4VFG2	tr|G4VFG2|G4VFG2_SCHMA Uncharacterized protein OS=Schistosoma mansoni GN=Smp_168170 PE=4 SV=1	5	37.683	0.451947	0.344913	-0.165241	1.12135	FALSE	19.0800170287166	19.3753007488994	19.6390683271424	19.434019895213	19.4696280620618	19.6864626469139
G4VFG4	tr|G4VFG4|G4VFG4_SCHMA Uncharacterized protein OS=Schistosoma mansoni GN=Smp_138210 PE=3 SV=1	4	44.526	0.0461631	1.3357	1.14979	2.21882	FALSE	18.9175908423219	19.2816579020759	18.6896216672315	18.1010890357804	18.5055896605201	16.8328079956589
G4VFH9	tr|G4VFH9|G4VFH9_SCHMA Uncharacterized protein OS=Schistosoma mansoni GN=Smp_138290 PE=4 SV=1	1	62.756	0.00181707	2.74063	1.73334	3.32496	TRUE	16.2618657261366	15.4479221044832	16.6304855084226	14.335259308558	14.2728824249109	14.5321256808221
G4VFI2	tr|G4VFI2|G4VFI2_SCHMA Putative 4.1 G protein OS=Schistosoma mansoni GN=Smp_029800 PE=4 SV=1	3	54.147	0.205586	0.687007	0.625624	1.54288	FALSE	17.3145994810823	16.1063814795545	17.8182041817846	16.5275061299686	16.4431335528498	16.3916724182232
G4VFI4	tr|G4VFI4|G4VFI4_SCHMA Putative 60s acidic ribosomal protein P2 OS=Schistosoma mansoni GN=Smp_029820 PE=3 SV=1	7	12.067	0.160045	0.795758	-0.50473	1.41886	FALSE	21.7328115391418	22.8935138422272	22.3165480743346	22.791191906148	22.95379824811	22.7120737517074
G4VFI8	tr|G4VFI8|G4VFI8_SCHMA Putative septin OS=Schistosoma mansoni GN=Smp_029890 PE=1 SV=1	8	48.077	0.459267	0.337935	-0.14219	1.10358	FALSE	20.3251112133917	20.4129024353542	19.9956793349821	20.3121161983214	20.4173843208914	20.4307614187553
G4VFJ4	tr|G4VFJ4|G4VFJ4_SCHMA Uncharacterized protein OS=Schistosoma mansoni GN=Smp_138360 PE=4 SV=1	1	8.5674	3.09653e-07	6.50912	5.3226	40.0187	TRUE	19.5556424105409	20.1220920487297	19.7210616993397	14.6259766897051	14.2728824249109	14.5321256808221
G4VFL2	tr|G4VFL2|G4VFL2_SCHMA Uncharacterized protein OS=Schistosoma mansoni GN=Smp_138400 PE=4 SV=1	2	337.98	0.598441	0.222979	0.190334	1.14103	FALSE	17.0054289082494	16.9792450803547	15.922126113081	16.2228066852801	16.4361221566326	16.6768706345974
G4VFM3	tr|G4VFM3|G4VFM3_SCHMA Putative homer OS=Schistosoma mansoni GN=Smp_030150 PE=4 SV=1	4	42.828	0.05071	1.29491	0.570859	1.48541	FALSE	19.5393638902749	19.0659213431123	19.1679393630041	18.3445440554727	18.9173368952505	18.7987668479826
G4VFM6	tr|G4VFM6|G4VFM6_SCHMA Ubiquitin-related modifier 1 homolog OS=Schistosoma mansoni GN=Smp_030180 PE=3 SV=1	2	10.858	0.774594	0.110926	0.19878	1.14773	FALSE	18.7647395295999	18.0377323191898	18.200283683737	18.9519208426124	18.8393723541542	16.615122577
G4VFM9	tr|G4VFM9|G4VFM9_SCHMA Putative phosphoglycolate/pyridoxal phosphate phosphatase OS=Schistosoma mansoni GN=Smp_030220 PE=3 SV=1	5	31.914	0.527952	0.277406	0.195994	1.14551	FALSE	21.9555367209319	21.7330726404265	21.1432559294837	21.6379078100793	21.5824571729872	21.0235180170185
G4VFN5	tr|G4VFN5|G4VFN5_SCHMA Putative prefoldin subunit 2 OS=Schistosoma mansoni GN=Smp_030290 PE=4 SV=1	6	16.261	0.0346778	1.45995	0.537903	1.45186	FALSE	21.0437786687308	20.8567856101719	21.0376423800609	20.1351165871194	20.6284993688834	20.5608809388642
G4VFN7;G4VFN9;Q9NHY5	tr|G4VFN7|G4VFN7_SCHMA Putative endoplasmin OS=Schistosoma mansoni GN=Smp_030300.4 PE=3 SV=1;tr|G4VFN9|G4VFN9_SCHMA Putative endoplasmin OS=Schistosoma mansoni GN=Smp_030300.3 PE=3 SV=1;tr|Q9NHY5|Q9NHY5_SCHMA Endoplasmin OS=Schistosoma mansoni PE=2 SV=1	49	239.52	0.0682089	1.16616	-0.485138	1.39972	FALSE	22.9483502029959	23.0115532953267	22.4082419519281	23.2542744539119	23.1782593765683	23.3910250285318
G4VFP3;G4VFP2	tr|G4VFP3|G4VFP3_SCHMA Putative peptidyl-tRNA hydrolase OS=Schistosoma mansoni GN=Smp_030330.1 PE=4 SV=1;tr|G4VFP2|G4VFP2_SCHMA Putative peptidyl-tRNA hydrolase OS=Schistosoma mansoni GN=Smp_030330.2 PE=4 SV=1	4	17.092	0.0414966	1.38199	-1.24072	2.36317	FALSE	18.3661027726523	20.2482105522288	19.1972684323724	20.3565372437757	20.4091045533899	20.7681092577955
G4VFP9	tr|G4VFP9|G4VFP9_SCHMA Putative glycyl-tRNA synthetase OS=Schistosoma mansoni GN=Smp_040800 PE=4 SV=1	35	148.86	0.00382971	2.41683	-1.11808	2.17058	TRUE	20.835035737574	21.0553079014736	20.2513656371822	21.8135748076824	21.786166607719	21.8962106305026
G4VFQ0;Q26551	tr|G4VFQ0|G4VFQ0_SCHMA Peptidyl-prolyl cis-trans isomerase OS=Schistosoma mansoni GN=Smp_040790 PE=3 SV=1;sp|Q26551|PPIB_SCHMA Peptidyl-prolyl cis-trans isomerase B OS=Schistosoma mansoni GN=CYP PE=2 SV=1	11	23.296	0.122996	0.910107	-0.373847	1.2958	FALSE	22.7073006503831	23.0107564914857	22.5364108725597	23.298846431255	22.890453400232	23.1867084802846
G4VFQ2	tr|G4VFQ2|G4VFQ2_SCHMA Putative methionine-tRNA synthetase OS=Schistosoma mansoni GN=Smp_040770 PE=3 SV=1	13	67.687	0.116077	0.935255	-0.746983	1.67828	FALSE	19.7109175084654	18.6596378406667	19.4599617352277	20.4808635545841	19.3574162737023	20.2331851882316
G4VFS5	tr|G4VFS5|G4VFS5_SCHMA Putative nucleosome assembly protein OS=Schistosoma mansoni GN=Smp_023530 PE=3 SV=1	7	44.667	0.205377	0.687449	-0.301339	1.23229	FALSE	20.9516477098129	21.5666674577199	21.2244450761716	21.5259687504744	21.4418432871674	21.6789655624933
G4VFT3	tr|G4VFT3|G4VFT3_SCHMA Putative 4.1 G protein OS=Schistosoma mansoni GN=Smp_023620 PE=4 SV=1	6	76.634	0.916829	0.0377115	0.0386331	1.02714	FALSE	18.3347434030044	17.3331145064955	18.4915528586296	18.0637409130937	18.2642508912318	17.7155195376759
G4VFV4	tr|G4VFV4|G4VFV4_SCHMA Putative rap1 and OS=Schistosoma mansoni GN=Smp_071250 PE=4 SV=1	8	20.699	0.42387	0.372767	-0.180194	1.13304	FALSE	24.039795469498	23.9648908317671	23.44559977928	23.9898163942895	23.9754329643579	24.0256188148894
G4VFV7	tr|G4VFV7|G4VFV7_SCHMA Putative tpr OS=Schistosoma mansoni GN=Smp_160850 PE=4 SV=1	5	270.7	0.524454	0.280293	-0.257957	1.19578	FALSE	15.373215670748	14.8895112023363	14.2400915682494	15.6557143821298	14.8076557456307	14.8133197923727
G4VFX0;Q15ER8	tr|G4VFX0|G4VFX0_SCHMA Putative tropinone reductase OS=Schistosoma mansoni GN=Smp_042680 PE=4 SV=1;tr|Q15ER8|Q15ER8_SCHMA U2 snRNP splicing factor small subunit-like protein OS=Schistosoma mansoni PE=2 SV=1	8	29.407	0.0135867	1.86689	0.612126	1.52851	FALSE	22.6850348875842	22.4329595996493	22.5753372621168	22.0028119144514	22.10133422483	21.7528063195703
G4VFX6;G4VFX7	tr|G4VFX6|G4VFX6_SCHMA Putative histidyl-tRNA synthetase OS=Schistosoma mansoni GN=Smp_023360.2 PE=4 SV=1;tr|G4VFX7|G4VFX7_SCHMA Putative histidyl-tRNA synthetase OS=Schistosoma mansoni GN=Smp_023360.1 PE=4 SV=1	14	59.929	0.00346851	2.45986	-1.0108	2.01503	TRUE	18.9006181165163	19.5137621264063	19.467447433838	20.3216538118332	20.3316195154041	20.2609511375034
G4VFY6	tr|G4VFY6|G4VFY6_SCHMA Calcium-transporting ATPase OS=Schistosoma mansoni GN=Smp_136710.2 PE=3 SV=1	2	107.15	0.0934116	1.0296	-0.823476	1.76966	FALSE	18.9284311903807	18.6471548754679	18.6833893986506	19.475258482341	18.8257208924199	20.4284233120246
G4VFY8;G4VFY9	tr|G4VFY8|G4VFY8_SCHMA Lipase maturation factor OS=Schistosoma mansoni GN=Smp_026910.1 PE=3 SV=1;tr|G4VFY9|G4VFY9_SCHMA Lipase maturation factor OS=Schistosoma mansoni GN=Smp_026910.2 PE=3 SV=1	8	73.83	0.331734	0.47921	0.295712	1.22749	FALSE	20.0119499227665	19.891348752208	20.427859559469	19.979847142687	19.3324527084258	20.1317209148537
G4VG02	tr|G4VG02|G4VG02_SCHMA Phosphatidylinositol transfer protein OS=Schistosoma mansoni GN=Smp_197450 PE=4 SV=1	7	108.7	0.0114243	1.94217	1.41938	2.6747	FALSE	17.7123273474945	17.1174533001577	17.34015688498	15.8439075765684	15.3249108280769	16.7429816650946
G4VG30;B1NYH8	tr|G4VG30|G4VG30_SCHMA Venom allergen-like (VAL) 8 protein OS=Schistosoma mansoni GN=Smp_123550 PE=3 SV=1;tr|B1NYH8|B1NYH8_SCHMA Venom allergen-like protein 8 (Fragment) OS=Schistosoma mansoni PE=2 SV=1	2	29.86	0.0311222	1.50693	2.92153	7.57648	FALSE	19.5201142788504	19.7526690396081	20.5668982604433	14.6259766897051	17.8218314051398	18.6272893928869
G4VG38	tr|G4VG38|G4VG38_SCHMA Putative 60s ribosomal protein L9 OS=Schistosoma mansoni GN=Smp_018990 PE=4 SV=1	5	20.679	0.410454	0.386736	0.416466	1.33465	FALSE	21.5298004438203	19.9766694059867	21.6593486053819	20.8037399191732	20.4878263868378	20.6248554724924
G4VG40	tr|G4VG40|G4VG40_SCHMA Dipeptidyl peptidase 3 OS=Schistosoma mansoni GN=Smp_019010 PE=3 SV=1	27	81.887	0.440397	0.356156	-0.131524	1.09545	FALSE	23.1762325587917	23.0761409077386	22.9664286797337	23.3189692214808	23.1272189148758	23.1671845757694
G4VG41	tr|G4VG41|G4VG41_SCHMA Putative choline/ethanolamine kinase OS=Schistosoma mansoni GN=Smp_132570 PE=4 SV=1	4	34.094	0.598274	0.2231	0.150331	1.10982	FALSE	18.2648964907669	18.2447393628326	17.5024007096227	17.9905298204447	17.9655894408307	17.6049243102471
G4VG42;Q26563	tr|G4VG42|G4VG42_SCHMA Putative cathepsin C OS=Schistosoma mansoni GN=Smp_019030 PE=3 SV=1;sp|Q26563|CATC_SCHMA Cathepsin C OS=Schistosoma mansoni PE=2 SV=1	5	51.828	0.121541	0.915278	0.460415	1.37594	FALSE	18.9718575380579	19.0583799260566	19.2279175697894	19.1070422091522	18.2887178591185	18.4811509740165
G4VG45;G4VG46	tr|G4VG45|G4VG45_SCHMA Tubulin-specific chaperone A OS=Schistosoma mansoni GN=Smp_019050.1 PE=3 SV=1;tr|G4VG46|G4VG46_SCHMA Tubulin-specific chaperone A OS=Schistosoma mansoni GN=Smp_019050.2 PE=3 SV=1	3	12.649	0.45742	0.339685	-0.192115	1.14244	FALSE	21.0173848585923	20.7899572379975	20.4787299357528	20.7375398255054	21.3110111574986	20.8138675446599
G4VG47	tr|G4VG47|G4VG47_SCHMA Protein transport protein Sec61 subunit beta OS=Schistosoma mansoni GN=Smp_019060 PE=3 SV=1	1	9.2256	0.136941	0.863468	-1.87428	3.66618	FALSE	14.2283307302282	18.3964032204148	17.854535436539	19.0497405504931	18.691218468878	18.3611411674441
G4VG55	tr|G4VG55|G4VG55_SCHMA Coatomer subunit epsilon OS=Schistosoma mansoni GN=Smp_169690 PE=3 SV=1	5	33.274	0.998658	0.000583284	-0.000730058	1.00051	FALSE	19.9548469139159	19.0883428991511	20.6365614715318	19.9870576285379	19.5705729796626	20.1243108512708
G4VG71	tr|G4VG71|G4VG71_SCHMA Putative gynecophoral canal protein OS=Schistosoma mansoni GN=Smp_177050 PE=4 SV=1	21	93.636	0.0843891	1.07371	0.44712	1.36332	FALSE	24.0585044206912	24.0434095643768	23.5276132286445	23.4742509177498	23.2499333836963	23.5639843903656
G4VG96	tr|G4VG96|G4VG96_SCHMA Cell polarity protein OS=Schistosoma mansoni GN=Smp_130280 PE=4 SV=1	46	279.49	0.00802581	2.09551	0.721187	1.64854	FALSE	21.0278485059488	20.9748771027511	21.260208266631	20.5302939700708	20.151225342888	20.4178546848107
G4VGA3	tr|G4VGA3|G4VGA3_SCHMA Prolyl oligopeptidase (S09 family) OS=Schistosoma mansoni GN=Smp_210740 PE=3 SV=1	9	62.997	0.10966	0.959951	-0.359647	1.28311	FALSE	20.8884104260379	20.8453714628389	21.2680840256062	21.2164299209132	21.4824948957591	21.3818834661346
G4VGA5	tr|G4VGA5|G4VGA5_SCHMA Sodium/potassium-transporting ATPase subunit alpha OS=Schistosoma mansoni GN=Smp_015020 PE=3 SV=1	14	113.48	1.06349e-05	4.97327	2.1097	4.31603	TRUE	20.3941192493757	20.3741574163544	20.1922717481365	18.1836830527438	18.1547807764421	18.2929741840885
G4VGA7	tr|G4VGA7|G4VGA7_SCHMA Choline kinase OS=Schistosoma mansoni GN=Smp_015050 PE=4 SV=1	1	47.747	0.000247227	3.6069	-1.96296	3.89861	TRUE	14.2283307302282	14.5011210631332	14.4707619788912	16.0193508533595	16.826388343295	16.2433528164333
G4VGA9;G4VGB0	tr|G4VGA9|G4VGA9_SCHMA Putative vacuolar ATP synthase subunit h OS=Schistosoma mansoni GN=Smp_015070.1 PE=4 SV=1;tr|G4VGB0|G4VGB0_SCHMA Putative vacuolar ATP synthase subunit h OS=Schistosoma mansoni GN=Smp_015070.2 PE=4 SV=1	7	28.274	0.0982672	1.00759	0.357065	1.28082	FALSE	20.996297673874	20.9051706201811	21.3496359904918	20.6808097095145	20.7339662927468	20.7651344233353
G4VGB1	tr|G4VGB1|G4VGB1_SCHMA Putative vacuolar ATP synthase subunit h OS=Schistosoma mansoni GN=Smp_117810 PE=4 SV=1	2	12.625	0.953851	0.0205193	0.0135149	1.00941	FALSE	20.1718339522302	20.3971038493509	20.6068278837457	20.3144382794603	20.1235979032011	20.6971849121989
G4VGB4	tr|G4VGB4|G4VGB4_SCHMA Coatomer subunit beta OS=Schistosoma mansoni GN=Smp_015090 PE=3 SV=1	18	108.8	0.0603622	1.21924	0.529623	1.44355	FALSE	20.1074309194046	20.3091718745757	19.7995548048438	19.3280900397888	19.4422194039895	19.8569776632331
G4VGD5	tr|G4VGD5|G4VGD5_SCHMA Family S33 non-peptidase homologue (S33 family) OS=Schistosoma mansoni GN=Smp_194720 PE=4 SV=1	4	39.819	0.173997	0.759459	0.316707	1.24548	FALSE	20.2451720215891	20.2251448332852	19.9562277765203	19.9155290389021	19.5264080234749	20.0344857818401
G4VGE0	tr|G4VGE0|G4VGE0_SCHMA Putative replication factor A 1, rfa1 OS=Schistosoma mansoni GN=Smp_121800 PE=4 SV=1	2	61.872	0.0123032	1.90998	1.91875	3.78094	FALSE	17.3556665270356	16.6558457346608	16.8833755249073	14.6259766897051	14.2728824249109	16.2397912435275
G4VGE6	tr|G4VGE6|G4VGE6_SCHMA Uncharacterized protein OS=Schistosoma mansoni GN=Smp_194650 PE=4 SV=1	4	158.36	0.0147058	1.83251	-1.49539	2.8194	FALSE	14.2283307302282	15.1690198281335	13.8911132141368	15.862546724033	15.3745439190907	16.537531197995
G4VGE8	tr|G4VGE8|G4VGE8_SCHMA Putative 26s proteasome non-ATPase regulatory subunit OS=Schistosoma mansoni GN=Smp_052870 PE=4 SV=1	14	45.086	0.192149	0.716362	0.236512	1.17814	FALSE	21.9105980444987	22.0147972565521	21.8355066277363	21.5486561361936	21.7076138481142	21.7950964839365
G4VGF4	tr|G4VGF4|G4VGF4_SCHMA Skp1-related OS=Schistosoma mansoni GN=Smp_052910 PE=3 SV=1	4	18.702	0.0056372	2.24894	-0.725622	1.65361	FALSE	20.1514448318717	20.0418183461608	20.2697270131556	20.7646152584404	21.07042176805	20.8048183813024
G4VGG1;G4VGG0	tr|G4VGG1|G4VGG1_SCHMA Putative proteasome inhibitor OS=Schistosoma mansoni GN=Smp_066340.1 PE=4 SV=1;tr|G4VGG0|G4VGG0_SCHMA Putative proteasome inhibitor OS=Schistosoma mansoni GN=Smp_066340.2 PE=4 SV=1	5	34.259	0.55667	0.254402	0.203518	1.1515	FALSE	18.8789490961122	19.1816866190405	18.7553797134441	18.3585639570021	19.4060431626702	18.4408551785834
G4VGG5	tr|G4VGG5|G4VGG5_SCHMA Uncharacterized protein OS=Schistosoma mansoni GN=Smp_157980 PE=4 SV=1	3	142.06	0.562199	0.25011	0.524619	1.43855	FALSE	14.2283307302282	15.3955119291676	16.2772341289472	15.3397294531816	13.1171487123882	15.8703427991667
G4VGH2	tr|G4VGH2|G4VGH2_SCHMA Uncharacterized protein OS=Schistosoma mansoni GN=Smp_099800 PE=4 SV=1	28	246.1	0.854566	0.0682542	0.0856015	1.06113	FALSE	19.6764851747918	18.7465951851777	20.2425924228819	19.8341885116775	18.919727112626	19.6549525559914
G4VGH3	tr|G4VGH3|G4VGH3_SCHMA Uncharacterized protein OS=Schistosoma mansoni GN=Smp_099810 PE=4 SV=1	5	27.989	0.752638	0.123414	0.19294	1.14309	FALSE	20.4508387417024	18.7030230213268	20.7864029125717	20.2113447864962	19.3405883884686	19.8095104946801
G4VGH9	tr|G4VGH9|G4VGH9_SCHMA Putative uridine phosphorylase OS=Schistosoma mansoni GN=Smp_082420 PE=1 SV=1	10	32.7	0.000997743	3.00098	0.935686	1.9128	FALSE	20.5970520368851	20.7417176227961	20.6765613817402	19.6570582512103	19.8633550984447	19.6878596597478
G4VGJ9	tr|G4VGJ9|G4VGJ9_SCHMA Putative alpha adaptin carboxyl-terminal domain OS=Schistosoma mansoni GN=Smp_074020 PE=4 SV=1	23	106.71	0.893426	0.0489414	-0.0373073	1.0262	FALSE	20.3562385274558	19.9103505440426	20.0934784350472	20.3131411066319	19.6809723801745	20.4778760251025
G4VGL2	tr|G4VGL2|G4VGL2_SCHMA Isocitrate dehydrogenase [NAD] subunit, mitochondrial OS=Schistosoma mansoni GN=Smp_018680 PE=3 SV=1	9	41.344	0.00263648	2.57898	-0.810984	1.75441	FALSE	22.1439151409294	22.161843738613	21.9416585816927	22.7585837380046	22.9696598809651	22.9521269693413
G4VGL9	tr|G4VGL9|G4VGL9_SCHMA Paraplegin (M41 family) OS=Schistosoma mansoni GN=Smp_018620 PE=3 SV=1	5	69.883	0.832419	0.0796578	0.128835	1.09341	FALSE	17.9785888763416	16.7988011636271	17.0710676717557	18.335722009146	16.5078231401232	16.618408365076
G4VGM5	tr|G4VGM5|G4VGM5_SCHMA Putative rab15, 13, 10, 1, 35, 5, and OS=Schistosoma mansoni GN=Smp_132330 PE=4 SV=1	3	24.238	0.353591	0.451498	0.528982	1.44291	FALSE	16.9191997628374	18.4864872588145	17.679622425493	16.4517991092337	17.1327269682121	17.9138382003578
G4VGM7	tr|G4VGM7|G4VGM7_SCHMA Putative cadherin OS=Schistosoma mansoni GN=Smp_132320 PE=4 SV=1	4	152.3	0.907254	0.0422711	-0.0529781	1.0374	FALSE	19.2470949663668	19.3859031735941	17.8608149294784	18.7389845453094	18.7743836878262	19.1393790497764
G4VGM8;G4VGM9	tr|G4VGM8|G4VGM8_SCHMA Putative nascent polypeptide associated complex alpha subunit (Nac alpha) OS=Schistosoma mansoni GN=Smp_018530.1 PE=4 SV=1;tr|G4VGM9|G4VGM9_SCHMA Putative nascent polypeptide associated complex alpha subunit (Nac alpha) OS=Schistosom	6	22.456	0.508438	0.293762	0.137315	1.09986	FALSE	21.4348891868442	21.6184952680169	21.3094361725796	21.4921596281267	21.4068750438917	21.0518409002647
G4VGN0	tr|G4VGN0|G4VGN0_SCHMA Kinesin-like protein OS=Schistosoma mansoni GN=Smp_132300 PE=3 SV=1	2	86.083	0.118361	0.926793	-1.09461	2.13555	FALSE	17.2260891715112	14.7795856858941	15.7633080000553	17.1240395241182	17.0123602122817	16.9164146977918
G4VGQ5	tr|G4VGQ5|G4VGQ5_SCHMA Glycogen [starch] synthase OS=Schistosoma mansoni GN=Smp_018260 PE=3 SV=1	24	80.688	0.000631366	3.19972	-1.04423	2.06226	TRUE	21.3719347143054	21.1810038996258	21.2909173076706	22.342149473722	22.2012041069979	22.4331790412439
G4VGQ7;G4VGQ6	tr|G4VGQ7|G4VGQ7_SCHMA Putative troponin I OS=Schistosoma mansoni GN=Smp_018250.1 PE=4 SV=1;tr|G4VGQ6|G4VGQ6_SCHMA Putative troponin I OS=Schistosoma mansoni GN=Smp_018250.2 PE=4 SV=1	9	26.274	0.0531305	1.27466	-0.422524	1.34027	FALSE	26.9579122146574	26.8107413153826	26.6878419764755	27.0534241149938	27.372476761567	27.2981657539329
G4VGR1	tr|G4VGR1|G4VGR1_SCHMA Putative 30s ribosomal protein S8 OS=Schistosoma mansoni GN=Smp_076740 PE=3 SV=1	2	14.976	0.701823	0.153773	-0.158707	1.11629	FALSE	20.9295698897387	19.6585112729666	20.0557432957732	20.8575591952079	20.2263636487785	20.0360223153115
G4VGS4;G4VGS3;G4VGS2	tr|G4VGS4|G4VGS4_SCHMA Serine/threonine-protein phosphatase OS=Schistosoma mansoni GN=Smp_028990.1 PE=3 SV=1;tr|G4VGS3|G4VGS3_SCHMA Serine/threonine-protein phosphatase OS=Schistosoma mansoni GN=Smp_028990.3 PE=3 SV=1;tr|G4VGS2|G4VGS2_SCHMA Serine/threonin	5	37.408	0.0133708	1.87384	0.606651	1.52272	FALSE	19.5302684271321	19.566077914755	19.4680412227799	19.0354208382861	18.6774959441973	19.0315178379305
G4VGT4	tr|G4VGT4|G4VGT4_SCHMA Ubiquinone biosynthesis O-methyltransferase, mitochondrial OS=Schistosoma mansoni GN=Smp_029060 PE=3 SV=1	1	32.405	0.00561684	2.25051	-0.982756	1.97624	FALSE	17.5407000508212	17.5372203549348	18.1488879700015	18.8907720400439	18.5606701240109	18.7236334124606
G4VGT9;G4VGU0	tr|G4VGT9|G4VGT9_SCHMA Uncharacterized protein OS=Schistosoma mansoni GN=Smp_029100.1 PE=4 SV=1;tr|G4VGU0|G4VGU0_SCHMA Uncharacterized protein OS=Schistosoma mansoni GN=Smp_029100.2 PE=4 SV=1	3	13.912	0.401544	0.396267	-0.712136	1.63823	FALSE	17.0906062967632	19.7668330598097	19.3714164240608	20.3591859708995	18.9999351132266	19.006141504752
G4VGU2	tr|G4VGU2|G4VGU2_SCHMA Putative chloride intracellular channel OS=Schistosoma mansoni GN=Smp_137920 PE=4 SV=1	7	29.75	0.570336	0.243869	0.0895796	1.06406	FALSE	21.6480728057752	21.6945087673993	21.7852972361413	21.5612771087711	21.6533766394098	21.6444862504122
G4VGU4	tr|G4VGU4|G4VGU4_SCHMA Putative guanylate kinase OS=Schistosoma mansoni GN=Smp_137940 PE=4 SV=1	6	20.472	0.307389	0.512312	-0.290331	1.22292	FALSE	20.1417793493945	20.324642928824	20.0578579612823	20.6702899008756	20.7640485302721	19.9609359324454
G4VGV3	tr|G4VGV3|G4VGV3_SCHMA Uncharacterized protein OS=Schistosoma mansoni GN=Smp_029230 PE=4 SV=1	2	10.599	0.215415	0.666724	-1.35111	2.55108	FALSE	14.2283307302282	16.9478926616523	18.0740796787345	17.1846689593737	17.9494703943843	18.1694914431568
G4VGW5	tr|G4VGW5|G4VGW5_SCHMA Uncharacterized protein OS=Schistosoma mansoni GN=Smp_177190 PE=4 SV=1	4	37.134	0.007177	2.14406	-2.79556	6.94301	TRUE	14.887357490531	16.8691385502378	14.4707619788912	17.5409602242162	18.1775491658213	18.8954308949783
G4VGX1	tr|G4VGX1|G4VGX1_SCHMA Putative actin-depolymerizing factor OS=Schistosoma mansoni GN=Smp_086590 PE=3 SV=1	7	16.41	0.152282	0.817353	-0.84637	1.79797	FALSE	20.1786911770181	21.7845646928236	21.9936187622412	22.2485356749805	22.4576444962901	21.7898043288948
G4VGX9	tr|G4VGX9|G4VGX9_SCHMA Putative syntaxin binding protein-1,2,3 OS=Schistosoma mansoni GN=Smp_131870 PE=3 SV=1	20	66.586	0.0909353	1.04127	0.525851	1.43978	FALSE	20.7288670236444	20.2847710980056	21.1097416404564	20.3488283201527	19.9487739449183	20.2482243041932
G4VGY6	tr|G4VGY6|G4VGY6_SCHMA Putative atp synthase subunit d OS=Schistosoma mansoni GN=Smp_103200 PE=3 SV=1	3	28.238	0.903621	0.0440139	0.129233	1.09371	FALSE	17.1688314640687	14.6217231538501	17.8233181251367	17.4673500643909	16.829539392184	14.9292853108938
G4VH00	tr|G4VH00|G4VH00_SCHMA Putative pur-alpha OS=Schistosoma mansoni GN=Smp_075120 PE=4 SV=1	2	33.754	0.135228	0.868934	1.94418	3.8482	FALSE	16.4469484110424	15.7656399366176	19.3078496613327	16.8828785100574	14.2728824249109	14.5321256808221
G4VH12	tr|G4VH12|G4VH12_SCHMA Putative ubiquitin-activating enzyme e1 OS=Schistosoma mansoni GN=Smp_162630.1 PE=4 SV=1	27	102.42	0.165947	0.78003	-0.494125	1.40847	FALSE	21.6543030169544	21.7465853679539	20.7698141310611	22.1423236218261	21.6706698969227	21.8400826594567
G4VH20	tr|G4VH20|G4VH20_SCHMA Uncharacterized protein OS=Schistosoma mansoni GN=Smp_074870 PE=4 SV=1	9	29.818	0.0845904	1.07268	-0.471912	1.38695	FALSE	20.5573271758951	21.2459899533629	21.1564071766472	21.4395369001806	21.5050781236348	21.4308448525257
G4VH28	tr|G4VH28|G4VH28_SCHMA Putative 40s ribosomal protein S18 OS=Schistosoma mansoni GN=Smp_074780 PE=3 SV=1	4	17.769	0.366216	0.436263	-0.163879	1.1203	FALSE	21.9864547215801	21.761139422398	21.6847493081658	22.062193364381	21.8732693523367	21.9885191378815
G4VH48	tr|G4VH48|G4VH48_SCHMA Secretory carrier-associated membrane protein OS=Schistosoma mansoni GN=Smp_013460 PE=3 SV=1	3	36.975	7.20641e-05	4.14228	1.90489	3.74479	TRUE	19.5567147615631	19.6053464548277	20.0351401208826	17.8483788516993	17.7047456989443	17.9294175962864
G4VH63;G4VH64	tr|G4VH63|G4VH63_SCHMA Putative surface protein PspC OS=Schistosoma mansoni GN=Smp_055220.3 PE=4 SV=1;tr|G4VH64|G4VH64_SCHMA Putative surface protein PspC OS=Schistosoma mansoni GN=Smp_055220.2 PE=4 SV=1	3	82.073	0.149768	0.824581	1.19936	2.29637	FALSE	17.0289114071355	16.8362300320724	14.5732276999426	14.6259766897051	15.682196374367	14.5321256808221
G4VH65	tr|G4VH65|G4VH65_SCHMA Microsomal GST-3 OS=Schistosoma mansoni GN=Smp_055210 PE=4 SV=1	6	17.961	0.0431026	1.3655	-0.642988	1.56156	FALSE	24.0769738558867	23.3987289988258	23.9785351258099	24.6700899200449	24.2021540898374	24.5109568544519
G4VH66	tr|G4VH66|G4VH66_SCHMA Dolichyl-diphosphooligosaccharide-proteinglycos yl transferase-related OS=Schistosoma mansoni GN=Smp_055200 PE=4 SV=1	3	37.97	0.229604	0.63902	0.746837	1.67811	FALSE	18.1709838814747	19.6096923484141	19.549169372011	18.1967141655887	17.6568348568392	19.235785397337
G4VH74	tr|G4VH74|G4VH74_SCHMA Putative nebulin OS=Schistosoma mansoni GN=Smp_151490 PE=4 SV=1	4	28.108	0.000164429	3.78402	-4.54391	23.3267	TRUE	16.6204162542183	15.991173528981	14.4707619788912	20.0891084823248	20.3684365295809	20.2565330420537
G4VH80	tr|G4VH80|G4VH80_SCHMA Putative 40s ribosomal protein S17 OS=Schistosoma mansoni GN=Smp_055050 PE=3 SV=1	2	14.02	0.982501	0.00766685	0.00803051	1.00558	FALSE	21.6465447650296	20.4858757779345	20.7398338449237	21.2744454187071	20.6895519617724	20.8841654730745
G4VH87;G4VH86;G4VH88	tr|G4VH87|G4VH87_SCHMA Restin-like OS=Schistosoma mansoni GN=Smp_149200.3 PE=4 SV=1;tr|G4VH86|G4VH86_SCHMA Restin-like OS=Schistosoma mansoni GN=Smp_149200.2 PE=4 SV=1;tr|G4VH88|G4VH88_SCHMA Restin-like OS=Schistosoma mansoni GN=Smp_149200.1 PE=4 SV=1	26	156.18	0.0143912	1.8419	-0.959138	1.94415	FALSE	19.0463030701464	18.9819829597053	18.1378950442152	19.6995855474813	19.5985309408529	19.7454793273955
G4VH95	tr|G4VH95|G4VH95_SCHMA Putative acyl-CoA-binding protein (Acbp) (Diazepam binding inhibitor) (Dbi) (Endozepine) OS=Schistosoma mansoni GN=Smp_149150 PE=4 SV=1	2	38.151	0.0460543	1.33673	-0.695171	1.61908	FALSE	20.4169698824233	20.3740303234555	19.692600716749	20.8676398537238	21.1450976943595	20.5563757346096
G4VH98	tr|G4VH98|G4VH98_SCHMA Putative fimbrin/plastin OS=Schistosoma mansoni GN=Smp_149130 PE=4 SV=1	2	101.51	0.369014	0.432958	-0.974849	1.96544	FALSE	15.8320495589847	18.9952644808106	18.5282539450662	17.3594108886226	19.2589118075352	19.6617933632334
G4VHA9	tr|G4VHA9|G4VHA9_SCHMA Putative nedd8-conjugating enzyme nce2 OS=Schistosoma mansoni GN=Smp_027370 PE=3 SV=1	4	21.213	0.0026297	2.58009	-1.59247	3.01565	TRUE	19.0667710131184	19.2585467510967	18.5415731554192	20.8026700313436	20.8541311672292	19.9874984834061
G4VHB0	tr|G4VHB0|G4VHB0_SCHMA Uncharacterized protein OS=Schistosoma mansoni GN=Smp_027360 PE=4 SV=1	2	10.31	0.127346	0.895016	-0.722543	1.65009	FALSE	19.8729656657676	20.277451197664	19.2745356772616	20.9367862438633	20.8546517675537	19.8011440370393
G4VHB1	tr|G4VHB1|G4VHB1_SCHMA Putative dynactin subunit 3 (Dynactin light chain p24) OS=Schistosoma mansoni GN=Smp_136990 PE=4 SV=1	1	16.097	0.164312	0.784331	-0.40263	1.32192	FALSE	19.3481655725309	20.2223237626935	19.897834075845	20.2356925011509	20.2640269571932	20.1764944919079
G4VHB5	tr|G4VHB5|G4VHB5_SCHMA Putative sideroflexin 1,2,3 OS=Schistosoma mansoni GN=Smp_136960 PE=4 SV=1	6	164.53	0.403747	0.393891	0.878344	1.83826	FALSE	18.3875265393544	16.2059775385272	18.7470162405095	17.7389845453094	15.1485736277269	17.8179307931721
G4VHC0	tr|G4VHC0|G4VHC0_SCHMA PRX_like2 domain-containing protein OS=Schistosoma mansoni GN=Smp_194940 PE=4 SV=1	1	22.665	0.401418	0.396403	0.528396	1.44232	FALSE	16.2909887768811	16.3740150715552	16.7246156624142	14.6259766897051	16.9150853334736	16.2633706501614
G4VHC1	tr|G4VHC1|G4VHC1_SCHMA Uncharacterized protein OS=Schistosoma mansoni GN=Smp_136930 PE=3 SV=1	4	48.066	0.00577816	2.23821	-1.19584	2.29079	TRUE	17.793387313776	18.5384003251495	18.0023998622818	19.1876822513221	19.7052900966106	19.0287422373805
G4VHD9	tr|G4VHD9|G4VHD9_SCHMA T-complex protein 1 subunit delta OS=Schistosoma mansoni GN=Smp_004600 PE=3 SV=1	24	58.047	0.546881	0.262107	0.130485	1.09466	FALSE	23.5689993368145	23.24326157454	23.6900307425597	23.5807133608543	23.1733789175631	23.3567432716924
G4VHF4	tr|G4VHF4|G4VHF4_SCHMA Putative camp-dependent protein kinase type II regulatory subunit OS=Schistosoma mansoni GN=Smp_131050 PE=4 SV=1	4	33.82	0.573763	0.241267	0.158266	1.11594	FALSE	19.3603897282849	19.5237412820895	19.1136773144259	19.4607798768257	19.3790424162607	18.6831883407882
G4VHG0	tr|G4VHG0|G4VHG0_SCHMA Uncharacterized protein OS=Schistosoma mansoni GN=Smp_131080 PE=4 SV=1	3	27.353	0.167725	0.775401	-0.801859	1.74335	FALSE	17.7032943128295	19.1438128716275	18.0262110849728	18.2768428891642	19.5894444709168	19.4126087912643
G4VHG1	tr|G4VHG1|G4VHG1_SCHMA Putative ran-binding protein OS=Schistosoma mansoni GN=Smp_016410 PE=4 SV=1	10	225.79	0.863254	0.0638613	-0.0393906	1.02768	FALSE	17.4784442365228	16.8547978298644	17.2261384908255	17.2610955855271	17.3617758854651	17.0546807453655
G4VHH1	tr|G4VHH1|G4VHH1_SCHMA Uncharacterized protein OS=Schistosoma mansoni GN=Smp_194910 PE=4 SV=1	3	21.036	0.0434395	1.36211	4.01085	16.1207	FALSE	23.8396843862215	23.5877814546651	24.345285182805	22.1440717728096	21.4633610500327	16.1327799122255
G4VHH2	tr|G4VHH2|G4VHH2_SCHMA Uncharacterized protein Smp_202610 OS=Schistosoma mansoni GN=Smp_202610 PE=4 SV=1	1	15.599	0.0402946	1.39475	3.57095	11.884	FALSE	21.120375225594	20.6139821411637	21.6143189279486	19.3644029636639	14.2728824249109	18.9985510739087
G4VHH3;G4VHH4	tr|G4VHH3|G4VHH3_SCHMA Uncharacterized protein OS=Schistosoma mansoni GN=Smp_016490.1 PE=4 SV=1;tr|G4VHH4|G4VHH4_SCHMA Uncharacterized protein OS=Schistosoma mansoni GN=Smp_016490.2 PE=4 SV=1	1	22.413	0.000177431	3.75097	1.77666	3.42631	TRUE	19.5707538924406	19.1764198691608	19.5862493305337	17.9403283400224	17.445363070123	17.61776353276
G4VHJ2	tr|G4VHJ2|G4VHJ2_SCHMA Putative rab-2,4,14 OS=Schistosoma mansoni GN=Smp_055670 PE=4 SV=1	2	25.117	0.256863	0.590298	0.482838	1.39749	FALSE	18.437947750996	17.5405761994375	18.3118953661904	17.2466915730824	18.2837780241308	17.3114354452977
G4VHK2	tr|G4VHK2|G4VHK2_SCHMA Family M41 unassigned peptidase (M41 family) OS=Schistosoma mansoni GN=Smp_055760.1 PE=3 SV=1	1	61.428	0.173618	0.760405	-0.32266	1.25063	FALSE	14.2283307302282	14.5011210631332	14.4707619788912	14.5186624001936	14.6015187330432	15.0480123628573
G4VHK5;Q26599	tr|G4VHK5|G4VHK5_SCHMA Smdr2 OS=Schistosoma mansoni GN=Smp_055780 PE=4 SV=1;tr|Q26599|Q26599_SCHMA SMDR2 OS=Schistosoma mansoni GN=ATP-cassette family protein PE=4 SV=1	6	106.58	0.0860046	1.06548	1.34918	2.54768	FALSE	17.0584131668159	16.4632006567184	17.2732986136393	16.8559753658297	14.2728824249109	15.6185021348619
G4VHK8;C4QIC0;G4VTA4	tr|G4VHK8|G4VHK8_SCHMA Tubulin beta chain OS=Schistosoma mansoni GN=Smp_192110 PE=3 SV=1;tr|C4QIC0|C4QIC0_SCHMA Tubulin beta chain OS=Schistosoma mansoni GN=Smp_078040 PE=3 SV=1;tr|G4VTA4|G4VTA4_SCHMA Tubulin beta chain OS=Schistosoma mansoni GN=Smp_079960	33	49.816	0.0439258	1.35728	-0.479272	1.39404	FALSE	26.7671424885641	26.5270300014479	27.0426472629458	27.2690285760812	27.2610916091546	27.2445147976432
G4VHL2	tr|G4VHL2|G4VHL2_SCHMA Gamma-glutamyltransferase-like protein 3 (T03 family) OS=Schistosoma mansoni GN=Smp_089100 PE=4 SV=1	8	58.591	0.0857927	1.06655	0.330537	1.25748	FALSE	19.4815329368645	19.6409782867169	19.7859267250752	19.2829098694892	19.3246574633873	19.3092586681797
G4VHL4	tr|G4VHL4|G4VHL4_SCHMA Proteasome endopeptidase complex OS=Schistosoma mansoni GN=Smp_170730 PE=3 SV=1	11	72.443	0.179206	0.746647	-0.435314	1.3522	FALSE	20.7560464165213	21.1652996494891	20.520832699866	20.857606027593	21.6767390874653	21.213775254118
G4VHL5;G4VHL7;G4VHL6	tr|G4VHL5|G4VHL5_SCHMA Putative eukaryotic translation initiation factor 4h OS=Schistosoma mansoni GN=Smp_089060.2 PE=4 SV=1;tr|G4VHL7|G4VHL7_SCHMA Putative eukaryotic translation initiation factor 4h OS=Schistosoma mansoni GN=Smp_089060.3 PE=4 SV=1;tr|G4V	2	24.903	0.24472	0.61133	0.499912	1.41413	FALSE	18.0666634777098	18.5698557108009	18.5132087006021	17.0632861628801	18.3286674241672	18.2580385940201
G4VHM5;G4VHM6	tr|G4VHM5|G4VHM5_SCHMA Putative translocon-associated protein, delta subunit OS=Schistosoma mansoni GN=Smp_089000.1 PE=4 SV=1;tr|G4VHM6|G4VHM6_SCHMA Putative translocon-associated protein, delta subunit OS=Schistosoma mansoni GN=Smp_089000.2 PE=4 SV=1	1	14.561	0.368654	0.433381	-0.27796	1.21248	FALSE	18.249062736088	18.6782444285038	17.7864539233396	18.5504013402031	18.2254898594983	18.7717500306231
G4VHN0	tr|G4VHN0|G4VHN0_SCHMA Uncharacterized protein OS=Schistosoma mansoni GN=Smp_170630 PE=4 SV=1	24	60.113	0.0278895	1.55456	0.56321	1.47755	FALSE	23.8896457322574	24.0095502332061	23.6619227972984	23.120164233323	23.2164450092213	23.5348787993789
G4VHN1	tr|G4VHN1|G4VHN1_SCHMA Putative importin beta-1 OS=Schistosoma mansoni GN=Smp_038080.1 PE=4 SV=1	13	101.21	0.263924	0.578521	-0.295352	1.22718	FALSE	19.9370893188291	20.2621497431867	19.4735222156147	20.2498208631649	20.08367864559	20.2253178419179
G4VHN3	tr|G4VHN3|G4VHN3_SCHMA ATP synthase subunit beta OS=Schistosoma mansoni GN=Smp_038100 PE=3 SV=1	23	55.836	0.00372636	2.42872	-0.812316	1.75603	FALSE	25.7293500638279	25.6116933239514	25.9464603288719	26.4560784405663	26.5438886734886	26.7244853485738
G4VHP2;G4VHP3	tr|G4VHP2|G4VHP2_SCHMA Putative o-methyltransferase OS=Schistosoma mansoni GN=Smp_052470 PE=4 SV=1;tr|G4VHP3|G4VHP3_SCHMA Putative o-methyltransferase OS=Schistosoma mansoni GN=Smp_012560 PE=4 SV=1	1	15.482	0.208718	0.680441	0.311827	1.24128	FALSE	18.1487043803579	18.7495373402378	18.7273462603694	18.2117405333211	18.3445120140844	18.133854533232
G4VHP4	tr|G4VHP4|G4VHP4_SCHMA Putative cullin OS=Schistosoma mansoni GN=Smp_150270 PE=3 SV=1	4	98.502	0.111947	0.950986	-1.33218	2.51783	FALSE	14.2283307302282	14.5011210631332	13.394428927488	16.2588845582118	13.798383007121	16.0631625877233
G4VHP9	tr|G4VHP9|G4VHP9_SCHMA Beta-hexosaminidase OS=Schistosoma mansoni GN=Smp_053900 PE=3 SV=1	6	60.937	0.480486	0.318319	-0.192056	1.14239	FALSE	19.2009568026649	19.8985766806421	19.8306584178049	19.5737601205232	19.9389881852227	19.9936116071327
G4VHQ2	tr|G4VHQ2|G4VHQ2_SCHMA 3-hydroxyacyl-CoA dehydrogenase OS=Schistosoma mansoni GN=Smp_151030 PE=3 SV=1	8	26.617	0.0366836	1.43553	-0.751325	1.68334	FALSE	20.5568487494139	20.6040466318934	21.4055045205302	21.8163243150874	21.4958107014895	21.5082412621017
G4VHQ4	tr|G4VHQ4|G4VHQ4_SCHMA Putative heterogeneous nuclear ribonucleoprotein OS=Schistosoma mansoni GN=Smp_053940.1 PE=4 SV=1	9	33.931	0.180333	0.743926	0.218244	1.16332	FALSE	23.064575030019	23.0782487132625	23.0633591715589	22.8680583564219	22.8287295632669	22.854662800699
G4VHS0	tr|G4VHS0|G4VHS0_SCHMA Putative 40s ribosomal protein S14 OS=Schistosoma mansoni GN=Smp_053830 PE=3 SV=1	7	16.319	0.386782	0.412533	0.29144	1.22386	FALSE	23.9952916780374	23.689334111594	22.9419257651127	23.5023049404401	23.1880300595278	23.0618960718415
G4VHT1;Q26595;G4V865	tr|G4VHT1|G4VHT1_SCHMA Tubulin alpha chain OS=Schistosoma mansoni GN=Smp_090120.2 PE=3 SV=1;tr|Q26595|Q26595_SCHMA Tubulin alpha chain OS=Schistosoma mansoni GN=sat1 PE=2 SV=1;tr|G4V865|G4V865_SCHMA Tubulin alpha chain OS=Schistosoma mansoni GN=Smp_103790	29	48.411	0.0617136	1.20962	-0.359217	1.28273	FALSE	26.9479123980312	26.9383297382241	26.9844300319474	27.1736212372835	27.4288137098098	27.3458886394323
G4VHV6	tr|G4VHV6|G4VHV6_SCHMA Filamin-related OS=Schistosoma mansoni GN=Smp_198050 PE=4 SV=1	22	64.838	0.0018454	2.73391	0.988773	1.9845	FALSE	22.7428362306871	22.7493805766779	22.6456586361192	21.6639035055314	21.5138156025071	21.993837522423
G4VHW2	tr|G4VHW2|G4VHW2_SCHMA Uracil-DNA glycosylase OS=Schistosoma mansoni GN=Smp_158920 PE=3 SV=1	13	89.617	0.693323	0.159064	0.0927495	1.0664	FALSE	20.9437649084339	21.1007152354039	20.5227732478048	20.5707351827256	20.733723734665	20.9845458634316
G4VHW4	tr|G4VHW4|G4VHW4_SCHMA Protein kinase OS=Schistosoma mansoni GN=Smp_067810 PE=3 SV=1	4	41.376	0.631878	0.199367	0.12292	1.08894	FALSE	18.6968817851219	18.1709875231751	18.9510186108342	18.6271736708969	18.4151877474657	18.4077676986001
G4VHX9	tr|G4VHX9|G4VHX9_SCHMA Proteasome endopeptidase complex OS=Schistosoma mansoni GN=Smp_092280 PE=3 SV=1	9	28.086	0.435243	0.361268	0.1379	1.1003	FALSE	22.7949866416124	22.5425000194421	22.5212414532448	22.5738171339019	22.4284421994173	22.4427678482321
G4VHY2	tr|G4VHY2|G4VHY2_SCHMA Uncharacterized protein OS=Schistosoma mansoni GN=Smp_172650 PE=4 SV=1	3	81.596	0.79176	0.101406	0.0763563	1.05435	FALSE	13.9961988702629	14.6555111501279	14.4416977905241	14.5119748005869	13.859989711747	14.4923744319195
G4VHZ1	tr|G4VHZ1|G4VHZ1_SCHMA Carboxypeptidase OS=Schistosoma mansoni GN=Smp_172590 PE=3 SV=1	9	59.84	0.00531852	2.27421	1.5097	2.8475	TRUE	22.1761702608799	21.863138306658	22.489057974594	21.3606076548902	20.2192198683057	20.4194533322654
G4VHZ8	tr|G4VHZ8|G4VHZ8_SCHMA Uncharacterized protein OS=Schistosoma mansoni GN=Smp_150170 PE=4 SV=1	2	74.581	0.934428	0.0294542	-0.0245699	1.01718	FALSE	17.2069944708512	17.3195571195097	17.1193852873629	17.810403963088	17.1006822952594	16.8085604494123
G4VHZ9	tr|G4VHZ9|G4VHZ9_SCHMA Putative growth factor receptor-bound protein OS=Schistosoma mansoni GN=Smp_052250 PE=4 SV=1	1	35.033	0.000187064	3.72801	-1.47898	2.78751	TRUE	14.2283307302282	14.5011210631332	14.4707619788912	15.8036212979979	15.7467253973629	16.0868057339038
G4VI00	tr|G4VI00|G4VI00_SCHMA Putative geranylgeranyl transferase type II beta subunit OS=Schistosoma mansoni GN=Smp_150160 PE=4 SV=1	4	39.584	0.250591	0.601035	0.58851	1.50369	FALSE	17.4910801222372	18.3742082503792	19.0986642899207	17.4156117306181	18.2714876105369	17.5113218352339
G4VI02	tr|G4VI02|G4VI02_SCHMA Putative kunitz-type protease inhibitor OS=Schistosoma mansoni GN=Smp_052230 PE=4 SV=1	6	52.442	0.0208012	1.68191	0.754899	1.68751	FALSE	19.8148180627669	20.056131972656	19.5556088249492	18.8101135986544	18.923191581557	19.4285570202503
G4VI16	tr|G4VI16|G4VI16_SCHMA Succinate--CoA ligase [ADP/GDP-forming] subunit alpha, mitochondrial OS=Schistosoma mansoni GN=Smp_052060 PE=3 SV=1	10	36.58	0.0151159	1.82057	-0.8943	1.85871	FALSE	22.7087441750324	21.9184779325782	22.6932084862253	23.2188017248659	23.2952908882997	23.4892378665644
G4VI26;G4VI27	tr|G4VI26|G4VI26_SCHMA Uncharacterized protein OS=Schistosoma mansoni GN=Smp_149990.1 PE=4 SV=1;tr|G4VI27|G4VI27_SCHMA Uncharacterized protein OS=Schistosoma mansoni GN=Smp_149990.2 PE=4 SV=1	5	77.694	0.0157612	1.80241	0.93334	1.90969	FALSE	17.6132482253413	17.7831583660443	17.2800772979363	16.1353947446705	16.755774543663	16.9852959471293
G4VI28	tr|G4VI28|G4VI28_SCHMA Uncharacterized protein OS=Schistosoma mansoni GN=Smp_051990 PE=4 SV=1	7	102.66	7.93963e-05	4.1002	2.48812	5.61047	TRUE	18.595282601439	19.0014648073734	18.752074967195	16.3035743646425	15.8732752246969	16.707607716267
G4VI38	tr|G4VI38|G4VI38_SCHMA Protein phosphatase methylesterase 1 (S33 family) OS=Schistosoma mansoni GN=Smp_211030 PE=4 SV=1	6	62.876	0.555031	0.255683	-0.2886	1.22145	FALSE	16.9974404809056	15.8355951567711	17.5939254346659	16.8099393519388	17.2923238290316	17.1904979845955
G4VI40	tr|G4VI40|G4VI40_SCHMA Lar interacting protein (Lip)-related protein OS=Schistosoma mansoni GN=Smp_149910 PE=4 SV=1	3	230.06	0.657676	0.181988	-0.158594	1.1162	FALSE	15.2597225230077	16.5092002812438	16.0781526077447	16.2037164776321	16.1916520539869	15.9274888087528
G4VI41	tr|G4VI41|G4VI41_SCHMA Putative chaperonin containing t-complex protein 1, eta subunit, tcph OS=Schistosoma mansoni GN=Smp_149900 PE=3 SV=1	23	59.064	0.95455	0.0202015	-0.0108738	1.00757	FALSE	22.7068263420431	22.4054911816482	22.7475622154333	22.7133664645882	22.4563220685998	22.7228124906861
G4VI62	tr|G4VI62|G4VI62_SCHMA Annexin OS=Schistosoma mansoni GN=Smp_045560 PE=3 SV=1	16	36.885	0.25861	0.587355	-0.257242	1.19519	FALSE	25.4008192645477	25.7836380583861	25.7051755064285	25.6521459291314	25.8787687940135	26.1304435942275
G4VI63	tr|G4VI63|G4VI63_SCHMA Annexin OS=Schistosoma mansoni GN=Smp_045550 PE=3 SV=1	18	53.713	0.00542602	2.26552	-0.816015	1.76054	FALSE	22.0027054374752	21.761139422398	21.8799293833476	22.418833657571	22.8176529730412	22.8553312296453
G4VI64	tr|G4VI64|G4VI64_SCHMA Putative annexin OS=Schistosoma mansoni GN=Smp_207040 PE=4 SV=1	3	57.111	0.00354618	2.45024	-1.70159	3.2526	TRUE	15.443043419214	14.5526828527638	14.88741444877	16.2368163535701	17.289422171107	16.4616828613886
G4VI66	tr|G4VI66|G4VI66_SCHMA Annexin OS=Schistosoma mansoni GN=Smp_045500 PE=3 SV=1	10	60.075	0.389045	0.41	0.179645	1.13261	FALSE	20.7934847854871	20.7476158118818	20.7961471677284	20.3490282086242	20.5581883185776	20.8910953829423
G4VI74	tr|G4VI74|G4VI74_SCHMA Acetyl-CoA synthetase OS=Schistosoma mansoni GN=Smp_168520 PE=4 SV=1	5	78.517	0.600683	0.221355	-0.274801	1.20983	FALSE	17.4145637367854	17.021920566607	16.6347984108123	16.9034214250649	18.3614828632155	16.6307800673236
G4VI80;G4VI78;G4VI77;G4VI79;G4VI76;G4VI75	tr|G4VI80|G4VI80_SCHMA Uncharacterized protein OS=Schistosoma mansoni GN=Smp_038730.10 PE=4 SV=1;tr|G4VI78|G4VI78_SCHMA Uncharacterized protein OS=Schistosoma mansoni GN=Smp_038730.2 PE=4 SV=1;tr|G4VI77|G4VI77_SCHMA Uncharacterized protein OS=Schistosoma m	12	109.76	0.939061	0.0273062	0.0291613	1.02042	FALSE	20.0017214782335	18.9858804722593	19.4563539016543	19.9769183363676	18.9824562137988	19.39709734473
G4VI89	tr|G4VI89|G4VI89_SCHMA Putative small nuclear ribonucleoprotein G (Snrnp-G) OS=Schistosoma mansoni GN=Smp_038680 PE=4 SV=1	2	8.6009	0.787861	0.10355	-0.0841303	1.06005	FALSE	20.0276413561113	20.8007767897051	19.809712956544	20.0821510968971	20.4562240627548	20.3521469116251
G4VI91	tr|G4VI91|G4VI91_SCHMA alpha-1,2-Mannosidase OS=Schistosoma mansoni GN=Smp_143170 PE=3 SV=1	2	82.628	0.969071	0.0136443	-0.0129519	1.00902	FALSE	19.4987523497096	18.6229729297992	18.360904192251	18.9512538951735	18.8478244402698	18.7224069669336
G4VI95	tr|G4VI95|G4VI95_SCHMA Putative eukaryotic translation elongation factor OS=Schistosoma mansoni GN=Smp_143150 PE=4 SV=1	27	60.651	0.340584	0.467775	-0.223541	1.1676	FALSE	23.7912900775616	23.5293500498865	23.1380516302072	23.7518593397364	23.6029864092624	23.7744680185124
G4VI96	tr|G4VI96|G4VI96_SCHMA Putative eukaryotic translation elongation factor OS=Schistosoma mansoni GN=Smp_143140 PE=4 SV=1	16	36.404	0.238169	0.623115	-0.252678	1.19142	FALSE	23.3375035822009	23.2683855449829	22.8737607259731	23.400467335502	23.31041490172	23.5268024495249
G4VI98	tr|G4VI98|G4VI98_SCHMA Putative synaptotagmin OS=Schistosoma mansoni GN=Smp_050630 PE=4 SV=1	5	41.491	0.188889	0.723792	-0.429098	1.34639	FALSE	19.670712868831	19.996156593613	20.6834259230381	20.6064552418874	20.399656215771	20.6314771898503
G4VI99	tr|G4VI99|G4VI99_SCHMA Glut4 vesicle protein-related OS=Schistosoma mansoni GN=Smp_050640 PE=4 SV=1	4	35.681	0.725901	0.139123	-0.0808507	1.05764	FALSE	20.3209472636613	19.7438240778208	20.160217749124	20.1311702494347	19.9796496517773	20.3567213143677
G4VIA5	tr|G4VIA5|G4VIA5_SCHMA Uncharacterized protein OS=Schistosoma mansoni GN=Smp_050730 PE=4 SV=1	3	106.77	0.538428	0.268872	0.571121	1.48568	FALSE	17.4062592137664	14.5011210631332	17.5976513251454	16.1709251873858	15.2692668512285	16.3514771285737
G4VIB3	tr|G4VIB3|G4VIB3_SCHMA Putative synaptojanin OS=Schistosoma mansoni GN=Smp_050830 PE=4 SV=1	2	60.028	0.35356	0.451536	-0.732484	1.6615	FALSE	14.2283307302282	14.5011210631332	16.8096627615886	15.5911154324121	16.5200270976342	15.6254242406673
G4VIB5	tr|G4VIB5|G4VIB5_SCHMA Phosphatidylinositol transfer protein OS=Schistosoma mansoni GN=Smp_137020 PE=4 SV=1	8	35.72	0.000335468	3.47435	1.238	2.35872	TRUE	21.1499864431774	20.9198715884647	21.1981634441693	19.9210072363709	19.7165443299911	19.91646236734
G4VIB9	tr|G4VIB9|G4VIB9_SCHMA NADH dehydrogenase [ubiquinone] 1 alpha subcomplex subunit 8 OS=Schistosoma mansoni GN=Smp_027480 PE=3 SV=1	8	20.686	0.0122965	1.91022	-1.12068	2.17449	FALSE	19.1260238123533	20.0478700018674	19.9590365455037	20.4925517344927	20.8884572934208	21.1139555452497
G4VIC9	tr|G4VIC9|G4VIC9_SCHMA Uncharacterized protein OS=Schistosoma mansoni GN=Smp_050570 PE=4 SV=1	2	15.478	0.303482	0.517867	-1.09639	2.13819	FALSE	14.2283307302282	17.5497872281083	17.8194677495597	17.7030301055224	17.9931418881054	17.1905768268526
G4VID8	tr|G4VID8|G4VID8_SCHMA Calcium-transporting ATPase OS=Schistosoma mansoni GN=Smp_137170 PE=3 SV=1	24	133.57	0.352463	0.452886	0.162744	1.11941	FALSE	20.4963591586036	20.5316022790633	20.646338031018	20.396346818482	20.2594286327285	20.5302915298833
G4VIE6	tr|G4VIE6|G4VIE6_SCHMA Phospholipid scramblase OS=Schistosoma mansoni GN=Smp_008860 PE=3 SV=1	1	18.822	0.0283299	1.54775	-0.479745	1.3945	FALSE	18.9974968923717	19.1378070493073	19.0020191846416	19.5604717444784	19.6667620086469	19.3493246683172
G4VIF6	tr|G4VIF6|G4VIF6_SCHMA Putative dna replication helicase dna2 OS=Schistosoma mansoni GN=Smp_197880 PE=4 SV=1	2	155.3	0.62906	0.201308	0.0964397	1.06913	FALSE	19.9461196608242	20.0133944754143	20.0178783370334	19.6051169347034	19.9814214186176	20.1015350880056
G4VIG2;A9NI59	tr|G4VIG2|G4VIG2_SCHMA Putative 26s protease regulatory subunit OS=Schistosoma mansoni GN=Smp_119310 PE=3 SV=1;tr|A9NI59|A9NI59_SCHMA 26S proteasome subunit RPT6 (Fragment) OS=Schistosoma mansoni GN=RPT6 PE=2 SV=1	18	48.531	0.862837	0.0640715	0.0297999	1.02087	FALSE	21.3809359979887	21.4595255350185	21.2557937267248	21.194461482471	21.4736134769804	21.3387807423817
G4VIG8	tr|G4VIG8|G4VIG8_SCHMA Putative synapsin OS=Schistosoma mansoni GN=Smp_126990 PE=4 SV=1	13	84.758	0.854747	0.0681624	0.0338822	1.02376	FALSE	21.2539350324451	21.0979476217728	20.8235832898741	21.0525498767265	20.9884868068326	21.032782708728
G4VIH9	tr|G4VIH9|G4VIH9_SCHMA Putative helicase OS=Schistosoma mansoni GN=Smp_008830 PE=3 SV=1	5	117.36	0.966444	0.0148233	-0.0167985	1.01171	FALSE	16.1597258328394	16.897569070035	16.7573242338668	16.8881701126757	15.889276394255	17.0875680115138
G4VIJ1;G4VIJ0	tr|G4VIJ1|G4VIJ1_SCHMA Putative gelsolin OS=Schistosoma mansoni GN=Smp_008660.1 PE=4 SV=1;tr|G4VIJ0|G4VIJ0_SCHMA Putative gelsolin OS=Schistosoma mansoni GN=Smp_008660.2 PE=4 SV=1	31	41.709	0.262955	0.580119	0.215003	1.16071	FALSE	25.8258769321073	25.972859145526	26.0622886951413	25.5419871180516	25.8245169937705	25.8495109596268
G4VIJ2	tr|G4VIJ2|G4VIJ2_SCHMA Putative gelsolin (Fragment) OS=Schistosoma mansoni GN=Smp_197860 PE=4 SV=1	13	39.884	0.000152665	3.81626	-2.25616	4.77719	TRUE	21.4864953090124	21.5289790927649	22.3010398485796	23.9660123823959	23.9389005127095	24.1800850644772
G4VIJ4;G4VIJ5;G4VIJ6;G4VIJ7;G4VIJ8	tr|G4VIJ4|G4VIJ4_SCHMA Uncharacterized protein OS=Schistosoma mansoni GN=Smp_067000.2 PE=4 SV=1;tr|G4VIJ5|G4VIJ5_SCHMA Uncharacterized protein OS=Schistosoma mansoni GN=Smp_067000.1 PE=4 SV=1;tr|G4VIJ6|G4VIJ6_SCHMA Uncharacterized protein OS=Schistosoma ma	2	59.191	0.0611926	1.2133	1.36107	2.56876	FALSE	16.4263450263415	15.4657027994746	17.0032779659675	16.007108018783	14.2728824249109	14.5321256808221
G4VIK3	tr|G4VIK3|G4VIK3_SCHMA Putative mitochondrial import inner membrane translocase subunit tim44 OS=Schistosoma mansoni GN=Smp_158380 PE=4 SV=1	10	47.356	0.00339493	2.46917	-0.895821	1.86067	FALSE	19.4820974740969	19.6638650485481	19.327287956629	20.158494545196	20.4386720919554	20.5635468843672
G4VIK7	tr|G4VIK7|G4VIK7_SCHMA Putative hsp70 binding protein hspbp OS=Schistosoma mansoni GN=Smp_066950 PE=4 SV=1	6	34.542	0.196652	0.706301	-1.3738	2.59152	FALSE	15.7144429580729	19.2476279757927	18.9346330146711	19.2235191308801	19.6889682291968	19.1056174492708
G4VIK8	tr|G4VIK8|G4VIK8_SCHMA 60S ribosomal protein L29 OS=Schistosoma mansoni GN=Smp_066940 PE=3 SV=1	1	8.0953	0.614505	0.211475	0.134381	1.09762	FALSE	21.7645240820136	21.5104820126613	21.3147512775999	21.797040066104	21.3467130514238	21.0428619496157
G4VIL3	tr|G4VIL3|G4VIL3_SCHMA Putative 40s ribosomal protein S10 OS=Schistosoma mansoni GN=Smp_066890 PE=4 SV=1	6	17.761	0.289864	0.537806	-0.232208	1.17463	FALSE	23.9145057880709	24.1773487659425	23.6164965090141	24.0978375939033	24.2387237961261	24.068413322136
G4VIM8	tr|G4VIM8|G4VIM8_SCHMA RuvB-like helicase OS=Schistosoma mansoni GN=Smp_064050.2 PE=3 SV=1	11	50.286	0.0560045	1.25178	0.561365	1.47566	FALSE	20.5646749788041	20.4792741221686	20.3366310994735	19.9382926974688	20.2610004407106	19.4971920345018
G4VIN1;G4VIN0	tr|G4VIN1|G4VIN1_SCHMA Cell polarity protein OS=Schistosoma mansoni GN=Smp_064040.1 PE=3 SV=1;tr|G4VIN0|G4VIN0_SCHMA Cell polarity protein OS=Schistosoma mansoni GN=Smp_064040.2 PE=4 SV=1	12	52.632	0.915643	0.038274	-0.0333592	1.02339	FALSE	18.5710382140131	18.4311221562544	19.2095708242097	18.9980951690454	18.3318759337425	18.9818377727899
G4VIN8	tr|G4VIN8|G4VIN8_SCHMA Putative synaptojanin OS=Schistosoma mansoni GN=Smp_159670 PE=4 SV=1	4	126.06	0.353633	0.451447	-0.527426	1.44135	FALSE	14.7587547091006	15.0441749626628	16.5562232691623	16.4469266465946	15.5324262097703	15.9620771571228
G4VIQ4	tr|G4VIQ4|G4VIQ4_SCHMA Phosphodiesterase OS=Schistosoma mansoni GN=Smp_135500 PE=3 SV=1	12	100.82	0.488905	0.310775	0.221003	1.16554	FALSE	18.8832601694744	18.8461230049549	18.8665847503247	19.1322701184664	18.037156028476	18.7635320834476
G4VIW7	tr|G4VIW7|G4VIW7_SCHMA Putative heterogeneous nuclear ribonucleoprotein OS=Schistosoma mansoni GN=Smp_043100 PE=4 SV=1	3	28.65	0.00788203	2.10336	0.836419	1.78561	FALSE	21.2683838353823	20.7314366224388	20.9806730718821	20.0879911657578	20.3825329507715	20.000710999516
G4VIW9	tr|G4VIW9|G4VIW9_SCHMA Putative universal stress protein OS=Schistosoma mansoni GN=Smp_043120 PE=4 SV=1	8	17.97	0.0558337	1.2531	-0.362286	1.28546	FALSE	26.0994045510433	26.2727849000241	26.2831881432387	26.6219812253746	26.5341862743684	26.5860668884439
G4VIX0	tr|G4VIX0|G4VIX0_SCHMA Uncharacterized protein Smp_202690 OS=Schistosoma mansoni GN=Smp_202690 PE=4 SV=1	6	15.25	0.0111202	1.95389	-0.701331	1.626	FALSE	24.3585187737415	24.3059943690931	23.9299109817297	24.8613885722798	25.0598907194344	24.7771365976275
G4VIX7	tr|G4VIX7|G4VIX7_SCHMA Putative tetraspanin OS=Schistosoma mansoni GN=Smp_043210 PE=3 SV=1	1	32.451	0.213007	0.671607	-1.52087	2.86964	FALSE	14.2283307302282	18.1516040087883	18.1354941532619	18.0553374097646	18.2418655846083	18.7808381516377
G4VIY9	tr|G4VIY9|G4VIY9_SCHMA UDP-n-acetylglucosamine pyrophosphorylase OS=Schistosoma mansoni GN=Smp_043350 PE=4 SV=1	2	55.297	0.0373599	1.42759	-1.15803	2.23153	FALSE	15.8643799322018	17.5721176491675	16.5094062629435	17.8965089907649	17.6919511225928	17.8315445793063
G4VIZ2	tr|G4VIZ2|G4VIZ2_SCHMA Uncharacterized protein OS=Schistosoma mansoni GN=Smp_053700 PE=4 SV=1	1	9.1987	0.406373	0.391075	-0.327858	1.25515	FALSE	20.8517480410435	19.5751501730584	19.9475708374122	20.7616151636965	20.3976162054751	20.1988117801382
G4VIZ9	tr|G4VIZ9|G4VIZ9_SCHMA Seryl-tRNA synthetase OS=Schistosoma mansoni GN=Smp_053610 PE=4 SV=1	27	70.651	0.130113	0.88568	-0.755891	1.68867	FALSE	21.5787409228779	20.9533470917444	22.5007642139849	22.8403630183967	22.1262798657158	22.3338813380096
G4VJ06	tr|G4VJ06|G4VJ06_SCHMA Serine/threonine kinase OS=Schistosoma mansoni GN=Smp_053560 PE=3 SV=1	3	40.984	0.00900111	2.0457	0.698102	1.62237	FALSE	19.5164577535632	19.3894033037841	19.0707046909715	18.6382077211719	18.6996878396283	18.5443645981284
G4VJ08	tr|G4VJ08|G4VJ08_SCHMA Acyl-CoA thioesterase-related OS=Schistosoma mansoni GN=Smp_150820 PE=4 SV=1	7	52.882	0.977907	0.00970239	-0.0056741	1.00394	FALSE	21.0085951415841	20.6568197702389	20.5871476341197	20.6334016460277	20.9539197272583	20.6822634733636
G4VJ11;G4VJ12	tr|G4VJ11|G4VJ11_SCHMA Putative aspartyl-tRNA synthetase OS=Schistosoma mansoni GN=Smp_053510.1 PE=3 SV=1;tr|G4VJ12|G4VJ12_SCHMA Putative aspartyl-tRNA synthetase OS=Schistosoma mansoni GN=Smp_053510.2 PE=4 SV=1	16	60.14	0.0428186	1.36837	-0.499594	1.41382	FALSE	20.973177636254	21.0394482575365	20.5301033068267	21.3067406033129	21.3741020119561	21.3606682589117
G4VJ23;G4VJ22	tr|G4VJ23|G4VJ23_SCHMA Putative oxysterol-binding protein 1 OS=Schistosoma mansoni GN=Smp_058980.2 PE=4 SV=1;tr|G4VJ22|G4VJ22_SCHMA Putative oxysterol-binding protein 1 OS=Schistosoma mansoni GN=Smp_058980.1 PE=4 SV=1	8	100.02	0.0726092	1.13901	-0.786612	1.72502	FALSE	18.7418558316202	17.5811301046258	18.5667398661258	19.225567268808	18.7166425203816	19.3073512902516
G4VJ43	tr|G4VJ43|G4VJ43_SCHMA MICOS complex subunit MIC60 OS=Schistosoma mansoni GN=Smp_059150 PE=3 SV=1	19	85.58	0.00774719	2.11086	-0.817	1.76174	FALSE	20.9232736212554	21.27982745771	20.6977812160151	21.7861567449036	21.6595188621485	21.9062070130528
G4VJ46;G4VJ45	tr|G4VJ46|G4VJ46_SCHMA Putative troponin I OS=Schistosoma mansoni GN=Smp_059170.1 PE=4 SV=1;tr|G4VJ45|G4VJ45_SCHMA Putative troponin I OS=Schistosoma mansoni GN=Smp_059170.2 PE=4 SV=1	1	32.374	0.00588806	2.23003	-1.96899	3.91493	TRUE	14.2283307302282	14.5011210631332	15.9270209671219	16.5411001988326	17.020231024566	17.0021042348159
G4VJ55	tr|G4VJ55|G4VJ55_SCHMA Uncharacterized protein OS=Schistosoma mansoni GN=Smp_153990 PE=4 SV=1	6	68.697	0.318241	0.497243	-0.303327	1.23399	FALSE	18.0842461319838	18.3367710004642	18.426703632407	18.3918006153504	19.1258424604404	18.2400579048775
G4VJ60	tr|G4VJ60|G4VJ60_SCHMA Putative 4-hydroxyphenylpyruvate dioxygenase OS=Schistosoma mansoni GN=Smp_007960 PE=4 SV=1	2	38.923	0.0042069	2.37604	-2.13898	4.40452	TRUE	14.2283307302282	14.5011210631332	14.4707619788912	17.6248862617484	15.8469635152609	16.1453137264567
G4VJ72	tr|G4VJ72|G4VJ72_SCHMA Xaa-Pro dipeptidase (M24 family) OS=Schistosoma mansoni GN=Smp_090800 PE=3 SV=1	5	49.086	0.10841	0.96493	-0.430217	1.34744	FALSE	17.8124311519242	18.5183003920875	18.0270748190828	18.575811184034	18.6342458167374	18.438400599589
G4VJ73	tr|G4VJ73|G4VJ73_SCHMA Putative xaa-pro dipeptidase pepd/pepq OS=Schistosoma mansoni GN=Smp_114900 PE=4 SV=1	1	6.1321	0.437158	0.359362	-0.182284	1.13468	FALSE	20.2724689743467	19.7297689503283	19.9870198785443	20.4201343689581	20.1308615621353	19.985114144465
G4VJ77	tr|G4VJ77|G4VJ77_SCHMA Uncharacterized protein OS=Schistosoma mansoni GN=Smp_171780 PE=4 SV=1	6	29.12	0.0362793	1.44034	0.653572	1.57306	FALSE	22.8957496990425	22.8218726632869	22.8295572765142	21.75652575642	22.2514026096929	22.5785364518658
G4VJ99	tr|G4VJ99|G4VJ99_SCHMA Putative heat shock protein OS=Schistosoma mansoni GN=Smp_155740 PE=3 SV=1	10	80.755	0.700384	0.154664	-0.0657357	1.04662	FALSE	20.3432023705422	20.0369458338087	20.1498134949644	20.2031121333627	20.2261337555359	20.2979227713077
G4VJC3	tr|G4VJC3|G4VJC3_SCHMA Uncharacterized protein OS=Schistosoma mansoni GN=Smp_198150 PE=4 SV=1	1	7.4515	0.22535	0.647143	1.96892	3.91475	FALSE	19.94007147579	19.8673880459925	20.5333491945285	14.6259766897051	20.0002309155268	19.8078410801424
G4VJC6	tr|G4VJC6|G4VJC6_SCHMA Putative rhoptry associated membrane antigen OS=Schistosoma mansoni GN=Smp_070020 PE=4 SV=1	24	97.905	0.00202947	2.69262	-1.11273	2.16254	TRUE	20.7510361838737	20.8306283309892	20.2300195663008	21.6546614564935	21.807374556416	21.6878247509089
G4VJD5	tr|G4VJD5|G4VJD5_SCHMA Phosphoglycerate mutase OS=Schistosoma mansoni GN=Smp_096760 PE=3 SV=1	15	28.425	0.925646	0.033555	0.0163573	1.0114	FALSE	26.6143062063519	26.3806006303877	26.4001564047418	26.4752813733603	26.5654869503828	26.305222951544
G4VJD7	tr|G4VJD7|G4VJD7_SCHMA Uncharacterized protein OS=Schistosoma mansoni GN=Smp_096750 PE=3 SV=1	8	17.089	0.553822	0.25663	-0.200371	1.14899	FALSE	22.7725196198576	21.7100481642798	22.583555951623	22.7735534706633	22.5414251557854	22.3522570435397
G4VJD9	tr|G4VJD9|G4VJD9_SCHMA Enhancer of rudimentary homolog OS=Schistosoma mansoni GN=Smp_175210 PE=3 SV=1	2	12.028	0.867346	0.0618076	-0.0576445	1.04077	FALSE	21.182727906268	20.7000451960945	19.995341014289	20.6390253437729	20.5060252711484	20.9059969591751
G4VJE7	tr|G4VJE7|G4VJE7_SCHMA Uncharacterized protein OS=Schistosoma mansoni GN=Smp_042400 PE=4 SV=1	7	21.014	0.519764	0.284194	-0.138247	1.10057	FALSE	23.0074926520068	23.1013679256787	22.5708524770913	22.9386026545096	23.1441093751962	23.0117413027209
G4VJG1	tr|G4VJG1|G4VJG1_SCHMA Putative atp-dependent RNA helicase OS=Schistosoma mansoni GN=Smp_087270 PE=4 SV=1	1	85.423	0.901943	0.0448207	-0.0450421	1.03171	FALSE	15.4472788572385	14.5011210631332	14.4707619788912	14.6836253318859	14.5758833709606	15.2947796356326
G4VJG3	tr|G4VJG3|G4VJG3_SCHMA Putative crp1/csrp1/crip1 OS=Schistosoma mansoni GN=Smp_087250 PE=4 SV=1	8	19.956	0.112818	0.947623	0.311701	1.24117	FALSE	26.0648905088143	25.9317337801982	25.7084883694022	25.6303314510232	25.5867666476478	25.5529109141292
G4VJH0	tr|G4VJH0|G4VJH0_SCHMA Palmitoyltransferase OS=Schistosoma mansoni GN=Smp_169610 PE=3 SV=1	2	38.114	0.124729	0.904032	0.523387	1.43733	FALSE	17.5133443764557	17.510366379668	17.353715541885	17.2546230349357	16.3192661509002	17.2333765397859
G4VJI2	tr|G4VJI2|G4VJI2_SCHMA Uncharacterized protein OS=Schistosoma mansoni GN=Smp_166170 PE=4 SV=1	9	46.42	0.00235511	2.62799	0.936446	1.91381	FALSE	21.8014632161812	22.2843315972457	21.9588102344822	21.0393155578614	21.1068387911505	21.0891125057913
G4VJJ1;G4VJJ2;G4VJJ0	tr|G4VJJ1|G4VJJ1_SCHMA Putative heat shock protein 70 (Hsp70)-interacting protein OS=Schistosoma mansoni GN=Smp_062420.3 PE=4 SV=1;tr|G4VJJ2|G4VJJ2_SCHMA Putative heat shock protein 70 (Hsp70)-interacting protein OS=Schistosoma mansoni GN=Smp_062420.1 PE=4	14	40.422	0.416305	0.380588	-0.168859	1.12417	FALSE	24.2127701153758	24.3900193538935	24.4187012959476	24.2353411176533	24.727839329887	24.5648875156369
G4VJJ9;G4VJJ8	tr|G4VJJ9|G4VJJ9_SCHMA Putative ral OS=Schistosoma mansoni GN=Smp_062510.1 PE=4 SV=1;tr|G4VJJ8|G4VJJ8_SCHMA Putative ral OS=Schistosoma mansoni GN=Smp_062510.2 PE=4 SV=1	4	22.394	0.095912	1.01813	0.51389	1.4279	FALSE	20.3242119177161	20.5200473860728	19.8052555357463	19.3878109018105	19.8877307511075	19.83230276188
G4VJK0	tr|G4VJK0|G4VJK0_SCHMA N-terminal acetlytransferase-related OS=Schistosoma mansoni GN=Smp_062520 PE=4 SV=1	9	109.67	0.0839116	1.07618	-0.870822	1.8287	FALSE	17.2794916651909	17.8657438871321	16.3355716813867	18.0807876804076	18.3272534162324	17.6852321556049
G4VJK6	tr|G4VJK6|G4VJK6_SCHMA Putative beta-1,4-galactosyltransferase OS=Schistosoma mansoni GN=Smp_210280 PE=4 SV=1	4	20.348	0.0577389	1.23853	1.03265	2.04578	FALSE	18.6547233709184	20.0328781650472	19.8260172127776	18.9870405034432	18.3812740274821	18.0473420848498
G4VJL0	tr|G4VJL0|G4VJL0_SCHMA Putative dynactin subunit OS=Schistosoma mansoni GN=Smp_062630 PE=4 SV=1	14	46.17	0.120791	0.917965	-0.649562	1.56869	FALSE	19.7955788360072	20.2145372537033	21.1207750435971	20.8331886074853	21.1212509524051	21.1251360736819
G4VJL6	tr|G4VJL6|G4VJL6_SCHMA Putative clasp2 protein OS=Schistosoma mansoni GN=Smp_165350 PE=4 SV=1	10	129.1	0.125489	0.901393	0.815183	1.75952	FALSE	18.3322854692495	18.0831588703388	19.4763076271982	18.214697866671	17.1951328496836	18.0363732933064
G4VJL7	tr|G4VJL7|G4VJL7_SCHMA Putative lipid-binding protein OS=Schistosoma mansoni GN=Smp_080210 PE=4 SV=1	4	38.488	0.261519	0.582497	0.377224	1.29884	FALSE	17.9511235275997	17.727661752038	17.8313838044252	17.9898121212138	17.5099398592801	16.8787442798258
G4VJM9	tr|G4VJM9|G4VJM9_SCHMA Putative synaptophysin/synaptoporin OS=Schistosoma mansoni GN=Smp_080100 PE=4 SV=1	1	25.936	0.00018481	3.73327	5.2742	38.6985	TRUE	19.8670036300757	18.3749705458903	21.0116224950997	14.6259766897051	14.2728824249109	14.5321256808221
G4VJN6	tr|G4VJN6|G4VJN6_SCHMA Uncharacterized protein OS=Schistosoma mansoni GN=Smp_015980 PE=4 SV=1	4	10.19	0.000890177	3.05052	-1.42221	2.67996	TRUE	22.1286724439371	21.9338639361465	21.4815158232404	23.0981349239715	23.4927560643403	23.2197995468401
G4VJN9	tr|G4VJN9|G4VJN9_SCHMA Putative 40s ribosomal protein S15 OS=Schistosoma mansoni GN=Smp_130850 PE=3 SV=1	1	16.833	0.839295	0.0760852	-0.0630893	1.0447	FALSE	20.589867703969	19.9333378913663	20.6538136357536	20.8829981529191	20.1440637441162	20.3392253188361
G4VJP0	tr|G4VJP0|G4VJP0_SCHMA Putative beta-1,4-galactosyltransferase OS=Schistosoma mansoni GN=Smp_015920 PE=4 SV=1	1	40.284	0.543374	0.264901	-0.327369	1.25472	FALSE	18.1914458705583	16.7033791384089	16.2159329079101	17.3839662066143	17.4388704960045	17.2700267807126
G4VJP7	tr|G4VJP7|G4VJP7_SCHMA T-complex protein 1 subunit gamma OS=Schistosoma mansoni GN=Smp_041740 PE=3 SV=1	24	60.138	0.974805	0.0110821	-0.0162863	1.01135	FALSE	23.7608731580085	22.241190124551	23.8588191371199	23.7497160363889	22.8975263799865	23.262498967889
G4VJQ2	tr|G4VJQ2|G4VJQ2_SCHMA Putative collagen alpha-1(V) chain OS=Schistosoma mansoni GN=Smp_144910 PE=4 SV=1	3	92.481	0.185547	0.731547	-1.02775	2.03884	FALSE	17.644204626575	18.6143910530816	15.9843570268129	19.0044879020494	18.0177892869111	18.3039116423045
G4VJQ3	tr|G4VJQ3|G4VJQ3_SCHMA Uncharacterized protein OS=Schistosoma mansoni GN=Smp_144920 PE=4 SV=1	4	24.891	0.418479	0.378326	-0.176932	1.13048	FALSE	19.4602631221308	19.4413236015356	19.0615160548224	19.484628640382	19.2974533778323	19.7118162731902
G4VJQ6	tr|G4VJQ6|G4VJQ6_SCHMA Putative cellular nucleic acid binding protein OS=Schistosoma mansoni GN=Smp_179300.1 PE=4 SV=1	4	15.853	0.915037	0.0385613	-0.02678	1.01874	FALSE	22.6355763932324	23.2586431313288	23.278125639855	22.8896319840175	23.2552944705964	23.1077586828691
G4VJQ8	tr|G4VJQ8|G4VJQ8_SCHMA Putative cellular nucleic acid binding protein OS=Schistosoma mansoni GN=Smp_179300.3 PE=4 SV=1	1	18.887	0.208785	0.6803	-0.24667	1.18647	FALSE	22.4862189523093	22.7916472037567	22.6016430553286	22.741301214136	23.0303979855449	22.8478208279763
G4VJS1	tr|G4VJS1|G4VJS1_SCHMA Putative 60s acidic ribosomal protein P1 OS=Schistosoma mansoni GN=Smp_041980 PE=3 SV=1	1	11.941	0.227229	0.643537	-1.96954	3.91644	FALSE	14.2283307302282	19.6523832163332	19.4449158882428	19.5628864898601	20.0634900408429	19.6078792003528
G4VJS7	tr|G4VJS7|G4VJS7_SCHMA Uncharacterized protein OS=Schistosoma mansoni GN=Smp_042060 PE=4 SV=1	7	31.074	0.00193758	2.71274	1.13769	2.20028	TRUE	20.8897027208628	20.4069516353073	21.0677555795098	19.6281403302161	19.6932323719853	19.6299808667508
G4VJT2;G4VJT1	tr|G4VJT2|G4VJT2_SCHMA Putative 60s ribosomal protein L10a OS=Schistosoma mansoni GN=Smp_042090.1 PE=4 SV=1;tr|G4VJT1|G4VJT1_SCHMA Putative 60s ribosomal protein L10a OS=Schistosoma mansoni GN=Smp_042090.3 PE=4 SV=1	4	24.885	0.770336	0.11332	0.204258	1.15209	FALSE	20.5692365636572	19.4831680382731	21.1734760462551	21.1164115901384	19.0027562100869	20.4939373659496
G4VJT4	tr|G4VJT4|G4VJT4_SCHMA Uncharacterized protein OS=Schistosoma mansoni GN=Smp_042110.1 PE=4 SV=1	2	22.254	0.322238	0.491823	-0.449991	1.36603	FALSE	18.5694452910163	18.139632355689	18.6143764008776	17.9828215422685	19.3175537581442	19.3730527319999
G4VJT8;A0A223A3K1	tr|G4VJT8|G4VJT8_SCHMA Putative dynein light chain 1, cytoplasmic OS=Schistosoma mansoni GN=SmTAL13 PE=2 SV=1;tr|A0A223A3K1|A0A223A3K1_SCHMA TAL13 OS=Schistosoma mansoni PE=2 SV=1	5	21.099	6.32845e-09	8.1987	8.81299	449.752	TRUE	23.4898826548969	23.1673545618899	23.2127091878028	14.6259766897051	14.2728824249109	14.5321256808221
G4VJU8	tr|G4VJU8|G4VJU8_SCHMA Uncharacterized protein OS=Schistosoma mansoni GN=Smp_078710 PE=4 SV=1	1	89.798	0.939451	0.0271257	-0.0288135	1.02017	FALSE	14.2283307302282	14.5686923150342	14.4707619788912	13.6966857494952	14.6203947014571	15.037145144469
G4VJV1	tr|G4VJV1|G4VJV1_SCHMA Putative microsomal signal peptidase 23 kD subunit (Spc22/23) OS=Schistosoma mansoni GN=Smp_175420 PE=4 SV=1	1	20.339	0.110842	0.955295	-0.486254	1.4008	FALSE	19.4126401572047	19.6990309278856	18.8766826470504	20.0350564628002	19.7311987101639	19.6808610283802
G4VJV2	tr|G4VJV2|G4VJV2_SCHMA Putative dna repair protein xp-E OS=Schistosoma mansoni GN=Smp_175430 PE=4 SV=1	14	146.58	0.922501	0.0350333	-0.0375216	1.02635	FALSE	17.1113980983683	18.3218782616588	18.2351864511278	17.6478587635833	17.9839798235336	18.1491890475058
G4VJV5	tr|G4VJV5|G4VJV5_SCHMA Uncharacterized protein OS=Schistosoma mansoni GN=Smp_175460 PE=4 SV=1	5	151.37	0.958534	0.0183925	-0.132959	1.09654	FALSE	16.1011656563321	22.6955262187203	22.4346564015934	16.3893148166895	22.4981688447322	22.7427430867444
G4VJV7;G4VJV6	tr|G4VJV7|G4VJV7_SCHMA Putative fbxl20 OS=Schistosoma mansoni GN=Smp_097020.2 PE=4 SV=1;tr|G4VJV6|G4VJV6_SCHMA Putative fbxl20 OS=Schistosoma mansoni GN=Smp_097020.1 PE=4 SV=1	4	57.147	0.021949	1.65859	-1.32571	2.50656	FALSE	17.0572229582172	15.9199447182167	17.2526708759074	17.7249237162484	18.6099236771995	17.8721233639332
G4VJX1	tr|G4VJX1|G4VJX1_SCHMA Uncharacterized protein OS=Schistosoma mansoni GN=Smp_136320 PE=4 SV=1	3	17.062	0.759295	0.119589	-0.23306	1.17532	FALSE	20.6775066017259	20.0887146878462	17.9516252950487	20.1380499934248	19.2706407361548	20.0083348331403
G4VJX4	tr|G4VJX4|G4VJX4_SCHMA Putative tropomodulin OS=Schistosoma mansoni GN=Smp_003710 PE=4 SV=1	10	40.467	0.817388	0.0875719	-0.0510957	1.03605	FALSE	22.3409255557862	21.9940658685979	22.4838769838423	22.2507661734441	22.1575380593329	22.5638512504107
G4VJX8	tr|G4VJX8|G4VJX8_SCHMA Putative mitochondrial ATP synthase B chain OS=Schistosoma mansoni GN=Smp_154530 PE=4 SV=1	12	34.67	0.0065984	2.18056	-0.949749	1.93154	FALSE	21.2768912099262	21.439442128592	21.9026973931728	22.4523387904501	22.2955648004024	22.720374223548
G4VJY2;G4VJY4;G4VJY3;G4VJY5	tr|G4VJY2|G4VJY2_SCHMA Putative suppressor of actin (Sac) OS=Schistosoma mansoni GN=Smp_060420.5 PE=4 SV=1;tr|G4VJY4|G4VJY4_SCHMA Putative suppressor of actin (Sac) OS=Schistosoma mansoni GN=Smp_060420.1 PE=4 SV=1;tr|G4VJY3|G4VJY3_SCHMA Putative suppressor	9	70.786	0.384768	0.414801	0.443722	1.36011	FALSE	18.5599270404557	17.1408280254416	18.727204538319	18.1228866019624	17.3524537847743	17.6214527677205
G4VJY6	tr|G4VJY6|G4VJY6_SCHMA Putative rab 3 and OS=Schistosoma mansoni GN=Smp_154580 PE=4 SV=1	3	19.717	0.0310322	1.50819	0.970681	1.95977	FALSE	21.6384280621372	20.8919169591017	21.3428880791798	19.954848251645	20.9538503118547	20.0524917401438
G4VJY9	tr|G4VJY9|G4VJY9_SCHMA Nucleoside diphosphate kinase OS=Schistosoma mansoni GN=Smp_092750 PE=1 SV=1	8	16.85	0.594659	0.225732	-0.129933	1.09424	FALSE	25.6240445064585	25.4766501324118	25.0058104947655	25.5725337875986	25.6598646503916	25.2639046468319
G4VK07	tr|G4VK07|G4VK07_SCHMA Uncharacterized protein OS=Schistosoma mansoni GN=Smp_053030 PE=4 SV=1	4	49.402	0.913634	0.0392277	-0.0767934	1.05467	FALSE	16.502541418416	18.1827608846092	16.6631373333503	15.9734823393495	17.8220139592924	17.7833234600938
G4VK08	tr|G4VK08|G4VK08_SCHMA Snf7-related OS=Schistosoma mansoni GN=Smp_053040 PE=3 SV=1	2	23.627	0.483045	0.316012	-0.343135	1.26851	FALSE	18.9429742541947	17.824074707831	19.0561946845808	19.4026515827639	19.2107398081576	18.2392577729166
G4VK20;G4VK21	tr|G4VK20|G4VK20_SCHMA Cell polarity protein OS=Schistosoma mansoni GN=Smp_153310.1 PE=4 SV=1;tr|G4VK21|G4VK21_SCHMA Cell polarity protein OS=Schistosoma mansoni GN=Smp_153310.2 PE=4 SV=1	18	85.843	0.0745679	1.12745	-0.494072	1.40841	FALSE	23.2396679867317	23.0807818089337	22.957300586418	23.9244764655388	23.2242645136806	23.6112256841194
G4VK22	tr|G4VK22|G4VK22_SCHMA Uncharacterized protein OS=Schistosoma mansoni GN=Smp_153320 PE=4 SV=1	2	6.2611	0.30962	0.509171	0.261464	1.19869	FALSE	22.6498235677666	22.7960887902721	22.5553194667571	22.6492067201211	22.5957309280341	21.9719007035218
G4VK26	tr|G4VK26|G4VK26_SCHMA Putative ribonuclease z, chloroplast OS=Schistosoma mansoni GN=Smp_153350 PE=4 SV=1	4	21.783	0.140642	0.851886	1.10518	2.15125	FALSE	18.7394630504814	17.5444664527437	18.6177059193938	18.1337559332171	15.8797905420077	17.5725593007977
G4VK35	tr|G4VK35|G4VK35_SCHMA Putative serine/threonine protein phosphatase 2a regulatory subunit A OS=Schistosoma mansoni GN=Smp_153410 PE=4 SV=1	4	91.411	0.873939	0.0585189	-0.0573468	1.04055	FALSE	17.3183979531686	16.9536192726792	16.1051464074788	16.8777891130352	16.5955796615659	17.0758352627994
G4VK43;G4VK42;G4VK44;G4VK45	tr|G4VK43|G4VK43_SCHMA Uncharacterized protein OS=Schistosoma mansoni GN=Smp_058140.4 PE=4 SV=1;tr|G4VK42|G4VK42_SCHMA Protein-L-isoaspartate O-methyltransferase OS=Schistosoma mansoni GN=Smp_058140.1 PE=3 SV=1;tr|G4VK44|G4VK44_SCHMA Protein-L-isoaspartate	7	22.106	0.00286742	2.54251	-0.912147	1.88184	FALSE	21.2458251606249	21.3888247315343	21.1116429615047	22.2801171952899	22.2916154398028	21.9109999247209
G4VK46	tr|G4VK46|G4VK46_SCHMA Uncharacterized protein OS=Schistosoma mansoni GN=Smp_058150.1 PE=4 SV=1	7	25.596	0.00125157	2.90255	-1.01339	2.01865	TRUE	20.9375304200477	21.1491255204762	21.0803623076824	22.0145367493938	21.9104071098772	22.2822398993001
G4VK53	tr|G4VK53|G4VK53_SCHMA Putative nadh-ubiquinone oxidoreductase 24 kD subunit OS=Schistosoma mansoni GN=Smp_069770 PE=4 SV=1	8	27.432	0.0864582	1.06319	-0.378369	1.29987	FALSE	21.5438226116411	21.5493820968128	21.3057039135398	21.647338732924	22.05257589215	21.8341018501894
G4VK63	tr|G4VK63|G4VK63_SCHMA Putative small nuclear ribonucleoprotein U1a,U2b OS=Schistosoma mansoni GN=Smp_069870 PE=4 SV=1	6	34.505	0.065876	1.18127	0.469997	1.38511	FALSE	21.2198893137082	21.2640713237745	21.4283500033109	20.8770038220213	21.1134415259748	20.5118740630075
G4VK64	tr|G4VK64|G4VK64_SCHMA Putative small nuclear ribonucleoprotein U1a,U2b OS=Schistosoma mansoni GN=Smp_069880 PE=4 SV=1	3	25.33	0.692575	0.159533	0.200989	1.14949	FALSE	17.092614517592	18.3825714294806	16.8088594047005	17.677237329055	17.3247218823572	16.6791201010871
G4VK76	tr|G4VK76|G4VK76_SCHMA Rho GDP-dissociation inhibitor-related OS=Schistosoma mansoni GN=Smp_045610 PE=4 SV=1	13	22.969	0.495163	0.305252	-0.116984	1.08447	FALSE	22.9686167445298	22.9176062134937	22.9111241114789	23.1754070419857	23.0917765867442	22.8811155056774
G4VK82	tr|G4VK82|G4VK82_SCHMA Uncharacterized protein OS=Schistosoma mansoni GN=Smp_146720 PE=4 SV=1	12	247.83	0.00445018	2.35162	-0.941084	1.91997	FALSE	17.1736324503325	17.1264141677293	17.0738567826289	18.1872947545887	17.6944792492049	18.3153815402651
G4VK88;G4VK89	tr|G4VK88|G4VK88_SCHMA Snf7-related OS=Schistosoma mansoni GN=Smp_045710.2 PE=3 SV=1;tr|G4VK89|G4VK89_SCHMA Snf7-related OS=Schistosoma mansoni GN=Smp_045710.1 PE=3 SV=1	4	24.538	0.789335	0.102739	0.0445229	1.03134	FALSE	20.5849956288018	20.574929036479	20.6680960252389	20.6109073208438	20.6731175036867	20.4104272324023
G4VK91	tr|G4VK91|G4VK91_SCHMA Putative calbindin-32 OS=Schistosoma mansoni GN=Smp_146280 PE=4 SV=1	2	42.784	0.00152487	2.81677	-1.39973	2.63851	TRUE	14.9892260344096	15.6092000391396	15.443493218243	16.9845723651483	16.3991750333317	16.8573501799217
G4VKA2	tr|G4VKA2|G4VKA2_SCHMA Cytidylate kinase OS=Schistosoma mansoni GN=Smp_043620 PE=3 SV=1	7	14.44	0.323607	0.489982	0.329378	1.25647	FALSE	23.5290689158536	23.2307353868488	23.1422431448553	23.148480756568	23.3963141916533	22.3691178003862
G4VKA6;G4VKA5;Q27778	tr|G4VKA6|G4VKA6_SCHMA ATP-dependent 6-phosphofructokinase OS=Schistosoma mansoni GN=Smp_043670.1 PE=3 SV=1;tr|G4VKA5|G4VKA5_SCHMA ATP-dependent 6-phosphofructokinase OS=Schistosoma mansoni GN=Smp_043670.2 PE=3 SV=1;sp|Q27778|PFKA_SCHMA ATP-dependent 6-pho	34	87.45	0.05285	1.27696	-0.476267	1.39114	FALSE	24.1380580768494	24.2193380041604	23.7085444541124	24.5392342129321	24.3971440421454	24.5583628129056
G4VKA7	tr|G4VKA7|G4VKA7_SCHMA Putative ankyrin 2,3/unc44 OS=Schistosoma mansoni GN=Smp_145700 PE=4 SV=1	49	217.68	0.11095	0.954873	-0.422809	1.34053	FALSE	21.2732263710539	20.8479360918645	21.2195417941886	21.8027916494714	21.2292342276254	21.5771047955304
G4VKA9	tr|G4VKA9|G4VKA9_SCHMA Nardilysin (M16 family) OS=Schistosoma mansoni GN=Smp_156960.2 PE=4 SV=1	9	94.22	0.000133015	3.8761	4.54446	23.3355	TRUE	19.2875880076402	19.1393332833521	18.61134637389	14.6259766897051	13.3899937321828	15.3889265189532
G4VKB2	tr|G4VKB2|G4VKB2_SCHMA Uncharacterized protein OS=Schistosoma mansoni GN=Smp_156940 PE=4 SV=1	3	63.231	0.0637025	1.19584	-1.08674	2.12394	FALSE	15.1100630035245	16.1275725906819	16.5373841870129	16.3945920287479	16.9897874109693	17.6508611000409
G4VKB4	tr|G4VKB4|G4VKB4_SCHMA Uncharacterized protein OS=Schistosoma mansoni GN=Smp_064530 PE=4 SV=1	5	32.186	0.152461	0.81684	0.307237	1.23734	FALSE	19.7062655947073	19.9672306624907	20.0352832240956	19.7391675755303	19.3839762644957	19.6639244804275
G4VKC0;G4VKB9	tr|G4VKC0|G4VKC0_SCHMA Uncharacterized protein OS=Schistosoma mansoni GN=Smp_156910.2 PE=4 SV=1;tr|G4VKB9|G4VKB9_SCHMA Uncharacterized protein OS=Schistosoma mansoni GN=Smp_156910.1 PE=4 SV=1	33	138.75	0.0172842	1.76235	0.664394	1.5849	FALSE	22.3458356587297	22.7383152130222	22.1463397105814	21.8066780262057	21.7301209926129	21.7005106922695
G4VKC4	tr|G4VKC4|G4VKC4_SCHMA Uncharacterized protein OS=Schistosoma mansoni GN=Smp_064430 PE=4 SV=1	5	20.077	0.316742	0.499295	-0.21908	1.16399	FALSE	23.7076670545994	23.6566630492522	23.1873059931224	23.6531917881955	23.8021595614274	23.7535236342955
G4VKC5	tr|G4VKC5|G4VKC5_SCHMA Sec24-related C, d OS=Schistosoma mansoni GN=Smp_156880 PE=4 SV=1	9	110.33	0.19402	0.712154	-0.348131	1.27291	FALSE	18.5038843067618	18.7608575520524	18.1275695910994	19.0697852017069	18.7860340475652	18.5808843046903
G4VKC8	tr|G4VKC8|G4VKC8_SCHMA Aspartate aminotransferase OS=Schistosoma mansoni GN=Smp_064380 PE=4 SV=1	15	42.845	0.496276	0.304277	-0.144487	1.10534	FALSE	22.5525117594197	22.3225369964498	22.7568557052495	22.4614117422029	22.8183012896182	22.7856511858274
G4VKD0	tr|G4VKD0|G4VKD0_SCHMA Putative rna and export factor binding protein OS=Schistosoma mansoni GN=Smp_064360 PE=4 SV=1	3	35.951	0.487757	0.311797	0.75141	1.68344	FALSE	17.1382531629161	15.9814624949074	18.9983536871747	18.3213957645108	15.5272106562481	16.0152332312834
G4VKD4;G4VKD5	tr|G4VKD4|G4VKD4_SCHMA 26S proteasome subunit P28-related OS=Schistosoma mansoni GN=Smp_064320.2 PE=4 SV=1;tr|G4VKD5|G4VKD5_SCHMA 26S proteasome subunit P28-related OS=Schistosoma mansoni GN=Smp_064320.1 PE=4 SV=1	3	18.33	0.0520282	1.28376	0.469722	1.38484	FALSE	21.1788777364323	21.092473662078	20.7757361452553	20.4089289142502	20.7469241161299	20.4820692057485
G4VKE4	tr|G4VKE4|G4VKE4_SCHMA Putative quinone oxidoreductase OS=Schistosoma mansoni GN=Smp_159230 PE=4 SV=1	17	46.742	0.710052	0.14871	0.113329	1.08172	FALSE	22.2278453726999	22.0846119664059	22.9416967537823	22.4575700456998	21.9871646795305	22.4694326162026
G4VKE8	tr|G4VKE8|G4VKE8_SCHMA Uncharacterized protein OS=Schistosoma mansoni GN=Smp_159200 PE=4 SV=1	2	159.98	0.261383	0.582722	-0.31227	1.24166	FALSE	15.119838947697	15.0355612201482	14.6130424389628	14.9814812425831	15.6266507839173	15.0971215357503
G4VKF3;G4VKF1;G4VKF2	tr|G4VKF3|G4VKF3_SCHMA Uncharacterized protein OS=Schistosoma mansoni GN=Smp_039490.1 PE=4 SV=1;tr|G4VKF1|G4VKF1_SCHMA Uncharacterized protein OS=Schistosoma mansoni GN=Smp_039490.2 PE=4 SV=1;tr|G4VKF2|G4VKF2_SCHMA Uncharacterized protein OS=Schistosoma ma	3	106.12	0.907487	0.0421594	0.0718287	1.05105	FALSE	16.2208995113126	14.5011210631332	14.9995276599313	16.1332917804658	14.7339242522676	14.6388460525113
G4VKF7	tr|G4VKF7|G4VKF7_SCHMA Putative laminin OS=Schistosoma mansoni GN=Smp_143680 PE=4 SV=1	63	337.5	0.00180975	2.74238	0.932282	1.90829	FALSE	20.3613982686725	20.3298943498225	20.6264332687053	19.5274119316048	19.3609594611241	19.6325077330063
G4VKI4	tr|G4VKI4|G4VKI4_SCHMA Uncharacterized protein OS=Schistosoma mansoni GN=Smp_040080 PE=4 SV=1	1	52.578	0.296189	0.528431	-0.303152	1.23384	FALSE	17.5300539536245	17.8257856047259	16.9641266970676	17.6775344812323	17.6100998756195	17.9417892071998
G4VKI9	tr|G4VKI9|G4VKI9_SCHMA Phosphatidate cytidylyltransferase OS=Schistosoma mansoni GN=Smp_144030 PE=3 SV=1	2	57.768	0.433828	0.362682	0.596613	1.51216	FALSE	16.4218122052386	14.8037615858628	17.3521540343506	15.6448486568811	14.855288132161	16.2877506210296
G4VKJ4	tr|G4VKJ4|G4VKJ4_SCHMA Putative cortactin OS=Schistosoma mansoni GN=Smp_210150 PE=4 SV=1	5	29.558	0.998948	0.000457156	0.000289146	1.0002	FALSE	19.7487088643065	19.6977316232002	19.6963339982979	19.4067541574034	20.0530296004129	19.6821232901987
G4VKK0	tr|G4VKK0|G4VKK0_SCHMA Putative beta-taxilin OS=Schistosoma mansoni GN=Smp_155180 PE=4 SV=1	2	23.122	0.434848	0.361663	-0.33377	1.2603	FALSE	18.2916422068146	18.2284666169304	18.6526014827961	19.5891853087864	18.2002447204348	18.3845911016538
G4VKL7	tr|G4VKL7|G4VKL7_SCHMA Uncharacterized protein OS=Schistosoma mansoni GN=Smp_169340 PE=4 SV=1	2	17.92	0.0628997	1.20135	-0.788567	1.72736	FALSE	17.8449609359896	17.8410930536687	18.0756389879709	19.1150096643943	19.0562403665868	17.9561440364221
[truncated: 610 more rows]
