# Supplementary material for: Evolution of gene dosage on the Z-chromosome of schistosome parasites
Source: eLife. 2018 Jul 25;7:e35684. doi: 10.7554/eLife.35684 (PMC6089595; doi:10.7554/eLife.35684)
Supplement: Figure 4—source data 3. [file elife-35684-fig4-data3.xlsx]

## Sheet: Figure 4-source data 3
Figure 4-source data 3: Proteomic data without imputed values - GONADS
Majority protein IDs	Fasta headers	Razor + unique peptides	Mol. Weight [kDa]	log2(FC) without imputation	Log2(iBAQ FG-G)	Log2(iBAQ FG-H)	Log2(iBAQ FG-B)	mean Log2(iBAQ F) without imputation	Log2(iBAQ MG-K_2)	Log2(iBAQ MG-M)	Log2(iBAQ MG-L)	mean Log2(iBAQ M) without imputation
A0A0R5RJE0;A0A146MG63;G4V9Z0;G4VCP4;O96413;Q6RYS0	tr|A0A0R5RJE0|A0A0R5RJE0_SCHMA Ubiquitin (Fragment) OS=Schistosoma mansoni PE=2 SV=1;tr|A0A146MG63|A0A146MG63_SCHMA Uncharacterized protein OS=Schistosoma mansoni GN=c12516_g1_i1 PE=4 SV=1;tr|G4V9Z0|G4V9Z0_SCHMA Putative ubiquitin (Ribosomal protein L40) O	8	17.111	-0.734533	24.9357	25.3682	24.8204	25.0414	25.8108	25.9499	25.5672	25.776
A0A146MG43	tr|A0A146MG43|A0A146MG43_SCHMA Uncharacterized protein OS=Schistosoma mansoni GN=c18731_g1_i1 PE=4 SV=1	3	9.6581	0.553948			19.3933	19.3933	19.1688	18.8248	18.5244	18.8393
A0A146MG57	tr|A0A146MG57|A0A146MG57_SCHMA Uncharacterized protein OS=Schistosoma mansoni GN=c12741_g1_i1 PE=4 SV=1	1	9.8203	0.333205	20.1738	20.4278	19.6779	20.0932	20.0678	19.2531	19.959	19.76
A0A146MG80	tr|A0A146MG80|A0A146MG80_SCHMA Uncharacterized protein OS=Schistosoma mansoni GN=c8380_g1_i4 PE=4 SV=1	5	5.1138	-0.918229	22.5182	22.6195	22.4102	22.516	23.4751	23.4026	23.4249	23.4342
A0A146MG97	tr|A0A146MG97|A0A146MG97_SCHMA Uncharacterized protein OS=Schistosoma mansoni GN=c7392_g1_i1 PE=4 SV=1	4	46.504	2.37764	18.0879	17.9175	17.771	17.9255	15.6119	15.857	15.1746	15.5478
A0A146MGA0	tr|A0A146MGA0|A0A146MGA0_SCHMA Uncharacterized protein OS=Schistosoma mansoni GN=c7489_g1_i1 PE=4 SV=1	6	39.502	-0.686749	20.2338	20.3156	20.3528	20.3008	21.0298	21.0947	20.8379	20.9875
A0A146MGA2	tr|A0A146MGA2|A0A146MGA2_SCHMA 60S ribosomal protein L18a OS=Schistosoma mansoni GN=c7587_g1_i1 PE=3 SV=1	4	21.123	0.391793	20.2973	20.0803	20.2188	20.1988	19.655	18.4321	21.334	19.8071
A0A146MGA3	tr|A0A146MGA3|A0A146MGA3_SCHMA Uncharacterized protein OS=Schistosoma mansoni GN=c7743_g1_i1 PE=4 SV=1	2	6.2422	2.7596	22.7227	22.8117	22.1255	22.5533	19.0407	19.8929	20.4475	19.7937
A0A146MGA5	tr|A0A146MGA5|A0A146MGA5_SCHMA Uncharacterized protein OS=Schistosoma mansoni GN=c6969_g1_i1 PE=4 SV=1	8	42.552	-0.522228	22.5249	22.0396	21.9062	22.1569	22.7806	22.5093	22.7475	22.6791
A0A146MGC1	tr|A0A146MGC1|A0A146MGC1_SCHMA Uncharacterized protein OS=Schistosoma mansoni GN=c6749_g1_i1 PE=4 SV=1	3	13.994	-0.292977	21.5087	21.8407	22.3888	21.9127	22.1243	21.6965	22.7963	22.2057
A0A146MGC6	tr|A0A146MGC6|A0A146MGC6_SCHMA Uncharacterized protein OS=Schistosoma mansoni GN=c6091_g2_i1 PE=4 SV=1	2	6.8459	0.27497	21.4626	21.7047	21.9177	21.695	21.6145	21.3917	21.2539	21.42
A0A146MGD1	tr|A0A146MGD1|A0A146MGD1_SCHMA Uncharacterized protein OS=Schistosoma mansoni GN=c6369_g1_i1 PE=3 SV=1	3	15.85	2.34822	19.52	18.8812	19.0598	19.1537		17.0297	16.5812	16.8055
A0A146MGD3	tr|A0A146MGD3|A0A146MGD3_SCHMA Uncharacterized protein OS=Schistosoma mansoni GN=c6164_g1_i2 PE=4 SV=1	2	7.2043	-0.176617	21.3289	21.0751	20.9056	21.1032	21.5223	21.4171	20.9	21.2798
A0A146MGD5	tr|A0A146MGD5|A0A146MGD5_SCHMA Uncharacterized protein OS=Schistosoma mansoni GN=c5016_g1_i1 PE=3 SV=1	4	7.6928	1.44471	25.5425	25.2762	24.9219	25.2469	23.7946	24.024	23.5879	23.8022
A0A146MGD6	tr|A0A146MGD6|A0A146MGD6_SCHMA Uncharacterized protein OS=Schistosoma mansoni GN=c5482_g1_i1 PE=4 SV=1	7	14.04	-0.235462	21.5605	21.5185	21.0641	21.3811	21.8367	21.3965	21.6163	21.6165
A0A146MGE6	tr|A0A146MGE6|A0A146MGE6_SCHMA Uncharacterized protein OS=Schistosoma mansoni GN=c4298_g1_i1 PE=4 SV=1	1	7.6088	-0.314056	21.1828	21.6363	21.7293	21.5161	21.4959	22.0293	21.9654	21.8302
A0A146MGF3	tr|A0A146MGF3|A0A146MGF3_SCHMA Uncharacterized protein OS=Schistosoma mansoni GN=c4561_g1_i1 PE=4 SV=1	2	17.239	-0.18696	18.2343	18.7185	18.5558	18.5029	18.5832	18.7964		18.6898
A0A146MGG9	tr|A0A146MGG9|A0A146MGG9_SCHMA Uncharacterized protein OS=Schistosoma mansoni GN=c2964_g1_i1 PE=4 SV=1	5	10.738	-1.38076	20.8177	19.9725	20.7611	20.5171	21.3925	22.0599	22.2411	21.8979
A0A146MGH8	tr|A0A146MGH8|A0A146MGH8_SCHMA Malic enzyme OS=Schistosoma mansoni GN=c1504_g1_i1 PE=3 SV=1	9	47.963	0.131795	19.5307	20.5025	20.9054	20.3129	20.2932	19.9133	20.3368	20.1811
A0A146MGS0	tr|A0A146MGS0|A0A146MGS0_SCHMA Uncharacterized protein OS=Schistosoma mansoni GN=c6943_g1_i1 PE=3 SV=1	4	14.295	0.481126	19.0867	19.7441	19.8467	19.5592	18.758	19.2542	19.2219	19.078
A0A146MGV3	tr|A0A146MGV3|A0A146MGV3_SCHMA Uncharacterized protein OS=Schistosoma mansoni GN=c4946_g1_i1 PE=4 SV=1	2	12.328	1.85325	18.7047	18.5559	18.0093	18.4233		16.5701		16.5701
A0A146MHE5;G4VRK0	tr|A0A146MHE5|A0A146MHE5_SCHMA Protein yippee-like OS=Schistosoma mansoni GN=c18726_g1_i1 PE=3 SV=1;tr|G4VRK0|G4VRK0_SCHMA Putative yippee protein OS=Schistosoma mansoni GN=Smp_171850 PE=4 SV=1	2	13.848	-1.50461	18.5299	18.6503	18.5201	18.5668	19.5416	20.2859	20.3866	20.0714
A0A146MHK8	tr|A0A146MHK8|A0A146MHK8_SCHMA Uncharacterized protein OS=Schistosoma mansoni GN=c8120_g1_i2 PE=4 SV=1	2	14.893	-1.86202	17.5464		18.1636	17.855	19.5257	19.4894	20.136	19.717
A0A146MHL9	tr|A0A146MHL9|A0A146MHL9_SCHMA Uncharacterized protein OS=Schistosoma mansoni GN=c7454_g2_i1 PE=4 SV=1	3	8.4437	-1.13773	20.5901	20.7558	20.6525	20.6661	22.2155	22.0486	21.1475	21.8038
A0A146MHN9	tr|A0A146MHN9|A0A146MHN9_SCHMA Uncharacterized protein OS=Schistosoma mansoni GN=c6528_g1_i1 PE=4 SV=1	2	9.0749	-1.45582	15.4168	16.5785		15.9976	15.791	16.5323	20.037	17.4535
A0A146MHS2	tr|A0A146MHS2|A0A146MHS2_SCHMA Uncharacterized protein OS=Schistosoma mansoni GN=c4297_g1_i1 PE=3 SV=1	4	14.625	0.256641	21.1719	21.1878	21.286	21.2153	21.2425	20.7292	20.9041	20.9586
A0A146MHV0;A0A146MGH5	tr|A0A146MHV0|A0A146MHV0_SCHMA MICOS complex subunit MIC10 OS=Schistosoma mansoni GN=c797_g1_i1 PE=3 SV=1;tr|A0A146MGH5|A0A146MGH5_SCHMA MICOS complex subunit MIC10 OS=Schistosoma mansoni GN=c797_g1_i2 PE=3 SV=1	6	9.8944	1.10738	22.8501	22.6651	22.841	22.7854	22.4166	21.2706	21.3468	21.678
A0A146MHY2	tr|A0A146MHY2|A0A146MHY2_SCHMA Uncharacterized protein OS=Schistosoma mansoni GN=c19920_g1_i1 PE=4 SV=1	2	17.11	-0.497928	18.216	17.7105	18.2124	18.0463	18.3585	18.7448	18.5294	18.5442
A0A146MI27	tr|A0A146MI27|A0A146MI27_SCHMA Uncharacterized protein OS=Schistosoma mansoni GN=c8413_g1_i2 PE=4 SV=1	7	42.786	-1.27438	18.0381	16.9228	17.1593	17.3734			18.6478	18.6478
A0A146MI59;A0A146MJ85	tr|A0A146MI59|A0A146MI59_SCHMA Uncharacterized protein OS=Schistosoma mansoni GN=c7360_g1_i1 PE=4 SV=1;tr|A0A146MJ85|A0A146MJ85_SCHMA Uncharacterized protein OS=Schistosoma mansoni GN=c7360_g1_i2 PE=4 SV=1	8	35.707	0.0242966	20.9324	21.5702	22.0067	21.5031	21.4443	21.9052	21.0869	21.4788
A0A146MI72	tr|A0A146MI72|A0A146MI72_SCHMA Uncharacterized protein OS=Schistosoma mansoni GN=c18052_g1_i1 PE=4 SV=1	4	9.4979	0.0541073	22.2482	20.5001	20.6313	21.1265	21.2996	20.5566	21.3611	21.0724
A0A146MID7	tr|A0A146MID7|A0A146MID7_SCHMA Uncharacterized protein OS=Schistosoma mansoni GN=c7393_g1_i1 PE=4 SV=1	5	30.885	0.830404	22.1892	21.8562	22.046	22.0305	21.1093	21.3527	21.1381	21.2001
A0A146MIK5	tr|A0A146MIK5|A0A146MIK5_SCHMA Uncharacterized protein OS=Schistosoma mansoni GN=c2371_g1_i1 PE=4 SV=1	2	8.6421	1.08104	23.014	22.8624	22.8688	22.9151	22.5341	20.8044	22.1637	21.834
A0A146MIV7	tr|A0A146MIV7|A0A146MIV7_SCHMA Uncharacterized protein OS=Schistosoma mansoni GN=c11933_g1_i1 PE=3 SV=1	2	9.6468	1.57619	19.4421	19.3062	18.3202	19.0228	18.1785	17.4991	16.6623	17.4466
A0A146MJ29	tr|A0A146MJ29|A0A146MJ29_SCHMA Uncharacterized protein OS=Schistosoma mansoni GN=c5980_g1_i1 PE=4 SV=1	5	26.937	-1.4102	17.9609	20.1823	20.9297	19.691	21.0843	21.0693	21.1499	21.1012
A0A146MJ48;A0A146MII8	tr|A0A146MJ48|A0A146MJ48_SCHMA Uncharacterized protein OS=Schistosoma mansoni GN=c3996_g1_i2 PE=4 SV=1;tr|A0A146MII8|A0A146MII8_SCHMA Uncharacterized protein OS=Schistosoma mansoni GN=c3996_g1_i1 PE=4 SV=1	1	8.643	-1.05505		18.0808		18.0808	18.4639	18.6746	20.269	19.1358
A0A146MJ81	tr|A0A146MJ81|A0A146MJ81_SCHMA Uncharacterized protein OS=Schistosoma mansoni GN=c325_g1_i1 PE=3 SV=1	1	6.7836	-0.045972	19.1077	19.8473	19.542	19.499	19.6731	19.842	19.1198	19.545
A0A146MJC6	tr|A0A146MJC6|A0A146MJC6_SCHMA Uncharacterized protein OS=Schistosoma mansoni GN=c4805_g2_i1 PE=4 SV=1	4	19.71	-4.96626	15.1127	15.5096		15.3112	20.1708	20.4641	20.1974	20.2774
A0A146MJD6	tr|A0A146MJD6|A0A146MJD6_SCHMA Uncharacterized protein OS=Schistosoma mansoni GN=c3893_g1_i1 PE=4 SV=1	6	8.95	-0.894078	23.3765	24.6402	24.4219	24.1462	25.1232	24.9573	25.0403	25.0403
A5H658;G4V604	tr|A5H658|A5H658_SCHMA Histone deacetylase OS=Schistosoma mansoni GN=HDAC1 PE=2 SV=1;tr|G4V604|G4V604_SCHMA Histone deacetylase OS=Schistosoma mansoni GN=Smp_005210 PE=3 SV=1	11	58.256	-0.0495188	20.256	20.35	19.926	20.1773	20.2855	20.7047	19.6903	20.2268
A5HIF3;G4VEQ8	tr|A5HIF3|A5HIF3_SCHMA Nuclear coactivator 1 OS=Schistosoma mansoni GN=NCoA1 PE=4 SV=1;tr|G4VEQ8|G4VEQ8_SCHMA Putative nuclear protein SkiP OS=Schistosoma mansoni GN=Smp_105860 PE=4 SV=1	12	61.622	1.231	20.382	19.6506	20.0562	20.0296	18.9723	18.9787	18.4447	18.7986
A7UAX6;G4LYG5;A7UAX7	tr|A7UAX6|A7UAX6_SCHMA Ornithine aminotransferase OS=Schistosoma mansoni PE=2 SV=1;tr|G4LYG5|G4LYG5_SCHMA Ornithine--oxo-acid transaminase OS=Schistosoma mansoni GN=Smp_000660 PE=3 SV=1;tr|A7UAX7|A7UAX7_SCHMA Ornithine aminotransferase OS=Schistosoma manso	19	48.65	-0.639178	22.3367	23.2388	22.6415	22.739	23.496	22.8403	23.7982	23.3782
A9NI54;G4M0R9;G4M0S0;G4M0S1;A9NI55	tr|A9NI54|A9NI54_SCHMA 26S proteasome subunit ATPase 3 (Fragment) OS=Schistosoma mansoni GN=RPT5a PE=2 SV=1;tr|G4M0R9|G4M0R9_SCHMA 26S protease regulatory subunit 6a, putative OS=Schistosoma mansoni GN=Smp_042270.2 PE=3 SV=1;tr|G4M0S0|G4M0S0_SCHMA 26S prot	20	45.739	0.581932	22.4594	22.4815	22.3638	22.4349	21.844	22.0544	21.6605	21.853
B1AAM6	tr|B1AAM6|B1AAM6_SCHMA LIMPETin OS=Schistosoma mansoni PE=2 SV=1	26	64.75	-4.58104	18.6841	19.2957	19.5571	19.179	23.7346	23.6212	23.9243	23.76
B2CNV1	tr|B2CNV1|B2CNV1_SCHMA Stomatin-like protein 2 OS=Schistosoma mansoni GN=StoLP-2 PE=2 SV=1	12	39.525	0.244567	22.3065	22.226	22.1683	22.2336	22.0649	22.2735	21.6288	21.9891
B4XC67	tr|B4XC67|B4XC67_SCHMA Cathepsin L3 OS=Schistosoma mansoni GN=CL3 PE=2 SV=1	7	41.18	-0.587351	17.8594	19.4071	18.4722	18.5796	19.4534	19.0182	19.0291	19.1669
B8Y6H3	tr|B8Y6H3|B8Y6H3_SCHMA DIF_5 OS=Schistosoma mansoni GN=Smp_105220 PE=2 SV=1	6	14.191	0.0511439	21.4221	22.8062	22.0964	22.1082	22.7375	21.0804	22.3533	22.0571
C1LZ83	tr|C1LZ83|C1LZ83_SCHMA Proteasome activator PA28-gamma OS=Schistosoma mansoni GN=PA28-gamma PE=2 SV=1	10	28.688	1.31359	22.9611	22.6388	22.3286	22.6428	21.3437	21.4976	21.1465	21.3292
C1LZY9	tr|C1LZY9|C1LZY9_SCHMA Serine/threonine-protein phosphatase OS=Schistosoma mansoni GN=Smp_165490 PE=3 SV=2	13	35.756	0.211641	22.0772	22.5422	22.4697	22.363	21.8979	22.3628	22.1935	22.1514
C1M000	tr|C1M000|C1M000_SCHMA Ebna2 binding protein P100, putative OS=Schistosoma mansoni GN=Smp_081570 PE=4 SV=1	17	58.268	3.50036	22.0303	22.141	22.1989	22.1234	18.5312	18.4223	18.9157	18.6231
C1M001;C4QTD7	tr|C1M001|C1M001_SCHMA Ebna2 binding protein P100, putative OS=Schistosoma mansoni GN=Smp_166110 PE=4 SV=1;tr|C4QTD7|C4QTD7_SCHMA Uncharacterized protein OS=Schistosoma mansoni GN=Smp_118190 PE=4 SV=2	10	42.178	3.31186	22.2829	22.3158	22.4039	22.3342	19.1136	18.6727	19.2806	19.0223
C1M093	tr|C1M093|C1M093_SCHMA Aspartyl-tRNA synthetase, putative OS=Schistosoma mansoni GN=Smp_088800 PE=4 SV=2	3	47.048	-1.00665	17.5015	17.1656	14.2687	16.312	18.0101	17.7061	16.2396	17.3186
C1M0E9	tr|C1M0E9|C1M0E9_SCHMA Uncharacterized protein OS=Schistosoma mansoni GN=Smp_172980 PE=4 SV=2	8	30.671	F only	21.0961	21.3568	21.5042	21.319				N/A
C1M0J1	tr|C1M0J1|C1M0J1_SCHMA Small nuclear ribonucleoprotein f (Snrnp-f),putative OS=Schistosoma mansoni GN=Smp_094150 PE=4 SV=1	2	14.164	0.341187	20.4765	20.2255	20.3041	20.3354	20.0869	20.0482	19.8474	19.9942
C1M0L0	tr|C1M0L0|C1M0L0_SCHMA Uncharacterized protein OS=Schistosoma mansoni GN=Smp_094630 PE=4 SV=1	9	79.308	0.657096	19.7293	19.549	19.6108	19.6297	18.9197	18.6862	19.3119	18.9726
C1M0Q1	tr|C1M0Q1|C1M0Q1_SCHMA Putative methyltransferase ncl1 OS=Schistosoma mansoni GN=Smp_175950 PE=3 SV=2	17	84.785	2.04458	19.6903	19.5888	19.7079	19.6623	17.7838	17.3084	17.7611	17.6177
C1M0Q4	tr|C1M0Q4|C1M0Q4_SCHMA Speckle-type poz protein, putative OS=Schistosoma mansoni GN=Smp_175960 PE=4 SV=2	3	23.415	0.732156	19.6627	19.8393	19.7689	19.757	19.1146	19.4696	18.4902	19.0248
C1M0Q9;C1M0R0	tr|C1M0Q9|C1M0Q9_SCHMA Myosin V, putative OS=Schistosoma mansoni GN=Smp_176000.1 PE=4 SV=1;tr|C1M0R0|C1M0R0_SCHMA Myosin V, putative OS=Schistosoma mansoni GN=Smp_176000.2 PE=4 SV=1	8	209.56	0.960267	15.2025	15.3639	15.5652	15.3772	14.1531	14.1922	14.9054	14.4169
C1M0W4	tr|C1M0W4|C1M0W4_SCHMA DNA replication complex GINS protein PSF2 OS=Schistosoma mansoni GN=Smp_100380 PE=3 SV=2	1	21.735	0.606869	18.4778	18.8296	18.2948	18.5341		18.0807	17.7737	17.9272
C1M169	tr|C1M169|C1M169_SCHMA GDP-4-keto-6-deoxy-D-mannose-3, 5-epimerase-4-reductase OS=Schistosoma mansoni GN=GMER PE=2 SV=1	12	35.916	-0.134497	20.8402	20.4075	19.8885	20.3787	20.6791	20.8102	20.0504	20.5132
C1M264	tr|C1M264|C1M264_SCHMA Uncharacterized protein OS=Schistosoma mansoni GN=Smp_186560 PE=4 SV=1	3	34.118	0.761383	17.8191	17.7172	18.0045	17.8469	17.2834	16.9026	17.0706	17.0855
C1M280	tr|C1M280|C1M280_SCHMA Innexin OS=Schistosoma mansoni GN=inx PE=3 SV=2	8	62.796	3.96416	17.5092	17.7369	18.5068	17.9177	13.9535			13.9535
C1M2E3	tr|C1M2E3|C1M2E3_SCHMA Uncharacterized protein OS=Schistosoma mansoni GN=Smp_116360 PE=4 SV=1	3	33.942	M only				N/A	14.1668	18.7805	18.3592	17.1022
C1M2S7	tr|C1M2S7|C1M2S7_SCHMA Helicase, putative OS=Schistosoma mansoni GN=Smp_120360 PE=4 SV=2	14	121.49	-0.198454	17.4791	17.6874	17.7776	17.648	17.6959	17.6149	18.2287	17.8465
C4PXA6	tr|C4PXA6|C4PXA6_SCHMA Thymidylate kinase OS=Schistosoma mansoni GN=Smp_001360 PE=4 SV=1	20	25.485	0.499169	24.8837	24.7808	24.5067	24.7237	24.2864	24.2612	24.126	24.2246
C4PY08	tr|C4PY08|C4PY08_SCHMA Putative sodium/potassium-dependent atpase beta subunit OS=Schistosoma mansoni GN=Smp_124240 PE=2 SV=1	5	32.92	-2.06078	17.356	18.0092	18.0155	17.7936	20.3502	19.709	19.5038	19.8544
C4PY91	tr|C4PY91|C4PY91_SCHMA Rab-2,4,14, putative OS=Schistosoma mansoni GN=Smp_004910 PE=4 SV=1	6	24.767	-1.38524	17.1494	17.9741	18.5469	17.8901	19.5142	19.7468	18.5651	19.2754
C4PYP8	sp|C4PYP8|DRE2_SCHMA Anamorsin homolog OS=Schistosoma mansoni GN=Smp_207000 PE=3 SV=2	4	29.661	-0.498917	19.2913	18.9862	18.5418	18.9398	19.1193	19.7331	19.4637	19.4387
C4PZQ3	sp|C4PZQ3|LIAS_SCHMA Lipoyl synthase, mitochondrial OS=Schistosoma mansoni GN=Smp_010100 PE=3 SV=1	6	45.769	0.851375	17.9169	18.4678	17.7534	18.046	17.6463	17.2384	16.6993	17.1947
C4PZS5;C4PZS6	tr|C4PZS5|C4PZS5_SCHMA 60S acidic ribosomal protein P0 OS=Schistosoma mansoni GN=Smp_009690.1 PE=3 SV=1;tr|C4PZS6|C4PZS6_SCHMA 60S acidic ribosomal protein P0 OS=Schistosoma mansoni GN=Smp_009690.2 PE=3 SV=1	15	35.029	1.15018	24.5637	24.8226	24.6911	24.6925	23.6412	22.8567	24.1289	23.5423
C4PZT0;C4PZS9	tr|C4PZT0|C4PZT0_SCHMA O-linked n-acetylglucosamine transferase, ogt,putative OS=Schistosoma mansoni GN=Smp_009710.2 PE=4 SV=2;tr|C4PZS9|C4PZS9_SCHMA O-linked n-acetylglucosamine transferase, ogt,putative OS=Schistosoma mansoni GN=Smp_009710.3 PE=4 SV=2	2	78.819	M only				N/A	12.9301	13.3943	15.2463	13.8569
C4Q0P6	sp|C4Q0P6|LIS1_SCHMA Lissencephaly-1 homolog OS=Schistosoma mansoni GN=Smp_129340 PE=3 SV=1	9	47.106	-1.00392	18.5008	18.7523	19.1981	18.8171	19.8263	19.6899	19.9467	19.821
C4Q195	tr|C4Q195|C4Q195_SCHMA Uncharacterized protein (Fragment) OS=Schistosoma mansoni GN=Smp_130400 PE=4 SV=2	1	21.566	-0.124548	18.099	18.1233	18.3507	18.191	18.6341	17.8191	18.4934	18.3155
C4Q2F2;C4Q2F3	tr|C4Q2F2|C4Q2F2_SCHMA Calcyphosine/tpp, putative OS=Schistosoma mansoni GN=Smp_019640.1 PE=4 SV=1;tr|C4Q2F3|C4Q2F3_SCHMA Calcyphosine/tpp, putative OS=Schistosoma mansoni GN=Smp_019640.2 PE=4 SV=1	9	23.776	0.0156932	22.3055	22.6647	21.5879	22.1861	22.1625	22.5353	21.8133	22.1704
C4Q2F6	tr|C4Q2F6|C4Q2F6_SCHMA Splicing factor u2af large subunit, putative OS=Schistosoma mansoni GN=Smp_019690 PE=4 SV=1	8	57.958	0.339288	19.8767	19.9517	20.6711	20.1665	19.9216	18.2214	21.3387	19.8272
C4Q2F8;C4Q2F9	tr|C4Q2F8|C4Q2F8_SCHMA Uncharacterized protein OS=Schistosoma mansoni GN=Smp_019730.1 PE=4 SV=1;tr|C4Q2F9|C4Q2F9_SCHMA Uncharacterized protein OS=Schistosoma mansoni GN=Smp_019730.2 PE=4 SV=1	3	13.076	0.366119	20.2663	19.6295	19.493	19.7963	19.6684	19.7652	18.8569	19.4302
C4Q2I0	tr|C4Q2I0|C4Q2I0_SCHMA DNAj homolog subfamily B member, putative (Fragment) OS=Schistosoma mansoni GN=Smp_132870 PE=4 SV=2	3	32.784	0.0390501	17.0838	17.9402	17.9718	17.6653	17.6696	17.9455	17.2636	17.6262
C4Q2I8	tr|C4Q2I8|C4Q2I8_SCHMA Aminoacylase (M20 family) OS=Schistosoma mansoni GN=Smp_019630 PE=4 SV=2	19	48.957	-1.4176	21.6493	21.8468	21.4695	21.6552	23.0012	23.5138	22.7035	23.0728
C4Q309;C4Q308	tr|C4Q309|C4Q309_SCHMA Uncharacterized protein OS=Schistosoma mansoni GN=Smp_021730.1 PE=4 SV=1;tr|C4Q308|C4Q308_SCHMA Uncharacterized protein OS=Schistosoma mansoni GN=Smp_021730.3 PE=4 SV=1	1	25.227	0.107762		15.7895	15.7605	15.775	15.2683	16.105	15.6283	15.6672
C4Q310	tr|C4Q310|C4Q310_SCHMA Uncharacterized protein OS=Schistosoma mansoni GN=Smp_021730.2 PE=4 SV=1	9	25.128	0.350001	23.493	23.2911	23.2069	23.3303	23.3245	22.9103	22.7062	22.9803
C4Q351	tr|C4Q351|C4Q351_SCHMA Camp-dependent protein kinase type I-beta regulatory subunit, putative (Fragment) OS=Schistosoma mansoni GN=Smp_022100 PE=4 SV=1	1	9.3097	-1.37579	18.5772	18.4976	18.1597	18.4115	19.8573	20.0719	19.4327	19.7873
C4Q352	tr|C4Q352|C4Q352_SCHMA Pak inhibitor skb15, putative OS=Schistosoma mansoni GN=Smp_022110 PE=4 SV=1	4	43.685	2.21147	18.5786	18.1375	18.3184	18.3448		16.0595	16.2072	16.1333
C4Q3U8	tr|C4Q3U8|C4Q3U8_SCHMA Tetraspanin OS=Schistosoma mansoni GN=Smp_024820.2 PE=3 SV=1	4	25.177	-2.17075	17.5278	15.7016	19.3635	17.531	20.6299	19.1848	19.2904	19.7017
C4Q4J8	tr|C4Q4J8|C4Q4J8_SCHMA Phosphatidylinositol transfer protein (Fragment) OS=Schistosoma mansoni GN=Smp_136800 PE=4 SV=2	2	35.473	-0.750167			16.3857	16.3857	17.1248	16.4227	17.8602	17.1359
C4Q4Q6	tr|C4Q4Q6|C4Q4Q6_SCHMA 40S ribosomal protein S3, putative OS=Schistosoma mansoni GN=Smp_027610 PE=3 SV=1	19	25.457	0.687394	23.7381	23.9822	24.1264	23.9489	23.2984	22.0949	24.3911	23.2615
C4Q4S4	tr|C4Q4S4|C4Q4S4_SCHMA Synembryn, putative OS=Schistosoma mansoni GN=Smp_027910 PE=4 SV=1	19	60.068	-0.167534	18.6835	18.3309	18.7748	18.5964	18.5466	17.2461	20.4991	18.7639
C4Q4S5	tr|C4Q4S5|C4Q4S5_SCHMA Tubulin alpha chain OS=Schistosoma mansoni GN=Smp_027920 PE=3 SV=1	17	50.174	3.28748	23.3568	23.2912	22.879	23.1757	19.9441	20.2399	19.4805	19.8882
C4Q4W0	tr|C4Q4W0|C4Q4W0_SCHMA Uncharacterized protein OS=Schistosoma mansoni GN=Smp_027880 PE=4 SV=1	3	14.586	0.414707	21.5462	21.602	21.1717	21.44	21.2241	21.1553	20.6964	21.0253
C4Q4W5	tr|C4Q4W5|C4Q4W5_SCHMA Nucleoporin 145 (S59 family) OS=Schistosoma mansoni GN=Smp_027890 PE=4 SV=1	16	135.68	1.61099	19.703	19.5778	19.2644	19.5151	17.417	17.8477	18.4475	17.9041
C4Q4W6	tr|C4Q4W6|C4Q4W6_SCHMA Nuclear pore complex protein nup98, putative OS=Schistosoma mansoni GN=Smp_027900 PE=4 SV=2	5	89.656	-0.344814	14.743	16.2492	15.8936	15.6286	15.7655	16.0605	16.0943	15.9734
C4Q500	tr|C4Q500|C4Q500_SCHMA Caspase-3 OS=Schistosoma mansoni PE=2 SV=1	7	33.108	-0.0993955	21.2128	21.572	20.9099	21.2315	21.4026	21.3182	21.272	21.3309
C4Q592;G4LW88	tr|C4Q592|C4Q592_SCHMA Methyl-CpG binding domain protein OS=Schistosoma mansoni GN=MBD PE=2 SV=1;tr|G4LW88|G4LW88_SCHMA Methyl-cpg binding protein, mbd, putative OS=Schistosoma mansoni GN=Smp_138180.2 PE=4 SV=1	6	35.643	0.0983807	19.1829	18.7194	18.4348	18.779	18.7868	18.5108	18.7444	18.6807
C4Q5I7	tr|C4Q5I7|C4Q5I7_SCHMA Calreticulin autoantigen homolog,putative OS=Schistosoma mansoni GN=Smp_030370 PE=3 SV=2	2	45.377	-0.571266	18.7038	18.568	18.9924	18.7547	20.3033	20.4918	17.1828	19.326
C4Q5J0	tr|C4Q5J0|C4Q5J0_SCHMA Camp-dependent protein kinase type I-beta regulatory subunit, putative OS=Schistosoma mansoni GN=Smp_030400 PE=4 SV=2	9	44.456	-2.46419	18.392	17.3248	17.3164	17.6777	20.0736	20.3247	20.0274	20.1419
C4Q5J8;C4Q5J9;Q5QEI6	tr|C4Q5J8|C4Q5J8_SCHMA Glycerol-3-phosphate dehydrogenase [NAD(+)] OS=Schistosoma mansoni GN=Smp_030500.1 PE=3 SV=1;tr|C4Q5J9|C4Q5J9_SCHMA Glycerol-3-phosphate dehydrogenase [NAD(+)] OS=Schistosoma mansoni GN=Smp_030500.2 PE=3 SV=1;tr|Q5QEI6|Q5QEI6_SCHMA G	20	38.861	-0.466072	21.8776	22.0228	21.847	21.9158	22.4104	21.7323	23.003	22.3819
C4Q5L0;C4Q5L1	tr|C4Q5L0|C4Q5L0_SCHMA DNAj homolog subfamily C member, putative OS=Schistosoma mansoni GN=Smp_138680.2 PE=4 SV=2;tr|C4Q5L1|C4Q5L1_SCHMA DNAj homolog subfamily C member, putative OS=Schistosoma mansoni GN=Smp_138680.1 PE=4 SV=1	4	45.789	-0.64899	16.2946	16.4785	15.9158	16.2296	16.9793	16.6681	16.9884	16.8786
C4Q5M7	tr|C4Q5M7|C4Q5M7_SCHMA Syntaxin, putative OS=Schistosoma mansoni GN=Smp_138840 PE=4 SV=2	5	37.221	0.215046	17.8963	19.1186	16.2772	17.764	18.3615	16.8314	17.4541	17.549
C4Q5Q2	tr|C4Q5Q2|C4Q5Q2_SCHMA Uncharacterized protein OS=Schistosoma mansoni GN=Smp_139120 PE=4 SV=2	4	22.392	-0.48567	17.3761	18.7896	18.5766	18.2475	18.5845	17.7394	19.8754	18.7331
C4Q5U3	tr|C4Q5U3|C4Q5U3_SCHMA Ankyrin 2,3/unc44, putative (Fragment) OS=Schistosoma mansoni GN=Smp_139110 PE=4 SV=2	28	105.7	-0.388834	20.0292	20.4057	20.7019	20.3789	20.7708	20.3484	21.1841	20.7678
C4Q5U5	tr|C4Q5U5|C4Q5U5_SCHMA Basigin related OS=Schistosoma mansoni GN=Smp_031880 PE=2 SV=1	7	32.499	-1.63696	19.2535	19.792	19.7283	19.5912	21.4057	21.254	21.0249	21.2282
C4Q5Y4;C4Q5Y6;C4Q5Y7;C4Q5Y5;C4Q5Y3;C4Q5Y8	tr|C4Q5Y4|C4Q5Y4_SCHMA Uncharacterized protein OS=Schistosoma mansoni GN=Smp_031920.7 PE=4 SV=1;tr|C4Q5Y6|C4Q5Y6_SCHMA Uncharacterized protein OS=Schistosoma mansoni GN=Smp_031920.3 PE=4 SV=1;tr|C4Q5Y7|C4Q5Y7_SCHMA Uncharacterized protein OS=Schistosoma ma	6	30.98	1.14841	18.3784	19.1536	18.7138	18.7486	18.0258	15.0584	19.7164	17.6002
C4Q5Z2;C4Q5Z1	tr|C4Q5Z2|C4Q5Z2_SCHMA Uncharacterized protein OS=Schistosoma mansoni GN=Smp_031950.1 PE=4 SV=1;tr|C4Q5Z1|C4Q5Z1_SCHMA Uncharacterized protein OS=Schistosoma mansoni GN=Smp_031950.2 PE=4 SV=1	2	17.299	-0.557086	16.3281	16.95	15.8548	16.3776	17.1353	16.8438	16.825	16.9347
C4Q728;C4Q726;C4Q727	tr|C4Q728|C4Q728_SCHMA Uncharacterized protein OS=Schistosoma mansoni GN=Smp_141820.2 PE=4 SV=1;tr|C4Q726|C4Q726_SCHMA Uncharacterized protein OS=Schistosoma mansoni GN=Smp_141820.1 PE=4 SV=1;tr|C4Q727|C4Q727_SCHMA Uncharacterized protein OS=Schistosoma ma	4	27.006	0.848228	19.0368	17.9454	18.2092	18.3971	18.2939	16.4085	17.9443	17.5489
C4Q7T4	tr|C4Q7T4|C4Q7T4_SCHMA Nuclear protein localization, putative OS=Schistosoma mansoni GN=Smp_039180.1 PE=4 SV=1	18	77.432	-0.0917127	20.0946	19.9764	20.1884	20.0865	20.037	20.3278	20.1699	20.1782
C4Q820;G4VKI3	tr|C4Q820|C4Q820_SCHMA Putative cytochrome C oxidase polypeptide vib OS=Schistosoma mansoni GN=Smp_144000 PE=4 SV=1;tr|G4VKI3|G4VKI3_SCHMA Putative cytochrome C oxidase polypeptide vib OS=Schistosoma mansoni GN=Smp_144010.2 PE=4 SV=1	5	11.456	0.295552	21.2206	21.245	21.2517	21.2391	21.1324	21.0206	20.6777	20.9436
C4Q9B4	tr|C4Q9B4|C4Q9B4_SCHMA Dynamin, putative OS=Schistosoma mansoni GN=Smp_044920 PE=3 SV=2	15	92.81	-1.48956	17.4038	18.0037	18.0043	17.8039	18.7769	19.6174	19.486	19.2935
C4Q9B5	tr|C4Q9B5|C4Q9B5_SCHMA Syntaxin binding protein-1,2,3, putative (Fragment) OS=Schistosoma mansoni GN=Smp_146400 PE=3 SV=2	4	72.642	0.680298	16.4542	18.1185	18.1115	17.5614	16.1421	16.3166	18.1847	16.8811
C4Q9B6	tr|C4Q9B6|C4Q9B6_SCHMA Uncharacterized protein OS=Schistosoma mansoni GN=Smp_146410 PE=4 SV=2	2	33.51	-0.3115	26.2958	25.9997	26.0979	26.1312	26.1129	26.7897	26.4253	26.4427
C4QB35	tr|C4QB35|C4QB35_SCHMA Heterogeneous nuclear ribonucleoprotein l (Hnrnp l), putative OS=Schistosoma mansoni GN=Smp_051530 PE=4 SV=1	16	61.346	0.6495	21.1765	21.1117	21.4568	21.2483	20.2378	20.8915	20.6672	20.5988
C4QB42	tr|C4QB42|C4QB42_SCHMA Heterogeneous nuclear ribonucleoprotein l (Hnrnp l), putative OS=Schistosoma mansoni GN=Smp_149700 PE=4 SV=2	6	59.166	-0.3825	18.5911	18.8238	18.938	18.7843	19.3493	19.1127	19.0383	19.1668
C4QBN1;Q9GSS8;G4LXZ8	tr|C4QBN1|C4QBN1_SCHMA Histone H4 OS=Schistosoma mansoni GN=Smp_053300 PE=3 SV=1;tr|Q9GSS8|Q9GSS8_SCHMA Histone H4 (Fragment) OS=Schistosoma mansoni PE=3 SV=1;tr|G4LXZ8|G4LXZ8_SCHMA Histone H4 (Fragment) OS=Schistosoma mansoni GN=Smp_149600 PE=3 SV=1	12	11.367	-1.08394	27.4129	26.9273	27.1541	27.1647	28.0373	27.5859	29.1229	28.2487
C4QBX7	tr|C4QBX7|C4QBX7_SCHMA Uncharacterized protein OS=Schistosoma mansoni GN=Smp_151230 PE=4 SV=1	2	8.6766	0.83808	20.6267	21.6231	21.0574	21.1024	20.4601	20.4921	19.8408	20.2643
C4QC82	tr|C4QC82|C4QC82_SCHMA Uncharacterized protein OS=Schistosoma mansoni GN=Smp_151780 PE=4 SV=1	2	23.902	0.205553	18.3591	16.7721	16.7292	17.2868	16.0784	17.5911	17.5743	17.0813
C4QCA0;C4QCA1	tr|C4QCA0|C4QCA0_SCHMA Chmp1 (Chromatin modifying protein) (Charged multivesicular body protein), putative OS=Schistosoma mansoni GN=Smp_055880.1 PE=4 SV=2;tr|C4QCA1|C4QCA1_SCHMA Chmp1 (Chromatin modifying protein) (Charged multivesicular body protein), pu	7	25.953	0.62812	21.2445	21.1541	20.9034	21.1007	20.6002	20.4801	20.3373	20.4725
C4QCA2	tr|C4QCA2|C4QCA2_SCHMA Ribonucleoside-diphosphate reductase small chain, putative OS=Schistosoma mansoni GN=Smp_055890 PE=4 SV=1	16	42.269	-0.745188	21.4496	21.888	22.399	21.9122	22.7631	22.9563	22.2527	22.6574
C4QCD2	sp|C4QCD2|PURA_SCHMA Adenylosuccinate synthetase OS=Schistosoma mansoni GN=Smp_055990 PE=3 SV=2	7	46.668	0.69264	17.2688	18.7113	18.0669	18.0157	17.1878	17.5417	17.2396	17.323
C4QCX0	tr|C4QCX0|C4QCX0_SCHMA Uncharacterized protein OS=Schistosoma mansoni GN=Smp_057720.1 PE=4 SV=2	2	8.3379	1.55298	21.8218	21.8853	21.6241	21.777	20.7876	21.229	18.6556	20.2241
C4QDB5	tr|C4QDB5|C4QDB5_SCHMA Uncharacterized protein OS=Schistosoma mansoni GN=Smp_059240 PE=4 SV=1	2	25.109	0.958357			17.5412	17.5412	16.2553	15.5189	17.9743	16.5828
C4QDC5	tr|C4QDC5|C4QDC5_SCHMA Sugar nucleotide epimerase related OS=Schistosoma mansoni GN=Smp_154040 PE=4 SV=2	5	32.511	-0.791546	19.4644	19.4608	19.1536	19.3596	20.2569	20.308	19.8884	20.1511
C4QDC9	tr|C4QDC9|C4QDC9_SCHMA Derlin OS=Schistosoma mansoni GN=Smp_059350.2 PE=3 SV=1	1	29.056	-1.14057	16.9605		18.0805	17.5205	18.6064	17.9228	19.454	18.6611
C4QDD1	tr|C4QDD1|C4QDD1_SCHMA Pre-mRNA processing factor, putative OS=Schistosoma mansoni GN=Smp_059360 PE=4 SV=1	6	45.71	-0.637966	18.6782	18.0653	17.5856	18.1097	18.6775	19.2526	18.3129	18.7477
C4QDY7;C4QDY6	tr|C4QDY7|C4QDY7_SCHMA Nonsense-mediated mRNA decay protein 1 (Rent1),putative OS=Schistosoma mansoni GN=Smp_061590.2 PE=4 SV=1;tr|C4QDY6|C4QDY6_SCHMA Nonsense-mediated mRNA decay protein 1 (Rent1),putative OS=Schistosoma mansoni GN=Smp_061590.1 PE=4 SV=1	31	142.25	-0.230314	18.5817	19.2287	19.548	19.1195	19.2432	19.4836	19.3227	19.3498
C4QE42	tr|C4QE42|C4QE42_SCHMA Uncharacterized protein OS=Schistosoma mansoni GN=Smp_155590 PE=4 SV=1	2	33.504	-2.03326	15.8339			15.8339	17.8815	17.6635	18.0564	17.8671
C4QEK9	tr|C4QEK9|C4QEK9_SCHMA Filamin-related OS=Schistosoma mansoni GN=Smp_156590 PE=4 SV=2	57	179.18	-0.594221	20.894	21.278	21.5412	21.2377	21.7905	22.1791	21.5262	21.832
C4QFX9;C4QFY0	tr|C4QFX9|C4QFX9_SCHMA Heat shock protein 70 (Hsp70)-4, putative OS=Schistosoma mansoni GN=Smp_069130.2 PE=3 SV=1;tr|C4QFY0|C4QFY0_SCHMA Heat shock protein 70 (Hsp70)-4, putative OS=Schistosoma mansoni GN=Smp_069130.1 PE=3 SV=1	47	94.463	-0.803845	24.273	24.4493	24.7148	24.479	25.1759	25.4411	25.2315	25.2829
C4QH88;Q9XY89	tr|C4QH88|C4QH88_SCHMA Annexin OS=Schistosoma mansoni GN=Smp_074150.1 PE=1 SV=1;tr|Q9XY89|Q9XY89_SCHMA Annexin OS=Schistosoma mansoni PE=2 SV=1	20	41.415	-1.06981	21.2945	21.9024	21.3007	21.4992	22.6838	22.3591	22.6641	22.569
C4QHD7;C4QNM9	tr|C4QHD7|C4QHD7_SCHMA Histone H3 OS=Schistosoma mansoni GN=Smp_074610 PE=3 SV=1;tr|C4QNM9|C4QNM9_SCHMA Histone H3, putative OS=Schistosoma mansoni GN=Smp_177140 PE=3 SV=1	4	15.344	-1.08335	25.4475	25.2456	25.6444	25.4459	26.4862	25.6931	27.4083	26.5292
C4QIC0	tr|C4QIC0|C4QIC0_SCHMA Tubulin beta chain OS=Schistosoma mansoni GN=Smp_078040 PE=3 SV=1	1	49.82	-3.14715	15.4761	16.7645		16.1203	19.5469	18.4564	19.7992	19.2675
C4QIH2	tr|C4QIH2|C4QIH2_SCHMA Lupus la ribonucleoprotein, putative OS=Schistosoma mansoni GN=Smp_164650 PE=4 SV=2	24	42.49	1.4315	24.9446	24.7915	24.6209	24.7857	23.4233	23.5582	23.0811	23.3542
C4QIH8	tr|C4QIH8|C4QIH8_SCHMA DNA primase large subunit, putative OS=Schistosoma mansoni GN=Smp_079050.1 PE=4 SV=1	9	58.881	-0.0774297	17.3348	18.7937	18.6246	18.251	18.4944	18.1122	18.3787	18.3285
C4QII3	tr|C4QII3|C4QII3_SCHMA Uncharacterized protein OS=Schistosoma mansoni GN=Smp_164780 PE=4 SV=2	4	32.578	2.23529	19.7407	18.8154	19.3556	19.3039	18.1273	16.8301	16.2483	17.0686
C4QII4	tr|C4QII4|C4QII4_SCHMA Mitochondrial ribosomal protein S9, putative OS=Schistosoma mansoni GN=Smp_164790 PE=4 SV=2	2	12.891	1.49892	19.3282	18.8746	18.8798	19.0275	17.5687	17.6439	17.3732	17.5286
C4QII5	tr|C4QII5|C4QII5_SCHMA 26S proteasome regulatory subunit S3, putative OS=Schistosoma mansoni GN=Smp_164800 PE=4 SV=1	5	29.841	-1.05169	16.9354	17.6469	18.0922	17.5582	18.2397	18.2281	19.3618	18.6099
C4QJ35	tr|C4QJ35|C4QJ35_SCHMA ATP-dependent transporter, putative OS=Schistosoma mansoni GN=Smp_166040 PE=4 SV=2	12	112.26	0.123449	17.8156	17.196	17.8329	17.6148	17.3213	15.8794	19.2733	17.4913
C4QJA1	tr|C4QJA1|C4QJA1_SCHMA ATP synthase delta chain, mitochondrial,putative OS=Schistosoma mansoni GN=Smp_082120 PE=3 SV=1	6	17.354	-0.0505392	21.7458	21.6919	21.4133	21.617	21.403	21.5598	22.0399	21.6675
C4QJA5	tr|C4QJA5|C4QJA5_SCHMA Guanosine-diphosphatase, putative OS=Schistosoma mansoni GN=Smp_166520 PE=3 SV=1	2	53.28	M only				N/A	16.0053	17.0745	16.1712	16.417
C4QJA9	tr|C4QJA9|C4QJA9_SCHMA Translation initiation factor 2b, delta subunit,putative OS=Schistosoma mansoni GN=Smp_166550 PE=3 SV=1	4	45.929	-0.51335	16.3428	16.5304	16.1887	16.354	17.2458	15.3241	18.032	16.8673
C4QJB2;Q8MTY0	tr|C4QJB2|C4QJB2_SCHMA NADPH:adrenodoxin oxidoreductase, mitochondrial OS=Schistosoma mansoni GN=Smp_166580 PE=3 SV=1;tr|Q8MTY0|Q8MTY0_SCHMA NADPH:adrenodoxin oxidoreductase, mitochondrial OS=Schistosoma mansoni PE=2 SV=1	7	60.272	-1.83925			15.5262	15.5262	17.4253	16.2634	18.4076	17.3654
C4QK30	tr|C4QK30|C4QK30_SCHMA Protein bat5 (S09 family) (Fragment) OS=Schistosoma mansoni GN=Smp_084790 PE=4 SV=2	2	30.454	-1.21955			16.1864	16.1864	17.6394	17.9627	16.6158	17.406
C4QKE4	tr|C4QKE4|C4QKE4_SCHMA Uncharacterized protein OS=Schistosoma mansoni GN=Smp_168820 PE=4 SV=2	3	65.706	-0.930124	15.081	15.6338	17.2022	15.9723	16.8606	15.952	17.8948	16.9025
C4QKF1;C4QKF0	tr|C4QKF1|C4QKF1_SCHMA Metastasis-associated protein 1 (Mta1),putative OS=Schistosoma mansoni GN=Smp_168850.2 PE=4 SV=1;tr|C4QKF0|C4QKF0_SCHMA Metastasis-associated protein 1 (Mta1),putative OS=Schistosoma mansoni GN=Smp_168850.1 PE=4 SV=1	7	68.339	0.634153	16.3867	15.6515	16.1898	16.076	15.6363	15.149	15.5403	15.4419
C4QKF2	tr|C4QKF2|C4QKF2_SCHMA Putative RNA-binding protein OS=Schistosoma mansoni GN=Smp_168860 PE=4 SV=1	1	24.579	0.799878	16.7163	16.2027	16.335	16.418	15.6466		15.5897	15.6181
C4QKQ4	tr|C4QKQ4|C4QKQ4_SCHMA 50S ribosomal protein L3, putative OS=Schistosoma mansoni GN=Smp_087440 PE=4 SV=1	3	44.965	-2.31488	15.1985	13.0653	16.3824	14.8821			17.1969	17.1969
C4QKQ5;C4QKQ6	tr|C4QKQ5|C4QKQ5_SCHMA Uncharacterized protein OS=Schistosoma mansoni GN=Smp_169720.1 PE=4 SV=2;tr|C4QKQ6|C4QKQ6_SCHMA Uncharacterized protein OS=Schistosoma mansoni GN=Smp_169720.2 PE=4 SV=2	2	47.448	M only				N/A	14.6187	15.981	15.9228	15.5075
C4QKQ7	tr|C4QKQ7|C4QKQ7_SCHMA Fascin, putative OS=Schistosoma mansoni GN=Smp_169730 PE=4 SV=1	9	68.956	-0.642352	18.4635	18.4757	18.4031	18.4475	18.7042	19.6193	18.9459	19.0898
C4QKQ9	tr|C4QKQ9|C4QKQ9_SCHMA Polynucleotide kinase-3-phosphatase, putative OS=Schistosoma mansoni GN=Smp_169740 PE=4 SV=2	12	76.495	0.740444	19.6287	19.2011	19.2056	19.3451	18.8569	18.4077	18.5495	18.6047
C4QKR0;B0EVY6	tr|C4QKR0|C4QKR0_SCHMA Dicer-1, putative OS=Schistosoma mansoni GN=Smp_169750 PE=4 SV=2;tr|B0EVY6|B0EVY6_SCHMA Dicer OS=Schistosoma mansoni PE=2 SV=1	9	263.98	-4.02405	9.05623	11.5833	12.3342	10.9912			15.0153	15.0153
C4QKR3	tr|C4QKR3|C4QKR3_SCHMA Uncharacterized protein OS=Schistosoma mansoni GN=Smp_169770 PE=4 SV=2	4	64.608	-1.17887			16.7191	16.7191	17.6419	17.9083	18.1438	17.898
C4QKY6	tr|C4QKY6|C4QKY6_SCHMA Spectrin beta chain, brain 4 (Spectrin, non-erythroid beta chain 4) (Beta-V spectrin) (BSPECV),putative OS=Schistosoma mansoni GN=Smp_170310 PE=4 SV=2	23	47.589	-1.19673	21.9155	22.1336	22.0888	22.046	23.1266	23.4856	23.1158	23.2427
C4QL66	tr|C4QL66|C4QL66_SCHMA Ubiquitin (Ribosomal protein L40), putative OS=Schistosoma mansoni GN=Smp_089430 PE=4 SV=1	1	14.615	1.72514	21.4506	21.3755	21.2366	21.3542	19.473	19.8835	19.5308	19.6291
C4QLP6	tr|C4QLP6|C4QLP6_SCHMA Ubiquitin-fold modifier 1 OS=Schistosoma mansoni GN=Smp_091230 PE=3 SV=1	1	9.1094	1.24529	19.455	19.527	19.4456	19.4759	17.9094	18.5517		18.2306
C4QLY5	tr|C4QLY5|C4QLY5_SCHMA NADH-ubiquinone oxidoreductase mitochondrial, putative OS=Schistosoma mansoni GN=Smp_092570 PE=3 SV=1	12	31.704	0.0444984	21.3239	21.6817	21.7549	21.5868	21.6228	21.6388	21.3654	21.5423
C4QLY6	tr|C4QLY6|C4QLY6_SCHMA GTP-binding protein alpha subunit, gna,putative OS=Schistosoma mansoni GN=Smp_092580 PE=4 SV=2	1	14.372	-0.931072	21.3122	20.2566	20.4423	20.6703	21.2097	24.095	19.4996	21.6014
C4QM45	tr|C4QM45|C4QM45_SCHMA E2F/DP family, putative OS=Schistosoma mansoni GN=Smp_093310 PE=3 SV=1	4	32.642	-0.262695	19.4077	19.2475	17.9968	18.884	19.1356	19.3837	18.9208	19.1467
C4QM46	tr|C4QM46|C4QM46_SCHMA Ribosome biogenesis protein Nop10, putative OS=Schistosoma mansoni GN=Smp_093320 PE=4 SV=1	1	7.6236	0.736703	23.5466	23.2611	23.3853	23.3976	22.8141	22.9337	22.235	22.6609
C4QMA7	tr|C4QMA7|C4QMA7_SCHMA Serine/threonine kinase OS=Schistosoma mansoni GN=Smp_094250 PE=3 SV=1	6	55.269	-1.43302	15.3435	17.0688	18.2745	16.8956	18.6637	17.9555	18.3668	18.3286
C4QMB0	tr|C4QMB0|C4QMB0_SCHMA Serine/threonine-protein phosphatase 2A 55 kDa regulatory subunit B (Fragment) OS=Schistosoma mansoni GN=Smp_173810 PE=3 SV=1	6	56.373	-2.07697	15.9277	17.1145	16.274	16.4387	18.1497	18.6361	18.7613	18.5157
C4QMB3;A9NI53	tr|C4QMB3|C4QMB3_SCHMA 26S protease regulatory subunit, putative OS=Schistosoma mansoni GN=Smp_173840 PE=3 SV=1;tr|A9NI53|A9NI53_SCHMA 26S proteasome subunit ATPase 4 (Fragment) OS=Schistosoma mansoni GN=RPT4 PE=2 SV=1	21	49.181	0.592885	22.5221	22.7911	22.7372	22.6835	22.0525	22.2268	21.9925	22.0906
C4QMH7	tr|C4QMH7|C4QMH7_SCHMA Uncharacterized protein OS=Schistosoma mansoni GN=Smp_095250 PE=4 SV=1	5	20.287	0.4086	21.422	21.3682	21.3305	21.3736	21.0789	21.1646	20.6513	20.965
C4QMI1	tr|C4QMI1|C4QMI1_SCHMA Serine-threonine kinase receptor-associated protein (Strap), putative OS=Schistosoma mansoni GN=Smp_174390 PE=4 SV=2	16	40.101	1.13059	22.4559	22.3507	21.9387	22.2484	21.0169	21.476	20.8606	21.1178
C4QMW6	tr|C4QMW6|C4QMW6_SCHMA Uncharacterized protein OS=Schistosoma mansoni GN=Smp_096790 PE=4 SV=2	1	20.919	0.665242	19.8025	20.5969	19.6198	20.0064	19.2334		19.4489	19.3412
C4QMW7	tr|C4QMW7|C4QMW7_SCHMA 26S proteasome regulatory subunit rpn2,putative OS=Schistosoma mansoni GN=Smp_175250 PE=4 SV=2	30	107.81	0.41966	21.3661	21.6366	21.6946	21.5658	21.106	20.1762	22.1561	21.1461
C4QMW9	tr|C4QMW9|C4QMW9_SCHMA Uncharacterized protein OS=Schistosoma mansoni GN=Smp_096810.1 PE=4 SV=2	6	55.493	0.506465	19.992	19.5594	19.4444	19.6653	18.8276	19.2223	19.4265	19.1588
C4QNP4	tr|C4QNP4|C4QNP4_SCHMA Cytidylate kinase (Fragment) OS=Schistosoma mansoni GN=Smp_177230 PE=4 SV=2	1	8.3635	0.290536		19.3326	19.2013	19.267	18.8552	19.1014	18.9727	18.9764
C4QNZ5	tr|C4QNZ5|C4QNZ5_SCHMA Phenylalanyl-tRNA synthetase alpha chain,putative OS=Schistosoma mansoni GN=Smp_101230 PE=4 SV=2	6	31.852	0.902918	21.0135	20.9218	20.9308	20.9554	20.3529	19.6135	20.1911	20.0525
C4QNZ6	tr|C4QNZ6|C4QNZ6_SCHMA Phenylalanyl-tRNA synthetase alpha chain,putative OS=Schistosoma mansoni GN=Smp_101240 PE=4 SV=2	5	26.119	0.46827	20.1762	20.0352	19.9641	20.0585	19.8709	19.4199	19.4799	19.5902
C4QNZ7	tr|C4QNZ7|C4QNZ7_SCHMA Uncharacterized protein OS=Schistosoma mansoni GN=Smp_178210 PE=4 SV=1	4	45.324	M only				N/A	16.6221	17.1444	17.085	16.9505
C4QP14	tr|C4QP14|C4QP14_SCHMA 60S ribosomal protein L7, putative OS=Schistosoma mansoni GN=Smp_101450 PE=4 SV=1	10	29.663	0.527406	22.2851	21.8172	21.6967	21.933	20.745	19.677	23.7949	21.4056
C4QP66	tr|C4QP66|C4QP66_SCHMA Uncharacterized protein OS=Schistosoma mansoni GN=Smp_178810 PE=4 SV=1	17	44.263	-0.0822069	22.3252	22.69	22.4151	22.4768	22.6609	22.777	22.2392	22.559
C4QPD0	tr|C4QPD0|C4QPD0_SCHMA Eukaryotic translation initiation factor 2c,putative OS=Schistosoma mansoni GN=Smp_179320 PE=4 SV=2	43	102.27	0.373401	23.686	23.6335	23.6912	23.6702	23.3832	22.8967	23.6105	23.2968
C4QPD1;C4QPD2	tr|C4QPD1|C4QPD1_SCHMA Eukaryotic translation initiation factor 2c,putative OS=Schistosoma mansoni GN=Smp_102690.3 PE=3 SV=1;tr|C4QPD2|C4QPD2_SCHMA Eukaryotic translation initiation factor 2c,putative OS=Schistosoma mansoni GN=Smp_102690.2 PE=3 SV=1	15	105.07	-2.7143	13.417	15.1693	16.2921	14.9595	17.9216	15.8074	19.2924	17.6738
C4QPH4;C4QPH5	tr|C4QPH4|C4QPH4_SCHMA FAA4 Long-chain-fatty-acid--CoA ligase 4 OS=Schistosoma mansoni GN=Smp_103160.1 PE=4 SV=1;tr|C4QPH5|C4QPH5_SCHMA Long-chain-fatty-acid--CoA ligase OS=Schistosoma mansoni GN=Smp_103160.2 PE=4 SV=1	17	91.584	-3.26148	14.5456	13.32		13.9328	16.592	14.559	20.4318	17.1943
C4QPK4;C4QPK3	tr|C4QPK4|C4QPK4_SCHMA Eukaryotictranslation initiation factor,putative OS=Schistosoma mansoni GN=Smp_103460.2 PE=4 SV=1;tr|C4QPK3|C4QPK3_SCHMA Eukaryotictranslation initiation factor,putative OS=Schistosoma mansoni GN=Smp_103460.1 PE=4 SV=1	14	31.912	-0.219173	21.7517	21.5803	21.5077	21.6133	21.7869	21.6422	22.0682	21.8324
C4QPK6	tr|C4QPK6|C4QPK6_SCHMA Mago nashi protein homolog OS=Schistosoma mansoni GN=Smp_103470.1 PE=4 SV=2	13	16.954	0.602097	22.9821	23.1774	22.8922	23.0172	22.3121	22.6252	22.3081	22.4151
C4QPQ0	tr|C4QPQ0|C4QPQ0_SCHMA Axonemal dynein intermediate chain, putative OS=Schistosoma mansoni GN=Smp_103920 PE=4 SV=1	2	71.781	M only				N/A	13.9318	14.7896	14.3491	14.3568
C4QPU0	tr|C4QPU0|C4QPU0_SCHMA Phospholipid-transporting ATPase OS=Schistosoma mansoni GN=Smp_104500 PE=3 SV=1	6	123.32	-1.35334		14.7965	16.1991	15.4978	16.6058	17.0097	16.9379	16.8511
C4QPU2	tr|C4QPU2|C4QPU2_SCHMA Vacuolar protein sorting-associated, putative OS=Schistosoma mansoni GN=Smp_104520 PE=3 SV=1	3	69.28	-0.056243	15.2152	14.4343	16.1766	15.2753	15.1859	15.1452	15.6636	15.3316
C4QPU7	tr|C4QPU7|C4QPU7_SCHMA Phosphoglucomutase, putative OS=Schistosoma mansoni GN=Smp_180530.3 PE=3 SV=2	14	44.212	0.791847	22.9178	22.7035	22.4568	22.6927	21.9418	21.7879	21.9729	21.9009
C4QPU8	tr|C4QPU8|C4QPU8_SCHMA Phosphoglucomutase, putative OS=Schistosoma mansoni GN=Smp_180530.4 PE=3 SV=2	5	44.898	0.391864	20.0635	20.9	20.7992	20.5876	20.0799	19.938	20.5693	20.1957
C4QPU9	tr|C4QPU9|C4QPU9_SCHMA Uncharacterized protein OS=Schistosoma mansoni GN=Smp_180540 PE=4 SV=1	5	30.921	0.790486	20.3543	20.0647	19.5095	19.9762	18.8723	19.1786	19.5062	19.1857
C4QQ81;C4QQ82	tr|C4QQ81|C4QQ81_SCHMA NADH-ubiquinone oxidoreductase 39 kD subunit,putative OS=Schistosoma mansoni GN=Smp_106080.1 PE=4 SV=1;tr|C4QQ82|C4QQ82_SCHMA NADH-ubiquinone oxidoreductase 39 kD subunit,putative OS=Schistosoma mansoni GN=Smp_106080.2 PE=4 SV=1	14	37.678	-0.000860368	19.5781	20.6867	20.5324	20.2657	20.9276	18.7086	21.1635	20.2666
C4QRU8	tr|C4QRU8|C4QRU8_SCHMA Uncharacterized protein (Fragment) OS=Schistosoma mansoni GN=Smp_186680 PE=4 SV=1	2	15.139	M only				N/A	19.1892	19.5612	19.0661	19.2722
C4QT67	tr|C4QT67|C4QT67_SCHMA Uncharacterized protein (Fragment) OS=Schistosoma mansoni GN=Smp_190770 PE=4 SV=2	4	16.85	0.245591	19.752	19.8258	19.2355	19.6044	19.7529	18.6921	19.6315	19.3588
C4QT89	tr|C4QT89|C4QT89_SCHMA Stard10 protein, putative OS=Schistosoma mansoni GN=Smp_190970 PE=4 SV=2	3	18.493	-1.63266		16.7072	18.3242	17.5157	19.577	19.4006	18.4676	19.1484
C4QTZ4;C4QTH5	tr|C4QTZ4|C4QTZ4_SCHMA Tsg101-related (Fragment) OS=Schistosoma mansoni GN=Smp_193270 PE=4 SV=2;tr|C4QTH5|C4QTH5_SCHMA Uncharacterized protein OS=Schistosoma mansoni GN=Smp_191690 PE=4 SV=2	2	7.5955	-1.33037	18.2898	19.0177	18.3751	18.5609	19.8279	20.4605	19.3853	19.8912
C4QU00	tr|C4QU00|C4QU00_SCHMA Uncharacterized protein (Fragment) OS=Schistosoma mansoni GN=Smp_193330 PE=4 SV=1	5	14.357	-0.774927	20.1419	19.8082	21.0296	20.3266	20.9406	21.3673	20.9965	21.1015
C4QU01	tr|C4QU01|C4QU01_SCHMA Uncharacterized protein OS=Schistosoma mansoni GN=Smp_119910 PE=4 SV=1	8	53.095	-0.602181	19.5496	19.1954	19.7121	19.4857	19.9843	20.3635	19.9159	20.0879
C4QU02	tr|C4QU02|C4QU02_SCHMA Ribosomal protein S9, putative OS=Schistosoma mansoni GN=Smp_119920 PE=3 SV=1	9	16.859	1.37117	24.1552	23.9413	24.1184	24.0717	22.6514	21.3315	24.1185	22.7005
C4QU53	tr|C4QU53|C4QU53_SCHMA Tsg101-related OS=Schistosoma mansoni GN=Smp_193790 PE=4 SV=1	4	29.008	-0.936105	18.2251	18.8014	18.7723	18.5996	19.4084	19.8996	19.2991	19.5357
C4QU54	tr|C4QU54|C4QU54_SCHMA Spliceosome-associated protein, putative OS=Schistosoma mansoni GN=Smp_120320.1 PE=4 SV=1	13	73.956	0.048989	19.333	18.7741	18.4368	18.8479	18.6682	19.3018	18.4268	18.799
C4QU57	tr|C4QU57|C4QU57_SCHMA Uncharacterized protein OS=Schistosoma mansoni GN=Smp_120350 PE=4 SV=1	7	60.354	1.20002	15.6187	17.2791	17.7779	16.8919	15.4552	15.9286		15.6919
C4QUB0	tr|C4QUB0|C4QUB0_SCHMA Uncharacterized protein OS=Schistosoma mansoni GN=Smp_120900 PE=4 SV=2	3	12.57	-0.610741	18.414	18.7185	19.5399	18.8908	19.9998	20.0544	18.4504	19.5015
C4QUG0	tr|C4QUG0|C4QUG0_SCHMA tRNA (adenine(58)-N(1))-methyltransferase catalytic subunit TRMT61A OS=Schistosoma mansoni GN=Smp_194620 PE=3 SV=1	2	41.143	0.652956	16.8887	16.6266	16.1102	16.5418	15.6449	16.331	15.6907	15.8889
C7DPD5;G4VSY8	tr|C7DPD5|C7DPD5_SCHMA cAMP-dependent protein kinase catalytic subunit OS=Schistosoma mansoni PE=2 SV=1;tr|G4VSY8|G4VSY8_SCHMA Serine/threonine kinase OS=Schistosoma mansoni GN=Smp_152330 PE=3 SV=1	6	40.434	-0.945925	17.655	18.1586	18.6538	18.1558	19.7169	18.2717	19.3166	19.1017
C7T4Z2	tr|C7T4Z2|C7T4Z2_SCHMA Caspase-7 OS=Schistosoma mansoni PE=2 SV=1	5	36.305	1.80337	18.3238		16.6918	17.5078	16.1709	15.7664	15.1759	15.7044
E2EAJ1;G4VNM6	tr|E2EAJ1|E2EAJ1_SCHMA GDP-D-mannose-4,6-dehydratase OS=Schistosoma mansoni GN=GMD PE=2 SV=1;tr|G4VNM6|G4VNM6_SCHMA GDP-mannose 4,6-dehydratase OS=Schistosoma mansoni GN=Smp_153490 PE=3 SV=1	8	41.133	-0.943631	19.2787	19.7108	19.5639	19.5178	20.558	20.7311	20.0952	20.4614
E7BBH9;G4VLL9	tr|E7BBH9|E7BBH9_SCHMA cGMP-dependent protein kinase 1 OS=Schistosoma mansoni GN=cGK1 PE=2 SV=1;tr|G4VLL9|G4VLL9_SCHMA Serine/threonine kinase OS=Schistosoma mansoni GN=Smp_123290 PE=4 SV=1	14	114.99	-0.717766	15.5568	17.9021	18.6525	17.3705	18.2653	17.8477	18.1517	18.0882
E9LZR7;E9LZR8;G4VT44;G4VT45	tr|E9LZR7|E9LZR7_SCHMA Calmodulin 1 OS=Schistosoma mansoni PE=2 SV=1;tr|E9LZR8|E9LZR8_SCHMA Calmodulin 2 OS=Schistosoma mansoni PE=2 SV=1;tr|G4VT44|G4VT44_SCHMA Putative calmodulin OS=Schistosoma mansoni GN=Smp_026560.2 PE=4 SV=1;tr|G4VT45|G4VT45_SCHMA Put	6	16.807	-0.219816	22.3787	22.697	21.9218	22.3325	22.9082	23.0283	21.7204	22.5523
G4LU80	tr|G4LU80|G4LU80_SCHMA ATP-dependent RNA helicase, putative OS=Schistosoma mansoni GN=Smp_027970 PE=4 SV=1	6	88.105	0.101341	17.0034	16.8533	17.1193	16.992	17.0426	17.0451	16.5843	16.8907
G4LU81	tr|G4LU81|G4LU81_SCHMA Serine dehydratase, putative OS=Schistosoma mansoni GN=Smp_137330 PE=4 SV=1	14	103.5	0.137564	19.0293	19.3926	19.567	19.3296	18.4342	18.75	20.3919	19.1921
G4LU88	tr|G4LU88|G4LU88_SCHMA Uncharacterized protein OS=Schistosoma mansoni GN=Smp_168080 PE=4 SV=1	2	16.711	1.14829	19.0388	18.7939	18.2611	18.698	18.314	18.3717	15.9633	17.5497
G4LUA3	tr|G4LUA3|G4LUA3_SCHMA p25 alpha-related OS=Schistosoma mansoni GN=Smp_097490 PE=4 SV=1	11	19.049	-1.99432	22.9819	22.9262	22.6559	22.8547	24.9981	25.1342	24.4146	24.849
G4LUA8;G4LUA9	tr|G4LUA8|G4LUA8_SCHMA Protein RER1 OS=Schistosoma mansoni GN=Smp_019490.1 PE=3 SV=1;tr|G4LUA9|G4LUA9_SCHMA Protein RER1 OS=Schistosoma mansoni GN=Smp_019490.4 PE=3 SV=1	4	21.894	0.795216	19.844	19.9747	19.8097	19.8761	18.559	18.9256	19.7582	19.0809
G4LUB6	tr|G4LUB6|G4LUB6_SCHMA Translation factor sui1, putative OS=Schistosoma mansoni GN=Smp_019440 PE=4 SV=1	6	12.49	0.284116	22.7467	22.1197	21.9293	22.2652	21.8135	22.0044	22.1254	21.9811
G4LUB7	tr|G4LUB7|G4LUB7_SCHMA Uncharacterized protein OS=Schistosoma mansoni GN=Smp_019430 PE=4 SV=1	8	32.411	0.458147	21.0854	20.9793	20.3608	20.8085	20.3912	20.588	20.0719	20.3504
G4LUC1	tr|G4LUC1|G4LUC1_SCHMA Eukariotic translation initiation factor 2b,epsilon subunit, putative OS=Schistosoma mansoni GN=Smp_019380 PE=4 SV=1	7	85.415	-2.00561	14.9057	16.431	17.3124	16.2164	18.2946	17.6485	18.7229	18.222
G4LUC3	tr|G4LUC3|G4LUC3_SCHMA Uncharacterized protein OS=Schistosoma mansoni GN=Smp_019350 PE=4 SV=1	4	14.128	-0.477764	21.0764	23.2003	23.0399	22.4388	23.7042	22.28	22.7656	22.9166
G4LUC5	tr|G4LUC5|G4LUC5_SCHMA Fatty acid desaturase, putative OS=Schistosoma mansoni GN=Smp_132740 PE=4 SV=1	4	57.978	-2.03375			15.9108	15.9108	17.6619	17.8324	18.3393	17.9445
G4LUD1	tr|G4LUD1|G4LUD1_SCHMA mRNA-capping enzyme, putative OS=Schistosoma mansoni GN=Smp_132720.1 PE=4 SV=1	2	47.762	0.64916	17.6731	17.4904	17.4581	17.5405	16.9496	16.9264	16.7982	16.8914
G4LUD7	tr|G4LUD7|G4LUD7_SCHMA RuvB-like helicase OS=Schistosoma mansoni GN=Smp_132690 PE=3 SV=1	22	51.849	0.23697	22.8762	23.1984	23.3376	23.1374	22.8154	23.0007	22.8851	22.9004
G4LUD9	tr|G4LUD9|G4LUD9_SCHMA Myosin regulatory light chain, putative OS=Schistosoma mansoni GN=Smp_132670.1 PE=4 SV=1	9	22.719	0.175408	20.6289	21.3667	20.63	20.8752	21.1239	20.0452	20.9304	20.6998
G4LUE4	tr|G4LUE4|G4LUE4_SCHMA Protein CLP1 homolog OS=Schistosoma mansoni GN=Smp_019130 PE=3 SV=1	2	48.921	-1.1539	16.2818	16.0962	17.5777	16.6519	17.7281	17.899	17.7903	17.8058
G4LUE8;G4LUE7	tr|G4LUE8|G4LUE8_SCHMA Transmembrane gtpase mfn (Mitofusin 1) (Fzo homolog), putative OS=Schistosoma mansoni GN=Smp_132620.2 PE=3 SV=1;tr|G4LUE7|G4LUE7_SCHMA Transmembrane gtpase mfn (Mitofusin 1) (Fzo homolog), putative OS=Schistosoma mansoni GN=Smp_13262	10	87.486	-0.84708	17.3035	17.5583	17.7337	17.5318	18.2257	18.3572	18.5537	18.3789
G4LUE9	tr|G4LUE9|G4LUE9_SCHMA Eh domain containing/past-1-related OS=Schistosoma mansoni GN=Smp_019100 PE=3 SV=1	8	62.177	2.43066	17.6664	17.8752	18.1149	17.8855	14.864	16.0675	15.433	15.4548
G4LUF3	tr|G4LUF3|G4LUF3_SCHMA Hyaluronidase, putative OS=Schistosoma mansoni GN=Smp_000020 PE=4 SV=1	14	120.85	-0.0991146	19.205	18.8823	19.1477	19.0783	19.2954	18.7713	19.4656	19.1774
G4LUF6;G4LUF5;G4LUF4	tr|G4LUF6|G4LUF6_SCHMA 26s proteasome regulatory particle subunit,putative OS=Schistosoma mansoni GN=Smp_000030.1 PE=4 SV=1;tr|G4LUF5|G4LUF5_SCHMA 26s proteasome regulatory particle subunit,putative OS=Schistosoma mansoni GN=Smp_000030.2 PE=4 SV=1;tr|G4LUF	36	110.29	-0.473596	20.5251	21.0163	21.3379	20.9598	21.4221	21.1265	21.7515	21.4334
G4LUF7	tr|G4LUF7|G4LUF7_SCHMA Kinesin light chain, putative OS=Schistosoma mansoni GN=Smp_000040 PE=4 SV=1	18	47.158	0.0532276	21.0288	21.0152	20.89	20.978	20.7625	21.0471	20.9647	20.9248
G4LUG1	tr|G4LUG1|G4LUG1_SCHMA 1-acyl-sn-glycerol-3-phosphate acyltransferase OS=Schistosoma mansoni GN=Smp_000070 PE=3 SV=1	4	29.916	-0.760496	18.7193	18.7654	20.0189	19.1679	19.9646	19.5044	20.316	19.9284
G4LUG6	tr|G4LUG6|G4LUG6_SCHMA Uncharacterized protein Smp_127580 OS=Schistosoma mansoni GN=Smp_127580 PE=4 SV=1	10	71.639	-0.106269	16.2554	16.9957	17.2409	16.8307	17.3143	17.0319	16.4646	16.9369
G4LUG8	tr|G4LUG8|G4LUG8_SCHMA Uncharacterized protein Smp_010230 OS=Schistosoma mansoni GN=Smp_010230 PE=4 SV=1	10	34.765	-0.966395	22.2592	22.3967	22.0909	22.2489	23.2218	23.3514	23.0728	23.2153
G4LUH9	tr|G4LUH9|G4LUH9_SCHMA Translocon-associated protein, beta subunit (Trap-beta) (Signal sequence receptor beta subunit), putative OS=Schistosoma mansoni GN=Smp_009830 PE=4 SV=1	2	17.259	0.312147	18.8093	19.5317	19.2439	19.195	18.6572	18.8223	19.169	18.8828
G4LUI6	tr|G4LUI6|G4LUI6_SCHMA NADH-ubiquinone oxidoreductase fe-s protein 2 (Ndufs2), putative OS=Schistosoma mansoni GN=Smp_127340 PE=3 SV=1	17	76.516	0.0982872	20.4034	20.822	20.7033	20.6429	20.5379	20.5037	20.5923	20.5447
G4LUI7;G4LUI8	tr|G4LUI7|G4LUI7_SCHMA 14-3-3 protein, putative OS=Schistosoma mansoni GN=Smp_009780.1 PE=3 SV=1;tr|G4LUI8|G4LUI8_SCHMA 14-3-3 protein, putative OS=Schistosoma mansoni GN=Smp_009780.2 PE=3 SV=1	17	28.185	-0.0696067	24.8085	24.778	24.5042	24.6969	24.9368	24.7256	24.6371	24.7665
G4LUJ3	tr|G4LUJ3|G4LUJ3_SCHMA Uncharacterized protein OS=Schistosoma mansoni GN=Smp_121460 PE=4 SV=1	2	28.168	0.257194	17.3898	16.465	17.1939	17.0163	17.0791	16.5146	16.6835	16.7591
G4LUJ6;G4LUJ7	tr|G4LUJ6|G4LUJ6_SCHMA Proteasome subunit beta type OS=Schistosoma mansoni GN=Smp_121430.2 PE=3 SV=1;tr|G4LUJ7|G4LUJ7_SCHMA Proteasome subunit beta type OS=Schistosoma mansoni GN=Smp_121430.1 PE=3 SV=1	9	23.031	0.260845	22.8994	22.9438	22.5316	22.7916	22.5851	22.3491	22.658	22.5308
G4LUK0	tr|G4LUK0|G4LUK0_SCHMA Glycylpeptide N-tetradecanoyltransferase OS=Schistosoma mansoni GN=Smp_121420 PE=3 SV=1	9	53.053	-1.91187	16.5186	16.2195	15.4903	16.0761			17.988	17.988
G4LUK8;G4LUK7	tr|G4LUK8|G4LUK8_SCHMA NADH-ubiquinone oxidoreductase, putative OS=Schistosoma mansoni GN=Smp_038870.1 PE=3 SV=1;tr|G4LUK7|G4LUK7_SCHMA NADH-ubiquinone oxidoreductase, putative OS=Schistosoma mansoni GN=Smp_038870.2 PE=4 SV=1	24	76.207	0.387106	21.109	21.0609	21.4443	21.2047	20.9964	20.9169	20.5395	20.8176
G4LUM3;Q15ER4	tr|G4LUM3|G4LUM3_SCHMA Uncharacterized protein OS=Schistosoma mansoni GN=Smp_037290 PE=4 SV=1;tr|Q15ER4|Q15ER4_SCHMA Predicted actin-bundling protein-like protein OS=Schistosoma mansoni PE=2 SV=1	5	32.536	0.589785	19.0095	19.0067	18.0283	18.6815	17.7959	18.0182	18.4611	18.0917
G4LUP0	tr|G4LUP0|G4LUP0_SCHMA 26S proteasome subunit S9, putative OS=Schistosoma mansoni GN=Smp_061650 PE=4 SV=1	22	46.629	0.179209	23.0043	22.7343	22.5957	22.7781	22.4288	22.9149	22.453	22.5989
G4LUP2	tr|G4LUP2|G4LUP2_SCHMA Sp17 protein, putative OS=Schistosoma mansoni GN=Smp_155280 PE=4 SV=1	8	45.623	-2.7845		16.7726	15.201	15.9868	19.3043	19.097	17.9127	18.7713
G4LUP4	tr|G4LUP4|G4LUP4_SCHMA Protein farnesyltransferase alpha subunit,putative OS=Schistosoma mansoni GN=Smp_091770 PE=4 SV=1	4	19.931	0.184904	19.1247	19.1066	18.9509	19.0607	19.2666	19.3768	17.9841	18.8758
G4LUR0	tr|G4LUR0|G4LUR0_SCHMA Serine/threonine protein phosphatase 2a regulatory subunit A, putative OS=Schistosoma mansoni GN=Smp_172280 PE=4 SV=1	19	66.082	0.112384	21.5244	21.4795	21.5122	21.5054	21.5328	21.5431	21.1031	21.393
G4LUR1	tr|G4LUR1|G4LUR1_SCHMA Uncharacterized protein OS=Schistosoma mansoni GN=Smp_172300 PE=4 SV=1	2	10.881	0.316563	18.8062	18.0402	19.1514	18.6659	17.9601		18.7387	18.3494
G4LUR5	tr|G4LUR5|G4LUR5_SCHMA Ubiquitin-specific peptidase 14 (C19 family) OS=Schistosoma mansoni GN=Smp_084740 PE=3 SV=1	11	45.348	0.712245	21.4157	21.6053	21.515	21.512	20.7322	21.0611	20.606	20.7998
G4LUS4;G4LUS3	tr|G4LUS4|G4LUS4_SCHMA Uncharacterized protein OS=Schistosoma mansoni GN=Smp_154610.2 PE=4 SV=1;tr|G4LUS3|G4LUS3_SCHMA Uncharacterized protein OS=Schistosoma mansoni GN=Smp_154610.1 PE=4 SV=1	34	85.39	0.834749	23.7915	23.8395	23.9796	23.8702	23.0252	23.1304	22.9507	23.0355
G4LUU2	tr|G4LUU2|G4LUU2_SCHMA 60S ribosomal protein L18, putative OS=Schistosoma mansoni GN=Smp_031570 PE=4 SV=1	6	21.406	1.30982	21.4053	21.5892	20.6598	21.2181	18.9656	17.119	23.6402	19.9083
G4LUW0	tr|G4LUW0|G4LUW0_SCHMA Prohibitin, putative OS=Schistosoma mansoni GN=Smp_075940 PE=4 SV=1	10	23.133	0.779057	24.4834	24.3659	24.4815	24.4436	23.6139	23.7893	23.5903	23.6645
G4LUW3	tr|G4LUW3|G4LUW3_SCHMA Isocitrate dehydrogenase [NADP] OS=Schistosoma mansoni GN=Smp_163050 PE=3 SV=1	20	50.74	-0.15817	22.4128	22.2338	22.3315	22.326	22.5374	22.4724	22.4428	22.4842
G4LUX9	tr|G4LUX9|G4LUX9_SCHMA Serine/threonine protein phosphatase 2A regulatory subunit OS=Schistosoma mansoni GN=Smp_176600 PE=3 SV=1	9	71.887	0.536754	19.2598	19.2518	18.3066	18.9394	18.6821	17.6072	18.9187	18.4027
G4LUY0	tr|G4LUY0|G4LUY0_SCHMA DNA-directed rna polymerase II subunit,putative OS=Schistosoma mansoni GN=Smp_099170 PE=4 SV=1	9	30.166	1.03634	20.0344	19.9732	19.6841	19.8972	19.307	19.5395	17.7362	18.8609
G4LUY3	tr|G4LUY3|G4LUY3_SCHMA Serine/threonine kinase OS=Schistosoma mansoni GN=Smp_176620 PE=4 SV=1	9	127.37	0.0266948	13.6243	15.646	16.3018	15.1907	13.6219		16.7061	15.164
G4LUY4	tr|G4LUY4|G4LUY4_SCHMA Selenocysteine-specific elongation factor,putative OS=Schistosoma mansoni GN=Smp_176630 PE=4 SV=1	7	57.515	-1.28634	15.1723	17.9125	19.1535	17.4128	18.6568	18.7879	18.6527	18.6991
G4LUY9	tr|G4LUY9|G4LUY9_SCHMA Protein transport protein Sec23, putative OS=Schistosoma mansoni GN=Smp_099310 PE=4 SV=1	8	89.307	-0.136689	16.6808	17.6756	17.4604	17.2723	17.8299	16.6644	17.7326	17.4089
G4LUZ0	tr|G4LUZ0|G4LUZ0_SCHMA Eukaryotic translation initiation factor 3 subunit K OS=Schistosoma mansoni GN=Smp_099320 PE=3 SV=1	9	28.479	0.671652	21.6216	22.2419	21.92	21.9278	21.2676	21.513	20.988	21.2562
G4LUZ6	tr|G4LUZ6|G4LUZ6_SCHMA SPFH domain / Band 7 family protein,putative OS=Schistosoma mansoni GN=Smp_210110 PE=4 SV=1	7	49.91	-0.365865	18.8844	19.163	18.9373	18.9949	19.3768	19.38	19.3255	19.3608
G4LV10	tr|G4LV10|G4LV10_SCHMA Uncharacterized protein OS=Schistosoma mansoni GN=Smp_162140 PE=4 SV=1	6	28.558	-5.86656		15.0065		15.0065	20.7727	21.2309	20.6157	20.8731
G4LV14	tr|G4LV14|G4LV14_SCHMA Sh3-containing grb2-like protein 3 (Endophilin III) OS=Schistosoma mansoni GN=Smp_036990 PE=4 SV=1	2	41.663	0.28192	17.6019	17.3706	17.3606	17.4443			17.1624	17.1624
G4LV18;Q0JXE6;Q0JXE4	tr|G4LV18|G4LV18_SCHMA Uncharacterized protein OS=Schistosoma mansoni GN=Smp_142100 PE=4 SV=1;tr|Q0JXE6|Q0JXE6_SCHMA Transcriptional cofactor CA150 OS=Schistosoma mansoni GN=ca150 PE=2 SV=1;tr|Q0JXE4|Q0JXE4_SCHMA Transcriptional cofactor CA150 OS=Schistoso	36	242.43	0.398009	20.5964	20.1428	19.973	20.2374	19.7518	19.9353	19.831	19.8394
G4LV29	tr|G4LV29|G4LV29_SCHMA 28S ribosomal protein S16, mitochondrial,putative OS=Schistosoma mansoni GN=Smp_066480 PE=4 SV=1	5	28.522	2.30523	20.004	19.662	19.4673	19.7111	18.0714	16.8338	17.3125	17.4059
G4LV34	tr|G4LV34|G4LV34_SCHMA Camp-dependent protein kinase type II-alpha regulatory subunit, putative OS=Schistosoma mansoni GN=Smp_079010 PE=4 SV=1	15	42.996	-0.262737	21.7848	21.9316	21.6939	21.8034	22.1381	22.1978	21.8626	22.0662
G4LV39	tr|G4LV39|G4LV39_SCHMA Apoptosis inhibitor, putative OS=Schistosoma mansoni GN=Smp_197180 PE=4 SV=1	11	61.2	-1.36856	15.4478	15.5485	14.8687	15.2883	13.6935		19.6202	16.6569
G4LV40;G4LV41	tr|G4LV40|G4LV40_SCHMA 26S proteasome regulatory subunit S3, putative OS=Schistosoma mansoni GN=Smp_085310.2 PE=4 SV=1;tr|G4LV41|G4LV41_SCHMA 26S proteasome regulatory subunit S3, putative OS=Schistosoma mansoni GN=Smp_085310.1 PE=4 SV=1	22	57.793	-0.14974	21.686	22.049	22.2541	21.9964	22.2605	21.9498	22.2281	22.1461
G4LV42	tr|G4LV42|G4LV42_SCHMA 60S ribosomal protein L22, putative OS=Schistosoma mansoni GN=Smp_085300 PE=4 SV=1	4	15.41	2.63745	24.4675	23.9354	24.2979	24.2336	21.7306	22.56	20.4979	21.5961
G4LV45;G4LV43;G4LV44	tr|G4LV45|G4LV45_SCHMA Tropomyosin, putative OS=Schistosoma mansoni GN=Smp_085290.3 PE=4 SV=1;tr|G4LV43|G4LV43_SCHMA Tropomyosin, putative OS=Schistosoma mansoni GN=Smp_085290.1 PE=4 SV=1;tr|G4LV44|G4LV44_SCHMA Tropomyosin, putative OS=Schistosoma mansoni	2	23.254	0.0984778	18.4148		18.9429	18.6788	18.1027	18.9619	18.6765	18.5804
G4LV50	tr|G4LV50|G4LV50_SCHMA SEC23-interacting protein (P125),putative OS=Schistosoma mansoni GN=Smp_197190 PE=4 SV=1	7	121.92	0.197774	16.903	17.2155	16.3836	16.8341	16.6144		16.6582	16.6363
G4LV53	tr|G4LV53|G4LV53_SCHMA Interleukin enhancer binding factor, putative OS=Schistosoma mansoni GN=Smp_141000 PE=4 SV=1	4	42.151	0.657105	19.058	16.9753	19.9868	18.6734	17.7593	17.6834	18.6062	18.0163
G4LV54	tr|G4LV54|G4LV54_SCHMA Fer-1-related OS=Schistosoma mansoni GN=Smp_141010 PE=4 SV=1	40	219.17	-1.93784	17.5343	17.4066	17.9648	17.6352	19.7865	19.615	19.3177	19.5731
G4LV68;G4LV69	tr|G4LV68|G4LV68_SCHMA Mitochondrial processing peptidase non-peptidase alpha subunit (M16 family) OS=Schistosoma mansoni GN=Smp_094050.2 PE=3 SV=1;tr|G4LV69|G4LV69_SCHMA Mitochondrial processing peptidase non-peptidase alpha subunit (M16 family) OS=Schist	21	58.766	1.27106	22.2076	22.3227	22.5534	22.3612	20.9666	21.2194	21.0846	21.0902
G4LV70	tr|G4LV70|G4LV70_SCHMA Phenylalanyl-tRNA synthetase beta chain,putative OS=Schistosoma mansoni GN=Smp_094060 PE=4 SV=1	24	69.519	1.12579	21.7389	21.7931	21.1538	21.5619	20.4196	20.3466	20.5421	20.4361
G4LV71	tr|G4LV71|G4LV71_SCHMA Uncharacterized protein OS=Schistosoma mansoni GN=Smp_173670 PE=4 SV=1	2	27.505	0.351221	19.3039	19.2116	18.8031	19.1062	18.5673		18.9426	18.755
G4LV72	tr|G4LV72|G4LV72_SCHMA Uncharacterized protein OS=Schistosoma mansoni GN=Smp_173680 PE=4 SV=1	2	19.273	0.427635	19.5258	19.3266	19.9437	19.5987	18.6237		19.7184	19.1711
G4LV73	tr|G4LV73|G4LV73_SCHMA Uncharacterized protein OS=Schistosoma mansoni GN=Smp_173690 PE=4 SV=1	3	21.588	0.796764	20.3115	20.1796	20.631	20.374	19.7252	18.4444	20.5622	19.5772
G4LV78	tr|G4LV78|G4LV78_SCHMA Uncharacterized protein OS=Schistosoma mansoni GN=Smp_081440 PE=4 SV=1	3	22.758	1.52128	18.3556	17.513	18.2449	18.0378			16.5165	16.5165
G4LV80;G4LV81	tr|G4LV80|G4LV80_SCHMA 6-phosphogluconolactonase OS=Schistosoma mansoni GN=Smp_081460.3 PE=4 SV=1;tr|G4LV81|G4LV81_SCHMA 6-phosphogluconolactonase OS=Schistosoma mansoni GN=Smp_081460.1 PE=4 SV=1	8	26.621	0.148951	21.4818	21.5527	21.0914	21.3753	21.4313	21.5185	20.7293	21.2263
G4LV83	tr|G4LV83|G4LV83_SCHMA Uncharacterized protein OS=Schistosoma mansoni GN=Smp_166050 PE=4 SV=1	11	223.19	1.12581	17.6231	17.0387	17.6474	17.4364	15.6287		16.9925	16.3106
G4LV86	tr|G4LV86|G4LV86_SCHMA Striatin, putative OS=Schistosoma mansoni GN=Smp_166080.2 PE=4 SV=1	14	98.462	-0.763397	20.5565	20.4597	20.2916	20.4359	21.1019	21.3139	21.1822	21.1993
G4LV90	tr|G4LV90|G4LV90_SCHMA Eukaryotictranslation initiation factor,putative OS=Schistosoma mansoni GN=Smp_176040 PE=4 SV=1	4	95.365	1.12082	18.8688	18.3336	18.1314	18.4446	17.4777	17.3105	17.1832	17.3238
G4LV91	tr|G4LV91|G4LV91_SCHMA Uncharacterized protein OS=Schistosoma mansoni GN=Smp_192360 PE=4 SV=1	9	18.913	0.971811	22.596	22.9618	22.2413	22.5997	21.9495	21.7606	21.1735	21.6279
G4LV93	tr|G4LV93|G4LV93_SCHMA Ubiquitin ligase E3 alpha-related OS=Schistosoma mansoni GN=Smp_176060 PE=4 SV=1	8	295.29	-1.16661		12.3067	10.6499	11.4783	12.4884	11.9562	13.49	12.6449
G4LV96	tr|G4LV96|G4LV96_SCHMA Uncharacterized protein OS=Schistosoma mansoni GN=Smp_098090 PE=4 SV=1	6	33.057	2.3189	19.9227	19.641	19.9695	19.8444	19.0064	17.7946	15.7755	17.5255
G4LV97;B8Y6H6	tr|G4LV97|G4LV97_SCHMA Uncharacterized protein OS=Schistosoma mansoni GN=Smp_176080 PE=4 SV=1;tr|B8Y6H6|B8Y6H6_SCHMA DIF_8 (Fragment) OS=Schistosoma mansoni PE=2 SV=1	3	33.194	2.23805	18.1248	17.9406	17.1209	17.7288	15.5726		15.4088	15.4907
G4LV98	tr|G4LV98|G4LV98_SCHMA Fbxl4, putative OS=Schistosoma mansoni GN=Smp_176090 PE=4 SV=1	7	77.42	-3.39774		14.9565	15.2092	15.0829	18.1916	18.4257	18.8245	18.4806
G4LVA2	tr|G4LVA2|G4LVA2_SCHMA 60S ribosomal protein L35, putative OS=Schistosoma mansoni GN=Smp_197220 PE=4 SV=1	4	56.303	-1.35958	16.0101		18.1034	17.0568	18.7288	18.0644	18.4558	18.4163
G4LVA3	tr|G4LVA3|G4LVA3_SCHMA Adenylate kinase, putative OS=Schistosoma mansoni GN=Smp_197230 PE=3 SV=1	5	44.948	M only				N/A	18.377	19.2562	18.2331	18.6221
G4LVB5	tr|G4LVB5|G4LVB5_SCHMA Uncharacterized protein OS=Schistosoma mansoni GN=Smp_033660 PE=4 SV=1	4	48.992	0.548877	17.2825	18.1369	16.4286	17.2826	14.8795	17.0387	18.2831	16.7338
G4LVB6;G4LVC0;G4LVB9;G4LVB8;G4LVB7	tr|G4LVB6|G4LVB6_SCHMA ATP synthase gamma subunit, putative OS=Schistosoma mansoni GN=Smp_033670.5 PE=3 SV=1;tr|G4LVC0|G4LVC0_SCHMA ATP synthase gamma subunit, putative OS=Schistosoma mansoni GN=Smp_033670.4 PE=4 SV=1;tr|G4LVB9|G4LVB9_SCHMA ATP synthase su	8	32.088	0.386187	22.2911	23.2262	23.1154	22.8776	23.2524	22.1813	22.0404	22.4914
G4LVC1	tr|G4LVC1|G4LVC1_SCHMA Uncharacterized protein OS=Schistosoma mansoni GN=Smp_033680 PE=4 SV=1	3	32.608	1.60765	20.6651	19.3517	19.0928	19.7032	18.014	18.765	17.5076	18.0955
G4LVC5	tr|G4LVC5|G4LVC5_SCHMA DNA photolyase, putative OS=Schistosoma mansoni GN=Smp_033700 PE=4 SV=1	10	61.481	1.32442	19.0013	18.9018	19.2159	19.0397	18.0695	17.7167	17.3595	17.7152
G4LVC7;I6TRR3	tr|G4LVC7|G4LVC7_SCHMA DEAD box ATP-dependent RNA helicase, putative OS=Schistosoma mansoni GN=Smp_033710 PE=3 SV=1;tr|I6TRR3|I6TRR3_SCHMA Vasa-like DEAD-box RNA helicase OS=Schistosoma mansoni GN=vlg1 PE=2 SV=1	34	71.08	0.801411	22.9313	22.7494	22.7308	22.8038	22.1196	21.68	22.2077	22.0024
G4LVD1;G4LVD2	tr|G4LVD1|G4LVD1_SCHMA Uncharacterized protein OS=Schistosoma mansoni GN=Smp_033760.2 PE=4 SV=1;tr|G4LVD2|G4LVD2_SCHMA Uncharacterized protein OS=Schistosoma mansoni GN=Smp_033760.1 PE=4 SV=1	32	75.25	0.882456	23.3961	23.247	23.1408	23.2613	22.3369	22.5635	22.2362	22.3789
G4LVD3	tr|G4LVD3|G4LVD3_SCHMA Uncharacterized protein OS=Schistosoma mansoni GN=Smp_033770 PE=4 SV=1	8	104.68	1.33224	16.9694	16.9787	17.6604	17.2028			15.8706	15.8706
G4LVD6	tr|G4LVD6|G4LVD6_SCHMA 5-3 exoribonuclease, putative OS=Schistosoma mansoni GN=Smp_140420 PE=4 SV=1	6	188.1	0.0197701	14.0945	13.9824	15.2652	14.4474	14.0247		14.8306	14.4276
G4LVE0	tr|G4LVE0|G4LVE0_SCHMA Cleavage and polyadenylation specificity factor,putative OS=Schistosoma mansoni GN=Smp_211110 PE=4 SV=1	6	81.151	0.523204	19.2671	18.9005	19.1911	19.1195	18.6689	18.693	18.4271	18.5963
G4LVE1;O02197	tr|G4LVE1|G4LVE1_SCHMA Cleavage and polyadenylation specificity factor,putative OS=Schistosoma mansoni GN=Smp_211120 PE=4 SV=1;sp|O02197|CCA_SCHMA Circulating cathodic antigen OS=Schistosoma mansoni PE=1 SV=1	7	38.366	0.101013	19.6547	19.5774	19.202	19.4781	19.761	19.7338	18.6363	19.3771
G4LVE5	tr|G4LVE5|G4LVE5_SCHMA Arginine/serine-rich splicing factor, putative OS=Schistosoma mansoni GN=Smp_185230 PE=4 SV=1	11	23.244	0.707321	24.4381	24.2434	24.0656	24.249	23.6776	23.814	23.1335	23.5417
G4LVE7	tr|G4LVE7|G4LVE7_SCHMA ATP synthase f chain, mitochondrial-related OS=Schistosoma mansoni GN=Smp_140480 PE=4 SV=1	3	13.079	0.169884	21.3189	21.3637	21.1871	21.2899	21.2142	20.987	21.1589	21.12
G4LVF8	tr|G4LVF8|G4LVF8_SCHMA Uncharacterized protein OS=Schistosoma mansoni GN=Smp_066610.1 PE=4 SV=1	7	17.971	1.11458	21.6023	21.6287	21.2752	21.5021	20.3216	20.4882	20.3528	20.3875
G4LVF9	tr|G4LVF9|G4LVF9_SCHMA Mitochondrial ribosomal protein S25, putative OS=Schistosoma mansoni GN=Smp_066620 PE=4 SV=1	5	20.981	2.53392	18.391	19.3156	19.1321	18.9463	16.3866		16.4381	16.4123
G4LVG1;G4LVG0	tr|G4LVG1|G4LVG1_SCHMA Eukaryotic peptide chain release factor subunit,putative OS=Schistosoma mansoni GN=Smp_066630.1 PE=4 SV=1;tr|G4LVG0|G4LVG0_SCHMA Eukaryotic peptide chain release factor subunit,putative OS=Schistosoma mansoni GN=Smp_066630.2 PE=4 SV=	9	49.598	0.355147	19.9431	20.2046	20.3371	20.1616	19.8959	19.5935	19.9299	19.8064
G4LVG4	tr|G4LVG4|G4LVG4_SCHMA Syntaxin, putative OS=Schistosoma mansoni GN=Smp_066670.1 PE=3 SV=1	2	33.405	-1.91583	16.4637	15.9161	15.5826	15.9875	18.0308		17.7758	17.9033
G4LVG5	tr|G4LVG5|G4LVG5_SCHMA Fumarate hydratase OS=Schistosoma mansoni GN=Smp_158240 PE=4 SV=1	4	54.596	0.691626	18.4076	18.6748	18.4078	18.4967	18.1855	17.9938	17.236	17.8051
G4LVG9	tr|G4LVG9|G4LVG9_SCHMA Mitochondrial 60S ribosomal protein L7/L12,putative OS=Schistosoma mansoni GN=Smp_066740 PE=3 SV=1	3	20.099	1.0092	21.7037	21.6581	21.3091	21.557	20.8856	20.764	19.9936	20.5478
G4LVH2	tr|G4LVH2|G4LVH2_SCHMA DEAD box ATP-dependent RNA helicase, putative OS=Schistosoma mansoni GN=Smp_013790 PE=3 SV=1	24	85.415	-0.697167	20.8043	20.8523	21.0589	20.9052	21.8786	20.7586	22.1699	21.6023
G4LVH4	tr|G4LVH4|G4LVH4_SCHMA tRNA pseudouridine synthase D, putative OS=Schistosoma mansoni GN=Smp_129630 PE=4 SV=1	5	66.294	0.723566	15.8501	16.1261	16.4424	16.1395	15.9036		14.9284	15.416
G4LVH6;G4LVH5	tr|G4LVH6|G4LVH6_SCHMA Non-specific serine/threonine protein kinase OS=Schistosoma mansoni GN=Smp_013840.1 PE=4 SV=1;tr|G4LVH5|G4LVH5_SCHMA Non-specific serine/threonine protein kinase OS=Schistosoma mansoni GN=Smp_013840.2 PE=4 SV=1	5	122.12	0.407976	16.8483	17.1093	16.8856	16.9477	16.3725	16.5159	16.7309	16.5398
G4LVH9	tr|G4LVH9|G4LVH9_SCHMA Glutamate-cysteine ligase OS=Schistosoma mansoni GN=Smp_013860 PE=4 SV=1	8	50.442	0.407753	17.0819	18.57	18.2476	17.9665	18.1099	15.985	18.5813	17.5587
G4LVI6	tr|G4LVI6|G4LVI6_SCHMA Uncharacterized protein OS=Schistosoma mansoni GN=Smp_013970 PE=4 SV=1	2	33.305	0.281262	19.0062	18.9653	18.9085	18.96	18.5808	18.8524	18.6031	18.6787
G4LVI7	tr|G4LVI7|G4LVI7_SCHMA Uveal autoantigen with coiled-coil domains and ankyrin repeats protein, putative OS=Schistosoma mansoni GN=Smp_129710 PE=4 SV=1	25	169.11	-0.117604	19.0274	18.8669	19.1129	19.0024	18.9545	19.244	19.1615	19.12
G4LVI8	tr|G4LVI8|G4LVI8_SCHMA Adenylyl cyclase-associated protein OS=Schistosoma mansoni GN=Smp_014010 PE=3 SV=1	17	52.697	-0.91578	20.3759	21.029	21.2602	20.8884	21.9652	21.6618	21.7854	21.8042
G4LVJ1	tr|G4LVJ1|G4LVJ1_SCHMA Fuse-binding protein-interacting repressor siahbp1, putative OS=Schistosoma mansoni GN=Smp_129720 PE=4 SV=1	7	56.86	0.229824	18.7294	19.1111	19.4646	19.1017	19.0609	19.5302	18.0246	18.8719
G4LVJ6	tr|G4LVJ6|G4LVJ6_SCHMA DEAD box ATP-dependent RNA helicase, putative OS=Schistosoma mansoni GN=Smp_211330 PE=3 SV=1	20	51.728	-0.41749	20.3887	20.931	21.7484	21.0227	21.2353	20.5806	22.5048	21.4402
G4LVJ7	tr|G4LVJ7|G4LVJ7_SCHMA Uncharacterized protein OS=Schistosoma mansoni GN=Smp_210190 PE=4 SV=1	2	8.649	0.707719	22.0418	21.9658	21.6921	21.8999	21.2884	21.4832	20.805	21.1922
G4LVJ8	tr|G4LVJ8|G4LVJ8_SCHMA Uncharacterized protein OS=Schistosoma mansoni GN=Smp_210180 PE=4 SV=1	2	17.256	0.571245	17.0128	17.2757	18.1252	17.4712	15.5144		18.2856	16.9
G4LVK0	tr|G4LVK0|G4LVK0_SCHMA AMP deaminase, putative OS=Schistosoma mansoni GN=Smp_004120 PE=4 SV=1	5	69.341	2.08447	15.3915	15.7488	14.0126	15.051	12.925	13.7884	12.1861	12.9665
G4LVL0	tr|G4LVL0|G4LVL0_SCHMA Uncharacterized protein OS=Schistosoma mansoni GN=Smp_002380 PE=4 SV=1	7	30.846	-0.0606545	20.1028	19.7993	19.7367	19.8796	19.9535	20.2297	19.6376	19.9403
G4LVL7;G4LVL8;G4LVL9	tr|G4LVL7|G4LVL7_SCHMA Ribosome-binding protein 1 (Ribosome receptor protein) (MRRp), putative OS=Schistosoma mansoni GN=Smp_171540.3 PE=4 SV=1;tr|G4LVL8|G4LVL8_SCHMA Ribosome-binding protein 1 (Ribosome receptor protein) (MRRp), putative OS=Schistosoma ma	28	86.734	0.25641	21.0498	20.7703	20.6011	20.807	20.5031	20.8473	20.3015	20.5506
G4LVM1	tr|G4LVM1|G4LVM1_SCHMA Uncharacterized protein OS=Schistosoma mansoni GN=Smp_090370 PE=4 SV=1	11	31.793	1.47576	21.9111	21.4741	21.3412	21.5755	20.3392	20.4136	19.5462	20.0997
G4LVM3	tr|G4LVM3|G4LVM3_SCHMA Ribosomal protein L19 OS=Schistosoma mansoni GN=Smp_171570 PE=3 SV=1	14	99.843	1.85351	20.1301	19.8469	19.843	19.94	17.4493	15.0705	21.7397	18.0865
G4LVM8	tr|G4LVM8|G4LVM8_SCHMA Host cell factor (DHcf) OS=Schistosoma mansoni GN=Smp_090450 PE=4 SV=1	20	133.82	-1.02112	18.8862	18.792	18.6865	18.7882	19.8696	19.8741	19.6844	19.8094
G4LVM9	tr|G4LVM9|G4LVM9_SCHMA Uncharacterized protein OS=Schistosoma mansoni GN=Smp_122840 PE=4 SV=1	12	48.944	0.735056	21.39	21.1927	20.3017	20.9615	20.3902	20.2449	20.0441	20.2264
G4LVN0	tr|G4LVN0|G4LVN0_SCHMA Uncharacterized protein OS=Schistosoma mansoni GN=Smp_122830 PE=4 SV=1	9	125.71	0.259875	19.4044	19.233	18.6119	19.0831	18.8744	19.0105	18.5848	18.8232
G4LVN1	tr|G4LVN1|G4LVN1_SCHMA Uncharacterized protein OS=Schistosoma mansoni GN=Smp_122820 PE=4 SV=1	5	38.137	-3.85912		15.3559		15.3559	19.3911	20.0073	18.2465	19.215
G4LVP0;G4LVN9	tr|G4LVP0|G4LVP0_SCHMA Uridine cytidine kinase I, putative OS=Schistosoma mansoni GN=Smp_062260.1 PE=4 SV=1;tr|G4LVN9|G4LVN9_SCHMA Uridine cytidine kinase I, putative OS=Schistosoma mansoni GN=Smp_062260.2 PE=4 SV=1	8	27.768	1.60572	20.3151	19.6051	20.4362	20.1188	18.2883	18.7284	18.5226	18.5131
G4LVR3	tr|G4LVR3|G4LVR3_SCHMA Ndr family, putative OS=Schistosoma mansoni GN=Smp_000320 PE=4 SV=1	3	24.764	-1.16455		18.0238	16.8354	17.4296	18.7803	18.013	18.9892	18.5942
G4LVS4	tr|G4LVS4|G4LVS4_SCHMA Saposin containing protein OS=Schistosoma mansoni GN=Smp_000260 PE=4 SV=1	14	104.72	0.222893	20.8878	20.4129	19.2218	20.1742	20.9878	19.1752	19.6908	19.9513
G4LVS7;G4LVS6	tr|G4LVS7|G4LVS7_SCHMA Fusion OS=Schistosoma mansoni GN=Smp_000240.2 PE=4 SV=1;tr|G4LVS6|G4LVS6_SCHMA RNA binding protein, putative OS=Schistosoma mansoni GN=Smp_000240.1 PE=4 SV=1	6	53.295	0.766774	19.8567	20.6372	20.7016	20.3985	19.1869	19.6133	20.095	19.6318
G4LVT4	tr|G4LVT4|G4LVT4_SCHMA Oxidoreductase, short chain dehydrogenase/reductase family, putative OS=Schistosoma mansoni GN=Smp_000190 PE=3 SV=1	5	38.187	-0.561919	15.4309	17.9344	17.7825	17.0492	17.818	16.3228	18.6926	17.6112
G4LVT8	tr|G4LVT8|G4LVT8_SCHMA Uncharacterized protein OS=Schistosoma mansoni GN=Smp_122170 PE=4 SV=1	3	33.698	M only				N/A	19.1896	19.1656	18.3594	18.9048
G4LVU8	tr|G4LVU8|G4LVU8_SCHMA Filamin OS=Schistosoma mansoni GN=Smp_000100 PE=4 SV=1	31	251.42	0.0146112	18.8481	19.2397	18.6656	18.9178	19.2122	18.4362	19.0612	18.9032
G4LVU9	tr|G4LVU9|G4LVU9_SCHMA F-actin capping protein alpha, putative OS=Schistosoma mansoni GN=Smp_118830 PE=3 SV=1	10	33.659	-0.262726	19.6772	19.8945	20.3491	19.9736	20.2163	20.3402	20.1524	20.2363
G4LVV4;D6BNU5	tr|G4LVV4|G4LVV4_SCHMA PwLAP aminopeptidase (M17 family) OS=Schistosoma mansoni GN=Smp_083870 PE=4 SV=1;tr|D6BNU5|D6BNU5_SCHMA Leucine aminopeptidase 2 OS=Schistosoma mansoni PE=2 SV=1	25	59.706	0.21302	23.0897	23.0673	23.1149	23.0906	22.9467	22.7489	22.9372	22.8776
G4LVV8;G4LVV9	tr|G4LVV8|G4LVV8_SCHMA Uncharacterized protein OS=Schistosoma mansoni GN=Smp_167680.2 PE=4 SV=1;tr|G4LVV9|G4LVV9_SCHMA Uncharacterized protein OS=Schistosoma mansoni GN=Smp_167680.1 PE=4 SV=1	9	98.007	-1.416	15.8993	16.5855	16.5728	16.3525	17.3412	17.1263	18.8381	17.7685
G4LVW0	tr|G4LVW0|G4LVW0_SCHMA Ubiquitin-protein ligase,putative OS=Schistosoma mansoni GN=Smp_167690 PE=4 SV=1	28	393.56	-0.29482	16.0358	16.7876	16.7975	16.5403	16.8059	15.3408	18.3587	16.8351
G4LVX7	tr|G4LVX7|G4LVX7_SCHMA Vacuolar protein sorting (Vps33), putative OS=Schistosoma mansoni GN=Smp_069670 PE=3 SV=1	3	73.425	M only				N/A	16.4687	16.2133	15.9878	16.2233
G4LVX9;G4LVY0	tr|G4LVX9|G4LVX9_SCHMA Uncharacterized protein OS=Schistosoma mansoni GN=Smp_160000.2 PE=4 SV=1;tr|G4LVY0|G4LVY0_SCHMA Uncharacterized protein OS=Schistosoma mansoni GN=Smp_160000.1 PE=4 SV=1	7	202.13	-0.207153	15.0827	14.5169	15.4569	15.0188	14.787	15.0814	15.8096	15.226
G4LVY7	tr|G4LVY7|G4LVY7_SCHMA Uncharacterized protein Smp_210610 OS=Schistosoma mansoni GN=Smp_210610 PE=3 SV=1	10	60.138	-0.804534	19.3023	19.3401	19.6579	19.4334	20.2932	20.6208	19.7999	20.238
G4LVZ0	tr|G4LVZ0|G4LVZ0_SCHMA ADP-ribosylation factor-like 3, arl3 OS=Schistosoma mansoni GN=Smp_159930 PE=3 SV=1	7	26.554	-6.38331		15.438		15.438	21.7261	22.1013	21.6364	21.8213
G4LVZ1	tr|G4LVZ1|G4LVZ1_SCHMA Cadherin, putative OS=Schistosoma mansoni GN=Smp_159920 PE=4 SV=1	17	169.16	12.8093	25.1076	24.7912	25.1001	24.9996	12.738	11.6426		12.1903
G4LVZ3	tr|G4LVZ3|G4LVZ3_SCHMA Lamin, putative OS=Schistosoma mansoni GN=Smp_159900.1 PE=4 SV=1	52	744.47	0.0463999	20.5719	20.2739	20.3869	20.4109	20.3772	20.4903	20.2259	20.3645
G4LVZ9;G4LVZ8	tr|G4LVZ9|G4LVZ9_SCHMA Xpa-binding protein 1 (Mbdin), putative OS=Schistosoma mansoni GN=Smp_072790.1 PE=4 SV=1;tr|G4LVZ8|G4LVZ8_SCHMA Xpa-binding protein 1 (Mbdin), putative OS=Schistosoma mansoni GN=Smp_072790.2 PE=4 SV=1	4	42.02	2.28853	19.6381	19.3352	19.6617	19.545	17.8658	17.5472	16.3563	17.2564
G4LW08	tr|G4LW08|G4LW08_SCHMA Actin, putative OS=Schistosoma mansoni GN=Smp_072870 PE=3 SV=1	8	42.515	-0.269207	21.2317	21.2271	21.2268	21.2285	21.4904	21.4341	21.5687	21.4977
G4LW12;G4LW11	tr|G4LW12|G4LW12_SCHMA Hsp90 co-chaperone (Tebp), putative OS=Schistosoma mansoni GN=Smp_072900.1 PE=4 SV=1;tr|G4LW11|G4LW11_SCHMA Hsp90 co-chaperone (Tebp), putative OS=Schistosoma mansoni GN=Smp_072900.2 PE=4 SV=1	4	19.778	0.0755669	25.5702	25.8084	25.5272	25.6353	25.6296	25.8924	25.1571	25.5597
G4LW19	tr|G4LW19|G4LW19_SCHMA Cytoplasmic polyadenylation element binding protein (Cpeb), putative OS=Schistosoma mansoni GN=Smp_137460 PE=4 SV=1	7	44.885	F only	20.1504	20.2758	20.519	20.3151				N/A
G4LW21	tr|G4LW21|G4LW21_SCHMA Ubiquitin, putative OS=Schistosoma mansoni GN=Smp_120630 PE=4 SV=1	2	14.723	-0.258192	18.4277	17.9958	17.6012	18.0082	18.1801	17.7047	18.9144	18.2664
G4LW34	tr|G4LW34|G4LW34_SCHMA Tubulin beta chain,putative OS=Schistosoma mansoni GN=Smp_030730 PE=3 SV=1	3	46.066	-0.200843	24.5951	24.3685	24.2155	24.393	24.6577	24.5879	24.5361	24.5939
G4LW35	tr|G4LW35|G4LW35_SCHMA Histone deacetylase OS=Schistosoma mansoni GN=Smp_138770 PE=4 SV=1	10	128	-2.03327	14.0341	15.8227	15.7458	15.2009	17.808	17.7053	16.1891	17.2342
G4LW36	tr|G4LW36|G4LW36_SCHMA Serine/threonine-protein phosphatase OS=Schistosoma mansoni GN=Smp_030710 PE=3 SV=1	4	35.082	-1.5773	15.2122	16.072	16.8251	16.0365	17.4236	17.752	17.6657	17.6138
G4LW37	tr|G4LW37|G4LW37_SCHMA Uncharacterized protein OS=Schistosoma mansoni GN=Smp_138760 PE=4 SV=1	5	29.339	-0.387361	19.4152	19.9505	19.3949	19.5868	20.1639	20.2195	19.5392	19.9742
G4LW38	tr|G4LW38|G4LW38_SCHMA Elongation factor 1-beta, putative OS=Schistosoma mansoni GN=Smp_030690 PE=3 SV=1	15	23.958	0.946983	25.586	25.3302	25.0534	25.3232	24.5297	24.5856	24.0134	24.3762
G4LW49	tr|G4LW49|G4LW49_SCHMA Tetraspanin OS=Schistosoma mansoni GN=Smp_176870 PE=3 SV=1	1	39.23	M only				N/A	18.1082	17.9536	18.0972	18.053
G4LW62;G9HW09	tr|G4LW62|G4LW62_SCHMA Uncharacterized protein OS=Schistosoma mansoni GN=Smp_131810 PE=4 SV=1;tr|G9HW09|G9HW09_SCHMA Protein O-fucosyltransferase B OS=Schistosoma mansoni GN=POFucTB PE=2 SV=1	5	63.106	-2.63309			15.0682	15.0682	16.6707	18.2829	18.1501	17.7012
G4LW63	tr|G4LW63|G4LW63_SCHMA Protein kinase OS=Schistosoma mansoni GN=Smp_131800 PE=4 SV=1	4	68.84	0.115484	17.6026	18.159	18.1344	17.9654	18.6989	17.705	17.1457	17.8499
G4LW67	tr|G4LW67|G4LW67_SCHMA DEAD box ATP-dependent RNA helicase, putative OS=Schistosoma mansoni GN=Smp_131770 PE=4 SV=1	21	92.644	0.155136	19.3287	19.5019	19.8265	19.5524	19.4749	18.7534	19.9633	19.3972
G4LW68	tr|G4LW68|G4LW68_SCHMA Uncharacterized protein OS=Schistosoma mansoni GN=Smp_017450 PE=4 SV=1	5	38.214	1.21313	23.6016	23.061	22.8877	23.1834	22.0909	21.216	22.604	21.9703
G4LW82	tr|G4LW82|G4LW82_SCHMA Uncharacterized protein OS=Schistosoma mansoni GN=Smp_163030 PE=4 SV=1	6	57.641	-0.209141	17.0358	16.8138	17.8291	17.2262	18.1331	17.2558	16.9173	17.4354
G4LW83	tr|G4LW83|G4LW83_SCHMA Uncharacterized protein OS=Schistosoma mansoni GN=Smp_163040 PE=4 SV=1	29	282.11	-0.219049		14.319	17.5219	15.9205	16.2646	13.9982	18.1557	16.1395
G4LW91	tr|G4LW91|G4LW91_SCHMA Thimet oligopeptidase (M03 family) OS=Schistosoma mansoni GN=Smp_029500 PE=3 SV=1	44	77.687	-0.221322	23.2849	23.2023	23.1771	23.2214	23.5549	23.658	23.1154	23.4428
G4LW92	tr|G4LW92|G4LW92_SCHMA Uncharacterized protein OS=Schistosoma mansoni GN=Smp_138160 PE=4 SV=1	4	33.221	1.724	20.9825	20.6206	20.3869	20.6633	18.3967	19.3296	19.0917	18.9393
G4LW94	tr|G4LW94|G4LW94_SCHMA Thimet oligopeptidase (M03 family) OS=Schistosoma mansoni GN=Smp_029470 PE=3 SV=1	1	78.268	-0.910962	12.8218	14.3184	12.7177	13.286	14.9514	13.7683	13.8711	14.1969
G4LWA6	tr|G4LWA6|G4LWA6_SCHMA Dendritic cell protein, putative OS=Schistosoma mansoni GN=Smp_029410 PE=4 SV=1	7	28.277	0.950816	22.7956	22.5863	22.4236	22.6018	21.6242	21.9024	21.4265	21.651
G4LWA8	tr|G4LWA8|G4LWA8_SCHMA ATP synthase subunit beta vacuolar,putative OS=Schistosoma mansoni GN=Smp_029390 PE=3 SV=1	9	54.23	-0.733485	19.6837	19.9992	19.9258	19.8696	20.7089	20.8829	20.2174	20.603
G4LWA9	tr|G4LWA9|G4LWA9_SCHMA Uncharacterized protein OS=Schistosoma mansoni GN=Smp_029370 PE=4 SV=1	4	35.766	-0.168998	17.4259	17.8966	17.8621	17.7282	18.4289	17.4325	17.8302	17.8972
G4LWB9;G4LWC0	tr|G4LWB9|G4LWB9_SCHMA Arginine/serine-rich splicing factor, putative OS=Schistosoma mansoni GN=Smp_098890.1 PE=4 SV=1;tr|G4LWC0|G4LWC0_SCHMA Arginine/serine-rich splicing factor, putative OS=Schistosoma mansoni GN=Smp_098890.2 PE=4 SV=1	3	17.553	0.7533	24.2579	23.9197	23.8039	23.9938	23.462	23.129	23.1306	23.2405
G4LWC4;G4LWC5	tr|G4LWC4|G4LWC4_SCHMA Mps one binder kinase activator-like 3 (Mob1 homolog 3) (Mob3) OS=Schistosoma mansoni GN=Smp_105710.2 PE=4 SV=1;tr|G4LWC5|G4LWC5_SCHMA Mps one binder kinase activator-like 3 (Mob1 homolog 3) (Mob3) OS=Schistosoma mansoni GN=Smp_10571	4	21.938	-0.418968	19.4497	19.6625	19.3104	19.4742	20.0783	19.9141	19.6871	19.8932
G4LWC6	tr|G4LWC6|G4LWC6_SCHMA U520, putative OS=Schistosoma mansoni GN=Smp_105700 PE=4 SV=1	60	250.71	-0.285968	18.6764	19.0632	20.106	19.2819	19.5313	19.2826	19.8897	19.5678
G4LWC8;G4LWC9	tr|G4LWC8|G4LWC8_SCHMA Dolichyl-diphosphooligosaccharide--protein glycosyltransferase subunit 1 OS=Schistosoma mansoni GN=Smp_105680.1 PE=3 SV=1;tr|G4LWC9|G4LWC9_SCHMA Dolichyl-diphosphooligosaccharide--protein glycosyltransferase subunit 1 OS=Schistosoma	19	66.262	-0.804229	19.9664	21.1432	21.7532	20.9543	21.7019	21.9418	21.6318	21.7585
G4LWD1	tr|G4LWD1|G4LWD1_SCHMA Uncharacterized protein OS=Schistosoma mansoni GN=Smp_181220 PE=4 SV=1	6	19.208	0.944066	24.2104	23.7299	23.5423	23.8275	22.8569	22.932	22.8616	22.8835
G4LWD7	tr|G4LWD7|G4LWD7_SCHMA Ubiquitin-activating enzyme E1C, putative OS=Schistosoma mansoni GN=Smp_211070 PE=4 SV=1	8	48.823	-1.20982	16.8332	17.7492	17.7315	17.438	18.6982	18.2572	18.988	18.6478
G4LWE0	tr|G4LWE0|G4LWE0_SCHMA RWD domain-containing protein, putative OS=Schistosoma mansoni GN=Smp_022150 PE=4 SV=1	17	67.264	-1.36056	18.04	17.9294	17.3386	17.7693	18.962	19.0137	19.414	19.1299
G4LWE6	tr|G4LWE6|G4LWE6_SCHMA Sortilin OS=Schistosoma mansoni GN=Smp_179360 PE=4 SV=1	5	130.83	-0.189641	16.2419	16.2533	16.5306	16.3419	16.3164	16.6806	16.5977	16.5316
G4LWE7	tr|G4LWE7|G4LWE7_SCHMA Uncharacterized protein OS=Schistosoma mansoni GN=Smp_165870 PE=4 SV=1	6	28.228	1.12318	21.459	20.7956	21.187	21.1472	19.8305	19.8019	20.4397	20.024
G4LWF1	tr|G4LWF1|G4LWF1_SCHMA tRNA (guanine(26)-N(2))-dimethyltransferase OS=Schistosoma mansoni GN=Smp_165900.1 PE=3 SV=1	2	47.189	-0.147316	15.8914	16.2213	16.6509	16.2545	15.5761		17.2276	16.4019
G4LWG5;C5J9R9	tr|G4LWG5|G4LWG5_SCHMA Tyrosine-protein kinase OS=Schistosoma mansoni GN=Smp_006920 PE=3 SV=1;tr|C5J9R9|C5J9R9_SCHMA Tyrosine-protein kinase OS=Schistosoma mansoni GN=tk6 PE=2 SV=1	4	54.904	-1.53359	15.2907	16.3242	15.1145	15.5765	17.109	17.9752	16.2461	17.1101
G4LWI2	tr|G4LWI2|G4LWI2_SCHMA Heat shock protein HSP60, putative OS=Schistosoma mansoni GN=Smp_008545 PE=3 SV=1	41	59.554	-0.178428	26.7199	26.5305	26.8075	26.6859	26.8358	27.1738	26.5835	26.8644
G4LWI3	tr|G4LWI3|G4LWI3_SCHMA Aldehyde dehydrogenase,putative OS=Schistosoma mansoni GN=Smp_050390 PE=3 SV=1	28	53.762	-0.734287	26.1798	26.657	26.1153	26.3174	27.0337	26.7389	27.3823	27.0517
G4LWI9;G4LWI7;G4LWI8;G4LWI6	tr|G4LWI9|G4LWI9_SCHMA Vacuolar protein sorting-associated protein 29 OS=Schistosoma mansoni GN=Smp_050350.1 PE=3 SV=1;tr|G4LWI7|G4LWI7_SCHMA Vacuolar protein sorting-associated protein 29 OS=Schistosoma mansoni GN=Smp_050350.3 PE=3 SV=1;tr|G4LWI8|G4LWI8_S	3	16.166	-0.852023	17.9117	18.2217	16.4098	17.5144	18.4641	18.2977	18.3374	18.3664
G4LWJ8;G4LWJ9	tr|G4LWJ8|G4LWJ8_SCHMA Xtp3-transactivated protein B, putative OS=Schistosoma mansoni GN=Smp_149050.1 PE=4 SV=1;tr|G4LWJ9|G4LWJ9_SCHMA Xtp3-transactivated protein B, putative OS=Schistosoma mansoni GN=Smp_149050.2 PE=4 SV=1	2	55.913	-0.961303			15.8665	15.8665	16.7907	16.1238	17.5689	16.8278
G4LWK0	tr|G4LWK0|G4LWK0_SCHMA 60S ribosomal protein L31, putative OS=Schistosoma mansoni GN=Smp_050280 PE=4 SV=1	3	14.113	0.399157	22.0497	21.2628	21.8275	21.7134	20.9795	20.5286	22.4346	21.3142
G4LWK2	tr|G4LWK2|G4LWK2_SCHMA Phosphorylase B kinase alpha, kpb1, putative OS=Schistosoma mansoni GN=Smp_149040 PE=4 SV=1	5	146.72	-1.23959	13.5067	15.4522	14.3276	14.4288	16.376	14.7345	15.8947	15.6684
G4LWK3	tr|G4LWK3|G4LWK3_SCHMA Uncharacterized protein OS=Schistosoma mansoni GN=Smp_050250 PE=4 SV=1	10	47.334	0.67257	21.6418	21.4049	21.2159	21.4208	20.718	20.9282	20.5986	20.7483
G4LWK5	tr|G4LWK5|G4LWK5_SCHMA Lim domain binding protein, putative OS=Schistosoma mansoni GN=Smp_149020 PE=4 SV=1	2	157.8	1.9168	14.444	14.8841	14.9721	14.7667	12.8499			12.8499
G4LWK8	tr|G4LWK8|G4LWK8_SCHMA Protein phosphatase 2C, putative OS=Schistosoma mansoni GN=Smp_149000 PE=4 SV=1	3	85.043	-2.41944		14.0506	13.9827	14.0167	16.6429	16.6223	16.0431	16.4361
G4LWK9	tr|G4LWK9|G4LWK9_SCHMA Nucleolar protein NOP56, putative OS=Schistosoma mansoni GN=Smp_148990 PE=4 SV=1	16	73.536	2.06974	22.351	22.185	22.4015	22.3125	20.2685	19.6228	20.837	20.2428
G4LWL3	tr|G4LWL3|G4LWL3_SCHMA Uncharacterized protein OS=Schistosoma mansoni GN=Smp_050130 PE=4 SV=1	3	37.74	-1.63671	17.4268	16.4001	18.0667	17.2978	18.8538	19.4298	18.5201	18.9346
G4LWL6	tr|G4LWL6|G4LWL6_SCHMA NAD dehydrogenase, putative OS=Schistosoma mansoni GN=Smp_050080 PE=4 SV=1	21	49.727	0.190946	22.1583	22.2793	22.6458	22.3612	22.0787	22.2764	22.1556	22.1702
G4LWM1	tr|G4LWM1|G4LWM1_SCHMA FACT complex subunit SSRP1 OS=Schistosoma mansoni GN=Smp_148930 PE=3 SV=1	19	72.069	-0.200112	20.5326	20.7704	20.9152	20.7394	20.9923	21.0898	20.7365	20.9395
G4LWM2	tr|G4LWM2|G4LWM2_SCHMA Uncharacterized protein OS=Schistosoma mansoni GN=Smp_172090 PE=4 SV=1	5	34.578	0.882381	18.262	18.394	18.7931	18.483	17.621	18.3771	16.8038	17.6006
G4LWM4	tr|G4LWM4|G4LWM4_SCHMA Casp, putative OS=Schistosoma mansoni GN=Smp_049990 PE=4 SV=1	3	81.04	0.77192		13.3393	13.5173	13.4283	12.4133	13.3489	12.2069	12.6564
G4LWM5;G4LWM7;G4LWM6	tr|G4LWM5|G4LWM5_SCHMA Zinc finger protein, putative OS=Schistosoma mansoni GN=Smp_049970.1 PE=4 SV=1;tr|G4LWM7|G4LWM7_SCHMA Zinc finger protein, putative OS=Schistosoma mansoni GN=Smp_049970.4 PE=4 SV=1;tr|G4LWM6|G4LWM6_SCHMA Zinc finger protein, putative	1	24.846	1.55221	19.1694	18.768	18.4425	18.7933	16.7978	17.6844		17.2411
G4LWN2;G4LWN3	tr|G4LWN2|G4LWN2_SCHMA Importin 9 (Imp9) (Ran-binding protein 9),putative OS=Schistosoma mansoni GN=Smp_049920.1 PE=4 SV=1;tr|G4LWN3|G4LWN3_SCHMA Importin 9 (Imp9) (Ran-binding protein 9),putative OS=Schistosoma mansoni GN=Smp_049920.3 PE=4 SV=1	5	93.286	0.809653	16.5388	17.1253	17.1667	16.9436	15.4281	15.5192	17.4545	16.1339
G4LWN8	tr|G4LWN8|G4LWN8_SCHMA Nuclear pore glycoprotein P62, putative OS=Schistosoma mansoni GN=Smp_049880 PE=4 SV=1	6	54.511	0.563504	19.363	18.7452	19.3791	19.1624	18.6069	18.8138	18.376	18.5989
G4LWP3	tr|G4LWP3|G4LWP3_SCHMA Uncharacterized protein OS=Schistosoma mansoni GN=Smp_148800 PE=4 SV=1	7	18.461	0.828491	22.7049	22.3732	21.5082	22.1954	21.3438	22.2446	20.5124	21.367
G4LWP4	tr|G4LWP4|G4LWP4_SCHMA Laminin beta chain-related OS=Schistosoma mansoni GN=Smp_148790 PE=4 SV=1	29	196.58	-1.57615	17.776	17.8695	18.2864	17.9773	19.996	19.7079	18.9564	19.5534
G4LWP8	tr|G4LWP8|G4LWP8_SCHMA Ribose-5-phosphate isomerase, putative OS=Schistosoma mansoni GN=Smp_148770 PE=4 SV=1	7	28.232	4.54383	21.1863	21.1878	20.6531	21.0091	16.3499	17.0147	16.0312	16.4653
G4LWQ0	tr|G4LWQ0|G4LWQ0_SCHMA Uncharacterized protein OS=Schistosoma mansoni GN=Smp_198230 PE=4 SV=1	4	228.22	-1.36088		14.7875		14.7875	15.9304	16.1773	16.3373	16.1483
G4LWQ1	tr|G4LWQ1|G4LWQ1_SCHMA Hypoxanthine-guanine phosphoribosyltransferase,putative OS=Schistosoma mansoni GN=Smp_168500 PE=4 SV=1	5	26.018	0.432394	20.2833	19.1887	17.5219	18.9979	19.3075	18.0653	18.3238	18.5655
G4LWQ2;P09383	tr|G4LWQ2|G4LWQ2_SCHMA Hypoxanthine phosphoribosyltransferase OS=Schistosoma mansoni GN=Smp_103560 PE=3 SV=1;sp|P09383|HPRT_SCHMA Hypoxanthine-guanine phosphoribosyltransferase OS=Schistosoma mansoni GN=HGPRT PE=1 SV=1	11	28.037	-0.550705	21.474	21.4684	21.2231	21.3885	21.9598	22.0816	21.7763	21.9392
G4LWQ3	tr|G4LWQ3|G4LWQ3_SCHMA Syntaxin, putative OS=Schistosoma mansoni GN=Smp_179930 PE=3 SV=1	2	31.913	0.504378	16.7636	15.8208		16.2922	15.2326	16.0227	16.1081	15.7878
G4LWR1	tr|G4LWR1|G4LWR1_SCHMA Uncharacterized protein OS=Schistosoma mansoni GN=Smp_157250 PE=4 SV=1	9	54.565	1.07111	16.6089	16.9601	16.0508	16.5399			15.4688	15.4688
G4LWR6;C0MP97	tr|G4LWR6|G4LWR6_SCHMA Diaphanous, putative OS=Schistosoma mansoni GN=Smp_068720 PE=4 SV=1;tr|C0MP97|C0MP97_SCHMA Formin-homology protein SmDia OS=Schistosoma mansoni GN=SmDia PE=2 SV=1	13	119.42	0.313562	18.325	17.8816	17.6425	17.9497	17.3756	17.5076	18.0252	17.6361
G4LWS5	tr|G4LWS5|G4LWS5_SCHMA Uncharacterized protein OS=Schistosoma mansoni GN=Smp_113740 PE=4 SV=1	3	13.483	1.58302	20.7157	19.8543	20.5752	20.3817	18.8929	19.1822	18.321	18.7987
G4LWS6	tr|G4LWS6|G4LWS6_SCHMA Uncharacterized protein OS=Schistosoma mansoni GN=Smp_039080 PE=4 SV=1	1	39.432	-0.277379	16.0585	16.018		16.0382	16.3342	16.3156	16.297	16.3156
G4LWT1	tr|G4LWT1|G4LWT1_SCHMA ATP synthase delta chain, putative OS=Schistosoma mansoni GN=Smp_039000 PE=3 SV=1	10	22.778	0.183533	22.497	22.6796	22.5245	22.567	22.6133	22.1948	22.3425	22.3835
G4LWT4	tr|G4LWT4|G4LWT4_SCHMA Cell division control protein, putative OS=Schistosoma mansoni GN=Smp_129320 PE=4 SV=1	11	109.48	0.715206	19.0342	18.6486	18.1296	18.6041	17.6447	18.1334	17.8887	17.8889
G4LWU9	tr|G4LWU9|G4LWU9_SCHMA Uncharacterized protein OS=Schistosoma mansoni GN=Smp_144680 PE=4 SV=1	8	45.59	-4.52779	15.5701		14.2276	14.8989	19.4985	19.2662	19.5153	19.4267
G4LWV6	tr|G4LWV6|G4LWV6_SCHMA Uncharacterized protein OS=Schistosoma mansoni GN=Smp_041370 PE=4 SV=1	2	85.224	-2.89427		13.434	14.5279	13.981	16.8074	17.0406	16.7777	16.8752
G4LWW0	tr|G4LWW0|G4LWW0_SCHMA 14-3-3 protein, putative OS=Schistosoma mansoni GN=Smp_041430.1 PE=3 SV=1	9	27.963	-0.465248	20.6739	20.4424	20.2939	20.47	20.9456	21.1721	20.6882	20.9353
G4LWW1	tr|G4LWW1|G4LWW1_SCHMA Aspartyl-tRNA synthetase, putative OS=Schistosoma mansoni GN=Smp_041450 PE=4 SV=1	30	61.244	0.0776949	22.7226	22.8333	23.1721	22.9093	22.5925	22.9333	22.9691	22.8316
G4LWW2	tr|G4LWW2|G4LWW2_SCHMA Tetraspanin, putative OS=Schistosoma mansoni GN=Smp_041460 PE=3 SV=1	5	30.43	-0.828498	20.9062	20.8319	20.9983	20.9121	21.8247	22.3492	21.048	21.7406
G4LWW4	tr|G4LWW4|G4LWW4_SCHMA Uncharacterized protein OS=Schistosoma mansoni GN=Smp_144770 PE=4 SV=1	3	104.38	1.26577	14.1459	14.8463	15.7776	14.9233			13.6575	13.6575
G4LWW5;G4LWW6;G4LWW7	tr|G4LWW5|G4LWW5_SCHMA Rna recognition motif (Rrm) domain containing protein, putative OS=Schistosoma mansoni GN=Smp_041480.3 PE=4 SV=1;tr|G4LWW6|G4LWW6_SCHMA Rna recognition motif (Rrm) domain containing protein, putative OS=Schistosoma mansoni GN=Smp_041	6	63.1	0.644674	20.9008	20.67	20.7481	20.773	20.2761	20.0514	20.0574	20.1283
G4LWW9	tr|G4LWW9|G4LWW9_SCHMA Uncharacterized protein OS=Schistosoma mansoni GN=Smp_041500 PE=4 SV=1	1	16.199	-0.448861	17.2286	18.0736	18.2733	17.8585	18.2453	18.3694		18.3074
G4LWX2	tr|G4LWX2|G4LWX2_SCHMA Uncharacterized protein OS=Schistosoma mansoni GN=Smp_144790 PE=4 SV=1	1	11.254	-0.970093	19.3041	19.1515	19.3841	19.2799	20.4829	20.2374	20.0296	20.25
G4LWX4	tr|G4LWX4|G4LWX4_SCHMA Ormdl proteins, putative OS=Schistosoma mansoni GN=Smp_210370 PE=4 SV=1	24	80.038	-0.940219	19.7573	20.2555	21.3415	20.4514	21.2837	21.4608	21.4303	21.3916
G4LWX6	tr|G4LWX6|G4LWX6_SCHMA Uncharacterized protein OS=Schistosoma mansoni GN=Smp_041550 PE=4 SV=1	2	16.693	0.507797		18.3553	17.8195	18.0874	17.5109	17.1749	18.0531	17.5796
G4LWX9	tr|G4LWX9|G4LWX9_SCHMA Splicing factor 3B subunit 3, 5 OS=Schistosoma mansoni GN=Smp_137430 PE=4 SV=1	26	118.9	-0.266411	19.6263	20.0214	20.6264	20.0914	20.3746	20.5321	20.1666	20.3578
G4LWY0;I0B503	tr|G4LWY0|G4LWY0_SCHMA S-methyl-5-thioadenosine phosphorylase OS=Schistosoma mansoni GN=Smp_028190 PE=3 SV=1;tr|I0B503|I0B503_SCHMA S-methyl-5-thioadenosine phosphorylase OS=Schistosoma mansoni PE=1 SV=1	11	32.661	-1.86987	22.1428	22.2645	22.2587	22.222	24.0682	24.4373	23.7701	24.0919
G4LWY1	tr|G4LWY1|G4LWY1_SCHMA Troponin I (TnI), putative OS=Schistosoma mansoni GN=Smp_028200 PE=4 SV=1	6	98.369	-1.24695	16.634	16.4472	14.301	15.7941	17.1777	16.9345	17.0108	17.041
G4LWY6	tr|G4LWY6|G4LWY6_SCHMA HMG-CoA synthase OS=Schistosoma mansoni GN=Smp_198690 PE=4 SV=1	7	36.55	0.411798	18.2337	18.8647	18.5852	18.5612	17.2819	18.8329	18.3334	18.1494
G4LWY7	tr|G4LWY7|G4LWY7_SCHMA DUF814 domain protein OS=Schistosoma mansoni GN=Smp_028330 PE=4 SV=1	4	24.216	-2.0483	19.7183	19.6129	19.1226	19.4846	21.7492	21.7322	21.1172	21.5329
G4LWY8	tr|G4LWY8|G4LWY8_SCHMA Brix domain containing protein, putative OS=Schistosoma mansoni GN=Smp_028340 PE=4 SV=1	6	39.214	0.632869	15.9443	15.2218	16.0285	15.7315	13.2012		16.9961	15.0987
G4LX00	tr|G4LX00|G4LX00_SCHMA Disulfide oxidoreductase, putative OS=Schistosoma mansoni GN=Smp_137540 PE=4 SV=1	16	76.125	0.308689	21.2043	21.1332	21.5727	21.3034	20.8494	21.1269	21.0078	20.9947
G4LX03;G4LX02	tr|G4LX03|G4LX03_SCHMA Adenosylhomocysteinase OS=Schistosoma mansoni GN=Smp_028440.1 PE=3 SV=1;tr|G4LX02|G4LX02_SCHMA Adenosylhomocysteinase,putative OS=Schistosoma mansoni GN=Smp_028440.2 PE=4 SV=1	19	47.528	-0.104409	23.8948	23.8214	23.796	23.8374	23.8821	24.247	23.6964	23.9418
G4LX09	tr|G4LX09|G4LX09_SCHMA Helicase, putative OS=Schistosoma mansoni GN=Smp_137580 PE=4 SV=1	31	149.17	-2.67772	13.9866	16.5997	17.5226	16.0363	18.7203	17.0109	20.4109	18.714
G4LX20;G4LX19	tr|G4LX20|G4LX20_SCHMA Uncharacterized protein OS=Schistosoma mansoni GN=Smp_075440.3 PE=4 SV=1;tr|G4LX19|G4LX19_SCHMA Uncharacterized protein OS=Schistosoma mansoni GN=Smp_075440.1 PE=4 SV=1	3	48.414	-1.05926	15.0792	15.8791	14.4115	15.1233	16.6777	15.834	16.0359	16.1825
G4LX38	tr|G4LX38|G4LX38_SCHMA Vesicle docking protein P115, putative OS=Schistosoma mansoni GN=Smp_168660 PE=4 SV=1	2	105.73	0.956906	13.9068	14.3874	15.3185	14.5376	15.1636		11.9977	13.5806
G4LX40;G4LX41	tr|G4LX40|G4LX40_SCHMA Cop9 complex subunit, putative OS=Schistosoma mansoni GN=Smp_085640.2 PE=4 SV=1;tr|G4LX41|G4LX41_SCHMA Cop9 complex subunit, putative OS=Schistosoma mansoni GN=Smp_085640.1 PE=4 SV=1	12	43.289	0.00351526	21.0982	21.1044	20.927	21.0432	21.1087	21.329	20.6814	21.0397
G4LX43	tr|G4LX43|G4LX43_SCHMA Exosome complex exonuclease RRP43, putative OS=Schistosoma mansoni GN=Smp_045730 PE=4 SV=1	2	33.977	0.22302	17.5486	17.4867	17.0914	17.3756	16.838	17.4671		17.1526
G4LX53	tr|G4LX53|G4LX53_SCHMA 26S proteasome non-ATPase regulatory subunit 7 (M67 family) OS=Schistosoma mansoni GN=Smp_026630 PE=4 SV=1	11	40.243	0.471417	21.873	21.8051	21.9651	21.881	21.4006	21.3399	21.4883	21.4096
G4LX57	tr|G4LX57|G4LX57_SCHMA 60S ribosomal protein L38, putative OS=Schistosoma mansoni GN=Smp_058720.1 PE=3 SV=1	5	9.5872	0.890058	23.358	23.343	23.4596	23.3869	22.5698	22.69	22.2306	22.4968
G4LX58	tr|G4LX58|G4LX58_SCHMA Uncharacterized protein OS=Schistosoma mansoni GN=Smp_153730 PE=4 SV=1	1	44.925	2.50493	17.0163	16.6915	17.011	16.9063	14.4013			14.4013
G4LX62;G4LX63	tr|G4LX62|G4LX62_SCHMA Ribosome biogenesis regulatory protein,putative OS=Schistosoma mansoni GN=Smp_058680.2 PE=4 SV=1;tr|G4LX63|G4LX63_SCHMA Ribosome biogenesis regulatory protein,putative OS=Schistosoma mansoni GN=Smp_058680.1 PE=4 SV=1	9	31.006	2.73663	20.8762	20.1944	20.0906	20.3871	17.1035		18.1974	17.6504
G4LX66	tr|G4LX66|G4LX66_SCHMA Proteasome regulatory subunit-related OS=Schistosoma mansoni GN=Smp_058650 PE=4 SV=1	19	52.219	-0.173257	21.3433	21.6484	21.6195	21.5371	21.4693	21.9587	21.7029	21.7103
G4LX70	tr|G4LX70|G4LX70_SCHMA Protein phosphatase 1 binding protein, putative OS=Schistosoma mansoni GN=Smp_153700 PE=4 SV=1	2	78.001	M only				N/A	15.2286	15.1085	15.0885	15.1419
G4LX81	tr|G4LX81|G4LX81_SCHMA Eukaryotic translation initiation factor 3 subunit B OS=Schistosoma mansoni GN=Smp_058460 PE=3 SV=1	31	76.711	1.02684	21.9752	21.892	21.8915	21.9195	20.8516	21.0777	20.7488	20.8927
G4LX83	tr|G4LX83|G4LX83_SCHMA Uncharacterized protein OS=Schistosoma mansoni GN=Smp_153630 PE=4 SV=1	1	11.403	0.111768	18.7209	18.3905	17.7252	18.2789	18.1671			18.1671
G4LX85	tr|G4LX85|G4LX85_SCHMA Chromatin assembly factor I P60 subunit,putative OS=Schistosoma mansoni GN=Smp_153610 PE=4 SV=1	4	63.65	-0.311222	17.5987	17.5051	17.5895	17.5645	17.7359	18.2308	17.6603	17.8757
G4LX86	tr|G4LX86|G4LX86_SCHMA Uncharacterized protein OS=Schistosoma mansoni GN=Smp_058410 PE=4 SV=1	3	79.141	0.229788	16.4322	16.2725	15.7572	16.154	15.2963	15.9653	16.511	15.9242
G4LX89	tr|G4LX89|G4LX89_SCHMA Cofilin, actophorin, putative OS=Schistosoma mansoni GN=Smp_120700.1 PE=3 SV=1	5	15.726	-0.0407956	20.8301	21.5349	21.2978	21.2209	21.4968	21.2788	21.0096	21.2617
G4LX94	tr|G4LX94|G4LX94_SCHMA Uncharacterized protein OS=Schistosoma mansoni GN=Smp_083240 PE=4 SV=1	4	17.269	0.748855	19.5923	20.137	18.0074	19.2456	17.72	18.7197	19.0505	18.4967
G4LX95	tr|G4LX95|G4LX95_SCHMA Uncharacterized protein OS=Schistosoma mansoni GN=Smp_167290 PE=4 SV=1	10	198.23	1.7139	15.0719	15.0745	16.3159	15.4874	13.4064	14.1545	13.7598	13.7735
G4LX99	tr|G4LX99|G4LX99_SCHMA Succinyl-CoA synthetase beta chain, putative OS=Schistosoma mansoni GN=Smp_167330 PE=4 SV=1	8	37.517	-0.581137	19.472	20.0548	20.0782	19.8683	20.5997	20.721	20.0277	20.4494
G4LXA0;G4LXA3;G4LXA1;G4LXA4;G4LXA2	tr|G4LXA0|G4LXA0_SCHMA Uncharacterized protein OS=Schistosoma mansoni GN=Smp_083340.5 PE=4 SV=1;tr|G4LXA3|G4LXA3_SCHMA Uncharacterized protein OS=Schistosoma mansoni GN=Smp_083340.3 PE=4 SV=1;tr|G4LXA1|G4LXA1_SCHMA Uncharacterized protein OS=Schistosoma ma	5	111.86	0.982211	19.0689	18.5948	18.8058	18.8232	17.7116	17.7907	18.0206	17.841
G4LXB1	tr|G4LXB1|G4LXB1_SCHMA Elongation factor 1-gamma, putative OS=Schistosoma mansoni GN=Smp_083410 PE=4 SV=1	16	47.573	0.562172	24.7133	24.9947	25.1396	24.9492	24.4965	24.1054	24.5593	24.3871
G4LXB4	tr|G4LXB4|G4LXB4_SCHMA Uncharacterized protein OS=Schistosoma mansoni GN=Smp_097620 PE=4 SV=1	2	20.836	0.697809	18.0734	18.4788	18.1233	18.2252	17.6773	17.7505	17.1543	17.5274
G4LXB6	tr|G4LXB6|G4LXB6_SCHMA DEAD box ATP-dependent RNA helicase, putative OS=Schistosoma mansoni GN=Smp_097660 PE=4 SV=1	24	44.285	-0.656307	23.0759	23.7816	24.2201	23.6925	24.3935	24.5213	24.1317	24.3488
G4LXC0	tr|G4LXC0|G4LXC0_SCHMA Uncharacterized protein OS=Schistosoma mansoni GN=Smp_097710 PE=4 SV=1	11	39.024	-0.614834	19.2503	19.1768	19.4595	19.2955	20.0785	20.0826	19.57	19.9104
G4LXC1	tr|G4LXC1|G4LXC1_SCHMA Pinn, putative OS=Schistosoma mansoni GN=Smp_198750 PE=4 SV=1	6	44.507	0.763461	21.0187	20.0298	20.534	20.5275	20.2167	18.9883	20.0872	19.7641
G4LXC4	tr|G4LXC4|G4LXC4_SCHMA Cold shock domain protein A, putative OS=Schistosoma mansoni GN=Smp_097750 PE=4 SV=1	6	19.686	0.593896	22.615	22.6214	22.3426	22.5263	22.1051	21.8183	21.8739	21.9324
G4LXC5	tr|G4LXC5|G4LXC5_SCHMA Nuclease-related OS=Schistosoma mansoni GN=Smp_175840 PE=4 SV=1	8	42.86	-0.0615479	19.9109	19.7906	20.9267	20.2094	19.9541	20.592	20.2669	20.271
G4LXC6	tr|G4LXC6|G4LXC6_SCHMA Nuclease-related OS=Schistosoma mansoni GN=Smp_175850 PE=4 SV=1	6	28.579	0.879578	18.7466	19.1381	19.2572	19.0473	18.7746	18.1847	17.5439	18.1677
G4LXD0;Q27277;G4LXD2	tr|G4LXD0|G4LXD0_SCHMA Y box binding protein, putative OS=Schistosoma mansoni GN=Smp_097800.2 PE=4 SV=1;tr|Q27277|Q27277_SCHMA Y box binding protein, putative OS=Schistosoma mansoni GN=Smp_097800.1 PE=2 SV=1;tr|G4LXD2|G4LXD2_SCHMA Y box binding protein, pu	5	18.522	1.5698	25.3288	24.8657	24.7843	24.9929	23.5785	23.1438	23.5471	23.4231
G4LXD4	tr|G4LXD4|G4LXD4_SCHMA Ubiquitin thioesterase OS=Schistosoma mansoni GN=Smp_097810.1 PE=3 SV=1	4	31.024	0.347887	19.0226	18.7291	18.8097	18.8538	18.6933	18.7681	18.0563	18.5059
G4LXE3;G4VBL7	tr|G4LXE3|G4LXE3_SCHMA Uncharacterized protein OS=Schistosoma mansoni GN=Smp_163540 PE=4 SV=1;tr|G4VBL7|G4VBL7_SCHMA Uncharacterized protein OS=Schistosoma mansoni GN=Smp_096920 PE=4 SV=1	4	59.628	-0.826275	15.9212	16.0628	15.8926	15.9589	16.916	15.9153	17.524	16.7851
G4LXE6	tr|G4LXE6|G4LXE6_SCHMA Symplekin, putative OS=Schistosoma mansoni GN=Smp_163560 PE=4 SV=1	12	220.4	0.996468	15.1419	15.6591	15.9756	15.5922	13.4626	14.1925	16.1321	14.5957
G4LXF1	tr|G4LXF1|G4LXF1_SCHMA Rab6, putative OS=Schistosoma mansoni GN=Smp_163580 PE=4 SV=1	9	23.256	-0.960764	21.7505	21.5789	22.0097	21.7797	22.6549	22.9407	22.6257	22.7404
G4LXG0	tr|G4LXG0|G4LXG0_SCHMA Uncharacterized protein OS=Schistosoma mansoni GN=Smp_076990 PE=4 SV=1	1	59.925	0.332935	16.1809			16.1809	16.1493	15.7528	15.6417	15.8479
G4LXG3	tr|G4LXG3|G4LXG3_SCHMA rRNA adenine N(6)-methyltransferase OS=Schistosoma mansoni GN=Smp_077020 PE=3 SV=1	2	35.1	1.72584	15.6226	15.0423	14.7764	15.1471			13.4213	13.4213
G4LXG6	tr|G4LXG6|G4LXG6_SCHMA Uncharacterized protein OS=Schistosoma mansoni GN=Smp_103010 PE=4 SV=1	3	20.892	0.739461	19.6669	19.5664	19.8993	19.7109	18.9242	18.9156	19.0744	18.9714
G4LXG8	tr|G4LXG8|G4LXG8_SCHMA Uncharacterized protein OS=Schistosoma mansoni GN=Smp_004550.1 PE=4 SV=1	5	17.376	-0.0428012	20.1302	20.5475	20.3278	20.3352	20.3595	20.5045	20.27	20.378
G4LXH6	tr|G4LXH6|G4LXH6_SCHMA Red protein (Ik factor) (Cytokine ik), putative OS=Schistosoma mansoni GN=Smp_004480 PE=4 SV=1	8	66.921	1.5949	19.2723	18.6162	18.8879	18.9255	17.8109	17.708	16.473	17.3306
G4LXH7;Q9GNF6	tr|G4LXH7|G4LXH7_SCHMA Peroxiredoxin, Prx3 OS=Schistosoma mansoni GN=Smp_004470.1 PE=4 SV=1;tr|Q9GNF6|Q9GNF6_SCHMA Thioredoxin peroxidase 3 OS=Schistosoma mansoni GN=TPx3 PE=2 SV=1	9	24.881	0.193912	22.8672	22.9383	22.9422	22.9159	22.7208	22.8208	22.6244	22.722
G4LXI6	tr|G4LXI6|G4LXI6_SCHMA Uncharacterized protein OS=Schistosoma mansoni GN=Smp_004360.1 PE=4 SV=1	4	25.586	0.223542	21.0217	20.2782	19.422	20.2406	19.9579	20.0463	20.047	20.0171
G4LXI7	tr|G4LXI7|G4LXI7_SCHMA Ubiquitin-conjugating enzyme E2 l, putative OS=Schistosoma mansoni GN=Smp_004350 PE=3 SV=1	6	18.205	0.282357	20.8886	20.4532	20.0965	20.4795	20.0364	20.2935	20.2614	20.1971
G4LXI8	tr|G4LXI8|G4LXI8_SCHMA ATP-binding cassette, sub-family E (Oabp),member, putative OS=Schistosoma mansoni GN=Smp_124460 PE=4 SV=1	18	61.936	0.955039	21.1983	21.1232	21.3824	21.2346	20.254	19.851	20.7339	20.2796
G4LXJ2	tr|G4LXJ2|G4LXJ2_SCHMA DNAj homolog subfamily C member, putative OS=Schistosoma mansoni GN=Smp_083450 PE=4 SV=1	9	32.217	0.677308	21.0374	20.431	20.3293	20.5993	20.0821	20.1788	19.505	19.9219
G4LXK2;G4LXK3	tr|G4LXK2|G4LXK2_SCHMA Calpain-7 (C02 family) OS=Schistosoma mansoni GN=Smp_083530.2 PE=3 SV=1;tr|G4LXK3|G4LXK3_SCHMA Calpain-7 (C02 family) OS=Schistosoma mansoni GN=Smp_083530.1 PE=3 SV=1	4	177.77	-2.76064	13.0988	15.5784	13.0719	13.9164	16.7136	16.6107	16.7067	16.677
G4LXL2	tr|G4LXL2|G4LXL2_SCHMA Sorting nexin, putative OS=Schistosoma mansoni GN=Smp_167550 PE=4 SV=1	6	65.709	1.21422	19.13	18.9895	18.8608	18.9935	18.3473	17.0608	17.9296	17.7792
G4LXM5	tr|G4LXM5|G4LXM5_SCHMA Ubiquitinyl hydrolase 1 OS=Schistosoma mansoni GN=Smp_069960 PE=3 SV=1	19	102.56	1.11955	19.9153	19.893	19.8536	19.8873	18.7689	18.825	18.7094	18.7678
G4LXM6	tr|G4LXM6|G4LXM6_SCHMA TATA-binding protein-associated phosphoprotein,putative OS=Schistosoma mansoni GN=Smp_198790 PE=4 SV=1	4	22.352	0.0789994	19.6808	19.5229	19.0998	19.4345	19.3584	19.6629	19.0451	19.3555
G4LXQ5	tr|G4LXQ5|G4LXQ5_SCHMA Uncharacterized protein OS=Schistosoma mansoni GN=Smp_045400 PE=4 SV=1	8	62.741	-0.123925	19.0924	18.9415	18.7714	18.9351	18.8249	19.1441	19.2082	19.059
G4LXR1	tr|G4LXR1|G4LXR1_SCHMA Vacuolar membrane protein related OS=Schistosoma mansoni GN=Smp_142210 PE=4 SV=1	2	128.36	5.40557	19.0245	18.5891	18.7042	18.7726			13.3671	13.3671
G4LXR6;G4LXR7	tr|G4LXR6|G4LXR6_SCHMA Proliferation-associated protein 2G4, 38kDa (M24 family) OS=Schistosoma mansoni GN=Smp_150690.1 PE=4 SV=1;tr|G4LXR7|G4LXR7_SCHMA Proliferation-associated protein 2G4, 38kDa (M24 family) OS=Schistosoma mansoni GN=Smp_150690.2 PE=4 SV=	20	43.034	-0.0816426	24.2407	24.3677	24.3923	24.3336	24.8021	24.723	23.7206	24.4152
G4LXR9	tr|G4LXR9|G4LXR9_SCHMA NADH-cytochrome b5 reductase OS=Schistosoma mansoni GN=Smp_053230 PE=3 SV=1	18	33.936	-1.73706	22.4696	22.7744	23.0953	22.7798	24.6248	24.2511	24.6745	24.5168
G4LXS1;G4LXS0	tr|G4LXS1|G4LXS1_SCHMA Aldo-keto reductase, putative OS=Schistosoma mansoni GN=Smp_053220.2 PE=4 SV=1;tr|G4LXS0|G4LXS0_SCHMA Aldo-keto reductase, putative OS=Schistosoma mansoni GN=Smp_053220.1 PE=4 SV=1	17	32.492	0.0674793	24.5256	24.4433	24.4319	24.467	24.5015	24.5549	24.142	24.3995
G4LXS3	tr|G4LXS3|G4LXS3_SCHMA Uncharacterized protein OS=Schistosoma mansoni GN=Smp_053190 PE=4 SV=1	2	65.524	-1.98432	14.5507	13.8075	15.0456	14.468	15.4963	14.661	19.1995	16.4523
G4LXT2	tr|G4LXT2|G4LXT2_SCHMA 40S ribosomal protein S6 OS=Schistosoma mansoni GN=Smp_053130 PE=3 SV=1	6	28.748	0.409784	19.5563	18.8978	18.5595	19.0046	17.5537	15.8784	22.3523	18.5948
G4LXT4	tr|G4LXT4|G4LXT4_SCHMA Uncharacterized protein OS=Schistosoma mansoni GN=Smp_150610 PE=4 SV=1	3	22.054	1.18888	18.8473	18.3764	19.0214	18.7484	18.311	17.5917	16.7759	17.5595
G4LXT7	tr|G4LXT7|G4LXT7_SCHMA ADP-ribosylation factor, arf, putative OS=Schistosoma mansoni GN=Smp_086900 PE=3 SV=1	6	20.165	-0.555837	17.5144	18.4015	18.6612	18.1924	18.6772	19.1617	18.4057	18.7482
G4LXU1	tr|G4LXU1|G4LXU1_SCHMA Uncharacterized protein OS=Schistosoma mansoni GN=Smp_169410 PE=4 SV=1	4	95.688	-0.135033	14.1728	15.0177	15.0307	14.7404	15.1464	15.1504	14.3295	14.8754
G4LXU9	tr|G4LXU9|G4LXU9_SCHMA DNA polymerase OS=Schistosoma mansoni GN=Smp_087010 PE=3 SV=1	10	133.02	-1.34677	11.3347	14.4203	15.6301	13.795	15.1683	13.8567	16.4005	15.1418
G4LXV1	tr|G4LXV1|G4LXV1_SCHMA Rab-18, putative OS=Schistosoma mansoni GN=Smp_169470 PE=4 SV=1	4	22.704	0.950546	19.1289	19.0453	18.5302	18.9015	18.2061	17.9935	17.6531	17.9509
G4LXV4	tr|G4LXV4|G4LXV4_SCHMA WD-repeat protein, putative OS=Schistosoma mansoni GN=Smp_062970 PE=4 SV=1	2	153.91	1.25777	15.9986	15.8583	15.8412	15.8994	13.3962	15.0983	15.4303	14.6416
G4LXV5	tr|G4LXV5|G4LXV5_SCHMA Tetraspanin OS=Schistosoma mansoni GN=Smp_062980 PE=3 SV=1	1	25.972	0.0198678	20.0441	18.7639	18.512	19.1066	19.3692	18.9004	18.9907	19.0868
G4LXV8	tr|G4LXV8|G4LXV8_SCHMA Actin-like protein 6, acl6 OS=Schistosoma mansoni GN=Smp_063040 PE=3 SV=1	13	45.541	0.615212	20.905	20.7791	20.6627	20.7823	19.971	20.3263	20.2038	20.167
G4LXW3	tr|G4LXW3|G4LXW3_SCHMA High-density lipoprotein receptor (Hdl) OS=Schistosoma mansoni GN=Smp_170110 PE=4 SV=1	16	83.708	2.52756	19.1695	19.0925	19.0849	19.1156	16.4664		16.7097	16.5881
G4LXX5;G4LXX6	tr|G4LXX5|G4LXX5_SCHMA Cysteine synthase, putative OS=Schistosoma mansoni GN=Smp_125070.1 PE=4 SV=1;tr|G4LXX6|G4LXX6_SCHMA Cysteine synthase, putative OS=Schistosoma mansoni GN=Smp_125070.2 PE=4 SV=1	8	56.108	1.91618	18.8032	19.5623	18.6023	18.9893	17.1055	16.3158	17.7979	17.0731
G4LXY8	tr|G4LXY8|G4LXY8_SCHMA Adenylyl cyclase-associated protein, putative OS=Schistosoma mansoni GN=Smp_161550 PE=4 SV=1	3	44.307	-0.869391			15.7681	15.7681	16.9049	16.379	16.6287	16.6375
G4LXZ2	tr|G4LXZ2|G4LXZ2_SCHMA Ribosomal protein l7ae, putative OS=Schistosoma mansoni GN=Smp_104660 PE=4 SV=1	3	13.67	1.99856	23.0361	22.8841	22.6485	22.8563	20.9018	21.1712	20.5001	20.8577
G4LXZ3	tr|G4LXZ3|G4LXZ3_SCHMA Rab15, 13, 10, 1, 35, 5, and, putative OS=Schistosoma mansoni GN=Smp_104670 PE=4 SV=1	4	23.904	-1.64507	19.0173	19.4844	19.7956	19.4324	20.9659	20.998	21.2686	21.0775
G4LXZ4;G4LXZ5	tr|G4LXZ4|G4LXZ4_SCHMA Uncharacterized protein OS=Schistosoma mansoni GN=Smp_104680.2 PE=3 SV=1;tr|G4LXZ5|G4LXZ5_SCHMA Uncharacterized protein OS=Schistosoma mansoni GN=Smp_104680.1 PE=3 SV=1	1	20.199	-0.307131	17.5917	17.737	17.8443	17.7243	17.9784	18.3112	17.8048	18.0315
G4LXZ9;G4LY00	tr|G4LXZ9|G4LXZ9_SCHMA UDP-N-acetylglucosamine--dolichyl-phosphate N-acetylglucosaminephosphotransferase OS=Schistosoma mansoni GN=Smp_051360.2 PE=4 SV=1;tr|G4LY00|G4LY00_SCHMA UDP-N-acetylglucosamine--dolichyl-phosphate N-acetylglucosaminephosphotransfera	1	52.392	-1.15662		15.8138	17.3437	16.5787	18.1978	17.6204	17.388	17.7354
G4LY02	tr|G4LY02|G4LY02_SCHMA NIF3-like protein 1 OS=Schistosoma mansoni GN=Smp_051390 PE=3 SV=1	11	39.11	-0.341958	20.378	20.5979	20.5646	20.5135	20.8409	20.7862	20.9393	20.8555
G4LY12	tr|G4LY12|G4LY12_SCHMA Uncharacterized protein OS=Schistosoma mansoni GN=Smp_212450 PE=4 SV=1	3	32.783	0.342076	17.0891	17.7664	17.4089	17.4215	16.579		17.5798	17.0794
G4LY19	tr|G4LY19|G4LY19_SCHMA Splicing factor Prp8, putative (Fragment) OS=Schistosoma mansoni GN=Smp_140890 PE=4 SV=1	35	245.72	-1.13678	14.57	14.0506	16.9485	15.1897	15.4077	14.836	18.7356	16.3265
G4LY20	tr|G4LY20|G4LY20_SCHMA C-terminal pdz ligand of neuronal nitric oxide synthase protein, putative OS=Schistosoma mansoni GN=Smp_163650 PE=4 SV=1	1	103.55	0.693781	16.5888	16.6437	17.7664	16.9996	16.779	16.6911	15.4475	16.3059
G4LY21	tr|G4LY21|G4LY21_SCHMA DNA-(apurinic or apyrimidinic site) lyase OS=Schistosoma mansoni GN=Smp_051320 PE=3 SV=1	13	32.153	-0.352104	21.5252	21.6236	21.4818	21.5436	21.8715	22.182	21.6335	21.8957
G4LY23	tr|G4LY23|G4LY23_SCHMA Tar DNA-binding protein, putative OS=Schistosoma mansoni GN=Smp_051300 PE=4 SV=1	6	38.939	0.793139	20.3836	20.3505	20.1509	20.295	19.855	19.9928	18.6578	19.5019
G4LY24	tr|G4LY24|G4LY24_SCHMA Uncharacterized protein OS=Schistosoma mansoni GN=Smp_051290 PE=4 SV=1	4	66.833	M only				N/A	16.0269	16.7288	17.4658	16.7405
G4LY27	tr|G4LY27|G4LY27_SCHMA Smg-7 (Suppressor with morphological effect on genitalia protein 7), putative OS=Schistosoma mansoni GN=Smp_051280 PE=4 SV=1	3	129.91	0.542058	16.9091	16.6136	16.4148	16.6459	16.1616	15.8032	16.3466	16.1038
G4LY28	tr|G4LY28|G4LY28_SCHMA TATA-binding protein-associated phosphoprotein (Dr1), putative OS=Schistosoma mansoni GN=Smp_149540 PE=4 SV=1	2	27.077	0.827213	19.1309	18.7239		18.9274	17.7227	18.6773	17.9006	18.1002
G4LY29	tr|G4LY29|G4LY29_SCHMA 60S ribosomal protein L8, putative OS=Schistosoma mansoni GN=Smp_051260 PE=3 SV=1	7	28.207	-0.128731	20.3117	20.7752	20.6732	20.5867	19.6005	18.8109	23.735	20.7154
G4LY33;G4LY31;G4LY34;G4LY32	tr|G4LY33|G4LY33_SCHMA Tar DNA-binding protein, putative OS=Schistosoma mansoni GN=Smp_051230.2 PE=4 SV=1;tr|G4LY31|G4LY31_SCHMA Tar DNA-binding protein, putative OS=Schistosoma mansoni GN=Smp_051230.3 PE=4 SV=1;tr|G4LY34|G4LY34_SCHMA Tar DNA-binding prote	7	45.708	0.913834	22.5682	22.3551	22.3325	22.4186	21.4942	21.6694	21.3506	21.5047
G4LY35	tr|G4LY35|G4LY35_SCHMA Uncharacterized protein OS=Schistosoma mansoni GN=Smp_051220 PE=4 SV=1	1	27.145	-1.20052		14.9984	16.3025	15.6504	16.7983	17.5606	16.1939	16.8509
G4LY37;G4LY38	tr|G4LY37|G4LY37_SCHMA Importin subunit alpha OS=Schistosoma mansoni GN=Smp_051210.1 PE=3 SV=1;tr|G4LY38|G4LY38_SCHMA Importin subunit alpha OS=Schistosoma mansoni GN=Smp_051210.3 PE=3 SV=1	11	58.778	-0.14363	22.5713	22.5025	22.4122	22.4953	22.5693	22.5387	22.8089	22.639
G4LY44	tr|G4LY44|G4LY44_SCHMA Replication factor C / DNA polymerase III gamma-tau subunit, putative OS=Schistosoma mansoni GN=Smp_096360 PE=4 SV=1	12	40.204	0.606633	20.9476	20.3533	20.649	20.65	19.9439	20.4828	19.7034	20.0433
G4LY49	tr|G4LY49|G4LY49_SCHMA Alpha-l-fucosidase, putative OS=Schistosoma mansoni GN=Smp_146250 PE=4 SV=1	5	59.179	-1.66724	14.6007	16.1076	16.3541	15.6875	17.5259	17.5696	16.9687	17.3547
G4LY51	tr|G4LY51|G4LY51_SCHMA Uncharacterized protein OS=Schistosoma mansoni GN=Smp_044680 PE=4 SV=1	21	58.115	-1.72379	19.699	19.4235	19.9751	19.6992	21.1664	19.3243	23.7783	21.423
G4LY57;G4LY56	tr|G4LY57|G4LY57_SCHMA Pumilio, putative OS=Schistosoma mansoni GN=Smp_155000.2 PE=4 SV=1;tr|G4LY56|G4LY56_SCHMA Pumilio, putative OS=Schistosoma mansoni GN=Smp_155000.1 PE=4 SV=1	2	140.07	0.224364	15.4067	15.0879	15.8477	15.4474	14.4133	16.0268	15.229	15.223
G4LY59	tr|G4LY59|G4LY59_SCHMA Heat shock protein 70 (Hsp70)-interacting protein, putative OS=Schistosoma mansoni GN=Smp_155020 PE=4 SV=1	12	117.83	0.594555	17.8682	17.9301	17.2668	17.6884	17.3382	15.8925	18.0507	17.0938
G4LY60	tr|G4LY60|G4LY60_SCHMA 60S ribosomal protein L35a, putative OS=Schistosoma mansoni GN=Smp_061200 PE=4 SV=1	4	14.979	-0.370408	18.9337	19.0498	19.0327	19.0054	17.0396		21.7119	19.3758
G4LY63	tr|G4LY63|G4LY63_SCHMA Succinate dehydrogenase [ubiquinone] flavoprotein subunit, mitochondrial OS=Schistosoma mansoni GN=Smp_061230 PE=3 SV=1	28	71.427	0.210335	22.9848	23.1203	23.4711	23.1921	23.2484	22.9389	22.7579	22.9817
G4LY73;G4LY72	tr|G4LY73|G4LY73_SCHMA Set, putative OS=Schistosoma mansoni GN=Smp_155060.1 PE=3 SV=1;tr|G4LY72|G4LY72_SCHMA Set, putative OS=Schistosoma mansoni GN=Smp_155060.2 PE=3 SV=1	9	26.653	0.584079	26.5168	25.9735	25.8125	26.1009	25.6851	25.7839	25.0815	25.5169
G4LY76;G4LY75;G4LY74	tr|G4LY76|G4LY76_SCHMA Synaptic glycoprotein sc2 related OS=Schistosoma mansoni GN=Smp_081820.4 PE=4 SV=1;tr|G4LY75|G4LY75_SCHMA Synaptic glycoprotein sc2 related OS=Schistosoma mansoni GN=Smp_081820.3 PE=4 SV=1;tr|G4LY74|G4LY74_SCHMA Synaptic glycoprotein	4	35.432	-0.92197	13.4324	14.1956	17.9376	15.1885	15.0842	16.8708	16.3765	16.1105
G4LY77	tr|G4LY77|G4LY77_SCHMA Hcnp homolog, putative OS=Schistosoma mansoni GN=Smp_166250 PE=4 SV=1	3	35.686	0.684455	17.2468	17.3648	18.4155	17.6757	17.2289	16.5887	17.1561	16.9912
G4LY79	tr|G4LY79|G4LY79_SCHMA Nucleoside diphosphate kinase OS=Schistosoma mansoni GN=Smp_081790 PE=3 SV=1	3	17.314	1.21536	18.5371	18.4157	16.723	17.8919	16.6766			16.6766
G4LY81	tr|G4LY81|G4LY81_SCHMA Ubiquitin-activating enzyme E1b, putative OS=Schistosoma mansoni GN=Smp_166220 PE=4 SV=1	23	85.392	0.81603	19.8515	20.1243	20.1903	20.0554	19.2426	18.5764	19.8989	19.2393
G4LY86	tr|G4LY86|G4LY86_SCHMA Ccr4-not transcription complex, putative OS=Schistosoma mansoni GN=Smp_133320 PE=4 SV=1	3	302.04	-0.263276			13.7366	13.7366	13.8683	14.1599	13.9713	13.9998
G4LY90	tr|G4LY90|G4LY90_SCHMA Uncharacterized protein OS=Schistosoma mansoni GN=Smp_020590 PE=4 SV=1	5	48.836	0.129667	16.2098	16.9341	17.0632	16.7357	16.7618	16.7957	16.2605	16.606
G4LYA2	tr|G4LYA2|G4LYA2_SCHMA Cysteine and histidine-rich domain (Chord)-containing, zinc binding protein, putative OS=Schistosoma mansoni GN=Smp_020800 PE=4 SV=1	18	38.562	-0.341783	22.0014	22.0467	22.3016	22.1166	22.3226	22.6342	22.4183	22.4584
G4LYA4	tr|G4LYA4|G4LYA4_SCHMA Dolichyl-diphosphooligosaccharide--protein glycosyltransferase subunit DAD1 OS=Schistosoma mansoni GN=Smp_020770 PE=3 SV=1	1	15.086	-0.593574	19.0082	19.8067	19.8674	19.5608	20.004	19.9657	20.4932	20.1543
G4LYA9	tr|G4LYA9|G4LYA9_SCHMA Jnk stimulatory phosphatase-related OS=Schistosoma mansoni GN=Smp_133450 PE=4 SV=1	3	59.261	0.00132244	18.2996	17.9147	17.7541	17.9895	17.7668	17.9685	18.2291	17.9881
G4LYB3	tr|G4LYB3|G4LYB3_SCHMA Sec31-related protein OS=Schistosoma mansoni GN=Smp_212490 PE=4 SV=1	8	197.68	-1.07615	16.1074	16.0827	15.1983	15.7961	16.6284	17.0463	16.9421	16.8723
G4LYB8;G4LYB6;G4LYB7	tr|G4LYB8|G4LYB8_SCHMA Heterogeneous nuclear ribonucleoprotein,putative OS=Schistosoma mansoni GN=Smp_056810.3 PE=4 SV=1;tr|G4LYB6|G4LYB6_SCHMA Heterogeneous nuclear ribonucleoprotein,putative OS=Schistosoma mansoni GN=Smp_056810.2 PE=4 SV=1;tr|G4LYB7|G4LY	6	41.934	0.754233	21.6557	21.1963	21.2526	21.3682	20.6248	20.7972	20.4199	20.614
G4LYB9	tr|G4LYB9|G4LYB9_SCHMA SWI/SNF complex-related OS=Schistosoma mansoni GN=Smp_152650 PE=4 SV=1	16	141.07	-0.385325	18.9759	18.8784	19.0935	18.9826	19.2853	19.434	19.3844	19.3679
G4LYC0	tr|G4LYC0|G4LYC0_SCHMA SWI/SNF-related matrix-associated actin-dependent regulator of chromatin subfamily C member 1(Smarcc1) OS=Schistosoma mansoni GN=Smp_152640 PE=4 SV=1	1	35.345	0.205417	15.795	16.4858	16.8856	16.3888	16.3586	16.0082		16.1834
G4LYC3;Q26593	tr|G4LYC3|G4LYC3_SCHMA Protein disulfide-isomerase OS=Schistosoma mansoni GN=Smp_056760 PE=3 SV=1;tr|Q26593|Q26593_SCHMA Protein disulfide-isomerase OS=Schistosoma mansoni PE=3 SV=1	35	54.16	-0.371779	25.159	24.8716	25.0441	25.0249	25.309	25.6837	25.1973	25.3967
G4LYD2	tr|G4LYD2|G4LYD2_SCHMA Membrane associated ring finger 1,8, putative OS=Schistosoma mansoni GN=Smp_056700 PE=4 SV=1	6	74.451	F only	17.297	17.5244	17.6746	17.4987				N/A
G4LYD3;G4LYD4	tr|G4LYD3|G4LYD3_SCHMA Pyridoxine kinase OS=Schistosoma mansoni GN=Smp_164250.2 PE=4 SV=1;tr|G4LYD4|G4LYD4_SCHMA Pyridoxine kinase OS=Schistosoma mansoni GN=Smp_164250.1 PE=4 SV=1	3	36.891	0.546673	16.9599	16.9607	16.9614	16.9606	16.8986	16.7221	15.6211	16.414
G4LYD9	tr|G4LYD9|G4LYD9_SCHMA Importin-alpha re-exporter (Chromosome segregation 1-like protein) OS=Schistosoma mansoni GN=Smp_128050 PE=4 SV=1	30	117.34	0.460294	21.9438	21.9414	21.8377	21.9076	21.3366	21.3919	21.6135	21.4473
G4LYE5	tr|G4LYE5|G4LYE5_SCHMA Uncharacterized protein OS=Schistosoma mansoni GN=Smp_152440 PE=4 SV=1	11	60.625	0.53759	19.8719	19.3497	19.1917	19.4711	18.8513	19.2087	18.7405	18.9335
G4LYE6	tr|G4LYE6|G4LYE6_SCHMA Proteasome subunit beta OS=Schistosoma mansoni GN=Smp_056500 PE=3 SV=1	7	27.78	-0.109285	21.7506	21.7484	21.6359	21.7116	21.7877	22.2069	21.4682	21.8209
G4LYF4	tr|G4LYF4|G4LYF4_SCHMA Uncharacterized protein OS=Schistosoma mansoni GN=Smp_198820 PE=4 SV=1	4	29.107	2.60949	19.011	18.8511	18.6703	18.8441		16.9254	15.5439	16.2347
G4LYF6	tr|G4LYF6|G4LYF6_SCHMA Phosphatidylcholine-sterol acyltransferase (Lecithin-cholesterol acyltransferase)/ Phospholipase A OS=Schistosoma mansoni GN=Smp_166500.1 PE=4 SV=1	3	46.242	-0.886139	16.4462	16.1894		16.3178	17.5095	17.1539	16.9485	17.204
G4LYF7	tr|G4LYF7|G4LYF7_SCHMA Troponin t, invertebrate, putative OS=Schistosoma mansoni GN=Smp_179810 PE=4 SV=1	10	37.437	0.113641	22.451	22.8256	22.1324	22.4697	22.3805	22.0423	22.6453	22.356
G4LYF8	tr|G4LYF8|G4LYF8_SCHMA ADP-ribosylation factor family OS=Schistosoma mansoni GN=Smp_000730 PE=3 SV=1	6	20.114	-0.918335	19.6671	19.2746	19.2339	19.3919	20.8827	20.7937	19.2542	20.3102
G4LYG3	tr|G4LYG3|G4LYG3_SCHMA Ornithine transporter 2 (Solute carrier family 25 member 2) OS=Schistosoma mansoni GN=Smp_000680 PE=3 SV=1	3	33.757	-1.35944	16.8166	15.3095	17.494	16.54	17.6641		18.1347	17.8994
G4LYH2	tr|G4LYH2|G4LYH2_SCHMA Notchless homolog 1 OS=Schistosoma mansoni GN=Smp_000600 PE=4 SV=1	8	61.99	2.09429	17.1603	17.6851	17.3624	17.4026		15.3083		15.3083
G4LYH3	tr|G4LYH3|G4LYH3_SCHMA Uncharacterized protein OS=Schistosoma mansoni GN=Smp_000590.1 PE=4 SV=1	2	25.114	1.34812	17.9643	17.9318	17.5297	17.8086	16.0533	17.5774	15.7508	16.4605
G4LYH5;G4LYH6	tr|G4LYH5|G4LYH5_SCHMA Zinc finger protein, putative OS=Schistosoma mansoni GN=Smp_122370.1 PE=4 SV=1;tr|G4LYH6|G4LYH6_SCHMA Zinc finger protein, putative OS=Schistosoma mansoni GN=Smp_122370.2 PE=4 SV=1	16	141.26	-0.537336	14.636	13.6293	14.897	14.3874	12.6505		17.199	14.9248
G4LYI3	tr|G4LYI3|G4LYI3_SCHMA Gdp-mannose pyrophosphorylase b, isoform 2 OS=Schistosoma mansoni GN=Smp_000510 PE=4 SV=1	7	45.99	-2.65555	16.2437	17.8515	18.4857	17.527	20.1185	20.1642	20.2649	20.1825
G4LYI7	tr|G4LYI7|G4LYI7_SCHMA Eukaryotic translation initiation factor 3 subunit C OS=Schistosoma mansoni GN=Smp_000480 PE=3 SV=1	29	100.22	0.888533	20.0628	20.5126	20.8227	20.466	19.4506	19.3673	19.9146	19.5775
G4LYI8	tr|G4LYI8|G4LYI8_SCHMA ATP-dependent (S)-NAD(P)H-hydrate dehydratase OS=Schistosoma mansoni GN=Smp_000470 PE=3 SV=1	6	31.975	0.220516	18.8421	19.2631	19.2478	19.1177	18.8904	18.5147	19.2864	18.8971
G4LYJ0	tr|G4LYJ0|G4LYJ0_SCHMA Uncharacterized protein OS=Schistosoma mansoni GN=Smp_000460 PE=4 SV=1	17	89.086	1.50086	22.4316	22.2942	22.0941	22.2733	20.8732	20.8553	20.5889	20.7724
G4LYJ1	tr|G4LYJ1|G4LYJ1_SCHMA Uncharacterized protein (Fragment) OS=Schistosoma mansoni GN=Smp_000440 PE=4 SV=1	2	46.626	F only	18.1707	17.4506	17.5816	17.7343				N/A
G4LYK3	tr|G4LYK3|G4LYK3_SCHMA WD40-repeat containing protein OS=Schistosoma mansoni GN=Smp_151180 PE=4 SV=1	1	35.329	0.0792379	17.2548	17.5319	17.2403	17.3423	17.456	16.9631	17.3702	17.2631
G4LYK6	tr|G4LYK6|G4LYK6_SCHMA V-type proton ATPase subunit G OS=Schistosoma mansoni GN=Smp_054220 PE=3 SV=1	3	13.674	0.244808	18.3265	19.4657		18.8961	19.0285	19.078	17.8475	18.6513
G4LYK7	tr|G4LYK7|G4LYK7_SCHMA NADH-ubiquinone oxidoreductase sgdh subunit,putative OS=Schistosoma mansoni GN=Smp_054200 PE=4 SV=1	3	24.033	-0.0362809	19.617	19.2936	19.0318	19.3142	19.3492	19.161	19.5411	19.3504
G4LYL3	tr|G4LYL3|G4LYL3_SCHMA Glutamyl-tRNA(Gln) amidotransferase subunit A,putative OS=Schistosoma mansoni GN=Smp_031990 PE=4 SV=1	4	58.311	-0.245295	16.8487	17.7955	17.6091	17.4178	17.5587	18.1032	17.3273	17.6631
G4LYL8	tr|G4LYL8|G4LYL8_SCHMA Tuftelin interacting protein, putative OS=Schistosoma mansoni GN=Smp_139510 PE=4 SV=1	4	84.614	0.448402	14.807	14.8743	14.6436	14.7749	13.6765		14.9766	14.3265
G4LYM0	tr|G4LYM0|G4LYM0_SCHMA Uncharacterized protein OS=Schistosoma mansoni GN=Smp_032060 PE=4 SV=1	2	14.247	1.1796	20.2404	20.415	19.0556	19.9037		18.9824	18.4657	18.7241
G4LYN1	tr|G4LYN1|G4LYN1_SCHMA Neuroendocrine differentiation factor, putative OS=Schistosoma mansoni GN=Smp_032150 PE=3 SV=1	2	24.264	-0.0781112	18.4758	18.1765	17.8739	18.1754	18.0477	18.7034	18.0094	18.2535
G4LYN4	tr|G4LYN4|G4LYN4_SCHMA ADP-ribosylation factor, arf, putative OS=Schistosoma mansoni GN=Smp_032180 PE=4 SV=1	7	20.377	-0.165322	22.3642	22.3121	22.5124	22.3962	22.4083	22.6689	22.6074	22.5616
G4LYN6	tr|G4LYN6|G4LYN6_SCHMA Lipopolysaccharide kinase,putative OS=Schistosoma mansoni GN=Smp_139630 PE=4 SV=1	3	71.256	-0.0909938	18.0544	18.0254	17.6686	17.9161	17.9238	18.4987	17.5988	18.0071
G4LYN7	tr|G4LYN7|G4LYN7_SCHMA Uncharacterized protein OS=Schistosoma mansoni GN=Smp_032230 PE=4 SV=1	3	14.892	0.711344	19.608	19.8577	19.1702	19.5453	18.7602	19.1456	18.596	18.8339
G4LYN8	tr|G4LYN8|G4LYN8_SCHMA Uncharacterized protein OS=Schistosoma mansoni GN=Smp_032240 PE=4 SV=1	1	15.579	0.0331742	18.0581		16.8117	17.4349	17.1952	17.575	17.4349	17.4017
G4LYN9	tr|G4LYN9|G4LYN9_SCHMA Family S12 unassigned peptidase (S12 family) OS=Schistosoma mansoni GN=Smp_032250 PE=4 SV=1	4	38.409	-0.847313			15.7806	15.7806	15.4479	15.4296	19.0061	16.6279
G4LYP0;Q15ET9	tr|G4LYP0|G4LYP0_SCHMA Ribosomal protein L15 OS=Schistosoma mansoni GN=Smp_032260 PE=3 SV=1;tr|Q15ET9|Q15ET9_SCHMA Ribosomal protein L15 OS=Schistosoma mansoni PE=2 SV=1	6	24.092	1.32644	21.2478	21.4143	21.505	21.389	19.92	16.7073	23.5606	20.0626
G4LYP2;G4LYP1	tr|G4LYP2|G4LYP2_SCHMA Mitochondrial processing peptidase beta-subunit (M16 family) OS=Schistosoma mansoni GN=Smp_009650.1 PE=3 SV=1;tr|G4LYP1|G4LYP1_SCHMA Mitochondrial processing peptidase beta-subunit (M16 family) OS=Schistosoma mansoni GN=Smp_009650.2	18	53.781	-0.0473368	22.8179	23.2389	23.2951	23.1173	23.1921	23.1485	23.1533	23.1646
G4LYP9	tr|G4LYP9|G4LYP9_SCHMA Alanine aminotransferase, putative OS=Schistosoma mansoni GN=Smp_130540 PE=4 SV=1	16	53.992	0.0447975	20.5278	20.8609	20.7957	20.7281	20.8898	20.4368	20.7234	20.6833
G4LYQ2	tr|G4LYQ2|G4LYQ2_SCHMA Prominin (Prom) protein, putative OS=Schistosoma mansoni GN=Smp_130520.1 PE=4 SV=1	10	80.566	-1.18476	16.4024	16.7305	18.4315	17.1882	18.8394	18.0435	18.2359	18.3729
G4LYR6	tr|G4LYR6|G4LYR6_SCHMA Dynein light intermediate chain, putative OS=Schistosoma mansoni GN=Smp_130410 PE=4 SV=1	12	63.475	-0.700849	18.9651	19.3884	19.1311	19.1615	19.9523	20.1354	19.4995	19.8624
G4LYR8	tr|G4LYR8|G4LYR8_SCHMA Vacuolar-sorting protein SNF8 OS=Schistosoma mansoni GN=Smp_198850 PE=3 SV=1	2	27.617	0.368226	17.456	18.269		17.8625	18.1175	17.741	16.6242	17.4942
G4LYS3	tr|G4LYS3|G4LYS3_SCHMA 39S ribosomal protein L19, mitochondrial, putative OS=Schistosoma mansoni GN=Smp_138670 PE=4 SV=1	10	34.662	1.0234	20.1823	20.1355	20.2718	20.1965	19.3986	19.0502	19.0706	19.1731
G4LYS8	tr|G4LYS8|G4LYS8_SCHMA Huntingtin interacting protein-related OS=Schistosoma mansoni GN=Smp_210640 PE=4 SV=1	8	55.421	1.70393	17.289	16.8158	17.3108	17.1386		15.1525	15.7168	15.4346
G4LYS9;C4QPQ2;C4QPQ1	tr|G4LYS9|G4LYS9_SCHMA Mannosyltransferase OS=Schistosoma mansoni GN=Smp_103930.1 PE=3 SV=1;tr|C4QPQ2|C4QPQ2_SCHMA Mannosyltransferase (Fragment) OS=Schistosoma mansoni GN=Smp_103930.6 PE=3 SV=1;tr|C4QPQ1|C4QPQ1_SCHMA Mannosyltransferase (Fragment) OS=Schi	4	68.726	-1.72672	14.1172		16.9812	15.5492	17.1301	17.5156	17.182	17.2759
G4LYT1	tr|G4LYT1|G4LYT1_SCHMA Uncharacterized protein OS=Schistosoma mansoni GN=Smp_154000.1 PE=4 SV=1	1	25.186	M only				N/A	19.6869	20.2436	19.3243	19.7516
G4LYT5	tr|G4LYT5|G4LYT5_SCHMA NADH dehydrogenase [ubiquinone] 1 alpha subcomplex subunit 12 OS=Schistosoma mansoni GN=Smp_082940 PE=3 SV=1	5	16.364	-0.0494299	21.0043	20.9611	20.8319	20.9324	21.2176	20.8815	20.8464	20.9819
G4LYU6;Q26606	tr|G4LYU6|G4LYU6_SCHMA Serpin, putative OS=Schistosoma mansoni GN=Smp_090080 PE=3 SV=1;tr|Q26606|Q26606_SCHMA Serpin (Fragment) OS=Schistosoma mansoni GN=SPI PE=2 SV=1	11	46.005	-2.13115	20.1516	20.9152	20.3492	20.472	22.953	22.4235	22.433	22.6032
G4LYU9	tr|G4LYU9|G4LYU9_SCHMA Uncharacterized protein OS=Schistosoma mansoni GN=Smp_171300 PE=4 SV=1	3	126.9	-2.81525	13.3512	13.2393	14.6207	13.737	16.0303	15.7619	17.8648	16.5523
G4LYV3	tr|G4LYV3|G4LYV3_SCHMA Nuclear movement protein nudc, putative OS=Schistosoma mansoni GN=Smp_103320 PE=4 SV=1	22	37.485	0.281167	24.3546	23.8468	23.6976	23.9664	23.7529	23.8861	23.4166	23.6852
G4LYV4	tr|G4LYV4|G4LYV4_SCHMA Signal recognition particle 9 kD protein,putative OS=Schistosoma mansoni GN=Smp_103310 PE=4 SV=1	1	14.173	0.990985	18.7998	18.79	18.3008	18.6302	17.5707		17.7077	17.6392
G4LYV5	tr|G4LYV5|G4LYV5_SCHMA ADP-ribosylation factor-like 2, arl2 (Fragment) OS=Schistosoma mansoni GN=Smp_164660 PE=3 SV=1	1	18.255	-0.349627	16.2004	16.6422	17.0014	16.6147	16.3108	17.9079	16.6741	16.9643
G4LYW5	tr|G4LYW5|G4LYW5_SCHMA Ng,ng-dimethylarginine dimethylaminohydrolase,putative OS=Schistosoma mansoni GN=Smp_052560 PE=4 SV=1	1	3.3339	-0.597254	20.6269	21.1199	21.1148	20.9539	21.2447	20.5395	22.8692	21.5511
G4LYW6	tr|G4LYW6|G4LYW6_SCHMA Ng,ng-dimethylarginine dimethylaminohydrolase,putative (Fragment) OS=Schistosoma mansoni GN=Smp_195000 PE=4 SV=1	6	19.384	-0.272501	21.0414	20.1794	20.0464	20.4224	21.1323	19.7617	21.1907	20.6949
G4LYW7	tr|G4LYW7|G4LYW7_SCHMA Uncharacterized protein OS=Schistosoma mansoni GN=Smp_150320 PE=4 SV=1	16	106.32	1.00828	19.16	19.5211	19.5646	19.4152	19.0042	16.9693	19.2473	18.407
G4LYX0	tr|G4LYX0|G4LYX0_SCHMA Synaptotagmin, putative OS=Schistosoma mansoni GN=Smp_150350 PE=4 SV=1	6	67.831	7.03779	20.2141	19.9296	20.441	20.1949	13.2565		13.0578	13.1571
G4LYX6	tr|G4LYX6|G4LYX6_SCHMA Protein kinase C alpha binding protein,putative OS=Schistosoma mansoni GN=Smp_132940 PE=4 SV=1	7	52.888	-1.91547		16.1215	16.1495	16.1355	17.8474	18.2133	18.0921	18.051
G4LYX7;G4LYX8	tr|G4LYX7|G4LYX7_SCHMA ATP synthase subunit d, mitochondrial OS=Schistosoma mansoni GN=Smp_019750.2 PE=3 SV=1;tr|G4LYX8|G4LYX8_SCHMA Uncharacterized protein OS=Schistosoma mansoni GN=Smp_019750.1 PE=4 SV=1	8	19.958	0.346912	22.6462	22.4879	22.5574	22.5639	22.3013	22.3336	22.0159	22.2169
G4LYZ1	tr|G4LYZ1|G4LYZ1_SCHMA Glutamate dehydrogenase OS=Schistosoma mansoni GN=Smp_093820 PE=3 SV=1	18	52.403	-1.1497	21.0776	21.3995	21.5368	21.338	22.6258	22.1768	22.6604	22.4877
G4LYZ5;G4LYZ4	tr|G4LYZ5|G4LYZ5_SCHMA DNA ligase OS=Schistosoma mansoni GN=Smp_019840.2 PE=3 SV=1;tr|G4LYZ4|G4LYZ4_SCHMA DNA ligase OS=Schistosoma mansoni GN=Smp_019840.1 PE=3 SV=1	11	87.765	-0.214553		14.9977	16.6101	15.8039	16.2507	14.2843	17.5204	16.0185
G4LZ03	tr|G4LZ03|G4LZ03_SCHMA Dihydrolipoamide acetyltransferase component of pyruvate dehydrogenase complex OS=Schistosoma mansoni GN=Smp_066410 PE=3 SV=1	16	52.62	-0.871158	20.3048	20.4726	20.6713	20.4829	21.3003	21.4824	21.2796	21.3541
G4LZ21	tr|G4LZ21|G4LZ21_SCHMA RNA and export factor binding protein, putative OS=Schistosoma mansoni GN=Smp_005260.1 PE=4 SV=1	9	23.389	0.781955	22.4746	22.074	22.7492	22.4326	21.3407	20.6094	23.0018	21.6506
G4LZ24	tr|G4LZ24|G4LZ24_SCHMA Cytochrome C1, putative OS=Schistosoma mansoni GN=Smp_005290 PE=4 SV=1	13	33.544	0.0383495	22.4694	22.2416	22.1749	22.2953	22.0363	22.4927	22.2419	22.257
G4LZ30;P15845	tr|G4LZ30|G4LZ30_SCHMA Calcium-binding protein, putative OS=Schistosoma mansoni GN=Smp_005350 PE=4 SV=1;sp|P15845|SM20_SCHMA 20 kDa calcium-binding protein OS=Schistosoma mansoni GN=SM20 PE=2 SV=2	5	57.938	-0.131174	18.8226	19.5119	18.9028	19.0791	18.9715	19.3147	19.3446	19.2103
G4LZ40	tr|G4LZ40|G4LZ40_SCHMA Rrp4, putative OS=Schistosoma mansoni GN=Smp_097250 PE=4 SV=1	3	14.649	1.02435	19.6029	20.0316	19.0839	19.5728	18.5524		18.5445	18.5484
G4LZ43	tr|G4LZ43|G4LZ43_SCHMA Uncharacterized protein OS=Schistosoma mansoni GN=Smp_129960 PE=4 SV=1	20	60.982	-1.47856	18.5293	18.2553	19.1084	18.631	19.4439	18.2422	22.6425	20.1095
G4LZ44	tr|G4LZ44|G4LZ44_SCHMA Rna-binding protein 12 (Sh3/ww domain anchor protein in the nucleus) (Swan), putative OS=Schistosoma mansoni GN=Smp_129950.1 PE=4 SV=1	29	103.6	0.187141	21.2255	20.8293	20.9604	21.0051	20.7888	21.0451	20.6199	20.8179
G4LZ47;G4LZ46	tr|G4LZ47|G4LZ47_SCHMA Uncharacterized protein OS=Schistosoma mansoni GN=Smp_164450.2 PE=4 SV=1;tr|G4LZ46|G4LZ46_SCHMA Uncharacterized protein OS=Schistosoma mansoni GN=Smp_164450.1 PE=4 SV=1	7	81.236	-1.02726	18.0624	18.3371	18.7771	18.3922	20.4029	19.3042	18.5513	19.4194
G4LZ54	tr|G4LZ54|G4LZ54_SCHMA Syntaxin-12, putative OS=Schistosoma mansoni GN=Smp_125640 PE=4 SV=1	7	26.822	-0.818297	20.0724	19.6423	18.1163	19.277	19.9907	20.4573	19.8379	20.0953
G4LZ56	tr|G4LZ56|G4LZ56_SCHMA Heterogeneous nuclear ribonucleoprotein l (Hnrnp l), putative OS=Schistosoma mansoni GN=Smp_006440 PE=4 SV=1	13	76.414	0.186723	20.3422	20.4559	20.5205	20.4395	20.3764	20.571	19.811	20.2528
G4LZ58	tr|G4LZ58|G4LZ58_SCHMA Developmentally regulated GTP-binding protein-related OS=Schistosoma mansoni GN=Smp_125670 PE=4 SV=1	4	39.05	1.41683	17.8519	16.4642	15.8709	16.729	15.6992		14.9252	15.3122
G4LZ61	tr|G4LZ61|G4LZ61_SCHMA Histidine triad (Hit) protein member, putative OS=Schistosoma mansoni GN=Smp_163300 PE=4 SV=1	5	40.619	1.17785	18.6179	18.1831	17.3947	18.0652	17.3551	16.9119	16.3952	16.8874
G4LZ67	tr|G4LZ67|G4LZ67_SCHMA Uncharacterized protein OS=Schistosoma mansoni GN=Smp_163260 PE=4 SV=1	3	42.151	0.988189	17.8294	17.5143	17.4603	17.6013	16.9893	15.9222	16.9279	16.6131
G4LZ69	tr|G4LZ69|G4LZ69_SCHMA Proteasome subunit alpha type OS=Schistosoma mansoni GN=Smp_076230 PE=3 SV=1	10	29.736	-0.360399	22.555	23.0557	23.2752	22.962	23.4393	23.5212	23.0065	23.3224
G4LZ70	tr|G4LZ70|G4LZ70_SCHMA Cysteine desulfurylase, putative OS=Schistosoma mansoni GN=Smp_075470 PE=3 SV=1	16	49.463	1.89758	22.2474	22.3884	22.692	22.4426	20.5968	20.7563	20.282	20.545
G4LZ71	tr|G4LZ71|G4LZ71_SCHMA Putative neutral sphingomyelinase OS=Schistosoma mansoni GN=Smp_162880 PE=4 SV=1	2	49.498	M only				N/A	14.6035	15.1544	14.3821	14.7133
G4LZ72	tr|G4LZ72|G4LZ72_SCHMA Programmed cell death protein, putative OS=Schistosoma mansoni GN=Smp_067490 PE=4 SV=1	3	22.995	0.163087	17.5383	17.0376	16.0573	16.8777	16.0866	17.2683	16.7891	16.7147
G4LZ73;G4LZ74;G4LZ75	tr|G4LZ73|G4LZ73_SCHMA Programmed cell death protein, putative OS=Schistosoma mansoni GN=Smp_067480.1 PE=4 SV=1;tr|G4LZ74|G4LZ74_SCHMA Programmed cell death protein, putative OS=Schistosoma mansoni GN=Smp_067480.3 PE=4 SV=1;tr|G4LZ75|G4LZ75_SCHMA Programme	4	15.854	-0.755166	19.5581	20.5249	20.3931	20.1587	20.8946	21.0402	20.8068	20.9139
G4LZ80	tr|G4LZ80|G4LZ80_SCHMA Splicing factor 3b, subunit 4,putative OS=Schistosoma mansoni GN=Smp_067420 PE=4 SV=1	1	36.852	0.304631	18.8064	17.6147	18.0034	18.1415	18.0993	18.1892	17.2222	17.8369
G4LZ82	tr|G4LZ82|G4LZ82_SCHMA Zinc binding dehydrogenase, putative OS=Schistosoma mansoni GN=Smp_067400 PE=4 SV=1	3	47.085	-0.255861	18.1	18.2298	18.2141	18.1813	18.1252		18.7492	18.4372
G4LZ88	tr|G4LZ88|G4LZ88_SCHMA Pol-related OS=Schistosoma mansoni GN=Smp_158640 PE=4 SV=1	4	19.092	2.3435	19.1153	18.4297	18.5885	18.7112	16.5024	15.2922	17.3084	16.3677
G4LZ93	tr|G4LZ93|G4LZ93_SCHMA Oligosaccharyl transferase, putative OS=Schistosoma mansoni GN=Smp_158600 PE=4 SV=1	10	87.94	-1.71391	16.4974	17.8077	18.922	17.7424	19.3871	19.0408	19.9411	19.4563
G4LZ98;G4LZ99	tr|G4LZ98|G4LZ98_SCHMA Nitrilase-related OS=Schistosoma mansoni GN=Smp_120080.1 PE=4 SV=1;tr|G4LZ99|G4LZ99_SCHMA Nitrilase-related OS=Schistosoma mansoni GN=Smp_120080.2 PE=4 SV=1	5	31.047	-0.317769	19.921	18.4041	19.6686	19.3313	19.6102	20.2576	19.0793	19.649
G4LZA1;G4LZA0	tr|G4LZA1|G4LZA1_SCHMA Uncharacterized protein OS=Schistosoma mansoni GN=Smp_086030.1 PE=4 SV=1;tr|G4LZA0|G4LZA0_SCHMA Uncharacterized protein OS=Schistosoma mansoni GN=Smp_086030.2 PE=4 SV=1	2	32.872	-1.76668		14.7057		14.7057	16.5151	17.0951	15.8069	16.4724
G4LZA3	tr|G4LZA3|G4LZA3_SCHMA WD-repeat protein, putative OS=Schistosoma mansoni GN=Smp_168920 PE=4 SV=1	6	43.178	1.52753	16.2788	17.8444	18.7952	17.6395	16.5865	15.8234	15.926	16.112
G4LZA6	tr|G4LZA6|G4LZA6_SCHMA Mitochondrial carrier protein-related OS=Schistosoma mansoni GN=Smp_194600 PE=3 SV=1	4	70.837	1.09042	15.1568	15.743	16.6215	15.8404	14.7907	14.0417	15.4176	14.75
G4LZB1	tr|G4LZB1|G4LZB1_SCHMA Translocon-associated protein, gamma subunit,putative OS=Schistosoma mansoni GN=Smp_074700 PE=4 SV=1	1	20.323	M only				N/A	20.282	19.8343	20.838	20.3181
G4LZB2	tr|G4LZB2|G4LZB2_SCHMA Cation efflux family protein OS=Schistosoma mansoni GN=Smp_162450 PE=4 SV=1	4	81.26	M only				N/A	16.97	15.7388	15.8655	16.1914
G4LZB4	tr|G4LZB4|G4LZB4_SCHMA mRNA-export factor tap/nxf-related OS=Schistosoma mansoni GN=Smp_162430 PE=4 SV=1	5	77.13	-0.0662963	17.0336	17.0245	16.9012	16.9864	17.1037	16.1114	17.9431	17.0527
G4LZC1	tr|G4LZC1|G4LZC1_SCHMA Isoamyl acetate-hydrolyzing esterase 1 OS=Schistosoma mansoni GN=Smp_162380 PE=4 SV=1	4	27.072	-1.47291	17.8055	18.1314	17.3443	17.7604			19.2333	19.2333
G4LZC4	tr|G4LZC4|G4LZC4_SCHMA Linker histone H1 OS=Schistosoma mansoni GN=Smp_162370 PE=3 SV=1	6	18.026	-1.48761	23.5579	22.5979	23.1234	23.0931	24.3293	23.278	26.1347	24.5807
G4LZD0	tr|G4LZD0|G4LZD0_SCHMA Citrate synthase OS=Schistosoma mansoni GN=Smp_204770 PE=3 SV=1	16	44.544	-1.02636	24.1959	24.2933	24.224	24.2377	25.3672	25.4345	24.9906	25.2641
G4LZD1	tr|G4LZD1|G4LZD1_SCHMA Uncharacterized protein Smp_204730 OS=Schistosoma mansoni GN=Smp_204730 PE=4 SV=1	3	79.115	-0.516364	15.0632	15.3154		15.1893	16.4907	16.734	13.8922	15.7056
G4LZD9	tr|G4LZD9|G4LZD9_SCHMA Uncharacterized protein OS=Schistosoma mansoni GN=Smp_094570 PE=4 SV=1	10	103.51	1.03245	16.3527	15.9737	18.0691	16.7985	15.7403	15.1729	16.385	15.7661
G4LZE0	tr|G4LZE0|G4LZE0_SCHMA Rab11, putative OS=Schistosoma mansoni GN=Smp_173990 PE=4 SV=1	9	104.86	-1.42036	18.5626	19.1432	19.229	18.9782	20.8874	20.5282	19.7802	20.3986
G4LZF6	tr|G4LZF6|G4LZF6_SCHMA Williams-beuren syndrome critical region protein, putative OS=Schistosoma mansoni GN=Smp_211190 PE=4 SV=1	4	22.994	F only	17.3106	18.4621	17.774	17.8489				N/A
G4LZG1	tr|G4LZG1|G4LZG1_SCHMA Short chain dehydrogenase,putative OS=Schistosoma mansoni GN=Smp_076580 PE=4 SV=1	11	38.391	-0.825297	20.415	20.7174	20.5689	20.5671	21.6773	21.4531	21.0467	21.3924
G4LZG8	tr|G4LZG8|G4LZG8_SCHMA Regulator of chromosome condensation, putative OS=Schistosoma mansoni GN=Smp_076530 PE=4 SV=1	11	81.315	0.308252	19.7521	19.5195	19.629	19.6335	19.2047	19.6532	19.1179	19.3253
G4LZI0	tr|G4LZI0|G4LZI0_SCHMA Uncharacterized protein OS=Schistosoma mansoni GN=Smp_163330 PE=4 SV=1	4	29.759	2.05725	15.3292	17.0072	17.2137	16.5167	15.7006	13.2183		14.4595
G4LZI4	tr|G4LZI4|G4LZI4_SCHMA Glycolipid transfer protein (Gltp), putative OS=Schistosoma mansoni GN=Smp_076390 PE=4 SV=1	2	25.86	F only	16.3097	16.7481	16.3594	16.4724				N/A
G4LZI6	tr|G4LZI6|G4LZI6_SCHMA Uncharacterized protein OS=Schistosoma mansoni GN=Smp_150930 PE=4 SV=1	6	67.993	1.08158	19.3994	19.0473	19.0851	19.1773	18.1449	17.2294	18.9127	18.0957
G4LZI9	tr|G4LZI9|G4LZI9_SCHMA Uncharacterized protein OS=Schistosoma mansoni GN=Smp_160560 PE=4 SV=1	16	79.512	0.534375	21.7562	21.6611	21.5967	21.6713	21.1203	21.3116	20.979	21.1369
G4LZJ2	tr|G4LZJ2|G4LZJ2_SCHMA Uncharacterized protein OS=Schistosoma mansoni GN=Smp_160540 PE=4 SV=1	1	16.325	-1.58129	16.2967	19.6712	19.5151	18.4943	19.9873	20.2786	19.9609	20.0756
G4LZJ5	tr|G4LZJ5|G4LZJ5_SCHMA Uncharacterized protein OS=Schistosoma mansoni GN=Smp_160530 PE=4 SV=1	3	56.341	0.221887	17.4961	15.8325	15.642	16.3235	16.3653	15.838		16.1017
G4LZJ7	tr|G4LZJ7|G4LZJ7_SCHMA Ankyrin repeat-containing, putative OS=Schistosoma mansoni GN=Smp_212250 PE=4 SV=1	4	36.558	-3.07095	15.7893	16.037		15.9132	18.9895	19.1122	18.8506	18.9841
G4LZK0	tr|G4LZK0|G4LZK0_SCHMA Transaldolase OS=Schistosoma mansoni GN=Smp_070600 PE=4 SV=1	20	37.763	-0.453761	22.6573	22.9214	23.1187	22.8991	23.4356	23.6805	22.9425	23.3529
G4LZK5	tr|G4LZK5|G4LZK5_SCHMA Tumor necrosis factor induced protein, putative OS=Schistosoma mansoni GN=Smp_124980 PE=4 SV=1	4	27.525	3.14029	19.1606	19.1098	18.7559	19.0088			15.8685	15.8685
G4LZK7;G4LZK6	tr|G4LZK7|G4LZK7_SCHMA Acetolactate synthase OS=Schistosoma mansoni GN=Smp_005390.2 PE=4 SV=1;tr|G4LZK6|G4LZK6_SCHMA Acetolactate synthase OS=Schistosoma mansoni GN=Smp_005390.1 PE=4 SV=1	3	60.382	0.717618	15.5607			15.5607	14.992	13.9601	15.5772	14.8431
G4LZL3	tr|G4LZL3|G4LZL3_SCHMA Epa2p-like protein OS=Schistosoma mansoni GN=Smp_125040 PE=4 SV=1	8	87.001	0.918397	17.5958	16.5448	17.2093	17.1167	15.9219	16.4847	16.1882	16.1983
G4LZL5	tr|G4LZL5|G4LZL5_SCHMA Poly(A) polymerase, putative OS=Schistosoma mansoni GN=Smp_178850 PE=4 SV=1	8	56.947	-1.9557		15.3785	18.2615	16.82	18.7338	18.6723	18.9209	18.7757
G4LZM1	tr|G4LZM1|G4LZM1_SCHMA DEAD box ATP-dependent RNA helicase, putative OS=Schistosoma mansoni GN=Smp_096530 PE=4 SV=1	6	30.239	-0.754773	20.4	20.2071	20.6206	20.4092	21.1706	21.3807	20.9407	21.164
G4LZN0;G4LZN1	tr|G4LZN0|G4LZN0_SCHMA Serpin, putative OS=Schistosoma mansoni GN=Smp_155560 PE=3 SV=1;tr|G4LZN1|G4LZN1_SCHMA Serpin, putative OS=Schistosoma mansoni GN=Smp_155550 PE=3 SV=1	6	43.592	-0.288757	19.3972	19.7207	19.5659	19.5613	19.905	19.7255	19.9197	19.85
G4LZN2	tr|G4LZN2|G4LZN2_SCHMA Serpin, putative OS=Schistosoma mansoni GN=Smp_062120 PE=3 SV=1	4	43.886	-1.15317	17.7698	18.1426	17.742	17.8848	19.2381	18.5056	19.3703	19.038
G4LZN6	tr|G4LZN6|G4LZN6_SCHMA Serpin, putative OS=Schistosoma mansoni GN=Smp_062080 PE=3 SV=1	10	43.382	-1.77195	19.7245	20.0014	19.6628	19.7962	21.8345	21.622	21.2481	21.5682
G4LZN7;G4LZN8	tr|G4LZN7|G4LZN7_SCHMA Sulfide quinone reductase, putative OS=Schistosoma mansoni GN=Smp_062070.1 PE=4 SV=1;tr|G4LZN8|G4LZN8_SCHMA Sulfide quinone reductase, putative OS=Schistosoma mansoni GN=Smp_062070.2 PE=4 SV=1	14	50.922	-0.799967	19.3863	20.0875	20.3083	19.9274	21.0864	20.0292	21.0664	20.7273
G4LZP1;G4LZP2	tr|G4LZP1|G4LZP1_SCHMA Uncharacterized protein (Fragment) OS=Schistosoma mansoni GN=Smp_155510.2 PE=4 SV=1;tr|G4LZP2|G4LZP2_SCHMA Uncharacterized protein (Fragment) OS=Schistosoma mansoni GN=Smp_155510.1 PE=4 SV=1	1	22.436	0.197152	18.2684	17.6106	17.9255	17.9348	17.8661	17.8008	17.5461	17.7377
G4LZP4	tr|G4LZP4|G4LZP4_SCHMA Uncharacterized protein OS=Schistosoma mansoni GN=Smp_096840 PE=4 SV=1	1	15.585	0.0917156	17.7625	18.8319	18.6195	18.4046	18.2288	18.2869	18.423	18.3129
G4LZQ3	tr|G4LZQ3|G4LZQ3_SCHMA Uncharacterized protein OS=Schistosoma mansoni GN=Smp_080670 PE=4 SV=1	4	15.527	-0.468241	18.6108	18.9836	18.9175	18.8373	19.0292	19.2795	19.608	19.3056
G4LZQ9	tr|G4LZQ9|G4LZQ9_SCHMA Uncharacterized protein OS=Schistosoma mansoni GN=Smp_080620 PE=4 SV=1	12	94.436	-0.0823786	18.6843	19.3559	19.429	19.1564	19.4817	17.9537	20.2809	19.2388
G4LZR0	tr|G4LZR0|G4LZR0_SCHMA Uncharacterized protein OS=Schistosoma mansoni GN=Smp_080610 PE=4 SV=1	2	19.51	0.275392	19.2571	19.0856	19.024	19.1223	19.0176	19.1153	18.4077	18.8469
G4LZT0	tr|G4LZT0|G4LZT0_SCHMA Uncharacterized protein OS=Schistosoma mansoni GN=Smp_174490 PE=4 SV=1	10	61.351	-0.722524	20.7498	21.1563	21.314	21.0734	21.9242	21.6662	21.7973	21.7959
G4LZU3	tr|G4LZU3|G4LZU3_SCHMA Polypyrimidine tract binding protein, putative OS=Schistosoma mansoni GN=Smp_138050.2 PE=4 SV=1	5	65.287	-0.355448	17.944	17.9892	19.7264	18.5532	18.2855	18.5016	19.9388	18.9087
G4LZU4	tr|G4LZU4|G4LZU4_SCHMA Phosphatidylinositol transfer protein OS=Schistosoma mansoni GN=Smp_029310 PE=4 SV=1	4	27.48	0.983186	20.181	20.7069	20.4901	20.4593	19.378	19.6534	19.397	19.4761
G4LZU7	tr|G4LZU7|G4LZU7_SCHMA Uncharacterized protein OS=Schistosoma mansoni GN=Smp_138010 PE=4 SV=1	1	15.653	0.542625	17.6617	17.8879	17.2333	17.5943	16.9574	17.1459		17.0517
G4LZV4	tr|G4LZV4|G4LZV4_SCHMA Uncharacterized protein OS=Schistosoma mansoni GN=Smp_094920 PE=4 SV=1	10	36.371	0.306125	21.7357	21.9613	21.8195	21.8388	21.3013	21.6424	21.6545	21.5327
G4LZY0	tr|G4LZY0|G4LZY0_SCHMA Cofilin OS=Schistosoma mansoni GN=Smp_195080 PE=3 SV=1	8	15.659	0.222432	23.952	23.9671	23.8208	23.9133	23.5468	23.6434	23.8824	23.6909
G4LZY3	tr|G4LZY3|G4LZY3_SCHMA Proteasome subunit alpha type OS=Schistosoma mansoni GN=Smp_067890 PE=3 SV=1	11	23.257	0.437629	23.8288	23.7035	23.3395	23.6239	23.3037	23.3811	22.874	23.1863
G4LZY4	tr|G4LZY4|G4LZY4_SCHMA Cdc37-related OS=Schistosoma mansoni GN=Smp_067900 PE=4 SV=1	18	45.374	-0.679754	23.7148	23.4948	23.3303	23.5133	23.9486	24.1569	24.4738	24.1931
G4LZY7	tr|G4LZY7|G4LZY7_SCHMA 28 kDa heat-and acid-stable phosphoprotein (PDGF-associated protein) (PAP) (PDGFA-associated protein 1) (PAP1), putative OS=Schistosoma mansoni GN=Smp_067930 PE=4 SV=1	4	22.55	0.914509	19.3372	18.9656	17.2655	18.5228	18.9194	18.8909	15.0144	17.6083
G4LZZ5;G4LZZ6;G4LZZ4;G4LZZ7;G4LZZ8	tr|G4LZZ5|G4LZZ5_SCHMA Ubiquitin conjugating enzyme E2, putative OS=Schistosoma mansoni GN=Smp_067980.3 PE=3 SV=1;tr|G4LZZ6|G4LZZ6_SCHMA Ubiquitin conjugating enzyme E2, putative OS=Schistosoma mansoni GN=Smp_067980.4 PE=3 SV=1;tr|G4LZZ4|G4LZZ4_SCHMA Ubiqu	3	12.679	1.2902	22.7684	22.7266	22.255	22.5833	21.3921	21.6152	20.8721	21.2931
G4M000	tr|G4M000|G4M000_SCHMA Uncharacterized protein OS=Schistosoma mansoni GN=Smp_159000 PE=4 SV=1	2	166.88	-1.18495			13.031	13.031	14.8658	13.7659	14.0161	14.2159
G4M005	tr|G4M005|G4M005_SCHMA Uncharacterized protein OS=Schistosoma mansoni GN=Smp_133310 PE=4 SV=1	3	14.03	-2.32163		17.8338	15.9617	16.8978	18.4686	20.0113	19.1783	19.2194
G4M010	tr|G4M010|G4M010_SCHMA Low-density lipoprotein receptor (Ldl) OS=Schistosoma mansoni GN=Smp_020550 PE=4 SV=1	24	67.868	-1.59485	21.1168	21.0914	21.6973	21.3018	23.7413	22.7208	22.2278	22.8967
G4M012	tr|G4M012|G4M012_SCHMA Ccr4-not transcription complex, putative (Fragment) OS=Schistosoma mansoni GN=Smp_198980 PE=4 SV=1	1	90.335	-0.905417	16.7746	16.5407	16.7447	16.6867	17.754	17.4302		17.5921
G4M014	tr|G4M014|G4M014_SCHMA Uncharacterized protein OS=Schistosoma mansoni GN=Smp_164500 PE=4 SV=1	4	56.055	0.265786	16.8185	17.4534	16.816	17.0293	16.318	16.902	17.0706	16.7635
G4M018	tr|G4M018|G4M018_SCHMA Titin, putative OS=Schistosoma mansoni GN=Smp_126240 PE=4 SV=1	32	674.28	-0.146057	16.1572	16.4726	16.447	16.359	16.6764	15.8471	16.9915	16.505
G4M023	tr|G4M023|G4M023_SCHMA Leukotriene A4 hydrolase (M01 family) OS=Schistosoma mansoni GN=Smp_007550 PE=4 SV=1	27	70.894	-0.502953	22.2791	22.2352	22.2978	22.2707	22.922	23.0224	22.3766	22.7737
G4M024	tr|G4M024|G4M024_SCHMA 3-5 exoribonuclease csl4-related OS=Schistosoma mansoni GN=Smp_007540 PE=4 SV=1	3	27.225	1.75012	18.917	18.7822	20.5238	19.4077	17.9999	16.2663	18.7064	17.6575
G4M028	tr|G4M028|G4M028_SCHMA DNA helicase OS=Schistosoma mansoni GN=Smp_094140 PE=3 SV=1	27	93.325	-0.592729	19.6659	19.8431	19.892	19.8004	20.2199	20.5741	20.3853	20.3931
G4M039	tr|G4M039|G4M039_SCHMA Neutral alpha-glucosidase ab (Glucosidase II alpha subunit) (Alpha glucosidase 2),putative OS=Schistosoma mansoni GN=Smp_018760 PE=3 SV=1	27	113.28	-1.05401	20.5128	20.5173	20.8435	20.6246	21.5489	21.9613	21.5256	21.6786
G4M046	tr|G4M046|G4M046_SCHMA Subfamily S1B unassigned peptidase (S01 family) OS=Schistosoma mansoni GN=Smp_211270 PE=4 SV=1	11	60.909	-1.04136	19.9912	20.791	20.9082	20.5635	21.6165	21.8341	21.3639	21.6048
G4M047	tr|G4M047|G4M047_SCHMA V-type proton ATPase subunit C OS=Schistosoma mansoni GN=Smp_211280 PE=3 SV=1	4	38.16	-0.442796	18.19	18.7191	18.3606	18.4232	19.1363	19.6553	17.8065	18.866
G4M048	tr|G4M048|G4M048_SCHMA Subfamily S1B unassigned peptidase (S01 family) OS=Schistosoma mansoni GN=Smp_211260 PE=4 SV=1	4	31.039	-0.178309	16.4703	17.6883	17.7835	17.314	17.7041	17.7902	16.9828	17.4923
G4M051;G4M050	tr|G4M051|G4M051_SCHMA 40S ribosomal protein S3a OS=Schistosoma mansoni GN=Smp_073880.1 PE=3 SV=1;tr|G4M050|G4M050_SCHMA 40S ribosomal protein S3a OS=Schistosoma mansoni GN=Smp_073880.2 PE=3 SV=1	17	29.287	0.797667	23.6877	23.8164	24.0874	23.8638	23.2103	21.6228	24.3653	23.0662
G4M055	tr|G4M055|G4M055_SCHMA Rac-alpha serine/threonine-protein kinase (Ec 2.7.1.37) (Rac-pk-alpha)(Akt1 kinase) (Protein kinase b) (Pkb) (C-akt) (Thymoma viral proto-oncogene) OS=Schistosoma mansoni GN=Smp_073930.2 PE=4 SV=1	4	88.665	-0.122253	17.7085	17.2577	16.9759	17.3141	18.0529	18.1443	16.1117	17.4363
G4M057	tr|G4M057|G4M057_SCHMA WD-repeat protein, putative OS=Schistosoma mansoni GN=Smp_073940 PE=4 SV=1	20	68.776	-1.21761	20.3519	20.6898	21.0934	20.7117	21.8518	22.2008	21.7354	21.9293
G4M060	tr|G4M060|G4M060_SCHMA Uncharacterized protein OS=Schistosoma mansoni GN=Smp_211140 PE=3 SV=1	3	28.244	1.01327	16.649	18.0476	18.302	17.6662	17.2157	16.4758	16.2672	16.6529
G4M062	tr|G4M062|G4M062_SCHMA Uncharacterized protein OS=Schistosoma mansoni GN=Smp_074000 PE=4 SV=1	8	33.879	-0.441148	20.9449	20.5604	20.5278	20.6777	21.0756	21.3213	20.9596	21.1188
G4M074	tr|G4M074|G4M074_SCHMA Protein kiaa0174, putative OS=Schistosoma mansoni GN=Smp_057650 PE=4 SV=1	3	37.631	-0.147348	19.085	18.8489	18.8195	18.9178	19.2311	19.0088	18.9557	19.0652
G4M078	tr|G4M078|G4M078_SCHMA Biotin-protein ligase OS=Schistosoma mansoni GN=Smp_153150 PE=4 SV=1	1	71.921	-0.361351			15.3235	15.3235	15.8127	15.2947	15.947	15.6848
G4M088	tr|G4M088|G4M088_SCHMA Phosphatidylserine receptor, putative OS=Schistosoma mansoni GN=Smp_137240 PE=4 SV=1	2	88.113	F only	15.9951	14.4907	15.9725	15.4861				N/A
G4M090	tr|G4M090|G4M090_SCHMA Kif21, putative OS=Schistosoma mansoni GN=Smp_137230 PE=3 SV=1	4	155.5	-1.87868		13.0775		13.0775	15.0995	14.8429	14.9262	14.9562
G4M091	tr|G4M091|G4M091_SCHMA Uncharacterized protein OS=Schistosoma mansoni GN=Smp_027750 PE=4 SV=1	1	45.96	M only				N/A	17.1392	16.5418	16.8561	16.8457
G4M097	tr|G4M097|G4M097_SCHMA Frataxin homolog, mitochondrial,putative OS=Schistosoma mansoni GN=Smp_137190 PE=4 SV=1	3	18.594	0.430573	18.6211	17.3261	16.9517	17.633	17.6273	17.6612	16.3187	17.2024
G4M099;G4M0A0	tr|G4M099|G4M099_SCHMA Programmed cell death, putative OS=Schistosoma mansoni GN=Smp_072110.2 PE=4 SV=1;tr|G4M0A0|G4M0A0_SCHMA Programmed cell death, putative OS=Schistosoma mansoni GN=Smp_072110.1 PE=4 SV=1	14	57.138	1.54612	20.904	21.1097	21.3533	21.1223	20.0103	17.6579	21.0604	19.5762
G4M0A1	tr|G4M0A1|G4M0A1_SCHMA Ccr4-not transcription complex, putative OS=Schistosoma mansoni GN=Smp_072100 PE=4 SV=1	2	26.865	-2.33702			15.1083	15.1083	17.8776	17.2126	17.2457	17.4453
G4M0A7	tr|G4M0A7|G4M0A7_SCHMA Xap-5 protein-related OS=Schistosoma mansoni GN=Smp_161290 PE=4 SV=1	3	44.779	0.232042	16.3765	15.2743	16.883	16.178	15.7673	16.1246		15.9459
G4M0B9;G4M0B8	tr|G4M0B9|G4M0B9_SCHMA Cle7, putative OS=Schistosoma mansoni GN=Smp_071960.1 PE=4 SV=1;tr|G4M0B8|G4M0B8_SCHMA Cle7, putative OS=Schistosoma mansoni GN=Smp_071960.2 PE=4 SV=1	13	27.86	1.26282	22.4215	22.3807	21.9771	22.2598	21.1582	21.2001	20.6326	20.997
G4M0D7	tr|G4M0D7|G4M0D7_SCHMA Uncharacterized protein OS=Schistosoma mansoni GN=Smp_104450 PE=4 SV=1	5	42.388	M only				N/A	19.4818	18.3792	19.8699	19.2436
G4M0E0;G4M0D9	tr|G4M0E0|G4M0E0_SCHMA Lysine--tRNA ligase OS=Schistosoma mansoni GN=Smp_104470.1 PE=3 SV=1;tr|G4M0D9|G4M0D9_SCHMA Lysine--tRNA ligase OS=Schistosoma mansoni GN=Smp_104470.2 PE=4 SV=1	28	71.517	0.66199	22.8696	22.8878	22.731	22.8295	22.1534	22.4076	21.9414	22.1675
G4M0F3	tr|G4M0F3|G4M0F3_SCHMA Sap18, putative OS=Schistosoma mansoni GN=Smp_085480 PE=4 SV=1	7	26.52	1.01344	19.7028	20.018	20.3249	20.0153	18.9721	18.641	19.3923	19.0018
G4M0F5	tr|G4M0F5|G4M0F5_SCHMA Elongator complex protein 3 OS=Schistosoma mansoni GN=Smp_085500 PE=3 SV=1	12	64.051	2.34495	19.6958	19.8322	19.8997	19.8092	17.8656	16.907	17.6202	17.4643
G4M0F7;Q15ET5	tr|G4M0F7|G4M0F7_SCHMA Vacuolar ATP synthase subunit e, putative OS=Schistosoma mansoni GN=Smp_085520 PE=3 SV=1;tr|Q15ET5|Q15ET5_SCHMA Vacuolar ATP synthase subunit E-like protein OS=Schistosoma mansoni PE=2 SV=1	7	26.581	-0.63451	18.7524	18.8795	19.0996	18.9105	19.6577	19.4651	19.5122	19.545
G4M0F8	tr|G4M0F8|G4M0F8_SCHMA Synapse-associated protein, putative OS=Schistosoma mansoni GN=Smp_085530 PE=4 SV=1	7	44.472	1.33582	19.2985	18.9442	18.8806	19.0411	18.1377	16.9264	18.0519	17.7053
G4M0G4;G4M0G3;G4M0G1;G4M0G2;G4M0F9;G4M0G0	tr|G4M0G4|G4M0G4_SCHMA Myosin heavy chain, putative OS=Schistosoma mansoni GN=Smp_085540.6 PE=3 SV=1;tr|G4M0G3|G4M0G3_SCHMA Myosin heavy chain OS=Schistosoma mansoni GN=Smp_085540.3 PE=3 SV=1;tr|G4M0G1|G4M0G1_SCHMA Myosin heavy chain, putative OS=Schistoso	98	222.18	-0.41016	22.4745	23.0379	22.6637	22.7254	23.0111	22.8464	23.5491	23.1355
G4M0I0	tr|G4M0I0|G4M0I0_SCHMA Uncharacterized protein OS=Schistosoma mansoni GN=Smp_166000 PE=4 SV=1	6	35.709	-1.5261	13.5353	17.4719	17.5356	16.1809	18.0185	18.6124	16.4903	17.707
G4M0I1	tr|G4M0I1|G4M0I1_SCHMA Ankyrin repeat-containing, putative OS=Schistosoma mansoni GN=Smp_166010 PE=4 SV=1	23	141.94	-0.357391	19.8715	19.9032	19.8749	19.8832	20.3469	20.42	19.9547	20.2406
G4M0I3	tr|G4M0I3|G4M0I3_SCHMA Erythrocyte membrane protein, putative OS=Schistosoma mansoni GN=Smp_166030 PE=4 SV=1	19	227.53	0.408525	18.3144	18.8892	19.1352	18.7796	17.9917	17.9015	19.2201	18.3711
G4M0I4	tr|G4M0I4|G4M0I4_SCHMA Uncharacterized protein OS=Schistosoma mansoni GN=Smp_081370 PE=4 SV=1	4	18.691	-0.282193	20.8276	20.7964	20.7543	20.7927	20.9703	21.0837	21.1708	21.0749
G4M0I5	tr|G4M0I5|G4M0I5_SCHMA Tumor protein d52, putative OS=Schistosoma mansoni GN=Smp_081380 PE=4 SV=1	6	28.296	0.625844	20.0219	19.9092	20.0709	20.0007	19.449	19.3692	19.3063	19.3748
G4M0J4	tr|G4M0J4|G4M0J4_SCHMA Alpha-mannosidase OS=Schistosoma mansoni GN=Smp_143430 PE=3 SV=1	5	140.68	-0.887498	14.7204	15.5143	16.3079	15.5142	16.1215	16.2374	16.8462	16.4017
G4M0K4;G4M0K5	tr|G4M0K4|G4M0K4_SCHMA 60S ribosomal protein L10, putative OS=Schistosoma mansoni GN=Smp_013200.2 PE=4 SV=1;tr|G4M0K5|G4M0K5_SCHMA 60S ribosomal protein L10, putative OS=Schistosoma mansoni GN=Smp_013200.1 PE=4 SV=1	10	25.112	1.07945	25.1692	24.9085	24.7181	24.9319	23.86	23.2805	24.4169	23.8525
G4M0L0	tr|G4M0L0|G4M0L0_SCHMA Poly [ADP-ribose] polymerase OS=Schistosoma mansoni GN=Smp_129260 PE=4 SV=1	21	109.31	-1.46777	18.2161	18.7591	18.985	18.6534	20.0461	20.1574	20.16	20.1212
G4M0L1	tr|G4M0L1|G4M0L1_SCHMA Riboflavin kinase/fmn adenylyltransferase,putative OS=Schistosoma mansoni GN=Smp_013150 PE=4 SV=1	1	17.682	0.351185	16.4785	16.8261	16.4345	16.5797	16.1309		16.3261	16.2285
G4M0L4	tr|G4M0L4|G4M0L4_SCHMA Uncharacterized protein OS=Schistosoma mansoni GN=Smp_129240 PE=4 SV=1	5	40.44	1.2256	18.1911	16.9477	16.9745	17.3711	16.6151	15.6759		16.1455
G4M0L7	tr|G4M0L7|G4M0L7_SCHMA Tyrosine--tRNA ligase OS=Schistosoma mansoni GN=Smp_129210 PE=3 SV=1	18	116.06	-0.281688	17.3637	18.3041	18.006	17.8912	18.0908	17.4394	18.9886	18.1729
G4M0M2	tr|G4M0M2|G4M0M2_SCHMA Uncharacterized protein OS=Schistosoma mansoni GN=Smp_174850 PE=4 SV=1	3	20.086	0.168192	19.8159	19.8555	19.4429	19.7048	19.8041	19.8145	18.9912	19.5366
G4M0M6;G4M0M5;G4M0M7	tr|G4M0M6|G4M0M6_SCHMA Adenosylhomocysteinase OS=Schistosoma mansoni GN=Smp_096020.3 PE=3 SV=1;tr|G4M0M5|G4M0M5_SCHMA Adenosylhomocysteinase OS=Schistosoma mansoni GN=Smp_096020.2 PE=3 SV=1;tr|G4M0M7|G4M0M7_SCHMA Adenosylhomocysteinase,putative OS=Schistos	3	57.558	-0.560948	18.131	17.6582	17.8758	17.8883	18.3447	18.561	18.4421	18.4493
G4M0M8	tr|G4M0M8|G4M0M8_SCHMA DNAj homolog subfamily A member, putative OS=Schistosoma mansoni GN=Smp_096010 PE=3 SV=1	14	50.224	1.59502	20.6734	20.5629	20.8006	20.679	18.7218	18.9138	19.6163	19.084
G4M0N4	tr|G4M0N4|G4M0N4_SCHMA Protein phosphatase inhibitor, putative OS=Schistosoma mansoni GN=Smp_097560 PE=4 SV=1	2	17.502	-0.629525	19.5936	19.9793	18.8925	19.4885	20.0346	20.2236	20.0958	20.118
G4M0N7	tr|G4M0N7|G4M0N7_SCHMA Valine-tRNA ligase OS=Schistosoma mansoni GN=Smp_097590 PE=3 SV=1	31	134.76	-0.258058	16.7848	18.9767	19.4654	18.409	19.0403	15.8455	21.1153	18.667
G4M0N8	tr|G4M0N8|G4M0N8_SCHMA Uncharacterized protein OS=Schistosoma mansoni GN=Smp_175810 PE=4 SV=1	4	28.607	0.689839	20.0026	19.5567	18.8145	19.4579	19.1062	18.6995	18.4986	18.7681
G4M0P7;G4M0P8;G4M0P6	tr|G4M0P7|G4M0P7_SCHMA Cell division control protein 48 aaa family protein (Transitional endoplasmic reticulum atpase),putative OS=Schistosoma mansoni GN=Smp_018240.3 PE=3 SV=1;tr|G4M0P8|G4M0P8_SCHMA Cell division control protein 48 aaa family protein (Tra	41	88.808	-0.434769	23.5335	23.474	23.5377	23.5151	23.9234	23.6538	24.2723	23.9498
G4M0Q4	tr|G4M0Q4|G4M0Q4_SCHMA CCAAT-binding transcription factor, putative OS=Schistosoma mansoni GN=Smp_176340 PE=4 SV=1	2	57.147	0.439843	20.5983	20.4288	19.9886	20.3386	20.1065	20.0236	19.5662	19.8988
G4M0Q5	tr|G4M0Q5|G4M0Q5_SCHMA Uncharacterized protein OS=Schistosoma mansoni GN=Smp_098590 PE=4 SV=1	6	13.281	0.136573	21.4512	21.9481	21.6187	21.6727	21.5671	21.7435	21.2978	21.5361
G4M0S9;G4M0T0	tr|G4M0S9|G4M0S9_SCHMA Poly [ADP-ribose] polymerase OS=Schistosoma mansoni GN=Smp_145810.1 PE=4 SV=1;tr|G4M0T0|G4M0T0_SCHMA Poly [ADP-ribose] polymerase, putative OS=Schistosoma mansoni GN=Smp_145810.2 PE=4 SV=1	8	61.626	0.862441	16.9019	17.7377	17.6717	17.4371	17.0067	16.8277	15.8895	16.5747
G4M0T5;G4M0T4	tr|G4M0T5|G4M0T5_SCHMA Synaptosomal associated protein, putative OS=Schistosoma mansoni GN=Smp_043940.1 PE=4 SV=1;tr|G4M0T4|G4M0T4_SCHMA Synaptosomal associated protein, putative OS=Schistosoma mansoni GN=Smp_043940.2 PE=4 SV=1	8	26.757	-1.12291	19.1284	19.2456	19.0541	19.1427	20.3564	20.1892	20.2511	20.2656
G4M0T7	tr|G4M0T7|G4M0T7_SCHMA DNAj homolog subfamily C member, putative OS=Schistosoma mansoni GN=Smp_043970 PE=4 SV=1	3	28.46	0.78061	20.6789	20.7614	20.1419	20.5274	19.7591	20.1217	19.3596	19.7468
G4M0U2	tr|G4M0U2|G4M0U2_SCHMA Synbindin, putative OS=Schistosoma mansoni GN=Smp_028940 PE=4 SV=1	4	26.998	-2.40533	15.7074			15.7074	17.3073	19.0245	18.0064	18.1127
G4M0U3	tr|G4M0U3|G4M0U3_SCHMA Thioredoxin domain containing protein 9-related OS=Schistosoma mansoni GN=Smp_028930 PE=4 SV=1	5	27.241	-1.89332	17.2233	17.7972	17.8393	17.6199	19.3541	19.6828	19.5028	19.5132
G4M0V2	tr|G4M0V2|G4M0V2_SCHMA Transgelin OS=Schistosoma mansoni GN=Smp_086330.1 PE=3 SV=1	9	21.204	0.602917	21.1493	21.63	20.5082	21.0958	20.4034	19.899	21.1763	20.4929
G4M0V3	tr|G4M0V3|G4M0V3_SCHMA Uncharacterized protein OS=Schistosoma mansoni GN=Smp_199070 PE=4 SV=1	13	88.106	-0.568899	17.2983	17.7167	18.1962	17.737	18.4764	17.6498	18.7916	18.3059
G4M0V9	tr|G4M0V9|G4M0V9_SCHMA SH3 domain-binding glutamic acid-rich-like protein OS=Schistosoma mansoni GN=Smp_033330 PE=3 SV=1	2	11.926	-0.582945	17.1811	19.1244	17.703	18.0028	19.3896	17.782		18.5858
G4M0W1	tr|G4M0W1|G4M0W1_SCHMA Katanin p60 ATPase-containing subunit A-like 2 OS=Schistosoma mansoni GN=KATNAL2 PE=3 SV=1	1	54.874	-0.121505	21.8676	20.9995	21.0268	21.298	21.5109	21.3503	21.3973	21.4195
G4M0W7;G4M0W8	tr|G4M0W7|G4M0W7_SCHMA Family C48 unassigned peptidase (C48 family) OS=Schistosoma mansoni GN=Smp_033260.2 PE=4 SV=1;tr|G4M0W8|G4M0W8_SCHMA Family C48 unassigned peptidase (C48 family) OS=Schistosoma mansoni GN=Smp_033260.1 PE=4 SV=1	4	64.713	1.11557	16.884	16.3581	16.8858	16.7093	16.394	15.0807	15.3065	15.5937
G4M0X1	tr|G4M0X1|G4M0X1_SCHMA Serine/threonine kinase OS=Schistosoma mansoni GN=Smp_180400 PE=4 SV=1	5	63.984	0.419513	16.3857	16.3233	16.1337	16.2809	15.8614			15.8614
G4M0X2	tr|G4M0X2|G4M0X2_SCHMA Ubiquilin 1,2, putative OS=Schistosoma mansoni GN=Smp_010290 PE=4 SV=1	9	58.648	0.471118	22.6063	22.9157	22.0995	22.5405	22.5813	22.2692	21.3577	22.0694
G4M0X4	tr|G4M0X4|G4M0X4_SCHMA Uncharacterized protein OS=Schistosoma mansoni GN=Smp_127620 PE=4 SV=1	9	229.63	-1.65417	17.1966	13.7235	13.4403	14.7868			16.441	16.441
G4M0Y0	tr|G4M0Y0|G4M0Y0_SCHMA GMP synthetase (Glutamine-hydrolysing) OS=Schistosoma mansoni GN=Smp_063830 PE=4 SV=1	30	81.371	0.813948	22.4941	22.5846	22.5812	22.5533	21.9117	21.7214	21.5849	21.7393
G4M0Y2	tr|G4M0Y2|G4M0Y2_SCHMA Uncharacterized protein OS=Schistosoma mansoni GN=Smp_156570 PE=4 SV=1	3	22.447	1.49823	16.4892	17.2872	18.0699	17.2821			15.7839	15.7839
G4M0Y5;G4M0Y6	tr|G4M0Y5|G4M0Y5_SCHMA Ubiquitin-conjugating enzyme E2 j2, putative OS=Schistosoma mansoni GN=Smp_059750.1 PE=3 SV=1;tr|G4M0Y6|G4M0Y6_SCHMA Ubiquitin-conjugating enzyme E2 j2, putative OS=Schistosoma mansoni GN=Smp_059750.2 PE=3 SV=1	1	25.358	1.06625	18.5657	18.3229	18.0918	18.3268	17.0459	17.4752		17.2605
G4M0Y8	tr|G4M0Y8|G4M0Y8_SCHMA Uncharacterized protein OS=Schistosoma mansoni GN=Smp_154330 PE=4 SV=1	5	28.589	0.519396	19.4864	18.2264	19.062	18.9249	18.5856	18.6436	17.9875	18.4055
G4M0Z5	tr|G4M0Z5|G4M0Z5_SCHMA Zinc finger protein, putative OS=Schistosoma mansoni GN=Smp_095680 PE=4 SV=1	5	22.695	1.16578	20.3461	20.4828	19.5035	20.1108	19.0929	19.5641	18.1781	18.945
G4M0Z7	tr|G4M0Z7|G4M0Z7_SCHMA Uncharacterized protein OS=Schistosoma mansoni GN=Smp_174620 PE=4 SV=1	3	18.249	1.07699	18.1079	17.1182		17.613	17.0638	16.809	15.7354	16.5361
G4M103	tr|G4M103|G4M103_SCHMA Vesicular integral-membrane protein vip36 (Mannose-binding lectin 2)-related OS=Schistosoma mansoni GN=Smp_174580 PE=4 SV=1	9	34.881	-0.10974	21.4332	21.3392	21.3083	21.3602	21.6062	21.3917	21.4121	21.47
G4M115	tr|G4M115|G4M115_SCHMA Uncharacterized protein OS=Schistosoma mansoni GN=Smp_212230 PE=4 SV=1	4	30.062	0.288951	20.637	20.4406	20.4657	20.5144	20.3404	20.5579	19.7782	20.2255
G4M120;G4M121	tr|G4M120|G4M120_SCHMA Uncharacterized protein OS=Schistosoma mansoni GN=Smp_176260.1 PE=4 SV=1;tr|G4M121|G4M121_SCHMA Uncharacterized protein OS=Schistosoma mansoni GN=Smp_176260.2 PE=4 SV=1	1	21.905	3.91478	20.3789	20.0383	16.765	19.0607			15.1459	15.1459
G4M126;G4M127	tr|G4M126|G4M126_SCHMA Eukaryotic translation initiation factor 3 subunit E OS=Schistosoma mansoni GN=Smp_176230.1 PE=3 SV=1;tr|G4M127|G4M127_SCHMA Eukaryotic translation initiation factor 3 subunit E OS=Schistosoma mansoni GN=Smp_176230.2 PE=3 SV=1	15	51.923	0.479676	20.9748	21.1223	21.4047	21.1673	20.7934	21.0334	20.236	20.6876
G4M133	tr|G4M133|G4M133_SCHMA Surfeit locus protein, putative OS=Schistosoma mansoni GN=Smp_174450 PE=4 SV=1	1	31.513	-1.93837		16.5286	15.981	16.2548	18.2654	18.1134	18.2007	18.1932
G4M144	tr|G4M144|G4M144_SCHMA Tho2 protein, putative OS=Schistosoma mansoni GN=Smp_086460 PE=4 SV=1	13	194.1	-1.49521	12.5086	15.5151	15.92	14.6479	15.3774		16.9088	16.1431
G4M145;G4M146	tr|G4M145|G4M145_SCHMA Islet cell autoantigen, putative OS=Schistosoma mansoni GN=Smp_126770.1 PE=4 SV=1;tr|G4M146|G4M146_SCHMA Islet cell autoantigen, putative OS=Schistosoma mansoni GN=Smp_126770.2 PE=4 SV=1	3	58.071	-1.09384	16.4745	16.412	16.6615	16.516	17.6573	17.3184	17.8539	17.6098
G4M149;G4M148;G4M150	tr|G4M149|G4M149_SCHMA tRNA pseudouridine synthase OS=Schistosoma mansoni GN=Smp_086450.2 PE=3 SV=1;tr|G4M148|G4M148_SCHMA tRNA pseudouridine synthase OS=Schistosoma mansoni GN=Smp_086450.1 PE=3 SV=1;tr|G4M150|G4M150_SCHMA tRNA pseudouridine synthase OS=Sc	11	47.246	2.3294	19.4738	19.4428	19.7593	19.5586	18.1507	17.254	16.2831	17.2292
G4M152	tr|G4M152|G4M152_SCHMA Uncharacterized protein OS=Schistosoma mansoni GN=Smp_199120 PE=4 SV=1	2	69.466	2.02935	14.3132	15.4577	15.1159	14.9623			12.9329	12.9329
G4M165	tr|G4M165|G4M165_SCHMA Uncharacterized protein OS=Schistosoma mansoni GN=Smp_054610 PE=4 SV=1	6	135.66	1.84444	15.5326	14.5171	16.1156	15.3884	12.6166	13.6375	14.3778	13.544
G4M170	tr|G4M170|G4M170_SCHMA Meiotic checkpoint regulator cut4, putative OS=Schistosoma mansoni GN=Smp_151380 PE=4 SV=1	17	300.42	0.568044	14.6469	14.2589	15.2351	14.7136	13.0976	12.8866	16.4525	14.1456
G4M179	tr|G4M179|G4M179_SCHMA WD-repeat protein, putative OS=Schistosoma mansoni GN=Smp_104870 PE=4 SV=1	7	46.495	0.240399	17.7102	18.2121	18.8372	18.2532	17.7089	17.415	18.9144	18.0128
G4M183	tr|G4M183|G4M183_SCHMA Proteasome subunit alpha type OS=Schistosoma mansoni GN=Smp_070930 PE=3 SV=1	10	27.774	-0.000271118	23.5047	23.522	23.4444	23.4904	23.5807	23.6865	23.2047	23.4907
G4M184	tr|G4M184|G4M184_SCHMA SLAP, putative (Fragment) OS=Schistosoma mansoni GN=Smp_070920.1 PE=4 SV=1	16	81.29	-0.428236	18.5098	18.859	18.7168	18.6952	19.0353	19.066	19.269	19.1235
G4M190	tr|G4M190|G4M190_SCHMA Ras suppressor protein 1, rsu1, putative OS=Schistosoma mansoni GN=Smp_114090 PE=4 SV=1	3	26.083	-0.869246	16.8482	17.8027	17.106	17.2523	18.2159	18.0113	18.1373	18.1215
G4M193	tr|G4M193|G4M193_SCHMA Sulfhydryl oxidase OS=Schistosoma mansoni GN=Smp_098710 PE=4 SV=1	4	47.815	0.577563	18.0495	18.3586	18.244	18.2174	17.9822	17.1686	17.7687	17.6398
G4M196	tr|G4M196|G4M196_SCHMA Transducin beta-like OS=Schistosoma mansoni GN=Smp_098760 PE=4 SV=1	5	74.49	-0.458585	18.0143	18.3839	17.9911	18.1297	18.4347	18.7593	18.5709	18.5883
G4M1B3	tr|G4M1B3|G4M1B3_SCHMA Uncharacterized protein OS=Schistosoma mansoni GN=Smp_036930 PE=4 SV=1	8	66.438	-1.17043	15.9312	17.5084	18.5938	17.3445	18.982	18.9418	17.6209	18.5149
G4M1B6	tr|G4M1B6|G4M1B6_SCHMA Uncharacterized protein OS=Schistosoma mansoni GN=Smp_036950 PE=4 SV=1	11	74.215	-1.26509	16.2912	17.3897	17.5619	17.0809	18.2687	18.0263	18.7429	18.346
G4M1B8	tr|G4M1B8|G4M1B8_SCHMA Dynein heavy chain, putative OS=Schistosoma mansoni GN=Smp_159840 PE=4 SV=1	2	432.99	-1.2066	14.1662	13.5121	13.9444	13.8743	14.5853	15.5931	15.0642	15.0809
G4M1D1	tr|G4M1D1|G4M1D1_SCHMA Zinc finger Ran-binding domain-containing protein 2 OS=Schistosoma mansoni GN=Smp_082560.1 PE=3 SV=1	7	31.808	0.182125	20.2191	20.1456	19.7646	20.0431	19.9182	19.8813	19.7834	19.861
G4M1E0	tr|G4M1E0|G4M1E0_SCHMA Ribonuclease pH related OS=Schistosoma mansoni GN=Smp_056900 PE=4 SV=1	2	26.769	0.726351	18.446	18.3629	17.1584	17.9891	17.0244	17.5011		17.2628
G4M1E1	tr|G4M1E1|G4M1E1_SCHMA Nitrilase-related OS=Schistosoma mansoni GN=Smp_056890.1 PE=4 SV=1	19	64.055	-0.0969938	21.0662	21.2727	21.1307	21.1565	21.1285	21.42	21.212	21.2535
G4M1E3	tr|G4M1E3|G4M1E3_SCHMA Radical sam proteins, putative OS=Schistosoma mansoni GN=Smp_152690 PE=4 SV=1	6	90.883	0.452643	17.065	17.4739	17.6788	17.4059	17.7986	16.2739	16.7874	16.9533
G4M1E4	tr|G4M1E4|G4M1E4_SCHMA Snf5, putative OS=Schistosoma mansoni GN=Smp_056860 PE=4 SV=1	3	50.203	0.0557105		17.7463	18.248	17.9972	18.0309	18.2786	17.5148	17.9414
G4M1F3;Q15ER7	tr|G4M1F3|G4M1F3_SCHMA 60S ribosomal protein L14, putative OS=Schistosoma mansoni GN=Smp_175740.1 PE=4 SV=1;tr|Q15ER7|Q15ER7_SCHMA 60S ribosomal protein L14, putative OS=Schistosoma mansoni GN=Smp_175740.2 PE=2 SV=1	10	15.181	0.494443	23.9385	23.9685	24.1589	24.022	23.7268	22.8501	24.0056	23.5275
G4M1F9	tr|G4M1F9|G4M1F9_SCHMA Upstream transcription factor 1, usf1, putative OS=Schistosoma mansoni GN=Smp_170530 PE=4 SV=1	3	97.047	-1.01052	15.7999	15.9448	15.154	15.6329	16.7606	16.329	16.8405	16.6434
G4M1G1	tr|G4M1G1|G4M1G1_SCHMA Tip120, putative OS=Schistosoma mansoni GN=Smp_170510 PE=4 SV=1	25	145.66	1.04327	18.8315	19.1842	19.1898	19.0685	17.9015	17.0916	19.0825	18.0252
G4M1G4	tr|G4M1G4|G4M1G4_SCHMA Dynein heavy chain, putative OS=Schistosoma mansoni GN=Smp_156080 PE=4 SV=1	2	441.08	3.61584	17.0445	16.9724	17.8189	17.2786	12.017		15.3085	13.6628
G4M1G7	tr|G4M1G7|G4M1G7_SCHMA Growth factor receptor-bound protein, putative OS=Schistosoma mansoni GN=Smp_062950 PE=4 SV=1	7	27.04	-1.05665	18.7145	18.5668	17.6503	18.3105	18.9189	19.9031	19.2795	19.3672
G4M1H5	tr|G4M1H5|G4M1H5_SCHMA Calcium-transporting ATPase OS=Schistosoma mansoni GN=Smp_199210 PE=3 SV=1	26	105.07	-1.92304	18.736	19.4445	20.0335	19.4047	21.5276	21.0379	21.4176	21.3277
G4M1I0;G4M1H9	tr|G4M1I0|G4M1I0_SCHMA O-acyltransferase (Membrane bound) domain containing protein, putative OS=Schistosoma mansoni GN=Smp_079860.1 PE=3 SV=1;tr|G4M1H9|G4M1H9_SCHMA O-acyltransferase (Membrane bound) domain containing protein, putative OS=Schistosoma mans	3	52.159	-1.23284		16.3213	17.6359	16.9786	17.9028	18.3436	18.3878	18.2114
G4M1J2	tr|G4M1J2|G4M1J2_SCHMA Formin-like OS=Schistosoma mansoni GN=Smp_144430 PE=4 SV=1	14	117.96	-1.34001	17.5288	17.892	17.4757	17.6322	19.2596	18.6518	19.0052	18.9722
G4M1J4	tr|G4M1J4|G4M1J4_SCHMA Apobec-1 complementation factor-related OS=Schistosoma mansoni GN=Smp_144450 PE=4 SV=1	7	84.394	M only				N/A	18.9859	19.4463	17.911	18.7811
G4M1K0	tr|G4M1K0|G4M1K0_SCHMA Dynamin-associated protein, putative OS=Schistosoma mansoni GN=Smp_135790 PE=4 SV=1	5	180.9	-0.422746	13.5929	13.9948	13.8444	13.8107	13.7712	14.4463	14.4828	14.2335
G4M1K4	tr|G4M1K4|G4M1K4_SCHMA Uncharacterized protein OS=Schistosoma mansoni GN=Smp_212060 PE=4 SV=1	11	74.404	0.546203	19.3131	19.5071	19.491	19.4371	18.8038	18.45	19.4189	18.8909
G4M1K6	tr|G4M1K6|G4M1K6_SCHMA Pyridoxamine 5-phosphate oxidase OS=Schistosoma mansoni GN=Smp_051550.1 PE=3 SV=1	10	28.877	0.890349	22.8468	22.4411	22.3227	22.5369	21.7398	21.9357	21.264	21.6465
G4M1K9	tr|G4M1K9|G4M1K9_SCHMA Acetyltransferase component of pyruvate dehydrogenase complex OS=Schistosoma mansoni GN=Smp_212190 PE=3 SV=1	12	54.382	-0.39554	21.3775	21.3396	21.4653	21.3941	21.8256	22.0586	21.4848	21.7897
G4M1L2	tr|G4M1L2|G4M1L2_SCHMA Phosphatidylinositol-binding clathrin assembly protein, putative OS=Schistosoma mansoni GN=Smp_152550 PE=4 SV=1	3	73.837	-0.673138	15.4114	15.0771	15.6367	15.3751	17.1762	16.034	14.9344	16.0482
G4M1N3	tr|G4M1N3|G4M1N3_SCHMA Chromatin-specific transcription elongation factor 140 kDa subunit (M24 family) OS=Schistosoma mansoni GN=Smp_212210 PE=4 SV=1	6	24.425	-0.538123	19.6123	19.2704	20.3133	19.732	20.0461	19.9224	20.8418	20.2701
G4M1N4	tr|G4M1N4|G4M1N4_SCHMA Chromatin-specific transcription elongation factor 140 kDa subunit (M24 family) OS=Schistosoma mansoni GN=Smp_212220 PE=4 SV=1	16	82.227	-0.768397	19.447	19.5303	20.6409	19.8727	20.5709	20.5853	20.7672	20.6411
G4M1N6	tr|G4M1N6|G4M1N6_SCHMA Tropomyosin, putative OS=Schistosoma mansoni GN=Smp_022170 PE=4 SV=1	5	28.423	-1.05392	19.5524	19.5879	19.1892	19.4432	20.5913	20.6099	20.2901	20.4971
G4M1Q3	tr|G4M1Q3|G4M1Q3_SCHMA Aspartyl-tRNA synthetase, putative (Fragment) OS=Schistosoma mansoni GN=Smp_199340 PE=4 SV=1	5	55.234	0.0945355	18.5693	18.6191	18.8257	18.6714	18.4959	18.8423	18.3923	18.5768
G4M1S7	tr|G4M1S7|G4M1S7_SCHMA Myosin regulatory light chain 2 smooth muscle,putative OS=Schistosoma mansoni GN=Smp_199400 PE=4 SV=1	3	19.593	-0.971753	18.7781	17.8596	16.9759	17.8712	19.2921	18.7895	18.4473	18.8429
G4M1T7	tr|G4M1T7|G4M1T7_SCHMA 26S proteasome non-ATPase regulatory subunit,putative OS=Schistosoma mansoni GN=Smp_047740 PE=4 SV=1	15	30.945	0.0557453	22.6163	22.5191	22.3382	22.4912	22.5605	22.5954	22.1505	22.4355
G4M1U8;G4M1U7	tr|G4M1U8|G4M1U8_SCHMA Voltage-dependent anion-selective channel,putative OS=Schistosoma mansoni GN=Smp_091240.1 PE=4 SV=1;tr|G4M1U7|G4M1U7_SCHMA Voltage-dependent anion-selective channel,putative OS=Schistosoma mansoni GN=Smp_091240.2 PE=4 SV=1	21	31.332	-1.00912	25.0452	25.3489	25.472	25.2887	26.2106	26.5523	26.1306	26.2978
G4M1V2	tr|G4M1V2|G4M1V2_SCHMA Uncharacterized protein OS=Schistosoma mansoni GN=Smp_199500 PE=4 SV=1	5	15.868	1.65463	20.3651	18.3245	20.0422	19.5772	18.4074	16.9008	18.4596	17.9226
G4M1X2	tr|G4M1X2|G4M1X2_SCHMA Lanc-like protein (Fragment) OS=Schistosoma mansoni GN=Smp_118820 PE=4 SV=1	4	11.962	-0.23345	20.9432	20.8703	20.7208	20.8448	21.1012	21.2634	20.8701	21.0782
G4M1X6;G4M1X7;C4QU84	tr|G4M1X6|G4M1X6_SCHMA Uncharacterized protein OS=Schistosoma mansoni GN=Smp_120640.3 PE=4 SV=1;tr|G4M1X7|G4M1X7_SCHMA Uncharacterized protein OS=Schistosoma mansoni GN=Smp_120640.2 PE=4 SV=1;tr|C4QU84|C4QU84_SCHMA Uncharacterized protein OS=Schistosoma ma	3	59.958	0.611152	19.1169	18.8919	18.8346	18.9478	18.1335	18.3461	18.5304	18.3367
G4M201	tr|G4M201|G4M201_SCHMA Stromal cell-derived factor 2-like protein OS=Schistosoma mansoni GN=Smp_199700 PE=4 SV=1	4	17.584	-0.813108	21.6835	21.8013	21.7178	21.7342	22.7025	22.7583	22.1811	22.5473
G4M204	tr|G4M204|G4M204_SCHMA Cytochrome C oxidase assembly protein cox15,putative OS=Schistosoma mansoni GN=Smp_199730 PE=4 SV=1	2	20.717	0.948276			19.0133	19.0133	18.1853	17.7167	18.2931	18.065
G4M209	tr|G4M209|G4M209_SCHMA Steroid dehydrogenase, putative OS=Schistosoma mansoni GN=Smp_009430 PE=3 SV=1	7	35.749	-1.07585	16.3716	15.9787	17.4367	16.5957	16.589	16.1584	20.2672	17.6715
G4M212	tr|G4M212|G4M212_SCHMA Peter pan-related OS=Schistosoma mansoni GN=Smp_212500 PE=4 SV=1	7	89.282	-0.898952	15.2007	14.5824	16.6446	15.4759	17.3128	15.3949	16.4169	16.3749
G4M238	tr|G4M238|G4M238_SCHMA 6-phosphogluconate dehydrogenase,putative OS=Schistosoma mansoni GN=Smp_199860 PE=4 SV=1	2	17.565	0.956118	22.5218	21.8303	22.095	22.1491	21.3832	21.2201	20.9755	21.1929
G4M276	tr|G4M276|G4M276_SCHMA Uncharacterized protein OS=Schistosoma mansoni GN=Smp_206010 PE=4 SV=1	6	34.816	0.540856	21.7167	21.23	21.3512	21.4326	20.942	21.2936	20.4397	20.8918
G4M293	tr|G4M293|G4M293_SCHMA Uncharacterized protein OS=Schistosoma mansoni GN=Smp_206160 PE=4 SV=1	5	17.189	0.729654	18.77	18.9197	20.1038	19.2645	18.3399		18.7298	18.5349
G4M2A8	tr|G4M2A8|G4M2A8_SCHMA Uncharacterized protein OS=Schistosoma mansoni GN=Smp_206290 PE=4 SV=1	2	16.617	F only	18.1796	18.9573	19.7831	18.9733				N/A
G4V597	tr|G4V597|G4V597_SCHMA Putative flap endonuclease-1 OS=Schistosoma mansoni GN=Smp_186980 PE=4 SV=1	2	15.164	-0.33843	20.561	20.5193	18.8653	19.9818	20.6023	20.7037	19.6547	20.3203
G4V5A6	tr|G4V5A6|G4V5A6_SCHMA Uncharacterized protein OS=Schistosoma mansoni GN=Smp_160450 PE=4 SV=1	10	137.61	2.57816	17.4442	16.8352	17.2893	17.1896	14.3006	13.3653	16.1684	14.6114
G4V5B0	tr|G4V5B0|G4V5B0_SCHMA rRNA processing protein ebna1-binding protein-related OS=Schistosoma mansoni GN=Smp_160420 PE=4 SV=1	4	15.649	-0.369036	18.7514	18.2221	19.5438	18.8391			19.2081	19.2081
G4V5D9	tr|G4V5D9|G4V5D9_SCHMA Defective in cullin neddylation protein OS=Schistosoma mansoni GN=Smp_105330 PE=4 SV=1	4	31.045	-0.40212	19.461	19.6026	18.8943	19.3193	19.7587	20.0964	19.3092	19.7214
G4V5E4	tr|G4V5E4|G4V5E4_SCHMA Uncharacterized protein OS=Schistosoma mansoni GN=Smp_181050 PE=4 SV=1	33	117.03	2.34001	20.8969	20.6148	20.6657	20.7258	18.3387	17.8864	18.9323	18.3858
G4V5E6	tr|G4V5E6|G4V5E6_SCHMA Fragile X related 2, frx2 OS=Schistosoma mansoni GN=Smp_016050 PE=4 SV=1	28	86.547	-0.313848	21.889	21.4474	21.8369	21.7244	22.1841	21.3954	22.5354	22.0383
G4V5F5;G4V5F4;G4V5F6	tr|G4V5F5|G4V5F5_SCHMA Putative flotillin-1 OS=Schistosoma mansoni GN=Smp_016200.3 PE=4 SV=1;tr|G4V5F4|G4V5F4_SCHMA Putative flotillin-1 OS=Schistosoma mansoni GN=Smp_016200.1 PE=4 SV=1;tr|G4V5F6|G4V5F6_SCHMA Putative flotillin-1 OS=Schistosoma mansoni GN=	9	46.559	-0.775344	17.9366	18.9251	18.8284	18.5633	19.7235	19.6985	18.594	19.3387
G4V5F8	tr|G4V5F8|G4V5F8_SCHMA Putative cyclin k OS=Schistosoma mansoni GN=Smp_130980 PE=3 SV=1	2	44.285	0.654397	17.2802	16.3926	16.6879	16.7869	16.1325			16.1325
G4V5F9	tr|G4V5F9|G4V5F9_SCHMA Putative cyclins OS=Schistosoma mansoni GN=Smp_130970 PE=3 SV=1	6	59.121	F only	15.4891	14.7494	17.1232	15.7872				N/A
G4V5G0	tr|G4V5G0|G4V5G0_SCHMA Uncharacterized protein OS=Schistosoma mansoni GN=Smp_130960 PE=4 SV=1	12	90.783	-3.76938	13.4635	14.7501		14.1068	17.4659	18.3066	17.8562	17.8762
G4V5G6;G4V5G5	tr|G4V5G6|G4V5G6_SCHMA Putative transcription factor IWS1 OS=Schistosoma mansoni GN=Smp_008500.2 PE=4 SV=1;tr|G4V5G5|G4V5G5_SCHMA Putative transcription factor IWS1 OS=Schistosoma mansoni GN=Smp_008500.1 PE=4 SV=1	4	71.321	-0.314221	17.1487	16.314	18.1271	17.1966	17.9727	18.1701	16.3897	17.5108
G4V5G7	tr|G4V5G7|G4V5G7_SCHMA Glycogenin-related OS=Schistosoma mansoni GN=Smp_008490 PE=4 SV=1	12	36.51	-0.988663	20.4011	21.2072	20.2984	20.6356	21.786	21.3787	21.7081	21.6242
G4V5G8	tr|G4V5G8|G4V5G8_SCHMA Uncharacterized protein OS=Schistosoma mansoni GN=Smp_126720 PE=4 SV=1	3	55.879	0.073356	17.8031	16.5979	17.6091	17.3367	17.7143	17.0874	16.9882	17.2633
G4V5G9;G4V5H0	tr|G4V5G9|G4V5G9_SCHMA Putative erythroblast macrophage protein emp OS=Schistosoma mansoni GN=Smp_008470.1 PE=4 SV=1;tr|G4V5H0|G4V5H0_SCHMA Putative erythroblast macrophage protein emp OS=Schistosoma mansoni GN=Smp_008470.2 PE=4 SV=1	2	45.167	-0.138876	16.6696	16.3134		16.4915	16.3549	17.3673	16.1689	16.6304
G4V5H1	tr|G4V5H1|G4V5H1_SCHMA Uncharacterized protein OS=Schistosoma mansoni GN=Smp_008430 PE=4 SV=1	3	26.23	1.16426	19.4794	18.8882	18.5508	18.9728	17.5708	17.8245	18.0302	17.8085
G4V5I0	tr|G4V5I0|G4V5I0_SCHMA Uncharacterized protein OS=Schistosoma mansoni GN=Smp_152740 PE=4 SV=1	3	85.172	2.03751	15.9359	16.4879	17.4803	16.6347	15.0788		14.1156	14.5972
G4V5I6	tr|G4V5I6|G4V5I6_SCHMA Putative cyclin OS=Schistosoma mansoni GN=Smp_152760 PE=4 SV=1	11	35.532	0.787063	21.6021	21.6972	21.5484	21.6159	20.764	21.2116	20.5109	20.8288
G4V5I7	tr|G4V5I7|G4V5I7_SCHMA Uncharacterized protein OS=Schistosoma mansoni GN=Smp_056990 PE=4 SV=1	2	43.221	-1.78271		15.3614	14.9143	15.1379	17.5767	16.6339	16.5511	16.9206
G4V5J1	tr|G4V5J1|G4V5J1_SCHMA Uncharacterized protein OS=Schistosoma mansoni GN=Smp_057060 PE=4 SV=1	9	52.713	-1.98632			17.1282	17.1282	19.3373	18.7354	19.2707	19.1145
G4V5J2	tr|G4V5J2|G4V5J2_SCHMA Ras-related GTP binding rag A,B/gtr1 OS=Schistosoma mansoni GN=Smp_152790 PE=4 SV=1	3	35.384	-1.52187	14.1779	16.2936	15.6284	15.3667	16.8091	17.024	16.8324	16.8885
G4V5J3;G4V5J4	tr|G4V5J3|G4V5J3_SCHMA Putative chromosome region maintenance protein 5/exportin OS=Schistosoma mansoni GN=Smp_152800.1 PE=4 SV=1;tr|G4V5J4|G4V5J4_SCHMA Putative chromosome region maintenance protein 5/exportin OS=Schistosoma mansoni GN=Smp_152800.2 PE=4 S	13	145.89	-0.828807	14.1447	14.4922		14.3184	13.1379	14.3181	17.9856	15.1472
G4V5K8	tr|G4V5K8|G4V5K8_SCHMA Uncharacterized protein OS=Schistosoma mansoni GN=Smp_152860 PE=4 SV=1	9	91.487	-0.697468	18.1482	18.4115	18.2106	18.2568	18.7979	19.0031	19.0618	18.9543
G4V5L4	tr|G4V5L4|G4V5L4_SCHMA Putative chaperonin containing t-complex protein 1, zeta subunit, tcpz OS=Schistosoma mansoni GN=Smp_004990 PE=3 SV=1	25	59.885	0.158456	23.9233	24.1471	24.1916	24.0873	24.0384	23.9889	23.7593	23.9289
G4V5L5	tr|G4V5L5|G4V5L5_SCHMA Uncharacterized protein OS=Schistosoma mansoni GN=Smp_005000 PE=4 SV=1	3	28.081	0.544259	19.6199	19.6566	18.7174	19.3313	19.1991	19.3861	17.7759	18.787
G4V5L6	tr|G4V5L6|G4V5L6_SCHMA Putative 50s ribosomal protein L20 OS=Schistosoma mansoni GN=Smp_004980 PE=4 SV=1	4	18.804	1.16702	19.4622	18.9181	18.2146	18.8649	18.1041	16.4813	18.5084	17.6979
G4V5M0;G4V5L9	tr|G4V5M0|G4V5M0_SCHMA Putative chromosome region maintenance protein 1/exportin OS=Schistosoma mansoni GN=Smp_124820.1 PE=4 SV=1;tr|G4V5L9|G4V5L9_SCHMA Putative chromosome region maintenance protein 1/exportin OS=Schistosoma mansoni GN=Smp_124820.2 PE=4 S	19	94.869	-0.26544	20.7126	20.7906	20.9907	20.8313	20.9123	21.2632	21.1147	21.0968
G4V5M1	tr|G4V5M1|G4V5M1_SCHMA Putative 60s ribosomal protein L35 OS=Schistosoma mansoni GN=Smp_004940 PE=3 SV=1	1	14.882	F only	18.6763	17.7023	17.8583	18.079				N/A
G4V5M2	tr|G4V5M2|G4V5M2_SCHMA Uncharacterized protein OS=Schistosoma mansoni GN=Smp_005060.1 PE=4 SV=1	4	17.028	-0.969893	22.0964	22.116	22.1951	22.1358	23.0703	23.3831	22.8638	23.1057
G4V5M6;G4V5M5;G4V5M7	tr|G4V5M6|G4V5M6_SCHMA Putative nucleolar protein nol1/nop2 OS=Schistosoma mansoni GN=Smp_005080.3 PE=3 SV=1;tr|G4V5M5|G4V5M5_SCHMA Putative nucleolar protein nol1/nop2 OS=Schistosoma mansoni GN=Smp_005080.2 PE=3 SV=1;tr|G4V5M7|G4V5M7_SCHMA Putative nucleo	12	54.225	-1.17877	16.3676	15.7467	17.3987	16.5043			17.6831	17.6831
G4V5P4;G4V5P5	tr|G4V5P4|G4V5P4_SCHMA Putative 60S ribosomal protein L23 OS=Schistosoma mansoni GN=Smp_007900.2 PE=3 SV=1;tr|G4V5P5|G4V5P5_SCHMA Putative 60S ribosomal protein L23 OS=Schistosoma mansoni GN=Smp_007900.1 PE=3 SV=1	5	12.537	0.967272	24.0696	24.0082	23.8692	23.9823	23.027	22.7832	23.2349	23.015
G4V5Q1	tr|G4V5Q1|G4V5Q1_SCHMA Putative nadh-plastoquinone oxidoreductase OS=Schistosoma mansoni GN=Smp_092490.1 PE=3 SV=1	4	23.406	0.160381	20.7585	20.5381	20.7612	20.6859	20.7125	20.5147	20.3495	20.5255
G4V5Q4	tr|G4V5Q4|G4V5Q4_SCHMA Eukaryotic translation initiation factor 3 subunit A OS=Schistosoma mansoni GN=Smp_001170 PE=3 SV=1	39	121.72	1.32182	21.263	21.0414	21.1487	21.151	19.524	19.4345	20.5291	19.8292
G4V5Q8	tr|G4V5Q8|G4V5Q8_SCHMA Uncharacterized protein OS=Schistosoma mansoni GN=Smp_001120 PE=4 SV=1	5	22.449	1.26251	20.0284	20.1051	20.0556	20.063	18.9319	18.8567	18.613	18.8005
G4V5R0	tr|G4V5R0|G4V5R0_SCHMA Uncharacterized protein (Fragment) OS=Schistosoma mansoni GN=Smp_001095 PE=4 SV=1	3	69.781	-2.71528	14.2666	13.2714		13.769	16.4716	16.9129	16.0684	16.4843
G4V5R1	tr|G4V5R1|G4V5R1_SCHMA Putative nuclear pore complex protein OS=Schistosoma mansoni GN=Smp_001090 PE=4 SV=1	6	111.3	-0.472439	16.2919	16.9339	15.2693	16.165	16.4428	16.7761	16.6935	16.6375
G4V5R8	tr|G4V5R8|G4V5R8_SCHMA Kinesin heavy chain OS=Schistosoma mansoni GN=Smp_001040 PE=3 SV=1	37	115.09	-0.227637	20.9129	20.8461	20.8233	20.8608	21.0473	21.3246	20.8934	21.0884
G4V5R9	tr|G4V5R9|G4V5R9_SCHMA 5-amp-activated protein kinase gamma-2 non-catalytic subunit transcript variant 2 OS=Schistosoma mansoni GN=Smp_001030 PE=4 SV=1	5	32.155	-0.727591	17.3016	17.7785	17.9599	17.68	18.0587	18.8598	18.3042	18.4076
G4V5S1	tr|G4V5S1|G4V5S1_SCHMA Uncharacterized protein Smp_200240 OS=Schistosoma mansoni GN=Smp_200240 PE=4 SV=1	5	19.456	-0.641939	21.0691	22.8308	21.9644	21.9548	23.2707	21.8579	22.6616	22.5967
G4V5T0	tr|G4V5T0|G4V5T0_SCHMA Mitotic phosphoprotein 44 OS=Schistosoma mansoni GN=Smp_000890 PE=4 SV=1	6	28.77	0.169733	20.428	20.2403	20.0136	20.2273	19.9936	20.1196	20.0595	20.0576
G4V5T5	tr|G4V5T5|G4V5T5_SCHMA Putative ef-hand domain (C-terminal) containing protein OS=Schistosoma mansoni GN=Smp_171010 PE=4 SV=1	2	78.649	M only				N/A	15.7703	16.5044	14.7177	15.6641
G4V5T8	tr|G4V5T8|G4V5T8_SCHMA Mannose-6-phosphate isomerase OS=Schistosoma mansoni GN=Smp_089590 PE=3 SV=1	13	53.364	-0.807443	20.102	20.1467	20.2045	20.1511	20.9776	21.0042	20.8938	20.9585
G4V5U1	tr|G4V5U1|G4V5U1_SCHMA Putative polyglutamine binding protein OS=Schistosoma mansoni GN=Smp_089630 PE=4 SV=1	6	55.578	1.85826	18.7642	18.8404	18.625	18.7432	15.8142	17.4632	17.3775	16.885
G4V5U3;G4V5U2	tr|G4V5U3|G4V5U3_SCHMA Succinate dehydrogenase [ubiquinone] iron-sulfur subunit, mitochondrial OS=Schistosoma mansoni GN=Smp_089640.2 PE=3 SV=1;tr|G4V5U2|G4V5U2_SCHMA Succinate dehydrogenase [ubiquinone] iron-sulfur subunit, mitochondrial OS=Schistosoma ma	13	32.268	0.272393	23.1352	23.0736	23.0247	23.0778	23.0189	22.8327	22.5648	22.8055
G4V5U8;E7BBC0	tr|G4V5U8|G4V5U8_SCHMA Integrin beta OS=Schistosoma mansoni GN=Smp_089700 PE=3 SV=1;tr|E7BBC0|E7BBC0_SCHMA Integrin beta OS=Schistosoma mansoni GN=beta-Int1 PE=2 SV=1	10	90.746	-0.890186	17.664	17.743	17.9187	17.7752	18.6053	18.5846	18.8063	18.6654
G4V5V7	tr|G4V5V7|G4V5V7_SCHMA Putative tubulin-specific chaperone B (Tubulin folding cofactor B) OS=Schistosoma mansoni GN=Smp_055400 PE=4 SV=1	9	27.62	0.728303	21.8363	21.3195	21.1459	21.4339	20.6948	20.9798	20.4423	20.7056
G4V5V8	tr|G4V5V8|G4V5V8_SCHMA Uncharacterized protein OS=Schistosoma mansoni GN=Smp_151650 PE=4 SV=1	2	18.068	1.09596	19.4536	19.2313	19.4267	19.3705	17.7643	18.7567	18.3027	18.2746
G4V5W4	tr|G4V5W4|G4V5W4_SCHMA Uncharacterized protein OS=Schistosoma mansoni GN=Smp_055450 PE=4 SV=1	2	18.377	-0.448914	18.1356	19.311	18.7437	18.7301	19.4194	19.2727	18.845	19.179
G4V5Y0	tr|G4V5Y0|G4V5Y0_SCHMA Isocitrate dehydrogenase [NAD] subunit, mitochondrial OS=Schistosoma mansoni GN=Smp_056200 PE=3 SV=1	8	43.546	-0.801387	20.1075	20.0419	19.4459	19.8651	20.7064	20.569	20.7241	20.6665
G4V5Y8	tr|G4V5Y8|G4V5Y8_SCHMA Uncharacterized protein OS=Schistosoma mansoni GN=Smp_056280 PE=4 SV=1	16	74.022	-7.04958	14.8339	14.8761	14.3829	14.6976	21.9894	21.2939	21.9583	21.7472
G4V5Z4	tr|G4V5Z4|G4V5Z4_SCHMA Uncharacterized protein OS=Schistosoma mansoni GN=Smp_124860 PE=4 SV=1	2	40.445	M only				N/A	15.7537	15.9487	15.3138	15.6721
G4V5Z8	tr|G4V5Z8|G4V5Z8_SCHMA Uncharacterized protein OS=Schistosoma mansoni GN=Smp_005180 PE=4 SV=1	12	57.872	-0.516023	19.7909	20.117	20.7942	20.234	20.4659	20.6696	21.1147	20.7501
G4V605	tr|G4V605|G4V605_SCHMA Putative 40s ribosomal protein S5 OS=Schistosoma mansoni GN=Smp_093440 PE=3 SV=1	10	21.755	1.02163	22.7947	22.7742	22.4942	22.6877	21.3211	20.2285	23.4486	21.6661
G4V609;G4V611;G4V610	tr|G4V609|G4V609_SCHMA Putative ef hand containing protein OS=Schistosoma mansoni GN=Smp_005230.1 PE=4 SV=1;tr|G4V611|G4V611_SCHMA EF hand containing protein OS=Schistosoma mansoni GN=Smp_005230.2 PE=4 SV=1;tr|G4V610|G4V610_SCHMA EF hand containing protein	12	34.167	-2.20167	20.3821	20.1617	20.4102	20.318	22.8585	22.766	21.9344	22.5197
G4V613	tr|G4V613|G4V613_SCHMA Putative endoplasmic reticulum oxidoreductin 1 (ERO1) OS=Schistosoma mansoni GN=Smp_124920 PE=4 SV=1	15	47.492	-1.15511	20.3615	20.1285	20.2098	20.2333	21.6432	21.316	21.2059	21.3884
G4V615;G4V614;G4V616	tr|G4V615|G4V615_SCHMA Uncharacterized protein OS=Schistosoma mansoni GN=Smp_028170.2 PE=4 SV=1;tr|G4V614|G4V614_SCHMA Uncharacterized protein OS=Schistosoma mansoni GN=Smp_028170.3 PE=4 SV=1;tr|G4V616|G4V616_SCHMA Uncharacterized protein OS=Schistosoma ma	1	48.755	M only				N/A	16.9837	17.4876	17.215	17.2288
G4V622	tr|G4V622|G4V622_SCHMA Optic atrophy 1-like protein, opa1 OS=Schistosoma mansoni GN=Smp_028120 PE=3 SV=1	12	101.18	-0.283502	17.7781	18.124	17.9338	17.9453	18.4812	18.0827	18.1225	18.2288
G4V624;G4V625	tr|G4V624|G4V624_SCHMA Putative ubiquitin-conjugating enzyme E2 G OS=Schistosoma mansoni GN=Smp_028100.1 PE=3 SV=1;tr|G4V625|G4V625_SCHMA Putative ubiquitin-conjugating enzyme E2 G OS=Schistosoma mansoni GN=Smp_028100.2 PE=3 SV=1	4	19.28	0.942671	21.3523	21.1775	20.6788	21.0695	20.0409	19.7675	20.5722	20.1269
G4V627	tr|G4V627|G4V627_SCHMA Slbp-P1-related OS=Schistosoma mansoni GN=Smp_137390 PE=4 SV=1	3	41.621	-0.784156	17.9536	16.8113	17.6718	17.4789	18.0659	17.5765	19.1467	18.263
G4V630;G4V629	tr|G4V630|G4V630_SCHMA Bicaudal D-like protein OS=Schistosoma mansoni GN=Smp_028070.2 PE=4 SV=1;tr|G4V629|G4V629_SCHMA Bicaudal D-like protein OS=Schistosoma mansoni GN=Smp_028070.1 PE=4 SV=1	9	104.06	-2.08478	16.0672	16.3002	15.5118	15.9598	17.7592	17.9985	18.3759	18.0445
G4V642	tr|G4V642|G4V642_SCHMA Nuclear pore membrane glycoprotein gp210-related OS=Schistosoma mansoni GN=Smp_142550 PE=4 SV=1	44	244.33	-0.968325	18.0295	18.4167	19.6109	18.6857	19.5587	19.8298	19.5737	19.654
G4V653	tr|G4V653|G4V653_SCHMA Putative talin 2 OS=Schistosoma mansoni GN=Smp_142630 PE=4 SV=1	27	235.41	-1.2329	16.7493	17.1675	17.2674	17.0614	18.5438	17.9045	18.4346	18.2943
G4V654	tr|G4V654|G4V654_SCHMA Putative talin OS=Schistosoma mansoni GN=Smp_037860 PE=4 SV=1	10	60.534	-1.72935	15.6971	15.7009	15.9336	15.7772	17.9147	16.8592	17.7457	17.5066
G4V655	tr|G4V655|G4V655_SCHMA NAD(P)H-hydrate epimerase OS=Schistosoma mansoni GN=Smp_142640 PE=3 SV=1	3	27.042	1.16078	20.0025	19.5992	18.7862	19.4626	17.9436	18.5349	18.4271	18.3019
G4V656;G4V6D0	tr|G4V656|G4V656_SCHMA Uncharacterized protein OS=Schistosoma mansoni GN=Smp_142650.2 PE=4 SV=1;tr|G4V6D0|G4V6D0_SCHMA Uncharacterized protein OS=Schistosoma mansoni GN=Smp_142650.3 PE=4 SV=1	6	133.72	2.64658	17.5453	16.9674	16.8915	17.1347	15.453	13.2776	14.7339	14.4882
G4V664;G4V663	tr|G4V664|G4V664_SCHMA Similar to TatD DNAse domain containing 1 OS=Schistosoma mansoni GN=Smp_000810.1 PE=4 SV=1;tr|G4V663|G4V663_SCHMA Tatd DNAse-related OS=Schistosoma mansoni GN=Smp_000810.2 PE=4 SV=1	9	34.222	-0.225069	18.2915	19.2543	18.8596	18.8018	19.2433	19.2561	18.5813	19.0269
G4V669	tr|G4V669|G4V669_SCHMA Family M13 non-peptidase homologue (M13 family) OS=Schistosoma mansoni GN=Smp_000755 PE=4 SV=1	9	92.819	1.85688	15.419	18.6658	17.145	17.0766	14.7243		15.7151	15.2197
G4V672	tr|G4V672|G4V672_SCHMA Putative f1 OS=Schistosoma mansoni GN=Smp_194170 PE=4 SV=1	5	13.523	0.405964	21.7019	21.5273	21.5738	21.601	21.1798	20.9578	21.4476	21.1951
G4V678	tr|G4V678|G4V678_SCHMA Protein kinase OS=Schistosoma mansoni GN=Smp_176440 PE=4 SV=1	9	92.392	-0.737065	17.3915	17.6324	17.2775	17.4338	18.1657	18.0931	18.2537	18.1708
G4V683	tr|G4V683|G4V683_SCHMA Serine/threonine kinase OS=Schistosoma mansoni GN=Smp_098840 PE=3 SV=1	3	49.25	-0.965122	14.6346	15.3223	15.5479	15.1683	16.7039	15.863	15.8333	16.1334
G4V686	tr|G4V686|G4V686_SCHMA Putative propionyl-CoA carboxylase beta chain,mitochondrial OS=Schistosoma mansoni GN=Smp_163230 PE=4 SV=1	10	60.271	-1.97145	16.4669	16.8518	17.9915	17.1034	18.866	18.7752	19.5833	19.0748
G4V697	tr|G4V697|G4V697_SCHMA Putative collagen alpha chain OS=Schistosoma mansoni GN=Smp_159600 PE=3 SV=1	6	159.24	-1.76538	15.604	15.112	16.2565	15.6575	18.2604	17.3217	16.6867	17.4229
G4V698	tr|G4V698|G4V698_SCHMA Putative malate dehydrogenase OS=Schistosoma mansoni GN=Smp_129610 PE=4 SV=1	14	41.758	0.333523	21.254	21.0787	21.4726	21.2685	20.8229	21.4368	20.5451	20.9349
G4V6A0	tr|G4V6A0|G4V6A0_SCHMA Uncharacterized protein OS=Schistosoma mansoni GN=Smp_129590 PE=4 SV=1	4	184.81	0.0545827	12.541	15.1555	14.8144	14.1703			14.1157	14.1157
G4V6A2	tr|G4V6A2|G4V6A2_SCHMA Uncharacterized protein Smp_201090 OS=Schistosoma mansoni GN=Smp_201090 PE=4 SV=1	4	57.023	-4.36923	13.9106	14.9439		14.4272	18.8844	19.1637	18.3413	18.7965
G4V6A4	tr|G4V6A4|G4V6A4_SCHMA Uncharacterized protein OS=Schistosoma mansoni GN=Smp_129560 PE=4 SV=1	7	92.334	-1.64249	15.3813	14.6446	16.2539	15.4266	16.142		17.9963	17.0691
G4V6A5	tr|G4V6A5|G4V6A5_SCHMA Uncharacterized protein OS=Schistosoma mansoni GN=Smp_013690 PE=4 SV=1	13	48.04	-0.838099	20.4529	20.6605	20.3539	20.4891	21.3534	21.6369	20.9913	21.3272
G4V6A6	tr|G4V6A6|G4V6A6_SCHMA Uncharacterized protein OS=Schistosoma mansoni GN=Smp_209010 PE=4 SV=1	4	45.251	-0.965345		14.6238	14.4528	14.5383	16.3146	14.0702	16.1262	15.5036
G4V6B1	tr|G4V6B1|G4V6B1_SCHMA Putative mitochondrial 2-oxoglutarate/malate carrier protein OS=Schistosoma mansoni GN=Smp_004080 PE=3 SV=1	10	34.372	-2.27107	17.4977	16.2921	18.8341	17.5413	19.5907	18.6753	21.171	19.8124
G4V6B2	tr|G4V6B2|G4V6B2_SCHMA Carbonic anhydrase OS=Schistosoma mansoni GN=Smp_004070 PE=3 SV=1	1	27.699	M only				N/A	16.3086	15.9944	16.5874	16.2968
G4V6B3	tr|G4V6B3|G4V6B3_SCHMA Putative cell division cycle 20 (Cdc20) (Fizzy) OS=Schistosoma mansoni GN=Smp_004060 PE=4 SV=1	7	52.103	2.43425	18.7004	18.7012	18.7225	18.7081	14.9216	16.4019	17.4979	16.2738
G4V6B6	tr|G4V6B6|G4V6B6_SCHMA Putative chromosome transmission fidelity factor OS=Schistosoma mansoni GN=Smp_004020 PE=4 SV=1	15	154.55	0.520092	17.1344	17.1528	17.0744	17.1205	17.0713	15.8981	16.8319	16.6004
G4V6B7	tr|G4V6B7|G4V6B7_SCHMA Putative 50s ribosomal protein L4 OS=Schistosoma mansoni GN=Smp_124320 PE=4 SV=1	6	46.331	0.675642	18.385	18.1683	19.0957	18.5496	18.2028	17.7599	17.6594	17.874
G4V6B9;P48501	tr|G4V6B9|G4V6B9_SCHMA Triosephosphate isomerase OS=Schistosoma mansoni GN=Smp_003990 PE=1 SV=1;sp|P48501|TPIS_SCHMA Triosephosphate isomerase OS=Schistosoma mansoni GN=TPI PE=1 SV=1	17	28.094	-1.12568	24.1139	24.4497	23.9752	24.1796	25.3325	25.3768	25.2066	25.3053
G4V6C0	tr|G4V6C0|G4V6C0_SCHMA Family C2 unassigned peptidase (C02 family) OS=Schistosoma mansoni GN=Smp_003980 PE=3 SV=1	9	81.782	-0.852215	18.3291	17.5909	17.8887	17.9362	18.9878	18.4004	18.9771	18.7885
G4V6C2	tr|G4V6C2|G4V6C2_SCHMA Putative elongation factor-1 beta,delta OS=Schistosoma mansoni GN=Smp_003970 PE=4 SV=1	11	26.66	1.18365	24.4592	24.2836	24.0557	24.2662	23.1065	23.1415	22.9995	23.0825
G4V6C4	tr|G4V6C4|G4V6C4_SCHMA Putative 5-AMP-activated protein kinase, beta subunit OS=Schistosoma mansoni GN=Smp_124310 PE=4 SV=1	2	22.719	-0.257943	17.9892	16.08	17.8904	17.3198	17.5955	17.4125	17.7254	17.5778
G4V6C5	tr|G4V6C5|G4V6C5_SCHMA Lamin B receptor (ERG24) OS=Schistosoma mansoni GN=Smp_124300 PE=4 SV=1	8	69.119	-4.15425			15.8602	15.8602	19.5377	18.9616	21.544	20.0144
G4V6C7	tr|G4V6C7|G4V6C7_SCHMA Uncharacterized protein OS=Schistosoma mansoni GN=Smp_003940 PE=4 SV=1	2	36.176	0.768258	16.4827	16.6548	16.5417	16.5597	15.7941	16.4011	15.1792	15.7915
G4V6D5	tr|G4V6D5|G4V6D5_SCHMA Succinate dehydrogenase [ubiquinone] cytochrome b small subunit OS=Schistosoma mansoni GN=Smp_037910 PE=3 SV=1	2	17.285	0.524956	19.3505	20.2251	20.4781	20.0179	19.5226	18.75	20.2062	19.4929
G4V6D6	tr|G4V6D6|G4V6D6_SCHMA Uncharacterized protein OS=Schistosoma mansoni GN=Smp_084620 PE=4 SV=1	5	13.112	-0.0735193	23.1658	23.3744	22.8914	23.1439	23.2113	23.3253	23.1156	23.2174
G4V6D7	tr|G4V6D7|G4V6D7_SCHMA Fas-associated factor-related OS=Schistosoma mansoni GN=Smp_084610 PE=4 SV=1	7	58.647	-0.150237	18.2063	18.2979	17.6091	18.0378	18.0315	18.5052	18.0273	18.188
G4V6E1;G4V6E2;G4V6E3	tr|G4V6E1|G4V6E1_SCHMA Splicing factor 3b, subunit 1-related OS=Schistosoma mansoni GN=Smp_141630.1 PE=4 SV=1;tr|G4V6E2|G4V6E2_SCHMA Splicing factor 3b, subunit 1-related OS=Schistosoma mansoni GN=Smp_141630.2 PE=4 SV=1;tr|G4V6E3|G4V6E3_SCHMA Splicing fact	20	122.15	0.53041	18.5336	18.5781	18.8905	18.6674	17.4833	17.6851	19.2426	18.137
G4V6E9;C1M1H8;G4VL73	tr|G4V6E9|G4V6E9_SCHMA Histone H2B OS=Schistosoma mansoni GN=Smp_036220 PE=3 SV=1;tr|C1M1H8|C1M1H8_SCHMA Histone H2B OS=Schistosoma mansoni GN=Smp_108390 PE=3 SV=1;tr|G4VL73|G4VL73_SCHMA Putative histone H2B OS=Schistosoma mansoni GN=Smp_077790 PE=3 SV=1	8	13.577	-1.40576	25.2678	24.9753	25.2265	25.1565	26.2101	25.6067	27.87	26.5623
G4V6F4;G4V6F5;G4V6F7;G4V6F6	tr|G4V6F4|G4V6F4_SCHMA Putative arginine/serine-rich splicing factor OS=Schistosoma mansoni GN=Smp_036270.10 PE=4 SV=1;tr|G4V6F5|G4V6F5_SCHMA Putative arginine/serine-rich splicing factor OS=Schistosoma mansoni GN=Smp_036270.2 PE=4 SV=1;tr|G4V6F7|G4V6F7_SC	6	41.896	0.785625	22.9322	22.4639	22.4701	22.6221	22.0793	21.5391	21.8909	21.8364
G4V6G0	tr|G4V6G0|G4V6G0_SCHMA Uncharacterized protein OS=Schistosoma mansoni GN=Smp_141710 PE=4 SV=1	13	168.14	0.00445163	15.0735	15.7885	16.735	15.8657	15.6033	13.9752	18.0051	15.8612
G4V6G9	tr|G4V6G9|G4V6G9_SCHMA Putative titin OS=Schistosoma mansoni GN=Smp_105020 PE=4 SV=1	9	83.179	1.72012	19.585	19.8519	19.4425	19.6265	18.0776	16.6513	18.9902	17.9064
G4V6H8	tr|G4V6H8|G4V6H8_SCHMA Uncharacterized protein OS=Schistosoma mansoni GN=Smp_060620 PE=4 SV=1	4	20.654	M only				N/A	18.6587	19.513	18.2339	18.8019
G4V6I7	tr|G4V6I7|G4V6I7_SCHMA SWI/SNF-related OS=Schistosoma mansoni GN=Smp_154640 PE=4 SV=1	4	111.08	-0.146739		15.5476	15.9698	15.7587	15.5031	16.9148	15.2985	15.9055
G4V6J3	tr|G4V6J3|G4V6J3_SCHMA Coatomer subunit gamma OS=Schistosoma mansoni GN=Smp_092770 PE=3 SV=1	33	101.22	0.132586	19.7295	20.1908	19.8801	19.9334	19.4719	19.2164	20.7142	19.8009
G4V6J4	tr|G4V6J4|G4V6J4_SCHMA ATPase ASNA1 homolog OS=Schistosoma mansoni GN=Smp_210810 PE=3 SV=1	7	42.869	-0.630163	19.8649	20.365	20.5393	20.2564	20.9006	21.5739	20.1852	20.8866
G4V6J5	tr|G4V6J5|G4V6J5_SCHMA G protein-coupled receptor kinase OS=Schistosoma mansoni GN=Smp_210820 PE=3 SV=1	7	86.485	-2.06863	13.8527	15.6173		14.735	16.053	17.2514	17.1065	16.8036
G4V6K0	tr|G4V6K0|G4V6K0_SCHMA Putative DNA repair protein RAD51 OS=Schistosoma mansoni GN=Smp_124230 PE=3 SV=1	9	36.704	-0.742365	20.1973	20.2059	19.8509	20.0847	20.6286	21.631	20.2217	20.8271
G4V6K1	tr|G4V6K1|G4V6K1_SCHMA Uncharacterized protein OS=Schistosoma mansoni GN=Smp_124220 PE=4 SV=1	16	219	0.385766	18.583	18.7177	19.6795	18.9934	17.2602	19.2949	19.2678	18.6076
G4V6K8	tr|G4V6K8|G4V6K8_SCHMA Putative histone h1/h5 OS=Schistosoma mansoni GN=Smp_003770 PE=3 SV=1	4	20.446	-1.27373	22.3718	21.6347	22.3695	22.1253	23.4199	21.7501	25.0272	23.3991
G4V6L4	tr|G4V6L4|G4V6L4_SCHMA Uncharacterized protein OS=Schistosoma mansoni GN=Smp_003700 PE=4 SV=1	4	19.144	1.29096	19.0759	18.5221	19.5982	19.0654	17.7757	17.964	17.5837	17.7744
G4V6L7	tr|G4V6L7|G4V6L7_SCHMA Putative dead box ATP-dependent RNA helicase OS=Schistosoma mansoni GN=Smp_003660 PE=4 SV=1	21	49.088	-0.0561249	22.6628	22.9322	23.3248	22.9733	23.0611	22.9375	23.0896	23.0294
G4V6L9	tr|G4V6L9|G4V6L9_SCHMA Putative smad nuclear interacting protein OS=Schistosoma mansoni GN=Smp_124110 PE=4 SV=1	2	84.665	1.27157	15.9941	15.2436	13.7117	14.9831			13.7115	13.7115
G4V6M0	tr|G4V6M0|G4V6M0_SCHMA Putative splicing factor 3a OS=Schistosoma mansoni GN=Smp_003630 PE=4 SV=1	15	59.673	0.995657	20.5298	20.2922	20.43	20.4173	19.6531	19.5455	19.0664	19.4217
G4V6M9	tr|G4V6M9|G4V6M9_SCHMA Venom allergen-like (VAL) 16 protein OS=Schistosoma mansoni GN=Smp_124070 PE=3 SV=1	7	15.873	4.14141	23.8524	23.5754	23.278	23.5686	19.569	19.5071	19.2054	19.4272
G4V6P1	tr|G4V6P1|G4V6P1_SCHMA Uncharacterized protein Smp_200330 OS=Schistosoma mansoni GN=Smp_200330 PE=4 SV=1	12	28.21	0.711671	21.3719	21.1093	21.1476	21.2096	20.2965	20.6359	20.5613	20.4979
G4V6P2	tr|G4V6P2|G4V6P2_SCHMA Putative threonyl-tRNA synthetase OS=Schistosoma mansoni GN=Smp_123990 PE=4 SV=1	11	46.402	0.507808	22.4191	22.3558	22.2192	22.3314	21.7364	22.0183	21.7159	21.8235
G4V6P4	tr|G4V6P4|G4V6P4_SCHMA Putative 60s ribosomal protein L23a OS=Schistosoma mansoni GN=Smp_003410 PE=3 SV=1	8	22.008	1.16872	25.4002	24.7062	24.7981	24.9682	23.8355	22.8132	24.7497	23.7995
G4V6P6	tr|G4V6P6|G4V6P6_SCHMA Serine/threonine kinase OS=Schistosoma mansoni GN=Smp_068060.1 PE=4 SV=1	5	114.55	-1.12758	17.1399	16.9472	17.2264	17.1045	19.0563	18.1781	17.4618	18.2321
G4V6P7	tr|G4V6P7|G4V6P7_SCHMA Uncharacterized protein OS=Schistosoma mansoni GN=Smp_068070 PE=4 SV=1	16	68.707	0.549772	19.8066	19.7873	19.6722	19.7553	18.8752	19.6252	19.1163	19.2056
G4V6P8	tr|G4V6P8|G4V6P8_SCHMA Uncharacterized protein OS=Schistosoma mansoni GN=Smp_068080 PE=4 SV=1	2	16.104	0.909191	18.9012	17.7655	18.0445	18.237	17.0249	17.4592	17.4994	17.3279
G4V6P9	tr|G4V6P9|G4V6P9_SCHMA Putative zinc phosphodiesterase OS=Schistosoma mansoni GN=Smp_068090 PE=3 SV=1	7	46.552	0.221549	20.0341	20.0662	19.7992	19.9665	19.9322	19.9938	19.3089	19.745
G4V6Q1	tr|G4V6Q1|G4V6Q1_SCHMA Putative microfibril-associated protein OS=Schistosoma mansoni GN=Smp_068100 PE=4 SV=1	3	51.322	0.871071	18.273	17.9708	18.4504	18.2314	17.1604	17.5141	17.4065	17.3603
G4V6R4	tr|G4V6R4|G4V6R4_SCHMA Putative rab9 and OS=Schistosoma mansoni GN=Smp_067140 PE=4 SV=1	10	23.309	-1.90642	19.1772	19.9364	20.4351	19.8495	21.8708	22.0717	21.3254	21.756
G4V6S0	tr|G4V6S0|G4V6S0_SCHMA Eukaryotic translation initiation factor 3 subunit H OS=Schistosoma mansoni GN=Smp_210570 PE=3 SV=1	10	38.956	1.50753	22.4545	22.3468	22.2592	22.3535	21.0218	21.0864	20.4298	20.846
G4V6S8	tr|G4V6S8|G4V6S8_SCHMA Uncharacterized protein OS=Schistosoma mansoni GN=Smp_196840 PE=4 SV=1	1	152.83	0.482258	16.0961	14.5415	14.6444	15.094	15.1901	14.3592	14.2859	14.6117
G4V6T0;G4V6S9	tr|G4V6T0|G4V6T0_SCHMA Putative negative cofactor 2 transcriptional co-repressor (Nc2) (Fragment) OS=Schistosoma mansoni GN=Smp_167570.2 PE=4 SV=1;tr|G4V6S9|G4V6S9_SCHMA Putative negative cofactor 2 transcriptional co-repressor (Nc2) (Fragment) OS=Schistos	2	30.784	-0.046964	17.7967	16.7302	16.5108	17.0126	16.2829		17.8361	17.0595
G4V6T2	tr|G4V6T2|G4V6T2_SCHMA Putative cystathionine beta-lyase OS=Schistosoma mansoni GN=Smp_083650 PE=3 SV=1	8	46.42	0.697694	20.6505	20.7443	20.8252	20.74	19.9226	20.0051	20.1992	20.0423
G4V6T3	tr|G4V6T3|G4V6T3_SCHMA Uncharacterized protein OS=Schistosoma mansoni GN=Smp_083680 PE=4 SV=1	2	35.727	1.67913	18.6406	18.0762	18.1247	18.2805			16.6014	16.6014
G4V6T6	tr|G4V6T6|G4V6T6_SCHMA Putative mitochondrial phosphate carrier protein OS=Schistosoma mansoni GN=Smp_083720 PE=3 SV=1	8	34.899	-1.50376	18.9526	19.2713	21.3703	19.8647	21.7038	20.2481	22.1536	21.3685
G4V6T7;G4V6T8	tr|G4V6T7|G4V6T7_SCHMA Uncharacterized protein OS=Schistosoma mansoni GN=Smp_083730.1 PE=4 SV=1;tr|G4V6T8|G4V6T8_SCHMA Uncharacterized protein OS=Schistosoma mansoni GN=Smp_083730.2 PE=4 SV=1	3	32.109	0.437753	21.8876	21.4459	21.3435	21.559	20.9274	21.23	21.2062	21.1212
G4V6T9	tr|G4V6T9|G4V6T9_SCHMA Putative centrin OS=Schistosoma mansoni GN=Smp_083740 PE=4 SV=1	1	19.151	M only				N/A	16.4763	16.5732	16.482	16.5105
G4V6V0	tr|G4V6V0|G4V6V0_SCHMA Uncharacterized protein OS=Schistosoma mansoni GN=Smp_006060 PE=4 SV=1	1	42.698	-0.561616	15.1739			15.1739	14.7984	16.1262	16.2818	15.7355
G4V6W0	tr|G4V6W0|G4V6W0_SCHMA Uncharacterized protein OS=Schistosoma mansoni GN=Smp_003340 PE=4 SV=1	11	121.55	0.0479813	15.4075	15.3508	16.0859	15.6147	15.1256	14.9913	16.5834	15.5667
G4V6W2	tr|G4V6W2|G4V6W2_SCHMA Uncharacterized protein OS=Schistosoma mansoni GN=Smp_123930 PE=4 SV=1	2	47.839	0.540484			16.1821	16.1821	15.5669	15.7777	15.5803	15.6416
G4V6X0_SCHMASynaptobrevin,putative	tr|G4V6X0|G4V6X0_SCHMA Synaptobrevin, putative|Pfam:PF00957 OS=Schistosoma mansoni GN=Smp_123870 PE=4 SV=1	4	18.193	2.66202	19.7929	19.6756	19.6636	19.7107			17.0487	17.0487
G4V6X1	tr|G4V6X1|G4V6X1_SCHMA Sh3 domain grb2-like protein B1 (Endophilin B1) OS=Schistosoma mansoni GN=Smp_003230 PE=4 SV=1	5	28.304	-3.52365			14.6743	14.6743	18.5957	16.8943	19.1039	18.198
G4V6X9	tr|G4V6X9|G4V6X9_SCHMA Putative sorting nexin OS=Schistosoma mansoni GN=Smp_003140.1 PE=4 SV=1	9	43.095	-1.27833	20.5127	19.3529	18.7224	19.5293	21.5569	19.3496	21.5165	20.8077
G4V6Y5	tr|G4V6Y5|G4V6Y5_SCHMA Kettin/titin-related protein OS=Schistosoma mansoni GN=Smp_197080 PE=4 SV=1	7	89.738	3.23998	19.406	19.5486	19.1224	19.359	16.6702	15.1664	16.5204	16.119
G4V6Y7	tr|G4V6Y7|G4V6Y7_SCHMA Putative kynurenine aminotransferase OS=Schistosoma mansoni GN=Smp_123750 PE=4 SV=1	18	110.87	-0.315595	20.0759	20.104	20.1604	20.1134	20.658	20.2868	20.3422	20.429
G4V6Z2	tr|G4V6Z2|G4V6Z2_SCHMA Putative gaba(A) receptor-associated protein OS=Schistosoma mansoni GN=Smp_073790 PE=3 SV=1	5	14.489	-0.371115	22.3735	21.7026	20.9519	21.676	22.0577	22.2003	21.8834	22.0471
G4V6Z5	tr|G4V6Z5|G4V6Z5_SCHMA Transmembrane 9 superfamily member OS=Schistosoma mansoni GN=Smp_162040 PE=3 SV=1	4	32.799	-1.38888	17.5302	16.9225	19.2427	17.8985	19.22	18.8947	19.7474	19.2874
G4V6Z7	tr|G4V6Z7|G4V6Z7_SCHMA Actin-related protein 2/3 complex subunit 5 OS=Schistosoma mansoni GN=Smp_073720.1 PE=3 SV=1	4	17.345	-0.181411	20.7547	20.8039	19.8227	20.4604	20.5743	21.0677	20.2836	20.6418
G4V6Z9;G4V700	tr|G4V6Z9|G4V6Z9_SCHMA Uncharacterized protein OS=Schistosoma mansoni GN=Smp_073690.2 PE=4 SV=1;tr|G4V700|G4V700_SCHMA Uncharacterized protein OS=Schistosoma mansoni GN=Smp_073690.1 PE=4 SV=1	6	26.776	2.27224	19.4489	19.15	19.1235	19.2408	17.8367	15.7403	17.3287	16.9686
G4V702	tr|G4V702|G4V702_SCHMA Uncharacterized protein OS=Schistosoma mansoni GN=Smp_162000 PE=4 SV=1	37	863.15	-1.9529	12.5384	13.1346	14.2747	13.3159	15.182	13.635	16.9894	15.2688
G4V703	tr|G4V703|G4V703_SCHMA Uncharacterized protein OS=Schistosoma mansoni GN=Smp_118280 PE=4 SV=1	3	20.303	-0.557442			15.511	15.511	14.9617	15.0848	18.1588	16.0685
G4V705	tr|G4V705|G4V705_SCHMA Putative methionyl-tRNA synthetase OS=Schistosoma mansoni GN=Smp_073620 PE=4 SV=1	15	32.899	0.689433	24.3835	23.9796	23.6985	24.0205	23.426	23.4353	23.1318	23.3311
G4V708	tr|G4V708|G4V708_SCHMA Putative platelet-activating factor acetylhydrolase ib OS=Schistosoma mansoni GN=Smp_073600 PE=4 SV=1	6	25.199	0.149873	20.4834	21.009	20.484	20.6588	20.6617	20.2626	20.6024	20.5089
G4V709	tr|G4V709|G4V709_SCHMA GTP-binding protein-like protein OS=Schistosoma mansoni GN=Smp_073590 PE=3 SV=1	8	22.5	0.284194	22.9149	22.7411	22.235	22.6303	22.1941	22.3019	22.5424	22.3461
G4V710	tr|G4V710|G4V710_SCHMA Uncharacterized protein OS=Schistosoma mansoni GN=Smp_161990 PE=4 SV=1	3	17.6	1.28948	19.3918	18.9446	20.2009	19.5124	17.6994	17.9223	19.0471	18.2229
G4V713	tr|G4V713|G4V713_SCHMA Putative eukaryotictranslation initiation factor 3 subunit OS=Schistosoma mansoni GN=Smp_006000 PE=4 SV=1	9	27.434	0.312496	21.8102	21.9409	22.3816	22.0442	21.5988	21.8537	21.7427	21.7318
G4V714	tr|G4V714|G4V714_SCHMA Putative eukaryotictranslation initiation factor 3 subunit OS=Schistosoma mansoni GN=Smp_101200 PE=4 SV=1	2	13.421	0.525463	20.4805	20.283	20.2616	20.3417	19.8218	20.0072	19.6196	19.8162
G4V720	tr|G4V720|G4V720_SCHMA RNA helicase OS=Schistosoma mansoni GN=Smp_125330 PE=3 SV=1	16	169.99	0.960554	17.0287	17.2218	18.1513	17.4673	17.0954	13.4359	18.9888	16.5067
G4V721;Q9XYR4	tr|G4V721|G4V721_SCHMA Putative phosphoenolpyruvate carboxykinase OS=Schistosoma mansoni GN=Smp_005880 PE=3 SV=1;tr|Q9XYR4|Q9XYR4_SCHMA Phosphoenolpyruvate carboxykinase OS=Schistosoma mansoni PE=2 SV=1	24	70.39	-0.930018	20.1985	20.3699	20.2098	20.2594	21.2495	21.4689	20.8498	21.1894
G4V725;G4V724;G4V723	tr|G4V725|G4V725_SCHMA Uncharacterized protein OS=Schistosoma mansoni GN=Smp_005860.1 PE=4 SV=1;tr|G4V724|G4V724_SCHMA Uncharacterized protein OS=Schistosoma mansoni GN=Smp_005860.3 PE=4 SV=1;tr|G4V723|G4V723_SCHMA Uncharacterized protein OS=Schistosoma ma	18	45.153	0.670847	26.1138	25.6009	25.6766	25.7971	25.2127	24.8418	25.3242	25.1263
G4V734	tr|G4V734|G4V734_SCHMA Putative gtp-binding protein (Q) alpha-11 subunit, gna11 OS=Schistosoma mansoni GN=Smp_005790 PE=4 SV=1	13	41.63	-1.16915	20.5946	21.0746	21.0133	20.8941	22.238	22.2033	21.7485	22.0633
G4V750;G4V751;G4V752	tr|G4V750|G4V750_SCHMA Putative granulin OS=Schistosoma mansoni GN=Smp_170550.2 PE=4 SV=1;tr|G4V751|G4V751_SCHMA Putative granulin OS=Schistosoma mansoni GN=Smp_170550.3 PE=4 SV=1;tr|G4V752|G4V752_SCHMA Putative granulin OS=Schistosoma mansoni GN=Smp_17055	5	76.843	-0.204389	18.4429	18.1144	17.9037	18.1537	18.1001	18.4344	18.5398	18.3581
G4V759	tr|G4V759|G4V759_SCHMA Uncharacterized protein OS=Schistosoma mansoni GN=Smp_064200 PE=4 SV=1	2	32.313	M only				N/A	15.0712	16.6539	14.9562	15.5604
G4V767	tr|G4V767|G4V767_SCHMA Putative cornichon OS=Schistosoma mansoni GN=Smp_082990 PE=4 SV=1	4	30.101	-0.32072	21.5711	21.7308	21.9241	21.742	22.0534	22.2697	21.865	22.0627
G4V768	tr|G4V768|G4V768_SCHMA Putative wd-repeat protein OS=Schistosoma mansoni GN=Smp_167150 PE=4 SV=1	8	41.983	-0.0374413	21.3761	21.6841	21.8191	21.6264	21.8456	21.8956	21.2503	21.6639
G4V773	tr|G4V773|G4V773_SCHMA Let1/narf-related OS=Schistosoma mansoni GN=Smp_083020 PE=3 SV=1	5	49.786	2.21057	17.2339	16.1857	16.2585	16.5594	14.9078	14.691	13.4475	14.3488
G4V774	tr|G4V774|G4V774_SCHMA Putative inhibitor of apoptosis (Iap) domain family member OS=Schistosoma mansoni GN=Smp_083030 PE=3 SV=1	5	31.754	0.114302	20.1401	20.0074	19.6612	19.9362	19.9455	19.8427	19.6775	19.8219
G4V775;G4V776	tr|G4V775|G4V775_SCHMA Adducin related protein OS=Schistosoma mansoni GN=Smp_083040.1 PE=4 SV=1;tr|G4V776|G4V776_SCHMA Adducin related protein OS=Schistosoma mansoni GN=Smp_083040.2 PE=4 SV=1	14	68.555	-0.671802	20.5131	20.7024	20.7847	20.6667	21.3874	21.1039	21.5243	21.3385
G4V779;G4V780	tr|G4V779|G4V779_SCHMA Elongation factor Tu OS=Schistosoma mansoni GN=Smp_073500.1 PE=3 SV=1;tr|G4V780|G4V780_SCHMA Elongation factor Tu OS=Schistosoma mansoni GN=Smp_073500.2 PE=3 SV=1	20	47.457	-0.279847	23.1552	23.2634	23.6833	23.3673	23.7258	23.7365	23.4792	23.6472
G4V783	tr|G4V783|G4V783_SCHMA Uncharacterized protein OS=Schistosoma mansoni GN=Smp_161960 PE=4 SV=1	3	38.585	F only	18.7473	18.1796	17.3844	18.1038				N/A
G4V785	tr|G4V785|G4V785_SCHMA Putative prefoldin subunit OS=Schistosoma mansoni GN=Smp_073540 PE=4 SV=1	8	20.549	0.480304	22.1983	21.9217	21.5586	21.8929	21.4657	21.5293	21.2427	21.4126
G4V786	tr|G4V786|G4V786_SCHMA Ribonuclease II-related OS=Schistosoma mansoni GN=Smp_161980 PE=3 SV=1	11	112.58	0.519466	16.8568	17.0297	17.3563	17.081	16.2144	17.1639	16.3062	16.5615
G4V788	tr|G4V788|G4V788_SCHMA G beta-like protein gbl OS=Schistosoma mansoni GN=Smp_073560.2 PE=4 SV=1	3	35.165	-0.0157517	16.3362			16.3362	15.9642	16.0573	17.0342	16.3519
G4V790	tr|G4V790|G4V790_SCHMA Deoxyuridine 5-triphosphate nucleotidohydrolase OS=Schistosoma mansoni GN=Smp_079240 PE=4 SV=1	8	16.811	0.956101	22.3954	22.353	21.7258	22.1581	21.1447	21.19	21.2712	21.202
G4V793;G4V792	tr|G4V793|G4V793_SCHMA GTP-binding nuclear protein OS=Schistosoma mansoni GN=Smp_079430.2 PE=3 SV=1;tr|G4V792|G4V792_SCHMA Putative ran OS=Schistosoma mansoni GN=Smp_079430.1 PE=4 SV=1	16	24.859	0.09926	24.8843	25.076	25.0816	25.014	24.8366	25.0075	24.9	24.9147
G4V7A8	tr|G4V7A8|G4V7A8_SCHMA Transmembrane protein tmp21-related OS=Schistosoma mansoni GN=Smp_079310 PE=3 SV=1	3	24.1	0.169624	21.598	21.9803	21.6597	21.746	21.3856	21.2186	22.1249	21.5764
G4V7B4;G4V7B3	tr|G4V7B4|G4V7B4_SCHMA Putative rna binding motif protein 4,lark OS=Schistosoma mansoni GN=Smp_079290.1 PE=4 SV=1;tr|G4V7B3|G4V7B3_SCHMA Putative rna binding motif protein 4,lark OS=Schistosoma mansoni GN=Smp_079290.3 PE=4 SV=1	17	32.245	0.569835	24.5126	24.1755	24.0963	24.2615	23.7743	23.8186	23.482	23.6917
G4V7C7	tr|G4V7C7|G4V7C7_SCHMA Uncharacterized protein OS=Schistosoma mansoni GN=Smp_194860 PE=4 SV=1	3	10.866	0.802868	20.175	20.9784	20.2247	20.4594			19.6565	19.6565
G4V7D6	tr|G4V7D6|G4V7D6_SCHMA Putative ATPase OS=Schistosoma mansoni GN=Smp_167200 PE=4 SV=1	17	66.115	1.07869	20.6948	21.1433	21.7096	21.1826	20.2503	19.7676	20.2937	20.1039
G4V7D8;G4V7D7	tr|G4V7D8|G4V7D8_SCHMA Uncharacterized protein OS=Schistosoma mansoni GN=Smp_083080.1 PE=4 SV=1;tr|G4V7D7|G4V7D7_SCHMA Uncharacterized protein OS=Schistosoma mansoni GN=Smp_083080.2 PE=4 SV=1	15	38.515	-0.634571	23.4847	23.5304	23.5781	23.5311	24.1669	24.3444	23.9856	24.1656
G4V7E1	tr|G4V7E1|G4V7E1_SCHMA Putative mitochondrial translational initiation factor OS=Schistosoma mansoni GN=Smp_167220 PE=4 SV=1	10	73.14	1.03216	17.5207	17.6717	18.1557	17.7827	16.9492	16.2658	17.0367	16.7506
G4V7E3	tr|G4V7E3|G4V7E3_SCHMA Putative mitochondrial chaperone BCS1 OS=Schistosoma mansoni GN=Smp_083120 PE=4 SV=1	8	39.668	-0.48568	13.9243	17.5804	19.0791	16.8613	17.8017	17.5162	16.7229	17.347
G4V7E9	tr|G4V7E9|G4V7E9_SCHMA Putative mrna-capping enzyme OS=Schistosoma mansoni GN=Smp_196350 PE=4 SV=1	2	22.519	-0.0447769	17.5182	17.2001	17.0492	17.2558	17.3006			17.3006
G4V7F3	tr|G4V7F3|G4V7F3_SCHMA Uncharacterized protein OS=Schistosoma mansoni GN=Smp_167240 PE=4 SV=1	3	88.208	0.164679	17.7148	16.974	16.7485	17.1458	16.4368	17.5652	16.9413	16.9811
G4V7F5;G4V7F4	tr|G4V7F5|G4V7F5_SCHMA Ubiquitin carboxyl-terminal hydrolase OS=Schistosoma mansoni GN=Smp_083200.1 PE=3 SV=1;tr|G4V7F4|G4V7F4_SCHMA Ubiquitin carboxyl-terminal hydrolase OS=Schistosoma mansoni GN=Smp_083200.2 PE=3 SV=1	9	35.659	0.427647	21.2472	21.0683	21.0343	21.1166	20.4323	20.9708	20.6638	20.689
G4V7F6	tr|G4V7F6|G4V7F6_SCHMA Uncharacterized protein OS=Schistosoma mansoni GN=Smp_167250 PE=4 SV=1	6	56.721	-2.48959	13.6602	14.8287	14.9101	14.4663	16.6769	16.6997	17.4912	16.9559
G4V7G0	tr|G4V7G0|G4V7G0_SCHMA COP9 signalosome subunit 6 (M67 family) OS=Schistosoma mansoni GN=Smp_126690 PE=4 SV=1	2	35.86	0.185446	18.7748	18.4895	18.7743	18.6795	18.7699	18.4817	18.2307	18.4941
G4V7G3	tr|G4V7G3|G4V7G3_SCHMA Proteasome assembly chaperone 2 OS=Schistosoma mansoni GN=Smp_126670 PE=3 SV=1	3	29.848	0.20184	19.3971	19.3566	19.4797	19.4111	18.969	19.5083	19.1505	19.2093
G4V7G8	tr|G4V7G8|G4V7G8_SCHMA Putative adenosine kinase OS=Schistosoma mansoni GN=Smp_008360 PE=1 SV=1	9	39.392	-0.267992	20.5217	20.4569	20.1596	20.3794	20.6604	20.9568	20.3249	20.6474
G4V7H0	tr|G4V7H0|G4V7H0_SCHMA Putative pap-inositol-1,4-phosphatase OS=Schistosoma mansoni GN=Smp_008320 PE=4 SV=1	14	35.399	0.0197707	21.5649	21.1937	21.0952	21.2846	21.346	21.3356	21.1129	21.2648
G4V7H1;O17462	tr|G4V7H1|G4V7H1_SCHMA Putative succinate dehydrogenase OS=Schistosoma mansoni GN=Smp_008310 PE=4 SV=1;tr|O17462|O17462_SCHMA Uncharacterized protein (Fragment) OS=Schistosoma mansoni PE=2 SV=1	2	21.472	0.0696777		16.282	17.2377	16.7598	16.6085	15.0439	18.4181	16.6902
G4V7H8	tr|G4V7H8|G4V7H8_SCHMA Putative rab-18 OS=Schistosoma mansoni GN=Smp_008230 PE=4 SV=1	2	23.993	0.765046	16.7852	17.7556		17.2704	16.9462	15.6128	16.957	16.5053
G4V7I6;G4V7I7	tr|G4V7I6|G4V7I6_SCHMA Uncharacterized protein OS=Schistosoma mansoni GN=Smp_008140.1 PE=4 SV=1;tr|G4V7I7|G4V7I7_SCHMA Uncharacterized protein OS=Schistosoma mansoni GN=Smp_008140.2 PE=4 SV=1	5	18.397	2.9135	19.339	19.5097	19.2089	19.3525	15.3414	17.0999	16.8758	16.439
G4V7J3	tr|G4V7J3|G4V7J3_SCHMA Putative ubiquitin fusion degradaton protein OS=Schistosoma mansoni GN=Smp_196510 PE=4 SV=1	11	32.844	0.372551	21.2305	21.2488	21.1922	21.2238	20.8041	20.9416	20.8081	20.8513
G4V7J7;G4V7J8	tr|G4V7J7|G4V7J7_SCHMA V-type proton ATPase subunit a OS=Schistosoma mansoni GN=Smp_040970.1 PE=3 SV=1;tr|G4V7J8|G4V7J8_SCHMA V-type proton ATPase subunit a OS=Schistosoma mansoni GN=Smp_040970.3 PE=3 SV=1	7	98.399	-0.00742646	13.9525	17.1062	16.9419	16.0002	15.3454	16.4009	16.2765	16.0076
G4V7K0	tr|G4V7K0|G4V7K0_SCHMA RNA cytidine acetyltransferase OS=Schistosoma mansoni GN=Smp_144490 PE=3 SV=1	15	143.5	0.851992	15.129	16.6866	17.6163	16.4773	14.4149		16.8358	15.6253
G4V7L0	tr|G4V7L0|G4V7L0_SCHMA Uncharacterized protein OS=Schistosoma mansoni GN=Smp_163430 PE=4 SV=1	2	49.208	F only	16.4856	15.8475	15.8275	16.0535				N/A
G4V7L5	tr|G4V7L5|G4V7L5_SCHMA Putative DNA polymerase delta small subunit OS=Schistosoma mansoni GN=Smp_076660 PE=4 SV=1	12	59.157	0.0672686	19.0391	19.2081	19.1772	19.1415	19.3319	19.2965	18.5942	19.0742
G4V7L7;G4V7L6	tr|G4V7L7|G4V7L7_SCHMA 60S ribosomal export protein NMD3 OS=Schistosoma mansoni GN=Smp_076630.1 PE=3 SV=1;tr|G4V7L6|G4V7L6_SCHMA 60S ribosomal export protein NMD3 OS=Schistosoma mansoni GN=Smp_076630.2 PE=3 SV=1	4	42.632	0.309245	14.7364	14.9488	16.2257	15.3036		16.0331	13.9557	14.9944
G4V7M3;G4V7M2	tr|G4V7M3|G4V7M3_SCHMA Putative propionyl-CoA carboxylase alpha subunit OS=Schistosoma mansoni GN=Smp_165400.1 PE=4 SV=1;tr|G4V7M2|G4V7M2_SCHMA Putative propionyl-CoA carboxylase alpha subunit OS=Schistosoma mansoni GN=Smp_165400.3 PE=4 SV=1	4	102.14	-0.985897	14.2553	14.1309		14.1931	14.8873	15.2871	15.3625	15.179
G4V7M6	tr|G4V7M6|G4V7M6_SCHMA Putative zinc finger protein OS=Schistosoma mansoni GN=Smp_165420 PE=4 SV=1	2	444.01	M only				N/A	14.8271	14.2801	9.16639	12.7579
G4V7M7	tr|G4V7M7|G4V7M7_SCHMA Uncharacterized protein OS=Schistosoma mansoni GN=Smp_080360 PE=4 SV=1	2	25.3	F only	18.6868	18.9623	19.744	19.131				N/A
G4V7P2;G4V7P3	tr|G4V7P2|G4V7P2_SCHMA Uncharacterized protein OS=Schistosoma mansoni GN=Smp_035560.2 PE=4 SV=1;tr|G4V7P3|G4V7P3_SCHMA Uncharacterized protein OS=Schistosoma mansoni GN=Smp_035560.1 PE=4 SV=1	11	17.557	-1.67549	24.5226	24.5386	24.0076	24.3562	26.3196	26.1213	25.6543	26.0317
G4V7P4	tr|G4V7P4|G4V7P4_SCHMA Serine/threonine-protein phosphatase OS=Schistosoma mansoni GN=Smp_035580 PE=3 SV=1	10	36.865	-0.946966	19.6561	19.9967	19.4612	19.7046	20.7567	20.7345	20.4636	20.6516
G4V7P7	tr|G4V7P7|G4V7P7_SCHMA Uncharacterized protein OS=Schistosoma mansoni GN=Smp_035620 PE=4 SV=1	4	20.262	0.402935	18.969	18.785	18.6076	18.7872	18.5287	19.4357	17.1883	18.3842
G4V7P9	tr|G4V7P9|G4V7P9_SCHMA Uncharacterized protein OS=Schistosoma mansoni GN=Smp_141330 PE=4 SV=1	10	37.405	0.945627	21.1504	20.9087	20.5111	20.8567	20.0172	19.4051	20.311	19.9111
G4V7Q4	tr|G4V7Q4|G4V7Q4_SCHMA Pyruvate carboxylase OS=Schistosoma mansoni GN=Smp_141360 PE=4 SV=1	31	132.3	-0.68663	18.667	19.5093	19.8758	19.3507	20.2103	19.7038	20.1979	20.0373
G4V7R0	tr|G4V7R0|G4V7R0_SCHMA Innexin OS=Schistosoma mansoni GN=inx PE=3 SV=1	3	49.12	-1.70082	12.7522	17.217		14.9846	16.5758	15.3219	18.1586	16.6854
G4V7R2;G4V7R4;G4V7R1;G4V7R3	tr|G4V7R2|G4V7R2_SCHMA Innexin OS=Schistosoma mansoni GN=inx PE=3 SV=1;tr|G4V7R4|G4V7R4_SCHMA Innexin OS=Schistosoma mansoni GN=inx PE=3 SV=1;tr|G4V7R1|G4V7R1_SCHMA Innexin OS=Schistosoma mansoni GN=inx PE=3 SV=1;tr|G4V7R3|G4V7R3_SCHMA Innexin OS=Schistoso	14	52.475	-1.02534	19.96	20.7476	20.5475	20.4184	21.534	20.5011	22.296	21.4437
G4V7R5	tr|G4V7R5|G4V7R5_SCHMA Putative calpain 4, 6, 7, invertebrate OS=Schistosoma mansoni GN=Smp_141280 PE=4 SV=1	5	43.477	M only				N/A	18.3199	18.8666	17.9499	18.3788
G4V7R9	tr|G4V7R9|G4V7R9_SCHMA Dolichyl-diphosphooligosaccharide--protein glycosyltransferase 48 kDa subunit OS=Schistosoma mansoni GN=Smp_035470 PE=3 SV=1	13	48.681	-0.31818	21.5269	21.6663	22.1092	21.7675	22.0978	22.4172	21.742	22.0856
G4V7S7	tr|G4V7S7|G4V7S7_SCHMA Putative nucleobindin OS=Schistosoma mansoni GN=Smp_144560 PE=4 SV=1	1	43.253	M only				N/A	16.5708	16.6581	16.2083	16.4791
G4V7S8	tr|G4V7S8|G4V7S8_SCHMA Serine hydroxymethyltransferase OS=Schistosoma mansoni GN=Smp_144570 PE=3 SV=1	6	55.549	-0.927713	14.3529	17.1327	17.6595	16.3817	18.2224	16.2419	17.464	17.3094
G4V7T9	tr|G4V7T9|G4V7T9_SCHMA Putative trim56 protein OS=Schistosoma mansoni GN=Smp_054730 PE=4 SV=1	5	34.032	-0.523974	16.3472	17.2619	18.8	17.4697	18.6338	17.0976	18.2497	17.9937
G4V7U0	tr|G4V7U0|G4V7U0_SCHMA Uncharacterized protein OS=Schistosoma mansoni GN=Smp_054740 PE=4 SV=1	4	35.413	0.662981		17.7721	17.7617	17.7669	16.0993	18.2959	16.9166	17.1039
G4V7U1	tr|G4V7U1|G4V7U1_SCHMA Putative brat protein OS=Schistosoma mansoni GN=Smp_054750 PE=4 SV=1	2	23.801	M only				N/A	17.234	18.8577	18.2273	18.1063
G4V7U3	tr|G4V7U3|G4V7U3_SCHMA 40S ribosomal protein S8 OS=Schistosoma mansoni GN=Smp_054780 PE=3 SV=1	16	24.857	0.0954624	22.6077	22.0436	22.109	22.2534	21.3124	20.5558	24.6057	22.158
G4V7U4;G4V7U5	tr|G4V7U4|G4V7U4_SCHMA Putative microtubule associated protein xmap215 OS=Schistosoma mansoni GN=Smp_054790.2 PE=4 SV=1;tr|G4V7U5|G4V7U5_SCHMA Putative microtubule associated protein xmap215 OS=Schistosoma mansoni GN=Smp_054790.1 PE=4 SV=1	28	226.98	-0.0672115	18.2399	18.3366	18.5153	18.3639	18.3534	17.9824	18.9577	18.4311
G4V7U6	tr|G4V7U6|G4V7U6_SCHMA Related to multifunctional cyclin-dependent kinase-related OS=Schistosoma mansoni GN=Smp_054800 PE=4 SV=1	4	60.599	-0.0352306	17.7529	18.3697	18.434	18.1855	18.0048	18.3309	18.3266	18.2207
G4V7V0	tr|G4V7V0|G4V7V0_SCHMA Putative DNA replication licensing factor MCM2 OS=Schistosoma mansoni GN=Smp_054840 PE=3 SV=1	15	51.887	-0.362704	19.6853	19.9311	19.978	19.8648	20.223	20.5291	19.9304	20.2275
G4V7V1	tr|G4V7V1|G4V7V1_SCHMA Putative DNA replication licensing factor MCM2 OS=Schistosoma mansoni GN=Smp_079560 PE=4 SV=1	11	56.424	0.345447	19.9202	19.7279	19.7508	19.7996	19.2641	20.2252	18.8733	19.4542
G4V7V2	tr|G4V7V2|G4V7V2_SCHMA Uncharacterized protein OS=Schistosoma mansoni GN=Smp_079570 PE=4 SV=1	2	48.783	0.16861	16.5762	16.549		16.5626	16.2	16.5548	16.4272	16.394
G4V7V5	tr|G4V7V5|G4V7V5_SCHMA Uncharacterized protein OS=Schistosoma mansoni GN=Smp_079600 PE=4 SV=1	2	48.27	M only				N/A	16.6186	17.1528	16.6366	16.8027
G4V7X4	tr|G4V7X4|G4V7X4_SCHMA Putative ctl2 OS=Schistosoma mansoni GN=Smp_160740 PE=3 SV=1	8	64.916	-0.48571	18.1852	18.4024	19.154	18.5805	19.3702	19.3066	18.5219	19.0663
G4V7X6	tr|G4V7X6|G4V7X6_SCHMA Serine/threonine kinase OS=Schistosoma mansoni GN=Smp_160760 PE=4 SV=1	6	120.98	-2.25503		14.513	13.8335	14.1732	16.2284	16.4514	16.6049	16.4283
G4V7X7	tr|G4V7X7|G4V7X7_SCHMA Actin-related protein 2/3 complex subunit 4 OS=Schistosoma mansoni GN=Smp_160770.1 PE=3 SV=1	5	19.651	-2.08285	17.674	18.1702	19.4526	18.4322	20.9385	20.3069	20.2998	20.5151
G4V7X9	tr|G4V7X9|G4V7X9_SCHMA Adducin related protein OS=Schistosoma mansoni GN=Smp_071140 PE=4 SV=1	19	86.545	-1.23438	17.944	18.6895	19.1105	18.5813	20.0268	19.7047	19.7156	19.8157
G4V7Y0	tr|G4V7Y0|G4V7Y0_SCHMA Formin binding protein and related proteins OS=Schistosoma mansoni GN=Smp_071150 PE=4 SV=1	3	65.288	0.483863	15.8433	15.67	15.1974	15.5703	15.1791	15.3433	14.7368	15.0864
G4V7Y2	tr|G4V7Y2|G4V7Y2_SCHMA Putative rna binding motif protein OS=Schistosoma mansoni GN=Smp_141240 PE=4 SV=1	4	78.675	0.928212		16.21	16.2548	16.2324	15.9016	16.2673	13.7437	15.3042
G4V7Y4;G4V7Y3	tr|G4V7Y4|G4V7Y4_SCHMA Serine/threonine protein phosphatase 2A regulatory subunit OS=Schistosoma mansoni GN=Smp_035430.2 PE=3 SV=1;tr|G4V7Y3|G4V7Y3_SCHMA Serine/threonine protein phosphatase 2A regulatory subunit OS=Schistosoma mansoni GN=Smp_035430.1 PE=3	6	56.536	0.36832	20.0845	20.1308	20.0567	20.0907	19.648	18.8216	20.6974	19.7223
G4V7Y5	tr|G4V7Y5|G4V7Y5_SCHMA Putative mitochondrial ribosomal protein L24 OS=Schistosoma mansoni GN=Smp_035410 PE=4 SV=1	6	33.539	1.5194	19.5316	18.7462	19.1044	19.1274	17.5509	16.7686	18.5045	17.608
G4V7Z3;G4V7Z4	tr|G4V7Z3|G4V7Z3_SCHMA Putative snare protein sec22 OS=Schistosoma mansoni GN=Smp_035300.1 PE=3 SV=1;tr|G4V7Z4|G4V7Z4_SCHMA Putative snare protein sec22 OS=Schistosoma mansoni GN=Smp_035300.2 PE=3 SV=1	7	22.16	0.684733	20.5973	20.4879	20.674	20.5864	20.302	20.1774	19.2256	19.9017
G4V7Z6	tr|G4V7Z6|G4V7Z6_SCHMA Adenylyltransferase and sulfurtransferase MOCS3 OS=Schistosoma mansoni GN=Smp_035280 PE=3 SV=1	9	55.893	1.76732	18.9343	19.7559	19.697	19.4624	17.4596	17.9777	17.6479	17.6951
G4V7Z7;G4V7Z8	tr|G4V7Z7|G4V7Z7_SCHMA Malate dehydrogenase OS=Schistosoma mansoni GN=Smp_035270.2 PE=3 SV=1;tr|G4V7Z8|G4V7Z8_SCHMA Malate dehydrogenase OS=Schistosoma mansoni GN=Smp_035270.1 PE=3 SV=1	25	36.198	-1.50723	24.8272	24.7507	24.669	24.749	26.3439	26.3518	26.0729	26.2562
G4V801	tr|G4V801|G4V801_SCHMA Kinesin-like protein OS=Schistosoma mansoni GN=Smp_035220 PE=3 SV=1	3	68.564	M only				N/A	14.3783	15.3256	15.828	15.1773
G4V805;G4V804;G4V803;G4V806	tr|G4V805|G4V805_SCHMA Putative hsp40, subfamily A, members 1,2,4 OS=Schistosoma mansoni GN=Smp_035200.4 PE=3 SV=1;tr|G4V804|G4V804_SCHMA Putative hsp40, subfamily A, members 1,2,4 OS=Schistosoma mansoni GN=Smp_035200.3 PE=4 SV=1;tr|G4V803|G4V803_SCHMA Put	24	45.224	-0.185815	25.3598	24.9782	25.4458	25.2613	25.3306	25.4751	25.5355	25.4471
G4V816	tr|G4V816|G4V816_SCHMA Uncharacterized protein OS=Schistosoma mansoni GN=Smp_035110 PE=3 SV=1	3	43.988	-0.285447	18.2545	16.9021	18.4414	17.866	17.7606	18.2211	18.4726	18.1514
G4V818;G4V819;G4V820	tr|G4V818|G4V818_SCHMA Putative hepatoma up-regulated protein OS=Schistosoma mansoni GN=Smp_035090.3 PE=4 SV=1;tr|G4V819|G4V819_SCHMA Putative hepatoma up-regulated protein OS=Schistosoma mansoni GN=Smp_035090.1 PE=4 SV=1;tr|G4V820|G4V820_SCHMA Putative he	4	87.026	-0.894324	15.9402		16.9957	16.468	16.9584	17.5381	17.5904	17.3623
G4V823	tr|G4V823|G4V823_SCHMA Putative phospholipase DDHD1 OS=Schistosoma mansoni GN=Smp_141150 PE=4 SV=1	2	83.678	-2.69792	16.5866	15.78	15.3825	15.9164	18.5801	19.0053	18.2575	18.6143
G4V825	tr|G4V825|G4V825_SCHMA Putative atp-dependent RNA helicase OS=Schistosoma mansoni GN=Smp_035030 PE=4 SV=1	40	145.19	-0.0815838	20.0889	20.5356	21.1393	20.5879	20.6236	19.7834	21.6015	20.6695
G4V830	tr|G4V830|G4V830_SCHMA Putative tfiid subunit OS=Schistosoma mansoni GN=Smp_141140 PE=4 SV=1	4	38.752	1.07466	14.4948	15.3978	15.914	15.2689	14.8126		13.5758	14.1942
G4V838;G4V839;G4V840;O17460;O17459	tr|G4V838|G4V838_SCHMA Uncharacterized protein OS=Schistosoma mansoni GN=Smp_034940.1 PE=4 SV=1;tr|G4V839|G4V839_SCHMA Uncharacterized protein OS=Schistosoma mansoni GN=Smp_034940.2 PE=4 SV=1;tr|G4V840|G4V840_SCHMA Uncharacterized protein OS=Schistosoma ma	25	88.594	1.26023	20.9533	20.8172	20.8612	20.8773	19.4429	19.0184	20.3898	19.617
G4V841	tr|G4V841|G4V841_SCHMA Putative DNAj (Hsp40) homolog, subfamily B, member OS=Schistosoma mansoni GN=Smp_141080 PE=4 SV=1	8	41.95	-0.950165	20.6033	20.3049	20.2991	20.4025	21.2604	21.5096	21.2879	21.3526
G4V842	tr|G4V842|G4V842_SCHMA Putative dynein heavy chain OS=Schistosoma mansoni GN=Smp_034920 PE=4 SV=1	12	414.92	-2.62652		12.1595	11.8896	12.0245	14.2301	13.9127	15.8103	14.651
G4V844	tr|G4V844|G4V844_SCHMA AP complex subunit beta OS=Schistosoma mansoni GN=Smp_034870 PE=3 SV=1	17	95.869	-1.0575	18.9488	19.1353	18.8607	18.9816	20.0505	20.1394	19.9274	20.0391
G4V848	tr|G4V848|G4V848_SCHMA Mps one binder kinase activator-like 2 (Mob1 homolog 2) (Protein mob3) OS=Schistosoma mansoni GN=Smp_095470 PE=4 SV=1	4	25.701	-0.0396846	17.6189	19.1718	18.2049	18.3318	18.348	17.8567	18.9099	18.3715
G4V867	tr|G4V867|G4V867_SCHMA Putative cop-coated vesicle membrane protein P24 (Emp24/gp25l family) OS=Schistosoma mansoni GN=Smp_154960.1 PE=3 SV=1	4	25.013	-0.62405	21.3218	21.3229	21.7616	21.4687	22.1941	22.1393	21.945	22.0928
G4V872	tr|G4V872|G4V872_SCHMA Uncharacterized protein OS=Schistosoma mansoni GN=Smp_086060 PE=4 SV=1	3	13.731	-0.991779	14.2789	18.984	17.8135	17.0255	18.0926	18.3562	17.603	18.0173
G4V876	tr|G4V876|G4V876_SCHMA Synaptosomal-associated protein OS=Schistosoma mansoni GN=Smp_164210 PE=3 SV=1	3	22.52	3.24881	20.546	20.2865	20.2852	20.3725	17.7762	16.8203	16.7746	17.1237
G4V882	tr|G4V882|G4V882_SCHMA Putative rrm/rnp domain OS=Schistosoma mansoni GN=Smp_088550 PE=4 SV=1	7	130.71	1.54784	16.4467	16.5472	16.7032	16.5657	13.8177		16.218	15.0179
G4V884	tr|G4V884|G4V884_SCHMA Uncharacterized protein OS=Schistosoma mansoni GN=Smp_006780 PE=4 SV=1	7	23.231	0.540568	20.9639	21.0783	20.9938	21.012	20.661	20.8304	19.9229	20.4714
G4V889;G4V888;G4V890	tr|G4V889|G4V889_SCHMA Uncharacterized protein OS=Schistosoma mansoni GN=Smp_006830.1 PE=4 SV=1;tr|G4V888|G4V888_SCHMA Uncharacterized protein OS=Schistosoma mansoni GN=Smp_006830.3 PE=4 SV=1;tr|G4V890|G4V890_SCHMA Uncharacterized protein OS=Schistosoma ma	5	25.153	0.253502	21.3465	20.892	20.7174	20.9853	20.6589	20.7623	20.7743	20.7318
G4V895;G4V896	tr|G4V895|G4V895_SCHMA Uncharacterized protein OS=Schistosoma mansoni GN=Smp_006860.2 PE=4 SV=1;tr|G4V896|G4V896_SCHMA Uncharacterized protein OS=Schistosoma mansoni GN=Smp_006860.1 PE=4 SV=1	4	20.938	0.753462	18.6942	18.8104	17.2112	18.2386	17.8617	17.2351	17.3585	17.4851
G4V8A5	tr|G4V8A5|G4V8A5_SCHMA Putative spectrin beta chain, brain 4 (Spectrin, non-erythroid beta chain 4) (Beta-V spectrin) (BSPECV) OS=Schistosoma mansoni GN=Smp_196570 PE=4 SV=1	119	282.37	-1.11579	22.001	21.9804	21.9286	21.97	22.9371	23.2489	23.0713	23.0858
G4V8A7	tr|G4V8A7|G4V8A7_SCHMA Putative collagen alpha-1(V) chain OS=Schistosoma mansoni GN=Smp_170330 PE=3 SV=1	5	295.97	-2.43665	13.7874	14.1904	14.0624	14.0134	17.4392	16.1909	15.72	16.45
G4V8A8	tr|G4V8A8|G4V8A8_SCHMA Putative collagen alpha-1(V) chain OS=Schistosoma mansoni GN=Smp_170340 PE=3 SV=1	7	176.75	-1.68643	16.6876	16.6948	17.1511	16.8445	18.9101	18.4736	18.2092	18.5309
G4V8B3	tr|G4V8B3|G4V8B3_SCHMA Uncharacterized protein OS=Schistosoma mansoni GN=Smp_020450 PE=4 SV=1	10	55.41	-0.293929	20.4465	20.257	20.0861	20.2632	20.4497	20.9083	20.3134	20.5571
G4V8B4	tr|G4V8B4|G4V8B4_SCHMA Putative arginyl-tRNA synthetase OS=Schistosoma mansoni GN=Smp_133280 PE=3 SV=1	29	71.361	0.377904	22.1449	22.1426	22.2101	22.1659	21.8709	22.0166	21.4765	21.788
G4V8B5	tr|G4V8B5|G4V8B5_SCHMA Sel-1-like protein, sel-1l OS=Schistosoma mansoni GN=Smp_133270 PE=4 SV=1	12	87.214	-1.4636	16.5918	17.6581	18.6747	17.6415	18.9474	19.2167	19.1513	19.1051
G4V8C2	tr|G4V8C2|G4V8C2_SCHMA Reticulon-like protein OS=Schistosoma mansoni GN=Smp_020370 PE=4 SV=1	4	24.279	-0.865187	20.4487	20.3863	20.704	20.513	21.4326	21.3217	21.3803	21.3782
G4V8C4;G4V8C5	tr|G4V8C4|G4V8C4_SCHMA Putative alpha-glucosidase OS=Schistosoma mansoni GN=Smp_020340 PE=3 SV=1;tr|G4V8C5|G4V8C5_SCHMA Putative alpha-glucosidase OS=Schistosoma mansoni GN=Smp_133210 PE=3 SV=1	7	101.57	-2.21285		12.8204	14.7593	13.7899	15.7676	15.0416	17.1989	16.0027
G4V8C7	tr|G4V8C7|G4V8C7_SCHMA ATP-dependent Clp protease proteolytic subunit OS=Schistosoma mansoni GN=Smp_210400 PE=3 SV=1	2	27.948	0.341873	19.6515	19.6027	19.4584	19.5709	19.3559	19.1697	19.1614	19.229
G4V8C8	tr|G4V8C8|G4V8C8_SCHMA Peptidase Clp (S14 family) OS=Schistosoma mansoni GN=Smp_210410 PE=4 SV=1	6	36.186	1.02837	18.6716	19.7637	18.5849	19.0068	19.2373	19.0161	15.6818	17.9784
G4V8D3	tr|G4V8D3|G4V8D3_SCHMA Uncharacterized protein OS=Schistosoma mansoni GN=Smp_020210 PE=4 SV=1	2	67.318	1.17215		18.2644		18.2644	17.5853	17.0723	16.6191	17.0922
G4V8D5;G4V8D6	tr|G4V8D5|G4V8D5_SCHMA Putative zeta-coat protein OS=Schistosoma mansoni GN=Smp_020220.1 PE=4 SV=1;tr|G4V8D6|G4V8D6_SCHMA Putative zeta-coat protein OS=Schistosoma mansoni GN=Smp_020220.2 PE=4 SV=1	3	19.502	0.335928	21.8418	21.4629	21.0851	21.4633	21.2517	21.2246	20.9057	21.1273
G4V8E5;G4V8E4	tr|G4V8E5|G4V8E5_SCHMA Putative dead box ATP-dependent RNA helicase OS=Schistosoma mansoni GN=Smp_133120.2 PE=4 SV=1;tr|G4V8E4|G4V8E4_SCHMA Putative dead box ATP-dependent RNA helicase OS=Schistosoma mansoni GN=Smp_133120.1 PE=4 SV=1	19	100.52	-0.394532	17.0942	15.6231	18.5943	17.1039	14.4141		20.5827	17.4984
G4V8F5	tr|G4V8F5|G4V8F5_SCHMA Rhomboid-like protein OS=Schistosoma mansoni GN=Smp_020090 PE=3 SV=1	2	44.756	-0.013775	16.6604			16.6604	16.5464	17.2503	16.2258	16.6742
G4V8F9	tr|G4V8F9|G4V8F9_SCHMA Uncharacterized protein OS=Schistosoma mansoni GN=Smp_020060 PE=4 SV=1	9	75.327	-0.927515	18.8706	18.5253	18.5398	18.6452	19.6833	19.721	19.3139	19.5727
G4V8G0	tr|G4V8G0|G4V8G0_SCHMA Putative cop9 signalosome complex subunit OS=Schistosoma mansoni GN=Smp_020050 PE=4 SV=1	11	51.839	-0.0422845	20.0944	20.1062	19.7874	19.996	20.053	20.3764	19.6855	20.0383
G4V8G2;G4V8G1	tr|G4V8G2|G4V8G2_SCHMA Uncharacterized protein OS=Schistosoma mansoni GN=Smp_020040.2 PE=3 SV=1;tr|G4V8G1|G4V8G1_SCHMA Uncharacterized protein OS=Schistosoma mansoni GN=Smp_020040.1 PE=3 SV=1	11	42.117	-0.336539	20.9148	20.7107	20.6973	20.7743	21.1324	21.2778	20.9223	21.1108
G4V8G8	tr|G4V8G8|G4V8G8_SCHMA Putative syntaxin OS=Schistosoma mansoni GN=Smp_019890 PE=3 SV=1	7	29.962	F only	20.443	20.0881	20.3169	20.2827				N/A
G4V8H1	tr|G4V8H1|G4V8H1_SCHMA Putative p38 MAPk OS=Schistosoma mansoni GN=Smp_191040 PE=4 SV=1	1	10.145	-1.00988		18.5215	18.0379	18.2797	19.2656	19.494	19.1091	19.2896
G4V8H2	tr|G4V8H2|G4V8H2_SCHMA Putative lung seven transmembrane receptor OS=Schistosoma mansoni GN=Smp_170350 PE=4 SV=1	1	39.826	-0.88214		15.3873	16.5761	15.9817	16.8027	16.5638	17.2249	16.8638
G4V8H4	tr|G4V8H4|G4V8H4_SCHMA Putative abc1 family OS=Schistosoma mansoni GN=Smp_021330.2 PE=4 SV=1	5	67.77	-0.244878	16.8467	17.0656	17.9844	17.2989	17.821	16.6549	18.1555	17.5438
G4V8H7	tr|G4V8H7|G4V8H7_SCHMA Putative importin 7 OS=Schistosoma mansoni GN=Smp_133710 PE=4 SV=1	14	61.683	0.315352	21.125	21.1368	21.3061	21.1893	20.967	20.8521	20.8028	20.874
G4V8I1	tr|G4V8I1|G4V8I1_SCHMA Putative udp-glucose glycoprotein:glucosyltransferase OS=Schistosoma mansoni GN=Smp_133700 PE=4 SV=1	23	189.18	-1.22067	16.0468	17.1922	17.3963	16.8784	17.8512	17.8987	18.5474	18.0991
G4V8J1	tr|G4V8J1|G4V8J1_SCHMA Uncharacterized protein OS=Schistosoma mansoni GN=Smp_148060 PE=4 SV=1	3	17.186	F only	16.949	16.8216	16.3741	16.7149				N/A
G4V8K6;G4V8K4;G4V8K7;G4V8K5;G4V8K2;G4V8K3	tr|G4V8K6|G4V8K6_SCHMA Uncharacterized protein OS=Schistosoma mansoni GN=Smp_090930.2 PE=4 SV=1;tr|G4V8K4|G4V8K4_SCHMA Uncharacterized protein OS=Schistosoma mansoni GN=Smp_090930.7 PE=4 SV=1;tr|G4V8K7|G4V8K7_SCHMA Uncharacterized protein OS=Schistosoma ma	4	66.181	F only	18.267	16.8739	18.0237	17.7215				N/A
G4V8K8	tr|G4V8K8|G4V8K8_SCHMA Putative mitochondrial 28S ribosomal protein S14 (S14mt) OS=Schistosoma mansoni GN=Smp_090920.1 PE=4 SV=1	2	25.21	0.593473	16.9188	17.142	17.2697	17.1102	15.9331		17.1003	16.5167
G4V8L1	tr|G4V8L1|G4V8L1_SCHMA Uncharacterized protein OS=Schistosoma mansoni GN=Smp_090870 PE=4 SV=1	9	96.66	-0.670765	17.6502	18.2551	18.7751	18.2268	18.4655	19.0881	19.1392	18.8976
G4V8L2	tr|G4V8L2|G4V8L2_SCHMA Uncharacterized protein OS=Schistosoma mansoni GN=Smp_090860 PE=4 SV=1	18	55.655	0.641532	21.5093	21.5185	21.2993	21.4424	20.7126	20.998	20.6919	20.8008
G4V8L4	tr|G4V8L4|G4V8L4_SCHMA Putative heat shock protein 70 OS=Schistosoma mansoni GN=Smp_106930 PE=3 SV=1	1	69.858	0.145491	21.8689	22.4829	22.4952	22.2823	21.8896	21.4248	23.0962	22.1368
G4V8L9	tr|G4V8L9|G4V8L9_SCHMA Histone H2A OS=Schistosoma mansoni GN=Smp_086860 PE=3 SV=1	2	14.577	-0.927772	22.2046	21.7402	21.4896	21.8114	22.613	22.6575	22.9471	22.7392
G4V8M3;G4V8M2;G4V8M4	tr|G4V8M3|G4V8M3_SCHMA Uncharacterized protein OS=Schistosoma mansoni GN=Smp_019940.1 PE=4 SV=1;tr|G4V8M2|G4V8M2_SCHMA Uncharacterized protein OS=Schistosoma mansoni GN=Smp_019940.5 PE=4 SV=1;tr|G4V8M4|G4V8M4_SCHMA Uncharacterized protein OS=Schistosoma ma	2	40.527	-1.05295	16.637	16.6067	16.5027	16.5822	18.0262	17.8294	17.0497	17.6351
G4V8N2	tr|G4V8N2|G4V8N2_SCHMA Uncharacterized protein OS=Schistosoma mansoni GN=Smp_172800 PE=4 SV=1	4	39.309	0.333366	19.2294	18.0285	17.8046	18.3542	17.8983	18.1434		18.0208
G4V8N4	tr|G4V8N4|G4V8N4_SCHMA Peptidyl-prolyl cis-trans isomerase OS=Schistosoma mansoni GN=Smp_210750 PE=4 SV=1	4	15.148	-0.11374	20.1445	19.8599	19.2036	19.736	19.9375	20.0787	19.533	19.8497
G4V8N6	tr|G4V8N6|G4V8N6_SCHMA DNA-directed RNA polymerase III subunit RPC6 OS=Schistosoma mansoni GN=Smp_165980 PE=3 SV=1	3	34.31	1.03691	16.9842	17.016		17.0001	16.2369	16.2399	15.4127	15.9632
G4V8N7	tr|G4V8N7|G4V8N7_SCHMA Putative acidic fibroblast growth factor intracellular binding protein OS=Schistosoma mansoni GN=Smp_165970 PE=4 SV=1	2	94.791	M only				N/A	16.3748	14.3401	16.388	15.7009
G4V8P0	tr|G4V8P0|G4V8P0_SCHMA Dcp1 related OS=Schistosoma mansoni GN=Smp_165960 PE=4 SV=1	12	55.878	-1.03559	20.1581	19.8555	19.8508	19.9548	20.9283	21.3341	20.7087	20.9904
G4V8Q2	tr|G4V8Q2|G4V8Q2_SCHMA Uncharacterized protein OS=Schistosoma mansoni GN=Smp_131790 PE=4 SV=1	2	8.0832	0.622253	18.9446	20.544	20.1485	19.879	18.5012	20.2885	18.9805	19.2567
G4V8Q3;G4V8Q4	tr|G4V8Q3|G4V8Q3_SCHMA Putative developmentally regulated GTP-binding protein 1 (Drg 1) OS=Schistosoma mansoni GN=Smp_173180.2 PE=4 SV=1;tr|G4V8Q4|G4V8Q4_SCHMA Putative developmentally regulated GTP-binding protein 1 (Drg 1) OS=Schistosoma mansoni GN=Smp_1	13	46.257	0.715397	21.4013	21.518	21.3462	21.4218	20.5745	20.7223	20.8226	20.7064
G4V8Q5	tr|G4V8Q5|G4V8Q5_SCHMA Actin-related protein 10, arp10 OS=Schistosoma mansoni GN=Smp_093230 PE=3 SV=1	6	45.674	-0.60691	18.6022	17.7753	18.0842	18.1539	18.762	19.0673	18.4532	18.7608
G4V8Q6	tr|G4V8Q6|G4V8Q6_SCHMA Uncharacterized protein OS=Schistosoma mansoni GN=Smp_093220 PE=4 SV=1	15	74.223	0.0866247	20.0975	20.7932	20.3015	20.3974	20.4411	19.9824	20.5089	20.3108
G4V8Q8	tr|G4V8Q8|G4V8Q8_SCHMA Uncharacterized protein Smp_200410 OS=Schistosoma mansoni GN=Smp_200410 PE=3 SV=1	16	36.738	0.0830018	23.8972	23.7937	23.6887	23.7932	23.7092	23.8959	23.5255	23.7102
G4V8R1	tr|G4V8R1|G4V8R1_SCHMA Uncharacterized protein OS=Schistosoma mansoni GN=Smp_208090 PE=4 SV=1	3	91.022	4.08767	22.2348	17.9263	22.0809	20.7473	16.7658	16.4575	16.7557	16.6597
G4V8R2;G4V8R3	tr|G4V8R2|G4V8R2_SCHMA Uncharacterized protein OS=Schistosoma mansoni GN=Smp_024500.4 PE=4 SV=1;tr|G4V8R3|G4V8R3_SCHMA Uncharacterized protein OS=Schistosoma mansoni GN=Smp_024500.1 PE=4 SV=1	3	33.592	-0.828129	17.9452	16.4872	15.8431	16.7585	18.375	16.8731	17.5118	17.5866
G4V8R6	tr|G4V8R6|G4V8R6_SCHMA Family S9 non-peptidase homologue (S09 family) OS=Schistosoma mansoni GN=Smp_210830 PE=4 SV=1	3	11.837	0.545947	20.97	20.5528	20.0955	20.5394	19.9467	20.268	19.7657	19.9935
G4V8R7	tr|G4V8R7|G4V8R7_SCHMA Family S9 non-peptidase homologue (S09 family) OS=Schistosoma mansoni GN=Smp_210840 PE=4 SV=1	3	61.315	-0.261341	13.6885			13.6885	13.2156	14.0017	14.6323	13.9498
G4V8R9	tr|G4V8R9|G4V8R9_SCHMA Putative nucleolar protein family A member OS=Schistosoma mansoni GN=Smp_098330 PE=4 SV=1	2	16.706	1.00142	21.9741	21.6002	21.2146	21.5963	20.8602	20.9051	20.0193	20.5949
G4V8S1;G4V8S0	tr|G4V8S1|G4V8S1_SCHMA Non-specific serine/threonine protein kinase OS=Schistosoma mansoni GN=Smp_014170.1 PE=4 SV=1;tr|G4V8S0|G4V8S0_SCHMA Non-specific serine/threonine protein kinase OS=Schistosoma mansoni GN=Smp_014170.2 PE=4 SV=1	4	98.946	M only				N/A	13.8781	14.4056	15.3171	14.5336
G4V8T2;G4VB03	tr|G4V8T2|G4V8T2_SCHMA Uncharacterized protein OS=Schistosoma mansoni GN=Smp_014270 PE=4 SV=1;tr|G4VB03|G4VB03_SCHMA Uncharacterized protein OS=Schistosoma mansoni GN=Smp_007300 PE=4 SV=1	1	10.855	-0.788475	20.6012	16.9257	19.7071	19.078	19.9545	20.2493	19.3957	19.8665
G4V8U2;G4V8U3;G4V8U1	tr|G4V8U2|G4V8U2_SCHMA Uncharacterized protein OS=Schistosoma mansoni GN=Smp_097240.1 PE=3 SV=1;tr|G4V8U3|G4V8U3_SCHMA Uncharacterized protein OS=Schistosoma mansoni GN=Smp_097240.2 PE=3 SV=1;tr|G4V8U1|G4V8U1_SCHMA Uncharacterized protein OS=Schistosoma ma	10	34.423	0.368798	20.0603	20.6652	19.4292	20.0515	19.6341	19.796	19.6182	19.6827
G4V8U5	tr|G4V8U5|G4V8U5_SCHMA GTP-binding protein-related OS=Schistosoma mansoni GN=Smp_147850 PE=4 SV=1	7	81.406	0.184265	14.5715	14.3822	16.7892	15.2477		15.2605	14.8663	15.0634
G4V8U8	tr|G4V8U8|G4V8U8_SCHMA Uncharacterized protein OS=Schistosoma mansoni GN=Smp_147870 PE=3 SV=1	5	93.093	0.431488	16.7448	16.9102	17.2175	16.9575	16.6078	16.4442		16.526
G4V8U9	tr|G4V8U9|G4V8U9_SCHMA Uncharacterized protein OS=Schistosoma mansoni GN=Smp_147880 PE=4 SV=1	2	25.412	M only				N/A	18.5292	18.3489	17.1653	18.0145
G4V8V0	tr|G4V8V0|G4V8V0_SCHMA Putative rootletin (Ciliary rootlet coiled-coil protein) (Fragment) OS=Schistosoma mansoni GN=Smp_147890 PE=4 SV=1	37	223.26	-4.62643	14.6642	13.6567		14.1604	18.5099	19.1243	18.7264	18.7869
G4V8V4	tr|G4V8V4|G4V8V4_SCHMA Putative acyl-coenzyme A binding domain containing (Fragment) OS=Schistosoma mansoni GN=Smp_147930 PE=4 SV=1	3	27.661	1.5942	19.5019	18.7152	18.0945	18.7706	17.2679	17.7115	16.5496	17.1764
G4V8V7	tr|G4V8V7|G4V8V7_SCHMA Putative bromodomain-containing protein 3, brd3 OS=Schistosoma mansoni GN=Smp_147950 PE=4 SV=1	9	77.649	-0.131095	18.0956	18.1012	18.2227	18.1398	18.3879	18.3649	18.0601	18.2709
G4V8W2	tr|G4V8W2|G4V8W2_SCHMA Putative high-affinity copper uptake protein OS=Schistosoma mansoni GN=Smp_048230 PE=4 SV=1	2	22.516	-0.973013	18.5361	18.7067	18.5206	18.5878	18.6445	18.7617	21.2763	19.5608
G4V8W3	tr|G4V8W3|G4V8W3_SCHMA Putative mannose-1-phosphate guanyltransferase OS=Schistosoma mansoni GN=Smp_048240 PE=4 SV=1	7	51.475	-0.231585	17.2222	16.9703	18.2982	17.4969	17.8797	17.6313	17.6745	17.7285
G4V8W8;G4V8W9	tr|G4V8W8|G4V8W8_SCHMA Putative n-acetyltransferase OS=Schistosoma mansoni GN=Smp_048260.2 PE=4 SV=1;tr|G4V8W9|G4V8W9_SCHMA Putative n-acetyltransferase OS=Schistosoma mansoni GN=Smp_048260.1 PE=4 SV=1	6	24.472	1.1732	20.4608	20.5324	20.1182	20.3704	19.1998	19.1749	19.2171	19.1972
G4V8X7;P12812;A0A0R5RJC3;G4V8Y7	tr|G4V8X7|G4V8X7_SCHMA Putative heat shock protein-HSP20/alpha crystallin family OS=Schistosoma mansoni GN=Smp_049250 PE=3 SV=1;sp|P12812|P40_SCHMA Major egg antigen OS=Schistosoma mansoni PE=2 SV=1;tr|A0A0R5RJC3|A0A0R5RJC3_SCHMA Hsp20 (Fragment) OS=Schist	14	37.034	-1.63632	23.4574	23.5039	23.1972	23.3862	24.9366	25.257	24.8739	25.0225
G4V8X8	tr|G4V8X8|G4V8X8_SCHMA Putative heat shock protein hsp16 OS=Schistosoma mansoni GN=Smp_148530 PE=3 SV=1	23	77.835	-1.06142	21.6088	21.5605	21.2007	21.4567	22.5689	22.6795	22.3059	22.5181
G4V8X9	tr|G4V8X9|G4V8X9_SCHMA Putative heat shock protein OS=Schistosoma mansoni GN=Smp_049270 PE=3 SV=1	8	52.245	0.552998	20.4136	20.3284	19.9787	20.2402	19.6803	19.1395	20.2419	19.6872
G4V8Y1	tr|G4V8Y1|G4V8Y1_SCHMA Elongation factor Ts, mitochondrial OS=Schistosoma mansoni GN=Smp_148540 PE=3 SV=1	13	34.911	0.126707	20.5305	20.9111	20.737	20.7262	20.816	20.9355	20.0469	20.5995
G4V8Y8	tr|G4V8Y8|G4V8Y8_SCHMA Phosphatidate cytidylyltransferase, mitochondrial OS=Schistosoma mansoni GN=Smp_148560.1 PE=3 SV=1	11	42.954	-0.315004	19.9728	19.4367	19.7469	19.7188	20.426	19.3724	20.303	20.0338
G4V904	tr|G4V904|G4V904_SCHMA Putative atp-dependent transporter OS=Schistosoma mansoni GN=Smp_049500 PE=4 SV=1	9	81.9	1.37015	17.4652	18.6137	18.649	18.2426	18.0569	14.9287	17.6319	16.8725
G4V906;Q26544	tr|G4V906|G4V906_SCHMA Putative wd repeat protein SL1-17 OS=Schistosoma mansoni GN=Smp_049520 PE=4 SV=1;sp|Q26544|WSL17_SCHMA WD repeat-containing protein SL1-17 OS=Schistosoma mansoni PE=2 SV=1	11	32.998	-1.65478	19.1834	19.5339	20.4861	19.7345	21.2678	21.6207	21.2793	21.3892
G4V910	tr|G4V910|G4V910_SCHMA Putative heat shock protein 70 (Hsp70) OS=Schistosoma mansoni GN=Smp_049550 PE=3 SV=1	38	71.237	-0.679665	24.8395	24.7072	24.8757	24.8075	25.4198	25.7311	25.3106	25.4871
G4V912	tr|G4V912|G4V912_SCHMA Serine/threonine kinase OS=Schistosoma mansoni GN=Smp_148690 PE=4 SV=1	31	262.1	-3.80471	13.2373	12.4326	13.6149	13.0949	15.9541	15.2373	19.5075	16.8996
G4V913	tr|G4V913|G4V913_SCHMA Uncharacterized protein OS=Schistosoma mansoni GN=Smp_175570 PE=4 SV=1	5	24.801	0.00684791	20.8196	20.8302	21.0558	20.9018	20.9022	20.8522	20.9306	20.895
G4V916	tr|G4V916|G4V916_SCHMA Mitochondrial genome maintenance exonuclease 1 OS=Schistosoma mansoni GN=Smp_097280 PE=3 SV=1	7	29.558	2.05855	19.0201	18.953	18.7587	18.9106	16.6555	17.4844	16.4163	16.8521
G4V917	tr|G4V917|G4V917_SCHMA Ribosomal protein related OS=Schistosoma mansoni GN=Smp_102820 PE=4 SV=1	4	21.7	1.68886	19.0202	19.1065	19.5465	19.2244	17.7619	16.4541	18.3906	17.5356
G4V920	tr|G4V920|G4V920_SCHMA Putative mitochondrial ribosome protein OS=Schistosoma mansoni GN=Smp_034430.1 PE=4 SV=1	4	21.841	1.8461	18.7327	19.0297	18.4684	18.7436	16.9803	16.6792	17.033	16.8975
G4V924	tr|G4V924|G4V924_SCHMA Ferrochelatase OS=Schistosoma mansoni GN=Smp_140790 PE=3 SV=1	6	47.814	0.28726	18.8017	18.7364	18.6268	18.7216	18.6395	18.3995	18.2641	18.4344
G4V926	tr|G4V926|G4V926_SCHMA Proteasome catalytic subunit 1 (T01 family) OS=Schistosoma mansoni GN=Smp_034490 PE=4 SV=1	8	24.485	-0.00552368	22.5154	22.6786	22.3856	22.5265	22.6968	22.7436	22.1557	22.5321
G4V931;G4V930	tr|G4V931|G4V931_SCHMA Putative histone acetyltransferase type B catalytic subunit OS=Schistosoma mansoni GN=Smp_178700.1 PE=4 SV=1;tr|G4V930|G4V930_SCHMA Putative histone acetyltransferase type B catalytic subunit OS=Schistosoma mansoni GN=Smp_178700.2 PE	11	50.704	0.0404007	20.1204	20.2565	20.734	20.3703	20.4466	20.3175	20.2256	20.3299
G4V932	tr|G4V932|G4V932_SCHMA Putative lupus la ribonucleoprotein OS=Schistosoma mansoni GN=Smp_101820 PE=4 SV=1	20	110.21	3.84667	20.3319	20.1939	20.1982	20.2413	16.622	14.9494	17.6125	16.3947
G4V933	tr|G4V933|G4V933_SCHMA Hes-B related OS=Schistosoma mansoni GN=Smp_034530.1 PE=4 SV=1	2	15.537	F only	17.2942	17.5594	17.5873	17.4803				N/A
G4V935	tr|G4V935|G4V935_SCHMA Putative alpha-actinin OS=Schistosoma mansoni GN=Smp_034550 PE=4 SV=1	2	104.32	-0.632524	13.9053	15.1135	14.7107	14.5765	15.164	14.8596	15.6035	15.209
G4V946;G4V945	tr|G4V946|G4V946_SCHMA Uncharacterized protein OS=Schistosoma mansoni GN=Smp_140900.1 PE=4 SV=1;tr|G4V945|G4V945_SCHMA Uncharacterized protein OS=Schistosoma mansoni GN=Smp_140900.2 PE=4 SV=1	12	20.967	0.478595	23.5677	23.3903	23.1546	23.3708	22.5927	23.3525	22.7315	22.8923
G4V949	tr|G4V949|G4V949_SCHMA Tubulin gamma chain OS=Schistosoma mansoni GN=Smp_034670 PE=3 SV=1	16	55.091	0.650058	21.549	21.4202	21.2647	21.4113	20.6776	20.8045	20.8016	20.7612
G4V952;G4V953	tr|G4V952|G4V952_SCHMA Sco1-related OS=Schistosoma mansoni GN=Smp_034700.1 PE=4 SV=1;tr|G4V953|G4V953_SCHMA Sco1-related OS=Schistosoma mansoni GN=Smp_034700.3 PE=4 SV=1	6	26.812	0.028751	19.9507	20.1742	19.912	20.0123	19.8598	20.6408	19.45	19.9835
G4V955	tr|G4V955|G4V955_SCHMA Transcription factor mrg-related OS=Schistosoma mansoni GN=Smp_140950 PE=4 SV=1	4	51.708	-0.743003	18.3947	18.2845	16.5564	17.7452	18.6724	18.4907	18.3015	18.4882
G4V958	tr|G4V958|G4V958_SCHMA Putative phosphoglucomutase OS=Schistosoma mansoni GN=Smp_085150 PE=3 SV=1	15	63.799	-0.473689	18.9323	20.1315	20.3754	19.8131	20.5925	20.4334	19.8345	20.2868
G4V960	tr|G4V960|G4V960_SCHMA Uncharacterized protein OS=Schistosoma mansoni GN=Smp_168360 PE=4 SV=1	1	85.846	-0.565169	15.4729			15.4729	15.5875	16.3273	16.1993	16.038
G4V965	tr|G4V965|G4V965_SCHMA Putative poly(P)/ATP NAD kinase OS=Schistosoma mansoni GN=Smp_094870 PE=4 SV=1	1	31.824	-0.632933		16.3184		16.3184	16.9556	16.876	17.0225	16.9513
G4V966	tr|G4V966|G4V966_SCHMA Putative starch branching enzyme II OS=Schistosoma mansoni GN=Smp_094880 PE=4 SV=1	24	79.685	-1.08189	19.5998	20.6728	19.8237	20.0321	21.2565	20.8973	21.1881	21.114
G4V969;A9NI52	tr|G4V969|G4V969_SCHMA Putative 26s protease regulatory subunit OS=Schistosoma mansoni GN=Smp_012470 PE=3 SV=1;tr|A9NI52|A9NI52_SCHMA 26S proteasome subunit ATPase 2 (Fragment) OS=Schistosoma mansoni GN=RPT1 PE=2 SV=1	28	48.509	0.0573656	22.7868	22.301	22.2685	22.4521	22.4755	22.5361	22.1726	22.3947
G4V985;G4V984;G4V986;G4V983	tr|G4V985|G4V985_SCHMA Putative DNAj (Hsp40) homolog, subfamily C, member OS=Schistosoma mansoni GN=Smp_049600.4 PE=4 SV=1;tr|G4V984|G4V984_SCHMA Putative DNAj (Hsp40) homolog, subfamily C, member OS=Schistosoma mansoni GN=Smp_049600.2 PE=4 SV=1;tr|G4V986|	15	55.517	-0.601789	20.3519	20.0905	19.7887	20.077	20.5942	20.887	20.5552	20.6788
G4V9A3	tr|G4V9A3|G4V9A3_SCHMA Uncharacterized protein OS=Schistosoma mansoni GN=Smp_059810 PE=4 SV=1	3	25.01	0.786294	19.6304	19.6846	19.3687	19.5612	18.9843	18.2855	19.0551	18.7749
G4V9A5;G4V9A6	tr|G4V9A5|G4V9A5_SCHMA Transketolase OS=Schistosoma mansoni GN=Smp_059790.2 PE=4 SV=1;tr|G4V9A6|G4V9A6_SCHMA Transketolase OS=Schistosoma mansoni GN=Smp_059790.1 PE=4 SV=1	27	67.153	-0.81217	24.3877	24.7215	24.9661	24.6918	25.6047	25.7112	25.1959	25.5039
G4V9B1	tr|G4V9B1|G4V9B1_SCHMA Putative elongin B OS=Schistosoma mansoni GN=Smp_072380 PE=4 SV=1	8	13.655	-0.930126	21.2675	21.2887	21.6499	21.402	22.4268	22.6086	21.961	22.3322
G4V9B2	tr|G4V9B2|G4V9B2_SCHMA Putative tpr repeat nuclear phosphoprotein OS=Schistosoma mansoni GN=Smp_072370 PE=4 SV=1	4	125.12	-1.46881	13.5359		14.8409	14.1884	15.801	15.1307	16.0399	15.6572
G4V9B3	tr|G4V9B3|G4V9B3_SCHMA Uncharacterized protein OS=Schistosoma mansoni GN=Smp_072360 PE=4 SV=1	4	74.738	-1.46095	15.819	15.4433	15.8798	15.714	17.1678	16.7549	17.6024	17.175
G4V9B4	tr|G4V9B4|G4V9B4_SCHMA ATP synthase gamma-related OS=Schistosoma mansoni GN=Smp_072350 PE=4 SV=1	10	119.26	0.176043	17.9319	18.001	17.6339	17.8556	17.4937	17.9184	17.6265	17.6796
G4V9B5;A9NI60	tr|G4V9B5|G4V9B5_SCHMA Putative 26s protease regulatory subunit 6b OS=Schistosoma mansoni GN=Smp_072340 PE=3 SV=1;tr|A9NI60|A9NI60_SCHMA 26S proteasome subunit RPT3 (Fragment) OS=Schistosoma mansoni GN=RPT3 PE=2 SV=1	20	46.795	0.618764	22.7905	22.4543	22.391	22.5453	21.6785	22.2733	21.8278	21.9265
G4V9B9;Q26582	tr|G4V9B9|G4V9B9_SCHMA Putative heat shock protein OS=Schistosoma mansoni GN=Smp_072330.2 PE=3 SV=1;tr|Q26582|Q26582_SCHMA Heat shock protein 86 (Fragment) OS=Schistosoma mansoni PE=2 SV=1	67	82.174	-0.122259	28.0917	27.9675	28.0459	28.035	28.0593	28.3356	28.077	28.1573
G4V9C2	tr|G4V9C2|G4V9C2_SCHMA Putative rab15, 13, 10, 1, 35, 5, and OS=Schistosoma mansoni GN=Smp_210420 PE=4 SV=1	2	18.162	0.607889	18.2551	17.6804	17.2659	17.7338			17.1259	17.1259
G4V9C3	tr|G4V9C3|G4V9C3_SCHMA Putative rab15, 13, 10, 1, 35, 5, and OS=Schistosoma mansoni GN=Smp_210430 PE=4 SV=1	8	24.441	-1.01587	21.9744	22.2609	22.7635	22.3329	23.2344	23.5399	23.2721	23.3488
G4V9C8	tr|G4V9C8|G4V9C8_SCHMA Putative succinate semialdehyde dehydrogenase OS=Schistosoma mansoni GN=Smp_161350 PE=3 SV=1	4	59.616	-0.186931	17.5273	16.7112	17.0302	17.0896	17.2152	17.2683	17.3459	17.2765
G4V9E1	tr|G4V9E1|G4V9E1_SCHMA Putative immunoglobulin domain superfamily (Sensory guidance protein) OS=Schistosoma mansoni GN=Smp_172070 PE=4 SV=1	2	91.73	-0.967789		16.0882		16.0882	17.1095	17.1082	16.9503	17.056
G4V9E4	tr|G4V9E4|G4V9E4_SCHMA Glutamine synthetase OS=Schistosoma mansoni GN=Smp_091460 PE=3 SV=1	8	40.904	-1.28872	18.7757	19.7128	18.827	19.1052	20.9953	19.6349	20.5515	20.3939
G4V9G0	tr|G4V9G0|G4V9G0_SCHMA Aminomethyltransferase OS=Schistosoma mansoni GN=Smp_128980 PE=3 SV=1	3	40.946	-0.585188	17.2728	17.5601	18.1203	17.651	18.3532	17.9703	18.3851	18.2362
G4V9G1	tr|G4V9G1|G4V9G1_SCHMA Coronin OS=Schistosoma mansoni GN=Smp_012720 PE=3 SV=1	16	60.23	1.42027	22.1619	22.0506	22.0274	22.08	20.6863	21.0109	20.2819	20.6597
G4V9G2	tr|G4V9G2|G4V9G2_SCHMA Uncharacterized protein OS=Schistosoma mansoni GN=Smp_128990 PE=4 SV=1	1	80.09	1.24313	19.7425	18.8652	19.6311	19.413	18.477	17.0944	18.9381	18.1698
G4V9G5	tr|G4V9G5|G4V9G5_SCHMA Putative 60s ribosomal protein L12 OS=Schistosoma mansoni GN=Smp_012750 PE=3 SV=1	6	17.73	1.07367	25.2983	25.3179	24.9436	25.1866	24.1821	24.1003	24.0563	24.1129
G4V9G7	tr|G4V9G7|G4V9G7_SCHMA Putative sarm1 OS=Schistosoma mansoni GN=Smp_012780 PE=4 SV=1	3	136.48	M only				N/A	13.8709	15.5517	15.3194	14.914
G4V9G9	tr|G4V9G9|G4V9G9_SCHMA Uncharacterized protein OS=Schistosoma mansoni GN=Smp_012800 PE=4 SV=1	3	10.231	0.344351	22.4707	21.9474	21.9508	22.123	21.6977	21.765	21.8732	21.7786
G4V9H0	tr|G4V9H0|G4V9H0_SCHMA Putative four and A half lim domains OS=Schistosoma mansoni GN=Smp_012810 PE=4 SV=1	7	13.63	1.92145	21.9319	22.5094	21.5927	22.0114	20.3536	19.5647	20.3514	20.0899
G4V9I2	tr|G4V9I2|G4V9I2_SCHMA Putative fuse-binding protein-interacting repressor siahbp1 OS=Schistosoma mansoni GN=Smp_012900 PE=4 SV=1	12	56.244	0.187675	20.8298	20.9729	21.0632	20.9553	20.8075	21.367	20.1284	20.7676
G4V9I3	tr|G4V9I3|G4V9I3_SCHMA Uncharacterized protein OS=Schistosoma mansoni GN=Smp_129080 PE=4 SV=1	3	12.764	-0.034204	21.2972	21.899	21.9314	21.7092	21.8524	21.4552	21.9225	21.7434
G4V9I5	tr|G4V9I5|G4V9I5_SCHMA Inosine-5-monophosphate dehydrogenase OS=Schistosoma mansoni GN=Smp_012930 PE=3 SV=1	24	55.062	0.0307977	22.0141	22.3619	22.176	22.184	21.9956	22.2762	22.1878	22.1532
G4V9J6	tr|G4V9J6|G4V9J6_SCHMA Uncharacterized protein OS=Schistosoma mansoni GN=Smp_161030 PE=4 SV=1	9	30.57	-3.66161	15.0518	18.5175	18.5332	17.3675	21.017	20.8382	21.2321	21.0291
G4V9J7	tr|G4V9J7|G4V9J7_SCHMA Uncharacterized protein OS=Schistosoma mansoni GN=Smp_071520 PE=4 SV=1	7	9.5759	M only				N/A	21.6176	21.729	22.1186	21.8217
G4V9L3	tr|G4V9L3|G4V9L3_SCHMA Putative shc transforming protein OS=Schistosoma mansoni GN=Smp_172110 PE=3 SV=1	15	40.227	-0.899859	24.1064	24.0294	24.0568	24.0642	25.0095	25.1889	24.6938	24.964
G4V9L6	tr|G4V9L6|G4V9L6_SCHMA Uncharacterized protein OS=Schistosoma mansoni GN=Smp_172140 PE=4 SV=1	2	58.009	M only				N/A	16.4709	16.5589	16.2732	16.4343
G4V9L7	tr|G4V9L7|G4V9L7_SCHMA Putative atp-dependent RNA helicase OS=Schistosoma mansoni GN=Smp_172150 PE=4 SV=1	16	171.13	-5.17371	13.0115	12.2863	13.2255	12.8411	18.0451	17.736	18.2633	18.0148
G4V9L8	tr|G4V9L8|G4V9L8_SCHMA Senescence downregulated leo1-like OS=Schistosoma mansoni GN=Smp_172160 PE=4 SV=1	6	53.497	0.639208	19.1908	18.9658	18.6883	18.9483	18.3642	18.4119	18.1513	18.3091
G4V9M0	tr|G4V9M0|G4V9M0_SCHMA Phosphate transporter OS=Schistosoma mansoni GN=Smp_094660 PE=3 SV=1	1	54.113	0.0373	15.3458	15.6908	16.1427	15.7264	15.862	15.2427	15.9627	15.6891
G4V9M3	tr|G4V9M3|G4V9M3_SCHMA Putative heat shock protein 70 (Hsp70) OS=Schistosoma mansoni GN=Smp_094680 PE=3 SV=1	1	22.197	-0.178614	19.7481	18.8258	19.1617	19.2452	19.0523	19.8333	19.3859	19.4238
G4V9N5	tr|G4V9N5|G4V9N5_SCHMA S-adenosylmethionine-dependent methyltransferase related OS=Schistosoma mansoni GN=Smp_154780 PE=4 SV=1	6	73.858	-0.998785			16.4025	16.4025	17.7718	16.7244	17.7076	17.4013
G4V9N7	tr|G4V9N7|G4V9N7_SCHMA Egf-like domain protein OS=Schistosoma mansoni GN=Smp_154760 PE=4 SV=1	11	198.16	-1.30233	17.7923	17.8358	18.1195	17.9159	19.5563	19.1875	18.9108	19.2182
G4V9N9	tr|G4V9N9|G4V9N9_SCHMA Putative nucleotide binding protein 2 (Nbp 2) OS=Schistosoma mansoni GN=Smp_210380 PE=4 SV=1	3	17.136	0.282561	18.0917	18.6062	18.4621	18.3867	19.0287	18.925	16.3587	18.1041
G4V9P0	tr|G4V9P0|G4V9P0_SCHMA Putative nucleotide binding protein 2 (Nbp 2) OS=Schistosoma mansoni GN=Smp_210390 PE=4 SV=1	2	30.494	1.23168	18.6524	18.6046	17.7036	18.3202	18.1016	15.2308	17.9332	17.0885
G4V9P7	tr|G4V9P7|G4V9P7_SCHMA Putative fms interacting protein OS=Schistosoma mansoni GN=Smp_067250.1 PE=4 SV=1	7	84.782	0.0227872	18.0374	17.3982	17.8069	17.7475	17.1519	18.0187	18.0035	17.7247
G4V9P8	tr|G4V9P8|G4V9P8_SCHMA DNA polymerase alpha subunit B OS=Schistosoma mansoni GN=Smp_067260 PE=3 SV=1	12	68.731	0.3011	20.076	20.1204	19.6257	19.9407	19.8733	20.0108	19.0348	19.6396
G4V9Q0	tr|G4V9Q0|G4V9Q0_SCHMA Putative dynamin OS=Schistosoma mansoni GN=Smp_067280 PE=3 SV=1	20	77.096	0.317692	20.1776	20.0404	20.0068	20.0749	19.971	19.5471	19.7535	19.7572
G4V9R0;G4V9R1	tr|G4V9R0|G4V9R0_SCHMA Putative dead box ATP-dependent RNA helicase OS=Schistosoma mansoni GN=Smp_093690.1 PE=3 SV=1;tr|G4V9R1|G4V9R1_SCHMA Putative dead box ATP-dependent RNA helicase OS=Schistosoma mansoni GN=Smp_093690.2 PE=3 SV=1	20	83.291	0.802188	18.3803	19.0206	19.2139	18.8716	18.1628	16.5346	19.5108	18.0694
G4V9R2	tr|G4V9R2|G4V9R2_SCHMA Putative membrane associated progesterone receptor OS=Schistosoma mansoni GN=Smp_093700 PE=3 SV=1	3	21.428	0.496036	19.5362	19.4537	18.9413	19.3104	19.1416	18.7393	18.5622	18.8144
G4V9R9	tr|G4V9R9|G4V9R9_SCHMA Putative glutamyl-tRNA synthetase 1, 2, 3 (Glutamate--tRNA ligase 1, 2, 3) OS=Schistosoma mansoni GN=Smp_009520 PE=3 SV=1	4	66.788	0.853054	16.9004	16.9815	17.2072	17.0297	17.1136	14.2157	17.2007	16.1766
G4V9S3	tr|G4V9S3|G4V9S3_SCHMA Putative membrane traffic protein OS=Schistosoma mansoni GN=Smp_140490 PE=4 SV=1	5	56.112	-0.27132	19.4911	19.2865	19.3059	19.3612	19.41	20.0768	19.4107	19.6325
G4V9S4	tr|G4V9S4|G4V9S4_SCHMA Putative paramyosin (Allergen Blo t 11) OS=Schistosoma mansoni GN=Smp_140500 PE=4 SV=1	3	97.056	M only				N/A	14.8461	15.0212	13.9378	14.6017
G4V9S7;G4V9S6;Q6UEH7	tr|G4V9S7|G4V9S7_SCHMA Putative smad4 OS=Schistosoma mansoni GN=Smp_033950.1 PE=4 SV=1;tr|G4V9S6|G4V9S6_SCHMA Putative smad4 OS=Schistosoma mansoni GN=Smp_033950.3 PE=4 SV=1;tr|Q6UEH7|Q6UEH7_SCHMA Mothers against decapentaplegic homolog OS=Schistosoma mans	1	47.891	-0.330354	17.0541	16.9997	16.872	16.9753	17.3738	17.6223	16.9207	17.3056
G4V9T2	tr|G4V9T2|G4V9T2_SCHMA Putative flotillin-2 OS=Schistosoma mansoni GN=Smp_033970 PE=4 SV=1	7	50.123	-2.34268	14.4714	17.0043	17.4138	16.2965	18.8234	18.7526	18.3415	18.6392
G4V9T3	tr|G4V9T3|G4V9T3_SCHMA Putative replication factor C / DNA polymerase III gamma-tau subunit OS=Schistosoma mansoni GN=Smp_140530 PE=4 SV=1	8	52.335	0.960054	18.6509	19.3133	19.2716	19.0786	18.2058	18.5286	17.6213	18.1186
G4V9U0	tr|G4V9U0|G4V9U0_SCHMA Putative 39s ribosomal protein L35, mitochondrial OS=Schistosoma mansoni GN=Smp_140550 PE=4 SV=1	4	19.833	1.96559	18.1918	18.31	18.6279	18.3766	16.0823	16.1839	16.9668	16.411
G4V9U9	tr|G4V9U9|G4V9U9_SCHMA Putative major vault protein OS=Schistosoma mansoni GN=Smp_006740 PE=4 SV=1	35	97.253	-1.54854	19.8088	20.4681	20.9607	20.4125	21.8428	22.0757	21.9648	21.9611
G4V9V3;G4V9V4	tr|G4V9V3|G4V9V3_SCHMA Putative synaptobrevin OS=Schistosoma mansoni GN=Smp_006720.1 PE=4 SV=1;tr|G4V9V4|G4V9V4_SCHMA Putative synaptobrevin OS=Schistosoma mansoni GN=Smp_006720.2 PE=4 SV=1	3	9.2153	0.517138	19.5724	19.4019	19.0548	19.343	18.3318	19.3282	18.8177	18.8259
G4V9V5	tr|G4V9V5|G4V9V5_SCHMA Endonuclease III homolog OS=Schistosoma mansoni GN=NTH1 PE=3 SV=1	6	29.892	0.176882	19.1324	16.9464	17.7553	17.9447	17.0557	17.6799	18.5679	17.7678
G4V9W3	tr|G4V9W3|G4V9W3_SCHMA Uncharacterized protein OS=Schistosoma mansoni GN=Smp_125800 PE=4 SV=1	13	49.342	-0.245013	19.6629	19.6371	19.364	19.5547	19.7733	19.979	19.6467	19.7997
G4V9W6	tr|G4V9W6|G4V9W6_SCHMA Actin-related protein 5, arp5 OS=Schistosoma mansoni GN=Smp_125790 PE=3 SV=1	3	103.96	1.48094	16.1997	17.2694	16.4732	16.6474	14.8325	15.1379	15.5291	15.1665
G4V9X0;G4V9W9	tr|G4V9X0|G4V9X0_SCHMA Putative scythe/bat3 OS=Schistosoma mansoni GN=Smp_125770.2 PE=4 SV=1;tr|G4V9W9|G4V9W9_SCHMA Putative scythe/bat3 OS=Schistosoma mansoni GN=Smp_125770.1 PE=4 SV=1	17	141.96	-0.00262043	18.5852	19.132	19.1433	18.9535	18.9779	18.1242	19.7662	18.9561
G4V9X4	tr|G4V9X4|G4V9X4_SCHMA Uncharacterized protein OS=Schistosoma mansoni GN=Smp_006560 PE=4 SV=1	7	20.255	0.693335	22.1218	21.9581	21.9466	22.0088	21.5062	21.5637	20.8767	21.3155
G4V9X6	tr|G4V9X6|G4V9X6_SCHMA Putative glutaredoxin, grx OS=Schistosoma mansoni GN=Smp_006550.1 PE=4 SV=1	13	23.978	-0.174537	21.854	22.1392	22.1247	22.0393	22.3481	22.3662	21.9272	22.2138
G4V9Y0	tr|G4V9Y0|G4V9Y0_SCHMA Putative pyruvate dehydrogenase OS=Schistosoma mansoni GN=Smp_068170.1 PE=4 SV=1	5	44.006	-1.6476	16.3629	16.4045	17.5031	16.7568	18.3999	18.1683	18.6449	18.4044
G4V9Y3	tr|G4V9Y3|G4V9Y3_SCHMA Putative transmembrane transport protein OS=Schistosoma mansoni GN=Smp_072950 PE=3 SV=1	9	24.537	0.66709	22.9234	22.6343	22.4177	22.6585	21.7395	22.1689	22.0657	21.9914
G4V9Z1	tr|G4V9Z1|G4V9Z1_SCHMA Putative short-chain dehydrogenase/reductase OS=Schistosoma mansoni GN=Smp_078600 PE=4 SV=1	3	37.064	-1.34095	16.2519	15.5531	16.0742	15.9598	17.5489	16.3517	18.0015	17.3007
G4V9Z2	tr|G4V9Z2|G4V9Z2_SCHMA Putative rna binding motif protein 25 OS=Schistosoma mansoni GN=Smp_078610 PE=4 SV=1	8	79.363	0.673448	19.0093	18.7306	19.0115	18.9172	17.2969	18.8908	18.5434	18.2437
G4V9Z3	tr|G4V9Z3|G4V9Z3_SCHMA Putative snrnp sm protein OS=Schistosoma mansoni GN=Smp_078640 PE=4 SV=1	3	11.986	0.0485795	21.7593	21.2342	21.1421	21.3785	21.3025	21.1489	21.5384	21.3299
G4VA00	tr|G4VA00|G4VA00_SCHMA Irx-related OS=Schistosoma mansoni GN=Smp_063520 PE=4 SV=1	4	60.482	4.15128	18.4407	18.1999	18.754	18.4649	14.3136			14.3136
G4VA01;G4VA02	tr|G4VA01|G4VA01_SCHMA Ferritin OS=Schistosoma mansoni GN=Smp_063530.1 PE=3 SV=1;tr|G4VA02|G4VA02_SCHMA Ferritin OS=Schistosoma mansoni GN=Smp_063530.2 PE=3 SV=1	2	22.286	-0.847147	17.2361	16.9562	17.0362	17.0762	18.2372	17.8719	17.6609	17.9233
G4VA05	tr|G4VA05|G4VA05_SCHMA Uncharacterized protein OS=Schistosoma mansoni GN=Smp_063560 PE=4 SV=1	10	43.72	-1.87477	17.1032	17.8608	20.046	18.3367	20.2557	19.9347	20.444	20.2114
G4VA11	tr|G4VA11|G4VA11_SCHMA Uncharacterized protein OS=Schistosoma mansoni GN=Smp_063630 PE=4 SV=1	4	24.635	M only				N/A	19.6444	19.7606	18.8503	19.4184
G4VA12	tr|G4VA12|G4VA12_SCHMA Putative g-protein, beta subunit OS=Schistosoma mansoni GN=Smp_063640 PE=4 SV=1	5	37.512	-1.33636	19.6544	20.2549	20.1257	20.0116	21.2657	21.541	21.2373	21.348
G4VA14;G4VA13	tr|G4VA14|G4VA14_SCHMA Putative transcription initiation factor IIB (TFIIB) OS=Schistosoma mansoni GN=Smp_063650.3 PE=4 SV=1;tr|G4VA13|G4VA13_SCHMA Putative transcription initiation factor iib OS=Schistosoma mansoni GN=Smp_063650.4 PE=4 SV=1	5	31.586	1.48614	18.8067	18.6632	18.0701	18.5133		16.5618	17.4927	17.0272
G4VA17	tr|G4VA17|G4VA17_SCHMA Uncharacterized protein OS=Schistosoma mansoni GN=Smp_063670 PE=4 SV=1	4	36.581	1.17485	17.509	17.0556	17.048	17.2042	16.6277	16.1215	15.3387	16.0293
G4VA20	tr|G4VA20|G4VA20_SCHMA Uncharacterized protein OS=Schistosoma mansoni GN=Smp_156460 PE=4 SV=1	2	32.662	2.5261	18.7706	18.3634	18.6001	18.5781	14.1098	17.0124	17.0336	16.052
G4VA23;B8YCP4	tr|G4VA23|G4VA23_SCHMA Putative 22.6kDa tegument-associated antigen OS=Schistosoma mansoni GN=Smp_086470 PE=4 SV=1;tr|B8YCP4|B8YCP4_SCHMA Tegument-associated antigen OS=Schistosoma mansoni PE=2 SV=1	5	21.624	0.562334	19.2583	19.7781	18.5559	19.1974	19.0995	19.3272	17.4786	18.6351
G4VA33	tr|G4VA33|G4VA33_SCHMA Putative eukaryotic translation initiation factor 3 subunit (Eif-3) OS=Schistosoma mansoni GN=Smp_161480 PE=4 SV=1	19	118.97	0.769601	18.2241	19.0279	19.3278	18.8599	17.8286	17.8208	18.6216	18.0903
G4VA35	tr|G4VA35|G4VA35_SCHMA Putative eukaryotic translation initiation factor 3 subunit (Eif-3) OS=Schistosoma mansoni GN=Smp_188700 PE=4 SV=1	4	28.845	2.01287	18.3688	19.0673	19.4931	18.9764	15.0272		18.8998	16.9635
G4VA38	tr|G4VA38|G4VA38_SCHMA Uncharacterized protein OS=Schistosoma mansoni GN=Smp_072560 PE=4 SV=1	5	77.414	-1.8516			13.9931	13.9931	14.5539	16.3534	16.6267	15.8447
G4VA50	tr|G4VA50|G4VA50_SCHMA Putative tetratricopeptide protein OS=Schistosoma mansoni GN=Smp_072970 PE=4 SV=1	6	27.507	0.401779	20.0826	20.1554	19.8412	20.0264	19.8697	19.6636	19.3406	19.6246
G4VA51	tr|G4VA51|G4VA51_SCHMA Putative eukaryotic elongation factor 2 kinase (Eef-2 kinase) OS=Schistosoma mansoni GN=Smp_072980 PE=4 SV=1	10	93.477	3.44389	18.4038	18.5	18.6257	18.5098	15.7065		14.4254	15.0659
G4VA67;G4VA66	tr|G4VA67|G4VA67_SCHMA Uncharacterized protein OS=Schistosoma mansoni GN=Smp_073080.1 PE=4 SV=1;tr|G4VA66|G4VA66_SCHMA Putative rrna processing protein (Rrp20) OS=Schistosoma mansoni GN=Smp_073080.2 PE=4 SV=1	3	16.79	2.3293	18.7121	18.0226	19.1859	18.6402	16.0089		16.6129	16.3109
G4VA72	tr|G4VA72|G4VA72_SCHMA Putative vacuolar protein sorting 26, vps26 OS=Schistosoma mansoni GN=Smp_210770 PE=4 SV=1	9	56.402	-1.46889	15.3517	17.4989	15.5925	16.1477	17.5029	17.7111	17.6358	17.6166
G4VA73	tr|G4VA73|G4VA73_SCHMA Putative vacuolar protein sorting 26, vps26 OS=Schistosoma mansoni GN=Smp_210780 PE=4 SV=1	17	92.712	-1.1819	18.9427	19.3049	18.9015	19.0497	20.3611	20.3913	19.9424	20.2316
G4VA77;G4VA76	tr|G4VA77|G4VA77_SCHMA Uncharacterized protein OS=Schistosoma mansoni GN=Smp_161790.1 PE=4 SV=1;tr|G4VA76|G4VA76_SCHMA Uncharacterized protein OS=Schistosoma mansoni GN=Smp_161790.2 PE=4 SV=1	8	47.681	0.284148	18.4876	19.2884	18.0726	18.6162	17.9702	17.636	19.39	18.3321
G4VA81	tr|G4VA81|G4VA81_SCHMA Putative adp-ribosylation factor interacting protein OS=Schistosoma mansoni GN=Smp_073210 PE=4 SV=1	8	38.741	0.774616	19.7525	19.9992	19.6758	19.8092	18.8494	18.772	19.4823	19.0346
G4VA89	tr|G4VA89|G4VA89_SCHMA Uncharacterized protein OS=Schistosoma mansoni GN=Smp_073290 PE=4 SV=1	3	72.384	0.619689	17.8373		16.8609	17.3491	17.3195	18.1794	14.6894	16.7294
G4VA90	tr|G4VA90|G4VA90_SCHMA Uncharacterized protein OS=Schistosoma mansoni GN=Smp_073300 PE=4 SV=1	9	53.16	0.00987123	19.3328	18.6129	18.7825	18.9094	18.8401	18.6381	19.2204	18.8995
G4VA93	tr|G4VA93|G4VA93_SCHMA Uncharacterized protein OS=Schistosoma mansoni GN=Smp_196960 PE=4 SV=1	5	35.579	-0.215765	15.1859	15.6641	17.1643	16.0048	15.2541		17.187	16.2205
G4VA94	tr|G4VA94|G4VA94_SCHMA Putative intermembrane space import and assembly protein 40, mitochondrial (Mitochondrial import inner membrane translocase TIM40) OS=Schistosoma mansoni GN=Smp_062830.1 PE=4 SV=1	4	15.055	0.921836	20.7191	20.3527	20.3536	20.4751	19.8012	18.6678	20.1908	19.5533
G4VA96	tr|G4VA96|G4VA96_SCHMA GrpE protein homolog OS=Schistosoma mansoni GN=Smp_062790 PE=3 SV=1	6	25.042	1.64139	21.4633	21.3052	21.3372	21.3686	19.6359	19.7594	19.7862	19.7272
G4VA98;G4VA97	tr|G4VA98|G4VA98_SCHMA Putative oxysterol-binding protein OS=Schistosoma mansoni GN=Smp_156000.1 PE=4 SV=1;tr|G4VA97|G4VA97_SCHMA Putative oxysterol binding protein 9 OS=Schistosoma mansoni GN=Smp_156000.2 PE=4 SV=1	5	52.241	0.61279	17.4106	17.2865	16.8861	17.1944	17.5811	14.7196	17.4441	16.5816
G4VAA5;G4VAA6	tr|G4VAA5|G4VAA5_SCHMA Putative cysteinyl-tRNA synthetase OS=Schistosoma mansoni GN=Smp_170800.1 PE=3 SV=1;tr|G4VAA6|G4VAA6_SCHMA Putative cysteinyl-tRNA synthetase OS=Schistosoma mansoni GN=Smp_170800.2 PE=3 SV=1	30	92.476	0.780178	21.4578	21.4778	21.3926	21.4427	20.6635	20.7069	20.6171	20.6625
G4VAA7	tr|G4VAA7|G4VAA7_SCHMA Ubiquitin-specific peptidase 7 (C19 family) OS=Schistosoma mansoni GN=Smp_089180 PE=3 SV=1	44	156.44	0.00478886	21.0928	21.3895	21.4364	21.3062	21.1287	21.3335	21.4422	21.3014
G4VAB0	tr|G4VAB0|G4VAB0_SCHMA Putative multidrug resistance protein 1, 2, 3 (P glycoprotein 1, 2, 3) OS=Schistosoma mansoni GN=Smp_089200 PE=4 SV=1	1	117.24	M only				N/A	13.2791	13.9917	13.2405	13.5038
G4VAB2	tr|G4VAB2|G4VAB2_SCHMA Uncharacterized protein OS=Schistosoma mansoni GN=Smp_089220 PE=4 SV=1	5	26.702	0.0907071	19.7915	19.5149	19.0239	19.4434	20.2767	19.7812	18.0004	19.3527
G4VAD0	tr|G4VAD0|G4VAD0_SCHMA Putative zinc finger protein OS=Schistosoma mansoni GN=Smp_099900 PE=4 SV=1	9	45.307	0.512679	20.4846	19.8865	19.8152	20.0621	19.5449	19.1767	19.9266	19.5494
G4VAD1	tr|G4VAD1|G4VAD1_SCHMA Receptor expression-enhancing protein OS=Schistosoma mansoni GN=Smp_099890 PE=3 SV=1	8	21.422	-0.248638	22.2108	22.4579	22.0838	22.2508	22.4259	22.3154	22.7572	22.4995
G4VAD2	tr|G4VAD2|G4VAD2_SCHMA Elongation factor 1-alpha OS=Schistosoma mansoni GN=Smp_099870 PE=3 SV=1	39	50.98	0.106081	26.9947	27.2762	27.6358	27.3022	27.114	27.4174	27.057	27.1961
G4VAE7	tr|G4VAE7|G4VAE7_SCHMA Putative ef-hand domain (C-terminal) containing protein OS=Schistosoma mansoni GN=Smp_159160 PE=4 SV=1	7	70.606	M only				N/A	18.0795	18.0732	17.9031	18.0186
G4VAF7;G4VAF6;G4VAF8	tr|G4VAF7|G4VAF7_SCHMA Putative tumor protein d52 OS=Schistosoma mansoni GN=Smp_065470.2 PE=4 SV=1;tr|G4VAF6|G4VAF6_SCHMA Putative tumor protein d52 OS=Schistosoma mansoni GN=Smp_065470.3 PE=4 SV=1;tr|G4VAF8|G4VAF8_SCHMA Putative tumor protein d52 OS=Schis	7	18.337	-0.120826	22.7725	22.6541	22.3024	22.5763	22.8577	22.9819	22.2519	22.6972
G4VAG2	tr|G4VAG2|G4VAG2_SCHMA Calpain (C02 family) OS=Schistosoma mansoni GN=Smp_157500 PE=3 SV=1	10	172.93	-2.63009	13.6323	15.6428	15.1495	14.8082	17.7234	17.1433	17.4482	17.4383
G4VAG6;G4VAG8;G4VAG7;G4VAG9;G4VAH0	tr|G4VAG6|G4VAG6_SCHMA Putative heterogeneous nuclear ribonucleoprotein k OS=Schistosoma mansoni GN=Smp_065580.5 PE=4 SV=1;tr|G4VAG8|G4VAG8_SCHMA Putative heterogeneous nuclear ribonucleoprotein k OS=Schistosoma mansoni GN=Smp_065580.1 PE=4 SV=1;tr|G4VAG7|	6	33.92	0.408415	21.091	20.6387	20.0439	20.5912	20.3779	20.5244	19.646	20.1828
G4VAI0;G4VAH9	tr|G4VAI0|G4VAI0_SCHMA Pyruvate kinase OS=Schistosoma mansoni GN=Smp_065610.1 PE=3 SV=1;tr|G4VAH9|G4VAH9_SCHMA Pyruvate kinase OS=Schistosoma mansoni GN=Smp_065610.2 PE=3 SV=1	34	54.784	-0.468695	23.1709	23.7517	23.8616	23.5947	23.9376	24.002	24.2506	24.0634
G4VAI6	tr|G4VAI6|G4VAI6_SCHMA Uncharacterized protein OS=Schistosoma mansoni GN=Smp_157590 PE=4 SV=1	8	119.8	M only				N/A	17.0228	15.2231	17.1909	16.4789
G4VAJ8	tr|G4VAJ8|G4VAJ8_SCHMA Protein kinase OS=Schistosoma mansoni GN=Smp_154440 PE=3 SV=1	24	364.57	-1.30088	17.0642	16.9925	17.0152	17.024	18.1813	18.3655	18.4278	18.3249
G4VAJ9	tr|G4VAJ9|G4VAJ9_SCHMA 40S ribosomal protein S12 OS=Schistosoma mansoni GN=Smp_060090.1 PE=3 SV=1	8	14.591	1.01761	24.4449	24.6071	23.9145	24.3222	22.972	23.4424	23.4992	23.3046
G4VAK1	tr|G4VAK1|G4VAK1_SCHMA Putative septin OS=Schistosoma mansoni GN=Smp_060070 PE=2 SV=1	4	56.892	-0.0172897	16.8957	17.2747	17.5342	17.2349	17.9019	16.895	16.9595	17.2521
G4VAK2	tr|G4VAK2|G4VAK2_SCHMA Putative clathrin heavy chain OS=Schistosoma mansoni GN=Smp_191010 PE=4 SV=1	12	35.318	-0.910884	20.2592	21.0416	21.8369	21.0459	21.8071	22.1371	21.9261	21.9568
G4VAK4;G4VAK3	tr|G4VAK4|G4VAK4_SCHMA Clathrin heavy chain OS=Schistosoma mansoni GN=Smp_154420.1 PE=3 SV=1;tr|G4VAK3|G4VAK3_SCHMA Putative clathrin heavy chain OS=Schistosoma mansoni GN=Smp_154420.2 PE=4 SV=1	48	153.11	-0.654526	20.006	20.6399	21.347	20.6643	21.1986	21.5101	21.2477	21.3188
G4VAK6	tr|G4VAK6|G4VAK6_SCHMA Putative ubx domain containing protein OS=Schistosoma mansoni GN=Smp_060010 PE=4 SV=1	11	43.208	0.280943	21.3848	20.9132	20.9837	21.0939	21.0889	21.3277	20.0222	20.8129
G4VAL0;G4VAL1;G4VAK9	tr|G4VAL0|G4VAL0_SCHMA Uncharacterized protein OS=Schistosoma mansoni GN=Smp_120920.2 PE=4 SV=1;tr|G4VAL1|G4VAL1_SCHMA Uncharacterized protein OS=Schistosoma mansoni GN=Smp_120920.1 PE=4 SV=1;tr|G4VAK9|G4VAK9_SCHMA Uncharacterized protein OS=Schistosoma ma	2	69.469	M only				N/A	15.3037	16.0549	15.1474	15.502
G4VAL2	tr|G4VAL2|G4VAL2_SCHMA Putative leucyl-tRNA synthetase OS=Schistosoma mansoni GN=Smp_194160 PE=3 SV=1	40	134.65	0.467895	20.6742	21.1361	21.0713	20.9605	20.5147	20.3353	20.628	20.4926
G4VAL3	tr|G4VAL3|G4VAL3_SCHMA Putative sodium/potassium-transporting ATPase subunit beta (Sodium/potassium-dependent ATPase beta subunit) OS=Schistosoma mansoni GN=Smp_033550 PE=4 SV=1	4	23.548	-1.13548	18.7405	20.0954	19.3367	19.3909	20.6687	20.232	20.6784	20.5264
G4VAL5	tr|G4VAL5|G4VAL5_SCHMA Putative ubiquitin--protein ligase edd OS=Schistosoma mansoni GN=Smp_150360 PE=4 SV=1	23	357.47	0.902067	16.4483	17.0124	17.2175	16.8928	15.7839	15.1534	17.0349	15.9907
G4VAM3	tr|G4VAM3|G4VAM3_SCHMA Putative tubulin-specific chaperone E OS=Schistosoma mansoni GN=Smp_150440 PE=4 SV=1	4	66.907	0.856309	16.8504	17.0107	16.3295	16.7302	15.4541	16.7358	15.4317	15.8739
G4VAM6	tr|G4VAM6|G4VAM6_SCHMA Glucose-6-phosphate 1-dehydrogenase OS=Schistosoma mansoni GN=Smp_052810 PE=3 SV=1	20	47.348	-0.737079	21.416	21.5657	21.3798	21.4538	22.1533	22.2634	22.156	22.1909
G4VAP0	tr|G4VAP0|G4VAP0_SCHMA Putative ubiquitin protein ligase E3a (Fragment) OS=Schistosoma mansoni GN=Smp_172420 PE=4 SV=1	4	343.88	-0.427524	14.2306	14.3839	14.2139	14.2761	15.2063	13.3369	15.5678	14.7037
G4VAP5	tr|G4VAP5|G4VAP5_SCHMA Putative testis development protein nyd-sp29 OS=Schistosoma mansoni GN=Smp_136210 PE=4 SV=1	7	120.07	-0.57213	17.1399	17.361	17.3829	17.2946	17.7253	17.8957	17.9792	17.8667
G4VAQ2	tr|G4VAQ2|G4VAQ2_SCHMA Uncharacterized protein OS=Schistosoma mansoni GN=Smp_025860 PE=4 SV=1	9	9.0752	-0.912064	24.1217	24.0912	23.8943	24.0357	25.2071	25.1676	24.4687	24.9478
G4VAQ5	tr|G4VAQ5|G4VAQ5_SCHMA Uncharacterized protein OS=Schistosoma mansoni GN=Smp_136140 PE=4 SV=1	3	60.779	-0.296237	15.2407		15.9592	15.6	15.8523	16.1574	15.6789	15.8962
G4VAQ6	tr|G4VAQ6|G4VAQ6_SCHMA Proteasome subunit beta type OS=Schistosoma mansoni GN=Smp_025800 PE=3 SV=1	11	23.157	0.146089	23.3972	23.2684	23.041	23.2355	23.0291	23.305	22.9343	23.0895
G4VAR1	tr|G4VAR1|G4VAR1_SCHMA Pre-mRNA processing protein prp39-related OS=Schistosoma mansoni GN=Smp_170570 PE=4 SV=1	23	113.61	-0.0204269	18.1835	18.516	19.3708	18.6901	18.9512	17.0713	20.1091	18.7105
G4VAR3	tr|G4VAR3|G4VAR3_SCHMA Putative cation efflux protein/ zinc transporter OS=Schistosoma mansoni GN=Smp_170590 PE=4 SV=1	4	242.88	M only				N/A	15.2046	15.3915	14.2702	14.9554
G4VAR5	tr|G4VAR5|G4VAR5_SCHMA Putative zinc finger protein OS=Schistosoma mansoni GN=Smp_088940 PE=4 SV=1	3	35.931	M only				N/A	17.9261	17.0963	17.9858	17.6694
G4VAR6	tr|G4VAR6|G4VAR6_SCHMA Hypoxia upregulated 1 (Hyou1)-related OS=Schistosoma mansoni GN=Smp_088950 PE=3 SV=1	27	95.219	-0.352172	21.507	21.3902	21.6287	21.5087	21.7164	21.7601	22.1061	21.8608
G4VAS0	tr|G4VAS0|G4VAS0_SCHMA 40S ribosomal protein SA OS=Schistosoma mansoni GN=Smp_179180 PE=3 SV=1	10	33.295	0.954392	25.8379	25.9579	25.8688	25.8882	24.824	25.1796	24.7979	24.9338
G4VAS5	tr|G4VAS5|G4VAS5_SCHMA Uncharacterized protein OS=Schistosoma mansoni GN=Smp_166340 PE=4 SV=1	1	14.439	-0.638217	18.8982	18.5239	18.4203	18.6141	19.4517	19.4175	18.8879	19.2524
G4VAS9;G4VAT0	tr|G4VAS9|G4VAS9_SCHMA Cell polarity protein OS=Schistosoma mansoni GN=Smp_104030.3 PE=4 SV=1;tr|G4VAT0|G4VAT0_SCHMA Cell polarity protein OS=Schistosoma mansoni GN=Smp_104030.2 PE=4 SV=1	5	158.5	-0.766252	15.6305	14.5056	16.211	15.449	16.7694	15.0849	16.7915	16.2153
G4VAT1	tr|G4VAT1|G4VAT1_SCHMA Uncharacterized protein OS=Schistosoma mansoni GN=Smp_180210 PE=4 SV=1	3	60.484	-0.386353	14.4209	15.2498		14.8353	14.1953	15.6861	15.7836	15.2217
G4VAT4	tr|G4VAT4|G4VAT4_SCHMA Uncharacterized protein OS=Schistosoma mansoni GN=Smp_103990 PE=4 SV=1	7	33.33	1.38555	19.7657	19.2167	19.6027	19.5284	17.9467	18.176	18.3057	18.1428
G4VAT7	tr|G4VAT7|G4VAT7_SCHMA Serine/threonine kinase OS=Schistosoma mansoni GN=Smp_103950 PE=3 SV=1	9	44.439	0.605823	18.1686	18.3802	18.741	18.4299	18.2264	15.7808	19.4652	17.8241
G4VAV1	tr|G4VAV1|G4VAV1_SCHMA Putative glycerol-3-phosphate dehydrogenase OS=Schistosoma mansoni GN=Smp_121990 PE=4 SV=1	17	75.137	0.18051	19.2099	19.8972	20.556	19.8877	20.0568	18.8044	20.2603	19.7072
G4VAW4;G4VAW3	tr|G4VAW4|G4VAW4_SCHMA Putative hyperparathyroidism homolog OS=Schistosoma mansoni GN=Smp_144090.2 PE=4 SV=1;tr|G4VAW3|G4VAW3_SCHMA Putative hyperparathyroidism homolog OS=Schistosoma mansoni GN=Smp_144090.1 PE=4 SV=1	4	55.492	1.4838	17.2126	16.4605	16.5213	16.7314	15.6353	16.4843	13.6232	15.2476
G4VAX2	tr|G4VAX2|G4VAX2_SCHMA Uncharacterized protein OS=Schistosoma mansoni GN=Smp_025680 PE=4 SV=1	3	24.242	-1.62344	17.3238	17.2	16.8399	17.1212	18.8728	18.8668	18.4944	18.7446
G4VAX8	tr|G4VAX8|G4VAX8_SCHMA Uncharacterized protein OS=Schistosoma mansoni GN=Smp_115290 PE=4 SV=1	4	12.396	1.41677	19.9656	19.5888	19.5132	19.6892	18.5005	17.8328	18.484	18.2724
G4VAY2	tr|G4VAY2|G4VAY2_SCHMA Uncharacterized protein Smp_200920 OS=Schistosoma mansoni GN=Smp_200920 PE=4 SV=1	4	10.828	0.582704	22.3306	22.5567	22.8947	22.594	22.2682	20.9046	22.8611	22.0113
G4VAZ9	tr|G4VAZ9|G4VAZ9_SCHMA Uncharacterized protein OS=Schistosoma mansoni GN=Smp_210440 PE=3 SV=1	15	56.686	-0.123643	20.9705	21.2074	21.3579	21.1786	21.2689	21.2856	21.3522	21.3023
G4VB00	tr|G4VB00|G4VB00_SCHMA Uncharacterized protein OS=Schistosoma mansoni GN=Smp_210450 PE=4 SV=1	8	42.538	1.44674	18.5998	19.1877	19.3752	19.0542	16.6139	18.7052	17.5034	17.6075
G4VB10	tr|G4VB10|G4VB10_SCHMA Katanin p60 ATPase-containing subunit A1 OS=Schistosoma mansoni GN=KATNA1 PE=3 SV=1	2	57.957	-2.76671	15.0402	14.827	14.4338	14.767	17.282	17.8377	17.4814	17.5337
G4VB13	tr|G4VB13|G4VB13_SCHMA Uncharacterized protein OS=Schistosoma mansoni GN=Smp_110280 PE=4 SV=1	7	67.071	1.5551	17.5126	17.5401	18.462	17.8382	15.5884	13.7083	19.5526	16.2831
G4VB15	tr|G4VB15|G4VB15_SCHMA Sr-related ctd associated factor OS=Schistosoma mansoni GN=Smp_007180 PE=4 SV=1	6	126.94	0.704919	18.2124	17.3893	17.5834	17.7284	17.1503	16.8658	17.0542	17.0234
G4VB16	tr|G4VB16|G4VB16_SCHMA Uncharacterized protein OS=Schistosoma mansoni GN=Smp_007170 PE=4 SV=1	7	41.157	0.468008	21.026	20.6243	20.8332	20.8278	20.3472	20.5886	20.1437	20.3598
G4VB23	tr|G4VB23|G4VB23_SCHMA Pol-related OS=Schistosoma mansoni GN=Smp_126020 PE=4 SV=1	17	62.925	-0.903657	18.635	19.2074	19.4952	19.1125	19.943	20.1218	19.9838	20.0162
G4VB51	tr|G4VB51|G4VB51_SCHMA Uncharacterized protein OS=Schistosoma mansoni GN=Smp_196910 PE=4 SV=1	5	36.147	1.07575	16.9979	18.0056	17.3083	17.4373	16.3615			16.3615
G4VB52	tr|G4VB52|G4VB52_SCHMA Uncharacterized protein OS=Schistosoma mansoni GN=Smp_040460 PE=4 SV=1	1	79.336	1.12995	17.0911	16.9739	17.0392	17.0347	15.9048			15.9048
G4VB55	tr|G4VB55|G4VB55_SCHMA Glycine amidinotransferase OS=Schistosoma mansoni GN=Smp_144220 PE=4 SV=1	7	44.483	-1.59822	15.7564	17.7381	17.0139	16.8361	19.0928		17.7759	18.4344
G4VB57	tr|G4VB57|G4VB57_SCHMA Peptidylprolyl isomerase OS=Schistosoma mansoni GN=Smp_040500 PE=4 SV=1	14	39.397	-0.587533	20.3954	20.433	20.4758	20.4348	20.9389	21.1711	20.9569	21.0223
G4VB62;G4VB58	tr|G4VB62|G4VB62_SCHMA Putative alpha-mannoside beta-1,6-n-acetylglucosaminyltransferase OS=Schistosoma mansoni GN=Smp_144260 PE=4 SV=1;tr|G4VB58|G4VB58_SCHMA Putative alpha-mannoside beta-1,6-n-acetylglucosaminyltransferase OS=Schistosoma mansoni GN=Smp_0	2	43.1	-1.55706	14.9951	15.0818		15.0384	16.7247	17.1897	15.872	16.5955
G4VB63	tr|G4VB63|G4VB63_SCHMA Putative atp-dependent transporter OS=Schistosoma mansoni GN=Smp_040540 PE=4 SV=1	18	73.216	0.530023	21.4563	21.0009	21.335	21.264	20.7482	20.8616	20.5923	20.734
G4VB67	tr|G4VB67|G4VB67_SCHMA Cytoplasmic tRNA 2-thiolation protein 1 OS=Schistosoma mansoni GN=Smp_040560 PE=3 SV=1	1	35.896	0.879081	15.4241	15.0137	14.3635	14.9338	14.1263		13.983	14.0547
G4VB69;G4VB68	tr|G4VB69|G4VB69_SCHMA Putative rab5 OS=Schistosoma mansoni GN=Smp_040570.1 PE=4 SV=1;tr|G4VB68|G4VB68_SCHMA Putative rab5 OS=Schistosoma mansoni GN=Smp_040570.2 PE=4 SV=1	12	21.918	-0.597464	22.2991	22.7898	22.5404	22.5431	23.1957	23.1892	23.0367	23.1405
G4VB75;G4VB73;A0A146MG81	tr|G4VB75|G4VB75_SCHMA Putative cytoplasmic dynein light chain OS=Schistosoma mansoni GN=Smp_040680 PE=4 SV=1;tr|G4VB73|G4VB73_SCHMA Uncharacterized protein Smp_200180 OS=Schistosoma mansoni GN=Smp_200180 PE=4 SV=1;tr|A0A146MG81|A0A146MG81_SCHMA Uncharacte	1	10.327	1.8079	18.4184	22.4842	22.0229	20.9751	21.2319		17.1026	19.1672
G4VB90	tr|G4VB90|G4VB90_SCHMA Putative ubiquitin-conjugating enzyme E2r OS=Schistosoma mansoni GN=Smp_055960 PE=3 SV=1	6	32.379	1.32932	20.301	20.8296	20.4669	20.5325	19.4466	19.0632	19.0997	19.2032
G4VBB0	tr|G4VBB0|G4VBB0_SCHMA Uncharacterized protein OS=Schistosoma mansoni GN=Smp_102490 PE=4 SV=1	3	33.413	0.433872	18.6782	18.2608	18.241	18.3933	17.3692		18.5497	17.9595
G4VBD2	tr|G4VBD2|G4VBD2_SCHMA Gamma-tubulin complex component OS=Schistosoma mansoni GN=Smp_159180 PE=3 SV=1	4	96.583	-0.279963	15.831	15.341	16.3553	15.8424	16.1554	15.4914	16.7204	16.1224
G4VBD5;I6TMT9	tr|G4VBD5|G4VBD5_SCHMA Putative dead box ATP-dependent RNA helicase OS=Schistosoma mansoni GN=Smp_068440 PE=4 SV=1;tr|I6TMT9|I6TMT9_SCHMA Vasa-like DEAD-box RNA helicase (Fragment) OS=Schistosoma mansoni GN=vlg3 PE=2 SV=1	7	103.73	1.08731	17.6849	17.7423	17.2922	17.5732	16.5313	16.1775	16.7488	16.4859
G4VBF0	tr|G4VBF0|G4VBF0_SCHMA Putative rabkinesin-6 OS=Schistosoma mansoni GN=Smp_137660 PE=3 SV=1	15	138.01	-2.6684	15.1145	15.7329	15.7904	15.5459	18.207	17.7106	18.7254	18.2143
G4VBF1	tr|G4VBF1|G4VBF1_SCHMA Mannose-1-phosphate guanyltransferase OS=Schistosoma mansoni GN=Smp_028730 PE=4 SV=1	9	35.084	-1.65808	19.171	19.5212	19.3252	19.3391	21.0076	21.0161	20.9679	20.9972
G4VBF2	tr|G4VBF2|G4VBF2_SCHMA Uncharacterized protein OS=Schistosoma mansoni GN=Smp_137650 PE=4 SV=1	12	131.7	2.02653	17.1022	17.4859	17.2943	17.2941	14.8807	13.9309	16.9912	15.2676
G4VBF7	tr|G4VBF7|G4VBF7_SCHMA Uncharacterized protein Smp_201730 OS=Schistosoma mansoni GN=Smp_201730 PE=4 SV=1	2	11.289	-0.327874	18.4783	17.7742	18.378	18.2102	18.7049	18.5483	18.361	18.538
G4VBG0	tr|G4VBG0|G4VBG0_SCHMA Kettin/titin-related protein OS=Schistosoma mansoni GN=Smp_123770 PE=4 SV=1	8	49.707	-0.0394326	17.2159	17.5671	16.9647	17.2492	18.0032	16.7433	17.1194	17.2887
G4VBG2	tr|G4VBG2|G4VBG2_SCHMA Putative ring finger protein 11 (Sid 1669) (Nedd4 ww domain-binding protein 2) OS=Schistosoma mansoni GN=Smp_047700 PE=4 SV=1	10	52.493	2.38555	19.5538	19.197	19.0052	19.252	16.6714		17.0615	16.8665
G4VBG5;G4VBG4	tr|G4VBG5|G4VBG5_SCHMA Ferritin OS=Schistosoma mansoni GN=Smp_047660 PE=3 SV=1;tr|G4VBG4|G4VBG4_SCHMA Ferritin OS=Schistosoma mansoni GN=Smp_047680 PE=3 SV=1	6	20.934	-1.64018	21.7862	21.8721	21.5687	21.7423	23.5511	23.8338	22.7626	23.3825
G4VBG8	tr|G4VBG8|G4VBG8_SCHMA Putative adp-ribosylglycohydrolase OS=Schistosoma mansoni GN=Smp_147630 PE=4 SV=1	6	39.532	0.0900822	18.1068	19.1579	18.3274	18.5307	18.102	19.0325	18.1873	18.4406
G4VBH0	tr|G4VBH0|G4VBH0_SCHMA Cell division control protein 45-related OS=Schistosoma mansoni GN=Smp_047610 PE=4 SV=1	3	65.507	-1.0755		14.7494	15.0897	14.9196	15.5684	16.5719	15.8449	15.9951
G4VBH2	tr|G4VBH2|G4VBH2_SCHMA Uncharacterized protein OS=Schistosoma mansoni GN=Smp_210320 PE=4 SV=1	12	39.852	1.13954	21.424	21.5388	21.2735	21.4121	20.3442	20.6244	19.8491	20.2725
G4VBH5	tr|G4VBH5|G4VBH5_SCHMA Putative peptide chain release factor OS=Schistosoma mansoni GN=Smp_211090 PE=4 SV=1	11	49.071	0.71633	19.7664	19.5335	19.7558	19.6852	18.8721	18.9977	19.0369	18.9689
G4VBH6	tr|G4VBH6|G4VBH6_SCHMA Putative peptide chain release factor OS=Schistosoma mansoni GN=Smp_211100 PE=4 SV=1	20	90.558	-0.751816	17.7753	18.5476	19.5119	18.6116	19.6456	17.7473	20.6974	19.3634
G4VBH9	tr|G4VBH9|G4VBH9_SCHMA Putative nedd4-binding protein 2 OS=Schistosoma mansoni GN=Smp_147600 PE=4 SV=1	3	88.076	0.154486	15.4962	15.5713	15.3554	15.4743	15.2326	16.1854	14.5414	15.3198
G4VBI3	tr|G4VBI3|G4VBI3_SCHMA Putative snare protein ykt6 OS=Schistosoma mansoni GN=Smp_047450 PE=3 SV=1	5	22.752	-0.181653	18.8765	19.3176	19.572	19.2553	18.9117	19.4728	19.9265	19.437
G4VBI8	tr|G4VBI8|G4VBI8_SCHMA Uncharacterized protein OS=Schistosoma mansoni GN=Smp_047400 PE=4 SV=1	1	20.191	0.822718	18.5296	18.4422	17.635	18.2023		17.8066	16.9525	17.3795
G4VBJ0	tr|G4VBJ0|G4VBJ0_SCHMA Malate dehydrogenase OS=Schistosoma mansoni GN=Smp_047370 PE=3 SV=1	16	36.328	-0.622343	25.0895	25.2713	25.5	25.2869	26.0978	25.5041	26.1259	25.9093
G4VBJ1;G4VBJ2	tr|G4VBJ1|G4VBJ1_SCHMA Ubx6(Yeast)-related OS=Schistosoma mansoni GN=Smp_047360.2 PE=4 SV=1;tr|G4VBJ2|G4VBJ2_SCHMA Ubx6(Yeast)-related OS=Schistosoma mansoni GN=Smp_047360.1 PE=4 SV=1	8	34.608	-0.246262	21.4425	20.9994	21.0728	21.1715	21.4224	21.7765	21.0545	21.4178
G4VBK2	tr|G4VBK2|G4VBK2_SCHMA Uncharacterized protein OS=Schistosoma mansoni GN=Smp_044810 PE=4 SV=1	16	74.912	2.16336	19.123	19.1834	19.3736	19.2267	18.2973	14.2433	18.6493	17.0633
G4VBK5	tr|G4VBK5|G4VBK5_SCHMA Ribokinase OS=Schistosoma mansoni GN=Smp_044850 PE=3 SV=1	4	39.147	2.32455	18.6922	19.5621	18.4554	18.9033	16.5787			16.5787
G4VBK6	tr|G4VBK6|G4VBK6_SCHMA Putative dead box ATP-dependent RNA helicase OS=Schistosoma mansoni GN=Smp_146340 PE=3 SV=1	9	70.24	1.8904	14.2381	17.0195	17.6181	16.2919	13.3884		15.4145	14.4015
G4VBL1	tr|G4VBL1|G4VBL1_SCHMA Uncharacterized protein OS=Schistosoma mansoni GN=Smp_123340 PE=4 SV=1	1	40.205	F only	16.4939	15.7481	15.5048	15.9156				N/A
G4VBL5	tr|G4VBL5|G4VBL5_SCHMA Uncharacterized protein OS=Schistosoma mansoni GN=Smp_096900 PE=4 SV=1	5	62.428	-0.547952	16.8548	17.0745	17.1238	17.0177	17.7762	17.7536	17.1672	17.5657
G4VBM7	tr|G4VBM7|G4VBM7_SCHMA Protein RER1 OS=Schistosoma mansoni GN=Smp_099690 PE=3 SV=1	3	22.8	-0.951428	16.4982		18.1008	17.2995	17.4454	17.6774	19.6299	18.2509
G4VBM8	tr|G4VBM8|G4VBM8_SCHMA Putative hypoxia associated factor OS=Schistosoma mansoni GN=Smp_176840 PE=4 SV=1	15	86.194	1.17599	19.6232	19.3066	19.3106	19.4134	17.5827	18.4013	18.7284	18.2375
G4VBN1	tr|G4VBN1|G4VBN1_SCHMA Fragile X related 1, frx1 OS=Schistosoma mansoni GN=Smp_099630 PE=4 SV=1	17	65.843	0.646427	21.6522	21.7739	21.8396	21.7552	21.2313	20.7648	21.3304	21.1088
G4VBN2	tr|G4VBN2|G4VBN2_SCHMA Elav (Embryonic lethal, abnormal vision,drosophila)-like protein OS=Schistosoma mansoni GN=Smp_176810 PE=4 SV=1	2	45.987	F only	15.7709	16.683	16.465	16.3063				N/A
G4VBN3	tr|G4VBN3|G4VBN3_SCHMA Serine/threonine kinase OS=Schistosoma mansoni GN=Smp_103570 PE=4 SV=1	2	59.655	0.811645	15.5338	15.9993	16.3112	15.9481	13.8897	15.81	15.7096	15.1365
G4VBN6	tr|G4VBN6|G4VBN6_SCHMA Succinate--CoA ligase [GDP-forming] subunit beta, mitochondrial OS=Schistosoma mansoni GN=Smp_060820 PE=3 SV=1	3	47.941	-0.115285	16.2045	17.2513	17.8221	17.0926	17.2549	17.3279	17.041	17.2079
G4VBN8	tr|G4VBN8|G4VBN8_SCHMA Uncharacterized protein OS=Schistosoma mansoni GN=Smp_154830 PE=4 SV=1	7	118.31	-0.720216	15.8013	14.9093	15.2385	15.3163	15.1468	15.8885	17.0744	16.0366
G4VBP0	tr|G4VBP0|G4VBP0_SCHMA Uncharacterized protein OS=Schistosoma mansoni GN=Smp_060860 PE=4 SV=1	2	72.625	-0.94002	17.6519	17.3747	17.533	17.5199	18.7191	20.7439	15.9166	18.4599
G4VBP5;G4VBP4	tr|G4VBP5|G4VBP5_SCHMA U4/U6-associated RNA splicing factor-related OS=Schistosoma mansoni GN=Smp_060900.2 PE=4 SV=1;tr|G4VBP4|G4VBP4_SCHMA U4/U6-associated RNA splicing factor-related OS=Schistosoma mansoni GN=Smp_060900.1 PE=4 SV=1	8	47.108	1.65591	19.0602	19.0431	19.1257	19.0764	17.9695	16.022	18.2699	17.4204
G4VBP6	tr|G4VBP6|G4VBP6_SCHMA Putative small nuclear ribonucleoprotein f (Snrnp-f) OS=Schistosoma mansoni GN=Smp_060910 PE=3 SV=1	5	9.685	-0.351254	19.9275	21.1509	19.9158	20.3314	20.4388	20.5537	21.0555	20.6827
G4VBP9;G4VBQ0	tr|G4VBP9|G4VBP9_SCHMA Protein kinase OS=Schistosoma mansoni GN=Smp_060940.2 PE=4 SV=1;tr|G4VBQ0|G4VBQ0_SCHMA Protein kinase OS=Schistosoma mansoni GN=Smp_060940.1 PE=4 SV=1	4	110.15	0.951373	14.6169	15.5827	16.2177	15.4725			14.5211	14.5211
G4VBQ1	tr|G4VBQ1|G4VBQ1_SCHMA Putative soluble NSF attachment protein (SNAP) OS=Schistosoma mansoni GN=Smp_060950 PE=4 SV=1	12	32.485	0.371821	20.9924	20.7526	20.821	20.8553	20.5225	20.8463	20.0817	20.4835
G4VBQ8	tr|G4VBQ8|G4VBQ8_SCHMA Putative pold3 protein OS=Schistosoma mansoni GN=Smp_154930 PE=4 SV=1	3	49.642	0.258191	16.8161	16.9437	16.9684	16.9094	16.2992	17.3551	16.2994	16.6512
G4VBQ9	tr|G4VBQ9|G4VBQ9_SCHMA Putative f-actin capping protein beta subunit (Fragment) OS=Schistosoma mansoni GN=Smp_100370 PE=4 SV=1	4	6.1999	0.421793	22.56	22.2781	22.4248	22.4209	21.9716	22.2432	21.7826	21.9992
G4VBS1	tr|G4VBS1|G4VBS1_SCHMA Uncharacterized protein OS=Schistosoma mansoni GN=Smp_045250 PE=4 SV=1	10	47.359	-0.072727	19.5565	19.5557	19.9285	19.6802	19.531	19.6215	20.1063	19.753
G4VBS3	tr|G4VBS3|G4VBS3_SCHMA Putative myosin light chain 1 OS=Schistosoma mansoni GN=Smp_045220 PE=4 SV=1	11	12.283	-0.910708	21.8268	22.4699	20.9961	21.7643	22.8426	22.3785	22.8038	22.675
G4VBT2;G4VBT0;G4VBT1	tr|G4VBT2|G4VBT2_SCHMA Putative serine/arginine rich splicing factor OS=Schistosoma mansoni GN=Smp_113620.1 PE=4 SV=1;tr|G4VBT0|G4VBT0_SCHMA Putative serine/arginine rich splicing factor OS=Schistosoma mansoni GN=Smp_113620.2 PE=4 SV=1;tr|G4VBT1|G4VBT1_SCH	5	11.963	0.902991	23.4682	23.5069	23.478	23.4844	22.9774	22.1561	22.6107	22.5814
G4VBT5	tr|G4VBT5|G4VBT5_SCHMA Putative f-actin capping protein beta subunit OS=Schistosoma mansoni GN=Smp_186650 PE=4 SV=1	5	27.082	0.337045	20.7045	20.9919	20.7761	20.8242	20.6231	20.4605	20.3778	20.4871
G4VBU6	tr|G4VBU6|G4VBU6_SCHMA Proteasome endopeptidase complex OS=Schistosoma mansoni GN=Smp_207080 PE=3 SV=1	12	25.711	0.154525	22.5206	22.6693	22.4618	22.5506	22.5939	22.7781	21.8161	22.396
G4VBU8	tr|G4VBU8|G4VBU8_SCHMA Putative translation initiation factor eif-2b beta subunit OS=Schistosoma mansoni GN=Smp_014620 PE=3 SV=1	9	40.665	-0.658662	18.1499	18.261	18.1764	18.1958	19.0435	19.1288	18.3909	18.8544
G4VBV1	tr|G4VBV1|G4VBV1_SCHMA 40S ribosomal protein S30 OS=Schistosoma mansoni GN=Smp_014650 PE=3 SV=1	1	14.695	1.46721	24.4573	24.1241	24.0637	24.215	22.6584	22.7812	22.8038	22.7478
G4VBV5;G4VBV6	tr|G4VBV5|G4VBV5_SCHMA Adducin related protein OS=Schistosoma mansoni GN=Smp_014670.2 PE=4 SV=1;tr|G4VBV6|G4VBV6_SCHMA Adducin related protein OS=Schistosoma mansoni GN=Smp_014670.1 PE=4 SV=1	10	92.159	-0.947115	18.1319	18.4103	18.3631	18.3018	19.3667	18.7651	19.6148	19.2489
G4VBV9	tr|G4VBV9|G4VBV9_SCHMA Putative ubiquitin 1 OS=Schistosoma mansoni GN=Smp_130170 PE=4 SV=1	2	8.8623	-1.19319	19.7539	19.6528	15.9863	18.4643	19.6746	19.3945	19.9034	19.6575
G4VBW0	tr|G4VBW0|G4VBW0_SCHMA Uncharacterized protein OS=Schistosoma mansoni GN=Smp_130180 PE=4 SV=1	11	192.4	1.32817	16.0749	16.116	16.5772	16.256	14.1111		15.7446	14.9279
G4VBW4;G4VBW5	tr|G4VBW4|G4VBW4_SCHMA Putative alpha-actinin OS=Schistosoma mansoni GN=Smp_014780.2 PE=4 SV=1;tr|G4VBW5|G4VBW5_SCHMA Putative alpha-actinin OS=Schistosoma mansoni GN=Smp_014780.1 PE=4 SV=1	38	104.94	0.214246	22.3137	22.1075	22.2116	22.211	21.9387	22.068	21.9835	21.9967
G4VBW9;G4VBW8	tr|G4VBW9|G4VBW9_SCHMA Actin-related protein 2, arp2 OS=Schistosoma mansoni GN=Smp_101290.1 PE=3 SV=1;tr|G4VBW8|G4VBW8_SCHMA Actin-related protein 2, arp2 OS=Schistosoma mansoni GN=Smp_101290.2 PE=3 SV=1	7	37.341	-0.775798	20.3048	19.2859	20.466	20.0189	20.8304	20.738	20.8156	20.7947
G4VBX0;G4VBX1	tr|G4VBX0|G4VBX0_SCHMA PRA1 family protein OS=Schistosoma mansoni GN=Smp_014800.1 PE=3 SV=1;tr|G4VBX1|G4VBX1_SCHMA PRA1 family protein OS=Schistosoma mansoni GN=Smp_014800.2 PE=3 SV=1	1	16.306	-0.739604	18.1981	18.5438	18.486	18.4093	19.0311	18.9532	19.4624	19.1489
G4VBX5	tr|G4VBX5|G4VBX5_SCHMA Putative dreadlocks/dock OS=Schistosoma mansoni GN=Smp_014850 PE=4 SV=1	3	77.188	0.768526	15.6093	15.9218	15.8285	15.7865	14.9887	15.1406	14.9247	15.018
G4VBY0	tr|G4VBY0|G4VBY0_SCHMA Putative pre-mRNA-splicing factor CLF1 OS=Schistosoma mansoni GN=Smp_148230 PE=4 SV=1	7	109.8	1.90368	17.2436	16.5347	17.6888	17.1557	15.6521	15.4022	14.7018	15.252
G4VBY2;G4VBY1	tr|G4VBY2|G4VBY2_SCHMA Putative sumo-1-activating enzyme E1a OS=Schistosoma mansoni GN=Smp_048760.1 PE=4 SV=1;tr|G4VBY1|G4VBY1_SCHMA Putative sumo-1-activating enzyme E1a OS=Schistosoma mansoni GN=Smp_048760.2 PE=4 SV=1	9	39.189	0.668822	21.0003	21.212	21.4846	21.2323	20.6743	21.0802	19.9358	20.5635
G4VBY8	tr|G4VBY8|G4VBY8_SCHMA Uncharacterized protein OS=Schistosoma mansoni GN=Smp_048830 PE=4 SV=1	1	10.98	0.215479	19.2122	19.4264	19.0004	19.213	19.2014	18.7688	19.0224	18.9975
G4VBZ2	tr|G4VBZ2|G4VBZ2_SCHMA Divalent cation tolerance cuta-related OS=Schistosoma mansoni GN=Smp_048870 PE=4 SV=1	1	14.517	0.59243	19.2798	18.9481	19.0726	19.1002	18.3949	18.6221	18.5062	18.5078
G4VBZ3	tr|G4VBZ3|G4VBZ3_SCHMA Uncharacterized protein OS=Schistosoma mansoni GN=Smp_048880 PE=4 SV=1	4	13.373	1.47668	20.2314	20.09	20.3218	20.2144	18.766	18.8077	18.6394	18.7377
G4VBZ7	tr|G4VBZ7|G4VBZ7_SCHMA Putative ran-binding protein OS=Schistosoma mansoni GN=Smp_048930 PE=4 SV=1	2	23.017	-0.747887	17.8857	18.6542	18.7882	18.4427	19.1961	19.4946	18.8811	19.1906
G4VBZ8	tr|G4VBZ8|G4VBZ8_SCHMA Williams-beuren syndrome critical region protein-related OS=Schistosoma mansoni GN=Smp_048940 PE=4 SV=1	4	25.75	-0.53087	18.9549	19.9315	19.513	19.4664	20.1258	20.2834	19.5827	19.9973
G4VBZ9	tr|G4VBZ9|G4VBZ9_SCHMA Putative uveal autoantigen with coiled-coil domains and ankyrin repeats protein (Beta-actin-binding protein) (BetaCAP73) OS=Schistosoma mansoni GN=Smp_148370 PE=4 SV=1	6	164.66	-2.64294	12.8751			12.8751	15.9977	15.949	14.6075	15.5181
G4VC04	tr|G4VC04|G4VC04_SCHMA Rna-binding protein related OS=Schistosoma mansoni GN=Smp_049010 PE=4 SV=1	4	69.59	F only	17.314	17.0431	17.0621	17.1397				N/A
G4VC10	tr|G4VC10|G4VC10_SCHMA Uncharacterized protein OS=Schistosoma mansoni GN=Smp_148440 PE=4 SV=1	5	46.229	1.29069	17.3586	20.4564	20.4309	19.4153	17.989		18.2602	18.1246
G4VC11	tr|G4VC11|G4VC11_SCHMA Putative chitinase OS=Schistosoma mansoni GN=Smp_148450 PE=4 SV=1	10	49.215	0.0671962	20.598	20.5103	20.5824	20.5636	20.6228	20.4653	20.4011	20.4964
G4VC15	tr|G4VC15|G4VC15_SCHMA Aspartate aminotransferase OS=Schistosoma mansoni GN=Smp_049150 PE=4 SV=1	16	45.644	-0.706261	21.2478	21.6196	21.3707	21.4127	22.112	22.4083	21.8366	22.119
G4VC17	tr|G4VC17|G4VC17_SCHMA Putative camp-regulated phosphoprotein OS=Schistosoma mansoni GN=Smp_049170 PE=3 SV=1	1	14.25	1.44411	20.2154	20.3903	19.5362	20.0473			18.6032	18.6032
G4VC18	tr|G4VC18|G4VC18_SCHMA Putative cleavage and polyadenylation specificity factor cpsf OS=Schistosoma mansoni GN=Smp_148480 PE=4 SV=1	11	203.95	-0.795562	13.733	14.6791	17.003	15.1384	15.8211	16.0326	15.948	15.9339
G4VC21	tr|G4VC21|G4VC21_SCHMA Uncharacterized protein OS=Schistosoma mansoni GN=Smp_148510 PE=3 SV=1	14	41.774	-0.361785	21.2034	21.0868	20.9508	21.0803	21.3694	21.7782	21.1788	21.4421
G4VC25	tr|G4VC25|G4VC25_SCHMA Rab GDP dissociation inhibitor OS=Schistosoma mansoni GN=Smp_094420 PE=3 SV=1	26	50.273	-0.13162	24.0974	24.0743	23.9174	24.0297	24.2252	24.099	24.1599	24.1613
G4VC26	tr|G4VC26|G4VC26_SCHMA Rab GDP dissociation inhibitor OS=Schistosoma mansoni GN=Smp_024520 PE=3 SV=1	13	50.729	-1.69233	19.8295	20.4522	20.0154	20.099	21.8597	21.8616	21.6528	21.7914
G4VC35	tr|G4VC35|G4VC35_SCHMA ADP-ribosylation factor-like 6, arl6 OS=Schistosoma mansoni GN=Smp_105480 PE=3 SV=1	3	21.466	M only				N/A	18.3474	18.3102	17.6189	18.0922
G4VC46	tr|G4VC46|G4VC46_SCHMA Putative dna-directed rna polymerase II 19 kD polypeptide rpb7 OS=Schistosoma mansoni GN=Smp_128840 PE=4 SV=1	3	21.816	0.291245	19.5909	17.6892	19.8143	19.0314	19.5079	19.3839	17.3287	18.7402
G4VC49	tr|G4VC49|G4VC49_SCHMA Uncharacterized protein OS=Schistosoma mansoni GN=Smp_012410 PE=4 SV=1	9	43.231	1.24225	20.1711	20.0865	20.0979	20.1185	19.0574	18.4275	19.1437	18.8762
G4VC55;Q1WL54;G4VC56	tr|G4VC55|G4VC55_SCHMA Venom allergen-like (VAL) 11 protein OS=Schistosoma mansoni GN=Smp_012350.1 PE=4 SV=1;tr|Q1WL54|Q1WL54_SCHMA Venom allergen-like protein 11 OS=Schistosoma mansoni PE=2 SV=1;tr|G4VC56|G4VC56_SCHMA Venom allergen-like (VAL) 11 protein	2	44.905	-0.0590096	16.6443	16.3242	16.4617	16.4768	16.9141	16.65	16.0433	16.5358
G4VC58	tr|G4VC58|G4VC58_SCHMA Ubiquitin-specific peptidase 4 (C19 family) OS=Schistosoma mansoni GN=Smp_128770 PE=3 SV=1	21	98.829	0.988003	21.0222	21.023	20.8988	20.9813	19.9949	20.1278	19.8573	19.9933
G4VC62	tr|G4VC62|G4VC62_SCHMA Uncharacterized protein OS=Schistosoma mansoni GN=Smp_012280 PE=4 SV=1	8	37.278	1.62003	21.0043	20.3794	19.8252	20.403	19.0011	19.2777	18.07	18.7829
G4VC69	tr|G4VC69|G4VC69_SCHMA Putative tryptophanyl-tRNA synthetase OS=Schistosoma mansoni GN=Smp_082860 PE=3 SV=1	17	47.067	1.10805	22.3796	22.1679	22.1739	22.2405	21.1115	21.3351	20.9506	21.1324
G4VC72;G4VC71	tr|G4VC72|G4VC72_SCHMA Putative cullin OS=Schistosoma mansoni GN=Smp_082850.2 PE=3 SV=1;tr|G4VC71|G4VC71_SCHMA Putative cullin OS=Schistosoma mansoni GN=Smp_082850.1 PE=3 SV=1	11	86.749	-0.0883398	16.6839	16.8067	17.7425	17.0777	17.5596	16.7245	17.2139	17.166
G4VC76;Q8I899;G4VC77	tr|G4VC76|G4VC76_SCHMA Cell polarity protein OS=Schistosoma mansoni GN=Smp_082810.2 PE=3 SV=1;tr|Q8I899|Q8I899_SCHMA Cdc42 (Fragment) OS=Schistosoma mansoni GN=Cdc42 PE=2 SV=1;tr|G4VC77|G4VC77_SCHMA Cell polarity protein OS=Schistosoma mansoni GN=Smp_08281	3	21.839	0.792007	18.4292	18.3578	18.4605	18.4158	19.4601	18.3177	15.0937	17.6238
G4VC78	tr|G4VC78|G4VC78_SCHMA Sly1-related OS=Schistosoma mansoni GN=Smp_082800 PE=3 SV=1	14	66.719	0.434832	18.5697	19.0774	18.1347	18.5939	18.4898	18.3489	17.6386	18.1591
G4VC79	tr|G4VC79|G4VC79_SCHMA General transcription factor IIH subunit 4 OS=Schistosoma mansoni GN=Smp_082790 PE=3 SV=1	2	55.094	0.389799	14.5913	13.8262	15.4579	14.6251	13.616	15.3694	13.7205	14.2353
G4VC85	tr|G4VC85|G4VC85_SCHMA Putative pdz domain containing protein OS=Schistosoma mansoni GN=Smp_082740 PE=4 SV=1	1	29.125	-0.0242419	16.9327	16.4784	16.8186	16.7432	17.0377		16.4972	16.7675
G4VC91	tr|G4VC91|G4VC91_SCHMA Putative aaa family ATPase OS=Schistosoma mansoni GN=Smp_082670 PE=4 SV=1	2	86.99	-1.69301	17.6731	16.9302	16.5238	17.0424	17.5181	19.9527		18.7354
G4VC92	tr|G4VC92|G4VC92_SCHMA Transcription intermediary factor 1-related OS=Schistosoma mansoni GN=Smp_082660 PE=4 SV=1	13	78.203	-0.5579	18.8108	19.1307	19.2451	19.0622	19.6433	19.7216	19.4955	19.6201
G4VC95	tr|G4VC95|G4VC95_SCHMA Farnesylated-protein converting enzyme 1 (M48 family) OS=Schistosoma mansoni GN=Smp_082620 PE=4 SV=1	15	54.93	-1.09623	20.3685	20.375	22.0207	20.9214	21.9997	22.0657	21.9875	22.0176
G4VC97	tr|G4VC97|G4VC97_SCHMA Excision repair helicase ercc-6-related OS=Schistosoma mansoni GN=Smp_166940 PE=4 SV=1	7	147.45	-0.401088	18.9082	13.5637	12.4377	14.9698	12.8406	17.3336	15.9386	15.3709
G4VC98	tr|G4VC98|G4VC98_SCHMA ADP-ribosylation factor-like 10, arl10 OS=Schistosoma mansoni GN=Smp_166930 PE=3 SV=1	6	21.227	-1.04994	18.222	18.853	19.5547	18.8765	19.8512	19.6897	20.2385	19.9265
G4VCA1	tr|G4VCA1|G4VCA1_SCHMA Uncharacterized protein OS=Schistosoma mansoni GN=Smp_063760 PE=4 SV=1	3	31.213	0.809173	19.156	18.7869	17.4094	18.4508	17.4667	17.1652	18.2928	17.6416
G4VCB1;G4VCB0	tr|G4VCB1|G4VCB1_SCHMA Uncharacterized protein OS=Schistosoma mansoni GN=Smp_023250.2 PE=4 SV=1;tr|G4VCB0|G4VCB0_SCHMA Uncharacterized protein OS=Schistosoma mansoni GN=Smp_023250.1 PE=4 SV=1	9	49.422	2.31624	18.4859	18.4792	17.9294	18.2982	14.8639	16.1074	16.9745	15.9819
G4VCB3	tr|G4VCB3|G4VCB3_SCHMA Putative yip1 interacting factor homolog (Yif1 protein) OS=Schistosoma mansoni GN=Smp_023230 PE=4 SV=1	3	27.902	-1.39634		16.6935	17.857	17.2752	18.724	19.6571	17.6337	18.6716
G4VCB4	tr|G4VCB4|G4VCB4_SCHMA Putative radial spokehead-l OS=Schistosoma mansoni GN=Smp_134660 PE=4 SV=1	2	57.25	M only				N/A	17.1605	17.8345	17.1845	17.3932
G4VCB5	tr|G4VCB5|G4VCB5_SCHMA CTP synthase OS=Schistosoma mansoni GN=Smp_134650 PE=3 SV=1	12	80.846	1.39879	18.5724	18.1312	18.4329	18.3789	16.9386	16.5513	17.4503	16.9801
G4VCB9	tr|G4VCB9|G4VCB9_SCHMA Uncharacterized protein OS=Schistosoma mansoni GN=Smp_023170 PE=4 SV=1	5	44.249	1.3972	20.4058	20.0699	20.2084	20.228	19.0302	19.0519	18.4103	18.8308
G4VCC0	tr|G4VCC0|G4VCC0_SCHMA V-type proton ATPase subunit F OS=Schistosoma mansoni GN=Smp_023160 PE=3 SV=1	3	13.501	0.866878	19.2875	18.8484	17.5431	18.5597	17.4622	17.8292	17.787	17.6928
G4VCC1	tr|G4VCC1|G4VCC1_SCHMA Serine/threonine-protein phosphatase OS=Schistosoma mansoni GN=Smp_023150 PE=3 SV=1	4	34.796	0.571681	18.1234	18.1856	16.221	17.51	18.3131	16.3524	16.1495	16.9383
G4VCD3	tr|G4VCD3|G4VCD3_SCHMA Uncharacterized protein OS=Schistosoma mansoni GN=Smp_169060 PE=4 SV=1	16	98.567	0.096294	18.4261	18.8837	18.9328	18.7475	18.5217	18.8082	18.6238	18.6512
G4VCD7	tr|G4VCD7|G4VCD7_SCHMA Dihydropteridine reductase OS=Schistosoma mansoni GN=Smp_086210 PE=4 SV=1	1	25.174	-0.91286	16.2606	17.0665	16.6897	16.6723	18.104	16.9432	17.7083	17.5852
G4VCE1	tr|G4VCE1|G4VCE1_SCHMA Putative aspartyl-tRNA synthetase OS=Schistosoma mansoni GN=Smp_169030 PE=4 SV=1	6	44.828	0.274362	17.9837	17.4519	18.3926	17.9428	18.1487	17.466	17.3905	17.6684
G4VCF5	tr|G4VCF5|G4VCF5_SCHMA Putative eukaryotic translation initiation factor 4e OS=Schistosoma mansoni GN=Smp_001500 PE=3 SV=1	8	24.087	0.573012	22.3275	22.1383	21.8666	22.1108	21.7102	21.7637	21.1394	21.5378
G4VCF9	tr|G4VCF9|G4VCF9_SCHMA Putative beta-arrestin 1 OS=Schistosoma mansoni GN=Smp_122900 PE=4 SV=1	5	31.717	-2.39127	16.2457	16.7887	15.7208	16.2517	18.5002	18.8982	18.5306	18.643
G4VCG3	tr|G4VCG3|G4VCG3_SCHMA Uncharacterized protein OS=Schistosoma mansoni GN=Smp_001590.1 PE=4 SV=1	2	26.604	0.913665	17.0337	17.0025	16.4845	16.8403			15.9266	15.9266
G4VCG4	tr|G4VCG4|G4VCG4_SCHMA Acyl-CoA dehydrogenase OS=Schistosoma mansoni GN=Smp_122930 PE=4 SV=1	11	62.852	0.158677	18.4155	18.1651	19.2202	18.6003	18.7485	17.9758	18.6005	18.4416
G4VCG5	tr|G4VCG5|G4VCG5_SCHMA Uncharacterized protein OS=Schistosoma mansoni GN=Smp_001610 PE=4 SV=1	5	31.186	M only				N/A	19.7911	19.8967	19.1598	19.6159
G4VCH1	tr|G4VCH1|G4VCH1_SCHMA Uncharacterized protein OS=Schistosoma mansoni GN=Smp_122970 PE=4 SV=1	3	56.038	1.06687	18.3482	17.3317	17.8482	17.8427	17.3877	15.716	17.2238	16.7758
G4VCI0	tr|G4VCI0|G4VCI0_SCHMA Putative centaurin alpha OS=Schistosoma mansoni GN=Smp_123030 PE=4 SV=1	7	45.686	-2.90293	15.0383	14.6428	16.2537	15.3116	18.358	18.4596	17.8261	18.2145
G4VCJ0;O02034	tr|G4VCJ0|G4VCJ0_SCHMA Putative amidase OS=Schistosoma mansoni GN=Smp_004220 PE=4 SV=1;tr|O02034|O02034_SCHMA Amidase OS=Schistosoma mansoni PE=2 SV=1	20	67.867	-0.899642	17.8364	18.4248	19.5929	18.618	19.2972	17.9066	21.3492	19.5177
G4VCJ4	tr|G4VCJ4|G4VCJ4_SCHMA Coatomer subunit beta OS=Schistosoma mansoni GN=Smp_124430 PE=4 SV=1	15	106.8	-0.353729	19.0836	19.734	20.0607	19.6261	19.9585	20.1286	19.8524	19.9799
G4VCJ7	tr|G4VCJ7|G4VCJ7_SCHMA Uncharacterized protein OS=Schistosoma mansoni GN=Smp_004280 PE=4 SV=1	3	17.563	-0.0149925	18.7071	18.6588	18.5298	18.6319	18.8486	18.0427	19.0493	18.6469
G4VCJ9	tr|G4VCJ9|G4VCJ9_SCHMA Putative dihydrolipoamide succinyltransferase component of 2-oxoglutarate dehydrogenase OS=Schistosoma mansoni GN=Smp_104330 PE=4 SV=1	10	46.491	-0.167547	21.0378	20.8945	21.1234	21.0185	21.2241	21.4501	20.884	21.1861
G4VCK0	tr|G4VCK0|G4VCK0_SCHMA Putative suppressor of ty OS=Schistosoma mansoni GN=Smp_180420 PE=4 SV=1	10	159.61	0.354893	14.5044	15.0314	15.021	14.8523	13.151	14.0314	16.3098	14.4974
G4VCL1	tr|G4VCL1|G4VCL1_SCHMA Mitochondrial carnitine/acylcarnitine carrier protein-related OS=Schistosoma mansoni GN=Smp_064150 PE=3 SV=1	6	32.436	-0.0445603	13.8632	15.4383	15.4606	14.9207		13.9599	15.9707	14.9653
G4VCL3	tr|G4VCL3|G4VCL3_SCHMA Putative sam/hd domain protein OS=Schistosoma mansoni GN=Smp_147300 PE=4 SV=1	5	62.644	-1.05809	15.9333	14.8047	15.6574	15.4651	15.3689	17.2266	16.9742	16.5232
G4VCM2	tr|G4VCM2|G4VCM2_SCHMA Putative o-linked n-acetylglucosamine transferase, ogt OS=Schistosoma mansoni GN=Smp_046930 PE=4 SV=1	10	119.02	-0.702136	16.629	16.9891	17.5455	17.0545	17.6552	17.8008	17.814	17.7567
G4VCM7	tr|G4VCM7|G4VCM7_SCHMA Uncharacterized protein OS=Schistosoma mansoni GN=Smp_147280 PE=4 SV=1	3	27.116	M only				N/A	17.3025	18.5133	19.1571	18.3243
G4VCN1;G4VCN0	tr|G4VCN1|G4VCN1_SCHMA Putative fatty acid binding protein OS=Schistosoma mansoni GN=Smp_046800.1 PE=4 SV=1;tr|G4VCN0|G4VCN0_SCHMA Putative fatty acid binding protein OS=Schistosoma mansoni GN=Smp_046800.2 PE=4 SV=1	5	15.1	-0.417092	21.2544	22.3437	21.6457	21.7479	22.4307	20.955	23.1093	22.165
G4VCN7	tr|G4VCN7|G4VCN7_SCHMA Putative wd-repeat protein OS=Schistosoma mansoni GN=Smp_046750 PE=4 SV=1	3	27.673	0.725292	17.2837	18.0923	18.5795	17.9851	17.5622	17.3237	16.8937	17.2598
G4VCN8	tr|G4VCN8|G4VCN8_SCHMA Dihydrolipoyl dehydrogenase OS=Schistosoma mansoni GN=Smp_046740 PE=3 SV=1	19	52.868	0.284942	22.9094	23.0886	23.2603	23.0861	22.9203	22.9845	22.4987	22.8012
G4VCQ1;G4VCQ2	tr|G4VCQ1|G4VCQ1_SCHMA Uncharacterized protein OS=Schistosoma mansoni GN=Smp_103810.2 PE=4 SV=1;tr|G4VCQ2|G4VCQ2_SCHMA Uncharacterized protein OS=Schistosoma mansoni GN=Smp_103810.1 PE=4 SV=1	14	76.787	0.62744	21.1572	20.6907	20.7917	20.8798	19.7486	20.6614	20.3473	20.2524
G4VCQ5;Q9BPL0	tr|G4VCQ5|G4VCQ5_SCHMA FTZ-F1 nuclear receptor-like protein OS=Schistosoma mansoni GN=Smp_068780 PE=3 SV=1;tr|Q9BPL0|Q9BPL0_SCHMA FTZ-F1 OS=Schistosoma mansoni GN=FTZ-F1 PE=2 SV=1	4	82.977	-1.36125	16.6208	16.1354	15.1206	15.9589	17.5006	17.0525	17.4073	17.3202
G4VCQ7	tr|G4VCQ7|G4VCQ7_SCHMA Putative aldehyde dehydrogenase OS=Schistosoma mansoni GN=Smp_065060 PE=4 SV=1	18	56.327	-0.140544	22.8387	22.7217	22.9201	22.8268	23.0165	23.1135	22.7721	22.9674
G4VCQ8	tr|G4VCQ8|G4VCQ8_SCHMA Uncharacterized protein OS=Schistosoma mansoni GN=Smp_157290 PE=4 SV=1	6	102.93	-1.47742	16.3253	16.0648		16.195	17.4336	17.3542	18.2296	17.6725
G4VCR1	tr|G4VCR1|G4VCR1_SCHMA Putative leucine zipper-ef-hand containing transmembrane protein OS=Schistosoma mansoni GN=Smp_065110 PE=4 SV=1	24	90.046	-0.00650126	20.8355	20.56	20.9547	20.7834	20.5421	20.3036	21.524	20.7899
G4VCR2	tr|G4VCR2|G4VCR2_SCHMA Putative deoxyhypusine synthase OS=Schistosoma mansoni GN=Smp_065120 PE=4 SV=1	5	42.019	0.0223126	17.797	18.7818	17.6406	18.0731	18.1016	18.6136	17.4372	18.0508
G4VCS0	tr|G4VCS0|G4VCS0_SCHMA Eh domain containing/past-1-related OS=Schistosoma mansoni GN=Smp_065180 PE=3 SV=1	18	58.078	-1.01436	19.8324	19.9505	19.2264	19.6698	20.7672	20.6234	20.6618	20.6841
G4VCS1	tr|G4VCS1|G4VCS1_SCHMA Uncharacterized protein OS=Schistosoma mansoni GN=Smp_065190.2 PE=4 SV=1	3	26.351	-0.638314	20.3963	20.9534	21.2294	20.8597	21.4458	21.6512	21.3971	21.498
G4VCT1	tr|G4VCT1|G4VCT1_SCHMA Uncharacterized protein OS=Schistosoma mansoni GN=Smp_065280 PE=4 SV=1	2	12.723	0.230757	20.8468	20.9692	20.5926	20.8028	20.4562	20.6761	20.584	20.5721
G4VCT7	tr|G4VCT7|G4VCT7_SCHMA Family M13 unassigned peptidase (M13 family) OS=Schistosoma mansoni GN=Smp_157400 PE=4 SV=1	4	27.047	-0.355392	18.1945	17.2691	17.2466	17.5701	17.9208	18.1605	17.6951	17.9255
G4VCT8	tr|G4VCT8|G4VCT8_SCHMA Uncharacterized protein OS=Schistosoma mansoni GN=Smp_157410 PE=4 SV=1	102	529.79	-1.37714	14.9849	16.8583	17.9724	16.6052	18.4769	15.8938	19.5763	17.9823
G4VCU3	tr|G4VCU3|G4VCU3_SCHMA Uncharacterized protein OS=Schistosoma mansoni GN=Smp_065420 PE=4 SV=1	5	32.743	-0.654232	19.2507	18.8944	18.0121	18.7191	19.5832	19.5452	18.9915	19.3733
G4VCV7	tr|G4VCV7|G4VCV7_SCHMA Protein arginine N-methyltransferase OS=Schistosoma mansoni GN=Smp_171150 PE=3 SV=1	6	71.348	0.372629	17.8672	18.3057	18.2866	18.1532	17.6307	18.034	17.677	17.7806
G4VCV8	tr|G4VCV8|G4VCV8_SCHMA Putative sin3b OS=Schistosoma mansoni GN=Smp_171160 PE=4 SV=1	4	158.61	-0.0368632	14.1632	15.7783	15.0521	14.9979	15.1534	14.1084	15.8424	15.0347
G4VCV9	tr|G4VCV9|G4VCV9_SCHMA Putative dead box ATP-dependent RNA helicase OS=Schistosoma mansoni GN=Smp_171170 PE=4 SV=1	7	125.19	-0.82177	14.3466	15.3263	16.2865	15.3198	16.3926	15.0396	16.9924	16.1415
G4VCW4	tr|G4VCW4|G4VCW4_SCHMA Putative fad oxidoreductase OS=Schistosoma mansoni GN=Smp_089880 PE=4 SV=1	4	54.604	0.72231		17.7901	18.0678	17.929	17.4457	17.2823	16.8919	17.2066
G4VCW9	tr|G4VCW9|G4VCW9_SCHMA Putative dna repair/transcription protein met18/mms19 (Fragment) OS=Schistosoma mansoni GN=Smp_171230 PE=4 SV=1	7	124.63	1.96898	15.4872	16.9879	17.0239	16.4997	14.1857	14.9155	14.4908	14.5307
G4VCX2	tr|G4VCX2|G4VCX2_SCHMA Putative thyroid hormone receptor interactor OS=Schistosoma mansoni GN=Smp_171260 PE=4 SV=1	10	162.83	-0.270304	17.0009	17.5001	17.3492	17.2834	17.6035	17.6592	17.3984	17.5537
G4VCY0	tr|G4VCY0|G4VCY0_SCHMA Strictosidine synthase-related OS=Schistosoma mansoni GN=Smp_161220 PE=4 SV=1	2	41.734	-2.03137		16.3929	16.2594	16.3261	18.0095	18.1637	18.8992	18.3575
G4VCY4	tr|G4VCY4|G4VCY4_SCHMA 6-phosphogluconate dehydrogenase, decarboxylating OS=Schistosoma mansoni GN=Smp_071840 PE=3 SV=1	15	41.761	0.779706	22.6477	22.8743	22.8564	22.7928	22.1492	22.0554	21.8347	22.0131
G4VCZ0	tr|G4VCZ0|G4VCZ0_SCHMA Uncharacterized protein OS=Schistosoma mansoni GN=Smp_161170 PE=4 SV=1	3	81.074	-0.496476	16.8053	14.4952	15.3624	15.5543	15.6129		16.4886	16.0508
G4VD00	tr|G4VD00|G4VD00_SCHMA Ubiquitin-specific peptidase 2 (C19 family) OS=Schistosoma mansoni GN=Smp_212390 PE=3 SV=1	2	64.446	M only				N/A	15.7614	16.0354	16.2072	16.0013
G4VD04	tr|G4VD04|G4VD04_SCHMA Uncharacterized protein OS=Schistosoma mansoni GN=Smp_097210 PE=4 SV=1	6	37.487	0.598412	18.5165	18.9499	18.5737	18.68	17.5034	18.7779	17.9636	18.0816
G4VD05	tr|G4VD05|G4VD05_SCHMA Putative lsm1 (Fragment) OS=Schistosoma mansoni GN=Smp_175550 PE=4 SV=1	3	8.009	0.842676	20.7627	20.8878	20.7935	20.8147	20.0588	20.1688	19.6884	19.972
G4VD08	tr|G4VD08|G4VD08_SCHMA Putative ran gtpase-activating protein OS=Schistosoma mansoni GN=Smp_166310 PE=4 SV=1	20	81.26	0.522446	21.4562	21.3167	21.1605	21.3111	20.7972	20.7013	20.8675	20.7887
G4VD10	tr|G4VD10|G4VD10_SCHMA Serine/threonine-protein phosphatase 2A activator OS=Schistosoma mansoni GN=Smp_166290 PE=3 SV=1	8	42.051	-0.441937	21.3452	21.2329	21.1043	21.2275	21.7212	21.9013	21.3857	21.6694
G4VD11	tr|G4VD11|G4VD11_SCHMA Glutaminyl cyclase (M28 family) OS=Schistosoma mansoni GN=Smp_166280 PE=4 SV=1	2	38.806	M only				N/A	16.2876	16.2797	15.7787	16.1153
G4VD15	tr|G4VD15|G4VD15_SCHMA Putative ribosome biogenesis protein bop1 (Block of proliferation 1 protein) OS=Schistosoma mansoni GN=Smp_135120 PE=3 SV=1	10	95.105	4.67138	17.8073	17.7636	18.0607	17.8772		12.3511	14.0606	13.2058
G4VD20	tr|G4VD20|G4VD20_SCHMA Putative dtdp-glucose 4-6-dehydratase OS=Schistosoma mansoni GN=Smp_135100 PE=4 SV=1	3	42.233	0.148418	17.0968	15.7119	15.8437	16.2175	15.4685		16.6696	16.0691
G4VD23;G4VD22	tr|G4VD23|G4VD23_SCHMA Putative microtubule-associated protein OS=Schistosoma mansoni GN=Smp_135080.2 PE=4 SV=1;tr|G4VD22|G4VD22_SCHMA Putative microtubule-associated protein OS=Schistosoma mansoni GN=Smp_135080.1 PE=4 SV=1	21	98.903	0.249128	21.8905	21.7624	21.6793	21.7774	21.6598	21.2949	21.63	21.5283
G4VD25	tr|G4VD25|G4VD25_SCHMA Putative bollus pemphigoid antigen OS=Schistosoma mansoni GN=Smp_135060 PE=4 SV=1	34	222.95	-0.396348	15.5832	18.0572	19.3835	17.6746	18.2327	17.2937	18.6865	18.071
G4VD26	tr|G4VD26|G4VD26_SCHMA Uncharacterized protein OS=Schistosoma mansoni GN=Smp_023860 PE=4 SV=1	9	83.35	0.0213655	15.221	16.3985	16.8709	16.1634		14.81	17.4741	16.1421
G4VD27	tr|G4VD27|G4VD27_SCHMA Uncharacterized protein OS=Schistosoma mansoni GN=Smp_135050 PE=4 SV=1	2	16.112	-0.658405	18.406	18.9224	19.6864	19.0049	19.8154	20.0479	19.1266	19.6633
G4VD37	tr|G4VD37|G4VD37_SCHMA Putative tropomyosin OS=Schistosoma mansoni GN=Smp_044010.1 PE=3 SV=1	14	28.656	-0.206137	20.5542	21.3003	20.9122	20.9222	21.4568	21.6309	20.2975	21.1284
G4VD38	tr|G4VD38|G4VD38_SCHMA Putative bax inhibitor OS=Schistosoma mansoni GN=Smp_044000 PE=3 SV=1	3	30.951	-1.40466		17.3319	17.7044	17.5181	18.9231	18.4217	19.4236	18.9228
G4VD41;G4VD40;G4VD39	tr|G4VD41|G4VD41_SCHMA Basigin related OS=Schistosoma mansoni GN=Smp_043990.2 PE=4 SV=1;tr|G4VD40|G4VD40_SCHMA Basigin related OS=Schistosoma mansoni GN=Smp_043990.3 PE=4 SV=1;tr|G4VD39|G4VD39_SCHMA Basigin related OS=Schistosoma mansoni GN=Smp_043990.1 PE	4	39.054	-2.03061	17.4446	14.6355	16.5449	16.2083	18.3938	18.1083	18.2147	18.2389
G4VD45	tr|G4VD45|G4VD45_SCHMA Tetraspanin OS=Schistosoma mansoni GN=Smp_142230 PE=3 SV=1	2	36.741	M only				N/A	17.0028	17.1949	16.8982	17.032
G4VD46	tr|G4VD46|G4VD46_SCHMA Putative dna-directed RNA polymerase I OS=Schistosoma mansoni GN=Smp_004640 PE=4 SV=1	8	55.033	0.372019	18.9014	18.753	18.3184	18.6576	17.8492	17.9851	19.0224	18.2856
G4VD48	tr|G4VD48|G4VD48_SCHMA Putative dna2/nam7 helicase family member OS=Schistosoma mansoni GN=Smp_124640 PE=4 SV=1	9	175.51	1.33428	14.6751	16.7072	16.0537	15.812	15.143	12.3718	15.9184	14.4777
G4VD59;G4VD58;Q7JQ21;Q26583;G4VD60	tr|G4VD59|G4VD59_SCHMA Peptidylprolyl isomerase OS=Schistosoma mansoni GN=Smp_004780.1 PE=4 SV=1;tr|G4VD58|G4VD58_SCHMA Peptidylprolyl isomerase OS=Schistosoma mansoni GN=Smp_004780.2 PE=4 SV=1;tr|Q7JQ21|Q7JQ21_SCHMA Peptidylprolyl isomerase OS=Schistosoma	35	48.123	-0.933396	25.363	25.036	25.102	25.167	26.1741	26.4258	25.7013	26.1004
G4VD69	tr|G4VD69|G4VD69_SCHMA Uncharacterized protein OS=Schistosoma mansoni GN=Smp_128300 PE=4 SV=1	1	9.3016	-0.0471701	16.9919	17.6622	17.3924	17.3488		17.396		17.396
G4VD74;G4VD73	tr|G4VD74|G4VD74_SCHMA Uncharacterized protein OS=Schistosoma mansoni GN=Smp_128280.2 PE=4 SV=1;tr|G4VD73|G4VD73_SCHMA Uncharacterized protein OS=Schistosoma mansoni GN=Smp_128280.1 PE=4 SV=1	26	76.678	-0.370623	20.7983	21.1775	21.0764	21.0174	21.4122	21.5604	21.1916	21.388
G4VD77	tr|G4VD77|G4VD77_SCHMA Uncharacterized protein OS=Schistosoma mansoni GN=Smp_128230 PE=4 SV=1	6	59.456	-2.74778	16.8999	17.2294	16.1472	16.7588	19.4798	19.9346	19.1054	19.5066
G4VD81;G4VD80	tr|G4VD81|G4VD81_SCHMA Kinesin-like protein OS=Schistosoma mansoni GN=Smp_128200.2 PE=3 SV=1;tr|G4VD80|G4VD80_SCHMA Kinesin-like protein OS=Schistosoma mansoni GN=Smp_128200.1 PE=3 SV=1	8	97.229	-1.79306	14.4593	15.3135	14.2228	14.6652	15.4982		17.4183	16.4583
G4VD88	tr|G4VD88|G4VD88_SCHMA Glycosylphosphatidylinositol:protein transamidase (C13 family) OS=Schistosoma mansoni GN=Smp_011230 PE=4 SV=1	3	27.913	-0.894114	16.8149	18.0007	18.3245	17.7134	18.9546	19.0164	17.8515	18.6075
G4VD97	tr|G4VD97|G4VD97_SCHMA Putative polybromo-1 OS=Schistosoma mansoni GN=Smp_128120 PE=4 SV=1	11	235.34	-0.647334	14.7261	14.4505	16.6094	15.262	15.952	15.4691	16.3069	15.9093
G4VD99	tr|G4VD99|G4VD99_SCHMA Methionine aminopeptidase 2 OS=Schistosoma mansoni GN=Smp_011120 PE=3 SV=1	15	51.94	0.779136	21.2135	20.9634	20.8377	21.0049	20.3137	20.1399	20.2237	20.2258
G4VDA2	tr|G4VDA2|G4VDA2_SCHMA Putative m16 family peptidase OS=Schistosoma mansoni GN=Smp_146010 PE=4 SV=1	9	104.64	1.0817	17.5267	17.6326	18.0631	17.7408	16.9303	16.5215	16.5256	16.6591
G4VDA4;G4VDA3	tr|G4VDA4|G4VDA4_SCHMA Putative fibrillarin OS=Schistosoma mansoni GN=Smp_044280.1 PE=3 SV=1;tr|G4VDA3|G4VDA3_SCHMA Putative fibrillarin OS=Schistosoma mansoni GN=Smp_044280.2 PE=4 SV=1	13	35.549	0.830515	20.8383	20.6672	21.3227	20.9427	19.6661	19.2462	21.4244	20.1122
G4VDB2	tr|G4VDB2|G4VDB2_SCHMA Putative rab geranylgeranyl transferase alpha subunit OS=Schistosoma mansoni GN=Smp_208010 PE=4 SV=1	11	74.594	-0.404167	17.1458	17.9477	17.923	17.6721	18.5774	17.8316	17.82	18.0763
G4VDB4	tr|G4VDB4|G4VDB4_SCHMA Mitotic checkpoint protein-related OS=Schistosoma mansoni GN=Smp_044400 PE=4 SV=1	6	41.301	-1.54192	16.6845	16.0585	15.792	16.1784	16.9655	17.7437	18.4517	17.7203
G4VDC3	tr|G4VDC3|G4VDC3_SCHMA Uncharacterized protein OS=Schistosoma mansoni GN=Smp_125500 PE=4 SV=1	16	56.532	-0.177031	20.0116	20.4976	20.8255	20.4449	20.9027	19.7136	21.2496	20.6219
G4VDC8	tr|G4VDC8|G4VDC8_SCHMA Uncharacterized protein OS=Schistosoma mansoni GN=Smp_143610 PE=4 SV=1	3	754.02	-2.06705	11.917	10.0334	13.1055	11.6853		13.13	14.3747	13.7523
G4VDD0	tr|G4VDD0|G4VDD0_SCHMA Uncharacterized protein OS=Schistosoma mansoni GN=Smp_143590 PE=4 SV=1	13	70.361	M only				N/A	19.1191	17.7224	20.1285	18.99
G4VDD2	tr|G4VDD2|G4VDD2_SCHMA Eukaryotic translation initiation factor 5A OS=Schistosoma mansoni GN=Smp_039400 PE=3 SV=1	7	17.752	1.10763	25.4267	25.3577	24.937	25.2405	24.1333	24.4151	23.8502	24.1328
G4VDD3	tr|G4VDD3|G4VDD3_SCHMA Uncharacterized protein OS=Schistosoma mansoni GN=Smp_039390 PE=4 SV=1	4	35.627	0.533361	17.4685	17.0513	18.2013	17.5737	16.6852	16.648	17.7878	17.0403
G4VDE3	tr|G4VDE3|G4VDE3_SCHMA DNA helicase OS=Schistosoma mansoni GN=Smp_143490 PE=3 SV=1	14	83.614	-0.82028	18.8902	19.0667	19.22	19.059	19.7843	19.9669	19.8865	19.8792
G4VDE6;G4VDE5	tr|G4VDE6|G4VDE6_SCHMA Spectrin beta chain OS=Schistosoma mansoni GN=Smp_143470.2 PE=3 SV=1;tr|G4VDE5|G4VDE5_SCHMA Putative spectrin beta chain, brain 3 (Spectrin, non-erythroid beta chain 3) (Beta-IV spectrin) OS=Schistosoma mansoni GN=Smp_143470.1 PE=4 S	106	270.81	-1.29903	21.7111	21.8834	21.9431	21.8459	23.0865	23.1553	23.1929	23.1449
G4VDE7	tr|G4VDE7|G4VDE7_SCHMA Uncharacterized protein OS=Schistosoma mansoni GN=Smp_143460 PE=4 SV=1	11	53.093	0.0886606	20.9655	20.4393	20.6501	20.685	20.8637	19.6539	21.2714	20.5963
G4VDE9	tr|G4VDE9|G4VDE9_SCHMA Uncharacterized protein OS=Schistosoma mansoni GN=Smp_102280 PE=4 SV=1	4	26.064	1.04555	19.4556	20.1678	19.0549	19.5594	18.5544	18.8976	18.0897	18.5139
G4VDF0	tr|G4VDF0|G4VDF0_SCHMA Putative exosome complex exonuclease rrp42 (Ribosomal rna processing protein 42) OS=Schistosoma mansoni GN=Smp_179010 PE=4 SV=1	4	27.876	0.506544	19.1021	18.9459	19.5359	19.1946	18.4673	18.7967	18.8002	18.6881
G4VDF4	tr|G4VDF4|G4VDF4_SCHMA Putative translation initiation factor IF-2 OS=Schistosoma mansoni GN=Smp_006990 PE=4 SV=1	14	73.622	0.485496	19.9942	20.2502	20.4679	20.2375	19.8335	19.354	20.0683	19.752
G4VDF5	tr|G4VDF5|G4VDF5_SCHMA Putative partner of sld5 OS=Schistosoma mansoni GN=Smp_007000 PE=4 SV=1	4	24.309	F only	15.8555	16.3577	15.6182	15.9438				N/A
G4VDG3;G4VDG2;G4VDG1	tr|G4VDG3|G4VDG3_SCHMA Proteasome subunit alpha type OS=Schistosoma mansoni GN=Smp_032580.2 PE=3 SV=1;tr|G4VDG2|G4VDG2_SCHMA Proteasome subunit alpha type OS=Schistosoma mansoni GN=Smp_032580.3 PE=3 SV=1;tr|G4VDG1|G4VDG1_SCHMA Proteasome subunit alpha type	18	27.27	-0.100083	24.1379	24.2189	23.878	24.0783	24.2222	24.1737	24.1391	24.1783
G4VDG4	tr|G4VDG4|G4VDG4_SCHMA Serine/threonine kinase OS=Schistosoma mansoni GN=Smp_139800 PE=4 SV=1	15	141.16	-1.95633	12.6788		16.768	14.7234	16.1901	16.4846	17.3645	16.6797
G4VDG5	tr|G4VDG5|G4VDG5_SCHMA Putative ubiquitin-protein ligase BRE1 OS=Schistosoma mansoni GN=Smp_139810 PE=4 SV=1	33	193.06	-1.57598	20.3434	20.3996	20.3569	20.3666	21.9874	22.2067	21.6338	21.9426
G4VDH7	tr|G4VDH7|G4VDH7_SCHMA Putative ribosomal protein S11 OS=Schistosoma mansoni GN=Smp_032760 PE=3 SV=1	7	16.865	0.758663	23.6712	23.599	23.939	23.7364	23.1282	22.0134	23.7916	22.9777
G4VDI0	tr|G4VDI0|G4VDI0_SCHMA Putative dolichyl-phosphate beta-glucosyltransferase ((EC 2.4.1.117) dolp-glucosyltransferase) OS=Schistosoma mansoni GN=Smp_032780 PE=4 SV=1	5	48.733	-1.63469	15.6699	18.3849	19.1373	17.7307	19.1551	19.1951	19.7458	19.3654
G4VDI3;G4VDI2	tr|G4VDI3|G4VDI3_SCHMA Putative wd-repeat protein OS=Schistosoma mansoni GN=Smp_032800.1 PE=4 SV=1;tr|G4VDI2|G4VDI2_SCHMA Putative smu-1 suppressor of mec-8 and unc-52 homolog OS=Schistosoma mansoni GN=Smp_032800.2 PE=4 SV=1	2	57.261	0.524652	16.5695	16.3868	17.2705	16.7423	16.0469	16.2889	16.3171	16.2176
G4VDI4	tr|G4VDI4|G4VDI4_SCHMA Thymidylate kinase OS=Schistosoma mansoni GN=Smp_032810 PE=3 SV=1	15	26.687	0.607999	23.1913	23.1407	22.9348	23.0889	22.4616	22.6905	22.2906	22.4809
G4VDI5;G4VDI6	tr|G4VDI5|G4VDI5_SCHMA Putative smu-1 suppressor of mec-8 and unc-52 homolog OS=Schistosoma mansoni GN=Smp_032820.2 PE=4 SV=1;tr|G4VDI6|G4VDI6_SCHMA Putative wd-repeat protein OS=Schistosoma mansoni GN=Smp_032820.1 PE=4 SV=1	4	51.762	-0.0236141	17.4257	17.1684	18.6756	17.7565	18.0226	17.8195	17.4983	17.7802
G4VDI7	tr|G4VDI7|G4VDI7_SCHMA Putative lysophosphatidic acid phosphatase OS=Schistosoma mansoni GN=Smp_139900 PE=3 SV=1	3	27.477	0.161169	15.5523	17.851	18.089	17.1641	17.6629		16.343	17.0029
G4VDJ0	tr|G4VDJ0|G4VDJ0_SCHMA Cdc50-related OS=Schistosoma mansoni GN=Smp_210250 PE=4 SV=1	2	36.865	-1.47086	15.7378	15.971	16.4767	16.0618	17.5612	17.925	17.1118	17.5327
G4VDJ1	tr|G4VDJ1|G4VDJ1_SCHMA Ccr4 not-related OS=Schistosoma mansoni GN=Smp_088600 PE=4 SV=1	2	91.274	-0.413663	16.8806	16.9658	15.473	16.4398	16.6736	16.9302	16.9566	16.8535
G4VDJ6	tr|G4VDJ6|G4VDJ6_SCHMA Putative adp-ribosylation factor, arf OS=Schistosoma mansoni GN=Smp_088650 PE=3 SV=1	8	20.748	-0.0343989	21.2109	21.4919	21.6447	21.4492	21.4374	21.2252	21.7882	21.4836
G4VDJ9	tr|G4VDJ9|G4VDJ9_SCHMA VPS13C protein, putative OS=Schistosoma mansoni GN=Smp_021170 PE=4 SV=1	31	398.25	0.155161	14.2391	15.4338	15.3827	15.0185	13.9554	14.4737	16.161	14.8634
G4VDK0	tr|G4VDK0|G4VDK0_SCHMA Putative peptidyl-prolyl cis-trans isomerase OS=Schistosoma mansoni GN=Smp_021160.1 PE=4 SV=1	5	62.318	1.21107	16.9996	16.0259	16.1887	16.4047	15.1937			15.1937
G4VDK2	tr|G4VDK2|G4VDK2_SCHMA 40S ribosomal protein S7 OS=Schistosoma mansoni GN=Smp_021140 PE=3 SV=1	11	23.084	0.656161	23.365	23.2494	23.4218	23.3454	22.8047	21.8716	23.3914	22.6892
G4VDK3	tr|G4VDK3|G4VDK3_SCHMA Uncharacterized protein OS=Schistosoma mansoni GN=Smp_021130 PE=4 SV=1	2	44.911	1.1488	16.9392	16.7237	16.4284	16.6971	15.6761		15.4205	15.5483
G4VDK9	tr|G4VDK9|G4VDK9_SCHMA Putative 60s ribosomal protein L10, mitochondrial OS=Schistosoma mansoni GN=Smp_021080.1 PE=4 SV=1	3	33.12	0.776503	19.2775	18.6061	17.4361	18.4399	17.632	18.2615	17.0967	17.6634
G4VDL0	tr|G4VDL0|G4VDL0_SCHMA Putative gtp-binding protein-animal OS=Schistosoma mansoni GN=Smp_021070 PE=4 SV=1	12	46.021	2.88359	19.5884	19.2023	19.4772	19.4226	15.6966	16.1946	17.7259	16.539
G4VDL3	tr|G4VDL3|G4VDL3_SCHMA Putative utp-glucose-1-phosphate uridylyltransferase 2 (Udp-glucose pyrophosphorylase 2) OS=Schistosoma mansoni GN=Smp_133600 PE=4 SV=1	14	52.728	-2.72498	17.4116	19.1791	17.7656	18.1188	20.7377	20.702	21.0916	20.8437
G4VDN2	tr|G4VDN2|G4VDN2_SCHMA Putative cytosolic purine 5-nucleotidase OS=Schistosoma mansoni GN=Smp_147840 PE=4 SV=1	21	62.265	-1.68115	19.3216	20.0521	19.9562	19.7766	21.5987	21.3932	21.3815	21.4578
G4VDN8	tr|G4VDN8|G4VDN8_SCHMA Putative dead box ATP-dependent RNA helicase OS=Schistosoma mansoni GN=Smp_095920 PE=4 SV=1	6	63.958	0.617617	12.9666	15.8935	16.1026	14.9875			14.3699	14.3699
G4VDP3	tr|G4VDP3|G4VDP3_SCHMA Putative myosin regulatory light chain 2 smooth muscle OS=Schistosoma mansoni GN=Smp_103000.1 PE=4 SV=1	4	8.6316	-0.190301	20.4576	19.8602	18.985	19.7676	19.5192		20.3966	19.9579
G4VDP7	tr|G4VDP7|G4VDP7_SCHMA Glyoxalase I (Lactoylglutathione lyase) OS=Schistosoma mansoni GN=Smp_001410.1 PE=4 SV=1	12	28.227	-0.455705	23.7667	23.8567	23.3556	23.6596	24.2565	24.1217	23.9678	24.1154
G4VDP8	tr|G4VDP8|G4VDP8_SCHMA Uncharacterized protein OS=Schistosoma mansoni GN=Smp_088660 PE=4 SV=1	4	32.893	0.28446	18.5625	18.1002	18.1182	18.2603	18.0797	18.0329	17.8149	17.9758
G4VDP9	tr|G4VDP9|G4VDP9_SCHMA Nicalin (M28 family) OS=Schistosoma mansoni GN=Smp_170400 PE=4 SV=1	10	78.906	-0.177414	16.0455	15.9231	17.7011	16.5566	17.2864	15.3147	17.6009	16.734
G4VDR2	tr|G4VDR2|G4VDR2_SCHMA Putative ubiquitin-conjugating enzyme E2-25kD OS=Schistosoma mansoni GN=Smp_082050 PE=3 SV=1	5	24.845	-0.0486081	19.8977	19.8612	18.3862	19.3817	19.1553	19.9504	19.1852	19.4303
G4VDR3	tr|G4VDR3|G4VDR3_SCHMA Nuclear cap-binding protein subunit 2 OS=Schistosoma mansoni GN=Smp_166430 PE=3 SV=1	4	17.762	0.451986	21.7583	21.13	21.6739	21.5207	21.0044	20.8848	21.3171	21.0688
G4VDR4	tr|G4VDR4|G4VDR4_SCHMA Family C56 non-peptidase homologue (C56 family) OS=Schistosoma mansoni GN=Smp_082030 PE=4 SV=1	9	19.091	0.361376	24.8022	25.0805	24.7112	24.8646	24.6302	24.7506	24.129	24.5033
G4VDR5	tr|G4VDR5|G4VDR5_SCHMA Uncharacterized protein OS=Schistosoma mansoni GN=Smp_166420 PE=4 SV=1	3	78.459	M only				N/A	16.7172	15.5171	16.2158	16.15
G4VDR7	tr|G4VDR7|G4VDR7_SCHMA Putative dead box ATP-dependent RNA helicase OS=Schistosoma mansoni GN=Smp_166400 PE=3 SV=1	6	38.791	-2.08988	15.9699	17.0698	18.1195	17.0531	19.112	19.3667	18.9501	19.1429
G4VDS7	tr|G4VDS7|G4VDS7_SCHMA Putative chromobox protein OS=Schistosoma mansoni GN=Smp_179650.1 PE=4 SV=1	16	27.397	-0.576403	23.9729	23.7861	23.4661	23.7417	24.3397	24.4416	24.173	24.3181
G4VDS8	tr|G4VDS8|G4VDS8_SCHMA Putative chromobox protein OS=Schistosoma mansoni GN=Smp_179650.2 PE=4 SV=1	1	27.269	-0.714679		18.5463	18.9033	18.7248	19.439	19.6102	19.2692	19.4395
G4VDS9	tr|G4VDS9|G4VDS9_SCHMA Uncharacterized protein OS=Schistosoma mansoni GN=Smp_179660 PE=4 SV=1	2	103.41	0.3467	14.4853			14.4853	15.7113	13.3313	13.3733	14.1386
G4VDT0	tr|G4VDT0|G4VDT0_SCHMA Putative gyf domain OS=Schistosoma mansoni GN=Smp_093430 PE=4 SV=1	4	122.73	-0.963527	16.2387	15.7824	16.4408	16.154	17.0949	17.0701	17.1875	17.1175
G4VDT5	tr|G4VDT5|G4VDT5_SCHMA Family C2 unassigned peptidase (C02 family) OS=Schistosoma mansoni GN=Smp_089460.1 PE=3 SV=1	1	87.676	-1.63123	15.0569	15.5248	16.3633	15.6484	17.2639	16.638	17.9369	17.2796
G4VDT6	tr|G4VDT6|G4VDT6_SCHMA Family C2 unassigned peptidase (C02 family) OS=Schistosoma mansoni GN=Smp_089460.2 PE=3 SV=1	49	88.361	-0.483282	22.3188	22.6145	22.4153	22.4495	22.9133	23.1298	22.7553	22.9328
G4VDT8	tr|G4VDT8|G4VDT8_SCHMA Uncharacterized protein OS=Schistosoma mansoni GN=Smp_170950 PE=4 SV=1	3	39.5	0.332364	16.2786	14.5627	15.6972	15.5129	15.2724	15.5182	14.7508	15.1805
G4VDU0	tr|G4VDU0|G4VDU0_SCHMA Uncharacterized protein OS=Schistosoma mansoni GN=Smp_170980 PE=4 SV=1	3	84.663	M only				N/A	16.2473	17.0165	21.2096	18.1578
G4VDU1	tr|G4VDU1|G4VDU1_SCHMA Putative vinculin OS=Schistosoma mansoni GN=Smp_170990 PE=4 SV=1	21	172.71	1.19968	19.7484	22.5442	19.1673	20.4866	18.8456	19.6538	19.3614	19.2869
G4VDU3	tr|G4VDU3|G4VDU3_SCHMA Putative eif5b-like protein OS=Schistosoma mansoni GN=Smp_089550 PE=4 SV=1	3	10.89	1.1353	22.041	21.0721	22.0437	21.7189	20.9142	19.8838	20.9529	20.5836
G4VDV2	tr|G4VDV2|G4VDV2_SCHMA Prefoldin subunit 3 OS=Schistosoma mansoni GN=Smp_021800 PE=3 SV=1	7	21.491	0.524041	22.141	22.0757	21.6993	21.972	21.6342	21.693	21.0165	21.4479
G4VDW4	tr|G4VDW4|G4VDW4_SCHMA Putative lupus la ribonucleoprotein OS=Schistosoma mansoni GN=Smp_122800 PE=4 SV=1	4	122.15	0.794686	15.6852	14.9021	14.833	15.1401			14.3454	14.3454
G4VDW6	tr|G4VDW6|G4VDW6_SCHMA Putative leucyl-tRNA synthetase OS=Schistosoma mansoni GN=Smp_122780 PE=3 SV=1	6	106.93	0.608671	15.8945	15.9594	15.9037	15.9192	15.7872	14.3507	15.7938	15.3105
G4VDY2	tr|G4VDY2|G4VDY2_SCHMA Uncharacterized protein OS=Schistosoma mansoni GN=Smp_122730 PE=4 SV=1	5	96.255	0.250704	18.0273	17.5621	17.9145	17.8346	18.0776	16.6573	18.0169	17.5839
G4VDY5;A0A0E3T038	tr|G4VDY5|G4VDY5_SCHMA Uncharacterized protein OS=Schistosoma mansoni GN=Smp_173540 PE=3 SV=1;tr|A0A0E3T038|A0A0E3T038_SCHMA Integrin OS=Schistosoma mansoni GN=alpha-Int4 PE=2 SV=1	3	134.74	M only				N/A	16.4679	14.7283	16.0096	15.7353
G4VDY8	tr|G4VDY8|G4VDY8_SCHMA Putative dachshund homolog OS=Schistosoma mansoni GN=Smp_180990 PE=4 SV=1	2	46.013	0.198054	16.5885	16.1982	15.8974	16.228	14.5435	16.9039	16.6426	16.03
G4VDZ2	tr|G4VDZ2|G4VDZ2_SCHMA Putative replication factor C / DNA polymerase III gamma-tau subunit OS=Schistosoma mansoni GN=Smp_066260 PE=4 SV=1	10	36.199	-0.142655	19.5543	20.1598	20.0084	19.9075	20.1785	20.1727	19.7993	20.0502
G4VDZ3	tr|G4VDZ3|G4VDZ3_SCHMA Putative 60s ribosomal protein L7a OS=Schistosoma mansoni GN=Smp_210310 PE=4 SV=1	8	17.486	0.345654	20.6671	21.4369	21.0039	21.036	21.0777	17.4474	23.5459	20.6903
G4VDZ4	tr|G4VDZ4|G4VDZ4_SCHMA Putative 60s ribosomal protein L7a OS=Schistosoma mansoni GN=Smp_210300 PE=4 SV=1	8	82.82	0.817075	20.1034	19.534	20.0987	19.912	18.4896	16.7007	22.0946	19.0949
G4VE01	tr|G4VE01|G4VE01_SCHMA Uncharacterized protein OS=Schistosoma mansoni GN=Smp_146950 PE=4 SV=1	60	301.89	-3.18704	16.8523	16.6127	16.9705	16.8118	21.4847	19.9304	18.5814	19.9989
G4VE06	tr|G4VE06|G4VE06_SCHMA Putative phosphatidylcholine transfer protein OS=Schistosoma mansoni GN=Smp_146970 PE=2 SV=1	2	18.063	-0.291837	18.8338	18.6744	18.2466	18.585	19.0014	19.3055	18.3235	18.8768
G4VE11	tr|G4VE11|G4VE11_SCHMA 2-methoxy-6-polyprenyl-1,4-benzoquinol methylase, mitochondrial OS=Schistosoma mansoni GN=Smp_021910 PE=3 SV=1	2	32.821	0.190293	18.4914	18.3393	18.4594	18.43	18.1828	18.4865	18.0499	18.2397
G4VE12;G4VE13	tr|G4VE12|G4VE12_SCHMA Putative paramyosin OS=Schistosoma mansoni GN=Smp_021920.1 PE=4 SV=1;tr|G4VE13|G4VE13_SCHMA Putative paramyosin OS=Schistosoma mansoni GN=Smp_021920.3 PE=4 SV=1	2	84.176	0.45209	20.3124	20.3087	19.9698	20.197	19.5768	20.256	19.4018	19.7449
G4VE14	tr|G4VE14|G4VE14_SCHMA Putative zinc finger protein OS=Schistosoma mansoni GN=Smp_134010.1 PE=4 SV=1	11	38.821	0.701412	22.2016	22.0573	21.5957	21.9515	21.3161	21.5453	20.889	21.2501
G4VE15	tr|G4VE15|G4VE15_SCHMA Putative cell division cycle OS=Schistosoma mansoni GN=Smp_134020 PE=4 SV=1	9	87.328	-0.225349	16.2766	16.416	16.8899	16.5275	17.1235	16.1922	16.9427	16.7528
G4VE17;G4VE16	tr|G4VE17|G4VE17_SCHMA Putative suppressor of hairy wing homolog OS=Schistosoma mansoni GN=Smp_021950.1 PE=4 SV=1;tr|G4VE16|G4VE16_SCHMA Putative suppressor of hairy wing homolog OS=Schistosoma mansoni GN=Smp_021950.2 PE=4 SV=1	5	48.534	-0.613433	18.0986	18.1271	18.5173	18.2477	18.4427	19.3523	18.7883	18.8611
G4VE33	tr|G4VE33|G4VE33_SCHMA Putative ribose-phosphate pyrophosphokinase 1 OS=Schistosoma mansoni GN=Smp_022090 PE=3 SV=1	12	34.793	0.146862	21.5737	21.9306	21.3582	21.6208	21.6337	21.6598	21.1284	21.474
G4VE41	tr|G4VE41|G4VE41_SCHMA Putative pre-mRNA-splicing factor CWC25 OS=Schistosoma mansoni GN=Smp_105180 PE=4 SV=1	2	38.092	-0.712228	18.0248	17.524	16.2181	17.2556			17.9678	17.9678
G4VE45	tr|G4VE45|G4VE45_SCHMA tRNA (guanine-N(7)-)-methyltransferase non-catalytic subunit OS=Schistosoma mansoni GN=Smp_104630 PE=3 SV=1	6	44.868	-0.377286	18.1636	18.856	18.9962	18.672	18.9341	19.1852	19.0284	19.0492
G4VE48;G4VE49	tr|G4VE48|G4VE48_SCHMA Uncharacterized protein OS=Schistosoma mansoni GN=Smp_104600.2 PE=4 SV=1;tr|G4VE49|G4VE49_SCHMA Uncharacterized protein OS=Schistosoma mansoni GN=Smp_104600.1 PE=4 SV=1	7	95.685	-0.0613145	17.5903	17.9311	17.9164	17.8126	17.949	17.7185	17.9541	17.8739
G4VE51	tr|G4VE51|G4VE51_SCHMA Ribulose-phosphate 3-epimerase OS=Schistosoma mansoni GN=Smp_104580 PE=3 SV=1	5	25.447	1.95684	19.9895	20.6181	19.3533	19.987	18.3208	17.906	17.8636	18.0301
G4VE54;G4VE53	tr|G4VE54|G4VE54_SCHMA Uncharacterized protein OS=Schistosoma mansoni GN=Smp_037460.2 PE=4 SV=1;tr|G4VE53|G4VE53_SCHMA Uncharacterized protein OS=Schistosoma mansoni GN=Smp_037460.1 PE=4 SV=1	4	54.622	F only	17.7646	16.2688	17.2106	17.0813				N/A
G4VE55	tr|G4VE55|G4VE55_SCHMA Uncharacterized protein OS=Schistosoma mansoni GN=Smp_142380 PE=4 SV=1	11	170.49	1.12763	17.3345	17.5911	17.6452	17.5236	15.8601	16.0746	17.2533	16.396
G4VE62;B9P3Q8;G4VE61	tr|G4VE62|G4VE62_SCHMA Putative alpha-amylase OS=Schistosoma mansoni GN=Smp_037540.2 PE=4 SV=1;tr|B9P3Q8|B9P3Q8_SCHMA Permease 1 heavy chain OS=Schistosoma mansoni PE=2 SV=1;tr|G4VE61|G4VE61_SCHMA Putative alpha-amylase OS=Schistosoma mansoni GN=Smp_037540	15	71.586	-0.807902	19.684	20.1219	19.8613	19.8891	20.7857	20.6893	20.6159	20.697
G4VE67	tr|G4VE67|G4VE67_SCHMA Putative rap1 and OS=Schistosoma mansoni GN=Smp_142450 PE=4 SV=1	4	20.774	-1.23093	19.4633	19.4112	19.7406	19.5384	20.6019	21.0046	20.7015	20.7693
G4VE68	tr|G4VE68|G4VE68_SCHMA DNA helicase OS=Schistosoma mansoni GN=Smp_037590 PE=3 SV=1	26	91.712	-0.801212	19.7045	19.7388	19.3764	19.6066	20.1591	21.161	19.9031	20.4078
G4VE73	tr|G4VE73|G4VE73_SCHMA Uncharacterized protein OS=Schistosoma mansoni GN=Smp_037640 PE=4 SV=1	4	48.679	-0.733255	17.7184	18.094	17.4416	17.7513	18.2964	19.0842	18.0733	18.4846
G4VE80	tr|G4VE80|G4VE80_SCHMA Nicotinate phosphoribosyltransferase related pre-B cell enhancing factor OS=Schistosoma mansoni GN=Smp_017230 PE=4 SV=1	9	52.667	-0.0549184	18.2533	17.9531	18.1068	18.1044	18.2386	18.7003	17.5392	18.1593
G4VE82	tr|G4VE82|G4VE82_SCHMA Protein kinase OS=Schistosoma mansoni GN=Smp_131630 PE=4 SV=1	10	114.67	M only				N/A	13.8315	14.6841	17.878	15.4645
G4VE86;G4VE85	tr|G4VE86|G4VE86_SCHMA Uncharacterized protein OS=Schistosoma mansoni GN=Smp_017290.4 PE=4 SV=1;tr|G4VE85|G4VE85_SCHMA Uncharacterized protein OS=Schistosoma mansoni GN=Smp_017290.3 PE=4 SV=1	3	20.774	-1.55984	18.1334	18.0205	17.5427	17.8989	19.4597	19.7813	19.1351	19.4587
G4VE88	tr|G4VE88|G4VE88_SCHMA Jab1/MPN domain metalloenzyme (M67 family) OS=Schistosoma mansoni GN=Smp_131660 PE=4 SV=1	7	39.06	-0.13856	19.0777	19.1581	19.1728	19.1362	19.1365	19.5356	19.1521	19.2747
G4VE92;Q94757	tr|G4VE92|G4VE92_SCHMA Putative t-complex protein 1 subunit alpha (TCP-1-alpha) (CCT-alpha) OS=Schistosoma mansoni GN=Smp_017360 PE=3 SV=1;sp|Q94757|TCPA_SCHMA T-complex protein 1 subunit alpha OS=Schistosoma mansoni GN=TCP-1A PE=2 SV=1	29	60.081	0.203703	24.2171	24.3443	24.4219	24.3278	24.1162	24.4642	23.7918	24.1241
G4VEA9;G4VEB0;G4VHI7	tr|G4VEA9|G4VEA9_SCHMA Putative 60s ribosomal protein L21 OS=Schistosoma mansoni GN=Smp_022560.2 PE=4 SV=1;tr|G4VEB0|G4VEB0_SCHMA Putative 60s ribosomal protein L21 OS=Schistosoma mansoni GN=Smp_022560.1 PE=4 SV=1;tr|G4VHI7|G4VHI7_SCHMA Putative voltage-ga	7	18.579	1.07597	24.1499	23.7027	23.4549	23.7691	22.6266	21.3512	24.1017	22.6932
G4VEB8	tr|G4VEB8|G4VEB8_SCHMA Putative wd-repeat protein OS=Schistosoma mansoni GN=Smp_022660 PE=4 SV=1	2	54.685	1.6683	17.5051	17.7835	17.3916	17.5601	15.9863	16.1341	15.555	15.8918
G4VEC5	tr|G4VEC5|G4VEC5_SCHMA Putative kif1 OS=Schistosoma mansoni GN=Smp_134330 PE=4 SV=1	1	28.438	-0.165491	17.6771	17.697	17.6472	17.6738	17.7344	17.8483	17.935	17.8392
G4VEC8;G4VEC9;G4VED0	tr|G4VEC8|G4VEC8_SCHMA Putative set and mynd domain containing OS=Schistosoma mansoni GN=Smp_121610.3 PE=4 SV=1;tr|G4VEC9|G4VEC9_SCHMA Putative set and mynd domain containing OS=Schistosoma mansoni GN=Smp_121610.1 PE=4 SV=1;tr|G4VED0|G4VED0_SCHMA Putative	2	47.317	0.893639	17.6102	18.418	18.1047	18.0443	16.4091	18.4136	16.6292	17.1507
G4VEE4	tr|G4VEE4|G4VEE4_SCHMA Putative ef hand containing protein OS=Schistosoma mansoni GN=Smp_147680 PE=4 SV=1	6	38.191	1.77269	18.496	19.4602	18.4569	18.8043	17.8268	15.5487	17.7195	17.0317
G4VEF2	tr|G4VEF2|G4VEF2_SCHMA Uncharacterized protein OS=Schistosoma mansoni GN=Smp_140640 PE=4 SV=1	1	65.057	-0.768891	13.6209	13.8455	13.9799	13.8154	14.1822		14.9864	14.5843
G4VEF4;G4VEF3	tr|G4VEF4|G4VEF4_SCHMA Putative dead box ATP-dependent RNA helicase OS=Schistosoma mansoni GN=Smp_034190.1 PE=3 SV=1;tr|G4VEF3|G4VEF3_SCHMA Putative dead box ATP-dependent RNA helicase OS=Schistosoma mansoni GN=Smp_034190.2 PE=3 SV=1	14	46.005	0.281154	21.0815	21.4076	21.5113	21.3335	21.3208	20.731	21.1052	21.0523
G4VEG1;G4VEG2	tr|G4VEG1|G4VEG1_SCHMA Endothelial differentiation-related factor 1 OS=Schistosoma mansoni GN=Smp_140680.1 PE=4 SV=1;tr|G4VEG2|G4VEG2_SCHMA Endothelial differentiation-related factor 1 OS=Schistosoma mansoni GN=Smp_140680.2 PE=4 SV=1	2	15.006	1.24703	21.6382	21.461	21.1495	21.4162	19.8674	20.0576	20.5826	20.1692
G4VEH8;G4VEH9	tr|G4VEH8|G4VEH8_SCHMA Protein YIPF OS=Schistosoma mansoni GN=Smp_013300.2 PE=3 SV=1;tr|G4VEH9|G4VEH9_SCHMA Protein YIPF OS=Schistosoma mansoni GN=Smp_013300.1 PE=3 SV=1	1	22.532	-0.148621	16.8797	16.3799	17.8222	17.0272	17.2665	17.398	16.8631	17.1759
G4VEI1	tr|G4VEI1|G4VEI1_SCHMA Acetyl-CoA C-acetyltransferase OS=Schistosoma mansoni GN=Smp_208080 PE=4 SV=1	1	16.429	-1.21071	17.5798	17.4398	17.09	17.3699	18.7359	18.7472	18.2585	18.5806
G4VEI2	tr|G4VEI2|G4VEI2_SCHMA Acetyl-CoA C-acetyltransferase (Fragment) OS=Schistosoma mansoni GN=Smp_197330 PE=4 SV=1	12	103.1	0.124409	18.8781	18.9632	19.1138	18.9851	19.0945	18.3841	19.1033	18.8606
G4VEI7	tr|G4VEI7|G4VEI7_SCHMA Putative suppressor of potassium transport defect 3 (Skd3 protein) OS=Schistosoma mansoni GN=Smp_145990 PE=4 SV=1	12	56.993	-0.275533	18.8515	19.1474	19.9058	19.3015	19.514	19.6601	19.5571	19.5771
G4VEK2	tr|G4VEK2|G4VEK2_SCHMA Putative homeobox protein OS=Schistosoma mansoni GN=Smp_164610 PE=3 SV=1	1	59.476	0.180714	17.2138	17.324	17.1289	17.2222	17.206	17.4256	16.4929	17.0415
G4VEK3	tr|G4VEK3|G4VEK3_SCHMA Putative dnaj homolog subfamily B member OS=Schistosoma mansoni GN=Smp_078800 PE=4 SV=1	3	22.266	-1.66156	18.1631	19.2282	18.5209	18.6374	20.2457	20.6846	19.9667	20.299
G4VEK4	tr|G4VEK4|G4VEK4_SCHMA Dihydropyrimidinase related protein-1 (M38 family) OS=Schistosoma mansoni GN=Smp_078780 PE=4 SV=1	16	64.716	-0.748152	20.7996	20.8503	20.9075	20.8525	21.6493	21.52	21.6326	21.6006
G4VEK7	tr|G4VEK7|G4VEK7_SCHMA Uncharacterized protein OS=Schistosoma mansoni GN=Smp_129520 PE=4 SV=1	19	123.89	-1.9882	17.9603	17.19	17.4319	17.5274	19.4872	19.7355	19.3241	19.5156
G4VEL1	tr|G4VEL1|G4VEL1_SCHMA Putative cell division cycle OS=Schistosoma mansoni GN=Smp_070690 PE=4 SV=1	5	50.309	-0.918343	13.8721	16.2101	16.4413	15.5078	16.9408	16.9382	15.3995	16.4262
G4VEL6	tr|G4VEL6|G4VEL6_SCHMA Farnesyl pyrophosphate synthase OS=Schistosoma mansoni GN=Smp_070710 PE=3 SV=1	10	44.864	-0.151707	19.6514	19.5805	19.531	19.5876	19.709	19.8686	19.6405	19.7394
G4VEM0	tr|G4VEM0|G4VEM0_SCHMA Uncharacterized protein OS=Schistosoma mansoni GN=Smp_070770 PE=4 SV=1	1	14.489	0.571503	17.0092	17.4435	16.7567	17.0698	16.4983			16.4983
G4VEM1	tr|G4VEM1|G4VEM1_SCHMA UDP-glucose 4-epimerase OS=Schistosoma mansoni GN=Smp_070780 PE=3 SV=1	9	39.02	-1.53618	19.3816	20.6006	20.4366	20.1396	21.9711	21.3498	21.7065	21.6758
G4VEM7	tr|G4VEM7|G4VEM7_SCHMA Carbamoyl-phosphate synthetase (Glutamine-hydrolysing) OS=Schistosoma mansoni GN=Smp_186670 PE=3 SV=1	50	249.51	0.140889	18.2227	18.8154	19.8123	18.9501	18.6321	18.7964	18.9992	18.8092
G4VEN0;G4VEM9	tr|G4VEN0|G4VEN0_SCHMA Putative heat shock protein 70 (Hsp70) OS=Schistosoma mansoni GN=Smp_106130.2 PE=3 SV=1;tr|G4VEM9|G4VEM9_SCHMA Putative heat shock protein 70 (Hsp70) OS=Schistosoma mansoni GN=Smp_106130.1 PE=3 SV=1	40	71.382	0.703828	25.4594	25.2803	25.5475	25.4291	24.7996	24.8548	24.5214	24.7252
G4VEN3	tr|G4VEN3|G4VEN3_SCHMA Uncharacterized protein OS=Schistosoma mansoni GN=Smp_181460 PE=4 SV=1	6	50.808	-0.413011	17.4462	17.8437	16.6492	17.313	17.0639	18.1008	18.0135	17.726
G4VEP7	tr|G4VEP7|G4VEP7_SCHMA Putative 26s proteasome non-ATPase regulatory subunit OS=Schistosoma mansoni GN=Smp_181380 PE=4 SV=1	8	69.962	0.171396	19.1999	18.9682	18.7922	18.9868	19.1509	18.9445	18.3508	18.8154
G4VEP8;G4VEP9	tr|G4VEP8|G4VEP8_SCHMA Uncharacterized protein OS=Schistosoma mansoni GN=Smp_105970.1 PE=4 SV=1;tr|G4VEP9|G4VEP9_SCHMA Uncharacterized protein OS=Schistosoma mansoni GN=Smp_105970.2 PE=4 SV=1	15	57.256	1.35405	23.9287	23.5228	23.5927	23.6814	22.2754	22.3488	22.3578	22.3273
G4VEQ0	tr|G4VEQ0|G4VEQ0_SCHMA Zuotin related factor OS=Schistosoma mansoni GN=Smp_105960 PE=4 SV=1	8	61.356	1.09398	18.8042	18.4748	18.2959	18.525	17.5942	17.6704	17.0284	17.431
G4VEQ4	tr|G4VEQ4|G4VEQ4_SCHMA Putative programmed cell death protein 11 (Pre-rRNA processing protein rrp5) OS=Schistosoma mansoni GN=Smp_105930 PE=4 SV=1	30	211.71	1.99067	15.3007	15.3562	17.8972	16.1847	14.4061	13.3228	14.8531	14.194
G4VER1	tr|G4VER1|G4VER1_SCHMA SEL-1 like protein OS=Schistosoma mansoni GN=Smp_210230 PE=4 SV=1	10	42.133	3.16898	18.5214	18.1134	18.826	18.4869	13.1604		17.4755	15.318
G4VER2	tr|G4VER2|G4VER2_SCHMA Uncharacterized protein OS=Schistosoma mansoni GN=Smp_181290 PE=4 SV=1	4	29.049	1.07803	19.1831	19.2416	19.0992	19.1746	18.6658	18.2667	17.3573	18.0966
G4VES0	tr|G4VES0|G4VES0_SCHMA Putative mbp-1 interacting protein-2a OS=Schistosoma mansoni GN=Smp_168330 PE=4 SV=1	3	16.445	0.551643	20.3072	19.771	19.4089	19.829	18.9666	19.4786	19.387	19.2774
G4VES1;G4VES2;G4VES3	tr|G4VES1|G4VES1_SCHMA Dihydropyrimidinase related protein-2 (M38 family) OS=Schistosoma mansoni GN=Smp_085110.2 PE=4 SV=1;tr|G4VES2|G4VES2_SCHMA Dihydropyrimidinase (M38 family) OS=Schistosoma mansoni GN=Smp_085110.3 PE=4 SV=1;tr|G4VES3|G4VES3_SCHMA Dihyd	31	63.859	0.117732	23.6367	23.6613	23.5191	23.6057	23.4777	23.6968	23.2894	23.488
G4VES6	tr|G4VES6|G4VES6_SCHMA Putative chaperone binding protein OS=Schistosoma mansoni GN=Smp_010160 PE=4 SV=1	16	23.03	-0.445298	23.0555	22.8602	22.6651	22.8603	23.4528	23.1024	23.3614	23.3055
G4VET6	tr|G4VET6|G4VET6_SCHMA Snf7-related OS=Schistosoma mansoni GN=Smp_010090 PE=3 SV=1	2	19.528	0.255874	19.1894	19.4636	19.1799	19.2777	18.7503	19.1574	19.1577	19.0218
G4VET8	tr|G4VET8|G4VET8_SCHMA Putative suppression of tumorigenicity OS=Schistosoma mansoni GN=Smp_210680 PE=4 SV=1	2	38.298	1.27046	16.2694	17.057	16.4772	16.6012	14.6142	16.8063	14.5718	15.3307
G4VEW1;G4V957	tr|G4VEW1|G4VEW1_SCHMA One cut domain family member OS=Schistosoma mansoni GN=Smp_013070 PE=3 SV=1;tr|G4V957|G4V957_SCHMA One cut domain family member OS=Schistosoma mansoni GN=Smp_196950 PE=3 SV=1	2	81.93	M only				N/A	15.6334	16.3016	16.4942	16.1431
G4VEW9	tr|G4VEW9|G4VEW9_SCHMA Putative shoc2 OS=Schistosoma mansoni GN=Smp_129120 PE=4 SV=1	3	60.12	1.09907	17.5069	16.9541	19.7377	18.0662	17.3242	16.3878	17.1893	16.9671
G4VEX2	tr|G4VEX2|G4VEX2_SCHMA Eukaryotic translation initiation factor 3 subunit J OS=Schistosoma mansoni GN=Smp_012980 PE=3 SV=1	11	25.709	0.650682	23.0979	22.9344	22.5325	22.8549	22.2196	22.4665	21.9267	22.2043
G4VEY1	tr|G4VEY1|G4VEY1_SCHMA Uncharacterized protein OS=Schistosoma mansoni GN=Smp_026340 PE=4 SV=1	2	9.9282	1.34296	19.3387	19.7307	18.3694	19.1463	17.8033			17.8033
G4VEY4	tr|G4VEY4|G4VEY4_SCHMA Putative zinc binding dehydrogenase OS=Schistosoma mansoni GN=Smp_026310 PE=4 SV=1	11	39.407	-0.513315	21.5282	21.3816	21.5093	21.473	21.9729	22.0824	21.9038	21.9863
G4VEZ1;G4VEZ2;G4VEZ3	tr|G4VEZ1|G4VEZ1_SCHMA Peptide alpha-n-acetyltransferase-related OS=Schistosoma mansoni GN=Smp_026250.3 PE=4 SV=1;tr|G4VEZ2|G4VEZ2_SCHMA Peptide alpha-n-acetyltransferase-related OS=Schistosoma mansoni GN=Smp_026250.2 PE=4 SV=1;tr|G4VEZ3|G4VEZ3_SCHMA Pepti	12	124.28	1.11839	16.3929	17.9265	18.084	17.4678	15.5717	15.7841	17.6924	16.3494
G4VEZ7	tr|G4VEZ7|G4VEZ7_SCHMA Lip-related protein (Liprin) alpha OS=Schistosoma mansoni GN=Smp_136330 PE=4 SV=1	2	153.75	-0.808224	14.7818	11.1577	14.9248	13.6214	13.0831	13.3247	16.8812	14.4297
G4VEZ9	tr|G4VEZ9|G4VEZ9_SCHMA Uncharacterized protein OS=Schistosoma mansoni GN=Smp_092810.1 PE=4 SV=1	4	31.277	-0.595629	18.7712	18.8832	19.5263	19.0602	19.3199	19.6939	19.9537	19.6558
G4VF05	tr|G4VF05|G4VF05_SCHMA Putative origin recognition complex subunit OS=Schistosoma mansoni GN=Smp_052390 PE=4 SV=1	5	53.959	-0.105018	15.8034	16.4058	16.9642	16.3912	16.3304	16.518	16.6402	16.4962
G4VF06;G4VF07	tr|G4VF06|G4VF06_SCHMA Putative receptor protein tyrosine phosphatase n,(Ia2) OS=Schistosoma mansoni GN=Smp_150220.1 PE=4 SV=1;tr|G4VF07|G4VF07_SCHMA Putative receptor protein tyrosine phosphatase n,(Ia2) OS=Schistosoma mansoni GN=Smp_150220.2 PE=4 SV=1	3	82.016	1.44103	13.0581	15.9917	17.0647	15.3715	13.5712	15.0155	13.2047	13.9305
G4VF15	tr|G4VF15|G4VF15_SCHMA Cleavage and polyadenylation specificity factor-related OS=Schistosoma mansoni GN=Smp_084380 PE=4 SV=1	6	75.263	0.254043	17.1471	16.7665	17.6222	17.1786	17.3367	16.7944	16.6426	16.9246
G4VF17;G4VF19;G4VF18	tr|G4VF17|G4VF17_SCHMA Sporulation protein rmd5-related (Glucose-induced degradation protein 2) OS=Schistosoma mansoni GN=Smp_084400.4 PE=4 SV=1;tr|G4VF19|G4VF19_SCHMA Sporulation protein rmd5-related (Glucose-induced degradation protein 2) OS=Schistosoma	2	52.985	-0.378504	16.374	16.3035	16.1848	16.2874	16.6888		16.6431	16.6659
G4VF21	tr|G4VF21|G4VF21_SCHMA Trans-golgi protein gmx33-related OS=Schistosoma mansoni GN=Smp_007500.1 PE=4 SV=1	4	32.081	1.80296	20.1156	19.8241	18.236	19.3919	17.0531	17.9774	17.7364	17.589
G4VF23;G4VF24;G4VF25	tr|G4VF23|G4VF23_SCHMA Ubiquitin carboxyl-terminal hydrolase OS=Schistosoma mansoni GN=Smp_168800.4 PE=3 SV=1;tr|G4VF24|G4VF24_SCHMA Ubiquitin carboxyl-terminal hydrolase OS=Schistosoma mansoni GN=Smp_168800.1 PE=3 SV=1;tr|G4VF25|G4VF25_SCHMA Ubiquitin car	3	17.8	0.279737	21.8437	21.5387	21.3754	21.586	21.4391	21.3857	21.0938	21.3062
G4VF29	tr|G4VF29|G4VF29_SCHMA Uncharacterized protein OS=Schistosoma mansoni GN=Smp_085780 PE=4 SV=1	3	30.108	0.635261	18.2312	17.6764	18.5343	18.1473			17.512	17.512
G4VF32	tr|G4VF32|G4VF32_SCHMA Putative mitochondria associated granulocyte macrophage csf signaling molecule OS=Schistosoma mansoni GN=Smp_168770 PE=4 SV=1	3	15.105	1.0847	19.7045	19.3224	18.7268	19.2512	18.0428	18.3311	18.1255	18.1665
G4VF34	tr|G4VF34|G4VF34_SCHMA Abl-binding protein-related OS=Schistosoma mansoni GN=Smp_085740 PE=4 SV=1	1	61.306	-0.719207	15.7606	16.563	16.0467	16.1234	17.3885	15.5153	17.624	16.8426
G4VF38	tr|G4VF38|G4VF38_SCHMA Uncharacterized protein OS=Schistosoma mansoni GN=Smp_168760 PE=4 SV=1	5	48.845	0.364994	18.6109	19.5041	19.6158	19.2436	18.7176	18.379	19.5393	18.8786
G4VF49	tr|G4VF49|G4VF49_SCHMA Lysosomal Pro-Xaa carboxypeptidase (S28 family) OS=Schistosoma mansoni GN=Smp_002600.1 PE=4 SV=1	3	56.326	-0.473052	20.5602	20.5706	20.6323	20.5877	21.1453	21.359	20.678	21.0608
G4VF50	tr|G4VF50|G4VF50_SCHMA Rna methyltransferase-related OS=Schistosoma mansoni GN=Smp_123530 PE=4 SV=1	7	44.869	0.741922	16.8839	17.9516	17.7651	17.5335	16.8397		16.7435	16.7916
G4VF51	tr|G4VF51|G4VF51_SCHMA Putative rna m5u methyltransferase OS=Schistosoma mansoni GN=Smp_123520 PE=3 SV=1	8	68.725	0.45255	15.0894	17.4071	17.7938	16.7634	16.5945	17.4547	14.8834	16.3109
G4VF52	tr|G4VF52|G4VF52_SCHMA Putative vacuolar protein sorting vps16 OS=Schistosoma mansoni GN=Smp_123510 PE=4 SV=1	4	105.34	-2.13095	14.6541	13.8856		14.2698	15.6179	16.8572	16.7272	16.4008
G4VF54;G4VF55	tr|G4VF54|G4VF54_SCHMA RNA-binding protein 8A OS=Schistosoma mansoni GN=Smp_002550.1 PE=3 SV=1;tr|G4VF55|G4VF55_SCHMA RNA-binding protein 8A OS=Schistosoma mansoni GN=Smp_002550.2 PE=3 SV=1	11	20.158	0.763919	23.2156	23.1258	22.8063	23.0493	22.3791	22.4539	22.023	22.2853
G4VF56	tr|G4VF56|G4VF56_SCHMA Putative nicotinamide mononucleotide adenylyltransferase OS=Schistosoma mansoni GN=Smp_123490 PE=4 SV=1	7	32.845	-0.831024	18.5947	18.7354	17.8839	18.4047	19.0263	19.6568	19.024	19.2357
G4VF59	tr|G4VF59|G4VF59_SCHMA Pyruvate dehydrogenase (Lipoamide) OS=Schistosoma mansoni GN=Smp_002510 PE=4 SV=1	10	38.71	-0.622635	22.1327	22.1146	22.1738	22.1404	22.8187	23.0208	22.4494	22.763
G4VF62	tr|G4VF62|G4VF62_SCHMA Uncharacterized protein OS=Schistosoma mansoni GN=Smp_123450 PE=4 SV=1	6	96.659	-0.772179	15.1448	15.2685	16.5517	15.655	16.014	15.7057	17.5618	16.4272
G4VF64	tr|G4VF64|G4VF64_SCHMA Putative fad oxidoreductase OS=Schistosoma mansoni GN=Smp_123440.1 PE=4 SV=1	5	44.181	-0.967533	16.7003	17.9127	17.5173	17.3768	18.4865	18.9113	17.635	18.3443
G4VF69	tr|G4VF69|G4VF69_SCHMA Putative hsl and clp protease OS=Schistosoma mansoni GN=Smp_063490 PE=4 SV=1	2	37.318	1.11966	16.7351	17.359	17.8281	17.3074	16.1877			16.1877
G4VF70	tr|G4VF70|G4VF70_SCHMA Putative atp-dependent clp protease ATP-binding subunit clpx OS=Schistosoma mansoni GN=Smp_063480 PE=4 SV=1	2	35.367	-0.119558	16.6802	16.5381	16.5322	16.5835	16.8072	16.8795	16.4223	16.703
G4VF74	tr|G4VF74|G4VF74_SCHMA Pyruvate kinase OS=Schistosoma mansoni GN=Smp_156360 PE=3 SV=1	17	127.12	-1.37668	19.3421	19.345	19.8832	19.5234	20.9777	21.2705	20.4521	20.9001
G4VF75	tr|G4VF75|G4VF75_SCHMA Putative chaperonin containing t-complex protein 1,epsilon subunit, tcpe OS=Schistosoma mansoni GN=Smp_063420 PE=3 SV=1	24	60.244	0.361062	24.6374	24.7163	24.5227	24.6255	24.5799	24.1938	24.0196	24.2644
G4VF81	tr|G4VF81|G4VF81_SCHMA Putative 60s ribosomal protein L27e OS=Schistosoma mansoni GN=Smp_063350 PE=4 SV=1	7	16.697	0.786789	23.3588	23.1773	23.1769	23.2377	22.9227	21.8027	22.6274	22.4509
G4VF91	tr|G4VF91|G4VF91_SCHMA Putative basic fgf-repressed zic binding protein homolog (Zic3-binding protein) OS=Schistosoma mansoni GN=Smp_063250.1 PE=4 SV=1	3	29.309	1.11215	16.634	18.7445	19.0673	18.1486	17.5591	15.0203	18.53	17.0365
G4VF95	tr|G4VF95|G4VF95_SCHMA Putative leucine-rich repeat-containing protein OS=Schistosoma mansoni GN=Smp_063230 PE=4 SV=1	13	64.704	0.795687	20.975	21.2047	21.2153	21.1316	20.7073	19.8285	20.4721	20.3359
G4VFA1	tr|G4VFA1|G4VFA1_SCHMA Uncharacterized protein OS=Schistosoma mansoni GN=Smp_169830 PE=4 SV=1	1	29.268	M only				N/A	17.7618	17.3692	17.6181	17.583
G4VFA5	tr|G4VFA5|G4VFA5_SCHMA Putative programmed cell death 6-interacting protein OS=Schistosoma mansoni GN=Smp_087620 PE=4 SV=1	24	93.194	0.380275	19.6854	19.6699	19.4619	19.6058	18.9882	19.2737	19.4145	19.2255
G4VFA7	tr|G4VFA7|G4VFA7_SCHMA DNA topoisomerase OS=Schistosoma mansoni GN=Smp_169790 PE=3 SV=1	6	132.02	-0.834203	14.5334	16.5026	16.7008	15.9123	16.8552	16.4444	16.9399	16.7465
G4VFA8	tr|G4VFA8|G4VFA8_SCHMA Pcd6 interacting protein-related OS=Schistosoma mansoni GN=Smp_087580 PE=4 SV=1	2	81.298	-0.234775	15.942	17.2565	15.6276	16.2753	16.7469	16.3524	16.431	16.5101
G4VFB1	tr|G4VFB1|G4VFB1_SCHMA Uncharacterized protein OS=Schistosoma mansoni GN=Smp_087550 PE=4 SV=1	2	12.712	0.680728	20.8172	20.3324	20.3278	20.4925	20.0657	19.3207	20.0489	19.8117
G4VFB4	tr|G4VFB4|G4VFB4_SCHMA Uncharacterized protein OS=Schistosoma mansoni GN=Smp_079710 PE=4 SV=1	2	10.085	1.55507	21.8126	21.4415	21.7985	21.6842	21.4662	21.3588	17.5624	20.1291
G4VFB6	tr|G4VFB6|G4VFB6_SCHMA Putative rna recognition motif containing protein OS=Schistosoma mansoni GN=Smp_079730 PE=4 SV=1	4	44.339	1.00577	19.3168	19.2791	19.2004	19.2654	18.7921	19.0022	16.9847	18.2597
G4VFB7	tr|G4VFB7|G4VFB7_SCHMA Putative cullin-2 (Cul-2) OS=Schistosoma mansoni GN=Smp_079740 PE=3 SV=1	5	90.304	0.0599088	15.0899	15.7256	16.0447	15.62	15.537		15.5833	15.5601
G4VFB9;G4VFC0	tr|G4VFB9|G4VFB9_SCHMA Protein kinase OS=Schistosoma mansoni GN=Smp_079760.1 PE=4 SV=1;tr|G4VFC0|G4VFC0_SCHMA Protein kinase OS=Schistosoma mansoni GN=Smp_079760.2 PE=4 SV=1	10	56.051	-0.817494	17.7521	18.7692	18.1056	18.209	19.0991	18.8617	19.1186	19.0265
G4VFC2;P38658;G4VFC1	tr|G4VFC2|G4VFC2_SCHMA Protein disulfide-isomerase OS=Schistosoma mansoni GN=Smp_079770.1 PE=3 SV=1;sp|P38658|ERP60_SCHMA Probable protein disulfide-isomerase ER-60 OS=Schistosoma mansoni PE=3 SV=1;tr|G4VFC1|G4VFC1_SCHMA Uncharacterized protein OS=Schistos	28	54.359	-0.105562	24.8831	24.699	24.857	24.813	24.798	24.9924	24.9654	24.9186
G4VFC7	tr|G4VFC7|G4VFC7_SCHMA Uroporphyrinogen-III synthase OS=Schistosoma mansoni GN=Smp_079840 PE=4 SV=1	6	27.361	-1.04783	17.586	19.1863	16.9001	17.8908	19.2138	18.9923	18.6098	18.9386
G4VFD2	tr|G4VFD2|G4VFD2_SCHMA Putative ubiquitin ligase E3a OS=Schistosoma mansoni GN=Smp_168160 PE=4 SV=1	4	119.52	0.406468	16.8561	16.169	15.7574	16.2608	15.4778	15.384	16.7013	15.8544
G4VFE0	tr|G4VFE0|G4VFE0_SCHMA Putative collagen alpha-1(V) chain OS=Schistosoma mansoni GN=Smp_164590 PE=4 SV=1	3	151.98	-1.26684	16.6755	18.3558	18.4402	17.8238	19.6325	18.8567	18.7828	19.0907
G4VFE1	tr|G4VFE1|G4VFE1_SCHMA Uncharacterized protein OS=Schistosoma mansoni GN=Smp_197370 PE=4 SV=1	2	125.74	-1.21763	15.4731	17.1655	15.6859	16.1082	18.4386	15.3024	18.2364	17.3258
G4VFE2	tr|G4VFE2|G4VFE2_SCHMA Groucho-related OS=Schistosoma mansoni GN=Smp_165280 PE=4 SV=1	7	94.905	-0.651224	15.764	17.03	17.794	16.8627	17.4408	17.5694	17.5314	17.5139
G4VFE8;G4VCW3;G4VCW1;G4V9N3	tr|G4VFE8|G4VFE8_SCHMA Histone H2A OS=Schistosoma mansoni GN=Smp_002930 PE=3 SV=1;tr|G4VCW3|G4VCW3_SCHMA Histone H2A OS=Schistosoma mansoni GN=Smp_089870 PE=3 SV=1;tr|G4VCW1|G4VCW1_SCHMA Histone H2A OS=Schistosoma mansoni GN=Smp_089840 PE=3 SV=1;tr|G4V9N3|	2	13.441	-0.429093	22.1895	21.9995	22.5308	22.24	23.3975	22.6338	21.9759	22.6691
G4VFF1;G4VFF2	tr|G4VFF1|G4VFF1_SCHMA Putative gtp-binding protein rit OS=Schistosoma mansoni GN=Smp_084940.1 PE=4 SV=1;tr|G4VFF2|G4VFF2_SCHMA Putative gtp-binding protein rit OS=Schistosoma mansoni GN=Smp_084940.3 PE=4 SV=1	3	18.09	-1.0937	19.6616	18.4904	19.0097	19.0539	20.3939	20.1366	19.9123	20.1476
G4VFF7	tr|G4VFF7|G4VFF7_SCHMA Putative translation initiation factor EIF-2b alpha subunit OS=Schistosoma mansoni GN=Smp_084900 PE=3 SV=1	4	37.007	-0.414793	17.9323	17.7902		17.8612	18.3587	18.3568	18.1125	18.276
G4VFG0	tr|G4VFG0|G4VFG0_SCHMA Uncharacterized protein OS=Schistosoma mansoni GN=Smp_084860 PE=4 SV=1	4	37.772	0.99557	18.3126	18.4257	18.6708	18.4697	18.0042	18.1407	16.2775	17.4741
G4VFG2	tr|G4VFG2|G4VFG2_SCHMA Uncharacterized protein OS=Schistosoma mansoni GN=Smp_168170 PE=4 SV=1	6	37.683	0.496921	20.0461	20.1201	19.5548	19.907	19.5786	19.7986	18.8529	19.4101
G4VFG7	tr|G4VFG7|G4VFG7_SCHMA Uncharacterized protein OS=Schistosoma mansoni GN=Smp_138220 PE=4 SV=1	9	94.089	-1.20631	16.4366	17.2407	17.2134	16.9636	18.3699	17.6182	18.5216	18.1699
G4VFH3	tr|G4VFH3|G4VFH3_SCHMA Uncharacterized protein OS=Schistosoma mansoni GN=Smp_029730 PE=4 SV=1	5	156.13	2.26035	16.0443	15.8381	16.1709	16.0178			13.7574	13.7574
G4VFH7	tr|G4VFH7|G4VFH7_SCHMA Uncharacterized protein OS=Schistosoma mansoni GN=Smp_029750 PE=4 SV=1	4	16.251	3.05019	21.0425	21.0803	20.4845	20.8691	17.9388	17.3595	18.1584	17.8189
G4VFH8	tr|G4VFH8|G4VFH8_SCHMA Uncharacterized protein OS=Schistosoma mansoni GN=Smp_138280 PE=4 SV=1	6	39.975	0.824943	20.0282	20.0701	20.1394	20.0793	19.331	18.9364	19.4956	19.2543
G4VFI0	tr|G4VFI0|G4VFI0_SCHMA Uncharacterized protein OS=Schistosoma mansoni GN=Smp_029780 PE=4 SV=1	3	31.785	M only				N/A	18.8421	19.3152	15.9804	18.0459
G4VFI1	tr|G4VFI1|G4VFI1_SCHMA Uncharacterized protein OS=Schistosoma mansoni GN=Smp_029790 PE=4 SV=1	3	12.225	-5.25887		15.9453		15.9453	21.2502	21.5113	20.8512	21.2042
G4VFI3	tr|G4VFI3|G4VFI3_SCHMA Putative tetraspanin OS=Schistosoma mansoni GN=Smp_138300 PE=4 SV=1	1	35.233	M only				N/A	15.6351	16.6031	15.725	15.9877
G4VFI4	tr|G4VFI4|G4VFI4_SCHMA Putative 60s acidic ribosomal protein P2 OS=Schistosoma mansoni GN=Smp_029820 PE=3 SV=1	11	12.067	1.5674	25.6707	25.3874	24.8933	25.3171	23.8399	23.8197	23.5896	23.7497
G4VFI8	tr|G4VFI8|G4VFI8_SCHMA Putative septin OS=Schistosoma mansoni GN=Smp_029890 PE=1 SV=1	7	48.077	-0.0511184	19.405	19.031	18.8611	19.0991	18.6288	19.279	19.5426	19.1502
G4VFI9;G4VFJ0	tr|G4VFI9|G4VFI9_SCHMA Peptidyl-prolyl cis-trans isomerase OS=Schistosoma mansoni GN=Smp_029900.1 PE=3 SV=1;tr|G4VFJ0|G4VFJ0_SCHMA Peptidyl-prolyl cis-trans isomerase OS=Schistosoma mansoni GN=Smp_029900.2 PE=3 SV=1	4	17.999	1.55028	20.6074	20.6899	19.1425	20.1466	18.6279	17.8892	19.2718	18.5963
G4VFK1;P91803;D6BNU4	tr|G4VFK1|G4VFK1_SCHMA Leucine aminopeptidase (M17 family) OS=Schistosoma mansoni GN=Smp_030000 PE=4 SV=1;tr|P91803|P91803_SCHMA Putative cytosol aminopeptidase (Fragment) OS=Schistosoma mansoni PE=2 SV=1;tr|D6BNU4|D6BNU4_SCHMA Leucine aminopeptidase 1 OS=	23	55.676	-0.437672	21.9984	22.4016	21.8278	22.076	22.6182	22.3623	22.5604	22.5136
G4VFL2	tr|G4VFL2|G4VFL2_SCHMA Uncharacterized protein OS=Schistosoma mansoni GN=Smp_138400 PE=4 SV=1	1	337.98	-0.420805	17.0728	16.8036	16.3006	16.7257	17.0646	17.3408	17.034	17.1465
G4VFM0;G4VFL9;G4VFL8	tr|G4VFM0|G4VFM0_SCHMA Ribonuclease pH related OS=Schistosoma mansoni GN=Smp_120960.3 PE=4 SV=1;tr|G4VFL9|G4VFL9_SCHMA Ribonuclease pH related OS=Schistosoma mansoni GN=Smp_120960.2 PE=4 SV=1;tr|G4VFL8|G4VFL8_SCHMA Ribonuclease pH related OS=Schistosoma ma	2	17.117	1.06062	19.1371	18.3865	18.2117	18.5784	16.7912	18.2279	17.5344	17.5178
G4VFM6	tr|G4VFM6|G4VFM6_SCHMA Ubiquitin-related modifier 1 homolog OS=Schistosoma mansoni GN=Smp_030180 PE=3 SV=1	3	10.858	1.85841	20.4211	20.2603	19.8084	20.1633	18.4795	18.4773	17.9578	18.3049
G4VFM9	tr|G4VFM9|G4VFM9_SCHMA Putative phosphoglycolate/pyridoxal phosphate phosphatase OS=Schistosoma mansoni GN=Smp_030220 PE=3 SV=1	6	31.914	-0.605883	20.9841	21.0243	20.8882	20.9655	21.7423	21.6704	21.3016	21.5714
G4VFN3	tr|G4VFN3|G4VFN3_SCHMA Uncharacterized protein OS=Schistosoma mansoni GN=Smp_138520 PE=4 SV=1	3	36.304	0.150825		18.3317	18.2974	18.3145	16.796	19.0413	18.6537	18.1637
G4VFN4	tr|G4VFN4|G4VFN4_SCHMA C64 protease (C64 family) OS=Schistosoma mansoni GN=Smp_030280.1 PE=4 SV=1	2	26.807	1.43091	20.0858	20.0473	19.6549	19.9293	19.1073	18.3472	18.0407	18.4984
G4VFN5	tr|G4VFN5|G4VFN5_SCHMA Putative prefoldin subunit 2 OS=Schistosoma mansoni GN=Smp_030290 PE=4 SV=1	7	16.261	0.748405	21.989	22.2914	21.1385	21.8063	21.1881	20.9493	21.0362	21.0579
G4VFN7;G4VFN9;Q9NHY5	tr|G4VFN7|G4VFN7_SCHMA Putative endoplasmin OS=Schistosoma mansoni GN=Smp_030300.4 PE=3 SV=1;tr|G4VFN9|G4VFN9_SCHMA Putative endoplasmin OS=Schistosoma mansoni GN=Smp_030300.3 PE=3 SV=1;tr|Q9NHY5|Q9NHY5_SCHMA Endoplasmin OS=Schistosoma mansoni PE=2 SV=1	41	239.52	-0.264496	22.735	22.5248	22.5713	22.6104	22.7272	23.0443	22.8531	22.8749
G4VFP3;G4VFP2	tr|G4VFP3|G4VFP3_SCHMA Putative peptidyl-tRNA hydrolase OS=Schistosoma mansoni GN=Smp_030330.1 PE=4 SV=1;tr|G4VFP2|G4VFP2_SCHMA Putative peptidyl-tRNA hydrolase OS=Schistosoma mansoni GN=Smp_030330.2 PE=4 SV=1	6	17.092	-1.0759	19.7291	20.4942	20.9138	20.379	21.4003	21.4414	21.5229	21.4549
G4VFP9	tr|G4VFP9|G4VFP9_SCHMA Putative glycyl-tRNA synthetase OS=Schistosoma mansoni GN=Smp_040800 PE=4 SV=1	29	148.86	0.576947	21.1009	21.0502	20.8232	20.9914	20.3347	20.5884	20.3204	20.4145
G4VFQ0;Q26551	tr|G4VFQ0|G4VFQ0_SCHMA Peptidyl-prolyl cis-trans isomerase OS=Schistosoma mansoni GN=Smp_040790 PE=3 SV=1;sp|Q26551|PPIB_SCHMA Peptidyl-prolyl cis-trans isomerase B OS=Schistosoma mansoni GN=CYP PE=2 SV=1	12	23.296	0.302238	23.91	23.6711	23.6968	23.7593	23.5925	23.5003	23.2784	23.4571
G4VFQ2	tr|G4VFQ2|G4VFQ2_SCHMA Putative methionine-tRNA synthetase OS=Schistosoma mansoni GN=Smp_040770 PE=3 SV=1	16	67.687	0.21245	20.2176	20.7366	20.7117	20.5553	20.3136	20.0743	20.6406	20.3428
G4VFS0	tr|G4VFS0|G4VFS0_SCHMA Putative rootletin (Ciliary rootlet coiled-coil protein) OS=Schistosoma mansoni GN=Smp_134850 PE=4 SV=1	20	110.84	-0.726876	19.3721	19.1287	19.2845	19.2618	19.6745	20.2964	19.995	19.9886
G4VFS1	tr|G4VFS1|G4VFS1_SCHMA Putative structural maintenance of chromosomes smc3 OS=Schistosoma mansoni GN=Smp_145260 PE=4 SV=1	8	34.012	-0.121332	19.3787	18.8086	19.0272	19.0715	19.1182	18.9868	19.4735	19.1928
G4VFS2	tr|G4VFS2|G4VFS2_SCHMA Translational activator gcn1-related OS=Schistosoma mansoni GN=Smp_134860 PE=4 SV=1	54	352.26	1.10957	15.1778	16.1002	17.2137	16.1639	14.8991	12.3476	17.9163	15.0543
G4VFS5	tr|G4VFS5|G4VFS5_SCHMA Putative nucleosome assembly protein OS=Schistosoma mansoni GN=Smp_023530 PE=3 SV=1	16	44.667	1.02917	24.5624	24.3355	24.5497	24.4825	23.4229	23.4393	23.4978	23.4534
G4VFT5	tr|G4VFT5|G4VFT5_SCHMA Uncharacterized protein OS=Schistosoma mansoni GN=Smp_134940 PE=4 SV=1	3	80.113	-0.319779	17.421	17.1572	17.5109	17.363	17.7646	17.7172	17.5667	17.6828
G4VFT6	tr|G4VFT6|G4VFT6_SCHMA Putative u3 small nucleolar ribonucleoprotein protein MPP10 OS=Schistosoma mansoni GN=Smp_023660 PE=4 SV=1	8	30.39	1.9477	20.1027	19.8583	19.9987	19.9866	18.2945	17.9442	17.8779	18.0389
G4VFT7	tr|G4VFT7|G4VFT7_SCHMA Putative tar rna binding protein (Trbp) OS=Schistosoma mansoni GN=Smp_023670 PE=4 SV=1	3	39.921	0.725287	18.5727	18.4067	17.3304	18.1033	17.4925	17.5003	17.1411	17.378
G4VFT9;G4VFU0	tr|G4VFT9|G4VFT9_SCHMA Uncharacterized protein OS=Schistosoma mansoni GN=Smp_023700.1 PE=4 SV=1;tr|G4VFU0|G4VFU0_SCHMA Uncharacterized protein OS=Schistosoma mansoni GN=Smp_023700.2 PE=4 SV=1	1	14.58	0.637972	19.1344	18.9202	18.5845	18.8797	17.9573	18.8644	17.9034	18.2417
G4VFV4	tr|G4VFV4|G4VFV4_SCHMA Putative rap1 and OS=Schistosoma mansoni GN=Smp_071250 PE=4 SV=1	9	20.699	-1.07244	21.4652	21.5158	21.4806	21.4872	22.6319	22.4804	22.5666	22.5596
G4VFV5	tr|G4VFV5|G4VFV5_SCHMA Phospholipase d-related OS=Schistosoma mansoni GN=Smp_160830 PE=4 SV=1	4	53.322	1.68745	17.815	17.6368	17.8241	17.7586	16.1765		15.9659	16.0712
G4VFV7	tr|G4VFV7|G4VFV7_SCHMA Putative tpr OS=Schistosoma mansoni GN=Smp_160850 PE=4 SV=1	38	270.7	0.381315	18.8	18.6092	19.0688	18.826	18.3357	18.7031	18.2952	18.4447
G4VFW1	tr|G4VFW1|G4VFW1_SCHMA Putative aaa family ATPase OS=Schistosoma mansoni GN=Smp_160870 PE=3 SV=1	11	76.596	2.1246	18.4643	18.4861	17.9443	18.2982	16.2956	15.7766	16.4487	16.1736
G4VFX0;Q15ER8	tr|G4VFX0|G4VFX0_SCHMA Putative tropinone reductase OS=Schistosoma mansoni GN=Smp_042680 PE=4 SV=1;tr|Q15ER8|Q15ER8_SCHMA U2 snRNP splicing factor small subunit-like protein OS=Schistosoma mansoni PE=2 SV=1	13	29.407	-0.298449	21.4684	21.6758	22.2398	21.7947	22.4114	21.8283	22.0397	22.0931
G4VFX1;G4VFX2	tr|G4VFX1|G4VFX1_SCHMA Uncharacterized protein OS=Schistosoma mansoni GN=Smp_042670.2 PE=3 SV=1;tr|G4VFX2|G4VFX2_SCHMA Uncharacterized protein OS=Schistosoma mansoni GN=Smp_042670.1 PE=3 SV=1	18	125.66	0.0579635	17.6631	18.0155	18.9733	18.2173	18.527	17.1377	18.8134	18.1594
G4VFX6;G4VFX7	tr|G4VFX6|G4VFX6_SCHMA Putative histidyl-tRNA synthetase OS=Schistosoma mansoni GN=Smp_023360.2 PE=4 SV=1;tr|G4VFX7|G4VFX7_SCHMA Putative histidyl-tRNA synthetase OS=Schistosoma mansoni GN=Smp_023360.1 PE=4 SV=1	24	59.929	1.06825	21.5398	21.7919	21.7392	21.6903	20.3701	20.787	20.709	20.6221
G4VFY8;G4VFY9	tr|G4VFY8|G4VFY8_SCHMA Lipase maturation factor OS=Schistosoma mansoni GN=Smp_026910.1 PE=3 SV=1;tr|G4VFY9|G4VFY9_SCHMA Lipase maturation factor OS=Schistosoma mansoni GN=Smp_026910.2 PE=3 SV=1	11	73.83	-1.88162	17.9068	18.667	20.1718	18.9152	20.5139	20.5629	21.3137	20.7968
G4VFZ1	tr|G4VFZ1|G4VFZ1_SCHMA Putative alpha-1,3-mannosyl-glycoprotein beta-1,2-n-acetylglucosaminyltransferase OS=Schistosoma mansoni GN=Smp_026930 PE=4 SV=1	2	48.871	3.69711	17.1344	17.3367	17.616	17.3624		13.6653		13.6653
G4VFZ2	tr|G4VFZ2|G4VFZ2_SCHMA Putative torsin A OS=Schistosoma mansoni GN=Smp_136740 PE=4 SV=1	3	34.084	2.73481	18.3961	18.3385	18.4833	18.406		15.6712		15.6712
G4VFZ3	tr|G4VFZ3|G4VFZ3_SCHMA Putative e3 ubiquitin-protein ligase Bre1 (EC 6.3.2.-) (DBre1) OS=Schistosoma mansoni GN=Smp_136750 PE=4 SV=1	6	198.95	1.70282	14.5397	14.7718	14.6371	14.6496		12.9566	12.9368	12.9467
G4VG02	tr|G4VG02|G4VG02_SCHMA Phosphatidylinositol transfer protein OS=Schistosoma mansoni GN=Smp_197450 PE=4 SV=1	7	108.7	-2.02969	12.3952	12.7226	14.5013	13.2064	15.2823	14.7652	15.6606	15.236
G4VG25	tr|G4VG25|G4VG25_SCHMA Putative lupus la ribonucleoprotein OS=Schistosoma mansoni GN=Smp_018950 PE=4 SV=1	12	67.724	1.22435	19.2776	19.2004	19.3368	19.2716	18.3713	17.3343	18.4361	18.0473
G4VG38	tr|G4VG38|G4VG38_SCHMA Putative 60s ribosomal protein L9 OS=Schistosoma mansoni GN=Smp_018990 PE=4 SV=1	10	20.679	0.616789	23.0074	23.2225	23.7085	23.3128	22.408	21.4362	24.2438	22.696
G4VG40	tr|G4VG40|G4VG40_SCHMA Dipeptidyl peptidase 3 OS=Schistosoma mansoni GN=Smp_019010 PE=3 SV=1	33	81.887	-0.710056	23.5479	23.7748	23.8603	23.7277	24.3828	24.5912	24.3392	24.4377
G4VG41	tr|G4VG41|G4VG41_SCHMA Putative choline/ethanolamine kinase OS=Schistosoma mansoni GN=Smp_132570 PE=4 SV=1	2	34.094	1.30103	18.4903	18.3653	18.4194	18.425	15.7842	17.8192	17.7684	17.124
G4VG42;Q26563	tr|G4VG42|G4VG42_SCHMA Putative cathepsin C OS=Schistosoma mansoni GN=Smp_019030 PE=3 SV=1;sp|Q26563|CATC_SCHMA Cathepsin C OS=Schistosoma mansoni PE=2 SV=1	9	51.828	0.316473	19.3706	19.3503	19.8176	19.5128	19.6236	19.2918	18.6737	19.1963
G4VG45;G4VG46	tr|G4VG45|G4VG45_SCHMA Tubulin-specific chaperone A OS=Schistosoma mansoni GN=Smp_019050.1 PE=3 SV=1;tr|G4VG46|G4VG46_SCHMA Tubulin-specific chaperone A OS=Schistosoma mansoni GN=Smp_019050.2 PE=3 SV=1	6	12.649	0.311071	22.1296	22.0493	21.5734	21.9174	21.8449	21.4818	21.4924	21.6064
G4VG47	tr|G4VG47|G4VG47_SCHMA Protein transport protein Sec61 subunit beta OS=Schistosoma mansoni GN=Smp_019060 PE=3 SV=1	1	9.2256	-0.339086	15.953	18.925	18.3116	17.7299	17.901		18.2369	18.0689
G4VG55	tr|G4VG55|G4VG55_SCHMA Coatomer subunit epsilon OS=Schistosoma mansoni GN=Smp_169690 PE=3 SV=1	6	33.274	-0.650895	18.2188	18.9115	19.6482	18.9262	19.937	19.8903	18.9039	19.5771
G4VG83;G4VG82	tr|G4VG83|G4VG83_SCHMA Uncharacterized protein OS=Schistosoma mansoni GN=Smp_100130.1 PE=4 SV=1;tr|G4VG82|G4VG82_SCHMA Uncharacterized protein OS=Schistosoma mansoni GN=Smp_100130.2 PE=4 SV=1	5	38.064	0.878683	19.418	19.1953	19.4583	19.3572	19.3804	17.4541	18.6011	18.4785
G4VG96	tr|G4VG96|G4VG96_SCHMA Cell polarity protein OS=Schistosoma mansoni GN=Smp_130280 PE=4 SV=1	6	279.49	-3.10461	15.5315	14.0754	15.4316	15.0128	19.0456	19.1352	16.1716	18.1174
G4VGA3	tr|G4VGA3|G4VGA3_SCHMA Prolyl oligopeptidase (S09 family) OS=Schistosoma mansoni GN=Smp_210740 PE=3 SV=1	14	62.997	-1.74984	18.3219	18.6228	18.8345	18.593	20.0309	20.4431	20.5547	20.3429
G4VGA5	tr|G4VGA5|G4VGA5_SCHMA Sodium/potassium-transporting ATPase subunit alpha OS=Schistosoma mansoni GN=Smp_015020 PE=3 SV=1	12	113.48	-5.48765			13.6571	13.6571	19.2455	19.7235	18.4652	19.1448
G4VGA8	tr|G4VGA8|G4VGA8_SCHMA Uncharacterized protein OS=Schistosoma mansoni GN=Smp_130330 PE=4 SV=1	3	47.835	1.25584	18.3986	18.0811	18.0753	18.185	16.2499	17.6084		16.9292
G4VGA9;G4VGB0	tr|G4VGA9|G4VGA9_SCHMA Putative vacuolar ATP synthase subunit h OS=Schistosoma mansoni GN=Smp_015070.1 PE=4 SV=1;tr|G4VGB0|G4VGB0_SCHMA Putative vacuolar ATP synthase subunit h OS=Schistosoma mansoni GN=Smp_015070.2 PE=4 SV=1	5	28.274	-0.193714	18.0715	18.593	18.2284	18.2976	18.3779	18.462	18.6342	18.4913
G4VGB4	tr|G4VGB4|G4VGB4_SCHMA Coatomer subunit beta OS=Schistosoma mansoni GN=Smp_015090 PE=3 SV=1	21	108.8	-0.681895	19.2954	19.0979	20.1306	19.508	19.9405	20.3409	20.2882	20.1899
G4VGC4	tr|G4VGC4|G4VGC4_SCHMA Uncharacterized protein OS=Schistosoma mansoni GN=Smp_181260 PE=4 SV=1	8	238.78	-2.64103		13.0031	13.0769	13.04	15.5191	16.608	14.9159	15.681
G4VGD2	tr|G4VGD2|G4VGD2_SCHMA Uncharacterized protein OS=Schistosoma mansoni GN=Smp_194730 PE=4 SV=1	6	162.76	-0.118848	13.8466		16.2615	15.054	15.8122	15.2072	14.4993	15.1729
G4VGD5	tr|G4VGD5|G4VGD5_SCHMA Family S33 non-peptidase homologue (S33 family) OS=Schistosoma mansoni GN=Smp_194720 PE=4 SV=1	4	39.819	0.956821	18.1809	18.5804	18.486	18.4158	18.3536	14.8884	19.1348	17.4589
G4VGD8	tr|G4VGD8|G4VGD8_SCHMA Uncharacterized protein OS=Schistosoma mansoni GN=Smp_121810 PE=4 SV=1	3	52.096	0.699142	15.2269	16.168	17.1209	16.1719	15.6036	14.5992	16.2156	15.4728
G4VGE0	tr|G4VGE0|G4VGE0_SCHMA Putative replication factor A 1, rfa1 OS=Schistosoma mansoni GN=Smp_121800 PE=4 SV=1	11	61.872	-0.663883	19.4827	19.9671	20.4338	19.9612	20.4815	20.9312	20.4625	20.6251
G4VGE1	tr|G4VGE1|G4VGE1_SCHMA Putative 50s ribosomal protein L13 OS=Schistosoma mansoni GN=Smp_121790.1 PE=3 SV=1	5	23.407	0.855998	19.8137	19.4927	19.7132	19.6732	18.6341	18.6736	19.1439	18.8172
G4VGE6	tr|G4VGE6|G4VGE6_SCHMA Uncharacterized protein OS=Schistosoma mansoni GN=Smp_194650 PE=4 SV=1	23	158.36	-2.32702	16.8855	16.6944	18.1268	17.2356	19.4932	19.6598	19.5348	19.5626
G4VGE8	tr|G4VGE8|G4VGE8_SCHMA Putative 26s proteasome non-ATPase regulatory subunit OS=Schistosoma mansoni GN=Smp_052870 PE=4 SV=1	21	45.086	-0.257399	22.4806	22.6595	22.6316	22.5906	22.8653	23.1044	22.5742	22.848
G4VGF1	tr|G4VGF1|G4VGF1_SCHMA Uncharacterized protein OS=Schistosoma mansoni GN=Smp_052890 PE=4 SV=1	4	32.313	2.59341	19.853	19.9027	19.7354	19.8304	16.7015	17.7724		17.237
G4VGF4	tr|G4VGF4|G4VGF4_SCHMA Skp1-related OS=Schistosoma mansoni GN=Smp_052910 PE=3 SV=1	7	18.702	-1.44533	19.965	20.4596	19.5787	20.0011	21.3047	21.4658	21.5688	21.4464
G4VGG1;G4VGG0	tr|G4VGG1|G4VGG1_SCHMA Putative proteasome inhibitor OS=Schistosoma mansoni GN=Smp_066340.1 PE=4 SV=1;tr|G4VGG0|G4VGG0_SCHMA Putative proteasome inhibitor OS=Schistosoma mansoni GN=Smp_066340.2 PE=4 SV=1	8	34.259	-0.133994	19.6806	19.9121	19.7528	19.7818	19.6672	20.4775	19.6027	19.9158
G4VGG6	tr|G4VGG6|G4VGG6_SCHMA Uncharacterized protein OS=Schistosoma mansoni GN=Smp_066290 PE=4 SV=1	4	160.81	M only				N/A	12.6503	13.3701	15.2063	13.7423
G4VGH2	tr|G4VGH2|G4VGH2_SCHMA Uncharacterized protein OS=Schistosoma mansoni GN=Smp_099800 PE=4 SV=1	29	246.1	-2.65091	14.7075	16.3822	17.8279	16.3059	18.8811	18.3926	19.5966	18.9568
G4VGH3	tr|G4VGH3|G4VGH3_SCHMA Uncharacterized protein OS=Schistosoma mansoni GN=Smp_099810 PE=4 SV=1	3	27.989	-1.90386		16.1216	16.9536	16.5376	18.3307	17.8354	19.1582	18.4414
G4VGH9	tr|G4VGH9|G4VGH9_SCHMA Putative uridine phosphorylase OS=Schistosoma mansoni GN=Smp_082420 PE=1 SV=1	19	32.7	-3.40222	19.9402	20.0861	20.7466	20.2576	23.7287	23.9994	23.2514	23.6598
G4VGI0	tr|G4VGI0|G4VGI0_SCHMA Putative uridine phosphorylase OS=Schistosoma mansoni GN=Smp_082430 PE=1 SV=1	3	32.608	M only				N/A	19.0653	19.2178	18.8883	19.0571
G4VGI6	tr|G4VGI6|G4VGI6_SCHMA Uncharacterized protein OS=Schistosoma mansoni GN=Smp_166820 PE=4 SV=1	10	108.31	-0.272091	18.3756	17.8418	17.5953	17.9376	18.3847	18.3259	17.9183	18.2097
G4VGJ0	tr|G4VGJ0|G4VGJ0_SCHMA Putative transcription initiation factor tfiid OS=Schistosoma mansoni GN=Smp_166840 PE=4 SV=1	2	245.82	-0.843633	13.9188	12.5437	14.4824	13.6483	14.4919			14.4919
G4VGJ4;G4VGJ3	tr|G4VGJ4|G4VGJ4_SCHMA Putative transient receptor potential channel 2 isoform 3 OS=Schistosoma mansoni GN=Smp_074070.2 PE=4 SV=1;tr|G4VGJ3|G4VGJ3_SCHMA Putative transient receptor potential channel 2 isoform 3 OS=Schistosoma mansoni GN=Smp_074070.1 PE=4 S	4	64.386	-0.456783	16.3855	16.0125	15.4079	15.9353	16.3872		16.397	16.3921
G4VGJ9	tr|G4VGJ9|G4VGJ9_SCHMA Putative alpha adaptin carboxyl-terminal domain OS=Schistosoma mansoni GN=Smp_074020 PE=4 SV=1	21	106.71	-2.48288	14.6673	17.9376	17.2178	16.6076	19.2883	18.5855	19.3976	19.0905
G4VGK2	tr|G4VGK2|G4VGK2_SCHMA Uncharacterized protein OS=Schistosoma mansoni GN=Smp_040450 PE=4 SV=1	8	40.169	2.44013	18.4977	19.7563	20.2962	19.5167	16.0339	16.4897	18.7061	17.0766
G4VGL2	tr|G4VGL2|G4VGL2_SCHMA Isocitrate dehydrogenase [NAD] subunit, mitochondrial OS=Schistosoma mansoni GN=Smp_018680 PE=3 SV=1	9	41.344	-0.69466	21.2949	21.2913	21.4795	21.3552	22.2511	22.2119	21.6867	22.0499
G4VGL9	tr|G4VGL9|G4VGL9_SCHMA Paraplegin (M41 family) OS=Schistosoma mansoni GN=Smp_018620 PE=3 SV=1	11	69.883	-0.267382	18.0328	17.7677	18.291	18.0305	18.1002	18.3225	18.4709	18.2979
G4VGM8;G4VGM9	tr|G4VGM8|G4VGM8_SCHMA Putative nascent polypeptide associated complex alpha subunit (Nac alpha) OS=Schistosoma mansoni GN=Smp_018530.1 PE=4 SV=1;tr|G4VGM9|G4VGM9_SCHMA Putative nascent polypeptide associated complex alpha subunit (Nac alpha) OS=Schistosom	9	22.456	0.85568	24.1964	24.1449	24.0406	24.1273	23.5114	22.9534	23.3501	23.2716
G4VGN0	tr|G4VGN0|G4VGN0_SCHMA Kinesin-like protein OS=Schistosoma mansoni GN=Smp_132300 PE=3 SV=1	8	86.083	0.997885	19.861	19.9338	19.877	19.8906	19.1955	17.2362	20.2464	18.8927
G4VGN6	tr|G4VGN6|G4VGN6_SCHMA Putative phosphatidylinositol 4-kinase type-II OS=Schistosoma mansoni GN=Smp_018460 PE=4 SV=1	3	66.345	0.0952137	14.8483	15.8759	15.7997	15.508	15.4128			15.4128
G4VGQ5	tr|G4VGQ5|G4VGQ5_SCHMA Glycogen [starch] synthase OS=Schistosoma mansoni GN=Smp_018260 PE=3 SV=1	5	80.688	-1.37112		16.0202	12.4339	14.227	16.4895	13.0849	17.2201	15.5981
G4VGQ7;G4VGQ6	tr|G4VGQ7|G4VGQ7_SCHMA Putative troponin I OS=Schistosoma mansoni GN=Smp_018250.1 PE=4 SV=1;tr|G4VGQ6|G4VGQ6_SCHMA Putative troponin I OS=Schistosoma mansoni GN=Smp_018250.2 PE=4 SV=1	7	26.274	0.514644	22.4495	22.6827	21.8909	22.341	21.4274	21.6092	22.4425	21.8264
G4VGR1	tr|G4VGR1|G4VGR1_SCHMA Putative 30s ribosomal protein S8 OS=Schistosoma mansoni GN=Smp_076740 PE=3 SV=1	7	14.976	0.743576	23.9014	23.5882	23.1437	23.5444	22.6458	22.0974	23.6594	22.8009
G4VGR5;G4VGR4	tr|G4VGR5|G4VGR5_SCHMA Uncharacterized protein OS=Schistosoma mansoni GN=Smp_097090.1 PE=4 SV=1;tr|G4VGR4|G4VGR4_SCHMA Uncharacterized protein OS=Schistosoma mansoni GN=Smp_097090.2 PE=4 SV=1	9	61.726	0.672387	15.123	16.8031	17.6025	16.5095			15.8372	15.8372
G4VGS4;G4VGS3;G4VGS2	tr|G4VGS4|G4VGS4_SCHMA Serine/threonine-protein phosphatase OS=Schistosoma mansoni GN=Smp_028990.1 PE=3 SV=1;tr|G4VGS3|G4VGS3_SCHMA Serine/threonine-protein phosphatase OS=Schistosoma mansoni GN=Smp_028990.3 PE=3 SV=1;tr|G4VGS2|G4VGS2_SCHMA Serine/threonin	6	37.408	-0.00183676	19.719	19.8922	18.6709	19.4274	18.9169	19.2633	20.1074	19.4292
G4VGS9	tr|G4VGS9|G4VGS9_SCHMA Uncharacterized protein OS=Schistosoma mansoni GN=Smp_137830 PE=4 SV=1	3	175.87	1.84186	16.1174	14.4721	14.3122	14.9672		13.1253		13.1253
G4VGT4	tr|G4VGT4|G4VGT4_SCHMA Ubiquinone biosynthesis O-methyltransferase, mitochondrial OS=Schistosoma mansoni GN=Smp_029060 PE=3 SV=1	3	32.405	0.295788	18.6231	18.5149	18.2958	18.4779	18.2898	17.8304	18.4262	18.1822
G4VGT9;G4VGU0	tr|G4VGT9|G4VGT9_SCHMA Uncharacterized protein OS=Schistosoma mansoni GN=Smp_029100.1 PE=4 SV=1;tr|G4VGU0|G4VGU0_SCHMA Uncharacterized protein OS=Schistosoma mansoni GN=Smp_029100.2 PE=4 SV=1	4	13.912	1.02339	21.6005	21.3371	21.355	21.4309	20.5877	20.3554	20.2794	20.4075
G4VGU2	tr|G4VGU2|G4VGU2_SCHMA Putative chloride intracellular channel OS=Schistosoma mansoni GN=Smp_137920 PE=4 SV=1	8	29.75	-1.38708	20.4667	21.2276	20.9845	20.893	22.4346	22.3169	22.0886	22.28
G4VGU5	tr|G4VGU5|G4VGU5_SCHMA Putative cytochrome c oxidase copper chaperone OS=Schistosoma mansoni GN=Smp_029150 PE=4 SV=1	4	20.778	0.201184	19.2934	19.6058	19.1362	19.3452	18.8754	19.4744	19.0821	19.144
G4VGV3	tr|G4VGV3|G4VGV3_SCHMA Uncharacterized protein OS=Schistosoma mansoni GN=Smp_029230 PE=4 SV=1	3	10.599	1.38252	20.0566	20.0936	19.3843	19.8448	18.9537	18.2968	18.1364	18.4623
G4VGW4	tr|G4VGW4|G4VGW4_SCHMA Serine hydroxymethyltransferase OS=Schistosoma mansoni GN=Smp_179710 PE=3 SV=1	16	50.437	0.0469115	21.5725	21.5991	21.5031	21.5582	21.6886	21.3924	21.453	21.5113
G4VGW5	tr|G4VGW5|G4VGW5_SCHMA Uncharacterized protein OS=Schistosoma mansoni GN=Smp_177190 PE=4 SV=1	5	37.134	M only				N/A	18.2315	18.6975	18.4521	18.4604
G4VGW6	tr|G4VGW6|G4VGW6_SCHMA Protein regulator of cytokinesis 1 prc1-related OS=Schistosoma mansoni GN=Smp_169210 PE=4 SV=1	2	28.354	M only				N/A	17.6042	17.7729	17.789	17.722
G4VGX1	tr|G4VGX1|G4VGX1_SCHMA Putative actin-depolymerizing factor OS=Schistosoma mansoni GN=Smp_086590 PE=3 SV=1	8	16.41	0.505889	22.2582	22.086	22.0237	22.1226	21.8681	21.0254	21.9567	21.6167
G4VGX2	tr|G4VGX2|G4VGX2_SCHMA Putative arginine/serine-rich splicing factor OS=Schistosoma mansoni GN=Smp_086600.2 PE=4 SV=1	6	31.406	1.15022	19.7237	19.4677	19.9474	19.7129	18.8223	17.1666	19.6992	18.5627
G4VGX6	tr|G4VGX6|G4VGX6_SCHMA Uncharacterized protein OS=Schistosoma mansoni GN=Smp_131860 PE=3 SV=1	6	51.802	0.884919	17.664	15.5799	16.9922	16.7454	15.053		16.6678	15.8604
G4VGX9	tr|G4VGX9|G4VGX9_SCHMA Putative syntaxin binding protein-1,2,3 OS=Schistosoma mansoni GN=Smp_131870 PE=3 SV=1	15	66.586	1.51735	19.5923	19.707	19.4895	19.5963	18.0085	17.8446	18.3837	18.0789
G4VGY0	tr|G4VGY0|G4VGY0_SCHMA Putative nucleolar complex protein OS=Schistosoma mansoni GN=Smp_017640 PE=4 SV=1	4	44.108	1.70773	16.8419	18.0464	17.1255	17.3379	16.0896	15.0493	15.7516	15.6302
G4VH00	tr|G4VH00|G4VH00_SCHMA Putative pur-alpha OS=Schistosoma mansoni GN=Smp_075120 PE=4 SV=1	14	33.754	1.96689	21.9704	21.9287	22.0731	21.9907	19.9356	19.198	20.938	20.0239
G4VH08	tr|G4VH08|G4VH08_SCHMA Uncharacterized protein OS=Schistosoma mansoni GN=Smp_075040 PE=4 SV=1	2	14.014	0.313001	17.0939	18.678		17.8859	17.4195	18.1754	17.124	17.5729
G4VH12	tr|G4VH12|G4VH12_SCHMA Putative ubiquitin-activating enzyme e1 OS=Schistosoma mansoni GN=Smp_162630.1 PE=4 SV=1	32	102.42	-0.0343421	21.4909	21.7693	21.7386	21.6663	21.6987	21.4271	21.9761	21.7006
G4VH14	tr|G4VH14|G4VH14_SCHMA Family S9 non-peptidase homologue (S09 family) OS=Schistosoma mansoni GN=Smp_074940 PE=4 SV=1	2	38.72	F only	15.2572	16.5691	15.336	15.7208				N/A
G4VH20	tr|G4VH20|G4VH20_SCHMA Uncharacterized protein OS=Schistosoma mansoni GN=Smp_074870 PE=4 SV=1	8	29.818	1.37001	21.8645	22.0552	22.144	22.0213	20.573	20.3707	21.01	20.6512
G4VH28	tr|G4VH28|G4VH28_SCHMA Putative 40s ribosomal protein S18 OS=Schistosoma mansoni GN=Smp_074780 PE=3 SV=1	10	17.769	1.21011	25.3763	25.0383	24.8526	25.0891	23.985	23.3842	24.2678	23.879
G4VH38	tr|G4VH38|G4VH38_SCHMA DNA-directed RNA polymerase subunit OS=Schistosoma mansoni GN=Smp_129500 PE=3 SV=1	8	198.33	0.84324	14.8637	14.4793	15.5028	14.9486	13.666	13.0798	15.5702	14.1053
G4VH46;G4VH47	tr|G4VH46|G4VH46_SCHMA Putative ribosomal protein S2 OS=Schistosoma mansoni GN=Smp_013470.2 PE=3 SV=1;tr|G4VH47|G4VH47_SCHMA Putative ribosomal protein S2 OS=Schistosoma mansoni GN=Smp_013470.1 PE=3 SV=1	12	28.196	0.693219	21.461	20.821	21.1805	21.1542	19.2327	18.7492	23.4009	20.4609
G4VH48	tr|G4VH48|G4VH48_SCHMA Secretory carrier-associated membrane protein OS=Schistosoma mansoni GN=Smp_013460 PE=3 SV=1	4	36.975	-1.71377	17.7431	16.8129	18.3107	17.6222	18.9247	19.4904	19.5929	19.336
G4VH53	tr|G4VH53|G4VH53_SCHMA Uncharacterized protein OS=Schistosoma mansoni GN=Smp_129410 PE=4 SV=1	12	23.372	-0.387005	23.2069	22.5959	22.3394	22.714	23.2796	22.9448	23.0788	23.1011
G4VH57	tr|G4VH57|G4VH57_SCHMA Huntingtin interacting protein-related OS=Schistosoma mansoni GN=Smp_056640 PE=4 SV=1	5	93.427	0.454353	16.2496	15.9791	17.3415	16.5234	14.7463		17.3918	16.069
G4VH65	tr|G4VH65|G4VH65_SCHMA Microsomal GST-3 OS=Schistosoma mansoni GN=Smp_055210 PE=4 SV=1	7	17.961	-0.761173	22.8487	23.2365	23.8055	23.2969	23.9497	23.5837	24.6408	24.0581
G4VH66	tr|G4VH66|G4VH66_SCHMA Dolichyl-diphosphooligosaccharide-proteinglycos yl transferase-related OS=Schistosoma mansoni GN=Smp_055200 PE=4 SV=1	5	37.97	-1.35445		15.3303	18.8125	17.0714	17.6114	18.1853	19.4809	18.4259
G4VH75	tr|G4VH75|G4VH75_SCHMA Uncharacterized protein OS=Schistosoma mansoni GN=Smp_151480 PE=4 SV=1	6	56.929	1.74122	18.363	18.6707	18.098	18.3773	16.6525	16.1369	17.1188	16.636
G4VH80	tr|G4VH80|G4VH80_SCHMA Putative 40s ribosomal protein S17 OS=Schistosoma mansoni GN=Smp_055050 PE=3 SV=1	2	14.02	1.30491	23.5121	23.703	23.4283	23.5478	22.1747	21.7337	22.8203	22.2429
G4VH85	tr|G4VH85|G4VH85_SCHMA Orotidine 5-phosphate decarboxylase OS=Schistosoma mansoni GN=Smp_050540 PE=3 SV=1	7	50.177	0.18512	18.1025	19.1548	19.151	18.8028	19.1842	18.1647	18.504	18.6176
G4VH87;G4VH86;G4VH88	tr|G4VH87|G4VH87_SCHMA Restin-like OS=Schistosoma mansoni GN=Smp_149200.3 PE=4 SV=1;tr|G4VH86|G4VH86_SCHMA Restin-like OS=Schistosoma mansoni GN=Smp_149200.2 PE=4 SV=1;tr|G4VH88|G4VH88_SCHMA Restin-like OS=Schistosoma mansoni GN=Smp_149200.1 PE=4 SV=1	25	156.18	-0.108568	18.0083	18.2991	18.3285	18.212	18.1913	18.2115	18.5588	18.3205
G4VH94	tr|G4VH94|G4VH94_SCHMA Uncharacterized protein OS=Schistosoma mansoni GN=Smp_050470 PE=4 SV=1	11	105.64	2.0857	18.0909	18.4905	19.0205	18.534	16.2705	17.02	16.0543	16.4483
G4VH95	tr|G4VH95|G4VH95_SCHMA Putative acyl-CoA-binding protein (Acbp) (Diazepam binding inhibitor) (Dbi) (Endozepine) OS=Schistosoma mansoni GN=Smp_149150 PE=4 SV=1	2	38.151	-0.0522964	18.8398	19.4623	18.8414	19.0478	19.2129	19.0753	19.0121	19.1001
G4VH98	tr|G4VH98|G4VH98_SCHMA Putative fimbrin/plastin OS=Schistosoma mansoni GN=Smp_149130 PE=4 SV=1	15	101.51	-5.53151	14.5251	12.8055		13.6653	19.2731	19.3466	18.9707	19.1968
G4VH99	tr|G4VH99|G4VH99_SCHMA Putative insect origin recognition complex subunit OS=Schistosoma mansoni GN=Smp_149120 PE=4 SV=1	5	210.63	0.046393	15.9614	15.138	16.3297	15.8097	16.4486	15.2225	15.6188	15.7633
G4VHA2	tr|G4VHA2|G4VHA2_SCHMA Putative dead box ATP-dependent RNA helicase OS=Schistosoma mansoni GN=Smp_210260 PE=3 SV=1	3	69.356	0.347825	15.4924	16.1339	14.915	15.5137	14.6668	15.6651		15.1659
G4VHA9	tr|G4VHA9|G4VHA9_SCHMA Putative nedd8-conjugating enzyme nce2 OS=Schistosoma mansoni GN=Smp_027370 PE=3 SV=1	6	21.213	-0.0818506	20.9873	21.1784	21.0766	21.0808	21.1748	21.3921	20.9209	21.1626
G4VHB0	tr|G4VHB0|G4VHB0_SCHMA Uncharacterized protein OS=Schistosoma mansoni GN=Smp_027360 PE=4 SV=1	2	10.31	-0.321465	20.2036	18.8475	19.4584	19.5032	20.0404	19.6351	19.7983	19.8246
G4VHB1	tr|G4VHB1|G4VHB1_SCHMA Putative dynactin subunit 3 (Dynactin light chain p24) OS=Schistosoma mansoni GN=Smp_136990 PE=4 SV=1	2	16.097	0.242113	18.6139	19.0684	18.3579	18.6801	17.7139	19.006	18.594	18.438
G4VHB4	tr|G4VHB4|G4VHB4_SCHMA Structural maintenance of chromosomes protein OS=Schistosoma mansoni GN=Smp_136970 PE=3 SV=1	23	143.75	-1.09418	18.243	17.8341	18.2041	18.0937	18.9439	19.519	19.1009	19.1879
G4VHB5	tr|G4VHB5|G4VHB5_SCHMA Putative sideroflexin 1,2,3 OS=Schistosoma mansoni GN=Smp_136960 PE=4 SV=1	16	164.53	-1.07652	18.6019	18.3058	18.5495	18.4857	19.3745	18.7806	20.5317	19.5622
G4VHB9	tr|G4VHB9|G4VHB9_SCHMA Elav (Embryonic lethal, abnormal vision,drosophila)-like protein OS=Schistosoma mansoni GN=Smp_194950 PE=4 SV=1	8	59.737	M only				N/A	18.8681	18.9614	18.856	18.8951
G4VHC0	tr|G4VHC0|G4VHC0_SCHMA PRX_like2 domain-containing protein OS=Schistosoma mansoni GN=Smp_194940 PE=4 SV=1	3	22.665	-1.79413	15.7514		15.9621	15.8568	17.3316	17.9509	17.6702	17.6509
G4VHD9	tr|G4VHD9|G4VHD9_SCHMA T-complex protein 1 subunit delta OS=Schistosoma mansoni GN=Smp_004600 PE=3 SV=1	25	58.047	0.0153438	24.0494	24.4402	24.5805	24.3567	24.4909	24.1393	24.3939	24.3414
G4VHE4	tr|G4VHE4|G4VHE4_SCHMA Harp (Smarcal1)-related OS=Schistosoma mansoni GN=Smp_131000 PE=3 SV=1	3	79.125	-1.07158	14.1445	14.942	12.6411	13.9092		14.9442	15.0173	14.9808
G4VHE9;G4VHF0	tr|G4VHE9|G4VHE9_SCHMA Putative gtp-binding protein (I) alpha-2 subunit, gnai2 OS=Schistosoma mansoni GN=Smp_016250.1 PE=4 SV=1;tr|G4VHF0|G4VHF0_SCHMA Putative gtp-binding protein (I) alpha-2 subunit, gnai2 OS=Schistosoma mansoni GN=Smp_016250.2 PE=4 SV=1	2	39.938	-2.2755		15.6652	16.8603	16.2628	18.2068	19.0279	18.3802	18.5383
G4VHF4	tr|G4VHF4|G4VHF4_SCHMA Putative camp-dependent protein kinase type II regulatory subunit OS=Schistosoma mansoni GN=Smp_131050 PE=4 SV=1	4	33.82	1.8374	17.6677	17.4949	17.7279	17.6301	16.1839	16.0344	15.16	15.7927
G4VHG0	tr|G4VHG0|G4VHG0_SCHMA Uncharacterized protein OS=Schistosoma mansoni GN=Smp_131080 PE=4 SV=1	2	27.353	-1.70196	16.7444		16.6868	16.7156	18.8563	17.8543	18.5421	18.4176
G4VHG1	tr|G4VHG1|G4VHG1_SCHMA Putative ran-binding protein OS=Schistosoma mansoni GN=Smp_016410 PE=4 SV=1	36	225.79	0.485831	20.8054	20.659	20.7938	20.7527	20.2095	20.2871	20.3041	20.2669
G4VHG2	tr|G4VHG2|G4VHG2_SCHMA Putative cornichon OS=Schistosoma mansoni GN=Smp_131090 PE=4 SV=1	5	168.99	-0.774974	16.5499	16.0207	16.0979	16.2228	17.2599	17.4306	16.3029	16.9978
G4VHH8	tr|G4VHH8|G4VHH8_SCHMA Polymyositis/scleroderma autoantigen-related OS=Schistosoma mansoni GN=Smp_131150 PE=4 SV=1	9	94.53	2.81211	15.92	16.6978	16.8679	16.4952	11.8471	14.8721	14.3302	13.6831
G4VHI6	tr|G4VHI6|G4VHI6_SCHMA Putative n-terminal acetyltransferase complex ard1 subunit OS=Schistosoma mansoni GN=Smp_050590 PE=4 SV=1	9	20.211	0.361067	20.9507	21.0234	20.8395	20.9379	20.4889	20.6171	20.6244	20.5768
G4VHJ2	tr|G4VHJ2|G4VHJ2_SCHMA Putative rab-2,4,14 OS=Schistosoma mansoni GN=Smp_055670 PE=4 SV=1	7	25.117	-1.76515	18.5119	19.0217	18.8062	18.7799	20.6844	20.8059	20.1449	20.5451
G4VHJ9;G4VHJ8;G4VHJ7	tr|G4VHJ9|G4VHJ9_SCHMA Putative Microrchidia 2a OS=Schistosoma mansoni GN=Smp_055720.1 PE=4 SV=1;tr|G4VHJ8|G4VHJ8_SCHMA Uncharacterized protein OS=Schistosoma mansoni GN=Smp_055720.3 PE=4 SV=1;tr|G4VHJ7|G4VHJ7_SCHMA Putative microrchidia 2a OS=Schistosoma	10	98.714	-0.927913	15.0093	15.9749	16.6356	15.8733	17.2111	15.1812	18.0112	16.8012
G4VHK2	tr|G4VHK2|G4VHK2_SCHMA Family M41 unassigned peptidase (M41 family) OS=Schistosoma mansoni GN=Smp_055760.1 PE=3 SV=1	1	61.428	0.184262	14.9901	15.2895	15.2283	15.1693	14.9052	15.1081	14.9419	14.9851
G4VHK8;G4VTA4	tr|G4VHK8|G4VHK8_SCHMA Tubulin beta chain OS=Schistosoma mansoni GN=Smp_192110 PE=3 SV=1;tr|G4VTA4|G4VTA4_SCHMA Tubulin beta chain OS=Schistosoma mansoni GN=Smp_079960 PE=3 SV=1	36	49.816	-0.392401	27.1131	27.1331	26.9692	27.0718	27.4314	27.4096	27.5515	27.4642
G4VHL2	tr|G4VHL2|G4VHL2_SCHMA Gamma-glutamyltransferase-like protein 3 (T03 family) OS=Schistosoma mansoni GN=Smp_089100 PE=4 SV=1	4	58.591	-2.34928		14.1241		14.1241	15.911	16.3778	17.1313	16.4733
G4VHL4	tr|G4VHL4|G4VHL4_SCHMA Proteasome endopeptidase complex OS=Schistosoma mansoni GN=Smp_170730 PE=3 SV=1	14	72.443	0.17675	22.2321	22.3712	22.0248	22.2094	22.1638	22.254	21.68	22.0326
G4VHL5;G4VHL7;G4VHL6	tr|G4VHL5|G4VHL5_SCHMA Putative eukaryotic translation initiation factor 4h OS=Schistosoma mansoni GN=Smp_089060.2 PE=4 SV=1;tr|G4VHL7|G4VHL7_SCHMA Putative eukaryotic translation initiation factor 4h OS=Schistosoma mansoni GN=Smp_089060.3 PE=4 SV=1;tr|G4V	6	24.903	0.559093	21.8475	21.6504	21.4355	21.6445	20.565	21.6741	21.0171	21.0854
G4VHM2	tr|G4VHM2|G4VHM2_SCHMA Proline dehydrogenase OS=Schistosoma mansoni GN=Smp_170690 PE=3 SV=1	4	65.984	-1.2745			13.9147	13.9147	14.883	15.0412	15.6435	15.1892
G4VHM5;G4VHM6	tr|G4VHM5|G4VHM5_SCHMA Putative translocon-associated protein, delta subunit OS=Schistosoma mansoni GN=Smp_089000.1 PE=4 SV=1;tr|G4VHM6|G4VHM6_SCHMA Putative translocon-associated protein, delta subunit OS=Schistosoma mansoni GN=Smp_089000.2 PE=4 SV=1	2	14.561	0.232753	17.7884	18.9232	18.8871	18.5329	18.0301	18.8479	18.0224	18.3001
G4VHN1	tr|G4VHN1|G4VHN1_SCHMA Putative importin beta-1 OS=Schistosoma mansoni GN=Smp_038080.1 PE=4 SV=1	28	101.21	0.515065	22.8404	22.96	22.6951	22.8318	22.3592	22.4068	22.1843	22.3168
G4VHN3	tr|G4VHN3|G4VHN3_SCHMA ATP synthase subunit beta OS=Schistosoma mansoni GN=Smp_038100 PE=3 SV=1	24	55.836	0.298922	25.4623	25.4139	25.5278	25.468	25.2265	25.2939	24.9868	25.1691
G4VHP2;G4VHP3	tr|G4VHP2|G4VHP2_SCHMA Putative o-methyltransferase OS=Schistosoma mansoni GN=Smp_052470 PE=4 SV=1;tr|G4VHP3|G4VHP3_SCHMA Putative o-methyltransferase OS=Schistosoma mansoni GN=Smp_012560 PE=4 SV=1	1	15.482	-0.799826	17.8124	18.0849	17.7287	17.8753	18.5598	19.1798	18.2858	18.6751
G4VHP4	tr|G4VHP4|G4VHP4_SCHMA Putative cullin OS=Schistosoma mansoni GN=Smp_150270 PE=3 SV=1	14	98.502	-1.42172	17.0724	17.4991	18.1257	17.5657	18.849	18.9628	19.1505	18.9874
G4VHP9	tr|G4VHP9|G4VHP9_SCHMA Beta-hexosaminidase OS=Schistosoma mansoni GN=Smp_053900 PE=3 SV=1	5	60.937	-1.23146	16.184	16.7801	15.6659	16.21	17.8279	17.7449	16.7514	17.4414
G4VHQ2	tr|G4VHQ2|G4VHQ2_SCHMA 3-hydroxyacyl-CoA dehydrogenase OS=Schistosoma mansoni GN=Smp_151030 PE=3 SV=1	12	26.617	0.823313	22.6704	22.8412	22.9848	22.8322	22.1526	21.4585	22.4154	22.0089
G4VHQ4	tr|G4VHQ4|G4VHQ4_SCHMA Putative heterogeneous nuclear ribonucleoprotein OS=Schistosoma mansoni GN=Smp_053940.1 PE=4 SV=1	12	33.931	0.607102	24.3283	24.3829	24.0399	24.2504	23.6814	23.6497	23.5988	23.6433
G4VHQ8	tr|G4VHQ8|G4VHQ8_SCHMA Putative heat shock protein 70 (Hsp70)-interacting protein OS=Schistosoma mansoni GN=Smp_053990 PE=4 SV=1	13	58.91	0.503204	20.7504	20.536	20.2012	20.4959	20.0425	20.1517	19.7838	19.9927
G4VHS0	tr|G4VHS0|G4VHS0_SCHMA Putative 40s ribosomal protein S14 OS=Schistosoma mansoni GN=Smp_053830 PE=3 SV=1	9	16.319	1.14538	26.0952	26.0477	26.0778	26.0736	24.9977	24.9421	24.8448	24.9282
G4VHS1	tr|G4VHS1|G4VHS1_SCHMA Putative preprotein translocase secy subunit (Sec61) OS=Schistosoma mansoni GN=Smp_053820 PE=3 SV=1	3	52.037	-1.0698	18.1085	17.0847	19.7262	18.3065	19.16	19.5233	19.4455	19.3763
G4VHT7	tr|G4VHT7|G4VHT7_SCHMA Protein kinase OS=Schistosoma mansoni GN=Smp_141580 PE=4 SV=1	2	120.64	0.724524	17.1129		16.4337	16.7733	18.3075	18.3409	11.4979	16.0488
G4VHU1	tr|G4VHU1|G4VHU1_SCHMA Uncharacterized protein OS=Schistosoma mansoni GN=Smp_036090 PE=4 SV=1	4	74.576	1.21675	16.7487	16.4384	16.6771	16.6214	14.8174	15.9919		15.4046
G4VHV0	tr|G4VHV0|G4VHV0_SCHMA Putative sugar transporter OS=Schistosoma mansoni GN=Smp_156040 PE=3 SV=1	1	187.16	M only				N/A	12.4682	12.6771	12.8642	12.6698
G4VHV1	tr|G4VHV1|G4VHV1_SCHMA Serine/threonine kinase OS=Schistosoma mansoni GN=Smp_171370 PE=4 SV=1	3	58.493	-4.81654		13.3512		13.3512	18.22	18.2964	17.9868	18.1677
G4VHV6	tr|G4VHV6|G4VHV6_SCHMA Filamin-related OS=Schistosoma mansoni GN=Smp_198050 PE=4 SV=1	22	64.838	-0.444101	21.9247	21.9703	22.0803	21.9918	22.5232	22.6183	22.1661	22.4359
G4VHW1	tr|G4VHW1|G4VHW1_SCHMA Uncharacterized protein OS=Schistosoma mansoni GN=Smp_158930 PE=4 SV=1	22	155.74	M only				N/A	14.7863	13.2505	19.6064	15.8811
G4VHW2	tr|G4VHW2|G4VHW2_SCHMA Uracil-DNA glycosylase OS=Schistosoma mansoni GN=Smp_158920 PE=3 SV=1	11	89.617	-1.8621	17.6322	18.4055	18.2286	18.0888	19.8741	20.1954	19.7831	19.9509
G4VHW3	tr|G4VHW3|G4VHW3_SCHMA Cyclin-dependent kinases regulatory subunit OS=Schistosoma mansoni GN=Smp_158910 PE=3 SV=1	1	11.364	0.469494	19.8724	19.0501	19.3451	19.4225	19.391	19.4234	18.0447	18.953
G4VHW4	tr|G4VHW4|G4VHW4_SCHMA Protein kinase OS=Schistosoma mansoni GN=Smp_067810 PE=3 SV=1	8	41.376	0.504389	18.7603	19.1479	19.2457	19.0513	18.9973	17.9034	18.74	18.5469
G4VHX9	tr|G4VHX9|G4VHX9_SCHMA Proteasome endopeptidase complex OS=Schistosoma mansoni GN=Smp_092280 PE=3 SV=1	15	28.086	0.118784	23.3873	23.4569	23.2216	23.3553	23.3144	23.2997	23.0954	23.2365
G4VHY0	tr|G4VHY0|G4VHY0_SCHMA Uncharacterized protein OS=Schistosoma mansoni GN=Smp_172560 PE=4 SV=1	5	83.323	F only	18.5665	18.2737	19.4643	18.7682				N/A
G4VHY2	tr|G4VHY2|G4VHY2_SCHMA Uncharacterized protein OS=Schistosoma mansoni GN=Smp_172650 PE=4 SV=1	2	81.596	F only	13.2012	13.5131	13.4258	13.38				N/A
G4VHY6	tr|G4VHY6|G4VHY6_SCHMA Putative g10 protein homolog OS=Schistosoma mansoni GN=Smp_092380 PE=4 SV=1	7	16.946	0.323973	20.8383	20.8806	20.5174	20.7455	20.4352	20.4034	20.4259	20.4215
G4VHZ6;G4VHZ7	tr|G4VHZ6|G4VHZ6_SCHMA Putative ribose-phosphate pyrophosphokinase 1,2 OS=Schistosoma mansoni GN=Smp_052280.1 PE=4 SV=1;tr|G4VHZ7|G4VHZ7_SCHMA Putative ribose-phosphate pyrophosphokinase 1,2 OS=Schistosoma mansoni GN=Smp_052280.2 PE=4 SV=1	9	42.44	-0.681053	16.4074	17.0055	17.3319	16.9149	17.2809	16.4616	19.0453	17.596
G4VI00	tr|G4VI00|G4VI00_SCHMA Putative geranylgeranyl transferase type II beta subunit OS=Schistosoma mansoni GN=Smp_150160 PE=4 SV=1	4	39.584	-0.477623	18.6492	18.4196	18.8684	18.6457	19.2794	19.0181	19.0725	19.1233
G4VI02	tr|G4VI02|G4VI02_SCHMA Putative kunitz-type protease inhibitor OS=Schistosoma mansoni GN=Smp_052230 PE=4 SV=1	5	52.442	-2.52823		16.5836		16.5836	19.3061	19.5622	18.4673	19.1119
G4VI13	tr|G4VI13|G4VI13_SCHMA Transducin-like enhancer protein 1 OS=Schistosoma mansoni GN=Smp_150080 PE=4 SV=1	3	126.81	-0.66745	16.6218	15.0826	16.7381	16.1475	16.7243	17.2251	16.4954	16.815
G4VI16	tr|G4VI16|G4VI16_SCHMA Succinate--CoA ligase [ADP/GDP-forming] subunit alpha, mitochondrial OS=Schistosoma mansoni GN=Smp_052060 PE=3 SV=1	11	36.58	-0.347696	20.9292	21.1961	21.644	21.2565	22.0153	21.6678	21.1294	21.6042
G4VI21;G4VI20	tr|G4VI21|G4VI21_SCHMA Putative cell division protein kinase OS=Schistosoma mansoni GN=Smp_150040.1 PE=4 SV=1;tr|G4VI20|G4VI20_SCHMA Putative cell division protein kinase OS=Schistosoma mansoni GN=Smp_150040.2 PE=3 SV=1	6	41.797	-0.5548	17.156	18.0475	18.0819	17.7618	18.391	18.2403	18.3184	18.3166
G4VI38	tr|G4VI38|G4VI38_SCHMA Protein phosphatase methylesterase 1 (S33 family) OS=Schistosoma mansoni GN=Smp_211030 PE=4 SV=1	5	62.876	1.3147	15.8283	16.6569	16.1165	16.2006	13.956	15.9217	14.7799	14.8859
G4VI39	tr|G4VI39|G4VI39_SCHMA Protein phosphatase methylesterase 1 (S33 family) OS=Schistosoma mansoni GN=Smp_211040 PE=4 SV=1	7	38.434	0.159808	17.5862	19.2866	19.6728	18.8486	18.9155	17.5109	19.6399	18.6887
G4VI41	tr|G4VI41|G4VI41_SCHMA Putative chaperonin containing t-complex protein 1, eta subunit, tcph OS=Schistosoma mansoni GN=Smp_149900 PE=3 SV=1	31	59.064	-0.0904331	23.1092	23.4608	23.7263	23.4321	23.442	23.4306	23.695	23.5225
G4VI59	tr|G4VI59|G4VI59_SCHMA Palmitoyltransferase OS=Schistosoma mansoni GN=Smp_146700 PE=3 SV=1	1	68.012	M only				N/A	15.5869	15.3903	15.7836	15.5869
G4VI62	tr|G4VI62|G4VI62_SCHMA Annexin OS=Schistosoma mansoni GN=Smp_045560 PE=3 SV=1	17	36.885	-1.32342	23.6061	24.0476	23.9657	23.8731	25.2073	25.2909	25.0915	25.1965
G4VI66	tr|G4VI66|G4VI66_SCHMA Annexin OS=Schistosoma mansoni GN=Smp_045500 PE=3 SV=1	8	60.075	-2.34656	17.2052	17.6824	17.8188	17.5688	19.7975	20.2952	19.6533	19.9153
G4VI69	tr|G4VI69|G4VI69_SCHMA Acylaminoacyl-peptidase (S09 family) OS=Schistosoma mansoni GN=Smp_211050 PE=4 SV=1	12	94.086	-1.05841	18.5803	18.81	19.2972	18.8958	19.9196	20.1394	19.8038	19.9543
G4VI74	tr|G4VI74|G4VI74_SCHMA Acetyl-CoA synthetase OS=Schistosoma mansoni GN=Smp_168520 PE=4 SV=1	10	78.517	-3.55382	14.9575			14.9575	18.8489	18.5234	18.1616	18.5113
G4VI80;G4VI78;G4VI77;G4VI79;G4VI76;G4VI75	tr|G4VI80|G4VI80_SCHMA Uncharacterized protein OS=Schistosoma mansoni GN=Smp_038730.10 PE=4 SV=1;tr|G4VI78|G4VI78_SCHMA Uncharacterized protein OS=Schistosoma mansoni GN=Smp_038730.2 PE=4 SV=1;tr|G4VI77|G4VI77_SCHMA Uncharacterized protein OS=Schistosoma m	16	109.76	-3.29971	16.8142	16.4799	17.9283	17.0741	20.1531	20.3031	20.6654	20.3739
G4VI89	tr|G4VI89|G4VI89_SCHMA Putative small nuclear ribonucleoprotein G (Snrnp-G) OS=Schistosoma mansoni GN=Smp_038680 PE=4 SV=1	4	8.6009	-0.0941261	21.8544	22.7649	21.9622	22.1938	22.0073	22.3785	22.478	22.2879
G4VI91	tr|G4VI91|G4VI91_SCHMA alpha-1,2-Mannosidase OS=Schistosoma mansoni GN=Smp_143170 PE=3 SV=1	2	82.628	1.09653		16.062		16.062	14.0129	14.465	16.4186	14.9655
G4VI92	tr|G4VI92|G4VI92_SCHMA Cactin-related OS=Schistosoma mansoni GN=Smp_038640 PE=4 SV=1	5	81.329	-0.113463	15.3552	14.2421	15.4471	15.0148	14.8426		15.414	15.1283
G4VI95	tr|G4VI95|G4VI95_SCHMA Putative eukaryotic translation elongation factor OS=Schistosoma mansoni GN=Smp_143150 PE=4 SV=1	33	60.651	0.553966	25.2792	25.3284	25.2275	25.2784	24.7264	24.6719	24.7749	24.7244
G4VI96	tr|G4VI96|G4VI96_SCHMA Putative eukaryotic translation elongation factor OS=Schistosoma mansoni GN=Smp_143140 PE=4 SV=1	21	36.404	0.468916	24.5093	24.5305	24.7118	24.5839	24.0763	24.0283	24.2402	24.1149
G4VI97	tr|G4VI97|G4VI97_SCHMA Kinesin-like protein OS=Schistosoma mansoni GN=Smp_149260 PE=3 SV=1	9	50.468	-0.820314	18.9923	19.3152	19.6614	19.323	20.1712	20.3042	19.9545	20.1433
G4VI98	tr|G4VI98|G4VI98_SCHMA Putative synaptotagmin OS=Schistosoma mansoni GN=Smp_050630 PE=4 SV=1	1	41.491	0.278809		16.4455	16.6542	16.5499	15.5955	15.6388	17.5788	16.271
G4VI99	tr|G4VI99|G4VI99_SCHMA Glut4 vesicle protein-related OS=Schistosoma mansoni GN=Smp_050640 PE=4 SV=1	2	35.681	-0.503033			16.187	16.187	16.9793	15.5674	17.5235	16.69
G4VIA2	tr|G4VIA2|G4VIA2_SCHMA Uncharacterized protein OS=Schistosoma mansoni GN=Smp_149290 PE=4 SV=1	1	17.852	-0.0685538	22.9344	22.6495	22.341	22.6416	22.7155	22.8395	22.5756	22.7102
G4VIA3	tr|G4VIA3|G4VIA3_SCHMA Putative phosphatidylethanolamine-binding protein OS=Schistosoma mansoni GN=Smp_050700 PE=4 SV=1	10	54.119	0.936532	19.7603	19.0239	19.3977	19.394	18.4541	18.686	18.2324	18.4575
G4VIA5	tr|G4VIA5|G4VIA5_SCHMA Uncharacterized protein OS=Schistosoma mansoni GN=Smp_050730 PE=4 SV=1	9	106.77	-0.282051	18.6214	18.7666	19.5725	18.9869	19.1216	19.5668	19.1183	19.2689
G4VIB2	tr|G4VIB2|G4VIB2_SCHMA Putative replication factor C / DNA polymerase III gamma-tau subunit OS=Schistosoma mansoni GN=Smp_050820 PE=4 SV=1	10	40.684	0.770667	20.4539	20.5489	20.4274	20.4767	20.1646	19.5023	19.4514	19.7061
G4VIB5	tr|G4VIB5|G4VIB5_SCHMA Phosphatidylinositol transfer protein OS=Schistosoma mansoni GN=Smp_137020 PE=4 SV=1	6	35.72	-0.107941	18.2926	17.8598	17.9993	18.0506	17.8375	18.7382	17.8998	18.1585
G4VIB9	tr|G4VIB9|G4VIB9_SCHMA NADH dehydrogenase [ubiquinone] 1 alpha subcomplex subunit 8 OS=Schistosoma mansoni GN=Smp_027480 PE=3 SV=1	8	20.686	0.213187	20.7063	20.8572	19.9997	20.5211	20.5434	20.4572	19.923	20.3079
G4VIC3;G4VIC4	tr|G4VIC3|G4VIC3_SCHMA Uncharacterized protein OS=Schistosoma mansoni GN=Smp_137070.2 PE=4 SV=1;tr|G4VIC4|G4VIC4_SCHMA Uncharacterized protein OS=Schistosoma mansoni GN=Smp_137070.1 PE=4 SV=1	8	74.721	1.52758	19.4326	18.7947	19.1111	19.1128	17.8102	17.8532	17.0924	17.5853
G4VIC7;G4VIC8	tr|G4VIC7|G4VIC7_SCHMA Putative RNA-binding protein OS=Schistosoma mansoni GN=Smp_027550.2 PE=4 SV=1;tr|G4VIC8|G4VIC8_SCHMA Putative RNA-binding protein OS=Schistosoma mansoni GN=Smp_027550.1 PE=4 SV=1	15	73.562	-2.06889	14.5233	17.2685	15.7323	15.8414	17.2939		18.5266	17.9103
G4VIC9	tr|G4VIC9|G4VIC9_SCHMA Uncharacterized protein OS=Schistosoma mansoni GN=Smp_050570 PE=4 SV=1	3	15.478	0.691495	19.863	19.9485	19.5772	19.7963	19.3875	19.0321	18.8946	19.1048
G4VID8	tr|G4VID8|G4VID8_SCHMA Calcium-transporting ATPase OS=Schistosoma mansoni GN=Smp_137170 PE=3 SV=1	16	133.57	-3.05782		15.2351	15.6543	15.4447	18.5813	18.3454	18.5808	18.5025
G4VIE1	tr|G4VIE1|G4VIE1_SCHMA Rab-gap/tbc-related OS=Schistosoma mansoni GN=Smp_126860 PE=4 SV=1	3	32.549	3.34642	18.2526	16.5896	15.94	16.9274	13.581			13.581
G4VIE6	tr|G4VIE6|G4VIE6_SCHMA Phospholipid scramblase OS=Schistosoma mansoni GN=Smp_008860 PE=3 SV=1	2	18.822	-3.42256	15.5662			15.5662	19.2286	19.0282	18.7095	18.9888
G4VIE9	tr|G4VIE9|G4VIE9_SCHMA Putative eukaryotic translation initiation factor 4 gamma OS=Schistosoma mansoni GN=Smp_008900 PE=4 SV=1	4	107.7	0.328663	15.3256	15.6358	13.9295	14.9636	14.6386	14.5711	14.6951	14.6349
G4VIF4	tr|G4VIF4|G4VIF4_SCHMA Putative wd-repeat protein OS=Schistosoma mansoni GN=Smp_126910 PE=4 SV=1	5	104.02	F only	15.5203	15.7246	17.5727	16.2725				N/A
G4VIG2;A9NI59	tr|G4VIG2|G4VIG2_SCHMA Putative 26s protease regulatory subunit OS=Schistosoma mansoni GN=Smp_119310 PE=3 SV=1;tr|A9NI59|A9NI59_SCHMA 26S proteasome subunit RPT6 (Fragment) OS=Schistosoma mansoni GN=RPT6 PE=2 SV=1	26	48.531	0.453421	22.7581	22.5872	22.3901	22.5784	22.1712	22.5157	21.6882	22.125
G4VIG3	tr|G4VIG3|G4VIG3_SCHMA Ribonucleoside-diphosphate reductase OS=Schistosoma mansoni GN=Smp_009030 PE=3 SV=1	26	94.93	-0.140631	21.3113	21.244	21.5038	21.353	21.4492	21.4857	21.5461	21.4936
G4VIH8	tr|G4VIH8|G4VIH8_SCHMA Putative dna repair protein RAD50 OS=Schistosoma mansoni GN=Smp_127050 PE=4 SV=1	7	148.08	-0.539881	14.2985	15.4248	15.9568	15.2267		16.5378	14.9954	15.7666
G4VIH9	tr|G4VIH9|G4VIH9_SCHMA Putative helicase OS=Schistosoma mansoni GN=Smp_008830 PE=3 SV=1	32	117.36	-0.24753	19.384	19.7981	19.995	19.7257	19.991	19.6764	20.2523	19.9732
G4VII3;G4VII2	tr|G4VII3|G4VII3_SCHMA Putative rna binding protein OS=Schistosoma mansoni GN=Smp_126850.1 PE=4 SV=1;tr|G4VII2|G4VII2_SCHMA Putative rna binding protein OS=Schistosoma mansoni GN=Smp_126850.2 PE=4 SV=1	11	95.395	-0.117168	17.7702	18.2338	17.5145	17.8395	17.9346	18.0484	17.887	17.9567
G4VII4	tr|G4VII4|G4VII4_SCHMA Putative mitochondrial 28S ribosomal protein S32 (S32mt) (MRP-S32) OS=Schistosoma mansoni GN=Smp_008770 PE=4 SV=1	4	14.707	0.59215	20.3762	19.7438	20.0775	20.0658	19.534	19.6465	19.2406	19.4737
G4VIJ1;G4VIJ0	tr|G4VIJ1|G4VIJ1_SCHMA Putative gelsolin OS=Schistosoma mansoni GN=Smp_008660.1 PE=4 SV=1;tr|G4VIJ0|G4VIJ0_SCHMA Putative gelsolin OS=Schistosoma mansoni GN=Smp_008660.2 PE=4 SV=1	28	41.709	0.601642	23.9209	23.9945	23.9022	23.9392	23.5294	23.4394	23.0438	23.3375
G4VIK3	tr|G4VIK3|G4VIK3_SCHMA Putative mitochondrial import inner membrane translocase subunit tim44 OS=Schistosoma mansoni GN=Smp_158380 PE=4 SV=1	15	47.356	1.51696	21.6022	21.4006	21.3231	21.442	19.8946	20.2674	19.6131	19.925
G4VIK7	tr|G4VIK7|G4VIK7_SCHMA Putative hsp70 binding protein hspbp OS=Schistosoma mansoni GN=Smp_066950 PE=4 SV=1	9	34.542	-0.775445	19.6793	20.5247	19.4023	19.8688	20.6818	20.6768	20.5741	20.6442
G4VIK8	tr|G4VIK8|G4VIK8_SCHMA 60S ribosomal protein L29 OS=Schistosoma mansoni GN=Smp_066940 PE=3 SV=1	1	8.0953	1.25715	23.9541	23.6649	23.612	23.7437	22.827	22.5309	22.1016	22.4865
G4VIL3	tr|G4VIL3|G4VIL3_SCHMA Putative 40s ribosomal protein S10 OS=Schistosoma mansoni GN=Smp_066890 PE=4 SV=1	6	17.761	1.19009	26.6236	26.4764	26.1713	26.4238	25.1907	25.352	25.1584	25.2337
G4VIM8;G4VIM9	tr|G4VIM8|G4VIM8_SCHMA RuvB-like helicase OS=Schistosoma mansoni GN=Smp_064050.2 PE=3 SV=1;tr|G4VIM9|G4VIM9_SCHMA RuvB-like helicase OS=Schistosoma mansoni GN=Smp_064050.1 PE=3 SV=1	23	50.286	0.465996	23.192	23.1263	23.0281	23.1155	22.5583	22.9906	22.3996	22.6495
G4VIN0;G4VIN1	tr|G4VIN0|G4VIN0_SCHMA Cell polarity protein OS=Schistosoma mansoni GN=Smp_064040.2 PE=4 SV=1;tr|G4VIN1|G4VIN1_SCHMA Cell polarity protein OS=Schistosoma mansoni GN=Smp_064040.1 PE=3 SV=1	3	40.153	0.313341	16.8136	16.0422	14.9466	15.9341	14.8943	16.1596	15.8085	15.6208
G4VIN4;G4VIN6;G4VIN5;G4VIN3	tr|G4VIN4|G4VIN4_SCHMA Uncharacterized protein OS=Schistosoma mansoni GN=Smp_064020.5 PE=4 SV=1;tr|G4VIN6|G4VIN6_SCHMA Uncharacterized protein OS=Schistosoma mansoni GN=Smp_064020.2 PE=4 SV=1;tr|G4VIN5|G4VIN5_SCHMA Uncharacterized protein OS=Schistosoma ma	4	74.848	-0.430304	15.1375	15.2654	15.2185	15.2071	15.3257	15.2514	16.3352	15.6374
G4VIP0;G4VIN9	tr|G4VIP0|G4VIP0_SCHMA Putative cyclophilin-like protein OS=Schistosoma mansoni GN=Smp_069160.2 PE=4 SV=1;tr|G4VIN9|G4VIN9_SCHMA Putative peptidyl-prolyl cis-trans isomerase G, ppig OS=Schistosoma mansoni GN=Smp_069160.1 PE=4 SV=1	13	135.69	-0.755264	15.3599	15.9485	16.0891	15.7992	16.4484	13.7732	19.4418	16.5545
G4VIP2	tr|G4VIP2|G4VIP2_SCHMA Uncharacterized protein OS=Schistosoma mansoni GN=Smp_159690 PE=4 SV=1	7	72.095	0.110886		17.5848	18.2572	17.921	18.0617	17.631	17.7377	17.8102
G4VIQ1;G4VIQ0	tr|G4VIQ1|G4VIQ1_SCHMA Putative mannosyl-oligosaccharide glucosidase OS=Schistosoma mansoni GN=Smp_024580.2 PE=4 SV=1;tr|G4VIQ0|G4VIQ0_SCHMA Putative mannosyl-oligosaccharide glucosidase OS=Schistosoma mansoni GN=Smp_024580.1 PE=4 SV=1	10	103.12	-1.3685			13.4584	13.4584	12.9975	13.6067	17.8766	14.8269
G4VIQ2	tr|G4VIQ2|G4VIQ2_SCHMA Putative signal recognition particle 19 kD protein OS=Schistosoma mansoni GN=Smp_024590 PE=4 SV=1	4	17.191	0.246666	17.5978	17.9936	16.2131	17.2681	15.7535	16.8764	18.4346	17.0215
G4VIQ4	tr|G4VIQ4|G4VIQ4_SCHMA Phosphodiesterase OS=Schistosoma mansoni GN=Smp_135500 PE=3 SV=1	6	100.82	M only				N/A	16.2106	14.9712	15.2235	15.4685
G4VIQ8;T1VYA5	tr|G4VIQ8|G4VIQ8_SCHMA Putative chromatin regulatory protein sir2 OS=Schistosoma mansoni GN=Smp_024670 PE=4 SV=1;tr|T1VYA5|T1VYA5_SCHMA Sirtuin 7 OS=Schistosoma mansoni GN=Sirt7 PE=2 SV=1	4	59.517	-0.368604		15.5554	16.0036	15.7795	16.2265	15.9756	16.2423	16.1481
G4VIS4;G4VIS3	tr|G4VIS4|G4VIS4_SCHMA Uncharacterized protein OS=Schistosoma mansoni GN=Smp_024780.2 PE=4 SV=1;tr|G4VIS3|G4VIS3_SCHMA Uncharacterized protein OS=Schistosoma mansoni GN=Smp_024780.1 PE=4 SV=1	7	163.88	1.10575	16.8531	17.1911	17.1756	17.0733	16.7874	14.9971	16.1181	15.9675
G4VIW3	tr|G4VIW3|G4VIW3_SCHMA Uncharacterized protein OS=Schistosoma mansoni GN=Smp_043070 PE=4 SV=1	6	39.173	2.19162	19.0663	18.9218	18.1399	18.7093	17.7487	15.6405	16.164	16.5177
G4VIW7	tr|G4VIW7|G4VIW7_SCHMA Putative heterogeneous nuclear ribonucleoprotein OS=Schistosoma mansoni GN=Smp_043100 PE=4 SV=1	9	28.65	0.730693	23.5301	23.2289	22.8796	23.2129	22.7256	22.6651	22.0559	22.4822
G4VIW9	tr|G4VIW9|G4VIW9_SCHMA Putative universal stress protein OS=Schistosoma mansoni GN=Smp_043120 PE=4 SV=1	7	17.97	0.312366	25.0037	25.1866	24.8494	25.0132	24.6478	24.4967	24.9581	24.7009
G4VIX0	tr|G4VIX0|G4VIX0_SCHMA Uncharacterized protein Smp_202690 OS=Schistosoma mansoni GN=Smp_202690 PE=4 SV=1	6	15.25	1.63184	24.6047	24.321	24.11	24.3452	22.864	22.2439	23.0323	22.7134
G4VIX3	tr|G4VIX3|G4VIX3_SCHMA Rna-binding protein related OS=Schistosoma mansoni GN=Smp_145490 PE=4 SV=1	6	33.884	F only	20.5578	20.6505	19.4827	20.2303				N/A
G4VIX4	tr|G4VIX4|G4VIX4_SCHMA Putative transforming acidic coiled-coil containing protein 1/2 OS=Schistosoma mansoni GN=Smp_043170 PE=4 SV=1	6	49.12	0.0843849	18.8422	18.3725	18.4663	18.5603	18.9227	18.9186	17.5866	18.4759
G4VIX6	tr|G4VIX6|G4VIX6_SCHMA Putative serine/threonine-protein kinase rio2 (Rio kinase 2) OS=Schistosoma mansoni GN=Smp_043200 PE=4 SV=1	4	56.68	F only	16.7857	15.5827	17.1335	16.5007				N/A
G4VIY9	tr|G4VIY9|G4VIY9_SCHMA UDP-n-acetylglucosamine pyrophosphorylase OS=Schistosoma mansoni GN=Smp_043350 PE=4 SV=1	7	55.297	-0.372485	18.4863	18.9803	18.6649	18.7105	19.1956	19.2629	18.7905	19.083
G4VIZ2	tr|G4VIZ2|G4VIZ2_SCHMA Uncharacterized protein OS=Schistosoma mansoni GN=Smp_053700 PE=4 SV=1	2	9.1987	-0.126033	20.355	20.5473	20.6914	20.5312	20.7031	20.2464	21.0223	20.6573
G4VIZ9	tr|G4VIZ9|G4VIZ9_SCHMA Seryl-tRNA synthetase OS=Schistosoma mansoni GN=Smp_053610 PE=4 SV=1	29	70.651	0.679681	22.0096	22.2183	22.6676	22.2985	21.4711	20.5434	22.842	21.6188
G4VJ03;G4VJ02	tr|G4VJ03|G4VJ03_SCHMA Uncharacterized protein OS=Schistosoma mansoni GN=Smp_150840.1 PE=4 SV=1;tr|G4VJ02|G4VJ02_SCHMA Uncharacterized protein OS=Schistosoma mansoni GN=Smp_150840.2 PE=4 SV=1	12	41.429	1.34648	20.9245	20.853	20.9042	20.8939	19.8887	19.6995	19.0542	19.5474
G4VJ06	tr|G4VJ06|G4VJ06_SCHMA Serine/threonine kinase OS=Schistosoma mansoni GN=Smp_053560 PE=3 SV=1	2	40.984	0.988537	17.3606	17.049	16.9796	17.1297	16.1108	16.2696	16.0432	16.1412
G4VJ08	tr|G4VJ08|G4VJ08_SCHMA Acyl-CoA thioesterase-related OS=Schistosoma mansoni GN=Smp_150820 PE=4 SV=1	8	52.882	-0.34415	19.8952	19.789	19.5631	19.7491	20.2082	20.2893	19.7823	20.0933
G4VJ11;G4VJ12	tr|G4VJ11|G4VJ11_SCHMA Putative aspartyl-tRNA synthetase OS=Schistosoma mansoni GN=Smp_053510.1 PE=3 SV=1;tr|G4VJ12|G4VJ12_SCHMA Putative aspartyl-tRNA synthetase OS=Schistosoma mansoni GN=Smp_053510.2 PE=4 SV=1	23	60.14	0.201601	22.1306	22.258	22.2935	22.2274	22.0355	22.195	21.8468	22.0258
G4VJ20	tr|G4VJ20|G4VJ20_SCHMA Protein kinase OS=Schistosoma mansoni GN=Smp_153870 PE=4 SV=1	2	218.86	0.134031	14.0748	13.489		13.7819	13.2185	14.4389	13.2861	13.6478
G4VJ21	tr|G4VJ21|G4VJ21_SCHMA Meiotic nuclear division protein 1 homolog OS=Schistosoma mansoni GN=Smp_058990 PE=3 SV=1	4	24.276	-0.832702	18.9613	17.8772	17.7751	18.2045	18.8832	18.8781	19.3504	19.0372
G4VJ23;G4VJ22	tr|G4VJ23|G4VJ23_SCHMA Putative oxysterol-binding protein 1 OS=Schistosoma mansoni GN=Smp_058980.2 PE=4 SV=1;tr|G4VJ22|G4VJ22_SCHMA Putative oxysterol-binding protein 1 OS=Schistosoma mansoni GN=Smp_058980.1 PE=4 SV=1	15	100.02	1.41315	18.7936	19.4539	19.3534	19.2003	17.9104	16.288	19.1631	17.7872
G4VJ30	tr|G4VJ30|G4VJ30_SCHMA Uncharacterized protein OS=Schistosoma mansoni GN=Smp_058880 PE=4 SV=1	3	26.48	0.0914034	19.0785	18.973	18.3903	18.8139	18.5328	18.9846	18.6501	18.7225
G4VJ31	tr|G4VJ31|G4VJ31_SCHMA Putative l-asparaginase I OS=Schistosoma mansoni GN=Smp_153810 PE=4 SV=1	3	74.022	-2.67189			14.8453	14.8453	17.8012	17.6067	17.1436	17.5172
G4VJ34	tr|G4VJ34|G4VJ34_SCHMA Putative camp-dependent protein kinase regulatory subunit OS=Schistosoma mansoni GN=Smp_059090 PE=4 SV=1	2	22.709	M only				N/A	18.2519	18.4165	17.7475	18.1386
G4VJ43	tr|G4VJ43|G4VJ43_SCHMA MICOS complex subunit MIC60 OS=Schistosoma mansoni GN=Smp_059150 PE=3 SV=1	20	85.58	0.871985	20.5579	20.6105	20.6706	20.613	19.7362	19.9949	19.4919	19.741
G4VJ55	tr|G4VJ55|G4VJ55_SCHMA Uncharacterized protein OS=Schistosoma mansoni GN=Smp_153990 PE=4 SV=1	10	68.697	0.348555	20.4377	20.4055	20.1303	20.3245	20.1249	19.8242	19.9787	19.9759
G4VJ59	tr|G4VJ59|G4VJ59_SCHMA Uncharacterized protein OS=Schistosoma mansoni GN=Smp_007970 PE=4 SV=1	9	36.328	0.812804	20.9589	20.7205	20.4897	20.723	19.8807	19.985	19.8649	19.9102
G4VJ60	tr|G4VJ60|G4VJ60_SCHMA Putative 4-hydroxyphenylpyruvate dioxygenase OS=Schistosoma mansoni GN=Smp_007960 PE=4 SV=1	5	38.923	-0.408571	17.163	16.9736	18.201	17.4459	17.8341	17.3225	18.4067	17.8545
G4VJ64	tr|G4VJ64|G4VJ64_SCHMA Uncharacterized protein OS=Schistosoma mansoni GN=Smp_160680 PE=4 SV=1	2	179.8	0.375568	16.8067	16.6001	16.4769	16.6279	16.4145	15.9163	16.4261	16.2523
G4VJ70	tr|G4VJ70|G4VJ70_SCHMA Uncharacterized protein OS=Schistosoma mansoni GN=Smp_048690 PE=4 SV=1	1	17.508	M only				N/A	17.3546	18.0662	16.9826	17.4678
G4VJ72	tr|G4VJ72|G4VJ72_SCHMA Xaa-Pro dipeptidase (M24 family) OS=Schistosoma mansoni GN=Smp_090800 PE=3 SV=1	9	49.086	-2.52385	16.7115	17.5695	18.4835	17.5882	19.9945	20.0475	20.2941	20.112
G4VJ73	tr|G4VJ73|G4VJ73_SCHMA Putative xaa-pro dipeptidase pepd/pepq OS=Schistosoma mansoni GN=Smp_114900 PE=4 SV=1	1	6.1321	-1.2924	18.9486	18.8366	19.2941	19.0265	20.2777	20.4312	20.2477	20.3189
G4VJ74	tr|G4VJ74|G4VJ74_SCHMA CDP-diacylglycerol--glycerol-3-phosphate 3-phosphatidyltransferase OS=Schistosoma mansoni GN=Smp_090820 PE=4 SV=1	4	38.697	-0.609771	15.7085	15.9047	15.9445	15.8525	14.952		17.9726	16.4623
G4VJ77	tr|G4VJ77|G4VJ77_SCHMA Uncharacterized protein OS=Schistosoma mansoni GN=Smp_171780 PE=4 SV=1	7	29.12	-0.20898	21.0867	21.2297	21.3984	21.2383	22.281	21.326	20.7347	21.4472
G4VJ79;D5LRV4	tr|G4VJ79|G4VJ79_SCHMA Putative multidrug resistance protein 1 (ATP-binding cassette C1) OS=Schistosoma mansoni GN=Smp_171740 PE=4 SV=1;tr|D5LRV4|D5LRV4_SCHMA Multidrug resistance-associated protein (Fragment) OS=Schistosoma mansoni GN=MRP1 PE=2 SV=1	4	188.89	M only				N/A	14.6927	12.496	13.7098	13.6328
G4VJ82	tr|G4VJ82|G4VJ82_SCHMA Cytoplasmic tRNA 2-thiolation protein 2 OS=Schistosoma mansoni GN=Smp_090690 PE=3 SV=1	1	42.482	F only	15.1522	15.8089	15.9077	15.6229				N/A
G4VJ97	tr|G4VJ97|G4VJ97_SCHMA Putative antolefinin (Antolefinine) OS=Schistosoma mansoni GN=Smp_113630 PE=4 SV=1	4	28.392	-0.962408	17.4146	18.8559	16.6116	17.6273	19.1106	19.1353	17.5233	18.5897
G4VJ99	tr|G4VJ99|G4VJ99_SCHMA Putative heat shock protein OS=Schistosoma mansoni GN=Smp_155740 PE=3 SV=1	20	80.755	0.728731	21.3725	20.9664	21.1966	21.1785	20.6753	20.3946	20.2793	20.4498
G4VJB4	tr|G4VJB4|G4VJB4_SCHMA Putative ribonucleic acid binding protein S1 OS=Schistosoma mansoni GN=Smp_070200 PE=4 SV=1	4	57.767	0.530621	19.5468	19.3509	20.3824	19.7601	19.1424	17.2575	21.2885	19.2295
G4VJC0	tr|G4VJC0|G4VJC0_SCHMA Putative mitochondrial 39S ribosomal protein L45 OS=Schistosoma mansoni GN=Smp_070110 PE=4 SV=1	7	38.27	1.07225	18.162	18.0592	18.8263	18.3492	17.9296	16.2749	17.6263	17.2769
G4VJC6	tr|G4VJC6|G4VJC6_SCHMA Putative rhoptry associated membrane antigen OS=Schistosoma mansoni GN=Smp_070020 PE=4 SV=1	6	97.905	-0.0775833		16.7196		16.7196	17.1217	15.8721	17.3978	16.7972
G4VJC9	tr|G4VJC9|G4VJC9_SCHMA DNA primase OS=Schistosoma mansoni GN=Smp_160190 PE=3 SV=1	10	46.91	0.355547	19.5148	19.6634	19.3758	19.518	18.9138	19.6054	18.9681	19.1624
G4VJD5	tr|G4VJD5|G4VJD5_SCHMA Phosphoglycerate mutase OS=Schistosoma mansoni GN=Smp_096760 PE=3 SV=1	15	28.425	-0.473985	24.6006	24.7296	24.4124	24.5809	25.1665	25.3362	24.6619	25.0549
G4VJD6	tr|G4VJD6|G4VJD6_SCHMA Dihydrofolate reductase OS=Schistosoma mansoni GN=Smp_175230 PE=1 SV=1	5	21.089	0.286242	20.548	20.5627	19.7439	20.2849	20.0096	20.0359	19.9504	19.9986
G4VJD7	tr|G4VJD7|G4VJD7_SCHMA Uncharacterized protein OS=Schistosoma mansoni GN=Smp_096750 PE=3 SV=1	10	17.089	1.45666	25.4935	25.1904	25.1541	25.2793	24.0978	22.7621	24.6082	23.8227
G4VJD9	tr|G4VJD9|G4VJD9_SCHMA Enhancer of rudimentary homolog OS=Schistosoma mansoni GN=Smp_175210 PE=3 SV=1	3	12.028	-0.247737	20.6808	20.9313	20.646	20.7527	20.5789	21.4736	20.9487	21.0004
G4VJE6	tr|G4VJE6|G4VJE6_SCHMA Putative 2-deoxyglucose-6-phosphate phosphatase OS=Schistosoma mansoni GN=Smp_042390 PE=4 SV=1	2	26.892	1.73241	19.0481	18.7069	17.5527	18.4359	17.3	16.4517	16.3587	16.7035
G4VJE7	tr|G4VJE7|G4VJE7_SCHMA Uncharacterized protein OS=Schistosoma mansoni GN=Smp_042400 PE=4 SV=1	8	21.014	-0.721697	23.8646	23.5735	23.2335	23.5572	24.2173	24.4442	24.1752	24.2789
G4VJF0;G4VJF1	tr|G4VJF0|G4VJF0_SCHMA DNA replication complex GINS protein SLD5 OS=Schistosoma mansoni GN=Smp_042430.1 PE=3 SV=1;tr|G4VJF1|G4VJF1_SCHMA DNA replication complex GINS protein SLD5 OS=Schistosoma mansoni GN=Smp_042430.2 PE=3 SV=1	2	25.015	1.14757	18.91	18.7892	18.923	18.8741	17.7755	18.5632	16.8408	17.7265
G4VJF8	tr|G4VJF8|G4VJF8_SCHMA Putative zinc finger protein OS=Schistosoma mansoni GN=Smp_087320 PE=4 SV=1	8	32.264	F only	20.9827	20.6519	20.3292	20.6546				N/A
[truncated: 885 more rows]
