# Supplementary material for: Evolution of gene dosage on the Z-chromosome of schistosome parasites
Source: eLife. 2018 Jul 25;7:e35684. doi: 10.7554/eLife.35684 (PMC6089595; doi:10.7554/eLife.35684)
Supplement: Figure 4—source data 4. [file elife-35684-fig4-data4.xlsx]

## Sheet: Figure 4-source data 4
Figure 4-source data 4: Proteomic data without imputed values - HEADS
Majority protein IDs	Fasta headers	Razor + unique peptides	Mol. Weight [kDa]	log2(FC) without imputation	Log2(iBAQ FH-3)	Log2(iBAQ FH-4)	Log2(iBAQ FH-6-2)	mean Log2(iBAQ F) without imputation	Log2(iBAQ MH-8)	Log2(iBAQ MH-9)	Log2(iBAQ MH-10)	mean Log2(iBAQ M) without imputation
A0A0E3T038;G4VDY5	tr|A0A0E3T038|A0A0E3T038_SCHMA Integrin OS=Schistosoma mansoni GN=alpha-Int4 PE=2 SV=1;tr|G4VDY5|G4VDY5_SCHMA Uncharacterized protein OS=Schistosoma mansoni GN=Smp_173540 PE=3 SV=1	21	167.44	-0.420357	19.8785	19.333	19.3395	19.517	19.9379	19.7154	20.1588	19.9374
A0A0E3X5A0;E7BBC3;G4VIL6	tr|A0A0E3X5A0|A0A0E3X5A0_SCHMA Integrin OS=Schistosoma mansoni GN=alpha-Int3opt PE=2 SV=1;tr|E7BBC3|E7BBC3_SCHMA Alpha integrin receptor 3 OS=Schistosoma mansoni GN=alpha-Int3 PE=2 SV=1;tr|G4VIL6|G4VIL6_SCHMA Putative integrin alpha-ps OS=Schistosoma manso	19	137.62	0.0704544	19.8353	19.7843	18.481	19.3669	19.5766	18.9733	19.3393	19.2964
A0A0R5RJC3;P12812	tr|A0A0R5RJC3|A0A0R5RJC3_SCHMA Hsp20 (Fragment) OS=Schistosoma mansoni PE=2 SV=1;sp|P12812|P40_SCHMA Major egg antigen OS=Schistosoma mansoni PE=2 SV=1	1	39.434	-2.09086	16.26			16.26	18.5997	17.9336	18.5193	18.3508
A0A0R5RJE0;A0A146MG63;G4V9Z0;O96413;G4VCP4;Q6RYS0	tr|A0A0R5RJE0|A0A0R5RJE0_SCHMA Ubiquitin (Fragment) OS=Schistosoma mansoni PE=2 SV=1;tr|A0A146MG63|A0A146MG63_SCHMA Uncharacterized protein OS=Schistosoma mansoni GN=c12516_g1_i1 PE=4 SV=1;tr|G4V9Z0|G4V9Z0_SCHMA Putative ubiquitin (Ribosomal protein L40) O	8	17.111	0.247146	26.1266	26.0637	25.9973	26.0625	25.8167	25.8507	25.7788	25.8154
A0A146MG43	tr|A0A146MG43|A0A146MG43_SCHMA Uncharacterized protein OS=Schistosoma mansoni GN=c18731_g1_i1 PE=4 SV=1	3	9.6581	-1.00777	22.3313	21.6081	21.9106	21.95	22.6919	23.1662	23.0152	22.9578
A0A146MG53	tr|A0A146MG53|A0A146MG53_SCHMA Uncharacterized protein OS=Schistosoma mansoni GN=c15790_g1_i1 PE=4 SV=1	3	18.836	-4.54019			15.7718	15.7718	20.072	20.2298	20.6342	20.312
A0A146MG57	tr|A0A146MG57|A0A146MG57_SCHMA Uncharacterized protein OS=Schistosoma mansoni GN=c12741_g1_i1 PE=4 SV=1	2	9.8203	0.0471231	25.1773	24.8502	24.8016	24.943	24.9538	24.8736	24.8603	24.8959
A0A146MG80	tr|A0A146MG80|A0A146MG80_SCHMA Uncharacterized protein OS=Schistosoma mansoni GN=c8380_g1_i4 PE=4 SV=1	5	5.1138	0.0574633	22.0979	22.2505	22.3841	22.2442	22.1446	22.1136	22.3018	22.1867
A0A146MG93	tr|A0A146MG93|A0A146MG93_SCHMA Uncharacterized protein OS=Schistosoma mansoni GN=c8194_g1_i1 PE=4 SV=1	2	6.815	1.95483	24.2739	23.9518	23.7616	23.9958	22.2686	22.1433	21.711	22.0409
A0A146MG97	tr|A0A146MG97|A0A146MG97_SCHMA Uncharacterized protein OS=Schistosoma mansoni GN=c7392_g1_i1 PE=4 SV=1	3	46.504	-1.04073	15.4159	17.2092	16.0474	16.2242	16.7572	17.4591	17.5784	17.2649
A0A146MGA0	tr|A0A146MGA0|A0A146MGA0_SCHMA Uncharacterized protein OS=Schistosoma mansoni GN=c7489_g1_i1 PE=4 SV=1	6	39.502	0.8381	20.2818	19.9053	19.7072	19.9647	19.1243	19.4102	18.8455	19.1266
A0A146MGA3	tr|A0A146MGA3|A0A146MGA3_SCHMA Uncharacterized protein OS=Schistosoma mansoni GN=c7743_g1_i1 PE=4 SV=1	2	6.2422	1.71385	25.3819	25.1012	24.9965	25.1599	23.5809	23.4609	23.2963	23.446
A0A146MGA5	tr|A0A146MGA5|A0A146MGA5_SCHMA Uncharacterized protein OS=Schistosoma mansoni GN=c6969_g1_i1 PE=4 SV=1	7	42.552	-1.09452	19.4303	19.8171	19.4687	19.572	20.8024	20.6865	20.5108	20.6665
A0A146MGB5	tr|A0A146MGB5|A0A146MGB5_SCHMA Uncharacterized protein OS=Schistosoma mansoni GN=c6438_g1_i1 PE=4 SV=1	4	26.576	-1.10908	18.0257	17.5618	18.1423	17.9099	19.274	18.6735	19.1096	19.019
A0A146MGC1	tr|A0A146MGC1|A0A146MGC1_SCHMA Uncharacterized protein OS=Schistosoma mansoni GN=c6749_g1_i1 PE=4 SV=1	2	13.994	0.493231	20.3792	19.1953	21.1175	20.2307	20.7309	18.8017	19.6797	19.7374
A0A146MGC6	tr|A0A146MGC6|A0A146MGC6_SCHMA Uncharacterized protein OS=Schistosoma mansoni GN=c6091_g2_i1 PE=4 SV=1	2	6.8459	-1.1987	21.4994	21.4571	19.7383	20.8983	22.5995	21.3478	22.3436	22.097
A0A146MGD5	tr|A0A146MGD5|A0A146MGD5_SCHMA Uncharacterized protein OS=Schistosoma mansoni GN=c5016_g1_i1 PE=3 SV=1	2	7.6928	-0.134726	23.0225	22.9842	22.588	22.8649	23.2862	23.1324	22.5802	22.9996
A0A146MGD6	tr|A0A146MGD6|A0A146MGD6_SCHMA Uncharacterized protein OS=Schistosoma mansoni GN=c5482_g1_i1 PE=4 SV=1	1	14.04	-0.322665	18.9227	18.4241	18.0586	18.4684	18.7943	18.976	18.603	18.7911
A0A146MGE6	tr|A0A146MGE6|A0A146MGE6_SCHMA Uncharacterized protein OS=Schistosoma mansoni GN=c4298_g1_i1 PE=4 SV=1	1	7.6088	-0.750475	21.7435	22.0601	21.4139	21.7392	22.4947	22.4638	22.5105	22.4897
A0A146MGF3	tr|A0A146MGF3|A0A146MGF3_SCHMA Uncharacterized protein OS=Schistosoma mansoni GN=c4561_g1_i1 PE=4 SV=1	1	17.239	-0.181907	17.516	18.4078	18.1311	18.0183	18.2017	18.1077	18.2912	18.2002
A0A146MGG9	tr|A0A146MGG9|A0A146MGG9_SCHMA Uncharacterized protein OS=Schistosoma mansoni GN=c2964_g1_i1 PE=4 SV=1	1	10.738	0.63889	18.4604	19.6419	19.5195	19.2073	19.038	17.702	18.9652	18.5684
A0A146MGH8	tr|A0A146MGH8|A0A146MGH8_SCHMA Malic enzyme OS=Schistosoma mansoni GN=c1504_g1_i1 PE=3 SV=1	8	47.963	-0.574345	20.2109	19.8832	20.5239	20.206	20.7697	20.4811	21.0902	20.7803
A0A146MGS0	tr|A0A146MGS0|A0A146MGS0_SCHMA Uncharacterized protein OS=Schistosoma mansoni GN=c6943_g1_i1 PE=3 SV=1	2	14.295	-1.52563	15.5598	17.9785	17.8228	17.1204	18.8365	18.7099	18.3916	18.646
A0A146MGV3	tr|A0A146MGV3|A0A146MGV3_SCHMA Uncharacterized protein OS=Schistosoma mansoni GN=c4946_g1_i1 PE=4 SV=1	1	12.328	-0.280935	18.3283	17.5291		17.9287	18.0944	18.1059	18.4287	18.2096
A0A146MGW2	tr|A0A146MGW2|A0A146MGW2_SCHMA Uncharacterized protein OS=Schistosoma mansoni GN=c3968_g1_i1 PE=4 SV=1	1	40.364	0.0112254	15.9101	16.6517	16.6938	16.4186	16.1301	16.5391	16.5528	16.4073
A0A146MHE5;G4VRK0	tr|A0A146MHE5|A0A146MHE5_SCHMA Protein yippee-like OS=Schistosoma mansoni GN=c18726_g1_i1 PE=3 SV=1;tr|G4VRK0|G4VRK0_SCHMA Putative yippee protein OS=Schistosoma mansoni GN=Smp_171850 PE=4 SV=1	1	13.848	-0.4195	18.2836	18.7709		18.5272	19.0114	18.8915	18.9373	18.9467
A0A146MHL9	tr|A0A146MHL9|A0A146MHL9_SCHMA Uncharacterized protein OS=Schistosoma mansoni GN=c7454_g2_i1 PE=4 SV=1	3	8.4437	0.418217	24.7893	24.6708	24.7417	24.7339	24.2025	24.4204	24.3242	24.3157
A0A146MHS2	tr|A0A146MHS2|A0A146MHS2_SCHMA Uncharacterized protein OS=Schistosoma mansoni GN=c4297_g1_i1 PE=3 SV=1	3	14.625	-0.82593	20.3267	21.197	21.2307	20.9181	21.9243	21.7059	21.602	21.7441
A0A146MHV0;A0A146MGH5	tr|A0A146MHV0|A0A146MHV0_SCHMA MICOS complex subunit MIC10 OS=Schistosoma mansoni GN=c797_g1_i1 PE=3 SV=1;tr|A0A146MGH5|A0A146MGH5_SCHMA MICOS complex subunit MIC10 OS=Schistosoma mansoni GN=c797_g1_i2 PE=3 SV=1	6	9.8944	-0.750536	23.0083	22.6393	22.6427	22.7634	23.6171	23.4851	23.4397	23.514
A0A146MHY2	tr|A0A146MHY2|A0A146MHY2_SCHMA Uncharacterized protein OS=Schistosoma mansoni GN=c19920_g1_i1 PE=4 SV=1	1	17.11	0.198111		17.839	18.6986	18.2688	18.0146	18.0073	18.1903	18.0707
A0A146MI59;A0A146MJ85	tr|A0A146MI59|A0A146MI59_SCHMA Uncharacterized protein OS=Schistosoma mansoni GN=c7360_g1_i1 PE=4 SV=1;tr|A0A146MJ85|A0A146MJ85_SCHMA Uncharacterized protein OS=Schistosoma mansoni GN=c7360_g1_i2 PE=4 SV=1	5	35.707	0.506384	20.0152	20.3181	20.217	20.1834	19.5609	19.3606	20.1095	19.677
A0A146MI72	tr|A0A146MI72|A0A146MI72_SCHMA Uncharacterized protein OS=Schistosoma mansoni GN=c18052_g1_i1 PE=4 SV=1	3	9.4979	-1.79705	17.658	17.8215	18.4558	17.9784	20.1197	19.5439	19.6629	19.7755
A0A146MID7	tr|A0A146MID7|A0A146MID7_SCHMA Uncharacterized protein OS=Schistosoma mansoni GN=c7393_g1_i1 PE=4 SV=1	4	30.885	-0.909869	21.111	21.1838	19.4013	20.5654	21.2395	21.6269	21.5593	21.4752
A0A146MJ29	tr|A0A146MJ29|A0A146MJ29_SCHMA Uncharacterized protein OS=Schistosoma mansoni GN=c5980_g1_i1 PE=4 SV=1	3	26.937	0.491457	20.2212	20.0871	19.7086	20.0056	19.4445	19.3729	19.7251	19.5142
A0A146MJ48;A0A146MII8	tr|A0A146MJ48|A0A146MJ48_SCHMA Uncharacterized protein OS=Schistosoma mansoni GN=c3996_g1_i2 PE=4 SV=1;tr|A0A146MII8|A0A146MII8_SCHMA Uncharacterized protein OS=Schistosoma mansoni GN=c3996_g1_i1 PE=4 SV=1	1	8.643	-1.69097	18.8245			18.8245	20.7353	19.9219	20.8892	20.5155
A0A146MJ81	tr|A0A146MJ81|A0A146MJ81_SCHMA Uncharacterized protein OS=Schistosoma mansoni GN=c325_g1_i1 PE=3 SV=1	1	6.7836	-0.0291496	19.6297	18.6905	18.5679	18.9627	19.0886	18.8951		18.9918
A0A146MJC6	tr|A0A146MJC6|A0A146MJC6_SCHMA Uncharacterized protein OS=Schistosoma mansoni GN=c4805_g2_i1 PE=4 SV=1	4	19.71	-4.24048	16.0405	15.9005	16.4535	16.1315	20.2507	20.4159	20.4494	20.372
A0A146MJD6	tr|A0A146MJD6|A0A146MJD6_SCHMA Uncharacterized protein OS=Schistosoma mansoni GN=c3893_g1_i1 PE=4 SV=1	3	8.95	-1.77428	19.7843	20.0765	19.5011	19.7873	22.6996	19.2913	22.6939	21.5616
A0A1C9A1I5;A0A1C9A1I3;A0A1C9A1J0	tr|A0A1C9A1I5|A0A1C9A1I5_SCHMA MEG-14 isoform 6 OS=Schistosoma mansoni PE=2 SV=1;tr|A0A1C9A1I3|A0A1C9A1I3_SCHMA MEG-14 isoform 4 OS=Schistosoma mansoni PE=2 SV=1;tr|A0A1C9A1J0|A0A1C9A1J0_SCHMA MEG-14 isoform 7 OS=Schistosoma mansoni PE=2 SV=1	2	13.821	-2.07271		16.6294	16.9705	16.7999	19.181	18.7457	18.6912	18.8727
A7UAX6;G4LYG5;A7UAX7	tr|A7UAX6|A7UAX6_SCHMA Ornithine aminotransferase OS=Schistosoma mansoni PE=2 SV=1;tr|G4LYG5|G4LYG5_SCHMA Ornithine--oxo-acid transaminase OS=Schistosoma mansoni GN=Smp_000660 PE=3 SV=1;tr|A7UAX7|A7UAX7_SCHMA Ornithine aminotransferase OS=Schistosoma manso	21	48.65	-0.66223	25.3862	25.4884	25.4366	25.4371	26.0717	26.044	26.1822	26.0993
B2CNV1;G4LXX8	tr|B2CNV1|B2CNV1_SCHMA Stomatin-like protein 2 OS=Schistosoma mansoni GN=StoLP-2 PE=2 SV=1;tr|G4LXX8|G4LXX8_SCHMA SPFH domain / Band 7 family protein, putative OS=Schistosoma mansoni GN=Smp_072640 PE=4 SV=1	8	39.525	-0.572134	21.0438	20.7748	21.0158	20.9448	21.1181	21.8048	21.6279	21.5169
B2D1S3;C4QCZ2;G4VK32	tr|B2D1S3|B2D1S3_SCHMA Nucleotide pyrophosphatase/phosphodiesterase 5 OS=Schistosoma mansoni GN=NPP-5a PE=2 SV=1;tr|C4QCZ2|C4QCZ2_SCHMA Ecto-phosphodiesterase OS=Schistosoma mansoni GN=PDE PE=2 SV=1;tr|G4VK32|G4VK32_SCHMA Putative ectonucleotide pyrophosph	6	51.433	0.638469	20.3764	20.3867	19.7887	20.1839	19.5286	19.5251	19.5828	19.5455
B4XC67	tr|B4XC67|B4XC67_SCHMA Cathepsin L3 OS=Schistosoma mansoni GN=CL3 PE=2 SV=1	6	41.18	-0.871557	18.4118	18.8894	19.0816	18.7943	19.6702	19.3516	19.9757	19.6658
B8Y6H3	tr|B8Y6H3|B8Y6H3_SCHMA DIF_5 OS=Schistosoma mansoni GN=Smp_105220 PE=2 SV=1	6	14.191	0.315654	25.4866	25.5264	25.1159	25.3763	24.9406	25.1305	25.1108	25.0606
C0L926;G4VMQ7	tr|C0L926|C0L926_SCHMA Peptidyl-alpha-hydroxyglycine alpha-amidating lyase OS=Schistosoma mansoni PE=2 SV=1;tr|G4VMQ7|G4VMQ7_SCHMA Putative peptidyl-glycine alpha-amidating monooxygenase OS=Schistosoma mansoni GN=Smp_010820 PE=4 SV=1	4	48.083	0.193527	19.4828	18.891	19.1419	19.1719	18.6896	19.263	18.9825	18.9784
C1LZ83	tr|C1LZ83|C1LZ83_SCHMA Proteasome activator PA28-gamma OS=Schistosoma mansoni GN=PA28-gamma PE=2 SV=1	5	28.688	-0.00681725	20.0275	20.3615	19.787	20.0587	19.7019	20.1729	20.3218	20.0655
C1LZY9	tr|C1LZY9|C1LZY9_SCHMA Serine/threonine-protein phosphatase OS=Schistosoma mansoni GN=Smp_165490 PE=3 SV=2	12	35.756	-0.256131	22.0896	22.139	22.6316	22.2867	22.4975	22.4838	22.6473	22.5429
C1M000	tr|C1M000|C1M000_SCHMA Ebna2 binding protein P100, putative OS=Schistosoma mansoni GN=Smp_081570 PE=4 SV=1	7	58.268	-1.05359	19.7187	18.5647	17.1542	18.4792	19.8579	19.235	19.5055	19.5328
C1M001;C4QTD7	tr|C1M001|C1M001_SCHMA Ebna2 binding protein P100, putative OS=Schistosoma mansoni GN=Smp_166110 PE=4 SV=1;tr|C4QTD7|C4QTD7_SCHMA Uncharacterized protein OS=Schistosoma mansoni GN=Smp_118190 PE=4 SV=2	7	42.178	-0.479013	20.1402	19.4972	18.7154	19.4509	20.485	19.5246	19.7802	19.9299
C1M0Q4	tr|C1M0Q4|C1M0Q4_SCHMA Speckle-type poz protein, putative OS=Schistosoma mansoni GN=Smp_175960 PE=4 SV=2	3	23.415	0.924718	18.2398	19.5253	19.5024	19.0891	17.6964	17.9084	18.8885	18.1644
C1M169	tr|C1M169|C1M169_SCHMA GDP-4-keto-6-deoxy-D-mannose-3, 5-epimerase-4-reductase OS=Schistosoma mansoni GN=GMER PE=2 SV=1	11	35.916	-0.910361	20.1922	20.5904	20.0268	20.2698	21.2341	21.3736	20.9328	21.1802
C4PXA6	tr|C4PXA6|C4PXA6_SCHMA Thymidylate kinase OS=Schistosoma mansoni GN=Smp_001360 PE=4 SV=1	12	25.485	-0.278677	23.2693	23.4811	23.2084	23.3196	23.6086	23.6903	23.4959	23.5983
C4PY08	tr|C4PY08|C4PY08_SCHMA Putative sodium/potassium-dependent atpase beta subunit OS=Schistosoma mansoni GN=Smp_124240 PE=2 SV=1	10	32.92	0.0301481	24.2252	24.1276	23.7612	24.038	23.844	24.0697	24.11	24.0079
C4PY91	tr|C4PY91|C4PY91_SCHMA Rab-2,4,14, putative OS=Schistosoma mansoni GN=Smp_004910 PE=4 SV=1	7	24.767	0.137279	20.7295	20.8863	20.6816	20.7658	20.6897	20.5692	20.6268	20.6285
C4PZS5;C4PZS6	tr|C4PZS5|C4PZS5_SCHMA 60S acidic ribosomal protein P0 OS=Schistosoma mansoni GN=Smp_009690.1 PE=3 SV=1;tr|C4PZS6|C4PZS6_SCHMA 60S acidic ribosomal protein P0 OS=Schistosoma mansoni GN=Smp_009690.2 PE=3 SV=1	11	35.029	-0.36611	21.8972	21.4054	22.4859	21.9295	22.6616	22.19	22.0351	22.2956
C4Q0P6	sp|C4Q0P6|LIS1_SCHMA Lissencephaly-1 homolog OS=Schistosoma mansoni GN=Smp_129340 PE=3 SV=1	9	47.106	0.493606	19.939	20.2364	20.4375	20.2043	19.8523	19.6952	19.5846	19.7107
C4Q195	tr|C4Q195|C4Q195_SCHMA Uncharacterized protein (Fragment) OS=Schistosoma mansoni GN=Smp_130400 PE=4 SV=2	1	21.566	0.973352	19.579	19.0494		19.3142	18.6268	18.2006	18.195	18.3408
C4Q2F2;C4Q2F3	tr|C4Q2F2|C4Q2F2_SCHMA Calcyphosine/tpp, putative OS=Schistosoma mansoni GN=Smp_019640.1 PE=4 SV=1;tr|C4Q2F3|C4Q2F3_SCHMA Calcyphosine/tpp, putative OS=Schistosoma mansoni GN=Smp_019640.2 PE=4 SV=1	7	23.776	0.180834	22.227	22.0781	22.1725	22.1592	21.732	22.2862	21.9169	21.9784
C4Q2F6	tr|C4Q2F6|C4Q2F6_SCHMA Splicing factor u2af large subunit, putative OS=Schistosoma mansoni GN=Smp_019690 PE=4 SV=1	2	57.958	0.507959	14.7132		15.2709	14.992	14.7727	14.0022	14.6773	14.4841
C4Q2F8;C4Q2F9	tr|C4Q2F8|C4Q2F8_SCHMA Uncharacterized protein OS=Schistosoma mansoni GN=Smp_019730.1 PE=4 SV=1;tr|C4Q2F9|C4Q2F9_SCHMA Uncharacterized protein OS=Schistosoma mansoni GN=Smp_019730.2 PE=4 SV=1	4	13.076	0.268713	19.4477	18.52	15.6441	17.8706	18.0027	20.1388	14.664	17.6019
C4Q2I8	tr|C4Q2I8|C4Q2I8_SCHMA Aminoacylase (M20 family) OS=Schistosoma mansoni GN=Smp_019630 PE=4 SV=2	12	48.957	-2.4171	18.7276	19.2536	19.1646	19.0486	21.4982	21.4901	21.4089	21.4657
C4Q309;C4Q308	tr|C4Q309|C4Q309_SCHMA Uncharacterized protein OS=Schistosoma mansoni GN=Smp_021730.1 PE=4 SV=1;tr|C4Q308|C4Q308_SCHMA Uncharacterized protein OS=Schistosoma mansoni GN=Smp_021730.3 PE=4 SV=1	1	25.227	-0.839407	16.0666	16.4212		16.2439	16.9205	17.1685	17.1609	17.0833
C4Q310	tr|C4Q310|C4Q310_SCHMA Uncharacterized protein OS=Schistosoma mansoni GN=Smp_021730.2 PE=4 SV=1	7	25.128	-0.231966	23.2735	23.2871	22.953	23.1712	23.146	23.5502	23.5134	23.4032
C4Q3U7	tr|C4Q3U7|C4Q3U7_SCHMA Protein FAM82B, putative OS=Schistosoma mansoni GN=Smp_024810 PE=4 SV=1	2	21.411	2.13808	20.0856	19.7208	20.1141	19.9735	17.8616	17.8092		17.8354
C4Q3U8	tr|C4Q3U8|C4Q3U8_SCHMA Tetraspanin OS=Schistosoma mansoni GN=Smp_024820.2 PE=3 SV=1	5	25.177	0.672363	22.1431	21.5396	21.5796	21.7541	20.759	21.1522	21.3339	21.0817
C4Q4J8	tr|C4Q4J8|C4Q4J8_SCHMA Phosphatidylinositol transfer protein (Fragment) OS=Schistosoma mansoni GN=Smp_136800 PE=4 SV=2	2	35.473	0.171031	17.994	18.2056	17.8198	18.0065	17.8187	17.8522		17.8354
C4Q4Q6	tr|C4Q4Q6|C4Q4Q6_SCHMA 40S ribosomal protein S3, putative OS=Schistosoma mansoni GN=Smp_027610 PE=3 SV=1	12	25.457	0.323255	21.4617	20.6399	22.238	21.4465	21.8397	20.5307	20.9994	21.1233
C4Q4S4	tr|C4Q4S4|C4Q4S4_SCHMA Synembryn, putative OS=Schistosoma mansoni GN=Smp_027910 PE=4 SV=1	3	60.068	-0.610199	16.9088	13.7036	17.5991	16.0705	16.6807			16.6807
C4Q4V9	tr|C4Q4V9|C4Q4V9_SCHMA Uncharacterized protein OS=Schistosoma mansoni GN=Smp_027870 PE=4 SV=2	5	160.46	-0.4062	14.6218		16.1308	15.3763	15.7316	15.7558	15.86	15.7825
C4Q4W0	tr|C4Q4W0|C4Q4W0_SCHMA Uncharacterized protein OS=Schistosoma mansoni GN=Smp_027880 PE=4 SV=1	3	14.586	-0.275725	20.4677	20.3468	18.5856	19.8001	20.1267	20.3841	19.7166	20.0758
C4Q500	tr|C4Q500|C4Q500_SCHMA Caspase-3 OS=Schistosoma mansoni PE=2 SV=1	8	33.108	-0.688266	20.2065	19.9899	20.743	20.3131	21.1574	20.8887	20.9581	21.0014
C4Q5J0	tr|C4Q5J0|C4Q5J0_SCHMA Camp-dependent protein kinase type I-beta regulatory subunit, putative OS=Schistosoma mansoni GN=Smp_030400 PE=4 SV=2	6	44.456	-2.62751	14.8556	15.224	16.5585	15.546	18.1933	18.4578	17.8696	18.1736
C4Q5J1	tr|C4Q5J1|C4Q5J1_SCHMA Uncharacterized protein OS=Schistosoma mansoni GN=Smp_138600 PE=4 SV=1	16	58.617	-0.291815	20.4134	20.2481	20.1404	20.2673	20.4398	20.8587	20.3788	20.5591
C4Q5J4	tr|C4Q5J4|C4Q5J4_SCHMA Uncharacterized protein OS=Schistosoma mansoni GN=Smp_138620 PE=4 SV=2	2	342.87	-2.50044			12.9118	12.9118	12.9218	16.7284	16.5866	15.4123
C4Q5J8;C4Q5J9;Q5QEI6	tr|C4Q5J8|C4Q5J8_SCHMA Glycerol-3-phosphate dehydrogenase [NAD(+)] OS=Schistosoma mansoni GN=Smp_030500.1 PE=3 SV=1;tr|C4Q5J9|C4Q5J9_SCHMA Glycerol-3-phosphate dehydrogenase [NAD(+)] OS=Schistosoma mansoni GN=Smp_030500.2 PE=3 SV=1;tr|Q5QEI6|Q5QEI6_SCHMA G	21	38.861	-0.771839	23.3566	22.6117	23.8915	23.2866	24.5708	23.7311	23.8734	24.0585
C4Q5M7	tr|C4Q5M7|C4Q5M7_SCHMA Syntaxin, putative OS=Schistosoma mansoni GN=Smp_138840 PE=4 SV=2	3	37.221	-0.666725	17.3475	16.0695	16.1472	16.5214	17.2356	16.8207	17.5081	17.1881
C4Q5Q2	tr|C4Q5Q2|C4Q5Q2_SCHMA Uncharacterized protein OS=Schistosoma mansoni GN=Smp_139120 PE=4 SV=2	3	22.392	3.03431	18.4112	19.6481	20.1239	19.3944	15.4823		17.2379	16.3601
C4Q5U3	tr|C4Q5U3|C4Q5U3_SCHMA Ankyrin 2,3/unc44, putative (Fragment) OS=Schistosoma mansoni GN=Smp_139110 PE=4 SV=2	24	105.7	0.414607	21.8713	21.4416	21.6276	21.6468	21.5302	21.0287	21.1377	21.2322
C4Q5U5	tr|C4Q5U5|C4Q5U5_SCHMA Basigin related OS=Schistosoma mansoni GN=Smp_031880 PE=2 SV=1	8	32.499	0.0935474	23.884	24.3838	24.3333	24.2004	23.7778	23.94	24.6026	24.1068
C4Q5Z1;C4Q5Z2	tr|C4Q5Z1|C4Q5Z1_SCHMA Uncharacterized protein OS=Schistosoma mansoni GN=Smp_031950.2 PE=4 SV=1;tr|C4Q5Z2|C4Q5Z2_SCHMA Uncharacterized protein OS=Schistosoma mansoni GN=Smp_031950.1 PE=4 SV=1	2	24.572	0.667534	18.8383	18.5235	18.1228	18.4949	18.1988	18.2535	17.0298	17.8274
C4Q6M8	tr|C4Q6M8|C4Q6M8_SCHMA Purple acid phosphatase OS=Schistosoma mansoni GN=Smp_140610 PE=3 SV=2	2	53.863	0.438313	17.9904	18.3618	18.7882	18.3801	17.7458	17.9296	18.1499	17.9418
C4Q7T4	tr|C4Q7T4|C4Q7T4_SCHMA Nuclear protein localization, putative OS=Schistosoma mansoni GN=Smp_039180.1 PE=4 SV=1	13	77.432	-0.136206	18.5602	18.9255	18.8294	18.7717	18.934	19.2007	18.589	18.9079
C4Q820;G4VKI3	tr|C4Q820|C4Q820_SCHMA Putative cytochrome C oxidase polypeptide vib OS=Schistosoma mansoni GN=Smp_144000 PE=4 SV=1;tr|G4VKI3|G4VKI3_SCHMA Putative cytochrome C oxidase polypeptide vib OS=Schistosoma mansoni GN=Smp_144010.2 PE=4 SV=1	6	11.456	-0.512086	21.9132	21.2581	20.8851	21.3521	21.8475	22.1766	21.5684	21.8642
C4Q9B4	tr|C4Q9B4|C4Q9B4_SCHMA Dynamin, putative OS=Schistosoma mansoni GN=Smp_044920 PE=3 SV=2	24	92.81	-0.0682564	21.776	21.9305	21.3711	21.6925	21.8188	21.733	21.7305	21.7608
C4QB35	tr|C4QB35|C4QB35_SCHMA Heterogeneous nuclear ribonucleoprotein l (Hnrnp l), putative OS=Schistosoma mansoni GN=Smp_051530 PE=4 SV=1	8	61.346	0.444899	19.9318	19.7869	20.0964	19.9383	19.5223	19.5956	19.3623	19.4934
C4QB42	tr|C4QB42|C4QB42_SCHMA Heterogeneous nuclear ribonucleoprotein l (Hnrnp l), putative OS=Schistosoma mansoni GN=Smp_149700 PE=4 SV=2	1	59.166	-0.115734	15.629	16.0125	15.8855	15.8423	16.1768	15.6617	16.0357	15.9581
C4QBN1;Q9GSS8;G4LXZ8	tr|C4QBN1|C4QBN1_SCHMA Histone H4 OS=Schistosoma mansoni GN=Smp_053300 PE=3 SV=1;tr|Q9GSS8|Q9GSS8_SCHMA Histone H4 (Fragment) OS=Schistosoma mansoni PE=3 SV=1;tr|G4LXZ8|G4LXZ8_SCHMA Histone H4 (Fragment) OS=Schistosoma mansoni GN=Smp_149600 PE=3 SV=1	8	11.367	1.46413	26.9862	25.8146	26.1351	26.3119	25.0868	24.7428	24.7139	24.8478
C4QBX7	tr|C4QBX7|C4QBX7_SCHMA Uncharacterized protein OS=Schistosoma mansoni GN=Smp_151230 PE=4 SV=1	1	8.6766	0.353134	19.7408	19.1896	19.013	19.3145	18.9437	19.094	18.8463	18.9613
C4QCA0;C4QCA1	tr|C4QCA0|C4QCA0_SCHMA Chmp1 (Chromatin modifying protein) (Charged multivesicular body protein), putative OS=Schistosoma mansoni GN=Smp_055880.1 PE=4 SV=2;tr|C4QCA1|C4QCA1_SCHMA Chmp1 (Chromatin modifying protein) (Charged multivesicular body protein), pu	4	25.953	0.0420449	19.262	19.5787	19.7856	19.5421	19.5612	19.2552	19.6838	19.5001
C4QCD2	sp|C4QCD2|PURA_SCHMA Adenylosuccinate synthetase OS=Schistosoma mansoni GN=Smp_055990 PE=3 SV=2	6	46.668	0.337752	20.2804	20.0797	20.2642	20.2081	19.9277	19.4897	20.1936	19.8703
C4QDC5	tr|C4QDC5|C4QDC5_SCHMA Sugar nucleotide epimerase related OS=Schistosoma mansoni GN=Smp_154040 PE=4 SV=2	7	32.511	-0.257323	20.2632	20.4578	20.0827	20.2679	20.3076	20.8604	20.4078	20.5253
C4QDC9	tr|C4QDC9|C4QDC9_SCHMA Derlin OS=Schistosoma mansoni GN=Smp_059350.2 PE=3 SV=1	1	29.056	-0.0754247	18.4431	17.41	17.8536	17.9023	18.302	17.6634	17.9677	17.9777
C4QDY7;C4QDY6	tr|C4QDY7|C4QDY7_SCHMA Nonsense-mediated mRNA decay protein 1 (Rent1),putative OS=Schistosoma mansoni GN=Smp_061590.2 PE=4 SV=1;tr|C4QDY6|C4QDY6_SCHMA Nonsense-mediated mRNA decay protein 1 (Rent1),putative OS=Schistosoma mansoni GN=Smp_061590.1 PE=4 SV=1	5	142.25	0.213263	14.6007	15.512	16.9075	15.6734	15.9901	14.3635	16.0268	15.4601
C4QEK9	tr|C4QEK9|C4QEK9_SCHMA Filamin-related OS=Schistosoma mansoni GN=Smp_156590 PE=4 SV=2	49	179.18	0.885725	22.0056	22.1414	22.0688	22.0719	21.2593	21.0697	21.2296	21.1862
C4QFX9;C4QFY0	tr|C4QFX9|C4QFX9_SCHMA Heat shock protein 70 (Hsp70)-4, putative OS=Schistosoma mansoni GN=Smp_069130.2 PE=3 SV=1;tr|C4QFY0|C4QFY0_SCHMA Heat shock protein 70 (Hsp70)-4, putative OS=Schistosoma mansoni GN=Smp_069130.1 PE=3 SV=1	37	94.463	-0.143326	23.9413	23.8641	23.6407	23.8154	24.0352	23.845	23.9959	23.9587
C4QGD9;C4QGD8	tr|C4QGD9|C4QGD9_SCHMA Subfamily M12B unassigned peptidase (M12 family) OS=Schistosoma mansoni GN=Smp_160620.2 PE=4 SV=2;tr|C4QGD8|C4QGD8_SCHMA Subfamily M12B unassigned peptidase (M12 family) (Fragment) OS=Schistosoma mansoni GN=Smp_160620.1 PE=4 SV=2	2	93.591	0.00254976	16.8583	16.6018	16.0094	16.4898	16.4492		16.5253	16.4873
C4QH88;Q9XY89	tr|C4QH88|C4QH88_SCHMA Annexin OS=Schistosoma mansoni GN=Smp_074150.1 PE=1 SV=1;tr|Q9XY89|Q9XY89_SCHMA Annexin OS=Schistosoma mansoni PE=2 SV=1	25	41.415	-0.847601	23.9543	24.2871	24.204	24.1485	24.7536	25.0281	25.2065	24.9961
C4QIB9	tr|C4QIB9|C4QIB9_SCHMA Uncharacterized protein OS=Schistosoma mansoni GN=Smp_078030.1 PE=4 SV=1	1	16.576	0.437009	19.9427	20.3888	21.92	20.7505	20.6374	20.5513	19.7518	20.3135
C4QIH2	tr|C4QIH2|C4QIH2_SCHMA Lupus la ribonucleoprotein, putative OS=Schistosoma mansoni GN=Smp_164650 PE=4 SV=2	18	42.49	0.381979	22.0573	22.4235	21.9632	22.148	21.6334	21.7729	21.8919	21.766
C4QII1	tr|C4QII1|C4QII1_SCHMA Uncharacterized protein OS=Schistosoma mansoni GN=Smp_164760 PE=4 SV=1	13	134.09	-0.410468	18.3617	17.937	17.4139	17.9042	18.6101	18.1528	18.1812	18.3147
C4QII3	tr|C4QII3|C4QII3_SCHMA Uncharacterized protein OS=Schistosoma mansoni GN=Smp_164780 PE=4 SV=2	1	32.578	-0.647232	14.3017			14.3017	14.7717	15.1177	14.9574	14.9489
C4QJA1	tr|C4QJA1|C4QJA1_SCHMA ATP synthase delta chain, mitochondrial,putative OS=Schistosoma mansoni GN=Smp_082120 PE=3 SV=1	6	17.354	-0.941869	22.6119	22.3347	22.2634	22.4033	23.3547	23.4142	23.2667	23.3452
C4QJA9	tr|C4QJA9|C4QJA9_SCHMA Translation initiation factor 2b, delta subunit,putative OS=Schistosoma mansoni GN=Smp_166550 PE=3 SV=1	4	45.929	-2.06465	15.4729		16.2002	15.8366	18.6204	17.4312	17.6521	17.9012
C4QJB2;Q8MTY0	tr|C4QJB2|C4QJB2_SCHMA NADPH:adrenodoxin oxidoreductase, mitochondrial OS=Schistosoma mansoni GN=Smp_166580 PE=3 SV=1;tr|Q8MTY0|Q8MTY0_SCHMA NADPH:adrenodoxin oxidoreductase, mitochondrial OS=Schistosoma mansoni PE=2 SV=1	2	60.272	-1.32507	18.4984	18.6363	19.9365	19.0237	20.51	20.277	20.2594	20.3488
C4QKQ7	tr|C4QKQ7|C4QKQ7_SCHMA Fascin, putative OS=Schistosoma mansoni GN=Smp_169730 PE=4 SV=1	9	68.956	-0.127801	19.7172	19.6108	19.3055	19.5445	19.6678	19.7177	19.6314	19.6723
C4QKY6	tr|C4QKY6|C4QKY6_SCHMA Spectrin beta chain, brain 4 (Spectrin, non-erythroid beta chain 4) (Beta-V spectrin) (BSPECV),putative OS=Schistosoma mansoni GN=Smp_170310 PE=4 SV=2	21	47.589	-0.337153	24.088	24.0815	24.084	24.0845	24.4414	24.2692	24.5543	24.4216
C4QL66	tr|C4QL66|C4QL66_SCHMA Ubiquitin (Ribosomal protein L40), putative OS=Schistosoma mansoni GN=Smp_089430 PE=4 SV=1	1	14.615	-0.377917	18.157	18.9099	18.5408	18.5359	19.073	18.715	18.9534	18.9138
C4QLP6	tr|C4QLP6|C4QLP6_SCHMA Ubiquitin-fold modifier 1 OS=Schistosoma mansoni GN=Smp_091230 PE=3 SV=1	2	9.1094	-0.0702872	21.4521	20.8004	20.7005	20.9843	21.2872	21.4204	20.4563	21.0546
C4QLY5	tr|C4QLY5|C4QLY5_SCHMA NADH-ubiquinone oxidoreductase mitochondrial, putative OS=Schistosoma mansoni GN=Smp_092570 PE=3 SV=1	11	31.704	-0.481492	21.6666	21.7622	22.2349	21.8879	22.0807	22.5091	22.5183	22.3694
C4QMB3;A9NI53	tr|C4QMB3|C4QMB3_SCHMA 26S protease regulatory subunit, putative OS=Schistosoma mansoni GN=Smp_173840 PE=3 SV=1;tr|A9NI53|A9NI53_SCHMA 26S proteasome subunit ATPase 4 (Fragment) OS=Schistosoma mansoni GN=RPT4 PE=2 SV=1	16	49.181	-0.324954	21.5194	21.3	21.4304	21.4166	21.5595	21.7914	21.8737	21.7415
C4QMH7	tr|C4QMH7|C4QMH7_SCHMA Uncharacterized protein OS=Schistosoma mansoni GN=Smp_095250 PE=4 SV=1	6	20.287	-0.319582	22.3732	21.6773	21.4002	21.8169	22.1677	22.2411	22.0005	22.1364
C4QMI1	tr|C4QMI1|C4QMI1_SCHMA Serine-threonine kinase receptor-associated protein (Strap), putative OS=Schistosoma mansoni GN=Smp_174390 PE=4 SV=2	9	40.101	-0.733256	18.1722	19.3459	18.6631	18.7271	19.1297	19.8851	19.3662	19.4603
C4QMW6	tr|C4QMW6|C4QMW6_SCHMA Uncharacterized protein OS=Schistosoma mansoni GN=Smp_096790 PE=4 SV=2	1	20.919	0.724739	22.7464	22.7365	22.0974	22.5268	22.4667	21.7196	21.2198	21.8021
C4QMW7	tr|C4QMW7|C4QMW7_SCHMA 26S proteasome regulatory subunit rpn2,putative OS=Schistosoma mansoni GN=Smp_175250 PE=4 SV=2	15	107.81	-0.148196	20.1846	19.6909	19.7037	19.8598	20.5143	19.5077	20.0018	20.008
C4QNM9;C4QJB5;C4QHD7	tr|C4QNM9|C4QNM9_SCHMA Histone H3, putative OS=Schistosoma mansoni GN=Smp_177140 PE=3 SV=1;tr|C4QJB5|C4QJB5_SCHMA Histone H3 OS=Schistosoma mansoni GN=Smp_082240 PE=3 SV=1;tr|C4QHD7|C4QHD7_SCHMA Histone H3 OS=Schistosoma mansoni GN=Smp_074610 PE=3 SV=1	1	10.35	1.5305	24.0439	22.958	23.9523	23.6514	22.4106	22.073	21.879	22.1209
C4QNP4	tr|C4QNP4|C4QNP4_SCHMA Cytidylate kinase (Fragment) OS=Schistosoma mansoni GN=Smp_177230 PE=4 SV=2	1	8.3635	-0.843315	19.1678	19.9401	19.2514	19.4531	20.2758	20.4681	20.1453	20.2964
C4QNZ6	tr|C4QNZ6|C4QNZ6_SCHMA Phenylalanyl-tRNA synthetase alpha chain,putative OS=Schistosoma mansoni GN=Smp_101240 PE=4 SV=2	1	26.119	-0.0581921	16.7595			16.7595	16.8374	16.7103	16.9054	16.8177
C4QP14	tr|C4QP14|C4QP14_SCHMA 60S ribosomal protein L7, putative OS=Schistosoma mansoni GN=Smp_101450 PE=4 SV=1	2	29.663	-1.20604	15.9085	15.8768	16.7208	16.1687		16.9531	17.7963	17.3747
C4QP66	tr|C4QP66|C4QP66_SCHMA Uncharacterized protein OS=Schistosoma mansoni GN=Smp_178810 PE=4 SV=1	12	44.263	-0.228029	20.9463	21.1321	21.3989	21.1591	21.474	21.2184	21.4689	21.3871
C4QPK4;C4QPK3	tr|C4QPK4|C4QPK4_SCHMA Eukaryotictranslation initiation factor,putative OS=Schistosoma mansoni GN=Smp_103460.2 PE=4 SV=1;tr|C4QPK3|C4QPK3_SCHMA Eukaryotictranslation initiation factor,putative OS=Schistosoma mansoni GN=Smp_103460.1 PE=4 SV=1	8	31.912	-0.538291	19.9916	19.6431	20.0082	19.881	20.6189	20.2792	20.3597	20.4193
C4QPK6	tr|C4QPK6|C4QPK6_SCHMA Mago nashi protein homolog OS=Schistosoma mansoni GN=Smp_103470.1 PE=4 SV=2	6	16.954	0.273646	20.9347	21.2438	20.4498	20.8761	21.0619	20.8449	19.9006	20.6025
C4QPU0	tr|C4QPU0|C4QPU0_SCHMA Phospholipid-transporting ATPase OS=Schistosoma mansoni GN=Smp_104500 PE=3 SV=1	3	123.32	-0.8036	15.4451	14.8939	16.271	15.5367	15.905		16.7755	16.3403
C4QPU2	tr|C4QPU2|C4QPU2_SCHMA Vacuolar protein sorting-associated, putative OS=Schistosoma mansoni GN=Smp_104520 PE=3 SV=1	3	69.28	-0.0701773	16.5421	16.7225	16.0312	16.432	16.6307	16.1397	16.736	16.5021
C4QPU7;C4QPU5;C4QPU6;C4QPU4	tr|C4QPU7|C4QPU7_SCHMA Phosphoglucomutase, putative OS=Schistosoma mansoni GN=Smp_180530.3 PE=3 SV=2;tr|C4QPU5|C4QPU5_SCHMA Phosphoglucomutase, putative OS=Schistosoma mansoni GN=Smp_180530.2 PE=3 SV=2;tr|C4QPU6|C4QPU6_SCHMA Phosphoglucomutase, putative OS	5	44.212	-0.189584	22.9364	22.7469	22.6212	22.7682	22.8976	23.0457	22.9299	22.9578
C4QPU8	tr|C4QPU8|C4QPU8_SCHMA Phosphoglucomutase, putative OS=Schistosoma mansoni GN=Smp_180530.4 PE=3 SV=2	14	44.898	-0.272417	23.8444	23.7302	23.946	23.8402	24.0445	24.1917	24.1017	24.1126
C4QPU9	tr|C4QPU9|C4QPU9_SCHMA Uncharacterized protein OS=Schistosoma mansoni GN=Smp_180540 PE=4 SV=1	3	30.921	0.198412	18.6962	19.2845	19.5298	19.1702	18.6296	19.305	18.9806	18.9718
C4QQ81;C4QQ82	tr|C4QQ81|C4QQ81_SCHMA NADH-ubiquinone oxidoreductase 39 kD subunit,putative OS=Schistosoma mansoni GN=Smp_106080.1 PE=4 SV=1;tr|C4QQ82|C4QQ82_SCHMA NADH-ubiquinone oxidoreductase 39 kD subunit,putative OS=Schistosoma mansoni GN=Smp_106080.2 PE=4 SV=1	10	37.678	-0.0713051	19.9722	18.8315	20.8418	19.8818	20.2018	20.1559	19.5017	19.9531
C4QRU8	tr|C4QRU8|C4QRU8_SCHMA Uncharacterized protein (Fragment) OS=Schistosoma mansoni GN=Smp_186680 PE=4 SV=1	2	15.139	-0.182625	19.2252	19.5263	19.0551	19.2688	19.408	19.5924	19.354	19.4515
C4QS25	tr|C4QS25|C4QS25_SCHMA Uncharacterized protein OS=Schistosoma mansoni GN=Smp_187350 PE=4 SV=2	6	201.96	-0.300661	18.4046	17.0743	18.3481	17.9423	18.5985	17.9006	18.2299	18.243
C4QT67	tr|C4QT67|C4QT67_SCHMA Uncharacterized protein (Fragment) OS=Schistosoma mansoni GN=Smp_190770 PE=4 SV=2	3	16.85	0.461664	19.7254	19.5682	19.9566	19.7501	19.6656	19.1392	19.0603	19.2884
C4QTZ4;C4QTH5	tr|C4QTZ4|C4QTZ4_SCHMA Tsg101-related (Fragment) OS=Schistosoma mansoni GN=Smp_193270 PE=4 SV=2;tr|C4QTH5|C4QTH5_SCHMA Uncharacterized protein OS=Schistosoma mansoni GN=Smp_191690 PE=4 SV=2	1	7.5955	-0.19185	17.98	18.0614	18.5593	18.2002	17.9381	18.4743	18.7638	18.3921
C4QU02	tr|C4QU02|C4QU02_SCHMA Ribosomal protein S9, putative OS=Schistosoma mansoni GN=Smp_119920 PE=3 SV=1	5	16.859	0.7979	22.7528	22.0737	21.1623	21.9962	21.9107	20.8703	20.8141	21.1983
C4QU53	tr|C4QU53|C4QU53_SCHMA Tsg101-related OS=Schistosoma mansoni GN=Smp_193790 PE=4 SV=1	3	29.008	-1.07836	19.0579	15.7341	18.7454	17.8458	18.3921	19.0959	19.2845	18.9241
C4QU54	tr|C4QU54|C4QU54_SCHMA Spliceosome-associated protein, putative OS=Schistosoma mansoni GN=Smp_120320.1 PE=4 SV=1	2	73.956	2.64571	22.3644	16.0205	16.842	18.409	15.9643		15.5622	15.7632
C7DPD5;G4VSY8	tr|C7DPD5|C7DPD5_SCHMA cAMP-dependent protein kinase catalytic subunit OS=Schistosoma mansoni PE=2 SV=1;tr|G4VSY8|G4VSY8_SCHMA Serine/threonine kinase OS=Schistosoma mansoni GN=Smp_152330 PE=3 SV=1	9	40.434	0.873411	21.7547	21.7146	21.6606	21.71	20.8682	20.7382	20.9032	20.8366
D7R925;A8TKU6;G4VJ94	tr|D7R925|D7R925_SCHMA Alkaline phosphatase OS=Schistosoma mansoni GN=AP PE=2 SV=1;tr|A8TKU6|A8TKU6_SCHMA Alkaline phosphatase OS=Schistosoma mansoni PE=2 SV=1;tr|G4VJ94|G4VJ94_SCHMA Putative alkaline phosphatase OS=Schistosoma mansoni GN=Smp_155890 PE=3 S	14	59.374	1.47733	22.3382	22.9245	22.4647	22.5758	20.7389	21.1594	21.3972	21.0985
E2EAJ1;G4VNM6	tr|E2EAJ1|E2EAJ1_SCHMA GDP-D-mannose-4,6-dehydratase OS=Schistosoma mansoni GN=GMD PE=2 SV=1;tr|G4VNM6|G4VNM6_SCHMA GDP-mannose 4,6-dehydratase OS=Schistosoma mansoni GN=Smp_153490 PE=3 SV=1	8	41.133	0.273666	19.8587	20.058	20.1077	20.0081	19.7562	19.8592	19.5879	19.7345
E7BBC0;G4V5U8	tr|E7BBC0|E7BBC0_SCHMA Integrin beta OS=Schistosoma mansoni GN=beta-Int1 PE=2 SV=1;tr|G4V5U8|G4V5U8_SCHMA Integrin beta OS=Schistosoma mansoni GN=Smp_089700 PE=3 SV=1	20	95.491	-0.302191	20.5972	20.7227	20.6992	20.673	20.8584	20.8825	21.1848	20.9752
E7BBC2;G4V8A1;A0A0E3X4V1	tr|E7BBC2|E7BBC2_SCHMA Alpha integrin receptor 2 OS=Schistosoma mansoni GN=alpha-Int2 PE=2 SV=1;tr|G4V8A1|G4V8A1_SCHMA Putative integrin alpha-ps OS=Schistosoma mansoni GN=Smp_170280 PE=3 SV=1;tr|A0A0E3X4V1|A0A0E3X4V1_SCHMA Integrin OS=Schistosoma mansoni	9	172.45	-2.13073	15.2284	14.1564	15.557	14.9806	17.2732	16.6927	17.3681	17.1113
E7BBH9;G4VLL9	tr|E7BBH9|E7BBH9_SCHMA cGMP-dependent protein kinase 1 OS=Schistosoma mansoni GN=cGK1 PE=2 SV=1;tr|G4VLL9|G4VLL9_SCHMA Serine/threonine kinase OS=Schistosoma mansoni GN=Smp_123290 PE=4 SV=1	17	114.99	0.0787134	19.8202	20.0968	20.1607	20.0259	19.9604	19.7707	20.1104	19.9472
E9LZR7;E9LZR8;G4VT44;G4VT45	tr|E9LZR7|E9LZR7_SCHMA Calmodulin 1 OS=Schistosoma mansoni PE=2 SV=1;tr|E9LZR8|E9LZR8_SCHMA Calmodulin 2 OS=Schistosoma mansoni PE=2 SV=1;tr|G4VT44|G4VT44_SCHMA Putative calmodulin OS=Schistosoma mansoni GN=Smp_026560.2 PE=4 SV=1;tr|G4VT45|G4VT45_SCHMA Put	6	16.807	-0.5894	22.3576	22.6375	22.0924	22.3625	23.1293	23.1582	22.5681	22.9519
G4LUA3	tr|G4LUA3|G4LUA3_SCHMA p25 alpha-related OS=Schistosoma mansoni GN=Smp_097490 PE=4 SV=1	8	19.049	1.55175	23.1621	23.1666	23.0464	23.125	21.4471	21.8747	21.3981	21.5733
G4LUA9;G4LUA8	tr|G4LUA9|G4LUA9_SCHMA Protein RER1 OS=Schistosoma mansoni GN=Smp_019490.4 PE=3 SV=1;tr|G4LUA8|G4LUA8_SCHMA Protein RER1 OS=Schistosoma mansoni GN=Smp_019490.1 PE=3 SV=1	4	21.766	-0.166708	20.9427	20.5655	20.0763	20.5282	20.5944	20.7953	20.695	20.6949
G4LUB6	tr|G4LUB6|G4LUB6_SCHMA Translation factor sui1, putative OS=Schistosoma mansoni GN=Smp_019440 PE=4 SV=1	2	12.49	-0.0727119	20.0534	19.3818	18.9024	19.4458	19.6787	19.7125	19.1644	19.5186
G4LUB7	tr|G4LUB7|G4LUB7_SCHMA Uncharacterized protein OS=Schistosoma mansoni GN=Smp_019430 PE=4 SV=1	6	32.411	-0.789128	18.4226	16.9167	18.9587	18.0993	18.3322	19.2441	19.0891	18.8885
G4LUC1	tr|G4LUC1|G4LUC1_SCHMA Eukariotic translation initiation factor 2b,epsilon subunit, putative OS=Schistosoma mansoni GN=Smp_019380 PE=4 SV=1	5	85.415	-1.86362	15.8042	15.5327	16.777	16.038	17.8058	17.7612	18.1378	17.9016
G4LUC3	tr|G4LUC3|G4LUC3_SCHMA Uncharacterized protein OS=Schistosoma mansoni GN=Smp_019350 PE=4 SV=1	5	14.128	0.232729	25.6246	25.8132	25.2823	25.5734	25.2111	25.3747	25.436	25.3406
G4LUC5	tr|G4LUC5|G4LUC5_SCHMA Fatty acid desaturase, putative OS=Schistosoma mansoni GN=Smp_132740 PE=4 SV=1	3	57.978	-0.775622	14.5089	16.8719	17.683	16.3546	17.175	16.9837	17.2319	17.1302
G4LUC6	tr|G4LUC6|G4LUC6_SCHMA Cytoplasmic dynein light chain, putative OS=Schistosoma mansoni GN=Smp_019310 PE=4 SV=1	5	12.149	3.62789	22.3459	21.9103	21.9046	22.0536	18.4257			18.4257
G4LUC8	tr|G4LUC8|G4LUC8_SCHMA Camp-dependent protein kinase regulatory chain,putative OS=Schistosoma mansoni GN=Smp_019280 PE=4 SV=1	9	40.271	-0.348498	20.8144	21.2161	21.1873	21.0726	21.4675	21.5282	21.2677	21.4211
G4LUD7	tr|G4LUD7|G4LUD7_SCHMA RuvB-like helicase OS=Schistosoma mansoni GN=Smp_132690 PE=3 SV=1	9	51.849	-0.207463	19.9188	19.7084	19.4173	19.6815	19.7346	19.7854	20.1469	19.889
G4LUD9	tr|G4LUD9|G4LUD9_SCHMA Myosin regulatory light chain, putative OS=Schistosoma mansoni GN=Smp_132670.1 PE=4 SV=1	15	22.719	-0.231874	25.9845	25.8143	25.3127	25.7038	25.8375	26.0592	25.9103	25.9357
G4LUE7;G4LUE8	tr|G4LUE7|G4LUE7_SCHMA Transmembrane gtpase mfn (Mitofusin 1) (Fzo homolog), putative OS=Schistosoma mansoni GN=Smp_132620.1 PE=3 SV=1;tr|G4LUE8|G4LUE8_SCHMA Transmembrane gtpase mfn (Mitofusin 1) (Fzo homolog), putative OS=Schistosoma mansoni GN=Smp_13262	3	76.528	-0.0522413		15.7202		15.7202	15.0576	15.3762	16.8835	15.7725
G4LUE9	tr|G4LUE9|G4LUE9_SCHMA Eh domain containing/past-1-related OS=Schistosoma mansoni GN=Smp_019100 PE=3 SV=1	9	62.177	-0.531558	18.2899	18.9469	19.6803	18.9724	19.3428	19.6836	19.4855	19.5039
G4LUF3	tr|G4LUF3|G4LUF3_SCHMA Hyaluronidase, putative OS=Schistosoma mansoni GN=Smp_000020 PE=4 SV=1	6	120.85	0.87343		16.2836		16.2836	15.5602	15.3811	15.2894	15.4102
G4LUF5;G4LUF6;G4LUF4	tr|G4LUF5|G4LUF5_SCHMA 26s proteasome regulatory particle subunit,putative OS=Schistosoma mansoni GN=Smp_000030.2 PE=4 SV=1;tr|G4LUF6|G4LUF6_SCHMA 26s proteasome regulatory particle subunit,putative OS=Schistosoma mansoni GN=Smp_000030.1 PE=4 SV=1;tr|G4LUF	20	106.03	-0.347738	19.9852	19.1662	19.6819	19.6111	20.375	19.5693	19.9322	19.9588
G4LUF7	tr|G4LUF7|G4LUF7_SCHMA Kinesin light chain, putative OS=Schistosoma mansoni GN=Smp_000040 PE=4 SV=1	20	47.158	0.211367	22.9634	22.9445	22.9688	22.9589	22.6662	22.8298	22.7467	22.7475
G4LUG1	tr|G4LUG1|G4LUG1_SCHMA 1-acyl-sn-glycerol-3-phosphate acyltransferase OS=Schistosoma mansoni GN=Smp_000070 PE=3 SV=1	2	29.916	1.41095	16.0898	18.7946	18.8205	17.9017	17.0999	15.858	16.5143	16.4907
G4LUG8	tr|G4LUG8|G4LUG8_SCHMA Uncharacterized protein Smp_010230 OS=Schistosoma mansoni GN=Smp_010230 PE=4 SV=1	10	34.765	0.0536745	25.0309	24.9356	24.7486	24.905	24.7407	24.8367	24.9766	24.8514
G4LUH3	tr|G4LUH3|G4LUH3_SCHMA Uncharacterized protein Smp_127450 OS=Schistosoma mansoni GN=Smp_127450 PE=4 SV=1	2	149.47	-1.03292	16.6346	17.8486	16.6691	17.0508	17.7633	17.7688	18.719	18.0837
G4LUH6	tr|G4LUH6|G4LUH6_SCHMA Uncharacterized protein Smp_127420 OS=Schistosoma mansoni GN=Smp_127420 PE=4 SV=1	2	126.19	-1.72714	19.2267	19.7632	19.0324	19.3408	20.9831	21.1615	21.0593	21.0679
G4LUH9	tr|G4LUH9|G4LUH9_SCHMA Translocon-associated protein, beta subunit (Trap-beta) (Signal sequence receptor beta subunit), putative OS=Schistosoma mansoni GN=Smp_009830 PE=4 SV=1	2	17.259	-0.485094	18.6352	19.5414	19.1276	19.1014	19.437	19.5082	19.8143	19.5865
G4LUI6	tr|G4LUI6|G4LUI6_SCHMA NADH-ubiquinone oxidoreductase fe-s protein 2 (Ndufs2), putative OS=Schistosoma mansoni GN=Smp_127340 PE=3 SV=1	15	76.516	-0.442121	20.8191	20.7005	20.4113	20.6436	20.9506	21.0659	21.2407	21.0857
G4LUI7;G4LUI8	tr|G4LUI7|G4LUI7_SCHMA 14-3-3 protein, putative OS=Schistosoma mansoni GN=Smp_009780.1 PE=3 SV=1;tr|G4LUI8|G4LUI8_SCHMA 14-3-3 protein, putative OS=Schistosoma mansoni GN=Smp_009780.2 PE=3 SV=1	9	28.185	0.182894	24.4986	24.3419	24.5831	24.4745	24.2067	24.3859	24.2823	24.2916
G4LUJ6;G4LUJ7	tr|G4LUJ6|G4LUJ6_SCHMA Proteasome subunit beta type OS=Schistosoma mansoni GN=Smp_121430.2 PE=3 SV=1;tr|G4LUJ7|G4LUJ7_SCHMA Proteasome subunit beta type OS=Schistosoma mansoni GN=Smp_121430.1 PE=3 SV=1	6	23.031	-0.282159	21.5974	22.1336	20.7776	21.5029	21.9037	21.6097	21.8417	21.7851
G4LUK7;G4LUK8	tr|G4LUK7|G4LUK7_SCHMA NADH-ubiquinone oxidoreductase, putative OS=Schistosoma mansoni GN=Smp_038870.2 PE=4 SV=1;tr|G4LUK8|G4LUK8_SCHMA NADH-ubiquinone oxidoreductase, putative OS=Schistosoma mansoni GN=Smp_038870.1 PE=3 SV=1	16	61.804	-0.737458	21.5596	21.1298	21	21.2298	21.9798	21.8456	22.0764	21.9673
G4LUL7	tr|G4LUL7|G4LUL7_SCHMA Uncharacterized protein OS=Schistosoma mansoni GN=Smp_143270 PE=4 SV=1	1	10.815	-0.687556	16.9657		17.4218	17.1937	17.4945	18.0946	18.0548	17.8813
G4LUP0	tr|G4LUP0|G4LUP0_SCHMA 26S proteasome subunit S9, putative OS=Schistosoma mansoni GN=Smp_061650 PE=4 SV=1	12	46.629	-0.309701	20.0643	21.0713	21.0148	20.7168	20.7981	21.1247	21.1568	21.0265
G4LUP4	tr|G4LUP4|G4LUP4_SCHMA Protein farnesyltransferase alpha subunit,putative OS=Schistosoma mansoni GN=Smp_091770 PE=4 SV=1	1	19.931	-0.830862	16.8356	18.0902	18.3215	17.7491	19.1827	17.9773		18.58
G4LUR0	tr|G4LUR0|G4LUR0_SCHMA Serine/threonine protein phosphatase 2a regulatory subunit A, putative OS=Schistosoma mansoni GN=Smp_172280 PE=4 SV=1	16	66.082	0.38724	22.4374	22.4624	20.7921	21.8973	22.6987	20.9311	20.9003	21.51
G4LUR5	tr|G4LUR5|G4LUR5_SCHMA Ubiquitin-specific peptidase 14 (C19 family) OS=Schistosoma mansoni GN=Smp_084740 PE=3 SV=1	7	45.348	1.51594	19.373	19.8961	19.0544	19.4412	18.8528	18.5204	16.4026	17.9253
G4LUS0;P91888	tr|G4LUS0|G4LUS0_SCHMA Calponin OS=Schistosoma mansoni GN=Smp_078690 PE=3 SV=1;tr|P91888|P91888_SCHMA Calponin OS=Schistosoma mansoni PE=2 SV=1	16	38.348	0.140161	24.6374	24.874	24.7304	24.7473	24.4484	24.819	24.5538	24.6071
G4LUS4;G4LUS3	tr|G4LUS4|G4LUS4_SCHMA Uncharacterized protein OS=Schistosoma mansoni GN=Smp_154610.2 PE=4 SV=1;tr|G4LUS3|G4LUS3_SCHMA Uncharacterized protein OS=Schistosoma mansoni GN=Smp_154610.1 PE=4 SV=1	29	85.39	-0.831122	22.0295	22.4521	21.7424	22.0747	22.9059	22.7308	23.0806	22.9058
G4LUT1	tr|G4LUT1|G4LUT1_SCHMA Family S9 non-peptidase homologue (S09 family) OS=Schistosoma mansoni GN=Smp_136690 PE=4 SV=1	3	74.727	-0.795007	16.2883	16.4633	14.3768	15.7095	16.323	16.5162	16.6742	16.5045
G4LUT7	tr|G4LUT7|G4LUT7_SCHMA Peptidase C1 family OS=Schistosoma mansoni GN=Smp_139240 PE=3 SV=1	3	44.321	F only	19.5828	19.5889	19.4163	19.5294				N/A
G4LUV4	tr|G4LUV4|G4LUV4_SCHMA Subfamily C1A non-peptidase homologue (C01 family) OS=Schistosoma mansoni GN=Smp_187140 PE=3 SV=1	2	40.199	F only	19.5097	17.7556	17.5266	18.264				N/A
G4LUW0	tr|G4LUW0|G4LUW0_SCHMA Prohibitin, putative OS=Schistosoma mansoni GN=Smp_075940 PE=4 SV=1	9	23.133	-1.29518	23.4421	22.8044	22.1165	22.7877	23.9641	24.269	24.0154	24.0828
G4LUW3	tr|G4LUW3|G4LUW3_SCHMA Isocitrate dehydrogenase [NADP] OS=Schistosoma mansoni GN=Smp_163050 PE=3 SV=1	14	50.74	-1.0429	20.4775	19.9069	20.3863	20.2569	21.2213	21.2497	21.4284	21.2998
G4LUX9	tr|G4LUX9|G4LUX9_SCHMA Serine/threonine protein phosphatase 2A regulatory subunit OS=Schistosoma mansoni GN=Smp_176600 PE=3 SV=1	3	71.887	0.451093	15.3366	17.0267		16.1816	16.5687	16.5306	14.0923	15.7306
G4LUY9	tr|G4LUY9|G4LUY9_SCHMA Protein transport protein Sec23, putative OS=Schistosoma mansoni GN=Smp_099310 PE=4 SV=1	8	89.307	-0.496486	18.4022	19.0172	18.5281	18.6492	19.089	18.782	19.5659	19.1457
G4LUZ0	tr|G4LUZ0|G4LUZ0_SCHMA Eukaryotic translation initiation factor 3 subunit K OS=Schistosoma mansoni GN=Smp_099320 PE=3 SV=1	7	28.479	-0.594522	20.0984	20.6175	20.4194	20.3785	21.0409	21.0432	20.8348	20.973
G4LV14	tr|G4LV14|G4LV14_SCHMA Sh3-containing grb2-like protein 3 (Endophilin III) OS=Schistosoma mansoni GN=Smp_036990 PE=4 SV=1	9	41.663	0.518708	21.4411	21.7156	22.1289	21.7619	21.1156	21.3789	21.2349	21.2432
G4LV18;Q0JXE6;Q0JXE5;Q0JXE4	tr|G4LV18|G4LV18_SCHMA Uncharacterized protein OS=Schistosoma mansoni GN=Smp_142100 PE=4 SV=1;tr|Q0JXE6|Q0JXE6_SCHMA Transcriptional cofactor CA150 OS=Schistosoma mansoni GN=ca150 PE=2 SV=1;tr|Q0JXE5|Q0JXE5_SCHMA Transcriptional cofactor CA150 OS=Schistoso	12	242.43	-0.0516345	17.9428	18.661	17.8266	18.1434	18.1508	18.1754	18.259	18.1951
G4LV34	tr|G4LV34|G4LV34_SCHMA Camp-dependent protein kinase type II-alpha regulatory subunit, putative OS=Schistosoma mansoni GN=Smp_079010 PE=4 SV=1	16	42.996	-0.0408665	23.6318	24.0197	24.2937	23.9817	23.8677	24.0894	24.1108	24.0226
G4LV40;G4LV41	tr|G4LV40|G4LV40_SCHMA 26S proteasome regulatory subunit S3, putative OS=Schistosoma mansoni GN=Smp_085310.2 PE=4 SV=1;tr|G4LV41|G4LV41_SCHMA 26S proteasome regulatory subunit S3, putative OS=Schistosoma mansoni GN=Smp_085310.1 PE=4 SV=1	16	57.793	-0.0953318	20.3617	20.4236	20.591	20.4588	20.6827	20.3861	20.5936	20.5541
G4LV45;G4LV43;G4LV44	tr|G4LV45|G4LV45_SCHMA Tropomyosin, putative OS=Schistosoma mansoni GN=Smp_085290.3 PE=4 SV=1;tr|G4LV43|G4LV43_SCHMA Tropomyosin, putative OS=Schistosoma mansoni GN=Smp_085290.1 PE=4 SV=1;tr|G4LV44|G4LV44_SCHMA Tropomyosin, putative OS=Schistosoma mansoni	2	23.254	0.97703	19.1566	19.0687	19.1552	19.1268	18.393	17.9066		18.1498
G4LV50	tr|G4LV50|G4LV50_SCHMA SEC23-interacting protein (P125),putative OS=Schistosoma mansoni GN=Smp_197190 PE=4 SV=1	6	121.92	-1.68113	16.658	15.3643	15.2992	15.7738	17.2975	17.5582	17.5092	17.4549
G4LV54	tr|G4LV54|G4LV54_SCHMA Fer-1-related OS=Schistosoma mansoni GN=Smp_141010 PE=4 SV=1	74	219.17	0.0684789	22.732	22.2706	22.7141	22.5722	22.6543	22.2698	22.5872	22.5038
G4LV57;G4LV56	tr|G4LV57|G4LV57_SCHMA Adenylate cyclase type IX, putative OS=Schistosoma mansoni GN=Smp_102340.2 PE=3 SV=1;tr|G4LV56|G4LV56_SCHMA Adenylate cyclase type IX, putative OS=Schistosoma mansoni GN=Smp_102340.1 PE=3 SV=1	4	71.344	-0.324855	15.5675	16.8729	18.8857	17.1087	17.4669		17.4002	17.4336
G4LV68;G4LV69	tr|G4LV68|G4LV68_SCHMA Mitochondrial processing peptidase non-peptidase alpha subunit (M16 family) OS=Schistosoma mansoni GN=Smp_094050.2 PE=3 SV=1;tr|G4LV69|G4LV69_SCHMA Mitochondrial processing peptidase non-peptidase alpha subunit (M16 family) OS=Schist	13	58.766	-0.945438	19.8075	20.5221	20.3023	20.2106	21.0149	21.1935	21.2598	21.1561
G4LV70	tr|G4LV70|G4LV70_SCHMA Phenylalanyl-tRNA synthetase beta chain,putative OS=Schistosoma mansoni GN=Smp_094060 PE=4 SV=1	8	69.519	-1.38771	17.812	17.8185	15.1675	16.9327	18.3377	18.3193	18.3041	18.3204
G4LV74	tr|G4LV74|G4LV74_SCHMA Serine/threonine kinase OS=Schistosoma mansoni GN=Smp_094090 PE=4 SV=1	2	23.424	0.105083			17.0706	17.0706	17.0075	15.8488	18.0403	16.9655
G4LV77	tr|G4LV77|G4LV77_SCHMA Short chain dehydrogenase,putative OS=Schistosoma mansoni GN=Smp_081430 PE=4 SV=1	7	28.511	-1.06978	20.0447	19.6643	19.996	19.9016	21.5501	20.7227	20.6415	20.9714
G4LV80;G4LV81	tr|G4LV80|G4LV80_SCHMA 6-phosphogluconolactonase OS=Schistosoma mansoni GN=Smp_081460.3 PE=4 SV=1;tr|G4LV81|G4LV81_SCHMA 6-phosphogluconolactonase OS=Schistosoma mansoni GN=Smp_081460.1 PE=4 SV=1	7	26.621	-0.0199712	21.4001	21.4692	21.0763	21.3152	21.288	21.4457	21.2717	21.3352
G4LV82	tr|G4LV82|G4LV82_SCHMA Uncharacterized protein OS=Schistosoma mansoni GN=Smp_081470 PE=4 SV=1	2	28.032	1.11478	20.4782	18.7639	18.8933	19.3785	18.6804	18.0722	18.0384	18.2637
G4LV86	tr|G4LV86|G4LV86_SCHMA Striatin, putative OS=Schistosoma mansoni GN=Smp_166080.2 PE=4 SV=1	8	98.462	0.0865744	19.6127	20.291	19.1466	19.6834	19.4328	19.5246	19.8332	19.5968
G4LV90	tr|G4LV90|G4LV90_SCHMA Eukaryotictranslation initiation factor,putative OS=Schistosoma mansoni GN=Smp_176040 PE=4 SV=1	1	95.365	0.112769	16.5189	15.8202	16.1144	16.1511	15.9745	16.376	15.7647	16.0384
G4LV91	tr|G4LV91|G4LV91_SCHMA Uncharacterized protein OS=Schistosoma mansoni GN=Smp_192360 PE=4 SV=1	6	18.913	0.494651	19.5289	19.4951	19.6357	19.5532	19.6453	19.5782	17.9523	19.0586
G4LV92	tr|G4LV92|G4LV92_SCHMA Rab6, putative OS=Schistosoma mansoni GN=Smp_176050 PE=4 SV=1	3	22.437	-0.0593558	19.1694	19.1372	17.9906	18.7658	18.7387	18.9639	18.7728	18.8251
G4LV97;B8Y6H6	tr|G4LV97|G4LV97_SCHMA Uncharacterized protein OS=Schistosoma mansoni GN=Smp_176080 PE=4 SV=1;tr|B8Y6H6|B8Y6H6_SCHMA DIF_8 (Fragment) OS=Schistosoma mansoni PE=2 SV=1	3	33.194	-0.149883	18.5177	18.8598	18.2468	18.5415	18.5259	18.8236	18.7246	18.6913
G4LVB0	tr|G4LVB0|G4LVB0_SCHMA Uncharacterized protein OS=Schistosoma mansoni GN=Smp_033610 PE=4 SV=1	2	13.683	-2.13262	17.7569			17.7569	19.0136	20.4444	20.2104	19.8895
G4LVB4	tr|G4LVB4|G4LVB4_SCHMA Epsin 4/enthoprotin, putative OS=Schistosoma mansoni GN=Smp_140330 PE=4 SV=1	4	65.864	-0.84843		17.2505	14.1061	15.6783	15.715	16.732	17.1332	16.5267
G4LVB6;G4LVC0;G4LVB9;G4LVB8;G4LVB7	tr|G4LVB6|G4LVB6_SCHMA ATP synthase gamma subunit, putative OS=Schistosoma mansoni GN=Smp_033670.5 PE=3 SV=1;tr|G4LVC0|G4LVC0_SCHMA ATP synthase gamma subunit, putative OS=Schistosoma mansoni GN=Smp_033670.4 PE=4 SV=1;tr|G4LVB9|G4LVB9_SCHMA ATP synthase su	11	32.088	-1.11766	22.736	21.9777	22.6636	22.4591	23.5774	23.5133	23.6396	23.5768
G4LVC7;I6TRR3	tr|G4LVC7|G4LVC7_SCHMA DEAD box ATP-dependent RNA helicase, putative OS=Schistosoma mansoni GN=Smp_033710 PE=3 SV=1;tr|I6TRR3|I6TRR3_SCHMA Vasa-like DEAD-box RNA helicase OS=Schistosoma mansoni GN=vlg1 PE=2 SV=1	15	71.08	0.185962	19.7596	19.1946	19.604	19.5194	19.5026	19.396	19.1017	19.3334
G4LVD1;G4LVD2	tr|G4LVD1|G4LVD1_SCHMA Uncharacterized protein OS=Schistosoma mansoni GN=Smp_033760.2 PE=4 SV=1;tr|G4LVD2|G4LVD2_SCHMA Uncharacterized protein OS=Schistosoma mansoni GN=Smp_033760.1 PE=4 SV=1	24	75.25	0.0757081	21.5636	21.607	21.4571	21.5426	21.4803	21.4083	21.5119	21.4669
G4LVE5	tr|G4LVE5|G4LVE5_SCHMA Arginine/serine-rich splicing factor, putative OS=Schistosoma mansoni GN=Smp_185230 PE=4 SV=1	10	23.244	0.323674	23.0257	22.8245	22.1983	22.6828	22.2052	22.449	22.4233	22.3592
G4LVE7	tr|G4LVE7|G4LVE7_SCHMA ATP synthase f chain, mitochondrial-related OS=Schistosoma mansoni GN=Smp_140480 PE=4 SV=1	3	13.079	-1.24724	20.8511	20.884	20.3096	20.6816	21.8885	22.054	21.8439	21.9288
G4LVF8	tr|G4LVF8|G4LVF8_SCHMA Uncharacterized protein OS=Schistosoma mansoni GN=Smp_066610.1 PE=4 SV=1	3	17.971	0.213628	19.1213	19.0397	18.1	18.7537	18.6373	18.7915	18.1914	18.5401
G4LVG1;G4LVG0	tr|G4LVG1|G4LVG1_SCHMA Eukaryotic peptide chain release factor subunit,putative OS=Schistosoma mansoni GN=Smp_066630.1 PE=4 SV=1;tr|G4LVG0|G4LVG0_SCHMA Eukaryotic peptide chain release factor subunit,putative OS=Schistosoma mansoni GN=Smp_066630.2 PE=4 SV=	9	49.598	-0.18287	18.5553	18.909	19.0162	18.8269	19.2131	19.1127	18.7034	19.0097
G4LVG4	tr|G4LVG4|G4LVG4_SCHMA Syntaxin, putative OS=Schistosoma mansoni GN=Smp_066670.1 PE=3 SV=1	2	33.405	-0.515028	17.6701	17.4997	17.3887	17.5195	17.5473	18.6395	17.9167	18.0345
G4LVG5	tr|G4LVG5|G4LVG5_SCHMA Fumarate hydratase OS=Schistosoma mansoni GN=Smp_158240 PE=4 SV=1	2	54.596	1.4319	17.0966	17.3671	16.911	17.1249	15.7402	15.6809	15.6579	15.693
G4LVH2	tr|G4LVH2|G4LVH2_SCHMA DEAD box ATP-dependent RNA helicase, putative OS=Schistosoma mansoni GN=Smp_013790 PE=3 SV=1	7	85.415	1.01114	17.3556	17.8466	18.0481	17.7501	17.1629	16.8269	16.2271	16.739
G4LVH6;G4LVH5	tr|G4LVH6|G4LVH6_SCHMA Non-specific serine/threonine protein kinase OS=Schistosoma mansoni GN=Smp_013840.1 PE=4 SV=1;tr|G4LVH5|G4LVH5_SCHMA Non-specific serine/threonine protein kinase OS=Schistosoma mansoni GN=Smp_013840.2 PE=4 SV=1	4	122.12	-0.342424	17.2007	17.0984	17.0822	17.1271	17.5872	17.306	17.5154	17.4695
G4LVH9	tr|G4LVH9|G4LVH9_SCHMA Glutamate-cysteine ligase OS=Schistosoma mansoni GN=Smp_013860 PE=4 SV=1	11	50.442	-1.19161	20.468	20.6143	20.2371	20.4398	21.873	21.5386	21.4828	21.6314
G4LVI8	tr|G4LVI8|G4LVI8_SCHMA Adenylyl cyclase-associated protein OS=Schistosoma mansoni GN=Smp_014010 PE=3 SV=1	18	52.697	1.05217	22.2035	23.4099	23.2678	22.9604	21.8801	21.8204	22.0241	21.9082
G4LVJ6	tr|G4LVJ6|G4LVJ6_SCHMA DEAD box ATP-dependent RNA helicase, putative OS=Schistosoma mansoni GN=Smp_211330 PE=3 SV=1	4	51.728	1.05127	18.322	17.2582	18.6761	18.0854	17.4491	16.4544	17.1989	17.0341
G4LVJ7	tr|G4LVJ7|G4LVJ7_SCHMA Uncharacterized protein OS=Schistosoma mansoni GN=Smp_210190 PE=4 SV=1	1	8.649	0.159485	21.0515	20.8948	19.9818	20.6427	20.4223	20.8023	20.225	20.4832
G4LVJ9	tr|G4LVJ9|G4LVJ9_SCHMA Uncharacterized protein OS=Schistosoma mansoni GN=Smp_173960 PE=4 SV=1	3	34.554	-0.564103	17.3836	19.1395	17.65	18.0577	18.1058	18.9143	18.8454	18.6218
G4LVK0	tr|G4LVK0|G4LVK0_SCHMA AMP deaminase, putative OS=Schistosoma mansoni GN=Smp_004120 PE=4 SV=1	8	69.341	-1.1866	17.1311	17.5702	16.3871	17.0295	18.5718	18.048	18.0284	18.2161
G4LVL0	tr|G4LVL0|G4LVL0_SCHMA Uncharacterized protein OS=Schistosoma mansoni GN=Smp_002380 PE=4 SV=1	3	30.846	-0.256566	17.6808	18.5016	18.789	18.3238	18.4488	18.8817	18.4107	18.5804
G4LVL4	tr|G4LVL4|G4LVL4_SCHMA Uncharacterized protein OS=Schistosoma mansoni GN=Smp_171520 PE=4 SV=1	1	70.78	0.589007	16.5329	16.0982		16.3155	15.7591	15.6244	15.796	15.7265
G4LVL5	tr|G4LVL5|G4LVL5_SCHMA Beta-parvin-related OS=Schistosoma mansoni GN=Smp_171530 PE=4 SV=1	2	44.084	0.0729204	17.2471	16.3698	16.5838	16.7336	17.2812	17.3357	15.3651	16.6607
G4LVL7;G4LVL8;G4LVL9	tr|G4LVL7|G4LVL7_SCHMA Ribosome-binding protein 1 (Ribosome receptor protein) (MRRp), putative OS=Schistosoma mansoni GN=Smp_171540.3 PE=4 SV=1;tr|G4LVL8|G4LVL8_SCHMA Ribosome-binding protein 1 (Ribosome receptor protein) (MRRp), putative OS=Schistosoma ma	10	86.734	-0.507384	16.782	17.1948	16.9249	16.9672	17.583	17.5505	17.2903	17.4746
G4LVM3	tr|G4LVM3|G4LVM3_SCHMA Ribosomal protein L19 OS=Schistosoma mansoni GN=Smp_171570 PE=3 SV=1	7	99.843	3.36688	17.8859	18.7795	19.0521	18.5725	16.105	14.9881	14.5237	15.2056
G4LVM8	tr|G4LVM8|G4LVM8_SCHMA Host cell factor (DHcf) OS=Schistosoma mansoni GN=Smp_090450 PE=4 SV=1	5	133.82	2.13746	16.1207	16.0625	15.5393	15.9075	13.77			13.77
G4LVM9	tr|G4LVM9|G4LVM9_SCHMA Uncharacterized protein OS=Schistosoma mansoni GN=Smp_122840 PE=4 SV=1	3	48.944	-0.188664	18.0993	17.3993	19.2221	18.2402	18.6803	18.711	17.8953	18.4289
G4LVN0	tr|G4LVN0|G4LVN0_SCHMA Uncharacterized protein OS=Schistosoma mansoni GN=Smp_122830 PE=4 SV=1	4	125.71	-0.753908	16.3906	16.854	16.0356	16.4267	16.8595	17.6697	17.0128	17.1806
G4LVN3	tr|G4LVN3|G4LVN3_SCHMA Gh regulated tbc protein-1, putative OS=Schistosoma mansoni GN=Smp_001420 PE=4 SV=1	2	34.252	-0.972886	17.1198	16.991	18.8322	17.6477	18.6552	18.3874	18.8191	18.6206
G4LVP0;G4LVN9	tr|G4LVP0|G4LVP0_SCHMA Uridine cytidine kinase I, putative OS=Schistosoma mansoni GN=Smp_062260.1 PE=4 SV=1;tr|G4LVN9|G4LVN9_SCHMA Uridine cytidine kinase I, putative OS=Schistosoma mansoni GN=Smp_062260.2 PE=4 SV=1	5	27.768	-0.361155	18.7788	18.9769	18.3791	18.7116	19.3185	18.7905	19.1093	19.0727
G4LVP7	tr|G4LVP7|G4LVP7_SCHMA Uncharacterized protein OS=Schistosoma mansoni GN=Smp_155620 PE=4 SV=1	10	52.46	0.69561	21.4961	21.273	21.0308	21.2666	20.4587	20.4836	20.7707	20.571
G4LVR3	tr|G4LVR3|G4LVR3_SCHMA Ndr family, putative OS=Schistosoma mansoni GN=Smp_000320 PE=4 SV=1	5	24.764	-0.0847592	21.4075	22.1825	22.2649	21.9516	21.9996	22.0404	22.0692	22.0364
G4LVS4	tr|G4LVS4|G4LVS4_SCHMA Saposin containing protein OS=Schistosoma mansoni GN=Smp_000260 PE=4 SV=1	12	104.72	-0.235959	19.6557	19.7854	19.2583	19.5665	19.6312	19.9524	19.8237	19.8024
G4LVS7;G4LVS6	tr|G4LVS7|G4LVS7_SCHMA Fusion OS=Schistosoma mansoni GN=Smp_000240.2 PE=4 SV=1;tr|G4LVS6|G4LVS6_SCHMA RNA binding protein, putative OS=Schistosoma mansoni GN=Smp_000240.1 PE=4 SV=1	5	53.295	-0.527261	19.4888	18.9726	20.2028	19.5547	19.7776	20.2297	20.2386	20.082
G4LVU8	tr|G4LVU8|G4LVU8_SCHMA Filamin OS=Schistosoma mansoni GN=Smp_000100 PE=4 SV=1	100	251.42	-0.135283	24.369	24.2088	24.1122	24.23	24.375	24.3199	24.401	24.3653
G4LVU9	tr|G4LVU9|G4LVU9_SCHMA F-actin capping protein alpha, putative OS=Schistosoma mansoni GN=Smp_118830 PE=3 SV=1	9	33.659	0.209699	21.2828	21.2508	20.984	21.1725	20.9957	20.979	20.9138	20.9628
G4LVV0	tr|G4LVV0|G4LVV0_SCHMA Solute carrier family, putative OS=Schistosoma mansoni GN=Smp_167630 PE=4 SV=1	4	56.292	-0.966413	18.1591	15.4681	16.6963	16.7745	17.7036	16.9089	18.6102	17.7409
G4LVV4;D6BNU5	tr|G4LVV4|G4LVV4_SCHMA PwLAP aminopeptidase (M17 family) OS=Schistosoma mansoni GN=Smp_083870 PE=4 SV=1;tr|D6BNU5|D6BNU5_SCHMA Leucine aminopeptidase 2 OS=Schistosoma mansoni PE=2 SV=1	23	59.706	-0.344323	22.6262	22.7248	23.0039	22.785	23.1688	23.0917	23.1275	23.1293
G4LVX7	tr|G4LVX7|G4LVX7_SCHMA Vacuolar protein sorting (Vps33), putative OS=Schistosoma mansoni GN=Smp_069670 PE=3 SV=1	1	73.425	-0.261354		14.5399	15.4119	14.9759	15.2737	14.9336	15.5043	15.2372
G4LVY0;G4LVX9	tr|G4LVY0|G4LVY0_SCHMA Uncharacterized protein OS=Schistosoma mansoni GN=Smp_160000.1 PE=4 SV=1;tr|G4LVX9|G4LVX9_SCHMA Uncharacterized protein OS=Schistosoma mansoni GN=Smp_160000.2 PE=4 SV=1	2	221.71	-0.61462	14.2378	16.1218	15.81	15.3899	16.7717	15.4947	15.747	16.0045
G4LVY7	tr|G4LVY7|G4LVY7_SCHMA Uncharacterized protein Smp_210610 OS=Schistosoma mansoni GN=Smp_210610 PE=3 SV=1	8	60.138	-0.242665	20.4397	20.2213	20.3365	20.3325	20.5159	20.844	20.3657	20.5752
G4LVZ3	tr|G4LVZ3|G4LVZ3_SCHMA Lamin, putative OS=Schistosoma mansoni GN=Smp_159900.1 PE=4 SV=1	74	744.47	-0.00789343	21.9671	22.0085	21.7845	21.92	21.8672	21.8612	22.0554	21.9279
G4LW08	tr|G4LW08|G4LW08_SCHMA Actin, putative OS=Schistosoma mansoni GN=Smp_072870 PE=3 SV=1	12	42.515	-0.702576	21.2367	22.2381	22.1002	21.8583	22.4237	22.5552	22.7037	22.5609
G4LW12	tr|G4LW12|G4LW12_SCHMA Hsp90 co-chaperone (Tebp), putative OS=Schistosoma mansoni GN=Smp_072900.1 PE=4 SV=1	3	19.778	-0.0020552	23.8094	23.7197	23.9608	23.83	23.7838	24.0203	23.6919	23.832
G4LW34	tr|G4LW34|G4LW34_SCHMA Tubulin beta chain,putative OS=Schistosoma mansoni GN=Smp_030730 PE=3 SV=1	3	46.066	-0.112114	24.2251	23.9762	24.3646	24.1887	24.1457	24.3581	24.3985	24.3008
G4LW37	tr|G4LW37|G4LW37_SCHMA Uncharacterized protein OS=Schistosoma mansoni GN=Smp_138760 PE=4 SV=1	6	29.339	0.311838	21.4016	21.0915	21.1327	21.2086	20.798	21.0498	20.8424	20.8967
G4LW38	tr|G4LW38|G4LW38_SCHMA Elongation factor 1-beta, putative OS=Schistosoma mansoni GN=Smp_030690 PE=3 SV=1	12	23.958	-0.228819	24.3683	24.0839	24.1575	24.2032	24.4921	24.6408	24.1632	24.432
G4LW52;G4LW53	tr|G4LW52|G4LW52_SCHMA Tetraspanin, putative OS=Schistosoma mansoni GN=Smp_059530.2 PE=3 SV=1;tr|G4LW53|G4LW53_SCHMA Tetraspanin, putative OS=Schistosoma mansoni GN=Smp_059530.1 PE=3 SV=1	2	24.707	-0.133202	19.0318	18.2072	19.9885	19.0758	18.8059	19.6272	19.1939	19.209
G4LW56	tr|G4LW56|G4LW56_SCHMA Similar to tetraspanin TE736 OS=Schistosoma mansoni GN=Smp_194960 PE=3 SV=1	2	20.687	0.704363	19.5864	19.7581	19.5341	19.6262	18.5229	19.1525	19.0901	18.9218
G4LW62;G9HW09	tr|G4LW62|G4LW62_SCHMA Uncharacterized protein OS=Schistosoma mansoni GN=Smp_131810 PE=4 SV=1;tr|G9HW09|G9HW09_SCHMA Protein O-fucosyltransferase B OS=Schistosoma mansoni GN=POFucTB PE=2 SV=1	3	63.106	-1.4949	17.2584	14.4287		15.8435	17.8417	16.9913	17.1824	17.3384
G4LW63	tr|G4LW63|G4LW63_SCHMA Protein kinase OS=Schistosoma mansoni GN=Smp_131800 PE=4 SV=1	2	68.84	-0.476385	16.142	16.5764	18.3989	17.0391	17.3368	16.7992	18.4104	17.5155
G4LW67	tr|G4LW67|G4LW67_SCHMA DEAD box ATP-dependent RNA helicase, putative OS=Schistosoma mansoni GN=Smp_131770 PE=4 SV=1	2	92.644	-0.198194	13.9215	13.8314	14.0865	13.9464	13.8513		14.438	14.1446
G4LW68	tr|G4LW68|G4LW68_SCHMA Uncharacterized protein OS=Schistosoma mansoni GN=Smp_017450 PE=4 SV=1	4	38.214	-0.0144448	20.7761	20.0358	19.9552	20.2557	20.5706	20.2808	19.959	20.2701
G4LW75	tr|G4LW75|G4LW75_SCHMA Uncharacterized protein OS=Schistosoma mansoni GN=Smp_075770 PE=4 SV=1	8	29.422	-0.92837	19.7075	20.4653	19.9573	20.0434	20.6669	21.225	21.0234	20.9718
G4LW80	tr|G4LW80|G4LW80_SCHMA Hemoglobinase (C13 family) OS=Schistosoma mansoni GN=Smp_075800 PE=4 SV=1	2	49.094	1.62994	20.5731	21.3684	20.7621	20.9012	19.5267	19.1998	19.0873	19.2713
G4LW91	tr|G4LW91|G4LW91_SCHMA Thimet oligopeptidase (M03 family) OS=Schistosoma mansoni GN=Smp_029500 PE=3 SV=1	31	77.687	-0.227812	22.8573	22.8325	22.4487	22.7128	22.8604	22.9739	22.9876	22.9406
G4LW94	tr|G4LW94|G4LW94_SCHMA Thimet oligopeptidase (M03 family) OS=Schistosoma mansoni GN=Smp_029470 PE=3 SV=1	1	78.268	-1.16797	14.2052		14.1192	14.1622	15.4284	15.4836	15.0786	15.3302
G4LWA6	tr|G4LWA6|G4LWA6_SCHMA Dendritic cell protein, putative OS=Schistosoma mansoni GN=Smp_029410 PE=4 SV=1	4	28.277	-0.0824955	20.0824	20.2996	20.2356	20.2059	20.4632	20.5728	19.829	20.2884
G4LWA8	tr|G4LWA8|G4LWA8_SCHMA ATP synthase subunit beta vacuolar,putative OS=Schistosoma mansoni GN=Smp_029390 PE=3 SV=1	15	54.23	0.310467	22.4863	22.5439	22.8222	22.6175	22.4045	22.1847	22.3318	22.307
G4LWB9;G4LWC0	tr|G4LWB9|G4LWB9_SCHMA Arginine/serine-rich splicing factor, putative OS=Schistosoma mansoni GN=Smp_098890.1 PE=4 SV=1;tr|G4LWC0|G4LWC0_SCHMA Arginine/serine-rich splicing factor, putative OS=Schistosoma mansoni GN=Smp_098890.2 PE=4 SV=1	3	17.553	0.262626	22.3377	22.2952	22.0557	22.2295	21.9774	21.8515	22.0718	21.9669
G4LWC4;G4LWC5	tr|G4LWC4|G4LWC4_SCHMA Mps one binder kinase activator-like 3 (Mob1 homolog 3) (Mob3) OS=Schistosoma mansoni GN=Smp_105710.2 PE=4 SV=1;tr|G4LWC5|G4LWC5_SCHMA Mps one binder kinase activator-like 3 (Mob1 homolog 3) (Mob3) OS=Schistosoma mansoni GN=Smp_10571	4	21.938	-0.221984	18.8212	19.691	18.0357	18.8493	18.9096	19.0256	19.2787	19.0713
G4LWC6	tr|G4LWC6|G4LWC6_SCHMA U520, putative OS=Schistosoma mansoni GN=Smp_105700 PE=4 SV=1	8	250.71	0.644266	15.7215	15.0924	15.8692	15.561	15.2921	14.9517	14.5065	14.9168
G4LWC8;G4LWC9	tr|G4LWC8|G4LWC8_SCHMA Dolichyl-diphosphooligosaccharide--protein glycosyltransferase subunit 1 OS=Schistosoma mansoni GN=Smp_105680.1 PE=3 SV=1;tr|G4LWC9|G4LWC9_SCHMA Dolichyl-diphosphooligosaccharide--protein glycosyltransferase subunit 1 OS=Schistosoma	18	66.262	0.111769	21.859	22.0712	21.8323	21.9208	21.8259	21.529	22.0723	21.8091
G4LWD1	tr|G4LWD1|G4LWD1_SCHMA Uncharacterized protein OS=Schistosoma mansoni GN=Smp_181220 PE=4 SV=1	5	19.208	-0.981128	21.8579	21.0097	20.9025	21.2567	22.031	22.3324	22.3501	22.2379
G4LWE0	tr|G4LWE0|G4LWE0_SCHMA RWD domain-containing protein, putative OS=Schistosoma mansoni GN=Smp_022150 PE=4 SV=1	3	67.264	-0.594009		15.4937		15.4937	16.5353	15.1853	16.5426	16.0877
G4LWE6	tr|G4LWE6|G4LWE6_SCHMA Sortilin OS=Schistosoma mansoni GN=Smp_179360 PE=4 SV=1	4	130.83	0.152392	14.6407			14.6407	14.3595	14.7374	14.3679	14.4883
G4LWE8	tr|G4LWE8|G4LWE8_SCHMA Rab6-interacting protein 2/elks/erc/cast,putative OS=Schistosoma mansoni GN=Smp_197770 PE=4 SV=1	4	185.74	0.519431	16.2286	15.1985	16.0192	15.8154	15.5137	14.7878	15.5865	15.296
G4LWG0	tr|G4LWG0|G4LWG0_SCHMA Uncharacterized protein OS=Schistosoma mansoni GN=Smp_006970 PE=4 SV=1	2	41.489	0.12074	17.3466	17.3972	16.6711	17.1383	17.0544	17.013	16.9852	17.0175
G4LWG5;C5J9R9	tr|G4LWG5|G4LWG5_SCHMA Tyrosine-protein kinase OS=Schistosoma mansoni GN=Smp_006920 PE=3 SV=1;tr|C5J9R9|C5J9R9_SCHMA Tyrosine-protein kinase OS=Schistosoma mansoni GN=tk6 PE=2 SV=1	6	54.904	0.847177	18.7971	18.8417	18.7701	18.803	17.944	18.1193	17.804	17.9558
G4LWI2	tr|G4LWI2|G4LWI2_SCHMA Heat shock protein HSP60, putative OS=Schistosoma mansoni GN=Smp_008545 PE=3 SV=1	31	59.554	-0.682938	25.1091	25.1459	25.2183	25.1578	25.7646	25.7915	25.966	25.8407
G4LWI3	tr|G4LWI3|G4LWI3_SCHMA Aldehyde dehydrogenase,putative OS=Schistosoma mansoni GN=Smp_050390 PE=3 SV=1	28	53.762	-0.732742	26.8341	27.23	27.0756	27.0466	27.7311	27.7865	27.8203	27.7793
G4LWI9;G4LWI7;G4LWI8;G4LWI6	tr|G4LWI9|G4LWI9_SCHMA Vacuolar protein sorting-associated protein 29 OS=Schistosoma mansoni GN=Smp_050350.1 PE=3 SV=1;tr|G4LWI7|G4LWI7_SCHMA Vacuolar protein sorting-associated protein 29 OS=Schistosoma mansoni GN=Smp_050350.3 PE=3 SV=1;tr|G4LWI8|G4LWI8_S	2	16.166	0.548556	18.9948	18.9929	18.587	18.8583	18.2885	17.6273	19.0133	18.3097
G4LWK0	tr|G4LWK0|G4LWK0_SCHMA 60S ribosomal protein L31, putative OS=Schistosoma mansoni GN=Smp_050280 PE=4 SV=1	1	14.113	0.280605	20.1522	21.2123	20.7036	20.6893	20.2212	20.348	20.657	20.4087
G4LWK2	tr|G4LWK2|G4LWK2_SCHMA Phosphorylase B kinase alpha, kpb1, putative OS=Schistosoma mansoni GN=Smp_149040 PE=4 SV=1	13	146.72	-1.5928	16.2673	16.3395	17.424	16.6769	18.635	17.5864	18.5878	18.2697
G4LWK3	tr|G4LWK3|G4LWK3_SCHMA Uncharacterized protein OS=Schistosoma mansoni GN=Smp_050250 PE=4 SV=1	8	47.334	-0.595885	19.0952	19.1298	18.9597	19.0616	19.8671	19.8862	19.219	19.6574
G4LWK6	tr|G4LWK6|G4LWK6_SCHMA Complexin, putative OS=Schistosoma mansoni GN=Smp_050220 PE=4 SV=1	2	18.432	-0.141933	19.0209	18.5822	18.7585	18.7872	18.8005	19.9008	18.0862	18.9291
G4LWK9	tr|G4LWK9|G4LWK9_SCHMA Nucleolar protein NOP56, putative OS=Schistosoma mansoni GN=Smp_148990 PE=4 SV=1	2	73.536	0.879831	15.9225	17.184	17.0479	16.7181	15.626	16.1413	15.7477	15.8383
G4LWL6	tr|G4LWL6|G4LWL6_SCHMA NAD dehydrogenase, putative OS=Schistosoma mansoni GN=Smp_050080 PE=4 SV=1	2	49.727	M only				N/A	15.958	15.2859	16.4137	15.8859
G4LWM1	tr|G4LWM1|G4LWM1_SCHMA FACT complex subunit SSRP1 OS=Schistosoma mansoni GN=Smp_148930 PE=3 SV=1	3	72.069	0.634683	17.721	17.0574	16.6589	17.1458	16.8849	16.5876	16.0609	16.5111
G4LWM4	tr|G4LWM4|G4LWM4_SCHMA Casp, putative OS=Schistosoma mansoni GN=Smp_049990 PE=4 SV=1	3	81.04	1.00966	15.6583	19.5442	14.9072	16.7032	15.7563	15.6308		15.6936
G4LWP3	tr|G4LWP3|G4LWP3_SCHMA Uncharacterized protein OS=Schistosoma mansoni GN=Smp_148800 PE=4 SV=1	6	18.461	-0.526184	22.6389	22.4324	21.9079	22.3264	22.861	22.9354	22.7615	22.8526
G4LWP4	tr|G4LWP4|G4LWP4_SCHMA Laminin beta chain-related OS=Schistosoma mansoni GN=Smp_148790 PE=4 SV=1	31	196.58	0.756114	20.3913	20.2823	20.02	20.2312	19.5551	19.1304	19.7398	19.4751
G4LWQ0	tr|G4LWQ0|G4LWQ0_SCHMA Uncharacterized protein OS=Schistosoma mansoni GN=Smp_198230 PE=4 SV=1	7	228.22	-1.38069	14.5922	16.1395		15.3659	16.823	16.6454	16.7713	16.7466
G4LWQ1	tr|G4LWQ1|G4LWQ1_SCHMA Hypoxanthine-guanine phosphoribosyltransferase,putative OS=Schistosoma mansoni GN=Smp_168500 PE=4 SV=1	2	26.018	-0.213447	17.4295	19.0283		18.2289	16.9795	19.0385	19.3091	18.4423
G4LWQ2;P09383	tr|G4LWQ2|G4LWQ2_SCHMA Hypoxanthine phosphoribosyltransferase OS=Schistosoma mansoni GN=Smp_103560 PE=3 SV=1;sp|P09383|HPRT_SCHMA Hypoxanthine-guanine phosphoribosyltransferase OS=Schistosoma mansoni GN=HGPRT PE=1 SV=1	14	28.037	0.0780484	22.8055	23.047	22.9716	22.9414	22.7917	22.8708	22.9275	22.8633
G4LWQ3	tr|G4LWQ3|G4LWQ3_SCHMA Syntaxin, putative OS=Schistosoma mansoni GN=Smp_179930 PE=3 SV=1	2	31.913	0.576846	16.2654	17.1559	18.062	17.1611	17.0306	15.8229	16.8994	16.5843
G4LWR6;C0MP97	tr|G4LWR6|G4LWR6_SCHMA Diaphanous, putative OS=Schistosoma mansoni GN=Smp_068720 PE=4 SV=1;tr|C0MP97|C0MP97_SCHMA Formin-homology protein SmDia OS=Schistosoma mansoni GN=SmDia PE=2 SV=1	7	119.42	0.499358	17.434	17.6579	16.5177	17.2032	16.3837	16.3791	17.3488	16.7039
G4LWS5	tr|G4LWS5|G4LWS5_SCHMA Uncharacterized protein OS=Schistosoma mansoni GN=Smp_113740 PE=4 SV=1	1	13.483	-0.816009	18.8806	18.6396	17.8079	18.4427	19.3765	19.2452	19.1544	19.2587
G4LWS8	tr|G4LWS8|G4LWS8_SCHMA Protein phosphatase 1 regulatory subunit 12b (Myosin phosphatase targeting subunit 2), putative OS=Schistosoma mansoni GN=Smp_143370 PE=4 SV=1	2	121.32	0.827348		15.6285		15.6285	14.4396	15.5329	14.4308	14.8011
G4LWT1	tr|G4LWT1|G4LWT1_SCHMA ATP synthase delta chain, putative OS=Schistosoma mansoni GN=Smp_039000 PE=3 SV=1	6	22.778	-0.990387	22.174	22.2535	22.0913	22.1729	23.1399	23.1658	23.1841	23.1633
G4LWV6	tr|G4LWV6|G4LWV6_SCHMA Uncharacterized protein OS=Schistosoma mansoni GN=Smp_041370 PE=4 SV=1	7	85.224	0.0510196	20.122	20.0222	19.6216	19.922	19.875	19.6614	20.0764	19.8709
G4LWW0	tr|G4LWW0|G4LWW0_SCHMA 14-3-3 protein, putative OS=Schistosoma mansoni GN=Smp_041430.1 PE=3 SV=1	12	27.963	0.37059	23.0857	22.9018	23.3012	23.0962	22.7513	22.8082	22.6175	22.7257
G4LWW1	tr|G4LWW1|G4LWW1_SCHMA Aspartyl-tRNA synthetase, putative OS=Schistosoma mansoni GN=Smp_041450 PE=4 SV=1	17	61.244	-0.367813	20.9132	20.8688	20.6237	20.8019	21.4514	20.8815	21.1762	21.1697
G4LWW2	tr|G4LWW2|G4LWW2_SCHMA Tetraspanin, putative OS=Schistosoma mansoni GN=Smp_041460 PE=3 SV=1	3	30.43	1.02953	20.3677	20.0534	20.2366	20.2192	19.4845	19.1687	18.9159	19.1897
G4LWW7;G4LWW5;G4LWW6	tr|G4LWW7|G4LWW7_SCHMA Rna recognition motif (Rrm) domain containing protein, putative OS=Schistosoma mansoni GN=Smp_041480.1 PE=4 SV=1;tr|G4LWW5|G4LWW5_SCHMA Rna recognition motif (Rrm) domain containing protein, putative OS=Schistosoma mansoni GN=Smp_041	3	56.519	-0.485499	17.2107	18.7734	18.6158	18.2	18.7418	18.7586	18.556	18.6855
G4LWX3	tr|G4LWX3|G4LWX3_SCHMA Ormdl proteins, putative OS=Schistosoma mansoni GN=Smp_210360 PE=4 SV=1	2	17.827	-0.375103	19.9941	21.58	22.621	21.3984	21.9747	21.4273	21.9185	21.7735
G4LWX4	tr|G4LWX4|G4LWX4_SCHMA Ormdl proteins, putative OS=Schistosoma mansoni GN=Smp_210370 PE=4 SV=1	19	80.038	0.149173	20.6267	20.9516	20.5868	20.7217	20.7822	20.048	20.8874	20.5725
G4LWX6	tr|G4LWX6|G4LWX6_SCHMA Uncharacterized protein OS=Schistosoma mansoni GN=Smp_041550 PE=4 SV=1	2	16.693	-0.0668931	19.8875	19.6448	20.0961	19.8761	19.8672	19.9181	20.0438	19.943
G4LWX9	tr|G4LWX9|G4LWX9_SCHMA Splicing factor 3B subunit 3, 5 OS=Schistosoma mansoni GN=Smp_137430 PE=4 SV=1	8	118.9	0.166783	17.9171	16.3559	16.9633	17.0788	17.1052	16.3247	17.306	16.912
G4LWY0;I0B503	tr|G4LWY0|G4LWY0_SCHMA S-methyl-5-thioadenosine phosphorylase OS=Schistosoma mansoni GN=Smp_028190 PE=3 SV=1;tr|I0B503|I0B503_SCHMA S-methyl-5-thioadenosine phosphorylase OS=Schistosoma mansoni PE=1 SV=1	9	32.661	-1.29096	21.2129	21.5961	20.6774	21.1621	22.4757	22.564	22.3195	22.4531
G4LWY1	tr|G4LWY1|G4LWY1_SCHMA Troponin I (TnI), putative OS=Schistosoma mansoni GN=Smp_028200 PE=4 SV=1	4	98.369	0.617026		16.0588	15.8776	15.9682	16.1875	13.6875	16.1785	15.3512
G4LWY6	tr|G4LWY6|G4LWY6_SCHMA HMG-CoA synthase OS=Schistosoma mansoni GN=Smp_198690 PE=4 SV=1	4	36.55	-1.77185			16.2422	16.2422	16.4548	18.9386	18.6487	18.014
G4LWY7	tr|G4LWY7|G4LWY7_SCHMA DUF814 domain protein OS=Schistosoma mansoni GN=Smp_028330 PE=4 SV=1	2	24.216	-1.17724	17.3812	19.289	19.3036	18.6579	19.7312	19.9791	19.7952	19.8352
G4LX00	tr|G4LX00|G4LX00_SCHMA Disulfide oxidoreductase, putative OS=Schistosoma mansoni GN=Smp_137540 PE=4 SV=1	12	76.125	-2.96884	19.2519	19.252	17.262	18.5886	21.575	21.4536	21.6437	21.5575
G4LX03;G4LX02	tr|G4LX03|G4LX03_SCHMA Adenosylhomocysteinase OS=Schistosoma mansoni GN=Smp_028440.1 PE=3 SV=1;tr|G4LX02|G4LX02_SCHMA Adenosylhomocysteinase,putative OS=Schistosoma mansoni GN=Smp_028440.2 PE=4 SV=1	16	47.528	-1.21577	21.0355	21.3858	21.5669	21.3294	22.4598	22.5953	22.5803	22.5452
G4LX23	tr|G4LX23|G4LX23_SCHMA Uncharacterized protein OS=Schistosoma mansoni GN=Smp_075420 PE=4 SV=1	17	35.552	1.41531	24.5654	24.6802	24.8715	24.7057	23.3684	23.2241	23.2787	23.2904
G4LX25	tr|G4LX25|G4LX25_SCHMA Uncharacterized protein OS=Schistosoma mansoni GN=Smp_075400.1 PE=4 SV=1	8	35.869	1.75329	21.8227	21.4744	21.6022	21.6331	20.0528	19.7657	19.8208	19.8798
G4LX27	tr|G4LX27|G4LX27_SCHMA Uncharacterized protein OS=Schistosoma mansoni GN=Smp_162840 PE=4 SV=1	5	33.082	F only	19.5216	20.3618	19.0733	19.6522				N/A
G4LX29	tr|G4LX29|G4LX29_SCHMA Uncharacterized protein OS=Schistosoma mansoni GN=Smp_075370 PE=4 SV=1	11	41.879	2.13129	22.4501	22.4593	22.7026	22.5373	20.4532	20.439	20.3259	20.406
G4LX32	tr|G4LX32|G4LX32_SCHMA Uncharacterized protein OS=Schistosoma mansoni GN=Smp_075350 PE=4 SV=1	4	36.906	0.975018	20.3615	20.2934	20.2877	20.3142	19.3824	19.3505	19.2847	19.3392
G4LX38	tr|G4LX38|G4LX38_SCHMA Vesicle docking protein P115, putative OS=Schistosoma mansoni GN=Smp_168660 PE=4 SV=1	4	105.73	-0.264658	16.5505	15.8319	16.2275	16.2033	16.3164	16.5489	16.5385	16.4679
G4LX40;G4LX41	tr|G4LX40|G4LX40_SCHMA Cop9 complex subunit, putative OS=Schistosoma mansoni GN=Smp_085640.2 PE=4 SV=1;tr|G4LX41|G4LX41_SCHMA Cop9 complex subunit, putative OS=Schistosoma mansoni GN=Smp_085640.1 PE=4 SV=1	9	43.289	0.147323	19.6178	19.8926	20.045	19.8518	19.7145	19.7714	19.6275	19.7045
G4LX53	tr|G4LX53|G4LX53_SCHMA 26S proteasome non-ATPase regulatory subunit 7 (M67 family) OS=Schistosoma mansoni GN=Smp_026630 PE=4 SV=1	5	40.243	-0.802385	19.0883	19.558	20.0762	19.5742	20.5055	20.219	20.4052	20.3766
G4LX57	tr|G4LX57|G4LX57_SCHMA 60S ribosomal protein L38, putative OS=Schistosoma mansoni GN=Smp_058720.1 PE=3 SV=1	2	9.5872	-0.731397	19.4798	20.4528	19.7718	19.9015	20.8099	20.7633	20.3255	20.6329
G4LX66	tr|G4LX66|G4LX66_SCHMA Proteasome regulatory subunit-related OS=Schistosoma mansoni GN=Smp_058650 PE=4 SV=1	16	52.219	0.179445	20.6301	20.9446	21.2205	20.9317	20.5348	20.7609	20.9612	20.7523
G4LX70	tr|G4LX70|G4LX70_SCHMA Protein phosphatase 1 binding protein, putative OS=Schistosoma mansoni GN=Smp_153700 PE=4 SV=1	5	78.001	-0.923331	18.6578	18.1258	17.6837	18.1558	18.8167	19.0346	19.386	19.0791
G4LX81	tr|G4LX81|G4LX81_SCHMA Eukaryotic translation initiation factor 3 subunit B OS=Schistosoma mansoni GN=Smp_058460 PE=3 SV=1	16	76.711	-0.356523	19.3743	19.5539	19.6351	19.5211	19.9344	19.8644	19.8341	19.8776
G4LX87	tr|G4LX87|G4LX87_SCHMA Clumping factor A (Fibrinogen-binding protein A) (Fibrinogen receptor A), putative OS=Schistosoma mansoni GN=Smp_194050 PE=4 SV=1	1	43.482	0.330011	21.1524	20.307	19.542	20.3338	20.0801	20.2328	19.6986	20.0038
G4LX89	tr|G4LX89|G4LX89_SCHMA Cofilin, actophorin, putative OS=Schistosoma mansoni GN=Smp_120700.1 PE=3 SV=1	8	15.726	-0.372425	23.9221	24.1883	24.3027	24.1377	24.5115	24.5289	24.49	24.5101
G4LX92	tr|G4LX92|G4LX92_SCHMA Uncharacterized protein OS=Schistosoma mansoni GN=Smp_167270 PE=4 SV=1	4	16.945	-2.69022	17.7482	19.4826	18.7526	18.6612	21.1527	21.4523	21.4491	21.3514
G4LX93	tr|G4LX93|G4LX93_SCHMA Uncharacterized protein OS=Schistosoma mansoni GN=Smp_167280 PE=4 SV=1	5	8.931	-3.82813	20.3325	19.2437	19.2182	19.5981	23.3018	23.4963	23.4807	23.4263
G4LX94	tr|G4LX94|G4LX94_SCHMA Uncharacterized protein OS=Schistosoma mansoni GN=Smp_083240 PE=4 SV=1	4	17.269	-0.738241	20.8998	20.7347	19.8713	20.5019	21.7702	21.9541	19.9962	21.2402
G4LX99	tr|G4LX99|G4LX99_SCHMA Succinyl-CoA synthetase beta chain, putative OS=Schistosoma mansoni GN=Smp_167330 PE=4 SV=1	11	37.517	-0.0920476	21.7072	21.4645	21.9748	21.7155	21.47	21.8865	22.0662	21.8075
G4LXB1	tr|G4LXB1|G4LXB1_SCHMA Elongation factor 1-gamma, putative OS=Schistosoma mansoni GN=Smp_083410 PE=4 SV=1	16	47.573	-0.183864	24.1104	23.8686	24.0975	24.0255	24.3945	24.0605	24.1731	24.2094
G4LXB4	tr|G4LXB4|G4LXB4_SCHMA Uncharacterized protein OS=Schistosoma mansoni GN=Smp_097620 PE=4 SV=1	4	20.836	-0.00677541	18.4167	19.4758	17.9123	18.6016	18.6259	18.7305	18.4688	18.6084
G4LXB6	tr|G4LXB6|G4LXB6_SCHMA DEAD box ATP-dependent RNA helicase, putative OS=Schistosoma mansoni GN=Smp_097660 PE=4 SV=1	17	44.285	0.492619	22.0525	22.5711	22.172	22.2652	21.8114	21.8284	21.6779	21.7726
G4LXC0	tr|G4LXC0|G4LXC0_SCHMA Uncharacterized protein OS=Schistosoma mansoni GN=Smp_097710 PE=4 SV=1	6	39.024	0.616354	18.0983	18.2952	18.0108	18.1348	17.5484	17.3944	17.6125	17.5184
G4LXC4	tr|G4LXC4|G4LXC4_SCHMA Cold shock domain protein A, putative OS=Schistosoma mansoni GN=Smp_097750 PE=4 SV=1	3	19.686	0.0400899	20.3689	20.3036	20.2737	20.3154	20.0691	20.6099	20.1469	20.2753
G4LXC5	tr|G4LXC5|G4LXC5_SCHMA Nuclease-related OS=Schistosoma mansoni GN=Smp_175840 PE=4 SV=1	3	42.86	-0.208419	17.7168		18.5904	18.1536	18.8266	17.7604	18.4991	18.362
G4LXC6	tr|G4LXC6|G4LXC6_SCHMA Nuclease-related OS=Schistosoma mansoni GN=Smp_175850 PE=4 SV=1	2	28.579	-0.402715	17.1607	16.2842	16.176	16.5403		16.5317	17.3544	16.943
G4LXD0;Q27277;G4LXD2	tr|G4LXD0|G4LXD0_SCHMA Y box binding protein, putative OS=Schistosoma mansoni GN=Smp_097800.2 PE=4 SV=1;tr|Q27277|Q27277_SCHMA Y box binding protein, putative OS=Schistosoma mansoni GN=Smp_097800.1 PE=2 SV=1;tr|G4LXD2|G4LXD2_SCHMA Y box binding protein, pu	4	18.522	0.514515	22.9946	22.5921	23.0988	22.8952	22.5455	22.4491	22.1474	22.3806
G4LXD4	tr|G4LXD4|G4LXD4_SCHMA Ubiquitin thioesterase OS=Schistosoma mansoni GN=Smp_097810.1 PE=3 SV=1	4	31.024	-0.447031	18.6708	19.4771	19.0242	19.0574	19.6068	19.5404	19.366	19.5044
G4LXE8	tr|G4LXE8|G4LXE8_SCHMA Ryanodine receptor related OS=Schistosoma mansoni GN=Smp_163570 PE=4 SV=1	42	559.03	-0.939087	17.1896	15.6815	17.4441	16.7717	18.0419	17.0982	17.9924	17.7108
G4LXF1	tr|G4LXF1|G4LXF1_SCHMA Rab6, putative OS=Schistosoma mansoni GN=Smp_163580 PE=4 SV=1	11	23.256	-0.0743817	23.5471	23.516	23.0691	23.3774	23.4858	23.4284	23.4412	23.4518
G4LXG0	tr|G4LXG0|G4LXG0_SCHMA Uncharacterized protein OS=Schistosoma mansoni GN=Smp_076990 PE=4 SV=1	1	59.925	0.646989		16.4701	16.5827	16.5264	15.724	15.9663	15.948	15.8794
G4LXG8	tr|G4LXG8|G4LXG8_SCHMA Uncharacterized protein OS=Schistosoma mansoni GN=Smp_004550.1 PE=4 SV=1	3	17.376	-1.1678	20.1977	20.111	20.0236	20.1108	21.3333	21.3829	21.1196	21.2786
G4LXH6	tr|G4LXH6|G4LXH6_SCHMA Red protein (Ik factor) (Cytokine ik), putative OS=Schistosoma mansoni GN=Smp_004480 PE=4 SV=1	1	66.921	0.39279		16.0574	16.1363	16.0968	15.4205	15.4514	16.2402	15.7041
G4LXH7;Q9GNF6	tr|G4LXH7|G4LXH7_SCHMA Peroxiredoxin, Prx3 OS=Schistosoma mansoni GN=Smp_004470.1 PE=4 SV=1;tr|Q9GNF6|Q9GNF6_SCHMA Thioredoxin peroxidase 3 OS=Schistosoma mansoni GN=TPx3 PE=2 SV=1	9	24.881	-1.08984	23.9523	23.5483	23.4182	23.6396	24.7488	24.8502	24.5893	24.7294
G4LXI6	tr|G4LXI6|G4LXI6_SCHMA Uncharacterized protein OS=Schistosoma mansoni GN=Smp_004360.1 PE=4 SV=1	1	25.586	0.0693171		17.2345	17.1254	17.18	16.8288	17.3394	17.1638	17.1107
G4LXI7	tr|G4LXI7|G4LXI7_SCHMA Ubiquitin-conjugating enzyme E2 l, putative OS=Schistosoma mansoni GN=Smp_004350 PE=3 SV=1	6	18.205	-0.635384	21.4209	21.2007	21.1653	21.2623	21.9299	22.0041	21.7591	21.8977
G4LXI8	tr|G4LXI8|G4LXI8_SCHMA ATP-binding cassette, sub-family E (Oabp),member, putative OS=Schistosoma mansoni GN=Smp_124460 PE=4 SV=1	5	61.936	0.595165	19.1295	18.1792	19.208	18.8389	18.5976	17.6964	18.4371	18.2437
G4LXL2	tr|G4LXL2|G4LXL2_SCHMA Sorting nexin, putative OS=Schistosoma mansoni GN=Smp_167550 PE=4 SV=1	6	65.709	-0.434303	17.0044	18.2361	17.7088	17.6498	18.0382	17.9973	18.2167	18.0841
G4LXM2;Q6IFU0;G4LX44;C4QR08;G4V6I5	tr|G4LXM2|G4LXM2_SCHMA KRAB-A domain-containing protein OS=Schistosoma mansoni GN=Smp_195120 PE=4 SV=1;tr|Q6IFU0|Q6IFU0_SCHMA Pol polyprotein OS=Schistosoma mansoni PE=2 SV=1;tr|G4LX44|G4LX44_SCHMA Uncharacterized protein OS=Schistosoma mansoni GN=Smp_1785	6	155.62	0.207253	18.1884	19.0184	18.0903	18.4324	17.9688	18.3891	18.3174	18.2251
G4LXM5	tr|G4LXM5|G4LXM5_SCHMA Ubiquitinyl hydrolase 1 OS=Schistosoma mansoni GN=Smp_069960 PE=3 SV=1	9	102.56	-0.443853	17.9214	18.2821	17.1734	17.7923	17.9346	18.2546	18.5193	18.2362
G4LXQ5	tr|G4LXQ5|G4LXQ5_SCHMA Uncharacterized protein OS=Schistosoma mansoni GN=Smp_045400 PE=4 SV=1	6	62.741	-0.257799	18.5553	18.3974	18.5637	18.5055	18.984	18.7586	18.5473	18.7633
G4LXQ9	tr|G4LXQ9|G4LXQ9_SCHMA Fimbrin, putative OS=Schistosoma mansoni GN=Smp_195040 PE=4 SV=1	1	14.257	-1.62991	19.9773	20.0161	20.5202	20.1712	21.9778	21.6448	21.7808	21.8011
G4LXR7;G4LXR6	tr|G4LXR7|G4LXR7_SCHMA Proliferation-associated protein 2G4, 38kDa (M24 family) OS=Schistosoma mansoni GN=Smp_150690.2 PE=4 SV=1;tr|G4LXR6|G4LXR6_SCHMA Proliferation-associated protein 2G4, 38kDa (M24 family) OS=Schistosoma mansoni GN=Smp_150690.1 PE=4 SV=	8	33.472	1.47017	21.5566	21.5075	24.132	22.3987	20.8442	20.6475	21.2938	20.9285
G4LXR9	tr|G4LXR9|G4LXR9_SCHMA NADH-cytochrome b5 reductase OS=Schistosoma mansoni GN=Smp_053230 PE=3 SV=1	17	33.936	-0.552543	24.289	23.8376	24.2751	24.1339	24.864	24.3913	24.804	24.6865
G4LXS1;G4LXS0	tr|G4LXS1|G4LXS1_SCHMA Aldo-keto reductase, putative OS=Schistosoma mansoni GN=Smp_053220.2 PE=4 SV=1;tr|G4LXS0|G4LXS0_SCHMA Aldo-keto reductase, putative OS=Schistosoma mansoni GN=Smp_053220.1 PE=4 SV=1	16	32.492	0.583691	24.6904	24.6483	24.8633	24.734	24.0806	24.2789	24.0914	24.1503
G4LXS6	tr|G4LXS6|G4LXS6_SCHMA Uncharacterized protein OS=Schistosoma mansoni GN=Smp_150640 PE=4 SV=1	10	45.414	-1.89603	18.7466	19.0166	19.0735	18.9455	20.6607	21.0265	20.8375	20.8416
G4LXT2	tr|G4LXT2|G4LXT2_SCHMA 40S ribosomal protein S6 OS=Schistosoma mansoni GN=Smp_053130 PE=3 SV=1	1	28.748	M only				N/A	17.1222	17.0263	18.1258	17.4248
G4LXT7	tr|G4LXT7|G4LXT7_SCHMA ADP-ribosylation factor, arf, putative OS=Schistosoma mansoni GN=Smp_086900 PE=3 SV=1	3	20.165	-0.414749	19.3338	19.5492	19.0291	19.3041	19.9165	19.5482	19.6918	19.7188
G4LXV0	tr|G4LXV0|G4LXV0_SCHMA Rab, putative OS=Schistosoma mansoni GN=Smp_169460 PE=4 SV=1	6	22.235	0.0946683	20.9363	20.8502	20.4233	20.7366	20.6212	20.8411	20.4635	20.6419
G4LXV1	tr|G4LXV1|G4LXV1_SCHMA Rab-18, putative OS=Schistosoma mansoni GN=Smp_169470 PE=4 SV=1	3	22.704	-0.359133	19.0294	18.122	18.4062	18.5192	18.8507	19.0164	18.7678	18.8783
G4LXV8	tr|G4LXV8|G4LXV8_SCHMA Actin-like protein 6, acl6 OS=Schistosoma mansoni GN=Smp_063040 PE=3 SV=1	5	45.541	0.109579	19.2921	19.1381	18.7766	19.0689	19.0227	19.179	18.6764	18.9594
G4LXW3	tr|G4LXW3|G4LXW3_SCHMA High-density lipoprotein receptor (Hdl) OS=Schistosoma mansoni GN=Smp_170110 PE=4 SV=1	16	83.708	0.0789089	19.4717	19.3315	18.2968	19.0333	19.0152	19.0809	18.7672	18.9544
G4LXW9	tr|G4LXW9|G4LXW9_SCHMA 5-AMP-activated protein kinase, beta subunit,putative OS=Schistosoma mansoni GN=Smp_170160 PE=4 SV=1	2	31.43	0.219987	16.3647	17.6255	17.8598	17.2833	17.3865	16.9238	16.8797	17.0634
G4LXX0	tr|G4LXX0|G4LXX0_SCHMA Uncharacterized protein OS=Schistosoma mansoni GN=Smp_170170 PE=4 SV=1	5	117.36	-0.598423	16.7502	14.9554	16.6427	16.1161	17.0235	16.039	17.0811	16.7145
G4LXX4	tr|G4LXX4|G4LXX4_SCHMA Polypeptide N-acetylgalactosaminyltransferase OS=Schistosoma mansoni GN=Smp_005500 PE=3 SV=1	2	74.715	-0.754882		16.0928	15.6212	15.857	16.9675	15.5127	17.3554	16.6119
G4LXX5;G4LXX6	tr|G4LXX5|G4LXX5_SCHMA Cysteine synthase, putative OS=Schistosoma mansoni GN=Smp_125070.1 PE=4 SV=1;tr|G4LXX6|G4LXX6_SCHMA Cysteine synthase, putative OS=Schistosoma mansoni GN=Smp_125070.2 PE=4 SV=1	12	56.108	0.518259	20.9503	21.0868	21.421	21.1527	20.6669	20.5302	20.7063	20.6344
G4LXY2	tr|G4LXY2|G4LXY2_SCHMA Uncharacterized protein OS=Schistosoma mansoni GN=Smp_161510 PE=4 SV=1	5	63.968	0.239792	18.9116	19.1222	18.6245	18.8861	18.5603	18.957	18.4217	18.6463
G4LXY8	tr|G4LXY8|G4LXY8_SCHMA Adenylyl cyclase-associated protein, putative OS=Schistosoma mansoni GN=Smp_161550 PE=4 SV=1	2	44.307	0.536835	17.8483	16.8144	17.4248	17.3625	16.695	16.7792	17.0029	16.8257
G4LXZ3	tr|G4LXZ3|G4LXZ3_SCHMA Rab15, 13, 10, 1, 35, 5, and, putative OS=Schistosoma mansoni GN=Smp_104670 PE=4 SV=1	4	23.904	0.479183	21.6869	21.6029	21.0893	21.4597	20.9703	20.842	21.1293	20.9805
G4LXZ9;G4LY00	tr|G4LXZ9|G4LXZ9_SCHMA UDP-N-acetylglucosamine--dolichyl-phosphate N-acetylglucosaminephosphotransferase OS=Schistosoma mansoni GN=Smp_051360.2 PE=4 SV=1;tr|G4LY00|G4LY00_SCHMA UDP-N-acetylglucosamine--dolichyl-phosphate N-acetylglucosaminephosphotransfera	1	52.392	0.61927	17.7957	18.4304	17.3341	17.8534			17.2341	17.2341
G4LY02	tr|G4LY02|G4LY02_SCHMA NIF3-like protein 1 OS=Schistosoma mansoni GN=Smp_051390 PE=3 SV=1	9	39.11	0.170681	19.9057	19.6695	20.0208	19.8653	19.5366	19.8186	19.7289	19.6947
G4LY04	tr|G4LY04|G4LY04_SCHMA Cytoplasmic dynein light chain, putative OS=Schistosoma mansoni GN=Smp_051400 PE=4 SV=1	3	10.372	2.16521	20.1774	20.0788	19.972	20.0761	17.0664	18.1843	18.4819	17.9109
G4LY12	tr|G4LY12|G4LY12_SCHMA Uncharacterized protein OS=Schistosoma mansoni GN=Smp_212450 PE=4 SV=1	2	32.783	-0.286208	18.9623	19.5536	19.6005	19.3722	19.2519	19.8563	19.8669	19.6584
G4LY16	tr|G4LY16|G4LY16_SCHMA Disco-interacting protein 2 (Dip2), putative (Fragment) OS=Schistosoma mansoni GN=Smp_212570 PE=4 SV=1	2	72.259	-0.447211	16.1865	16.7262	16.4158	16.4429	16.6992	16.9905	16.9805	16.8901
G4LY21	tr|G4LY21|G4LY21_SCHMA DNA-(apurinic or apyrimidinic site) lyase OS=Schistosoma mansoni GN=Smp_051320 PE=3 SV=1	8	32.153	1.49098	18.6228	19.3969	18.598	18.8726	17.4647	17.4853	17.1947	17.3816
G4LY32;G4LY33;G4LY31;G4LY34	tr|G4LY32|G4LY32_SCHMA Tar DNA-binding protein, putative OS=Schistosoma mansoni GN=Smp_051230.4 PE=4 SV=1;tr|G4LY33|G4LY33_SCHMA Tar DNA-binding protein, putative OS=Schistosoma mansoni GN=Smp_051230.2 PE=4 SV=1;tr|G4LY31|G4LY31_SCHMA Tar DNA-binding prote	4	34.816	0.772855	20.9627	20.7969	20.5741	20.7779	19.8392	20.1843	19.9917	20.0051
G4LY37;G4LY38	tr|G4LY37|G4LY37_SCHMA Importin subunit alpha OS=Schistosoma mansoni GN=Smp_051210.1 PE=3 SV=1;tr|G4LY38|G4LY38_SCHMA Importin subunit alpha OS=Schistosoma mansoni GN=Smp_051210.3 PE=3 SV=1	8	58.778	-0.562844	21.5354	21.1941	22.0039	21.5778	22.1724	21.8513	22.3982	22.1406
G4LY48	tr|G4LY48|G4LY48_SCHMA Cell polarity protein OS=Schistosoma mansoni GN=Smp_146240 PE=4 SV=1	2	63.63	0.362245	17.031	16.8602	16.1986	16.6966	16.3344			16.3344
G4LY49	tr|G4LY49|G4LY49_SCHMA Alpha-l-fucosidase, putative OS=Schistosoma mansoni GN=Smp_146250 PE=4 SV=1	2	59.179	-0.583354		17.8253	16.9919	17.4086	17.987	17.9432	18.0456	17.9919
G4LY51	tr|G4LY51|G4LY51_SCHMA Uncharacterized protein OS=Schistosoma mansoni GN=Smp_044680 PE=4 SV=1	7	58.115	-0.22121	18.6543	14.7952	18.8478	17.4324	18.657	16.6546	17.6493	17.6536
G4LY63	tr|G4LY63|G4LY63_SCHMA Succinate dehydrogenase [ubiquinone] flavoprotein subunit, mitochondrial OS=Schistosoma mansoni GN=Smp_061230 PE=3 SV=1	32	71.427	-0.638893	24.2425	24.4177	23.9024	24.1875	24.7327	24.6787	25.0679	24.8264
G4LY73;G4LY72	tr|G4LY73|G4LY73_SCHMA Set, putative OS=Schistosoma mansoni GN=Smp_155060.1 PE=3 SV=1;tr|G4LY72|G4LY72_SCHMA Set, putative OS=Schistosoma mansoni GN=Smp_155060.2 PE=3 SV=1	7	26.653	0.577488	24.2771	24.211	23.5713	24.0198	23.2891	23.5984	23.4394	23.4423
G4LY81	tr|G4LY81|G4LY81_SCHMA Ubiquitin-activating enzyme E1b, putative OS=Schistosoma mansoni GN=Smp_166220 PE=4 SV=1	4	85.392	-1.30301	15.0323	15.6476		15.34	16.6479	16.7681	16.5129	16.643
G4LYA2	tr|G4LYA2|G4LYA2_SCHMA Cysteine and histidine-rich domain (Chord)-containing, zinc binding protein, putative OS=Schistosoma mansoni GN=Smp_020800 PE=4 SV=1	13	38.562	-0.240152	20.7307	20.9816	20.5796	20.764	20.9527	21.1306	20.9292	21.0041
G4LYA4	tr|G4LYA4|G4LYA4_SCHMA Dolichyl-diphosphooligosaccharide--protein glycosyltransferase subunit DAD1 OS=Schistosoma mansoni GN=Smp_020770 PE=3 SV=1	1	15.086	0.372335	20.9607	19.9415	20.0841	20.3288	20.2542	19.4785	20.1366	19.9564
G4LYB3	tr|G4LYB3|G4LYB3_SCHMA Sec31-related protein OS=Schistosoma mansoni GN=Smp_212490 PE=4 SV=1	5	197.68	-0.354757	16.4042	16.0353	15.3948	15.9448	16.668	15.7673	16.4634	16.2995
G4LYB8;G4LYB6;G4LYB7	tr|G4LYB8|G4LYB8_SCHMA Heterogeneous nuclear ribonucleoprotein,putative OS=Schistosoma mansoni GN=Smp_056810.3 PE=4 SV=1;tr|G4LYB6|G4LYB6_SCHMA Heterogeneous nuclear ribonucleoprotein,putative OS=Schistosoma mansoni GN=Smp_056810.2 PE=4 SV=1;tr|G4LYB7|G4LY	6	41.934	-0.166333	21.4097	21.3149	21.0645	21.263	21.5023	21.5234	21.2624	21.4294
G4LYC3;Q26593	tr|G4LYC3|G4LYC3_SCHMA Protein disulfide-isomerase OS=Schistosoma mansoni GN=Smp_056760 PE=3 SV=1;tr|Q26593|Q26593_SCHMA Protein disulfide-isomerase OS=Schistosoma mansoni PE=3 SV=1	30	54.16	-0.103456	24.7381	24.6487	24.5591	24.6487	24.5215	24.7948	24.94	24.7521
G4LYC4	tr|G4LYC4|G4LYC4_SCHMA Bestrophin homolog (Fragment) OS=Schistosoma mansoni GN=Smp_179490 PE=3 SV=1	6	65.42	-0.116893	19.268	18.4449	19.1071	18.94	19.4409	18.1918	19.538	19.0569
G4LYD1	tr|G4LYD1|G4LYD1_SCHMA MEG-5 OS=Schistosoma mansoni GN=Smp_152580 PE=4 SV=1	1	8.8843	-0.406875	20.1929	19.6587	18.8947	19.5821	20.0212	20.1388	19.8069	19.989
G4LYD3;G4LYD4	tr|G4LYD3|G4LYD3_SCHMA Pyridoxine kinase OS=Schistosoma mansoni GN=Smp_164250.2 PE=4 SV=1;tr|G4LYD4|G4LYD4_SCHMA Pyridoxine kinase OS=Schistosoma mansoni GN=Smp_164250.1 PE=4 SV=1	2	36.891	0.241306	17.49	18.0593	18.0146	17.8546	16.6189	18.1188	18.1022	17.6133
G4LYD9	tr|G4LYD9|G4LYD9_SCHMA Importin-alpha re-exporter (Chromosome segregation 1-like protein) OS=Schistosoma mansoni GN=Smp_128050 PE=4 SV=1	12	117.34	-1.37952	18.1973	17.2302	14.868	16.7651	18.3532	17.9055	18.1752	18.1447
G4LYE5	tr|G4LYE5|G4LYE5_SCHMA Uncharacterized protein OS=Schistosoma mansoni GN=Smp_152440 PE=4 SV=1	3	60.625	0.0105392	15.952	16.8292	16.4764	16.4192	16.7993	16.3418	16.0848	16.4086
G4LYE6	tr|G4LYE6|G4LYE6_SCHMA Proteasome subunit beta OS=Schistosoma mansoni GN=Smp_056500 PE=3 SV=1	4	27.78	0.362363	20.7614	20.6401	20.3068	20.5694	20.0702	20.4153	20.1357	20.2071
G4LYF6	tr|G4LYF6|G4LYF6_SCHMA Phosphatidylcholine-sterol acyltransferase (Lecithin-cholesterol acyltransferase)/ Phospholipase A OS=Schistosoma mansoni GN=Smp_166500.1 PE=4 SV=1	5	46.242	-1.42496	15.5299	17.1906	17.4436	16.7214	17.7857	18.0926	18.5606	18.1463
G4LYF7	tr|G4LYF7|G4LYF7_SCHMA Troponin t, invertebrate, putative OS=Schistosoma mansoni GN=Smp_179810 PE=4 SV=1	15	37.437	-0.290669	27.215	27.2477	26.9258	27.1295	27.2001	27.4599	27.6005	27.4202
G4LYF8	tr|G4LYF8|G4LYF8_SCHMA ADP-ribosylation factor family OS=Schistosoma mansoni GN=Smp_000730 PE=3 SV=1	6	20.114	0.173276	21.4741	21.2725	20.3934	21.0467	20.5174	20.7187	21.3841	20.8734
G4LYG1	tr|G4LYG1|G4LYG1_SCHMA Uncharacterized protein OS=Schistosoma mansoni GN=Smp_000700 PE=4 SV=1	4	89.538	-1.05301	17.2079	14.7014	16.1926	16.0339	17.6065	16.432	17.2224	17.087
G4LYI3	tr|G4LYI3|G4LYI3_SCHMA Gdp-mannose pyrophosphorylase b, isoform 2 OS=Schistosoma mansoni GN=Smp_000510 PE=4 SV=1	4	45.99	-0.148772	18.9918	18.807	18.4236	18.7408	18.6132	18.7554	19.3001	18.8896
G4LYI7	tr|G4LYI7|G4LYI7_SCHMA Eukaryotic translation initiation factor 3 subunit C OS=Schistosoma mansoni GN=Smp_000480 PE=3 SV=1	6	100.22	-0.278228	18.2648	16.3774	16.6061	17.0827	17.6118	16.7559	17.7152	17.361
G4LYI8	tr|G4LYI8|G4LYI8_SCHMA ATP-dependent (S)-NAD(P)H-hydrate dehydratase OS=Schistosoma mansoni GN=Smp_000470 PE=3 SV=1	3	31.975	-0.582713	18.9085	18.9234	19.422	19.0846	19.6541	19.6273	19.7206	19.6674
G4LYJ0	tr|G4LYJ0|G4LYJ0_SCHMA Uncharacterized protein OS=Schistosoma mansoni GN=Smp_000460 PE=4 SV=1	7	89.086	-1.13056	19.465	19.7219	16.4329	18.5399	19.6699	19.8877	19.4538	19.6705
G4LYK6	tr|G4LYK6|G4LYK6_SCHMA V-type proton ATPase subunit G OS=Schistosoma mansoni GN=Smp_054220 PE=3 SV=1	3	13.674	-0.299255	20.3498	20.964	20.9285	20.7474	21.1062	21.1647	20.8693	21.0467
G4LYK7	tr|G4LYK7|G4LYK7_SCHMA NADH-ubiquinone oxidoreductase sgdh subunit,putative OS=Schistosoma mansoni GN=Smp_054200 PE=4 SV=1	2	24.033	-0.889638	18.5969	19.3664	18.979	18.9808	19.7718	19.8172	20.0222	19.8704
G4LYN1	tr|G4LYN1|G4LYN1_SCHMA Neuroendocrine differentiation factor, putative OS=Schistosoma mansoni GN=Smp_032150 PE=3 SV=1	2	24.264	0.276714	19.8766	19.3017	19.4504	19.5429	19.616	18.9643	19.2182	19.2662
G4LYN4	tr|G4LYN4|G4LYN4_SCHMA ADP-ribosylation factor, arf, putative OS=Schistosoma mansoni GN=Smp_032180 PE=4 SV=1	4	20.377	-0.00902944	23.0603	22.7901	22.4092	22.7532	22.9577	22.7178	22.6112	22.7622
G4LYN6	tr|G4LYN6|G4LYN6_SCHMA Lipopolysaccharide kinase,putative OS=Schistosoma mansoni GN=Smp_139630 PE=4 SV=1	1	71.256	-0.129558	15.6327	16.2058	15.8159	15.8848	15.8837	16.0757	16.0836	16.0143
G4LYN7	tr|G4LYN7|G4LYN7_SCHMA Uncharacterized protein OS=Schistosoma mansoni GN=Smp_032230 PE=4 SV=1	2	14.892	0.170144	19.373	19.2305	18.7633	19.1223	19.264	18.8598	18.7327	18.9522
G4LYP2;G4LYP1	tr|G4LYP2|G4LYP2_SCHMA Mitochondrial processing peptidase beta-subunit (M16 family) OS=Schistosoma mansoni GN=Smp_009650.1 PE=3 SV=1;tr|G4LYP1|G4LYP1_SCHMA Mitochondrial processing peptidase beta-subunit (M16 family) OS=Schistosoma mansoni GN=Smp_009650.2	18	53.781	-0.645137	23.3132	23.3324	23.2646	23.3034	23.9147	23.852	24.0789	23.9485
G4LYP9	tr|G4LYP9|G4LYP9_SCHMA Alanine aminotransferase, putative OS=Schistosoma mansoni GN=Smp_130540 PE=4 SV=1	15	53.992	-0.633621	21.1379	21.3183	21.8615	21.4392	21.8785	22.1527	22.1875	22.0729
G4LYQ2	tr|G4LYQ2|G4LYQ2_SCHMA Prominin (Prom) protein, putative OS=Schistosoma mansoni GN=Smp_130520.1 PE=4 SV=1	13	80.566	-0.502807	19.7069	19.7737	19.5156	19.6654	20.4295	19.8459	20.2292	20.1682
G4LYR6	tr|G4LYR6|G4LYR6_SCHMA Dynein light intermediate chain, putative OS=Schistosoma mansoni GN=Smp_130410 PE=4 SV=1	15	63.475	-0.18275	20.2112	20.1043	20.5319	20.2825	20.2649	20.6025	20.5283	20.4652
G4LYR8	tr|G4LYR8|G4LYR8_SCHMA Vacuolar-sorting protein SNF8 OS=Schistosoma mansoni GN=Smp_198850 PE=3 SV=1	3	27.617	0.203829	18.7717	18.1187	19.552	18.8141	18.4049	19.0641	18.3619	18.6103
G4LYS3	tr|G4LYS3|G4LYS3_SCHMA 39S ribosomal protein L19, mitochondrial, putative OS=Schistosoma mansoni GN=Smp_138670 PE=4 SV=1	1	34.662	-0.700708		16.2568		16.2568	16.4384	16.9277	17.5063	16.9575
G4LYT5	tr|G4LYT5|G4LYT5_SCHMA NADH dehydrogenase [ubiquinone] 1 alpha subcomplex subunit 12 OS=Schistosoma mansoni GN=Smp_082940 PE=3 SV=1	7	16.364	-0.468381	21.2649	21.3385	20.571	21.0582	21.2647	21.7157	21.5993	21.5265
G4LYU6;Q26606	tr|G4LYU6|G4LYU6_SCHMA Serpin, putative OS=Schistosoma mansoni GN=Smp_090080 PE=3 SV=1;tr|Q26606|Q26606_SCHMA Serpin (Fragment) OS=Schistosoma mansoni GN=SPI PE=2 SV=1	14	46.005	-0.362553	24.2308	24.2694	24.0889	24.1964	24.4549	24.5731	24.6487	24.5589
G4LYU9	tr|G4LYU9|G4LYU9_SCHMA Uncharacterized protein OS=Schistosoma mansoni GN=Smp_171300 PE=4 SV=1	3	126.9	-0.143442	18.8075	18.4406	17.3956	18.2146	18.506	18.0999	18.4681	18.358
G4LYV3	tr|G4LYV3|G4LYV3_SCHMA Nuclear movement protein nudc, putative OS=Schistosoma mansoni GN=Smp_103320 PE=4 SV=1	10	37.485	0.452099	22.2995	22.2172	22.448	22.3215	21.703	22.0665	21.8389	21.8694
G4LYV4	tr|G4LYV4|G4LYV4_SCHMA Signal recognition particle 9 kD protein,putative OS=Schistosoma mansoni GN=Smp_103310 PE=4 SV=1	2	14.173	-0.182184		18.2193		18.2193	18.0453	18.4331	18.7259	18.4015
G4LYW5	tr|G4LYW5|G4LYW5_SCHMA Ng,ng-dimethylarginine dimethylaminohydrolase,putative OS=Schistosoma mansoni GN=Smp_052560 PE=4 SV=1	2	3.3339	0.470573	22.793	22.3761	23.8237	22.9976	22.4161	22.7806	22.3843	22.527
G4LYW6	tr|G4LYW6|G4LYW6_SCHMA Ng,ng-dimethylarginine dimethylaminohydrolase,putative (Fragment) OS=Schistosoma mansoni GN=Smp_195000 PE=4 SV=1	6	19.384	0.72069	22.0987	21.7565	22.4285	22.0946	21.2348	21.4303	21.4565	21.3739
G4LYW7	tr|G4LYW7|G4LYW7_SCHMA Uncharacterized protein OS=Schistosoma mansoni GN=Smp_150320 PE=4 SV=1	3	106.32	0.111889	16.476	14.8981	16.0064	15.7935	16.6832		14.68	15.6816
G4LYW8	tr|G4LYW8|G4LYW8_SCHMA Uncharacterized protein OS=Schistosoma mansoni GN=Smp_198890 PE=4 SV=1	2	32.271	0.50949	17.0839	18.2915	18.1752	17.8502	16.856	17.0627	18.1035	17.3407
G4LYX7;G4LYX8	tr|G4LYX7|G4LYX7_SCHMA ATP synthase subunit d, mitochondrial OS=Schistosoma mansoni GN=Smp_019750.2 PE=3 SV=1;tr|G4LYX8|G4LYX8_SCHMA Uncharacterized protein OS=Schistosoma mansoni GN=Smp_019750.1 PE=4 SV=1	7	19.958	-1.48746	22.4385	21.8871	21.9815	22.1024	23.6327	23.5692	23.5676	23.5898
G4LYZ1	tr|G4LYZ1|G4LYZ1_SCHMA Glutamate dehydrogenase OS=Schistosoma mansoni GN=Smp_093820 PE=3 SV=1	17	52.403	-0.907242	21.7843	21.4115	21.8493	21.6817	22.6972	22.489	22.5805	22.5889
G4LZ03	tr|G4LZ03|G4LZ03_SCHMA Dihydrolipoamide acetyltransferase component of pyruvate dehydrogenase complex OS=Schistosoma mansoni GN=Smp_066410 PE=3 SV=1	13	52.62	-1.5637	20.5434	20.5981	20.742	20.6278	22.0187	22.1352	22.4208	22.1915
G4LZ21;G4LZ20	tr|G4LZ21|G4LZ21_SCHMA RNA and export factor binding protein, putative OS=Schistosoma mansoni GN=Smp_005260.1 PE=4 SV=1;tr|G4LZ20|G4LZ20_SCHMA RNA and export factor binding protein, putative OS=Schistosoma mansoni GN=Smp_005260.2 PE=4 SV=1	4	23.389	0.660075	19.7553	18.6885	20.7836	19.7425	19.3351	18.1422	19.77	19.0824
G4LZ24	tr|G4LZ24|G4LZ24_SCHMA Cytochrome C1, putative OS=Schistosoma mansoni GN=Smp_005290 PE=4 SV=1	10	33.544	-1.17769	22.6351	22.6298	22.604	22.623	23.5919	23.8903	23.9198	23.8007
G4LZ30;P15845	tr|G4LZ30|G4LZ30_SCHMA Calcium-binding protein, putative OS=Schistosoma mansoni GN=Smp_005350 PE=4 SV=1;sp|P15845|SM20_SCHMA 20 kDa calcium-binding protein OS=Schistosoma mansoni GN=SM20 PE=2 SV=2	11	57.938	-0.133884	24.2941	23.71	23.5065	23.8369	23.8648	24.1747	23.8727	23.9707
G4LZ37	tr|G4LZ37|G4LZ37_SCHMA Uncharacterized protein OS=Schistosoma mansoni GN=Smp_156790 PE=4 SV=1	2	9.47	-3.55687		15.8047		15.8047	18.4584	19.8039	19.8223	19.3615
G4LZ44	tr|G4LZ44|G4LZ44_SCHMA Rna-binding protein 12 (Sh3/ww domain anchor protein in the nucleus) (Swan), putative OS=Schistosoma mansoni GN=Smp_129950.1 PE=4 SV=1	11	103.6	0.0148043	18.2408	18.7275	17.5718	18.1801	17.9128	18.1687	18.4143	18.1653
G4LZ47;G4LZ46	tr|G4LZ47|G4LZ47_SCHMA Uncharacterized protein OS=Schistosoma mansoni GN=Smp_164450.2 PE=4 SV=1;tr|G4LZ46|G4LZ46_SCHMA Uncharacterized protein OS=Schistosoma mansoni GN=Smp_164450.1 PE=4 SV=1	3	81.236	1.24797	16.4075	20.2004	17.564	18.0573	16.4698	16.944	17.0143	16.8093
G4LZ54	tr|G4LZ54|G4LZ54_SCHMA Syntaxin-12, putative OS=Schistosoma mansoni GN=Smp_125640 PE=4 SV=1	5	26.822	-0.480848	20.2307	20.9692	20.3381	20.5127	20.8618	21.3102	20.8086	20.9935
G4LZ56	tr|G4LZ56|G4LZ56_SCHMA Heterogeneous nuclear ribonucleoprotein l (Hnrnp l), putative OS=Schistosoma mansoni GN=Smp_006440 PE=4 SV=1	10	76.414	0.394702	19.391	19.7643	19.6741	19.6098	19.0089	19.1805	19.4559	19.2151
G4LZ58	tr|G4LZ58|G4LZ58_SCHMA Developmentally regulated GTP-binding protein-related OS=Schistosoma mansoni GN=Smp_125670 PE=4 SV=1	1	39.05	1.53919	17.4414	15.9838	20.273	17.8994	16.3602			16.3602
G4LZ69	tr|G4LZ69|G4LZ69_SCHMA Proteasome subunit alpha type OS=Schistosoma mansoni GN=Smp_076230 PE=3 SV=1	9	29.736	-0.182164	21.7449	22.46	21.9041	22.0363	22.1971	22.1317	22.3266	22.2185
G4LZ70	tr|G4LZ70|G4LZ70_SCHMA Cysteine desulfurylase, putative OS=Schistosoma mansoni GN=Smp_075470 PE=3 SV=1	11	49.463	-0.445278	20.5982	20.4559	20.4653	20.5065	20.8522	20.9044	21.0986	20.9517
G4LZ71	tr|G4LZ71|G4LZ71_SCHMA Putative neutral sphingomyelinase OS=Schistosoma mansoni GN=Smp_162880 PE=4 SV=1	6	49.498	0.829303	18.5222	19.0437	18.0285	18.5314	17.3955	17.9194	17.7916	17.7021
G4LZ73;G4LZ74;G4LZ75	tr|G4LZ73|G4LZ73_SCHMA Programmed cell death protein, putative OS=Schistosoma mansoni GN=Smp_067480.1 PE=4 SV=1;tr|G4LZ74|G4LZ74_SCHMA Programmed cell death protein, putative OS=Schistosoma mansoni GN=Smp_067480.3 PE=4 SV=1;tr|G4LZ75|G4LZ75_SCHMA Programme	3	15.854	0.127621	20.9632	20.7956	20.6257	20.7948	20.7804	20.6356	20.5856	20.6672
G4LZ93	tr|G4LZ93|G4LZ93_SCHMA Oligosaccharyl transferase, putative OS=Schistosoma mansoni GN=Smp_158600 PE=4 SV=1	7	87.94	0.0171168	18.0465	19.2002	19.2573	18.8347	18.0862	18.9708	19.3957	18.8176
G4LZ98;G4LZ99	tr|G4LZ98|G4LZ98_SCHMA Nitrilase-related OS=Schistosoma mansoni GN=Smp_120080.1 PE=4 SV=1;tr|G4LZ99|G4LZ99_SCHMA Nitrilase-related OS=Schistosoma mansoni GN=Smp_120080.2 PE=4 SV=1	4	31.047	0.237645	17.6343	19.2629	18.921	18.6061	18.3739	17.7303	19.0011	18.3684
G4LZA8	tr|G4LZA8|G4LZA8_SCHMA Uncharacterized protein OS=Schistosoma mansoni GN=Smp_121660 PE=4 SV=1	4	24.804	-1.30749	19.6173	20.058	19.7461	19.8071	20.7728	21.6263	20.9448	21.1146
G4LZB1	tr|G4LZB1|G4LZB1_SCHMA Translocon-associated protein, gamma subunit,putative OS=Schistosoma mansoni GN=Smp_074700 PE=4 SV=1	1	20.323	0.458621	20.8467	20.7565		20.8016	20.2201	20.1443	20.6645	20.343
G4LZC4	tr|G4LZC4|G4LZC4_SCHMA Linker histone H1 OS=Schistosoma mansoni GN=Smp_162370 PE=3 SV=1	2	18.026	1.7529	21.6921	20.9602	20.6537	21.102	19.157	20.0221	18.8682	19.3491
G4LZC5	tr|G4LZC5|G4LZC5_SCHMA Uncharacterized protein OS=Schistosoma mansoni GN=Smp_074590 PE=4 SV=1	2	16.88	-0.13983	22.1311	21.5883	21.4632	21.7275	21.751	22.0928	21.7584	21.8674
G4LZD0	tr|G4LZD0|G4LZD0_SCHMA Citrate synthase OS=Schistosoma mansoni GN=Smp_204770 PE=3 SV=1	18	44.544	-0.715652	24.7858	24.8572	25.1801	24.941	25.532	25.5975	25.8405	25.6567
G4LZE0	tr|G4LZE0|G4LZE0_SCHMA Rab11, putative OS=Schistosoma mansoni GN=Smp_173990 PE=4 SV=1	9	104.86	0.387764	20.4549	21.0036	20.312	20.5902	20.4198	19.6962	20.4912	20.2024
G4LZE5	tr|G4LZE5|G4LZE5_SCHMA Uncharacterized protein OS=Schistosoma mansoni GN=Smp_125130 PE=4 SV=1	1	50.247	F only	15.5575	15.3079	16.0134	15.6263				N/A
G4LZE7	tr|G4LZE7|G4LZE7_SCHMA Uncharacterized protein OS=Schistosoma mansoni GN=Smp_125120.1 PE=4 SV=1	3	33.959	-1.99825	14.5178	17.385	14.7834	15.5621	17.1944	17.9262		17.5603
G4LZG1	tr|G4LZG1|G4LZG1_SCHMA Short chain dehydrogenase,putative OS=Schistosoma mansoni GN=Smp_076580 PE=4 SV=1	7	38.391	-0.623145	19.1188	19.6262	19.7821	19.509	20.1056	20.0814	20.2095	20.1322
G4LZH2	tr|G4LZH2|G4LZH2_SCHMA Dystrophin-like protein OS=Schistosoma mansoni GN=Smp_076500 PE=4 SV=1	1	235.35	1.76342	20.1475	20.3767	20.3371	20.2871	18.6017	18.3737	18.5956	18.5237
G4LZI3	tr|G4LZI3|G4LZI3_SCHMA Universal stress protein G, putative OS=Schistosoma mansoni GN=Smp_076400 PE=4 SV=1	7	20.276	-1.74252	21.3213	20.8925	20.0713	20.7617	22.6767	22.6481	22.188	22.5042
G4LZI9	tr|G4LZI9|G4LZI9_SCHMA Uncharacterized protein OS=Schistosoma mansoni GN=Smp_160560 PE=4 SV=1	13	79.512	0.294025	21.4851	21.5725	21.7169	21.5915	20.9209	21.525	21.4466	21.2975
G4LZJ3	tr|G4LZJ3|G4LZJ3_SCHMA Uncharacterized protein OS=Schistosoma mansoni GN=Smp_070640 PE=4 SV=1	9	106.53	-0.237911	18.5146	18.2532	18.7261	18.498	18.9982	18.6719	18.5376	18.7359
G4LZJ4	tr|G4LZJ4|G4LZJ4_SCHMA Uncoordinated protein 112 (Mitogen inducible mig-2 protein like) OS=Schistosoma mansoni GN=Smp_070630 PE=4 SV=1	2	15.192	0.445031	20.1212	18.8094	19.4194	19.45	19.0609	18.4447	19.5094	19.005
G4LZJ7	tr|G4LZJ7|G4LZJ7_SCHMA Ankyrin repeat-containing, putative OS=Schistosoma mansoni GN=Smp_212250 PE=4 SV=1	2	36.558	-0.493039	17.0247	17.1125	17.3848	17.174	17.6779	17.852	17.4712	17.667
G4LZK0	tr|G4LZK0|G4LZK0_SCHMA Transaldolase OS=Schistosoma mansoni GN=Smp_070600 PE=4 SV=1	21	37.763	0.61004	23.708	24.0725	24.3782	24.0529	23.2199	23.3583	23.7504	23.4428
G4LZM1	tr|G4LZM1|G4LZM1_SCHMA DEAD box ATP-dependent RNA helicase, putative OS=Schistosoma mansoni GN=Smp_096530 PE=4 SV=1	3	30.239	0.143522	19.2178	19.492	19.0615	19.2571	18.8389	19.4388	19.063	19.1136
G4LZM8	tr|G4LZM8|G4LZM8_SCHMA Annexin, putative (Fragment) OS=Schistosoma mansoni GN=Smp_155580 PE=4 SV=1	9	41.045	-3.51	17.2816	19.0595	17.483	17.9414	21.3867	21.4989	21.4685	21.4514
G4LZM9	tr|G4LZM9|G4LZM9_SCHMA Uncharacterized protein OS=Schistosoma mansoni GN=Smp_155570 PE=3 SV=1	1	49.154	0.193016	17.685	18.6939	18.8401	18.4063	18.138	17.7268	18.7753	18.2133
G4LZN0	tr|G4LZN0|G4LZN0_SCHMA Serpin, putative OS=Schistosoma mansoni GN=Smp_155560 PE=3 SV=1	9	43.592	0.469157	21.1288	20.3756	21.8582	21.1208	21.0706	20.5998	20.2847	20.6517
G4LZN2	tr|G4LZN2|G4LZN2_SCHMA Serpin, putative OS=Schistosoma mansoni GN=Smp_062120 PE=3 SV=1	14	43.886	0.254065	22.3119	21.6913	22.491	22.1647	22.1771	21.804	21.751	21.9107
G4LZN7;G4LZN8	tr|G4LZN7|G4LZN7_SCHMA Sulfide quinone reductase, putative OS=Schistosoma mansoni GN=Smp_062070.1 PE=4 SV=1;tr|G4LZN8|G4LZN8_SCHMA Sulfide quinone reductase, putative OS=Schistosoma mansoni GN=Smp_062070.2 PE=4 SV=1	19	50.922	-0.493697	22.8388	21.971	22.681	22.4969	23.0674	22.8369	23.0675	22.9906
G4LZP1;G4LZP2	tr|G4LZP1|G4LZP1_SCHMA Uncharacterized protein (Fragment) OS=Schistosoma mansoni GN=Smp_155510.2 PE=4 SV=1;tr|G4LZP2|G4LZP2_SCHMA Uncharacterized protein (Fragment) OS=Schistosoma mansoni GN=Smp_155510.1 PE=4 SV=1	1	22.436	0.24475	19.0688	19.0515	18.714	18.9448	18.591	18.9208	18.5883	18.7
G4LZP4	tr|G4LZP4|G4LZP4_SCHMA Uncharacterized protein OS=Schistosoma mansoni GN=Smp_096840 PE=4 SV=1	1	15.585	-0.576438	19.1672	19.9436	19.2174	19.4427	19.8448	20.258	19.9547	20.0192
G4LZQ3	tr|G4LZQ3|G4LZQ3_SCHMA Uncharacterized protein OS=Schistosoma mansoni GN=Smp_080670 PE=4 SV=1	5	15.527	-0.26889	21.1074	21.4539	21.2633	21.2749	21.4236	21.5885	21.6193	21.5438
G4LZR0	tr|G4LZR0|G4LZR0_SCHMA Uncharacterized protein OS=Schistosoma mansoni GN=Smp_080610 PE=4 SV=1	2	19.51	-0.999972	18.0577	18.3162	17.7385	18.0375	19.4362	19.6602	18.0159	19.0374
G4LZR2	tr|G4LZR2|G4LZR2_SCHMA Synaptotagmin, putative OS=Schistosoma mansoni GN=Smp_069120 PE=4 SV=1	5	46.918	1.37086	19.576	20.1698	19.8251	19.857	18.8685	17.8845	18.7053	18.4861
G4LZT0	tr|G4LZT0|G4LZT0_SCHMA Uncharacterized protein OS=Schistosoma mansoni GN=Smp_174490 PE=4 SV=1	9	61.351	-0.0988896	21.6701	21.4881	21.1387	21.4323	21.1837	21.5942	21.8157	21.5312
G4LZU4	tr|G4LZU4|G4LZU4_SCHMA Phosphatidylinositol transfer protein OS=Schistosoma mansoni GN=Smp_029310 PE=4 SV=1	5	27.48	-0.14947	20.1383	20.0652	20.971	20.3915	20.0426	20.6567	20.9236	20.541
G4LZU7	tr|G4LZU7|G4LZU7_SCHMA Uncharacterized protein OS=Schistosoma mansoni GN=Smp_138010 PE=4 SV=1	2	15.653	0.251083	19.4877	19.3432	18.4514	19.0941	18.9984	19.1371	18.3935	18.843
G4LZY0	tr|G4LZY0|G4LZY0_SCHMA Cofilin OS=Schistosoma mansoni GN=Smp_195080 PE=3 SV=1	6	15.659	-0.549733	23.6392	23.5062	22.8985	23.348	23.837	23.9979	23.8581	23.8977
G4LZY3	tr|G4LZY3|G4LZY3_SCHMA Proteasome subunit alpha type OS=Schistosoma mansoni GN=Smp_067890 PE=3 SV=1	7	23.257	0.1158	22.8026	22.7685	22.6178	22.7297	22.6628	22.6668	22.512	22.6139
G4LZY4	tr|G4LZY4|G4LZY4_SCHMA Cdc37-related OS=Schistosoma mansoni GN=Smp_067900 PE=4 SV=1	11	45.374	0.0895286	21.8266	21.9238	22.1713	21.9739	21.8078	21.979	21.8663	21.8844
G4LZZ3;G4LZZ2	tr|G4LZZ3|G4LZZ3_SCHMA Neuronal calcium sensor, putative OS=Schistosoma mansoni GN=Smp_158990 PE=4 SV=1;tr|G4LZZ2|G4LZZ2_SCHMA Neuronal calcium sensor, putative OS=Schistosoma mansoni GN=Smp_158980 PE=4 SV=1	3	21.958	1.2434	17.5979	18.3941	17.9543	17.9821	15.909	17.1449	17.1622	16.7387
G4LZZ5;G4LZZ6;G4LZZ4;G4LZZ7;G4LZZ8	tr|G4LZZ5|G4LZZ5_SCHMA Ubiquitin conjugating enzyme E2, putative OS=Schistosoma mansoni GN=Smp_067980.3 PE=3 SV=1;tr|G4LZZ6|G4LZZ6_SCHMA Ubiquitin conjugating enzyme E2, putative OS=Schistosoma mansoni GN=Smp_067980.4 PE=3 SV=1;tr|G4LZZ4|G4LZZ4_SCHMA Ubiqu	3	12.679	-0.388939	21.9047	21.6746	21.2038	21.5944	21.9804	22.0366	21.9329	21.9833
G4M005	tr|G4M005|G4M005_SCHMA Uncharacterized protein OS=Schistosoma mansoni GN=Smp_133310 PE=4 SV=1	2	14.03	-0.210427	19.4009	18.1715	19.089	18.8871	19.2724	19.2924	18.7279	19.0976
G4M010	tr|G4M010|G4M010_SCHMA Low-density lipoprotein receptor (Ldl) OS=Schistosoma mansoni GN=Smp_020550 PE=4 SV=1	24	67.868	0.878595	23.7632	23.6472	23.866	23.7588	22.9781	22.4994	23.163	22.8802
G4M014	tr|G4M014|G4M014_SCHMA Uncharacterized protein OS=Schistosoma mansoni GN=Smp_164500 PE=4 SV=1	4	56.055	0.0651404	18.1824	18.1591	18.5086	18.2833	18.5461	17.9784	18.1302	18.2182
G4M018	tr|G4M018|G4M018_SCHMA Titin, putative OS=Schistosoma mansoni GN=Smp_126240 PE=4 SV=1	227	674.28	-0.389958	22.0818	21.8306	22.1186	22.0104	22.6053	22.157	22.4387	22.4003
G4M019	tr|G4M019|G4M019_SCHMA Uncharacterized protein OS=Schistosoma mansoni GN=Smp_126230 PE=4 SV=1	1	17.849	F only	18.9709	19.0013	19.1231	19.0318				N/A
G4M023	tr|G4M023|G4M023_SCHMA Leukotriene A4 hydrolase (M01 family) OS=Schistosoma mansoni GN=Smp_007550 PE=4 SV=1	15	70.894	-0.740754	20.5844	20.8583	20.3175	20.5867	21.6904	21.2041	21.088	21.3275
G4M039	tr|G4M039|G4M039_SCHMA Neutral alpha-glucosidase ab (Glucosidase II alpha subunit) (Alpha glucosidase 2),putative OS=Schistosoma mansoni GN=Smp_018760 PE=3 SV=1	21	113.28	-0.510526	20.4572	20.5901	19.8296	20.2923	20.8941	20.5852	20.9292	20.8028
G4M047	tr|G4M047|G4M047_SCHMA V-type proton ATPase subunit C OS=Schistosoma mansoni GN=Smp_211280 PE=3 SV=1	4	38.16	0.188629	20.6504	21.2791	20.7076	20.879	20.6224	20.7566	20.6923	20.6904
G4M048	tr|G4M048|G4M048_SCHMA Subfamily S1B unassigned peptidase (S01 family) OS=Schistosoma mansoni GN=Smp_211260 PE=4 SV=1	3	31.039	-1.16279	15.6553			15.6553	17.1688	17.2193	16.0664	16.8181
G4M051;G4M050	tr|G4M051|G4M051_SCHMA 40S ribosomal protein S3a OS=Schistosoma mansoni GN=Smp_073880.1 PE=3 SV=1;tr|G4M050|G4M050_SCHMA 40S ribosomal protein S3a OS=Schistosoma mansoni GN=Smp_073880.2 PE=3 SV=1	9	29.287	0.260643	20.9725	19.8763	22.1578	21.0022	21.3172	20.3134	20.594	20.7416
G4M055	tr|G4M055|G4M055_SCHMA Rac-alpha serine/threonine-protein kinase (Ec 2.7.1.37) (Rac-pk-alpha)(Akt1 kinase) (Protein kinase b) (Pkb) (C-akt) (Thymoma viral proto-oncogene) OS=Schistosoma mansoni GN=Smp_073930.2 PE=4 SV=1	2	88.665	-1.23216		16.1321	15.632	15.8821	17.2469	17.2242	16.8716	17.1142
G4M057	tr|G4M057|G4M057_SCHMA WD-repeat protein, putative OS=Schistosoma mansoni GN=Smp_073940 PE=4 SV=1	17	68.776	0.325391	21.4206	21.3692	21.159	21.3163	21.1042	20.9695	20.8989	20.9909
G4M062	tr|G4M062|G4M062_SCHMA Uncharacterized protein OS=Schistosoma mansoni GN=Smp_074000 PE=4 SV=1	2	33.879	M only				N/A	18.0576	18.0076	17.5667	17.8773
G4M074	tr|G4M074|G4M074_SCHMA Protein kiaa0174, putative OS=Schistosoma mansoni GN=Smp_057650 PE=4 SV=1	5	37.631	0.678035	21.8158	21.4408	21.9082	21.7216	21.0332	21.1404	20.9571	21.0436
G4M080	tr|G4M080|G4M080_SCHMA Serine/threonine kinase OS=Schistosoma mansoni GN=Smp_153170 PE=4 SV=1	21	369.84	-1.44695	15.1577	12.7827	16.3373	14.7592	17.3714	14.7396	16.5076	16.2062
G4M0B9;G4M0B8	tr|G4M0B9|G4M0B9_SCHMA Cle7, putative OS=Schistosoma mansoni GN=Smp_071960.1 PE=4 SV=1;tr|G4M0B8|G4M0B8_SCHMA Cle7, putative OS=Schistosoma mansoni GN=Smp_071960.2 PE=4 SV=1	11	27.86	-0.024788	21.4614	21.4786	21.3755	21.4385	21.5543	21.6193	21.2162	21.4633
G4M0D4	tr|G4M0D4|G4M0D4_SCHMA Cytoplasmic dynein intermediate chain 2, (Dhic-2), putative OS=Schistosoma mansoni GN=Smp_180470 PE=4 SV=1	7	66.052	-0.138428	19.677	20.0948	20.2782	20.0167	20.4183	20.0224	20.0247	20.1551
G4M0E0;G4M0D9	tr|G4M0E0|G4M0E0_SCHMA Lysine--tRNA ligase OS=Schistosoma mansoni GN=Smp_104470.1 PE=3 SV=1;tr|G4M0D9|G4M0D9_SCHMA Lysine--tRNA ligase OS=Schistosoma mansoni GN=Smp_104470.2 PE=4 SV=1	20	71.517	-0.723762	21.6599	21.6444	21.3525	21.5522	22.3472	22.2564	22.2244	22.276
G4M0F3	tr|G4M0F3|G4M0F3_SCHMA Sap18, putative OS=Schistosoma mansoni GN=Smp_085480 PE=4 SV=1	2	26.52	-2.59365	14.2303		15.229	14.7297	17.0661	17.0706	17.8333	17.3233
G4M0F7;Q15ET5	tr|G4M0F7|G4M0F7_SCHMA Vacuolar ATP synthase subunit e, putative OS=Schistosoma mansoni GN=Smp_085520 PE=3 SV=1;tr|Q15ET5|Q15ET5_SCHMA Vacuolar ATP synthase subunit E-like protein OS=Schistosoma mansoni PE=2 SV=1	9	26.581	0.389174	22.6847	21.6693	21.6622	22.0054	21.3428	21.9086	21.5972	21.6162
G4M0F8	tr|G4M0F8|G4M0F8_SCHMA Synapse-associated protein, putative OS=Schistosoma mansoni GN=Smp_085530 PE=4 SV=1	2	44.472	-0.627382	17.8355	17.6133	15.6961	17.0483	16.6255	18.3965	18.005	17.6757
G4M0G4;G4M0G3;G4M0G1;G4M0G2;G4M0F9;G4M0G0	tr|G4M0G4|G4M0G4_SCHMA Myosin heavy chain, putative OS=Schistosoma mansoni GN=Smp_085540.6 PE=3 SV=1;tr|G4M0G3|G4M0G3_SCHMA Myosin heavy chain OS=Schistosoma mansoni GN=Smp_085540.3 PE=3 SV=1;tr|G4M0G1|G4M0G1_SCHMA Myosin heavy chain, putative OS=Schistoso	153	222.18	-0.49295	27.2938	27.248	26.9812	27.1743	27.6227	27.4679	27.9112	27.6673
G4M0I1	tr|G4M0I1|G4M0I1_SCHMA Ankyrin repeat-containing, putative OS=Schistosoma mansoni GN=Smp_166010 PE=4 SV=1	26	141.94	-0.292235	21.2905	21.3811	20.8735	21.1817	21.6156	21.3296	21.4767	21.474
G4M0I3	tr|G4M0I3|G4M0I3_SCHMA Erythrocyte membrane protein, putative OS=Schistosoma mansoni GN=Smp_166030 PE=4 SV=1	29	227.53	-1.35705	20.6044	20.8273	20.9777	20.8031	22.2022	22.1075	22.1708	22.1602
G4M0I4	tr|G4M0I4|G4M0I4_SCHMA Uncharacterized protein OS=Schistosoma mansoni GN=Smp_081370 PE=4 SV=1	4	18.691	-1.54288	22.182	21.8172	21.8697	21.9563	23.6907	23.1838	23.623	23.4992
G4M0I5	tr|G4M0I5|G4M0I5_SCHMA Tumor protein d52, putative OS=Schistosoma mansoni GN=Smp_081380 PE=4 SV=1	3	28.296	0.0763929	18.3254	18.5312	18.3583	18.405	18.6519	18.2249	18.1089	18.3286
G4M0J4	tr|G4M0J4|G4M0J4_SCHMA Alpha-mannosidase OS=Schistosoma mansoni GN=Smp_143430 PE=3 SV=1	1	140.68	0.428006		15.7239	15.5659	15.6449	15.4116	14.8395	15.3996	15.2169
G4M0K2	tr|G4M0K2|G4M0K2_SCHMA Uncharacterized protein OS=Schistosoma mansoni GN=Smp_143410 PE=4 SV=1	17	114.29	-0.320893	20.91	20.3113	20.2418	20.4877	20.7611	20.7734	20.8914	20.8086
G4M0K4;G4M0K5	tr|G4M0K4|G4M0K4_SCHMA 60S ribosomal protein L10, putative OS=Schistosoma mansoni GN=Smp_013200.2 PE=4 SV=1;tr|G4M0K5|G4M0K5_SCHMA 60S ribosomal protein L10, putative OS=Schistosoma mansoni GN=Smp_013200.1 PE=4 SV=1	6	25.112	-0.244788	21.8052	20.9696	22.2779	21.6842	22.2157	21.7811	21.7904	21.929
G4M0L4	tr|G4M0L4|G4M0L4_SCHMA Uncharacterized protein OS=Schistosoma mansoni GN=Smp_129240 PE=4 SV=1	8	40.44	-0.0351546	21.038	21.5702	21.5883	21.3988	21.3432	21.4462	21.5125	21.434
G4M0L7	tr|G4M0L7|G4M0L7_SCHMA Tyrosine--tRNA ligase OS=Schistosoma mansoni GN=Smp_129210 PE=3 SV=1	6	116.06	-0.745161	15.1344		15.8434	15.4889	16.7913	15.4925	16.4184	16.2341
G4M0M2	tr|G4M0M2|G4M0M2_SCHMA Uncharacterized protein OS=Schistosoma mansoni GN=Smp_174850 PE=4 SV=1	2	20.086	-0.144527	18.7817	19.7201	19.622	19.3746	19.2628	19.7288	19.5658	19.5191
G4M0M5;G4M0M6;G4M0M7	tr|G4M0M5|G4M0M5_SCHMA Adenosylhomocysteinase OS=Schistosoma mansoni GN=Smp_096020.2 PE=3 SV=1;tr|G4M0M6|G4M0M6_SCHMA Adenosylhomocysteinase OS=Schistosoma mansoni GN=Smp_096020.3 PE=3 SV=1;tr|G4M0M7|G4M0M7_SCHMA Adenosylhomocysteinase,putative OS=Schistos	8	63.085	0.063354	19.212	18.9811	18.641	18.9447	19.1311	18.4768	19.0362	18.8813
G4M0M8	tr|G4M0M8|G4M0M8_SCHMA DNAj homolog subfamily A member, putative OS=Schistosoma mansoni GN=Smp_096010 PE=3 SV=1	8	50.224	-0.717933	19.0474	18.9813	19.2242	19.0843	19.5771	19.7003	20.1294	19.8022
G4M0N7	tr|G4M0N7|G4M0N7_SCHMA Valine-tRNA ligase OS=Schistosoma mansoni GN=Smp_097590 PE=3 SV=1	12	134.76	0.373191	17.559		17.3661	17.4626	18.6688	15.9158	16.6835	17.0894
G4M0P7;G4M0P8;G4M0P6	tr|G4M0P7|G4M0P7_SCHMA Cell division control protein 48 aaa family protein (Transitional endoplasmic reticulum atpase),putative OS=Schistosoma mansoni GN=Smp_018240.3 PE=3 SV=1;tr|G4M0P8|G4M0P8_SCHMA Cell division control protein 48 aaa family protein (Tra	38	88.808	-0.257842	23.0891	22.5308	22.7079	22.7759	23.3314	22.8263	22.9436	23.0338
G4M0Q5	tr|G4M0Q5|G4M0Q5_SCHMA Uncharacterized protein OS=Schistosoma mansoni GN=Smp_098590 PE=4 SV=1	5	13.281	-1.20509	22.0621	21.7267	21.2748	21.6878	22.9976	23.061	22.6202	22.8929
G4M0S0;A9NI54;G4M0R9;G4M0S1;A9NI55	tr|G4M0S0|G4M0S0_SCHMA 26S protease regulatory subunit 6a, putative OS=Schistosoma mansoni GN=Smp_042270.3 PE=3 SV=1;tr|A9NI54|A9NI54_SCHMA 26S proteasome subunit ATPase 3 (Fragment) OS=Schistosoma mansoni GN=RPT5a PE=2 SV=1;tr|G4M0R9|G4M0R9_SCHMA 26S prot	13	45.456	-0.0171236	20.7458	20.9343	21.4916	21.0573	20.9445	21.2348	21.0439	21.0744
G4M0T5;G4M0T4	tr|G4M0T5|G4M0T5_SCHMA Synaptosomal associated protein, putative OS=Schistosoma mansoni GN=Smp_043940.1 PE=4 SV=1;tr|G4M0T4|G4M0T4_SCHMA Synaptosomal associated protein, putative OS=Schistosoma mansoni GN=Smp_043940.2 PE=4 SV=1	7	26.757	0.42439	19.3506	18.7798	20.1903	19.4403	18.6816	19.2206	19.1454	19.0159
G4M0T7	tr|G4M0T7|G4M0T7_SCHMA DNAj homolog subfamily C member, putative OS=Schistosoma mansoni GN=Smp_043970 PE=4 SV=1	1	28.46	0.968867	18.3338	17.69	17.9832	18.0023	17.0749	16.9281	17.0973	17.0335
G4M0U4	tr|G4M0U4|G4M0U4_SCHMA Calbindin-32, putative OS=Schistosoma mansoni GN=Smp_137750 PE=4 SV=1	3	29.76	-0.396624	18.7225	19.1892	19.2371	19.0496	19.4944	19.5021	19.3421	19.4462
G4M0V2	tr|G4M0V2|G4M0V2_SCHMA Transgelin OS=Schistosoma mansoni GN=Smp_086330.1 PE=3 SV=1	14	21.204	-0.273873	25.4233	25.4751	25.2812	25.3932	25.7386	25.7298	25.5328	25.6671
G4M0V9	tr|G4M0V9|G4M0V9_SCHMA SH3 domain-binding glutamic acid-rich-like protein OS=Schistosoma mansoni GN=Smp_033330 PE=3 SV=1	2	11.926	0.267347	20.8425	20.6565	20.0091	20.5027	20.1634	20.4453	20.0974	20.2354
G4M0W1	tr|G4M0W1|G4M0W1_SCHMA Katanin p60 ATPase-containing subunit A-like 2 OS=Schistosoma mansoni GN=KATNAL2 PE=3 SV=1	1	54.874	-0.247845	21.7463	20.7687	20.7546	21.0898	21.6681	21.2084	21.1365	21.3377
G4M0X2	tr|G4M0X2|G4M0X2_SCHMA Ubiquilin 1,2, putative OS=Schistosoma mansoni GN=Smp_010290 PE=4 SV=1	6	58.648	0.123428	21.6844	21.4571	21.5483	21.5633	21.4279	21.5196	21.372	21.4399
G4M0Y0	tr|G4M0Y0|G4M0Y0_SCHMA GMP synthetase (Glutamine-hydrolysing) OS=Schistosoma mansoni GN=Smp_063830 PE=4 SV=1	25	81.371	-0.548552	21.377	22.3821	21.0285	21.5959	21.754	22.9678	21.7114	22.1444
G4M0Y5;G4M0Y6	tr|G4M0Y5|G4M0Y5_SCHMA Ubiquitin-conjugating enzyme E2 j2, putative OS=Schistosoma mansoni GN=Smp_059750.1 PE=3 SV=1;tr|G4M0Y6|G4M0Y6_SCHMA Ubiquitin-conjugating enzyme E2 j2, putative OS=Schistosoma mansoni GN=Smp_059750.2 PE=3 SV=1	1	25.358	-0.326435	17.1329	18.1758	18.0808	17.7965	17.8606	18.2441	18.2641	18.1229
G4M0Y8	tr|G4M0Y8|G4M0Y8_SCHMA Uncharacterized protein OS=Schistosoma mansoni GN=Smp_154330 PE=4 SV=1	4	28.589	-0.165621	16.5061	18.8247	16.1834	17.1714	15.9444	18.678	17.3887	17.337
G4M0Z5	tr|G4M0Z5|G4M0Z5_SCHMA Zinc finger protein, putative OS=Schistosoma mansoni GN=Smp_095680 PE=4 SV=1	1	22.695	1.50791		17.9161	17.9411	17.9286	15.19	16.9095	17.1625	16.4207
G4M101;G4M102	tr|G4M101|G4M101_SCHMA 4.1 G protein, putative OS=Schistosoma mansoni GN=Smp_095620.1 PE=4 SV=1;tr|G4M102|G4M102_SCHMA 4.1 G protein, putative OS=Schistosoma mansoni GN=Smp_095620.2 PE=4 SV=1	16	76.794	0.389716	20.6289	19.7575	20.8952	20.4272	20.7401	19.3726	19.9998	20.0375
G4M103	tr|G4M103|G4M103_SCHMA Vesicular integral-membrane protein vip36 (Mannose-binding lectin 2)-related OS=Schistosoma mansoni GN=Smp_174580 PE=4 SV=1	8	34.881	-0.332323	21.4599	22.028	21.5248	21.6709	21.6549	22.0873	22.2674	22.0032
G4M115	tr|G4M115|G4M115_SCHMA Uncharacterized protein OS=Schistosoma mansoni GN=Smp_212230 PE=4 SV=1	4	30.062	-0.308794	19.9474	19.6597	19.3191	19.6421	20.1236	19.9056	19.8233	19.9509
G4M126;G4M127	tr|G4M126|G4M126_SCHMA Eukaryotic translation initiation factor 3 subunit E OS=Schistosoma mansoni GN=Smp_176230.1 PE=3 SV=1;tr|G4M127|G4M127_SCHMA Eukaryotic translation initiation factor 3 subunit E OS=Schistosoma mansoni GN=Smp_176230.2 PE=3 SV=1	6	51.923	0.32191	18.9903	18.7317	18.9488	18.8903	18.5314	18.5161	18.6576	18.5684
G4M145;G4M146	tr|G4M145|G4M145_SCHMA Islet cell autoantigen, putative OS=Schistosoma mansoni GN=Smp_126770.1 PE=4 SV=1;tr|G4M146|G4M146_SCHMA Islet cell autoantigen, putative OS=Schistosoma mansoni GN=Smp_126770.2 PE=4 SV=1	1	58.071	M only				N/A	15.8761	15.3952	15.0727	15.448
G4M183	tr|G4M183|G4M183_SCHMA Proteasome subunit alpha type OS=Schistosoma mansoni GN=Smp_070930 PE=3 SV=1	7	27.774	0.0289232	22.7777	22.6366	22.4107	22.6084	22.3615	22.6704	22.7063	22.5794
G4M184	tr|G4M184|G4M184_SCHMA SLAP, putative (Fragment) OS=Schistosoma mansoni GN=Smp_070920.1 PE=4 SV=1	6	81.29	-0.0300857	17.143	17.1651	15.3869	16.565	16.7479	16.4746	16.5627	16.5951
G4M190	tr|G4M190|G4M190_SCHMA Ras suppressor protein 1, rsu1, putative OS=Schistosoma mansoni GN=Smp_114090 PE=4 SV=1	3	26.083	-0.199428	20.1607	19.5376	19.8617	19.8533	20.1685	19.8728	20.117	20.0527
G4M193	tr|G4M193|G4M193_SCHMA Sulfhydryl oxidase OS=Schistosoma mansoni GN=Smp_098710 PE=4 SV=1	13	47.815	-0.87775	21.0583	21.0058	20.6366	20.9002	21.858	21.6538	21.8221	21.778
G4M194	tr|G4M194|G4M194_SCHMA Uncharacterized protein OS=Schistosoma mansoni GN=Smp_176410 PE=4 SV=1	2	58.653	-0.0895328	15.6951		16.6656	16.1803	17.1724	15.5316	16.1056	16.2699
G4M1B1	tr|G4M1B1|G4M1B1_SCHMA Mitogen-activated protein kinase OS=Schistosoma mansoni GN=Smp_142050 PE=3 SV=1	2	45.3	0.832605	16.9821	16.8404	17.0414	16.9547	15.778	16.4042	16.1839	16.1221
G4M1B6	tr|G4M1B6|G4M1B6_SCHMA Uncharacterized protein OS=Schistosoma mansoni GN=Smp_036950 PE=4 SV=1	4	74.215	0.410766	15.5743	15.9631	17.0006	16.1793	17.1779	14.2912	15.8366	15.7686
G4M1E1	tr|G4M1E1|G4M1E1_SCHMA Nitrilase-related OS=Schistosoma mansoni GN=Smp_056890.1 PE=4 SV=1	17	64.055	0.172915	21.289	21.2819	21.514	21.3616	21.2671	21.2216	21.0773	21.1887
G4M1F3;Q15ER7	tr|G4M1F3|G4M1F3_SCHMA 60S ribosomal protein L14, putative OS=Schistosoma mansoni GN=Smp_175740.1 PE=4 SV=1;tr|Q15ER7|Q15ER7_SCHMA 60S ribosomal protein L14, putative OS=Schistosoma mansoni GN=Smp_175740.2 PE=2 SV=1	5	15.181	0.449222	21.7733	20.5885	21.6558	21.3392	21.1269	20.7256	20.8174	20.89
G4M1G1	tr|G4M1G1|G4M1G1_SCHMA Tip120, putative OS=Schistosoma mansoni GN=Smp_170510 PE=4 SV=1	10	145.66	0.106221	18.1073	17.2445	17.9813	17.7777	18.4071	16.685	17.9223	17.6715
G4M1G3	tr|G4M1G3|G4M1G3_SCHMA Uncharacterized protein OS=Schistosoma mansoni GN=Smp_062920 PE=4 SV=1	1	143.81	-0.760616	15.4875	15.5783	15.5307	15.5322	16.1571	16.3723	16.3489	16.2928
G4M1G7	tr|G4M1G7|G4M1G7_SCHMA Growth factor receptor-bound protein, putative OS=Schistosoma mansoni GN=Smp_062950 PE=4 SV=1	5	27.04	-0.15217	20.0384	20.2145	20.4681	20.2403	20.2842	20.3506	20.5427	20.3925
G4M1H5	tr|G4M1H5|G4M1H5_SCHMA Calcium-transporting ATPase OS=Schistosoma mansoni GN=Smp_199210 PE=3 SV=1	28	105.07	0.378327	23.2978	23.0065	23.1301	23.1448	22.8118	22.4044	23.0832	22.7665
G4M1J2	tr|G4M1J2|G4M1J2_SCHMA Formin-like OS=Schistosoma mansoni GN=Smp_144430 PE=4 SV=1	7	117.96	1.51837	17.9338	17.4007	16.3913	17.2419	16.4415	15.8134	14.9157	15.7236
G4M1K0	tr|G4M1K0|G4M1K0_SCHMA Dynamin-associated protein, putative OS=Schistosoma mansoni GN=Smp_135790 PE=4 SV=1	7	180.9	0.175162	17.5054	18.045	16.425	17.3251	16.9448	17.4651	17.04	17.15
G4M1K4	tr|G4M1K4|G4M1K4_SCHMA Uncharacterized protein OS=Schistosoma mansoni GN=Smp_212060 PE=4 SV=1	4	74.404	-1.01223	15.447	17.396		16.4215	17.7182	16.7459	17.8369	17.4337
G4M1K6	tr|G4M1K6|G4M1K6_SCHMA Pyridoxamine 5-phosphate oxidase OS=Schistosoma mansoni GN=Smp_051550.1 PE=3 SV=1	10	28.877	-0.00279314	21.7301	21.6672	21.604	21.6671	21.5424	21.7528	21.7145	21.6699
G4M1K9	tr|G4M1K9|G4M1K9_SCHMA Acetyltransferase component of pyruvate dehydrogenase complex OS=Schistosoma mansoni GN=Smp_212190 PE=3 SV=1	11	54.382	-0.490585	22.2522	22.2137	22.4843	22.3168	22.7268	22.8271	22.8682	22.8073
G4M1L1	tr|G4M1L1|G4M1L1_SCHMA Vesicular amine transporter, putative OS=Schistosoma mansoni GN=Smp_199260 PE=3 SV=1	5	149.99	-0.833281	17.7308	17.545	16.4035	17.2264	17.7964	18.038	18.3446	18.0597
G4M1L7	tr|G4M1L7|G4M1L7_SCHMA p25-alpha domain containing protein OS=Schistosoma mansoni GN=Smp_194880 PE=4 SV=1	4	12.813	0.276424	18.276	19.9873	19.2557	19.173	19.0915	19.148	18.4501	18.8965
G4M1L8	tr|G4M1L8|G4M1L8_SCHMA Uncharacterized protein (Fragment) OS=Schistosoma mansoni GN=Smp_125710 PE=4 SV=1	1	5.365	0.497357	22.0398	21.2635	21.5882	21.6305	21.1724	21.3499	20.8771	21.1331
G4M1M7	tr|G4M1M7|G4M1M7_SCHMA Uncharacterized protein OS=Schistosoma mansoni GN=Smp_124760 PE=4 SV=1	7	161.52	2.20876	17.4707	17.5825	17.4293	17.4942	15.2854			15.2854
G4M1N4	tr|G4M1N4|G4M1N4_SCHMA Chromatin-specific transcription elongation factor 140 kDa subunit (M24 family) OS=Schistosoma mansoni GN=Smp_212220 PE=4 SV=1	2	82.227	1.56602	17.0284	16.5019	17.164	16.8981	15.6162	14.4448	15.9352	15.3321
G4M1N6	tr|G4M1N6|G4M1N6_SCHMA Tropomyosin, putative OS=Schistosoma mansoni GN=Smp_022170 PE=4 SV=1	5	28.423	-0.370373	20.8527	20.4935	20.7929	20.713	21.043	21.0212	21.1861	21.0834
G4M1R0	tr|G4M1R0|G4M1R0_SCHMA Plasma membrane calcium-transporting atpase,putative OS=Schistosoma mansoni GN=Smp_176130 PE=4 SV=1	2	5.3159	1.08965	21.9092	21.7364	22.229	21.9582	20.936	20.6648	21.0047	20.8685
G4M1S7	tr|G4M1S7|G4M1S7_SCHMA Myosin regulatory light chain 2 smooth muscle,putative OS=Schistosoma mansoni GN=Smp_199400 PE=4 SV=1	3	19.593	-0.610274	19.9403	21.4099	20.9019	20.7507	21.2239	21.4455	21.4135	21.361
G4M1T0	tr|G4M1T0|G4M1T0_SCHMA Nebula, putative OS=Schistosoma mansoni GN=Smp_102960 PE=4 SV=1	5	40.432	-0.886824	17.7147	18.8548	18.2873	18.2856	19.1493	19.0875	19.2804	19.1724
G4M1T7	tr|G4M1T7|G4M1T7_SCHMA 26S proteasome non-ATPase regulatory subunit,putative OS=Schistosoma mansoni GN=Smp_047740 PE=4 SV=1	12	30.945	0.0398998	20.876	21.1447	21.0401	21.0203	20.8621	21.0688	21.0102	20.9804
G4M1U8;G4M1U7	tr|G4M1U8|G4M1U8_SCHMA Voltage-dependent anion-selective channel,putative OS=Schistosoma mansoni GN=Smp_091240.1 PE=4 SV=1;tr|G4M1U7|G4M1U7_SCHMA Voltage-dependent anion-selective channel,putative OS=Schistosoma mansoni GN=Smp_091240.2 PE=4 SV=1	18	31.332	-0.771122	25.3277	25.6346	25.4106	25.4576	26.105	26.2665	26.3147	26.2287
G4M1X2	tr|G4M1X2|G4M1X2_SCHMA Lanc-like protein (Fragment) OS=Schistosoma mansoni GN=Smp_118820 PE=4 SV=1	3	11.962	-0.104809	20.9567	20.2716	20.7748	20.6677	20.7507	21.0012	20.5656	20.7725
G4M1X6;G4M1X7;C4QU84	tr|G4M1X6|G4M1X6_SCHMA Uncharacterized protein OS=Schistosoma mansoni GN=Smp_120640.3 PE=4 SV=1;tr|G4M1X7|G4M1X7_SCHMA Uncharacterized protein OS=Schistosoma mansoni GN=Smp_120640.2 PE=4 SV=1;tr|C4QU84|C4QU84_SCHMA Uncharacterized protein OS=Schistosoma ma	2	59.958	0.192425		16.5408		16.5408	15.6601	16.8125	16.5724	16.3483
G4M201	tr|G4M201|G4M201_SCHMA Stromal cell-derived factor 2-like protein OS=Schistosoma mansoni GN=Smp_199700 PE=4 SV=1	4	17.584	-0.0729958	20.7706	21.3012		21.0359	20.7199	21.2265	21.3803	21.1089
G4M207	tr|G4M207|G4M207_SCHMA Rab6-interacting protein 2/elks/erc/cast,putative OS=Schistosoma mansoni GN=Smp_165890 PE=4 SV=1	7	57.547	0.111898	17.5611	19.3133	18.9254	18.5999	19.4012	17.0246	19.0382	18.488
G4M234	tr|G4M234|G4M234_SCHMA Uncharacterized protein OS=Schistosoma mansoni GN=Smp_205720 PE=4 SV=1	2	7.731	-0.628773	22.2081	21.8863	22.5874	22.2273	22.8887	23.1002	22.5793	22.8561
G4M238	tr|G4M238|G4M238_SCHMA 6-phosphogluconate dehydrogenase,putative OS=Schistosoma mansoni GN=Smp_199860 PE=4 SV=1	2	17.565	0.70489	22.015	19.9569		20.9859	19.3547	22.1405	19.3479	20.281
G4M276	tr|G4M276|G4M276_SCHMA Uncharacterized protein OS=Schistosoma mansoni GN=Smp_206010 PE=4 SV=1	3	34.816	0.312332	18.5405	19.5192	19.6131	19.2243	18.7893	18.961	18.9855	18.9119
G4V5D9	tr|G4V5D9|G4V5D9_SCHMA Defective in cullin neddylation protein OS=Schistosoma mansoni GN=Smp_105330 PE=4 SV=1	2	31.045	-0.172523	19.1506	19.039	17.7767	18.6554	18.578	18.8012	19.1046	18.828
G4V5E4	tr|G4V5E4|G4V5E4_SCHMA Uncharacterized protein OS=Schistosoma mansoni GN=Smp_181050 PE=4 SV=1	26	117.03	-0.0708058	20.5996	21.0051	20.042	20.5489	20.7631	20.4462	20.6497	20.6197
G4V5E6	tr|G4V5E6|G4V5E6_SCHMA Fragile X related 2, frx2 OS=Schistosoma mansoni GN=Smp_016050 PE=4 SV=1	10	86.547	-0.721454	19.3494	18.1517	19.2299	18.9103	19.8615	19.3111	19.7228	19.6318
G4V5F5;G4V5F4;G4V5F6	tr|G4V5F5|G4V5F5_SCHMA Putative flotillin-1 OS=Schistosoma mansoni GN=Smp_016200.3 PE=4 SV=1;tr|G4V5F4|G4V5F4_SCHMA Putative flotillin-1 OS=Schistosoma mansoni GN=Smp_016200.1 PE=4 SV=1;tr|G4V5F6|G4V5F6_SCHMA Putative flotillin-1 OS=Schistosoma mansoni GN=	11	46.559	0.473822	20.2488	20.3121	20.6263	20.3958	19.5711	20.1001	20.0946	19.9219
G4V5G7	tr|G4V5G7|G4V5G7_SCHMA Glycogenin-related OS=Schistosoma mansoni GN=Smp_008490 PE=4 SV=1	14	36.51	-1.26256	21.6424	21.2208	21.3525	21.4052	22.373	22.7898	22.8406	22.6678
G4V5I6	tr|G4V5I6|G4V5I6_SCHMA Putative cyclin OS=Schistosoma mansoni GN=Smp_152760 PE=4 SV=1	5	35.532	0.845528	19.3617	19.6449	17.8768	18.9611	17.9594	18.5407	17.8468	18.1156
G4V5I7	tr|G4V5I7|G4V5I7_SCHMA Uncharacterized protein OS=Schistosoma mansoni GN=Smp_056990 PE=4 SV=1	3	43.221	-1.26756	16.4518	17.3132	17.1284	16.9645	18.1411	18.0935	18.4615	18.232
G4V5L4	tr|G4V5L4|G4V5L4_SCHMA Putative chaperonin containing t-complex protein 1, zeta subunit, tcpz OS=Schistosoma mansoni GN=Smp_004990 PE=3 SV=1	20	59.885	0.22367	23.5691	23.4237	23.5717	23.5215	23.2797	23.3432	23.2706	23.2978
G4V5L5	tr|G4V5L5|G4V5L5_SCHMA Uncharacterized protein OS=Schistosoma mansoni GN=Smp_005000 PE=4 SV=1	4	28.081	0.437986	20.0551	19.7443	19.2455	19.6816	19.3407	19.8358	18.5545	19.2437
G4V5M0;G4V5L9	tr|G4V5M0|G4V5M0_SCHMA Putative chromosome region maintenance protein 1/exportin OS=Schistosoma mansoni GN=Smp_124820.1 PE=4 SV=1;tr|G4V5L9|G4V5L9_SCHMA Putative chromosome region maintenance protein 1/exportin OS=Schistosoma mansoni GN=Smp_124820.2 PE=4 S	9	94.869	-0.16299	19.0835	18.8649	17.7518	18.5667	18.822	18.6001	18.7671	18.7297
G4V5M2	tr|G4V5M2|G4V5M2_SCHMA Uncharacterized protein OS=Schistosoma mansoni GN=Smp_005060.1 PE=4 SV=1	4	17.028	0.122373	22.6737	22.4063	22.4405	22.5068	22.1465	22.3479	22.6589	22.3844
G4V5N5	tr|G4V5N5|G4V5N5_SCHMA Putative centrosomal protein of 135 kDa (Cep135 protein) (Centrosomal protein 4) OS=Schistosoma mansoni GN=Smp_151590 PE=4 SV=1	10	73.007	1.79734	18.8158	19.2028	18.8729	18.9638	17.2043	16.6048	17.6903	17.1665
G4V5N6	tr|G4V5N6|G4V5N6_SCHMA Putative pdz domain containing protein OS=Schistosoma mansoni GN=Smp_151580 PE=4 SV=1	2	19.827	3.14095	17.7854	17.7203	18.5723	18.026	14.8851			14.8851
G4V5N8	tr|G4V5N8|G4V5N8_SCHMA Putative DNA replication licensing factor MCM1 OS=Schistosoma mansoni GN=Smp_151560 PE=3 SV=1	1	96.054	0.553741	17.7569	17.2533	18.2364	17.7489	17.3532	17.2342	16.9981	17.1951
G4V5P4;G4V5P5	tr|G4V5P4|G4V5P4_SCHMA Putative 60S ribosomal protein L23 OS=Schistosoma mansoni GN=Smp_007900.2 PE=3 SV=1;tr|G4V5P5|G4V5P5_SCHMA Putative 60S ribosomal protein L23 OS=Schistosoma mansoni GN=Smp_007900.1 PE=3 SV=1	4	12.537	-1.34335	20.7244	19.6396	20.1695	20.1779	21.7572	21.1847	21.6218	21.5212
G4V5P8	tr|G4V5P8|G4V5P8_SCHMA Dihydropyrimidinase related protein-3 (M38 family) OS=Schistosoma mansoni GN=Smp_196810 PE=4 SV=1	6	34.369	-0.785261	20.5547	21.5294	20.4619	20.8487	21.7219	21.6885	21.4915	21.634
G4V5P9	tr|G4V5P9|G4V5P9_SCHMA Uncharacterized protein (Fragment) OS=Schistosoma mansoni GN=Smp_092460 PE=4 SV=1	6	21.823	-0.317307	19.4026	19.1904	18.8783	19.1571	19.8349	19.6815	18.9069	19.4744
G4V5Q1	tr|G4V5Q1|G4V5Q1_SCHMA Putative nadh-plastoquinone oxidoreductase OS=Schistosoma mansoni GN=Smp_092490.1 PE=3 SV=1	4	23.406	-0.238183	21.2099	20.7955	20.7825	20.9293	21.2336	21.2159	21.0529	21.1675
G4V5Q2	tr|G4V5Q2|G4V5Q2_SCHMA Uncharacterized protein OS=Schistosoma mansoni GN=Smp_092500 PE=4 SV=1	3	15.094	-0.00242045	19.4471	19.9081	19.9431	19.7661	20.0672	19.7718	19.4666	19.7685
G4V5Q4	tr|G4V5Q4|G4V5Q4_SCHMA Eukaryotic translation initiation factor 3 subunit A OS=Schistosoma mansoni GN=Smp_001170 PE=3 SV=1	7	121.72	-1.69104	16.5914	15.1931	15.7589	15.8478	18.1317	17.3812	17.1036	17.5388
G4V5Q9	tr|G4V5Q9|G4V5Q9_SCHMA Uncharacterized protein OS=Schistosoma mansoni GN=Smp_001100 PE=4 SV=1	8	78.592	0.0868006	17.7782	18.6405	16.3941	17.6042	16.4987	17.9415	18.1122	17.5174
G4V5R8	tr|G4V5R8|G4V5R8_SCHMA Kinesin heavy chain OS=Schistosoma mansoni GN=Smp_001040 PE=3 SV=1	41	115.09	-0.417758	22.4901	22.5903	21.2248	22.1017	22.5144	22.429	22.6151	22.5195
G4V5R9	tr|G4V5R9|G4V5R9_SCHMA 5-amp-activated protein kinase gamma-2 non-catalytic subunit transcript variant 2 OS=Schistosoma mansoni GN=Smp_001030 PE=4 SV=1	4	32.155	-0.0864544	18.8934	19.1308	18.1727	18.7323	18.8301	18.6802	18.9459	18.8187
G4V5S1	tr|G4V5S1|G4V5S1_SCHMA Uncharacterized protein Smp_200240 OS=Schistosoma mansoni GN=Smp_200240 PE=4 SV=1	6	19.456	-0.701612	24.5641	24.5121	23.7327	24.2696	24.9398	25.1413	24.8326	24.9712
G4V5S2	tr|G4V5S2|G4V5S2_SCHMA Uncharacterized protein OS=Schistosoma mansoni GN=Smp_001000 PE=4 SV=1	3	19.332	-1.2362	21.4785	21.1416	19.7064	20.7755	22.0596	21.4334	22.5421	22.0117
G4V5T8	tr|G4V5T8|G4V5T8_SCHMA Mannose-6-phosphate isomerase OS=Schistosoma mansoni GN=Smp_089590 PE=3 SV=1	16	53.364	-0.0296067	21.5625	21.7622	21.9521	21.7589	21.7165	21.9122	21.7369	21.7885
G4V5U3;G4V5U2	tr|G4V5U3|G4V5U3_SCHMA Succinate dehydrogenase [ubiquinone] iron-sulfur subunit, mitochondrial OS=Schistosoma mansoni GN=Smp_089640.2 PE=3 SV=1;tr|G4V5U2|G4V5U2_SCHMA Succinate dehydrogenase [ubiquinone] iron-sulfur subunit, mitochondrial OS=Schistosoma ma	14	32.268	-0.283521	24.0976	23.9976	23.6879	23.9277	24.05	24.3531	24.2306	24.2112
G4V5U5	tr|G4V5U5|G4V5U5_SCHMA Putative macroglobulin/complement OS=Schistosoma mansoni GN=Smp_089670 PE=4 SV=1	29	229.89	0.734008	20.5529	20.7405	21.0698	20.7877	20.4126	19.9262	19.8224	20.0537
G4V5V7	tr|G4V5V7|G4V5V7_SCHMA Putative tubulin-specific chaperone B (Tubulin folding cofactor B) OS=Schistosoma mansoni GN=Smp_055400 PE=4 SV=1	4	27.62	0.209381	19.528	18.8918	19.3134	19.2444	18.4136	19.331	19.3603	19.035
G4V5W4	tr|G4V5W4|G4V5W4_SCHMA Uncharacterized protein OS=Schistosoma mansoni GN=Smp_055450 PE=4 SV=1	2	18.377	0.364519	19.2764	20.1154	18.5611	19.3177	18.7447	18.8643	19.2505	18.9532
G4V5Y0	tr|G4V5Y0|G4V5Y0_SCHMA Isocitrate dehydrogenase [NAD] subunit, mitochondrial OS=Schistosoma mansoni GN=Smp_056200 PE=3 SV=1	8	43.546	-0.74153	21.1993	20.8696	21.2202	21.0964	21.6533	21.9087	21.9517	21.8379
G4V5Z8	tr|G4V5Z8|G4V5Z8_SCHMA Uncharacterized protein OS=Schistosoma mansoni GN=Smp_005180 PE=4 SV=1	6	57.872	-0.315205	18.726	19.2977	19.0028	19.0088	19.3737	19.209	19.3894	19.324
G4V604;A5H658	tr|G4V604|G4V604_SCHMA Histone deacetylase OS=Schistosoma mansoni GN=Smp_005210 PE=3 SV=1;tr|A5H658|A5H658_SCHMA Histone deacetylase OS=Schistosoma mansoni GN=HDAC1 PE=2 SV=1	4	52.499	0.262549	18.4143	18.6671	17.952	18.3444	18.1118	18.2228	17.9111	18.0819
G4V605	tr|G4V605|G4V605_SCHMA Putative 40s ribosomal protein S5 OS=Schistosoma mansoni GN=Smp_093440 PE=3 SV=1	4	21.755	-0.274767	20.1408	18.0555	20.5218	19.5727	20.0222	19.8385	19.6816	19.8474
G4V610;G4V609;G4V611	tr|G4V610|G4V610_SCHMA EF hand containing protein OS=Schistosoma mansoni GN=Smp_005230.3 PE=4 SV=1;tr|G4V609|G4V609_SCHMA Putative ef hand containing protein OS=Schistosoma mansoni GN=Smp_005230.1 PE=4 SV=1;tr|G4V611|G4V611_SCHMA EF hand containing protein	6	26.72	-1.82217	16.9678	19.8509	19.8777	18.8988	20.7279	20.6313	20.8037	20.721
G4V612	tr|G4V612|G4V612_SCHMA Stoned-related OS=Schistosoma mansoni GN=Smp_124910 PE=4 SV=1	3	240.96	-0.136245		15.8666	15.9494	15.908	16.0388	15.5625	16.5314	16.0442
G4V613	tr|G4V613|G4V613_SCHMA Putative endoplasmic reticulum oxidoreductin 1 (ERO1) OS=Schistosoma mansoni GN=Smp_124920 PE=4 SV=1	8	47.492	-0.304731	19.5686	19.4211	19.3886	19.4594	19.8573	19.7113	19.7239	19.7642
G4V622	tr|G4V622|G4V622_SCHMA Optic atrophy 1-like protein, opa1 OS=Schistosoma mansoni GN=Smp_028120 PE=3 SV=1	13	101.18	-1.02186	18.0926	18.5354	17.6095	18.0792	19.1928	18.9183	19.1921	19.101
G4V624;G4V625	tr|G4V624|G4V624_SCHMA Putative ubiquitin-conjugating enzyme E2 G OS=Schistosoma mansoni GN=Smp_028100.1 PE=3 SV=1;tr|G4V625|G4V625_SCHMA Putative ubiquitin-conjugating enzyme E2 G OS=Schistosoma mansoni GN=Smp_028100.2 PE=3 SV=1	4	19.28	-0.65158	20.3382	20.4604	19.5089	20.1025	20.6381	20.9808	20.6433	20.7541
G4V630;G4V629	tr|G4V630|G4V630_SCHMA Bicaudal D-like protein OS=Schistosoma mansoni GN=Smp_028070.2 PE=4 SV=1;tr|G4V629|G4V629_SCHMA Bicaudal D-like protein OS=Schistosoma mansoni GN=Smp_028070.1 PE=4 SV=1	6	104.06	-1.68236	15.2178	16.6785		15.9482	17.9854	17.3119	17.5943	17.6305
G4V642	tr|G4V642|G4V642_SCHMA Nuclear pore membrane glycoprotein gp210-related OS=Schistosoma mansoni GN=Smp_142550 PE=4 SV=1	8	244.33	0.842639	11.7232	14.2506	15.175	13.7163	12.9031	12.0223	13.6955	12.8736
G4V651	tr|G4V651|G4V651_SCHMA Guanylate cyclase OS=Schistosoma mansoni GN=Smp_142620 PE=3 SV=1	2	177.96	0.303974			14.4296	14.4296	15.3944	13.3557	13.6268	14.1257
G4V653	tr|G4V653|G4V653_SCHMA Putative talin 2 OS=Schistosoma mansoni GN=Smp_142630 PE=4 SV=1	65	235.41	-0.186742	21.7978	21.4889	21.5956	21.6275	21.9059	21.6188	21.9179	21.8142
G4V654	tr|G4V654|G4V654_SCHMA Putative talin OS=Schistosoma mansoni GN=Smp_037860 PE=4 SV=1	16	60.534	-0.165213	20.5081	20.338	20.263	20.3697	20.8021	20.2926	20.51	20.5349
G4V655	tr|G4V655|G4V655_SCHMA NAD(P)H-hydrate epimerase OS=Schistosoma mansoni GN=Smp_142640 PE=3 SV=1	2	27.042	-1.98001		18.2146	17.9799	18.0972	20.0742	20.3917	19.7659	20.0772
G4V664;G4V663	tr|G4V664|G4V664_SCHMA Similar to TatD DNAse domain containing 1 OS=Schistosoma mansoni GN=Smp_000810.1 PE=4 SV=1;tr|G4V663|G4V663_SCHMA Tatd DNAse-related OS=Schistosoma mansoni GN=Smp_000810.2 PE=4 SV=1	2	34.222	-0.317905	16.3963	17.0445	16.3571	16.5993	17.451	16.0418	17.2588	16.9172
G4V669	tr|G4V669|G4V669_SCHMA Family M13 non-peptidase homologue (M13 family) OS=Schistosoma mansoni GN=Smp_000755 PE=4 SV=1	15	92.819	-0.719173	21.4238	21.5911	19.7855	20.9335	21.4758	21.5756	21.9065	21.6526
G4V672	tr|G4V672|G4V672_SCHMA Putative f1 OS=Schistosoma mansoni GN=Smp_194170 PE=4 SV=1	5	13.523	-1.01626	21.6654	21.7479	20.4309	21.2814	22.2241	22.2609	22.4079	22.2976
G4V678	tr|G4V678|G4V678_SCHMA Protein kinase OS=Schistosoma mansoni GN=Smp_176440 PE=4 SV=1	6	92.392	-2.34989	13.4493	15.4804	15.4861	14.8053	17.5039	16.5317	17.4299	17.1552
G4V683	tr|G4V683|G4V683_SCHMA Serine/threonine kinase OS=Schistosoma mansoni GN=Smp_098840 PE=3 SV=1	5	49.25	-1.00363	19.0975	18.9375	19.4192	19.1514	20.0952	20.1123	20.2577	20.155
G4V686	tr|G4V686|G4V686_SCHMA Putative propionyl-CoA carboxylase beta chain,mitochondrial OS=Schistosoma mansoni GN=Smp_163230 PE=4 SV=1	3	60.271	-1.91345		14.4977	16.4025	15.4501	17.6958	17.002	17.393	17.3636
G4V688	tr|G4V688|G4V688_SCHMA Putative WD-repeat protein OS=Schistosoma mansoni GN=Smp_163210 PE=4 SV=1	16	89.543	-0.520261	20.1732	20.2376	20.0954	20.1687	20.3217	20.8906	20.8547	20.689
G4V697	tr|G4V697|G4V697_SCHMA Putative collagen alpha chain OS=Schistosoma mansoni GN=Smp_159600 PE=3 SV=1	5	159.24	-0.114369	17.6605	17.6004	17.9971	17.7527	18.277	17.3467	17.9774	17.867
G4V698	tr|G4V698|G4V698_SCHMA Putative malate dehydrogenase OS=Schistosoma mansoni GN=Smp_129610 PE=4 SV=1	3	41.758	-1.32065		15.4291	16.748	16.0885	16.879	17.4844	17.8641	17.4092
G4V6A5	tr|G4V6A5|G4V6A5_SCHMA Uncharacterized protein OS=Schistosoma mansoni GN=Smp_013690 PE=4 SV=1	8	48.04	-0.16071	20.0311	20.6976	20.4484	20.3924	20.4647	20.6015	20.5931	20.5531
G4V6B1	tr|G4V6B1|G4V6B1_SCHMA Putative mitochondrial 2-oxoglutarate/malate carrier protein OS=Schistosoma mansoni GN=Smp_004080 PE=3 SV=1	3	34.372	0.328912	14.7831		17.9873	16.3852	17.0264	14.652	16.4907	16.0563
G4V6B2	tr|G4V6B2|G4V6B2_SCHMA Carbonic anhydrase OS=Schistosoma mansoni GN=Smp_004070 PE=3 SV=1	2	27.699	0.518442	17.5234	17.465	18.3581	17.7822	17.2104	17.3171		17.2637
G4V6B6	tr|G4V6B6|G4V6B6_SCHMA Putative chromosome transmission fidelity factor OS=Schistosoma mansoni GN=Smp_004020 PE=4 SV=1	4	154.55	-1.09287	14.7938	15.26	14.3078	14.7872	15.4778	15.9426	16.2198	15.8801
G4V6B9;P48501	tr|G4V6B9|G4V6B9_SCHMA Triosephosphate isomerase OS=Schistosoma mansoni GN=Smp_003990 PE=1 SV=1;sp|P48501|TPIS_SCHMA Triosephosphate isomerase OS=Schistosoma mansoni GN=TPI PE=1 SV=1	18	28.094	-0.367808	26.7931	26.6954	26.6854	26.7247	27.0638	27.2056	27.008	27.0925
G4V6C0	tr|G4V6C0|G4V6C0_SCHMA Family C2 unassigned peptidase (C02 family) OS=Schistosoma mansoni GN=Smp_003980 PE=3 SV=1	5	81.782	-0.0260514	18.2933	18.5028	18.5409	18.4457	18.4615	18.289	18.6647	18.4717
G4V6C2	tr|G4V6C2|G4V6C2_SCHMA Putative elongation factor-1 beta,delta OS=Schistosoma mansoni GN=Smp_003970 PE=4 SV=1	8	26.66	-0.14727	23.13	22.9511	22.6299	22.9037	22.9471	23.2307	22.975	23.0509
G4V6D5	tr|G4V6D5|G4V6D5_SCHMA Succinate dehydrogenase [ubiquinone] cytochrome b small subunit OS=Schistosoma mansoni GN=Smp_037910 PE=3 SV=1	2	17.285	-0.315343	21.2365	20.9064	20.9282	21.0237	21.5861	21.1115	21.3196	21.3391
G4V6D6	tr|G4V6D6|G4V6D6_SCHMA Uncharacterized protein OS=Schistosoma mansoni GN=Smp_084620 PE=4 SV=1	3	13.112	-1.13729	17.3903	21.2188	19.9631	19.5241	20.0007	21.1558	20.8276	20.6614
G4V6D7	tr|G4V6D7|G4V6D7_SCHMA Fas-associated factor-related OS=Schistosoma mansoni GN=Smp_084610 PE=4 SV=1	3	58.647	0.121404	17.0859		17.3137	17.1998	17.6863	17.1553	16.3936	17.0784
G4V6E9;C1M1H8;G4VL73	tr|G4V6E9|G4V6E9_SCHMA Histone H2B OS=Schistosoma mansoni GN=Smp_036220 PE=3 SV=1;tr|C1M1H8|C1M1H8_SCHMA Histone H2B OS=Schistosoma mansoni GN=Smp_108390 PE=3 SV=1;tr|G4VL73|G4VL73_SCHMA Putative histone H2B OS=Schistosoma mansoni GN=Smp_077790 PE=3 SV=1	6	13.577	1.65231	25.3775	23.7704	25.0727	24.7402	23.796	22.8145	22.6531	23.0879
G4V6F4;G4V6F5;G4V6F7;G4V6F6	tr|G4V6F4|G4V6F4_SCHMA Putative arginine/serine-rich splicing factor OS=Schistosoma mansoni GN=Smp_036270.10 PE=4 SV=1;tr|G4V6F5|G4V6F5_SCHMA Putative arginine/serine-rich splicing factor OS=Schistosoma mansoni GN=Smp_036270.2 PE=4 SV=1;tr|G4V6F7|G4V6F7_SC	3	41.896	-0.0333929	19.6051	19.7468	19.7237	19.6918	19.6765	19.5599	19.9393	19.7252
G4V6G9	tr|G4V6G9|G4V6G9_SCHMA Putative titin OS=Schistosoma mansoni GN=Smp_105020 PE=4 SV=1	15	83.179	-0.340082	23.7481	23.8151	23.4585	23.6739	23.9654	24.0791	23.9974	24.014
G4V6H2	tr|G4V6H2|G4V6H2_SCHMA Putative nocturnin OS=Schistosoma mansoni GN=Smp_105040 PE=4 SV=1	7	38.874	-0.556699	18.8502	18.4994	18.81	18.7198	19.1896	19.685	18.9551	19.2765
G4V6J3	tr|G4V6J3|G4V6J3_SCHMA Coatomer subunit gamma OS=Schistosoma mansoni GN=Smp_092770 PE=3 SV=1	18	101.22	-0.327416	19.556	19.0805	19.9357	19.5241	20.2074	19.1078	20.2394	19.8515
G4V6J4	tr|G4V6J4|G4V6J4_SCHMA ATPase ASNA1 homolog OS=Schistosoma mansoni GN=Smp_210810 PE=3 SV=1	6	42.869	-0.103982	20.5867	20.4363	20.7831	20.602	20.4717	20.8085	20.8379	20.706
G4V6J5	tr|G4V6J5|G4V6J5_SCHMA G protein-coupled receptor kinase OS=Schistosoma mansoni GN=Smp_210820 PE=3 SV=1	12	86.485	-0.630722	17.8707	18.3662	17.9636	18.0668	18.4871	18.7522	18.8533	18.6975
G4V6K8	tr|G4V6K8|G4V6K8_SCHMA Putative histone h1/h5 OS=Schistosoma mansoni GN=Smp_003770 PE=3 SV=1	1	20.446	1.70119	21.2995	21.2649	22.0711	21.5452	20.2427	19.8019	19.4874	19.844
G4V6L7	tr|G4V6L7|G4V6L7_SCHMA Putative dead box ATP-dependent RNA helicase OS=Schistosoma mansoni GN=Smp_003660 PE=4 SV=1	11	49.088	0.855371	21.947	21.9464	21.8796	21.9243	21.3446	20.9367	20.9256	21.069
G4V6M0	tr|G4V6M0|G4V6M0_SCHMA Putative splicing factor 3a OS=Schistosoma mansoni GN=Smp_003630 PE=4 SV=1	5	59.673	-0.751059	17.4851	16.6736	15.739	16.6326	17.3454	17.7569	17.0487	17.3837
G4V6M3;G4V6M2	tr|G4V6M3|G4V6M3_SCHMA Uncharacterized protein OS=Schistosoma mansoni GN=Smp_003610.2 PE=4 SV=1;tr|G4V6M2|G4V6M2_SCHMA Uncharacterized protein OS=Schistosoma mansoni GN=Smp_003610.1 PE=4 SV=1	5	17.621	-0.58751	21.9232	21.391	21.1978	21.504	22.1254	22.0703	22.0788	22.0915
G4V6M6	tr|G4V6M6|G4V6M6_SCHMA Uncharacterized protein OS=Schistosoma mansoni GN=Smp_124100 PE=4 SV=1	1	104.44	-2.94361	13.7032	15.4065		14.5549	15.8924	18.0288	18.5743	17.4985
G4V6M9	tr|G4V6M9|G4V6M9_SCHMA Venom allergen-like (VAL) 16 protein OS=Schistosoma mansoni GN=Smp_124070 PE=3 SV=1	2	15.873	-0.562933	18.721	18.9541	18.3511	18.6754	18.509	19.6343	19.5716	19.2383
G4V6P1	tr|G4V6P1|G4V6P1_SCHMA Uncharacterized protein Smp_200330 OS=Schistosoma mansoni GN=Smp_200330 PE=4 SV=1	6	28.21	-0.850303	20.2004	19.9182	19.769	19.9626	20.9296	20.6883	20.8206	20.8129
G4V6P2	tr|G4V6P2|G4V6P2_SCHMA Putative threonyl-tRNA synthetase OS=Schistosoma mansoni GN=Smp_123990 PE=4 SV=1	10	46.402	-0.466635	21.3234	21.3356	20.5813	21.0801	21.3579	21.552	21.7303	21.5467
G4V6P4	tr|G4V6P4|G4V6P4_SCHMA Putative 60s ribosomal protein L23a OS=Schistosoma mansoni GN=Smp_003410 PE=3 SV=1	5	22.008	-0.331804	21.9326	20.8843	21.9347	21.5838	22.2939	21.8206	21.6324	21.9156
G4V6P6	tr|G4V6P6|G4V6P6_SCHMA Serine/threonine kinase OS=Schistosoma mansoni GN=Smp_068060.1 PE=4 SV=1	3	114.55	-0.0533063	19.9839	20.2888	20.2661	20.1796	20.0232	20.2371	20.4384	20.2329
G4V6P7	tr|G4V6P7|G4V6P7_SCHMA Uncharacterized protein OS=Schistosoma mansoni GN=Smp_068070 PE=4 SV=1	15	68.707	0.511108	19.8615	20.1088	19.9966	19.9889	19.3502	19.6071	19.4762	19.4778
G4V6R4	tr|G4V6R4|G4V6R4_SCHMA Putative rab9 and OS=Schistosoma mansoni GN=Smp_067140 PE=4 SV=1	8	23.309	0.151772	21.7204	21.5979	20.9256	21.4146	21.1811	21.0672	21.5403	21.2628
G4V6S0	tr|G4V6S0|G4V6S0_SCHMA Eukaryotic translation initiation factor 3 subunit H OS=Schistosoma mansoni GN=Smp_210570 PE=3 SV=1	4	38.956	-0.135515	19.8594	19.6767	19.6154	19.7172	19.7905	19.8332	19.9343	19.8527
G4V6S8	tr|G4V6S8|G4V6S8_SCHMA Uncharacterized protein OS=Schistosoma mansoni GN=Smp_196840 PE=4 SV=1	4	152.83	1.90804	16.9269	16.9005	16.4714	16.7663	15.3137	13.7519	15.509	14.8582
G4V6T2	tr|G4V6T2|G4V6T2_SCHMA Putative cystathionine beta-lyase OS=Schistosoma mansoni GN=Smp_083650 PE=3 SV=1	2	46.42	-0.572098		16.8694	16.3354	16.6024	17.5222	17.1837	16.8176	17.1745
G4V6T6	tr|G4V6T6|G4V6T6_SCHMA Putative mitochondrial phosphate carrier protein OS=Schistosoma mansoni GN=Smp_083720 PE=3 SV=1	9	34.899	-0.432503	21.6131	20.8226	21.8546	21.4301	22.3465	21.2194	22.0219	21.8626
G4V6T7;G4V6T8	tr|G4V6T7|G4V6T7_SCHMA Uncharacterized protein OS=Schistosoma mansoni GN=Smp_083730.1 PE=4 SV=1;tr|G4V6T8|G4V6T8_SCHMA Uncharacterized protein OS=Schistosoma mansoni GN=Smp_083730.2 PE=4 SV=1	4	32.109	-1.04974	21.5407	21.6007	21.1647	21.4354	22.1431	22.7285	22.5838	22.4851
G4V6U4	tr|G4V6U4|G4V6U4_SCHMA Uncharacterized protein OS=Schistosoma mansoni GN=Smp_083800 PE=4 SV=1	4	22.981	F only	19.7752	19.7702	20.521	20.0221				N/A
G4V6X0_SCHMASynaptobrevin,putative	tr|G4V6X0|G4V6X0_SCHMA Synaptobrevin, putative|Pfam:PF00957 OS=Schistosoma mansoni GN=Smp_123870 PE=4 SV=1	4	18.193	-0.256662	22.3285	21.9242	21.901	22.0512	22.7105	22.1111	22.1021	22.3079
G4V6X1	tr|G4V6X1|G4V6X1_SCHMA Sh3 domain grb2-like protein B1 (Endophilin B1) OS=Schistosoma mansoni GN=Smp_003230 PE=4 SV=1	16	28.304	1.96035	26.1772	26.1693	26.1162	26.1542	24.1946	24.2485	24.1385	24.1939
G4V6X6	tr|G4V6X6|G4V6X6_SCHMA Putative collagen alpha-1(V) chain OS=Schistosoma mansoni GN=Smp_123830 PE=4 SV=1	1	160.77	1.09606	14.4122	15.3265	15.0701	14.9362		13.6741	14.0062	13.8402
G4V6X9	tr|G4V6X9|G4V6X9_SCHMA Putative sorting nexin OS=Schistosoma mansoni GN=Smp_003140.1 PE=4 SV=1	15	43.095	0.605615	21.2729	21.3689	21.4899	21.3772	20.4751	20.8387	21.0009	20.7716
G4V6Y4;G4V6Y3	tr|G4V6Y4|G4V6Y4_SCHMA Nadrin-like protein OS=Schistosoma mansoni GN=Smp_003110.2 PE=4 SV=1;tr|G4V6Y3|G4V6Y3_SCHMA Nadrin-like protein OS=Schistosoma mansoni GN=Smp_003110.1 PE=4 SV=1	4	27.203	-0.133671	22.1978	22.4999	22.0671	22.2549	22.5159	22.5168	22.1331	22.3886
G4V6Y5	tr|G4V6Y5|G4V6Y5_SCHMA Kettin/titin-related protein OS=Schistosoma mansoni GN=Smp_197080 PE=4 SV=1	16	89.738	-0.541545	23.3731	23.4127	22.95	23.2453	23.824	23.8819	23.6546	23.7868
G4V6Y7	tr|G4V6Y7|G4V6Y7_SCHMA Putative kynurenine aminotransferase OS=Schistosoma mansoni GN=Smp_123750 PE=4 SV=1	14	110.87	-0.190402	20.7778	20.6072	20.838	20.741	20.9646	20.9345	20.8951	20.9314
G4V6Y8	tr|G4V6Y8|G4V6Y8_SCHMA Uncharacterized protein Smp_200440 OS=Schistosoma mansoni GN=Smp_200440 PE=4 SV=1	3	18.261	-0.255734	19.457	17.9299	18.4276	18.6048	19.4019	19.1175	18.0623	18.8606
G4V6Z5	tr|G4V6Z5|G4V6Z5_SCHMA Transmembrane 9 superfamily member OS=Schistosoma mansoni GN=Smp_162040 PE=3 SV=1	3	32.799	-0.0257761	18.4019	17.3051	19.2701	18.3257	18.0168		18.6862	18.3515
G4V6Z7	tr|G4V6Z7|G4V6Z7_SCHMA Actin-related protein 2/3 complex subunit 5 OS=Schistosoma mansoni GN=Smp_073720.1 PE=3 SV=1	4	17.345	-0.621894	21.5816	21.9969	21.902	21.8268	22.3078	22.6402	22.3981	22.4487
G4V705	tr|G4V705|G4V705_SCHMA Putative methionyl-tRNA synthetase OS=Schistosoma mansoni GN=Smp_073620 PE=4 SV=1	15	32.899	-0.205798	22.8339	22.7621	22.687	22.761	22.7565	23.1727	22.9713	22.9668
G4V708	tr|G4V708|G4V708_SCHMA Putative platelet-activating factor acetylhydrolase ib OS=Schistosoma mansoni GN=Smp_073600 PE=4 SV=1	7	25.199	-0.225094	22.3144	22.1338	22.069	22.1724	22.3778	22.4399	22.3748	22.3975
G4V709	tr|G4V709|G4V709_SCHMA GTP-binding protein-like protein OS=Schistosoma mansoni GN=Smp_073590 PE=3 SV=1	8	22.5	-0.469223	22.3627	22.8852	22.416	22.5547	22.853	23.1474	23.0713	23.0239
G4V713	tr|G4V713|G4V713_SCHMA Putative eukaryotictranslation initiation factor 3 subunit OS=Schistosoma mansoni GN=Smp_006000 PE=4 SV=1	4	27.434	0.676359	19.2035	20.3165	20.1119	19.8773	18.9303	19.4331	19.2394	19.2009
G4V714	tr|G4V714|G4V714_SCHMA Putative eukaryotictranslation initiation factor 3 subunit OS=Schistosoma mansoni GN=Smp_101200 PE=4 SV=1	1	13.421	0.156307	18.9551	18.8562	18.3539	18.7217	18.6812	18.5059	18.5092	18.5654
G4V720	tr|G4V720|G4V720_SCHMA RNA helicase OS=Schistosoma mansoni GN=Smp_125330 PE=3 SV=1	2	169.99	-1.76799		15.1958		15.1958	15.0444	20.2177	15.6293	16.9638
G4V721;Q9XYR4	tr|G4V721|G4V721_SCHMA Putative phosphoenolpyruvate carboxykinase OS=Schistosoma mansoni GN=Smp_005880 PE=3 SV=1;tr|Q9XYR4|Q9XYR4_SCHMA Phosphoenolpyruvate carboxykinase OS=Schistosoma mansoni PE=2 SV=1	28	70.39	-0.584373	22.1872	22.418	22.6088	22.4047	23.0067	22.9574	23.0029	22.989
G4V725;G4V724;G4V723	tr|G4V725|G4V725_SCHMA Uncharacterized protein OS=Schistosoma mansoni GN=Smp_005860.1 PE=4 SV=1;tr|G4V724|G4V724_SCHMA Uncharacterized protein OS=Schistosoma mansoni GN=Smp_005860.3 PE=4 SV=1;tr|G4V723|G4V723_SCHMA Uncharacterized protein OS=Schistosoma ma	14	45.153	0.753033	24.4862	23.948	24.662	24.3654	23.6373	23.5405	23.6594	23.6124
G4V734	tr|G4V734|G4V734_SCHMA Putative gtp-binding protein (Q) alpha-11 subunit, gna11 OS=Schistosoma mansoni GN=Smp_005790 PE=4 SV=1	11	41.63	0.365911	22.7762	22.8203	22.6518	22.7495	22.2567	22.4355	22.4584	22.3835
G4V739;C4PYI6	tr|G4V739|G4V739_SCHMA Uncharacterized protein OS=Schistosoma mansoni GN=Smp_125220 PE=4 SV=1;tr|C4PYI6|C4PYI6_SCHMA Aquaporin OS=Schistosoma mansoni GN=AQP1 PE=2 SV=1	1	7.8879	0.623182	21.1106	20.6694	20.6792	20.8197	20.125	20.1224	20.3422	20.1965
G4V740	tr|G4V740|G4V740_SCHMA Putative aquaporin-3 OS=Schistosoma mansoni GN=Smp_005720 PE=3 SV=1	3	33.903	0.908104	22.3691	21.8762	22.6776	22.3076	21.5204	20.9157	21.7625	21.3995
G4V755	tr|G4V755|G4V755_SCHMA Putative clathrin coat assembly protein ap-1 OS=Schistosoma mansoni GN=Smp_064240 PE=3 SV=1	6	48.681	-0.1043	17.9924	18.2109	17.9071	18.0368	17.9243	18.1398	18.3591	18.1411
G4V767	tr|G4V767|G4V767_SCHMA Putative cornichon OS=Schistosoma mansoni GN=Smp_082990 PE=4 SV=1	2	30.101	-0.0925662	18.765	19.237	18.8812	18.9611	19.1691	18.7818	19.21	19.0536
G4V768	tr|G4V768|G4V768_SCHMA Putative wd-repeat protein OS=Schistosoma mansoni GN=Smp_167150 PE=4 SV=1	3	41.983	0.204365	20.0985	20.0715	19.1912	19.7871	19.8324	19.8133	19.1024	19.5827
G4V774	tr|G4V774|G4V774_SCHMA Putative inhibitor of apoptosis (Iap) domain family member OS=Schistosoma mansoni GN=Smp_083030 PE=3 SV=1	5	31.754	0.436836	20.1953	20.4108	20.6445	20.4168	20.1579	20.3995	19.3827	19.98
G4V776;G4V775	tr|G4V776|G4V776_SCHMA Adducin related protein OS=Schistosoma mansoni GN=Smp_083040.2 PE=4 SV=1;tr|G4V775|G4V775_SCHMA Adducin related protein OS=Schistosoma mansoni GN=Smp_083040.1 PE=4 SV=1	14	59.611	-0.12995	22.0267	21.9707	22.2991	22.0988	22.2097	22.1617	22.315	22.2288
G4V779;G4V780	tr|G4V779|G4V779_SCHMA Elongation factor Tu OS=Schistosoma mansoni GN=Smp_073500.1 PE=3 SV=1;tr|G4V780|G4V780_SCHMA Elongation factor Tu OS=Schistosoma mansoni GN=Smp_073500.2 PE=3 SV=1	18	47.457	-0.598546	22.1455	22.2482	22.238	22.2106	22.7087	22.7711	22.9475	22.8091
G4V785	tr|G4V785|G4V785_SCHMA Putative prefoldin subunit OS=Schistosoma mansoni GN=Smp_073540 PE=4 SV=1	5	20.549	-0.495187	20.2244	20.1094	19.0533	19.7957	20.33	20.6767	19.8658	20.2909
G4V790	tr|G4V790|G4V790_SCHMA Deoxyuridine 5-triphosphate nucleotidohydrolase OS=Schistosoma mansoni GN=Smp_079240 PE=4 SV=1	5	16.811	-1.46655	17.9681	17.5635		17.7658	19.0305	19.7695	18.897	19.2323
G4V793;G4V792	tr|G4V793|G4V793_SCHMA GTP-binding nuclear protein OS=Schistosoma mansoni GN=Smp_079430.2 PE=3 SV=1;tr|G4V792|G4V792_SCHMA Putative ran OS=Schistosoma mansoni GN=Smp_079430.1 PE=4 SV=1	9	24.859	0.272771	23.1655	23.4424	22.8494	23.1524	22.6032	23.0705	22.9653	22.8797
G4V7A8	tr|G4V7A8|G4V7A8_SCHMA Transmembrane protein tmp21-related OS=Schistosoma mansoni GN=Smp_079310 PE=3 SV=1	4	24.1	-0.414947	21.7712	22.6277	21.951	22.1166	22.4588	22.9472	22.1887	22.5316
G4V7B4;G4V7B3	tr|G4V7B4|G4V7B4_SCHMA Putative rna binding motif protein 4,lark OS=Schistosoma mansoni GN=Smp_079290.1 PE=4 SV=1;tr|G4V7B3|G4V7B3_SCHMA Putative rna binding motif protein 4,lark OS=Schistosoma mansoni GN=Smp_079290.3 PE=4 SV=1	11	32.245	0.646546	22.373	22.7032	22.3806	22.4856	21.6044	21.821	22.0917	21.8391
G4V7B6	tr|G4V7B6|G4V7B6_SCHMA Crp-related OS=Schistosoma mansoni GN=Smp_079270 PE=4 SV=1	2	8.8783	-0.54442	21.7224	21.8467	21.5914	21.7202	22.2019	22.2993	22.2926	22.2646
G4V7C7	tr|G4V7C7|G4V7C7_SCHMA Uncharacterized protein OS=Schistosoma mansoni GN=Smp_194860 PE=4 SV=1	6	10.866	1.39579	25.3791	25.0453	24.9101	25.1115	23.6619	23.9829	23.5023	23.7157
G4V7D6	tr|G4V7D6|G4V7D6_SCHMA Putative ATPase OS=Schistosoma mansoni GN=Smp_167200 PE=4 SV=1	4	66.115	-1.46623	15.2975	16.6245	17.3065	16.4095	17.8304	17.8901	17.9067	17.8757
G4V7D8;G4V7D7	tr|G4V7D8|G4V7D8_SCHMA Uncharacterized protein OS=Schistosoma mansoni GN=Smp_083080.1 PE=4 SV=1;tr|G4V7D7|G4V7D7_SCHMA Uncharacterized protein OS=Schistosoma mansoni GN=Smp_083080.2 PE=4 SV=1	11	38.515	0.0276711	22.4427	22.4172	22.4682	22.4427	22.3644	22.5156	22.365	22.415
G4V7E5	tr|G4V7E5|G4V7E5_SCHMA Uncharacterized protein OS=Schistosoma mansoni GN=Smp_167230 PE=4 SV=1	8	37.552	-0.412293	19.505	20.5046	19.9597	19.9898	20.3564	20.2216	20.6281	20.4021
G4V7F5;G4V7F4	tr|G4V7F5|G4V7F5_SCHMA Ubiquitin carboxyl-terminal hydrolase OS=Schistosoma mansoni GN=Smp_083200.1 PE=3 SV=1;tr|G4V7F4|G4V7F4_SCHMA Ubiquitin carboxyl-terminal hydrolase OS=Schistosoma mansoni GN=Smp_083200.2 PE=3 SV=1	8	35.659	-0.631007	18.6852	19.696	19.5417	19.3076	19.776	19.9599	20.08	19.9386
G4V7G0	tr|G4V7G0|G4V7G0_SCHMA COP9 signalosome subunit 6 (M67 family) OS=Schistosoma mansoni GN=Smp_126690 PE=4 SV=1	1	35.86	-0.365236	17.7835	17.6711		17.7273	18.0341	18.2221	18.0213	18.0925
G4V7G3	tr|G4V7G3|G4V7G3_SCHMA Proteasome assembly chaperone 2 OS=Schistosoma mansoni GN=Smp_126670 PE=3 SV=1	3	29.848	0.995329	17.8429	18.2128	18.0193	18.025	16.8513	17.2313	17.0064	17.0297
G4V7G8	tr|G4V7G8|G4V7G8_SCHMA Putative adenosine kinase OS=Schistosoma mansoni GN=Smp_008360 PE=1 SV=1	4	39.392	-1.56133	18.1357	18.2537	17.828	18.0725	19.5799	19.7265	19.5951	19.6338
G4V7H0	tr|G4V7H0|G4V7H0_SCHMA Putative pap-inositol-1,4-phosphatase OS=Schistosoma mansoni GN=Smp_008320 PE=4 SV=1	10	35.399	0.229885	21.7086	21.3698	21.5866	21.555	21.4413	21.3374	21.1967	21.3251
G4V7H6	tr|G4V7H6|G4V7H6_SCHMA Putative glycogen synthase kinase 3-related (Gsk3) OS=Schistosoma mansoni GN=Smp_008260 PE=3 SV=1	4	52.711	0.0269106	16.4904	17.6024	17.2472	17.1133	16.8731	17.0772	17.309	17.0864
G4V7H8	tr|G4V7H8|G4V7H8_SCHMA Putative rab-18 OS=Schistosoma mansoni GN=Smp_008230 PE=4 SV=1	4	23.993	0.19899	17.5679	17.4191	18.2811	17.7561		17.3317	17.7824	17.5571
G4V7J0	tr|G4V7J0|G4V7J0_SCHMA Uncharacterized protein OS=Schistosoma mansoni GN=Smp_126540 PE=4 SV=1	32	152.1	0.09156	22.5659	22.3157	22.6714	22.5177	22.2293	22.5082	22.5408	22.4261
G4V7J3	tr|G4V7J3|G4V7J3_SCHMA Putative ubiquitin fusion degradaton protein OS=Schistosoma mansoni GN=Smp_196510 PE=4 SV=1	8	32.844	0.10676	20.1967	20.2086	19.4992	19.9682	19.7827	19.8456	19.9558	19.8614
G4V7J7;G4V7J8;G4V7J9	tr|G4V7J7|G4V7J7_SCHMA V-type proton ATPase subunit a OS=Schistosoma mansoni GN=Smp_040970.1 PE=3 SV=1;tr|G4V7J8|G4V7J8_SCHMA V-type proton ATPase subunit a OS=Schistosoma mansoni GN=Smp_040970.3 PE=3 SV=1;tr|G4V7J9|G4V7J9_SCHMA V-type proton ATPase subuni	12	98.399	0.41524	19.1783	18.7613	19.8999	19.2798	19.0713	18.1792	19.3433	18.8646
G4V7M3;G4V7M2	tr|G4V7M3|G4V7M3_SCHMA Putative propionyl-CoA carboxylase alpha subunit OS=Schistosoma mansoni GN=Smp_165400.1 PE=4 SV=1;tr|G4V7M2|G4V7M2_SCHMA Putative propionyl-CoA carboxylase alpha subunit OS=Schistosoma mansoni GN=Smp_165400.3 PE=4 SV=1	5	102.14	-2.75479		13.6633		13.6633	16.3894	16.399	16.4659	16.4181
G4V7P2;G4V7P3	tr|G4V7P2|G4V7P2_SCHMA Uncharacterized protein OS=Schistosoma mansoni GN=Smp_035560.2 PE=4 SV=1;tr|G4V7P3|G4V7P3_SCHMA Uncharacterized protein OS=Schistosoma mansoni GN=Smp_035560.1 PE=4 SV=1	9	17.557	0.199732	26.342	26.4296	25.854	26.2086	25.8439	26.216	25.9666	26.0088
G4V7P4	tr|G4V7P4|G4V7P4_SCHMA Serine/threonine-protein phosphatase OS=Schistosoma mansoni GN=Smp_035580 PE=3 SV=1	9	36.865	0.216367	19.8622	20.069	21.0461	20.3258	20.0598	20.1209	20.1475	20.1094
G4V7P9	tr|G4V7P9|G4V7P9_SCHMA Uncharacterized protein OS=Schistosoma mansoni GN=Smp_141330 PE=4 SV=1	2	37.405	0.583281	18.0715	17.2373	17.7608	17.6899	16.5044	17.4247	17.3907	17.1066
G4V7Q4	tr|G4V7Q4|G4V7Q4_SCHMA Pyruvate carboxylase OS=Schistosoma mansoni GN=Smp_141360 PE=4 SV=1	36	132.3	-0.614751	21.1686	20.7952	20.749	20.9043	21.8233	21.1975	21.5363	21.519
G4V7Q9	tr|G4V7Q9|G4V7Q9_SCHMA Putative adenosine deaminase OS=Schistosoma mansoni GN=Smp_035700 PE=4 SV=1	7	39.27	F only	19.3638	19.9951	20.3679	19.9089				N/A
G4V7R0	tr|G4V7R0|G4V7R0_SCHMA Innexin OS=Schistosoma mansoni GN=inx PE=3 SV=1	7	49.12	0.637858	19.467	19.5648	19.6565	19.5628	19.0538	18.7004	19.0206	18.9249
G4V7R2;G4V7R4;G4V7R1;G4V7R3	tr|G4V7R2|G4V7R2_SCHMA Innexin OS=Schistosoma mansoni GN=inx PE=3 SV=1;tr|G4V7R4|G4V7R4_SCHMA Innexin OS=Schistosoma mansoni GN=inx PE=3 SV=1;tr|G4V7R1|G4V7R1_SCHMA Innexin OS=Schistosoma mansoni GN=inx PE=3 SV=1;tr|G4V7R3|G4V7R3_SCHMA Innexin OS=Schistoso	17	52.475	-0.661786	22.3569	22.5278	22.7995	22.5614	23.1604	23.0807	23.4285	23.2232
G4V7R9	tr|G4V7R9|G4V7R9_SCHMA Dolichyl-diphosphooligosaccharide--protein glycosyltransferase 48 kDa subunit OS=Schistosoma mansoni GN=Smp_035470 PE=3 SV=1	13	48.681	0.481484	22.1851	22.3945	22.3697	22.3164	21.6407	21.6468	22.2172	21.8349
G4V7S7	tr|G4V7S7|G4V7S7_SCHMA Putative nucleobindin OS=Schistosoma mansoni GN=Smp_144560 PE=4 SV=1	2	43.253	0.763277	17.7489	18.0509	16.4985	17.4328	15.6495		17.6895	16.6695
G4V7U3	tr|G4V7U3|G4V7U3_SCHMA 40S ribosomal protein S8 OS=Schistosoma mansoni GN=Smp_054780 PE=3 SV=1	5	24.857	-0.386294	18.7238	17.6855	19.2794	18.5629	19.3697	18.3032	19.1747	18.9492
G4V7U5;G4V7U4	tr|G4V7U5|G4V7U5_SCHMA Putative microtubule associated protein xmap215 OS=Schistosoma mansoni GN=Smp_054790.1 PE=4 SV=1;tr|G4V7U4|G4V7U4_SCHMA Putative microtubule associated protein xmap215 OS=Schistosoma mansoni GN=Smp_054790.2 PE=4 SV=1	5	214.63	-1.87374	14.308	13.2374	14.6641	14.0698	16.291	16.1333	15.4064	15.9436
G4V7U6	tr|G4V7U6|G4V7U6_SCHMA Related to multifunctional cyclin-dependent kinase-related OS=Schistosoma mansoni GN=Smp_054800 PE=4 SV=1	2	60.599	0.916339	18.0108	17.2717	18.2977	17.8601	17.2886	16.6059	16.9366	16.9437
G4V7W1	tr|G4V7W1|G4V7W1_SCHMA Putative pinch OS=Schistosoma mansoni GN=Smp_165070 PE=4 SV=1	3	18.553	0.434321	19.2263	19.8744	19.8325	19.6444	19.3097	19.0425	19.2781	19.2101
G4V7W2	tr|G4V7W2|G4V7W2_SCHMA Putative chromodomain helicase DNA binding protein OS=Schistosoma mansoni GN=Smp_079650 PE=4 SV=1	2	224.33	-0.907732	17.2319	18.1275	17.4106	17.59	18.3705	18.6231	18.4995	18.4977
G4V7X4	tr|G4V7X4|G4V7X4_SCHMA Putative ctl2 OS=Schistosoma mansoni GN=Smp_160740 PE=3 SV=1	9	64.916	0.311923	19.8043	19.5674	19.6421	19.6713	19.3411	18.8476	19.8893	19.3593
G4V7X6	tr|G4V7X6|G4V7X6_SCHMA Serine/threonine kinase OS=Schistosoma mansoni GN=Smp_160760 PE=4 SV=1	7	120.98	-0.124706	17.3365	17.4312	17.4458	17.4045	17.8363	17.1345	17.6169	17.5292
G4V7X7	tr|G4V7X7|G4V7X7_SCHMA Actin-related protein 2/3 complex subunit 4 OS=Schistosoma mansoni GN=Smp_160770.1 PE=3 SV=1	5	19.651	0.131917	21.8433	21.6155	21.2558	21.5715	21.7125	21.8207	20.7856	21.4396
G4V7X9	tr|G4V7X9|G4V7X9_SCHMA Adducin related protein OS=Schistosoma mansoni GN=Smp_071140 PE=4 SV=1	16	86.545	0.269915	20.7842	20.3965	21.0231	20.7346	20.5713	20.2466	20.5761	20.4647
G4V7Y0	tr|G4V7Y0|G4V7Y0_SCHMA Formin binding protein and related proteins OS=Schistosoma mansoni GN=Smp_071150 PE=4 SV=1	10	65.288	0.220807	19.8346	19.4207	18.8693	19.3749	19.2496	19.0181	19.1945	19.1541
G4V7Y4;G4V7Y3	tr|G4V7Y4|G4V7Y4_SCHMA Serine/threonine protein phosphatase 2A regulatory subunit OS=Schistosoma mansoni GN=Smp_035430.2 PE=3 SV=1;tr|G4V7Y3|G4V7Y3_SCHMA Serine/threonine protein phosphatase 2A regulatory subunit OS=Schistosoma mansoni GN=Smp_035430.1 PE=3	7	56.536	0.435608	20.673	19.9531	21.0386	20.5549	20.4869	19.606	20.265	20.1193
G4V7Z3;G4V7Z4	tr|G4V7Z3|G4V7Z3_SCHMA Putative snare protein sec22 OS=Schistosoma mansoni GN=Smp_035300.1 PE=3 SV=1;tr|G4V7Z4|G4V7Z4_SCHMA Putative snare protein sec22 OS=Schistosoma mansoni GN=Smp_035300.2 PE=3 SV=1	6	22.16	0.0567462	20.9431	20.9945	20.9181	20.9519	20.7805	21.1017	20.8033	20.8952
G4V7Z7;G4V7Z8	tr|G4V7Z7|G4V7Z7_SCHMA Malate dehydrogenase OS=Schistosoma mansoni GN=Smp_035270.2 PE=3 SV=1;tr|G4V7Z8|G4V7Z8_SCHMA Malate dehydrogenase OS=Schistosoma mansoni GN=Smp_035270.1 PE=3 SV=1	18	36.198	-0.771056	24.1916	24.0498	24.2483	24.1632	25.0014	24.9479	24.8536	24.9343
G4V7Z9	tr|G4V7Z9|G4V7Z9_SCHMA Epidermal growth factor receptor kinase substrate eps8-related protein OS=Schistosoma mansoni GN=Smp_035260.1 PE=4 SV=1	11	50.188	2.13656	22.577	22.1334	22.7314	22.4806	20.3786	20.1564	20.497	20.344
G4V802	tr|G4V802|G4V802_SCHMA Uncharacterized protein OS=Schistosoma mansoni GN=Smp_035210 PE=4 SV=1	43	104.94	-0.802549	21.8719	21.8197	21.6127	21.7681	22.4206	22.4929	22.7984	22.5707
G4V805;G4V804;G4V806;G4V803	tr|G4V805|G4V805_SCHMA Putative hsp40, subfamily A, members 1,2,4 OS=Schistosoma mansoni GN=Smp_035200.4 PE=3 SV=1;tr|G4V804|G4V804_SCHMA Putative hsp40, subfamily A, members 1,2,4 OS=Schistosoma mansoni GN=Smp_035200.3 PE=4 SV=1;tr|G4V806|G4V806_SCHMA Put	20	45.224	-0.377684	23.7413	23.5438	24.4649	23.9167	24.2121	24.1938	24.4771	24.2944
G4V823	tr|G4V823|G4V823_SCHMA Putative phospholipase DDHD1 OS=Schistosoma mansoni GN=Smp_141150 PE=4 SV=1	2	83.678	-0.337201	16.3565	17.2146	14.5558	16.0423	16.1606	17.0913	15.8865	16.3795
G4V824	tr|G4V824|G4V824_SCHMA Uncharacterized protein OS=Schistosoma mansoni GN=Smp_035040 PE=4 SV=1	1	31.582	0.0828757	17.1506	16.9635	16.8044	16.9728	17.1884	16.6732	16.8084	16.89
G4V825	tr|G4V825|G4V825_SCHMA Putative atp-dependent RNA helicase OS=Schistosoma mansoni GN=Smp_035030 PE=4 SV=1	20	145.19	0.788016	19.2543	17.5508	19.06	18.6217	19.0227	16.6831	17.7952	17.8337
G4V838;G4V839;G4V840;O17460;O17459	tr|G4V838|G4V838_SCHMA Uncharacterized protein OS=Schistosoma mansoni GN=Smp_034940.1 PE=4 SV=1;tr|G4V839|G4V839_SCHMA Uncharacterized protein OS=Schistosoma mansoni GN=Smp_034940.2 PE=4 SV=1;tr|G4V840|G4V840_SCHMA Uncharacterized protein OS=Schistosoma ma	12	88.594	-0.631431	19.0159	18.1845	17.5477	18.2494	19.2354	18.8312	18.5758	18.8808
G4V841	tr|G4V841|G4V841_SCHMA Putative DNAj (Hsp40) homolog, subfamily B, member OS=Schistosoma mansoni GN=Smp_141080 PE=4 SV=1	6	41.95	-1.47808	18.4433	18.3619	19.1115	18.6389	20.4022	19.7804	20.1682	20.1169
G4V844	tr|G4V844|G4V844_SCHMA AP complex subunit beta OS=Schistosoma mansoni GN=Smp_034870 PE=3 SV=1	19	95.869	-0.4462	21.2656	21.2904	20.0488	20.8683	21.5734	21.1342	21.2358	21.3145
G4V846	tr|G4V846|G4V846_SCHMA Twik family of potassium channels-related OS=Schistosoma mansoni GN=Smp_034850 PE=3 SV=1	3	34.604	-0.0430827	19.8503	19.4848	19.1036	19.4796	19.5015	19.4739	19.5926	19.5227
G4V848	tr|G4V848|G4V848_SCHMA Mps one binder kinase activator-like 2 (Mob1 homolog 2) (Protein mob3) OS=Schistosoma mansoni GN=Smp_095470 PE=4 SV=1	2	25.701	0.36006	18.0072	18.6107	17.294	17.9706	18.5173	17.0918	17.2226	17.6106
G4V850	tr|G4V850|G4V850_SCHMA Putative dynein light chain OS=Schistosoma mansoni GN=Smp_174510 PE=4 SV=1	3	11.888	3.53904	22.9635	22.6731	23.5214	23.0526	20.2957	19.2985	18.9466	19.5136
G4V856	tr|G4V856|G4V856_SCHMA Family M1 non-peptidase homologue (M01 family) OS=Schistosoma mansoni GN=Smp_174540 PE=4 SV=1	5	46.587	1.21596	17.069	17.9677	17.9431	17.6599	15.4722	17.5344	16.3253	16.444
G4V857	tr|G4V857|G4V857_SCHMA Aminopeptidase A (M01 family) OS=Schistosoma mansoni GN=Smp_173030 PE=4 SV=1	4	56.244	0.264855	18.8644	18.0217	18.5029	18.463	17.4477	18.4207	18.726	18.1981
G4V867	tr|G4V867|G4V867_SCHMA Putative cop-coated vesicle membrane protein P24 (Emp24/gp25l family) OS=Schistosoma mansoni GN=Smp_154960.1 PE=3 SV=1	4	25.013	0.392444	22.4638	22.4061	22.1326	22.3342	21.8653	21.7298	22.2301	21.9417
G4V874	tr|G4V874|G4V874_SCHMA Uncharacterized protein OS=Schistosoma mansoni GN=Smp_114430 PE=4 SV=1	1	13.528	0.433533	19.6981	19.61		19.6541	19.4053	19.3179	18.9383	19.2205
G4V878	tr|G4V878|G4V878_SCHMA Putative neuroendocrine convertase 2 (EC 3.4.21.94) (NEC 2) (PC2) (Prohormone convertase 2) (Proprotein convertase 2) (KEX2-like endoprotease 2) OS=Schistosoma mansoni GN=Smp_077980 PE=3 SV=1	2	72.707	0.0904488	17.1662	17.3051	18.1328	17.5347	17.2824	17.7325	17.3179	17.4443
G4V890;G4V889;G4V888	tr|G4V890|G4V890_SCHMA Uncharacterized protein OS=Schistosoma mansoni GN=Smp_006830.2 PE=4 SV=1;tr|G4V889|G4V889_SCHMA Uncharacterized protein OS=Schistosoma mansoni GN=Smp_006830.1 PE=4 SV=1;tr|G4V888|G4V888_SCHMA Uncharacterized protein OS=Schistosoma ma	2	21.723	0.145507	18.2407	18.9642	17.7411	18.3153	18.0409	18.034	18.4346	18.1698
G4V895	tr|G4V895|G4V895_SCHMA Uncharacterized protein OS=Schistosoma mansoni GN=Smp_006860.2 PE=4 SV=1	10	20.938	-0.231858	24.3074	24.2819	24.2126	24.2673	24.6917	24.6364	24.1694	24.4992
G4V8A5	tr|G4V8A5|G4V8A5_SCHMA Putative spectrin beta chain, brain 4 (Spectrin, non-erythroid beta chain 4) (Beta-V spectrin) (BSPECV) OS=Schistosoma mansoni GN=Smp_196570 PE=4 SV=1	128	282.37	-0.17178	23.9829	23.9783	23.9429	23.968	24.1275	24.0569	24.2351	24.1398
G4V8A7	tr|G4V8A7|G4V8A7_SCHMA Putative collagen alpha-1(V) chain OS=Schistosoma mansoni GN=Smp_170330 PE=3 SV=1	13	295.97	-0.193699	19.5313	19.4389	20.2788	19.7497	19.9063	19.6765	20.2474	19.9434
G4V8A8	tr|G4V8A8|G4V8A8_SCHMA Putative collagen alpha-1(V) chain OS=Schistosoma mansoni GN=Smp_170340 PE=3 SV=1	7	176.75	0.0671249	20.2754	20.2271	20.4654	20.3226	20.4415	19.9572	20.3677	20.2555
G4V8B3	tr|G4V8B3|G4V8B3_SCHMA Uncharacterized protein OS=Schistosoma mansoni GN=Smp_020450 PE=4 SV=1	7	55.41	0.482234	19.735	19.7603	19.7789	19.7581	18.9005	19.2489	19.6781	19.2758
G4V8B4	tr|G4V8B4|G4V8B4_SCHMA Putative arginyl-tRNA synthetase OS=Schistosoma mansoni GN=Smp_133280 PE=3 SV=1	23	71.361	-0.385863	20.8322	20.9676	20.3776	20.7258	20.9108	21.1902	21.234	21.1117
G4V8B5	tr|G4V8B5|G4V8B5_SCHMA Sel-1-like protein, sel-1l OS=Schistosoma mansoni GN=Smp_133270 PE=4 SV=1	5	87.214	0.448803	16.9027	17.279	16.8618	17.0145	15.8632	16.5518	17.2821	16.5657
G4V8C2	tr|G4V8C2|G4V8C2_SCHMA Reticulon-like protein OS=Schistosoma mansoni GN=Smp_020370 PE=4 SV=1	6	24.279	0.866249	22.9629	22.8684	22.4314	22.7542	21.5891	21.9043	22.1705	21.888
G4V8C4;G4V8C5	tr|G4V8C4|G4V8C4_SCHMA Putative alpha-glucosidase OS=Schistosoma mansoni GN=Smp_020340 PE=3 SV=1;tr|G4V8C5|G4V8C5_SCHMA Putative alpha-glucosidase OS=Schistosoma mansoni GN=Smp_133210 PE=3 SV=1	9	101.57	-1.36958	17.7136	17.963	16.3552	17.3439	18.6895	18.6412	18.8098	18.7135
G4V8C8	tr|G4V8C8|G4V8C8_SCHMA Peptidase Clp (S14 family) OS=Schistosoma mansoni GN=Smp_210410 PE=4 SV=1	7	36.186	-0.0815436	21.1028	21.0118	20.5633	20.8926	20.8998	21.0739	20.9488	20.9742
G4V8D5;G4V8D6	tr|G4V8D5|G4V8D5_SCHMA Putative zeta-coat protein OS=Schistosoma mansoni GN=Smp_020220.1 PE=4 SV=1;tr|G4V8D6|G4V8D6_SCHMA Putative zeta-coat protein OS=Schistosoma mansoni GN=Smp_020220.2 PE=4 SV=1	3	19.502	0.0426956	21.5117	21.337	20.172	21.0069	21.0742	20.8102	21.0082	20.9642
G4V8F5	tr|G4V8F5|G4V8F5_SCHMA Rhomboid-like protein OS=Schistosoma mansoni GN=Smp_020090 PE=3 SV=1	2	44.756	1.02568	18.9009	18.8364	18.1901	18.6425			17.6168	17.6168
G4V8F8	tr|G4V8F8|G4V8F8_SCHMA Uncharacterized protein OS=Schistosoma mansoni GN=Smp_020070 PE=4 SV=1	37	96.475	3.81411	24.0749	24.2121	23.5394	23.9421	20.4805	19.8063	20.0972	20.128
G4V8F9	tr|G4V8F9|G4V8F9_SCHMA Uncharacterized protein OS=Schistosoma mansoni GN=Smp_020060 PE=4 SV=1	3	75.327	1.00144	17.2836	17.2965	17.8274	17.4691	16.757		16.1784	16.4677
G4V8G0	tr|G4V8G0|G4V8G0_SCHMA Putative cop9 signalosome complex subunit OS=Schistosoma mansoni GN=Smp_020050 PE=4 SV=1	8	51.839	-0.0482275	19.5675	19.1052	19.2607	19.3112	19.7287	18.7867	19.5628	19.3594
G4V8G2;G4V8G1	tr|G4V8G2|G4V8G2_SCHMA Uncharacterized protein OS=Schistosoma mansoni GN=Smp_020040.2 PE=3 SV=1;tr|G4V8G1|G4V8G1_SCHMA Uncharacterized protein OS=Schistosoma mansoni GN=Smp_020040.1 PE=3 SV=1	7	42.117	0.0556652	19.2841	19.9546	19.5635	19.6007	19.6357	19.9444	19.055	19.5451
G4V8G8	tr|G4V8G8|G4V8G8_SCHMA Putative syntaxin OS=Schistosoma mansoni GN=Smp_019890 PE=3 SV=1	6	29.962	1.25799	21.4276	21.0649	21.1575	21.2167	19.5544	20.3066	20.015	19.9587
G4V8H0	tr|G4V8H0|G4V8H0_SCHMA Serine/threonine kinase OS=Schistosoma mansoni GN=Smp_133020 PE=4 SV=1	5	27.231	-1.10823	17.889	19.6573	19.8854	19.1439	20.3093	20.1767	20.2705	20.2522
G4V8H1	tr|G4V8H1|G4V8H1_SCHMA Putative p38 MAPk OS=Schistosoma mansoni GN=Smp_191040 PE=4 SV=1	1	10.145	-0.16509	20.2696	20.3656	20.3609	20.332	20.04	20.6914	20.76	20.4971
G4V8H7	tr|G4V8H7|G4V8H7_SCHMA Putative importin 7 OS=Schistosoma mansoni GN=Smp_133710 PE=4 SV=1	6	61.683	-0.736441	19.2036	19.5047	17.7487	18.819	19.4909	19.4989	19.6765	19.5555
G4V8H9	tr|G4V8H9|G4V8H9_SCHMA Putative hiv-1 rev binding protein, hrbl OS=Schistosoma mansoni GN=Smp_021290 PE=4 SV=1	4	55.465	0.888826	17.6846	18.7433	18.0934	18.1738	16.009	18.5609		17.285
G4V8I1	tr|G4V8I1|G4V8I1_SCHMA Putative udp-glucose glycoprotein:glucosyltransferase OS=Schistosoma mansoni GN=Smp_133700 PE=4 SV=1	17	189.18	-1.16174	17.0625	16.7115	16.5565	16.7768	18.4192	17.4798	17.9168	17.9386
G4V8J2	tr|G4V8J2|G4V8J2_SCHMA Uncharacterized protein OS=Schistosoma mansoni GN=Smp_148070 PE=4 SV=1	3	84.319	-0.4288	13.8797		14.7949	14.3373	15.4116	14.804	14.0826	14.7661
G4V8L1	tr|G4V8L1|G4V8L1_SCHMA Uncharacterized protein OS=Schistosoma mansoni GN=Smp_090870 PE=4 SV=1	4	96.66	-0.098666	18.276	18.7403	18.0993	18.3718	18.5379	18.178	18.6956	18.4705
G4V8L2	tr|G4V8L2|G4V8L2_SCHMA Uncharacterized protein OS=Schistosoma mansoni GN=Smp_090860 PE=4 SV=1	10	55.655	0.225809	20.8391	20.1727	20.6607	20.5575	20.2135	20.3469	20.4347	20.3317
G4V8L4	tr|G4V8L4|G4V8L4_SCHMA Putative heat shock protein 70 OS=Schistosoma mansoni GN=Smp_106930 PE=3 SV=1	1	69.858	-0.431061	21.9241	22.7061	22.8581	22.4961	22.6635	23.1816	22.9365	22.9272
G4V8M3	tr|G4V8M3|G4V8M3_SCHMA Uncharacterized protein OS=Schistosoma mansoni GN=Smp_019940.1 PE=4 SV=1	1	40.527	-0.34551	16.734	17.7527		17.2434	17.0191	17.7452	18.0024	17.5889
G4V8N4	tr|G4V8N4|G4V8N4_SCHMA Peptidyl-prolyl cis-trans isomerase OS=Schistosoma mansoni GN=Smp_210750 PE=4 SV=1	3	15.148	-0.828013	17.672	19.3081	18.0735	18.3512	18.9572	19.3674	19.2131	19.1792
G4V8P0	tr|G4V8P0|G4V8P0_SCHMA Dcp1 related OS=Schistosoma mansoni GN=Smp_165960 PE=4 SV=1	3	55.878	-0.557433	16.8066	17.5276	15.0404	16.4582	16.4259	17.6054		17.0156
G4V8P7	tr|G4V8P7|G4V8P7_SCHMA Putative flightless-I OS=Schistosoma mansoni GN=Smp_165930 PE=4 SV=1	7	152.45	-0.32027	16.2117	15.0004	15.1362	15.4494	17.1095	14.9929	15.2066	15.7697
G4V8Q4;G4V8Q3	tr|G4V8Q4|G4V8Q4_SCHMA Putative developmentally regulated GTP-binding protein 1 (Drg 1) OS=Schistosoma mansoni GN=Smp_173180.1 PE=4 SV=1;tr|G4V8Q3|G4V8Q3_SCHMA Putative developmentally regulated GTP-binding protein 1 (Drg 1) OS=Schistosoma mansoni GN=Smp_1	4	36.959	0.232153	17.1394	17.9719	18.0357	17.7156	17.2009	17.4851	17.7644	17.4835
G4V8Q5	tr|G4V8Q5|G4V8Q5_SCHMA Actin-related protein 10, arp10 OS=Schistosoma mansoni GN=Smp_093230 PE=3 SV=1	5	45.674	-0.344625	18.9181	19.1264	18.7468	18.9304	19.2895	19.3607	19.175	19.2751
G4V8Q6	tr|G4V8Q6|G4V8Q6_SCHMA Uncharacterized protein OS=Schistosoma mansoni GN=Smp_093220 PE=4 SV=1	25	74.223	-0.194466	23.2543	23.3681	23.3994	23.3406	23.4567	23.5403	23.6081	23.5351
G4V8Q8	tr|G4V8Q8|G4V8Q8_SCHMA Uncharacterized protein Smp_200410 OS=Schistosoma mansoni GN=Smp_200410 PE=3 SV=1	2	36.738	-0.958446			16.9966	16.9966	17.639	18.0376	18.1884	17.955
G4V8S1;G4V8S0	tr|G4V8S1|G4V8S1_SCHMA Non-specific serine/threonine protein kinase OS=Schistosoma mansoni GN=Smp_014170.1 PE=4 SV=1;tr|G4V8S0|G4V8S0_SCHMA Non-specific serine/threonine protein kinase OS=Schistosoma mansoni GN=Smp_014170.2 PE=4 SV=1	3	98.946	-0.10271		14.7943	14.8287	14.8115	15.251	14.9241	14.5675	14.9142
G4V8T2;G4VB03	tr|G4V8T2|G4V8T2_SCHMA Uncharacterized protein OS=Schistosoma mansoni GN=Smp_014270 PE=4 SV=1;tr|G4VB03|G4VB03_SCHMA Uncharacterized protein OS=Schistosoma mansoni GN=Smp_007300 PE=4 SV=1	1	10.855	-0.597177	19.3337	19.9411	18.7456	19.3401	20.1001	20.0213	19.6905	19.9373
G4V8V4	tr|G4V8V4|G4V8V4_SCHMA Putative acyl-coenzyme A binding domain containing (Fragment) OS=Schistosoma mansoni GN=Smp_147930 PE=4 SV=1	1	27.661	-0.00789849	17.1275	18.2087	17.6603	17.6655	17.1255	18.0686	17.8261	17.6734
G4V8W2	tr|G4V8W2|G4V8W2_SCHMA Putative high-affinity copper uptake protein OS=Schistosoma mansoni GN=Smp_048230 PE=4 SV=1	2	22.516	-1.24854	19.7655	18.4855	19.8102	19.3538	20.8431	20.4124	20.5513	20.6023
G4V8W3	tr|G4V8W3|G4V8W3_SCHMA Putative mannose-1-phosphate guanyltransferase OS=Schistosoma mansoni GN=Smp_048240 PE=4 SV=1	9	51.475	0.360122	19.5364	19.3968	19.3906	19.4413	19.2156	18.7292	19.2987	19.0812
G4V8X7	tr|G4V8X7|G4V8X7_SCHMA Putative heat shock protein-HSP20/alpha crystallin family OS=Schistosoma mansoni GN=Smp_049250 PE=3 SV=1	18	37.034	0.379602	26.6384	26.7533	26.7234	26.705	26.1131	26.4479	26.4153	26.3254
G4V8X8	tr|G4V8X8|G4V8X8_SCHMA Putative heat shock protein hsp16 OS=Schistosoma mansoni GN=Smp_148530 PE=3 SV=1	30	77.835	0.524578	24.6215	24.7345	24.5432	24.633	23.9606	24.2002	24.1646	24.1085
G4V8X9	tr|G4V8X9|G4V8X9_SCHMA Putative heat shock protein OS=Schistosoma mansoni GN=Smp_049270 PE=3 SV=1	16	52.245	-0.0243309	24.1727	24.5125	24.4553	24.3802	24.2844	24.3918	24.5374	24.4045
G4V8Y1	tr|G4V8Y1|G4V8Y1_SCHMA Elongation factor Ts, mitochondrial OS=Schistosoma mansoni GN=Smp_148540 PE=3 SV=1	10	34.911	-0.435858	19.7687	19.4409	19.9262	19.712	20.3099	20.1018	20.0317	20.1478
G4V8Y7;G4V8Y2	tr|G4V8Y7|G4V8Y7_SCHMA Putative major egg antigen OS=Schistosoma mansoni GN=Smp_049300.3 PE=3 SV=1;tr|G4V8Y2|G4V8Y2_SCHMA Putative heat shock protein OS=Schistosoma mansoni GN=Smp_049300.1 PE=3 SV=1	2	39.417	-1.23663		18.0794	18.0392	18.0593	18.7038	19.6734	19.5106	19.2959
G4V8Y8	tr|G4V8Y8|G4V8Y8_SCHMA Phosphatidate cytidylyltransferase, mitochondrial OS=Schistosoma mansoni GN=Smp_148560.1 PE=3 SV=1	3	42.954	-0.738141	16.5186	16.6208	17.4109	16.8501		17.1148	18.0617	17.5882
G4V8Z1	tr|G4V8Z1|G4V8Z1_SCHMA Putative supervillin OS=Schistosoma mansoni GN=Smp_196250 PE=4 SV=1	4	260.79	2.43267	16.3914	13.9135	17.7368	16.0139	13.4174		13.7451	13.5812
G4V8Z5	tr|G4V8Z5|G4V8Z5_SCHMA Pyrroline-5-carboxylate reductase OS=Schistosoma mansoni GN=Smp_049390 PE=3 SV=1	3	33.706	-0.0253234	18.5383	18.404	18.2242	18.3889	18.521	18.3551	18.3665	18.4142
G4V8Z9	tr|G4V8Z9|G4V8Z9_SCHMA Uncharacterized protein OS=Schistosoma mansoni GN=Smp_148620 PE=4 SV=1	2	185.98	1.2469	14.1629		18.9785	16.5707	15.0866	15.5718	15.3131	15.3238
G4V904	tr|G4V904|G4V904_SCHMA Putative atp-dependent transporter OS=Schistosoma mansoni GN=Smp_049500 PE=4 SV=1	2	81.9	-0.350537	14.6805	14.8875		14.784	14.6725	14.4693	16.2618	15.1345
G4V906;Q26544	tr|G4V906|G4V906_SCHMA Putative wd repeat protein SL1-17 OS=Schistosoma mansoni GN=Smp_049520 PE=4 SV=1;sp|Q26544|WSL17_SCHMA WD repeat-containing protein SL1-17 OS=Schistosoma mansoni PE=2 SV=1	2	32.998	0.140788		17.8398	17.8611	17.8505	17.6028	17.7484	17.7778	17.7097
G4V910	tr|G4V910|G4V910_SCHMA Putative heat shock protein 70 (Hsp70) OS=Schistosoma mansoni GN=Smp_049550 PE=3 SV=1	29	71.237	-0.0995032	24.6679	24.7071	24.5132	24.6294	24.6311	24.6602	24.8954	24.7289
G4V913	tr|G4V913|G4V913_SCHMA Uncharacterized protein OS=Schistosoma mansoni GN=Smp_175570 PE=4 SV=1	4	24.801	0.100469	20.6645	20.8249	20.9325	20.8073	20.6786	20.6724	20.7694	20.7068
G4V926	tr|G4V926|G4V926_SCHMA Proteasome catalytic subunit 1 (T01 family) OS=Schistosoma mansoni GN=Smp_034490 PE=4 SV=1	6	24.485	-0.134624	21.0301	20.3094	20.5694	20.6363	20.6762	21.1205	20.516	20.7709
G4V935	tr|G4V935|G4V935_SCHMA Putative alpha-actinin OS=Schistosoma mansoni GN=Smp_034550 PE=4 SV=1	48	104.32	-1.52329	21.8816	21.9289	21.5281	21.7795	23.3155	23.3534	23.2396	23.3028
G4V946;G4V945	tr|G4V946|G4V946_SCHMA Uncharacterized protein OS=Schistosoma mansoni GN=Smp_140900.1 PE=4 SV=1;tr|G4V945|G4V945_SCHMA Uncharacterized protein OS=Schistosoma mansoni GN=Smp_140900.2 PE=4 SV=1	6	20.967	0.216794	22.4016	22.1146	21.6997	22.072	21.8445	21.9923	21.7288	21.8552
G4V949	tr|G4V949|G4V949_SCHMA Tubulin gamma chain OS=Schistosoma mansoni GN=Smp_034670 PE=3 SV=1	7	55.091	0.983153	19.1978	19.2976	19.9763	19.4906	18.707	18.5912	18.2242	18.5074
G4V952;G4V953	tr|G4V952|G4V952_SCHMA Sco1-related OS=Schistosoma mansoni GN=Smp_034700.1 PE=4 SV=1;tr|G4V953|G4V953_SCHMA Sco1-related OS=Schistosoma mansoni GN=Smp_034700.3 PE=4 SV=1	6	26.812	-0.137258	18.6407	18.9156	19.2891	18.9484	18.586	19.6573	19.0138	19.0857
G4V958	tr|G4V958|G4V958_SCHMA Putative phosphoglucomutase OS=Schistosoma mansoni GN=Smp_085150 PE=3 SV=1	15	63.799	0.4446	21.4106	21.8492	21.7048	21.6549	21.242	21.26	21.1287	21.2103
G4V959	tr|G4V959|G4V959_SCHMA Putative vav2 OS=Schistosoma mansoni GN=Smp_168370.1 PE=4 SV=1	3	116.39	-0.446155	15.7531	15.7686	14.9262	15.4826	15.258	16.0314	16.4969	15.9288
G4V966	tr|G4V966|G4V966_SCHMA Putative starch branching enzyme II OS=Schistosoma mansoni GN=Smp_094880 PE=4 SV=1	30	79.685	-0.685987	22.1749	22.4919	22.2685	22.3118	22.9324	23.0828	22.9782	22.9978
G4V969;A9NI52	tr|G4V969|G4V969_SCHMA Putative 26s protease regulatory subunit OS=Schistosoma mansoni GN=Smp_012470 PE=3 SV=1;tr|A9NI52|A9NI52_SCHMA 26S proteasome subunit ATPase 2 (Fragment) OS=Schistosoma mansoni GN=RPT1 PE=2 SV=1	20	48.509	-0.0168747	21.3669	21.5276	20.9933	21.296	21.1208	21.4985	21.3192	21.3128
G4V979	tr|G4V979|G4V979_SCHMA Putative guanine-nucleotide-exchange-factor OS=Schistosoma mansoni GN=Smp_012580 PE=4 SV=1	3	101.89	0.562482	16.3557	16.5373	15.5152	16.1361	15.2703	15.7092	15.7413	15.5736
G4V986;G4V985;G4V984;G4V983	tr|G4V986|G4V986_SCHMA Putative DNAj (Hsp40) homolog, subfamily C, member OS=Schistosoma mansoni GN=Smp_049600.1 PE=4 SV=1;tr|G4V985|G4V985_SCHMA Putative DNAj (Hsp40) homolog, subfamily C, member OS=Schistosoma mansoni GN=Smp_049600.4 PE=4 SV=1;tr|G4V984|	9	55.418	0.367719	19.9379	20.3018	20.2705	20.1701	19.3669	20.0191	20.021	19.8023
G4V9A5;G4V9A6	tr|G4V9A5|G4V9A5_SCHMA Transketolase OS=Schistosoma mansoni GN=Smp_059790.2 PE=4 SV=1;tr|G4V9A6|G4V9A6_SCHMA Transketolase OS=Schistosoma mansoni GN=Smp_059790.1 PE=4 SV=1	29	67.153	0.465675	26.1635	26.4105	26.2681	26.2807	25.8038	25.763	25.8783	25.815
G4V9A7	tr|G4V9A7|G4V9A7_SCHMA Putative rab6-interacting protein 2 (ERC protein 1) OS=Schistosoma mansoni GN=Smp_059780 PE=4 SV=1	4	57.357	-0.588234	15.9519		17.004	16.4779	17.3189	17.0545	16.8251	17.0662
G4V9B1	tr|G4V9B1|G4V9B1_SCHMA Putative elongin B OS=Schistosoma mansoni GN=Smp_072380 PE=4 SV=1	6	13.655	-0.510212	21.8445	21.7043	21.7878	21.7789	22.3377	22.5637	21.9659	22.2891
G4V9B5;A9NI60	tr|G4V9B5|G4V9B5_SCHMA Putative 26s protease regulatory subunit 6b OS=Schistosoma mansoni GN=Smp_072340 PE=3 SV=1;tr|A9NI60|A9NI60_SCHMA 26S proteasome subunit RPT3 (Fragment) OS=Schistosoma mansoni GN=RPT3 PE=2 SV=1	13	46.795	0.222464	21.3204	21.367	21.3717	21.353	21.0292	21.272	21.0904	21.1306
G4V9B9;G4V9B8;Q26582	tr|G4V9B9|G4V9B9_SCHMA Putative heat shock protein OS=Schistosoma mansoni GN=Smp_072330.2 PE=3 SV=1;tr|G4V9B8|G4V9B8_SCHMA Putative heat shock protein OS=Schistosoma mansoni GN=Smp_072330.1 PE=3 SV=1;tr|Q26582|Q26582_SCHMA Heat shock protein 86 (Fragment)	46	82.174	-0.278639	26.5326	26.4095	26.0715	26.3379	26.605	26.6141	26.6306	26.6165
G4V9C3	tr|G4V9C3|G4V9C3_SCHMA Putative rab15, 13, 10, 1, 35, 5, and OS=Schistosoma mansoni GN=Smp_210430 PE=4 SV=1	6	24.441	0.258181	23.0538	22.8815	22.5202	22.8185	22.6012	22.5042	22.5756	22.5603
G4V9C8	tr|G4V9C8|G4V9C8_SCHMA Putative succinate semialdehyde dehydrogenase OS=Schistosoma mansoni GN=Smp_161350 PE=3 SV=1	7	59.616	-0.329069	19.0396	19.3518	20.8843	19.7586	19.9438	20.1985	20.1206	20.0876
G4V9D5	tr|G4V9D5|G4V9D5_SCHMA Putative cyclin fold protein OS=Schistosoma mansoni GN=Smp_172050 PE=3 SV=1	1	46.14	0.165531	15.9559	15.9766	16.4483	16.1269		15.7666	16.1563	15.9614
G4V9E1	tr|G4V9E1|G4V9E1_SCHMA Putative immunoglobulin domain superfamily (Sensory guidance protein) OS=Schistosoma mansoni GN=Smp_172070 PE=4 SV=1	4	91.73	-0.189508	17.2625	16.3976	16.8974	16.8525	17.434	17.3868	16.3054	17.042
G4V9E4	tr|G4V9E4|G4V9E4_SCHMA Glutamine synthetase OS=Schistosoma mansoni GN=Smp_091460 PE=3 SV=1	14	40.904	0.200034	24.3381	24.1988	24.367	24.3013	23.9884	24.2681	24.0473	24.1013
G4V9G0	tr|G4V9G0|G4V9G0_SCHMA Aminomethyltransferase OS=Schistosoma mansoni GN=Smp_128980 PE=3 SV=1	2	40.946	0.457497	16.351	17.1797	17.4715	17.0007	16.1366	16.8787	16.6144	16.5432
G4V9G1	tr|G4V9G1|G4V9G1_SCHMA Coronin OS=Schistosoma mansoni GN=Smp_012720 PE=3 SV=1	18	60.23	-0.593347	21.8173	22.0958	21.9267	21.9466	22.4748	22.5691	22.5759	22.5399
G4V9G5	tr|G4V9G5|G4V9G5_SCHMA Putative 60s ribosomal protein L12 OS=Schistosoma mansoni GN=Smp_012750 PE=3 SV=1	4	17.73	-0.0439568	23.0795	22.9528	22.2144	22.7489	22.8482	22.7692	22.7612	22.7928
G4V9G7	tr|G4V9G7|G4V9G7_SCHMA Putative sarm1 OS=Schistosoma mansoni GN=Smp_012780 PE=4 SV=1	5	136.48	0.629107	15.5624	18.2722	15.3387	16.3911	15.2194	15.8611	16.2055	15.762
G4V9G9	tr|G4V9G9|G4V9G9_SCHMA Uncharacterized protein OS=Schistosoma mansoni GN=Smp_012800 PE=4 SV=1	2	10.231	-0.420811	19.6312	20.3913	19.913	19.9785	20.6563	20.5366	20.0051	20.3993
G4V9H0	tr|G4V9H0|G4V9H0_SCHMA Putative four and A half lim domains OS=Schistosoma mansoni GN=Smp_012810 PE=4 SV=1	10	13.63	-0.337576	24.1389	24.1786	23.7547	24.0241	24.2767	24.4794	24.3289	24.3617
G4V9H8	tr|G4V9H8|G4V9H8_SCHMA Putative dynamin OS=Schistosoma mansoni GN=Smp_129050 PE=3 SV=1	13	104.28	-0.812614	18.9345	18.9387	18.002	18.6251	19.743	19.1672	19.4028	19.4377
G4V9I0	tr|G4V9I0|G4V9I0_SCHMA Putative solute carrier family 17, member 7 (Vesicular glutamate transporter) OS=Schistosoma mansoni GN=Smp_129060 PE=4 SV=1	2	65.563	1.40104	16.2824	17.6369	17.8527	17.2573	15.7147		15.9978	15.8563
G4V9I2	tr|G4V9I2|G4V9I2_SCHMA Putative fuse-binding protein-interacting repressor siahbp1 OS=Schistosoma mansoni GN=Smp_012900 PE=4 SV=1	4	56.244	-0.0987976	18.1428	18.4158	18.0052	18.1879	18.1593	18.2329	18.4679	18.2867
G4V9I3	tr|G4V9I3|G4V9I3_SCHMA Uncharacterized protein OS=Schistosoma mansoni GN=Smp_129080 PE=4 SV=1	3	12.764	-0.753296	22.1465	21.6741	21.0131	21.6112	22.6117	22.3267	22.1551	22.3645
G4V9I5	tr|G4V9I5|G4V9I5_SCHMA Inosine-5-monophosphate dehydrogenase OS=Schistosoma mansoni GN=Smp_012930 PE=3 SV=1	15	55.062	-0.840612	20.401	20.3926	20.3609	20.3848	21.3462	21.2096	21.1205	21.2254
G4V9J6	tr|G4V9J6|G4V9J6_SCHMA Uncharacterized protein OS=Schistosoma mansoni GN=Smp_161030 PE=4 SV=1	9	30.57	-4.50146	14.609	18.2326		16.4208	21.0126	21.1234	20.6308	20.9222
G4V9J7	tr|G4V9J7|G4V9J7_SCHMA Uncharacterized protein OS=Schistosoma mansoni GN=Smp_071520 PE=4 SV=1	7	9.5759	-3.34066		19.7687	18.4599	19.1143	22.7176	22.5003	22.147	22.455
G4V9L3	tr|G4V9L3|G4V9L3_SCHMA Putative shc transforming protein OS=Schistosoma mansoni GN=Smp_172110 PE=3 SV=1	11	40.227	0.243047	23.2671	23.6163	23.4819	23.4551	22.9715	23.2181	23.4464	23.212
G4V9M0	tr|G4V9M0|G4V9M0_SCHMA Phosphate transporter OS=Schistosoma mansoni GN=Smp_094660 PE=3 SV=1	2	54.113	-0.539563	16.0859	17.1137	17.8432	17.0143	17.7893	17.1707	17.7014	17.5538
G4V9M3	tr|G4V9M3|G4V9M3_SCHMA Putative heat shock protein 70 (Hsp70) OS=Schistosoma mansoni GN=Smp_094680 PE=3 SV=1	1	22.197	-0.420446	17.3475	17.8332		17.5904	18.5264	17.7556	17.7504	18.0108
G4V9N7	tr|G4V9N7|G4V9N7_SCHMA Egf-like domain protein OS=Schistosoma mansoni GN=Smp_154760 PE=4 SV=1	30	198.16	0.929792	21.4481	21.4124	21.4291	21.4299	20.4393	20.413	20.6479	20.5001
G4V9N9	tr|G4V9N9|G4V9N9_SCHMA Putative nucleotide binding protein 2 (Nbp 2) OS=Schistosoma mansoni GN=Smp_210380 PE=4 SV=1	1	17.136	0.233857	17.3614	17.3019	16.9032	17.1888	16.8391	17.0709		16.955
G4V9Q0	tr|G4V9Q0|G4V9Q0_SCHMA Putative dynamin OS=Schistosoma mansoni GN=Smp_067280 PE=3 SV=1	11	77.096	-0.333555	18.6651	18.4653	18.6525	18.5943	19.2748	19.1697	18.3391	18.9279
G4V9R2	tr|G4V9R2|G4V9R2_SCHMA Putative membrane associated progesterone receptor OS=Schistosoma mansoni GN=Smp_093700 PE=3 SV=1	2	21.428	-0.000768845	19.0884	18.7051	18.7313	18.8416	18.8085	18.7018	19.0169	18.8424
G4V9S0;P25824	tr|G4V9S0|G4V9S0_SCHMA Adenylate kinase OS=Schistosoma mansoni GN=Smp_071390 PE=1 SV=1;sp|P25824|KAD_SCHMA Adenylate kinase OS=Schistosoma mansoni PE=2 SV=1	14	22.303	-0.163331	24.9198	24.4612	24.5609	24.6473	24.7929	25.0255	24.6136	24.8106
G4V9S3	tr|G4V9S3|G4V9S3_SCHMA Putative membrane traffic protein OS=Schistosoma mansoni GN=Smp_140490 PE=4 SV=1	5	56.112	0.399607	20.9793	20.9881	21.0758	21.0144	20.5427	20.9979	20.3039	20.6148
G4V9T2	tr|G4V9T2|G4V9T2_SCHMA Putative flotillin-2 OS=Schistosoma mansoni GN=Smp_033970 PE=4 SV=1	8	50.123	0.454998	19.948	19.8931	19.9853	19.9421	19.4106	19.3188	19.732	19.4871
G4V9U8	tr|G4V9U8|G4V9U8_SCHMA Uncharacterized protein OS=Schistosoma mansoni GN=Smp_140590 PE=4 SV=1	28	121.51	0.649475	21.7388	21.9202	21.8285	21.8292	21.1685	21.2152	21.1554	21.1797
G4V9U9	tr|G4V9U9|G4V9U9_SCHMA Putative major vault protein OS=Schistosoma mansoni GN=Smp_006740 PE=4 SV=1	36	97.253	0.697971	23.4874	23.4768	23.0843	23.3495	22.7958	22.3524	22.8063	22.6515
G4V9V3;G4V9V4	tr|G4V9V3|G4V9V3_SCHMA Putative synaptobrevin OS=Schistosoma mansoni GN=Smp_006720.1 PE=4 SV=1;tr|G4V9V4|G4V9V4_SCHMA Putative synaptobrevin OS=Schistosoma mansoni GN=Smp_006720.2 PE=4 SV=1	2	9.2153	-0.0536109	19.4609	19.7747	18.7648	19.3334	19.5252	19.5018	19.1341	19.387
G4V9W3	tr|G4V9W3|G4V9W3_SCHMA Uncharacterized protein OS=Schistosoma mansoni GN=Smp_125800 PE=4 SV=1	4	49.342	-1.52627	16.8375	16.8893	17.3282	17.0184	18.4612	18.2885	18.8842	18.5446
G4V9W9;G4V9X0	tr|G4V9W9|G4V9W9_SCHMA Putative scythe/bat3 OS=Schistosoma mansoni GN=Smp_125770.1 PE=4 SV=1;tr|G4V9X0|G4V9X0_SCHMA Putative scythe/bat3 OS=Schistosoma mansoni GN=Smp_125770.2 PE=4 SV=1	1	131.46	M only				N/A	15.6382	15.2188	15.7609	15.5393
G4V9X4	tr|G4V9X4|G4V9X4_SCHMA Uncharacterized protein OS=Schistosoma mansoni GN=Smp_006560 PE=4 SV=1	7	20.255	-0.890814	21.3683	21.1807	20.6328	21.0606	21.9057	22.1343	21.8143	21.9514
G4V9X6	tr|G4V9X6|G4V9X6_SCHMA Putative glutaredoxin, grx OS=Schistosoma mansoni GN=Smp_006550.1 PE=4 SV=1	7	23.978	0.362922	21.4525	21.1127	21.0218	21.1957	20.7578	20.9119	20.8286	20.8328
G4V9X7	tr|G4V9X7|G4V9X7_SCHMA Uncharacterized protein OS=Schistosoma mansoni GN=Smp_125730 PE=4 SV=1	9	76.309	-0.0657397	20.6819	19.8399	20.3515	20.2911	20.5446	19.8816	20.6444	20.3569
G4V9Y0	tr|G4V9Y0|G4V9Y0_SCHMA Putative pyruvate dehydrogenase OS=Schistosoma mansoni GN=Smp_068170.1 PE=4 SV=1	5	44.006	-1.25151	18.0219	18.5049	18.9406	18.4891	19.7932	19.6097	19.8191	19.7407
G4V9Y1	tr|G4V9Y1|G4V9Y1_SCHMA Putative pyruvate dehydrogenase OS=Schistosoma mansoni GN=Smp_070390 PE=4 SV=1	1	13.597	-0.714263	18.7186	18.1928	18.3476	18.4197	18.9345	19.1113	19.3561	19.1339
G4V9Y3	tr|G4V9Y3|G4V9Y3_SCHMA Putative transmembrane transport protein OS=Schistosoma mansoni GN=Smp_072950 PE=3 SV=1	7	24.537	-0.37673	22.7091	22.7424	22.1897	22.5471	22.9354	22.9119	22.9242	22.9238
G4V9Y4	tr|G4V9Y4|G4V9Y4_SCHMA Putative phosphorylase B kinase beta, kpbb OS=Schistosoma mansoni GN=Smp_161680 PE=4 SV=1	8	136.73	-1.00109	16.4638	16.8719	17.4408	16.9255	18.3188	17.2974	18.1636	17.9266
G4VA01;G4VA02	tr|G4VA01|G4VA01_SCHMA Ferritin OS=Schistosoma mansoni GN=Smp_063530.1 PE=3 SV=1;tr|G4VA02|G4VA02_SCHMA Ferritin OS=Schistosoma mansoni GN=Smp_063530.2 PE=3 SV=1	3	22.286	-0.253706	17.9252	20.0235	18.9556	18.9681	19.3998	19.8472	18.4185	19.2218
G4VA12	tr|G4VA12|G4VA12_SCHMA Putative g-protein, beta subunit OS=Schistosoma mansoni GN=Smp_063640 PE=4 SV=1	6	37.512	0.263166	21.8517	21.5492	22.056	21.8189	21.7941	21.3294	21.5438	21.5558
G4VA17	tr|G4VA17|G4VA17_SCHMA Uncharacterized protein OS=Schistosoma mansoni GN=Smp_063670 PE=4 SV=1	7	36.581	2.46297	18.3874	18.7753	18.9969	18.7199	15.7046	16.8442	16.2218	16.2569
G4VA23;B8YCP4	tr|G4VA23|G4VA23_SCHMA Putative 22.6kDa tegument-associated antigen OS=Schistosoma mansoni GN=Smp_086470 PE=4 SV=1;tr|B8YCP4|B8YCP4_SCHMA Tegument-associated antigen OS=Schistosoma mansoni PE=2 SV=1	11	21.624	2.92967	25.2618	24.9596	24.4387	24.8867	21.7995	22.5841	21.4875	21.957
G4VA28	tr|G4VA28|G4VA28_SCHMA Tegumental antigen OS=Schistosoma mansoni GN=SmTAL11 PE=2 SV=1	6	21.145	1.93599	22.8537	23.0456	22.9838	22.9611	21.0713	21.116	20.8878	21.0251
G4VA33	tr|G4VA33|G4VA33_SCHMA Putative eukaryotic translation initiation factor 3 subunit (Eif-3) OS=Schistosoma mansoni GN=Smp_161480 PE=4 SV=1	4	118.97	0.944937	15.5692	15.3973		15.4832	15.0194	13.2029	15.3926	14.5383
G4VA73	tr|G4VA73|G4VA73_SCHMA Putative vacuolar protein sorting 26, vps26 OS=Schistosoma mansoni GN=Smp_210780 PE=4 SV=1	28	92.712	-0.0452878	22.0194	22.0866	21.6534	21.9198	21.9986	21.9381	21.9585	21.9651
G4VA76	tr|G4VA76|G4VA76_SCHMA Uncharacterized protein OS=Schistosoma mansoni GN=Smp_161790.2 PE=4 SV=1	1	27.665	-0.0178879	21.2269	21.1963	20.9218	21.115	20.8841	21.2502	21.2645	21.1329
G4VA77	tr|G4VA77|G4VA77_SCHMA Uncharacterized protein OS=Schistosoma mansoni GN=Smp_161790.1 PE=4 SV=1	17	47.681	-0.285967	24.0369	23.9662	23.9173	23.9735	24.0917	24.2989	24.3876	24.2594
G4VA87	tr|G4VA87|G4VA87_SCHMA Putative neuroendocrine protein 7b2 OS=Schistosoma mansoni GN=Smp_073270 PE=4 SV=1	1	33.137	0.427018	16.7285		17.3577	17.0431	16.4904	16.7485	16.6092	16.616
G4VA88	tr|G4VA88|G4VA88_SCHMA Uncharacterized protein OS=Schistosoma mansoni GN=Smp_073280 PE=4 SV=1	2	30.379	1.24269	18.2742	19.8989	20.1333	19.4355	16.4455	19.0761	19.0568	18.1928
G4VA94	tr|G4VA94|G4VA94_SCHMA Putative intermembrane space import and assembly protein 40, mitochondrial (Mitochondrial import inner membrane translocase TIM40) OS=Schistosoma mansoni GN=Smp_062830.1 PE=4 SV=1	3	15.055	-1.67008	18.5263	18.9852	19.6373	19.0496	20.8012	21.2334	20.1245	20.7197
G4VA96	tr|G4VA96|G4VA96_SCHMA GrpE protein homolog OS=Schistosoma mansoni GN=Smp_062790 PE=3 SV=1	5	25.042	-1.48361	20.294	20.5028	18.853	19.8833	21.222	21.5117	21.3669	21.3669
G4VAA5;G4VAA6	tr|G4VAA5|G4VAA5_SCHMA Putative cysteinyl-tRNA synthetase OS=Schistosoma mansoni GN=Smp_170800.1 PE=3 SV=1;tr|G4VAA6|G4VAA6_SCHMA Putative cysteinyl-tRNA synthetase OS=Schistosoma mansoni GN=Smp_170800.2 PE=3 SV=1	17	92.476	-0.0809424	18.7601	18.9774	18.7244	18.8206	19.1876	18.8984	18.6187	18.9016
G4VAA7	tr|G4VAA7|G4VAA7_SCHMA Ubiquitin-specific peptidase 7 (C19 family) OS=Schistosoma mansoni GN=Smp_089180 PE=3 SV=1	26	156.44	-0.51387	20.3803	20.6433	19.9586	20.3274	20.8302	20.7612	20.9324	20.8413
G4VAB2	tr|G4VAB2|G4VAB2_SCHMA Uncharacterized protein OS=Schistosoma mansoni GN=Smp_089220 PE=4 SV=1	7	26.702	0.9677	22.1133	22.0276	22.1886	22.1098	20.8539	21.3982	21.1743	21.1421
G4VAD1	tr|G4VAD1|G4VAD1_SCHMA Receptor expression-enhancing protein OS=Schistosoma mansoni GN=Smp_099890 PE=3 SV=1	7	21.422	-0.287672	23.8724	23.9579	23.5687	23.7997	24.188	24.143	23.9312	24.0874
G4VAD2;Q94747	tr|G4VAD2|G4VAD2_SCHMA Elongation factor 1-alpha OS=Schistosoma mansoni GN=Smp_099870 PE=3 SV=1;tr|Q94747|Q94747_SCHMA Elongation factor 1-alpha OS=Schistosoma mansoni GN=EF1-alpha PE=2 SV=1	25	50.98	0.114681	26.4125	26.5704	26.3691	26.4507	26.3721	26.2721	26.3638	26.336
G4VAF7;G4VAF6;G4VAF8	tr|G4VAF7|G4VAF7_SCHMA Putative tumor protein d52 OS=Schistosoma mansoni GN=Smp_065470.2 PE=4 SV=1;tr|G4VAF6|G4VAF6_SCHMA Putative tumor protein d52 OS=Schistosoma mansoni GN=Smp_065470.3 PE=4 SV=1;tr|G4VAF8|G4VAF8_SCHMA Putative tumor protein d52 OS=Schis	5	18.337	-0.445513	21.6363	21.6965	20.6807	21.3378	21.7531	22.0285	21.5685	21.7833
G4VAG2	tr|G4VAG2|G4VAG2_SCHMA Calpain (C02 family) OS=Schistosoma mansoni GN=Smp_157500 PE=3 SV=1	49	172.93	2.36006	25.0079	24.8099	24.6709	24.8296	22.7303	22.2738	22.4044	22.4695
G4VAG6;G4VAG8;G4VAG7;G4VAG9;G4VAH0	tr|G4VAG6|G4VAG6_SCHMA Putative heterogeneous nuclear ribonucleoprotein k OS=Schistosoma mansoni GN=Smp_065580.5 PE=4 SV=1;tr|G4VAG8|G4VAG8_SCHMA Putative heterogeneous nuclear ribonucleoprotein k OS=Schistosoma mansoni GN=Smp_065580.1 PE=4 SV=1;tr|G4VAG7|	4	33.92	1.18371	19.3338	19.2442	19.1891	19.2557	18.4372	18.2082	17.5704	18.072
G4VAI0;G4VAH9	tr|G4VAI0|G4VAI0_SCHMA Pyruvate kinase OS=Schistosoma mansoni GN=Smp_065610.1 PE=3 SV=1;tr|G4VAH9|G4VAH9_SCHMA Pyruvate kinase OS=Schistosoma mansoni GN=Smp_065610.2 PE=3 SV=1	34	54.784	-0.386512	25.4934	25.6204	25.3686	25.4941	25.9312	25.826	25.8846	25.8806
G4VAI3	tr|G4VAI3|G4VAI3_SCHMA Putative co-chaperone protein HscB, mitochondrial (Hsc20) OS=Schistosoma mansoni GN=Smp_065650 PE=4 SV=1	2	32.993	0.434691	16.9363	17.4071	17.0988	17.1474	17.3707	16.3391	16.4282	16.7127
G4VAI6	tr|G4VAI6|G4VAI6_SCHMA Uncharacterized protein OS=Schistosoma mansoni GN=Smp_157590 PE=4 SV=1	13	119.8	-1.16541	17.688	17.7042	17.9143	17.7689	19.18	18.6878	18.935	18.9343
G4VAJ6	tr|G4VAJ6|G4VAJ6_SCHMA Putative rho GTPase OS=Schistosoma mansoni GN=Smp_104110 PE=3 SV=1	4	21.658	0.909535	19.5282	20.6717	19.5339	19.9113	18.9545	19.32	18.7307	19.0017
G4VAJ8	tr|G4VAJ8|G4VAJ8_SCHMA Protein kinase OS=Schistosoma mansoni GN=Smp_154440 PE=3 SV=1	2	364.57	-0.283639	12.9098	12.4379		12.6738	13.283	12.7913	12.7981	12.9575
G4VAJ9	tr|G4VAJ9|G4VAJ9_SCHMA 40S ribosomal protein S12 OS=Schistosoma mansoni GN=Smp_060090.1 PE=3 SV=1	5	14.591	-0.6978	21.9504	22.1345	21.9364	22.0071	22.8585	22.6499	22.6063	22.7049
G4VAK1	tr|G4VAK1|G4VAK1_SCHMA Putative septin OS=Schistosoma mansoni GN=Smp_060070 PE=2 SV=1	6	56.892	0.352303	19.325	19.488	19.078	19.297	19.368	18.3539	19.1122	18.9447
G4VAK2	tr|G4VAK2|G4VAK2_SCHMA Putative clathrin heavy chain OS=Schistosoma mansoni GN=Smp_191010 PE=4 SV=1	11	35.318	0.315682	21.9954	22.2352	22.1026	22.1111	21.8351	21.5462	22.0048	21.7954
G4VAK4;G4VAK3	tr|G4VAK4|G4VAK4_SCHMA Clathrin heavy chain OS=Schistosoma mansoni GN=Smp_154420.1 PE=3 SV=1;tr|G4VAK3|G4VAK3_SCHMA Putative clathrin heavy chain OS=Schistosoma mansoni GN=Smp_154420.2 PE=4 SV=1	48	153.11	0.260235	21.9841	22.1273	22.2117	22.1077	21.9925	21.4468	22.1032	21.8475
G4VAK6	tr|G4VAK6|G4VAK6_SCHMA Putative ubx domain containing protein OS=Schistosoma mansoni GN=Smp_060010 PE=4 SV=1	6	43.208	0.804047	20.7578	20.5463	20.4762	20.5934	19.6317	20.0711	19.6655	19.7894
G4VAL2	tr|G4VAL2|G4VAL2_SCHMA Putative leucyl-tRNA synthetase OS=Schistosoma mansoni GN=Smp_194160 PE=3 SV=1	20	134.65	-1.12598	17.3572	18.1498	18.0301	17.8457	18.9831	18.9042	19.0276	18.9716
G4VAL3	tr|G4VAL3|G4VAL3_SCHMA Putative sodium/potassium-transporting ATPase subunit beta (Sodium/potassium-dependent ATPase beta subunit) OS=Schistosoma mansoni GN=Smp_033550 PE=4 SV=1	5	23.548	0.721351	21.7878	21.6746	21.823	21.7618	20.9286	20.9509	21.2419	21.0405
G4VAM6	tr|G4VAM6|G4VAM6_SCHMA Glucose-6-phosphate 1-dehydrogenase OS=Schistosoma mansoni GN=Smp_052810 PE=3 SV=1	14	47.348	-0.596459	21.8167	21.8538	21.7271	21.7992	22.3454	22.4563	22.3853	22.3957
G4VAP5	tr|G4VAP5|G4VAP5_SCHMA Putative testis development protein nyd-sp29 OS=Schistosoma mansoni GN=Smp_136210 PE=4 SV=1	2	120.07	-0.792469	16.3434	16.8072	16.6598	16.6035	17.696	17.2529	17.239	17.396
G4VAQ2	tr|G4VAQ2|G4VAQ2_SCHMA Uncharacterized protein OS=Schistosoma mansoni GN=Smp_025860 PE=4 SV=1	6	9.0752	0.0503177	24.4241	23.8854	23.6603	23.9899	24.0155	24.274	23.5292	23.9396
G4VAQ6	tr|G4VAQ6|G4VAQ6_SCHMA Proteasome subunit beta type OS=Schistosoma mansoni GN=Smp_025800 PE=3 SV=1	8	23.157	-0.0678929	21.6957	21.7157	22.4409	21.9508	22.2943	21.5521	22.2095	22.0186
G4VAR6	tr|G4VAR6|G4VAR6_SCHMA Hypoxia upregulated 1 (Hyou1)-related OS=Schistosoma mansoni GN=Smp_088950 PE=3 SV=1	19	95.219	-0.747625	20.1512	20.2401	19.7374	20.0429	20.7931	20.5581	21.0204	20.7905
G4VAS0	tr|G4VAS0|G4VAS0_SCHMA 40S ribosomal protein SA OS=Schistosoma mansoni GN=Smp_179180 PE=3 SV=1	9	33.295	0.176141	24.0266	24.1526	24.2733	24.1509	23.8984	24.0364	23.9893	23.9747
G4VAS2	tr|G4VAS2|G4VAS2_SCHMA Uncharacterized protein OS=Schistosoma mansoni GN=Smp_081920 PE=4 SV=1	4	14.552	0.406995	23.9716	23.6531	23.1958	23.6068	23.1751	23.3385	23.0859	23.1998
G4VAS5	tr|G4VAS5|G4VAS5_SCHMA Uncharacterized protein OS=Schistosoma mansoni GN=Smp_166340 PE=4 SV=1	2	14.439	1.30641	23.104	22.489	22.5496	22.7142	21.3541	21.3576	21.5116	21.4078
G4VAS9;G4VAT0	tr|G4VAS9|G4VAS9_SCHMA Cell polarity protein OS=Schistosoma mansoni GN=Smp_104030.3 PE=4 SV=1;tr|G4VAT0|G4VAT0_SCHMA Cell polarity protein OS=Schistosoma mansoni GN=Smp_104030.2 PE=4 SV=1	5	158.5	0.590771	17.1924	17.0934	15.6471	16.6443	16.5366	15.7773	15.8467	16.0535
G4VAU5	tr|G4VAU5|G4VAU5_SCHMA Uncharacterized protein (Fragment) OS=Schistosoma mansoni GN=Smp_121940 PE=4 SV=1	7	58.195	0.382461	18.0376	17.7617	17.0907	17.63	16.6605	17.4149	17.6673	17.2475
G4VAU6	tr|G4VAU6|G4VAU6_SCHMA Uncharacterized protein OS=Schistosoma mansoni GN=Smp_121950 PE=4 SV=1	25	84.005	2.25484	22.587	22.2956	22.3465	22.4097	20.4158	19.9595	20.0894	20.1549
G4VAV1	tr|G4VAV1|G4VAV1_SCHMA Putative glycerol-3-phosphate dehydrogenase OS=Schistosoma mansoni GN=Smp_121990 PE=4 SV=1	26	75.137	-0.184741	21.867	20.9146	22.1402	21.6406	22.1768	21.5378	21.7615	21.8254
G4VAV5	tr|G4VAV5|G4VAV5_SCHMA Sh3-containing grb2-like protein 1 (Endophilin II) OS=Schistosoma mansoni GN=Smp_122030 PE=4 SV=1	5	37.32	0.245946	20.7555	20.4133	20.8001	20.6563	19.9441	20.3748	20.9121	20.4103
G4VAX2	tr|G4VAX2|G4VAX2_SCHMA Uncharacterized protein OS=Schistosoma mansoni GN=Smp_025680 PE=4 SV=1	2	24.242	-0.171076	16.1478	18.4468	19.2565	17.9504	16.9623	18.7439	18.6581	18.1214
G4VAY0	tr|G4VAY0|G4VAY0_SCHMA Tyrosine kinase OS=Schistosoma mansoni GN=Smp_173380 PE=3 SV=1	6	166.66	1.41978	17.3967	16.8993	16.6944	16.9968	14.9506	15.3185	16.4619	15.577
G4VAY2	tr|G4VAY2|G4VAY2_SCHMA Uncharacterized protein Smp_200920 OS=Schistosoma mansoni GN=Smp_200920 PE=4 SV=1	2	10.828	0.745138	20.9087	20.7213	21.5184	21.0495	20.1434	20.2883	20.4813	20.3043
G4VAZ9	tr|G4VAZ9|G4VAZ9_SCHMA Uncharacterized protein OS=Schistosoma mansoni GN=Smp_210440 PE=3 SV=1	16	56.686	-0.28304	21.6223	21.9316	22.0653	21.8731	22.0182	22.2921	22.158	22.1561
G4VB07;G4VB06	tr|G4VB07|G4VB07_SCHMA Putative alpha-actinin OS=Schistosoma mansoni GN=Smp_007270.2 PE=4 SV=1;tr|G4VB06|G4VB06_SCHMA Putative alpha-actinin OS=Schistosoma mansoni GN=Smp_007270.1 PE=4 SV=1	5	18.145	0.305212	22.4353	22.3038	22.0379	22.259	22.0289	21.9458	21.8866	21.9538
G4VB16	tr|G4VB16|G4VB16_SCHMA Uncharacterized protein OS=Schistosoma mansoni GN=Smp_007170 PE=4 SV=1	7	41.157	-0.0994438	21.2161	20.3861	20.8785	20.8269	20.8302	21.2191	20.7296	20.9263
G4VB23	tr|G4VB23|G4VB23_SCHMA Pol-related OS=Schistosoma mansoni GN=Smp_126020 PE=4 SV=1	17	62.925	-0.705288	20.383	20.4982	20.6444	20.5085	21.3446	21.0644	21.2325	21.2138
G4VB36	tr|G4VB36|G4VB36_SCHMA Uncharacterized protein OS=Schistosoma mansoni GN=Smp_173630 PE=4 SV=1	7	56.006	2.83029	20.8475	22.161	20.1198	21.0427	18.2781	17.8072	18.552	18.2124
G4VB55	tr|G4VB55|G4VB55_SCHMA Glycine amidinotransferase OS=Schistosoma mansoni GN=Smp_144220 PE=4 SV=1	14	44.483	-1.13801	21.5864	21.6371	21.6343	21.6192	22.6728	22.7799	22.8191	22.7573
G4VB57	tr|G4VB57|G4VB57_SCHMA Peptidylprolyl isomerase OS=Schistosoma mansoni GN=Smp_040500 PE=4 SV=1	10	39.397	-0.273557	18.6394	19.6282	19.9174	19.395	20.0659	19.366	19.5738	19.6686
G4VB63	tr|G4VB63|G4VB63_SCHMA Putative atp-dependent transporter OS=Schistosoma mansoni GN=Smp_040540 PE=4 SV=1	4	73.216	-0.419568		17.2872	16.5501	16.9187	17.2918	16.8987	17.8243	17.3382
G4VB69;G4VB68	tr|G4VB69|G4VB69_SCHMA Putative rab5 OS=Schistosoma mansoni GN=Smp_040570.1 PE=4 SV=1;tr|G4VB68|G4VB68_SCHMA Putative rab5 OS=Schistosoma mansoni GN=Smp_040570.2 PE=4 SV=1	10	21.918	-0.149867	23.891	23.9683	23.5737	23.811	23.9491	23.9133	24.0201	23.9608
G4VB70	tr|G4VB70|G4VB70_SCHMA Putative tensin OS=Schistosoma mansoni GN=Smp_144280 PE=4 SV=1	14	127.82	0.302424	19.7137	19.5746	19.5832	19.6239	19.3084	19.2227	19.4332	19.3214
G4VB71	tr|G4VB71|G4VB71_SCHMA Uncharacterized protein OS=Schistosoma mansoni GN=Smp_144290 PE=4 SV=1	5	79.225	-0.628103	18.9889	18.3189	17.8687	18.3922	18.7879	19.3998	18.8731	19.0203
G4VB75;G4VB73	tr|G4VB75|G4VB75_SCHMA Putative cytoplasmic dynein light chain OS=Schistosoma mansoni GN=Smp_040680 PE=4 SV=1;tr|G4VB73|G4VB73_SCHMA Uncharacterized protein Smp_200180 OS=Schistosoma mansoni GN=Smp_200180 PE=4 SV=1	5	10.327	1.59911	27.5488	27.4872	27.1583	27.3981	25.8213	25.8407	25.7349	25.799
G4VB89	tr|G4VB89|G4VB89_SCHMA Uncharacterized protein OS=Schistosoma mansoni GN=Smp_152020 PE=4 SV=1	1	106.08	0.494116	15.263	15.279	15.114	15.2187	15.4808	14.2848	14.408	14.7245
G4VB90	tr|G4VB90|G4VB90_SCHMA Putative ubiquitin-conjugating enzyme E2r OS=Schistosoma mansoni GN=Smp_055960 PE=3 SV=1	2	32.379	-0.0259307	17.2764	17.9349	17.5977	17.603	17.4754	17.6992	17.7122	17.6289
G4VBA8	tr|G4VBA8|G4VBA8_SCHMA Putative nucleolar protein c7c OS=Schistosoma mansoni GN=Smp_197020 PE=4 SV=1	6	65.617	-1.92739	14.0825	17.0102	16.1823	15.7583			17.6857	17.6857
G4VBD5;I6TMT9	tr|G4VBD5|G4VBD5_SCHMA Putative dead box ATP-dependent RNA helicase OS=Schistosoma mansoni GN=Smp_068440 PE=4 SV=1;tr|I6TMT9|I6TMT9_SCHMA Vasa-like DEAD-box RNA helicase (Fragment) OS=Schistosoma mansoni GN=vlg3 PE=2 SV=1	5	103.73	-0.378582	16.0536	16.0873	15.1542	15.765	16.5051	16.0672	15.8585	16.1436
G4VBD6	tr|G4VBD6|G4VBD6_SCHMA Uncharacterized protein OS=Schistosoma mansoni GN=Smp_028870.1 PE=4 SV=1	2	22.005	1.10621	18.3603	17.8004	19.4938	18.5515			17.4453	17.4453
G4VBF1	tr|G4VBF1|G4VBF1_SCHMA Mannose-1-phosphate guanyltransferase OS=Schistosoma mansoni GN=Smp_028730 PE=4 SV=1	8	35.084	0.139667	20.6153	20.2775	20.8024	20.565	20.5761	20.1178	20.5822	20.4254
G4VBG2	tr|G4VBG2|G4VBG2_SCHMA Putative ring finger protein 11 (Sid 1669) (Nedd4 ww domain-binding protein 2) OS=Schistosoma mansoni GN=Smp_047700 PE=4 SV=1	1	52.493	0.281818	17.7916	17.1002	17.807	17.5663	17.0837		17.4852	17.2844
G4VBG4	tr|G4VBG4|G4VBG4_SCHMA Ferritin OS=Schistosoma mansoni GN=Smp_047680 PE=3 SV=1	1	19.89	F only	17.8537	18.3662	17.3059	17.8419				N/A
G4VBG5	tr|G4VBG5|G4VBG5_SCHMA Ferritin OS=Schistosoma mansoni GN=Smp_047660 PE=3 SV=1	6	20.934	1.32868	22.9268	23.8173	23.3121	23.3521	22.1132	22.3513	21.6057	22.0234
G4VBG8	tr|G4VBG8|G4VBG8_SCHMA Putative adp-ribosylglycohydrolase OS=Schistosoma mansoni GN=Smp_147630 PE=4 SV=1	5	39.532	0.0433756	18.4409	18.6889	18.0244	18.3847	17.9506	18.7217	18.3518	18.3414
G4VBH2	tr|G4VBH2|G4VBH2_SCHMA Uncharacterized protein OS=Schistosoma mansoni GN=Smp_210320 PE=4 SV=1	1	39.852	0.755572	17.2261	17.3503	17.2836	17.2867	16.2479	16.5143	16.8311	16.5311
G4VBH5	tr|G4VBH5|G4VBH5_SCHMA Putative peptide chain release factor OS=Schistosoma mansoni GN=Smp_211090 PE=4 SV=1	5	49.071	-0.637007	17.3762	18.2816	18.1876	17.9484	18.4303	18.6716	18.6544	18.5855
G4VBI3	tr|G4VBI3|G4VBI3_SCHMA Putative snare protein ykt6 OS=Schistosoma mansoni GN=Smp_047450 PE=3 SV=1	2	22.752	0.343178	18.8184	19.3537	19.261	19.1444	19.1454	18.4976	18.7606	18.8012
G4VBJ0	tr|G4VBJ0|G4VBJ0_SCHMA Malate dehydrogenase OS=Schistosoma mansoni GN=Smp_047370 PE=3 SV=1	17	36.328	-1.1483	25.646	25.501	26.2315	25.7928	27.0367	26.8255	26.9612	26.9412
G4VBJ1;G4VBJ2	tr|G4VBJ1|G4VBJ1_SCHMA Ubx6(Yeast)-related OS=Schistosoma mansoni GN=Smp_047360.2 PE=4 SV=1;tr|G4VBJ2|G4VBJ2_SCHMA Ubx6(Yeast)-related OS=Schistosoma mansoni GN=Smp_047360.1 PE=4 SV=1	5	34.608	0.318842	20.2851	20.0694	19.3895	19.9147	19.5032	19.8454	19.4389	19.5958
G4VBM7	tr|G4VBM7|G4VBM7_SCHMA Protein RER1 OS=Schistosoma mansoni GN=Smp_099690 PE=3 SV=1	2	22.8	0.257088	18.0753	17.3138	18.2107	17.8666	17.8408	17.8404	17.1474	17.6095
G4VBN1	tr|G4VBN1|G4VBN1_SCHMA Fragile X related 1, frx1 OS=Schistosoma mansoni GN=Smp_099630 PE=4 SV=1	11	65.843	-0.794947	19.028	19.3933	19.676	19.3658	20.1811	19.9504	20.3506	20.1607
G4VBN6	tr|G4VBN6|G4VBN6_SCHMA Succinate--CoA ligase [GDP-forming] subunit beta, mitochondrial OS=Schistosoma mansoni GN=Smp_060820 PE=3 SV=1	3	47.941	-1.28829	15.8046		16.4216	16.1131	17.1999	17.5666	17.4376	17.4014
G4VBP6	tr|G4VBP6|G4VBP6_SCHMA Putative small nuclear ribonucleoprotein f (Snrnp-f) OS=Schistosoma mansoni GN=Smp_060910 PE=3 SV=1	3	9.685	1.57013	21.4495	19.0049	19.7647	20.073	17.6949	19.311		18.5029
G4VBQ1	tr|G4VBQ1|G4VBQ1_SCHMA Putative soluble NSF attachment protein (SNAP) OS=Schistosoma mansoni GN=Smp_060950 PE=4 SV=1	13	32.485	0.0784311	21.9234	21.8572	22.0994	21.96	21.7834	21.9447	21.9165	21.8816
G4VBQ9	tr|G4VBQ9|G4VBQ9_SCHMA Putative f-actin capping protein beta subunit (Fragment) OS=Schistosoma mansoni GN=Smp_100370 PE=4 SV=1	4	6.1999	0.156036	22.817	22.7451	22.5118	22.6913	22.3639	22.7497	22.4921	22.5352
G4VBR8	tr|G4VBR8|G4VBR8_SCHMA Uncharacterized protein OS=Schistosoma mansoni GN=Smp_045300 PE=4 SV=1	7	21.464	-1.18573	20.8149	21.0005	20.4399	20.7517	21.9415	22.1549	21.7161	21.9375
G4VBS3	tr|G4VBS3|G4VBS3_SCHMA Putative myosin light chain 1 OS=Schistosoma mansoni GN=Smp_045220 PE=4 SV=1	12	12.283	-0.239092	26.7264	26.1892	26.049	26.3215	26.5911	26.6525	26.4383	26.5606
G4VBT2;G4VBT0;G4VBT1;G4VBS9	tr|G4VBT2|G4VBT2_SCHMA Putative serine/arginine rich splicing factor OS=Schistosoma mansoni GN=Smp_113620.1 PE=4 SV=1;tr|G4VBT0|G4VBT0_SCHMA Putative serine/arginine rich splicing factor OS=Schistosoma mansoni GN=Smp_113620.2 PE=4 SV=1;tr|G4VBT1|G4VBT1_SCH	3	11.963	0.546124	21.4299	21.8113	20.684	21.3084	20.7689	20.6402	20.8778	20.7623
G4VBT5	tr|G4VBT5|G4VBT5_SCHMA Putative f-actin capping protein beta subunit OS=Schistosoma mansoni GN=Smp_186650 PE=4 SV=1	5	27.082	-0.144008	21.0703	21.5175	21.3953	21.3277	21.4074	21.4757	21.532	21.4717
G4VBU3;G4VBU2	tr|G4VBU3|G4VBU3_SCHMA Uncharacterized protein Smp_014570.2 OS=Schistosoma mansoni GN=Smp_014570.2 PE=4 SV=1;tr|G4VBU2|G4VBU2_SCHMA Saposin containing protein OS=Schistosoma mansoni GN=Smp_014570.1 PE=4 SV=1	7	24.165	1.15476	23.1176	23.1425	23.0428	23.1009	22.2873	21.7622	21.789	21.9462
G4VBU4	tr|G4VBU4|G4VBU4_SCHMA Saposin containing protein OS=Schistosoma mansoni GN=Smp_130100 PE=4 SV=1	3	14.771	3.13153	21.8464	20.7576	20.8313	21.1451	17.7327		18.2944	18.0136
G4VBU6	tr|G4VBU6|G4VBU6_SCHMA Proteasome endopeptidase complex OS=Schistosoma mansoni GN=Smp_207080 PE=3 SV=1	8	25.711	0.0465655	21.688	22.0063	21.029	21.5745	21.4422	21.5592	21.5823	21.5279
G4VBU8	tr|G4VBU8|G4VBU8_SCHMA Putative translation initiation factor eif-2b beta subunit OS=Schistosoma mansoni GN=Smp_014620 PE=3 SV=1	6	40.665	-2.08535	17.8193	16.0146	16.9452	16.9264	19.2724	18.6702	19.0925	19.0117
G4VBV1	tr|G4VBV1|G4VBV1_SCHMA 40S ribosomal protein S30 OS=Schistosoma mansoni GN=Smp_014650 PE=3 SV=1	1	14.695	0.318783	22.3226	22.0114	21.6628	21.9989	22.0764	21.8862	21.0778	21.6801
G4VBV6;G4VBV5	tr|G4VBV6|G4VBV6_SCHMA Adducin related protein OS=Schistosoma mansoni GN=Smp_014670.1 PE=4 SV=1;tr|G4VBV5|G4VBV5_SCHMA Adducin related protein OS=Schistosoma mansoni GN=Smp_014670.2 PE=4 SV=1	11	85.67	-0.528221	19.9045	20.0319	20.2149	20.0504	20.7996	20.3342	20.6022	20.5787
G4VBW4;G4VBW5	tr|G4VBW4|G4VBW4_SCHMA Putative alpha-actinin OS=Schistosoma mansoni GN=Smp_014780.2 PE=4 SV=1;tr|G4VBW5|G4VBW5_SCHMA Putative alpha-actinin OS=Schistosoma mansoni GN=Smp_014780.1 PE=4 SV=1	32	104.94	0.297174	22.8214	22.8703	22.1581	22.6166	22.208	22.3443	22.406	22.3194
G4VBW8;G4VBW9	tr|G4VBW8|G4VBW8_SCHMA Actin-related protein 2, arp2 OS=Schistosoma mansoni GN=Smp_101290.2 PE=3 SV=1;tr|G4VBW9|G4VBW9_SCHMA Actin-related protein 2, arp2 OS=Schistosoma mansoni GN=Smp_101290.1 PE=3 SV=1	10	43.435	-0.225917	21.3614	22.0873	22.0717	21.8401	21.8986	22.3109	21.9886	22.066
G4VBX0;G4VBX1	tr|G4VBX0|G4VBX0_SCHMA PRA1 family protein OS=Schistosoma mansoni GN=Smp_014800.1 PE=3 SV=1;tr|G4VBX1|G4VBX1_SCHMA PRA1 family protein OS=Schistosoma mansoni GN=Smp_014800.2 PE=3 SV=1	1	16.306	0.00188919	19.1896	19.3491	19.4432	19.3273	19.3903	19.233	19.353	19.3254
G4VBY2;G4VBY1	tr|G4VBY2|G4VBY2_SCHMA Putative sumo-1-activating enzyme E1a OS=Schistosoma mansoni GN=Smp_048760.1 PE=4 SV=1;tr|G4VBY1|G4VBY1_SCHMA Putative sumo-1-activating enzyme E1a OS=Schistosoma mansoni GN=Smp_048760.2 PE=4 SV=1	4	39.189	2.06824	18.2998	18.1309	17.9755	18.1354	16.1354	16.0714	15.9947	16.0672
G4VBY8	tr|G4VBY8|G4VBY8_SCHMA Uncharacterized protein OS=Schistosoma mansoni GN=Smp_048830 PE=4 SV=1	2	10.98	-0.55936	20.3057	19.2552		19.7804	20.8174	19.6403	20.5616	20.3398
G4VBZ1	tr|G4VBZ1|G4VBZ1_SCHMA Uncharacterized protein OS=Schistosoma mansoni GN=Smp_148320 PE=4 SV=1	1	16.186	-0.4562		19.9971		19.9971	20.3461	20.1876	20.8262	20.4533
G4VBZ2	tr|G4VBZ2|G4VBZ2_SCHMA Divalent cation tolerance cuta-related OS=Schistosoma mansoni GN=Smp_048870 PE=4 SV=1	1	14.517	-0.22667	19.0571	18.4032	18.1996	18.5533	19.0451	19.0058	18.2891	18.78
G4VBZ3	tr|G4VBZ3|G4VBZ3_SCHMA Uncharacterized protein OS=Schistosoma mansoni GN=Smp_048880 PE=4 SV=1	4	13.373	-0.70317	20.6251	20.5939	20.4958	20.5716	21.3952	21.0361	21.3931	21.2748
G4VBZ8	tr|G4VBZ8|G4VBZ8_SCHMA Williams-beuren syndrome critical region protein-related OS=Schistosoma mansoni GN=Smp_048940 PE=4 SV=1	2	25.75	-0.143027	19.3697	19.3672	19.0003	19.2457	19.0286	19.5171	19.6205	19.3887
G4VBZ9	tr|G4VBZ9|G4VBZ9_SCHMA Putative uveal autoantigen with coiled-coil domains and ankyrin repeats protein (Beta-actin-binding protein) (BetaCAP73) OS=Schistosoma mansoni GN=Smp_148370 PE=4 SV=1	2	164.66	-0.420683	14.667	13.7516	14.044	14.1542	15.1351	14.2704	14.3192	14.5749
G4VC04	tr|G4VC04|G4VC04_SCHMA Rna-binding protein related OS=Schistosoma mansoni GN=Smp_049010 PE=4 SV=1	2	69.59	-0.225127	17.4948	17.614	16.4788	17.1959	16.7315	17.8141	17.7175	17.421
G4VC11	tr|G4VC11|G4VC11_SCHMA Putative chitinase OS=Schistosoma mansoni GN=Smp_148450 PE=4 SV=1	6	49.215	-0.17442	18.6521	19.5856	19.5027	19.2468	19.088	19.5109	19.6648	19.4212
G4VC15	tr|G4VC15|G4VC15_SCHMA Aspartate aminotransferase OS=Schistosoma mansoni GN=Smp_049150 PE=4 SV=1	12	45.644	0.437561	21.1673	21.6071	21.3649	21.3798	20.8365	21.3899	20.6003	20.9422
G4VC17	tr|G4VC17|G4VC17_SCHMA Putative camp-regulated phosphoprotein OS=Schistosoma mansoni GN=Smp_049170 PE=3 SV=1	1	14.25	0.524992	20.4626	20.2273	20.9403	20.5434	19.8207	20.2161		20.0184
G4VC21	tr|G4VC21|G4VC21_SCHMA Uncharacterized protein OS=Schistosoma mansoni GN=Smp_148510 PE=3 SV=1	8	41.774	0.179663	20.1978	20.1563	20.3999	20.2514	19.8456	20.3094	20.0601	20.0717
G4VC25	tr|G4VC25|G4VC25_SCHMA Rab GDP dissociation inhibitor OS=Schistosoma mansoni GN=Smp_094420 PE=3 SV=1	23	50.273	0.529146	24.1522	24.4982	24.6283	24.4263	23.8189	23.9718	23.9006	23.8971
G4VC26	tr|G4VC26|G4VC26_SCHMA Rab GDP dissociation inhibitor OS=Schistosoma mansoni GN=Smp_024520 PE=3 SV=1	17	50.729	-0.472563	22.7337	23.0469	22.7805	22.8537	23.2745	23.337	23.3674	23.3263
G4VC30	tr|G4VC30|G4VC30_SCHMA Uncharacterized protein OS=Schistosoma mansoni GN=Smp_181130 PE=4 SV=1	3	54.759	1.22133	16.6645		16.9998	16.8321	15.2737	15.9347	15.624	15.6108
G4VC40	tr|G4VC40|G4VC40_SCHMA Uncharacterized protein OS=Schistosoma mansoni GN=Smp_181070 PE=4 SV=1	3	13.997	0.433968	21.1776	21.2052	20.2205	20.8678	21.339	19.8496	20.1128	20.4338
G4VC55;Q1WL54;G4VC56	tr|G4VC55|G4VC55_SCHMA Venom allergen-like (VAL) 11 protein OS=Schistosoma mansoni GN=Smp_012350.1 PE=4 SV=1;tr|Q1WL54|Q1WL54_SCHMA Venom allergen-like protein 11 OS=Schistosoma mansoni PE=2 SV=1;tr|G4VC56|G4VC56_SCHMA Venom allergen-like (VAL) 11 protein	9	44.905	0.244691	21.133	21.2643	20.8943	21.0972	20.7055	21.0619	20.7902	20.8525
G4VC58	tr|G4VC58|G4VC58_SCHMA Ubiquitin-specific peptidase 4 (C19 family) OS=Schistosoma mansoni GN=Smp_128770 PE=3 SV=1	11	98.829	-0.670494	18.9428	19.1052	17.6007	18.5496	19.3516	18.8703	19.4383	19.2201
G4VC62	tr|G4VC62|G4VC62_SCHMA Uncharacterized protein OS=Schistosoma mansoni GN=Smp_012280 PE=4 SV=1	3	37.278	-0.372963	17.1775	17.4909	17.6635	17.444	18.4217	17.6782	17.3509	17.8169
G4VC69	tr|G4VC69|G4VC69_SCHMA Putative tryptophanyl-tRNA synthetase OS=Schistosoma mansoni GN=Smp_082860 PE=3 SV=1	11	47.067	0.148308	21.169	21.0936	21.2477	21.1701	21.0346	21.1948	20.836	21.0218
G4VC76;Q8I899	tr|G4VC76|G4VC76_SCHMA Cell polarity protein OS=Schistosoma mansoni GN=Smp_082810.2 PE=3 SV=1;tr|Q8I899|Q8I899_SCHMA Cdc42 (Fragment) OS=Schistosoma mansoni GN=Cdc42 PE=2 SV=1	3	21.839	0.376419	21.5303	22.3746	22.0707	21.9919	21.3651	21.9686	21.5128	21.6155
G4VC78	tr|G4VC78|G4VC78_SCHMA Sly1-related OS=Schistosoma mansoni GN=Smp_082800 PE=3 SV=1	13	66.719	-0.784147	18.8553	18.9715	18.8469	18.8913	19.4452	19.8674	19.7136	19.6754
G4VC82	tr|G4VC82|G4VC82_SCHMA Putative talin OS=Schistosoma mansoni GN=Smp_167010 PE=4 SV=1	11	348.53	1.86271	14.6315		16.5259	15.5787	13.8507	12.6751	14.6221	13.716
G4VC85	tr|G4VC85|G4VC85_SCHMA Putative pdz domain containing protein OS=Schistosoma mansoni GN=Smp_082740 PE=4 SV=1	3	29.125	3.54988	18.5274	19.032	19.209	18.9228			15.3729	15.3729
G4VC95	tr|G4VC95|G4VC95_SCHMA Farnesylated-protein converting enzyme 1 (M48 family) OS=Schistosoma mansoni GN=Smp_082620 PE=4 SV=1	9	54.93	0.776908	20.3462	20.3363	19.4576	20.0467	19.0621	18.7451	20.0022	19.2698
G4VC98	tr|G4VC98|G4VC98_SCHMA ADP-ribosylation factor-like 10, arl10 OS=Schistosoma mansoni GN=Smp_166930 PE=3 SV=1	4	21.227	0.0619521	19.6979	20.3392	20.0164	20.0178	19.9463	19.5974	20.3239	19.9558
G4VC99	tr|G4VC99|G4VC99_SCHMA Uncharacterized protein (Fragment) OS=Schistosoma mansoni GN=Smp_166920 PE=4 SV=1	3	30.723	-0.788313	17.4165	18.9191	18.6233	18.3196	19.0686	19.1976	19.0576	19.108
G4VCA3	tr|G4VCA3|G4VCA3_SCHMA Uncharacterized protein OS=Schistosoma mansoni GN=Smp_156510 PE=4 SV=1	3	49.367	-0.506236	18.201	18.1302	17.2171	17.8494	17.941	18.8472	18.2788	18.3557
G4VCB9	tr|G4VCB9|G4VCB9_SCHMA Uncharacterized protein OS=Schistosoma mansoni GN=Smp_023170 PE=4 SV=1	2	44.249	0.550077	18.0681	18.1965	17.2813	17.8487	17.0038	16.9013	17.9906	17.2986
G4VCC0	tr|G4VCC0|G4VCC0_SCHMA V-type proton ATPase subunit F OS=Schistosoma mansoni GN=Smp_023160 PE=3 SV=1	4	13.501	0.149097	20.5901	20.4096	19.6566	20.2188	20.114	20.4778	19.6172	20.0697
G4VCF5	tr|G4VCF5|G4VCF5_SCHMA Putative eukaryotic translation initiation factor 4e OS=Schistosoma mansoni GN=Smp_001500 PE=3 SV=1	4	24.087	0.0717049	19.5551	18.7773	20.1009	19.4777	19.5498	19.1347	19.5336	19.406
G4VCF9	tr|G4VCF9|G4VCF9_SCHMA Putative beta-arrestin 1 OS=Schistosoma mansoni GN=Smp_122900 PE=4 SV=1	7	31.717	0.611516	21.3739	21.452	19.9267	20.9175	20.5377	20.8916	19.4888	20.306
G4VCG4	tr|G4VCG4|G4VCG4_SCHMA Acyl-CoA dehydrogenase OS=Schistosoma mansoni GN=Smp_122930 PE=4 SV=1	6	62.852	-1.02995	16.553	16.0473	16.6987	16.433	16.881	17.6906	17.8173	17.4629
G4VCG8	tr|G4VCG8|G4VCG8_SCHMA V-type proton ATPase subunit G OS=Schistosoma mansoni GN=Smp_001640 PE=3 SV=1	3	13.806	0.507235	20.684	21.0775	20.7382	20.8332	20.4629	20.1704	20.3447	20.326
G4VCH8	tr|G4VCH8|G4VCH8_SCHMA Putative cationic amino acid transporter OS=Schistosoma mansoni GN=Smp_123010 PE=4 SV=1	2	74.256	2.00235	18.0113	18.0824	18.1656	18.0864	16.2215	15.7653	16.2654	16.0841
G4VCI0	tr|G4VCI0|G4VCI0_SCHMA Putative centaurin alpha OS=Schistosoma mansoni GN=Smp_123030 PE=4 SV=1	7	45.686	0.74807	17.7708	17.9787	17.6008	17.7834	17.7888	16.0903	17.227	17.0354
G4VCJ0;O02034	tr|G4VCJ0|G4VCJ0_SCHMA Putative amidase OS=Schistosoma mansoni GN=Smp_004220 PE=4 SV=1;tr|O02034|O02034_SCHMA Amidase OS=Schistosoma mansoni PE=2 SV=1	9	67.867	-0.360917	17.0613	16.9947	19.5214	17.8591	19.0262	16.7714	18.8626	18.2201
G4VCJ4	tr|G4VCJ4|G4VCJ4_SCHMA Coatomer subunit beta OS=Schistosoma mansoni GN=Smp_124430 PE=4 SV=1	16	106.8	-0.357304	19.9996	20.2798	19.2624	19.8473	20.2225	20.0408	20.3504	20.2046
G4VCJ7	tr|G4VCJ7|G4VCJ7_SCHMA Uncharacterized protein OS=Schistosoma mansoni GN=Smp_004280 PE=4 SV=1	2	17.563	-1.40463	18.1424	17.1511		17.6468	19.4075	19.0223	18.7243	19.0514
G4VCJ9	tr|G4VCJ9|G4VCJ9_SCHMA Putative dihydrolipoamide succinyltransferase component of 2-oxoglutarate dehydrogenase OS=Schistosoma mansoni GN=Smp_104330 PE=4 SV=1	9	46.491	-0.984417	21.6765	21.6197	22.0233	21.7732	22.6344	22.8168	22.8216	22.7576
G4VCN1;G4VCN0	tr|G4VCN1|G4VCN1_SCHMA Putative fatty acid binding protein OS=Schistosoma mansoni GN=Smp_046800.1 PE=4 SV=1;tr|G4VCN0|G4VCN0_SCHMA Putative fatty acid binding protein OS=Schistosoma mansoni GN=Smp_046800.2 PE=4 SV=1	6	15.1	-1.14467	23.8548	24.0775	23.3152	23.7492	25.0297	24.8962	24.7556	24.8938
G4VCN8	tr|G4VCN8|G4VCN8_SCHMA Dihydrolipoyl dehydrogenase OS=Schistosoma mansoni GN=Smp_046740 PE=3 SV=1	17	52.868	-1.07689	22.9609	22.8132	23.2183	22.9975	24.0559	24.0744	24.0928	24.0744
G4VCQ7	tr|G4VCQ7|G4VCQ7_SCHMA Putative aldehyde dehydrogenase OS=Schistosoma mansoni GN=Smp_065060 PE=4 SV=1	16	56.327	-0.323432	21.6554	21.8575	21.5014	21.6714	21.9102	22.0303	22.0441	21.9949
G4VCR0	tr|G4VCR0|G4VCR0_SCHMA Putative lim domain OS=Schistosoma mansoni GN=Smp_157310 PE=4 SV=1	4	47.98	M only				N/A	19.0299	18.5708	17.7705	18.4571
G4VCR1	tr|G4VCR1|G4VCR1_SCHMA Putative leucine zipper-ef-hand containing transmembrane protein OS=Schistosoma mansoni GN=Smp_065110 PE=4 SV=1	19	90.046	-0.774757	19.7064	18.8238	20.2178	19.5827	20.5833	19.9687	20.5203	20.3574
G4VCS0	tr|G4VCS0|G4VCS0_SCHMA Eh domain containing/past-1-related OS=Schistosoma mansoni GN=Smp_065180 PE=3 SV=1	11	58.078	0.150305	19.8401	19.6615	19.3665	19.6227	19.6485	19.4903	19.2783	19.4724
G4VCS1	tr|G4VCS1|G4VCS1_SCHMA Uncharacterized protein OS=Schistosoma mansoni GN=Smp_065190.2 PE=4 SV=1	3	26.351	0.786711	20.8975	20.699	20.9944	20.8636	19.9206	20.0224	20.2878	20.0769
G4VCS4;G4VCS5;G4VCS6	tr|G4VCS4|G4VCS4_SCHMA Uncharacterized protein OS=Schistosoma mansoni GN=Smp_065210.2 PE=4 SV=1;tr|G4VCS5|G4VCS5_SCHMA Uncharacterized protein OS=Schistosoma mansoni GN=Smp_065210.4 PE=4 SV=1;tr|G4VCS6|G4VCS6_SCHMA Uncharacterized protein OS=Schistosoma ma	7	35.15	-0.747493	21.1468	21.109	20.3109	20.8556	21.4314	21.5907	21.7871	21.603
G4VCT1	tr|G4VCT1|G4VCT1_SCHMA Uncharacterized protein OS=Schistosoma mansoni GN=Smp_065280 PE=4 SV=1	2	12.723	-0.579587	21.0867	21.0472	20.3929	20.8423	21.4109	21.5603	21.2944	21.4218
G4VCT2	tr|G4VCT2|G4VCT2_SCHMA Putative calcium/calmodulin-dependent protein kinase OS=Schistosoma mansoni GN=Smp_065290 PE=3 SV=1	9	48.01	-0.112221	19.7343	19.8484	19.9952	19.8593	19.9291	20.1364	19.849	19.9715
G4VCT4	tr|G4VCT4|G4VCT4_SCHMA Uncharacterized protein OS=Schistosoma mansoni GN=Smp_157380 PE=4 SV=1	35	308.01	4.85139	22.5534	22.5514	23.0324	22.7124	18.5541	17.2488	17.7802	17.861
G4VCT5	tr|G4VCT5|G4VCT5_SCHMA Uncharacterized protein (Fragment) OS=Schistosoma mansoni GN=Smp_184180 PE=4 SV=1	1	39.63	5.39534	19.9765	19.7433	20.2346	19.9848	14.5895			14.5895
G4VCT8	tr|G4VCT8|G4VCT8_SCHMA Uncharacterized protein OS=Schistosoma mansoni GN=Smp_157410 PE=4 SV=1	65	529.79	0.683635	18.4733	16.9984	19.4812	18.3176	18.8295	16.7573	17.3151	17.634
G4VCW5	tr|G4VCW5|G4VCW5_SCHMA MEG-8 family OS=Schistosoma mansoni GN=Smp_171190 PE=4 SV=1	3	20.959	-2.70837			18.3711	18.3711	20.7005	21.3843	21.1535	21.0794
G4VCW8	tr|G4VCW8|G4VCW8_SCHMA Phosphatase 2a regulatory subunit-related OS=Schistosoma mansoni GN=Smp_089930 PE=4 SV=1	2	96.155	0.285152	14.7654	15.6476	15.1056	15.1729	14.9226	14.8529		14.8877
G4VCY0	tr|G4VCY0|G4VCY0_SCHMA Strictosidine synthase-related OS=Schistosoma mansoni GN=Smp_161220 PE=4 SV=1	3	41.734	0.764183	18.3833	19.1627	19.7261	19.0907	17.9616	18.5233	18.4946	18.3265
G4VCY4	tr|G4VCY4|G4VCY4_SCHMA 6-phosphogluconate dehydrogenase, decarboxylating OS=Schistosoma mansoni GN=Smp_071840 PE=3 SV=1	14	41.761	-0.383436	22.9824	23.1654	23.4621	23.2033	23.4919	23.6265	23.6418	23.5867
G4VD08	tr|G4VD08|G4VD08_SCHMA Putative ran gtpase-activating protein OS=Schistosoma mansoni GN=Smp_166310 PE=4 SV=1	8	81.26	-1.45143	16.2861	15.2597	14.8406	15.4622	17.0891	16.7223	16.9294	16.9136
G4VD10	tr|G4VD10|G4VD10_SCHMA Serine/threonine-protein phosphatase 2A activator OS=Schistosoma mansoni GN=Smp_166290 PE=3 SV=1	5	42.051	0.214274	20.0384	20.3385	20.4896	20.2888	20.1237	20.264	19.836	20.0746
G4VD16	tr|G4VD16|G4VD16_SCHMA Uncharacterized protein OS=Schistosoma mansoni GN=Smp_023940 PE=4 SV=1	7	168.7	-1.85581	13.4762	14.9433		14.2098	16.2395	15.3731	16.5841	16.0656
G4VD23;G4VD22	tr|G4VD23|G4VD23_SCHMA Putative microtubule-associated protein OS=Schistosoma mansoni GN=Smp_135080.2 PE=4 SV=1;tr|G4VD22|G4VD22_SCHMA Putative microtubule-associated protein OS=Schistosoma mansoni GN=Smp_135080.1 PE=4 SV=1	23	98.903	-0.467018	22.1002	22.0691	22.0189	22.0628	22.6882	22.4754	22.4258	22.5298
G4VD32	tr|G4VD32|G4VD32_SCHMA Phosphodiesterase OS=Schistosoma mansoni GN=Smp_044060 PE=3 SV=1	4	54.566	-1.80202	15.7959	15.8101	14.2406	15.2822	16.5019	17.6388	17.1121	17.0843
G4VD41;G4VD40;G4VD39	tr|G4VD41|G4VD41_SCHMA Basigin related OS=Schistosoma mansoni GN=Smp_043990.2 PE=4 SV=1;tr|G4VD40|G4VD40_SCHMA Basigin related OS=Schistosoma mansoni GN=Smp_043990.3 PE=4 SV=1;tr|G4VD39|G4VD39_SCHMA Basigin related OS=Schistosoma mansoni GN=Smp_043990.1 PE	4	39.054	-0.189112	18.7832	19.1069	19.117	19.0023	19.0943	18.9427	19.5374	19.1915
G4VD44	tr|G4VD44|G4VD44_SCHMA Tetraspanin OS=Schistosoma mansoni GN=Smp_173150 PE=3 SV=1	2	24.133	1.24335	21.1737	20.3175	20.4724	20.6545	19.2593	19.568	19.4063	19.4112
G4VD59;G4VD58;Q7JQ21;Q26583;G4VD60	tr|G4VD59|G4VD59_SCHMA Peptidylprolyl isomerase OS=Schistosoma mansoni GN=Smp_004780.1 PE=4 SV=1;tr|G4VD58|G4VD58_SCHMA Peptidylprolyl isomerase OS=Schistosoma mansoni GN=Smp_004780.2 PE=4 SV=1;tr|Q7JQ21|Q7JQ21_SCHMA Peptidylprolyl isomerase OS=Schistosoma	23	48.123	0.0699235	23.146	23.0674	23.3113	23.1749	23.1421	23.1011	23.0717	23.105
G4VD74;G4VD73	tr|G4VD74|G4VD74_SCHMA Uncharacterized protein OS=Schistosoma mansoni GN=Smp_128280.2 PE=4 SV=1;tr|G4VD73|G4VD73_SCHMA Uncharacterized protein OS=Schistosoma mansoni GN=Smp_128280.1 PE=4 SV=1	8	76.678	0.61496	17.7462	17.2561	17.481	17.4944	17.0932	17.1789	16.3664	16.8795
G4VD77	tr|G4VD77|G4VD77_SCHMA Uncharacterized protein OS=Schistosoma mansoni GN=Smp_128230 PE=4 SV=1	3	59.456	-0.210223	17.3043	17.5464	16.554	17.1349	17.2822	17.4513	17.3019	17.3451
G4VD85;G4VD84;G4VD83	tr|G4VD85|G4VD85_SCHMA Putative sj-Ts4 protein OS=Schistosoma mansoni GN=Smp_011270.3 PE=4 SV=1;tr|G4VD84|G4VD84_SCHMA Putative sj-Ts4 protein OS=Schistosoma mansoni GN=Smp_011270.1 PE=4 SV=1;tr|G4VD83|G4VD83_SCHMA Putative sj-Ts4 protein OS=Schistosoma ma	6	29.68	-0.517239	19.2552	18.2399	19.1609	18.8853	19.6652	18.2851	20.2574	19.4026
G4VD88	tr|G4VD88|G4VD88_SCHMA Glycosylphosphatidylinositol:protein transamidase (C13 family) OS=Schistosoma mansoni GN=Smp_011230 PE=4 SV=1	2	27.913	-2.19355	13.9408	15.7546	15.3875	15.0276	17.6181	17.0313	17.014	17.2211
G4VD99	tr|G4VD99|G4VD99_SCHMA Methionine aminopeptidase 2 OS=Schistosoma mansoni GN=Smp_011120 PE=3 SV=1	5	51.94	-0.162803	18.2135	18.1329	17.4886	17.945	18.0152	18.1464	18.1617	18.1078
G4VDB2	tr|G4VDB2|G4VDB2_SCHMA Putative rab geranylgeranyl transferase alpha subunit OS=Schistosoma mansoni GN=Smp_208010 PE=4 SV=1	5	74.594	-0.329441	15.9085	15.1982	16.3076	15.8048	16.7685	15.8365	15.7975	16.1342
G4VDC1	tr|G4VDC1|G4VDC1_SCHMA Uncharacterized protein OS=Schistosoma mansoni GN=Smp_125480 PE=4 SV=1	4	56.504	-0.226004	19.1723	18.9541	18.9099	19.0121	19.2502	19.5373	18.9268	19.2381
G4VDC3	tr|G4VDC3|G4VDC3_SCHMA Uncharacterized protein OS=Schistosoma mansoni GN=Smp_125500 PE=4 SV=1	7	56.532	-0.268835	18.5161	16.781	18.8823	18.0598	18.4588	18.1823	18.3448	18.3286
G4VDD2	tr|G4VDD2|G4VDD2_SCHMA Eukaryotic translation initiation factor 5A OS=Schistosoma mansoni GN=Smp_039400 PE=3 SV=1	6	17.752	-0.187583	23.3218	23.1137	22.5739	23.0031	23.2621	23.433	22.877	23.1907
G4VDE6;G4VDE5	tr|G4VDE6|G4VDE6_SCHMA Spectrin beta chain OS=Schistosoma mansoni GN=Smp_143470.2 PE=3 SV=1;tr|G4VDE5|G4VDE5_SCHMA Putative spectrin beta chain, brain 3 (Spectrin, non-erythroid beta chain 3) (Beta-IV spectrin) OS=Schistosoma mansoni GN=Smp_143470.1 PE=4 S	108	270.81	-0.322117	23.8056	23.8462	23.6185	23.7568	24.116	23.9334	24.1873	24.0789
G4VDF4	tr|G4VDF4|G4VDF4_SCHMA Putative translation initiation factor IF-2 OS=Schistosoma mansoni GN=Smp_006990 PE=4 SV=1	2	73.622	0.323052	15.1689	15.3462	17.9161	16.1437	16.1392	15.8115	15.5114	15.8207
G4VDG3;G4VDG2;G4VDG1	tr|G4VDG3|G4VDG3_SCHMA Proteasome subunit alpha type OS=Schistosoma mansoni GN=Smp_032580.2 PE=3 SV=1;tr|G4VDG2|G4VDG2_SCHMA Proteasome subunit alpha type OS=Schistosoma mansoni GN=Smp_032580.3 PE=3 SV=1;tr|G4VDG1|G4VDG1_SCHMA Proteasome subunit alpha type	13	27.27	-0.0912805	22.7164	23.0312	22.6819	22.8098	22.8726	23.0231	22.8077	22.9011
G4VDG5	tr|G4VDG5|G4VDG5_SCHMA Putative ubiquitin-protein ligase BRE1 OS=Schistosoma mansoni GN=Smp_139810 PE=4 SV=1	27	193.06	-0.358203	21.7303	21.4182	21.1296	21.426	21.7952	21.7306	21.8269	21.7842
G4VDH7	tr|G4VDH7|G4VDH7_SCHMA Putative ribosomal protein S11 OS=Schistosoma mansoni GN=Smp_032760 PE=3 SV=1	6	16.865	0.517912	22.0229	20.9908	22.049	21.6876	21.8093	20.7207	20.9789	21.1697
G4VDI4	tr|G4VDI4|G4VDI4_SCHMA Thymidylate kinase OS=Schistosoma mansoni GN=Smp_032810 PE=3 SV=1	12	26.687	-0.165659	21.8831	22.22	21.9993	22.0341	22.0946	22.371	22.1337	22.1998
G4VDI7	tr|G4VDI7|G4VDI7_SCHMA Putative lysophosphatidic acid phosphatase OS=Schistosoma mansoni GN=Smp_139900 PE=3 SV=1	7	27.477	0.106416	21.3505	20.8653	21.3853	21.2004	21.3292	21.0281	20.9245	21.0939
G4VDI8	tr|G4VDI8|G4VDI8_SCHMA Cdc50-related OS=Schistosoma mansoni GN=Smp_210240 PE=4 SV=1	3	20.328	-0.759255	19.6163	21.0625	21.4293	20.7027	21.5721	21.2416	21.5722	21.462
G4VDJ0	tr|G4VDJ0|G4VDJ0_SCHMA Cdc50-related OS=Schistosoma mansoni GN=Smp_210250 PE=4 SV=1	4	36.865	0.389041	18.7984	18.3329	18.6358	18.589	18.1875	18.3095	18.103	18.2
G4VDJ6	tr|G4VDJ6|G4VDJ6_SCHMA Putative adp-ribosylation factor, arf OS=Schistosoma mansoni GN=Smp_088650 PE=3 SV=1	8	20.748	-0.17935	22.0941	22.1927	21.9724	22.0864	22.2763	22.2308	22.2902	22.2658
G4VDJ9	tr|G4VDJ9|G4VDJ9_SCHMA VPS13C protein, putative OS=Schistosoma mansoni GN=Smp_021170 PE=4 SV=1	5	398.25	-0.249327	13.8308	12.9746	14.8456	13.8837	13.8966		14.3694	14.133
G4VDK2	tr|G4VDK2|G4VDK2_SCHMA 40S ribosomal protein S7 OS=Schistosoma mansoni GN=Smp_021140 PE=3 SV=1	5	23.084	0.204719	20.9559	20.9237	21.4136	21.0977	21.2629	20.6904	20.7257	20.893
G4VDL3	tr|G4VDL3|G4VDL3_SCHMA Putative utp-glucose-1-phosphate uridylyltransferase 2 (Udp-glucose pyrophosphorylase 2) OS=Schistosoma mansoni GN=Smp_133600 PE=4 SV=1	15	52.728	-0.435097	23.0474	22.7734	22.8968	22.9059	23.4133	23.3733	23.2362	23.341
G4VDM4	tr|G4VDM4|G4VDM4_SCHMA Serine/threonine kinase OS=Schistosoma mansoni GN=Smp_047900 PE=4 SV=1	3	23.599	0.299316	19.119	19.4639	19.4092	19.3307	19.0469	18.8447	19.2026	19.0314
G4VDN2	tr|G4VDN2|G4VDN2_SCHMA Putative cytosolic purine 5-nucleotidase OS=Schistosoma mansoni GN=Smp_147840 PE=4 SV=1	22	62.265	-1.26519	21.6347	21.0478	21.5127	21.3984	22.8704	22.6836	22.4368	22.6636
G4VDP3	tr|G4VDP3|G4VDP3_SCHMA Putative myosin regulatory light chain 2 smooth muscle OS=Schistosoma mansoni GN=Smp_103000.1 PE=4 SV=1	2	8.6316	-1.36902	17.7677			17.7677	18.9572	19.1525	19.3004	19.1367
G4VDP7	tr|G4VDP7|G4VDP7_SCHMA Glyoxalase I (Lactoylglutathione lyase) OS=Schistosoma mansoni GN=Smp_001410.1 PE=4 SV=1	11	28.227	0.225721	23.5789	24.1155	23.761	23.8185	23.5913	23.4892	23.6978	23.5927
G4VDQ6	tr|G4VDQ6|G4VDQ6_SCHMA Uncharacterized protein OS=Schistosoma mansoni GN=Smp_170450 PE=3 SV=1	3	67.552	-0.233687	18.2899	17.8526	17.0623	17.7349	18.2362	17.3462	18.3235	17.9686
G4VDR2	tr|G4VDR2|G4VDR2_SCHMA Putative ubiquitin-conjugating enzyme E2-25kD OS=Schistosoma mansoni GN=Smp_082050 PE=3 SV=1	4	24.845	-0.462177	20.1953	20.1987	18.1281	19.5073	20.138	20.3334	19.4371	19.9695
G4VDR4	tr|G4VDR4|G4VDR4_SCHMA Family C56 non-peptidase homologue (C56 family) OS=Schistosoma mansoni GN=Smp_082030 PE=4 SV=1	11	19.091	-0.0435585	25.8505	25.5517	25.5629	25.655	25.7447	25.8891	25.462	25.6986
G4VDR7	tr|G4VDR7|G4VDR7_SCHMA Putative dead box ATP-dependent RNA helicase OS=Schistosoma mansoni GN=Smp_166400 PE=3 SV=1	4	38.791	1.32757	18.1376	15.7065	17.8104	17.2182	15.7556	15.8279	16.0883	15.8906
G4VDS8;G4VDS7	tr|G4VDS8|G4VDS8_SCHMA Putative chromobox protein OS=Schistosoma mansoni GN=Smp_179650.2 PE=4 SV=1;tr|G4VDS7|G4VDS7_SCHMA Putative chromobox protein OS=Schistosoma mansoni GN=Smp_179650.1 PE=4 SV=1	10	27.269	1.04021	22.0485	22.1134	22.2296	22.1305	21.0458	21.0296	21.1955	21.0903
G4VDS9	tr|G4VDS9|G4VDS9_SCHMA Uncharacterized protein OS=Schistosoma mansoni GN=Smp_179660 PE=4 SV=1	10	103.41	-0.885996	17.4248	17.8601	17.3064	17.5304	18.4208	18.0471	18.7813	18.4164
G4VDT0	tr|G4VDT0|G4VDT0_SCHMA Putative gyf domain OS=Schistosoma mansoni GN=Smp_093430 PE=4 SV=1	2	122.73	-0.182112	16.6981	16.1012	16.3329	16.3774	16.6045	16.4946	16.5794	16.5595
G4VDT5	tr|G4VDT5|G4VDT5_SCHMA Family C2 unassigned peptidase (C02 family) OS=Schistosoma mansoni GN=Smp_089460.1 PE=3 SV=1	1	87.676	-0.575201	16.4948	17.0451	17.3235	16.9544	17.6073	17.508	17.4737	17.5296
G4VDT6	tr|G4VDT6|G4VDT6_SCHMA Family C2 unassigned peptidase (C02 family) OS=Schistosoma mansoni GN=Smp_089460.2 PE=3 SV=1	46	88.361	-0.0853606	23.902	23.8045	23.5277	23.7448	23.959	23.6714	23.86	23.8301
G4VDT8	tr|G4VDT8|G4VDT8_SCHMA Uncharacterized protein OS=Schistosoma mansoni GN=Smp_170950 PE=4 SV=1	2	39.5	-0.547517			15.4651	15.4651	16.3202	15.8432	15.8743	16.0126
G4VDU1	tr|G4VDU1|G4VDU1_SCHMA Putative vinculin OS=Schistosoma mansoni GN=Smp_170990 PE=4 SV=1	5	172.71	-0.811355	15.6891	14.4031	15.1835	15.0919	16.5269	14.8659	16.3168	15.9032
G4VDV2	tr|G4VDV2|G4VDV2_SCHMA Prefoldin subunit 3 OS=Schistosoma mansoni GN=Smp_021800 PE=3 SV=1	6	21.491	0.0571512	21.1095	20.6025	20.512	20.7414	20.5281	20.8552	20.6694	20.6842
G4VDZ4	tr|G4VDZ4|G4VDZ4_SCHMA Putative 60s ribosomal protein L7a OS=Schistosoma mansoni GN=Smp_210300 PE=4 SV=1	2	82.82	1.19398	16.284		17.272	16.778	16.9695	14.2319	15.5506	15.584
G4VE00	tr|G4VE00|G4VE00_SCHMA Uncharacterized protein OS=Schistosoma mansoni GN=Smp_208030 PE=4 SV=1	122	331.38	-0.224299	23.567	23.3445	23.7332	23.5483	23.825	23.5459	23.9468	23.7726
G4VE01	tr|G4VE01|G4VE01_SCHMA Uncharacterized protein OS=Schistosoma mansoni GN=Smp_146950 PE=4 SV=1	104	301.89	-0.169744	23.8672	23.6474	24.0108	23.8418	24.1013	23.7924	24.141	24.0116
G4VE02	tr|G4VE02|G4VE02_SCHMA Putative copii-coated vesicle membrane protein P24 OS=Schistosoma mansoni GN=Smp_046250 PE=3 SV=1	3	22.885	0.202568	20.0229	18.8553	20.3741	19.7508	19.5564	19.1381	19.9501	19.5482
G4VE06	tr|G4VE06|G4VE06_SCHMA Putative phosphatidylcholine transfer protein OS=Schistosoma mansoni GN=Smp_146970 PE=2 SV=1	2	18.063	0.307478	18.1393	18.2825		18.2109	18.5807	17.5185	17.6111	17.9034
G4VE11	tr|G4VE11|G4VE11_SCHMA 2-methoxy-6-polyprenyl-1,4-benzoquinol methylase, mitochondrial OS=Schistosoma mansoni GN=Smp_021910 PE=3 SV=1	2	32.821	M only				N/A	18.7146	19.0449	18.2926	18.6841
G4VE12;G4VE13	tr|G4VE12|G4VE12_SCHMA Putative paramyosin OS=Schistosoma mansoni GN=Smp_021920.1 PE=4 SV=1;tr|G4VE13|G4VE13_SCHMA Putative paramyosin OS=Schistosoma mansoni GN=Smp_021920.3 PE=4 SV=1	3	84.176	-0.113921	24.4652	23.9766	22.7596	23.7338	23.747	23.712	24.0841	23.8477
G4VE14	tr|G4VE14|G4VE14_SCHMA Putative zinc finger protein OS=Schistosoma mansoni GN=Smp_134010.1 PE=4 SV=1	7	38.821	0.104503	20.6691	20.7411	20.9938	20.8013	20.4015	20.9216	20.7674	20.6968
G4VE33	tr|G4VE33|G4VE33_SCHMA Putative ribose-phosphate pyrophosphokinase 1 OS=Schistosoma mansoni GN=Smp_022090 PE=3 SV=1	7	34.793	-0.516347	20.4208	20.6718	20.2898	20.4608	21.1142	20.9667	20.8504	20.9771
G4VE62;B9P3Q8;G4VE61	tr|G4VE62|G4VE62_SCHMA Putative alpha-amylase OS=Schistosoma mansoni GN=Smp_037540.2 PE=4 SV=1;tr|B9P3Q8|B9P3Q8_SCHMA Permease 1 heavy chain OS=Schistosoma mansoni PE=2 SV=1;tr|G4VE61|G4VE61_SCHMA Putative alpha-amylase OS=Schistosoma mansoni GN=Smp_037540	13	71.586	-0.025635	20.5101	20.6371	20.1437	20.4303	20.3584	20.3391	20.6704	20.4559
G4VE67	tr|G4VE67|G4VE67_SCHMA Putative rap1 and OS=Schistosoma mansoni GN=Smp_142450 PE=4 SV=1	4	20.774	-0.339463	21.6378	21.2579	20.2285	21.0414	21.3815	21.3668	21.3943	21.3809
G4VE73	tr|G4VE73|G4VE73_SCHMA Uncharacterized protein OS=Schistosoma mansoni GN=Smp_037640 PE=4 SV=1	4	48.679	0.539253	19.1297	19.176	19.333	19.2129	18.3593	18.5732	19.0885	18.6737
G4VE80	tr|G4VE80|G4VE80_SCHMA Nicotinate phosphoribosyltransferase related pre-B cell enhancing factor OS=Schistosoma mansoni GN=Smp_017230 PE=4 SV=1	12	52.667	0.60018	20.2014	20.6154	20.8486	20.5551	19.4117	20.376	20.0771	19.955
G4VE86;G4VE85	tr|G4VE86|G4VE86_SCHMA Uncharacterized protein OS=Schistosoma mansoni GN=Smp_017290.4 PE=4 SV=1;tr|G4VE85|G4VE85_SCHMA Uncharacterized protein OS=Schistosoma mansoni GN=Smp_017290.3 PE=4 SV=1	2	20.774	0.107764	17.8199	18.8893	17.2317	17.9803	18.1963	17.9347	17.4867	17.8726
G4VE88	tr|G4VE88|G4VE88_SCHMA Jab1/MPN domain metalloenzyme (M67 family) OS=Schistosoma mansoni GN=Smp_131660 PE=4 SV=1	3	39.06	-0.259924	16.6309	17.2485	17.6105	17.1633	18.2381	17.2795	16.752	17.4232
G4VE92;Q94757	tr|G4VE92|G4VE92_SCHMA Putative t-complex protein 1 subunit alpha (TCP-1-alpha) (CCT-alpha) OS=Schistosoma mansoni GN=Smp_017360 PE=3 SV=1;sp|Q94757|TCPA_SCHMA T-complex protein 1 subunit alpha OS=Schistosoma mansoni GN=TCP-1A PE=2 SV=1	26	60.081	0.0514369	23.5722	23.4658	23.6558	23.5646	23.4956	23.533	23.5108	23.5132
G4VE93	tr|G4VE93|G4VE93_SCHMA MAGUK homolog OS=Schistosoma mansoni GN=Smp_131690 PE=3 SV=1	3	94.796	-0.755187	15.0777	15.4985	13.9977	14.858	16.3817	15.2062	15.2515	15.6132
G4VE95	tr|G4VE95|G4VE95_SCHMA Protein kinase C OS=Schistosoma mansoni GN=Smp_131700 PE=3 SV=1	3	94.969	F only	14.815	15.2338	15.5162	15.1883				N/A
G4VEE0	tr|G4VEE0|G4VEE0_SCHMA Putative kunitz-type protease inhibitor OS=Schistosoma mansoni GN=Smp_147730 PE=4 SV=1	3	16.463	-2.45924	17.1537	18.3	18.3961	17.9499	19.9679	20.6294	20.6302	20.4092
G4VEE4	tr|G4VEE4|G4VEE4_SCHMA Putative ef hand containing protein OS=Schistosoma mansoni GN=Smp_147680 PE=4 SV=1	14	38.191	0.103163	21.9738	22.0143	21.6515	21.8799	21.5235	21.9793	21.8273	21.7767
G4VEF4;G4VEF3	tr|G4VEF4|G4VEF4_SCHMA Putative dead box ATP-dependent RNA helicase OS=Schistosoma mansoni GN=Smp_034190.1 PE=3 SV=1;tr|G4VEF3|G4VEF3_SCHMA Putative dead box ATP-dependent RNA helicase OS=Schistosoma mansoni GN=Smp_034190.2 PE=3 SV=1	6	46.005	0.497265	19.6551	19.7509	19.6273	19.6778	19.4122	18.7565	19.3728	19.1805
G4VEG1	tr|G4VEG1|G4VEG1_SCHMA Endothelial differentiation-related factor 1 OS=Schistosoma mansoni GN=Smp_140680.1 PE=4 SV=1	1	15.006	0.419577	19.9073	19.9281	19.6552	19.8302	19.4611	19.5555	19.2152	19.4106
G4VEI2	tr|G4VEI2|G4VEI2_SCHMA Acetyl-CoA C-acetyltransferase (Fragment) OS=Schistosoma mansoni GN=Smp_197330 PE=4 SV=1	9	103.1	-0.305074	19.9483	19.51	20.312	19.9235	20.3345	20.2253	20.1258	20.2285
G4VEI7	tr|G4VEI7|G4VEI7_SCHMA Putative suppressor of potassium transport defect 3 (Skd3 protein) OS=Schistosoma mansoni GN=Smp_145990 PE=4 SV=1	5	56.993	-0.698757	17.007	17.8407	16.4486	17.0988	17.2743	17.8012	18.317	17.7975
G4VEJ9	tr|G4VEJ9|G4VEJ9_SCHMA Putative adamts (A disintegrin and metalloprotease) OS=Schistosoma mansoni GN=Smp_145890 PE=4 SV=1	2	69.276	-0.135285	16.8724	16.3889	16.142	16.4678	16.3088	16.7785	16.7218	16.603
G4VEK4	tr|G4VEK4|G4VEK4_SCHMA Dihydropyrimidinase related protein-1 (M38 family) OS=Schistosoma mansoni GN=Smp_078780 PE=4 SV=1	13	64.716	-0.272946	21.1738	21.1916	21.009	21.1248	21.467	21.2725	21.4537	21.3977
G4VEK7	tr|G4VEK7|G4VEK7_SCHMA Uncharacterized protein OS=Schistosoma mansoni GN=Smp_129520 PE=4 SV=1	11	123.89	-1.41923	17.9931	17.5527	16.1243	17.2234	18.9895	18.2553	18.683	18.6426
G4VEL6	tr|G4VEL6|G4VEL6_SCHMA Farnesyl pyrophosphate synthase OS=Schistosoma mansoni GN=Smp_070710 PE=3 SV=1	9	44.864	-0.266196	18.9326	19.7607	20.0371	19.5768	19.8804	19.9218	19.7268	19.843
G4VEM1	tr|G4VEM1|G4VEM1_SCHMA UDP-glucose 4-epimerase OS=Schistosoma mansoni GN=Smp_070780 PE=3 SV=1	12	39.02	-1.60878	22.4077	22.9134	22.9403	22.7538	24.3799	24.4258	24.282	24.3626
G4VEN0;G4VEM9	tr|G4VEN0|G4VEN0_SCHMA Putative heat shock protein 70 (Hsp70) OS=Schistosoma mansoni GN=Smp_106130.2 PE=3 SV=1;tr|G4VEM9|G4VEM9_SCHMA Putative heat shock protein 70 (Hsp70) OS=Schistosoma mansoni GN=Smp_106130.1 PE=3 SV=1	32	71.382	-0.77825	23.6682	23.8377	23.7366	23.7475	24.429	24.4431	24.7053	24.5258
G4VEN3	tr|G4VEN3|G4VEN3_SCHMA Uncharacterized protein OS=Schistosoma mansoni GN=Smp_181460 PE=4 SV=1	3	50.808	1.15906	18.0801	17.1901	16.9542	17.4081	16.9491	15.8468	15.9512	16.2491
G4VEN7	tr|G4VEN7|G4VEN7_SCHMA Mitochondrial carrier protein-related OS=Schistosoma mansoni GN=Smp_106060 PE=3 SV=1	7	52.291	-0.0346913	17.9955	17.0438	18.8591	17.9661	18.9564	16.9574	18.0886	18.0008
G4VEP7	tr|G4VEP7|G4VEP7_SCHMA Putative 26s proteasome non-ATPase regulatory subunit OS=Schistosoma mansoni GN=Smp_181380 PE=4 SV=1	5	69.962	0.424279	17.8752	17.6058	17.5606	17.6806	17.5086	17.5635	16.6968	17.2563
G4VEP8;G4VEP9	tr|G4VEP8|G4VEP8_SCHMA Uncharacterized protein OS=Schistosoma mansoni GN=Smp_105970.1 PE=4 SV=1;tr|G4VEP9|G4VEP9_SCHMA Uncharacterized protein OS=Schistosoma mansoni GN=Smp_105970.2 PE=4 SV=1	9	57.256	0.0418591	21.3895	21.2687	21.1331	21.2637	21.1198	21.3873	21.1586	21.2219
G4VES1;G4VES2;G4VES3	tr|G4VES1|G4VES1_SCHMA Dihydropyrimidinase related protein-2 (M38 family) OS=Schistosoma mansoni GN=Smp_085110.2 PE=4 SV=1;tr|G4VES2|G4VES2_SCHMA Dihydropyrimidinase (M38 family) OS=Schistosoma mansoni GN=Smp_085110.3 PE=4 SV=1;tr|G4VES3|G4VES3_SCHMA Dihyd	26	63.859	-0.0537639	23.1526	23.2108	23.2404	23.2013	23.2777	23.1928	23.2945	23.255
G4VES6	tr|G4VES6|G4VES6_SCHMA Putative chaperone binding protein OS=Schistosoma mansoni GN=Smp_010160 PE=4 SV=1	9	23.03	0.161183	21.2199	21.3491	21.2785	21.2825	21.1949	21.332	20.837	21.1213
G4VET6	tr|G4VET6|G4VET6_SCHMA Snf7-related OS=Schistosoma mansoni GN=Smp_010090 PE=3 SV=1	1	19.528	-0.546721	18.7692	19.9539	19.8577	19.5269	19.9675	20.0378	20.2157	20.0736
G4VEW9	tr|G4VEW9|G4VEW9_SCHMA Putative shoc2 OS=Schistosoma mansoni GN=Smp_129120 PE=4 SV=1	4	60.12	-1.9014	16.5904	15.9635	16.065	16.2063	18.0734	17.6921	18.5576	18.1077
G4VEX2	tr|G4VEX2|G4VEX2_SCHMA Eukaryotic translation initiation factor 3 subunit J OS=Schistosoma mansoni GN=Smp_012980 PE=3 SV=1	8	25.709	-0.136113	21.2471	21.4886	21.5749	21.4369	21.2945	21.8408	21.5837	21.573
G4VEY4	tr|G4VEY4|G4VEY4_SCHMA Putative zinc binding dehydrogenase OS=Schistosoma mansoni GN=Smp_026310 PE=4 SV=1	13	39.407	-1.94488	20.8791	20.7048	21.1315	20.9051	22.9393	22.829	22.7818	22.85
G4VEZ3;G4VEZ2;G4VEZ1	tr|G4VEZ3|G4VEZ3_SCHMA Peptide alpha-n-acetyltransferase-related OS=Schistosoma mansoni GN=Smp_026250.1 PE=4 SV=1;tr|G4VEZ2|G4VEZ2_SCHMA Peptide alpha-n-acetyltransferase-related OS=Schistosoma mansoni GN=Smp_026250.2 PE=4 SV=1;tr|G4VEZ1|G4VEZ1_SCHMA Pepti	1	77.927	M only				N/A	15.3285	14.5375	14.8274	14.8978
G4VEZ6	tr|G4VEZ6|G4VEZ6_SCHMA Uncharacterized protein OS=Schistosoma mansoni GN=Smp_026230 PE=4 SV=1	3	16.676	-0.774445	21.9002	21.8027	21.1201	21.6077	22.2506	22.5658	22.3299	22.3821
G4VEZ9	tr|G4VEZ9|G4VEZ9_SCHMA Uncharacterized protein OS=Schistosoma mansoni GN=Smp_092810.1 PE=4 SV=1	2	31.277	0.720163	19.3012	19.2189	18.9505	19.1569	18.7594	17.7705	18.7803	18.4367
G4VF06;G4VF07	tr|G4VF06|G4VF06_SCHMA Putative receptor protein tyrosine phosphatase n,(Ia2) OS=Schistosoma mansoni GN=Smp_150220.1 PE=4 SV=1;tr|G4VF07|G4VF07_SCHMA Putative receptor protein tyrosine phosphatase n,(Ia2) OS=Schistosoma mansoni GN=Smp_150220.2 PE=4 SV=1	10	82.016	-0.14877	19.022	18.6722	18.1765	18.6235	18.7957	18.5858	18.9355	18.7723
G4VF17;G4VF19;G4VF18	tr|G4VF17|G4VF17_SCHMA Sporulation protein rmd5-related (Glucose-induced degradation protein 2) OS=Schistosoma mansoni GN=Smp_084400.4 PE=4 SV=1;tr|G4VF19|G4VF19_SCHMA Sporulation protein rmd5-related (Glucose-induced degradation protein 2) OS=Schistosoma	3	52.985	-0.512071	15.9712	16.709	15.9388	16.2063	16.0672	16.8735	17.2145	16.7184
G4VF21	tr|G4VF21|G4VF21_SCHMA Trans-golgi protein gmx33-related OS=Schistosoma mansoni GN=Smp_007500.1 PE=4 SV=1	2	32.081	0.411986	19.5968	19.2784	18.9321	19.2691	18.0894	19.2478	19.2342	18.8571
G4VF23;G4VF24;G4VF25	tr|G4VF23|G4VF23_SCHMA Ubiquitin carboxyl-terminal hydrolase OS=Schistosoma mansoni GN=Smp_168800.4 PE=3 SV=1;tr|G4VF24|G4VF24_SCHMA Ubiquitin carboxyl-terminal hydrolase OS=Schistosoma mansoni GN=Smp_168800.1 PE=3 SV=1;tr|G4VF25|G4VF25_SCHMA Ubiquitin car	2	17.8	0.50429	19.3164	19.4095	19.5244	19.4168	18.9626	19.0852	18.6896	18.9125
G4VF34	tr|G4VF34|G4VF34_SCHMA Abl-binding protein-related OS=Schistosoma mansoni GN=Smp_085740 PE=4 SV=1	2	61.306	-0.223245	19.1096	18.401	18.5873	18.6993	18.8038	18.8683	19.0955	18.9225
G4VF49	tr|G4VF49|G4VF49_SCHMA Lysosomal Pro-Xaa carboxypeptidase (S28 family) OS=Schistosoma mansoni GN=Smp_002600.1 PE=4 SV=1	3	56.326	0.502165	20.1221	20.4872	20.5418	20.3837	19.7417	19.8389	20.064	19.8815
G4VF52	tr|G4VF52|G4VF52_SCHMA Putative vacuolar protein sorting vps16 OS=Schistosoma mansoni GN=Smp_123510 PE=4 SV=1	3	105.34	0.277573	14.7407	14.8187	14.6406	14.7334	14.7836	14.4209	14.1628	14.4558
G4VF54;G4VF55	tr|G4VF54|G4VF54_SCHMA RNA-binding protein 8A OS=Schistosoma mansoni GN=Smp_002550.1 PE=3 SV=1;tr|G4VF55|G4VF55_SCHMA RNA-binding protein 8A OS=Schistosoma mansoni GN=Smp_002550.2 PE=3 SV=1	8	20.158	0.221764	21.3147	21.0551	20.6734	21.0144	20.6519	20.9	20.826	20.7927
G4VF56	tr|G4VF56|G4VF56_SCHMA Putative nicotinamide mononucleotide adenylyltransferase OS=Schistosoma mansoni GN=Smp_123490 PE=4 SV=1	7	32.845	0.609086	18.4487	19.1168	18.9182	18.8279	18.4227	18.2308	18.003	18.2188
G4VF59	tr|G4VF59|G4VF59_SCHMA Pyruvate dehydrogenase (Lipoamide) OS=Schistosoma mansoni GN=Smp_002510 PE=4 SV=1	10	38.71	-0.481969	23.1052	22.9263	23.2636	23.0984	23.4042	23.5722	23.7647	23.5803
G4VF64	tr|G4VF64|G4VF64_SCHMA Putative fad oxidoreductase OS=Schistosoma mansoni GN=Smp_123440.1 PE=4 SV=1	8	44.181	0.614828	19.9563	20.3462	20.0652	20.1225	19.413	19.6791	19.431	19.5077
G4VF73	tr|G4VF73|G4VF73_SCHMA Uncharacterized protein OS=Schistosoma mansoni GN=Smp_156370 PE=4 SV=1	1	78.908	-0.856815	15.8	15.7196	15.5251	15.6816	16.5846	16.4826	16.548	16.5384
G4VF74	tr|G4VF74|G4VF74_SCHMA Pyruvate kinase OS=Schistosoma mansoni GN=Smp_156360 PE=3 SV=1	6	127.12	-1.10006	15.3464	17.245	15.7207	16.104	17.0495	17.5798	16.9829	17.2041
G4VF75	tr|G4VF75|G4VF75_SCHMA Putative chaperonin containing t-complex protein 1,epsilon subunit, tcpe OS=Schistosoma mansoni GN=Smp_063420 PE=3 SV=1	18	60.244	-0.195831	23.1731	23.1296	23.2899	23.1975	23.4161	23.3635	23.4004	23.3933
G4VF83	tr|G4VF83|G4VF83_SCHMA Uncharacterized protein OS=Schistosoma mansoni GN=Smp_063330 PE=4 SV=1	1	21.177	2.63181	19.0861	19.7438	18.9223	19.2507	16.6189			16.6189
G4VF95	tr|G4VF95|G4VF95_SCHMA Putative leucine-rich repeat-containing protein OS=Schistosoma mansoni GN=Smp_063230 PE=4 SV=1	9	64.704	0.0944787	19.6168	19.4278	20.6395	19.8947	20.2588	19.8233	19.3186	19.8002
G4VFA5	tr|G4VFA5|G4VFA5_SCHMA Putative programmed cell death 6-interacting protein OS=Schistosoma mansoni GN=Smp_087620 PE=4 SV=1	25	93.194	0.0850699	21.5054	21.1633	20.7558	21.1415	21.1195	20.9875	21.0623	21.0564
G4VFA8	tr|G4VFA8|G4VFA8_SCHMA Pcd6 interacting protein-related OS=Schistosoma mansoni GN=Smp_087580 PE=4 SV=1	8	81.298	0.0672266	20.0557	19.9441	19.7549	19.9182	19.4631	19.8456	20.2442	19.851
G4VFB4	tr|G4VFB4|G4VFB4_SCHMA Uncharacterized protein OS=Schistosoma mansoni GN=Smp_079710 PE=4 SV=1	2	10.085	-0.328087	22.2426	21.6842	21.3398	21.7555	22.1438	22.3454	21.7616	22.0836
G4VFB9;G4VFC0	tr|G4VFB9|G4VFB9_SCHMA Protein kinase OS=Schistosoma mansoni GN=Smp_079760.1 PE=4 SV=1;tr|G4VFC0|G4VFC0_SCHMA Protein kinase OS=Schistosoma mansoni GN=Smp_079760.2 PE=4 SV=1	11	56.051	-0.227136	21.0778	21.8879	21.4083	21.458	21.467	22.2993	21.289	21.6851
G4VFC2;P38658;G4VFC1	tr|G4VFC2|G4VFC2_SCHMA Protein disulfide-isomerase OS=Schistosoma mansoni GN=Smp_079770.1 PE=3 SV=1;sp|P38658|ERP60_SCHMA Probable protein disulfide-isomerase ER-60 OS=Schistosoma mansoni PE=3 SV=1;tr|G4VFC1|G4VFC1_SCHMA Uncharacterized protein OS=Schistos	25	54.359	0.0537188	24.3816	24.7073	24.5779	24.5556	24.1648	24.6077	24.7332	24.5019
G4VFC7	tr|G4VFC7|G4VFC7_SCHMA Uroporphyrinogen-III synthase OS=Schistosoma mansoni GN=Smp_079840 PE=4 SV=1	7	27.361	-0.232641	21.281	21.4726	21.1909	21.3148	21.4275	21.7104	21.5045	21.5475
G4VFD1	tr|G4VFD1|G4VFD1_SCHMA UDP-glucose 6-dehydrogenase OS=Schistosoma mansoni GN=Smp_084830 PE=3 SV=1	2	54.324	1.31369	15.1365	16.5299	16.4662	16.0442	14.2946		15.1665	14.7305
G4VFE0	tr|G4VFE0|G4VFE0_SCHMA Putative collagen alpha-1(V) chain OS=Schistosoma mansoni GN=Smp_164590 PE=4 SV=1	5	151.98	0.710613	18.2202	19.3949	18.2615	18.6255	18.32	17.1512	18.2736	17.9149
G4VFE1	tr|G4VFE1|G4VFE1_SCHMA Uncharacterized protein OS=Schistosoma mansoni GN=Smp_197370 PE=4 SV=1	2	125.74	-0.104162	16.9107	17.2006	16.671	16.9274	17.4509	16.8397	16.8042	17.0316
G4VFE2	tr|G4VFE2|G4VFE2_SCHMA Groucho-related OS=Schistosoma mansoni GN=Smp_165280 PE=4 SV=1	2	94.905	-0.0935674	15.0665	14.8137	13.9096	14.5966	15.1341		14.2462	14.6902
G4VFE8;G4VCW3;G4VCW1;G4V9N3;G4V8L9	tr|G4VFE8|G4VFE8_SCHMA Histone H2A OS=Schistosoma mansoni GN=Smp_002930 PE=3 SV=1;tr|G4VCW3|G4VCW3_SCHMA Histone H2A OS=Schistosoma mansoni GN=Smp_089870 PE=3 SV=1;tr|G4VCW1|G4VCW1_SCHMA Histone H2A OS=Schistosoma mansoni GN=Smp_089840 PE=3 SV=1;tr|G4V9N3|	1	13.441	0.942493	20.6617	20.1455	21.0041	20.6038	19.314		20.0086	19.6613
G4VFF1;G4VFF2	tr|G4VFF1|G4VFF1_SCHMA Putative gtp-binding protein rit OS=Schistosoma mansoni GN=Smp_084940.1 PE=4 SV=1;tr|G4VFF2|G4VFF2_SCHMA Putative gtp-binding protein rit OS=Schistosoma mansoni GN=Smp_084940.3 PE=4 SV=1	4	18.09	-0.0985177	21.2335	20.9564	20.7637	20.9845	20.8809	21.1105	21.2578	21.083
G4VFF7	tr|G4VFF7|G4VFF7_SCHMA Putative translation initiation factor EIF-2b alpha subunit OS=Schistosoma mansoni GN=Smp_084900 PE=3 SV=1	2	37.007	-0.947786	16.3666	16.3258		16.3462	17.3559	16.9312	17.5949	17.294
G4VFG0	tr|G4VFG0|G4VFG0_SCHMA Uncharacterized protein OS=Schistosoma mansoni GN=Smp_084860 PE=4 SV=1	1	37.772	M only				N/A	16.4249	15.9219	16.5328	16.2932
G4VFG2	tr|G4VFG2|G4VFG2_SCHMA Uncharacterized protein OS=Schistosoma mansoni GN=Smp_168170 PE=4 SV=1	5	37.683	-0.165241	19.08	19.3753	19.6391	19.3648	19.434	19.4696	19.6865	19.53
G4VFG4	tr|G4VFG4|G4VFG4_SCHMA Uncharacterized protein OS=Schistosoma mansoni GN=Smp_138210 PE=3 SV=1	4	44.526	1.14979	18.9176	19.2817	18.6896	18.963	18.1011	18.5056	16.8328	17.8132
G4VFH9	tr|G4VFH9|G4VFH9_SCHMA Uncharacterized protein OS=Schistosoma mansoni GN=Smp_138290 PE=4 SV=1	1	62.756	1.77817	16.2619	15.4479	16.6305	16.1134	14.3353			14.3353
G4VFI2	tr|G4VFI2|G4VFI2_SCHMA Putative 4.1 G protein OS=Schistosoma mansoni GN=Smp_029800 PE=4 SV=1	3	54.147	0.625624	17.3146	16.1064	17.8182	17.0797	16.5275	16.4431	16.3917	16.4541
G4VFI4	tr|G4VFI4|G4VFI4_SCHMA Putative 60s acidic ribosomal protein P2 OS=Schistosoma mansoni GN=Smp_029820 PE=3 SV=1	7	12.067	-0.50473	21.7328	22.8935	22.3165	22.3143	22.7912	22.9538	22.7121	22.819
G4VFI8	tr|G4VFI8|G4VFI8_SCHMA Putative septin OS=Schistosoma mansoni GN=Smp_029890 PE=1 SV=1	8	48.077	-0.14219	20.3251	20.4129	19.9957	20.2446	20.3121	20.4174	20.4308	20.3868
G4VFJ4	tr|G4VFJ4|G4VFJ4_SCHMA Uncharacterized protein OS=Schistosoma mansoni GN=Smp_138360 PE=4 SV=1	1	8.5674	F only	19.5556	20.1221	19.7211	19.7996				N/A
G4VFL2	tr|G4VFL2|G4VFL2_SCHMA Uncharacterized protein OS=Schistosoma mansoni GN=Smp_138400 PE=4 SV=1	2	337.98	0.190334	17.0054	16.9792	15.9221	16.6356	16.2228	16.4361	16.6769	16.4453
G4VFM3	tr|G4VFM3|G4VFM3_SCHMA Putative homer OS=Schistosoma mansoni GN=Smp_030150 PE=4 SV=1	4	42.828	0.570859	19.5394	19.0659	19.1679	19.2577	18.3445	18.9173	18.7988	18.6869
G4VFM6	tr|G4VFM6|G4VFM6_SCHMA Ubiquitin-related modifier 1 homolog OS=Schistosoma mansoni GN=Smp_030180 PE=3 SV=1	2	10.858	0.19878	18.7647	18.0377	18.2003	18.3343	18.9519	18.8394	16.6151	18.1355
G4VFM9	tr|G4VFM9|G4VFM9_SCHMA Putative phosphoglycolate/pyridoxal phosphate phosphatase OS=Schistosoma mansoni GN=Smp_030220 PE=3 SV=1	5	31.914	0.195994	21.9555	21.7331	21.1433	21.6106	21.6379	21.5825	21.0235	21.4146
G4VFN5	tr|G4VFN5|G4VFN5_SCHMA Putative prefoldin subunit 2 OS=Schistosoma mansoni GN=Smp_030290 PE=4 SV=1	6	16.261	0.537903	21.0438	20.8568	21.0376	20.9794	20.1351	20.6285	20.5609	20.4415
G4VFN7;G4VFN9;Q9NHY5	tr|G4VFN7|G4VFN7_SCHMA Putative endoplasmin OS=Schistosoma mansoni GN=Smp_030300.4 PE=3 SV=1;tr|G4VFN9|G4VFN9_SCHMA Putative endoplasmin OS=Schistosoma mansoni GN=Smp_030300.3 PE=3 SV=1;tr|Q9NHY5|Q9NHY5_SCHMA Endoplasmin OS=Schistosoma mansoni PE=2 SV=1	49	239.52	-0.485138	22.9484	23.0116	22.4082	22.7894	23.2543	23.1783	23.391	23.2745
G4VFP3;G4VFP2	tr|G4VFP3|G4VFP3_SCHMA Putative peptidyl-tRNA hydrolase OS=Schistosoma mansoni GN=Smp_030330.1 PE=4 SV=1;tr|G4VFP2|G4VFP2_SCHMA Putative peptidyl-tRNA hydrolase OS=Schistosoma mansoni GN=Smp_030330.2 PE=4 SV=1	4	17.092	-1.24072	18.3661	20.2482	19.1973	19.2705	20.3565	20.4091	20.7681	20.5113
G4VFP9	tr|G4VFP9|G4VFP9_SCHMA Putative glycyl-tRNA synthetase OS=Schistosoma mansoni GN=Smp_040800 PE=4 SV=1	35	148.86	-1.11808	20.835	21.0553	20.2514	20.7139	21.8136	21.7862	21.8962	21.832
G4VFQ0;Q26551	tr|G4VFQ0|G4VFQ0_SCHMA Peptidyl-prolyl cis-trans isomerase OS=Schistosoma mansoni GN=Smp_040790 PE=3 SV=1;sp|Q26551|PPIB_SCHMA Peptidyl-prolyl cis-trans isomerase B OS=Schistosoma mansoni GN=CYP PE=2 SV=1	11	23.296	-0.373847	22.7073	23.0108	22.5364	22.7515	23.2988	22.8905	23.1867	23.1253
G4VFQ2	tr|G4VFQ2|G4VFQ2_SCHMA Putative methionine-tRNA synthetase OS=Schistosoma mansoni GN=Smp_040770 PE=3 SV=1	13	67.687	-0.746983	19.7109	18.6596	19.46	19.2768	20.4809	19.3574	20.2332	20.0238
G4VFS5	tr|G4VFS5|G4VFS5_SCHMA Putative nucleosome assembly protein OS=Schistosoma mansoni GN=Smp_023530 PE=3 SV=1	7	44.667	-0.301339	20.9516	21.5667	21.2244	21.2476	21.526	21.4418	21.679	21.5489
G4VFT3	tr|G4VFT3|G4VFT3_SCHMA Putative 4.1 G protein OS=Schistosoma mansoni GN=Smp_023620 PE=4 SV=1	6	76.634	0.0386331	18.3347	17.3331	18.4916	18.0531	18.0637	18.2643	17.7155	18.0145
G4VFV4	tr|G4VFV4|G4VFV4_SCHMA Putative rap1 and OS=Schistosoma mansoni GN=Smp_071250 PE=4 SV=1	8	20.699	-0.180194	24.0398	23.9649	23.4456	23.8168	23.9898	23.9754	24.0256	23.997
G4VFV7	tr|G4VFV7|G4VFV7_SCHMA Putative tpr OS=Schistosoma mansoni GN=Smp_160850 PE=4 SV=1	5	270.7	-0.257957	15.3732	14.8895	14.2401	14.8343	15.6557	14.8077	14.8133	15.0922
G4VFX0;Q15ER8	tr|G4VFX0|G4VFX0_SCHMA Putative tropinone reductase OS=Schistosoma mansoni GN=Smp_042680 PE=4 SV=1;tr|Q15ER8|Q15ER8_SCHMA U2 snRNP splicing factor small subunit-like protein OS=Schistosoma mansoni PE=2 SV=1	8	29.407	0.612126	22.685	22.433	22.5753	22.5644	22.0028	22.1013	21.7528	21.9523
G4VFX6;G4VFX7	tr|G4VFX6|G4VFX6_SCHMA Putative histidyl-tRNA synthetase OS=Schistosoma mansoni GN=Smp_023360.2 PE=4 SV=1;tr|G4VFX7|G4VFX7_SCHMA Putative histidyl-tRNA synthetase OS=Schistosoma mansoni GN=Smp_023360.1 PE=4 SV=1	14	59.929	-1.0108	18.9006	19.5138	19.4674	19.2939	20.3217	20.3316	20.261	20.3047
G4VFY6	tr|G4VFY6|G4VFY6_SCHMA Calcium-transporting ATPase OS=Schistosoma mansoni GN=Smp_136710.2 PE=3 SV=1	2	107.15	-0.823476	18.9284	18.6472	18.6834	18.753	19.4753	18.8257	20.4284	19.5765
G4VFY8;G4VFY9	tr|G4VFY8|G4VFY8_SCHMA Lipase maturation factor OS=Schistosoma mansoni GN=Smp_026910.1 PE=3 SV=1;tr|G4VFY9|G4VFY9_SCHMA Lipase maturation factor OS=Schistosoma mansoni GN=Smp_026910.2 PE=3 SV=1	8	73.83	0.295712	20.0119	19.8913	20.4279	20.1104	19.9798	19.3325	20.1317	19.8147
G4VG02	tr|G4VG02|G4VG02_SCHMA Phosphatidylinositol transfer protein OS=Schistosoma mansoni GN=Smp_197450 PE=4 SV=1	7	108.7	1.41938	17.7123	17.1175	17.3402	17.39	15.8439	15.3249	16.743	15.9706
G4VG30;B1NYH8	tr|G4VG30|G4VG30_SCHMA Venom allergen-like (VAL) 8 protein OS=Schistosoma mansoni GN=Smp_123550 PE=3 SV=1;tr|B1NYH8|B1NYH8_SCHMA Venom allergen-like protein 8 (Fragment) OS=Schistosoma mansoni PE=2 SV=1	2	29.86	1.722	19.5201	19.7527	20.5669	19.9466		17.8218	18.6273	18.2246
G4VG38	tr|G4VG38|G4VG38_SCHMA Putative 60s ribosomal protein L9 OS=Schistosoma mansoni GN=Smp_018990 PE=4 SV=1	5	20.679	0.416466	21.5298	19.9767	21.6593	21.0553	20.8037	20.4878	20.6249	20.6388
G4VG40	tr|G4VG40|G4VG40_SCHMA Dipeptidyl peptidase 3 OS=Schistosoma mansoni GN=Smp_019010 PE=3 SV=1	27	81.887	-0.131524	23.1762	23.0761	22.9664	23.0729	23.319	23.1272	23.1672	23.2045
G4VG41	tr|G4VG41|G4VG41_SCHMA Putative choline/ethanolamine kinase OS=Schistosoma mansoni GN=Smp_132570 PE=4 SV=1	4	34.094	0.150331	18.2649	18.2447	17.5024	18.004	17.9905	17.9656	17.6049	17.8537
G4VG42;Q26563	tr|G4VG42|G4VG42_SCHMA Putative cathepsin C OS=Schistosoma mansoni GN=Smp_019030 PE=3 SV=1;sp|Q26563|CATC_SCHMA Cathepsin C OS=Schistosoma mansoni PE=2 SV=1	5	51.828	0.460415	18.9719	19.0584	19.2279	19.0861	19.107	18.2887	18.4812	18.6256
G4VG45;G4VG46	tr|G4VG45|G4VG45_SCHMA Tubulin-specific chaperone A OS=Schistosoma mansoni GN=Smp_019050.1 PE=3 SV=1;tr|G4VG46|G4VG46_SCHMA Tubulin-specific chaperone A OS=Schistosoma mansoni GN=Smp_019050.2 PE=3 SV=1	3	12.649	-0.192115	21.0174	20.79	20.4787	20.762	20.7375	21.311	20.8139	20.9541
G4VG47	tr|G4VG47|G4VG47_SCHMA Protein transport protein Sec61 subunit beta OS=Schistosoma mansoni GN=Smp_019060 PE=3 SV=1	1	9.2256	-0.575231		18.3964	17.8545	18.1255	19.0497	18.6912	18.3611	18.7007
G4VG55	tr|G4VG55|G4VG55_SCHMA Coatomer subunit epsilon OS=Schistosoma mansoni GN=Smp_169690 PE=3 SV=1	5	33.274	-0.000730058	19.9548	19.0883	20.6366	19.8933	19.9871	19.5706	20.1243	19.894
G4VG71	tr|G4VG71|G4VG71_SCHMA Putative gynecophoral canal protein OS=Schistosoma mansoni GN=Smp_177050 PE=4 SV=1	21	93.636	0.44712	24.0585	24.0434	23.5276	23.8765	23.4743	23.2499	23.564	23.4294
G4VG96	tr|G4VG96|G4VG96_SCHMA Cell polarity protein OS=Schistosoma mansoni GN=Smp_130280 PE=4 SV=1	46	279.49	0.721187	21.0278	20.9749	21.2602	21.0876	20.5303	20.1512	20.4179	20.3665
G4VGA3	tr|G4VGA3|G4VGA3_SCHMA Prolyl oligopeptidase (S09 family) OS=Schistosoma mansoni GN=Smp_210740 PE=3 SV=1	9	62.997	-0.359647	20.8884	20.8454	21.2681	21.0006	21.2164	21.4825	21.3819	21.3603
G4VGA5	tr|G4VGA5|G4VGA5_SCHMA Sodium/potassium-transporting ATPase subunit alpha OS=Schistosoma mansoni GN=Smp_015020 PE=3 SV=1	14	113.48	2.1097	20.3941	20.3742	20.1923	20.3202	18.1837	18.1548	18.293	18.2105
G4VGA7	tr|G4VGA7|G4VGA7_SCHMA Choline kinase OS=Schistosoma mansoni GN=Smp_015050 PE=4 SV=1	1	47.747	M only				N/A	16.0194	16.8264	16.2434	16.363
G4VGA9;G4VGB0	tr|G4VGA9|G4VGA9_SCHMA Putative vacuolar ATP synthase subunit h OS=Schistosoma mansoni GN=Smp_015070.1 PE=4 SV=1;tr|G4VGB0|G4VGB0_SCHMA Putative vacuolar ATP synthase subunit h OS=Schistosoma mansoni GN=Smp_015070.2 PE=4 SV=1	7	28.274	0.357065	20.9963	20.9052	21.3496	21.0837	20.6808	20.734	20.7651	20.7266
G4VGB1	tr|G4VGB1|G4VGB1_SCHMA Putative vacuolar ATP synthase subunit h OS=Schistosoma mansoni GN=Smp_117810 PE=4 SV=1	2	12.625	0.0135149	20.1718	20.3971	20.6068	20.3919	20.3144	20.1236	20.6972	20.3784
G4VGB4	tr|G4VGB4|G4VGB4_SCHMA Coatomer subunit beta OS=Schistosoma mansoni GN=Smp_015090 PE=3 SV=1	18	108.8	0.529623	20.1074	20.3092	19.7996	20.0721	19.3281	19.4422	19.857	19.5424
G4VGD5	tr|G4VGD5|G4VGD5_SCHMA Family S33 non-peptidase homologue (S33 family) OS=Schistosoma mansoni GN=Smp_194720 PE=4 SV=1	4	39.819	0.316707	20.2452	20.2251	19.9562	20.1422	19.9155	19.5264	20.0345	19.8255
G4VGE0	tr|G4VGE0|G4VGE0_SCHMA Putative replication factor A 1, rfa1 OS=Schistosoma mansoni GN=Smp_121800 PE=4 SV=1	2	61.872	0.725171	17.3557	16.6558	16.8834	16.965			16.2398	16.2398
G4VGE6	tr|G4VGE6|G4VGE6_SCHMA Uncharacterized protein OS=Schistosoma mansoni GN=Smp_194650 PE=4 SV=1	4	158.36	-1.39481		15.169	13.8911	14.5301	15.8625	15.3745	16.5375	15.9249
G4VGE8	tr|G4VGE8|G4VGE8_SCHMA Putative 26s proteasome non-ATPase regulatory subunit OS=Schistosoma mansoni GN=Smp_052870 PE=4 SV=1	14	45.086	0.236512	21.9106	22.0148	21.8355	21.9203	21.5487	21.7076	21.7951	21.6838
G4VGF4	tr|G4VGF4|G4VGF4_SCHMA Skp1-related OS=Schistosoma mansoni GN=Smp_052910 PE=3 SV=1	4	18.702	-0.725622	20.1514	20.0418	20.2697	20.1543	20.7646	21.0704	20.8048	20.88
G4VGG1;G4VGG0	tr|G4VGG1|G4VGG1_SCHMA Putative proteasome inhibitor OS=Schistosoma mansoni GN=Smp_066340.1 PE=4 SV=1;tr|G4VGG0|G4VGG0_SCHMA Putative proteasome inhibitor OS=Schistosoma mansoni GN=Smp_066340.2 PE=4 SV=1	5	34.259	0.203518	18.8789	19.1817	18.7554	18.9387	18.3586	19.406	18.4409	18.7352
G4VGG5	tr|G4VGG5|G4VGG5_SCHMA Uncharacterized protein OS=Schistosoma mansoni GN=Smp_157980 PE=4 SV=1	3	142.06	1.06063		15.3955	16.2772	15.8364	15.3397	13.1171	15.8703	14.7757
G4VGH2	tr|G4VGH2|G4VGH2_SCHMA Uncharacterized protein OS=Schistosoma mansoni GN=Smp_099800 PE=4 SV=1	28	246.1	0.0856015	19.6765	18.7466	20.2426	19.5552	19.8342	18.9197	19.655	19.4696
G4VGH3	tr|G4VGH3|G4VGH3_SCHMA Uncharacterized protein OS=Schistosoma mansoni GN=Smp_099810 PE=4 SV=1	5	27.989	0.19294	20.4508	18.703	20.7864	19.9801	20.2113	19.3406	19.8095	19.7871
G4VGH9	tr|G4VGH9|G4VGH9_SCHMA Putative uridine phosphorylase OS=Schistosoma mansoni GN=Smp_082420 PE=1 SV=1	10	32.7	0.935686	20.5971	20.7417	20.6766	20.6718	19.6571	19.8634	19.6879	19.7361
G4VGJ9	tr|G4VGJ9|G4VGJ9_SCHMA Putative alpha adaptin carboxyl-terminal domain OS=Schistosoma mansoni GN=Smp_074020 PE=4 SV=1	23	106.71	-0.0373073	20.3562	19.9104	20.0935	20.12	20.3131	19.681	20.4779	20.1573
G4VGL2	tr|G4VGL2|G4VGL2_SCHMA Isocitrate dehydrogenase [NAD] subunit, mitochondrial OS=Schistosoma mansoni GN=Smp_018680 PE=3 SV=1	9	41.344	-0.810984	22.1439	22.1618	21.9417	22.0825	22.7586	22.9697	22.9521	22.8935
G4VGL9	tr|G4VGL9|G4VGL9_SCHMA Paraplegin (M41 family) OS=Schistosoma mansoni GN=Smp_018620 PE=3 SV=1	5	69.883	0.128835	17.9786	16.7988	17.0711	17.2828	18.3357	16.5078	16.6184	17.154
G4VGM5	tr|G4VGM5|G4VGM5_SCHMA Putative rab15, 13, 10, 1, 35, 5, and OS=Schistosoma mansoni GN=Smp_132330 PE=4 SV=1	3	24.238	0.528982	16.9192	18.4865	17.6796	17.6951	16.4518	17.1327	17.9138	17.1661
G4VGM7	tr|G4VGM7|G4VGM7_SCHMA Putative cadherin OS=Schistosoma mansoni GN=Smp_132320 PE=4 SV=1	4	152.3	-0.0529781	19.2471	19.3859	17.8608	18.8313	18.739	18.7744	19.1394	18.8842
G4VGM8;G4VGM9	tr|G4VGM8|G4VGM8_SCHMA Putative nascent polypeptide associated complex alpha subunit (Nac alpha) OS=Schistosoma mansoni GN=Smp_018530.1 PE=4 SV=1;tr|G4VGM9|G4VGM9_SCHMA Putative nascent polypeptide associated complex alpha subunit (Nac alpha) OS=Schistosom	6	22.456	0.137315	21.4349	21.6185	21.3094	21.4543	21.4922	21.4069	21.0518	21.317
G4VGN0	tr|G4VGN0|G4VGN0_SCHMA Kinesin-like protein OS=Schistosoma mansoni GN=Smp_132300 PE=3 SV=1	2	86.083	-1.09461	17.2261	14.7796	15.7633	15.923	17.124	17.0124	16.9164	17.0176
G4VGQ5	tr|G4VGQ5|G4VGQ5_SCHMA Glycogen [starch] synthase OS=Schistosoma mansoni GN=Smp_018260 PE=3 SV=1	24	80.688	-1.04423	21.3719	21.181	21.2909	21.2813	22.3421	22.2012	22.4332	22.3255
G4VGQ7;G4VGQ6	tr|G4VGQ7|G4VGQ7_SCHMA Putative troponin I OS=Schistosoma mansoni GN=Smp_018250.1 PE=4 SV=1;tr|G4VGQ6|G4VGQ6_SCHMA Putative troponin I OS=Schistosoma mansoni GN=Smp_018250.2 PE=4 SV=1	9	26.274	-0.422524	26.9579	26.8107	26.6878	26.8188	27.0534	27.3725	27.2982	27.2414
G4VGR1	tr|G4VGR1|G4VGR1_SCHMA Putative 30s ribosomal protein S8 OS=Schistosoma mansoni GN=Smp_076740 PE=3 SV=1	2	14.976	-0.158707	20.9296	19.6585	20.0557	20.2146	20.8576	20.2264	20.036	20.3733
G4VGS4;G4VGS3;G4VGS2	tr|G4VGS4|G4VGS4_SCHMA Serine/threonine-protein phosphatase OS=Schistosoma mansoni GN=Smp_028990.1 PE=3 SV=1;tr|G4VGS3|G4VGS3_SCHMA Serine/threonine-protein phosphatase OS=Schistosoma mansoni GN=Smp_028990.3 PE=3 SV=1;tr|G4VGS2|G4VGS2_SCHMA Serine/threonin	5	37.408	0.606651	19.5303	19.5661	19.468	19.5215	19.0354	18.6775	19.0315	18.9148
G4VGT4	tr|G4VGT4|G4VGT4_SCHMA Ubiquinone biosynthesis O-methyltransferase, mitochondrial OS=Schistosoma mansoni GN=Smp_029060 PE=3 SV=1	1	32.405	-0.982756	17.5407	17.5372	18.1489	17.7423	18.8908	18.5607	18.7236	18.725
G4VGT9;G4VGU0	tr|G4VGT9|G4VGT9_SCHMA Uncharacterized protein OS=Schistosoma mansoni GN=Smp_029100.1 PE=4 SV=1;tr|G4VGU0|G4VGU0_SCHMA Uncharacterized protein OS=Schistosoma mansoni GN=Smp_029100.2 PE=4 SV=1	3	13.912	-0.712136	17.0906	19.7668	19.3714	18.743	20.3592	18.9999	19.0061	19.4551
G4VGU2	tr|G4VGU2|G4VGU2_SCHMA Putative chloride intracellular channel OS=Schistosoma mansoni GN=Smp_137920 PE=4 SV=1	7	29.75	0.0895796	21.6481	21.6945	21.7853	21.7093	21.5613	21.6534	21.6445	21.6197
G4VGU4	tr|G4VGU4|G4VGU4_SCHMA Putative guanylate kinase OS=Schistosoma mansoni GN=Smp_137940 PE=4 SV=1	6	20.472	-0.290331	20.1418	20.3246	20.0579	20.1748	20.6703	20.764	19.9609	20.4651
G4VGV3	tr|G4VGV3|G4VGV3_SCHMA Uncharacterized protein OS=Schistosoma mansoni GN=Smp_029230 PE=4 SV=1	2	10.599	-0.256891		16.9479	18.0741	17.511	17.1847	17.9495	18.1695	17.7679
G4VGW5	tr|G4VGW5|G4VGW5_SCHMA Uncharacterized protein OS=Schistosoma mansoni GN=Smp_177190 PE=4 SV=1	4	37.134	-2.3264	14.8874	16.8691		15.8782	17.541	18.1775	18.8954	18.2046
G4VGX1	tr|G4VGX1|G4VGX1_SCHMA Putative actin-depolymerizing factor OS=Schistosoma mansoni GN=Smp_086590 PE=3 SV=1	7	16.41	-0.84637	20.1787	21.7846	21.9936	21.319	22.2485	22.4576	21.7898	22.1653
G4VGX9	tr|G4VGX9|G4VGX9_SCHMA Putative syntaxin binding protein-1,2,3 OS=Schistosoma mansoni GN=Smp_131870 PE=3 SV=1	20	66.586	0.525851	20.7289	20.2848	21.1097	20.7078	20.3488	19.9488	20.2482	20.1819
G4VGY6	tr|G4VGY6|G4VGY6_SCHMA Putative atp synthase subunit d OS=Schistosoma mansoni GN=Smp_103200 PE=3 SV=1	3	28.238	0.129233	17.1688	14.6217	17.8233	16.538	17.4674	16.8295	14.9293	16.4087
G4VH00	tr|G4VH00|G4VH00_SCHMA Putative pur-alpha OS=Schistosoma mansoni GN=Smp_075120 PE=4 SV=1	2	33.754	0.290601	16.4469	15.7656	19.3078	17.1735	16.8829			16.8829
G4VH12	tr|G4VH12|G4VH12_SCHMA Putative ubiquitin-activating enzyme e1 OS=Schistosoma mansoni GN=Smp_162630.1 PE=4 SV=1	27	102.42	-0.494125	21.6543	21.7466	20.7698	21.3902	22.1423	21.6707	21.8401	21.8844
G4VH20	tr|G4VH20|G4VH20_SCHMA Uncharacterized protein OS=Schistosoma mansoni GN=Smp_074870 PE=4 SV=1	9	29.818	-0.471912	20.5573	21.246	21.1564	20.9866	21.4395	21.5051	21.4308	21.4585
G4VH28	tr|G4VH28|G4VH28_SCHMA Putative 40s ribosomal protein S18 OS=Schistosoma mansoni GN=Smp_074780 PE=3 SV=1	4	17.769	-0.163879	21.9865	21.7611	21.6847	21.8108	22.0622	21.8733	21.9885	21.9747
G4VH48	tr|G4VH48|G4VH48_SCHMA Secretory carrier-associated membrane protein OS=Schistosoma mansoni GN=Smp_013460 PE=3 SV=1	3	36.975	1.90489	19.5567	19.6053	20.0351	19.7324	17.8484	17.7047	17.9294	17.8275
G4VH63;G4VH64	tr|G4VH63|G4VH63_SCHMA Putative surface protein PspC OS=Schistosoma mansoni GN=Smp_055220.3 PE=4 SV=1;tr|G4VH64|G4VH64_SCHMA Putative surface protein PspC OS=Schistosoma mansoni GN=Smp_055220.2 PE=4 SV=1	3	82.073	0.463927	17.0289	16.8362	14.5732	16.1461		15.6822		15.6822
G4VH65	tr|G4VH65|G4VH65_SCHMA Microsomal GST-3 OS=Schistosoma mansoni GN=Smp_055210 PE=4 SV=1	6	17.961	-0.642988	24.077	23.3987	23.9785	23.8181	24.6701	24.2022	24.511	24.4611
G4VH66	tr|G4VH66|G4VH66_SCHMA Dolichyl-diphosphooligosaccharide-proteinglycos yl transferase-related OS=Schistosoma mansoni GN=Smp_055200 PE=4 SV=1	3	37.97	0.746837	18.171	19.6097	19.5492	19.1099	18.1967	17.6568	19.2358	18.3631
G4VH74	tr|G4VH74|G4VH74_SCHMA Putative nebulin OS=Schistosoma mansoni GN=Smp_151490 PE=4 SV=1	4	28.108	-3.93223	16.6204	15.9912		16.3058	20.0891	20.3684	20.2565	20.238
G4VH80	tr|G4VH80|G4VH80_SCHMA Putative 40s ribosomal protein S17 OS=Schistosoma mansoni GN=Smp_055050 PE=3 SV=1	2	14.02	0.00803051	21.6465	20.4859	20.7398	20.9574	21.2744	20.6896	20.8842	20.9494
G4VH87;G4VH86;G4VH88	tr|G4VH87|G4VH87_SCHMA Restin-like OS=Schistosoma mansoni GN=Smp_149200.3 PE=4 SV=1;tr|G4VH86|G4VH86_SCHMA Restin-like OS=Schistosoma mansoni GN=Smp_149200.2 PE=4 SV=1;tr|G4VH88|G4VH88_SCHMA Restin-like OS=Schistosoma mansoni GN=Smp_149200.1 PE=4 SV=1	26	156.18	-0.959138	19.0463	18.982	18.1379	18.7221	19.6996	19.5985	19.7455	19.6812
G4VH95	tr|G4VH95|G4VH95_SCHMA Putative acyl-CoA-binding protein (Acbp) (Diazepam binding inhibitor) (Dbi) (Endozepine) OS=Schistosoma mansoni GN=Smp_149150 PE=4 SV=1	2	38.151	-0.695171	20.417	20.374	19.6926	20.1612	20.8676	21.1451	20.5564	20.8564
G4VH98	tr|G4VH98|G4VH98_SCHMA Putative fimbrin/plastin OS=Schistosoma mansoni GN=Smp_149130 PE=4 SV=1	2	101.51	-0.974849	15.832	18.9953	18.5283	17.7852	17.3594	19.2589	19.6618	18.76
G4VHA9	tr|G4VHA9|G4VHA9_SCHMA Putative nedd8-conjugating enzyme nce2 OS=Schistosoma mansoni GN=Smp_027370 PE=3 SV=1	4	21.213	-1.59247	19.0668	19.2585	18.5416	18.9556	20.8027	20.8541	19.9875	20.5481
G4VHB0	tr|G4VHB0|G4VHB0_SCHMA Uncharacterized protein OS=Schistosoma mansoni GN=Smp_027360 PE=4 SV=1	2	10.31	-0.722543	19.873	20.2775	19.2745	19.8083	20.9368	20.8547	19.8011	20.5309
G4VHB1	tr|G4VHB1|G4VHB1_SCHMA Putative dynactin subunit 3 (Dynactin light chain p24) OS=Schistosoma mansoni GN=Smp_136990 PE=4 SV=1	1	16.097	-0.40263	19.3482	20.2223	19.8978	19.8228	20.2357	20.264	20.1765	20.2254
G4VHB5	tr|G4VHB5|G4VHB5_SCHMA Putative sideroflexin 1,2,3 OS=Schistosoma mansoni GN=Smp_136960 PE=4 SV=1	6	164.53	0.878344	18.3875	16.206	18.747	17.7802	17.739	15.1486	17.8179	16.9018
G4VHC0	tr|G4VHC0|G4VHC0_SCHMA PRX_like2 domain-containing protein OS=Schistosoma mansoni GN=Smp_194940 PE=4 SV=1	1	22.665	-0.126021	16.291	16.374	16.7246	16.4632		16.9151	16.2634	16.5892
G4VHC1	tr|G4VHC1|G4VHC1_SCHMA Uncharacterized protein OS=Schistosoma mansoni GN=Smp_136930 PE=3 SV=1	4	48.066	-1.19584	17.7934	18.5384	18.0024	18.1114	19.1877	19.7053	19.0287	19.3072
G4VHD9	tr|G4VHD9|G4VHD9_SCHMA T-complex protein 1 subunit delta OS=Schistosoma mansoni GN=Smp_004600 PE=3 SV=1	24	58.047	0.130485	23.569	23.2433	23.69	23.5008	23.5807	23.1734	23.3567	23.3703
G4VHF4	tr|G4VHF4|G4VHF4_SCHMA Putative camp-dependent protein kinase type II regulatory subunit OS=Schistosoma mansoni GN=Smp_131050 PE=4 SV=1	4	33.82	0.158266	19.3604	19.5237	19.1137	19.3326	19.4608	19.379	18.6832	19.1743
G4VHG0	tr|G4VHG0|G4VHG0_SCHMA Uncharacterized protein OS=Schistosoma mansoni GN=Smp_131080 PE=4 SV=1	3	27.353	-0.801859	17.7033	19.1438	18.0262	18.2911	18.2768	19.5894	19.4126	19.093
G4VHG1	tr|G4VHG1|G4VHG1_SCHMA Putative ran-binding protein OS=Schistosoma mansoni GN=Smp_016410 PE=4 SV=1	10	225.79	-0.0393906	17.4784	16.8548	17.2261	17.1865	17.2611	17.3618	17.0547	17.2259
G4VHH1	tr|G4VHH1|G4VHH1_SCHMA Uncharacterized protein OS=Schistosoma mansoni GN=Smp_194910 PE=4 SV=1	3	21.036	4.01085	23.8397	23.5878	24.3453	23.9243	22.1441	21.4634	16.1328	19.9134
G4VHH2	tr|G4VHH2|G4VHH2_SCHMA Uncharacterized protein Smp_202610 OS=Schistosoma mansoni GN=Smp_202610 PE=4 SV=1	1	15.599	1.93475	21.1204	20.614	21.6143	21.1162	19.3644		18.9986	19.1815
G4VHH3;G4VHH4	tr|G4VHH3|G4VHH3_SCHMA Uncharacterized protein OS=Schistosoma mansoni GN=Smp_016490.1 PE=4 SV=1;tr|G4VHH4|G4VHH4_SCHMA Uncharacterized protein OS=Schistosoma mansoni GN=Smp_016490.2 PE=4 SV=1	1	22.413	1.77666	19.5708	19.1764	19.5862	19.4445	17.9403	17.4454	17.6178	17.6678
G4VHJ2	tr|G4VHJ2|G4VHJ2_SCHMA Putative rab-2,4,14 OS=Schistosoma mansoni GN=Smp_055670 PE=4 SV=1	2	25.117	0.482838	18.4379	17.5406	18.3119	18.0968	17.2467	18.2838	17.3114	17.614
G4VHK2	tr|G4VHK2|G4VHK2_SCHMA Family M41 unassigned peptidase (M41 family) OS=Schistosoma mansoni GN=Smp_055760.1 PE=3 SV=1	1	61.428	M only				N/A	14.5187	14.6015	15.048	14.7227
G4VHK5;Q26599	tr|G4VHK5|G4VHK5_SCHMA Smdr2 OS=Schistosoma mansoni GN=Smp_055780 PE=4 SV=1;tr|Q26599|Q26599_SCHMA SMDR2 OS=Schistosoma mansoni GN=ATP-cassette family protein PE=4 SV=1	6	106.58	0.694399	17.0584	16.4632	17.2733	16.9316	16.856		15.6185	16.2372
G4VHK8;C4QIC0;G4VTA4	tr|G4VHK8|G4VHK8_SCHMA Tubulin beta chain OS=Schistosoma mansoni GN=Smp_192110 PE=3 SV=1;tr|C4QIC0|C4QIC0_SCHMA Tubulin beta chain OS=Schistosoma mansoni GN=Smp_078040 PE=3 SV=1;tr|G4VTA4|G4VTA4_SCHMA Tubulin beta chain OS=Schistosoma mansoni GN=Smp_079960	33	49.816	-0.479272	26.7671	26.527	27.0426	26.7789	27.269	27.2611	27.2445	27.2582
G4VHL2	tr|G4VHL2|G4VHL2_SCHMA Gamma-glutamyltransferase-like protein 3 (T03 family) OS=Schistosoma mansoni GN=Smp_089100 PE=4 SV=1	8	58.591	0.330537	19.4815	19.641	19.7859	19.6361	19.2829	19.3247	19.3093	19.3056
G4VHL4	tr|G4VHL4|G4VHL4_SCHMA Proteasome endopeptidase complex OS=Schistosoma mansoni GN=Smp_170730 PE=3 SV=1	11	72.443	-0.435314	20.756	21.1653	20.5208	20.8141	20.8576	21.6767	21.2138	21.2494
G4VHL5;G4VHL7;G4VHL6	tr|G4VHL5|G4VHL5_SCHMA Putative eukaryotic translation initiation factor 4h OS=Schistosoma mansoni GN=Smp_089060.2 PE=4 SV=1;tr|G4VHL7|G4VHL7_SCHMA Putative eukaryotic translation initiation factor 4h OS=Schistosoma mansoni GN=Smp_089060.3 PE=4 SV=1;tr|G4V	2	24.903	0.499912	18.0667	18.5699	18.5132	18.3832	17.0633	18.3287	18.258	17.8833
G4VHM5;G4VHM6	tr|G4VHM5|G4VHM5_SCHMA Putative translocon-associated protein, delta subunit OS=Schistosoma mansoni GN=Smp_089000.1 PE=4 SV=1;tr|G4VHM6|G4VHM6_SCHMA Putative translocon-associated protein, delta subunit OS=Schistosoma mansoni GN=Smp_089000.2 PE=4 SV=1	1	14.561	-0.27796	18.2491	18.6782	17.7865	18.2379	18.5504	18.2255	18.7718	18.5159
G4VHN0	tr|G4VHN0|G4VHN0_SCHMA Uncharacterized protein OS=Schistosoma mansoni GN=Smp_170630 PE=4 SV=1	24	60.113	0.56321	23.8896	24.0096	23.6619	23.8537	23.1202	23.2164	23.5349	23.2905
G4VHN1	tr|G4VHN1|G4VHN1_SCHMA Putative importin beta-1 OS=Schistosoma mansoni GN=Smp_038080.1 PE=4 SV=1	13	101.21	-0.295352	19.9371	20.2621	19.4735	19.8909	20.2498	20.0837	20.2253	20.1863
G4VHN3	tr|G4VHN3|G4VHN3_SCHMA ATP synthase subunit beta OS=Schistosoma mansoni GN=Smp_038100 PE=3 SV=1	23	55.836	-0.812316	25.7294	25.6117	25.9465	25.7625	26.4561	26.5439	26.7245	26.5748
G4VHP2;G4VHP3	tr|G4VHP2|G4VHP2_SCHMA Putative o-methyltransferase OS=Schistosoma mansoni GN=Smp_052470 PE=4 SV=1;tr|G4VHP3|G4VHP3_SCHMA Putative o-methyltransferase OS=Schistosoma mansoni GN=Smp_012560 PE=4 SV=1	1	15.482	0.311827	18.1487	18.7495	18.7273	18.5419	18.2117	18.3445	18.1339	18.23
G4VHP4	tr|G4VHP4|G4VHP4_SCHMA Putative cullin OS=Schistosoma mansoni GN=Smp_150270 PE=3 SV=1	4	98.502	-1.97905			13.3944	13.3944	16.2589	13.7984	16.0632	15.3735
G4VHP9	tr|G4VHP9|G4VHP9_SCHMA Beta-hexosaminidase OS=Schistosoma mansoni GN=Smp_053900 PE=3 SV=1	6	60.937	-0.192056	19.201	19.8986	19.8307	19.6434	19.5738	19.939	19.9936	19.8355
G4VHQ2	tr|G4VHQ2|G4VHQ2_SCHMA 3-hydroxyacyl-CoA dehydrogenase OS=Schistosoma mansoni GN=Smp_151030 PE=3 SV=1	8	26.617	-0.751325	20.5568	20.604	21.4055	20.8555	21.8163	21.4958	21.5082	21.6068
G4VHQ4	tr|G4VHQ4|G4VHQ4_SCHMA Putative heterogeneous nuclear ribonucleoprotein OS=Schistosoma mansoni GN=Smp_053940.1 PE=4 SV=1	9	33.931	0.218244	23.0646	23.0782	23.0634	23.0687	22.8681	22.8287	22.8547	22.8505
G4VHS0	tr|G4VHS0|G4VHS0_SCHMA Putative 40s ribosomal protein S14 OS=Schistosoma mansoni GN=Smp_053830 PE=3 SV=1	7	16.319	0.29144	23.9953	23.6893	22.9419	23.5422	23.5023	23.188	23.0619	23.2507
G4VHT1;Q26595;G4V865	tr|G4VHT1|G4VHT1_SCHMA Tubulin alpha chain OS=Schistosoma mansoni GN=Smp_090120.2 PE=3 SV=1;tr|Q26595|Q26595_SCHMA Tubulin alpha chain OS=Schistosoma mansoni GN=sat1 PE=2 SV=1;tr|G4V865|G4V865_SCHMA Tubulin alpha chain OS=Schistosoma mansoni GN=Smp_103790	29	48.411	-0.359217	26.9479	26.9383	26.9844	26.9569	27.1736	27.4288	27.3459	27.3161
G4VHV6	tr|G4VHV6|G4VHV6_SCHMA Filamin-related OS=Schistosoma mansoni GN=Smp_198050 PE=4 SV=1	22	64.838	0.988773	22.7428	22.7494	22.6457	22.7126	21.6639	21.5138	21.9938	21.7239
G4VHW2	tr|G4VHW2|G4VHW2_SCHMA Uracil-DNA glycosylase OS=Schistosoma mansoni GN=Smp_158920 PE=3 SV=1	13	89.617	0.0927495	20.9438	21.1007	20.5228	20.8558	20.5707	20.7337	20.9845	20.763
G4VHW4	tr|G4VHW4|G4VHW4_SCHMA Protein kinase OS=Schistosoma mansoni GN=Smp_067810 PE=3 SV=1	4	41.376	0.12292	18.6969	18.171	18.951	18.6063	18.6272	18.4152	18.4078	18.4834
G4VHX9	tr|G4VHX9|G4VHX9_SCHMA Proteasome endopeptidase complex OS=Schistosoma mansoni GN=Smp_092280 PE=3 SV=1	9	28.086	0.1379	22.795	22.5425	22.5212	22.6196	22.5738	22.4284	22.4428	22.4817
G4VHY2	tr|G4VHY2|G4VHY2_SCHMA Uncharacterized protein OS=Schistosoma mansoni GN=Smp_172650 PE=4 SV=1	3	81.596	0.0763563	13.9962	14.6555	14.4417	14.3645	14.512	13.86	14.4924	14.2881
G4VHZ1	tr|G4VHZ1|G4VHZ1_SCHMA Carboxypeptidase OS=Schistosoma mansoni GN=Smp_172590 PE=3 SV=1	9	59.84	1.5097	22.1762	21.8631	22.4891	22.1761	21.3606	20.2192	20.4195	20.6664
G4VHZ8	tr|G4VHZ8|G4VHZ8_SCHMA Uncharacterized protein OS=Schistosoma mansoni GN=Smp_150170 PE=4 SV=1	2	74.581	-0.0245699	17.207	17.3196	17.1194	17.2153	17.8104	17.1007	16.8086	17.2399
G4VHZ9	tr|G4VHZ9|G4VHZ9_SCHMA Putative growth factor receptor-bound protein OS=Schistosoma mansoni GN=Smp_052250 PE=4 SV=1	1	35.033	M only				N/A	15.8036	15.7467	16.0868	15.8791
G4VI00	tr|G4VI00|G4VI00_SCHMA Putative geranylgeranyl transferase type II beta subunit OS=Schistosoma mansoni GN=Smp_150160 PE=4 SV=1	4	39.584	0.58851	17.4911	18.3742	19.0987	18.3213	17.4156	18.2715	17.5113	17.7328
G4VI02	tr|G4VI02|G4VI02_SCHMA Putative kunitz-type protease inhibitor OS=Schistosoma mansoni GN=Smp_052230 PE=4 SV=1	6	52.442	0.754899	19.8148	20.0561	19.5556	19.8089	18.8101	18.9232	19.4286	19.054
G4VI16	tr|G4VI16|G4VI16_SCHMA Succinate--CoA ligase [ADP/GDP-forming] subunit alpha, mitochondrial OS=Schistosoma mansoni GN=Smp_052060 PE=3 SV=1	10	36.58	-0.8943	22.7087	21.9185	22.6932	22.4401	23.2188	23.2953	23.4892	23.3344
G4VI26;G4VI27	tr|G4VI26|G4VI26_SCHMA Uncharacterized protein OS=Schistosoma mansoni GN=Smp_149990.1 PE=4 SV=1;tr|G4VI27|G4VI27_SCHMA Uncharacterized protein OS=Schistosoma mansoni GN=Smp_149990.2 PE=4 SV=1	5	77.694	0.93334	17.6132	17.7832	17.2801	17.5588	16.1354	16.7558	16.9853	16.6255
G4VI28	tr|G4VI28|G4VI28_SCHMA Uncharacterized protein OS=Schistosoma mansoni GN=Smp_051990 PE=4 SV=1	7	102.66	2.48812	18.5953	19.0015	18.7521	18.7829	16.3036	15.8733	16.7076	16.2948
G4VI38	tr|G4VI38|G4VI38_SCHMA Protein phosphatase methylesterase 1 (S33 family) OS=Schistosoma mansoni GN=Smp_211030 PE=4 SV=1	6	62.876	-0.2886	16.9974	15.8356	17.5939	16.809	16.8099	17.2923	17.1905	17.0976
G4VI40	tr|G4VI40|G4VI40_SCHMA Lar interacting protein (Lip)-related protein OS=Schistosoma mansoni GN=Smp_149910 PE=4 SV=1	3	230.06	-0.158594	15.2597	16.5092	16.0782	15.949	16.2037	16.1917	15.9275	16.1076
G4VI41	tr|G4VI41|G4VI41_SCHMA Putative chaperonin containing t-complex protein 1, eta subunit, tcph OS=Schistosoma mansoni GN=Smp_149900 PE=3 SV=1	23	59.064	-0.0108738	22.7068	22.4055	22.7476	22.62	22.7134	22.4563	22.7228	22.6308
G4VI62	tr|G4VI62|G4VI62_SCHMA Annexin OS=Schistosoma mansoni GN=Smp_045560 PE=3 SV=1	16	36.885	-0.257242	25.4008	25.7836	25.7052	25.6299	25.6521	25.8788	26.1304	25.8871
G4VI63	tr|G4VI63|G4VI63_SCHMA Annexin OS=Schistosoma mansoni GN=Smp_045550 PE=3 SV=1	18	53.713	-0.816015	22.0027	21.7611	21.8799	21.8813	22.4188	22.8177	22.8553	22.6973
G4VI64	tr|G4VI64|G4VI64_SCHMA Putative annexin OS=Schistosoma mansoni GN=Smp_207040 PE=4 SV=1	3	57.111	-1.70159	15.443	14.5527	14.8874	14.961	16.2368	17.2894	16.4617	16.6626
G4VI66	tr|G4VI66|G4VI66_SCHMA Annexin OS=Schistosoma mansoni GN=Smp_045500 PE=3 SV=1	10	60.075	0.179645	20.7935	20.7476	20.7961	20.7791	20.349	20.5582	20.8911	20.5994
G4VI74	tr|G4VI74|G4VI74_SCHMA Acetyl-CoA synthetase OS=Schistosoma mansoni GN=Smp_168520 PE=4 SV=1	5	78.517	-0.274801	17.4146	17.0219	16.6348	17.0238	16.9034	18.3615	16.6308	17.2986
G4VI80;G4VI78;G4VI77;G4VI79;G4VI76;G4VI75	tr|G4VI80|G4VI80_SCHMA Uncharacterized protein OS=Schistosoma mansoni GN=Smp_038730.10 PE=4 SV=1;tr|G4VI78|G4VI78_SCHMA Uncharacterized protein OS=Schistosoma mansoni GN=Smp_038730.2 PE=4 SV=1;tr|G4VI77|G4VI77_SCHMA Uncharacterized protein OS=Schistosoma m	12	109.76	0.0291613	20.0017	18.9859	19.4564	19.4813	19.9769	18.9825	19.3971	19.4522
G4VI89	tr|G4VI89|G4VI89_SCHMA Putative small nuclear ribonucleoprotein G (Snrnp-G) OS=Schistosoma mansoni GN=Smp_038680 PE=4 SV=1	2	8.6009	-0.0841303	20.0276	20.8008	19.8097	20.2127	20.0822	20.4562	20.3521	20.2968
G4VI91	tr|G4VI91|G4VI91_SCHMA alpha-1,2-Mannosidase OS=Schistosoma mansoni GN=Smp_143170 PE=3 SV=1	2	82.628	-0.0129519	19.4988	18.623	18.3609	18.8275	18.9513	18.8478	18.7224	18.8405
G4VI95	tr|G4VI95|G4VI95_SCHMA Putative eukaryotic translation elongation factor OS=Schistosoma mansoni GN=Smp_143150 PE=4 SV=1	27	60.651	-0.223541	23.7913	23.5294	23.1381	23.4862	23.7519	23.603	23.7745	23.7098
G4VI96	tr|G4VI96|G4VI96_SCHMA Putative eukaryotic translation elongation factor OS=Schistosoma mansoni GN=Smp_143140 PE=4 SV=1	16	36.404	-0.252678	23.3375	23.2684	22.8738	23.1599	23.4005	23.3104	23.5268	23.4126
G4VI98	tr|G4VI98|G4VI98_SCHMA Putative synaptotagmin OS=Schistosoma mansoni GN=Smp_050630 PE=4 SV=1	5	41.491	-0.429098	19.6707	19.9962	20.6834	20.1168	20.6065	20.3997	20.6315	20.5459
G4VI99	tr|G4VI99|G4VI99_SCHMA Glut4 vesicle protein-related OS=Schistosoma mansoni GN=Smp_050640 PE=4 SV=1	4	35.681	-0.0808507	20.3209	19.7438	20.1602	20.075	20.1312	19.9796	20.3567	20.1558
G4VIA5	tr|G4VIA5|G4VIA5_SCHMA Uncharacterized protein OS=Schistosoma mansoni GN=Smp_050730 PE=4 SV=1	3	106.77	1.5714	17.4063		17.5977	17.502	16.1709	15.2693	16.3515	15.9306
G4VIB3	tr|G4VIB3|G4VIB3_SCHMA Putative synaptojanin OS=Schistosoma mansoni GN=Smp_050830 PE=4 SV=1	2	60.028	0.897474			16.8097	16.8097	15.5911	16.52	15.6254	15.9122
G4VIB5	tr|G4VIB5|G4VIB5_SCHMA Phosphatidylinositol transfer protein OS=Schistosoma mansoni GN=Smp_137020 PE=4 SV=1	8	35.72	1.238	21.15	20.9199	21.1982	21.0893	19.921	19.7165	19.9165	19.8513
G4VIB9	tr|G4VIB9|G4VIB9_SCHMA NADH dehydrogenase [ubiquinone] 1 alpha subcomplex subunit 8 OS=Schistosoma mansoni GN=Smp_027480 PE=3 SV=1	8	20.686	-1.12068	19.126	20.0479	19.959	19.711	20.4926	20.8885	21.114	20.8317
G4VIC9	tr|G4VIC9|G4VIC9_SCHMA Uncharacterized protein OS=Schistosoma mansoni GN=Smp_050570 PE=4 SV=1	2	15.478	0.0557112		17.5498	17.8195	17.6846	17.703	17.9931	17.1906	17.6289
G4VID8	tr|G4VID8|G4VID8_SCHMA Calcium-transporting ATPase OS=Schistosoma mansoni GN=Smp_137170 PE=3 SV=1	24	133.57	0.162744	20.4964	20.5316	20.6463	20.5581	20.3963	20.2594	20.5303	20.3954
G4VIE6	tr|G4VIE6|G4VIE6_SCHMA Phospholipid scramblase OS=Schistosoma mansoni GN=Smp_008860 PE=3 SV=1	1	18.822	-0.479745	18.9975	19.1378	19.002	19.0458	19.5605	19.6668	19.3493	19.5255
G4VIF6	tr|G4VIF6|G4VIF6_SCHMA Putative dna replication helicase dna2 OS=Schistosoma mansoni GN=Smp_197880 PE=4 SV=1	2	155.3	0.0964397	19.9461	20.0134	20.0179	19.9925	19.6051	19.9814	20.1015	19.896
G4VIG2;A9NI59	tr|G4VIG2|G4VIG2_SCHMA Putative 26s protease regulatory subunit OS=Schistosoma mansoni GN=Smp_119310 PE=3 SV=1;tr|A9NI59|A9NI59_SCHMA 26S proteasome subunit RPT6 (Fragment) OS=Schistosoma mansoni GN=RPT6 PE=2 SV=1	18	48.531	0.0297999	21.3809	21.4595	21.2558	21.3654	21.1945	21.4736	21.3388	21.3356
G4VIG8	tr|G4VIG8|G4VIG8_SCHMA Putative synapsin OS=Schistosoma mansoni GN=Smp_126990 PE=4 SV=1	13	84.758	0.0338822	21.2539	21.0979	20.8236	21.0585	21.0525	20.9885	21.0328	21.0246
G4VIH9	tr|G4VIH9|G4VIH9_SCHMA Putative helicase OS=Schistosoma mansoni GN=Smp_008830 PE=3 SV=1	5	117.36	-0.0167985	16.1597	16.8976	16.7573	16.6049	16.8882	15.8893	17.0876	16.6217
G4VIJ1;G4VIJ0	tr|G4VIJ1|G4VIJ1_SCHMA Putative gelsolin OS=Schistosoma mansoni GN=Smp_008660.1 PE=4 SV=1;tr|G4VIJ0|G4VIJ0_SCHMA Putative gelsolin OS=Schistosoma mansoni GN=Smp_008660.2 PE=4 SV=1	31	41.709	0.215003	25.8259	25.9729	26.0623	25.9537	25.542	25.8245	25.8495	25.7387
G4VIJ2	tr|G4VIJ2|G4VIJ2_SCHMA Putative gelsolin (Fragment) OS=Schistosoma mansoni GN=Smp_197860 PE=4 SV=1	13	39.884	-2.25616	21.4865	21.529	22.301	21.7722	23.966	23.9389	24.1801	24.0283
G4VIJ4;G4VIJ5;G4VIJ6;G4VIJ7;G4VIJ8	tr|G4VIJ4|G4VIJ4_SCHMA Uncharacterized protein OS=Schistosoma mansoni GN=Smp_067000.2 PE=4 SV=1;tr|G4VIJ5|G4VIJ5_SCHMA Uncharacterized protein OS=Schistosoma mansoni GN=Smp_067000.1 PE=4 SV=1;tr|G4VIJ6|G4VIJ6_SCHMA Uncharacterized protein OS=Schistosoma ma	2	59.191	0.291334	16.4263	15.4657	17.0033	16.2984	16.0071			16.0071
G4VIK3	tr|G4VIK3|G4VIK3_SCHMA Putative mitochondrial import inner membrane translocase subunit tim44 OS=Schistosoma mansoni GN=Smp_158380 PE=4 SV=1	10	47.356	-0.895821	19.4821	19.6639	19.3273	19.4911	20.1585	20.4387	20.5635	20.3869
G4VIK7	tr|G4VIK7|G4VIK7_SCHMA Putative hsp70 binding protein hspbp OS=Schistosoma mansoni GN=Smp_066950 PE=4 SV=1	6	34.542	-1.3738	15.7144	19.2476	18.9346	17.9656	19.2235	19.689	19.1056	19.3394
G4VIK8	tr|G4VIK8|G4VIK8_SCHMA 60S ribosomal protein L29 OS=Schistosoma mansoni GN=Smp_066940 PE=3 SV=1	1	8.0953	0.134381	21.7645	21.5105	21.3148	21.5299	21.797	21.3467	21.0429	21.3955
G4VIL3	tr|G4VIL3|G4VIL3_SCHMA Putative 40s ribosomal protein S10 OS=Schistosoma mansoni GN=Smp_066890 PE=4 SV=1	6	17.761	-0.232208	23.9145	24.1773	23.6165	23.9028	24.0978	24.2387	24.0684	24.135
G4VIM8	tr|G4VIM8|G4VIM8_SCHMA RuvB-like helicase OS=Schistosoma mansoni GN=Smp_064050.2 PE=3 SV=1	11	50.286	0.561365	20.5647	20.4793	20.3366	20.4602	19.9383	20.261	19.4972	19.8988
G4VIN1;G4VIN0	tr|G4VIN1|G4VIN1_SCHMA Cell polarity protein OS=Schistosoma mansoni GN=Smp_064040.1 PE=3 SV=1;tr|G4VIN0|G4VIN0_SCHMA Cell polarity protein OS=Schistosoma mansoni GN=Smp_064040.2 PE=4 SV=1	12	52.632	-0.0333592	18.571	18.4311	19.2096	18.7372	18.9981	18.3319	18.9818	18.7706
G4VIN8	tr|G4VIN8|G4VIN8_SCHMA Putative synaptojanin OS=Schistosoma mansoni GN=Smp_159670 PE=4 SV=1	4	126.06	-0.527426	14.7588	15.0442	16.5562	15.4531	16.4469	15.5324	15.9621	15.9805
G4VIQ4	tr|G4VIQ4|G4VIQ4_SCHMA Phosphodiesterase OS=Schistosoma mansoni GN=Smp_135500 PE=3 SV=1	12	100.82	0.221003	18.8833	18.8461	18.8666	18.8653	19.1323	18.0372	18.7635	18.6443
G4VIW7	tr|G4VIW7|G4VIW7_SCHMA Putative heterogeneous nuclear ribonucleoprotein OS=Schistosoma mansoni GN=Smp_043100 PE=4 SV=1	3	28.65	0.836419	21.2684	20.7314	20.9807	20.9935	20.088	20.3825	20.0007	20.1571
G4VIW9	tr|G4VIW9|G4VIW9_SCHMA Putative universal stress protein OS=Schistosoma mansoni GN=Smp_043120 PE=4 SV=1	8	17.97	-0.362286	26.0994	26.2728	26.2832	26.2185	26.622	26.5342	26.5861	26.5807
G4VIX0	tr|G4VIX0|G4VIX0_SCHMA Uncharacterized protein Smp_202690 OS=Schistosoma mansoni GN=Smp_202690 PE=4 SV=1	6	15.25	-0.701331	24.3585	24.306	23.9299	24.1981	24.8614	25.0599	24.7771	24.8995
G4VIX7	tr|G4VIX7|G4VIX7_SCHMA Putative tetraspanin OS=Schistosoma mansoni GN=Smp_043210 PE=3 SV=1	1	32.451	-0.215798		18.1516	18.1355	18.1435	18.0553	18.2419	18.7808	18.3593
G4VIY9	tr|G4VIY9|G4VIY9_SCHMA UDP-n-acetylglucosamine pyrophosphorylase OS=Schistosoma mansoni GN=Smp_043350 PE=4 SV=1	2	55.297	-1.15803	15.8644	17.5721	16.5094	16.6486	17.8965	17.692	17.8315	17.8067
G4VIZ2	tr|G4VIZ2|G4VIZ2_SCHMA Uncharacterized protein OS=Schistosoma mansoni GN=Smp_053700 PE=4 SV=1	1	9.1987	-0.327858	20.8517	19.5752	19.9476	20.1248	20.7616	20.3976	20.1988	20.4527
G4VIZ9	tr|G4VIZ9|G4VIZ9_SCHMA Seryl-tRNA synthetase OS=Schistosoma mansoni GN=Smp_053610 PE=4 SV=1	27	70.651	-0.755891	21.5787	20.9533	22.5008	21.6776	22.8404	22.1263	22.3339	22.4335
G4VJ06	tr|G4VJ06|G4VJ06_SCHMA Serine/threonine kinase OS=Schistosoma mansoni GN=Smp_053560 PE=3 SV=1	3	40.984	0.698102	19.5165	19.3894	19.0707	19.3255	18.6382	18.6997	18.5444	18.6274
G4VJ08	tr|G4VJ08|G4VJ08_SCHMA Acyl-CoA thioesterase-related OS=Schistosoma mansoni GN=Smp_150820 PE=4 SV=1	7	52.882	-0.0056741	21.0086	20.6568	20.5871	20.7509	20.6334	20.9539	20.6823	20.7565
G4VJ11;G4VJ12	tr|G4VJ11|G4VJ11_SCHMA Putative aspartyl-tRNA synthetase OS=Schistosoma mansoni GN=Smp_053510.1 PE=3 SV=1;tr|G4VJ12|G4VJ12_SCHMA Putative aspartyl-tRNA synthetase OS=Schistosoma mansoni GN=Smp_053510.2 PE=4 SV=1	16	60.14	-0.499594	20.9732	21.0394	20.5301	20.8476	21.3067	21.3741	21.3607	21.3472
G4VJ23;G4VJ22	tr|G4VJ23|G4VJ23_SCHMA Putative oxysterol-binding protein 1 OS=Schistosoma mansoni GN=Smp_058980.2 PE=4 SV=1;tr|G4VJ22|G4VJ22_SCHMA Putative oxysterol-binding protein 1 OS=Schistosoma mansoni GN=Smp_058980.1 PE=4 SV=1	8	100.02	-0.786612	18.7419	17.5811	18.5667	18.2966	19.2256	18.7166	19.3074	19.0832
G4VJ43	tr|G4VJ43|G4VJ43_SCHMA MICOS complex subunit MIC60 OS=Schistosoma mansoni GN=Smp_059150 PE=3 SV=1	19	85.58	-0.817	20.9233	21.2798	20.6978	20.967	21.7862	21.6595	21.9062	21.784
G4VJ46;G4VJ45	tr|G4VJ46|G4VJ46_SCHMA Putative troponin I OS=Schistosoma mansoni GN=Smp_059170.1 PE=4 SV=1;tr|G4VJ45|G4VJ45_SCHMA Putative troponin I OS=Schistosoma mansoni GN=Smp_059170.2 PE=4 SV=1	1	32.374	-0.927458			15.927	15.927	16.5411	17.0202	17.0021	16.8545
G4VJ55	tr|G4VJ55|G4VJ55_SCHMA Uncharacterized protein OS=Schistosoma mansoni GN=Smp_153990 PE=4 SV=1	6	68.697	-0.303327	18.0842	18.3368	18.4267	18.2826	18.3918	19.1258	18.2401	18.5859
G4VJ60	tr|G4VJ60|G4VJ60_SCHMA Putative 4-hydroxyphenylpyruvate dioxygenase OS=Schistosoma mansoni GN=Smp_007960 PE=4 SV=1	2	38.923	M only				N/A	17.6249	15.847	16.1453	16.5391
G4VJ72	tr|G4VJ72|G4VJ72_SCHMA Xaa-Pro dipeptidase (M24 family) OS=Schistosoma mansoni GN=Smp_090800 PE=3 SV=1	5	49.086	-0.430217	17.8124	18.5183	18.0271	18.1193	18.5758	18.6342	18.4384	18.5495
G4VJ73	tr|G4VJ73|G4VJ73_SCHMA Putative xaa-pro dipeptidase pepd/pepq OS=Schistosoma mansoni GN=Smp_114900 PE=4 SV=1	1	6.1321	-0.182284	20.2725	19.7298	19.987	19.9964	20.4201	20.1309	19.9851	20.1787
G4VJ77	tr|G4VJ77|G4VJ77_SCHMA Uncharacterized protein OS=Schistosoma mansoni GN=Smp_171780 PE=4 SV=1	6	29.12	0.653572	22.8957	22.8219	22.8296	22.8491	21.7565	22.2514	22.5785	22.1955
G4VJ99	tr|G4VJ99|G4VJ99_SCHMA Putative heat shock protein OS=Schistosoma mansoni GN=Smp_155740 PE=3 SV=1	10	80.755	-0.0657357	20.3432	20.0369	20.1498	20.1767	20.2031	20.2261	20.2979	20.2424
G4VJC3	tr|G4VJC3|G4VJC3_SCHMA Uncharacterized protein OS=Schistosoma mansoni GN=Smp_198150 PE=4 SV=1	1	7.4515	0.209567	19.9401	19.8674	20.5333	20.1136		20.0002	19.8078	19.904
G4VJC6	tr|G4VJC6|G4VJC6_SCHMA Putative rhoptry associated membrane antigen OS=Schistosoma mansoni GN=Smp_070020 PE=4 SV=1	24	97.905	-1.11273	20.751	20.8306	20.23	20.6039	21.6547	21.8074	21.6878	21.7166
G4VJD5	tr|G4VJD5|G4VJD5_SCHMA Phosphoglycerate mutase OS=Schistosoma mansoni GN=Smp_096760 PE=3 SV=1	15	28.425	0.0163573	26.6143	26.3806	26.4002	26.465	26.4753	26.5655	26.3052	26.4487
G4VJD7	tr|G4VJD7|G4VJD7_SCHMA Uncharacterized protein OS=Schistosoma mansoni GN=Smp_096750 PE=3 SV=1	8	17.089	-0.200371	22.7725	21.71	22.5836	22.3554	22.7736	22.5414	22.3523	22.5557
G4VJD9	tr|G4VJD9|G4VJD9_SCHMA Enhancer of rudimentary homolog OS=Schistosoma mansoni GN=Smp_175210 PE=3 SV=1	2	12.028	-0.0576445	21.1827	20.7	19.9953	20.626	20.639	20.506	20.906	20.6837
G4VJE7	tr|G4VJE7|G4VJE7_SCHMA Uncharacterized protein OS=Schistosoma mansoni GN=Smp_042400 PE=4 SV=1	7	21.014	-0.138247	23.0075	23.1014	22.5709	22.8932	22.9386	23.1441	23.0117	23.0315
G4VJG1	tr|G4VJG1|G4VJG1_SCHMA Putative atp-dependent RNA helicase OS=Schistosoma mansoni GN=Smp_087270 PE=4 SV=1	1	85.423	0.595849	15.4473			15.4473	14.6836	14.5759	15.2948	14.8514
G4VJG3	tr|G4VJG3|G4VJG3_SCHMA Putative crp1/csrp1/crip1 OS=Schistosoma mansoni GN=Smp_087250 PE=4 SV=1	8	19.956	0.311701	26.0649	25.9317	25.7085	25.9017	25.6303	25.5868	25.5529	25.59
G4VJH0	tr|G4VJH0|G4VJH0_SCHMA Palmitoyltransferase OS=Schistosoma mansoni GN=Smp_169610 PE=3 SV=1	2	38.114	0.523387	17.5133	17.5104	17.3537	17.4591	17.2546	16.3193	17.2334	16.9358
G4VJI2	tr|G4VJI2|G4VJI2_SCHMA Uncharacterized protein OS=Schistosoma mansoni GN=Smp_166170 PE=4 SV=1	9	46.42	0.936446	21.8015	22.2843	21.9588	22.0149	21.0393	21.1068	21.0891	21.0784
G4VJJ1;G4VJJ2;G4VJJ0	tr|G4VJJ1|G4VJJ1_SCHMA Putative heat shock protein 70 (Hsp70)-interacting protein OS=Schistosoma mansoni GN=Smp_062420.3 PE=4 SV=1;tr|G4VJJ2|G4VJJ2_SCHMA Putative heat shock protein 70 (Hsp70)-interacting protein OS=Schistosoma mansoni GN=Smp_062420.1 PE=4	14	40.422	-0.168859	24.2128	24.39	24.4187	24.3405	24.2353	24.7278	24.5649	24.5094
G4VJJ9;G4VJJ8	tr|G4VJJ9|G4VJJ9_SCHMA Putative ral OS=Schistosoma mansoni GN=Smp_062510.1 PE=4 SV=1;tr|G4VJJ8|G4VJJ8_SCHMA Putative ral OS=Schistosoma mansoni GN=Smp_062510.2 PE=4 SV=1	4	22.394	0.51389	20.3242	20.52	19.8053	20.2165	19.3878	19.8877	19.8323	19.7026
G4VJK0	tr|G4VJK0|G4VJK0_SCHMA N-terminal acetlytransferase-related OS=Schistosoma mansoni GN=Smp_062520 PE=4 SV=1	9	109.67	-0.870822	17.2795	17.8657	16.3356	17.1603	18.0808	18.3273	17.6852	18.0311
G4VJK6	tr|G4VJK6|G4VJK6_SCHMA Putative beta-1,4-galactosyltransferase OS=Schistosoma mansoni GN=Smp_210280 PE=4 SV=1	4	20.348	1.03265	18.6547	20.0329	19.826	19.5045	18.987	18.3813	18.0473	18.4719
G4VJL0	tr|G4VJL0|G4VJL0_SCHMA Putative dynactin subunit OS=Schistosoma mansoni GN=Smp_062630 PE=4 SV=1	14	46.17	-0.649562	19.7956	20.2145	21.1208	20.377	20.8332	21.1213	21.1251	21.0265
G4VJL6	tr|G4VJL6|G4VJL6_SCHMA Putative clasp2 protein OS=Schistosoma mansoni GN=Smp_165350 PE=4 SV=1	10	129.1	0.815183	18.3323	18.0832	19.4763	18.6306	18.2147	17.1951	18.0364	17.8154
G4VJL7	tr|G4VJL7|G4VJL7_SCHMA Putative lipid-binding protein OS=Schistosoma mansoni GN=Smp_080210 PE=4 SV=1	4	38.488	0.377224	17.9511	17.7277	17.8314	17.8367	17.9898	17.5099	16.8787	17.4595
G4VJM9	tr|G4VJM9|G4VJM9_SCHMA Putative synaptophysin/synaptoporin OS=Schistosoma mansoni GN=Smp_080100 PE=4 SV=1	1	25.936	F only	19.867	18.375	21.0116	19.7512				N/A
G4VJN6	tr|G4VJN6|G4VJN6_SCHMA Uncharacterized protein OS=Schistosoma mansoni GN=Smp_015980 PE=4 SV=1	4	10.19	-1.42221	22.1287	21.9339	21.4815	21.848	23.0981	23.4928	23.2198	23.2702
G4VJN9	tr|G4VJN9|G4VJN9_SCHMA Putative 40s ribosomal protein S15 OS=Schistosoma mansoni GN=Smp_130850 PE=3 SV=1	1	16.833	-0.0630893	20.5899	19.9333	20.6538	20.3923	20.883	20.1441	20.3392	20.4554
G4VJP0	tr|G4VJP0|G4VJP0_SCHMA Putative beta-1,4-galactosyltransferase OS=Schistosoma mansoni GN=Smp_015920 PE=4 SV=1	1	40.284	-0.327369	18.1914	16.7034	16.2159	17.0369	17.384	17.4389	17.27	17.3643
G4VJP7	tr|G4VJP7|G4VJP7_SCHMA T-complex protein 1 subunit gamma OS=Schistosoma mansoni GN=Smp_041740 PE=3 SV=1	24	60.138	-0.0162863	23.7609	22.2412	23.8588	23.287	23.7497	22.8975	23.2625	23.3032
G4VJQ2	tr|G4VJQ2|G4VJQ2_SCHMA Putative collagen alpha-1(V) chain OS=Schistosoma mansoni GN=Smp_144910 PE=4 SV=1	3	92.481	-1.02775	17.6442	18.6144	15.9844	17.4143	19.0045	18.0178	18.3039	18.4421
G4VJQ3	tr|G4VJQ3|G4VJQ3_SCHMA Uncharacterized protein OS=Schistosoma mansoni GN=Smp_144920 PE=4 SV=1	4	24.891	-0.176932	19.4603	19.4413	19.0615	19.321	19.4846	19.2975	19.7118	19.498
G4VJQ6	tr|G4VJQ6|G4VJQ6_SCHMA Putative cellular nucleic acid binding protein OS=Schistosoma mansoni GN=Smp_179300.1 PE=4 SV=1	4	15.853	-0.02678	22.6356	23.2586	23.2781	23.0574	22.8896	23.2553	23.1078	23.0842
G4VJQ8	tr|G4VJQ8|G4VJQ8_SCHMA Putative cellular nucleic acid binding protein OS=Schistosoma mansoni GN=Smp_179300.3 PE=4 SV=1	1	18.887	-0.24667	22.4862	22.7916	22.6016	22.6265	22.7413	23.0304	22.8478	22.8732
G4VJS1	tr|G4VJS1|G4VJS1_SCHMA Putative 60s acidic ribosomal protein P1 OS=Schistosoma mansoni GN=Smp_041980 PE=3 SV=1	1	11.941	-0.196102		19.6524	19.4449	19.5486	19.5629	20.0635	19.6079	19.7448
G4VJS7	tr|G4VJS7|G4VJS7_SCHMA Uncharacterized protein OS=Schistosoma mansoni GN=Smp_042060 PE=4 SV=1	7	31.074	1.13769	20.8897	20.407	21.0678	20.7881	19.6281	19.6932	19.63	19.6505
G4VJT2;G4VJT1	tr|G4VJT2|G4VJT2_SCHMA Putative 60s ribosomal protein L10a OS=Schistosoma mansoni GN=Smp_042090.1 PE=4 SV=1;tr|G4VJT1|G4VJT1_SCHMA Putative 60s ribosomal protein L10a OS=Schistosoma mansoni GN=Smp_042090.3 PE=4 SV=1	4	24.885	0.204258	20.5692	19.4832	21.1735	20.4086	21.1164	19.0028	20.4939	20.2044
G4VJT4	tr|G4VJT4|G4VJT4_SCHMA Uncharacterized protein OS=Schistosoma mansoni GN=Smp_042110.1 PE=4 SV=1	2	22.254	-0.449991	18.5694	18.1396	18.6144	18.4412	17.9828	19.3176	19.3731	18.8911
G4VJT8;A0A223A3K1	tr|G4VJT8|G4VJT8_SCHMA Putative dynein light chain 1, cytoplasmic OS=Schistosoma mansoni GN=SmTAL13 PE=2 SV=1;tr|A0A223A3K1|A0A223A3K1_SCHMA TAL13 OS=Schistosoma mansoni PE=2 SV=1	5	21.099	F only	23.4899	23.1674	23.2127	23.29				N/A
G4VJU8	tr|G4VJU8|G4VJU8_SCHMA Uncharacterized protein OS=Schistosoma mansoni GN=Smp_078710 PE=4 SV=1	1	89.798	0.117284		14.5687		14.5687	13.6967	14.6204	15.0371	14.4514
G4VJV1	tr|G4VJV1|G4VJV1_SCHMA Putative microsomal signal peptidase 23 kD subunit (Spc22/23) OS=Schistosoma mansoni GN=Smp_175420 PE=4 SV=1	1	20.339	-0.486254	19.4126	19.699	18.8767	19.3295	20.0351	19.7312	19.6809	19.8157
G4VJV2	tr|G4VJV2|G4VJV2_SCHMA Putative dna repair protein xp-E OS=Schistosoma mansoni GN=Smp_175430 PE=4 SV=1	14	146.58	-0.0375216	17.1114	18.3219	18.2352	17.8895	17.6479	17.984	18.1492	17.927
G4VJV5	tr|G4VJV5|G4VJV5_SCHMA Uncharacterized protein OS=Schistosoma mansoni GN=Smp_175460 PE=4 SV=1	5	151.37	-0.132959	16.1012	22.6955	22.4347	20.4104	16.3893	22.4982	22.7427	20.5434
G4VJV7;G4VJV6	tr|G4VJV7|G4VJV7_SCHMA Putative fbxl20 OS=Schistosoma mansoni GN=Smp_097020.2 PE=4 SV=1;tr|G4VJV6|G4VJV6_SCHMA Putative fbxl20 OS=Schistosoma mansoni GN=Smp_097020.1 PE=4 SV=1	4	57.147	-1.32571	17.0572	15.9199	17.2527	16.7433	17.7249	18.6099	17.8721	18.069
G4VJX1	tr|G4VJX1|G4VJX1_SCHMA Uncharacterized protein OS=Schistosoma mansoni GN=Smp_136320 PE=4 SV=1	3	17.062	-0.23306	20.6775	20.0887	17.9516	19.5726	20.138	19.2706	20.0083	19.8057
G4VJX4	tr|G4VJX4|G4VJX4_SCHMA Putative tropomodulin OS=Schistosoma mansoni GN=Smp_003710 PE=4 SV=1	10	40.467	-0.0510957	22.3409	21.9941	22.4839	22.273	22.2508	22.1575	22.5639	22.3241
G4VJX8	tr|G4VJX8|G4VJX8_SCHMA Putative mitochondrial ATP synthase B chain OS=Schistosoma mansoni GN=Smp_154530 PE=4 SV=1	12	34.67	-0.949749	21.2769	21.4394	21.9027	21.5397	22.4523	22.2956	22.7204	22.4894
G4VJY2;G4VJY4;G4VJY3;G4VJY5	tr|G4VJY2|G4VJY2_SCHMA Putative suppressor of actin (Sac) OS=Schistosoma mansoni GN=Smp_060420.5 PE=4 SV=1;tr|G4VJY4|G4VJY4_SCHMA Putative suppressor of actin (Sac) OS=Schistosoma mansoni GN=Smp_060420.1 PE=4 SV=1;tr|G4VJY3|G4VJY3_SCHMA Putative suppressor	9	70.786	0.443722	18.5599	17.1408	18.7272	18.1427	18.1229	17.3525	17.6215	17.6989
G4VJY6	tr|G4VJY6|G4VJY6_SCHMA Putative rab 3 and OS=Schistosoma mansoni GN=Smp_154580 PE=4 SV=1	3	19.717	0.970681	21.6384	20.8919	21.3429	21.2911	19.9548	20.9539	20.0525	20.3204
G4VJY9	tr|G4VJY9|G4VJY9_SCHMA Nucleoside diphosphate kinase OS=Schistosoma mansoni GN=Smp_092750 PE=1 SV=1	8	16.85	-0.129933	25.624	25.4767	25.0058	25.3688	25.5725	25.6599	25.2639	25.4988
G4VK07	tr|G4VK07|G4VK07_SCHMA Uncharacterized protein OS=Schistosoma mansoni GN=Smp_053030 PE=4 SV=1	4	49.402	-0.0767934	16.5025	18.1828	16.6631	17.1161	15.9735	17.822	17.7833	17.1929
G4VK08	tr|G4VK08|G4VK08_SCHMA Snf7-related OS=Schistosoma mansoni GN=Smp_053040 PE=3 SV=1	2	23.627	-0.343135	18.943	17.8241	19.0562	18.6077	19.4027	19.2107	18.2393	18.9509
G4VK20;G4VK21	tr|G4VK20|G4VK20_SCHMA Cell polarity protein OS=Schistosoma mansoni GN=Smp_153310.1 PE=4 SV=1;tr|G4VK21|G4VK21_SCHMA Cell polarity protein OS=Schistosoma mansoni GN=Smp_153310.2 PE=4 SV=1	18	85.843	-0.494072	23.2397	23.0808	22.9573	23.0926	23.9245	23.2243	23.6112	23.5867
G4VK22	tr|G4VK22|G4VK22_SCHMA Uncharacterized protein OS=Schistosoma mansoni GN=Smp_153320 PE=4 SV=1	2	6.2611	0.261464	22.6498	22.7961	22.5553	22.6671	22.6492	22.5957	21.9719	22.4056
G4VK26	tr|G4VK26|G4VK26_SCHMA Putative ribonuclease z, chloroplast OS=Schistosoma mansoni GN=Smp_153350 PE=4 SV=1	4	21.783	1.10518	18.7395	17.5445	18.6177	18.3005	18.1338	15.8798	17.5726	17.1954
G4VK35	tr|G4VK35|G4VK35_SCHMA Putative serine/threonine protein phosphatase 2a regulatory subunit A OS=Schistosoma mansoni GN=Smp_153410 PE=4 SV=1	4	91.411	-0.0573468	17.3184	16.9536	16.1051	16.7924	16.8778	16.5956	17.0758	16.8497
G4VK43;G4VK42;G4VK44;G4VK45	tr|G4VK43|G4VK43_SCHMA Uncharacterized protein OS=Schistosoma mansoni GN=Smp_058140.4 PE=4 SV=1;tr|G4VK42|G4VK42_SCHMA Protein-L-isoaspartate O-methyltransferase OS=Schistosoma mansoni GN=Smp_058140.1 PE=3 SV=1;tr|G4VK44|G4VK44_SCHMA Protein-L-isoaspartate	7	22.106	-0.912147	21.2458	21.3888	21.1116	21.2488	22.2801	22.2916	21.911	22.1609
G4VK46	tr|G4VK46|G4VK46_SCHMA Uncharacterized protein OS=Schistosoma mansoni GN=Smp_058150.1 PE=4 SV=1	7	25.596	-1.01339	20.9375	21.1491	21.0804	21.0557	22.0145	21.9104	22.2822	22.0691
G4VK53	tr|G4VK53|G4VK53_SCHMA Putative nadh-ubiquinone oxidoreductase 24 kD subunit OS=Schistosoma mansoni GN=Smp_069770 PE=4 SV=1	8	27.432	-0.378369	21.5438	21.5494	21.3057	21.4663	21.6473	22.0526	21.8341	21.8447
G4VK63	tr|G4VK63|G4VK63_SCHMA Putative small nuclear ribonucleoprotein U1a,U2b OS=Schistosoma mansoni GN=Smp_069870 PE=4 SV=1	6	34.505	0.469997	21.2199	21.2641	21.4284	21.3041	20.877	21.1134	20.5119	20.8341
G4VK64	tr|G4VK64|G4VK64_SCHMA Putative small nuclear ribonucleoprotein U1a,U2b OS=Schistosoma mansoni GN=Smp_069880 PE=4 SV=1	3	25.33	0.200989	17.0926	18.3826	16.8089	17.428	17.6772	17.3247	16.6791	17.227
G4VK76	tr|G4VK76|G4VK76_SCHMA Rho GDP-dissociation inhibitor-related OS=Schistosoma mansoni GN=Smp_045610 PE=4 SV=1	13	22.969	-0.116984	22.9686	22.9176	22.9111	22.9324	23.1754	23.0918	22.8811	23.0494
G4VK82	tr|G4VK82|G4VK82_SCHMA Uncharacterized protein OS=Schistosoma mansoni GN=Smp_146720 PE=4 SV=1	12	247.83	-0.941084	17.1736	17.1264	17.0739	17.1246	18.1873	17.6945	18.3154	18.0657
G4VK88;G4VK89	tr|G4VK88|G4VK88_SCHMA Snf7-related OS=Schistosoma mansoni GN=Smp_045710.2 PE=3 SV=1;tr|G4VK89|G4VK89_SCHMA Snf7-related OS=Schistosoma mansoni GN=Smp_045710.1 PE=3 SV=1	4	24.538	0.0445229	20.585	20.5749	20.6681	20.6093	20.6109	20.6731	20.4104	20.5648
G4VK91	tr|G4VK91|G4VK91_SCHMA Putative calbindin-32 OS=Schistosoma mansoni GN=Smp_146280 PE=4 SV=1	2	42.784	-1.39973	14.9892	15.6092	15.4435	15.3473	16.9846	16.3992	16.8574	16.747
G4VKA2	tr|G4VKA2|G4VKA2_SCHMA Cytidylate kinase OS=Schistosoma mansoni GN=Smp_043620 PE=3 SV=1	7	14.44	0.329378	23.5291	23.2307	23.1422	23.3007	23.1485	23.3963	22.3691	22.9713
G4VKA6;G4VKA5;Q27778	tr|G4VKA6|G4VKA6_SCHMA ATP-dependent 6-phosphofructokinase OS=Schistosoma mansoni GN=Smp_043670.1 PE=3 SV=1;tr|G4VKA5|G4VKA5_SCHMA ATP-dependent 6-phosphofructokinase OS=Schistosoma mansoni GN=Smp_043670.2 PE=3 SV=1;sp|Q27778|PFKA_SCHMA ATP-dependent 6-pho	34	87.45	-0.476267	24.1381	24.2193	23.7085	24.022	24.5392	24.3971	24.5584	24.4982
G4VKA7	tr|G4VKA7|G4VKA7_SCHMA Putative ankyrin 2,3/unc44 OS=Schistosoma mansoni GN=Smp_145700 PE=4 SV=1	49	217.68	-0.422809	21.2732	20.8479	21.2195	21.1136	21.8028	21.2292	21.5771	21.5364
G4VKA9	tr|G4VKA9|G4VKA9_SCHMA Nardilysin (M16 family) OS=Schistosoma mansoni GN=Smp_156960.2 PE=4 SV=1	9	94.22	4.6233	19.2876	19.1393	18.6113	19.0128		13.39	15.3889	14.3895
G4VKB2	tr|G4VKB2|G4VKB2_SCHMA Uncharacterized protein OS=Schistosoma mansoni GN=Smp_156940 PE=4 SV=1	3	63.231	-1.08674	15.1101	16.1276	16.5374	15.925	16.3946	16.9898	17.6509	17.0117
G4VKB4	tr|G4VKB4|G4VKB4_SCHMA Uncharacterized protein OS=Schistosoma mansoni GN=Smp_064530 PE=4 SV=1	5	32.186	0.307237	19.7063	19.9672	20.0353	19.9029	19.7392	19.384	19.6639	19.5957
G4VKC0;G4VKB9	tr|G4VKC0|G4VKC0_SCHMA Uncharacterized protein OS=Schistosoma mansoni GN=Smp_156910.2 PE=4 SV=1;tr|G4VKB9|G4VKB9_SCHMA Uncharacterized protein OS=Schistosoma mansoni GN=Smp_156910.1 PE=4 SV=1	33	138.75	0.664394	22.3458	22.7383	22.1463	22.4102	21.8067	21.7301	21.7005	21.7458
G4VKC4	tr|G4VKC4|G4VKC4_SCHMA Uncharacterized protein OS=Schistosoma mansoni GN=Smp_064430 PE=4 SV=1	5	20.077	-0.21908	23.7077	23.6567	23.1873	23.5172	23.6532	23.8022	23.7535	23.7363
G4VKC5	tr|G4VKC5|G4VKC5_SCHMA Sec24-related C, d OS=Schistosoma mansoni GN=Smp_156880 PE=4 SV=1	9	110.33	-0.348131	18.5039	18.7609	18.1276	18.4641	19.0698	18.786	18.5809	18.8122
G4VKC8	tr|G4VKC8|G4VKC8_SCHMA Aspartate aminotransferase OS=Schistosoma mansoni GN=Smp_064380 PE=4 SV=1	15	42.845	-0.144487	22.5525	22.3225	22.7569	22.544	22.4614	22.8183	22.7857	22.6885
G4VKD0	tr|G4VKD0|G4VKD0_SCHMA Putative rna and export factor binding protein OS=Schistosoma mansoni GN=Smp_064360 PE=4 SV=1	3	35.951	0.75141	17.1383	15.9815	18.9984	17.3727	18.3214	15.5272	16.0152	16.6213
G4VKD4;G4VKD5	tr|G4VKD4|G4VKD4_SCHMA 26S proteasome subunit P28-related OS=Schistosoma mansoni GN=Smp_064320.2 PE=4 SV=1;tr|G4VKD5|G4VKD5_SCHMA 26S proteasome subunit P28-related OS=Schistosoma mansoni GN=Smp_064320.1 PE=4 SV=1	3	18.33	0.469722	21.1789	21.0925	20.7757	21.0157	20.4089	20.7469	20.4821	20.546
G4VKE4	tr|G4VKE4|G4VKE4_SCHMA Putative quinone oxidoreductase OS=Schistosoma mansoni GN=Smp_159230 PE=4 SV=1	17	46.742	0.113329	22.2278	22.0846	22.9417	22.4181	22.4576	21.9872	22.4694	22.3047
G4VKE8	tr|G4VKE8|G4VKE8_SCHMA Uncharacterized protein OS=Schistosoma mansoni GN=Smp_159200 PE=4 SV=1	2	159.98	-0.31227	15.1198	15.0356	14.613	14.9228	14.9815	15.6267	15.0971	15.2351
G4VKF3;G4VKF1;G4VKF2	tr|G4VKF3|G4VKF3_SCHMA Uncharacterized protein OS=Schistosoma mansoni GN=Smp_039490.1 PE=4 SV=1;tr|G4VKF1|G4VKF1_SCHMA Uncharacterized protein OS=Schistosoma mansoni GN=Smp_039490.2 PE=4 SV=1;tr|G4VKF2|G4VKF2_SCHMA Uncharacterized protein OS=Schistosoma ma	3	106.12	0.441526	16.2209		14.9995	15.6102	16.1333	14.7339	14.6388	15.1687
G4VKF7	tr|G4VKF7|G4VKF7_SCHMA Putative laminin OS=Schistosoma mansoni GN=Smp_143680 PE=4 SV=1	63	337.5	0.932282	20.3614	20.3299	20.6264	20.4392	19.5274	19.361	19.6325	19.507
G4VKI4	tr|G4VKI4|G4VKI4_SCHMA Uncharacterized protein OS=Schistosoma mansoni GN=Smp_040080 PE=4 SV=1	1	52.578	-0.303152	17.5301	17.8258	16.9641	17.44	17.6775	17.6101	17.9418	17.7431
G4VKI9	tr|G4VKI9|G4VKI9_SCHMA Phosphatidate cytidylyltransferase OS=Schistosoma mansoni GN=Smp_144030 PE=3 SV=1	2	57.768	0.596613	16.4218	14.8038	17.3522	16.1926	15.6448	14.8553	16.2878	15.596
G4VKJ4	tr|G4VKJ4|G4VKJ4_SCHMA Putative cortactin OS=Schistosoma mansoni GN=Smp_210150 PE=4 SV=1	5	29.558	0.000289146	19.7487	19.6977	19.6963	19.7143	19.4068	20.053	19.6821	19.714
G4VKK0	tr|G4VKK0|G4VKK0_SCHMA Putative beta-taxilin OS=Schistosoma mansoni GN=Smp_155180 PE=4 SV=1	2	23.122	-0.33377	18.2916	18.2285	18.6526	18.3909	19.5892	18.2002	18.3846	18.7247
G4VKL7	tr|G4VKL7|G4VKL7_SCHMA Uncharacterized protein OS=Schistosoma mansoni GN=Smp_169340 PE=4 SV=1	2	17.92	-0.788567	17.845	17.8411	18.0756	17.9206	19.115	19.0562	17.9561	18.7091
G4VKL9	tr|G4VKL9|G4VKL9_SCHMA Uncharacterized protein OS=Schistosoma mansoni GN=Smp_169320 PE=3 SV=1	2	63.718	-0.170339	16.5653	17.0844	16.411	16.6869	16.9415	16.8299	16.8004	16.8573
G4VKM8	tr|G4VKM8|G4VKM8_SCHMA Homeobox protein six-related OS=Schistosoma mansoni GN=Smp_210130 PE=4 SV=1	6	113.81	-0.777627	17.2146	16.2345		16.7246	17.8782	16.5517	18.0767	17.5022
G4VKN3	tr|G4VKN3|G4VKN3_SCHMA Uncharacterized protein OS=Schistosoma mansoni GN=Smp_103380 PE=4 SV=1	1	9.8586	-0.387639	21.4349	20.7899	21.072	21.0989	21.4892	21.7835	21.1871	21.4866
G4VKP3;G4VKP4;G4VKN9;G4VKN8;G4VKN7;G4VKP0;G4VKP2;G4VKP1	tr|G4VKP3|G4VKP3_SCHMA Putative vesicle-associated membrane protein (Vamp) OS=Schistosoma mansoni GN=Smp_136240.4 PE=4 SV=1;tr|G4VKP4|G4VKP4_SCHMA Putative vesicle-associated membrane protein (Vamp) OS=Schistosoma mansoni GN=Smp_136240.6 PE=4 SV=1;tr|G4VKN	12	40.27	0.429761	23.5352	23.3667	23.4161	23.4393	22.8395	23.1945	22.9946	23.0096
G4VKP9	tr|G4VKP9|G4VKP9_SCHMA Family C44 unassigned peptidase (C44 family) OS=Schistosoma mansoni GN=Smp_136260 PE=4 SV=1	9	76.899	0.0221323	18.1917	18.3899	18.1666	18.2494	18.3271	18.1779	18.1769	18.2273
G4VKR5	tr|G4VKR5|G4VKR5_SCHMA Clathrin light chain OS=Schistosoma mansoni GN=Smp_051080 PE=3 SV=1	7	23.882	-0.323886	20.8629	20.5664	20.7209	20.7167	20.9283	21.2471	20.9465	21.0406
G4VKS1	tr|G4VKS1|G4VKS1_SCHMA Putative phenylalanyl-tRNA synthetase mitochondrial OS=Schistosoma mansoni GN=Smp_149430 PE=4 SV=1	4	57.595	-0.0896109	16.0607	16.2957	16.7648	16.3737	15.3444	16.9997	17.0459	16.4634
G4VKS6	tr|G4VKS6|G4VKS6_SCHMA Uncharacterized protein OS=Schistosoma mansoni GN=Smp_149480 PE=4 SV=1	2	11.911	-0.145681	20.0897	20.0349	19.8068	19.9771	19.9234	20.1801	20.2649	20.1228
G4VKT0	tr|G4VKT0|G4VKT0_SCHMA Putative marvel-containing potential lipid raft-associated protein OS=Schistosoma mansoni GN=Smp_046290 PE=4 SV=1	2	23.367	0.49256	24.6626	24.8227	24.4596	24.6483	23.8586	24.1811	24.4275	24.1557
G4VKT1	tr|G4VKT1|G4VKT1_SCHMA Putative syntenin-2 (Syndecan-binding protein 2) OS=Schistosoma mansoni GN=Smp_147000 PE=4 SV=1	2	30.845	-0.719879	16.7159	16.7495	18.3702	17.2785	17.2121	18.1507	18.6324	17.9984
G4VKT8	tr|G4VKT8|G4VKT8_SCHMA Putative atp synthase alpha subunit vacuolar OS=Schistosoma mansoni GN=Smp_147050 PE=3 SV=1	22	69.731	0.213496	22.6037	22.4028	22.2657	22.4241	22.3037	22.1462	22.1818	22.2106
G4VKU4	tr|G4VKU4|G4VKU4_SCHMA Uncharacterized protein OS=Schistosoma mansoni GN=Smp_011010 PE=4 SV=1	6	31.659	-1.0272	19.6318	19.81	18.3018	19.2479	20.378	20.488	19.9591	20.2751
G4VKU6	tr|G4VKU6|G4VKU6_SCHMA Uncharacterized protein OS=Schistosoma mansoni GN=Smp_128000 PE=4 SV=1	3	22.344	0.84745	21.0694	20.7042	20.3812	20.7183	18.7955	20.3729	20.444	19.8708
G4VKU9	tr|G4VKU9|G4VKU9_SCHMA Putative syntaxin OS=Schistosoma mansoni GN=Smp_176270 PE=4 SV=1	2	45.097	-1.39818		15.2642	15.3891	15.3266	16.2446	17.431	16.4988	16.7248
G4VKV4	tr|G4VKV4|G4VKV4_SCHMA Signal recognition particle 54 kDa protein OS=Schistosoma mansoni GN=SRP54 PE=3 SV=1	9	57.941	-0.953182	17.8457	17.9896	18.5397	18.125	19.4328	19.1697	18.6321	19.0782
G4VKV6	tr|G4VKV6|G4VKV6_SCHMA Uncharacterized protein OS=Schistosoma mansoni GN=Smp_154230.2 PE=4 SV=1	7	37.749	-0.413647	19.4583	20.2869	20.2686	20.0046	20.3845	20.5281	20.3422	20.4183
G4VKW2	tr|G4VKW2|G4VKW2_SCHMA Putative programmed cell death protein OS=Schistosoma mansoni GN=Smp_136640 PE=4 SV=1	4	20.016	-0.414318	23.1239	22.7622	22.7884	22.8915	23.2784	23.5055	23.1336	23.3058
G4VKW3	tr|G4VKW3|G4VKW3_SCHMA Putative small nuclear ribonucleoprotein-associated protein OS=Schistosoma mansoni GN=Smp_026770 PE=4 SV=1	4	20.834	0.349496	21.39	21.5194	21.5827	21.4974	21.2292	21.2595	20.955	21.1479
G4VKW8	tr|G4VKW8|G4VKW8_SCHMA Amino acid transporter OS=Schistosoma mansoni GN=Smp_016600 PE=3 SV=1	11	60.562	-0.554451	20.2428	20.6441	21.0438	20.6436	21.2002	20.9182	21.4757	21.198
G4VKX1	tr|G4VKX1|G4VKX1_SCHMA NDRG4 protein (S33 family) OS=Schistosoma mansoni GN=Smp_131250 PE=4 SV=1	3	25.811	-0.302146	20.4116	19.9041	20.5645	20.2934	20.7331	20.6494	20.4042	20.5955
G4VKX2	tr|G4VKX2|G4VKX2_SCHMA 4a-hydroxytetrahydrobiopterin dehydratase OS=Schistosoma mansoni GN=Smp_016670 PE=3 SV=1	2	12.343	-1.06989	20.3099	20.1057	20.4135	20.2764	21.2893	21.3077	21.4417	21.3462
G4VKX7	tr|G4VKX7|G4VKX7_SCHMA Putative bcl-2 homologous antagonist/killer (Bak) OS=Schistosoma mansoni GN=Smp_131280 PE=4 SV=1	7	110.87	0.0585295	17.2382	17.8678	17.462	17.5226	17.5532	17.2364	17.6027	17.4641
G4VKY4	tr|G4VKY4|G4VKY4_SCHMA Tubulin alpha chain OS=Schistosoma mansoni GN=Smp_016780 PE=3 SV=1	5	50.136	-0.865593	19.727	20.3145	20.4587	20.1667	20.784	21.347	20.9659	21.0323
G4VKZ7	tr|G4VKZ7|G4VKZ7_SCHMA Putative mannosidase, endo-alpha OS=Schistosoma mansoni GN=Smp_016880 PE=4 SV=1	8	68.766	-0.709864	18.6348	18.7067	18.7435	18.695	19.2949	19.6149	19.3047	19.4048
G4VL02	tr|G4VL02|G4VL02_SCHMA Putative glucosidase II beta subunit OS=Schistosoma mansoni GN=Smp_131400 PE=4 SV=1	7	48.327	-0.181651	20.4975	20.3705	20.2786	20.3822	20.1813	20.6484	20.8618	20.5638
G4VL05	tr|G4VL05|G4VL05_SCHMA Testis-specific protein pbs13-related OS=Schistosoma mansoni GN=Smp_131420 PE=4 SV=1	2	59.603	-0.400299	13.3687	15.5315	15.6367	14.8456	15.5791	15.6101	14.5485	15.2459
G4VL08	tr|G4VL08|G4VL08_SCHMA Putative steroid dehydrogenase OS=Schistosoma mansoni GN=Smp_178940 PE=4 SV=1	2	32.122	1.08086	18.707	18.3734	19.3429	18.8078	17.7462		17.7077	17.7269
G4VL14;G4VL15	tr|G4VL14|G4VL14_SCHMA Putative prefoldin subunit OS=Schistosoma mansoni GN=Smp_009390.2 PE=4 SV=1;tr|G4VL15|G4VL15_SCHMA Putative prefoldin subunit OS=Schistosoma mansoni GN=Smp_009390.1 PE=4 SV=1	3	13.452	-0.320947	19.155	19.2454	19.0267	19.1424	19.7725	19.6719	18.9456	19.4633
G4VL24;G4VL25	tr|G4VL24|G4VL24_SCHMA Uncharacterized protein OS=Schistosoma mansoni GN=Smp_009320.1 PE=3 SV=1;tr|G4VL25|G4VL25_SCHMA Uncharacterized protein OS=Schistosoma mansoni GN=Smp_009320.2 PE=3 SV=1	3	9.934	-0.0475031	22.4663	21.8521	21.7728	22.0304	22.5903	22.2236	21.4199	22.0779
G4VL28;G4VL27;G4VL30;G4VL29;G4VL26;O61652;Q9N2M6	tr|G4VL28|G4VL28_SCHMA Putative plasminogen activator inhibitor 1 RNA-binding protein (PAI1 RNA-binding protein 1) (PAI-RBP1) (SERPINE1 mRNA-binding protein 1) OS=Schistosoma mansoni GN=Smp_009310.2 PE=4 SV=1;tr|G4VL27|G4VL27_SCHMA Putative plasminogen act	5	46.102	0.00910656	20.4369	20.3512	20.5778	20.4553	20.4179	20.7684	20.1523	20.4462
G4VL47	tr|G4VL47|G4VL47_SCHMA Carboxypeptidase OS=Schistosoma mansoni GN=Smp_163970 PE=3 SV=1	4	88.983	-0.941787	15.8699	15.6308	14.4402	15.3136	16.6235	16.2107	15.932	16.2554
G4VL48	tr|G4VL48|G4VL48_SCHMA Putative faf1 protein OS=Schistosoma mansoni GN=Smp_077540 PE=4 SV=1	2	110.86	-0.6447	17.1551	15.5978		16.3764	16.9667	16.9773	17.1195	17.0211
G4VL59	tr|G4VL59|G4VL59_SCHMA Putative golgi associated, gamma adaptin ear containing,arf binding protein 1 (Gga1) OS=Schistosoma mansoni GN=Smp_164030 PE=4 SV=1	6	69.015	-1.03703	16.4741	18.1621	17.5064	17.3808	18.6539	18.1014	18.4983	18.4179
G4VL68;C3VEV0	tr|G4VL68|G4VL68_SCHMA Putative annexin OS=Schistosoma mansoni GN=Smp_077720 PE=4 SV=1;tr|C3VEV0|C3VEV0_SCHMA Annexin B2 OS=Schistosoma mansoni PE=2 SV=1	27	39.392	0.631386	26.3312	26.2375	26.427	26.3319	25.5768	25.756	25.7687	25.7005
G4VL82;G4VL83	tr|G4VL82|G4VL82_SCHMA Putative annexin OS=Schistosoma mansoni GN=Smp_077880.1 PE=4 SV=1;tr|G4VL83|G4VL83_SCHMA Putative annexin OS=Schistosoma mansoni GN=Smp_077880.2 PE=4 SV=1	4	34.267	3.88425	18.8781	19.3595	19.4185	19.2187		15.7762	14.8927	15.3345
G4VL99	tr|G4VL99|G4VL99_SCHMA Annexin OS=Schistosoma mansoni GN=Smp_074140 PE=3 SV=1	15	39.098	0.0999657	25.1537	25.1971	25.1152	25.1554	24.8778	25.1034	25.185	25.0554
G4VLA4	tr|G4VLA4|G4VLA4_SCHMA Uncharacterized protein OS=Schistosoma mansoni GN=Smp_074190 PE=4 SV=1	4	32.79	-0.762343	18.1216	18.946	18.202	18.4232	19.0568	18.9441	19.5558	19.1855
G4VLB3	tr|G4VLB3|G4VLB3_SCHMA Putative retinoblastoma-binding protein 4 (Rbbp4) OS=Schistosoma mansoni GN=Smp_212260 PE=4 SV=1	8	47.017	0.168628	20.5123	20.6421	20.9465	20.7003	20.557	20.5633	20.4747	20.5317
G4VLB5	tr|G4VLB5|G4VLB5_SCHMA Microtubule-associated protein OS=Schistosoma mansoni GN=Smp_162230 PE=4 SV=1	1	44.466	F only	15.4825	15.9172	15.68	15.6932				N/A
G4VLB8	tr|G4VLB8|G4VLB8_SCHMA Putative phosphatidylinositol-binding clathrin assembly protein OS=Schistosoma mansoni GN=Smp_162260 PE=4 SV=1	9	80.142	-0.373852	19.9796	20.5358	19.8609	20.1254	20.3459	20.4559	20.6961	20.4993
G4VLC9;G4VLC8	tr|G4VLC9|G4VLC9_SCHMA Putative arsenite-resistance protein 2 OS=Schistosoma mansoni GN=Smp_162310.2 PE=4 SV=1;tr|G4VLC8|G4VLC8_SCHMA Putative arsenite-resistance protein 2 OS=Schistosoma mansoni GN=Smp_162310.1 PE=4 SV=1	4	103.06	0.119957	16.6427	16.4175	15.3487	16.1363	16.2233	15.1635	16.6623	16.0164
G4VLD4;G4VLD5;G4VLD3	tr|G4VLD4|G4VLD4_SCHMA Putative heterogeneous nuclear ribonucleoprotein (Hnrnp) OS=Schistosoma mansoni GN=Smp_179270.1 PE=4 SV=1;tr|G4VLD5|G4VLD5_SCHMA Putative heterogeneous nuclear ribonucleoprotein (Hnrnp) OS=Schistosoma mansoni GN=Smp_179270.3 PE=4 SV=	3	42.989	0.107052	17.0755	17.4499	17.5232	17.3495	17.1822	17.5921	16.9532	17.2425
G4VLE3	tr|G4VLE3|G4VLE3_SCHMA Putative alpha-galactosidase/alpha-n-acetylgalactosamini da se OS=Schistosoma mansoni GN=Smp_089290 PE=3 SV=1	5	46.751	1.03193	18.6829	18.6075	18.7412	18.6772	17.9211	17.1523	17.8625	17.6453
G4VLF6;G4VLF7	tr|G4VLF6|G4VLF6_SCHMA Putative 60s ribosomal protein L24 OS=Schistosoma mansoni GN=Smp_001830.2 PE=4 SV=1;tr|G4VLF7|G4VLF7_SCHMA Putative 60s ribosomal protein L24 OS=Schistosoma mansoni GN=Smp_001830.1 PE=4 SV=1	2	12.904	-0.679312	16.5326	16.9512	18.0877	17.1905	17.9585	18.129	17.5219	17.8698
G4VLF8	tr|G4VLF8|G4VLF8_SCHMA Rgpr-related OS=Schistosoma mansoni GN=Smp_123060 PE=4 SV=1	6	158.62	-0.151948	16.6889	17.1302	16.5475	16.7888	16.7051	17.0737	17.0435	16.9408
G4VLG0	tr|G4VLG0|G4VLG0_SCHMA Putative sarcoplasmic calcium-binding protein (SCP) OS=Schistosoma mansoni GN=Smp_123080 PE=4 SV=1	24	54.845	-1.20397	23.5324	23.3749	23.5348	23.4807	24.6128	24.7759	24.6653	24.6847
G4VLG8	tr|G4VLG8|G4VLG8_SCHMA Uncharacterized protein OS=Schistosoma mansoni GN=Smp_123110 PE=4 SV=1	8	42.336	1.30675	20.7571	20.5858	21.0142	20.7857	18.9244	19.7726	19.74	19.479
G4VLH0	tr|G4VLH0|G4VLH0_SCHMA Uncharacterized protein OS=Schistosoma mansoni GN=Smp_001950 PE=4 SV=1	1	25.303	-0.0526694	17.12			17.12	18.0746	17.3214	16.1221	17.1727
G4VLH5	tr|G4VLH5|G4VLH5_SCHMA Uncharacterized protein OS=Schistosoma mansoni GN=Smp_212310 PE=4 SV=1	4	71.573	-1.27612	16.427	17.8191	16.683	16.9764	18.2576	18.1917	18.3081	18.2525
G4VLH7	tr|G4VLH7|G4VLH7_SCHMA Putative dynactin P62 subunit OS=Schistosoma mansoni GN=Smp_123165 PE=4 SV=1	7	69.94	-0.836556	17.3091	17.3555	16.9622	17.2089	18.0082	17.8558	18.2726	18.0455
G4VLH9	tr|G4VLH9|G4VLH9_SCHMA Nedd-4-like E3 ubiquitin-protein ligase OS=Schistosoma mansoni GN=Smp_123180 PE=4 SV=1	2	94.673	-0.220364	16.3876	16.5925	16.6348	16.5383	16.8053	16.7121		16.7587
G4VLI2	tr|G4VLI2|G4VLI2_SCHMA S-adenosylmethionine synthase OS=Schistosoma mansoni GN=Smp_002080 PE=3 SV=1	4	35.996	-0.233395	18.6992	18.9917	16.9395	18.2101	18.0058	18.8949	18.4299	18.4435
G4VLJ0	tr|G4VLJ0|G4VLJ0_SCHMA ATP synthase subunit alpha OS=Schistosoma mansoni GN=Smp_002880.1 PE=3 SV=1	29	59.643	-0.843956	25.7774	25.2201	25.4908	25.4961	26.3275	26.2811	26.4117	26.3401
G4VLJ3	tr|G4VLJ3|G4VLJ3_SCHMA Acid phosphatase-related OS=Schistosoma mansoni GN=Smp_123670 PE=3 SV=1	4	52.027	-0.684334	18.0704	18.4317	18.4413	18.3145	19.2583	18.6452	19.0929	18.9988
G4VLL3	tr|G4VLL3|G4VLL3_SCHMA Transcription factor BTF3 OS=Schistosoma mansoni GN=Smp_002180.1 PE=3 SV=1	4	17.507	-0.382198	21.2404	20.7045	20.9756	20.9735	21.5448	21.6985	20.8238	21.3557
G4VLL4	tr|G4VLL4|G4VLL4_SCHMA Putative pre-mRNA cleavage factor im, 25kD subunit OS=Schistosoma mansoni GN=Smp_002190 PE=4 SV=1	3	24.161	0.87552	17.5816	18.5083	18.0351	18.0417	17.2731	18.3595	15.866	17.1662
G4VLL6	tr|G4VLL6|G4VLL6_SCHMA Putative sj-Ts1 OS=Schistosoma mansoni GN=Smp_123270 PE=4 SV=1	1	9.3536	0.21741	22.6149	21.1336	21.5647	21.7711	21.253	21.7356	21.6723	21.5537
G4VLM1	tr|G4VLM1|G4VLM1_SCHMA Kinesin-like protein OS=Schistosoma mansoni GN=Smp_002280 PE=3 SV=1	3	104.81	-0.260999		14.1332	15.0586	14.5959	14.3207	15.6469	14.603	14.8569
G4VLM8	tr|G4VLM8|G4VLM8_SCHMA Putative sorting nexin OS=Schistosoma mansoni GN=Smp_091730 PE=4 SV=1	4	19.495	-0.05799	21.2163	21.1774	20.7489	21.0475	21.1357	21.4152	20.7657	21.1055
G4VLN1	tr|G4VLN1|G4VLN1_SCHMA Uncharacterized protein Smp_202970 OS=Schistosoma mansoni GN=Smp_202970 PE=3 SV=1	7	42.087	-1.15294	22.4265	22.5157	24.0567	22.9996	23.9144	24.4804	24.0629	24.1526
G4VLN2	tr|G4VLN2|G4VLN2_SCHMA Mitogen-activated protein kinase OS=Schistosoma mansoni GN=Smp_172240 PE=4 SV=1	5	43.917	0.348102	20.5268	20.2216	20.2209	20.3231	20.1345	20.1348	19.6557	19.975
G4VLN4	tr|G4VLN4|G4VLN4_SCHMA Uncharacterized protein OS=Schistosoma mansoni GN=Smp_172220 PE=4 SV=1	2	44.65	-0.369841		18.3844	17.1423	17.7634	18.0856	17.8368	18.4772	18.1332
G4VLN5	tr|G4VLN5|G4VLN5_SCHMA Uncharacterized protein Smp_203130 OS=Schistosoma mansoni GN=Smp_203130 PE=3 SV=1	1	20.315	-1.36283	20.3849	20.2597	21.5676	20.7374	21.8289	22.0514	22.4204	22.1002
G4VLN7	tr|G4VLN7|G4VLN7_SCHMA Phospholipid-transporting ATPase OS=Schistosoma mansoni GN=Smp_091650 PE=3 SV=1	5	114.95	1.58871	16.7651	17.885	17.9718	17.5406	16.0525	15.6611	16.1423	15.9519
G4VLN8	tr|G4VLN8|G4VLN8_SCHMA 40S ribosomal protein S24 OS=Schistosoma mansoni GN=Smp_091640 PE=3 SV=1	2	14.952	-0.146378	19.5669	19.0015	19.7185	19.429	19.9852	19.2674	19.4734	19.5753
G4VLP3	tr|G4VLP3|G4VLP3_SCHMA MEG-8 family OS=Schistosoma mansoni GN=Smp_172180 PE=4 SV=1	3	15.839	-3.34165			18.0449	18.0449	21.1939	21.612	21.3536	21.3865
G4VLQ2	tr|G4VLQ2|G4VLQ2_SCHMA Mitochondrial pyruvate carrier OS=Schistosoma mansoni GN=Smp_099420 PE=3 SV=1	3	12.591	-2.73765	17.8031	14.8895	18.6287	17.1071	20.2906	19.473	19.7707	19.8448
G4VLQ3	tr|G4VLQ3|G4VLQ3_SCHMA Uncharacterized protein Smp_203140 OS=Schistosoma mansoni GN=Smp_203140 PE=4 SV=1	2	15.832	0.99949	18.6918	18.724	18.5772	18.6643	17.6783		17.6514	17.6648
G4VLR0	tr|G4VLR0|G4VLR0_SCHMA Phosphomannomutase OS=Schistosoma mansoni GN=Smp_087860 PE=3 SV=1	11	28.062	-0.292324	22.1635	22.3766	22.2582	22.2661	22.5226	22.6969	22.4557	22.5584
G4VLR6;G4VLR5	tr|G4VLR6|G4VLR6_SCHMA Putative golgi reassembly stacking protein 2 (Grasp2) OS=Schistosoma mansoni GN=Smp_169990.2 PE=4 SV=1;tr|G4VLR5|G4VLR5_SCHMA Putative golgi reassembly stacking protein 2 (Grasp2) OS=Schistosoma mansoni GN=Smp_169990.1 PE=4 SV=1	3	49.516	-0.346999	19.8676	19.3129	19.7637	19.6481	19.8157	20.2028	19.9667	19.9951
G4VLR7	tr|G4VLR7|G4VLR7_SCHMA NEDD8-activating enzyme E1 regulatory subunit OS=Schistosoma mansoni GN=Smp_087920 PE=3 SV=1	1	68.958	-0.459906	14.5949	15.2818	14.8659	14.9142	15.6098		15.1384	15.3741
G4VLS7;G4VLS8;B8Y6H1	tr|G4VLS7|G4VLS7_SCHMA Rna-binding ras-gap sh3 binding protein related OS=Schistosoma mansoni GN=Smp_030830.2 PE=4 SV=1;tr|G4VLS8|G4VLS8_SCHMA Rna-binding ras-gap sh3 binding protein related OS=Schistosoma mansoni GN=Smp_030830.1 PE=4 SV=1;tr|B8Y6H1|B8Y6H1	12	41.432	0.316567	22.0712	22.3726	22.2024	22.2154	21.5521	22.2235	21.9209	21.8988
G4VLT6;G4VLT7	tr|G4VLT6|G4VLT6_SCHMA Putative cop9 signalosome complex subunit OS=Schistosoma mansoni GN=Smp_138920.2 PE=4 SV=1;tr|G4VLT7|G4VLT7_SCHMA Putative cop9 signalosome complex subunit OS=Schistosoma mansoni GN=Smp_138920.1 PE=4 SV=1	9	62.523	-0.0726609	19.124	19.116	18.605	18.9483	18.9353	19.0618	19.0659	19.021
G4VLU0;G4VLT9	tr|G4VLU0|G4VLU0_SCHMA Putative mitochondrial import receptor subunit tom22 OS=Schistosoma mansoni GN=Smp_030920.2 PE=4 SV=1;tr|G4VLT9|G4VLT9_SCHMA Putative mitochondrial import receptor subunit tom22 OS=Schistosoma mansoni GN=Smp_030920.1 PE=4 SV=1	3	19.282	-0.732497	19.1105	19.5304	19.2064	19.2824	19.9111	19.9422	20.1914	20.0149
G4VLU3;G4VLU4	tr|G4VLU3|G4VLU3_SCHMA Putative glutamyl-tRNA synthetase, cytoplasmic (Glutamate--tRNA ligase) (Glurs) OS=Schistosoma mansoni GN=Smp_138930.2 PE=3 SV=1;tr|G4VLU4|G4VLU4_SCHMA Putative glutamyl-tRNA synthetase, cytoplasmic (Glutamate--tRNA ligase) (Glurs) O	28	151.8	-0.0470774	20.8216	20.3316	19.8084	20.3205	20.5724	20.4068	20.1237	20.3676
G4VLU7	tr|G4VLU7|G4VLU7_SCHMA Putative spfh domain protein 1 OS=Schistosoma mansoni GN=Smp_138960 PE=4 SV=1	4	75.043	0.562247	17.945	18.2402	17.9062	18.0305	17.2665	17.3317	17.8065	17.4682
G4VLU8	tr|G4VLU8|G4VLU8_SCHMA Putative glycerol kinase OS=Schistosoma mansoni GN=Smp_141770 PE=4 SV=1	1	69.467	0.217642	16.5094			16.5094	16.2002	16.0925	16.5827	16.2918
G4VLU9;G4VLV0	tr|G4VLU9|G4VLU9_SCHMA Putative nadh-ubiquinone oxidoreductase ashi subunit OS=Schistosoma mansoni GN=Smp_036400.2 PE=4 SV=1;tr|G4VLV0|G4VLV0_SCHMA Putative nadh-ubiquinone oxidoreductase ashi subunit OS=Schistosoma mansoni GN=Smp_036400.1 PE=4 SV=1	2	14.263	-0.415709	19.258	19.4007	20.453	19.7039	19.8111	20.5734	19.9744	20.1196
G4VLV7	tr|G4VLV7|G4VLV7_SCHMA Uncharacterized protein OS=Schistosoma mansoni GN=Smp_147120 PE=4 SV=1	1	33.098	-0.571832	15.7033	15.2427	15.897	15.6143	16.3616	15.7758	16.4211	16.1862
G4VLW1	tr|G4VLW1|G4VLW1_SCHMA Putative actin OS=Schistosoma mansoni GN=Smp_183710 PE=3 SV=1	2	41.733	-0.565245	23.7729	23.8625	24.1424	23.9259	24.2924	24.4855	24.6957	24.4912
G4VLW5	tr|G4VLW5|G4VLW5_SCHMA Hypothetical Schistosoma spp. protein UPF0506 OS=Schistosoma mansoni GN=Smp_046630 PE=4 SV=1	1	10.799	0.507506	24.9007	24.2601	24.1031	24.4213	23.919	24.0599	23.7624	23.9138
G4VLX3	tr|G4VLX3|G4VLX3_SCHMA Putative carbonic anhydrase OS=Schistosoma mansoni GN=Smp_168730 PE=4 SV=1	4	32.185	-2.24333	19.5153	18.6103	19.6108	19.2455	21.5722	21.0756	21.8187	21.4888
G4VLY7	tr|G4VLY7|G4VLY7_SCHMA Putative camp-dependent protein kinase catalytic subunit OS=Schistosoma mansoni GN=Smp_164380 PE=3 SV=1	5	46.566	-0.111672	19.1696	18.2726	18.5529	18.665	18.8357	18.889	18.6055	18.7767
G4VLY9	tr|G4VLY9|G4VLY9_SCHMA Uncharacterized protein OS=Schistosoma mansoni GN=Smp_078240 PE=4 SV=1	6	108.87	0.342176	17.7777	17.6332		17.7055	17.1552	17.6411	17.2936	17.3633
G4VM00	tr|G4VM00|G4VM00_SCHMA Ethanolamine-phosphate cytidylyltransferase OS=Schistosoma mansoni GN=Smp_158130 PE=4 SV=1	9	46.852	0.224073	19.9342	20.1138	20.3202	20.1227	19.7167	20.0757	19.9035	19.8986
G4VM03	tr|G4VM03|G4VM03_SCHMA Putative reticulocalbin OS=Schistosoma mansoni GN=Smp_158150 PE=4 SV=1	8	39.39	6.22959	21.9235	22.0384	21.7686	21.9102		15.5105	15.8506	15.6806
G4VM11	tr|G4VM11|G4VM11_SCHMA Uncharacterized protein OS=Schistosoma mansoni GN=Smp_066590 PE=3 SV=1	2	9.6409	-0.3955	17.4125			17.4125	18.2682	18.2716	16.8843	17.808
G4VM15	tr|G4VM15|G4VM15_SCHMA Putative eukaryotic translation initiation factor 4b/4h OS=Schistosoma mansoni GN=Smp_079490 PE=4 SV=1	6	32.44	-0.345234	18.2391	19.269	19.1154	18.8745	19.4873	19.0491	19.1227	19.2197
G4VM16	tr|G4VM16|G4VM16_SCHMA Uncharacterized protein OS=Schistosoma mansoni GN=Smp_079480 PE=4 SV=1	4	22.191	-1.67444	21.3371	21.0591	20.173	20.8564	22.5085	22.7522	22.3318	22.5308
G4VM18	tr|G4VM18|G4VM18_SCHMA Subfamily M16B non-peptidase homologue (M16 family) OS=Schistosoma mansoni GN=Smp_079450 PE=4 SV=1	6	38.123	-0.335853	21.0124	19.9202	21.7536	20.8954	21.8612	20.9789	20.8537	21.2313
G4VM24;G4VM23	tr|G4VM24|G4VM24_SCHMA Methionine aminopeptidase OS=Schistosoma mansoni GN=Smp_142010.1 PE=3 SV=1;tr|G4VM23|G4VM23_SCHMA Methionine aminopeptidase OS=Schistosoma mansoni GN=Smp_142010.2 PE=3 SV=1	3	48.109	-0.546099	17.0705	16.583	18.3972	17.3502	17.9987	17.8165	17.8737	17.8963
G4VM32	tr|G4VM32|G4VM32_SCHMA Putative vacuolar sorting protein OS=Schistosoma mansoni GN=Smp_173330 PE=4 SV=1	11	119.2	-0.392313	18.5994	18.4845	18.2875	18.4571	18.8752	18.7724	18.9007	18.8494
G4VM36	tr|G4VM36|G4VM36_SCHMA Putative gamma-soluble nsf attachment protein (Snap) OS=Schistosoma mansoni GN=Smp_052740 PE=4 SV=1	8	40.435	0.454207	19.586	18.5825	18.8652	19.0112	18.7929	18.6731	18.205	18.557
G4VM45	tr|G4VM45|G4VM45_SCHMA Deoxyribose-phosphate aldolase OS=Schistosoma mansoni GN=Smp_141970 PE=4 SV=1	5	33.738	-0.570439	16.6651	17.592	17.8767	17.378	17.8191	17.8577	18.1683	17.9484
G4VM55	tr|G4VM55|G4VM55_SCHMA Putative neuronal calcium sensor OS=Schistosoma mansoni GN=Smp_068510 PE=4 SV=1	4	17.707	0.0355277	21.4118	21.117	20.6605	21.0631	21.3042	21.1234	20.6552	21.0276
G4VM57	tr|G4VM57|G4VM57_SCHMA Putative syntenin OS=Schistosoma mansoni GN=Smp_068530 PE=4 SV=1	6	32.239	0.636455	21.957	21.0179	22.0076	21.6608	21.2892	20.9689	20.815	21.0244
G4VM90	tr|G4VM90|G4VM90_SCHMA Casein kinase II subunit beta OS=Schistosoma mansoni GN=Smp_025010 PE=3 SV=1	4	25.009	-0.512452	19.9497	20.1853	18.9289	19.6879	20.2832	20.055	20.263	20.2004
G4VMA1	tr|G4VMA1|G4VMA1_SCHMA Putative eif-1a OS=Schistosoma mansoni GN=Smp_024880 PE=3 SV=1	1	21.334	-0.0264474	19.0209			19.0209	19.2846	19.1814	18.6759	19.0473
G4VMA3	tr|G4VMA3|G4VMA3_SCHMA Uncharacterized protein OS=Schistosoma mansoni GN=Smp_024870 PE=4 SV=1	13	34.8	2.69275	23.7819	23.9764	24.299	24.0191	21.3678	21.2126	21.3987	21.3264
G4VMC7	tr|G4VMC7|G4VMC7_SCHMA Uncharacterized protein OS=Schistosoma mansoni GN=Smp_176190 PE=4 SV=1	2	13.883	-0.0961788	19.3534	19.3502	17.7432	18.8156	19.1554	18.8404	18.7395	18.9118
G4VMD4	tr|G4VMD4|G4VMD4_SCHMA Putative adenylsulfate kinase OS=Schistosoma mansoni GN=Smp_154270 PE=3 SV=1	8	69.187	-0.243433	18.8613	18.7437	18.9463	18.8505	19.541	19.0084	18.7323	19.0939
G4VMD5	tr|G4VMD5|G4VMD5_SCHMA Uncharacterized protein OS=Schistosoma mansoni GN=Smp_059660 PE=4 SV=1	8	46.456	-0.379466	20.6447	21.7713	21.9174	21.4444	21.9348	22.0267	21.5103	21.8239
G4VMD6	tr|G4VMD6|G4VMD6_SCHMA Uncharacterized protein OS=Schistosoma mansoni GN=Smp_059670 PE=4 SV=1	3	26.06	0.322637	20.5294	20.8448	21.2715	20.8819	20.3127	20.6779	20.6872	20.5593
G4VME0	tr|G4VME0|G4VME0_SCHMA Uncharacterized protein OS=Schistosoma mansoni GN=Smp_059710 PE=4 SV=1	3	44.815	2.11507	18.6112	17.2695	19.1672	18.3493	17.3048		15.1637	16.2343
G4VMF9	tr|G4VMF9|G4VMF9_SCHMA Histone H2A OS=Schistosoma mansoni GN=Smp_210630 PE=3 SV=1	4	14.276	1.04811	26.2289	25.6897	25.829	25.9159	24.8699	24.7728	24.9606	24.8678
G4VMH2	tr|G4VMH2|G4VMH2_SCHMA Uncharacterized protein OS=Schistosoma mansoni GN=Smp_063180 PE=4 SV=1	6	59.202	-0.526647	17.4941	18.5249	18.3876	18.1356	18.7202	18.5369	18.7296	18.6622
G4VMH6	tr|G4VMH6|G4VMH6_SCHMA Inosine triphosphate pyrophosphatase OS=Schistosoma mansoni GN=Smp_063120.1 PE=3 SV=1	2	21.176	0.745842	16.9982	17.3743	19.3154	17.896	17.4491	16.8512		17.1501
G4VMH8;G4VMH7	tr|G4VMH8|G4VMH8_SCHMA Putative zinc finger protein OS=Schistosoma mansoni GN=Smp_063110.2 PE=4 SV=1;tr|G4VMH7|G4VMH7_SCHMA Putative zinc finger protein OS=Schistosoma mansoni GN=Smp_063110.1 PE=4 SV=1	5	86.266	1.26945	18.4894	18.3685	18.347	18.4016	17.835	17.6357	15.9259	17.1322
G4VMI0	tr|G4VMI0|G4VMI0_SCHMA Aconitate hydratase OS=Schistosoma mansoni GN=Smp_063090 PE=4 SV=1	19	65.76	-1.06284	23.594	23.3242	23.3236	23.4139	24.6259	24.3393	24.4652	24.4768
G4VMI7	tr|G4VMI7|G4VMI7_SCHMA Trafficking protein particle complex subunit OS=Schistosoma mansoni GN=Smp_149360 PE=3 SV=1	5	19.808	0.154551	21.0705	20.7602	20.5407	20.7905	20.7918	20.7754	20.3406	20.6359
G4VMI8	tr|G4VMI8|G4VMI8_SCHMA Uncharacterized protein OS=Schistosoma mansoni GN=Smp_050880 PE=4 SV=1	1	18.216	0.0860346	19.0474	18.3761	18.3567	18.5934	17.8701	19.357	18.2949	18.5074
G4VMI9	tr|G4VMI9|G4VMI9_SCHMA Uncharacterized protein OS=Schistosoma mansoni GN=Smp_050890 PE=4 SV=1	6	107.73	-0.950606	15.816	16.6593	15.8155	16.0969	17.5058	16.5473	17.0896	17.0476
G4VMJ5;G4VMJ4	tr|G4VMJ5|G4VMJ5_SCHMA Putative 60s ribosomal protein L11 OS=Schistosoma mansoni GN=Smp_050940.1 PE=3 SV=1;tr|G4VMJ4|G4VMJ4_SCHMA Putative 60s ribosomal protein L11 OS=Schistosoma mansoni GN=Smp_050940.2 PE=3 SV=1	3	20.707	-0.169938	22.6743	22.1385	21.7401	22.1843	22.4074	22.3976	22.2577	22.3543
G4VMJ8	tr|G4VMJ8|G4VMJ8_SCHMA Serine/threonine kinase OS=Schistosoma mansoni GN=Smp_155720 PE=4 SV=1	7	64.831	-0.500824	17.3513	17.9377	18.1952	17.8281	18.4897	18.1105	18.3865	18.3289
G4VMK3	tr|G4VMK3|G4VMK3_SCHMA Uncharacterized protein OS=Schistosoma mansoni GN=Smp_130260 PE=4 SV=1	4	76.349	0.581495	16.5573	15.9072	16.5803	16.3482	15.6567	15.6153	16.0282	15.7667
G4VMK4	tr|G4VMK4|G4VMK4_SCHMA Putative thioredoxin-like protein OS=Schistosoma mansoni GN=Smp_175610.1 PE=4 SV=1	4	34.209	-0.177472	19.6985	20.1309	20.2787	20.036	20.2261	20.0363	20.3781	20.2135
G4VMK5	tr|G4VMK5|G4VMK5_SCHMA Uncharacterized protein OS=Schistosoma mansoni GN=Smp_097320 PE=4 SV=1	3	30.314	0.100734	21.0213	20.822	20.7551	20.8661	21.0347	20.6114	20.65	20.7654
G4VMK6	tr|G4VMK6|G4VMK6_SCHMA Putative rhoptry protein OS=Schistosoma mansoni GN=Smp_175620 PE=4 SV=1	2	131.05	0.155813	15.0071	15.54	16.2735	15.6069	14.1041	16.798		15.451
G4VML1	tr|G4VML1|G4VML1_SCHMA Fructose-1,6-bisphosphatase-related OS=Schistosoma mansoni GN=Smp_097370 PE=3 SV=1	4	37.471	0.0550717	19.3311	19.2101	19.1647	19.2353	19.2112	19.0291	19.3003	19.1802
G4VML2	tr|G4VML2|G4VML2_SCHMA Putative groes chaperonin OS=Schistosoma mansoni GN=Smp_097380 PE=3 SV=1	10	11.362	-0.690603	26.1953	25.7313	25.19	25.7055	26.4733	26.4837	26.2314	26.3961
G4VML6	tr|G4VML6|G4VML6_SCHMA Secretory carrier-associated membrane protein OS=Schistosoma mansoni GN=Smp_127650 PE=3 SV=1	3	28.439	0.819716	20.4614	20.4047	20.8855	20.5839	19.6208	20.025	19.6466	19.7641
G4VMM7	tr|G4VMM7|G4VMM7_SCHMA Putative atp-citrate synthase OS=Schistosoma mansoni GN=Smp_127730 PE=4 SV=1	3	73.493	-1.40329	16.0722	16.1779	14.4744	15.5748	17.3874	16.5386	17.0083	16.9781
G4VMN2	tr|G4VMN2|G4VMN2_SCHMA Uncharacterized protein OS=Schistosoma mansoni GN=Smp_010550 PE=4 SV=1	1	19.569	-3.88842	17.5599	16.7222	17.9454	17.4091	21.2211	21.6195	21.0521	21.2976
G4VMN3	tr|G4VMN3|G4VMN3_SCHMA Uncharacterized protein OS=Schistosoma mansoni GN=Smp_127780 PE=4 SV=1	9	172.79	1.2193	18.3674	18.0489	18.4884	18.3016	18.3899	16.4112	16.4457	17.0823
G4VMN6	tr|G4VMN6|G4VMN6_SCHMA Uncharacterized protein OS=Schistosoma mansoni GN=Smp_010620.1 PE=4 SV=1	5	21.799	-1.85729	19.5344	20.4149	20.0518	20.0003	21.9101	22.0263	21.6364	21.8576
G4VMN7	tr|G4VMN7|G4VMN7_SCHMA Uncharacterized protein OS=Schistosoma mansoni GN=Smp_127810 PE=4 SV=1	5	194.86	-0.318851	17.3048	16.7912	16.9507	17.0156	17.6027	16.7985	17.6021	17.3344
G4VMN8	tr|G4VMN8|G4VMN8_SCHMA Putative 60s ribosomal protein L6 (Fragment) OS=Schistosoma mansoni GN=Smp_010660 PE=4 SV=1	2	11.452	-0.514788	18.288	18.4738	20.0881	18.9499	19.9408	18.221	20.2324	19.4647
G4VMN9	tr|G4VMN9|G4VMN9_SCHMA Putative abnormal long morphology protein 1 (Sp8) OS=Schistosoma mansoni GN=Smp_010670 PE=4 SV=1	2	122.02	-0.197071	16.4187	15.6417	15.3367	15.799	16.8503	15.7475	15.3905	15.9961
G4VMP0	tr|G4VMP0|G4VMP0_SCHMA Uncharacterized protein OS=Schistosoma mansoni GN=Smp_127820 PE=4 SV=1	27	105.56	1.62972	21.9316	22.0249	22.059	22.0052	20.4517	20.4777	20.1969	20.3755
G4VMP1	tr|G4VMP1|G4VMP1_SCHMA Arp2/3 complex 34 kDa subunit OS=Schistosoma mansoni GN=Smp_010690 PE=3 SV=1	10	37.726	0.17963	20.7276	20.3878	20.7453	20.6202	20.1171	20.6619	20.5429	20.4406
G4VMP2	tr|G4VMP2|G4VMP2_SCHMA Arp2/3 complex 34 kDa subunit OS=Schistosoma mansoni GN=Smp_127830 PE=3 SV=1	4	31.612	-1.42033	16.5205	16.2854	16.7676	16.5245	16.3759	20.6592	16.7993	17.9448
G4VMP3	tr|G4VMP3|G4VMP3_SCHMA NADH dehydrogenase [ubiquinone] flavoprotein 1, mitochondrial OS=Schistosoma mansoni GN=Smp_010710 PE=3 SV=1	13	45.435	-0.584248	20.72	20.2449	21.2074	20.7241	21.2487	21.2074	21.4689	21.3083
G4VMP5	tr|G4VMP5|G4VMP5_SCHMA Dipeptidyl-peptidase 9 (S09 family) OS=Schistosoma mansoni GN=Smp_127840 PE=4 SV=1	5	111.78	1.53411	13.9959	17.0607	14.9678	15.3415	14.4011		13.2136	13.8074
G4VMR3	tr|G4VMR3|G4VMR3_SCHMA Anion exchange protein OS=Schistosoma mansoni GN=Smp_127940 PE=3 SV=1	18	153.85	-0.450418	18.8965	18.9975	19.8029	19.2323	19.8481	19.4107	19.7895	19.6828
G4VMR5	tr|G4VMR5|G4VMR5_SCHMA Uncharacterized protein OS=Schistosoma mansoni GN=Smp_211290 PE=3 SV=1	3	58.856	-0.813609	16.3711	16.4472	17.8345	16.8843	17.6676	17.8768	17.5493	17.6979
G4VMR7	tr|G4VMR7|G4VMR7_SCHMA Putative heat shock protein 70 (Hsp70)-interacting protein OS=Schistosoma mansoni GN=Smp_010930 PE=4 SV=1	22	79.222	-0.743821	21.3819	21.597	21.118	21.3656	22.0235	21.9775	22.3274	22.1095
G4VMR8;G4VMR9;Q86QS6	tr|G4VMR8|G4VMR8_SCHMA Acidic leucine-rich nuclear phosphoprotein 32-related protein (ANP32/acidic nuclear phosphoprotein-like protein) OS=Schistosoma mansoni GN=Smp_010940.4 PE=4 SV=1;tr|G4VMR9|G4VMR9_SCHMA Acidic leucine-rich nuclear phosphoprotein 32-re	5	27.882	0.962629	22.7159	22.4554	22.2979	22.4898	21.2428	21.6545	21.6841	21.5271
G4VMU2;A0A075FFK0	tr|G4VMU2|G4VMU2_SCHMA Putative frizzled OS=Schistosoma mansoni GN=Smp_118970 PE=3 SV=1;tr|A0A075FFK0|A0A075FFK0_SCHMA Frizzled-like protein OS=Schistosoma mansoni GN=Fz1 PE=2 SV=1	1	48.28	0.243448	16.9381	16.4306	17.0193	16.796			16.5526	16.5526
G4VMU5	tr|G4VMU5|G4VMU5_SCHMA Uncharacterized protein Smp_203280 OS=Schistosoma mansoni GN=Smp_203280 PE=4 SV=1	1	13.646	-0.609035	19.3332	19.5094	18.4225	19.0884	19.8288	19.6139	19.6495	19.6974
G4VMV1	tr|G4VMV1|G4VMV1_SCHMA Subfamily S9B unassigned peptidase (S09 family) OS=Schistosoma mansoni GN=Smp_057530 PE=4 SV=1	2	103.12	-0.508681	15.8823	13.3582	14.9628	14.7344			15.2431	15.2431
G4VMV6	tr|G4VMV6|G4VMV6_SCHMA Uncharacterized protein OS=Schistosoma mansoni GN=Smp_153000 PE=4 SV=1	2	101.85	0.969444	17.3513	17.4768	18.6179	17.8153	17.3162	17.116	16.1055	16.8459
G4VMW2	tr|G4VMW2|G4VMW2_SCHMA Uncharacterized protein OS=Schistosoma mansoni GN=Smp_152960 PE=4 SV=1	3	31.797	F only	20.2262	20.117	19.8268	20.0566				N/A
G4VMW3	tr|G4VMW3|G4VMW3_SCHMA Uncharacterized protein OS=Schistosoma mansoni GN=Smp_057410 PE=4 SV=1	3	47.469	F only	18.1673	18.2099	18.3322	18.2365				N/A
G4VMW9	tr|G4VMW9|G4VMW9_SCHMA Putative vesicular-fusion protein nsf OS=Schistosoma mansoni GN=Smp_057320 PE=4 SV=1	27	81.789	-0.00457575	21.6252	21.0857	21.9602	21.557	21.8697	21.1735	21.6415	21.5616
G4VMX3	tr|G4VMX3|G4VMX3_SCHMA Putative tetraspanin-CD63 receptor OS=Schistosoma mansoni GN=Smp_140000 PE=3 SV=1	4	30.582	-0.697873	20.8212	20.0684	20.4085	20.4327	20.7982	21.3128	21.2808	21.1306
G4VMZ5	tr|G4VMZ5|G4VMZ5_SCHMA Isoleucine--tRNA ligase OS=Schistosoma mansoni GN=Smp_041600 PE=3 SV=1	12	144.24	-0.800434	16.512	16.6275	16.5636	16.5677	17.8369	17.1749	17.0926	17.3681
G4VMZ6	tr|G4VMZ6|G4VMZ6_SCHMA Putative thioredoxin-like protein OS=Schistosoma mansoni GN=Smp_144840 PE=4 SV=1	6	26.26	-0.588162	20.875	20.8782	20.6788	20.8106	21.2209	21.3702	21.6054	21.3988
G4VN05	tr|G4VN05|G4VN05_SCHMA Putative isocitric dehydrogenase subunit alpha OS=Schistosoma mansoni GN=Smp_196160 PE=4 SV=1	10	31.883	-0.732927	23.2318	22.8934	23.1035	23.0762	23.6777	23.8019	23.9478	23.8091
G4VN07	tr|G4VN07|G4VN07_SCHMA Uncharacterized protein (Fragment) OS=Schistosoma mansoni GN=Smp_134570 PE=4 SV=1	4	219.3	-0.389831	15.2465	14.6863	13.8847	14.6058	15.4814	14.3097	15.1959	14.9957
G4VN13	tr|G4VN13|G4VN13_SCHMA Uncharacterized protein OS=Schistosoma mansoni GN=Smp_134510 PE=4 SV=1	2	13.788	-0.481381	20.7312	20.4572	20.5095	20.566	21.0113	21.4495	20.6812	21.0474
G4VN15	tr|G4VN15|G4VN15_SCHMA Putative voltage-dependent anion-selective channel OS=Schistosoma mansoni GN=Smp_022990 PE=4 SV=1	14	31.926	-0.60179	21.7149	21.5621	21.8446	21.7072	22.4122	22.1358	22.379	22.309
G4VN20	tr|G4VN20|G4VN20_SCHMA Putative aldehyde dehydrogenase OS=Schistosoma mansoni GN=Smp_022960 PE=3 SV=1	17	57.333	-0.605153	21.4209	20.7132	21.4241	21.186	21.9532	21.4011	22.0192	21.7912
G4VN25	tr|G4VN25|G4VN25_SCHMA Putative sorting and assembly machinery (Sam50) protein OS=Schistosoma mansoni GN=Smp_166680 PE=4 SV=1	5	53.316	-0.776943	17.8964	18.1527	18.9568	18.3353	19.6485	18.575	19.1132	19.1123
G4VN39	tr|G4VN39|G4VN39_SCHMA Putative signal transducing adapter molecule (Stam) OS=Schistosoma mansoni GN=Smp_126520 PE=4 SV=1	6	64.001	0.233165	19.2796	18.8129	19.0797	19.0574	19.239	18.5864	18.6472	18.8242
G4VN40	tr|G4VN40|G4VN40_SCHMA Uncharacterized protein OS=Schistosoma mansoni GN=Smp_126510 PE=4 SV=1	12	37.654	0.519342	22.3825	22.2407	22.1353	22.2528	21.9601	21.7122	21.5283	21.7335
G4VN41	tr|G4VN41|G4VN41_SCHMA Putative tensin OS=Schistosoma mansoni GN=Smp_126500 PE=4 SV=1	17	102.02	0.257875	21.0832	20.9216	20.5338	20.8462	20.6794	20.4674	20.6182	20.5883
G4VN42	tr|G4VN42|G4VN42_SCHMA Lon protease homolog OS=Schistosoma mansoni GN=Smp_126490 PE=3 SV=1	22	115.88	-0.801377	20.2037	20.7506	19.9699	20.3081	21.2102	21.0736	21.0445	21.1094
G4VN43	tr|G4VN43|G4VN43_SCHMA Putative calponin/transgelin OS=Schistosoma mansoni GN=Smp_126480 PE=4 SV=1	9	21.881	-0.00831644	25.4142	25.3513	25.6161	25.4605	25.3775	25.5809	25.4481	25.4688
G4VN50	tr|G4VN50|G4VN50_SCHMA Uncharacterized protein OS=Schistosoma mansoni GN=Smp_078090.1 PE=4 SV=1	3	32.097	0.539629	19.1598	20.2807	20.1231	19.8546	19.408	18.741	19.7957	19.3149
G4VN56	tr|G4VN56|G4VN56_SCHMA Putative rab OS=Schistosoma mansoni GN=Smp_139340 PE=4 SV=1	7	42.407	1.43782	20.9198	20.804	20.7522	20.8253	19.7425	19.1095	19.3105	19.3875
G4VN60	tr|G4VN60|G4VN60_SCHMA Putative nadh-ubiquinone oxidoreductase 42 kD subunit OS=Schistosoma mansoni GN=Smp_031710 PE=4 SV=1	9	49.434	-0.308459	21.148	20.8276	20.7543	20.91	21.0628	21.1248	21.4676	21.2184
G4VN61	tr|G4VN61|G4VN61_SCHMA Histone H2A OS=Schistosoma mansoni GN=Smp_031720 PE=3 SV=1	7	16.512	0.886026	23.6845	23.2723	23.1606	23.3725	22.5227	22.4696	22.4671	22.4865
G4VN62	tr|G4VN62|G4VN62_SCHMA Signal peptidase complex catalytic subunit SEC11 OS=Schistosoma mansoni GN=Smp_031730 PE=3 SV=1	4	20.882	-0.577946	20.845	20.9003	20.3457	20.697	21.2434	21.2174	21.364	21.2749
G4VN71	tr|G4VN71|G4VN71_SCHMA Putative tropomyosin OS=Schistosoma mansoni GN=Smp_031770.2 PE=4 SV=1	2	32.985	0.078348	18.4455	17.6387	18.2344	18.1062	17.8197	18.4283	17.8356	18.0279
G4VN72	tr|G4VN72|G4VN72_SCHMA Putative tropomyosin OS=Schistosoma mansoni GN=Smp_031770.14 PE=4 SV=1	1	32.548	-0.301514	18.6352	17.7662	17.6766	18.026	18.5203	18.7248	17.7375	18.3275
G4VN73;G4VN66;G4VN65	tr|G4VN73|G4VN73_SCHMA Putative tropomyosin OS=Schistosoma mansoni GN=Smp_031770.9 PE=4 SV=1;tr|G4VN66|G4VN66_SCHMA Putative tropomyosin OS=Schistosoma mansoni GN=Smp_031770.15 PE=4 SV=1;tr|G4VN65|G4VN65_SCHMA Putative tropomyosin OS=Schistosoma mansoni GN	31	32.59	-0.126527	26.3603	25.7929	26.2729	26.142	25.8963	26.4757	26.4336	26.2685
G4VN84	tr|G4VN84|G4VN84_SCHMA Coatomer subunit delta (Fragment) OS=Schistosoma mansoni GN=Smp_031860 PE=3 SV=1	4	34.241	0.154072	20.2717	20.3096	20.1871	20.2561	20.1825	20.2193	19.9043	20.102
G4VN86	tr|G4VN86|G4VN86_SCHMA Ceramidase OS=Schistosoma mansoni GN=Smp_147460 PE=4 SV=1	5	67.083	-0.443946	17.7995	16.1489	17.7953	17.2479	16.9464	17.9216	18.2075	17.6918
G4VN92	tr|G4VN92|G4VN92_SCHMA Putative glutamate receptor, kainate OS=Schistosoma mansoni GN=Smp_147430 PE=3 SV=1	2	79.57	-0.314376	14.2638	14.7052	14.7597	14.5762	14.9353	14.1934	15.543	14.8906
G4VNA0	tr|G4VNA0|G4VNA0_SCHMA Uncharacterized protein OS=Schistosoma mansoni GN=Smp_047060 PE=3 SV=1	9	17.724	-0.859888	20.6747	21.1342	20.5422	20.7837	21.5988	21.7825	21.5495	21.6436
G4VNA5	tr|G4VNA5|G4VNA5_SCHMA Putative p53 regulated pa26 nuclear protein sestrin OS=Schistosoma mansoni GN=Smp_147400 PE=4 SV=1	3	71.012	-1.07926	17.9341	17.5861	17.6048	17.7084	18.9155	18.5322	18.9151	18.7876
G4VNB4	tr|G4VNB4|G4VNB4_SCHMA Ceramidase OS=Schistosoma mansoni GN=Smp_196110 PE=4 SV=1	6	44.747	0.0643863	21.3927	21.6924	21.5265	21.5372	21.4468	21.267	21.7047	21.4728
G4VNB5	tr|G4VNB5|G4VNB5_SCHMA Putative leucine-rich transmembrane proteins OS=Schistosoma mansoni GN=Smp_147470 PE=4 SV=1	11	49.668	0.566794	21.7724	22.0631	22.2755	22.037	21.5206	21.8323	21.0577	21.4702
G4VNC8	tr|G4VNC8|G4VNC8_SCHMA Uncharacterized protein OS=Schistosoma mansoni GN=Smp_158300 PE=4 SV=1	3	96.926	-0.76716	15.9093	14.228	14.371	14.8361	16.8787	14.1535	15.7776	15.6033
G4VND1;G4VND2;G4VND0	tr|G4VND1|G4VND1_SCHMA Putative merlin/moesin/ezrin/radixin OS=Schistosoma mansoni GN=Smp_066760.2 PE=4 SV=1;tr|G4VND2|G4VND2_SCHMA Putative merlin/moesin/ezrin/radixin OS=Schistosoma mansoni GN=Smp_066760.1 PE=4 SV=1;tr|G4VND0|G4VND0_SCHMA Putative merlin	26	63.651	0.45661	23.1045	22.8932	23.1373	23.045	22.6859	22.6361	22.4432	22.5884
G4VND5	tr|G4VND5|G4VND5_SCHMA Putative translation initiation inhibitor OS=Schistosoma mansoni GN=Smp_151690 PE=4 SV=1	4	14.163	-0.813399	21.6881	21.4007	21.5982	21.5623	22.5596	22.4719	22.0957	22.3757
G4VND7	tr|G4VND7|G4VND7_SCHMA Uncharacterized protein OS=Schistosoma mansoni GN=Smp_210910 PE=4 SV=1	2	15.271	-0.920369	18.4947	16.7712	17.1492	17.4717	18.7801	17.75	18.6461	18.3921
G4VNE5;G4VNE6	tr|G4VNE5|G4VNE5_SCHMA Putative adenylate kinase 1 OS=Schistosoma mansoni GN=Smp_061940.1 PE=3 SV=1;tr|G4VNE6|G4VNE6_SCHMA Putative adenylate kinase 1 OS=Schistosoma mansoni GN=Smp_061940.2 PE=3 SV=1	14	27.232	-1.18493	24.3889	23.9917	23.925	24.1019	25.1821	25.3007	25.3777	25.2868
G4VNE9;A9CBJ4	tr|G4VNE9|G4VNE9_SCHMA Putative uv excision repair protein rad23 OS=Schistosoma mansoni GN=Smp_061920.2 PE=4 SV=1;tr|A9CBJ4|A9CBJ4_SCHMA DNA repair protein OS=Schistosoma mansoni GN=Rad23 PE=2 SV=1	9	37.355	-1.31138	21.0671	21.4159	22.0088	21.4973	22.8495	22.9127	22.6639	22.8087
G4VNF8	tr|G4VNF8|G4VNF8_SCHMA Putative synaptotagmin 1,2 OS=Schistosoma mansoni GN=Smp_175900 PE=4 SV=1	8	42.472	-0.0215805	20.8479	20.7034	20.3665	20.6393	20.8441	20.3176	20.821	20.6609
G4VNG5	tr|G4VNG5|G4VNG5_SCHMA Uncharacterized protein OS=Schistosoma mansoni GN=Smp_021600 PE=4 SV=1	3	37.511	0.301696	19.4315	19.4825	20.601	19.8383	18.9857	20.1986	19.4256	19.5366
G4VNG9	tr|G4VNG9|G4VNG9_SCHMA Uncharacterized protein OS=Schistosoma mansoni GN=Smp_133850 PE=4 SV=1	1	20.376	-0.18627	17.2652	17.3385	17.4855	17.3631	17.8286	17.6268	17.1926	17.5494
G4VNH9	tr|G4VNH9|G4VNH9_SCHMA Putative splicing factor OS=Schistosoma mansoni GN=Smp_064590.1 PE=4 SV=1	1	52.256	M only				N/A	15.9402	16.827	16.2852	16.3508
G4VNI0	tr|G4VNI0|G4VNI0_SCHMA Cytochrome b-c1 complex subunit Rieske, mitochondrial OS=Schistosoma mansoni GN=Smp_061870 PE=4 SV=1	8	29.887	-0.481069	22.7604	22.5545	22.4512	22.5887	23.0053	23.0968	23.1072	23.0698
G4VNI6	tr|G4VNI6|G4VNI6_SCHMA Uncharacterized protein OS=Schistosoma mansoni GN=Smp_155410 PE=4 SV=1	3	47.945	M only				N/A	16.1454	15.1909	15.9172	15.7512
G4VNJ2	tr|G4VNJ2|G4VNJ2_SCHMA Putative four and A half lim domains OS=Schistosoma mansoni GN=Smp_143130.1 PE=4 SV=1	8	28.036	0.272162	22.206	22.4665	22.2215	22.298	22.3022	21.8318	21.9435	22.0258
G4VNK5	tr|G4VNK5|G4VNK5_SCHMA Uncharacterized protein OS=Schistosoma mansoni GN=Smp_182180 PE=4 SV=1	1	6.1642	0.546061			20.2754	20.2754	19.5865	19.9761	19.6255	19.7294
G4VNK9	tr|G4VNK9|G4VNK9_SCHMA Putative beta-tubulin cofactor d OS=Schistosoma mansoni GN=Smp_153590 PE=4 SV=1	3	121.48	-0.44698	17.295	16.5998	16.4938	16.7962	17.7846	16.8496	17.0953	17.2432
G4VNL4	tr|G4VNL4|G4VNL4_SCHMA Putative programmed cell death OS=Schistosoma mansoni GN=c8198_g8_i1 PE=4 SV=1	3	12.494	0.298344	21.4196	21.4885	21.0265	21.3115	20.9591	21.1295	20.9508	21.0132
G4VNL6	tr|G4VNL6|G4VNL6_SCHMA Putative nuclear autoantigenic sperm protein (Nasp) OS=Schistosoma mansoni GN=Smp_058320 PE=4 SV=1	5	47.376	-0.195228	18.8721	18.7954	17.9319	18.5331	18.7152	18.946	18.5238	18.7283
G4VNL7	tr|G4VNL7|G4VNL7_SCHMA Uncharacterized protein OS=Schistosoma mansoni GN=Smp_153550 PE=4 SV=1	6	15.658	0.184141	23.637	23.3381	23.2598	23.4116	22.9549	23.4496	23.278	23.2275
G4VNM5	tr|G4VNM5|G4VNM5_SCHMA Reticulon-like protein OS=Schistosoma mansoni GN=Smp_058240 PE=4 SV=1	6	21.98	0.43793	22.5572	22.1069	22.165	22.2764	22.1347	21.4898	21.8908	21.8384
G4VNN0	tr|G4VNN0|G4VNN0_SCHMA Putative monoxygenase OS=Schistosoma mansoni GN=Smp_153460 PE=4 SV=1	1	46.945	-0.934256	15.1522	15.9361	17.0288	16.039	17.3565	16.6577	16.9057	16.9733
G4VNN2;G4VNN1	tr|G4VNN2|G4VNN2_SCHMA Uncharacterized protein OS=Schistosoma mansoni GN=Smp_058170.2 PE=4 SV=1;tr|G4VNN1|G4VNN1_SCHMA Uncharacterized protein OS=Schistosoma mansoni GN=Smp_058170.1 PE=4 SV=1	7	89.986	-0.388598	16.5393		18.0186	17.279	18.7632	17.6828	16.5567	17.6676
G4VNP9	tr|G4VNP9|G4VNP9_SCHMA Putative phospholipase A-2-activating protein OS=Schistosoma mansoni GN=Smp_017750 PE=4 SV=1	6	94.014	0.64672	17.3775	19.7013	17.9003	18.3264	17.4674	17.8582	17.7133	17.6797
G4VNQ2	tr|G4VNQ2|G4VNQ2_SCHMA Uncharacterized protein OS=Schistosoma mansoni GN=Smp_131950 PE=4 SV=1	2	48.458	-0.854651		15.3877		15.3877	17.0349	15.3748	16.3175	16.2424
G4VNQ6;G4VNQ7;G4VNQ8	tr|G4VNQ6|G4VNQ6_SCHMA Uncharacterized protein OS=Schistosoma mansoni GN=Smp_017830.3 PE=4 SV=1;tr|G4VNQ7|G4VNQ7_SCHMA Uncharacterized protein OS=Schistosoma mansoni GN=Smp_017830.1 PE=4 SV=1;tr|G4VNQ8|G4VNQ8_SCHMA Uncharacterized protein OS=Schistosoma ma	3	12.703	-0.543904	21.813	21.0558	21.3208	21.3965	21.9115	21.9719	21.9379	21.9404
G4VNR5	tr|G4VNR5|G4VNR5_SCHMA Putative titin OS=Schistosoma mansoni GN=Smp_157010 PE=4 SV=1	57	288.27	-0.797552	19.5684	19.0024	19.6779	19.4162	20.5832	19.7879	20.2702	20.2138
G4VNR6	tr|G4VNR6|G4VNR6_SCHMA Myosin-binding protein-related OS=Schistosoma mansoni GN=Smp_108050 PE=4 SV=1	17	125.78	-0.635319	21.5163	21.0956	21.6587	21.4235	22.4072	21.6371	22.1323	22.0589
G4VNR9	tr|G4VNR9|G4VNR9_SCHMA Putative hemicentin OS=Schistosoma mansoni GN=Smp_157020 PE=4 SV=1	82	474.72	-1.09616	19.5051	19.136	19.5317	19.3909	20.7496	20.1731	20.5386	20.4871
G4VNS9	tr|G4VNS9|G4VNS9_SCHMA Putative ww domain-binding protein 2 (WBP-2) OS=Schistosoma mansoni GN=Smp_038210 PE=4 SV=1	3	34.563	0.299045	19.2355	19.7532	19.5305	19.5064	19.3492	18.9262	19.3467	19.2073
G4VNT0	tr|G4VNT0|G4VNT0_SCHMA Putative coatomer alpha subunit OS=Schistosoma mansoni GN=Smp_142910 PE=4 SV=1	10	81.449	0.142046	18.7161	19.1273	19.2563	19.0332	19.3712	17.9743	19.3281	18.8912
G4VNT1	tr|G4VNT1|G4VNT1_SCHMA Putative coatomer alpha subunit OS=Schistosoma mansoni GN=Smp_142920 PE=4 SV=1	12	61.467	0.0617679	19.4819	18.7827	19.8379	19.3675	19.6993	18.9383	19.2796	19.3057
G4VNT2	tr|G4VNT2|G4VNT2_SCHMA Putative alanyl-tRNA synthetase OS=Schistosoma mansoni GN=Smp_038240 PE=3 SV=1	14	109.69	0.253092	19.1818	19.6993	19.2629	19.3813	19.4833	18.7901	19.1113	19.1282
G4VNU1	tr|G4VNU1|G4VNU1_SCHMA Putative palmitoyl-protein thioesterase OS=Schistosoma mansoni GN=Smp_142970 PE=4 SV=1	3	34.113	0.43505	18.9217	18.9248	18.9577	18.9347	18.5533	18.6157	18.33	18.4997
G4VNU5	tr|G4VNU5|G4VNU5_SCHMA Non-specific serine/threonine protein kinase OS=Schistosoma mansoni GN=Smp_142990 PE=4 SV=1	9	92.624	0.12347	18.6958	18.1355	18.4403	18.4239	18.521	17.9352	18.445	18.3004
G4VNU8	tr|G4VNU8|G4VNU8_SCHMA Uncharacterized protein OS=Schistosoma mansoni GN=Smp_143020 PE=3 SV=1	3	80.395	-0.184542		16.1155		16.1155	14.9295	16.1698	17.8008	16.3
G4VNV0	tr|G4VNV0|G4VNV0_SCHMA Uncharacterized protein OS=Schistosoma mansoni GN=Smp_038420 PE=4 SV=1	2	30.123	-1.27404	17.1691	17.347	16.8219	17.1127	18.0451	18.1237	18.9914	18.3867
G4VNV9	tr|G4VNV9|G4VNV9_SCHMA Phosphodiesterase OS=Schistosoma mansoni GN=Smp_179590 PE=3 SV=1	10	111.85	0.322019	17.0724	17.4775	17.7405	17.4301	17.051	16.5308	17.7426	17.1081
G4VNW3	tr|G4VNW3|G4VNW3_SCHMA Uncharacterized protein OS=Schistosoma mansoni GN=Smp_153230 PE=4 SV=1	5	146.36	0.0229175	18.7127	18.6846	18.3013	18.5662	18.508	18.3418	18.7799	18.5433
G4VNX4	tr|G4VNX4|G4VNX4_SCHMA Glycerol-3-phosphate dehydrogenase [NAD(+)] OS=Schistosoma mansoni GN=Smp_169570 PE=3 SV=1	5	40.361	M only				N/A	18.4554	18.8099	18.4459	18.5704
G4VNY1	tr|G4VNY1|G4VNY1_SCHMA Clathrin light chain OS=Schistosoma mansoni GN=Smp_017880 PE=3 SV=1	5	21.625	0.258567	21.3819	20.9435	20.9225	21.0827	20.7454	20.943	20.7839	20.8241
G4VNZ5	tr|G4VNZ5|G4VNZ5_SCHMA Uncharacterized protein OS=Schistosoma mansoni GN=Smp_018020 PE=4 SV=1	5	22.826	-0.379878	21.1165	21.1011	20.6999	20.9725	21.191	21.5189	21.3473	21.3524
G4VP10	tr|G4VP10|G4VP10_SCHMA alpha-1,2-Mannosidase OS=Schistosoma mansoni GN=Smp_018150 PE=3 SV=1	3	65.912	0.66701	16.9639	17.1981	16.0063	16.7228	15.5182		16.5933	16.0558
G4VP31;G4VP32	tr|G4VP31|G4VP31_SCHMA Putative cytochrome b5 OS=Schistosoma mansoni GN=Smp_066010.2 PE=3 SV=1;tr|G4VP32|G4VP32_SCHMA Putative cytochrome b5 OS=Schistosoma mansoni GN=Smp_066010.1 PE=3 SV=1	8	14.69	-0.718333	22.6922	22.3039	22.2135	22.4032	23.0424	23.3176	23.0046	23.1215
G4VP35	tr|G4VP35|G4VP35_SCHMA Putative heat shock protein 70 (Hsp70)-interacting protein OS=Schistosoma mansoni GN=Smp_065980 PE=4 SV=1	9	39.061	0.415761	21.8381	21.4869	21.7827	21.7026	21.1564	21.5118	21.1922	21.2868
G4VP39	tr|G4VP39|G4VP39_SCHMA Rna-binding protein musashi-related OS=Schistosoma mansoni GN=Smp_157750 PE=4 SV=1	3	55.145	0.23147	18.9764	19.0092	19.0936	19.0264	18.8374	18.5343	19.0132	18.7949
G4VP42	tr|G4VP42|G4VP42_SCHMA Putative glycerol-3-phosphate dehydrogenase OS=Schistosoma mansoni GN=Smp_168310.1 PE=4 SV=1	3	21.512	-1.98149	18.4804	18.2337	18.4191	18.3777	20.2702	20.4225	20.385	20.3592
G4VP46	tr|G4VP46|G4VP46_SCHMA Proteasome catalytic subunit 3 (T01 family) OS=Schistosoma mansoni GN=Smp_164840 PE=4 SV=1	7	58.339	-0.185	19.7645	19.4741	19.2284	19.489	19.5719	19.7146	19.7355	19.674
G4VP51	tr|G4VP51|G4VP51_SCHMA Putative adp,ATP carrier protein OS=Schistosoma mansoni GN=Smp_079220 PE=3 SV=1	14	29.934	-1.37233	23.5061	22.499	23.528	23.1777	24.8983	23.8233	24.9284	24.55
G4VP58	tr|G4VP58|G4VP58_SCHMA Putative rab-interacting protein OS=Schistosoma mansoni GN=Smp_131900 PE=4 SV=1	2	18.254	0.55674	17.3091	19.1753	19.0166	18.5003	17.9195		17.9676	17.9436
G4VP59	tr|G4VP59|G4VP59_SCHMA Putative rab OS=Schistosoma mansoni GN=Smp_017710 PE=4 SV=1	3	35.157	0.429974	17.0481	17.4875	18.2643	17.6	17.1377	17.2003	17.172	17.17
G4VP60	tr|G4VP60|G4VP60_SCHMA Transporter OS=Schistosoma mansoni GN=Smp_131890 PE=3 SV=1	8	84.706	-0.174844	19.1049	19.5118	18.6711	19.0959	19.8999	18.9318	18.9806	19.2708
G4VP62;G4VP63	tr|G4VP62|G4VP62_SCHMA Putative carbonic anhydrase II (Carbonate dehydratase II) OS=Schistosoma mansoni GN=Smp_028670.1 PE=4 SV=1;tr|G4VP63|G4VP63_SCHMA Putative carbonic anhydrase II (Carbonate dehydratase II) OS=Schistosoma mansoni GN=Smp_028670.2 PE=4 S	6	28.703	-0.393771	21.1638	22.0149	21.7659	21.6482	21.8791	22.2259	22.0208	22.0419
G4VP70	tr|G4VP70|G4VP70_SCHMA Phosphatidylinositol-glycan biosynthesis class S protein OS=Schistosoma mansoni GN=Smp_196020 PE=4 SV=1	1	78.397	-0.949319		14.8534	15.2904	15.0719	15.443	16.5331	16.0875	16.0212
G4VP79	tr|G4VP79|G4VP79_SCHMA Eps-15-related OS=Schistosoma mansoni GN=Smp_171650 PE=4 SV=1	2	67.477	0.169674	15.6556	16.9516		16.3036	16.6425	15.9697	15.7894	16.1339
G4VP80	tr|G4VP80|G4VP80_SCHMA Uncharacterized protein OS=Schistosoma mansoni GN=Smp_171640 PE=4 SV=1	2	22.921	0.854668	16.5739	19.4045		17.9892	16.1608	17.1215	18.1214	17.1345
G4VP82	tr|G4VP82|G4VP82_SCHMA Purine nucleoside phosphorylase OS=Schistosoma mansoni GN=Smp_090520 PE=4 SV=1	1	44.983	1.03883	18.8045	18.4279	16.2947	17.8423			16.8035	16.8035
G4VP86	tr|G4VP86|G4VP86_SCHMA S-methyl-5-thioadenosine phosphorylase OS=Schistosoma mansoni GN=Smp_171620 PE=3 SV=1	16	32.905	-0.925937	22.0456	22.138	21.88	22.0212	22.901	23.0263	22.914	22.9471
G4VP92	tr|G4VP92|G4VP92_SCHMA Uncharacterized protein OS=Schistosoma mansoni GN=Smp_022540.1 PE=4 SV=1	9	30.589	-0.793467	22.5643	22.4899	22.0714	22.3752	23.028	23.2689	23.2091	23.1687
G4VP93	tr|G4VP93|G4VP93_SCHMA Putative geranylgeranyl pyrophosphate synthase OS=Schistosoma mansoni GN=Smp_134230 PE=3 SV=1	8	38.365	-1.97013	18.753	18.7144	19.1312	18.8662	20.7145	21.1593	20.6351	20.8363
G4VPA0	tr|G4VPA0|G4VPA0_SCHMA Iron-sulfur cluster scaffold protein nfu-related (Fragment) OS=Schistosoma mansoni GN=Smp_177790 PE=4 SV=1	2	17.318	-1.1403	18.2119	17.9088	17.9992	18.04	18.9292	19.1339	19.4778	19.1803
G4VPA5	tr|G4VPA5|G4VPA5_SCHMA Uncharacterized protein OS=Schistosoma mansoni GN=Smp_065890 PE=4 SV=1	5	28.534	0.507515	19.9257	19.3095	19.8415	19.6922	19.2258	19.051	19.2774	19.1847
G4VPA7	tr|G4VPA7|G4VPA7_SCHMA Phosphoacetylglucosamine mutase OS=Schistosoma mansoni GN=Smp_157710 PE=3 SV=1	9	71.671	1.01137	19.3246	19.2129	19.6071	19.3816	18.184	18.2505	18.6761	18.3702
G4VPB3	tr|G4VPB3|G4VPB3_SCHMA Uncharacterized protein OS=Schistosoma mansoni GN=Smp_157670 PE=4 SV=1	12	45.13	-0.169292	22.0891	22.2209	21.9676	22.0926	22.0897	22.5835	22.1123	22.2619
G4VPC4	tr|G4VPC4|G4VPC4_SCHMA Uncharacterized protein OS=Schistosoma mansoni GN=Smp_178360 PE=4 SV=1	4	76.293	-1.34943		16.5282	13.3142	14.9212	17.7562	13.9291	17.1266	16.2707
G4VPD0	tr|G4VPD0|G4VPD0_SCHMA Putative skd/vacuolar sorting OS=Schistosoma mansoni GN=Smp_025510 PE=3 SV=1	17	48.649	0.1731	21.6211	21.2981	21.7048	21.5413	21.366	21.3124	21.4263	21.3682
G4VPE6	tr|G4VPE6|G4VPE6_SCHMA Putative inorganic pyrophosphatase OS=Schistosoma mansoni GN=Smp_210870 PE=4 SV=1	5	74.791	1.04517	19.1464	18.4774	18.5345	18.7194	18.3965	16.6906	17.9357	17.6743
G4VPE7	tr|G4VPE7|G4VPE7_SCHMA Putative inorganic pyrophosphatase OS=Schistosoma mansoni GN=Smp_210880 PE=4 SV=1	9	73.149	0.602365	19.0803	18.4946	18.843	18.806	18.3652	17.9995	18.2462	18.2036
G4VPE8	tr|G4VPE8|G4VPE8_SCHMA Putative inorganic pyrophosphatase OS=Schistosoma mansoni GN=Smp_210890 PE=4 SV=1	13	37.606	0.935448	22.6945	22.5661	22.9449	22.7352	21.738	21.8516	21.8096	21.7997
G4VPF4	tr|G4VPF4|G4VPF4_SCHMA Putative prolyl-tRNA synthetase OS=Schistosoma mansoni GN=Smp_025260 PE=4 SV=1	1	53.42	M only				N/A	15.9021	15.0015	14.8828	15.2621
G4VPG5;G4VPG3;O18501	tr|G4VPG5|G4VPG5_SCHMA Putative acyl-protein thioesterase 1,2 (Lysophospholipase I,II) OS=Schistosoma mansoni GN=Smp_025160.1 PE=4 SV=1;tr|G4VPG3|G4VPG3_SCHMA Putative acyl-protein thioesterase 1,2 (Lysophospholipase I,II) OS=Schistosoma mansoni GN=Smp_025	5	24.38	0.15421	22.1989	21.826	21.6506	21.8918	21.7314	21.8501	21.6313	21.7376
G4VPG6	tr|G4VPG6|G4VPG6_SCHMA Sugar nucleotide epimerase related OS=Schistosoma mansoni GN=Smp_025150 PE=4 SV=1	4	25.834	-1.28762	20.3107	17.5722	20.4703	19.451	21.1677	20.2988	20.7496	20.7387
G4VPH0	tr|G4VPH0|G4VPH0_SCHMA U5 snrnp-specific protein-related OS=Schistosoma mansoni GN=Smp_025100 PE=4 SV=1	3	40.476	0.168271	17.5374	19.176	16.7266	17.8133	17.2443	17.6678	18.0231	17.6451
G4VPH5	tr|G4VPH5|G4VPH5_SCHMA Glucose-6-phosphate isomerase OS=Schistosoma mansoni GN=Smp_022400 PE=3 SV=1	24	61.085	-0.619785	24.3469	24.5607	24.409	24.4389	24.9085	25.1629	25.1045	25.0586
G4VPH8	tr|G4VPH8|G4VPH8_SCHMA Putative pdz and lim domain protein OS=Schistosoma mansoni GN=Smp_022340 PE=4 SV=1	11	35.555	-1.09861	22.1164	22.3476	22.3083	22.2574	23.4174	23.3971	23.2537	23.3561
G4VPH9	tr|G4VPH9|G4VPH9_SCHMA Putative dnaj homolog subfamily B member 2, 6, 8 OS=Schistosoma mansoni GN=Smp_022330 PE=4 SV=1	2	29.944	-0.802575	18.6037	18.5187	18.52	18.5475	19.1814	19.744	19.1246	19.35
G4VPI6	tr|G4VPI6|G4VPI6_SCHMA Phosphodiesterase OS=Schistosoma mansoni GN=Smp_134140 PE=3 SV=1	4	69.822	-0.499318	17.7154	17.311	17.8525	17.6263	18.5074	17.7496	18.1198	18.1256
G4VPK3	tr|G4VPK3|G4VPK3_SCHMA Putative liquid facets OS=Schistosoma mansoni GN=Smp_031100 PE=4 SV=1	6	67.08	-1.18753	18.1291	19.8352	18.5513	18.8385	19.8051	20.2425	20.0305	20.026
G4VPL6	tr|G4VPL6|G4VPL6_SCHMA 3bp-1 related rhogap OS=Schistosoma mansoni GN=Smp_139070 PE=4 SV=1	6	78.739	-0.0224007	18.2781	17.7749	17.0445	17.6992	17.4155	17.8235	17.9258	17.7216
G4VPM4	tr|G4VPM4|G4VPM4_SCHMA Uncharacterized protein OS=Schistosoma mansoni GN=Smp_139100.2 PE=4 SV=1	18	133.55	-0.614532	21.6932	21.8237	21.6273	21.7147	22.2837	22.2001	22.5041	22.3293
G4VPM5	tr|G4VPM5|G4VPM5_SCHMA Uncharacterized protein OS=Schistosoma mansoni GN=Smp_114540 PE=4 SV=1	5	14.937	-0.618488	23.0421	22.7816	22.2503	22.6913	23.2229	23.2566	23.4501	23.3098
G4VPM6	tr|G4VPM6|G4VPM6_SCHMA Putative universal stress protein OS=Schistosoma mansoni GN=Smp_031300 PE=4 SV=1	4	18.23	-0.914912	21.0413	19.881	20.7148	20.5457	21.6474	21.4515	21.2829	21.4606
G4VPM8	tr|G4VPM8|G4VPM8_SCHMA Putative ankyrin 2,3/unc44 OS=Schistosoma mansoni GN=Smp_198650 PE=4 SV=1	9	41.246	0.511308	22.0495	21.7526	21.8403	21.8808	21.5254	21.09	21.4931	21.3695
G4VPN8	tr|G4VPN8|G4VPN8_SCHMA Uncharacterized protein OS=Schistosoma mansoni GN=Smp_126170 PE=4 SV=1	4	83.377	-2.12908	14.4395	14.2098		14.3246	16.7135	16.2125	16.4352	16.4537
G4VPP3	tr|G4VPP3|G4VPP3_SCHMA Ubiquitin-activating enzyme E1-related OS=Schistosoma mansoni GN=Smp_045780 PE=4 SV=1	6	48.787	0.732397	19.4269	19.6368	19.9969	19.6869	18.4171	19.4317	19.0147	18.9545
G4VPP5	tr|G4VPP5|G4VPP5_SCHMA Putative atlastin OS=Schistosoma mansoni GN=Smp_146800 PE=4 SV=1	9	58.866	-0.0958003	21.0158	20.769	20.9133	20.8994	21.1312	20.7958	21.0585	20.9952
G4VPP6;G4VPP7	tr|G4VPP6|G4VPP6_SCHMA Delta-aminolevulinic acid dehydratase OS=Schistosoma mansoni GN=Smp_045810.2 PE=3 SV=1;tr|G4VPP7|G4VPP7_SCHMA Delta-aminolevulinic acid dehydratase OS=Schistosoma mansoni GN=Smp_045810.1 PE=3 SV=1	10	35.404	0.222642	20.3613	20.0874	20.2897	20.2461	19.8328	20.2459	19.9918	20.0235
G4VPQ8	tr|G4VPQ8|G4VPQ8_SCHMA Putative procollagen-lysine,2-oxoglutarate 5-dioxygenase OS=Schistosoma mansoni GN=Smp_045940 PE=4 SV=1	5	107.25	0.570721	17.5419	16.7973	17.0834	17.1409	16.2695	15.9687	17.4722	16.5701
G4VPQ9;G4VPR1;G4VPR0	tr|G4VPQ9|G4VPQ9_SCHMA Transformer-2-related OS=Schistosoma mansoni GN=Smp_045950.3 PE=4 SV=1;tr|G4VPR1|G4VPR1_SCHMA Transformer-2-related OS=Schistosoma mansoni GN=Smp_045950.1 PE=4 SV=1;tr|G4VPR0|G4VPR0_SCHMA Transformer-2-related OS=Schistosoma mansoni	2	20.052	-0.525246	17.0674	17.2286	17.7633	17.3531	18.5379	18.0542	17.0428	17.8783
G4VPR7;Q3ZFF6	tr|G4VPR7|G4VPR7_SCHMA Uncharacterized protein OS=Schistosoma mansoni GN=Smp_046020 PE=4 SV=1;tr|Q3ZFF6|Q3ZFF6_SCHMA Sds OS=Schistosoma mansoni PE=2 SV=1	11	37.957	0.290825	21.8137	21.5572	22.075	21.8153	20.9106	22.0119	21.6511	21.5245
G4VPS3;G4VPS2	tr|G4VPS3|G4VPS3_SCHMA Putative myosin-10 (Myosin heavy chain, nonmuscle IIb) (Nonmuscle myosin heavy chain IIb) (NMMHC II-b) (NMMHC-IIB) (Cellular myosin heavy chain, type B) (Nonmuscle myosin heavy chain-B) (NMMHC-B) OS=Schistosoma mansoni GN=Smp_046060.	82	230.4	-0.426545	21.6935	21.4046	21.743	21.6137	22.3451	21.5176	22.258	22.0402
G4VPS5;G4VPS6	tr|G4VPS5|G4VPS5_SCHMA Putative chaperonin containing t-complex protein 1, theta subunit, tcpq OS=Schistosoma mansoni GN=Smp_046090.2 PE=3 SV=1;tr|G4VPS6|G4VPS6_SCHMA Putative chaperonin containing t-complex protein 1, theta subunit, tcpq OS=Schistosoma ma	19	59.309	0.38981	22.194	20.8981	22.9904	22.0275	22.1496	20.8123	21.9513	21.6377
G4VPS8	tr|G4VPS8|G4VPS8_SCHMA Uncharacterized protein OS=Schistosoma mansoni GN=Smp_046100 PE=4 SV=1	2	14.28	-0.718084		21.1582	20.5059	20.8321	21.9161	21.578	21.1565	21.5502
G4VPS9	tr|G4VPS9|G4VPS9_SCHMA Putative choline o-acyltransferase OS=Schistosoma mansoni GN=Smp_146910 PE=3 SV=1	7	72.45	-0.187409	18.0841	16.7402	17.6738	17.4994	17.7723	18.1474	17.1406	17.6868
G4VPT2	tr|G4VPT2|G4VPT2_SCHMA Protein kinase OS=Schistosoma mansoni GN=Smp_046140 PE=4 SV=1	2	136.41	-0.120518	19.4102	19.1035	19.1547	19.2228	18.9809	19.8225	19.2267	19.3434
G4VPT3	tr|G4VPT3|G4VPT3_SCHMA Uncharacterized protein OS=Schistosoma mansoni GN=Smp_046160 PE=4 SV=1	2	21.908	-1.02799	18.1562	15.445	19.0782	17.5598	18.3145	18.7985	18.6503	18.5878
G4VPU6	tr|G4VPU6|G4VPU6_SCHMA Signal recognition particle subunit SRP68 OS=Schistosoma mansoni GN=Smp_157160 PE=3 SV=1	8	71.748	-0.21859	18.4761	18.5688	18.3376	18.4608	19.0979	18.0827	18.8576	18.6794
G4VPU8	tr|G4VPU8|G4VPU8_SCHMA Putative cytoplasmic dynein intermediate chain 2, (Dhic-2) OS=Schistosoma mansoni GN=Smp_064870 PE=4 SV=1	10	74.095	-0.360438	19.9948	19.8796	19.4117	19.762	20.2011	19.9817	20.1846	20.1225
G4VPU9	tr|G4VPU9|G4VPU9_SCHMA Putative heat shock protein 70 (Hsp70)-interacting protein OS=Schistosoma mansoni GN=Smp_064860 PE=4 SV=1	13	36.273	0.100101	23.7696	23.3512	23.9637	23.6948	23.4569	23.6997	23.6275	23.5947
G4VPX3	tr|G4VPX3|G4VPX3_SCHMA Uncharacterized protein OS=Schistosoma mansoni GN=Smp_126320 PE=4 SV=1	1	63.322	-0.67584	24.3514	25.1808	24.3498	24.6273	24.7256	25.5554	25.6286	25.3032
G4VPX8	tr|G4VPX8|G4VPX8_SCHMA Putative alanine aminotransferase OS=Schistosoma mansoni GN=Smp_007760 PE=4 SV=1	18	53.886	-0.403629	22.3729	22.3864	22.5571	22.4388	22.8621	23.0325	22.6326	22.8424
G4VPZ2	tr|G4VPZ2|G4VPZ2_SCHMA Uncharacterized protein OS=Schistosoma mansoni GN=Smp_007650 PE=4 SV=1	13	60.555	-0.953846	19.904	18.9808	20.1576	19.6808	21.1426	20.1891	20.5723	20.6346
G4VPZ3	tr|G4VPZ3|G4VPZ3_SCHMA Uncharacterized protein OS=Schistosoma mansoni GN=Smp_007640 PE=4 SV=1	25	110.79	-0.688144	20.6877	20.1123	20.656	20.4853	21.5292	20.8103	21.181	21.1735
G4VPZ5;G4VPZ4	tr|G4VPZ5|G4VPZ5_SCHMA Putative polyadenylate binding protein OS=Schistosoma mansoni GN=Smp_007630.2 PE=4 SV=1;tr|G4VPZ4|G4VPZ4_SCHMA Putative polyadenylate binding protein OS=Schistosoma mansoni GN=Smp_007630.1 PE=4 SV=1	3	24.399	-0.647139	19.1168	20.0853	19.4453	19.5491	20.1859	20.142	20.2609	20.1963
G4VPZ6	tr|G4VPZ6|G4VPZ6_SCHMA Serine/threonine-protein phosphatase OS=Schistosoma mansoni GN=Smp_126260 PE=3 SV=1	6	65.622	-0.89602	17.6155	17.6893	17.4198	17.5749	18.5484	18.4087	18.4556	18.4709
G4VPZ9;G4VQ00	tr|G4VPZ9|G4VPZ9_SCHMA Putative malic enzyme OS=Schistosoma mansoni GN=Smp_134440.2 PE=4 SV=1;tr|G4VQ00|G4VQ00_SCHMA Putative malic enzyme OS=Schistosoma mansoni GN=Smp_134440.1 PE=4 SV=1	14	57.346	-0.33723	18.8251	17.8602	19.5294	18.7382	19.2445	18.8348	19.1471	19.0754
G4VQ09	tr|G4VQ09|G4VQ09_SCHMA Arp2/3 complex subunit 41-related OS=Schistosoma mansoni GN=Smp_134400 PE=4 SV=1	7	24.663	-0.558179	21.0784	21.1508	21.3218	21.1837	21.9396	21.8046	21.4813	21.7419
G4VQ10	tr|G4VQ10|G4VQ10_SCHMA Arp2/3 complex subunit 41-related OS=Schistosoma mansoni GN=Smp_186700 PE=4 SV=1	4	21.931	-0.0841678	21.8038	21.6964	21.6413	21.7138	21.7779	21.941	21.6751	21.798
G4VQ12;G4VQ13	tr|G4VQ12|G4VQ12_SCHMA Putative rab-2,4,14 OS=Schistosoma mansoni GN=Smp_022810.1 PE=4 SV=1;tr|G4VQ13|G4VQ13_SCHMA Putative rab-2,4,14 OS=Schistosoma mansoni GN=Smp_022810.2 PE=4 SV=1	7	24.114	-0.589588	19.1122	19.7945	18.8991	19.2686	20.0073	19.5233	20.0439	19.8582
G4VQ30;G4VQ31	tr|G4VQ30|G4VQ30_SCHMA Putative pantothenate kinase OS=Schistosoma mansoni GN=Smp_064750.1 PE=4 SV=1;tr|G4VQ31|G4VQ31_SCHMA Putative pantothenate kinase OS=Schistosoma mansoni GN=Smp_064750.2 PE=4 SV=1	8	94.223	-1.4804	15.6821	16.7126	16.5014	16.2987	18.119	17.7365	17.4818	17.7791
G4VQ33	tr|G4VQ33|G4VQ33_SCHMA Cysteine-rich with egf-like domains protein OS=Schistosoma mansoni GN=Smp_157070 PE=4 SV=1	3	48.636	-0.194491		16.543	16.8799	16.7115	16.8966	16.9238	16.8975	16.906
G4VQ41	tr|G4VQ41|G4VQ41_SCHMA Low-density lipoprotein receptor (Ldl) OS=Schistosoma mansoni GN=Smp_159420 PE=4 SV=1	38	102.68	0.463516	23.3312	23.315	23.3545	23.3336	22.9474	22.6316	23.0311	22.87
G4VQ42	tr|G4VQ42|G4VQ42_SCHMA Low-density lipoprotein receptor (Ldl) OS=Schistosoma mansoni GN=Smp_179370 PE=4 SV=1	31	102.36	0.372289	22.4834	22.331	22.4069	22.4071	22.1863	21.8324	22.0858	22.0348
G4VQ62;G4VQ61;G4VQ63	tr|G4VQ62|G4VQ62_SCHMA Polyadenylate-binding protein OS=Schistosoma mansoni GN=Smp_024140.3 PE=3 SV=1;tr|G4VQ61|G4VQ61_SCHMA Polyadenylate-binding protein OS=Schistosoma mansoni GN=Smp_024140.4 PE=3 SV=1;tr|G4VQ63|G4VQ63_SCHMA Polyadenylate-binding protein	15	79.786	-0.531604	20.3091	20.737	20.23	20.4254	21.1396	20.9189	20.8124	20.957
G4VQ64	tr|G4VQ64|G4VQ64_SCHMA Putative ubx domain-containing OS=Schistosoma mansoni GN=Smp_024150 PE=4 SV=1	4	54.896	-1.44847	13.2835			13.2835	16.3255	12.5026	15.3677	14.7319
G4VQ74	tr|G4VQ74|G4VQ74_SCHMA Uncharacterized protein OS=Schistosoma mansoni GN=Smp_024220 PE=4 SV=1	19	85.116	-0.342615	20.6123	20.3026	20.641	20.5187	20.9402	20.6436	20.9999	20.8613
G4VQ77	tr|G4VQ77|G4VQ77_SCHMA Putative brefeldin A-inhibited guanine nucleotide-exchange protein OS=Schistosoma mansoni GN=Smp_135280 PE=4 SV=1	7	228.19	0.797117	14.9033		15.8604	15.3818	15.6398	13.2642	14.8502	14.5847
G4VQ88;G4VQ87	tr|G4VQ88|G4VQ88_SCHMA Translocase of inner mitochondrial membrane 50-related OS=Schistosoma mansoni GN=Smp_024360.2 PE=4 SV=1;tr|G4VQ87|G4VQ87_SCHMA Translocase of inner mitochondrial membrane 50-related OS=Schistosoma mansoni GN=Smp_024360.1 PE=4 SV=1	3	36.108	-0.164861	17.7424	18.1926	17.7054	17.8801	17.356	18.2727	18.5063	18.045
G4VQ90	tr|G4VQ90|G4VQ90_SCHMA Uncharacterized protein OS=Schistosoma mansoni GN=Smp_180680 PE=4 SV=1	2	129.58	1.05394	16.1243	18.8143	18.8677	17.9354	17.0118	16.8361	16.7966	16.8815
G4VQC1	tr|G4VQC1|G4VQC1_SCHMA Vacuolar protein sorting-associated protein 28 homolog OS=Schistosoma mansoni GN=Smp_067540 PE=3 SV=1	3	24.516	-0.0218848	17.8893	18.3414	17.3879	17.8729	18.1542	18.1617	17.3684	17.8948
G4VQD2;G4VQD3	tr|G4VQD2|G4VQD2_SCHMA Putative dnaj homolog subfamily B member 4 OS=Schistosoma mansoni GN=Smp_020920.1 PE=4 SV=1;tr|G4VQD3|G4VQD3_SCHMA Putative dnaj homolog subfamily B member 4 OS=Schistosoma mansoni GN=Smp_020920.2 PE=4 SV=1	16	37.533	-0.756701	22.7013	22.8928	22.3294	22.6412	23.4074	23.4141	23.372	23.3979
G4VQD9	tr|G4VQD9|G4VQD9_SCHMA Putative aldehyde dehydrogenase OS=Schistosoma mansoni GN=Smp_172730 PE=4 SV=1	9	42.106	-0.530288	20.4159	19.9735	20.4764	20.2886	20.803	20.5513	21.1024	20.8189
G4VQE3	tr|G4VQE3|G4VQE3_SCHMA Putative oxalate:formate antiporter OS=Schistosoma mansoni GN=Smp_135010 PE=4 SV=1	3	31.629	-0.480031	18.4297	17.0355	18.5524	18.0059	18.6118	18.641	18.2049	18.4859
G4VQG6;G4VQG8;G4VQG7	tr|G4VQG6|G4VQG6_SCHMA Putative microsomal signal peptidase 25 kD subunit OS=Schistosoma mansoni GN=Smp_024390.1 PE=4 SV=1;tr|G4VQG8|G4VQG8_SCHMA Putative microsomal signal peptidase 25 kD subunit OS=Schistosoma mansoni GN=Smp_024390.2 PE=4 SV=1;tr|G4VQG7|	2	18.006	-0.209929	20.1787	19.9935	18.6859	19.6193	19.8199	19.7056	19.9623	19.8293
G4VQH7	tr|G4VQH7|G4VQH7_SCHMA Putative microtubule-associated protein, rp/eb family OS=Schistosoma mansoni GN=Smp_054540 PE=4 SV=1	9	31.332	-0.241423	22.7385	22.7489	22.2857	22.5911	22.7663	22.9787	22.7524	22.8325
G4VQI1	tr|G4VQI1|G4VQI1_SCHMA Multidrug and toxin extrusion protein OS=Schistosoma mansoni GN=Smp_151290 PE=3 SV=1	1	81.486	-0.325946	16.5385	16.4454	16.5401	16.508	16.8284	17.0963	16.5772	16.8339
G4VQJ3	tr|G4VQJ3|G4VQJ3_SCHMA Putative adenine phosphoribosyltransferase OS=Schistosoma mansoni GN=Smp_054410 PE=3 SV=1	6	21.651	-0.5712	21.3824	21.3749	21.1014	21.2862	22.161	21.8905	21.5208	21.8574
G4VQJ4	tr|G4VQJ4|G4VQJ4_SCHMA Putative adenine phosphoribosyltransferase OS=Schistosoma mansoni GN=Smp_054360 PE=3 SV=1	3	20.602	0.524446	19.5734	19.6483	19.5045	19.5754	19.6429	18.9698	18.5401	19.0509
G4VQJ7	tr|G4VQJ7|G4VQJ7_SCHMA Band 4.1-like protein OS=Schistosoma mansoni GN=Smp_194810 PE=4 SV=1	9	42.569	1.22427	21.2213	20.8695	20.9686	21.0198	20.1186	19.3467	19.9213	19.7955
G4VQJ8	tr|G4VQJ8|G4VQJ8_SCHMA SPRY domain containing protein OS=Schistosoma mansoni GN=Smp_194800 PE=4 SV=1	13	69.487	1.56771	20.7978	20.5612	20.496	20.6183	18.9721	19.0334	19.1463	19.0506
G4VQK2;G4VQK1;G4VQK0	tr|G4VQK2|G4VQK2_SCHMA Putative chaperonin containing t-complex protein 1, beta subunit, tcpb OS=Schistosoma mansoni GN=Smp_054340.2 PE=3 SV=1;tr|G4VQK1|G4VQK1_SCHMA Putative chaperonin containing t-complex protein 1, beta subunit, tcpb OS=Schistosoma mans	30	57.023	-0.191912	23.8913	23.8994	23.9813	23.924	24.0327	24.1375	24.1776	24.1159
G4VQK4	tr|G4VQK4|G4VQK4_SCHMA Putative vesicle transport V-snare protein vti1a OS=Schistosoma mansoni GN=Smp_068480 PE=4 SV=1	1	24.179	-1.05819	15.3194		16.0183	15.6689	16.93	17.1284	16.1228	16.727
G4VQL3	tr|G4VQL3|G4VQL3_SCHMA Uncharacterized protein OS=Schistosoma mansoni GN=Smp_203810 PE=4 SV=1	1	15.074	-0.350597	20.7776	21.0926	20.8213	20.8972	21.4385	20.8794	21.4254	21.2478
G4VQN7	tr|G4VQN7|G4VQN7_SCHMA Uncharacterized protein OS=Schistosoma mansoni GN=Smp_203440 PE=4 SV=1	2	8.2969	-0.19366	24.6338	24.1053	24.2909	24.3433	24.7804	24.5594	24.2711	24.537
G4VQP3	tr|G4VQP3|G4VQP3_SCHMA Uncharacterized protein OS=Schistosoma mansoni GN=Smp_153750 PE=4 SV=1	3	12.742	-0.378988	20.2545	19.2133	20.0734	19.8471	20.728	19.6249	20.3252	20.2261
G4VQQ6	tr|G4VQQ6|G4VQQ6_SCHMA Gap associated protein-related OS=Schistosoma mansoni GN=Smp_006320.1 PE=4 SV=1	8	34.404	0.870214	21.1985	21.5017	21.62	21.4401	20.701	21.0226	19.9859	20.5698
G4VQR4	tr|G4VQR4|G4VQR4_SCHMA Uncharacterized protein OS=Schistosoma mansoni GN=Smp_006190 PE=3 SV=1	2	36.968	-0.0469208	16.1507	17.0315	16.4679	16.55	18.0588	15.862	15.8701	16.597
G4VQR9	tr|G4VQR9|G4VQR9_SCHMA Putative 60s ribosomal protein L30 OS=Schistosoma mansoni GN=Smp_044580 PE=3 SV=1	4	12.975	-0.257265	22.4016	21.6998	21.9053	22.0022	22.2143	22.4249	22.1393	22.2595
G4VQS0;G4VQS1	tr|G4VQS0|G4VQS0_SCHMA Putative zyxin/trip6 OS=Schistosoma mansoni GN=Smp_146200.1 PE=4 SV=1;tr|G4VQS1|G4VQS1_SCHMA Putative zyxin/trip6 OS=Schistosoma mansoni GN=Smp_146200.2 PE=4 SV=1	2	44.084	-0.680887	19.4721	19.995	19.5297	19.6656	20.3021	20.1195	20.6179	20.3465
G4VQS2	tr|G4VQS2|G4VQS2_SCHMA 40S ribosomal protein S21 OS=Schistosoma mansoni GN=Smp_146190 PE=3 SV=1	3	10	-0.949232	19.3566	19.0021	18.8066	19.0551	19.5613	21.1509	19.3008	20.0043
G4VQS4;G4VQS7;G4VQS5;G4VQS6;G4VQS8;G4VQS9;G4VQT0	tr|G4VQS4|G4VQS4_SCHMA Putative far upstream (Fuse) binding protein OS=Schistosoma mansoni GN=Smp_044550.2 PE=4 SV=1;tr|G4VQS7|G4VQS7_SCHMA Putative far upstream (Fuse) binding protein OS=Schistosoma mansoni GN=Smp_044550.4 PE=4 SV=1;tr|G4VQS5|G4VQS5_SCHMA	13	35.555	1.06041	23.2117	23.2549	23.0011	23.1559	22.0255	22.3464	21.9146	22.0955
G4VQT7;Q26546	tr|G4VQT7|G4VQT7_SCHMA Putative carbonyl reductase OS=Schistosoma mansoni GN=Smp_033540 PE=4 SV=1;tr|Q26546|Q26546_SCHMA Carbonyl reductase-like protein trans-spliced OS=Schistosoma mansoni PE=2 SV=1	16	30.619	0.205149	24.2909	24.4229	24.5182	24.4107	24.0827	24.3353	24.1985	24.2055
G4VQU7	tr|G4VQU7|G4VQU7_SCHMA Putative mitotic checkpoint protein bub3 OS=Schistosoma mansoni GN=Smp_045060 PE=4 SV=1	2	40.204	0.288747	16.9287	17.6047		17.2667	17.242	16.9472	16.7446	16.978
G4VQX5	tr|G4VQX5|G4VQX5_SCHMA Putative importin-beta 2 OS=Schistosoma mansoni GN=Smp_142770 PE=4 SV=1	4	98.188	0.889812	16.8549			16.8549	16.4396	15.0858	16.3698	15.9651
G4VQZ4	tr|G4VQZ4|G4VQZ4_SCHMA L-lactate dehydrogenase OS=Schistosoma mansoni GN=Smp_038960 PE=3 SV=1	1	35.918	1.07357	20.3126	19.3999	20.5961	20.1029	20.0232	17.7101	19.3546	19.0293
G4VQZ5	tr|G4VQZ5|G4VQZ5_SCHMA L-lactate dehydrogenase OS=Schistosoma mansoni GN=Smp_038950 PE=3 SV=1	20	35.962	0.257231	26.9197	26.3636	27.5286	26.9373	26.9884	26.4034	26.6484	26.6801
G4VR00	tr|G4VR00|G4VR00_SCHMA Serine/threonine kinase OS=Schistosoma mansoni GN=Smp_094190 PE=4 SV=1	1	64.05	0.0256809	15.7045		15.532	15.6182	16.0377	14.7744	15.9655	15.5926
G4VR11	tr|G4VR11|G4VR11_SCHMA Protein kinase OS=Schistosoma mansoni GN=Smp_099030 PE=3 SV=1	12	42.13	-0.328907	21.6689	22.0577	21.9697	21.8988	22.1204	22.2193	22.3434	22.2277
G4VR24	tr|G4VR24|G4VR24_SCHMA Putative 22.6kDa tegument-associated antigen OS=Schistosoma mansoni GN=SmTAL12 PE=2 SV=1	4	21.94	5.11711	20.9152	20.8876	20.8525	20.8851		15.768		15.768
G4VR25	tr|G4VR25|G4VR25_SCHMA Putative 22.6kDa tegument-associated antigen OS=Schistosoma mansoni GN=Smp_146460 PE=4 SV=1	6	21.374	F only	19.9048	19.7295	19.839	19.8245				N/A
G4VR30	tr|G4VR30|G4VR30_SCHMA Eupitrilysin (M16 family) OS=Schistosoma mansoni GN=Smp_146140 PE=4 SV=1	24	113.05	-1.99644	19.2595	19.5914	17.9962	18.949	20.9631	20.8826	20.9906	20.9455
G4VR32	tr|G4VR32|G4VR32_SCHMA S-(hydroxymethyl)glutathione dehydrogenase OS=Schistosoma mansoni GN=Smp_044440 PE=3 SV=1	5	41.076	-1.12068	18.8855	19.2602	19.4728	19.2062	20.4316	20.1402	20.4088	20.3269
G4VR44;G4VR45;G4VR46	tr|G4VR44|G4VR44_SCHMA Long-chain-fatty-acid--CoA ligase OS=Schistosoma mansoni GN=Smp_175090.3 PE=4 SV=1;tr|G4VR45|G4VR45_SCHMA Long-chain-fatty-acid--CoA ligase OS=Schistosoma mansoni GN=Smp_175090.2 PE=4 SV=1;tr|G4VR46|G4VR46_SCHMA Long-chain-fatty-acid	2	80.299	-0.131258		15.3855	16.115	15.7502	15.596	16.3578	15.6906	15.8815
G4VR48;G4VR47	tr|G4VR48|G4VR48_SCHMA Putative 116 kD U5 small nuclear ribonucleoprotein component OS=Schistosoma mansoni GN=Smp_096450.1 PE=4 SV=1;tr|G4VR47|G4VR47_SCHMA Putative 116 kD U5 small nuclear ribonucleoprotein component OS=Schistosoma mansoni GN=Smp_096450.2	8	110.84	-0.0958564	18.0813	18.0539	17.8741	18.0031	18.1315	18.034	18.1314	18.0989
G4VR71	tr|G4VR71|G4VR71_SCHMA Putative 40s ribosomal protein S19 OS=Schistosoma mansoni GN=Smp_174950 PE=4 SV=1	5	16.148	-0.159581	21.2605	21.093	21.012	21.1218	21.6224	21.036	21.1859	21.2814
G4VR74;G4VR73	tr|G4VR74|G4VR74_SCHMA Putative dual-specificity phosphatase OS=Schistosoma mansoni GN=Smp_059290.2 PE=4 SV=1;tr|G4VR73|G4VR73_SCHMA Putative dual-specificity phosphatase OS=Schistosoma mansoni GN=Smp_059290.1 PE=4 SV=1	7	16.895	-1.1808	20.3501	20.8991	20.3572	20.5354	21.6382	22.0061	21.5044	21.7162
G4VR75	tr|G4VR75|G4VR75_SCHMA Putative ankyrin 2,3/unc44 OS=Schistosoma mansoni GN=Smp_154020 PE=4 SV=1	34	259.88	-2.55229	17.5945	16.2296	17.2954	17.0398	19.8437	19.2974	19.6353	19.5921
G4VR76;Q06279	tr|G4VR76|G4VR76_SCHMA Uncharacterized protein OS=Schistosoma mansoni GN=Smp_154010 PE=4 SV=1;tr|Q06279|Q06279_SCHMA A.1.12/9 antigen (Fragment) OS=Schistosoma mansoni PE=2 SV=1	4	169.68	-1.17385	22.1004	22.2469	23.4811	22.6095	24.0249	23.5791	23.746	23.7833
G4VR86	tr|G4VR86|G4VR86_SCHMA Putative calmodulin-3 (CaM-3) OS=Schistosoma mansoni GN=Smp_139970 PE=4 SV=1	4	8.6059	-1.94127	20.5366	23.4301	21.5808	21.8492	24.1223	23.9774	23.2716	23.7904
G4VR95	tr|G4VR95|G4VR95_SCHMA Serine/threonine kinase OS=Schistosoma mansoni GN=Smp_096640 PE=4 SV=1	8	68.184	0.472064	18.7166	19.1884	19.0595	18.9882	18.3395	18.6043	18.6045	18.5161
G4VRA2	tr|G4VRA2|G4VRA2_SCHMA Putative solute carrier family 12, k-cl cotransporter OS=Schistosoma mansoni GN=Smp_167820 PE=4 SV=1	1	31.176	0.299313	18.9079	19.0987	18.7385	18.915	18.6517	18.4938	18.7016	18.6157
G4VRA3	tr|G4VRA3|G4VRA3_SCHMA Putative solute carrier family 12, electroneutral k-cl cotransporter OS=Schistosoma mansoni GN=Smp_198430 PE=4 SV=1	7	80.601	-1.17716	16.5199	18.4615	20.2172	18.3995	20.3754	18.208	20.1467	19.5767
G4VRA7;Q2VU46	tr|G4VRA7|G4VRA7_SCHMA Putative ubiquitin-conjugating enzyme E2 I OS=Schistosoma mansoni GN=Smp_103710 PE=3 SV=1;tr|Q2VU46|Q2VU46_SCHMA Ubc9 (Fragment) OS=Schistosoma mansoni PE=2 SV=1	5	19.032	0.329612	20.4342	21.0396	20.7793	20.751	20.4442	20.6539	20.1661	20.4214
G4VRB5	tr|G4VRB5|G4VRB5_SCHMA Putative ectonucleotide pyrophosphatase/phosphodiesterase OS=Schistosoma mansoni GN=Smp_104270 PE=4 SV=1	9	63.334	0.538868	20.4472	20.6962	20.318	20.4872	19.896	19.6846	20.2643	19.9483
G4VRC3;G4VRC2	tr|G4VRC3|G4VRC3_SCHMA Proteasome subunit beta 2 (T01 family) OS=Schistosoma mansoni GN=Smp_074500.2 PE=4 SV=1;tr|G4VRC2|G4VRC2_SCHMA Proteasome subunit beta 2 (T01 family) OS=Schistosoma mansoni GN=Smp_074500.1 PE=4 SV=1	4	22.82	1.13558	19.9508	19.7216	20.2176	19.9633	19.2207	18.3873	18.8752	18.8278
G4VRC7	tr|G4VRC7|G4VRC7_SCHMA Putative tegumental protein OS=Schistosoma mansoni GN=SmTAL10 PE=2 SV=1	4	21.433	2.75433	22.9693	22.7079	22.6306	22.7693	20.0365	19.8381	20.1702	20.0149
G4VRC9	tr|G4VRC9|G4VRC9_SCHMA Uncharacterized protein OS=Schistosoma mansoni GN=Smp_074450 PE=4 SV=1	8	21.801	0.611234	22.9445	21.9387	22.7495	22.5442	22.1827	21.9357	21.6807	21.933
G4VRD8;G4VRD9	tr|G4VRD8|G4VRD8_SCHMA Putative nadh-ubiquinone oxidoreductase 1, chain OS=Schistosoma mansoni GN=Smp_042590.2 PE=3 SV=1;tr|G4VRD9|G4VRD9_SCHMA Putative nadh-ubiquinone oxidoreductase 1, chain OS=Schistosoma mansoni GN=Smp_042590.1 PE=3 SV=1	3	19.149	-0.698928		18.7409		18.7409	19.6539	19.2385	19.4271	19.4399
G4VRE1	tr|G4VRE1|G4VRE1_SCHMA Putative mitochondrial import receptor subunit tom40 OS=Schistosoma mansoni GN=Smp_042560 PE=4 SV=1	6	35.232	-0.0878547	20.7505	20.8403	20.8334	20.8081	20.9963	20.4275	21.264	20.8959
G4VRE2	tr|G4VRE2|G4VRE2_SCHMA Sortingnexin-related OS=Schistosoma mansoni GN=Smp_042550 PE=4 SV=1	12	49.438	-0.044386	21.0337	21.14	20.9726	21.0488	20.9751	21.2554	21.0489	21.0932
G4VRF7	tr|G4VRF7|G4VRF7_SCHMA Putative junctophilin OS=Schistosoma mansoni GN=Smp_084090 PE=4 SV=1	9	125.7	-0.803408	17.2947	16.139	17.5537	16.9958	18.2553	18.1902	16.9522	17.7992
G4VRF8	tr|G4VRF8|G4VRF8_SCHMA Putative l-lactate dehydrogenase OS=Schistosoma mansoni GN=Smp_033040 PE=3 SV=1	9	35.713	-1.29955	21.9785	21.585	21.9787	21.8474	23.0316	23.2367	23.1726	23.147
G4VRG5	tr|G4VRG5|G4VRG5_SCHMA Long-chain-fatty-acid--CoA ligase OS=Schistosoma mansoni GN=Smp_209040 PE=4 SV=1	4	61.33	-1.17096	15.4875	16.3701	17.6904	16.516	18.2264	16.9424	17.8921	17.687
G4VRG8	tr|G4VRG8|G4VRG8_SCHMA Arf-related protein 1, arfrp1 OS=Schistosoma mansoni GN=Smp_037190 PE=4 SV=1	1	9.4238	-0.625787		18.8798		18.8798	19.2072	19.2532	20.0565	19.5056
G4VRH0	tr|G4VRH0|G4VRH0_SCHMA Carboxypeptidase N (M14 family) OS=Schistosoma mansoni GN=Smp_142190 PE=4 SV=1	2	38.35	-0.703381	15.6793	17.8325	15.9383	16.4833	16.2317	17.5633	17.7652	17.1867
G4VRI4	tr|G4VRI4|G4VRI4_SCHMA Putative short chain dehydrogenase OS=Schistosoma mansoni GN=Smp_171960 PE=4 SV=1	10	71.954	-1.8017	18.6178	18.2586	18.7011	18.5258	20.2899	20.1733	20.5193	20.3275
G4VRI7;G4VRI6	tr|G4VRI7|G4VRI7_SCHMA Family C78 non-peptidase homologue (C78 family) OS=Schistosoma mansoni GN=Smp_091190.2 PE=4 SV=1;tr|G4VRI6|G4VRI6_SCHMA Family C78 non-peptidase homologue (C78 family) OS=Schistosoma mansoni GN=Smp_091190.1 PE=4 SV=1	4	42.999	-1.89175	14.7028	17.1184	16.8719	16.231	18.2465	18.3278	17.7941	18.1228
G4VRJ2	tr|G4VRJ2|G4VRJ2_SCHMA Uncharacterized protein OS=Schistosoma mansoni GN=Smp_171900 PE=4 SV=1	2	15.217	0.291057	20.2544	19.6638	19.6688	19.8623	19.4432	19.7142	19.5565	19.5713
G4VRJ6	tr|G4VRJ6|G4VRJ6_SCHMA Putative sugar transporter OS=Schistosoma mansoni GN=Smp_171870 PE=4 SV=1	3	69.753	1.20583	17.492	16.2815	17.2582	17.0105	16.4692	15.4871	15.4579	15.8047
G4VRK1	tr|G4VRK1|G4VRK1_SCHMA Putative glyoxalase II (Hydroxyacylglutathione hydrolase) OS=Schistosoma mansoni GN=Smp_091010 PE=3 SV=1	12	28.692	-1.00354	23.4773	23.693	23.3303	23.5002	24.5369	24.7173	24.257	24.5038
G4VRK9	tr|G4VRK9|G4VRK9_SCHMA Uncharacterized protein OS=Schistosoma mansoni GN=Smp_053420 PE=4 SV=1	5	95.966	0.553889	18.0546	17.6993	16.8982	17.5507	17.1324	16.2713	17.5868	16.9968
G4VRL7	tr|G4VRL7|G4VRL7_SCHMA Putative eukaryotic translation initiation factor 2 gamma subunit (Eif-2-gamma) OS=Schistosoma mansoni GN=Smp_095150 PE=4 SV=1	8	51.275	-0.0568618	19.8297	19.968	20.0295	19.9424	20.0811	19.5461	20.3707	19.9993
G4VRN1	tr|G4VRN1|G4VRN1_SCHMA Peptidyl-prolyl cis-trans isomerase-like 4. ppil4 OS=Schistosoma mansoni GN=Smp_165540 PE=4 SV=1	3	38.389	-1.87455	18.1308	15.6707		16.9007	18.5845	18.9507	18.7906	18.7753
G4VRN3	tr|G4VRN3|G4VRN3_SCHMA Putative replication protein A OS=Schistosoma mansoni GN=Smp_080530 PE=4 SV=1	2	29.116	0.736265	17.1615	17.7464	17.8353	17.5811	16.9679	16.7435	16.8231	16.8448
G4VRN4	tr|G4VRN4|G4VRN4_SCHMA Afg3-like protein 2 (M41 family) OS=Schistosoma mansoni GN=Smp_165550 PE=3 SV=1	11	74.07	-0.549857	18.7572	18.6698	19.4346	18.9538	19.8128	19.2174	19.4808	19.5037
G4VRP8	tr|G4VRP8|G4VRP8_SCHMA Putative polypyrimidine tract binding protein OS=Schistosoma mansoni GN=Smp_142300 PE=4 SV=1	1	65.541	0.46254	16.3506	15.5551	16.43	16.1119	16.2643	15.2753	15.4085	15.6494
G4VRP9	tr|G4VRP9|G4VRP9_SCHMA T-cell immunomodulatory protein OS=Schistosoma mansoni GN=Smp_194920 PE=4 SV=1	9	69.138	0.899766	19.6566	19.4496	19.5946	19.5669	18.4975	18.4437	19.0602	18.6671
G4VRQ9	tr|G4VRQ9|G4VRQ9_SCHMA Putative beta-1,4-galactosyltransferase OS=Schistosoma mansoni GN=Smp_146430 PE=4 SV=1	4	27.576	-0.0783014	16.2439	17.2726	18.8986	17.4717	18.9923	15.4619	18.1958	17.55
G4VRR2	tr|G4VRR2|G4VRR2_SCHMA 2-oxoglutarate dehydrogenase OS=Schistosoma mansoni GN=Smp_044970 PE=4 SV=1	30	107.6	-1.3733	21.5575	21.0519	20.8083	21.1393	22.5784	22.3497	22.6096	22.5126
G4VRR3	tr|G4VRR3|G4VRR3_SCHMA 2-oxoglutarate dehydrogenase OS=Schistosoma mansoni GN=Smp_192960 PE=4 SV=1	2	4.2239	-1.06217	21.5546	21.956	21.3763	21.629	22.7259	22.4218	22.9257	22.6911
G4VRS1	tr|G4VRS1|G4VRS1_SCHMA Uncharacterized protein OS=Schistosoma mansoni GN=Smp_130580 PE=4 SV=1	4	44.314	1.44183		18.8327	17.5714	18.2021	16.9203	17.3747	15.9857	16.7602
G4VRS6	tr|G4VRS6|G4VRS6_SCHMA Uncharacterized protein OS=Schistosoma mansoni GN=Smp_088240 PE=4 SV=1	2	17.862	0.505999	21.0336	22.0216	22.0261	21.6938	20.769	21.2053	21.5892	21.1878
G4VRT6	tr|G4VRT6|G4VRT6_SCHMA Family S28 unassigned peptidase (S28 family) OS=Schistosoma mansoni GN=Smp_071610 PE=4 SV=1	5	53.6	0.0599098	19.9692	20.6215	20.7141	20.4349	20.4878	20.7038	19.9334	20.375
G4VRU0	tr|G4VRU0|G4VRU0_SCHMA Putative rab-2,4,14 OS=Schistosoma mansoni GN=Smp_071630 PE=4 SV=1	14	23.696	0.196377	23.445	23.7799	23.3579	23.5276	23.2021	23.4074	23.3841	23.3312
G4VRU2;G4VRU1	tr|G4VRU2|G4VRU2_SCHMA Putative arginine/serine-rich splicing factor OS=Schistosoma mansoni GN=Smp_071640.2 PE=4 SV=1;tr|G4VRU1|G4VRU1_SCHMA Putative arginine/serine-rich splicing factor OS=Schistosoma mansoni GN=Smp_071640.1 PE=4 SV=1	3	34.415	-0.602522	18.8842	17.8999	16.4526	17.7456	18.3481			18.3481
G4VRU9	tr|G4VRU9|G4VRU9_SCHMA 5-demethoxyubiquinone hydroxylase, mitochondrial OS=Schistosoma mansoni GN=Smp_180060 PE=3 SV=1	2	20.326	-1.80217	16.7799	16.5449	15.9106	16.4118	18.7646	18.2647	17.6126	18.214
G4VRV1;G4VRV0	tr|G4VRV1|G4VRV1_SCHMA Putative ef hand containing protein OS=Schistosoma mansoni GN=Smp_103740.1 PE=4 SV=1;tr|G4VRV0|G4VRV0_SCHMA EF hand containing protein OS=Schistosoma mansoni GN=Smp_103740.2 PE=4 SV=1	4	33.189	-2.29699	14.9759	17.6507	17.6167	16.7477	19.2807	19.2712	18.5824	19.0447
G4VRV4	tr|G4VRV4|G4VRV4_SCHMA Galactokinase OS=Schistosoma mansoni GN=Smp_078400 PE=4 SV=1	2	54.274	-0.26587			16.9686	16.9686	17.9511	18.3209	15.4313	17.2344
G4VRX3	tr|G4VRX3|G4VRX3_SCHMA Uncharacterized protein OS=Schistosoma mansoni GN=Smp_043390 PE=3 SV=1	3	87.204	-1.29119	18.6276	17.3834	19.0243	18.3451	19.7093	19.6092	19.5904	19.6363
G4VRY6;G4VRY7	tr|G4VRY6|G4VRY6_SCHMA Inositol-1-monophosphatase OS=Schistosoma mansoni GN=Smp_095000.2 PE=3 SV=1;tr|G4VRY7|G4VRY7_SCHMA Inositol-1-monophosphatase OS=Schistosoma mansoni GN=Smp_095000.1 PE=3 SV=1	6	29.215	-0.774337	19.7417	20.1905	20.4392	20.1238	20.9072	20.8911	20.896	20.8981
G4VRZ7	tr|G4VRZ7|G4VRZ7_SCHMA Putative beta-galactosidase OS=Schistosoma mansoni GN=Smp_011990 PE=4 SV=1	4	48.399	-0.562707	16.0802	18.2524		17.1663	17.5316	17.6528	18.0026	17.729
G4VRZ8	tr|G4VRZ8|G4VRZ8_SCHMA Uncharacterized protein OS=Schistosoma mansoni GN=Smp_177540 PE=4 SV=1	1	16.264	-0.587094	17.6194	17.5719	17.5339	17.575	18.1658	18.0469	18.2737	18.1621
G4VS06	tr|G4VS06|G4VS06_SCHMA Cytochrome-c oxidase OS=Schistosoma mansoni GN=Smp_128610 PE=4 SV=1	7	21.799	-0.317585	22.8717	22.7275	22.2941	22.6311	22.9241	22.9947	22.9272	22.9487
G4VS24	tr|G4VS24|G4VS24_SCHMA Putative lupus la ribonucleoprotein OS=Schistosoma mansoni GN=Smp_161160 PE=4 SV=1	2	36.908	-0.173236	17.2782	17.2019	16.575	17.0184	17.0086	17.1684	17.3978	17.1916
G4VS50;G4VS51	tr|G4VS50|G4VS50_SCHMA Uncharacterized protein OS=Schistosoma mansoni GN=Smp_096290.2 PE=4 SV=1;tr|G4VS51|G4VS51_SCHMA Uncharacterized protein OS=Schistosoma mansoni GN=Smp_096290.1 PE=4 SV=1	3	11.325	-0.415664	20.9394	20.3232	20.5628	20.6085	21.5282	20.4017	21.1425	21.0241
G4VS56	tr|G4VS56|G4VS56_SCHMA Uncharacterized protein OS=Schistosoma mansoni GN=Smp_162770 PE=4 SV=1	1	38.321	0.975735	19.9231	20.0313	20.9176	20.2906	19.3731	19.2935	19.2782	19.3149
G4VS57;G4VS58	tr|G4VS57|G4VS57_SCHMA Putative prohibitin OS=Schistosoma mansoni GN=Smp_075210.1 PE=4 SV=1;tr|G4VS58|G4VS58_SCHMA Putative prohibitin OS=Schistosoma mansoni GN=Smp_075210.2 PE=4 SV=1	11	27.724	-0.890221	22.4118	21.7372	22.5977	22.2489	23.3621	22.997	23.0583	23.1391
G4VS74	tr|G4VS74|G4VS74_SCHMA High-density lipoprotein receptor (Hdl) OS=Schistosoma mansoni GN=Smp_155920 PE=4 SV=1	7	56.137	-0.734881	18.7689	19.1033	19.1194	18.9972	19.7576	19.6898	19.7488	19.7321
G4VS91	tr|G4VS91|G4VS91_SCHMA Putative malic enzyme (Fragment) OS=Schistosoma mansoni GN=Smp_128360 PE=4 SV=1	3	24.306	-0.401385	19.9587	18.7581	19.4037	19.3735	20.0962	19.6671	19.5614	19.7749
G4VS93	tr|G4VS93|G4VS93_SCHMA Putative glutamate synthase OS=Schistosoma mansoni GN=Smp_128370 PE=4 SV=1	2	20.314	-0.0288367	20.873	19.3991	20.5474	20.2731	20.2412	19.8996	20.7651	20.302
G4VS94	tr|G4VS94|G4VS94_SCHMA Putative glutamate synthase OS=Schistosoma mansoni GN=Smp_128380 PE=4 SV=1	39	175.71	0.524942	20.558	20.3479	20.7207	20.5422	20.2308	19.8817	19.9393	20.0173
G4VS95	tr|G4VS95|G4VS95_SCHMA Putative tetraspanin (Fragment) OS=Schistosoma mansoni GN=Smp_011560 PE=4 SV=1	9	31.069	0.806751	25.0703	24.4964	25.0134	24.86	23.7364	24.2523	24.1711	24.0533
G4VS97;Q15ET6;G4VS96	tr|G4VS97|G4VS97_SCHMA 40S ribosomal protein S4 OS=Schistosoma mansoni GN=Smp_011570.2 PE=3 SV=1;tr|Q15ET6|Q15ET6_SCHMA 40S ribosomal protein S4 OS=Schistosoma mansoni PE=2 SV=1;tr|G4VS96|G4VS96_SCHMA 40S ribosomal protein S4 OS=Schistosoma mansoni GN=Smp_	7	28.096	1.78244	18.7301		19.1584	18.9442	17.8098	15.7346	17.9409	17.1618
G4VSA6	tr|G4VSA6|G4VSA6_SCHMA Putative histidine triad (Hit) protein OS=Schistosoma mansoni GN=Smp_048650 PE=4 SV=1	6	15.828	-0.0606154	22.161	22.354	21.9756	22.1635	22.5308	22.3396	21.802	22.2241
G4VSB4	tr|G4VSB4|G4VSB4_SCHMA Uncharacterized protein OS=Schistosoma mansoni GN=Smp_112660 PE=4 SV=1	1	8.6558	M only				N/A	18.0283	18.875	19.6955	18.8663
G4VSB7;B1AAM6	tr|G4VSB7|G4VSB7_SCHMA Putative four and A half lim domains OS=Schistosoma mansoni GN=Smp_048560 PE=4 SV=1;tr|B1AAM6|B1AAM6_SCHMA LIMPETin OS=Schistosoma mansoni PE=2 SV=1	13	32.286	-1.03388	22.7441	22.8739	23.0114	22.8765	23.9476	23.8733	23.9101	23.9103
G4VSB8	tr|G4VSB8|G4VSB8_SCHMA Synapse formation protein OS=Schistosoma mansoni GN=Smp_048550 PE=4 SV=1	2	39.487	F only	17.2488	16.0096	17.5059	16.9214				N/A
G4VSD1	tr|G4VSD1|G4VSD1_SCHMA Uncharacterized protein OS=Schistosoma mansoni GN=Smp_015480 PE=4 SV=1	10	82.868	-3.45713	14.8809		16.5715	15.7262	19.5952	18.7929	19.1619	19.1833
G4VSD8;G4VSD6;G4VSD7	tr|G4VSD8|G4VSD8_SCHMA Uncharacterized protein OS=Schistosoma mansoni GN=Smp_015530.1 PE=4 SV=1;tr|G4VSD6|G4VSD6_SCHMA Uncharacterized protein OS=Schistosoma mansoni GN=Smp_015530.3 PE=4 SV=1;tr|G4VSD7|G4VSD7_SCHMA Uncharacterized protein OS=Schistosoma ma	5	25.896	0.24479	20.371	21.2877	20.7867	20.8151	20.3062	20.8973	20.5076	20.5704
G4VSE3;G4VSE2;G4VSE1;G4VS80	tr|G4VSE3|G4VSE3_SCHMA Putative e1b-55kD-associated protein OS=Schistosoma mansoni GN=Smp_062720.2 PE=4 SV=1;tr|G4VSE2|G4VSE2_SCHMA Putative e1b-55kD-associated protein OS=Schistosoma mansoni GN=Smp_062720.1 PE=4 SV=1;tr|G4VSE1|G4VSE1_SCHMA Putative e1b-55	7	125.58	-0.034942	16.0875	16.162	15.475	15.9082	17.9489		13.9373	15.9431
G4VSF3	tr|G4VSF3|G4VSF3_SCHMA Putative lysosome-associated membrane glycoprotein OS=Schistosoma mansoni GN=Smp_032520.1 PE=3 SV=1	1	26.62	-0.00092864	21.6641	21.3673	20.9125	21.3146	20.9999	21.4039	21.5429	21.3156
G4VSF4	tr|G4VSF4|G4VSF4_SCHMA Putative importin-beta 3 OS=Schistosoma mansoni GN=Smp_032510 PE=4 SV=1	25	126.05	-1.17898	19.5528	20.0055	18.9555	19.5046	20.6808	20.7302	20.6397	20.6836
G4VSH4	tr|G4VSH4|G4VSH4_SCHMA Uncharacterized protein OS=Schistosoma mansoni GN=Smp_203950 PE=4 SV=1	5	23.196	-0.596402	21.8591	21.56	21.8376	21.7522	22.3685	22.3026	22.3748	22.3486
G4VSH5	tr|G4VSH5|G4VSH5_SCHMA Putative short chain dehydrogenase OS=Schistosoma mansoni GN=Smp_120070 PE=4 SV=1	2	36.138	-0.226765	20.9915	20.3221	20.5231	20.6122	20.8607	20.7101	20.9462	20.839
G4VSI1	tr|G4VSI1|G4VSI1_SCHMA Actin-related protein 2/3 complex subunit 3 OS=Schistosoma mansoni GN=Smp_032310 PE=3 SV=1	3	21.079	-0.651614	19.5951	19.5725	19.6302	19.5993	19.975	20.5132	20.2644	20.2509
G4VSJ5	tr|G4VSJ5|G4VSJ5_SCHMA Alpha-1,4 glucan phosphorylase OS=Schistosoma mansoni GN=Smp_143840 PE=3 SV=1	50	93.6	-1.02382	24.9191	24.8822	24.4895	24.7636	25.9688	25.6935	25.6999	25.7874
G4VSL5	tr|G4VSL5|G4VSL5_SCHMA Putative 6-phosphofructo-2-kinase/fructose-2,6-bisphosph at ase OS=Schistosoma mansoni GN=Smp_015710 PE=4 SV=1	10	53.242	0.573868	18.8503	19.6084	19.498	19.3189	18.6254	18.4859	19.1238	18.745
G4VSL7	tr|G4VSL7|G4VSL7_SCHMA Obg-like ATPase 1 OS=Schistosoma mansoni GN=Smp_015720 PE=3 SV=1	16	44.913	-0.299652	21.5421	21.7001	22.0832	21.7751	22.0441	22.1032	22.077	22.0748
G4VSL8	tr|G4VSL8|G4VSL8_SCHMA Uncharacterized protein OS=Schistosoma mansoni GN=Smp_015730 PE=4 SV=1	9	23.573	-0.979218	20.9805	21.0325	20.925	20.9794	22.0225	21.848	22.0052	21.9586
G4VSL9	tr|G4VSL9|G4VSL9_SCHMA Serine/threonine kinase OS=Schistosoma mansoni GN=Smp_199990 PE=4 SV=1	3	69.914	-0.377092	16.6757	16.6642	17.0568	16.7989	17.5039	16.7798	17.2443	17.176
G4VSN6	tr|G4VSN6|G4VSN6_SCHMA Acyl carrier protein OS=Schistosoma mansoni GN=Smp_015860 PE=3 SV=1	3	15.926	-0.907548	21.4089	21.4313	20.1234	20.9879	21.7389	22.0239	21.9235	21.8954
G4VSP0	tr|G4VSP0|G4VSP0_SCHMA Putative ecsit (Evolutionarily conserved signaling intermediate in toll pathways) OS=Schistosoma mansoni GN=Smp_015880 PE=4 SV=1	6	67.116	-1.55309	16.1877	16.3323	16.494	16.338	18.2027	17.7672	17.7033	17.8911
G4VSQ0	tr|G4VSQ0|G4VSQ0_SCHMA Putative maf protein OS=Schistosoma mansoni GN=Smp_061040 PE=3 SV=1	1	23.514	-0.855111	16.2954	16.5976	16.686	16.5263	17.7548	17.0081		17.3814
G4VSQ5	tr|G4VSQ5|G4VSQ5_SCHMA Superoxide dismutase OS=Schistosoma mansoni GN=Smp_056440 PE=3 SV=1	4	24.278	-0.877718	23.233	23.3673	23.5031	23.3678	24.243	24.3606	24.133	24.2455
G4VSR3	tr|G4VSR3|G4VSR3_SCHMA T-complex-associated-testis-expressed 1-related OS=Schistosoma mansoni GN=Smp_143780 PE=4 SV=1	2	12.587	0.139314	20.3602	20.7623	19.9332	20.3519	19.7424	20.4739	20.4215	20.2126
G4VSS2	tr|G4VSS2|G4VSS2_SCHMA Uroporphyrinogen decarboxylase OS=Schistosoma mansoni GN=Smp_143740 PE=3 SV=1	2	41.422	-0.47543	16.3665	15.5488	16.3985	16.1046		16.6231	16.537	16.5801
G4VSS4	tr|G4VSS4|G4VSS4_SCHMA Putative carboxypeptidase regulatory region-containing OS=Schistosoma mansoni GN=Smp_143730 PE=4 SV=1	13	156.92	-0.572317	17.3498	17.6819	16.6371	17.2229	17.5194	17.7269	18.1394	17.7952
G4VST0	tr|G4VST0|G4VST0_SCHMA Putative smap1 OS=Schistosoma mansoni GN=Smp_142850 PE=4 SV=1	5	41.922	0.121357	18.5976	17.8245	18.65	18.3574	18.2117	18.2405	18.2558	18.236
G4VST9	tr|G4VST9|G4VST9_SCHMA Putative dead box ATP-dependent RNA helicase OS=Schistosoma mansoni GN=Smp_163110 PE=4 SV=1	13	82.385	-0.267366	20.0222	20.1203	19.4942	19.8789	20.095	20.1798	20.164	20.1463
G4VSU5	tr|G4VSU5|G4VSU5_SCHMA Putative transmembrane 9 superfamily protein member OS=Schistosoma mansoni GN=Smp_163130 PE=4 SV=1	4	128.98	0.529282	17.1026	15.153	18.3774	16.8777	16.8654	14.8699	17.3098	16.3484
G4VSW2	tr|G4VSW2|G4VSW2_SCHMA Putative lysosome-associated membrane glycoprotein OS=Schistosoma mansoni GN=Smp_073400 PE=4 SV=1	2	27.695	-0.350977	19.699	19.8525	20.0882	19.8799	20.0723	20.2939	20.3265	20.2309
G4VSW3	tr|G4VSW3|G4VSW3_SCHMA Proteasome subunit beta type OS=Schistosoma mansoni GN=Smp_073410 PE=3 SV=1	4	30.539	-0.0732976	21.5751	21.7207	21.0902	21.462	21.5002	21.5621	21.5437	21.5353
G4VSW4	tr|G4VSW4|G4VSW4_SCHMA Uncharacterized protein OS=Schistosoma mansoni GN=Smp_073450 PE=4 SV=1	51	414.5	3.56931	20.2494	20.3736	20.5666	20.3966	17.5806	16.3121	16.589	16.8273
G4VSX8	tr|G4VSX8|G4VSX8_SCHMA Deoxyhypusine hydroxylase OS=Schistosoma mansoni GN=dohh PE=2 SV=1	9	39.72	0.195784	21.4923	21.1936	21.7155	21.4671	20.9706	21.3445	21.4989	21.2713
G4VSY1;G4VSY2;G4VSY3;G4VSY0;G4VSX9;G4VSY4;G4VSY5	tr|G4VSY1|G4VSY1_SCHMA Putative p30 dbc protein OS=Schistosoma mansoni GN=Smp_056360.6 PE=4 SV=1;tr|G4VSY2|G4VSY2_SCHMA Putative p30 dbc protein OS=Schistosoma mansoni GN=Smp_056360.8 PE=4 SV=1;tr|G4VSY3|G4VSY3_SCHMA Putative p30 dbc protein OS=Schistosoma	29	100.23	0.0263439	23.243	22.9807	22.3283	22.8507	22.762	22.6423	23.0686	22.8243
G4VSZ1;G4VSZ2;G4VSZ0	tr|G4VSZ1|G4VSZ1_SCHMA Protein kinase OS=Schistosoma mansoni GN=Smp_011660.2 PE=4 SV=1;tr|G4VSZ2|G4VSZ2_SCHMA Protein kinase OS=Schistosoma mansoni GN=Smp_011660.1 PE=4 SV=1;tr|G4VSZ0|G4VSZ0_SCHMA Protein kinase OS=Schistosoma mansoni GN=Smp_011660.3 PE=4	11	58.5	-0.371143	21.134	20.2841	21.0858	20.8346	21.2674	21.0551	21.2948	21.2058
G4VSZ7	tr|G4VSZ7|G4VSZ7_SCHMA Putative 30s ribosomal protein S2 (Prokaryotic and organellar) OS=Schistosoma mansoni GN=Smp_102840.1 PE=3 SV=1	2	28.997	-0.252192		17.2232	17.5046	17.3639	17.5056	18.1899	17.1528	17.6161
G4VSZ8	tr|G4VSZ8|G4VSZ8_SCHMA Uncharacterized protein OS=Schistosoma mansoni GN=Smp_179460 PE=4 SV=1	4	10.454	-1.11358	21.2952	21.5908	20.7213	21.2024	22.5132	22.38	22.0549	22.316
G4VT07	tr|G4VT07|G4VT07_SCHMA Uncharacterized protein OS=Schistosoma mansoni GN=Smp_011830 PE=4 SV=1	13	24.484	0.381326	24.8013	24.126	24.2789	24.402	24.1275	24.0233	23.9114	24.0207
G4VT15	tr|G4VT15|G4VT15_SCHMA Uncharacterized protein OS=Schistosoma mansoni GN=Smp_059930 PE=4 SV=1	5	7.7307	-1.37528	20.7663	21.0426	20.3978	20.7356	22.0123	22.4363	21.8839	22.1109
G4VT40	tr|G4VT40|G4VT40_SCHMA Pyruvate dehydrogenase E1 component subunit alpha OS=Schistosoma mansoni GN=Smp_079920 PE=4 SV=1	14	44.045	-0.236042	22.1912	22.3036	22.2792	22.258	22.3653	22.5082	22.6086	22.4941
G4VT42	tr|G4VT42|G4VT42_SCHMA Putative vacuolar ATP synthase subunit ac39 OS=Schistosoma mansoni GN=Smp_079950 PE=4 SV=1	6	37.111	0.483589	21.4206	21.0846	21.4072	21.3041	20.6608	20.7966	21.0041	20.8205
G4VT43	tr|G4VT43|G4VT43_SCHMA Subfamily M3A non-peptidase homologue (M03 family) OS=Schistosoma mansoni GN=Smp_173140 PE=3 SV=1	10	115.02	-1.74219	17.1053	16.2693	16.5942	16.6563	18.351	18.2647	18.5798	18.3985
G4VT47	tr|G4VT47|G4VT47_SCHMA Putative clathrin coat associated protein ap-50 OS=Schistosoma mansoni GN=Smp_026540 PE=3 SV=1	2	122.66	0.0847915	15.9754	14.7891	15.758	15.5075	16.0943	15.0656	15.1083	15.4227
G4VT52	tr|G4VT52|G4VT52_SCHMA Protein kinase OS=Schistosoma mansoni GN=Smp_026510 PE=4 SV=1	8	60.025	0.0994167	19.4382	19.3748	19.5222	19.4451	19.3868	19.3684	19.2818	19.3457
G4VT56	tr|G4VT56|G4VT56_SCHMA Putative calcineurin B subunit OS=Schistosoma mansoni GN=Smp_026420 PE=4 SV=1	1	21.788	-0.123882	17.1429	18.0443	18.1832	17.7901		17.5732	18.2548	17.914
G4VT61	tr|G4VT61|G4VT61_SCHMA Uncharacterized protein OS=Schistosoma mansoni GN=Smp_026460 PE=4 SV=1	7	27.232	-0.52058	20.0354	19.8763	18.7196	19.5438	19.9891	20.0133	20.1906	20.0643
G4VT73	tr|G4VT73|G4VT73_SCHMA Elongation factor G, mitochondrial OS=Schistosoma mansoni GN=Smp_075690 PE=3 SV=1	3	72.564	-2.10495		14.6153	15.3272	14.9712	17.2479	16.6643	17.3163	17.0762
G4VT90	tr|G4VT90|G4VT90_SCHMA Putative small nuclear ribonucleoprotein Sm D2 OS=Schistosoma mansoni GN=Smp_075560 PE=4 SV=1	2	14.03	0.448865	20.7874	19.5806	19.8374	20.0685	20.0583	19.7206	19.0799	19.6196
G4VT95	tr|G4VT95|G4VT95_SCHMA Uncharacterized protein OS=Schistosoma mansoni GN=Smp_070380 PE=4 SV=1	1	19.694	0.89976	22.3982	21.8905	22.242	22.1769	21.0918	21.2124	21.5271	21.2771
G4VTA1	tr|G4VTA1|G4VTA1_SCHMA Putative fun14 domain containing OS=Schistosoma mansoni GN=Smp_070330 PE=4 SV=1	1	14.151	0.529658	20.2353	19.6326		19.9339	19.1277	19.7059	19.3792	19.4043
G4VTB0	tr|G4VTB0|G4VTB0_SCHMA Putative adhesion regulating molecule 1 (110 kD cell membrane glycoprotein) OS=Schistosoma mansoni GN=Smp_080040 PE=4 SV=1	2	24.844	-0.374704	20.9044	20.8459	20.1375	20.6293	20.2002	21.5744	21.2373	21.004
G4VTB5	tr|G4VTB5|G4VTB5_SCHMA Putative placenta-specificprotein 8 protein (C15 protein) (Onzin) OS=Schistosoma mansoni GN=Smp_101970 PE=4 SV=1	4	13.365	-0.245015	23.6567	23.1813	23.4859	23.4413	23.8753	23.6223	23.5613	23.6863
G4VTD5;Q95W35	tr|G4VTD5|G4VTD5_SCHMA Putative eukaryotic translation initiation factor 2 alpha subunit OS=Schistosoma mansoni GN=Smp_093750.1 PE=4 SV=1;tr|Q95W35|Q95W35_SCHMA Eukaryotic translation initiation factor 2 alpha subunit OS=Schistosoma mansoni GN=Smp_093750.2	11	36.685	-0.700857	20.7013	21.3818	21.5056	21.1962	21.9193	21.7944	21.9775	21.8971
G4VTD8;G4VTD6;G4VTD7	tr|G4VTD8|G4VTD8_SCHMA Putative hepatocyte growth factor-regulated tyrosine kinase substrate (Hgs) OS=Schistosoma mansoni GN=Smp_093740.2 PE=4 SV=1;tr|G4VTD6|G4VTD6_SCHMA Putative hepatocyte growth factor-regulated tyrosine kinase substrate (Hgs) OS=Schist	9	63.709	-1.33293	22.6652	18.8699	17.8147	19.7832	21.8387	19.1393	22.3706	21.1162
G4VTE3;G4VTE1;G4VTE4;G4VTE2	tr|G4VTE3|G4VTE3_SCHMA Putative profilin splice variant 4 OS=Schistosoma mansoni GN=PFN1 PE=2 SV=1;tr|G4VTE1|G4VTE1_SCHMA Putative profilin splice variant 3 OS=Schistosoma mansoni GN=PFN1 PE=2 SV=1;tr|G4VTE4|G4VTE4_SCHMA Uncharacterized protein OS=Schistos	7	15.02	-0.206231	25.1646	24.9596	24.4366	24.8536	25.1164	25.2037	24.8594	25.0598
G4VTF2	tr|G4VTF2|G4VTF2_SCHMA Putative dynein heavy chain OS=Schistosoma mansoni GN=Smp_165820 PE=4 SV=1	3	521.53	-1.48733	14.0812	13.7375		13.9094	15.3656	15.0185	15.806	15.3967
G4VTG6	tr|G4VTG6|G4VTG6_SCHMA Putative clathrin coat assembly protein AP17 OS=Schistosoma mansoni GN=Smp_143060 PE=4 SV=1	3	16.935	0.148413	20.3265	20.1014	19.1905	19.8728	19.2303	19.7552	20.1875	19.7244
G4VTH2	tr|G4VTH2|G4VTH2_SCHMA Eukaryotic translation initiation factor 3 subunit 5 (M67 family) OS=Schistosoma mansoni GN=Smp_078320 PE=4 SV=1	5	20.391	0.252719	18.3702	19.7681	19.7693	19.3025	19.1954	18.8159	19.1381	19.0498
G4VTH3	tr|G4VTH3|G4VTH3_SCHMA Putative transportin OS=Schistosoma mansoni GN=Smp_164410 PE=4 SV=1	4	124.84	-1.8413	15.4263	13.829		14.6277	16.9086	15.9286	16.5698	16.469
G4VTH8	tr|G4VTH8|G4VTH8_SCHMA Uncharacterized protein OS=Schistosoma mansoni GN=Smp_160270 PE=4 SV=1	1	57.263	0.0890413	16.9717	17.0692	16.4836	16.8415	16.9291	16.2806	17.0476	16.7524
G4VTI2	tr|G4VTI2|G4VTI2_SCHMA Alpha-mannosidase OS=Schistosoma mansoni GN=Smp_131580 PE=3 SV=1	9	109.56	-0.527864	19.1682	19.3081	19.3287	19.2683	19.552	19.9332	19.9033	19.7962
G4VTJ6;A9NI61	tr|G4VTJ6|G4VTJ6_SCHMA Putative 26s protease regulatory subunit S10b OS=Schistosoma mansoni GN=Smp_017070 PE=3 SV=1;tr|A9NI61|A9NI61_SCHMA 26S proteasome subunit RPT4 (Fragment) OS=Schistosoma mansoni GN=RPT4 PE=2 SV=1	12	44.082	-0.396028	19.9893	20.6	20.4212	20.3368	20.6071	20.8006	20.7908	20.7329
G4VTK3;G4VTK5;G4VTK4	tr|G4VTK3|G4VTK3_SCHMA Uncharacterized protein OS=Schistosoma mansoni GN=Smp_017010.1 PE=4 SV=1;tr|G4VTK5|G4VTK5_SCHMA Uncharacterized protein OS=Schistosoma mansoni GN=Smp_017010.5 PE=4 SV=1;tr|G4VTK4|G4VTK4_SCHMA Uncharacterized protein OS=Schistosoma ma	22	107.06	-0.643709	19.6887	20.1693	18.9959	19.618	20.2853	20.2228	20.2769	20.2617
G4VTL1	tr|G4VTL1|G4VTL1_SCHMA Putative titin OS=Schistosoma mansoni GN=Smp_163920 PE=4 SV=1	47	394.88	0.478674	19.575	19.6199	19.7528	19.6492	19.1984	18.9175	19.3957	19.1706
G4VTL2	tr|G4VTL2|G4VTL2_SCHMA Putative titin OS=Schistosoma mansoni GN=Smp_188590 PE=4 SV=1	2	25.162	0.843222	19.1853	19.6032	19.6931	19.4939	18.4636	18.2836	19.2048	18.6506
G4VTM0	tr|G4VTM0|G4VTM0_SCHMA Uncharacterized protein OS=Schistosoma mansoni GN=Smp_163840 PE=4 SV=1	6	28.771	0.491838	22.966	22.4283	22.4006	22.5983	22.4671	22.2695	21.5827	22.1064
G4VTM4	tr|G4VTM4|G4VTM4_SCHMA Autophagy-related protein 3 OS=Schistosoma mansoni GN=Smp_077400 PE=3 SV=1	6	37.43	0.0349574	21.0122	21.3479	21.3533	21.2378	21.1911	21.3707	21.0468	21.2028
G4VTM7	tr|G4VTM7|G4VTM7_SCHMA Putative laminin gamma-1 chain OS=Schistosoma mansoni GN=Smp_163810 PE=4 SV=1	13	139.65	0.948218	20.2911	20.0285	19.8677	20.0624	19.2031	18.9196	19.2199	19.1142
G4VTM8	tr|G4VTM8|G4VTM8_SCHMA Uncharacterized protein (Fragment) OS=Schistosoma mansoni GN=Smp_187680 PE=4 SV=1	4	12.242	0.80026	21.8044	21.7407	21.6396	21.7283	20.9474	20.8196	21.017	20.928
G4VTM9	tr|G4VTM9|G4VTM9_SCHMA Uncharacterized protein OS=Schistosoma mansoni GN=Smp_077330 PE=4 SV=1	8	26.917	0.495941	21.7644	21.6571	21.5475	21.6563	21.2191	20.848	21.4141	21.1604
G4VTN2	tr|G4VTN2|G4VTN2_SCHMA Putative tegumental protein OS=Schistosoma mansoni GN=SmTAL9 PE=2 SV=1	8	21.764	0.330657	21.1418	21.3977	21.0911	21.2102	20.7995	21.0047	20.8345	20.8796
G4VTN3	tr|G4VTN3|G4VTN3_SCHMA Putative wd-repeat protein OS=Schistosoma mansoni GN=Smp_163780 PE=4 SV=1	6	57.61	0.0907081	18.5315	18.7442	17.9135	18.3964	18.5435	18.5238	17.8497	18.3057
G4VTQ0	tr|G4VTQ0|G4VTQ0_SCHMA SmKK7 OS=Schistosoma mansoni GN=Smp_194830 PE=4 SV=1	2	9.2736	0.0322184	23.209	22.3218	24.6725	23.4011	24.3784	22.9209	22.8073	23.3689
G4VTQ2	tr|G4VTQ2|G4VTQ2_SCHMA Uncharacterized protein OS=Schistosoma mansoni GN=Smp_203580 PE=4 SV=1	4	9.5454	-0.283448	23.1704	22.3837	22.3602	22.6381	22.7175	23.001	23.0462	22.9216
G4VTQ3	tr|G4VTQ3|G4VTQ3_SCHMA Putative arf gtpase-activating protein OS=Schistosoma mansoni GN=Smp_179610 PE=4 SV=1	5	38.384	-0.317845	18.8214	19.8831	19.3231	19.3425	19.5357	19.8035	19.6419	19.6604
G4VTQ5	tr|G4VTQ5|G4VTQ5_SCHMA Nuclear pore protein OS=Schistosoma mansoni GN=Smp_103100 PE=3 SV=1	4	105.69	-0.133336	16.4381	16.5913	16.4616	16.497			16.6303	16.6303
G4VTQ7	tr|G4VTQ7|G4VTQ7_SCHMA Putative p30 dbc protein OS=Schistosoma mansoni GN=Smp_193440 PE=4 SV=1	11	126.6	0.296846	19.003	17.7343	18.1729	18.3034	18.4815	17.4791	18.0591	18.0066
G4VTR2	tr|G4VTR2|G4VTR2_SCHMA Putative choline dehydrogenase OS=Schistosoma mansoni GN=Smp_094500 PE=3 SV=1	8	130.06	1.94888	18.5694	18.3212	18.5404	18.477	17.065		15.9912	16.5281
G4VTR5	tr|G4VTR5|G4VTR5_SCHMA Putative guanine nucleotide-binding protein beta 1, 4 (G protein beta1, 4) OS=Schistosoma mansoni GN=Smp_094480 PE=4 SV=1	11	41.445	0.141001	21.0648	20.8345	21.1116	21.0036	20.6318	20.6737	21.2824	20.8626
G4VTR8	tr|G4VTR8|G4VTR8_SCHMA Uncharacterized protein OS=Schistosoma mansoni GN=Smp_173900 PE=4 SV=1	4	45.682	-0.77165	17.9117	17.2137	17.4875	17.5376	18.0774	18.1251	18.7253	18.3093
G4VTS1	tr|G4VTS1|G4VTS1_SCHMA Sh3 domain-binding glutamic acid-rich-like protein OS=Schistosoma mansoni GN=Smp_170030 PE=4 SV=1	6	36.966	-0.332015	20.3741	20.3814	20.1472	20.3009	20.4802	20.7143	20.7041	20.6329
G4VTT5	tr|G4VTT5|G4VTT5_SCHMA Uncharacterized protein OS=Schistosoma mansoni GN=Smp_094820 PE=4 SV=1	5	28.641	-0.461785	20.0312	19.747	19.0831	19.6204	19.9391	20.5197	19.7879	20.0822
G4VTW0;G4VTW1	tr|G4VTW0|G4VTW0_SCHMA Acetyltransferase-related OS=Schistosoma mansoni GN=Smp_132850.2 PE=4 SV=1;tr|G4VTW1|G4VTW1_SCHMA Acetyltransferase-related OS=Schistosoma mansoni GN=Smp_132850.1 PE=4 SV=1	4	72.963	0.0137845	16.6116	15.1174	16.8822	16.2038	17.4157	14.9745	16.1798	16.19
G4VTW2	tr|G4VTW2|G4VTW2_SCHMA Putative otoferlin OS=Schistosoma mansoni GN=Smp_163750 PE=4 SV=1	2	203.12	-1.92507	15.6851	17.1982	17.6464	16.8433	18.9547	18.5918	18.7585	18.7683
G4VTW4	tr|G4VTW4|G4VTW4_SCHMA Niemann pick c2 (NPC2) OS=Schistosoma mansoni GN=Smp_194840 PE=4 SV=1	1	10.946	1.14867	22.3415	22.0717	21.735	22.0494	21.2068	20.7355	20.76	20.9007
G4VTX0	tr|G4VTX0|G4VTX0_SCHMA Putative endophilin B1 OS=Schistosoma mansoni GN=Smp_163720 PE=4 SV=1	10	26.844	0.8932	22.8844	23.2437	23.4087	23.1789	21.7364	22.6174	22.5033	22.2857
G4VTX6	tr|G4VTX6|G4VTX6_SCHMA Rna-binding protein related OS=Schistosoma mansoni GN=Smp_163680 PE=4 SV=1	2	84.876	-0.205265	14.8744	16.6876	16.2702	15.9441	15.089	17.351	16.008	16.1494
G4VTX8	tr|G4VTX8|G4VTX8_SCHMA Putative nitrogen fixation protein nifu OS=Schistosoma mansoni GN=Smp_077090 PE=3 SV=1	3	15.789	-1.10711	19.434	19.6773	18.7834	19.2982	20.329	20.432	20.4549	20.4053
[truncated: 140 more rows]
