# Supplementary material for: Evolution of gene dosage on the Z-chromosome of schistosome parasites
Source: eLife. 2018 Jul 25;7:e35684. doi: 10.7554/eLife.35684 (PMC6089595; doi:10.7554/eLife.35684)
Supplement: Figure 4—source data 5. [file elife-35684-fig4-data5.xlsx]

## Sheet: Figure 4-source data 5
Figure 4-source data 5: Correponsdance between Gene_Id and Protein_ID
Gene_ID	Prot-ID_Gonads	Prot-ID_Heads
Smp_000020	G4LUF3	G4LUF3
Smp_000030	G4LUF6;G4LUF5;G4LUF4	G4LUF5;G4LUF6;G4LUF4
Smp_000040	G4LUF7	G4LUF7
Smp_000070	G4LUG1	G4LUG1
Smp_000100	G4LVU8	G4LVU8
Smp_000190	G4LVT4	n.a.
Smp_000240	G4LVS7;G4LVS6	G4LVS7;G4LVS6
Smp_000260	G4LVS4	G4LVS4
Smp_000320	G4LVR3	G4LVR3
Smp_000440	G4LYJ1	n.a.
Smp_000460	G4LYJ0	G4LYJ0
Smp_000470	G4LYI8	G4LYI8
Smp_000480	G4LYI7	G4LYI7
Smp_000510	G4LYI3	G4LYI3
Smp_000590	G4LYH3	n.a.
Smp_000600	G4LYH2	n.a.
Smp_000660	A7UAX6;G4LYG5;A7UAX7	A7UAX6;G4LYG5;A7UAX7
Smp_000680	G4LYG3	n.a.
Smp_000700	n.a.	G4LYG1
Smp_000730	G4LYF8	G4LYF8
Smp_000740	Q547D2;O17453;Q8MZS5;G4V670	Q8MZS5;Q547D2;O17453;G4V670
Smp_000755	G4V669	G4V669
Smp_000810	G4V664;G4V663	G4V664;G4V663
Smp_000890	G4V5T0	n.a.
Smp_000980	Q1JPR1	Q1JPR1
Smp_001000	n.a.	G4V5S2
Smp_001030	G4V5R9	G4V5R9
Smp_001040	G4V5R8	G4V5R8
Smp_001090	G4V5R1	n.a.
Smp_001095	G4V5R0	n.a.
Smp_001100	n.a.	G4V5Q9
Smp_001120	G4V5Q8	n.a.
Smp_001170	G4V5Q4	G4V5Q4
Smp_001360	C4PXA6	C4PXA6
Smp_001410	G4VDP7	G4VDP7
Smp_001420	n.a.	G4LVN3
Smp_001500	G4VCF5	G4VCF5
Smp_001590	G4VCG3	n.a.
Smp_001610	G4VCG5	n.a.
Smp_001640	n.a.	G4VCG8
Smp_001830	G4VLF6;G4VLF7	G4VLF6;G4VLF7
Smp_001940	Q15ER9;G4VPT4	n.a.
Smp_001950	n.a.	G4VLH0
Smp_001960	G4VLH1	n.a.
Smp_002080	G4VLI2	G4VLI2
Smp_002150	n.a.	V5UMR3;G4VLL0
Smp_002180	G4VLL3	G4VLL3
Smp_002190	G4VLL4	G4VLL4
Smp_002280	G4VLM1	G4VLM1
Smp_002380	G4LVL0	G4LVL0
Smp_002410	Q95W36	Q95W36
Smp_002510	G4VF59	G4VF59
Smp_002550	G4VF54;G4VF55	G4VF54;G4VF55
Smp_002600	G4VF49	G4VF49
Smp_002810	G4VLJ8	n.a.
Smp_002880	G4VLJ0	G4VLJ0
Smp_002930	G4VFE8;G4VCW3;G4VCW1;G4V9N3	n.a.
Smp_003110	n.a.	G4V6Y4;G4V6Y3
Smp_003140	G4V6X9	G4V6X9
Smp_003230	G4V6X1	G4V6X1
Smp_003340	G4V6W0	n.a.
Smp_003410	G4V6P4	G4V6P4
Smp_003610	n.a.	G4V6M3;G4V6M2
Smp_003630	G4V6M0	G4V6M0
Smp_003660	G4V6L7	G4V6L7
Smp_003700	G4V6L4	n.a.
Smp_003710	G4VJX4	G4VJX4
Smp_003770	G4V6K8	G4V6K8
Smp_003940	G4V6C7	n.a.
Smp_003970	G4V6C2	G4V6C2
Smp_003980	G4V6C0	G4V6C0
Smp_003990	G4V6B9;P48501	G4V6B9;P48501
Smp_004020	G4V6B6	G4V6B6
Smp_004060	G4V6B3	n.a.
Smp_004070	G4V6B2	G4V6B2
Smp_004080	G4V6B1	G4V6B1
Smp_004120	G4LVK0	G4LVK0
Smp_004220	G4VCJ0;O02034	G4VCJ0;O02034
Smp_004280	G4VCJ7	G4VCJ7
Smp_004350	G4LXI7	G4LXI7
Smp_004360	G4LXI6	G4LXI6
Smp_004470	G4LXH7;Q9GNF6	G4LXH7;Q9GNF6
Smp_004480	G4LXH6	G4LXH6
Smp_004550	G4LXG8	G4LXG8
Smp_004600	G4VHD9	G4VHD9
Smp_004640	G4VD46	n.a.
Smp_004780	G4VD59;G4VD58;Q7JQ21;Q26583;G4VD60	G4VD59;G4VD58;Q7JQ21;Q26583;G4VD60
Smp_004810	Q3ZFF5;G4VD64;G4VD63	Q3ZFF5;G4VD64;G4VD63
Smp_004910	C4PY91	C4PY91
Smp_004940	G4V5M1	n.a.
Smp_004980	G4V5L6	n.a.
Smp_004990	G4V5L4	G4V5L4
Smp_005000	G4V5L5	G4V5L5
Smp_005010	G4VQX4	n.a.
Smp_005060	G4V5M2	G4V5M2
Smp_005080	G4V5M6;G4V5M5;G4V5M7	n.a.
Smp_005180	G4V5Z8	G4V5Z8
Smp_005210	A5H658;G4V604	G4V604;A5H658
Smp_005230	G4V609;G4V611;G4V610	G4V610;G4V609;G4V611
Smp_005260	G4LZ21	G4LZ21;G4LZ20
Smp_005290	G4LZ24	G4LZ24
Smp_005350	G4LZ30;P15845	G4LZ30;P15845
Smp_005390	G4LZK7;G4LZK6	n.a.
Smp_005500	n.a.	G4LXX4
Smp_005720	n.a.	G4V740
Smp_005790	G4V734	G4V734
Smp_005860	G4V725;G4V724;G4V723	G4V725;G4V724;G4V723
Smp_005880	G4V721;Q9XYR4	G4V721;Q9XYR4
Smp_006000	G4V713	G4V713
Smp_006060	G4V6V0	n.a.
Smp_006190	G4VQR4	G4VQR4
Smp_006320	G4VQQ6	G4VQQ6
Smp_006350	G4VR34;G4VR35	n.a.
Smp_006390	Q7YW72	Q7YW72
Smp_006440	G4LZ56	G4LZ56
Smp_006550	G4V9X6	G4V9X6
Smp_006560	G4V9X4	G4V9X4
Smp_006710	G4V9V5	n.a.
Smp_006720	G4V9V3;G4V9V4	G4V9V3;G4V9V4
Smp_006740	G4V9U9	G4V9U9
Smp_006780	G4V884	n.a.
Smp_006830	G4V889;G4V888;G4V890	G4V890;G4V889;G4V888
Smp_006860	G4V895;G4V896	G4V895
Smp_006920	G4LWG5;C5J9R9	G4LWG5;C5J9R9
Smp_006970	n.a.	G4LWG0
Smp_006990	G4VDF4	G4VDF4
Smp_007000	G4VDF5	n.a.
Smp_007170	G4VB16	G4VB16
Smp_007180	G4VB15	n.a.
Smp_007260	Q27779;G4VB09	Q27779;G4VB09
Smp_007270	n.a.	G4VB07;G4VB06
Smp_007450	G4VPP0;G4VPN9	n.a.
Smp_007500	G4VF21	G4VF21
Smp_007540	G4M024	n.a.
Smp_007550	G4M023	G4M023
Smp_007630	G4VPZ5	G4VPZ5;G4VPZ4
Smp_007640	G4VPZ3	G4VPZ3
Smp_007650	G4VPZ2	G4VPZ2
Smp_007660	G4VPZ1	n.a.
Smp_007760	G4VPX8	G4VPX8
Smp_007770	G4VPX5	n.a.
Smp_007900	G4V5P4;G4V5P5	G4V5P4;G4V5P5
Smp_007960	G4VJ60	G4VJ60
Smp_007970	G4VJ59	n.a.
Smp_008070	Q8T9N5	Q8T9N5
Smp_008140	G4V7I6;G4V7I7	n.a.
Smp_008230	G4V7H8	G4V7H8
Smp_008260	n.a.	G4V7H6
Smp_008310	G4V7H1;O17462	n.a.
Smp_008320	G4V7H0	G4V7H0
Smp_008360	G4V7G8	G4V7G8
Smp_008430	G4V5H1	n.a.
Smp_008470	G4V5G9;G4V5H0	n.a.
Smp_008490	G4V5G7	G4V5G7
Smp_008500	G4V5G6;G4V5G5	n.a.
Smp_008660	G4VIJ1;G4VIJ0	G4VIJ1;G4VIJ0
Smp_008770	G4VII4	n.a.
Smp_008830	G4VIH9	G4VIH9
Smp_008860	G4VIE6	G4VIE6
Smp_008900	G4VIE9	n.a.
Smp_009030	G4VIG3	n.a.
Smp_009310	G4VL28;G4VL27;G4VL30;G4VL29;G4VL26;O61652;Q9N2M6	G4VL28;G4VL27;G4VL30;G4VL29;G4VL26;O61652;Q9N2M6
Smp_009320	G4VL24;G4VL25	G4VL24;G4VL25
Smp_009340	G4VL20	n.a.
Smp_009390	G4VL14;G4VL15	G4VL14;G4VL15
Smp_009400	G4VL13	n.a.
Smp_009420	G4VL11	n.a.
Smp_009430	G4M209	n.a.
Smp_009520	G4V9R9	n.a.
Smp_009600	Q5UES2;G4V5L2	n.a.
Smp_009650	G4LYP2;G4LYP1	G4LYP2;G4LYP1
Smp_009690	C4PZS5;C4PZS6	C4PZS5;C4PZS6
Smp_009710	C4PZT0;C4PZS9	n.a.
Smp_009760	Q26540;G4LUI9;A0A0R5RJG2	Q26540;G4LUI9;A0A0R5RJG2
Smp_009780	G4LUI7;G4LUI8	G4LUI7;G4LUI8
Smp_009830	G4LUH9	G4LUH9
Smp_010090	G4VET6	G4VET6
Smp_010100	C4PZQ3	n.a.
Smp_010160	G4VES6	G4VES6
Smp_010230	G4LUG8	G4LUG8
Smp_010290	G4M0X2	G4M0X2
Smp_010370	G4VML4	n.a.
Smp_010550	n.a.	G4VMN2
Smp_010620	G4VMN6	G4VMN6
Smp_010660	n.a.	G4VMN8
Smp_010670	n.a.	G4VMN9
Smp_010690	G4VMP1	G4VMP1
Smp_010710	G4VMP3	G4VMP3
Smp_010820	n.a.	C0L926;G4VMQ7
Smp_010900	G4VMR4	n.a.
Smp_010930	G4VMR7	G4VMR7
Smp_010940	G4VMR8;G4VMR9;Q86QS6	G4VMR8;G4VMR9;Q86QS6
Smp_011010	G4VKU4	G4VKU4
Smp_011030	G4VKU2	n.a.
Smp_011120	G4VD99	G4VD99
Smp_011230	G4VD88	G4VD88
Smp_011270	n.a.	G4VD85;G4VD84;G4VD83
Smp_011560	G4VS95	G4VS95
Smp_011570	G4VS97;G4VS96;Q15ET6	G4VS97;Q15ET6;G4VS96
Smp_011660	G4VSZ1;G4VSZ2;G4VSZ0	G4VSZ1;G4VSZ2;G4VSZ0
Smp_011680	Q304T1;G4VSZ3	Q304T1;G4VSZ3
Smp_011720	G4VSZ9	n.a.
Smp_011830	G4VT07	G4VT07
Smp_011870	G4VT12	n.a.
Smp_011990	G4VRZ7	G4VRZ7
Smp_012070	G4VS07	n.a.
Smp_012110	G4VS08	n.a.
Smp_012280	G4VC62	G4VC62
Smp_012350	G4VC55;Q1WL54;G4VC56	G4VC55;Q1WL54;G4VC56
Smp_012410	G4VC49	n.a.
Smp_012440	Q26579	Q26579
Smp_012470	G4V969;A9NI52	G4V969;A9NI52
Smp_012580	n.a.	G4V979
Smp_012720	G4V9G1	G4V9G1
Smp_012750	G4V9G5	G4V9G5
Smp_012780	G4V9G7	G4V9G7
Smp_012800	G4V9G9	G4V9G9
Smp_012810	G4V9H0	G4V9H0
Smp_012900	G4V9I2	G4V9I2
Smp_012930	G4V9I5	G4V9I5
Smp_012980	G4VEX2	G4VEX2
Smp_013040	P91802;G4VEV6;G4VEV7	P91802;G4VEV6;G4VEV7
Smp_013070	G4VEW1;G4V957	n.a.
Smp_013150	G4M0L1	n.a.
Smp_013200	G4M0K4;G4M0K5	G4M0K4;G4M0K5
Smp_013300	G4VEH8;G4VEH9	n.a.
Smp_013460	G4VH48	G4VH48
Smp_013470	G4VH46;G4VH47	n.a.
Smp_013540	Q49QX8	n.a.
Smp_013690	G4V6A5	G4V6A5
Smp_013790	G4LVH2	G4LVH2
Smp_013840	G4LVH6;G4LVH5	G4LVH6;G4LVH5
Smp_013860	G4LVH9	G4LVH9
Smp_013970	G4LVI6	n.a.
Smp_014010	G4LVI8	G4LVI8
Smp_014170	G4V8S1;G4V8S0	G4V8S1;G4V8S0
Smp_014270	G4V8T2;G4VB03	n.a.
Smp_014570	n.a.	G4VBU3;G4VBU2
Smp_014620	G4VBU8	G4VBU8
Smp_014650	G4VBV1	G4VBV1
Smp_014660	Q26554;G4VBV4	Q26554;G4VBV4
Smp_014670	G4VBV5;G4VBV6	G4VBV6;G4VBV5
Smp_014780	G4VBW4;G4VBW5	G4VBW4;G4VBW5
Smp_014800	G4VBX0;G4VBX1	G4VBX0;G4VBX1
Smp_014850	G4VBX5	n.a.
Smp_015020	G4VGA5	G4VGA5
Smp_015050	n.a.	G4VGA7
Smp_015070	G4VGA9;G4VGB0	G4VGA9;G4VGB0
Smp_015090	G4VGB4	G4VGB4
Smp_015480	G4VSD1	G4VSD1
Smp_015520	G4VSD5	n.a.
Smp_015530	G4VSD8;G4VSD6;G4VSD7	G4VSD8;G4VSD6;G4VSD7
Smp_015690	G4VSL0	n.a.
Smp_015710	G4VSL5	G4VSL5
Smp_015720	G4VSL7	G4VSL7
Smp_015730	G4VSL8	G4VSL8
Smp_015860	G4VSN6	G4VSN6
Smp_015880	G4VSP0	G4VSP0
Smp_015920	n.a.	G4VJP0
Smp_015980	G4VJN6	G4VJN6
Smp_016050	G4V5E6	G4V5E6
Smp_016200	G4V5F5;G4V5F4;G4V5F6	G4V5F5;G4V5F4;G4V5F6
Smp_016250	G4VHE9;G4VHF0	n.a.
Smp_016410	G4VHG1	G4VHG1
Smp_016490	n.a.	G4VHH3;G4VHH4
Smp_016600	n.a.	G4VKW8
Smp_016630	Q8IT62	Q8IT62;G4VKX0
Smp_016670	G4VKX2	G4VKX2
Smp_016730	G4VKX8	n.a.
Smp_016780	G4VKY4	G4VKY4
Smp_016810	G4VKY7	n.a.
Smp_016840	G4VKZ2	n.a.
Smp_016870	G4VKZ6	n.a.
Smp_016880	G4VKZ7	G4VKZ7
Smp_016900	G4VKZ9	n.a.
Smp_016990	G4VTK7	n.a.
Smp_017010	G4VTK3;G4VTK5;G4VTK4	G4VTK3;G4VTK5;G4VTK4
Smp_017070	G4VTJ6;A9NI61	G4VTJ6;A9NI61
Smp_017090	G4VTJ0	n.a.
Smp_017230	G4VE80	G4VE80
Smp_017280	Q15ER5	n.a.
Smp_017290	G4VE86;G4VE85	G4VE86;G4VE85
Smp_017360	G4VE92;Q94757	G4VE92;Q94757
Smp_017430	P19331;G4LW70	P19331;G4LW70
Smp_017450	G4LW68	G4LW68
Smp_017640	G4VGY0	n.a.
Smp_017660	C1LZ83	C1LZ83
Smp_017710	G4VP59	G4VP59
Smp_017730	G4VP56;Q26607	Q26607;G4VP56
Smp_017750	G4VNP9	G4VNP9
Smp_017830	G4VNQ7;G4VNQ8;G4VNQ6	G4VNQ6;G4VNQ7;G4VNQ8
Smp_017880	n.a.	G4VNY1
Smp_017890	G4VNY2	n.a.
Smp_018020	G4VNZ5	G4VNZ5
Smp_018150	G4VP10	G4VP10
Smp_018160	G4VP11	n.a.
Smp_018240	G4M0P7;G4M0P8;G4M0P6	G4M0P7;G4M0P8;G4M0P6
Smp_018250	G4VGQ7;G4VGQ6	G4VGQ7;G4VGQ6
Smp_018260	G4VGQ5	G4VGQ5
Smp_018460	G4VGN6	n.a.
Smp_018530	G4VGM8;G4VGM9	G4VGM8;G4VGM9
Smp_018620	G4VGL9	G4VGL9
Smp_018680	G4VGL2	G4VGL2
Smp_018760	G4M039	G4M039
Smp_018890	P41759;G4VG20	P41759;G4VG20
Smp_018950	G4VG25	n.a.
Smp_018990	G4VG38	G4VG38
Smp_019010	G4VG40	G4VG40
Smp_019030	G4VG42;Q26563	G4VG42;Q26563
Smp_019050	G4VG45;G4VG46	G4VG45;G4VG46
Smp_019060	G4VG47	G4VG47
Smp_019100	G4LUE9	G4LUE9
Smp_019130	G4LUE4	n.a.
Smp_019280	n.a.	G4LUC8
Smp_019310	n.a.	G4LUC6
Smp_019350	G4LUC3	G4LUC3
Smp_019380	G4LUC1	G4LUC1
Smp_019430	G4LUB7	G4LUB7
Smp_019440	G4LUB6	G4LUB6
Smp_019490	G4LUA8;G4LUA9	G4LUA9;G4LUA8
Smp_019630	C4Q2I8	C4Q2I8
Smp_019640	C4Q2F2;C4Q2F3	C4Q2F2;C4Q2F3
Smp_019690	C4Q2F6	C4Q2F6
Smp_019730	C4Q2F8;C4Q2F9	C4Q2F8;C4Q2F9
Smp_019750	G4LYX7;G4LYX8	G4LYX7;G4LYX8
Smp_019840	G4LYZ5;G4LYZ4	n.a.
Smp_019890	G4V8G8	G4V8G8
Smp_019940	G4V8M3;G4V8M2;G4V8M4	G4V8M3
Smp_020040	G4V8G2;G4V8G1	G4V8G2;G4V8G1
Smp_020050	G4V8G0	G4V8G0
Smp_020060	G4V8F9	G4V8F9
Smp_020070	n.a.	G4V8F8
Smp_020090	G4V8F5	G4V8F5
Smp_020210	G4V8D3	n.a.
Smp_020220	G4V8D5;G4V8D6	G4V8D5;G4V8D6
Smp_020340	G4V8C4;G4V8C5	n.a.
Smp_020370	G4V8C2	G4V8C2
Smp_020450	G4V8B3	G4V8B3
Smp_020550	G4M010	G4M010
Smp_020590	G4LY90	n.a.
Smp_020770	G4LYA4	G4LYA4
Smp_020800	G4LYA2	G4LYA2
Smp_020920	G4VQD2;G4VQD3	G4VQD2;G4VQD3
Smp_021070	G4VDL0	n.a.
Smp_021080	G4VDK9	n.a.
Smp_021130	G4VDK3	n.a.
Smp_021140	G4VDK2	G4VDK2
Smp_021160	G4VDK0	n.a.
Smp_021170	G4VDJ9	G4VDJ9
Smp_021290	n.a.	G4V8H9
Smp_021330	G4V8H4	n.a.
Smp_021540	G4VNH1	n.a.
Smp_021600	G4VNG5	G4VNG5
Smp_021800	G4VDV2	G4VDV2
Smp_021910	G4VE11	G4VE11
Smp_021920	G4VE12;G4VE13	G4VE12;G4VE13
Smp_021950	G4VE17;G4VE16	n.a.
Smp_022090	G4VE33	G4VE33
Smp_022100	C4Q351	n.a.
Smp_022110	C4Q352	n.a.
Smp_022150	G4LWE0	G4LWE0
Smp_022170	G4M1N6	G4M1N6
Smp_022330	G4VPH9	G4VPH9
Smp_022340	n.a.	G4VPH8
Smp_022400	G4VPH5	G4VPH5
Smp_022410	G4VPH4	n.a.
Smp_022540	G4VP92	G4VP92
Smp_022560	G4VEA9;G4VEB0;G4VHI7	n.a.
Smp_022640	Q95043;G4V5V3;Q9GV95	n.a.
Smp_022660	G4VEB8	n.a.
Smp_022810	G4VQ12;G4VQ13	G4VQ12;G4VQ13
Smp_022850	G4VQ06	n.a.
Smp_022960	G4VN20	G4VN20
Smp_022990	G4VN15	G4VN15
Smp_023150	G4VCC1	n.a.
Smp_023160	G4VCC0	G4VCC0
Smp_023170	G4VCB9	G4VCB9
Smp_023230	G4VCB3	n.a.
Smp_023250	G4VCB1;G4VCB0	n.a.
Smp_023360	G4VFX6;G4VFX7	G4VFX6;G4VFX7
Smp_023530	G4VFS5	G4VFS5
Smp_023620	n.a.	G4VFT3
Smp_023660	G4VFT6	n.a.
Smp_023670	G4VFT7	n.a.
Smp_023700	G4VFT9;G4VFU0	n.a.
Smp_023860	G4VD26	n.a.
Smp_023940	n.a.	G4VD16
Smp_024030	G4VQ50	n.a.
Smp_024110	Q27877;G4VQ58	Q27877;G4VQ58
Smp_024120	O01374;G4VQ59	O01374;G4VQ59
Smp_024140	G4VQ62;G4VQ61;G4VQ63	G4VQ62;G4VQ61;G4VQ63
Smp_024150	G4VQ64	G4VQ64
Smp_024180	G4VQ69	n.a.
Smp_024220	G4VQ74	G4VQ74
Smp_024360	G4VQ88;G4VQ87	G4VQ88;G4VQ87
Smp_024380	G4VQG5	n.a.
Smp_024390	G4VQG8;G4VQG7;G4VQG6	G4VQG6;G4VQG8;G4VQG7
Smp_024500	G4V8R2;G4V8R3	n.a.
Smp_024520	G4VC26	G4VC26
Smp_024580	G4VIQ1;G4VIQ0	n.a.
Smp_024590	G4VIQ2	n.a.
Smp_024670	G4VIQ8;T1VYA5	n.a.
Smp_024780	G4VIS4;G4VIS3	n.a.
Smp_024810	n.a.	C4Q3U7
Smp_024820	C4Q3U8	C4Q3U8
Smp_024850	G4VMA5	n.a.
Smp_024870	G4VMA3	G4VMA3
Smp_024880	G4VMA1	G4VMA1
Smp_024900	G4VM99	n.a.
Smp_025010	G4VM90	G4VM90
Smp_025100	G4VPH0	G4VPH0
Smp_025130	G4VPG8	n.a.
Smp_025150	G4VPG6	G4VPG6
Smp_025160	G4VPG5;G4VPG3;O18501	G4VPG5;G4VPG3;O18501
Smp_025260	G4VPF4	G4VPF4
Smp_025510	G4VPD0	G4VPD0
Smp_025550	G4VPC6	n.a.
Smp_025560	G4VPC2	n.a.
Smp_025570	G4VPC1	n.a.
Smp_025680	G4VAX2	G4VAX2
Smp_025800	G4VAQ6	G4VAQ6
Smp_025830	Q32TF5;G4VAQ4	Q32TF5;G4VAQ4
Smp_025860	G4VAQ2	G4VAQ2
Smp_026090	G4VKQ2	n.a.
Smp_026190	G4VJW9	n.a.
Smp_026230	n.a.	G4VEZ6
Smp_026250	G4VEZ1;G4VEZ2;G4VEZ3	G4VEZ3;G4VEZ2;G4VEZ1
Smp_026310	G4VEY4	G4VEY4
Smp_026340	G4VEY1	n.a.
Smp_026400	G4VT60	n.a.
Smp_026420	G4VT56	G4VT56
Smp_026460	G4VT61	G4VT61
Smp_026510	G4VT52	G4VT52
Smp_026540	G4VT47	G4VT47
Smp_026560	E9LZR7;E9LZR8;G4VT44;G4VT45	E9LZR7;E9LZR8;G4VT44;G4VT45
Smp_026630	G4LX53	G4LX53
Smp_026770	G4VKW3	G4VKW3
Smp_026910	G4VFY8;G4VFY9	G4VFY8;G4VFY9
Smp_026930	G4VFZ1	n.a.
Smp_027360	G4VHB0	G4VHB0
Smp_027370	G4VHA9	G4VHA9
Smp_027480	G4VIB9	G4VIB9
Smp_027550	G4VIC7;G4VIC8	n.a.
Smp_027610	C4Q4Q6	C4Q4Q6
Smp_027750	G4M091	n.a.
Smp_027870	n.a.	C4Q4V9
Smp_027880	C4Q4W0	C4Q4W0
Smp_027890	C4Q4W5	n.a.
Smp_027900	C4Q4W6	n.a.
Smp_027910	C4Q4S4	C4Q4S4
Smp_027920	C4Q4S5	n.a.
Smp_027970	G4LU80	n.a.
Smp_028070	G4V630;G4V629	G4V630;G4V629
Smp_028100	G4V624;G4V625	G4V624;G4V625
Smp_028120	G4V622	G4V622
Smp_028170	G4V615;G4V614;G4V616	n.a.
Smp_028190	G4LWY0;I0B503	G4LWY0;I0B503
Smp_028200	G4LWY1	G4LWY1
Smp_028330	G4LWY7	G4LWY7
Smp_028340	G4LWY8	n.a.
Smp_028440	G4LX03;G4LX02	G4LX03;G4LX02
Smp_028670	n.a.	G4VP62;G4VP63
Smp_028730	G4VBF1	G4VBF1
Smp_028870	n.a.	G4VBD6
Smp_028930	G4M0U3	n.a.
Smp_028940	G4M0U2	n.a.
Smp_028990	G4VGS4;G4VGS3;G4VGS2	G4VGS4;G4VGS3;G4VGS2
Smp_029060	G4VGT4	G4VGT4
Smp_029100	G4VGT9;G4VGU0	G4VGT9;G4VGU0
Smp_029150	G4VGU5	n.a.
Smp_029230	G4VGV3	G4VGV3
Smp_029240	Q4PLC2;G4VGV6;G4VGV4	Q4PLC2;G4VGV4;G4VGV6
Smp_029310	G4LZU4	G4LZU4
Smp_029370	G4LWA9	n.a.
Smp_029390	G4LWA8	G4LWA8
Smp_029410	G4LWA6	G4LWA6
Smp_029470	G4LW94	G4LW94
Smp_029500	G4LW91	G4LW91
Smp_029730	G4VFH3	n.a.
Smp_029750	G4VFH7	n.a.
Smp_029780	G4VFI0	n.a.
Smp_029790	G4VFI1	n.a.
Smp_029800	n.a.	G4VFI2
Smp_029820	G4VFI4	G4VFI4
Smp_029890	G4VFI8	G4VFI8
Smp_029900	G4VFI9;G4VFJ0	n.a.
Smp_030000	G4VFK1;P91803;D6BNU4	P91803;G4VFK1;D6BNU4
Smp_030150	n.a.	G4VFM3
Smp_030180	G4VFM6	G4VFM6
Smp_030220	G4VFM9	G4VFM9
Smp_030280	G4VFN4	n.a.
Smp_030290	G4VFN5	G4VFN5
Smp_030300	G4VFN7;G4VFN9;Q9NHY5	G4VFN7;G4VFN9;Q9NHY5
Smp_030330	G4VFP3;G4VFP2	G4VFP3;G4VFP2
Smp_030370	n.a.	Q06814;C4Q5I7
Smp_030400	C4Q5J0	C4Q5J0
Smp_030500	C4Q5J8;C4Q5J9;Q5QEI6	C4Q5J8;C4Q5J9;Q5QEI6
Smp_030690	G4LW38	G4LW38
Smp_030710	G4LW36	n.a.
Smp_030730	G4LW34	G4LW34
Smp_030780	G4VLS2	n.a.
Smp_030830	G4VLS7;G4VLS8	G4VLS7;G4VLS8;B8Y6H1
Smp_030860	G4VLT2	n.a.
Smp_030920	G4VLU0;G4VLT9	G4VLU0;G4VLT9
Smp_031000	G4VPI8;G4VPI9;G4VPJ0	n.a.
Smp_031040	G4VPJ5;G4VPJ4	n.a.
Smp_031100	G4VPK3	G4VPK3
Smp_031270	G4VPM2	n.a.
Smp_031300	G4VPM6	G4VPM6
Smp_031310	G4VPM7	n.a.
Smp_031360	G4VPN1;G4VPN2	n.a.
Smp_031570	G4LUU2	n.a.
Smp_031710	G4VN60	G4VN60
Smp_031720	G4VN61	G4VN61
Smp_031730	G4VN62	G4VN62
Smp_031860	G4VN84	G4VN84
Smp_031880	C4Q5U5	C4Q5U5
Smp_031920	C4Q5Y4;C4Q5Y6;C4Q5Y7;C4Q5Y5;C4Q5Y3;C4Q5Y8	n.a.
Smp_031950	C4Q5Z2;C4Q5Z1	C4Q5Z1;C4Q5Z2
Smp_031990	G4LYL3	n.a.
Smp_032060	G4LYM0	n.a.
Smp_032150	G4LYN1	G4LYN1
Smp_032180	G4LYN4	G4LYN4
Smp_032230	G4LYN7	G4LYN7
Smp_032240	G4LYN8	n.a.
Smp_032250	G4LYN9	n.a.
Smp_032260	G4LYP0;Q15ET9	n.a.
Smp_032310	G4VSI1	G4VSI1
Smp_032320	G4VSH8	n.a.
Smp_032480	G4VSF7	n.a.
Smp_032490	G4VSF6	n.a.
Smp_032500	G4VSF5	n.a.
Smp_032510	G4VSF4	G4VSF4
Smp_032520	G4VSF3	G4VSF3
Smp_032580	G4VDG3;G4VDG2;G4VDG1	G4VDG3;G4VDG2;G4VDG1
Smp_032760	G4VDH7	G4VDH7
Smp_032780	G4VDI0	n.a.
Smp_032800	G4VDI3;G4VDI2	n.a.
Smp_032810	G4VDI4	G4VDI4
Smp_032820	G4VDI5;G4VDI6	n.a.
Smp_032950	G4VR84	n.a.
Smp_033020	G4VR92	n.a.
Smp_033040	G4VRF8	G4VRF8
Smp_033050	G4VRG0;G4VRF9;G4VRG1	n.a.
Smp_033260	G4M0W7;G4M0W8	n.a.
Smp_033330	G4M0V9	G4M0V9
Smp_033400	Q15EU2	Q15EU2
Smp_033530	G4VQT8	n.a.
Smp_033540	G4VQT7;Q26546	G4VQT7;Q26546
Smp_033550	G4VAL3	G4VAL3
Smp_033610	n.a.	G4LVB0
Smp_033660	G4LVB5	n.a.
Smp_033670	G4LVB6;G4LVC0;G4LVB9;G4LVB8;G4LVB7	G4LVB6;G4LVC0;G4LVB9;G4LVB8;G4LVB7
Smp_033680	G4LVC1	n.a.
Smp_033700	G4LVC5	n.a.
Smp_033710	G4LVC7;I6TRR3	G4LVC7;I6TRR3
Smp_033760	G4LVD1;G4LVD2	G4LVD1;G4LVD2
Smp_033770	G4LVD3	n.a.
Smp_033950	G4V9S7;G4V9S6;Q6UEH7	n.a.
Smp_033970	G4V9T2	G4V9T2
Smp_034190	G4VEF4;G4VEF3	G4VEF4;G4VEF3
Smp_034410	n.a.	Q26534;G4VBC3;G4VBC5;G4VBC4
Smp_034430	G4V920	n.a.
Smp_034490	G4V926	G4V926
Smp_034530	G4V933	n.a.
Smp_034550	G4V935	G4V935
Smp_034670	G4V949	G4V949
Smp_034700	G4V952;G4V953	G4V952;G4V953
Smp_034840	Q9U491;G4V8B1;G4V8A9	Q9U491;G4V8B1;G4V8A9
Smp_034850	n.a.	G4V846
Smp_034870	G4V844	G4V844
Smp_034920	G4V842	n.a.
Smp_034940	G4V838;G4V839;G4V840;O17460;O17459	G4V838;G4V839;G4V840;O17460;O17459
Smp_035030	G4V825	G4V825
Smp_035040	n.a.	G4V824
Smp_035090	G4V818;G4V819;G4V820	n.a.
Smp_035110	G4V816	n.a.
Smp_035200	G4V805;G4V804;G4V803;G4V806	G4V805;G4V804;G4V806;G4V803
Smp_035210	n.a.	G4V802
Smp_035220	G4V801	n.a.
Smp_035260	n.a.	G4V7Z9
Smp_035270	G4V7Z7;G4V7Z8	G4V7Z7;G4V7Z8
Smp_035280	G4V7Z6	n.a.
Smp_035300	G4V7Z3;G4V7Z4	G4V7Z3;G4V7Z4
Smp_035410	G4V7Y5	n.a.
Smp_035430	G4V7Y4;G4V7Y3	G4V7Y4;G4V7Y3
Smp_035470	G4V7R9	G4V7R9
Smp_035560	G4V7P2;G4V7P3	G4V7P2;G4V7P3
Smp_035580	G4V7P4	G4V7P4
Smp_035620	G4V7P7	n.a.
Smp_035700	n.a.	G4V7Q9
Smp_036090	G4VHU1	n.a.
Smp_036220	G4V6E9;C1M1H8;G4VL73	G4V6E9;C1M1H8;G4VL73
Smp_036270	G4V6F4;G4V6F5;G4V6F7;G4V6F6	G4V6F4;G4V6F5;G4V6F7;G4V6F6
Smp_036390	G4VLV1	n.a.
Smp_036400	G4VLV0;G4VLU9	G4VLU9;G4VLV0
Smp_036570	G4VQF9	n.a.
Smp_036590	G4VQG0	n.a.
Smp_036930	G4M1B3	n.a.
Smp_036950	G4M1B6	G4M1B6
Smp_036990	G4LV14	G4LV14
Smp_037120	G4VRH7	n.a.
Smp_037190	G4VRG8	G4VRG8
Smp_037230	Q26574;G4LXR0	Q26574;G4LXR0
Smp_037290	G4LUM3;Q15ER4	n.a.
Smp_037400	G4VRQ5	n.a.
Smp_037460	G4VE54;G4VE53	n.a.
Smp_037530	Q58HK3;G4VE60	Q58HK3;G4VE60
Smp_037540	G4VE62;B9P3Q8;G4VE61	G4VE62;B9P3Q8;G4VE61
Smp_037590	G4VE68	n.a.
Smp_037640	G4VE73	G4VE73
Smp_037700	Q15ES0	Q15ES0
Smp_037860	G4V654	G4V654
Smp_037910	G4V6D5	G4V6D5
Smp_038030	Q8WRD5;G4VQX9;Q8WRD6	Q8WRD5;G4VQX9;Q8WRD6
Smp_038080	G4VHN1	G4VHN1
Smp_038100	G4VHN3	G4VHN3
Smp_038210	G4VNS9	G4VNS9
Smp_038240	G4VNT2	G4VNT2
Smp_038420	G4VNV0	G4VNV0
Smp_038510	G4VTG3;G4VTG4	n.a.
Smp_038560	G4VNJ7;G4VNJ8;G4VNJ6;G4VNJ4;G4VNJ5;G4VNJ3	n.a.
Smp_038640	G4VI92	n.a.
Smp_038680	G4VI89	G4VI89
Smp_038730	G4VI80;G4VI78;G4VI77;G4VI79;G4VI76;G4VI75	G4VI80;G4VI78;G4VI77;G4VI79;G4VI76;G4VI75
Smp_038870	G4LUK8;G4LUK7	G4LUK7;G4LUK8
Smp_038940	G4VQZ6	n.a.
Smp_038950	G4VQZ5	G4VQZ5
Smp_038960	G4VQZ4	G4VQZ4
Smp_038980	G4VQZ3;G4VQZ2	n.a.
Smp_039000	G4LWT1	G4LWT1
Smp_039080	G4LWS6	n.a.
Smp_039180	C4Q7T4	C4Q7T4
Smp_039390	G4VDD3	n.a.
Smp_039400	G4VDD2	G4VDD2
Smp_039490	G4VKF3;G4VKF1;G4VKF2	G4VKF3;G4VKF1;G4VKF2
Smp_039820	G4VSJ0	n.a.
Smp_040080	G4VKI4	G4VKI4
Smp_040100	G4VKI7	n.a.
Smp_040130	Q26565;G4VKJ0	Q26565;G4VKJ0
Smp_040450	G4VGK2	n.a.
Smp_040460	G4VB52	n.a.
Smp_040500	G4VB57	G4VB57
Smp_040540	G4VB63	G4VB63
Smp_040560	G4VB67	n.a.
Smp_040570	G4VB69;G4VB68	G4VB69;G4VB68
Smp_040680	G4VB75;G4VB73;A0A146MG81	n.a.
Smp_040770	G4VFQ2	G4VFQ2
Smp_040790	G4VFQ0;Q26551	G4VFQ0;Q26551
Smp_040800	G4VFP9	G4VFP9
Smp_040970	G4V7J7;G4V7J8	G4V7J7;G4V7J8;G4V7J9
Smp_041060	S5XLH6;G4V7S6	S5XLH6;G4V7S6
Smp_041370	G4LWV6	G4LWV6
Smp_041430	G4LWW0	G4LWW0
Smp_041450	G4LWW1	G4LWW1
Smp_041460	G4LWW2	G4LWW2
Smp_041480	G4LWW5;G4LWW6;G4LWW7	G4LWW7;G4LWW5;G4LWW6
Smp_041500	G4LWW9	n.a.
Smp_041550	G4LWX6	G4LWX6
Smp_041600	G4VMZ5	G4VMZ5
Smp_041630	G4VMZ7	n.a.
Smp_041650	G4VN01	n.a.
Smp_041740	G4VJP7	G4VJP7
Smp_041770	G4VJQ1	n.a.
Smp_041980	G4VJS1	G4VJS1
Smp_042020	n.a.	Q7YTA4
Smp_042030	G4VJS4	n.a.
Smp_042050	G4VJS6	n.a.
Smp_042060	n.a.	G4VJS7
Smp_042090	G4VJT2;G4VJT1	G4VJT2;G4VJT1
Smp_042110	G4VJT4	G4VJT4
Smp_042150	n.a.	G4VJT8;A0A223A3K1
Smp_042160	P53442;G4VJT9;G4VJU0	P53442;G4VJT9;G4VJU0
Smp_042210	G4VJU5	n.a.
Smp_042270	A9NI54;G4M0R9;G4M0S0;G4M0S1;A9NI55	G4M0S0;A9NI54;G4M0R9;G4M0S1;A9NI55
Smp_042300	Q9NGC4;G4M0R5	Q9NGC4;G4M0R5
Smp_042390	G4VJE6	n.a.
Smp_042400	G4VJE7	G4VJE7
Smp_042430	G4VJF0;G4VJF1	n.a.
Smp_042530	G4VRE4	n.a.
Smp_042550	G4VRE2	G4VRE2
Smp_042560	G4VRE1	G4VRE1
Smp_042590	G4VRD8;G4VRD9	G4VRD8;G4VRD9
Smp_042650	G4VRD4	n.a.
Smp_042670	G4VFX1;G4VFX2	n.a.
Smp_042680	G4VFX0;Q15ER8	G4VFX0;Q15ER8
Smp_042790	Q9GYZ1;G4VIT8	Q9GYZ1;G4VIT8
Smp_043030	Q26609;G4VIV9	Q26609;G4VIV9
Smp_043070	G4VIW3	n.a.
Smp_043100	G4VIW7	G4VIW7
Smp_043120	G4VIW9	G4VIW9
Smp_043150	Q04702	Q04702
Smp_043170	G4VIX4	n.a.
Smp_043200	G4VIX6	n.a.
Smp_043210	n.a.	G4VIX7
Smp_043350	G4VIY9	G4VIY9
Smp_043390	n.a.	G4VRX3
Smp_043620	G4VKA2	G4VKA2
Smp_043670	G4VKA6;G4VKA5;Q27778	G4VKA6;G4VKA5;Q27778
Smp_043940	G4M0T5;G4M0T4	G4M0T5;G4M0T4
Smp_043970	G4M0T7	G4M0T7
Smp_043990	G4VD41;G4VD40;G4VD39	G4VD41;G4VD40;G4VD39
Smp_044000	G4VD38	n.a.
Smp_044010	n.a.	P42637;G4VD36
Smp_044060	n.a.	G4VD32
Smp_044280	G4VDA4;G4VDA3	n.a.
Smp_044400	G4VDB4	n.a.
Smp_044440	G4VR32	G4VR32
Smp_044550	G4VQS9;G4VQS4;G4VQS7;G4VQS5;G4VQS6;G4VQS8	G4VQS4;G4VQS7;G4VQS5;G4VQS6;G4VQS8;G4VQS9;G4VQT0
Smp_044580	G4VQR9	G4VQR9
Smp_044680	G4LY51	G4LY51
Smp_044690	G4VK90	n.a.
Smp_044810	G4VBK2	n.a.
Smp_044850	G4VBK5	n.a.
Smp_044920	C4Q9B4	C4Q9B4
Smp_044970	G4VRR2	G4VRR2
Smp_045010	G4VR24	G4VR24
Smp_045060	G4VQU7	G4VQU7
Smp_045070	G4VQU8	n.a.
Smp_045200	P14202	P14202
Smp_045220	G4VBS3	G4VBS3
Smp_045250	G4VBS1	n.a.
Smp_045300	n.a.	G4VBR8
Smp_045400	G4LXQ5	G4LXQ5
Smp_045500	G4VI66	G4VI66
Smp_045510	Q2VU48	Q2VU48
Smp_045550	n.a.	G4VI63
Smp_045560	G4VI62	G4VI62
Smp_045590	G4VK74	n.a.
Smp_045610	G4VK76	G4VK76
Smp_045620	G4VK78;G4VK77	n.a.
Smp_045650	G4VK81	n.a.
Smp_045710	G4VK88;G4VK89	G4VK88;G4VK89
Smp_045730	G4LX43	n.a.
Smp_045750	G4VPH1;G4VPH2	n.a.
Smp_045760	G4VPP1	n.a.
Smp_045780	G4VPP3	G4VPP3
Smp_045810	G4VPP6;G4VPP7	G4VPP6;G4VPP7
Smp_045940	G4VPQ8	G4VPQ8
Smp_045950	G4VPQ9;G4VPR1;G4VPR0	G4VPQ9;G4VPR1;G4VPR0
Smp_045980	G4VPR4	n.a.
Smp_046020	G4VPR7;Q3ZFF6	G4VPR7;Q3ZFF6
Smp_046030	G4VPR8	n.a.
Smp_046060	G4VPS3;G4VPS2	G4VPS3;G4VPS2
Smp_046090	G4VPS5;G4VPS6	G4VPS5;G4VPS6
Smp_046100	G4VPS8	G4VPS8
Smp_046140	G4VPT2	G4VPT2
Smp_046160	G4VPT3	G4VPT3
Smp_046250	n.a.	G4VE02
Smp_046280	G4VKS9;G4VKS8	n.a.
Smp_046290	G4VKT0	G4VKT0
Smp_046500	G4VLV5;G4VLV4	n.a.
Smp_046550	G4VLV8	n.a.
Smp_046600	P53470;G4VLW2	P53470;G4VLW2
Smp_046630	n.a.	G4VLW5
Smp_046740	G4VCN8	G4VCN8
Smp_046750	G4VCN7	n.a.
Smp_046800	G4VCN1;G4VCN0	G4VCN1;G4VCN0
Smp_046930	G4VCM2	n.a.
Smp_046980	G4VNB2	n.a.
Smp_047060	G4VNA0;G4VN99	G4VNA0
Smp_047200	G4VN87	n.a.
Smp_047320	G4VNC3	n.a.
Smp_047360	G4VBJ1;G4VBJ2	G4VBJ1;G4VBJ2
Smp_047370	G4VBJ0	G4VBJ0
Smp_047400	G4VBI8	n.a.
Smp_047450	G4VBI3	G4VBI3
Smp_047610	G4VBH0	n.a.
Smp_047650	P25320;G4VBG6	P25320;G4VBG6
Smp_047660	G4VBG5;G4VBG4	G4VBG5
Smp_047680	n.a.	G4VBG4
Smp_047700	G4VBG2	G4VBG2
Smp_047740	G4M1T7	G4M1T7
Smp_047900	n.a.	G4VDM4
Smp_048230	G4V8W2	G4V8W2
Smp_048240	G4V8W3	G4V8W3
Smp_048260	G4V8W8;G4V8W9	n.a.
Smp_048430	Q962Y6;G4V8J4	Q962Y6;G4V8J4
Smp_048550	G4VSB8	G4VSB8
Smp_048560	n.a.	G4VSB7;B1AAM6
Smp_048620	G4VSB0	n.a.
Smp_048650	G4VSA6	G4VSA6
Smp_048660	G4VSA5	n.a.
Smp_048690	G4VJ70	n.a.
Smp_048760	G4VBY2;G4VBY1	G4VBY2;G4VBY1
Smp_048830	G4VBY8	G4VBY8
Smp_048870	G4VBZ2	G4VBZ2
Smp_048880	G4VBZ3	G4VBZ3
Smp_048930	G4VBZ7	n.a.
Smp_048940	G4VBZ8	G4VBZ8
Smp_049010	G4VC04	G4VC04
Smp_049150	G4VC15	G4VC15
Smp_049170	G4VC17	G4VC17
Smp_049250	G4V8X7;P12812;A0A0R5RJC3;G4V8Y7	G4V8X7
Smp_049270	G4V8X9	G4V8X9
Smp_049300	n.a.	G4V8Y7;G4V8Y2
Smp_049390	n.a.	G4V8Z5
Smp_049500	G4V904	G4V904
Smp_049520	G4V906;Q26544	G4V906;Q26544
Smp_049550	G4V910	G4V910
Smp_049600	G4V985;G4V984;G4V986;G4V983	G4V986;G4V985;G4V984;G4V983
Smp_049880	G4LWN8	n.a.
Smp_049920	G4LWN2;G4LWN3	n.a.
Smp_049970	G4LWM5;G4LWM7;G4LWM6	n.a.
Smp_049990	G4LWM4	G4LWM4
Smp_050080	G4LWL6	G4LWL6
Smp_050130	G4LWL3	n.a.
Smp_050220	n.a.	G4LWK6
Smp_050250	G4LWK3	G4LWK3
Smp_050280	G4LWK0	G4LWK0
Smp_050350	G4LWI9;G4LWI7;G4LWI8;G4LWI6	G4LWI9;G4LWI7;G4LWI8;G4LWI6
Smp_050390	G4LWI3	G4LWI3
Smp_050470	G4VH94	n.a.
Smp_050540	G4VH85	n.a.
Smp_050570	G4VIC9	G4VIC9
Smp_050590	G4VHI6	n.a.
Smp_050630	G4VI98	G4VI98
Smp_050640	G4VI99	G4VI99
Smp_050700	G4VIA3	n.a.
Smp_050730	G4VIA5	G4VIA5
Smp_050820	G4VIB2	n.a.
Smp_050830	n.a.	G4VIB3
Smp_050880	G4VMI8	G4VMI8
Smp_050890	G4VMI9	G4VMI9
Smp_050920	G4VMJ2	n.a.
Smp_050940	G4VMJ5;G4VMJ4	G4VMJ5;G4VMJ4
Smp_051010	G4VKQ8	n.a.
Smp_051080	G4VKR5	G4VKR5
Smp_051210	G4LY37;G4LY38	G4LY37;G4LY38
Smp_051220	G4LY35	n.a.
Smp_051230	G4LY33;G4LY31;G4LY34;G4LY32	G4LY32;G4LY33;G4LY31;G4LY34
Smp_051260	G4LY29	n.a.
Smp_051280	G4LY27	n.a.
Smp_051290	G4LY24	n.a.
Smp_051300	G4LY23	n.a.
Smp_051320	G4LY21	G4LY21
Smp_051360	G4LXZ9;G4LY00	G4LXZ9;G4LY00
Smp_051390	G4LY02	G4LY02
Smp_051400	n.a.	G4LY04
Smp_051530	C4QB35	C4QB35
Smp_051550	G4M1K6	G4M1K6
Smp_051990	n.a.	G4VI28
Smp_052060	G4VI16	G4VI16
Smp_052230	G4VI02	G4VI02
Smp_052250	n.a.	G4VHZ9
Smp_052280	G4VHZ6;G4VHZ7	n.a.
Smp_052390	G4VF05	n.a.
Smp_052470	G4VHP2;G4VHP3	n.a.
Smp_052560	G4LYW5	G4LYW5
Smp_052740	G4VM36	G4VM36
Smp_052810	G4VAM6	G4VAM6
Smp_052870	G4VGE8	G4VGE8
Smp_052890	G4VGF1	n.a.
Smp_052910	G4VGF4	G4VGF4
Smp_053030	G4VK07	G4VK07
Smp_053040	G4VK08	G4VK08
Smp_053130	G4LXT2	G4LXT2
Smp_053190	G4LXS3	n.a.
Smp_053220	G4LXS1;G4LXS0	G4LXS1;G4LXS0
Smp_053230	G4LXR9	G4LXR9
Smp_053300	C4QBN1;Q9GSS8;G4LXZ8	n.a.
Smp_053420	G4VRK9	G4VRK9
Smp_053470	G4VRK3	n.a.
Smp_053510	G4VJ11;G4VJ12	G4VJ11;G4VJ12
Smp_053560	G4VJ06	G4VJ06
Smp_053610	G4VIZ9	G4VIZ9
Smp_053700	G4VIZ2	G4VIZ2
Smp_053820	G4VHS1	n.a.
Smp_053830	G4VHS0	G4VHS0
Smp_053900	G4VHP9	G4VHP9
Smp_053940	G4VHQ4	G4VHQ4
Smp_053990	G4VHQ8	n.a.
Smp_054160	P09792	P09792
Smp_054200	G4LYK7	G4LYK7
Smp_054220	G4LYK6	G4LYK6
Smp_054240	Q95WA2;G4LYK4	Q95WA2;G4LYK4
Smp_054340	G4VQK2;G4VQK1;G4VQK0	G4VQK2;G4VQK1;G4VQK0
Smp_054360	G4VQJ4	G4VQJ4
Smp_054410	G4VQJ3	G4VQJ3
Smp_054470	Q6B963	n.a.
Smp_054540	G4VQH7	G4VQH7
Smp_054560	G4VQH5	n.a.
Smp_054610	G4M165	n.a.
Smp_054730	G4V7T9	n.a.
Smp_054740	G4V7U0	n.a.
Smp_054750	G4V7U1	n.a.
Smp_054780	G4V7U3	G4V7U3
Smp_054790	G4V7U4;G4V7U5	G4V7U5;G4V7U4
Smp_054800	G4V7U6	G4V7U6
Smp_054840	G4V7V0	n.a.
Smp_055050	G4VH80	G4VH80
Smp_055200	G4VH66	G4VH66
Smp_055210	G4VH65	G4VH65
Smp_055220	n.a.	G4VH63;G4VH64
Smp_055400	G4V5V7	G4V5V7
Smp_055450	G4V5W4	G4V5W4
Smp_055600	n.a.	O17458;C4QC83
Smp_055670	G4VHJ2	G4VHJ2
Smp_055720	G4VHJ9;G4VHJ8;G4VHJ7	n.a.
Smp_055760	G4VHK2	G4VHK2
Smp_055780	n.a.	G4VHK5;Q26599
Smp_055870	Q26586	Q26586
Smp_055880	C4QCA0;C4QCA1	C4QCA0;C4QCA1
Smp_055890	C4QCA2	n.a.
Smp_055960	G4VB90	G4VB90
Smp_055990	C4QCD2	C4QCD2
Smp_056200	G4V5Y0	G4V5Y0
Smp_056280	G4V5Y8	n.a.
Smp_056350	G4VSY6	n.a.
Smp_056360	G4VSY1;G4VSY2;G4VSY3;G4VSY4;G4VSY5	G4VSY1;G4VSY2;G4VSY3;G4VSY0;G4VSX9;G4VSY4;G4VSY5
Smp_056370	G4VSX8	G4VSX8
Smp_056440	G4VSQ5	G4VSQ5
Smp_056500	G4LYE6	G4LYE6
Smp_056640	G4VH57	n.a.
Smp_056700	G4LYD2	n.a.
Smp_056760	G4LYC3;Q26593	G4LYC3;Q26593
Smp_056780	Q15ET8	Q15ET8
Smp_056810	G4LYB8;G4LYB6;G4LYB7	G4LYB8;G4LYB6;G4LYB7
Smp_056860	G4M1E4	n.a.
Smp_056890	G4M1E1	G4M1E1
Smp_056900	G4M1E0	n.a.
Smp_056970	P20287;G4V5I2;G4V5I1;G4V5I3;G4V5I4	P20287;G4V5I2;G4V5I1;G4V5I3;G4V5I4
Smp_056990	G4V5I7	G4V5I7
Smp_057060	G4V5J1	n.a.
Smp_057320	G4VMW9	G4VMW9
Smp_057410	n.a.	G4VMW3
Smp_057530	n.a.	G4VMV1
Smp_057650	G4M074	G4M074
Smp_057720	C4QCX0	n.a.
Smp_058140	G4VK43;G4VK42;G4VK44;G4VK45	G4VK43;G4VK42;G4VK44;G4VK45
Smp_058150	G4VK46	G4VK46
Smp_058160	G4VK47	n.a.
Smp_058170	G4VNN2;G4VNN1	G4VNN2;G4VNN1
Smp_058240	G4VNM5	G4VNM5
Smp_058320	G4VNL6	G4VNL6
Smp_058400	G4VNK6	n.a.
Smp_058410	G4LX86	n.a.
Smp_058460	G4LX81	G4LX81
Smp_058650	G4LX66	G4LX66
Smp_058680	G4LX62;G4LX63	n.a.
Smp_058690	Q00277;G4LX61;G4LX59;Q7M448	Q00277;G4LX61;G4LX59;Q7M448
Smp_058720	G4LX57	G4LX57
Smp_058880	G4VJ30	n.a.
Smp_058980	G4VJ23;G4VJ22	G4VJ23;G4VJ22
Smp_058990	G4VJ21	n.a.
Smp_059090	G4VJ34	n.a.
Smp_059150	G4VJ43	G4VJ43
Smp_059170	n.a.	G4VJ46;G4VJ45
Smp_059240	C4QDB5	n.a.
Smp_059290	G4VR74;G4VR73	G4VR74;G4VR73
Smp_059340	P30669;C4QDC7;C4QDC6;C4QDC8	n.a.
Smp_059350	C4QDC9	C4QDC9
Smp_059360	C4QDD1	n.a.
Smp_059480	O97161;G4VKD9	O97161;G4VKD9
Smp_059530	n.a.	G4LW52;G4LW53
Smp_059540	G4VKV4	G4VKV4
Smp_059660	G4VMD5	G4VMD5
Smp_059670	G4VMD6	G4VMD6
Smp_059710	G4VME0	G4VME0
Smp_059750	G4M0Y5;G4M0Y6	G4M0Y5;G4M0Y6
Smp_059780	n.a.	G4V9A7
Smp_059790	G4V9A5;G4V9A6	G4V9A5;G4V9A6
Smp_059810	G4V9A3	n.a.
Smp_059910	G4VT19;G4VT18;G4VT20	n.a.
Smp_059930	G4VT15	G4VT15
Smp_059980	Q6WVP6	Q6WVP6
Smp_060010	G4VAK6	G4VAK6
Smp_060070	G4VAK1	G4VAK1
Smp_060090	G4VAJ9	G4VAJ9
Smp_060170	G4VQN0	n.a.
Smp_060180	G4VQM9	n.a.
Smp_060190	G4VQM1;G4VQM0;G4VQL9;G4VQL8	n.a.
Smp_060270	G4VQM4	n.a.
Smp_060420	G4VJY2;G4VJY4;G4VJY3;G4VJY5	G4VJY2;G4VJY4;G4VJY3;G4VJY5
Smp_060620	G4V6H8	n.a.
Smp_060820	G4VBN6	G4VBN6
Smp_060860	G4VBP0	n.a.
Smp_060900	G4VBP5;G4VBP4	n.a.
Smp_060910	G4VBP6	G4VBP6
Smp_060940	G4VBP9;G4VBQ0	n.a.
Smp_060950	G4VBQ1	G4VBQ1
Smp_061040	G4VSQ0	G4VSQ0
Smp_061200	G4LY60	n.a.
Smp_061230	G4LY63	G4LY63
Smp_061510	G4VKK7	n.a.
Smp_061560	G4VKK3	n.a.
Smp_061590	C4QDY7;C4QDY6	C4QDY7;C4QDY6
Smp_061650	G4LUP0	G4LUP0
Smp_061840	G4VNI5	n.a.
Smp_061870	G4VNI0	G4VNI0
Smp_061920	G4VNE9;A9CBJ4	G4VNE9;A9CBJ4
Smp_061940	G4VNE5;G4VNE6	G4VNE5;G4VNE6
Smp_061950	G4VNE3;Q2VLG8;G4VNE4	n.a.
Smp_062070	G4LZN7;G4LZN8	G4LZN7;G4LZN8
Smp_062080	G4LZN6	n.a.
Smp_062120	G4LZN2	G4LZN2
Smp_062250	Q26572	Q26572
Smp_062260	G4LVP0;G4LVN9	G4LVP0;G4LVN9
Smp_062420	G4VJJ1;G4VJJ2;G4VJJ0	G4VJJ1;G4VJJ2;G4VJJ0
Smp_062510	G4VJJ8;G4VJJ9	G4VJJ9;G4VJJ8
Smp_062520	G4VJK0	G4VJK0
Smp_062630	G4VJL0	G4VJL0
Smp_062640	G4VJL1	n.a.
Smp_062720	G4VSE3;G4VSE2;G4VSE1;G4VS80	G4VSE3;G4VSE2;G4VSE1;G4VS80
Smp_062790	G4VA96	G4VA96
Smp_062830	G4VA94	G4VA94
Smp_062920	n.a.	G4M1G3
Smp_062950	G4M1G7	G4M1G7
Smp_062970	G4LXV4	n.a.
Smp_062980	G4LXV5	n.a.
Smp_063040	G4LXV8	G4LXV8
Smp_063090	G4VMI0	G4VMI0
Smp_063110	G4VMH7;G4VMH8	G4VMH8;G4VMH7
Smp_063120	G4VMH6	G4VMH6
Smp_063180	G4VMH2	G4VMH2
Smp_063230	G4VF95	G4VF95
Smp_063250	G4VF91	n.a.
Smp_063300	Q15ET2	n.a.
Smp_063330	n.a.	G4VF83
Smp_063350	G4VF81	n.a.
Smp_063420	G4VF75	G4VF75
Smp_063480	G4VF70	n.a.
Smp_063490	G4VF69	n.a.
Smp_063520	G4VA00	n.a.
Smp_063530	G4VA01;G4VA02	G4VA01;G4VA02
Smp_063560	G4VA05	n.a.
Smp_063630	G4VA11	n.a.
Smp_063640	G4VA12	G4VA12
Smp_063650	G4VA14;G4VA13	n.a.
Smp_063670	G4VA17	G4VA17
Smp_063760	G4VCA1	n.a.
Smp_063830	G4M0Y0	G4M0Y0
Smp_064020	G4VIN4;G4VIN6;G4VIN5;G4VIN3	n.a.
Smp_064040	G4VIN0;G4VIN1	G4VIN1;G4VIN0
Smp_064050	G4VIM8;G4VIM9	G4VIM8
Smp_064150	G4VCL1	n.a.
Smp_064200	G4V759	n.a.
Smp_064240	n.a.	G4V755
Smp_064320	G4VKD5;G4VKD4	G4VKD4;G4VKD5
Smp_064360	G4VKD0	G4VKD0
Smp_064380	G4VKC8	G4VKC8
Smp_064390	G4VKC7	n.a.
Smp_064430	G4VKC4	G4VKC4
Smp_064520	G4VKB5	n.a.
Smp_064530	G4VKB4	G4VKB4
Smp_064590	G4VNH9;G4VNH8	G4VNH9
Smp_064600	G4VNQ9	n.a.
Smp_064640	G4VNR3	n.a.
Smp_064650	G4VNR4	n.a.
Smp_064750	G4VQ30;G4VQ31	G4VQ30;G4VQ31
Smp_064860	G4VPU9	G4VPU9
Smp_064870	G4VPU8	G4VPU8
Smp_064950	n.a.	Q9NFN1;G4VPT6
Smp_065060	G4VCQ7	G4VCQ7
Smp_065110	G4VCR1	G4VCR1
Smp_065120	G4VCR2	n.a.
Smp_065180	G4VCS0	G4VCS0
Smp_065190	G4VCS1	G4VCS1
Smp_065210	n.a.	G4VCS4;G4VCS5;G4VCS6
Smp_065280	G4VCT1	G4VCT1
Smp_065290	n.a.	G4VCT2
Smp_065420	G4VCU3	n.a.
Smp_065470	G4VAF7;G4VAF6;G4VAF8	G4VAF7;G4VAF6;G4VAF8
Smp_065580	G4VAG6;G4VAG8;G4VAG7;G4VAG9;G4VAH0	G4VAG6;G4VAG8;G4VAG7;G4VAG9;G4VAH0
Smp_065610	G4VAI0;G4VAH9	G4VAI0;G4VAH9
Smp_065650	n.a.	G4VAI3
Smp_065780	G4VPB5	n.a.
Smp_065840	G4VPA9	n.a.
Smp_065890	G4VPA5	G4VPA5
Smp_065980	G4VP35	G4VP35
Smp_066010	G4VP31;G4VP32	G4VP31;G4VP32
Smp_066260	G4VDZ2	n.a.
Smp_066290	G4VGG6	n.a.
Smp_066340	G4VGG1;G4VGG0	G4VGG1;G4VGG0
Smp_066410	G4LZ03	G4LZ03
Smp_066480	G4LV29	n.a.
Smp_066590	G4VM11	G4VM11
Smp_066610	G4LVF8	G4LVF8
Smp_066620	G4LVF9	n.a.
Smp_066630	G4LVG1;G4LVG0	G4LVG1;G4LVG0
Smp_066670	G4LVG4	G4LVG4
Smp_066740	G4LVG9	n.a.
Smp_066760	G4VND1;G4VND2;G4VND0	G4VND1;G4VND2;G4VND0
Smp_066890	G4VIL3	G4VIL3
Smp_066940	G4VIK8	G4VIK8
Smp_066950	G4VIK7	G4VIK7
Smp_066990	Q15EU0;O17454	Q15EU0;O17454
Smp_067000	n.a.	G4VIJ4;G4VIJ5;G4VIJ6;G4VIJ7;G4VIJ8
Smp_067060	n.a.	Q8MNY1;G4V5C2
Smp_067140	G4V6R4	G4V6R4
Smp_067250	G4V9P7	n.a.
Smp_067260	G4V9P8	n.a.
Smp_067280	G4V9Q0	G4V9Q0
Smp_067400	G4LZ82	n.a.
Smp_067420	G4LZ80	n.a.
Smp_067480	G4LZ73;G4LZ74;G4LZ75	G4LZ73;G4LZ74;G4LZ75
Smp_067490	G4LZ72	n.a.
Smp_067540	G4VQC1	G4VQC1
Smp_067810	G4VHW4	G4VHW4
Smp_067890	G4LZY3	G4LZY3
Smp_067900	G4LZY4	G4LZY4
Smp_067930	G4LZY7	n.a.
Smp_067980	G4LZZ5;G4LZZ6;G4LZZ4;G4LZZ7;G4LZZ8	G4LZZ5;G4LZZ6;G4LZZ4;G4LZZ7;G4LZZ8
Smp_068060	G4V6P6	G4V6P6
Smp_068070	G4V6P7	G4V6P7
Smp_068080	G4V6P8	n.a.
Smp_068090	G4V6P9	n.a.
Smp_068100	G4V6Q1	n.a.
Smp_068170	G4V9Y0	G4V9Y0
Smp_068250	G4VTC3	n.a.
Smp_068420	Q4JHT3	Q4JHT3
Smp_068440	G4VBD5;I6TMT9	G4VBD5;I6TMT9
Smp_068480	n.a.	G4VQK4
Smp_068510	n.a.	G4VM55
Smp_068530	n.a.	G4VM57
Smp_068720	G4LWR6;C0MP97	G4LWR6;C0MP97
Smp_068780	G4VCQ5;Q9BPL0	n.a.
Smp_068840	G4VQ39	n.a.
Smp_068920	G4VQ99	n.a.
Smp_068950	G4VQA1;Q9GSS9	n.a.
Smp_069120	n.a.	G4LZR2
Smp_069130	C4QFX9;C4QFY0	C4QFX9;C4QFY0
Smp_069160	G4VIP0;G4VIN9	n.a.
Smp_069670	G4LVX7	G4LVX7
Smp_069760	G4VK52	n.a.
Smp_069770	G4VK53	G4VK53
Smp_069840	G4VK61	n.a.
Smp_069870	G4VK63	G4VK63
Smp_069880	G4VK64	G4VK64
Smp_069910	G4VK67	n.a.
Smp_069960	G4LXM5	G4LXM5
Smp_070020	G4VJC6	G4VJC6
Smp_070110	G4VJC0	n.a.
Smp_070200	G4VJB4	n.a.
Smp_070240	n.a.	Q1WMM8;G4VMG6
Smp_070330	G4VTA1	G4VTA1
Smp_070340	G4VTA0	n.a.
Smp_070380	G4VT95	G4VT95
Smp_070390	n.a.	G4V9Y1
Smp_070600	G4LZK0	G4LZK0
Smp_070630	n.a.	G4LZJ4
Smp_070640	n.a.	G4LZJ3
Smp_070690	G4VEL1	n.a.
Smp_070710	G4VEL6	G4VEL6
Smp_070770	G4VEM0	n.a.
Smp_070780	G4VEM1	G4VEM1
Smp_070920	G4M184	G4M184
Smp_070930	G4M183	G4M183
Smp_071140	G4V7X9	G4V7X9
Smp_071150	G4V7Y0	G4V7Y0
Smp_071250	G4VFV4	G4VFV4
Smp_071390	P25824;G4V9S0	G4V9S0;P25824
Smp_071520	G4V9J7	G4V9J7
Smp_071610	G4VRT6	G4VRT6
Smp_071630	G4VRU0	G4VRU0
Smp_071640	G4VRU2;G4VRU1	G4VRU2;G4VRU1
Smp_071840	G4VCY4	G4VCY4
Smp_071960	G4M0B9;G4M0B8	G4M0B9;G4M0B8
Smp_072100	G4M0A1	n.a.
Smp_072110	G4M099;G4M0A0	n.a.
Smp_072140	Q8I8A1;G4V9A8;G4VBR2	Q8I8A1;G4V9A8;G4VBR2
Smp_072190	O96368	O96368
Smp_072330	G4V9B9;Q26582	G4V9B9;G4V9B8;Q26582
Smp_072340	G4V9B5;A9NI60	G4V9B5;A9NI60
Smp_072350	G4V9B4	n.a.
Smp_072360	G4V9B3	n.a.
Smp_072370	G4V9B2	n.a.
Smp_072380	G4V9B1	G4V9B1
Smp_072560	G4VA38	n.a.
Smp_072640	n.a.	B2CNV1;G4LXX8
Smp_072790	G4LVZ9;G4LVZ8	n.a.
Smp_072870	G4LW08	G4LW08
Smp_072900	G4LW12;G4LW11	G4LW12
Smp_072950	G4V9Y3	G4V9Y3
Smp_072970	G4VA50	n.a.
Smp_072980	G4VA51	n.a.
Smp_073080	G4VA67;G4VA66	n.a.
Smp_073210	G4VA81	n.a.
Smp_073270	n.a.	G4VA87
Smp_073280	n.a.	G4VA88
Smp_073290	G4VA89	n.a.
Smp_073300	G4VA90	n.a.
Smp_073400	G4VSW2	G4VSW2
Smp_073410	G4VSW3	G4VSW3
Smp_073450	n.a.	G4VSW4
Smp_073500	G4V779;G4V780	G4V779;G4V780
Smp_073540	G4V785	G4V785
Smp_073560	G4V788	n.a.
Smp_073590	G4V709	G4V709
Smp_073600	G4V708	G4V708
Smp_073620	G4V705	G4V705
Smp_073690	G4V6Z9;G4V700	n.a.
Smp_073720	G4V6Z7	G4V6Z7
Smp_073790	G4V6Z2	n.a.
Smp_073880	G4M051;G4M050	G4M051;G4M050
Smp_073930	G4M055	G4M055
Smp_073940	G4M057	G4M057
Smp_074000	G4M062	G4M062
Smp_074020	G4VGJ9	G4VGJ9
Smp_074070	G4VGJ4;G4VGJ3	n.a.
Smp_074140	G4VL99	G4VL99
Smp_074150	C4QH88;Q9XY89	C4QH88;Q9XY89
Smp_074190	G4VLA4	G4VLA4
Smp_074260	G4VLB2	n.a.
Smp_074370	G4VLC3	n.a.
Smp_074390	G4VLC5	n.a.
Smp_074410	G4VLC7	n.a.
Smp_074450	n.a.	G4VRC9
Smp_074460	n.a.	G4VRC7
Smp_074500	G4VRC3;G4VRC2	G4VRC3;G4VRC2
Smp_074590	n.a.	G4LZC5
Smp_074610	C4QHD7;C4QNM9	n.a.
Smp_074700	G4LZB1	G4LZB1
Smp_074780	G4VH28	G4VH28
Smp_074870	G4VH20	G4VH20
Smp_074940	G4VH14	n.a.
Smp_075040	G4VH08	n.a.
Smp_075120	G4VH00	G4VH00
Smp_075210	G4VS57;G4VS58	G4VS57;G4VS58
Smp_075220	G4VS61;G4VS59;G4VS60	n.a.
Smp_075350	n.a.	G4LX32
Smp_075370	n.a.	G4LX29
Smp_075400	n.a.	G4LX25
Smp_075420	n.a.	G4LX23
Smp_075440	G4LX20;G4LX19	n.a.
Smp_075470	G4LZ70	G4LZ70
Smp_075560	G4VT90	G4VT90
Smp_075690	G4VT73	G4VT73
Smp_075770	n.a.	G4LW75
Smp_075800	n.a.	G4LW80
Smp_075940	G4LUW0	G4LUW0
Smp_076230	G4LZ69	G4LZ69
Smp_076390	G4LZI4	n.a.
Smp_076400	n.a.	G4LZI3
Smp_076500	n.a.	G4LZH2
Smp_076530	G4LZG8	n.a.
Smp_076580	G4LZG1	G4LZG1
Smp_076630	G4V7L7;G4V7L6	n.a.
Smp_076660	G4V7L5	n.a.
Smp_076740	G4VGR1	G4VGR1
Smp_076990	G4LXG0	G4LXG0
Smp_077020	G4LXG3	n.a.
Smp_077070	G4VTX9	G4VTX9
Smp_077090	G4VTX8	G4VTX8
Smp_077180	G4VTW8	n.a.
Smp_077230	G4VTW5	n.a.
Smp_077310	n.a.	G4VTN2
Smp_077330	G4VTM9	G4VTM9
Smp_077400	G4VTM4	G4VTM4
Smp_077540	G4VL48	G4VL48
Smp_077720	G4VL68;C3VEV0	G4VL68;C3VEV0
Smp_077880	n.a.	G4VL82;G4VL83
Smp_077980	n.a.	G4V878
Smp_078030	n.a.	C4QIB9
Smp_078040	C4QIC0	n.a.
Smp_078090	G4VN50	G4VN50
Smp_078240	G4VLY9	G4VLY9
Smp_078270	G4VTG7	n.a.
Smp_078310	G4VTH0;G4VTH1	n.a.
Smp_078320	G4VTH2	G4VTH2
Smp_078400	G4VRV4	G4VRV4
Smp_078410	G4VRV6	n.a.
Smp_078420	G4VRV7	n.a.
Smp_078600	G4V9Z1	n.a.
Smp_078610	G4V9Z2	n.a.
Smp_078640	G4V9Z3	n.a.
Smp_078690	P91888;G4LUS0	G4LUS0;P91888
Smp_078710	G4VJU8	G4VJU8
Smp_078720	G4VJU9	n.a.
Smp_078780	G4VEK4	G4VEK4
Smp_078800	G4VEK3	n.a.
Smp_079000	n.a.	Q15EU1
Smp_079010	G4LV34	G4LV34
Smp_079050	C4QIH8	n.a.
Smp_079220	G4VP51	G4VP51
Smp_079230	Q8MTB4	Q8MTB4
Smp_079240	G4V790	G4V790
Smp_079270	n.a.	G4V7B6
Smp_079290	G4V7B4;G4V7B3	G4V7B4;G4V7B3
Smp_079310	G4V7A8	G4V7A8
Smp_079430	G4V793;G4V792	G4V793;G4V792
Smp_079450	G4VM18	G4VM18
Smp_079480	G4VM16	G4VM16
Smp_079490	G4VM15	G4VM15
Smp_079560	G4V7V1	n.a.
Smp_079570	G4V7V2	n.a.
Smp_079600	G4V7V5	n.a.
Smp_079650	n.a.	G4V7W2
Smp_079710	G4VFB4	G4VFB4
Smp_079730	G4VFB6	n.a.
Smp_079740	G4VFB7	n.a.
Smp_079760	G4VFB9;G4VFC0	G4VFB9;G4VFC0
Smp_079770	G4VFC2;P38658;G4VFC1	G4VFC2;P38658;G4VFC1
Smp_079840	G4VFC7	G4VFC7
Smp_079860	G4M1I0;G4M1H9	n.a.
Smp_079920	G4VT40	G4VT40
Smp_079950	G4VT42	G4VT42
Smp_079970	G4VTA5	n.a.
Smp_080040	G4VTB0	G4VTB0
Smp_080100	G4VJM9	G4VJM9
Smp_080110	G4VJM8	n.a.
Smp_080150	G4VJM1	n.a.
Smp_080210	n.a.	G4VJL7
Smp_080360	G4V7M7	n.a.
Smp_080530	G4VRN3	G4VRN3
Smp_080550	G4VRN5	n.a.
Smp_080610	G4LZR0	G4LZR0
Smp_080620	G4LZQ9	n.a.
Smp_080670	G4LZQ3	G4LZQ3
Smp_080730	G4VLX9	n.a.
Smp_080850	G4VLZ3	n.a.
Smp_080920	G4VTE3;G4VTE4;G4VTE1;G4VTE2	G4VTE3;G4VTE1;G4VTE4;G4VTE2
Smp_081370	G4M0I4	G4M0I4
Smp_081380	G4M0I5	G4M0I5
Smp_081430	n.a.	G4LV77
Smp_081440	G4LV78	n.a.
Smp_081460	G4LV80;G4LV81	G4LV80;G4LV81
Smp_081470	n.a.	G4LV82
Smp_081570	C1M000	C1M000
Smp_081790	G4LY79	n.a.
Smp_081820	G4LY76;G4LY75;G4LY74	n.a.
Smp_081920	n.a.	G4VAS2
Smp_082030	G4VDR4	G4VDR4
Smp_082050	G4VDR2	G4VDR2
Smp_082120	C4QJA1	C4QJA1
Smp_082280	G4VM73	n.a.
Smp_082370	G4VN23	n.a.
Smp_082420	G4VGH9	G4VGH9
Smp_082430	G4VGI0	n.a.
Smp_082560	G4M1D1	n.a.
Smp_082570	Q15ES6	Q15ES6
Smp_082620	G4VC95	G4VC95
Smp_082660	G4VC92	n.a.
Smp_082670	G4VC91	n.a.
Smp_082740	G4VC85	G4VC85
Smp_082790	G4VC79	n.a.
Smp_082800	G4VC78	G4VC78
Smp_082810	G4VC76;Q8I899;G4VC77	G4VC76;Q8I899
Smp_082850	G4VC72;G4VC71	n.a.
Smp_082860	G4VC69	G4VC69
Smp_082940	G4LYT5	G4LYT5
Smp_082990	G4V767	G4V767
Smp_083020	G4V773	n.a.
Smp_083030	G4V774	G4V774
Smp_083040	G4V775;G4V776	G4V776;G4V775
Smp_083080	G4V7D8;G4V7D7	G4V7D8;G4V7D7
Smp_083120	G4V7E3	n.a.
Smp_083200	G4V7F5;G4V7F4	G4V7F5;G4V7F4
Smp_083240	G4LX94	G4LX94
Smp_083340	G4LXA0;G4LXA3;G4LXA1;G4LXA4;G4LXA2	n.a.
Smp_083400	Q2MK73	Q2MK73
Smp_083410	G4LXB1	G4LXB1
Smp_083450	G4LXJ2	n.a.
Smp_083530	G4LXK2;G4LXK3	n.a.
Smp_083650	G4V6T2	G4V6T2
Smp_083680	G4V6T3	n.a.
Smp_083720	G4V6T6	G4V6T6
Smp_083730	G4V6T7;G4V6T8	G4V6T7;G4V6T8
Smp_083740	G4V6T9	n.a.
Smp_083800	n.a.	G4V6U4
Smp_083870	G4LVV4;D6BNU5	G4LVV4;D6BNU5
Smp_084080	G4VRF6	n.a.
Smp_084090	n.a.	G4VRF7
Smp_084140	T1VXA1;G4VRA0;G4VR99;G4VR98	T1VXA1;G4VRA0;G4VR99;G4VR98
Smp_084380	G4VF15	n.a.
Smp_084400	G4VF17;G4VF19;G4VF18	G4VF17;G4VF19;G4VF18
Smp_084460	G4VSC8	n.a.
Smp_084610	G4V6D7	G4V6D7
Smp_084620	G4V6D6	G4V6D6
Smp_084740	G4LUR5	G4LUR5
Smp_084790	C4QK30	n.a.
Smp_084830	n.a.	G4VFD1
Smp_084860	G4VFG0	G4VFG0
Smp_084900	G4VFF7	G4VFF7
Smp_084940	G4VFF1;G4VFF2	G4VFF1;G4VFF2
Smp_085110	G4VES1;G4VES2;G4VES3	G4VES1;G4VES2;G4VES3
Smp_085150	G4V958	G4V958
Smp_085290	G4LV45;G4LV43;G4LV44	G4LV45;G4LV43;G4LV44
Smp_085300	G4LV42	n.a.
Smp_085310	G4LV40;G4LV41	G4LV40;G4LV41
Smp_085480	G4M0F3	G4M0F3
Smp_085500	G4M0F5	n.a.
Smp_085520	G4M0F7;Q15ET5	G4M0F7;Q15ET5
Smp_085530	G4M0F8	G4M0F8
Smp_085540	G4M0G4;G4M0G3;G4M0G1;G4M0G2;G4M0F9;G4M0G0	Q02456
Smp_085640	G4LX40;G4LX41	G4LX40;G4LX41
Smp_085740	G4VF34	G4VF34
Smp_085780	G4VF29	n.a.
Smp_085910	Q9NH63;Q9GQN8;G4LUM0	Q9NH63;Q9GQN8;G4LUM0
Smp_086030	G4LZA1;G4LZA0	n.a.
Smp_086060	G4V872	n.a.
Smp_086210	G4VCD7	n.a.
Smp_086330	G4M0V2	G4M0V2
Smp_086450	G4M149;G4M148;G4M150	n.a.
Smp_086460	G4M144	n.a.
Smp_086470	G4VA23;B8YCP4	G4VA23;B8YCP4
Smp_086480	P32070	P32070
Smp_086530	n.a.	P91804
Smp_086590	G4VGX1	G4VGX1
Smp_086600	G4VGX2	n.a.
Smp_086710	G4VKM1	n.a.
Smp_086860	G4V8L9	n.a.
Smp_086900	G4LXT7	G4LXT7
Smp_087010	G4LXU9	n.a.
Smp_087250	G4VJG3	G4VJG3
Smp_087270	G4VJG1	G4VJG1
Smp_087320	G4VJF8	n.a.
Smp_087440	C4QKQ4	n.a.
Smp_087550	G4VFB1	n.a.
Smp_087580	G4VFA8	G4VFA8
Smp_087620	G4VFA5	G4VFA5
Smp_087760	P25319;G4LUZ7	P25319;G4LUZ7
Smp_087860	G4VLR0	G4VLR0
Smp_087920	G4VLR7	G4VLR7
Smp_087930	G4VLR8	n.a.
Smp_087940	G4VLR9;G4VLS0	n.a.
Smp_088240	n.a.	G4VRS6
Smp_088260	G4VRS8	n.a.
Smp_088390	G4VSP2	n.a.
Smp_088550	G4V882	n.a.
Smp_088600	G4VDJ1	n.a.
Smp_088650	G4VDJ6	G4VDJ6
Smp_088660	G4VDP8	n.a.
Smp_088800	C1M093	n.a.
Smp_088940	G4VAR5	n.a.
Smp_088950	G4VAR6	G4VAR6
Smp_089000	G4VHM5;G4VHM6	G4VHM5;G4VHM6
Smp_089060	G4VHL5;G4VHL7;G4VHL6	G4VHL5;G4VHL7;G4VHL6
Smp_089100	G4VHL2	G4VHL2
Smp_089180	G4VAA7	G4VAA7
Smp_089200	G4VAB0	n.a.
Smp_089220	G4VAB2	G4VAB2
Smp_089290	n.a.	G4VLE3
Smp_089400	G4VLF4	n.a.
Smp_089430	C4QL66	C4QL66
Smp_089550	G4VDU3	n.a.
Smp_089590	G4V5T8	G4V5T8
Smp_089630	G4V5U1	n.a.
Smp_089640	G4V5U3;G4V5U2	G4V5U3;G4V5U2
Smp_089670	n.a.	G4V5U5
Smp_089700	G4V5U8;E7BBC0	E7BBC0;G4V5U8
Smp_089880	G4VCW4	n.a.
Smp_089930	n.a.	G4VCW8
Smp_090080	G4LYU6;Q26606	G4LYU6;Q26606
Smp_090120	Q26595;G4VHT1;G4V865	G4VHT1;Q26595;G4V865
Smp_090230	G4VQW2	n.a.
Smp_090370	G4LVM1	n.a.
Smp_090450	G4LVM8	G4LVM8
Smp_090520	n.a.	G4VP82
Smp_090690	G4VJ82	n.a.
Smp_090800	G4VJ72	G4VJ72
Smp_090820	G4VJ74	n.a.
Smp_090860	G4V8L2	G4V8L2
Smp_090870	G4V8L1	G4V8L1
Smp_090920	G4V8K8	n.a.
Smp_090930	G4V8K6;G4V8K4;G4V8K7;G4V8K5;G4V8K2;G4V8K3	n.a.
Smp_091010	G4VRK1;Q26547	G4VRK1
Smp_091190	G4VRI6;G4VRI7	G4VRI7;G4VRI6
Smp_091230	C4QLP6	C4QLP6
Smp_091240	G4M1U8;G4M1U7	G4M1U8;G4M1U7
Smp_091460	G4V9E4	G4V9E4
Smp_091640	G4VLN8	G4VLN8
Smp_091650	G4VLN7	G4VLN7
Smp_091730	G4VLM8	G4VLM8
Smp_091770	G4LUP4	G4LUP4
Smp_092170	G4VM62	n.a.
Smp_092280	G4VHX9	G4VHX9
Smp_092380	G4VHY6	n.a.
Smp_092460	n.a.	G4V5P9
Smp_092490	G4V5Q1	G4V5Q1
Smp_092500	n.a.	G4V5Q2
Smp_092530	G4VQA6;G4VQA5	n.a.
Smp_092570	C4QLY5	C4QLY5
Smp_092580	C4QLY6	n.a.
Smp_092750	G4VJY9	G4VJY9
Smp_092770	G4V6J3	G4V6J3
Smp_092810	G4VEZ9	G4VEZ9
Smp_093100	Q15ES3	n.a.
Smp_093220	G4V8Q6	G4V8Q6
Smp_093230	G4V8Q5	G4V8Q5
Smp_093310	C4QM45	n.a.
Smp_093320	C4QM46	n.a.
Smp_093430	G4VDT0	G4VDT0
Smp_093440	G4V605	G4V605
Smp_093690	G4V9R0;G4V9R1	n.a.
Smp_093700	G4V9R2	G4V9R2
Smp_093740	G4VTD8;G4VTD6;G4VTD7	G4VTD8;G4VTD6;G4VTD7
Smp_093750	G4VTD5;Q95W35	G4VTD5;Q95W35
Smp_093820	G4LYZ1	G4LYZ1
Smp_093930	n.a.	Q26566;G4VRX8
Smp_094050	G4LV68;G4LV69	G4LV68;G4LV69
Smp_094060	G4LV70	G4LV70
Smp_094090	n.a.	G4LV74
Smp_094140	G4M028	n.a.
Smp_094150	C1M0J1	n.a.
Smp_094190	n.a.	G4VR00
Smp_094250	C4QMA7	n.a.
Smp_094420	G4VC25	G4VC25
Smp_094480	G4VTR5	G4VTR5
Smp_094500	n.a.	G4VTR2
Smp_094570	G4LZD9	n.a.
Smp_094630	C1M0L0	n.a.
Smp_094660	G4V9M0	G4V9M0
Smp_094680	G4V9M3	G4V9M3
Smp_094820	G4VTT5	G4VTT5
Smp_094870	G4V965	n.a.
Smp_094880	G4V966	G4V966
Smp_094920	G4LZV4	n.a.
Smp_095000	G4VRY6	G4VRY6;G4VRY7
Smp_095130	G4VRL5	n.a.
Smp_095150	G4VRL7	G4VRL7
Smp_095190	G4VRL9	n.a.
Smp_095250	C4QMH7	C4QMH7
Smp_095360	P29498;G4M131;P29498-2;G4M130	P29498;G4M131;P29498-2;G4M130
Smp_095470	G4V848	G4V848
Smp_095520	n.a.	Q94758;G4V853
Smp_095620	n.a.	G4M101;G4M102
Smp_095630	Q86D97	Q86D97
Smp_095680	G4M0Z5	G4M0Z5
Smp_095810	G4VL95	n.a.
Smp_095920	G4VDN8	n.a.
Smp_096010	G4M0M8	G4M0M8
Smp_096020	G4M0M6;G4M0M5;G4M0M7	G4M0M5;G4M0M6;G4M0M7
Smp_096290	G4VS50;G4VS51	G4VS50;G4VS51
Smp_096360	G4LY44	n.a.
Smp_096390	n.a.	Q07167;G4VR58
Smp_096450	G4VR47;G4VR48	G4VR48;G4VR47
Smp_096530	G4LZM1	G4LZM1
Smp_096640	G4VR95	G4VR95
Smp_096750	G4VJD7	G4VJD7
Smp_096760	G4VJD5	G4VJD5
Smp_096790	C4QMW6	C4QMW6
Smp_096810	C4QMW9	n.a.
Smp_096840	G4LZP4	G4LZP4
Smp_096900	G4VBL5	n.a.
Smp_097020	n.a.	G4VJV7;G4VJV6
Smp_097090	G4VGR5;G4VGR4	n.a.
Smp_097210	G4VD04	n.a.
Smp_097240	G4V8U2;G4V8U3;G4V8U1	n.a.
Smp_097250	G4LZ40	n.a.
Smp_097280	G4V916	n.a.
Smp_097320	G4VMK5	G4VMK5
Smp_097370	G4VML1;Q5I945	G4VML1
Smp_097380	G4VML2	G4VML2
Smp_097490	G4LUA3	G4LUA3
Smp_097560	G4M0N4	n.a.
Smp_097590	G4M0N7	G4M0N7
Smp_097620	G4LXB4	G4LXB4
Smp_097660	G4LXB6	G4LXB6
Smp_097710	G4LXC0	G4LXC0
Smp_097750	G4LXC4	G4LXC4
Smp_097800	G4LXD0;Q27277;G4LXD2	G4LXD0;Q27277;G4LXD2
Smp_097810	G4LXD4	G4LXD4
Smp_098090	G4LV96	n.a.
Smp_098330	G4V8R9	n.a.
Smp_098590	G4M0Q5	G4M0Q5
Smp_098710	G4M193	G4M193
Smp_098760	G4M196	n.a.
Smp_098840	G4V683	G4V683
Smp_098890	G4LWB9;G4LWC0	G4LWB9;G4LWC0
Smp_098960	Q15ET4;G4LWB3	n.a.
Smp_099030	G4VR11	G4VR11
Smp_099170	G4LUY0	n.a.
Smp_099310	G4LUY9	G4LUY9
Smp_099320	G4LUZ0	G4LUZ0
Smp_099420	G4VLQ2	G4VLQ2
Smp_099630	G4VBN1	G4VBN1
Smp_099690	G4VBM7	G4VBM7
Smp_099800	G4VGH2	G4VGH2
Smp_099810	G4VGH3	G4VGH3
Smp_099870	G4VAD2	G4VAD2;Q94747
Smp_099890	G4VAD1	G4VAD1
Smp_099900	G4VAD0	n.a.
Smp_100090	Q6RYS1	Q6RYS1
Smp_100130	G4VG83;G4VG82	n.a.
Smp_100370	G4VBQ9	G4VBQ9
Smp_100380	C1M0W4	n.a.
Smp_101200	G4V714	G4V714
Smp_101230	C4QNZ5	n.a.
Smp_101240	C4QNZ6	C4QNZ6
Smp_101290	G4VBW9;G4VBW8	G4VBW8;G4VBW9
Smp_101450	C4QP14	C4QP14
Smp_101820	G4V932	n.a.
Smp_101970	G4VTB5	G4VTB5
Smp_102040	Q8T6T3;C4QP68;C4QP69	Q8T6T3;C4QP68;C4QP69
Smp_102070	P35661	P35661
Smp_102240	G4VQR0	n.a.
Smp_102280	G4VDE9	n.a.
Smp_102340	n.a.	G4LV57;G4LV56
Smp_102450	G4VP84	n.a.
Smp_102490	G4VBB0	n.a.
Smp_102690	C4QPD1;C4QPD2	n.a.
Smp_102820	G4V917	n.a.
Smp_102840	G4VSZ7	G4VSZ7
Smp_102960	n.a.	G4M1T0
Smp_103000	G4VDP3	G4VDP3
Smp_103010	G4LXG6	n.a.
Smp_103100	G4VTQ5	G4VTQ5
Smp_103140	Q26444	Q26444
Smp_103160	C4QPH4;C4QPH5	n.a.
Smp_103200	n.a.	G4VGY6
Smp_103310	G4LYV4	G4LYV4
Smp_103320	G4LYV3	G4LYV3
Smp_103380	G4VKN3	G4VKN3
Smp_103460	C4QPK4;C4QPK3	C4QPK4;C4QPK3
Smp_103470	C4QPK6	C4QPK6
Smp_103560	G4LWQ2;P09383	G4LWQ2;P09383
Smp_103570	G4VBN3	n.a.
Smp_103610	n.a.	P25792
Smp_103710	G4VRA7;Q2VU46	G4VRA7;Q2VU46
Smp_103740	G4VRV1;G4VRV0	G4VRV1;G4VRV0
Smp_103810	G4VCQ1;G4VCQ2	n.a.
Smp_103920	C4QPQ0	n.a.
Smp_103930	G4LYS9;C4QPQ2;C4QPQ1	n.a.
Smp_103950	G4VAT7	n.a.
Smp_103990	G4VAT4	n.a.
Smp_104030	G4VAS9;G4VAT0	G4VAS9;G4VAT0
Smp_104110	n.a.	G4VAJ6
Smp_104270	G4VRB5	G4VRB5
Smp_104330	G4VCJ9	G4VCJ9
Smp_104440	Q15ET0;G4M0D6	Q15ET0;G4M0D6
Smp_104450	G4M0D7	n.a.
Smp_104470	G4M0E0;G4M0D9	G4M0E0;G4M0D9
Smp_104500	C4QPU0	C4QPU0
Smp_104520	C4QPU2	C4QPU2
Smp_104580	G4VE51	n.a.
Smp_104600	G4VE48;G4VE49	n.a.
Smp_104630	G4VE45	n.a.
Smp_104660	G4LXZ2	n.a.
Smp_104670	G4LXZ3	G4LXZ3
Smp_104680	G4LXZ4;G4LXZ5	n.a.
Smp_104710	G4VQ23	n.a.
Smp_104720	C1M169	C1M169
Smp_104730	G4VQ26	n.a.
Smp_104870	G4M179	n.a.
Smp_104960	G4VJV9	n.a.
Smp_105020	G4V6G9	G4V6G9
Smp_105040	n.a.	G4V6H2
Smp_105180	G4VE41	n.a.
Smp_105220	B8Y6H3	B8Y6H3
Smp_105320	O17307;G4V5D8	n.a.
Smp_105330	G4V5D9	G4V5D9
Smp_105420	n.a.	Q26587;Q26536;Q26535;G4VC43
Smp_105450	n.a.	Q8ITD8;G4VC39
Smp_105480	G4VC35	n.a.
Smp_105680	G4LWC8;G4LWC9	G4LWC8;G4LWC9
Smp_105700	G4LWC6	G4LWC6
Smp_105710	G4LWC4;G4LWC5	G4LWC4;G4LWC5
Smp_105860	A5HIF3;G4VEQ8	n.a.
Smp_105930	G4VEQ4	n.a.
Smp_105960	G4VEQ0	n.a.
Smp_105970	G4VEP8;G4VEP9	G4VEP8;G4VEP9
Smp_106060	n.a.	G4VEN7
Smp_106080	C4QQ81;C4QQ82	C4QQ81;C4QQ82
Smp_106130	G4VEN0;G4VEM9	G4VEN0;G4VEM9
Smp_106930	G4V8L4	G4V8L4
Smp_108050	G4VNR6	G4VNR6
Smp_110280	G4VB13	n.a.
Smp_112660	n.a.	G4VSB4
Smp_113620	G4VBT2;G4VBT0;G4VBT1	G4VBT2;G4VBT0;G4VBT1;G4VBS9
Smp_113630	G4VJ97	n.a.
Smp_113740	G4LWS5	G4LWS5
Smp_114090	G4M190	G4M190
Smp_114430	n.a.	G4V874
Smp_114540	G4VPM5	G4VPM5
Smp_114900	G4VJ73	G4VJ73
Smp_115290	G4VAX8	n.a.
Smp_115450	G4VND4	n.a.
Smp_116360	C1M2E3	n.a.
Smp_117810	n.a.	G4VGB1
Smp_118280	G4V703	n.a.
Smp_118820	G4M1X2	G4M1X2
Smp_118830	G4LVU9	G4LVU9
Smp_118970	n.a.	G4VMU2;A0A075FFK0
Smp_119310	G4VIG2;A9NI59	G4VIG2;A9NI59
Smp_119910	C4QU01	n.a.
Smp_119920	C4QU02	C4QU02
Smp_120070	G4VSH5	G4VSH5
Smp_120080	G4LZ98;G4LZ99	G4LZ98;G4LZ99
Smp_120320	C4QU54	C4QU54
Smp_120350	C4QU57	n.a.
Smp_120360	C1M2S7	n.a.
Smp_120630	G4LW21	n.a.
Smp_120640	G4M1X6;G4M1X7;C4QU84	G4M1X6;G4M1X7;C4QU84
Smp_120700	G4LX89	G4LX89
Smp_120900	C4QUB0	n.a.
Smp_120920	G4VAL0;G4VAL1;G4VAK9	n.a.
Smp_120960	G4VFM0;G4VFL9;G4VFL8	n.a.
Smp_121420	G4LUK0	n.a.
Smp_121430	G4LUJ6;G4LUJ7	G4LUJ6;G4LUJ7
Smp_121460	G4LUJ3	n.a.
Smp_121610	G4VEC8;G4VEC9;G4VED0	n.a.
Smp_121660	n.a.	G4LZA8
Smp_121790	G4VGE1	n.a.
Smp_121800	G4VGE0	G4VGE0
Smp_121810	G4VGD8	n.a.
Smp_121940	n.a.	G4VAU5
Smp_121950	n.a.	G4VAU6
Smp_121990	G4VAV1	G4VAV1
Smp_122030	n.a.	G4VAV5
Smp_122170	G4LVT8	n.a.
Smp_122370	G4LYH5;G4LYH6	n.a.
Smp_122730	G4VDY2	n.a.
Smp_122780	G4VDW6	n.a.
Smp_122800	G4VDW4	n.a.
Smp_122820	G4LVN1	n.a.
Smp_122830	G4LVN0	G4LVN0
Smp_122840	G4LVM9	G4LVM9
Smp_122900	G4VCF9	G4VCF9
Smp_122930	G4VCG4	G4VCG4
Smp_122970	G4VCH1	n.a.
Smp_123010	n.a.	G4VCH8
Smp_123030	G4VCI0	G4VCI0
Smp_123060	G4VLF8	G4VLF8
Smp_123080	G4VLG0	G4VLG0
Smp_123110	n.a.	G4VLG8
Smp_123165	G4VLH7	G4VLH7
Smp_123170	G4VLH8	n.a.
Smp_123180	n.a.	G4VLH9
Smp_123270	G4VLL6	G4VLL6
Smp_123290	E7BBH9;G4VLL9	E7BBH9;G4VLL9
Smp_123340	G4VBL1	n.a.
Smp_123440	G4VF64	G4VF64
Smp_123450	G4VF62	n.a.
Smp_123490	G4VF56	G4VF56
Smp_123510	G4VF52	G4VF52
Smp_123520	G4VF51	n.a.
Smp_123530	G4VF50	n.a.
Smp_123550	n.a.	G4VG30;B1NYH8
Smp_123670	G4VLJ3	G4VLJ3
Smp_123750	G4V6Y7	G4V6Y7
Smp_123770	G4VBG0	n.a.
Smp_123830	n.a.	G4V6X6
Smp_123870	G4V6X0_SCHMASynaptobrevin,putative	G4V6X0_SCHMASynaptobrevin,putative
Smp_123930	G4V6W2	n.a.
Smp_123990	G4V6P2	G4V6P2
Smp_124000	n.a.	A0A1C9A1I5;A0A1C9A1I3;A0A1C9A1J0
Smp_124050	n.a.	Q1XAN2;G4V6N3;G1EN92;G4V6N1;G4V6N2
Smp_124060	n.a.	Q1WIQ5;G4V6N0
Smp_124070	G4V6M9	G4V6M9
Smp_124100	n.a.	G4V6M6
Smp_124110	G4V6L9	n.a.
Smp_124220	G4V6K1	n.a.
Smp_124230	G4V6K0	n.a.
Smp_124240	C4PY08	C4PY08
Smp_124300	G4V6C5	n.a.
Smp_124310	G4V6C4	n.a.
Smp_124320	G4V6B7	n.a.
Smp_124360	n.a.	Q643Y7;G4V6A8
Smp_124430	G4VCJ4	G4VCJ4
Smp_124460	G4LXI8	G4LXI8
Smp_124640	G4VD48	n.a.
Smp_124760	n.a.	G4M1M7
Smp_124820	G4V5M0;G4V5L9	G4V5M0;G4V5L9
Smp_124860	G4V5Z4	n.a.
Smp_124910	n.a.	G4V612
Smp_124920	G4V613	G4V613
Smp_124980	G4LZK5	n.a.
Smp_125040	G4LZL3	n.a.
Smp_125070	G4LXX5;G4LXX6	G4LXX5;G4LXX6
Smp_125120	n.a.	G4LZE7
Smp_125130	n.a.	G4LZE5
Smp_125220	n.a.	G4V739;C4PYI6
Smp_125330	G4V720	G4V720
Smp_125480	n.a.	G4VDC1
Smp_125500	G4VDC3	G4VDC3
Smp_125540	G4VQQ8	n.a.
Smp_125640	G4LZ54	G4LZ54
Smp_125670	G4LZ58	G4LZ58
Smp_125710	n.a.	G4M1L8
Smp_125730	n.a.	G4V9X7
Smp_125770	G4V9X0;G4V9W9	G4V9W9;G4V9X0
Smp_125790	G4V9W6	n.a.
Smp_125800	G4V9W3	G4V9W3
Smp_126020	G4VB23	G4VB23
Smp_126110	G4VB10	n.a.
Smp_126170	G4VPN8	G4VPN8
Smp_126230	n.a.	G4M019
Smp_126240	G4M018	G4M018
Smp_126260	n.a.	G4VPZ6
Smp_126320	G4VPX3	G4VPX3
Smp_126370	G4VPW8	n.a.
Smp_126480	G4VN43	G4VN43
Smp_126490	G4VN42	G4VN42
Smp_126500	n.a.	G4VN41
Smp_126510	G4VN40	G4VN40
Smp_126520	G4VN39	G4VN39
Smp_126540	n.a.	G4V7J0
Smp_126670	G4V7G3	G4V7G3
Smp_126690	G4V7G0	G4V7G0
Smp_126720	G4V5G8	n.a.
Smp_126770	G4M145;G4M146	G4M145;G4M146
Smp_126850	G4VII3;G4VII2	n.a.
Smp_126860	G4VIE1	n.a.
Smp_126910	G4VIF4	n.a.
Smp_126990	n.a.	G4VIG8
Smp_127050	G4VIH8	n.a.
Smp_127070	G4VL35	n.a.
Smp_127340	G4LUI6	G4LUI6
Smp_127420	n.a.	G4LUH6
Smp_127450	n.a.	G4LUH3
Smp_127580	G4LUG6	n.a.
Smp_127620	G4M0X4	n.a.
Smp_127650	G4VML6	G4VML6
Smp_127730	G4VMM7	G4VMM7
Smp_127780	G4VMN3	G4VMN3
Smp_127810	n.a.	G4VMN7
Smp_127820	n.a.	G4VMP0
Smp_127830	G4VMP2	G4VMP2
Smp_127840	n.a.	G4VMP5
Smp_127940	G4VMR3	G4VMR3
Smp_128000	G4VKU6	G4VKU6
Smp_128050	G4LYD9	G4LYD9
Smp_128120	G4VD97	n.a.
Smp_128200	G4VD81;G4VD80	n.a.
Smp_128230	G4VD77	G4VD77
Smp_128280	G4VD74;G4VD73	G4VD74;G4VD73
Smp_128300	G4VD69	n.a.
Smp_128360	G4VS91	G4VS91
Smp_128370	n.a.	G4VS93
Smp_128380	n.a.	G4VS94
Smp_128490	G4VT13	n.a.
Smp_128510	G4VSC6	n.a.
Smp_128610	G4VS06	G4VS06
Smp_128650	G4VS12;G4VS11	n.a.
Smp_128690	G4VS85	n.a.
Smp_128770	G4VC58	G4VC58
Smp_128840	G4VC46	n.a.
Smp_128980	G4V9G0	G4V9G0
Smp_128990	G4V9G2	n.a.
Smp_129050	n.a.	G4V9H8
Smp_129060	n.a.	G4V9I0
Smp_129080	G4V9I3	G4V9I3
Smp_129120	G4VEW9	G4VEW9
Smp_129210	G4M0L7	G4M0L7
Smp_129240	G4M0L4	G4M0L4
Smp_129260	G4M0L0	n.a.
Smp_129320	G4LWT4	n.a.
Smp_129340	C4Q0P6	C4Q0P6
Smp_129410	G4VH53	n.a.
Smp_129500	G4VH38	n.a.
Smp_129520	G4VEK7	G4VEK7
Smp_129560	G4V6A4	n.a.
Smp_129590	G4V6A0	n.a.
Smp_129610	G4V698	G4V698
Smp_129630	G4LVH4	n.a.
Smp_129710	G4LVI7	n.a.
Smp_129720	G4LVJ1	n.a.
Smp_129820	G4VS41	n.a.
Smp_129950	G4LZ44	G4LZ44
Smp_129960	G4LZ43	n.a.
Smp_130100	n.a.	G4VBU4
Smp_130170	G4VBV9	n.a.
Smp_130180	G4VBW0	n.a.
Smp_130230	Q8I898;C4Q192	Q8I898;C4Q192
Smp_130260	n.a.	G4VMK3
Smp_130280	G4VG96	G4VG96
Smp_130300	Q95WT4;G4VGA0	Q95WT4;G4VGA0
Smp_130330	G4VGA8	n.a.
Smp_130400	C4Q195	C4Q195
Smp_130410	G4LYR6	G4LYR6
Smp_130520	G4LYQ2	G4LYQ2
Smp_130540	G4LYP9	G4LYP9
Smp_130580	n.a.	G4VRS1
Smp_130610	G4VRR7	n.a.
Smp_130670	G4VSK3	n.a.
Smp_130680	G4VSK5	n.a.
Smp_130750	G4VSM0	n.a.
Smp_130790	G4VSM7;G4VSM6	n.a.
Smp_130800	G4VSM9	n.a.
Smp_130850	G4VJN9	G4VJN9
Smp_130960	G4V5G0	n.a.
Smp_130970	G4V5F9	n.a.
Smp_130980	G4V5F8	n.a.
Smp_131000	G4VHE4	n.a.
Smp_131050	G4VHF4	G4VHF4
Smp_131080	G4VHG0	G4VHG0
Smp_131090	G4VHG2	n.a.
Smp_131150	G4VHH8	n.a.
Smp_131250	G4VKX1	G4VKX1
Smp_131280	G4VKX7	G4VKX7
Smp_131400	G4VL02	G4VL02
Smp_131420	G4VL05	G4VL05
Smp_131580	G4VTI2	G4VTI2
Smp_131630	G4VE82	n.a.
Smp_131660	G4VE88	G4VE88
Smp_131690	n.a.	G4VE93
Smp_131700	n.a.	G4VE95
Smp_131770	G4LW67	G4LW67
Smp_131790	G4V8Q2	n.a.
Smp_131800	G4LW63	G4LW63
Smp_131810	G4LW62;G9HW09	G4LW62;G9HW09
Smp_131860	G4VGX6	n.a.
Smp_131870	G4VGX9	G4VGX9
Smp_131890	G4VP60	G4VP60
Smp_131900	n.a.	G4VP58
Smp_131950	G4VNQ2	G4VNQ2
Smp_131990	G4VNX7	n.a.
Smp_132030	G4VNY7	n.a.
Smp_132300	G4VGN0	G4VGN0
Smp_132320	n.a.	G4VGM7
Smp_132330	n.a.	G4VGM5
Smp_132570	G4VG41	G4VG41
Smp_132620	G4LUE8;G4LUE7	G4LUE7;G4LUE8
Smp_132670	G4LUD9	G4LUD9
Smp_132690	G4LUD7	G4LUD7
Smp_132720	G4LUD1	n.a.
Smp_132740	G4LUC5	G4LUC5
Smp_132850	n.a.	G4VTW0;G4VTW1
Smp_132870	C4Q2I0	n.a.
Smp_132940	G4LYX6	n.a.
Smp_133020	n.a.	G4V8H0
Smp_133120	G4V8E5;G4V8E4	n.a.
Smp_133270	G4V8B5	G4V8B5
Smp_133280	G4V8B4	G4V8B4
Smp_133310	G4M005	G4M005
Smp_133320	G4LY86	n.a.
Smp_133450	G4LYA9	n.a.
Smp_133600	G4VDL3	G4VDL3
Smp_133700	G4V8I1	G4V8I1
Smp_133710	G4V8H7	G4V8H7
Smp_133820	G4VNH5	n.a.
Smp_133850	n.a.	G4VNG9
Smp_133880	G4VNG4	n.a.
Smp_134010	G4VE14	G4VE14
Smp_134020	G4VE15	n.a.
Smp_134140	G4VPI6	G4VPI6
Smp_134200	G4VPH3	n.a.
Smp_134230	G4VP93	G4VP93
Smp_134330	G4VEC5	n.a.
Smp_134400	G4VQ09	G4VQ09
Smp_134440	G4VPZ9;G4VQ00	G4VPZ9;G4VQ00
Smp_134510	G4VN13	G4VN13
Smp_134570	n.a.	G4VN07
Smp_134590	G4VN04	n.a.
Smp_134650	G4VCB5	n.a.
Smp_134660	G4VCB4	n.a.
Smp_134850	G4VFS0	n.a.
Smp_134860	G4VFS2	n.a.
Smp_134940	G4VFT5	n.a.
Smp_135010	G4VQE3	G4VQE3
Smp_135050	G4VD27	n.a.
Smp_135060	G4VD25	n.a.
Smp_135080	G4VD23;G4VD22	G4VD23;G4VD22
Smp_135100	G4VD20	n.a.
Smp_135120	G4VD15	n.a.
Smp_135280	n.a.	G4VQ77
Smp_135360	G4VQ85	n.a.
Smp_135400	G4VQH1	n.a.
Smp_135500	G4VIQ4	G4VIQ4
Smp_135790	G4M1K0	G4M1K0
Smp_135930	G4VPF0	n.a.
Smp_136010	G4VPD3	n.a.
Smp_136140	G4VAQ5	n.a.
Smp_136210	G4VAP5	G4VAP5
Smp_136240	G4VKP3;G4VKP4;G4VKN9;G4VKN8;G4VKN7;G4VKP0;G4VKP2;G4VKP1	G4VKP3;G4VKP4;G4VKN9;G4VKN8;G4VKN7;G4VKP0;G4VKP2;G4VKP1
Smp_136260	G4VKP9	G4VKP9
Smp_136270	G4VKQ0	n.a.
Smp_136290	G4VKQ4	n.a.
Smp_136320	G4VJX1	G4VJX1
Smp_136330	G4VEZ7	n.a.
Smp_136640	G4VKW2	G4VKW2
Smp_136690	n.a.	G4LUT1
Smp_136710	O96527	n.a.
Smp_136730	Q2Q0I8;G4VFY7	n.a.
Smp_136740	G4VFZ2	n.a.
Smp_136750	G4VFZ3	n.a.
Smp_136800	C4Q4J8	C4Q4J8
Smp_136930	n.a.	G4VHC1
Smp_136960	G4VHB5	G4VHB5
Smp_136970	G4VHB4	n.a.
Smp_136990	G4VHB1	G4VHB1
Smp_137020	G4VIB5	G4VIB5
Smp_137070	G4VIC3;G4VIC4	n.a.
Smp_137170	G4VID8	G4VID8
Smp_137190	G4M097	n.a.
Smp_137230	G4M090	n.a.
Smp_137240	G4M088	n.a.
Smp_137330	G4LU81	n.a.
Smp_137390	G4V627	n.a.
Smp_137430	G4LWX9	G4LWX9
Smp_137460	G4LW19	n.a.
Smp_137540	G4LX00	G4LX00
Smp_137580	G4LX09	n.a.
Smp_137590	G4VP71	n.a.
Smp_137650	G4VBF2	n.a.
Smp_137660	G4VBF0	n.a.
Smp_137750	n.a.	G4M0U4
Smp_137830	G4VGS9	n.a.
Smp_137920	G4VGU2	G4VGU2
Smp_137940	n.a.	G4VGU4
Smp_138010	G4LZU7	G4LZU7
Smp_138050	G4LZU3	n.a.
Smp_138160	G4LW92	n.a.
Smp_138180	C4Q592;G4LW88	n.a.
Smp_138210	n.a.	G4VFG4
Smp_138220	G4VFG7	n.a.
Smp_138280	G4VFH8	n.a.
[truncated: 1,052 more rows]
