# Supplementary material for: Evolution of gene dosage on the Z-chromosome of schistosome parasites
Source: eLife. 2018 Jul 25;7:e35684. doi: 10.7554/eLife.35684 (PMC6089595; doi:10.7554/eLife.35684)
Supplement: Figure 4—source data 6. [file elife-35684-fig4-data6.xlsx]

## Sheet: Figure 4-source data 6
Figure 4-source data 6: Microarray data
Gene_ID	female_head_norm	male_head_norm	ovary_norm	testis_norm
Smp_000020	14.3369920393921	20.7350935984283	40.7256957819093	23.5108957607358
Smp_000030	1861.06747415524	2190.14754098085	3872.45668895072	3333.52649175273
Smp_000040	208.575734989311	239.141315973955	158.033644651063	174.170493610449
Smp_000050	193.581102244671	173.98682753077	163.381829030224	129.622459295696
Smp_000070	1096.19927283481	888.021047668267	3237.71750155692	1468.88274109445
Smp_000080	1292.01896601309	1147.02978824069	674.34111924391	848.826180585985
Smp_000090	105.93651341465	79.9379549547875	28.0662292550462	664.525045538933
Smp_000100	59.0745903979294	30.5527891451272	23.9600112487678	12.1372382090512
Smp_000110	1.93220156828129	1.89440063787958	29.7910065063486	5.05616947796033
Smp_000130	33.1972333188069	45.8178516201105	30.7698914899523	38.8418126827165
Smp_000140	1047.97526304014	1257.92672252977	2578.11870038188	1848.70120653872
Smp_000150	760.705536897164	890.801970882378	1679.17774564769	1279.02617236116
Smp_000170	224.69989003208	406.777193090746	376.090620054084	262.37037506773
Smp_000190	1214.77086024309	608.162437626023	406.083895791869	322.051924698777
Smp_000200	180.909444760489	270.586168888797	372.893495636724	245.27111105203
Smp_000220	1.80093155991706	1.87710100014	6.9871075427913	3.52686589947163
Smp_000230	25.9813289668382	36.1962007864288	113.068574935432	151.20962841236
Smp_000240	3427.30844312167	3523.69301924773	6534.69572463524	8819.4051580936
Smp_000260	5130.62470855162	6752.4689030173	1199.17540269238	4149.39186214845
Smp_000270	19.4640837855468	2.12366690498701	5.6971397598264	4.82593572427826
Smp_000280	147.752295178526	1.94871662060635	5.6118470769697	59.7111597340419
Smp_000310	1308.68850867682	1206.18182514691	966.150550849845	1373.07808423984
Smp_000340	1.70706811638138	1.86563856666193	2.85476188635876	6.39409823276007
Smp_000350	1.56134194545941	1.63411716783108	2.0784859105517	2.11967498631215
Smp_000420	179.734610478428	3.08060297190299	7.80984037821276	23.891498256396
Smp_000430	1022.13287752366	6.73955354154841	51.1425856038349	115.462058697399
Smp_000440	381.087448892095	427.673200515997	1347.58897921102	573.960625952433
Smp_000460	1385.78520775044	1480.51251896449	4581.2842949017	3189.33830525513
Smp_000470	355.269781448892	383.079308905598	711.027838903684	638.382370415375
Smp_000480	1063.33937935443	1239.42198784307	4447.52166940272	1769.26188119087
Smp_000500	5.25401768205152	2.14675437379817	2.48114393534035	2.36578047362416
Smp_000510	523.176071446852	487.720197690199	366.769560829898	983.205566580075
Smp_000520	516.68319856457	746.611480717062	606.062625320257	1047.59717687605
Smp_000530	57.2338300231129	40.745472205	21.1107419737496	59.0071082753709
Smp_000590	4490.86996072704	3573.66235597318	7950.61742928074	7865.07765138695
Smp_000600	139.644886550088	117.697383798166	846.712364479723	243.164036818305
Smp_000630	168.147826395494	128.690359159647	496.364153398253	303.781521076843
Smp_000640	1770.31158836578	1689.29935039154	1443.93568803199	1128.93110712578
Smp_000650	226.551118251459	217.849117570984	334.14265046759	665.225308471592
Smp_000660	196.668451359444	506.905758858066	9.60448528779688	121.103780070281
Smp_000670	57.2315033567337	97.8831788821194	59.0738840512298	155.099673356488
Smp_000680	324.69213071811	249.513636353017	533.633552441405	354.761201515124
Smp_000700	17.3255348027224	20.3234276448076	63.3617698806863	63.533479154736
Smp_000710	648.848294928134	738.434902634936	2710.28104919284	1121.87008808729
Smp_000720	68.0957730649441	74.7264539557567	252.730519760822	287.976442438132
Smp_000730	5.11198790742315	11.0196272354361	10.9484452341752	9.1023958653529
Smp_000740	5200.5630356462	5159.82173166387	5123.09697516632	7104.36745295113
Smp_000755	667.290692349366	913.032695947698	7.73141597491799	56.362918942649
Smp_000780	8.96721172531279	12.1030749722364	6.28573437318318	14.3931264704209
Smp_000810	449.076998280373	304.09944265553	1973.39677850502	1261.91519523349
Smp_000820	3711.31219117356	4635.55328762033	26.6798898640592	385.132578322107
Smp_000850	565.527869092557	791.393085980969	617.644314141387	183.932758455996
Smp_000860	2.26975143569518	6.4674158931557	17.8107671700637	7.27360344168467
Smp_000870	21.8320598369371	29.9093535020472	44.8112649936251	47.666211799362
Smp_000880	6623.11494264895	5774.38175941877	13809.6987130614	11106.1728052817
Smp_000890	303.966083217747	288.896346660546	867.268958434156	1135.52920853333
Smp_000980	3666.88198564009	2766.81193462434	4375.47869234678	9726.80745720592
Smp_000990	23.1936619224172	27.0028904746222	60.2661968395867	64.7440665245855
Smp_001000	826.116416974495	577.754094917939	3.92833166780305	39.3428203977472
Smp_001010	17.3102380981943	17.6912504143802	129.027873176895	43.8403488386484
Smp_001030	57.8952257170886	75.2362422502192	65.5677879107295	37.8530520705626
Smp_001040	538.913118692776	565.187097365832	472.02204212414	836.17428269511
Smp_001050	2.71423459017075	8.76307912866356	115.991429780274	46.0556120371466
Smp_001070	19.2275540341974	14.2138312067007	12.8710497210478	29.9982154274058
Smp_001080	1971.44277344587	1445.58793153133	655.714939061662	5730.22309008586
Smp_001090	125.850363315971	150.876520200231	457.449589075299	533.487323713082
Smp_001095	9.06010828735358	10.8238602576992	52.4800523713765	30.0998046615756
Smp_001100	32.2296763750303	61.7464355271588	3.43138382729612	19.5576561498472
Smp_001110	1.50851845727687	1.61465492349024	1.97220949394098	2.06100566083665
Smp_001150	164.798585001901	178.417264238152	406.24763914995	199.619540138392
Smp_001160, Smp_122700	9.01251003377511	10.9015560430844	3.19410437079294	206.041167705832
Smp_0011640	64.1177543202494	106.982009748836	77.632113795313	132.260158414492
Smp_001170	543.015418920791	561.540267017826	2156.08533937706	988.199664251301
Smp_001180	17.2016388323677	12.3241493057139	37.2962787804805	42.7474394862857
Smp_001210	1.98525173883045	1.89720230536257	17.5899386264465	10.1362834633862
Smp_001390	97.5947868529371	136.603779972299	200.853614379679	354.523650740671
Smp_001410	1159.4691327708	1203.19488417789	1593.21652462423	1668.15841011755
Smp_001430	1027.68315599588	862.644049106857	1734.11512809446	2002.60555461554
Smp_001500	2837.54036868627	2698.70830651314	9746.02225578529	6487.21487997043
Smp_001520	382.395913548028	502.613652218358	1712.56116017603	1163.07181203707
Smp_001530	356.68818159153	432.98023752033	696.222693712518	1055.51772953339
Smp_001590	794.911517330061	695.91590283368	1611.02195261567	1724.14631635991
Smp_001640	8914.48991566594	7842.00035384217	8927.10313325197	5528.89106265877
Smp_001780	158.077949466513	48.5532378211984	6.61499785590958	18.6519790779218
Smp_001830	7605.00032975196	5896.79660797331	20964.8775749459	21128.532106267
Smp_001940	315.404810182301	175.349709432186	261.124098456568	275.671980926408
Smp_001950	261.92592728915	312.30230875492	174.022478531404	359.358536907968
Smp_001960	445.684519653656	361.342426719788	1013.21557064756	758.037777301778
Smp_001990	13.1747666868619	10.8364640502037	5.69582733876727	31.0104520016626
Smp_002060	2.48428865739256	39.0362412293203	2.71268337759714	2.39893646789944
Smp_002070	1.76303867272254	1.64702344316584	3.44281367540159	2.12652494609986
Smp_002080	1246.78117517217	722.266299618829	5558.76743831041	1483.91510938508
Smp_002100	2456.26494733506	5570.56824566349	1873.36022006371	943.014427869724
Smp_002150	3624.77463144203	1744.1079554297	10.547014120642	69.4613939716316
Smp_002160	248.29460276565	216.623110805967	502.254289749145	752.615139635495
Smp_002180	8663.03089058225	7611.94009822225	32765.574904482	17991.6024908165
Smp_002190	499.040686723553	362.442862493888	1181.83183480809	612.567870182358
Smp_002230	223.402042161838	215.400996958971	1094.08356949944	688.709321729102
Smp_002280	322.153867319991	422.895366537505	730.505260029096	1005.58879080485
Smp_002380	585.309654017453	592.969987281656	492.697492909508	454.77317271917
Smp_002510	2622.03781076509	2042.40945734279	4061.49247613235	6532.9033713542
Smp_002550	3472.94140124487	3268.17220725968	8772.58976043928	6373.49425353597
Smp_002600	1029.12998437789	622.757164205653	490.328503060602	670.82458039517
Smp_002640	1.87820965425095	1.8674569173343	3.00128232137365	2.94102716185996
Smp_002740	1699.69142982888	1275.30752936622	1996.9890777537	1697.77645799727
Smp_002810	129.41932372203	128.878932893361	478.337260233077	923.313754748473
Smp_002820	173.194085799778	150.466932952225	268.533331692877	305.379222899054
Smp_002840	183.219905686118	229.838213933709	312.455648538773	209.760500412437
Smp_002870	50.9601468422703	45.6163952152937	107.940226214844	31.9031990048286
Smp_002880	5011.33114704698	5587.04395149266	11791.29038096	11104.1755411383
Smp_002890	44.5908325286315	59.4337444003142	14.629519875141	13.5594452457984
Smp_002920	359.335573559544	503.44167737323	539.828409594287	299.941853556051
Smp_002930	22.7308266056881	36.087954365359	868.939916388906	112.045298829606
Smp_002960	78.6245750864684	61.6174077329499	278.520320361905	64.2431726296138
Smp_003000	370.161972979606	502.971335857445	1757.92981671378	648.084344769715
Smp_003110	1316.36466412548	2191.76988239557	2825.15504030336	331.771343253523
Smp_003130	583.16938293492	615.421904824694	857.573066148165	1334.11358128016
Smp_003140	218.581415898683	247.385355005477	208.609696041895	261.305738423809
Smp_003190	15.5172752427688	42.5546752518888	17.5320366379054	719.497862683768
Smp_003230	1174.21453868027	1825.57870172284	210.734449872368	763.783800171457
Smp_003250	7.38300805766991	12.2108736569851	18.4495663007402	24.5044309386123
Smp_003270	1.64011096255549	1.573932993003	3.0911547326293	5.41464980987554
Smp_003330	79.4193403774102	82.9749068849153	188.230235255333	789.512472109669
Smp_003340	326.265429135502	389.214329000069	879.802501309289	343.732388510455
Smp_003410	7810.02225038232	5187.47109606399	20089.8639142515	10935.1078945737
Smp_003440	148.085509217385	196.481285979379	2.9517366163165	5.67283559686226
Smp_003610	3261.94664780788	2948.4424209327	70.3386460587967	329.487923989438
Smp_003620	132.914778387228	123.881135727634	196.969530994413	92.3203367489028
Smp_003630	972.789175320446	941.877561360681	2412.14090542734	2433.56197870087
Smp_003660	1958.22509454112	1900.94167863639	3258.21724298803	3539.60148941194
Smp_003670	276.686466334148	363.889851190755	1258.43106226006	940.059638799087
Smp_003700	7477.02496890011	4616.68518439224	11204.3073649438	15835.4410917658
Smp_003710	1568.79947744432	1643.35729230114	1300.08161066511	1359.82606563938
Smp_003760	2.09886144170257	1.83851923282834	7.49591283891424	5.07163385802715
Smp_003770	7537.80712158155	7975.14356143073	8835.65228594818	29691.064891776
Smp_003860	628.235780678778	652.066404239331	1443.59695314798	1213.46094555901
Smp_003930	55.5275597931557	85.9569229925411	20.6986630358031	2033.74140679918
Smp_003940	29.4042786894403	26.0531874334466	66.2123750068329	38.2760666976904
Smp_003970	2366.10468832023	1690.28737378958	13887.9770787805	4835.15717504127
Smp_003980	103.439987982191	152.89577192817	183.183903504656	225.311373292507
Smp_003990	14289.3433719563	17362.9089578266	4270.3999414038	9355.33934305826
Smp_004000	148.892227660297	94.3109707532061	1307.89510971884	340.301459955568
Smp_004020	69.7832098783305	73.1539781406941	269.761592499203	304.039785509567
Smp_004040	48.5325340552914	48.5358771229379	107.156303536158	80.3730151841026
Smp_004060	41.7522341951302	82.6599692849938	3248.85481275658	1546.59504532849
Smp_004080	178.572111198408	228.451073442669	1490.99168599514	1079.90126650004
Smp_004090	87.202685722191	87.6805021374506	130.292881228642	98.5004086699002
Smp_004120	39.5664898098258	47.0993658235106	36.8821305367742	27.8550609825118
Smp_004160	90.2983671483642	119.489348404131	60.8597018822473	3936.72960414591
Smp_004170	133.910822626308	109.960838462859	266.88990540521	106.776069249679
Smp_004190	427.732495923904	418.212458888339	100.035619980508	96.9733894878471
Smp_004200	1614.34102374699	2136.14832057967	992.96484784131	1906.03926131807
Smp_004220	727.378003346318	736.35893112937	1771.48654837458	945.877355248408
Smp_004260	1781.81426876248	1866.13699333454	4186.45569201962	4538.11106601674
Smp_004280	9.02568616423071	8.39687776236696	28.7635007848748	9.55403081312449
Smp_004310	7919.20310244957	5102.12940466593	3657.76634550846	2433.29166554689
Smp_004350	1693.02326700564	1450.6554846324	1053.64339871378	3358.31172695544
Smp_004360	3052.60555928103	3165.22981310881	4097.93713219373	4811.08398717388
Smp_004420	1102.89403869441	288.965221417037	7.7695233371874	35.24802207261
Smp_004470	1180.00829694086	1094.40270401254	1752.76679597053	1384.00350201633
Smp_004480	1140.40250301955	1104.42072099519	1820.49751867675	1528.7751764175
Smp_004550	5156.98689248505	5086.98371993604	5677.39826633148	9419.03838951706
Smp_004590	25.4046866809687	20.593676499237	52.0029890842835	25.5373793659882
Smp_004600	1320.39145874488	1342.1476538781	5851.60112444016	5572.35321773138
Smp_004630	189.498837161749	155.619972206208	190.107608152331	125.018290417746
Smp_004640	12.8596184940923	15.5939613622918	161.455900777899	36.3173742289149
Smp_004680	3189.43902781135	2577.35484001302	1395.69306554963	2430.43367914185
Smp_004690	1362.83646670473	1803.31072557693	265.845009360062	642.552807673027
Smp_004710	613.059518772479	343.081960540536	3.62842464141858	19.8231044025056
Smp_004730	3.91028398815612	3.43317391477169	11.1546326585396	90.1367873149245
Smp_004780	10695.4351771074	11743.967387156	15521.3721737591	28374.2197454766
Smp_004810	1281.22779693901	1364.74865514317	2027.62157082711	2145.22958264685
Smp_004820	2751.58144582401	2552.86472171076	2823.27133858047	1824.71422982045
Smp_004910	2290.66691095588	1827.63331001928	2893.78540699293	3200.37648749622
Smp_004940	6930.74510452938	2871.80392092011	19517.5240663992	9985.76539185969
Smp_004980	8268.11096960742	6649.09258263261	12441.894414318	11654.2929286112
Smp_004990	3516.35205898834	3596.52104954551	21414.5488410448	18284.9074964683
Smp_005000	1111.69171751261	1079.4450996007	916.574336957681	2981.37835217229
Smp_005010	812.675344934051	662.717985675419	2264.57896280541	1787.06954666678
Smp_005020	715.752249241876	988.508298324488	1303.9708303965	607.421236901819
Smp_005060	525.719278419552	489.463753028621	729.253998925251	1209.30650618942
Smp_005070	367.856942371769	480.435948015869	254.591750876292	271.439766984559
Smp_005080	829.277669240546	706.430776102545	5398.33142169514	2199.8481180273
Smp_005160	600.024755164391	1077.74253905779	1115.80956504703	1295.69908268001
Smp_005180	854.158214926962	786.309448037672	2962.12183855857	1424.65637434103
Smp_005190	194.770105439518	261.156368931813	188.671830270285	242.065608651712
Smp_005200	337.543909568505	504.679516436076	424.402449783224	651.122316203435
Smp_005210	736.561769661684	827.018700412388	1945.38703628563	2144.61702786305
Smp_005230	8303.25859891429	8973.38899316064	10900.5286302501	22632.1843837496
Smp_005260	1123.49357098742	1177.42250513918	2670.29371142703	3383.24748173199
Smp_005280	263.439194182757	177.626611955018	1089.82266138833	291.396456495902
Smp_005290	1331.6928890797	1113.40469734063	3318.58981078075	1920.75420356652
Smp_005330	132.489068070644	127.782765957918	844.470108325519	398.630818636184
Smp_005350	5692.0308631787	8827.50120121711	187.090437845151	1274.37757683842
Smp_005360	18.0563914345689	25.7169344916368	19.2871151112341	12.9905537084184
Smp_005390	338.039475627569	303.241302331387	368.537932976208	335.607909507378
Smp_005470	7.47247791374383	31.5184976172114	2.70763166371971	2.41477479069945
Smp_005500	42.8072955644268	30.3357170477282	45.0882901169563	30.3241738412155
Smp_005570	87.280391577063	100.681526770909	594.858893002811	401.059714258256
Smp_005640	5.33434959197993	8.50346814995636	8.68041798688157	18.6837778874964
Smp_005670	805.922690491343	996.357868706299	371.467393385376	324.323114013547
Smp_005710	32.2754632643053	49.2399009878691	2.6064983319039	24.6731557084078
Smp_005740	2.36519681621334	1.96296081708036	3.31826661085852	3.2188638059664
Smp_005780	691.697396713721	619.088736806266	1033.60299143711	777.062300486877
Smp_005790	9.48647420840251	14.4493926125693	46.5895150270025	39.4934401753601
Smp_005860	13243.3416464898	13533.2852581521	18040.4685307524	24876.6661986101
Smp_005880	827.654437101948	718.88531660562	164.485840485482	611.779682831464
Smp_005900	1116.10617671812	1149.50170213386	790.203970778698	553.727871537665
Smp_005910	602.775097027241	887.883178939977	408.581710170317	987.550178852118
Smp_006000	760.454116942731	643.167298435369	2568.49016861512	1329.15342254954
Smp_006040	4444.9940994925	6464.59675396212	2672.21153689787	15337.5076333477
Smp_006060	1802.21675885335	2254.85261824472	1908.35635220104	2539.85296157197
Smp_006190	247.311789985504	607.20159674297	1138.45013856883	1391.20100212476
Smp_006210	275.307817734189	438.158892961287	544.629048734228	712.662103345151
Smp_006230	112.28495838613	166.853569063118	120.543961363403	109.710214667753
Smp_006250	233.521511596818	362.968500221832	547.264020065963	676.930009711022
Smp_006290	28.6916534996367	28.9255919026827	26.5386010837702	32.4639256986588
Smp_006300	28.0157016910844	63.1165409576819	52.2750425650463	65.1136373872954
Smp_006320	998.387261812581	821.692947607685	1070.20908933169	1067.02540382926
Smp_006340	543.535113695806	952.482656411367	1130.44481788324	2090.46202992079
Smp_006350	35.0908512952945	68.7469238677148	201.010790176786	117.238847460791
Smp_006390	10012.5028884927	9333.65171009985	11873.2628303497	7279.2508724981
Smp_006440	387.833941365991	369.799318098713	2272.03889116763	664.699775737758
Smp_006520	1.55852556582433	1.53565167193527	2.66549771245836	4.01172227830145
Smp_006550	4808.40342654351	4624.45444208655	9323.13525541477	8578.71224133382
Smp_006560	1351.03807543787	1241.30299516428	4098.42827368307	2389.94068536756
Smp_006590	188.588426801887	167.359442723201	397.387574768839	546.635362334626
Smp_006630	74.7200262556781	56.6148384815164	606.058135246792	288.913896178477
Smp_006680	463.133407286696	466.74328809251	453.469070028561	521.915768996293
Smp_006690	536.604497824592	412.798936117663	997.200242290874	640.686470105114
Smp_006700	55.4623024221043	63.5821142248427	245.945013850983	236.119145653632
Smp_006710	420.707631709897	341.237017883131	747.965307386625	1403.10293926815
Smp_006720	235.553752675875	140.805165225093	173.557630479854	91.9456091649175
Smp_006720, Smp_125840	1925.99221089599	1555.77284359527	1126.73176982381	1128.87888401163
Smp_006730	2686.45608302569	2115.5200758638	207.785410639406	546.668520481938
Smp_006740	432.702009426536	375.74100881499	397.699311233883	164.932830329557
Smp_006750	1094.53733418814	2046.25285156862	595.531156360018	1080.9410654625
Smp_006760	316.678336752534	326.985715477973	71.4873634850515	65.088107977245
Smp_006780	3234.12820426675	3679.49343876551	8415.59402382936	6641.65776888096
Smp_006800	7.59979076331778	9.21174201984969	18.074114959068	16.0458208514285
Smp_006810	2.16660317858353	2.01033811666961	2.9157938354173	2.61838718467327
Smp_006830	2517.88230703758	2342.26146723982	8995.82384152554	9451.8631091159
Smp_006840	835.142706613834	692.057121053574	923.568216226191	610.252089997708
Smp_006850	787.124677008237	636.991322046053	2379.515266267	1883.45165591669
Smp_006860	1504.95892672055	2186.69827938291	8.28195599856781	187.687818698686
Smp_006920	14.599935565763	16.3697470412467	57.5426474575269	25.4102444437525
Smp_006930	244.978455091185	525.064692251618	301.719881132237	836.612129707852
Smp_006970	51.0579009328838	79.201366787767	44.5546669820496	142.611728556066
Smp_006980	1453.9432533389	1952.06504366814	1930.34197610526	4675.34335353091
Smp_006990	97.2070801318089	99.1946640035814	748.776174679095	276.49911059428
Smp_007010	13.0447648709671	19.0845692721209	43.0706083977329	27.8776932477223
Smp_007070	11.312353171902	20.8120736207262	3.09747506668038	5.58485963988436
Smp_007170	575.033692995005	642.121939366999	975.399069231249	725.06206425739
Smp_007180	231.963182545643	244.331816126275	452.62324497491	369.702256306498
Smp_007190	135.716223242115	207.712525774827	397.095131552412	231.397233238414
Smp_007210	18.5837011115363	19.0563867480697	25.9846205060755	36.2760833600939
Smp_007260	2710.33507525346	3325.37649166207	3863.12392975134	4102.78552462816
Smp_007270	2230.75923577596	1733.19163394615	2426.74211207916	2140.87651299806
Smp_007290	344.909949340034	201.452432596832	172.061883798124	316.972548585549
Smp_007300	27266.9578575929	24734.9995530136	37677.0081053116	50007.1653666742
Smp_007330	103.075873867822	121.619518883862	161.503248010607	121.979613085515
Smp_007380	1023.98421988619	737.355081192557	1662.16858268282	1342.24732170278
Smp_007450	272.594499815106	279.243110267952	306.067537600338	911.059823815876
Smp_007500	2262.95941028946	2522.18140525902	2702.5496140055	2918.66417192238
Smp_007510	614.212547487429	742.010848281258	1885.4279209679	1385.76003098186
Smp_007540	1115.01946195015	868.627264799531	3276.445673867	1664.67505376243
Smp_007550	330.672125487574	442.108244397148	1004.50781394986	1120.53145453073
Smp_007570	8.10405541361806	2.60892449567034	2.25784766982648	3.3141634121396
Smp_007630	4287.96259997682	6797.76352348876	10725.6113857476	8407.22725426032
Smp_007640	160.292743963023	238.263540372929	185.11571138934	164.367003987124
Smp_007650	3.83152897365224	8.91067638812519	12.4432644210189	8.01379600122589
Smp_007660	84.5169165130991	118.486947900214	167.696239112881	122.042915069353
Smp_007670	7.42143865184055	9.65700096140373	4.56908018063867	107.306734920171
Smp_007690	53.1337051636706	44.8342751979228	6.46571618762839	18.6326674517044
Smp_007700	5.90885920978131	13.9784131873174	20.8046487708207	32.9475150051452
Smp_007730	579.816420655158	1306.80651013524	1256.79173108341	2204.5297817035
Smp_007760	155.742207298738	175.450884064563	9.81308843236066	64.7219358529308
Smp_007770	3.79997012554859	13.028772357407	28.5584844516916	17.1139311585936
Smp_007780	2.50690516100566	4.58076003616025	19.0416082441396	11.7653434882047
Smp_007890	944.509067006152	788.780829091636	3308.64919595262	5023.97658493077
Smp_007900	18858.5906108281	12581.592063755	34402.7556609223	28993.0146640475
Smp_007960	210.127929968753	222.379152356703	431.97626739654	384.363018143729
Smp_007970	384.553778308028	335.805174850427	745.660107063786	509.328109481741
Smp_008070	25459.1615841602	21733.4071398429	29442.1745460207	28132.9843901231
Smp_008120	944.245550296694	915.471658602347	1343.93785145392	1428.2952616018
Smp_008140	1186.90813914492	842.085235751832	2533.38029581193	1460.2380872544
Smp_008220	38.4659484797193	66.7017391624741	629.863963810641	576.753416952394
Smp_008260	127.960960988237	103.77050197279	174.812214429105	75.3434759789302
Smp_008290	9.0060075066712	10.1341370176163	41.2820807928759	36.6496492743364
Smp_008310	2015.07461857673	2211.60205082614	2505.06533101419	1211.26047899567
Smp_008320	2486.0470209428	2544.95308283109	3009.84067835617	3184.68100324648
Smp_008340	175.230573695413	133.851678599073	227.870210368307	633.79046545998
Smp_008360	1019.96471861671	675.627580304543	1970.14434659254	1248.08298037543
Smp_008400	155.296392471664	94.03139918633	192.96714930155	103.339126062795
Smp_008470	377.124320909199	417.704767254166	714.756098980462	512.90857139684
Smp_008490	475.745442835634	1386.89504397593	51.6018241509945	452.646718474424
Smp_008500	1884.12083168613	1600.22382723423	1159.56083196839	1237.50334746697
Smp_008545	2674.55180671815	2910.9682890677	12455.4724940585	8360.72620177984
Smp_008580	845.201491425321	881.528215996484	822.822621729235	725.414461838503
Smp_008610	2322.57769990808	2273.57759881129	69.2147293759693	136.650620421081
Smp_008620	39.301177755877	45.9894072275533	23.8673978628444	24.384139108004
Smp_008640	2612.05476281098	4179.25643248849	5.47288429105584	63.8621908267562
Smp_008660	1036.16688933031	1106.82713751955	1021.51758573055	237.546864066802
Smp_008710	51.7708053135473	60.8488731007081	2.91973076660026	9.16904021957393
Smp_008770	1203.46095460629	1091.687544241	2434.9214363615	1768.29429614891
Smp_008830	938.752370749458	1064.81487970269	2925.57818905779	4075.75189130892
Smp_008860	47.9897811684321	47.2016466701886	17.263937095525	17.706680131227
Smp_008900	2480.61599504522	2925.98438156005	2713.3257219571	5687.16571618232
Smp_009030	128.597817366199	129.046701884458	1723.25195609925	1479.99117283007
Smp_009070	42.1327034322594	54.9949773852496	66.8416433332741	37.8986752449198
Smp_009150	665.754398549514	648.533027401099	2019.82879108577	1280.98442844013
Smp_009250	39.1714226068839	29.7207354487712	56.0190705663046	30.1770334245318
Smp_009310	15843.0181849174	15487.9596049668	27247.1549075099	31914.9041882447
Smp_009320	1.67819061854348	1.64298406743153	2.71140161115796	2.499651589059
Smp_009340	179.863478669586	137.754309598981	399.17125035821	161.06757343387
Smp_009390	13.9309778596964	13.8138464950654	58.9842415554587	26.9924365515489
Smp_009400	119.492136549966	136.589836654862	211.945988447586	211.633918738107
Smp_009430	2227.92340311826	1720.33622953982	3965.1616574253	1657.38561562221
Smp_009520	22.5617231975075	12.7074343043342	52.5242923154832	29.0198129231279
Smp_009530	589.952832727445	530.576380276847	1833.26037893177	1523.02472510267
Smp_009540	10.6872981964203	12.6114227808061	17.2544999483279	14.7369860408143
Smp_009550	80.1057424088807	121.217045051418	354.73859168432	711.778484573593
Smp_009560	65.6739630725536	82.4241563783169	114.571906516789	161.266811600573
Smp_009580	95204.1207528863	84017.275983354	31017.6867385768	74296.3490300763
Smp_009600	25.5374237940003	75.280652606615	2724.52492988851	2543.63839420228
Smp_009650	3084.357479078	3342.50820185923	6352.81011784653	5882.44271991189
Smp_009690	9717.21401057386	12210.8542168859	20499.4629578781	21641.8144607642
Smp_009710	271.853134800662	591.676240528902	757.853709303397	1064.14140224583
Smp_009760	32230.7164771086	30570.3539345091	21372.0180487399	36994.1549273176
Smp_009780	22762.359708008	17238.224855942	17738.2335521185	24036.142970384
Smp_009810	1.80275116675649	1.78378807136032	2.6927304147778	2.47761757731228
Smp_009830	2238.24726999661	1403.36590838641	2587.86219684363	1767.79263439827
Smp_009980	579.542532727173	444.394760826742	1621.03203288558	1605.23437928637
Smp_009990	67.2775653500932	88.9079942027828	104.809751713008	97.5107852613779
Smp_010000	1925.738507743	1253.19323220911	5130.55850906011	3240.60697071969
Smp_010090	548.47834781702	446.240293488036	1010.00794909238	1036.77784963139
Smp_010100	727.046633211637	802.618477396515	2130.44980680877	2923.25742775594
Smp_010110	830.244702668358	685.509096084006	1878.71097243485	995.386759756535
Smp_010140	1256.53037475864	1205.40630048035	3301.51131016821	2401.17259617083
Smp_010160	2857.38946254645	2078.78409063862	5705.12618834069	9324.45574619268
Smp_010230	140.461816143693	145.793426581147	142.253520042561	145.158353304072
Smp_010250	14.2451237224013	14.6931136589994	180.160914436117	22.2514589211145
Smp_010260	429.558776708761	476.440670015033	1568.65698034594	2088.66781164286
Smp_010270	605.300811637084	499.856483017333	2342.52384030138	2478.20570213961
Smp_010280	638.321107238304	358.059373939006	160.078081983053	121.713645820424
Smp_010290	83.3067390551165	87.289864655515	108.500188410696	92.6562956367175
Smp_010370	2153.04815730729	2054.52332914617	2360.10540472496	8623.50297665342
Smp_010380	923.760383362692	886.064985654435	1137.48240643438	886.040109024262
Smp_010450	8.80109027659704	38.6115956146838	2.11758651972018	1238.97365470597
Smp_010550	37405.9699637063	32396.6313071257	2.50669031583189	9.77017868183851
Smp_010620	276.368631024302	404.084524443565	741.577347443464	739.60413479573
Smp_010660	55.1284624456588	65.607244337387	3.4878215576027	30.9393219210327
Smp_010670	145.875997337142	221.099269078234	14.3790510249037	72.2194712609981
Smp_010690	18.5442035924085	33.7894375115415	20.7126662391447	14.5162397503965
Smp_010710	779.219760521614	753.34342132306	1100.81974684543	757.712800262672
Smp_010770	540.591130950537	1048.99145792294	283.485140764396	875.228640928551
Smp_010820	1728.91941712057	1201.21621628799	69.0695204476001	173.161723209077
Smp_010900	2694.94220539236	3219.04262563396	8970.76077904553	10778.8888915721
Smp_010930	332.05849095198	391.250051000183	1366.15342436316	1053.90155976816
Smp_010940	4119.50133096121	3468.90238188581	5473.01488889364	9488.4269646511
Smp_010970	2.42366131973112	3.00754471747136	2.39785606875082	2.19010154578536
Smp_011000	431.074676860458	424.306443100829	437.776978437458	691.26017961718
Smp_011010	283.687515268966	237.982227326574	1313.53190249379	631.964687755585
Smp_011030	37.9127908789553	81.2423860132155	723.277803905558	1443.24557641527
Smp_011120	1917.42817838143	2092.30516149687	5473.01681880854	3303.74753966806
Smp_011150	120.680123403287	95.3398359080549	187.389248684711	152.257999070022
Smp_011220	183.736088851372	277.148829263434	171.405879866681	238.143849408324
Smp_011230	151.671465951342	132.511233375475	147.486786205775	109.143579129878
Smp_011270	10927.5805014456	5544.14450190673	608.013285118533	1830.8296388369
Smp_011450	27.5893486658613	31.4188803256019	85.0764260724731	50.7728646776326
Smp_011560	4066.54605944337	3289.64713673281	236.649034966312	1749.15707942691
Smp_011570	12692.4726959501	15755.2178196926	26612.5312063491	33896.3169244762
Smp_011590	294.344459220247	666.020519035957	532.188604120534	567.866352661757
Smp_011600	67.8966851802922	166.220584096503	174.911128559118	417.296971275078
Smp_011660	3.89802155010351	9.72929365336801	9.7674835557969	15.7349091265143
Smp_011680	2625.7275885769	6296.28426996522	274.006878079361	604.668591153828
Smp_011690	9.07785157441705	4.66093431750927	2.7084622600416	4.66707238337722
Smp_011700	24.6664428809923	25.4493278124932	2.90239324607462	5.54657781313769
Smp_011710	1126.68026041825	2375.2192089143	2701.38009524471	7143.13172153739
Smp_011720	720.909381317253	1163.12097204683	1294.04756402806	1549.09744838476
Smp_011740	235.292534584294	388.084514010991	353.403648602069	3607.92673894953
Smp_011830	4288.78918347651	3563.57786617112	24.428691712116	270.740488726112
Smp_011860	714.541963782398	1390.36074671793	1094.09690513758	1513.06788844333
Smp_011870	5.19977799243538	3.18397005291718	20626.4956423914	334.201099844197
Smp_011960	1.7188610114567	1.6401363758061	2.63821814541014	2.53575904170561
Smp_011980	120.628009467319	166.841465447771	264.075342635523	306.515723999792
Smp_011990	341.907078073125	644.994925238267	566.765411209826	2989.53030938689
Smp_012000	15.5155342304623	7.20622116540349	3.24977406721589	3.64613799127242
Smp_012010	1.96945818358644	2.09991857207081	5.14767676571247	4.08623886280508
Smp_012030	83.5691319393363	168.842801982209	147.383878970629	176.375528548161
Smp_012070	683.933465385048	1024.28302998421	1103.82835595358	2695.76331901589
Smp_012110	2382.54128696487	3750.63693123726	4499.58053792482	6085.38681206097
Smp_012150	253.096918964263	373.079080206363	327.449050026541	491.931980537277
Smp_012200	199.543318616223	507.666774002245	721.927125879912	500.682463244059
Smp_012280	1741.85200189011	1606.71439784501	3821.13948981727	3102.91837744008
Smp_012340	598.483715226373	533.276529237445	1623.77597419519	1357.20877925575
Smp_012350	727.437728606368	835.05807634012	964.302898262604	411.010641808293
Smp_012400	151.802084703924	161.078804430397	1127.04374776856	160.684407903782
Smp_012410	951.573036422916	1047.85467310357	2927.12666224627	2273.98601870716
Smp_012440	722.107091451103	995.420279076671	62.4848882170786	154.68536896205
Smp_012450	2702.44855170964	2378.1699244669	7214.315521083	4346.18149518451
Smp_012460	210.478680597952	276.894131881532	327.695075899893	216.170196689539
Smp_012480	40.945019376003	69.9532916046954	246.604732525167	308.704955602972
Smp_012530	2.66690050225431	6.64589274975992	32.6296467395933	33.5551569471573
Smp_012540	323.72574236934	332.299915675005	669.837538979864	1014.515835891
Smp_012560	598.777255855873	485.135709052167	494.607443041768	537.763348382725
Smp_012570	334.78378731847	394.279902953102	1204.64515589376	1166.15186899147
Smp_012580	276.530055191604	395.485560745319	42.4573755094733	646.939501031951
Smp_012670	185.56713725866	146.250526207885	321.934900552299	1810.13648530814
Smp_012680	5.80649806293989	7.40147504661518	6.17756163164549	10.6498391555645
Smp_012690	708.253599128369	544.186442119602	930.685410542094	1748.09660911
Smp_012720	132.668962348752	191.474947957719	413.951106869217	120.611231368692
Smp_012740	558.927855736408	409.002085494764	1617.89845350402	802.592040531511
Smp_012750	9102.51083083596	6894.88558592128	22966.8897458552	19854.2947666913
Smp_012780	59.6789147574352	68.3150084233707	22.8295906644068	118.973618749674
Smp_012790	1657.10963658726	1385.96964187834	2715.2163865903	1708.05242297475
Smp_012800	2440.71281636622	2261.04387220211	3350.42958899043	4429.21711969107
Smp_012810	641.361389633643	499.904134714741	2.71650421890409	27.8556379089457
Smp_012860	449.734951627409	343.738494704485	1531.88433285658	549.64747966218
Smp_012900	193.994890779187	163.737379142333	217.958766102736	155.770695897981
Smp_012930	356.335790221583	339.478754753701	1437.91585001346	965.355580867191
Smp_012950	2.45573017865626	4.86262892880545	10.761922195626	29.0738850795511
Smp_012970	20.9092470706011	27.247517990836	48.5269039231592	34.7550707432093
Smp_012980	639.217813313935	679.215738035652	1918.8581213185	1309.51164984476
Smp_013040	4939.00280156411	2532.66488656914	864.3771098518	976.81791340908
Smp_013050	230.372047868663	185.779979749964	128.33255337603	233.336880968
Smp_013070	643.432613864007	608.147092017773	1020.89786823071	799.584488374082
Smp_013080	38.040149034459	66.0714297896718	24.0894809968925	790.613132937813
Smp_013150	102.111653577952	81.3738509367832	288.389757634401	105.613154790422
Smp_013200	15705.5572814943	10285.1889162147	38271.8479432756	28852.6473378931
Smp_013210	2.2726525470345	1.94872280621555	75.2918847181574	28.4652086387779
Smp_013300	2837.27756294694	2955.85599940587	4217.54685738862	2002.4331858855
Smp_013360	980.198184455831	1154.3969980739	3643.57867730508	4284.30584912275
Smp_013370	1353.07171550886	1243.81925080551	1706.43161389569	1115.46927146104
Smp_013410	283.259155723043	199.112520040735	615.330477345811	272.160897386535
Smp_013440	83.7913296137706	82.2328188245339	29.4901070988631	41.3291278075028
Smp_013460	1936.26609943934	1554.42208724901	650.553283091222	1494.45053138111
Smp_013470	19243.0340782696	13604.9798814372	39485.2936245235	27287.7501758604
Smp_013520	348.849645318874	269.960249081353	563.831937998642	624.509545981108
Smp_013540	36.978078014502	1.37794846609965	2722.45491650016	24.7911963983244
Smp_013570	159.527195637321	47.7633097807519	315.811945051639	98.4286622918117
Smp_013580	981.075837937902	1068.60438280814	1191.47559543029	3178.98842658034
Smp_013610	7.74302224536667	21.0692979826968	28.3259729965443	89.7071862746807
Smp_013630	91.7731161184117	85.5222454428039	7.38530771604723	26.4613300746825
Smp_013690	240.767954394782	176.248054416353	502.680875509684	645.700026896993
Smp_013790	486.004708452416	524.280576618222	841.264492732257	2677.24634790156
Smp_013810	111.881344812039	103.301208226882	297.906815800325	347.895961695526
Smp_013840	503.863642931334	687.347420049564	328.004977332937	604.195822946358
Smp_013860	601.370616549763	1028.03506301789	651.488954522081	448.405488945202
Smp_013870	502.619513801394	639.093742639383	363.995749704051	222.973408630371
Smp_013930	611.229802867271	566.631069257229	1184.44050085095	640.652097504325
Smp_013950	33.3185490533161	43.0092279520491	32.0562578733536	26.2403114935088
Smp_013970	51.4222846286197	127.616110271804	2668.72254622018	4034.25201708876
Smp_013980	14.4850906966725	11.0715398608198	3.20768625066339	4.25828700257501
Smp_014010	2979.55778928756	3063.74539144574	2004.69599268148	2190.16626581821
Smp_014020	539.6814449952	460.164456756816	769.715808479311	575.228603935877
Smp_014050	72.0980589003488	75.1523405813752	139.428576759865	108.903993291079
Smp_014060	401.026553815565	388.063368374011	607.035999577035	685.644543758815
Smp_014170	284.527851787058	498.853529280069	106.286778605621	284.329518327821
Smp_014210	6.26078410153005	1.54445144440501	2.73022435097168	3.82216545276825
Smp_014280	304.745671413612	384.031752659876	512.792069012154	429.687832343519
Smp_014290	23.7107773817481	41.1885019165575	35.8489174804036	63.1073156255602
Smp_014400	298.631522714352	351.116260589805	497.147757661918	635.208840794345
Smp_014410	217.084773922056	182.084801733207	356.379906240562	843.54434551969
Smp_014430	4.26821152517212	5.15739716020712	3.28144645336635	16.914216477257
Smp_014440	5.82620480604766	15.8041153947256	22.8885711841281	25.5756161496785
Smp_014570	9543.30820990577	5153.85871827691	4.95349336173283	56.090194795991
Smp_014610	688.560618347779	6.59455805116557	46.9980337120271	5.17318684971636
Smp_014620	418.313790483076	385.239920980372	1051.43890010585	415.390562781503
Smp_014650	2.06409876374389	5.2956708903103	11.9659899097136	4.35640240498522
Smp_014660	4522.62572934558	5663.31882153251	2504.24219283276	3883.14469046255
Smp_014670	1208.41740826394	1876.61432546053	1524.58469373374	2522.0607972308
Smp_014780	116.768329766966	172.512941224869	343.89964908506	210.150999833949
Smp_014800	1334.65682919453	1507.26510055476	1992.14769407702	2103.29945791413
Smp_014820	42.2720942583774	53.2703530815092	6.0271991037562	72.0788734602096
Smp_014850	3.38502064588868	3.98357318564031	14.9484040949313	5.02609753463205
Smp_015020	138.43431903405	108.802339176569	39.3973856701425	190.927381624783
Smp_015030	921.474853780561	1220.44115705475	1119.46532406611	1278.07732758988
Smp_015050	730.315695222102	924.587011867424	294.82573735329	294.922367255867
Smp_015070	1767.43844925514	1778.51139985143	839.749023736392	1050.40084198817
Smp_015090	735.909260874964	847.979141558117	2108.31345012432	1662.42724337249
Smp_015100	622.761354332935	305.782676844017	31.8507260424874	43.0924209412696
Smp_015190	9.90735372759394	22.1136587380086	31.021167526347	490.456600809761
Smp_015220	236.361634908483	311.183036516125	970.273098309213	898.03659260954
Smp_015390	2.51441439566887	1.97208317927441	3.10866239986044	2.68069799442536
Smp_015440	8.82986958721113	9.15340357979485	47.4534848647432	13.3868795122253
Smp_015480	45.5757010729571	321.465616106679	90.6113369750151	62.7732153876568
Smp_015510	1374.837967861	1321.0322439194	3473.95106443427	3637.33124058134
Smp_015520	30.7413237815246	34.4912665879808	82.1940124720746	35.556671446239
Smp_015530	4306.56389926925	4324.89731769088	5406.79971655004	14403.5586684133
Smp_015670	215.892557179012	325.553195092511	2.68310806040285	13.487609574903
Smp_015690	220.578176514052	180.045544740787	2575.37961172137	716.714076751527
Smp_015710	174.707759666399	166.238550419595	565.98411927638	287.391155453239
Smp_015720	1711.01042753013	1503.23198799899	6354.2320903347	3896.70565762207
Smp_015730	6998.03601944727	7345.67739615472	11902.8776690527	11402.4224341041
Smp_015780	84.4516715640941	62.6813022103795	118.480030792864	83.2467457640781
Smp_015800	761.695319534154	647.590390493185	1755.06727072503	1313.64998909497
Smp_015820	1.92121822141496	1.72949004690776	3.32002904045244	34.7867415972209
Smp_015840	117.759080274786	103.647760361983	322.44738435855	393.690984940689
Smp_015850	592.891457246679	487.659716521989	1540.59352155644	1712.13088947887
Smp_015860	422.517470165594	400.843317043962	1195.58598747871	861.339694978026
Smp_015880	144.181450795888	145.598219435876	275.219408122192	154.347090917442
Smp_015900	1263.57951018596	1299.57513477195	3196.25759961065	3119.36856811113
Smp_015920	2.38757308783876	2.03847562494585	3.01048399953342	2.86458830668285
Smp_015930	1.74455149700357	4.371488714348	5.60629077222989	9.7821612601908
Smp_015940	200.098940746044	233.087767396	293.617723461363	418.721731183582
Smp_015980	1291.671799282	1066.56209467533	3342.75086719724	2788.8471081789
Smp_016050	306.376078629345	477.676049800654	719.302669648519	1604.04181446999
Smp_016090	16.2476303082507	26.7325296981761	68.4338978273071	53.6191741291212
Smp_016130	174.20160364856	163.387457177609	407.35736908158	292.026413160428
Smp_016180	20.7538701298839	26.1131621880023	72.9450024495706	118.337663919227
Smp_016200	1736.33065736906	1566.99605317438	1822.86101997337	1465.10960376535
Smp_016250	252.715512792751	209.892879572162	704.603719941387	1160.36520977131
Smp_016340	1566.14459133351	1671.06536403425	2494.27952389995	2477.20029837218
Smp_016380	6.2165728394933	10.2984728120501	74.3285079087119	89.970907642518
Smp_016390	5561.34700822295	7013.04339675352	3488.31990296472	2679.89261232482
Smp_016410	133.659913345011	154.279772870603	759.385923102987	276.24097071048
Smp_016490	27264.3751350026	21876.8301016224	27.9599621066378	798.333608639872
Smp_016510	1688.96236394453	2003.02451375708	1036.16902919773	1586.41568636535
Smp_016540	1.7849452165012	4.4661625841202	22.0221544082086	121.243031431847
Smp_016550	83.9880735429525	90.9532790255778	385.355003752254	229.063002359244
Smp_016600	45.6286177547863	51.6766121836262	10.6907282970652	16.2414858340357
Smp_016630	1574.37072649234	1750.49771732744	2419.2769405585	5259.39677840978
Smp_016640	127.641591249485	139.621004142166	340.554765404514	112.261823276369
Smp_016670	1301.00926599773	1082.03873067454	2165.19214567236	1850.59598232285
Smp_016680	13.9679831982041	9.87611897308387	7.8656002198428	5.64678324760144
Smp_016780	795.358002454934	1353.75760414004	6.68922124454359	39.4747653547217
Smp_016810	86.227642125173	88.1300762168411	169.625972132772	206.168404416401
Smp_016840	42.5179541295962	68.5769680058263	109.041362813635	173.634331767277
Smp_016870	8.34018246999256	20.7858549273784	259.770612071911	314.484281610836
Smp_016880	215.997304694874	170.622392693381	718.549377192894	457.96743798647
Smp_016890	600.045274553028	647.147840510896	2325.32460831628	1306.26160712372
Smp_016900	386.09170666013	336.547920219334	4136.27882517046	1319.52429004612
Smp_016920	5.31865954275093	12.6530100448134	39.3575609898515	38.6328186906613
Smp_016990	1575.48739115668	1309.55730360829	4704.29543325271	2508.97934192287
Smp_017010	1249.95429778075	1861.45165751962	6034.14451933349	4106.34561219429
Smp_017080	65.8550823228788	74.1539206822775	173.228193418663	181.131720634891
Smp_017090	493.540525901576	393.929768150493	813.279100589771	700.46324365815
Smp_017230	41.230967687416	22.5781894163443	46.0279917404697	40.7197502223204
Smp_017280	8272.79545222092	6373.23108367651	30385.192564082	15646.0262929789
Smp_017290	476.693441404604	417.496871905475	258.934708651867	645.674935456847
Smp_017350	513.817473537692	516.676334882953	12.8050004105647	43.7058752807693
Smp_017360	2514.30684408739	2693.87719920973	10048.4351499451	9255.35664228488
Smp_017420	331.872793618776	762.895389271902	19.7934489805547	90.3833207633464
Smp_017430	20255.768905961	21766.2951624681	12409.0396792344	9874.45698711134
Smp_017450	2935.85094230964	1813.26310280261	7240.3287280821	4404.17406971054
Smp_017470	874.00253754555	704.264238628621	1075.45891460753	1041.03070588713
Smp_017520	39.4569700979277	50.6388878590716	24.565153571441	79.6260487371153
Smp_017640	249.496566972852	248.102295168315	1087.76095952754	1051.17458312882
Smp_017650	431.741437088653	548.23230715225	1363.00098336714	1409.60069691149
Smp_017660	7.1989733990521	6.90830075658863	19.4212207513365	8.61854455495316
Smp_017670	5.67784521275344	4.14073981428249	20.3108838898768	19.3904419401257
Smp_017710	28.2690295313932	36.0711379510397	37.8034885984383	15.9415195253297
Smp_017730	52.277614072254	124.569955310644	4.7244087779846	38.7774903321265
Smp_017750	12.9089931126403	15.7587480531509	30.2661637250794	21.2502119946158
Smp_017810	63.4916222957093	69.3159860149831	182.098139914277	349.826276090246
Smp_017830	2601.64843396767	2603.46792840536	3593.22448595421	6102.58861490734
Smp_017860	31.5736244429158	27.6617981790289	533.786308878178	33.8007065717193
Smp_017870	27.7435282280543	42.2451293659342	5.49824110681687	246.931171551893
Smp_017880	1802.72329659151	754.28594575051	324.876615964437	602.316899038074
Smp_017890	1165.14242617811	1162.72100366973	3726.072979813	2837.89698749291
Smp_017900	31.0829678859167	30.4168105969839	39.8152228136404	53.6292487364601
Smp_017990	928.609860535214	598.36103280413	2024.94267124378	1127.98342523451
Smp_018010	14.6834144183503	19.2326968499142	407.079563506799	82.0199771501002
Smp_018020	2744.40142099235	2540.45265029327	5678.58220362469	5489.75070066773
Smp_018030	241.785297436795	182.822014492215	603.629029657853	478.430463710277
Smp_018150	109.814785186378	59.465706573562	115.866084516183	74.1388152018289
Smp_018160	1371.16287191606	1146.93584070421	1524.96216861218	3336.57267439163
Smp_018170	9.1438706621742	9.46531350872019	4.43208417233417	5.06883099333282
Smp_018210	207.478414410966	190.056500359804	244.958381112647	121.715600686778
Smp_018220	562.518249071623	686.99171599904	1668.21790665697	1436.84864942154
Smp_018240	2507.5181295112	2551.08771241349	2752.14047557644	3539.13078320566
Smp_018250	554.499326421323	631.043198748427	5.77296227737809	106.004972454742
Smp_018260	429.797040503893	548.64386632559	237.454628683183	295.007951549012
Smp_018280	395.011240969597	452.380305053528	4088.60030303669	1998.67151182883
Smp_018290	1235.50302160084	1650.61049572962	15856.8288202806	26363.5803958547
Smp_018310	2245.7053049718	1672.18306908134	4914.68137750687	5425.36188098459
Smp_018360	972.256085191071	1188.02262730942	1585.08736601795	937.390539171127
Smp_018400	288.216086120005	308.918981386783	866.184478106022	281.014995426124
Smp_018430	454.366718793642	470.609123441772	517.668182377798	756.133911841451
Smp_018440	8.2735673247972	6.09318337761605	2.86267292026547	5.29571115833903
Smp_018460	44.0498638243218	36.4142225606351	142.225011624932	48.0432521678444
Smp_018480	45.4446375913087	32.9618089781594	79.7557549319275	69.0979014238852
Smp_018490	24.2830308785002	28.3937174312674	107.031831334587	125.329192257035
Smp_018500	13.05683832178	11.667610261619	48.5759176615704	23.957724461906
Smp_018510	15.1025609160095	9.07384581905791	12.7774237578733	10.2982067538426
Smp_018530	958.486628108947	766.409262458424	3447.11770740654	1301.70233289923
Smp_018550	3392.65558455251	2760.8366270393	977.133758058793	1830.34633855166
Smp_018570	33.9237640044407	35.5746254520542	73.0987016961766	54.9702944062487
Smp_018580	42.4645672837721	77.1651011233129	343.551452663095	502.610646722762
Smp_018610	1964.93057010278	2191.26618530332	4805.84315792365	5954.60379476552
Smp_018620	550.836010791542	505.480463463954	1274.94602845444	974.845541891058
Smp_018640	64.991353138983	64.1662498989219	99.749392627701	140.035354042852
Smp_018680	741.753247249689	840.738356925755	706.800548509185	1290.84220499827
Smp_018710	296.782835372596	252.972642806901	164.027267268896	136.468886239648
Smp_018730	2.15966677961381	1.85323129948255	6.48891288119357	4.05766437511347
Smp_018760	603.595016736272	675.919473858168	1474.70729865287	1467.26000833227
Smp_018790	201.809544249013	101.390652126107	89.0956181230444	53.49042210178
Smp_018870	7.17283442332403	13.2669746020709	10.2433316037315	65.8164812535328
Smp_018880	6.59381523906504	2.06810121885256	2.64729447094254	2.76028982930998
Smp_018890	18068.5398661762	824.462035204984	10849.1170185883	24459.0043894568
Smp_018930	230.960911502474	176.801345389792	2763.07382096053	2673.47709632794
Smp_018950	198.232135844619	194.24816206875	941.841718811499	681.590124919471
Smp_018980	2.73756354854355	6.36099936990118	2.85994018892438	4.64222216977896
Smp_019000	33.1712570049889	8.884112009086	43.0894688304724	28.1732148957307
Smp_019010	1789.64785217292	2187.77738851033	4850.18531919462	6056.50052138354
Smp_019030	6263.3990144999	4519.31870633323	1577.35666365632	1858.93968736886
Smp_019040	13.463753188099	6.93834935748071	14.6231415754559	17.070650796107
Smp_019050	1340.02503500272	1121.80199005905	7207.90806105917	7488.73185543374
Smp_019060	3148.85425853827	1729.22542791887	5087.02053377209	2775.29027909237
Smp_019100	104.499354893373	116.390613175318	254.368974960285	57.9554520542204
Smp_019130	574.523473948923	529.405130895627	1595.72684848335	1536.03718286736
Smp_019170	64.9809396177016	92.9963192879572	131.767212302753	256.6585293904
Smp_019190	294.839504833561	217.230026075579	680.331027665265	698.757799175836
Smp_019200	2.02679017897986	11.8175195092644	2.22629764509231	1002.63424297632
Smp_019260	1.97547326937603	1.92851762085917	3.46986971213314	4.33642559362951
Smp_019280	122.122385918384	135.892633684138	404.024498074373	268.232449554905
Smp_019310	584.004826315053	978.122502127743	4.80145138335622	92.0201738019759
Smp_019340	2071.58460486874	2300.53949309532	2024.91474890739	2082.38265126007
Smp_019350	6880.64268938408	4828.68558092297	34.4789925030881	674.582840343563
Smp_019380	705.228544759956	702.551198649457	1522.95928045558	1846.44831976715
Smp_019420	8790.7671413702	8870.8888601396	10602.0191076447	16437.8673961944
Smp_019430	2175.70979726913	2229.31730203356	4989.49523390895	2901.45642954559
Smp_019440	8731.15635962691	6555.92688587219	12804.5551297233	16917.1355996189
Smp_019490	1300.85442077673	1246.94551255005	843.630420696983	622.33906616269
Smp_019610	1251.8076222918	1918.35109380348	1470.97732194588	2029.65725190948
Smp_019620	139.038861227325	276.112347909738	628.41902152919	1249.79055194612
Smp_019630	383.513960913361	823.413200667984	1237.80939255234	2655.18671086387
Smp_019640	2734.4056024178	2760.4563994185	5414.31036036164	8775.14550466781
Smp_019680	253.657684884975	479.691443627649	704.999438301504	1253.35082817205
Smp_019690	3194.16370954299	4075.78342800596	14210.0987381544	12107.7581710051
Smp_019730	5135.31696695015	8952.27776916294	2819.94401453731	9742.01382450525
Smp_019750	4200.92287154862	7389.37816082373	8207.3228376146	16575.5228406051
Smp_019760	1.88133060487825	5.3402450674657	26.3090593565146	45.8929793587561
Smp_019790	13.2788116114028	21.6849366233316	67.7418072636135	53.9276605921895
Smp_019820	435.242108468713	606.612499355675	397.960465367796	664.219692280782
Smp_019840	2.06621275269164	1.97986043221296	2.88456083199324	2.550203886492
Smp_019860	2226.42713969265	2171.43756516519	4568.03317431666	3215.43994009762
Smp_019880	1598.10708797876	1357.73565324966	1436.64795297499	1116.82468148402
Smp_019890	294.84103829869	292.409080290039	527.199636947343	796.996993683046
Smp_019900	280.10634560743	288.678418888184	148.340927317419	130.699375795882
Smp_019920	340.554457585555	282.996257811039	493.112297117275	279.784103112644
Smp_019940	203.839763560801	184.544087316455	152.215903705251	111.562286476037
Smp_019950	1395.9581800591	1113.01002314999	570.100489561864	495.25805544414
Smp_019980	697.957317265977	703.155486370167	770.811525740513	486.173311952044
Smp_019990	5076.177625749	4739.48205822705	7835.17313237498	10928.7424815554
Smp_020000	176.017790816967	190.780882299574	98.4068774580752	320.685141500689
Smp_020040	1543.40346284088	1300.34905923234	4097.15142264128	3583.57643019095
Smp_020050	368.694232336105	416.843356653314	646.003385957352	511.274353925123
Smp_020060	287.634442090834	252.944618823957	908.567051150698	815.717885752588
Smp_020070	572.482873349591	449.432541682315	3.26026706572798	46.0706549160133
Smp_020080	1068.48148809843	515.150601467121	87.7444517353106	654.236399415201
Smp_020120	313.584433146329	201.63090160823	940.767644841411	419.954892690894
Smp_020130	68.6401776610128	90.6324798702259	5.70519888328527	10.3837890620674
Smp_020170	4.83743554363483	5.07744516465729	6.28284028718974	11.7640386008995
Smp_020200	83.3716117298291	74.7910854395185	466.521661156617	359.660458628565
Smp_020210	1049.68414766697	1052.95999943043	1567.47577411098	1180.94377869025
Smp_020220	3790.90840337121	2705.20676783385	4023.58437038775	4619.93554283228
Smp_020270	47.1418940089051	51.5924696038381	70.5732625106685	221.090153291101
Smp_020300	12.3283937821645	15.7619288014285	12.4458584836506	14.1229668683748
Smp_020340	121.683078628803	212.854703472647	4.0445400303501	87.2479379617579
Smp_020370	85.5601453402013	96.2197905856389	88.5851715050873	157.583179626566
Smp_020450	160.50603256852	152.907546234225	198.659582042222	102.007676491482
Smp_020480	58.874831342122	91.5065242149333	64.5863462922785	135.695669387448
Smp_020540	142.527377522967	252.150326552311	3.96960494991422	63.7187404153497
Smp_020550	126.617903075826	176.971216516298	4.79345200673601	56.7079599885959
Smp_020590	614.000252743662	586.725420172099	1115.29723897924	901.255323289035
Smp_020760	744.94277422033	910.077556959405	482.039507355759	1316.06026351095
Smp_020770	263.311059640348	181.839804366513	121.564400913888	94.5570182215967
Smp_020800	423.48126353488	458.344250429373	1280.17161093419	644.846349920656
Smp_020920	3069.72168213959	4247.09096314265	4768.73866938899	4832.93840592463
Smp_021040	1540.67042675164	1511.14439846438	2837.59973585376	2169.19888017156
Smp_021070	233.45824327079	182.356515155958	1164.25424410109	448.238285730828
Smp_021080	873.282317956044	778.547852268975	1783.35161792305	1266.79898893279
Smp_021100	186.348298580172	216.611374480393	277.552377610805	660.163090213132
Smp_021130	91.3328934916079	98.1978651390157	393.545670467298	142.797746263349
Smp_021140	22504.5354766111	15127.3535166416	40765.7768664205	44773.3268487692
Smp_021160	342.434048512877	334.567637090158	617.509302959541	391.279670359439
Smp_021170	22.8792004657214	19.6068648622228	66.2947372107267	38.746635645319
Smp_021170, Smp_133670	7.79884964441805	6.28213161974042	42.3002896967268	14.6752276155831
Smp_021280	387.263972191835	218.628012891578	94.8387057687444	122.306037916857
Smp_021290	46.7785332211354	48.2000966334269	54.2237978580782	35.713836223082
Smp_021300	25.0237275896868	25.582408675405	80.9152946091583	20.9973139319959
Smp_021320	147.042427413098	142.851101672094	190.058931732297	297.07016030122
Smp_021330	83.7495768945115	78.592539477287	291.042153044425	236.629483958126
Smp_021340	508.339412448675	534.375287347688	167.339130492414	478.242540725179
Smp_021370	129.043674274079	198.264590784248	303.704793058644	441.775926116784
Smp_021460	1.67378214665148	1.69351386974899	2.55616236484042	2.82587968254292
Smp_021540	92.5061604212449	88.3089248827619	151.395459691202	116.744860195561
Smp_021550	45.3511655964969	46.6393430065463	284.467163876231	113.04932946621
Smp_021590	12.6282992233297	25.9493096291708	431.745117064068	524.373581302195
Smp_021600	6.26141909656207	17.2389749001709	15.1684459350708	38.8845194645421
Smp_021730	4197.69962027979	6620.83315108749	6866.96240282615	10528.0159234739
Smp_021750	892.765438532584	527.971553239397	542.247678236876	709.39222537977
Smp_021760	3592.3379404675	3371.97961715666	5789.33311756101	5302.53077301723
Smp_021790	87.9787915187465	102.758590511233	128.660812298821	2215.05040732906
Smp_021800	185.039603428495	152.738146026149	298.557303488701	406.684117235613
Smp_021830	231.68189172404	189.543769606994	532.443500448181	400.022317406081
Smp_021870	628.577605229845	704.4812669199	1249.85080554198	2142.06306585161
Smp_021920	1966.8333165946	3136.86275368751	267.557888627672	924.799755042607
Smp_021950	365.464969438892	320.098648842078	611.035629841076	1174.06705177461
Smp_021960	99.1875475082234	163.068288101462	555.067344906533	897.140358468532
Smp_022020	10.1064919620748	11.2050775800552	40.5433475459145	28.2528762380103
Smp_022090	487.165941444679	484.354828306476	833.492864548472	442.845544689071
Smp_022110	188.28762862873	335.278804962234	866.018706524182	546.956359640565
Smp_022130	29.6719074112889	39.716138343291	77.4931241908773	46.2835954702681
Smp_022140	568.579049576511	419.219200163081	1355.92689780862	1049.14600317957
Smp_022150	285.354753915385	267.666518385286	779.695812105794	686.184765375094
Smp_022170	33.752274057468	22.8694000530288	42.1370146248636	55.5050111454732
Smp_022310	42.2683041275746	9.79385383319327	163.026784267112	25.864547721354
Smp_022320	1135.75696497091	868.829372865589	1498.08918835151	1178.04098332573
Smp_022330	2509.88863134507	3244.43698327893	2899.64167359268	5972.50470277272
Smp_022340	1810.69673828716	3609.07461111449	36.3046505685384	651.37749884224
Smp_022400	2979.13942337093	4340.9299257551	1389.88711732888	1764.47223125463
Smp_022430	794.771809864299	899.845174426814	1025.49519749433	1949.95703193843
Smp_022450	1293.1250968828	781.958886901367	5.52499872198329	15.2502781957031
Smp_022460	801.15962458918	1218.58575171051	1307.61703853221	1340.53395723313
Smp_022470	55.8909244448585	125.436683335692	310.132120916137	281.073518929006
Smp_022500	164.715808814465	357.094174316526	337.717081151014	534.136004390933
Smp_022540	820.974521561388	1460.17781993871	638.92722883616	1020.03819819249
Smp_022560	3232.63174297762	2639.710973498	12659.069335625	7824.41565107553
Smp_022570	449.27515501856	793.465416845547	1404.67428902694	3256.61168930281
Smp_022610	5.76967279710396	1.58461330109623	2.47486997761449	2.16488290827493
Smp_022620	78.768734392723	128.29496030686	128.576268340214	69.2602972582172
Smp_022630	67.8507670124535	115.480089320803	146.834972525568	196.60658606272
Smp_022640	14553.3030269094	9787.63646507939	33781.9477041885	26355.8288210672
Smp_022700	447.735987774666	455.821717603433	373.568494947688	495.673468175289
Smp_022730	1161.66879800122	2192.81182867917	5726.35775213696	3627.55656756509
Smp_022740	2.79238151951277	13.8397230152	2.74913217955994	8.15992815919209
Smp_022810	719.117034477156	1580.71138447494	368.964473473077	419.137627664011
Smp_022850	553.846325969498	876.909999577688	1023.46720231908	1914.27723508265
Smp_022870	7.14564403134583	15.9491348480754	13.7500005374288	333.923590011138
Smp_022890	521.643820472781	711.203742022298	2.44322072639849	126.65817992045
Smp_022960	183.248325731561	185.946394556823	898.589974969854	376.18522722453
Smp_022990	3387.08014148134	4236.64695658606	4675.06801540228	3910.39097692885
Smp_023010	854.643958947616	722.089576152923	482.308828574282	519.415783331318
Smp_023150	543.531479359593	402.062143408222	1138.00832643205	540.180238836976
Smp_023160	6649.38421366681	3549.10092709654	3395.7291051715	5108.62824454823
Smp_023170	447.188151156409	357.043810608736	2658.84862257001	1008.4244467376
Smp_023230	1852.4949305053	1634.37773120985	2722.59338907768	2573.97276814965
Smp_023240	279.255672022828	110.825964212716	18.3167570806831	7.75764639140726
Smp_023250	277.509847394071	256.662101661643	1006.42866652641	805.972418577232
Smp_023270	450.828286800378	475.315861946727	1303.81677864947	1021.53442559727
Smp_023290	13.9351678701686	23.4393499251939	2.7651420634942	8.45598779192245
Smp_023360	1991.99226907113	1893.42053028596	6003.34264746565	2524.6076483471
Smp_023470	35.7688014632446	18.3612500294607	92.2870973672553	7.36301616561394
Smp_023530	2727.65709870899	2849.84728082731	10362.80245111	7109.42655270447
Smp_023550	56.431672976189	56.2995429539336	89.6368803259056	57.4711146285979
Smp_023610	2.57941688641828	2.11864505994159	3.07775477801071	2.80463162619762
Smp_023660	2476.34943858899	2117.97309296078	5378.342084025	4668.18583195454
Smp_023700	1610.82148765386	1433.58248642216	3572.06223941637	4235.0607546657
Smp_023840	1932.05766042545	1148.09289323567	983.528688380421	1066.2425708928
Smp_023930	166.596621480591	189.519176569117	292.251706200871	140.9026758188
Smp_023940	58.6924995473985	93.2617125302959	38.7112139450283	46.1631246013862
Smp_023990	85.7401651975893	102.084343646866	486.775032319325	240.511618461898
Smp_024000	75.3410503966653	122.887564371153	185.237478130567	151.4258936869
Smp_024010	16.7317025058547	6.33849160814151	2.5238945269465	3.20405467132664
Smp_024030	1044.32229822701	909.338779271986	3253.33297174082	2012.4592506714
Smp_024060	1007.76880428261	866.843609171417	2232.79693990136	1503.2916138234
Smp_024070	2.3988360857339	4.95609769152389	3.33145622076407	27.8720968243412
Smp_024110	15536.1031340964	14375.1127860046	9619.21393063302	7470.4771045511
Smp_024120	8230.1769836667	6564.56044577172	5391.29442373999	6376.16962183267
Smp_024140	6266.42934064785	5808.26181637517	9549.11163707327	15427.1128008795
Smp_024150	545.728752026986	614.151859105693	1034.22026548677	646.859939860044
Smp_024180	1.76178533917189	1.63818418320849	2.60932574140798	2.90335323355335
Smp_024190	11.005965687958	18.3289540764473	67.1674043275752	37.2257104322957
Smp_024220	27.4790165392699	35.6861210408711	329.229358783858	158.171933146028
Smp_024240	416.411747129066	394.787205009964	818.9996049796	1109.85036582136
Smp_024290	3.70594492578859	5.70242660285598	2.67497968539725	3.05266852117764
Smp_024360	1693.28491032769	1354.83338888217	4010.41072606573	3146.34630295986
Smp_024370	870.175054764044	908.036776680822	396.621645029372	390.424407878074
Smp_024380	115.202761954408	79.1266088591805	752.547440408363	179.760148421471
Smp_024390	1312.89273311789	1054.14444587902	2557.71003046537	1631.39213142512
Smp_024450	13.704993943217	29.3731338178182	16.5247018395576	7.66407905838726
Smp_024490	308.594779063444	305.91746046135	451.941630733704	346.245311943526
Smp_024500	1298.20556569737	1372.93381461767	2246.37690716518	2478.41345351937
Smp_024510	94.0395840796976	109.019086111753	240.311215189854	281.197351848718
Smp_024520	1649.05373249034	2417.38855287188	1227.91166759156	1687.96233109547
Smp_024580	263.587002905555	317.007340575926	653.612546520693	543.692320643815
Smp_024590	450.683666940805	221.037510222607	598.084790773806	305.330281584424
Smp_024660	1.62068954805905	1.64362307653733	4.59891750040786	4.74898875560285
Smp_024670	237.502344379251	268.167434938146	448.906008259289	480.911413242576
Smp_024780	144.468158785182	159.190287159323	416.277795712198	194.206462124581
Smp_024800	91.6343412411449	88.6309861619356	201.825448611257	248.089765983776
Smp_024810	177.03755473744	155.500757757461	6.59783462469152	25.4109971512625
Smp_024820	5957.28777518073	7579.88966207194	135.7298510499	3435.56033122711
Smp_024850	7084.99331402688	3572.30705363559	17837.5988256324	9225.20361984355
Smp_024870	251.310766186103	298.698179697608	51.7661613358895	65.9536208806375
Smp_024880	2254.73794138764	1736.54048229558	4400.50894810035	3027.73391894287
Smp_024900	117.114545397179	112.692815959965	336.831173092861	499.569045836966
Smp_024930	360.559570132415	347.92128724474	873.785938996529	820.051742863466
Smp_024970	15.1585506482821	17.2201168719627	59.8250036385197	51.7358112137008
Smp_025010	2875.51413566365	2372.73487843325	6685.32725798382	5095.42853766908
Smp_025020	717.037880757473	859.107597113349	1235.40661752601	1837.13765897816
Smp_025030	155.768138634107	160.77376665793	38.5700382874154	406.834085299403
Smp_025060	19.4118674349939	41.6561082591055	46.7826362412884	472.43484712675
Smp_025100	1096.53965339255	1013.82589948001	2722.78695992337	4142.04170963267
Smp_025130	472.451167854029	442.871902034209	796.378172197986	802.017198067346
Smp_025150	1636.78680835133	1898.11071312402	2832.70578276454	2039.47786192695
Smp_025160	352.431637735842	315.54252312413	1373.88834619453	389.961869971866
Smp_025260	360.635276806782	395.534227907672	1115.28456063559	1261.46863562215
Smp_025340	991.046349758368	1117.31243261466	1113.83364163179	852.241991473449
Smp_025360	160.112255881122	250.90361939375	242.584870924975	300.511587157326
Smp_025370	2744.4232183324	2263.2380308279	565.230643661658	187.585537792222
Smp_025380	1608.18427749519	3456.4631736146	7.66661999971765	141.066974885294
Smp_025410	212.396880665543	132.909792916651	3.13422585364933	12.0158433323111
Smp_025440	188.030973034444	255.971496166399	344.175639578221	507.891374519353
Smp_025510	555.805592038854	596.181255696995	746.095400048975	483.823648160719
Smp_025550	44.0185382901098	52.541048679628	240.092658998361	120.620334880904
Smp_025560	1022.15832793538	1042.81590674432	2145.96820625835	1791.341800857
Smp_025570	2533.77686656924	2309.8075574766	6690.44143301481	2888.33286240646
Smp_025620	34.7930451588061	45.6463008463166	11.531736590923	683.034060641056
Smp_025670	40.4179930824118	46.6713637668862	210.206438798302	147.778475198426
Smp_025680	705.606286627569	528.259006119853	2803.41695475989	1579.69196788877
Smp_025730	42.1054033725279	93.5815438784012	5.8017311808993	142.72579680625
Smp_025740	932.069669428339	1989.05042577886	839.893206185248	782.811878489296
Smp_025750	275.521188840456	302.192417321117	406.472592195086	432.837762955384
Smp_025800	2162.71458509988	1564.18131703669	4643.01777547048	3528.24085734677
Smp_025830	4315.65248070658	3897.95606449445	44.0342896201882	4207.60362535695
Smp_025860	39479.4468383738	45934.0895978704	13225.1103555048	49702.9759301131
Smp_025950	1569.44633779042	1339.89344220944	3039.16209859331	1735.03562695532
Smp_026030	1.68052192468761	1.7512135050718	46.0172165631755	15.8628295183982
Smp_026040	11.4971031772694	9.89865513412955	210.25784506356	22.2927275983289
Smp_026090	126.399504549744	113.255839007763	210.36453064433	87.9421294207841
Smp_026160	1099.86574041079	938.298838504817	1213.21455621069	1286.91257650622
Smp_026190	1626.70719766734	1964.487538794	4962.24873803749	5701.91566502753
Smp_026230	3260.1923364141	1279.10065140579	2.50424911577964	1514.16268503872
Smp_026250	254.717166529053	335.127715134907	1018.06764534385	867.652671168958
Smp_026260	571.220284387735	634.741288577605	471.037680037522	319.031834809796
Smp_026270	34.8172187068235	54.0775320763125	68.7392347257229	25.5413655002638
Smp_026280	636.314973264794	739.814030897747	553.728482539113	310.860799296565
Smp_026300	276.594223892904	198.339855199729	842.847344697194	592.658581608538
Smp_026310	482.127630450921	654.963132605944	2628.85988738076	2227.10337674522
Smp_026320	8.34362729989355	12.2386176809273	25.2629891198542	15.5524064537706
Smp_026390	100.972113673089	123.038143447274	513.002287217621	271.85382951704
Smp_026400	2.10938484353601	1.80907409611378	708.540498961794	55.6154229675582
Smp_026420	408.270871963998	344.249511543439	197.254450001905	144.040158554493
Smp_026450	1.65659394443226	2.84328951396007	2.459672494525	3.67697605493978
Smp_026460	506.521371299752	584.74274341272	1102.36372540067	950.711301665649
Smp_026540	38.1415085277389	40.8428393577128	33.0585786026745	30.8966245257334
Smp_026560	5789.81958616909	9763.14860609476	8671.8607451213	12132.6846797187
Smp_026570	13.6292371228629	12.470671454911	3.92454687143028	1.99742429425717
Smp_026630	1659.76390081997	1776.96740627507	4273.03604813819	2377.99192213215
Smp_026670	100.656915577469	69.1086380099856	3.09095795397972	78.4628313801211
Smp_026700	136.797578448624	143.884984143439	291.127012588009	123.478655773122
Smp_026770	2185.05927222681	1940.49038246897	4620.03972297233	2624.23763867702
Smp_026810	342.438072969974	325.753338400726	12.128408531846	77.6224228649459
Smp_026820	13.1549886206847	35.6175275357412	6.64311204986433	737.943889794658
Smp_026830	224.53499308885	176.298612008846	205.494209758712	135.856194929596
Smp_026910	301.563893113518	310.771621554626	527.92095048084	207.373714447719
Smp_026930	118.067192606745	142.262176905716	556.313165209274	194.265273152404
Smp_027000	230.464031185575	256.183739712175	538.087580708771	433.819349021971
Smp_027010	676.260594877211	893.922336747028	859.13433369512	1544.88752032907
Smp_027040	194.415953764979	181.979020965634	218.653274019937	103.570321037422
Smp_027080	399.734961016472	272.085508506518	1550.7992122428	585.108190026989
Smp_027210	71.385518637245	49.0962240549473	379.348430574443	265.355426703307
Smp_027220	1017.44918870008	1063.42674183796	3905.00062996657	1988.02715298003
Smp_027250	632.064592563557	641.733821509252	1163.60163269239	647.830104519153
Smp_027300	14.8332321694966	11.0892465122375	52.5193995466958	16.3971955044876
Smp_027340	849.566667296946	527.574883683306	617.975283006313	714.0472524259
Smp_027370	478.293711634586	571.643307338018	959.197961794701	1146.48426376975
Smp_027390	161.919848190731	212.933413605901	507.748909001513	765.455377964696
Smp_027400	7.3002177339641	6.82187631945818	29.8788201957777	21.9560464531708
Smp_027430	132.085897260861	79.9661861392004	11.3888066259783	37.895545639121
Smp_027450	193.149865478882	147.085321149272	92.868285057658	191.127669293103
Smp_027480	4726.99448144828	3551.42599108695	4395.02509504719	3945.61595869406
Smp_027550	50.1144354534865	54.2988476061078	95.0892141267454	71.5681619917897
Smp_027610	23573.8730886837	16400.7552717751	32833.9935056548	36713.7437172146
Smp_027750	27.6044794364481	43.3421089026284	247.310848164782	126.282634303122
Smp_027850	287.732679739716	292.102583197813	909.096597670455	1404.65674750973
Smp_027870	258.285187858033	260.323726260995	530.503102124954	361.351394283241
Smp_027880	1882.48902860196	1335.7849578308	2882.91051331033	3570.43669106405
Smp_027890	9.63109878373106	8.27908031605619	56.6462540885371	23.13514089335
Smp_027900	279.075052695218	337.668775228445	1320.0301430513	769.139126556642
Smp_027910	764.799129363287	708.443253148102	1704.38297738605	2649.57530736688
Smp_027920	63.1480036339888	163.927673509627	15657.9956659969	3365.86614584186
Smp_027970	2.54920193721491	4.28234719650876	25.1854442089065	12.1753946350491
Smp_028030	43.8769427595463	76.7079226303171	129.883097395544	99.4267563004963
Smp_028040	8.12497096184623	5.27555706235862	12.4027281384895	12.0934485614766
Smp_028050	10.1402093956857	5.02975469687935	308.121196762058	174.516657567555
Smp_028060	1037.99824084932	620.80832780687	2391.19950443003	1936.53993764112
Smp_028070	144.532397539077	101.493592815461	189.19004569528	177.893810863146
Smp_028080	581.869585085296	578.38737631103	487.935785358571	346.062990912042
Smp_028100	2928.43326013616	2829.09479362789	2773.20916979821	4330.5853645404
Smp_028120	12.4946662610844	13.904820269903	58.7449910979027	23.5539911670795
Smp_028140	11.5255121960443	11.2784311476779	51.7049410120278	37.5477926215049
Smp_028170	8053.97389025795	9926.79188858668	2056.84278882238	5389.4495496303
Smp_028190	291.479029897358	434.859307031983	559.363498726763	841.199048237462
Smp_028200	50.2942571841382	85.4084076842268	90.3248143533627	75.6409257374825
Smp_028340	945.179988575787	1433.79591466175	4471.40049094964	3060.38011498701
Smp_028360	206.64553502704	501.924588755659	270.983122101794	3066.65287502234
Smp_028370	30.5882243169473	56.862404519086	2.58736211917413	12.7778870296095
Smp_028390	559.928760040352	805.648842844741	512.021896656315	957.129874157772
Smp_028410	761.543705254368	764.066757073812	2105.17274089855	2078.75261118654
Smp_028430	846.621311185716	893.466818580319	1957.03916456841	1922.75524151032
Smp_028440	964.211209218663	1364.50183386814	6981.88267452865	4464.96705980771
Smp_028490	66.9990632016124	78.1451156769129	2.91709577369306	131.791163840982
Smp_028500	1394.55944097102	2377.59337259035	2586.67807068019	3297.36740152377
Smp_028550	5.88296582617495	7.56815257105319	35.0800633715191	50.1493022352071
Smp_028620	69.0312267625894	121.397634111604	227.500775222831	196.900425737344
Smp_028630	744.461362492602	1439.04986127893	977.288009009967	1312.29350000036
Smp_028650	2.94171349208541	9.20330099757856	40.9479072788946	23.920803938888
Smp_028670	497.747608740373	608.011035874097	454.884475811704	71.4066873457671
Smp_028690	55.6135110371576	86.6903695002963	163.156943964523	52.8923600833282
Smp_028730	808.705397946103	789.581455923949	796.847166563354	1579.92508679376
Smp_028840	3385.28731268571	1912.77512574785	16.4707521516448	42.9334513890212
Smp_028860	13.8157668506028	10.6054875449163	15.0102082845993	54.5799974547442
Smp_028870	10422.9721923872	7534.20861676543	3548.0154275297	160.836653432512
Smp_028930	439.146319424681	376.28739441106	752.401573516397	1424.13431569317
Smp_028940	771.392476796604	917.338938962174	1385.77265111438	678.309044994472
Smp_028980	3018.16920126721	1735.40125386108	5001.0384242998	2813.00618274332
Smp_028990	1390.1676744386	936.417998347659	1026.29422996198	1052.67147268874
Smp_029040	429.783816864492	393.510524447979	865.873979308079	426.876021874626
Smp_029060	893.237296958494	798.375313088183	693.258934296321	352.338108463765
Smp_029150	1960.5908207211	1287.32854941334	3555.33234684052	3645.75543417573
Smp_029160	176.600481916361	331.910265816206	118.968939117459	88.1476664113003
Smp_029210	170.875843342804	194.579273714423	226.354681043255	279.547755339625
Smp_029240	422.100893727346	382.391139431127	1902.63254069329	495.695685927081
Smp_029310	128.466845647122	106.409046860957	737.11530522731	186.214707615808
Smp_029360	443.016309153418	322.695811420826	223.265815262206	157.016361945118
Smp_029370	252.240684113314	244.262302805291	430.737837979822	713.742710414173
Smp_029390	2257.23601546532	2396.92716374352	1155.96526728887	1800.13535233105
Smp_029400	1.68741372907713	2.07126011141471	2.86384293581189	4.71426154213132
Smp_029410	71.4012106912714	87.9257327915795	332.325555586265	104.567044995128
Smp_029500	1271.85242773996	1684.96521393733	1220.38029539148	1645.23313862595
Smp_029630	535.918803623769	795.162837115984	1455.94092278543	2167.09171005449
Smp_029670	1.53467130347899	1.84877161685382	3.2942133722749	3.22582246386194
Smp_029700	390.153616165859	354.027526144347	524.270338229591	429.999370723481
Smp_029730	12.8727857404644	14.5902134672271	125.480508597743	61.8007517902205
Smp_029740	298.725257343083	267.118259641022	877.053488696071	396.854335237281
Smp_029750	787.502557010783	574.341263788947	5026.20561731684	1769.71290622228
Smp_029780	116.545615236819	197.293714784842	14.8841679963463	2258.99288814702
Smp_029800	113.639901517725	92.6067176494716	7.03482052796625	37.3355534312729
Smp_029820	15810.2904505628	10194.9543692865	42320.5136350521	28904.6401572649
Smp_029850	302.686269151028	390.919535358416	1412.65083317006	249.729323605463
Smp_029890	124.759680368069	142.168089963779	312.997424242106	252.35145975469
Smp_029900	203.831935177123	133.954246007004	729.884122034417	480.305408446253
Smp_029940	22.5488746113926	29.0782627720608	62.4649831336898	75.8389339893312
Smp_029970	1393.78582276043	1300.4306143386	2848.86611415502	1760.30623014992
Smp_029990	2.04807305932128	3.83365632132773	15.2724355460284	3.08716556089634
Smp_030000	3894.18047164044	2619.16728772676	578.612996808665	1924.84668770092
Smp_030010	820.307550486107	1132.04594471614	1508.90754006285	1430.72053253324
Smp_030020	176.999108453696	116.504012156901	329.910382537765	448.159772172613
Smp_030110	20.6017333337896	29.2216398915228	33.1416715060348	35.4970178965218
Smp_030150	435.803452511303	799.358832335006	247.915031781048	202.108077164143
Smp_030180	850.355802693412	704.49106003089	2464.66750483851	1107.84762393796
Smp_030220	2214.45261309906	2053.89601341474	1695.87261370236	2954.21538172131
Smp_030250	762.377974530069	795.069421742763	1770.48997788163	2058.37310513934
Smp_030280	1127.25755493424	1085.57602300096	2209.15823413668	2331.659135628
Smp_030290	2414.76965982575	1764.9974405851	8091.86771543282	3853.40431456533
Smp_030300	4197.06197910666	3590.92585649961	2908.28753681933	5316.21980929216
Smp_030320	254.077229994863	305.97375966649	1195.23097061423	743.63665354916
Smp_030370	15959.0340679943	15099.6496709413	11582.0597568447	28511.9004109733
Smp_030400	995.703633511833	1540.86555123324	833.828853657796	2916.91370868844
Smp_030500	1716.53490799879	1167.97661127513	1250.04598974961	1147.16379147073
Smp_030690	1.8681618921225	2.34878003383674	51.0122153755942	20.2461474599725
Smp_030730	4952.7732851952	5046.48450418711	9020.46571628784	10195.924060964
Smp_030760	173.411271409773	184.029522116087	493.266604731436	478.153200051978
Smp_030780	52.7178450193505	53.7759241012776	137.4747934135	61.8398995032467
Smp_030830	8470.38671055603	8416.98972912228	30027.1821962044	25538.5081907452
Smp_030860	50.9275660519857	60.1175089239992	204.028134266657	106.177633987504
Smp_030920	5401.16400455278	4659.20320769462	13911.0716235645	8559.30376445502
Smp_030930	247.317202857944	248.574819127691	501.903797547331	649.154057867853
Smp_031000	34.7208735995777	82.9760763850149	127.194165976563	320.787495976801
Smp_031010	52.3916584453765	47.4483054011469	72.9899802812672	99.2828550027009
Smp_031020	1.49193834047193	1.58672989794215	195.677503039058	4.57981850566007
Smp_031040	40.6639268234495	70.3454928570648	225.822159929439	317.802095682509
Smp_031050	60.3162733478894	92.6558724136964	43.7217680737045	143.926135491453
Smp_031070	111.983885370224	226.588033195956	449.235532964338	318.540205536809
Smp_031100	57.2936004460987	37.1251549436572	88.4477387744308	20.044383835338
Smp_031220	37.7891820796723	97.4228813403124	3.86764112176918	53.6109728179001
Smp_031250	194.085991137381	337.282732489506	83.6652227770441	274.096709958165
Smp_031270	43.3984090775627	60.550960325462	50.9379128201657	66.049507672229
Smp_031300	199.169315268244	291.350678649168	8.05544375486388	45.6860657564169
Smp_031310	9666.55960976166	9521.31299533535	19798.4848339529	24710.4358550004
Smp_031350	196.73776840875	250.670282014069	645.72942106257	610.817123954207
Smp_031360	185.872862260246	355.641844052121	744.649874262123	837.070614046454
Smp_031400	29.9621120562778	46.0330002049903	110.203273753137	103.061464130871
Smp_031570	15437.1674966448	13620.1472980648	41119.6881757912	38201.725921766
Smp_031590	1467.28208085578	1374.26804993619	796.328134466815	1017.8152774117
Smp_031690	424.52740824518	402.897690694174	668.609697029675	443.898295449639
Smp_031710	685.974394074726	780.030941831411	2628.29955576851	1820.0777463953
Smp_031720	2077.31341382968	1872.619073419	3339.21920576317	4491.07705629982
Smp_031730	1509.25133839303	1142.51329795075	3693.12012813889	1336.77470469185
Smp_031770	6357.56135563193	8333.52643515877	91.7414333328204	596.139127386029
Smp_031860	3028.37553137093	3485.69117337484	4421.70925908946	3135.22293466063
Smp_031880	11773.2535663947	16258.5555883528	4426.47258212733	10780.3918073617
Smp_031920	2351.74710576557	1985.99057996632	2607.00780767536	4402.5988423681
Smp_031940	34.9129530104342	36.4103219096885	136.454121484861	126.178829017473
Smp_031950	2067.544144737	1821.75414952077	1784.63667531918	1753.03514467861
Smp_031990	67.6460059475285	57.7864578939147	315.419848369714	181.510818361004
Smp_032000	109.283728920275	77.8369740191128	192.039023677262	283.926510912292
Smp_032060	5.13388832615954	8.78618657408604	16.8252905430715	13.5656720026805
Smp_032150	705.531296503349	737.238626908297	702.863625323052	391.651064567334
Smp_032180	10794.5527699776	12510.1164363896	12250.948451512	16755.3934417333
Smp_032230	5117.38265928395	4113.02199208514	6632.64516869671	12745.7247304861
Smp_032240	1011.19049053179	908.942655621523	1826.1691072979	1777.81962434587
Smp_032250	434.762048885723	351.532294062531	1027.67571452577	928.553966609385
Smp_032260	15147.7722064038	9709.00569832767	35756.6889484794	20823.9655500764
Smp_032280	5.97887387465609	5.95404180180768	17.6514653628097	36.762179633606
Smp_032310	2131.83710186415	2263.29760342611	1662.11117832511	2454.76298364318
Smp_032320	8454.92691959006	6241.69336141731	15911.210022258	18699.9191405476
Smp_032420	1689.00814374327	1515.59246568624	2963.73635163235	3935.35077841816
Smp_032480	162.965323122583	168.979636443796	435.246118264406	792.755568015701
Smp_032490	41.1754062896989	74.6318373658041	764.968157222401	1513.82452970261
Smp_032500	44.8478963009171	101.160565808495	2008.29704992881	1829.95990776417
Smp_032510	121.628562957748	133.303359499715	829.624009548931	164.321348782793
Smp_032520	5924.34185357506	8243.34625914329	1407.27539373702	4465.86960632549
Smp_032560	5.99120902740907	3.42458554018022	3.15086868587389	3.27861786702378
Smp_032580	1754.73412126175	1641.89011907989	5562.95165042235	5594.18493239195
Smp_032640	216.93929481537	267.871547364423	153.161878973335	116.265733138895
Smp_032670	1.55893752564537	1.57464425167505	1.99747823726852	6.02496148551558
Smp_032690	2.75259854182017	1.74889276811348	2.68038753662608	2.37237274744896
Smp_032720	21.4399804828063	41.3707469466922	7.83612573222817	791.898894553264
Smp_032760	8827.89387405633	6241.66311702678	34724.0374897261	21782.8813664298
Smp_032770	127.979686917167	140.806765361236	156.18113802212	106.058723407044
Smp_032780	1744.09815439448	1209.99739629844	3415.07064485154	3182.07235236253
Smp_032800	1068.81828016073	1155.57330617846	1696.71192241257	1810.32182868845
Smp_032810	1408.74247821251	1191.50657966799	6662.36304420265	3753.62669564501
Smp_032820	521.819896831706	577.455477172391	850.41268610797	1067.17073855281
Smp_032920	1208.02046491559	1528.19445683894	1508.63242842309	2847.83922475555
Smp_032930	98.0816386969986	155.651257028033	264.953165774838	322.107613628285
Smp_032950	1821.39140092752	3586.76194397218	5437.1887751865	17709.572017115
Smp_032970	6.57049730333992	1.61531734469307	33.1107764897858	3.94490610682992
Smp_032980	1.66038011487894	1.60246835138832	2.59883360916535	3.08240165532827
Smp_032990	1.61813183221834	1.7060734679988	22.6905472747621	3.37467793797257
Smp_033000	70.5857570733151	69.9503972013091	35.6299227594745	878.183887874616
Smp_033010	126.98985416782	137.575264197186	13.5920549887493	2.48690854113112
Smp_033020	1012.8681072489	977.719824386675	4000.52032547842	2151.06470155915
Smp_033040	1613.01476760241	3067.13676793632	11.7950718983197	2416.19740143555
Smp_033050	456.079209724624	714.813121739926	1127.12411237736	858.242491974919
Smp_033110	389.211138862571	324.030569873488	351.251461145119	445.788460029471
Smp_033130	136.392002461804	122.586638545606	281.266290708069	295.248542525889
Smp_033140	177.520082854345	167.965828903825	205.540775215873	241.651502266026
Smp_033150	15.1511252942076	16.8696921250936	13.6028683821399	164.805439540908
Smp_033210	286.025412422533	253.624261983111	642.703273618885	598.904747910351
Smp_033250	122.858833060312	2.9211506118817	7.90114619697035	5.80526761183833
Smp_033260	172.899288897439	189.992598955885	912.801431330845	814.674640284344
Smp_033330	2664.57209894781	3670.47446997289	987.838422152179	1192.413065568
Smp_033350	95.1304416460268	94.9712078490258	263.586794566626	88.9061926330254
Smp_033400	9115.1697946423	6447.06329201499	17820.5641198089	11342.8478351002
Smp_033530	1838.44719656493	2190.48632295201	3083.54102822586	6964.73415413782
Smp_033540	4729.61214263139	4776.65271155081	7976.92098506547	6166.74888469159
Smp_033550	946.342737066409	700.848786750854	75.08453255209	933.373929633174
Smp_033590	100.511650793925	80.7902217655073	258.912438056436	194.440964468435
Smp_033600	121.089615559912	143.40908364703	533.041417988376	353.480984520504
Smp_033610	144.68059672827	121.758434688069	783.387107680553	281.088815855383
Smp_033620	1669.69252062365	2109.79124023069	1709.54920105469	1787.82964952112
Smp_033660	218.467912897752	199.292026087521	281.04431464294	157.117891251479
Smp_033670	1776.80045656441	1488.75823520086	3843.22900953874	2630.22616375178
Smp_033680	114.849149364308	118.04938516358	543.37831497405	223.157141404463
Smp_033700	239.173480804959	301.452080596809	1749.90473846906	957.528985563424
Smp_033710	420.742735851582	464.207263843094	1497.51591016695	1027.25095862704
Smp_033760	857.229920031322	946.080244686997	3146.74478661622	1851.49520552099
Smp_033770	22.452348941988	22.3405096944352	43.2392035686992	43.0400141585747
Smp_033870	74.3690749854897	127.179763742623	163.260109678102	76.1552371699331
Smp_033950	106.085445202077	100.031285807387	831.508867158425	410.310648132223
Smp_033970	449.993761222437	462.735860253094	1779.46633671637	2164.13862964432
Smp_033990	1234.07051943148	1093.13248468934	1975.19645938307	1778.78095623034
Smp_034000	69.8107202942176	82.5146627529556	164.439866762403	280.552834384296
Smp_034010	2.38007477730334	9.11373774480173	18.1116182570868	9.57273587471235
Smp_034030	288.411979591	334.341513471131	638.40944955534	392.487079453509
Smp_034080	2.22125992315516	1.66725236755455	5.93716709645643	15.8223027196607
Smp_034090	25.5420227044298	32.7256512339928	134.343671114863	80.0642644021451
Smp_034100	439.151292073971	381.299272923544	1485.66887489053	970.608714951034
Smp_034120	3529.42744887426	2191.35157395993	538.383195268753	829.587783274832
Smp_034190	1316.90020078807	1237.24739026587	3522.8999809541	2408.23323702802
Smp_034210	7.38930784276618	12.469875403304	56.1441437152166	17.2629220931155
Smp_034270	6.42837825555878	7.20995688889981	36.0501120765766	24.3727411586988
Smp_034310	94.1756866927668	85.8568184775341	263.152404619665	153.59305175356
Smp_034410	5392.04349688458	8706.7906093691	983.326307847429	2349.97136789008
Smp_034420	2128.18151590754	2633.83505673696	762.425378374745	787.467068961865
Smp_034430	1013.91136085975	924.572170175009	2646.9784304056	2142.70539876847
Smp_034440	1.87523936078329	4.85674985801286	2.62787074008475	5.80399483083599
Smp_034450	78.8762232459777	92.2159526751052	350.56290261458	128.165827783725
Smp_034490	5080.35757774314	4420.16173225809	12013.1221031556	7970.22117944338
Smp_034500	32.4812030452128	34.9848130317028	19.6764577699003	167.654904510954
Smp_034530	536.207188090767	333.428811717951	875.374415444599	914.364235153335
Smp_034550	475.69865119425	720.887534351869	18.4840679159175	120.818704467484
Smp_034610	5.74107907604126	2.49120465742758	3.62889978971591	2.70422633404926
Smp_034660	42.1672251901185	44.1279210209038	317.131608847965	9.3412932373677
Smp_034670	563.518541652663	521.526974595603	1309.3674563917	904.291908560199
Smp_034700	790.414872283583	515.748302100675	1924.02355479265	1400.28220105904
Smp_034840	21052.9389607728	19457.0605176236	10720.6775595039	18335.0457300382
Smp_034850	266.346262007172	193.188664716138	2.5162221577482	12.8932738249621
Smp_034870	153.910536451278	191.829000748711	120.069593021187	196.476608771108
Smp_034920	2.01771312713794	9.1033748170764	74.4298657998799	329.062640407017
Smp_034940	2000.42347740563	2641.04858319237	3038.56028162305	1983.81296487185
Smp_034980	192.089766477073	322.271823779267	1508.86041648579	1183.4047190184
Smp_035000	38.112322916967	27.2080270496334	113.897159973767	56.5107143179137
Smp_035010	287.446580763375	201.75183651525	407.159698430469	407.568874339953
Smp_035020	1263.96019917892	1295.08599520622	1047.27852480037	855.687261068273
Smp_035030	466.410657129257	559.339157491526	1349.07991256137	1644.51904673942
Smp_035090	34.836489887016	36.8627627234395	229.534434560668	104.580908592233
Smp_035110	220.369517660747	273.528292884661	252.013659652501	188.572073695034
Smp_035130	2.46764794802977	5.49713872793346	6.74253470841472	10.2426789556709
Smp_035150	554.74690931355	485.019870351801	655.754787609663	791.090133519737
Smp_035190	16.723044624828	19.9051788810577	24.2827845500776	35.3398305730599
Smp_035200	10585.7802286764	9591.56326017048	13094.8715255783	12117.1623132236
Smp_035210	107.034258275229	109.59716395082	2.92551736359258	32.7561594458014
Smp_035220	29.3168804480154	47.2401592760444	5.62201777921888	895.452164503978
Smp_035250	15.999676744127	1.49314721721483	2.97827527030368	2.70383359009281
Smp_035260	1270.6194825004	1228.44689879404	8.70170332753467	28.715385307158
Smp_035270	6090.42379983138	7798.30237333195	6472.05209621974	30087.8716345716
Smp_035280	921.331982065781	725.574489860259	2902.44754896851	1855.58393885847
Smp_035290	10.0356985394629	71.8769089076529	31.4085791038783	68.9251201226
Smp_035300	877.980385141656	763.132712379055	1097.29401483469	974.686574533295
Smp_035310	904.939463579815	897.896975124969	2439.74553756428	2234.73487964485
Smp_035360	120.14306074539	85.5057743441622	343.1016672214	196.107401862044
Smp_035370	1.98546270400156	7.24011290084486	8.76674022569087	137.398179867863
Smp_035390	2.4549077478334	4.95911139906231	23.3344592350366	17.1570710860524
Smp_035410	500.651959187914	399.818165916072	962.723907024211	531.735671678606
Smp_035430	343.821909516287	404.642469404583	364.202579531587	250.385521011466
Smp_035460	15.6080786596226	31.8758131337962	77.9400754506229	92.0037246106508
Smp_035470	3850.96948731938	3740.81226684428	3580.51203375963	3317.00360001884
Smp_035480	210.671723039532	182.552005847182	381.974718245145	253.412341689411
Smp_035500	26.5147121411429	66.6158999232935	2.19187478248854	710.760440071502
Smp_035540	225.451477281958	250.805609916368	489.570755310153	344.190124833122
Smp_035550	106.789955307625	148.417349427838	3.61373687096368	21.4026647823207
Smp_035580	154.770105716907	179.336778295732	99.4605398188893	133.120961375184
Smp_035620	1041.7684736764	793.1956895871	4088.9289360275	1791.02776189714
Smp_035650	17.0067972593324	12.193865495403	4.95228518518726	5.32498495464549
Smp_035720	24.435589669103	13.7936287821686	3.35170531471743	6.55854040890687
Smp_035730	609.29592920127	651.476135600862	1553.96024501089	1166.75341398254
Smp_035790	10040.5671331028	5616.49477830273	25380.5952971669	18711.873585022
Smp_035800	3229.15373164389	1415.74516010939	10048.9662530022	4764.29419336372
Smp_035930	2.43505995761845	10.2748510635566	21.1459008559789	6.71475250668522
Smp_035980	3929.22250959186	3285.94564693669	11096.0681344181	11343.9726740708
Smp_036010	19.8801744165941	19.9731589229768	35.6520005696715	91.308781636945
Smp_036020	1.88453440043879	5.15738130981705	2.37248901834111	2.42654175096913
Smp_036060	675.700656895047	711.547965104017	1095.42440392384	985.80917499389
Smp_036090	196.155589523161	156.225925835292	578.731566860848	353.290438999931
Smp_036130	4382.19970891124	4409.02237506888	5302.92539532454	8719.23847092792
Smp_036180	94.5889369083286	99.2752819028054	136.993844632207	95.4706811522521
Smp_036220	14552.8799650226	10120.5461398974	15732.3188827785	17874.3513487006
Smp_036250	198.657447088422	216.771683835129	469.897826546009	288.461845192502
Smp_036270	7714.3874970013	5660.08537393569	11540.1781338567	10597.4537303
Smp_036370	838.101513543074	1030.79793886343	681.67478600382	1044.20278582162
Smp_036390	890.969971707912	705.62318532264	1641.63173724542	1971.78569247782
Smp_036400	1777.70217006641	1157.15840127321	3102.71989248871	2303.91110685994
Smp_036470	19.9936973022968	61.0911009825423	16.4458136587022	46.4341490164097
Smp_036500	13.2040854835313	28.1161055087679	40.9480516176805	39.8879216946073
Smp_036550	467.809173229676	791.348988653218	896.823152241104	2515.37058803101
Smp_036570	37.582065573189	54.6867151754912	72.3280288018517	154.207222932394
Smp_036590	211.649276663768	320.071595288069	303.800831787849	243.24645626768
Smp_036630	166.528473946911	332.731039634184	600.905026519533	1200.19880886157
Smp_036760	8.87792823298478	4.62852460261739	35.8028565401299	10.0483843269491
Smp_036850	11.6463941217705	15.2921854538353	47.3602083418767	56.791228655199
Smp_036920	1029.81908616688	895.871722460191	1598.47767997026	1433.2297113492
Smp_036930	22.4362597855879	29.5683202104827	80.1026616065127	42.1461513412403
Smp_036940	2221.2851747769	1562.26825587874	4284.73078716081	3307.42790705516
Smp_036950	1182.94128181506	1630.90933950065	1569.32882528739	2029.87343132595
Smp_036990	40.9958136347095	42.7743859415832	25.7232295239145	17.0794900743131
Smp_037120	1058.93960328973	1648.00788595572	1609.28004078834	3305.94752679713
Smp_037190	872.746651403079	1553.76778890332	656.224620124861	2173.00595281008
Smp_037200	213.606980967374	301.72545959462	480.363240098255	613.289212144546
Smp_037210	7.31272446886551	9.36827412313204	26.2672200954032	13.7057793564516
Smp_037230	1724.62852971884	3126.94633847219	8.10722710552276	375.983319760187
Smp_037290	863.735538764679	708.700864622211	2587.47954341705	2046.29227477221
Smp_037380	1559.5985316326	1249.24712209653	3255.6551619059	2408.33899910569
Smp_037400	32.5117637927591	46.9976471778226	114.586850832783	60.7643525228155
Smp_037460	947.200679544248	827.618361328837	3864.60193214819	1993.90638305524
Smp_037530	468.63423045394	298.590967721388	1648.84152331071	880.730811858514
Smp_037540	1858.88007913746	1877.94312522506	2039.66642679901	3671.23051629805
Smp_037590	95.5492261865378	133.755317686393	1753.08971723567	1821.57894833372
Smp_037640	811.668091068831	631.861384767671	158.736797306804	1363.91332428954
Smp_037690	1.95330431138352	2.0753124539196	3.49708329086132	4.60532276636502
Smp_037700	225.303071600402	463.545750474774	437.173415978351	455.252540594402
Smp_037720	697.723846250165	513.846663851265	121.270766329863	85.9922975507172
Smp_037780	2570.10669268464	3471.77590340287	763.030541396138	3449.01495097077
Smp_037860	1388.72701178754	1643.56012795624	557.582830147551	1219.37495553794
Smp_037900	52.5167576887308	55.7225834121496	82.4732215214714	130.407556013198
Smp_037910	1915.87696078395	1949.04343208713	2748.30259838235	1777.63032251429
Smp_037930	865.032860668756	856.591617315298	2585.78591571211	2700.77901589395
Smp_037960	79.005346357637	58.9312503044719	173.875583571488	201.270202183705
Smp_038030	370.199152032093	355.878080657753	354.524574103836	196.665283977767
Smp_038080	233.649023729799	73.6919100824305	882.905599638564	1039.57857471973
Smp_038100	2309.0648144965	2641.44881137183	3416.15361638007	1401.08984015613
Smp_038140	907.826455048101	1042.36928810404	682.21129731329	633.020778864085
Smp_038210	1145.74663431066	906.460185359054	446.387572476988	566.277997583945
Smp_038240	82.9373496579996	111.041774690941	562.490692846313	296.859315419014
Smp_038300	678.753529696468	519.012725530456	1726.80702967141	2136.70420526548
Smp_038330	552.438908812869	332.132326690672	340.788656713823	147.720844403802
Smp_038340	269.435911862278	283.132248769249	178.533120840541	286.800549738484
Smp_038420	329.528826499118	367.688974302105	967.429360074564	401.527051339418
Smp_038430	16.3363878215638	12.6166085535162	29.6637020649721	9.99539632722185
Smp_038440	452.231262479265	683.385623869756	9.16764296160221	205.735029228494
Smp_038510	8656.89947461307	10142.6941525206	25754.0954802544	27450.0563202438
Smp_038530	6.00797621999413	13.4285116316449	16.7172607472303	29.1917663738554
Smp_038540	218.890819412825	456.390128172442	416.496701871055	599.797628611757
Smp_038560	3632.42835686342	5162.73323395817	18818.2809059468	21063.6576217993
Smp_038630	460.53191798662	389.854029699492	708.813651655006	453.104094104088
Smp_038640	248.015775858957	267.71535594993	1058.62285300918	1160.60649931742
Smp_038680	623.023105553073	435.966916866833	2244.11651460234	1569.47563714088
Smp_038700	562.123419861132	555.637253338779	377.336360813674	470.975692952154
Smp_038710	512.717959467428	486.82906992677	678.351318685563	1377.47377481725
Smp_038730	56.1666330515545	64.0605297821631	4.52327144119095	135.551013599339
Smp_038820	124.892913660327	154.307083236948	531.30905391076	426.897075008159
Smp_038830	7.25075892224989	6.68590376682355	8.83328790906708	10.8699500170939
Smp_038840	398.399164538478	593.007062506359	1390.15449631856	1543.7211356492
Smp_038870	226.558705762651	239.200954223834	572.679705082503	456.671768706533
Smp_038930	276.84616363583	290.96439827139	1327.01443570271	760.131575844455
Smp_038940	781.222207940152	615.090316322039	1692.0562340904	1570.36137006852
Smp_038950	23778.0540975901	19319.36273936	7710.12022421302	10680.903361588
Smp_038960	17784.381320902	11955.6628936459	3325.34874477258	7695.4040203353
Smp_038980	108.278420457816	75.8595328695776	206.977468884957	99.7541186203287
Smp_038990	15.9154144148827	25.3130302512969	187.092394567484	85.699302349437
Smp_039000	2643.72683813818	2533.54046438361	4504.48424510024	5407.37714792361
Smp_039080	413.616890057848	410.719016933377	680.680517835186	908.270731654762
Smp_039130	428.007700944922	654.316203713078	334.822503197743	339.560484632246
Smp_039180	1003.59119196664	1068.63679948849	1117.91802065234	1758.7511874666
Smp_039300	190.219716964422	194.189776159387	3.12197231903964	7.95656208652967
Smp_039340	125.333492287093	164.595709492764	1073.3548840977	206.638405969692
Smp_039390	85.1381003635358	79.7531738546095	266.148055303346	137.968354397221
Smp_039400	14892.395841864	13538.2465909898	25434.8195416085	26463.2836520749
Smp_039490	6326.03681021015	604.41717525821	1237.88918533394	1528.51791186133
Smp_039620	497.360405586626	487.452764108569	2.78756730871615	15.4855331004558
Smp_039640	272.274841996855	220.614504926885	518.9856561694	669.389607640068
Smp_039650	683.440134015315	587.770904863843	100.527670373474	525.808346234471
Smp_039670	54.6617726975685	53.3659116144863	132.161604850982	116.209902213319
Smp_039740	814.494007529688	711.50343332953	1271.12464734253	1154.37217893665
Smp_039750	8.58125237674745	14.123780907522	20.2092080757311	66.1093360612616
Smp_039810	184.61593063733	427.340384573451	36.2105434678369	206.546126487023
Smp_039820	266.734253793736	251.08050441147	360.862088578878	235.039490986452
Smp_039870	10.3047217087915	12.4364443720017	16.7618996299543	15.8891572582749
Smp_039980	1281.71834594002	1072.8005348379	1546.48700753611	2447.95295617915
Smp_040020	6.16279919404401	15.8104194975891	414.955371311823	255.064144780596
Smp_040080	857.808156984256	868.538959487367	414.094609215756	670.615000664775
Smp_040100	41.044467534584	50.5329521419618	654.426998504134	132.13919721079
Smp_040130	14648.8758911187	15897.1311915194	21099.5579945413	17319.760266977
Smp_040190	80.3537333756282	36.0101392553446	79.3038108654048	93.8370057208459
Smp_040210	58.8241351220967	42.7441955514055	49.6036433670434	32.3104560735146
Smp_040270	1687.75449838458	1617.08546475229	4978.40558910605	3369.81906373103
Smp_040280	1272.59898530223	1196.89545546052	2146.87026640905	1998.93810680908
Smp_040350	2.59751010250192	4.67721605626828	91.1836261205722	50.2980999274201
Smp_040360	238.19189792505	183.446833033693	143.806260890437	111.121446275259
Smp_040450	49.2042065213317	53.8989360908235	299.504087774137	48.6740019579616
Smp_040460	19.5085228623382	21.9415141316371	108.087936166947	39.0344501526853
Smp_040500	182.119624984084	171.218535860726	389.081758985682	251.073896568249
Smp_040510	31.0575838913025	35.1929344118347	68.7040459371819	185.845375740022
Smp_040540	365.288917064195	348.532224953141	1532.28752421363	914.757237450435
Smp_040550	47.3549994473509	51.8117172634632	66.783094689644	32.3982530526907
Smp_040560	218.730701506472	237.276491997362	813.52546342274	627.11774872556
Smp_040570	3616.54128385503	3972.59404367383	2475.42828863175	3632.13373436389
Smp_040680	4530.64922028643	5628.50903577829	42.278112310793	779.869053319258
Smp_040710	46.9947853712875	22.1214482362199	125.618504332472	61.9272713215842
Smp_040720	70.4098119079145	68.4269843240759	97.2889122556237	38.35754298475
Smp_040770	583.260483526391	497.12516049197	1469.49138128898	536.91912665752
Smp_040790	12889.8450470655	10429.3879425025	12961.5894416467	13869.4410372561
Smp_040800	118.88844352782	295.180376883925	71.3264689677669	181.899108659554
Smp_040960	349.696952999135	263.884748700708	270.314026697279	263.856055929074
Smp_040970	988.607109848477	926.218196544632	802.54329427625	626.500155571098
Smp_040990	204.175334136755	152.541420687179	3450.32581860557	2817.54187313471
Smp_041050	840.197293020415	853.322970566069	2042.82576630767	1610.31504810894
Smp_041060	217.322191234181	170.956706299248	268.36926304913	174.728624181015
Smp_041100	4.53769218314479	3.46763890531856	15.6466320950351	9.15112885286343
Smp_041190	52.8132058456369	73.7985761109063	203.692526726081	109.616974648169
Smp_041210	45.564737405609	39.817823936645	2.77559227675013	4.04819863626626
Smp_041280	22.139388327044	15.6273789190028	2.97573879623	3.50147856491886
Smp_041350	47.3664919857385	94.9296605637978	34.7411015928489	117.04908567319
Smp_041370	39.894894599439	52.5338066201192	175.789749142949	127.612739865023
Smp_041390	1889.37083953146	1544.0499267838	2099.47382341667	967.773664303448
Smp_041430	2423.8350673136	2123.30760254412	532.03212891122	1590.15667425207
Smp_041450	2003.8933631668	1852.731600251	5067.40227476282	4075.9161798577
Smp_041460	12772.0849123805	6643.42421799367	6088.42955732276	9243.36717273181
Smp_041480	947.368280999729	1145.99619747912	1776.53633772043	2519.19711299298
Smp_041490	315.929880556103	270.353978399923	737.301760789517	481.267545092004
Smp_041500	894.997951550888	776.333877751945	2258.85068664868	1327.1518793914
Smp_041520	31.3912474607337	32.9716316302628	55.1177253709629	130.678457149225
Smp_041540	54.0208282053693	598.079990109606	2649.8806361687	23114.6907088821
Smp_041550	782.096031234728	659.442632866156	26.2960436679262	125.640111388261
Smp_041600	116.433380871002	128.349124311132	1032.22746945874	425.674218393987
Smp_041650	13294.614064363	6382.12157746418	39964.5300279115	24379.1876244224
Smp_041680	329.788513871973	237.202379379193	749.635040539205	717.203465925703
Smp_041730	245.39698075153	255.700386267546	388.870211004858	564.058547023132
Smp_041740	2358.49374940329	2069.36900609136	8735.20953575372	6907.98204274059
Smp_041750	29.1940156926413	31.2176826411259	92.6332088994739	114.606369329677
Smp_041760	52.6017041719001	58.6602660782995	193.517469920468	393.664670413321
Smp_041770	67.7999629802618	78.7139637312879	122.23841351413	200.509290312071
Smp_041820	2.01866901844235	5.61280543609213	8.58634885218497	20.5525032146275
Smp_041830	1597.16824506383	1541.58598770952	1192.19744576197	2734.17380875345
Smp_041890	529.291403856944	575.409910452212	1842.03001414352	832.778677625134
Smp_041980	15922.971833769	9691.60425386952	40126.7675863652	37862.0167704432
Smp_042020	226.3391326837	356.609172122284	44.6865740190648	68.8285981436119
Smp_042020, Smp_144980	198.975565257939	280.33324707655	19.2555099873198	23.0081846442578
Smp_042030	1.68215079863401	1.68902483737022	2.46354189830396	2.2542420825576
Smp_042050	277.260238357931	294.356280385842	1165.49204530479	875.291187721784
Smp_042060	1000.86662117189	1491.89884813192	432.937181005166	386.615791565822
Smp_042080	408.807422607237	370.045034128355	602.285881052724	704.082846223966
Smp_042090	10015.5189650048	6171.75629082169	23299.6793504986	14606.1466333775
Smp_042110	523.495801710078	426.837320979604	1055.41962058166	1322.33407577832
Smp_042120	1983.24978627372	1246.69477696782	2.95007577866596	22.1584474128418
Smp_042140	2554.59039841983	3161.41673715602	1017.02575145527	3293.62678766656
Smp_042150	76.8870706378637	5.24952968733333	2.62123333466376	2.16849293423412
Smp_042160	18031.4307250479	18207.8836055264	656.430606402017	5719.55794703673
Smp_042210	201.728619724561	222.554917689916	860.467198662376	917.326287735616
Smp_042230	111.120396931232	201.781486760565	934.36702836658	865.475895071449
Smp_042270	3623.46524949885	3901.34214948699	7087.21644613909	7392.00695497879
Smp_042280	1036.15637404596	945.295500450552	2886.87264741325	2575.85969106519
Smp_042300	1958.66866836086	1350.03557955563	3253.61557467132	1886.61376305683
Smp_042340	9.0884434556202	26.6724015180306	7.11820213541675	25.2398507350391
Smp_042390	1252.23427149004	602.947933753946	3349.54004428803	1442.45983790831
Smp_042400	8245.73970309942	5174.95107694142	9484.20838698336	11866.422101661
Smp_042420	171.847845118419	135.818404086981	742.349464373713	1441.35783894896
Smp_042430	179.92417449375	200.437781808514	1885.14916767746	3172.38426383548
Smp_042440	200.864360042146	113.125465870113	12.3845559300874	61.2454584266562
Smp_042550	520.857719075888	590.107013810534	705.062440126867	551.325494755841
Smp_042560	1002.09612600559	1004.36736198887	5634.32722979575	1700.7264256804
Smp_042590	1617.04536675485	1559.74677417221	3440.17839345827	2040.36032546315
Smp_042650	34.6611232602519	27.9510969719237	96.0007127204781	40.9024129567164
Smp_042670	79.2306061542326	84.2901860894203	346.049094542618	271.573293694949
Smp_042680	3924.82472142482	3002.81757783103	5371.15706249657	3882.01732600526
Smp_042690	1419.27970523533	2160.32029540265	1589.95280620639	2556.62915937291
Smp_042700	982.769242120071	825.740279449173	2713.24051820171	2668.79280511208
Smp_042740	92.6126608474535	146.306320849938	45.3456167643095	681.179817433441
Smp_042770	19.041123350853	15.6751535067746	126.600301115526	85.6344663383189
Smp_042780	768.449254923423	734.418933859359	1557.33383807682	1248.96131425941
Smp_042790	269.9451276236	226.841949093719	471.106043206068	371.26346527242
Smp_042810	6.62937357449888	3.9484873216694	67.730030366463	53.8220660651129
Smp_042910	1637.53070243209	1090.00609565144	294.130822597374	326.378054311864
Smp_042920	297.338920628335	229.955127409022	730.963732813219	568.847480070521
Smp_042980	880.103746360342	843.19940593732	3417.60310589289	2962.81006188259
Smp_042990	93.374523615338	64.5609523937056	42.2548274521808	122.209656608024
Smp_043010	26.9999534855349	30.434303440224	173.419124274436	117.859367663411
Smp_043030	2523.15036663606	2703.88639694588	261.182214839412	2915.11644466738
Smp_043070	113.899959984414	102.617923584077	315.919678317317	123.644787694263
Smp_043100	3012.16960136073	2003.1898321316	7292.61613599798	5712.07242242772
Smp_043110	2055.15758669697	1663.49807724409	13.3750200956544	66.1329102057165
Smp_043120	16453.8330381935	13697.2079364228	5360.26111692074	7872.30294459829
Smp_043130	449.257346914299	432.290717330724	1317.2020820413	534.759781126629
Smp_043150	11794.4710170791	14743.0096428914	12613.3425950629	22846.4917891533
Smp_043170	573.197950352885	1224.75819932113	653.566571559137	1161.3173763116
Smp_043200	20.9522138268089	14.0493111109587	163.387501479874	43.952913371202
Smp_043210	886.072416867568	1085.32849882927	467.019778037806	971.25042115715
Smp_043220	432.775174380718	1000.48002373814	168.256150063421	120.250307596617
Smp_043250	17.9268482636523	12.3001763445544	21.327680489701	17.4075395770122
Smp_043350	213.132711496731	280.922655917744	177.549337444484	173.886965347593
Smp_043360	9.17581015451549	2.53595233001829	11.8992032395449	3.31292673976198
Smp_043390	595.996149597777	414.228741667687	42.4461588898308	232.644498439616
Smp_043420	49.8610349721117	94.2386770255201	3.71447009297056	18.1175568635643
Smp_043430	1.96274929539857	5.77686983746721	6.62142101386505	32.0325150661871
Smp_043500	204.284901641014	344.838452025839	212.004531426979	204.404500549552
Smp_043580	75.8731126532712	62.732399735143	78.8330367076804	60.8084191170605
Smp_043600	666.332694609142	841.029523950829	5406.1977378333	5648.46613886523
Smp_043610	61.0825046227307	57.6046867495936	196.391464623731	127.641578024873
Smp_043620	479.283344638243	329.007351325886	672.688570080378	676.655325689122
Smp_043650	2320.56183532089	720.556469002896	2.84301591940823	29.9409762770265
Smp_043670	750.319791279658	791.87855063451	222.867478442588	300.815778263743
Smp_043780	514.6518007793	921.623444935342	2982.72045498931	2823.00978917984
Smp_043820	211.604474171914	87.6089711964634	427.605218337606	102.195037634759
Smp_043930	679.459323804613	813.073755049838	3260.70110051373	1597.4784472823
Smp_043940	2426.30807970791	2180.50119872036	1235.30101395013	4108.7032745362
Smp_043970	760.945894239488	691.372439333015	1584.80894867801	1518.80582892864
Smp_043990	1713.4169336889	2332.21152073319	1059.82860493571	1594.13874746006
Smp_044000	3761.78738652716	3896.02607637821	1842.63638026211	3852.90878321558
Smp_044010	5156.3704007871	8518.96370159579	72.5098215381901	615.65958384182
Smp_044020	254.447154992797	235.792216867578	647.323758101935	340.991364685626
Smp_044060	5.59666173268566	6.84047198789641	8.46027564844987	3.98304253862678
Smp_044250	330.328096215344	418.326721029854	464.594317450389	270.723185727377
Smp_044260	684.427134882418	915.337738454258	747.086434268337	657.653032571178
Smp_044280	1641.39250969077	1342.56254141196	14331.9880489352	3342.11198546631
Smp_044400	112.967473403201	96.6030469432252	265.431920866105	501.628335108659
Smp_044440	1634.40258006264	3422.0336715099	4178.28899467794	9155.26026406727
Smp_044470	183.683557710771	442.07789440499	396.564464580213	740.534451033908
Smp_044520	399.542864154479	639.925526909035	124.814170725406	355.81936645464
Smp_044530	338.49133933039	568.203491498217	810.76258403152	587.114726898201
Smp_044550	3538.6935974379	4355.0827391219	7281.13751421916	7775.02881112625
Smp_044560	188.772834009372	245.536817787293	998.968996418907	606.677499756416
Smp_044580	14505.5713901684	12566.6728451641	31700.007422649	31795.6876488897
Smp_044680	1202.4241521029	1544.67983355062	1462.19006833678	7147.7704316776
Smp_044690	26.9977484936317	28.6060656602135	59.859641832881	44.8196580015095
Smp_044750	161.984837130112	213.339573470337	23.8938304233519	53.3017547077714
Smp_044770	2032.86614952385	1427.99299604234	2220.71465284595	1451.62834504613
Smp_044800	16.2625559295304	5.31888475060192	23.1067712614536	36.2473832572594
Smp_044810	143.016147282693	137.652013928713	499.378255268385	404.844974805717
Smp_044820	31.5552499833262	22.0523640154237	165.217071063773	76.51828265974
Smp_044850	383.434649938653	326.09879288886	597.515137930576	692.158700412449
Smp_044870	37.7894415400684	44.8898925938249	83.9910718335143	129.996228199506
Smp_044920	142.729447868272	120.484345795037	142.943400332144	186.233154165872
Smp_044950	264.808386340071	395.016131101266	435.748890554353	337.623406903982
Smp_044970	1249.8349976111	1382.89029578986	1676.64627608897	2698.50678904621
Smp_045010	793.571434651095	893.59402776258	150.861207570855	247.609649007266
Smp_045040	822.813123253806	830.581006851898	5236.77895336213	2799.86104209474
Smp_045060	963.621925614172	884.595077967644	1412.14284652187	1386.85891955936
Smp_045070	173.648826029165	148.466410408744	1247.15555847479	504.230880639442
Smp_045080	662.479572362374	608.343717369616	1741.30175200205	1182.72250285402
Smp_045150	756.019745665731	621.379142090805	3585.61285419296	1706.01971091832
Smp_045160	12.2060481469456	15.4138743811314	50.3373390291549	36.4107402503831
Smp_045220	9716.89751197948	10458.2499488061	126.306647263787	1396.593207978
Smp_045230	339.441551793037	327.785317433484	544.110290737242	603.626712525815
Smp_045250	197.585737961283	145.330079644267	333.312090533727	311.529108065734
Smp_045260	244.149805109874	208.710547440223	186.119957841601	254.395341383412
Smp_045300	415.718043024315	535.060258049445	2.79316111605382	51.2416763277559
Smp_045310	395.753659776333	302.025896928744	561.156173614144	964.819553403865
Smp_045360	256.279476110812	501.79871108756	30.4571876674414	263.656057884749
Smp_045400	127.813200264607	126.671398498776	198.008331681823	262.717639981903
Smp_045410	261.676143204931	256.426891818728	223.474949956124	81.4017237751066
Smp_045420	42.6080331302583	32.0619582970954	104.009618016633	48.7736660584958
Smp_045430	898.675173420595	643.255533968361	335.121222838984	216.076415356505
Smp_045470	1.7077899868133	1.63996124955157	2.4895046009202	3.23060946668187
Smp_045480	30.0418003632478	36.9343764275666	41.2190779443903	32.6487724803329
Smp_045500	180.805915647401	163.592849976405	223.963957336373	160.758642978489
Smp_045510	4519.30794049	3724.14932876851	9559.86081191218	14855.8641159841
Smp_045550	1278.49131332368	1751.94258589331	5.74518640004145	89.60543034246
Smp_045560	2280.931784617	2439.63783726148	73.77524701503	981.254685662139
Smp_045590	45.2274395429377	51.8586484921189	135.315889483339	216.686171496313
Smp_045600	8.65142112890458	10.5111778789781	23.4995899001596	29.2128306133634
Smp_045610	4114.69537420949	5885.12312859068	6360.23673895243	6847.06530094625
Smp_045620	1616.03110591624	1759.15007505738	4884.50177240518	2694.46472589461
Smp_045640	11.8125704186473	20.0234402460634	4.56830075725411	2.06834164230697
Smp_045650	142.780620537555	209.83579915931	3.77702087011483	3770.31002535779
Smp_045710	165.788220163687	192.059844295826	270.917283711354	138.342413359655
Smp_045730	544.723672213502	530.173647439487	1417.2701381296	839.952944064694
Smp_045750	40.1901109530294	19.0254869020103	246.959467861793	212.986853670512
Smp_045760	115.695746629754	95.6656870480754	453.181835366416	370.176224091315
Smp_045780	388.219957640568	370.793234382503	324.333340945323	516.29016122922
Smp_045790	503.570890200774	497.859139414416	886.248763855669	851.997275320631
Smp_045810	680.713460503118	509.364525300655	1076.88230046482	468.450798182909
Smp_045860	16.559671735777	21.6174408320069	44.1402416749076	83.5298211876955
Smp_045920	743.997734544207	508.427925289703	396.436308734543	567.527602066188
Smp_045930	616.229851615604	678.567790821135	693.115124130597	940.804392174306
Smp_045940	1347.24206470941	1425.30606362786	219.797527636172	660.390180075768
Smp_045950	4478.21830615167	3746.72478255708	9665.47640794785	16382.4193513008
Smp_045960	152.603568659655	154.500994610476	121.436852434246	92.6187924242464
Smp_045980	129.112329694926	151.46926705534	155.167166726459	215.323958522877
Smp_046020	2109.44238290989	2559.21670189255	5319.38563347984	3011.2896813886
Smp_046030	2966.78972743757	2152.35517608329	2863.52003781227	4729.46970061074
Smp_046040	140.597223834674	122.754784087306	1218.77422779612	1003.04795252633
Smp_046060	651.241156940232	885.765394510144	1008.10946630063	1382.89458069016
Smp_046090	6059.08221045091	7508.62700730616	39978.3972524747	36825.3477571374
Smp_046100	7168.54162731083	6059.72991832436	6718.99469506601	6824.52461705101
Smp_046120	94.6455019571537	47.0866079759212	4.18776142465324	23.621922475024
Smp_046130	140.197265191135	98.9807001596355	337.218533939622	263.167817079342
Smp_046140	68.0707404217727	78.6233479050611	121.51885032685	103.893609274937
Smp_046160	1071.07506332511	1080.83305271646	2952.20848435819	2667.48413744012
Smp_046190	1166.32166174687	1710.96959759039	1035.96900099198	2778.26008429599
Smp_046250	2241.6162343448	1631.66584077184	3215.70736445843	2614.54591208304
Smp_046280	2.19345669970871	4.32199500659606	88.8793879664523	82.2654868140373
Smp_046290	2799.5709419855	4296.12467870596	1752.71579127799	1597.22672631637
Smp_046360	305.361850947156	288.676924726707	58.2968995046126	81.7729770062344
Smp_046410	59.7936534296708	114.455713266155	5.02723783570391	2521.60637599998
Smp_046430	32.6389901994468	34.4909274215455	195.555743140133	82.4765094481474
Smp_046450	804.085330547833	719.770081853954	1413.99624815491	3523.81436097424
Smp_046500	1645.32112505907	1461.59535560492	12345.3556075667	11733.543869483
Smp_046550	482.353403664248	324.712785531427	1973.00930075577	889.903147084701
Smp_046590	30549.686919863	34944.2470594597	45792.6074138711	47259.0722510552
Smp_046600	9998.83513695205	10292.4164238366	33415.4316820758	26227.0707301577
Smp_046630	3061.45907905667	1852.67224716488	8.63188691386484	175.239904467648
Smp_046640	2.27235297505638	6.87432712936661	3.76184346898758	4.38029399923802
Smp_046680	1184.20587979224	850.032461635558	3766.01051165146	1985.47482995967
Smp_046740	1543.28701222522	2165.38601683529	8674.87251599074	4230.5210072908
Smp_046750	382.000381952566	401.828668451391	1286.66155563278	645.441876056324
Smp_046790	697.438884592981	815.905831017566	726.387710447716	876.092356506177
Smp_046810	260.40996629005	575.509207396432	711.148920161051	342.288227463699
Smp_046820	5.95539748654607	10.2614296700273	28.9135121994948	8.03142730754705
Smp_046870	668.027171762298	515.818097052513	666.377763683339	917.730754645434
Smp_046880	441.299182859941	611.296106904065	742.04886491042	717.629052207934
Smp_046890	51.8938778093578	33.9669486359654	47.9703662934419	28.968313841401
Smp_046900	675.956054080581	510.831656003123	821.796779333212	626.396027336
Smp_046930	3256.37903202484	4597.15571387443	4435.38126954171	7898.37835388353
Smp_046980	109.522794393248	152.219577395144	266.057204554289	295.323141664468
Smp_047020	28.8260111022946	46.7500894152063	3.36115967768934	34.1580205536262
Smp_047060	5910.45575930186	8841.66874136026	9664.29412475027	10124.8133224183
Smp_047090	268.123044741605	506.901893037234	691.630067647483	663.313413685673
Smp_047100	127.376724412994	246.156510968345	94.3467224565735	200.385687805788
Smp_047110	325.702986143444	591.270950474911	1869.04171609816	1856.79631460578
Smp_047190	38.0511721694936	46.6654231591372	105.511021792367	53.1441195473065
Smp_047200	10570.1448810776	8607.30829853863	25586.794713094	19369.4636416903
Smp_047240	1.52961963042783	1.63076106669886	2.1088442833108	2.38991563815278
Smp_047320	29.4122366477699	49.6695078861189	326.277173789848	168.377735082578
Smp_047330	24.0658608249969	42.7184776195979	85.9167171562972	68.9898858324611
Smp_047360	795.868630051601	863.256347003184	1769.56008654036	1475.62293048218
Smp_047370	4289.62796945625	6459.54233616648	8430.7260975939	9655.57695844804
Smp_047400	333.925818540065	678.049641744681	5012.70313940192	6334.26399307744
Smp_047410	711.836867729039	894.444568866146	908.613309288448	676.075715309867
Smp_047420	74.6762534582763	75.8763283405371	121.49137362404	74.6135810856512
Smp_047440	864.845908595848	758.903651257693	908.521632002923	822.214389105592
Smp_047450	1374.44333429501	1169.33991939826	1569.07246454209	1506.23776927222
Smp_047460	564.752870171804	730.491835834068	17.4485476544353	79.6651407085966
Smp_047500	292.925830856337	284.092115859627	456.587993659359	513.420255441635
Smp_047540	55.9406454732101	48.885067610007	74.9610515007217	35.9680595949224
Smp_047560	163.120583464333	133.142497509203	395.274198215658	499.996794856904
Smp_047570	783.931571563268	582.584022020781	682.076444339414	794.110409685662
Smp_047610	26.3952626096479	16.534849679745	354.285348316148	399.651693332692
Smp_047620	5.77240186825055	6.8539708424597	447.545007177546	189.432882360027
Smp_047650	8541.63744157976	5322.40001983261	242.135821960745	5101.51424536093
Smp_047660	11399.8587335345	6134.01008529948	301.322154520602	7168.41374241176
Smp_047700	98.7318170895968	119.298768325506	3355.03263767989	2340.58580869163
Smp_047740	2942.89906576105	2460.53678125839	6226.97030063176	7543.90963642351
Smp_047860	246.355398161787	224.998386969455	837.493532739331	557.310064004464
Smp_047870	435.494145067648	487.093242446528	255.580390242707	337.434658841799
Smp_047900	53.3625534307194	133.233674717056	81.5001044078851	27.8846019051239
Smp_048030	2.03724706504585	1.88981502713926	8.17894947798676	4.00449856365411
Smp_048080	60.058729317376	52.3226233500891	364.315244512038	104.207188545549
Smp_048160	120.118863176408	155.363180407913	601.029395648137	830.752171186096
Smp_048230	690.017075925839	1010.10987005474	1533.8078605374	759.253715666899
Smp_048240	188.14340228787	173.811165538052	174.988063749829	89.1627632636653
Smp_048260	2687.78663209032	2191.37678034926	5630.41255173485	4614.18101111319
Smp_048270	555.249504401943	487.398286486169	820.0181128875	898.923270743205
Smp_048280	338.079335283765	311.932666501657	563.820000704975	450.429811787494
Smp_048310	264.228083087256	228.856721397746	522.899043859486	618.82319741916
Smp_048380	111.95483655124	60.0159818095505	2.08940270287899	3.75053158285942
Smp_048420	201.925976908911	167.621148880257	266.360511522578	129.405792652718
Smp_048430	1603.84602479021	1392.42947878822	1802.42206045268	1995.49935123459
Smp_048520	130.511510313397	124.839877601872	101.758684105412	77.6460735759227
Smp_048540	1001.20643285613	1136.12856973428	704.487578105029	722.879859065987
Smp_048550	89.6915820550211	71.8954264813579	162.735392175988	234.534805615336
Smp_048560	309.467422891692	507.941445395867	266.897551902142	557.097409046576
Smp_048620	136.998698130791	122.280903393297	394.5831808934	212.541092787411
Smp_048650	355.945619650561	238.171612318945	1030.81186232109	546.160772784502
Smp_048660	436.438625661826	423.212966967462	5660.19284803053	2151.12427109056
Smp_048680	10.3404788636135	23.0654920231356	19.4621712360133	18.5790639415718
Smp_048690	210.408325200501	560.108002479788	26.9673225422225	13680.6115576312
Smp_048760	444.402256297142	343.226556675295	978.801093251136	544.806116795749
Smp_048810	229.297931614656	216.984267908977	258.991031847586	165.874673453363
Smp_048830	4379.95104448051	3429.20216327885	7056.16051046195	8351.62922847494
Smp_048880	2.01257153024513	5.64779976974014	22.4605901715959	45.7637476971638
Smp_048940	877.822737250321	874.14954975401	1172.37239573756	1115.60099506936
Smp_048970	680.851609201161	566.737145676649	1114.05570451679	939.428630907244
Smp_048980	20.0760931519327	26.6241820784616	33.1102306758954	27.1637437031814
Smp_048990	294.87574668859	341.427006187087	495.503662316274	356.541550550702
Smp_049000	218.3216520073	241.708306260663	534.356950726421	495.743519724608
Smp_049010	30.0828806835333	35.7302822699292	62.3271186005589	13.8829521190022
Smp_049140	347.692516687773	461.258876667675	642.888730894139	548.677591922307
Smp_049150	529.39157897795	420.415340410288	717.364415276992	897.264013510273
Smp_049160	30.8684018095762	21.3217592272719	40.474143131138	91.1564850468591
Smp_049170	2243.56187264575	1876.98812251697	1057.51412931715	710.856360377756
Smp_049230	114.371518019517	208.305548915129	6.90208173001706	59.8671594153019
Smp_049250	248.403551875254	359.420636505722	481.164062344642	640.384370167051
Smp_049270	9278.76513425293	11897.3257649729	204.202437793084	2599.56280641565
Smp_049330	395.013561777301	461.104568144656	576.201718839017	551.68009258156
Smp_049380	112.249982351238	134.303095707525	414.736881487605	122.899792949328
Smp_049390	388.339646806037	351.196604494414	362.53779913481	169.077230043389
Smp_049450	489.378843563398	535.427224678226	113.195637460073	382.728063751333
Smp_049490	652.649401848624	621.785418393632	1519.19299940593	483.476362408345
Smp_049500	123.15005397966	120.368833932317	348.101000137637	102.253484313216
Smp_049510	187.81663218105	156.055392180954	396.359527022737	380.847129470311
Smp_049520	7798.27169316349	7947.45105692675	6183.92342495044	7146.20749189736
Smp_049550	1284.33019515034	910.944599606272	1366.96397706318	1559.1249293229
Smp_049580	88.4432812628531	195.149423016655	7.30277960325268	34.7398242861385
Smp_049600	859.070064886899	672.237724054192	660.818603322354	675.465079276543
Smp_049630	522.24539302546	578.27343953386	1913.40180664792	1210.27884194806
Smp_049680	579.057512833706	473.741961241992	931.517648787763	485.202896229393
Smp_049730	231.246075576676	269.696051026695	526.671959521261	496.541215364789
Smp_049740	20.8806726999729	26.6046616635225	22.6824548944449	81.4683643076363
Smp_049760	17.4204370394795	16.4934591175196	48.4035797166879	25.4172750699717
Smp_049880	848.194938318349	853.387733493553	2804.86300044346	2079.10433754096
Smp_049890	240.116346051351	158.969057939632	871.39470483803	234.374845176158
Smp_049910	157.714951609779	186.502168970791	414.861469718967	649.409921085389
Smp_049920	196.904811888196	237.715551493705	1370.1020920262	582.113563606201
Smp_049930	272.387427734393	258.645212002337	1456.36010336712	447.309957970102
Smp_049970	784.316602578062	850.689696706147	1081.63671602034	1045.72850709705
Smp_049990	85.3858854416101	101.893787973552	124.119472704745	224.133546964404
Smp_050070	120.665684263954	147.145599368296	287.106507685893	238.214417797283
Smp_050070, Smp_148960	12.2619775262809	21.1314293585555	66.4500034679889	36.5356768018285
Smp_050080	446.039789782586	437.735909593671	1863.7010241419	1359.62428992347
Smp_050110	743.310143308012	548.209548952226	1090.49241555338	657.277684161831
Smp_050130	1401.47779778977	1242.32615197032	2608.87277434273	1945.02181660861
Smp_050160	52.8767851430478	39.8660348916779	69.8752840861398	32.4763488367279
Smp_050250	672.718501451125	618.742321259379	2373.0036023198	1424.21912623077
Smp_050270	31.0276193400518	1.39727671579774	3.11666350745948	3.65322322738477
Smp_050280	3507.85341012596	2206.14543425809	12963.8682853562	5529.43399321048
Smp_050350	419.365761539947	317.315547931838	549.882643849751	458.162779534766
Smp_050360	1304.95172186884	996.693279789956	7818.91220348353	3813.07177449789
Smp_050380	2.05606085111798	1.97354677551718	3.48928218770194	8.06853706392451
Smp_050390	13306.3899326056	26027.080310804	7064.66605788044	13243.6053453672
Smp_050430	658.166844959168	567.347833343027	1276.06710035384	564.453499434958
Smp_050470	19.664911969713	11.6039633681825	261.102276895588	119.282782182107
Smp_050520	89.9951779075359	159.197073307417	11.1477660139033	89.9942729944708
Smp_050540	53.9421286533231	63.4527839663579	454.707751987028	169.484518613843
Smp_050570	1278.52366621198	1146.84393517741	2623.68724694834	1322.9236916446
Smp_050590	2415.96163681295	2020.79497270096	8389.5007269225	5750.91963688284
Smp_050630	1365.6224143588	1524.45739898424	552.002794497812	729.481204872429
Smp_050640	20.1051553059664	16.1803487130667	15.6846463026668	6.43234141287222
Smp_050700	542.552840139245	530.80743696268	1495.98886533696	1245.9603703568
Smp_050730	587.381256733392	746.908675872376	3951.19772997021	1035.96491262984
Smp_050740	110.547465333383	150.482639315933	427.092596423681	203.496323425416
Smp_050750	160.235445524065	36.6149466863239	28.9370223621959	136.452843887914
Smp_050760	1406.77055102122	1344.88416496008	91.864045274977	1823.63748882
Smp_050820	436.025491055373	348.3404923227	4091.0210850396	2611.60269212001
Smp_050830	138.117131257323	122.901877395057	536.57238413588	182.415271140023
Smp_050880	1511.35098747618	1522.07812642546	1960.35462227891	3424.40641125038
Smp_050890	37.831327338812	48.1511333630374	75.3778926220037	115.005203240907
Smp_050920	566.287187981964	454.13486836023	900.164932444629	1113.76404412226
Smp_050940	10722.891251734	7088.02535138409	24870.8700080655	19982.9626471861
Smp_051000	1.98983459541368	3.07540084706024	7.08262687654103	6.08591070435943
Smp_051070	13.8168483351777	17.9497604961016	159.27528567781	43.1013851988866
Smp_051080	3915.66168184869	4780.0048205174	6542.77964839072	4501.93120802518
Smp_051110	5.68412986455732	2.35017518195746	13.8050439441966	8.68837903141084
Smp_051130	1.96416395274446	1.74653418799113	2.8470038310564	2.40709588510762
Smp_051210	1159.406616976	1517.2050678993	1545.22425326145	2007.36255891258
Smp_051230	2099.88257358176	1628.04790636283	5803.38039950323	5030.02531782293
Smp_051260	9590.65619463354	6689.31543695267	22089.5474385028	11717.1705203145
Smp_051280	70.2185997411852	80.4327459518372	199.007429560689	175.359301353977
Smp_051300	1330.96699059364	1350.92052090947	2008.61064589386	2356.68504799772
Smp_051320	488.406257639647	445.662306724631	2009.93708684657	2321.65387755885
Smp_051360	807.756179191803	875.641968768635	454.738059269064	435.940887424124
Smp_051390	557.235650221256	543.409307773904	1368.16459101889	1056.49980610488
Smp_051400	519.213053509466	651.33471667005	281.504450049639	19.9171576130937
Smp_051410	215.742111070775	232.857607364005	5.79928317006725	979.765769084767
Smp_051420	934.508179917746	1892.38718266046	4800.44520308606	4950.96455123579
Smp_051500	427.335805422482	246.853306785612	80.4636362660821	90.712444627164
Smp_051510	31.5826535422102	34.3992323482779	184.906465826952	202.646080859136
Smp_051530	283.8383913846	300.626261530511	338.321717573708	254.820684609082
Smp_051550	1547.42326416774	1527.51111802063	4439.9887716345	3202.82913140706
Smp_051580	61.8790949463248	68.5718333307979	282.69265624007	106.234960602395
Smp_051610	21.4886132410714	31.2768061064914	84.1446321084205	96.2951490312109
Smp_051630	1750.34178933414	1837.37125632785	35.4796365552948	113.299560275086
Smp_051640	12.9933502793572	1.51429713318199	2.80529902062607	2.31471403988993
Smp_051660	730.54111098221	778.647550944306	214.631162352147	176.709758297437
Smp_051760	8.1903603116288	7.62742895758984	18.7101861254712	19.6285686690804
Smp_051810	1790.26453105412	1473.75987367994	124.445053534269	565.332889670132
Smp_051920	637.976553133595	794.058866788115	339.253962301995	3223.30007973559
Smp_051990	22.022995506081	30.5790568120447	42.4562626274301	35.205808708579
Smp_052060	2253.78951944873	1873.87814179428	3825.73148063028	2516.27565222985
Smp_052140	339.449475366122	332.50987277716	740.114863395313	904.089229927055
Smp_052150	66.3938798136281	65.8214401027574	783.682228170223	695.770867190217
Smp_052160	8.35615668213718	12.6436613239874	165.566556037008	162.653069495168
Smp_052230	56.9441507580783	76.4738386238683	3.12384367233926	9.4807437446711
Smp_052250	38.9970504527884	47.9611693895251	2.72360503009048	14.8168545057723
Smp_052280	1337.68157559041	1649.33710186841	2284.47861406752	3328.47170113767
Smp_052290	19.0456744499775	15.4660638035122	4.2614279900822	14.8170301439306
Smp_052330	608.684093551894	604.738448557819	539.03935133363	384.701932329087
Smp_052350	31.9957007962255	40.1187981221504	59.3600171376601	34.6769847183231
Smp_052390	47.7903575376635	50.4657719268554	698.221812234972	222.606852206084
Smp_052420	13.8391361508736	11.45776944423	60.7066376095352	46.6389443289826
Smp_052430	261.208519005863	71.0652345199482	91.3258732954975	977.196925562726
Smp_052640	81.1635998311064	85.5249148676225	135.135103407414	119.914652167042
Smp_052660	10.9590656570885	1.58965115491044	2.70555044953035	2.3454346730787
Smp_052710	406.874554985159	331.794088566757	528.889911997068	408.139926963146
Smp_052740	68.3864212211796	34.4290542335955	161.245822240889	65.8541543226688
Smp_052750	145.404999199248	133.950819200724	314.286470048452	504.260249818887
Smp_052780	200.984058685466	123.523330015462	215.57490808053	294.820549692816
Smp_052790	76.8971276893896	103.150737065138	345.263574202478	190.376336269867
Smp_052800	200.460054890523	185.024217980864	322.051821598131	366.618606601231
Smp_052810	762.960684094569	1198.70525164546	826.140087785741	1034.44422754019
Smp_052870	767.453559824842	688.188815629207	1746.33266384686	732.267216196015
Smp_052880	2064.19699090472	473.828498877871	13.5689858120639	42.5743709610905
Smp_052890	159.088877469957	117.812625909812	312.070837749239	59.580828754269
Smp_052910	3468.49983465148	3805.71658884464	2852.52601839723	11212.6778495836
Smp_052990	102.611546634744	70.2196755941179	2.88576007206656	9.08202812700355
Smp_053020	199.840742817549	195.126108242557	611.414344500864	374.486114545169
Smp_053030	1385.01162075312	1282.37989709973	2166.38693621969	2131.59905939299
Smp_053040	395.84116469573	314.829849814935	993.253976730639	381.628698889358
Smp_053060	1237.35683391928	1400.50919262797	1634.58483603821	2615.25141746584
Smp_053100	31.405726008822	36.1733859568434	65.3159627559216	74.7749846956167
Smp_053120	107.265408955832	111.192177707691	1366.27172749398	541.969183043885
Smp_053130	16492.7402921686	10968.6374137354	34920.8040299832	31561.4882533668
Smp_053140	45.8710052850848	30.3131998967576	56.7667070442615	21.1537681535494
Smp_053160	87.8702108930282	82.1081967050716	144.770515450888	146.943477013088
Smp_053220	2795.95906969716	2412.530214246	3087.32900593673	2336.8720133442
Smp_053230	524.291556933191	619.420810903851	5.40556259219694	28.6367343858418
Smp_053420	42.3714418488326	75.4897926635341	13.7885943766441	25.1594628157849
Smp_053430	678.763526267348	1104.89757131972	823.091436693495	2740.93289657912
Smp_053460	95.9450856972772	163.81293504376	205.220935876483	284.646691803154
Smp_053470	12.3472071237215	16.2239214373824	171.21427274311	59.6048878477627
Smp_053510	1205.64568012771	926.979295068017	4061.8386955408	1678.00303501284
Smp_053550	442.417902181682	331.500456801317	966.489242499264	893.591339701806
Smp_053560	303.754056266469	302.220414407839	247.657927855147	196.125158789229
Smp_053610	1165.09301800719	1497.2083802256	3975.60910127849	1806.59201237181
Smp_053640	17.0679554725876	48.409584066892	65.7889254505516	132.220995506297
Smp_053700	2172.19388983101	1894.62048098762	4826.30207703155	4054.83702190395
Smp_053780	2226.8395164375	1681.92086312796	8231.01790071516	3635.52558466548
Smp_053800	435.61366190461	620.959389510362	1557.1461061164	1375.85440983334
Smp_053820	1588.06060677421	1252.10752859002	1688.00403465373	1272.24868686292
Smp_053830	22440.6513130495	12094.7335065168	48994.4373024587	38106.9545460387
Smp_053900	8181.89009433467	6144.36611524638	946.597016191942	1277.99592485508
Smp_053940	5004.87192713574	4032.85798776299	9519.46803972256	10876.1646490984
Smp_053990	146.359204224463	166.472431578906	577.37522715222	503.731018060751
Smp_054010	104.658670347893	43.8776432628358	85.2198098135629	411.298625897304
Smp_054070	715.38937895521	865.191000595707	580.219432209275	387.727970648148
Smp_054120	1329.98898510773	624.669583934566	2248.10645449277	1262.99937101921
Smp_054160	7103.76994490688	16957.5661110377	4301.40682112549	22565.6446816012
Smp_054170	340.379602013441	226.301913420472	8.87978412059641	33.4205137470452
Smp_054200	3207.17946844613	2917.2116004668	3639.63216601802	5112.58086894212
Smp_054220	2076.10005390482	1334.25730984157	1108.6284402572	1034.43133974922
Smp_054240	18627.9957208318	11788.0970811279	33686.1343703706	24129.8502397606
Smp_054300	17.0769866457114	13.3695476166655	3.24724301604165	3.77802153546403
Smp_054310	213.504942982656	196.562356645661	292.225458296595	127.938097570484
Smp_054330	516.325472201529	589.226838581292	174.41122692334	5696.51105001507
Smp_054340	2820.09897465755	3180.24813810196	11434.6125232876	6567.38137786509
Smp_054350	12.5409845947395	41.2847248549591	8.487156865218	7.09313830570882
Smp_054360	897.38918273684	846.943148799468	3654.7191667897	1435.22847984223
Smp_054410	1663.36159512404	1690.71902266213	2345.21117858922	3682.65096438609
Smp_054450	115.922903919889	102.925245963735	586.012921683503	262.368313343894
Smp_054470	226.21730428767	514.300860837202	747.104625910113	4578.05331543248
Smp_054500	845.402245956118	1354.39394226809	2421.25037240115	1379.73391683368
Smp_054540	4594.50674359936	4994.82124520332	5245.76709956036	5795.21655595086
Smp_054600	1533.65575199274	1168.1806175813	5324.83511001671	3403.76985310413
Smp_054610	30.1871318230099	9.88698468191766	806.73241173555	234.4606745006
Smp_054620	23.2516646597315	15.5196595831246	22.665054734272	90.4405689033682
Smp_054730	12.0019825159344	14.5454680791867	118.548379155484	86.3572727491645
Smp_054740	21.2230874801899	24.4408626026527	117.970510972818	38.9060728850463
Smp_054750	123.067059050629	153.726917296179	956.444752009691	551.1894325763
Smp_054770	259.672228878824	140.635090124449	160.777286162337	471.268539257968
Smp_054780	136.613392626016	115.521680303213	422.862514748429	276.789794990217
Smp_054790	102.51843790581	130.339169841372	383.054351991854	477.264969087367
Smp_054800	433.455840398633	419.635300907093	1301.75329543416	852.695450703601
Smp_054810	670.159707765911	431.389040899999	51.3408742782795	610.516777363128
Smp_054820	30.6145156514644	38.0621636476907	214.749957481115	72.5177928088435
Smp_054840	117.968906960059	184.190457293118	2690.40308282211	3157.61789824243
Smp_055050	28019.3025181036	17861.3226320193	38432.0822813778	39361.5057065894
Smp_055090	64.2150761373242	83.6256752079087	117.909125099184	213.003411364267
Smp_055100	68.2159589996053	75.4379727784898	6.12920246291551	65.3335308710096
Smp_055130	101.797459465217	103.190223375872	88.500982524132	52.4578642586165
Smp_055190	759.723859893036	928.82446279672	3256.93905903326	1419.97797091682
Smp_055200	4674.28523074742	4035.68050259887	2981.13657906526	2389.98398462402
Smp_055210	4258.63227472929	3642.32207846532	7233.41514904571	5776.39551657504
Smp_055220	427.448085923958	556.53938543291	4.91100931901704	44.9616353746607
Smp_055240	1.95790514212554	1.7344730579436	2.56629418310493	3.08543523529172
Smp_055260	9.31152938965685	1.51323809241859	3.1035301859078	5.32611724341278
Smp_055310	53.373147176255	57.0863180252518	350.171835325685	327.180936588546
Smp_055340	186.351159278182	195.582261303465	757.17144424882	1151.56137169741
Smp_055390	121.832765666107	97.0361645488277	252.678481538465	108.413239812182
Smp_055400	708.169033516681	534.803237312599	1806.57563323321	873.924366079727
Smp_055420	1709.59647177518	1662.84882283136	876.788502041798	2122.40763697371
Smp_055440	12.3076946501425	11.012220961123	2.64572318856264	5.21419890182939
Smp_055450	410.338677060725	326.197871946523	361.264837141801	332.959985586157
Smp_055500	1.97924282043132	5.86276572754399	176.731923102264	128.61068440776
Smp_055600	1236.73287580816	1139.48650644663	793.524906816393	835.450535000564
Smp_055630	213.897400051262	84.467185818762	3.6443744834167	10.0672196819186
Smp_055640	36.9877465419735	33.2515442901425	60.4118168087857	23.830790435254
Smp_055670	497.07384587351	389.791856848258	466.437609829094	950.450824467039
Smp_055720	95.0012353988634	83.9031668855176	239.288024636562	261.647930526544
Smp_055740	49.8549038370491	166.488277664127	1331.20995573048	9840.66792990861
Smp_055760	301.752588169197	308.68921072573	1021.88260346517	1175.67596830518
Smp_055770	1508.34904399085	2167.69690473834	3615.17373493992	1791.83215270896
Smp_055780	220.296305746197	119.304587209242	3.01699553098786	8.60825152828253
Smp_055800	87.6890315105123	121.48016300082	994.275120954326	420.835922646015
Smp_055870	9225.04700688611	10043.6312172088	2138.65586371631	1572.92417317882
Smp_055880	4635.19514688457	4819.21325298093	4633.79221749137	4106.94433483586
Smp_055890	1670.24687465378	1704.62361214607	11093.5365381151	11798.0771586814
Smp_055900	1450.07951744871	1123.89913562127	729.373027507333	1192.00903965494
Smp_055920	523.278331343816	491.53001424304	1731.24455611633	1545.75313017534
Smp_055960	3510.20194017538	3513.78191012986	6420.78631519119	5092.36540993375
Smp_055990	839.737014538344	886.605396800244	849.142681892471	393.565678869772
Smp_056200	176.491203802313	193.115166839144	236.123625511952	157.904389574401
Smp_056240	199.000731083353	215.568557474453	200.734037213989	227.436047812141
Smp_056260	38.2057454612141	73.0482002680001	448.886867958475	1376.04363218941
Smp_056360	4327.21163630558	4084.6556744983	9803.09462967028	11531.9887975344
Smp_056370	1104.52926029249	1658.8103515974	2759.30898620512	1175.66732416517
Smp_056390	951.347181501472	1127.31933376098	317.65035328478	706.213252034741
Smp_056440	2647.37720246986	2798.93655492954	3600.63926612915	3270.37833699805
Smp_056460	44.8123979753616	42.3661705175979	2.48084010003239	4.57390868387431
Smp_056500	2649.01686407624	2118.07992998512	9036.81085479393	7303.64706995854
Smp_056620	51.8075851043361	49.1669719377217	117.590000305497	114.01462912555
Smp_056640	632.669989482383	461.838622237391	1804.93454830725	1742.5746846994
Smp_056700	28.7831244824895	3.56562313947938	12719.4796634351	89.663950181292
Smp_056760	14603.2793199746	14104.714916061	17860.0934649289	22090.1477858417
Smp_056770	1.84548821839977	1.76223612372888	2.89705529555266	8.19324311015111
Smp_056780	321.454664971237	211.706351834711	503.375690030285	836.764529930241
Smp_056810	480.20245546547	439.421881459713	2400.87281135054	1585.8803882311
Smp_056850	1200.72792826285	1075.44950329357	1125.81872510592	920.912615836218
Smp_056860	1447.99556811002	1393.25873190936	1700.15673921907	1795.88941047466
Smp_056890	270.483537058766	188.278761238523	293.407034645156	228.763513038028
Smp_056900	223.201218848171	165.471078174816	792.221258875551	427.269001133331
Smp_056930	17.514299627297	23.8558988510131	37.4856000586432	44.5884612979123
Smp_056970	38473.6539449119	30884.9557014653	15396.6106513808	19597.2296599039
Smp_056990	487.316203676504	468.3741964224	4.93491707971478	84.7666553051415
Smp_057020	16.6234155915981	18.8750771908167	114.490688152617	35.0552501306044
Smp_057060	250.373644799194	248.922659533056	797.403521488041	1259.72755224496
Smp_057120	8.98726988472408	8.87805614461683	28.1617844967829	14.7854826231435
Smp_057130	233.853127346607	231.299768935012	347.259025656021	99.0085117150853
Smp_057140	1570.00408449807	1439.75193053122	1208.533557299	1472.93601994947
Smp_057210	958.246489465741	856.993904275718	1073.92994025918	1503.38076519892
Smp_057230	148.953464705435	150.943551260334	498.357779979328	302.150791449767
Smp_057320	396.220820020867	249.334485308977	146.454213218528	142.457665917228
Smp_057360	1.56093215658744	1.71660549813646	2.14055777163913	2.09015352366069
Smp_057430	36.3268624504045	43.4281484401	107.691726855409	91.0443050194498
Smp_057530	85.3550268270075	89.6339655729819	4.70995234210081	155.087749108727
Smp_057590	69.0410094815512	51.0719036353055	7.96473370768166	30.0164951364746
Smp_057600	15.9532769870084	33.7580738710154	237.677025627516	528.814125916283
Smp_057620	387.662181753226	463.393546472119	322.22071341291	490.305493167421
Smp_057630	692.688681587728	1635.7589637822	2081.48830875046	4132.12272887883
Smp_057650	4471.26277653208	6035.15454449594	1104.60721442651	1328.82445558208
Smp_057720	9269.9717722616	11022.3795457418	20297.3879721142	20080.8837086357
Smp_057790	1.75848862436915	1.73191714955389	2.56442565337292	2.22149528483262
Smp_057840	2250.73112972175	1460.81710087445	9617.23415547103	5278.81437959366
Smp_057860	622.495006743084	582.350547422954	2.75677936138286	17.252789923385
Smp_057930	351.482187831936	352.360455681266	1364.22581651769	770.49925801011
Smp_058050	260.593738841403	272.702003143256	645.29125166884	658.169536062664
Smp_058130	361.655361326096	354.825975670613	838.045177611466	1048.50980965536
Smp_058140	235.8150378034	279.48820428387	90.2719704773605	67.9613510722985
Smp_058150	1016.90506317373	859.020701170717	1482.14190463545	880.916531467319
Smp_058160	22.4833673256338	18.1330976882711	5516.49587655961	352.401926864597
Smp_058170	329.755291449189	328.33094878868	1076.87397804377	566.649221332807
Smp_058190	1451.78709482959	1033.86685650087	1390.96531195602	10011.8079113332
Smp_058240	598.811962058138	476.064348721181	561.109122142547	300.196813095807
Smp_058320	1303.40183178926	1482.16710377679	7796.05545392433	7455.47829577884
Smp_058350	740.270829077969	481.358246513411	3636.78420517414	1390.84954450046
Smp_058360	22.9256650928252	31.3103208518635	112.112025328959	35.6891643237439
Smp_058380	1.90877685805148	1.86350203970047	3.61815539066419	6.92299737378627
Smp_058400	367.281968403936	460.538625928784	1582.51338529208	1101.98341533959
Smp_058410	15.2939567309643	14.7924671173002	44.4717242913484	23.6012777921587
Smp_058450	120.33858577957	136.493438970611	118.990314666473	102.544789953683
Smp_058460	271.572218551024	289.726867814144	1229.94583813887	409.003437645425
Smp_058480	9.79795237533865	12.829158965935	3.98520727200083	37.517391805555
Smp_058530	893.425479296068	737.883973488085	2364.38008377063	1905.06970075643
Smp_058620	146.499861861875	148.720624368562	476.431315787303	234.39463636216
Smp_058650	749.395403271644	610.578211330321	1973.92367363535	2122.1878666066
Smp_058660	173.514642410631	358.243263874724	46.56754002901	163.101362559477
Smp_058670	60.8870235133903	108.055972029641	56.2206121003556	31.647390735781
Smp_058680	951.403367697041	721.10837217752	4049.54512048007	2491.27818501721
Smp_058720	1253.41268734499	719.441629751209	4571.06479504403	2019.42683117637
Smp_058730	160.381311589968	206.73574745029	183.439074364016	667.207383106334
Smp_058780	156.6154124851	204.526676366589	292.245100337852	457.31099606039
Smp_058790	440.254356728057	759.824608119571	1600.93311888612	3246.1259286175
Smp_058850	1024.34647342397	1264.69791127519	641.960979127276	319.409720716782
Smp_058880	262.50340742424	153.743928929752	1696.37116337685	1318.84216547009
Smp_058980	176.098182862596	217.479461158761	478.837709572995	250.49886339086
Smp_058990	540.778164731356	368.46255921251	2575.38991877594	3549.97946470848
Smp_059130	58.3379951130915	52.5541567214276	120.712876285142	140.014173967358
Smp_059150	371.07992977191	357.82509602584	894.222547825037	451.311141760659
Smp_059170	774.871200762514	679.269607139008	6.48119194896178	224.516573613598
Smp_059200	2707.60490479127	1959.72498636283	91.5096052646897	1639.66021384736
Smp_059210	310.418431884542	305.969457592669	545.171515761661	703.375465316417
Smp_059240	952.974620370943	1445.79035389431	1954.7649365094	3162.82393870192
Smp_059250	24.8872489302552	57.7475941318746	68.3908527486147	62.1289336751734
Smp_059290	1154.34891820351	1683.72770327	2721.05568408997	2277.97353623416
Smp_059310	3.48453247391316	5.7531018828574	17.538170397262	12.5547474949147
Smp_059340	111.594267204189	271.147753473165	228.133079697778	164.087632376041
Smp_059350	4780.94053100752	7526.87442757053	5431.42180328167	9042.08636099261
Smp_059360	705.889951716066	1402.616637666	862.183267818794	2067.96212807581
Smp_059480	7647.1487053277	19024.4936943077	23.7645624595161	1324.63353900004
Smp_059530	19863.2769718428	31568.9735759358	21.1039261968121	764.244884871699
Smp_059540	476.682170379591	630.960614966382	302.534242338685	349.349250168955
Smp_059570	30.1623804540416	31.0395673447741	2.65749406079815	5.57047008677605
Smp_059600	1.9296320295609	3.3788631579642	6.3716717342254	94.3080223983011
Smp_059610	1.53424081427888	1.58619351091624	2.05941864734143	2.12075025508231
Smp_059660	3090.21422079085	3230.12915250045	8942.93272076917	6480.02050837006
Smp_059670	3553.3195674527	1855.0757043306	387.520720365329	3476.32184528639
Smp_059680	297.03904275468	275.293619244101	1015.2790274902	1254.60443532436
Smp_059690	1127.42917712089	1175.6310567383	576.462599752108	531.657022611978
Smp_059710	50.1630299109291	50.6883120297098	229.077304769397	129.458631907276
Smp_059750	331.316377833003	318.93954857026	546.059245459902	280.523314250276
Smp_059780	1019.66586495827	797.84089150086	725.132861597404	1047.75836356116
Smp_059790	1613.8257707307	1495.26087657081	1303.5746070458	907.415713159481
Smp_059800	387.064787987757	370.553537388353	1741.90252627127	1137.62499792432
Smp_059810	1288.36386960133	1123.40117174185	7777.03877649382	4755.60098784022
Smp_059820	430.430520014281	307.305238774684	4.04344602492617	8.90310879466253
Smp_059870	118.331099897121	158.823762011511	438.639416955451	414.868369594331
Smp_059880	222.555586381082	357.868012226684	347.933849095543	274.259556041053
Smp_059910	735.738813847337	1085.47727492753	2155.90089146202	3121.96737201484
Smp_059920	867.434934188774	1832.82242780634	2226.12237027505	2889.74824427889
Smp_059930	4495.25800884903	7811.18484100325	11745.1157729144	14896.1571136902
Smp_059980	1898.57979824615	3012.90395449256	9.77441370838897	212.662667054141
Smp_060010	583.153334199819	489.036073187577	760.037998813984	514.679422276529
Smp_060030	4.44585989451966	5.03841317962031	5.31351120552194	3.50614497570092
Smp_060070	166.715602475276	148.76251481629	667.044781376794	354.121511246189
Smp_060080	23.7844682005331	35.9859673276032	6.81823874664747	14.0740245837457
Smp_060090	10175.1371138747	5209.41060817028	20709.4985502916	17175.6863088318
Smp_060130	6480.47984663414	6260.25512763366	10060.0111953612	10685.2942179248
Smp_060160	99.0076175119522	181.456590448317	9.53693234368128	2084.75480300975
Smp_060170	422.253299486207	344.511618149456	700.670679994597	338.455759612271
Smp_060180	492.473496436605	469.764349103129	1114.79583995361	1169.3695934136
Smp_060190	428.651152583143	403.537025771198	517.93000169846	446.487021430866
Smp_060240	415.202044701815	432.430297573789	340.631171013106	295.996380640001
Smp_060260	2.06892964291921	2.07298489215444	6.49311409143635	2.53179034316833
Smp_060270	1274.9086578792	1046.8508262052	3864.81923291929	3370.66647910033
Smp_060290	610.837189773941	496.193727113306	857.297816897473	588.466148771924
Smp_060400	28.1704694857123	26.8470387294207	81.1040972353751	82.9910018396416
Smp_060410	93.689189415527	153.95730993018	310.712572448133	245.912849628973
Smp_060420	1481.87015712898	1804.00500769783	2236.67310211884	1861.24923323863
Smp_060480	52.4100403158412	53.3778054911149	108.09311771183	49.05993892656
Smp_060490	46.5646776480753	52.6757460567793	197.202405076991	174.657367851214
Smp_060570	425.912388166942	502.865251622262	1049.63010360094	317.410486994311
Smp_060620	34.0215206513825	58.5702140187148	174.663261633002	288.680182407416
Smp_060660	2.06327785642144	5.7813668470329	4.26173155174352	3.23293121740573
Smp_060700	789.667602328912	686.152180908817	482.772730765262	415.128171908652
Smp_060820	423.537926659631	462.491930858114	763.086339642519	691.410025423644
Smp_060830	5.91506257507286	1.39770500277728	2.71243755140076	2.92974548977005
Smp_060860	10.461587139785	14.6177607340958	32.1549893795119	11.3408569781768
Smp_060900	230.39637097553	226.375516347834	412.665387432246	256.551847092286
Smp_060910	2707.20776689164	1647.05996412077	10871.2838722708	5936.69551277317
Smp_060940	121.316337423937	120.971177810216	390.462357968495	117.973574640657
Smp_060950	1585.31330110511	1609.43179971833	1308.3234393691	1004.16803869048
Smp_061000	5.76357757601025	8.58716767716011	32.9257550476012	31.9376142744006
Smp_061100	97.9666030482201	56.0998875183256	212.693793296222	70.1607636230335
Smp_061200	8466.24282745866	3777.07265969061	24086.5242084283	12557.7107877668
Smp_061210	4.07861754913483	92.96561402881	980.276529818999	6175.1216926655
Smp_061220	2.28647145462705	4.27354304287338	43.9562451029025	130.822776560603
Smp_061230	5286.87011330805	6274.41306650522	8878.51202064103	4458.25823204983
Smp_061250	93.9543132907049	160.33563868513	504.24214255273	263.74781390326
Smp_061300	36.7110634265064	51.5400783699748	108.289137270243	63.8516023050692
Smp_061310	1117.0184047302	1249.58728438232	1325.7087682586	1428.76544370488
Smp_061390	2.00998915459908	1.89249169566526	3.8984700899429	12.2729924672823
Smp_061480	11.8618546486377	15.149832356866	5.59404380197188	4.16755642004274
Smp_061510	29.8511029359177	25.7850823837575	165.232204430245	80.3043426466491
Smp_061560	669.486042502831	489.915243850425	4110.47623724938	1296.72524568298
Smp_061570	99.4325342649059	100.681545623992	394.001796594472	337.210728782351
Smp_061580	4964.14141894114	3786.61867894317	6165.97352517006	6813.71130534093
Smp_061590	236.982533514829	255.109643854524	442.443249828463	697.364113115865
Smp_061650	2851.09574492934	2354.53718787378	3789.93608107754	3420.57282552854
Smp_061680	31.4867692459138	36.7113597267139	35.6729748967726	36.9494621312381
Smp_061840	125.415799259341	264.73099006738	304.49677610012	515.601432686699
Smp_061870	2071.6056025772	2241.35538780952	2577.44323280145	3357.18862841131
Smp_061920	1145.11725139839	2517.71695539794	2578.95155411879	4452.84428674974
Smp_061940	229.813542092053	361.323650183152	130.786425711534	303.259028887219
Smp_061950	280.833582346705	426.193689093268	719.859537813273	781.105823846875
Smp_062070	439.584151921434	473.273411264569	167.013877453525	198.183175538413
Smp_062080	63.632835047141	80.4610080076857	630.910857675404	1385.98018886536
Smp_062120	429.39431776974	585.999011385316	623.601591521849	653.678287228429
Smp_062250	1368.95515743189	1332.96844560724	2016.93978300419	2449.3689265267
Smp_062260	3270.0011880359	3064.22198379183	3232.51141464212	5243.9306350038
Smp_062270	977.240524263519	765.099777425216	1458.41551785633	2903.88838045878
Smp_062300	180.517992290463	207.146816091287	288.089859220646	132.92743082957
Smp_062420	19269.8259898341	22759.628349945	27925.114723353	30061.2752193493
Smp_062510	39.315359046574	44.5500878019067	79.1599377405333	66.7751945118105
Smp_062520	147.074664716111	167.523700527652	1035.4119321476	513.023927764747
Smp_062530	15.7456926668512	21.0382059759609	42.2977833683001	43.3928187452242
Smp_062540	167.551314967801	196.79069595094	437.884851153796	405.472599015015
Smp_062610	850.9502263542	745.50475961053	1546.44038107102	1737.01912076582
Smp_062630	2344.57249334362	2080.22259352404	2784.98242044992	3035.89640025511
Smp_062640	4034.90764602805	4453.06505610689	9212.33738561796	6901.42571343727
Smp_062680	161.237957943342	163.142969195702	198.916956223647	220.914322335883
Smp_062720	2574.96172179708	2231.35315682767	4495.97748654215	6124.12620005065
Smp_062760	6.27084259944336	8.96994147729255	2.51616827238953	3.55026427137124
Smp_062790	588.634373771923	479.598976020582	1071.23795434453	659.313782818869
Smp_062830	227.347756108727	220.409278960623	691.836139327719	432.613814317154
Smp_062890	1815.94660066475	1276.15544810276	1779.16504082962	1203.0027399593
Smp_062920	76.8076677127362	80.2233371167217	82.439366022761	122.860979476691
Smp_062950	188.968077528806	222.568769060947	336.599778226432	557.432334489376
Smp_062980	135.055783559257	188.808051685634	547.481238013662	172.66187750305
Smp_063030	2.97374756163551	2.87940033825059	14.1841875722744	10.2002280741766
Smp_063040	887.034094932209	655.498885334117	2486.1815406865	2121.68899650706
Smp_063070	406.947655323996	652.777596334307	2.70065046934259	337.589155164644
Smp_063090	74.3199109031372	108.057487122156	46.130581957483	102.587662274226
Smp_063110	84.2578901414763	75.6762959483784	134.108578581447	176.67918863656
Smp_063120	700.148764991646	624.763981827483	912.645015989546	1143.45037824359
Smp_063180	292.63342110422	367.476240706143	163.847392224225	333.708652348247
Smp_063230	371.338785993512	332.235129711998	957.619591855327	360.661123243595
Smp_063250	1881.50133660872	1619.41045765712	4936.18587487453	4342.69076136794
Smp_063260	883.511691204819	780.207332125046	939.66814020582	1024.71948512051
Smp_063300	9123.89240617102	6742.09484064079	44342.3592251127	21995.4243338707
Smp_063330	11131.4174544577	7621.20987590194	202.004730515006	5094.36020225864
Smp_063340	196.268543764749	169.022694737536	419.745373747522	458.679343497111
Smp_063350	7824.99399590163	4545.27780208397	30018.1600255653	16502.325029111
Smp_063390	553.935071974335	305.847596143836	485.269256504921	560.341494343432
Smp_063420	4586.49847093988	4209.7715479997	16728.2330322873	10789.6684251028
Smp_063480	584.677083178079	723.580016764904	1220.6684715623	1662.67275956136
Smp_063490	25.5706242263776	22.8044584967962	108.59497090253	85.0348920647416
Smp_063500	286.034816428438	344.418773603693	187.847641252903	214.659949769287
Smp_063530	1543.81081805939	2175.27712468853	147.265588124606	2563.32572385418
Smp_063560	219.23850267633	184.592300966528	1263.47592427832	365.346564884309
Smp_063580	859.032621700965	749.811901856688	927.094753963759	1000.03335094166
Smp_063630	42.0360272297735	17.7759600020039	16.0734947061157	194.174307943242
Smp_063640	2245.57009170176	2314.56637308264	4611.35472543651	4043.33426609256
Smp_063650	2102.49032245982	2034.46522094745	4007.42862432566	5677.31894291795
Smp_063670	164.597187271189	116.584281081293	219.793358940689	102.144072830434
Smp_063760	1018.7293530884	1102.06829927416	4303.10343817232	4342.14938843578
Smp_063830	716.294464544309	801.519166310446	2666.09437328377	1748.05644827209
Smp_063930	99.3989484609741	92.6882808265244	3.03683281517043	10.0623863100563
Smp_064010	16.7332918807625	19.2603589331557	33.9572020901026	26.0744495019851
Smp_064020	16.7675436024877	24.8761526839291	76.7548835576089	64.0911659758647
Smp_064030	1936.40446227518	2012.72851428471	3539.51772033827	3671.61692221905
Smp_064040	460.249112779959	524.559732229453	708.215351786529	199.208715143283
Smp_064050	1654.96441557033	1663.7482406769	7951.73785125044	6991.9069087538
Smp_064150	2505.59236531965	2521.08465726513	3817.62368720172	2318.20560985948
Smp_064190	12.1965874937212	14.5909869422684	65.2498838333907	94.3566467201138
Smp_064240	267.841802878997	250.843222721782	318.711941636706	59.1881331494909
Smp_064250	40.8629037526479	30.0330027221664	341.879157961906	172.565083159897
Smp_064280	2.29239237698088	3.99010775045004	8.38953709379701	13.877336183817
Smp_064300	1.53771388254944	1.63189685462784	2.02426628190793	2.09421491451126
Smp_064320	1707.26753871964	1396.70947816136	2896.35262204816	2687.99338415449
Smp_064330	3349.91024272119	2751.21691693608	5769.57138752472	4263.76224256482
Smp_064350	2888.24490424889	3098.87684207363	1810.48020976203	2262.31236304724
Smp_064360	2067.36611571092	1901.80686993023	6265.39765640024	6622.36378770791
Smp_064380	1209.40143859867	1072.79909758703	3511.73899494076	3292.77143752638
Smp_064390	720.557303584503	514.597654911252	1133.34958141766	781.496601549185
Smp_064400	741.191040116897	586.063767019927	834.373941907077	780.960479805472
Smp_064430	907.883588632693	848.916208916089	25.3440250834756	281.133675341335
Smp_064500	678.69811954587	591.865544422333	1225.82379926942	1890.73359458627
Smp_064510	3889.97264479376	2190.3890781311	7736.60124466876	5009.17167218701
Smp_064520	175.915335219387	159.258096865352	351.335865942006	194.957341972828
Smp_064530	1666.28439379994	1640.82654579912	5056.01198540273	3448.78060583947
Smp_064590	1442.25325111449	1688.28835643187	2590.58733907048	3072.51066771253
Smp_064600	1216.83167952001	923.182171878631	3902.11852944204	2679.85185949563
Smp_064640	1263.36189545704	955.293284364411	1547.99163188078	1577.34236712429
Smp_064650	309.19871377306	306.327720842737	597.515724793415	1010.94128270863
Smp_064750	22.5897887207442	43.5326399359382	70.2282569135061	45.6118717273484
Smp_064800	829.325172151768	919.095446010302	2134.53099795756	1139.83505523433
Smp_064830	3422.91606583662	3103.07509284949	7973.77578196407	11118.768205316
Smp_064860	5299.69463431583	5591.48006669161	13475.1638484185	11628.3830868138
Smp_064870	566.590777130262	550.775748174495	780.886884920755	722.584726069096
Smp_064950	4146.37590144666	4820.21696467866	2614.71002959446	8053.00159408315
Smp_065000	51.7769036725204	14.6615253089322	3.46248686851435	7.20104165668395
Smp_065060	172.811257031453	173.590517734623	688.226585621484	578.652855720933
Smp_065110	578.743806439906	688.264323173784	1054.85904156571	1698.08354573263
Smp_065120	162.528186530237	142.477091683358	399.733354437543	194.345374840052
Smp_065130	215.278985396978	268.250054371484	454.956985658977	465.582737166948
Smp_065150	86.5473633093403	143.228079483118	5770.92480786166	4361.74115182115
Smp_065160	112.838335268432	102.422907945048	807.694043911004	391.567169834877
Smp_065170	350.348737852814	259.550885288596	1664.63544618326	825.366805108688
Smp_065180	56.3739699358199	64.9315705020327	91.1560695329396	212.879761118133
Smp_065190	658.977550363649	590.26699822991	649.680155339007	559.394183039114
Smp_065210	697.061101583755	1036.88499370862	155.744955318022	262.733028275791
Smp_065240	121.929795311784	91.7947015964383	377.61163042672	99.8526198922701
Smp_065280	5157.77865270629	4546.88607082756	8357.3233122443	8956.11747959637
[truncated: 4,927 more rows]
