# Supplementary material for: Evolution of gene dosage on the Z-chromosome of schistosome parasites
Source: eLife journal article supplement (doi:10.7554/elife.35684), 2018-07-25
Supplement: supp [file elife_poa_e35684_Supplementary_File_2.xlsx]

## Sheet: Libraries&Captions
LIBRARIES
DNAseq
Species	Accession Number	Library
S. haematobium	ERR037800	Female1
S. haematobium	ERR036251	Female2
S. japonicum	40640	Male
S. japonicum	40641	Female
S. mansoni	ERR562989	Male
S. mansoni	ERR562990	Female
RNAseq
Species	Accession Number	Library
S. mansoni	ERR506076	Mans_F_Ad_1	Not further analysed
S. mansoni	ERR506083	Mans_F_Ad_2
S. mansoni	ERR506084	Mans_F_Ad_3
S. mansoni	ERR506088	Mans_M_Ad_1
S. mansoni	ERR506082	Mans_M_Ad_2	Not further analysed
S. mansoni	ERR506090	Mans_M_Ad_3
S. mansoni	SRR3223444	Mans_F_Som_2
S. mansoni	SRR3223443	Mans_F_Som_1
S. mansoni	SRR3223429	Mans_M_Som_2
S. mansoni	SRR3223428	Mans_M_Som_1
S. japonicum	SRR4267990	Jap_F_Som_1
S. japonicum	SRR4279491	Jap_F_Som_2
S. japonicum	SRR4279833	Jap_F_Som_3
S. japonicum	SRR4267991	Jap_M_Som_1
S. japonicum	SRR4279496	Jap_M_Som_2
S. japonicum	SRR4279840	Jap_M_Som_3
S. japonicum	SRR4296940	Jap_F_Ad_1
S. japonicum	SRR4296942	Jap_F_Ad_2
S. japonicum	SRR4296944	Jap_F_Ad_3
S. japonicum	SRR4296941	Jap_M_Ad_1
S. japonicum	SRR4296943	Jap_M_Ad_2
S. japonicum	SRR4296945	Jap_M_Ad_3
CAPTIONS
Figure 1-source data 1: Comparative genomics: coverage analysis and strata identification
Determination Z chromosome gene content in S. japonicum and S. haematobium: comparative genomics based on 13,276 S.mansoni nuclear genes.
Gene_ID_mans	Gene ID in S. mansoni reference genome (Protasio et al. 2012)
Chrom_loc_GFF_mans	Genomic location in S. mansoni reference genome (Protasio et al. 2012)
First_Base_GFF_mans	First base of the gene in S. mansoni reference genome (Protasio et al. 2012)
Gene_length_GFF_mans	Last base of the gene in S. mansoni reference genome (Protasio et al. 2012)
Bestloc_input_mans	*see Supplementary Data 2
Scaffold_ID_jap	Scaffold ID in S. japonicum reference genome (Zhou et al. 2009)
Scaffold_length_jap	Scaffold length in S. japonicum reference genome (Zhou et al. 2009)
Scaffold_Bestloc_jap	Assigment to S. mansoni chromosomes (output of bestlocation.pl script)
Male_Cov_jap	Genomic coverage in S. japonicum male library (Output of SoapCoverage)
Female_Cov_jap	Genomic coverage in S. japonicum female library (Output of SoapCoverage)
Loc_cov_jap	Output of the R script (Possible values: "Autosome", "Z", "Ambiguous")
Scaffold_ID_haem	Scaffold ID in S. haematobium reference genome (Young et al. 2012)
Scaffold_length_haem	Scaffold length in S. haematobium reference genome (Young et al. 2012)
Scaffold_Bestloc_haem	Assigment to S. mansoni chromosomes (output of bestlocation.pl script)
Female1_Cov_haem	Genomic coverage in S. haematobium male library (Output of SoapCoverage)
Female2_Cov_haem	Genomic coverage in S. haematobium female library (Output of SoapCoverage)
Loc_cov_haem	Output of the R script (Possible values: "Autosome", "Z", "Ambiguous")
Strata1_Stringent	Strata assignment by comparison between S. mansoni and S. japonicum: $Chrom_loc_GFF_mans="Chr_ZW" and $Scaffold_Bestloc_jap= "Chr_PSA" "Chr_Z"
Strata2_Exhaustive	Strata assignment by comparison between S. mansoni and S. japonicum: don't take into account previous annotation
Figure 1-source data 2: S. mansoni reference species: coverage analysis and Z-Autosome assignment
Determination of Z-linked regions in Schistosoma mansoni: genomic coverage analysis of 36,399 genomic windows (10kb)
Scaffold/Chromosome_ID_mans		Genomic location on S. mansoni reference genome (Protasio et al. 2012)
SoapCoverage output per 10Kb windows	Window_start	First base of the analyzed genomic window
	Window_stop	Last base of the analyzed genomic window
	Male_Cov_mans	Genomic coverage in S. mansoni male library (Output of SoapCoverage)
	Female_Cov_mans	Genomic coverage in S. mansoni female library (Output of SoapCoverage)
Z:Autosome assignment based on F:M ratio of coverage		Output of the R script (Possible values: "Autosome", "Z")
Z:Autosome assignment without ambiguity		Exclusion of windows without coverage consistency compared to adjacent windows (Possible values: "Autosome", "Z", "Excluded")
Assignated location of contained genes, used for bestlocation input* *see SupplementaryData1		Location of genes depending on their coordinates on the S. mansoni reference genome and the window Z:Autosome assignment (Possible values: "Chr_1", "Chr_2", "Chr_3","Chr_4", "Chr_5", "Chr_6", "Chr_7", "Chr_PSA", "Chr_Z", "Chr_newZ", "Chr_UP")
Figure 1-source data 3: S. haematobium autosome vs Z-specific region assigment
R output imputing Z or Autosome (or ambiguous) assignement depending on female-to-male ratio of S. haematobium genomic coverage
Scaffold_ID_Shaem	Scaffold ID in S. haematobium reference genome (Young et al. 2012)
Scaffold_length_Shaem	Scaffold length in S. haematobium reference genome (Young et al. 2012)
Depth_ERR036251_Shaem	Genomic coverage in S. haematobium female library #2 (Output of SoapCoverage)
Depth_ERR037800_Shaem	Genomic coverage in S. haematobium female library #1 (Output of SoapCoverage)
log2Fcov_Shaem	log2(Female average of coverage)
flag_Shaem	Output of the R script (Possible values: "Autosome" for autosome or pseudo-autosome assignment, "Z" for Z-specific region assignment, "Ambiguous" when not matching assignment criteria)
Figure 1-source data 4: S. japonicum autosome vs Z-specific region assigment
R output imputing Z or Autosome (or ambiguous) assignement depending on female-to-male ratio of S. japonicum genomic coverage
Scaffold_ID_Sjap	Scaffold ID in S. japonicum reference genome (Zhou et al. 2009)
Scaffold_Size_Sjap	Scaffold length in S. japonicum reference genome (Zhou et al. 2009)
Depth_40640_Sjap	Genomic coverage in S. japonicum male library (Output of SoapCoverage)
Depth_40641_Sjap	Genomic coverage in S. japonicum female library (Output of SoapCoverage)
FMratio_Sjap	Female:Male ratio of coverage
log2FMcov_Sjap	log2(Female:Male ratio of coverage)
flag_Sjap	Output of the R script (Possible values: "Autosome" for autosome or pseudo-autosome assignment, "Z" for Z-specific region assignment, "Ambiguous" when not matching assignment criteria)
Figure 2-source data 1: RPKM calculation for S. mansoni gene expression
Gene expression value normalisation (from Htseq read counts to RPKM values) in S. mansoni
Gene feature	Gene_ID	Gene ID in S. mansoni reference genome (Protasio et al. 2012)
	Genomic_location	Scaffold ID in S. mansoni reference genome (Protasio et al. 2012)
	First_base	First base of the gene in S. mansoni reference genome (Protasio et al. 2012)
	Last_base	Last base of the gene in S. mansoni reference genome (Protasio et al. 2012)
	Gene_length (kb)	Gene length (Last base - First base) in S. mansoni reference genome (Protasio et al. 2012)
Read count		HTseq output
Total count per library		Sum of all read counts for each of the 10 libraries
Total count per library / 1,000,000		Sum of all read counts in millions for each of the 10 libraries
Used RPKM for R		read count for a given gene / (gene length x total read count in millions)
Figure 2-source data 2: RPKM calculation for S. japonicum gene expression
Gene expression value normalisation (from Htseq read counts to RPKM values) in S. japonicum
Gene feature	Gene_ID	Gene ID in S. japonicum reference genome (Zhou et al. 2009)
	Genomic_location	Scaffold ID in S. japonicum reference genome (Zhou et al. 2009)
	First_base	First base of the gene in S. japonicum reference genome (Zhou et al. 2009)
	Last_base	Last base of the gene in S. japonicum reference genome (Zhou et al. 2009)
	Gene_length (kb)	Gene length (Last base - First base) in S. japonicum reference genome (Zhou et al. 2009)
Read count		HTseq output
Total count per library		Sum of all read counts for each of the 12 libraries
Total count per library / 1,000,000		Sum of all read counts in millions for each of the 10 libraries
Used RPKM for R		read count for a given gene / (gene length x total read count in millions)
Figure 3-source data 1: One-to-one orthology S. mansoni vs S. japonicum
S. mansoni and S. japonicum ortholog lists obtained with blat or pubicly availble on WormBase - These lists consider mitochondrial genes
Blat one-to-one orthologs	S. mansoni	7407 genes
	S. japonicum	7407 genes
WormBase orthologs	S. mansoni	4420 genes
	S. japonicum	4643 genes
Figure 3-source data 2: Transcriptomic data, for blat 1-to-1 orthologs
Comparison of gene expression in S. mansoni and S. japonicum: 7,382 newly identified 1-to-1 orthologs (blat analysis) - This list does not consider mitochondrial genes neither redundancies
Gene_ID_mans	Gene ID in S. mansoni reference genome (Protasio et al. 2012)
Chrom_loc_GFF_mans	Genomic location in S. mansoni reference genome (Protasio et al. 2012)
First_Base_GFF_mans	First base of the gene in S. mansoni reference genome (Protasio et al. 2012)
Gene_length_GFF_mans	Last base of the gene in S. mansoni reference genome (Protasio et al. 2012)
Loc_cov_mans	Output of the R script (Possible values: "Autosome", "Z", "Ambiguous")
BlatHomolog_ID_jap	S. japonicum 1-to-1 orthologs of S. mansoni reference genes, resulting from blat analysis
Scaffold_ID_GFF_jap	Scaffold ID in S. japonicum reference genome (Zhou et al. 2009)
First_Base_GFF_jap	First base of the gene in S. japonicum reference genome (Zhou et al. 2009)
Gene_length_GFF_jap	Scaffold length in S. japonicum reference genome (Zhou et al. 2009)
Strata1_Stringent	Strata assignment by comparison between S. mansoni and S. japonicum: $Chrom_loc_GFF_mans="Chr_ZW" and $Scaffold_Bestloc_jap= "Chr_PSA" "Chr_Z"
Strata2_Exhaustive	Strata assignment by comparison between S. mansoni and S. japonicum: don't take into account previous annotation
Normalized expression values (44 columns): e.g. Jap_F_Som_1_RPKM	Species_sex_stage_replicate_unit
Figure 3-source data 3: Transcriptomic data, for WormBase Biomart orthologs
Comparison of gene expression in S. mansoni and S. japonicum: 4,414 publicly available orthologs (WormBase) - This list does not consider mitochondrial genes neither redundancies
Gene_ID_mans	Gene ID in S. mansoni reference genome (Protasio et al. 2012)
Chrom_loc_GFF_mans	Genomic location in S. mansoni reference genome (Protasio et al. 2012)
First_Base_GFF_mans	First base of the gene in S. mansoni reference genome (Protasio et al. 2012)
Gene_length_GFF_mans	Last base of the gene in S. mansoni reference genome (Protasio et al. 2012)
Loc_cov_mans	Output of the R script (Possible values: "Autosome", "Z", "Ambiguous")
BlatHomolog_ID_jap	S. japonicum 1-to-1 orthologs of S. mansoni reference genes obtained at WormBase biomart
Scaffold_ID_GFF_jap	Scaffold ID in S. japonicum reference genome (Zhou et al. 2009)
First_Base_GFF_jap	First base of the gene in S. japonicum reference genome (Zhou et al. 2009)
Gene_length_GFF_jap	Scaffold length in S. japonicum reference genome (Zhou et al. 2009)
Strata1_Stringent	Strata assignment by comparison between S. mansoni and S. japonicum: $Chrom_loc_GFF_mans="Chr_ZW" and $Scaffold_Bestloc_jap= "Chr_PSA" "Chr_Z"
Strata2_Exhaustive	Strata assignment by comparison between S. mansoni and S. japonicum: don't take into account previous annotation
Normalized expression values (44 columns): e.g. Jap_F_Som_1_RPKM	Species_sex_stage_replicate_unit
Figure 4-source data 1: Proteomic data with imputed values - GONADS
Normalized expression values and differential expression analysis in gonads, with imputed values to replace missing ones
Majority protein IDs	Uniprot S. mansoni protein ID (http://www.uniprot.org/taxonomy/6183)
Fasta headers	Uniprot S. mansoni protein fasta sequence header (http://www.uniprot.org/taxonomy/6183)
Razor + unique peptides	Number of quantified peptides
Mol. Weight [kDa]	Protein size
P-Value	Limma statistical test of female-to-male differential expression - non logged value
(-)log10(P-Value)	Limma statistical test of female-to-male differential expression - logged value
logFC	Logged value of female-to-male differential expression
Enrichment	Non logged value of female-to-male differential expression
Significant	(Possible values: "TRUE" or "FALSE")
Log2(iBAQ FG-G)	log2 of normalized iBAQ values for female replicate 1
Log2(iBAQ FG-H)	log2 of normalized iBAQ values for female replicate 2
Log2(iBAQ FG-B)	log2 of normalized iBAQ values for female replicate 3
Log2(iBAQ MG-K_2)	log2 of normalized iBAQ values for male replicate 1
Log2(iBAQ MG-M)	log2 of normalized iBAQ values for male replicate 2
Log2(iBAQ MG-L)	log2 of normalized iBAQ values for male replicate 3
	Razor + unique peptides = 1
	Significant proteins
	Imputed values
Figure 4-source data 2: Proteomic data with imputed values - HEADS
Normalized expression values and differential expression analysis in heads, with imputed values to replace missing ones
Majority protein IDs	Uniprot S. mansoni protein ID (http://www.uniprot.org/taxonomy/6183)
Fasta headers	Uniprot S. mansoni protein fasta sequence header (http://www.uniprot.org/taxonomy/6183)
Razor + unique peptides	Number of quantified peptides
Mol. Weight [kDa]	Protein size
P-Value	Limma statistical test of female-to-male differential expression - non logged value
(-)log10(P-Value)	Limma statistical test of female-to-male differential expression - logged value
logFC	Logged value of female-to-male differential expression
Enrichment	Non logged value of female-to-male differential expression
Significant	(Possible values: "TRUE" or "FALSE")
Log2(iBAQ FG-G)	log2 of normalized iBAQ values for female replicate 1
Log2(iBAQ FG-H)	log2 of normalized iBAQ values for female replicate 2
Log2(iBAQ FG-B)	log2 of normalized iBAQ values for female replicate 3
Log2(iBAQ MG-K_2)	log2 of normalized iBAQ values for male replicate 1
Log2(iBAQ MG-M)	log2 of normalized iBAQ values for male replicate 2
Log2(iBAQ MG-L)	log2 of normalized iBAQ values for male replicate 3
	Razor + unique peptides = 1
	Significant proteins
	Imputed values
Figure 4-source data 3: Proteomic data without imputed values - GONADS
Normalized expression values and differential expression analysis in gonads, without imputed values to replace missing ones
Majority protein IDs	Uniprot S. mansoni protein ID (http://www.uniprot.org/taxonomy/6183)
Fasta headers	Uniprot S. mansoni protein fasta sequence header (http://www.uniprot.org/taxonomy/6183)
Razor + unique peptides	Number of quantified peptides
Mol. Weight [kDa]	Protein size
Enrichment	Non logged value of female-to-male differential expression
Significant	(Possible values: "TRUE" or "FALSE")
log2(FC) without imputation	Logged value of female-to-male differential expression
Log2(iBAQ FG-G)	log2 of normalized iBAQ values for female replicate 1
Log2(iBAQ FG-H)	log2 of normalized iBAQ values for female replicate 2
Log2(iBAQ FG-B)	log2 of normalized iBAQ values for female replicate 3
mean Log2(iBAQ F) without imputation	log2 of normalized iBAQ value average for female
Log2(iBAQ MG-K_2)	log2 of normalized iBAQ values for male replicate 1
Log2(iBAQ MG-M)	log2 of normalized iBAQ values for male replicate 2
Log2(iBAQ MG-L)	log2 of normalized iBAQ values for male replicate 3
mean Log2(iBAQ M) without imputation	log2 of normalized iBAQ value average for male
	Razor + unique peptides = 1
	Undetected
Figure 4-source data 4: Proteomic data without imputed values - HEADS
Normalized expression values and differential expression analysis in heads, without imputed values to replace missing ones
Majority protein IDs	Uniprot S. mansoni protein ID (http://www.uniprot.org/taxonomy/6183)
Fasta headers	Uniprot S. mansoni protein fasta sequence header (http://www.uniprot.org/taxonomy/6183)
Razor + unique peptides	Number of quantified peptides
Mol. Weight [kDa]	Protein size
Enrichment	Non logged value of female-to-male differential expression
Significant	(Possible values: "TRUE" or "FALSE")
log2(FC) without imputation	Logged value of female-to-male differential expression
Log2(iBAQ FG-G)	log2 of normalized iBAQ values for female replicate 1
Log2(iBAQ FG-H)	log2 of normalized iBAQ values for female replicate 2
Log2(iBAQ FG-B)	log2 of normalized iBAQ values for female replicate 3
mean Log2(iBAQ F) without imputation	log2 of normalized iBAQ value average for female
Log2(iBAQ MG-K_2)	log2 of normalized iBAQ values for male replicate 1
Log2(iBAQ MG-M)	log2 of normalized iBAQ values for male replicate 2
Log2(iBAQ MG-L)	log2 of normalized iBAQ values for male replicate 3
mean Log2(iBAQ M) without imputation	log2 of normalized iBAQ value average for male
	Razor + unique peptides = 1
	Undetected
Figure 4-source data 5: Correpondance between Gene_Id and Protein_ID
1-to-1 correspondance between gene and protein nomenclatures
Gene_ID	Gene ID in S. mansoni reference genome (Protasio et al. 2012)
Prot-ID_Gonads	Majority protein IDs column in expression tables - Uniprot S. mansoni protein ID when detected, or "n.a." when not.
Prot-ID_Heads	Majority protein IDs column in expression tables - Uniprot S. mansoni protein ID when detected, or "n.a." when not.
Figure 4-source data 6: Microarray data
Normalized gene expression values (Microarray) used for plots
Gene_ID	Gene ID in S. mansoni reference genome (Protasio et al. 2012)
female_head_norm	Normalized gene expression values in female heads
male_head_norm	Normalized gene expression values in male heads
ovary_norm	Normalized gene expression values in female ovaries
testis_norm	Normalized gene expression values in male testes
